# Supplementary material
Source: PubMed Central journal article supplement (PMC4458727)
Supplement: supp_O114.046391_mcp.O114.046391-2.pdf [file supp_O114.046391_mcp.O114.046391-2.pdf]

# Soluble and exosomal glycopeptides detected in human plasma using PUC-ERLIC method

Click the link below to view data in Mascot Peptide View OR "ALT + <- " (ALT+arrow) to return

- [Spectrum\\_00001\\_B0FWH6\\_RLDVDOALN#RS](#)
- [Spectrum\\_00002\\_B0FWH6\\_RSHEIWTHSCPOSPGN#GTDASH-](#)
- [Spectrum\\_00003\\_B1AHL2\\_RCATPHGDN#ASLEATFVKRC](#)
- [Spectrum\\_00004\\_B1AHL2\\_RNCQDIDECVTGIHN#CSIN#ETCFNIQGGFRC](#)
- [Spectrum\\_00005\\_B1AHL2\\_RNCQDIDECVTGIHNCSIN#ETCFN#IQGGFRC](#)
- [Spectrum\\_00006\\_B1ALQ8\\_KLGYNAN#TSVLSFQAVCRE](#)
- [Spectrum\\_00007\\_B3KUE5\\_RM#KVS#VSCQASVSRM](#)
- [Spectrum\\_00008\\_B3KUE5\\_KVS#VSCQASVSRM](#)
- [Spectrum\\_00009\\_B3KUE5\\_RMKVS#VSCQASVSRM](#)
- [Spectrum\\_00010\\_B3KWK7\\_RGLCVN#ASAVSRL](#)
- [Spectrum\\_00011\\_B3KWK7\\_RAYLLPAPPAPGN#ASESEEDRS](#)
- [Spectrum\\_00012\\_B3KWK7\\_RYKVDYESQSTDTQN#ESSESKRE](#)
- [Spectrum\\_00013\\_B4DLJ9\\_KSHLIIAQVAKNPVGLIGAEN#ATGETDPSHSKF](#)
- [Spectrum\\_00014\\_B4DLJ9\\_KNPVGLIGAEN#ATGETDPSHSKF](#)
- [Spectrum\\_00015\\_B4DLJ9\\_KDVQIIVFPEDGIHGDN#FTRT](#)
- [Spectrum\\_00016\\_B4DLJ9\\_KNPVGLIGAEN#ATGETDPSHSKFLKI](#)
- [Spectrum\\_00017\\_B4DLJ9\\_KSHLIIAQVAKNPVGLIGAEN#ATGETDPSHSKFLKI](#)
- [Spectrum\\_00018\\_B4DLJ9\\_KWNVNAPPTFHSEM#M#YDN#FTLVPVWGKE](#)
- [Spectrum\\_00019\\_B4DLJ9\\_KWNVNAPPTFHSEM#MYDN#FTLVPVWGKE](#)
- [Spectrum\\_00020\\_B4E1F0\\_RVLSN#NSDANLELINTWVAKN](#)
- [Spectrum\\_00021\\_B4E1F0\\_RVLSN#NSDANLELINTWVAKNTNNKISRL](#)
- [Spectrum\\_00022\\_B4E1F0\\_KVGQLQLSHN#LSLVILVPQNLKH](#)
- [Spectrum\\_00023\\_B4E1F0\\_RVLSN#NSDANLELINTWVAKNTNNKI](#)
- [Spectrum\\_00024\\_B4E1F0\\_KGVTSVSOIFHSPDLAIRDTFVN#ASRT](#)
- [Spectrum\\_00025\\_B4E1F0\\_RDTFVN#ASRT](#)
- [Spectrum\\_00026\\_B4E1F0\\_RDTFVN#ASRTLYSSSPRV](#)
- [Spectrum\\_00027\\_B4E1F0\\_KGVTSVSOIFHSPDLAIRDTFVN#ASRT](#)
- [Spectrum\\_00028\\_B4E1Z4\\_KLTDTCGVGN#M#SAN#ASDQERT](#)
- [Spectrum\\_00029\\_B4E1Z4\\_KLTDTCGVGN#MSAN#ASDQERT](#)
- [Spectrum\\_00030\\_B4E1Z4\\_RSPYYN#VSDEISFHCYDGYTLRG](#)
- [Spectrum\\_00031\\_B4E1Z4\\_KLTDTCGVGNM#SAN#ASDQERT](#)
- [Spectrum\\_00032\\_B4E1Z4\\_KALHQVFEHM#LDVSKLTDTCGVGN#M#SAN#ASDQERT](#)
- [Spectrum\\_00033\\_B4E1Z4\\_KALHQVFEHMLDVSKLTDTCGVGN#M#SAN#ASDQERT](#)
- [Spectrum\\_00034\\_B4E1Z4\\_KALHQ#VFEHMLDVSKLTDTCGVGN#MSANASDQERT](#)
- [Spectrum\\_00035\\_B4E1Z4\\_KALHQ#VFEHMLDVSKLTDTCGVGNM#SAN#ASDQERT](#)
- [Spectrum\\_00036\\_B4E1Z4\\_KALHQVFEHMLDVSKLTDTCGVGN#M#SANASDQ#ERT](#)
- [Spectrum\\_00037\\_B4E1Z4\\_KALHQVFEHMLDVSKLTDTCGVGNM#SAN#ASDQERT](#)
- [Spectrum\\_00038\\_B4E1Z4\\_KTMFPN#LTDVRE](#)
- [Spectrum\\_00039\\_B4E1Z4\\_KALHQVFEHMLDVSKLTDTCGVGNMSAN#ASDQERT](#)
- [Spectrum\\_00040\\_B4E1Z4\\_KTM#FPN#LTDVRE](#)
- [Spectrum\\_00041\\_B4E1Z4\\_KLTDTCGVGNMSAN#ASDQERT](#)
- [Spectrum\\_00042\\_B4E1Z4\\_RKIVLDPSGSM#NIYLVLDGSDSIGASN#FTGAKKC](#)
- [Spectrum\\_00043\\_B4E1Z4\\_KKALQAVYSM#M#SWPDDVPPEGWN#RT](#)
- [Spectrum\\_00044\\_B5MCY1\\_KAEM#LN#VSKS](#)
- [Spectrum\\_00045\\_C9JC84\\_KVDKDLQSLEDILHQVEN#KT](#)
- [Spectrum\\_00046\\_C9JC84\\_KVDKDLQSLEDILHQ#VEN#KT](#)
- [Spectrum\\_00047\\_C9JC84\\_KDLOSLEDILHQVEN#KT](#)
- [Spectrum\\_00048\\_C9JC84\\_KDLO#SLEDILHQVEN#KT](#)

[Spectrum\\_00049\\_C9JC84\\_KDLOSLEDILHQVEN#KTSEVKQ](#)  
[Spectrum\\_00050\\_C9JC84\\_KDLOSLEDILHQ#VEN#KT](#)  
[Spectrum\\_00051\\_C9JC84\\_KVDKDLOSLEDILHQVEN#KTSEVKQ](#)  
[Spectrum\\_00052\\_C9JC84\\_KDLOSLEDILHQ#VEN#KTSEVKQ](#)  
[Spectrum\\_00053\\_C9JF17\\_RADGTVNQIEGEATPVN#LTEPAKL](#)  
[Spectrum\\_00054\\_C9JF17\\_RADGTVNQIEGEATPVN#LTEPAKLEVKF](#)  
[Spectrum\\_00055\\_C9JF17\\_RCIQAN#YSLM#ENGKI](#)  
[Spectrum\\_00056\\_C9JF17\\_RCIQAN#YSLMENGKI](#)  
[Spectrum\\_00057\\_C9JF17\\_RCIO#AN#YSLM#ENGKI](#)  
[Spectrum\\_00058\\_C9JF17\\_RCIQAN#YSLM#ENGKIKV](#)  
[Spectrum\\_00059\\_C9JF17\\_RCIO#AN#YSLMENGKI](#)  
[Spectrum\\_00060\\_C9JF17\\_RCIQAN#YSLMENGKIKV](#)  
[Spectrum\\_00061\\_C9JF17\\_RCIO#AN#YSLMENGKIKV](#)  
[Spectrum\\_00062\\_C9JV77\\_KAALAAFNAQNN#GSNFQLEEISRA](#)  
[Spectrum\\_00063\\_C9JV77\\_RKVCQ#DCPLLAPLN#DTRV](#)  
[Spectrum\\_00064\\_C9JV77\\_RKVCQDCPLLAPLN#DTRV](#)  
[Spectrum\\_00065\\_C9JV77\\_KVCQDCPLLAPLN#DTRV](#)  
[Spectrum\\_00066\\_C9JV77\\_RVVHAAKAALAAFNAQNN#GSNFQLEEISRA](#)  
[Spectrum\\_00067\\_C9JV77\\_KVCQ#DCPLLAPLN#DTRV](#)  
[Spectrum\\_00068\\_C9JV77\\_KAALAAFNAQN#N#GSNFQLEEISRA](#)  
[Spectrum\\_00069\\_C9JV77\\_KVCQDCPLLAPLN#DTRVVHAAKA](#)  
[Spectrum\\_00070\\_C9JV77\\_RKVCQDCPLLAPLN#DTRVVHAAKA](#)  
[Spectrum\\_00071\\_C9JV77\\_KAALAAFNAQNN#GSNFQ#LEEISRA](#)  
[Spectrum\\_00072\\_D6RAR4\\_RDSVSVVLGQHFFN#RT](#)  
[Spectrum\\_00073\\_D6RD17\\_REN#ISDPTSPLRT](#)  
[Spectrum\\_00074\\_D6RD17\\_RIIVPLNNREN#ISDPTSPLRT](#)  
[Spectrum\\_00075\\_D6RD17\\_REN#ISDPTSPLRTRE](#)  
[Spectrum\\_00076\\_D6REX5\\_KEGYSN#ISYIVVNHOGISSRL](#)  
[Spectrum\\_00077\\_D6REX5\\_KVSEHIPVYQQEENQTDVWTLN#GSKDDFLIYDRC](#)  
[Spectrum\\_00078\\_D6REX5\\_KVSEHIPVYQQEEN#QTDVWTLNLSGSKD](#)  
[Spectrum\\_00079\\_D6REX5\\_KEGYSN#ISYIVVNHO#GISSRL](#)  
[Spectrum\\_00080\\_D6REX5\\_KLKKEGYSN#ISYIVVNHOGISSRL](#)  
[Spectrum\\_00081\\_D6REX5\\_KKCGN#CSLTTLKD](#)  
[Spectrum\\_00082\\_D6REX5\\_KKCGN#CSLTTLKDEDEFCKR](#)  
[Spectrum\\_00083\\_D6REX5\\_KCGN#CSLTTLKDEDEFCKR](#)  
[Spectrum\\_00084\\_D6REX5\\_KCGN#CSLTTLKDEDEFCKRV](#)  
[Spectrum\\_00085\\_E7ER40\\_KEQ#EAAMEIQ#EPAAN#KS](#)  
[Spectrum\\_00086\\_E9PD35\\_KLVIQAN#VSAM#YKC](#)  
[Spectrum\\_00087\\_E9PFZ2\\_KEN#LTAPGSDSAVFFEQGTTRI](#)  
[Spectrum\\_00088\\_E9PFZ2\\_KELHHLQEQN#VSNAFLDKGEFYIGSKY](#)  
[Spectrum\\_00089\\_E9PFZ2\\_KAGLQAFFQVQECN#KS](#)  
[Spectrum\\_00090\\_E9PFZ2\\_KELHHLQEQN#VSNAFLDKG](#)  
[Spectrum\\_00091\\_E9PFZ2\\_KEN#LTAPGSDSAVFFEQ#GTTRI](#)  
[Spectrum\\_00092\\_E9PFZ2\\_KEHEGAIYPDN#TTDFQ#RA](#)  
[Spectrum\\_00093\\_E9PFZ2\\_KEHEGAIYPDN#TTDFQRA](#)  
[Spectrum\\_00094\\_E9PFZ2\\_KAGLQAFFQVQECN#KSSSKD](#)  
[Spectrum\\_00095\\_E9PFZ2\\_KAGLQAFFQVQECN#KSSSKDNIRG](#)  
[Spectrum\\_00096\\_E9PFZ2\\_KELHHLQEQN#VSNAFLDKGEFYIGSKYKK](#)  
[Spectrum\\_00097\\_E9PFZ2\\_KELHHLQEQN#VSN#AFLDKGEFYIGSKY](#)  
[Spectrum\\_00098\\_E9PFZ2\\_KELHHLQ#EQN#VSNAFLDKG](#)  
[Spectrum\\_00099\\_E9PIT3\\_RDKLAACLEGNAEGLGTNYRGHVN#ITRS](#)  
[Spectrum\\_00100\\_E9PIT3\\_KLAACLEGNAEGLGTNYRGHVN#ITRS](#)  
[Spectrum\\_00101\\_E9PIT3\\_RWVLTAAHCLLYPPWDKN#FTENDLLVRI](#)  
[Spectrum\\_00102\\_E9PIT3\\_RSEGSSVN#LSPPLEQCVPDRGQQYQGRL](#)  
[Spectrum\\_00103\\_E9PIT3\\_RSRYPHKPEIN#STTHPGADLQENFCRN](#)  
[Spectrum\\_00104\\_E9PIT3\\_RSRYPHKPEINSTTHPGADLQEN#FCRN](#)  
[Spectrum\\_00105\\_E9PPW2\\_RVEEDTKVN#STVIPETQLQAEDRD](#)

[Spectrum\\_00106\\_F5GY80\\_KEYESYSDFERN#VTEKM](#)  
[Spectrum\\_00107\\_F5H7E1\\_RAN#LSSQALQM#SLDYGFVTPLTSM#SIRG](#)  
[Spectrum\\_00108\\_F5H7E1\\_RAN#LSSQALQM#SLDYGFVTPLTSM#SIRG](#)  
[Spectrum\\_00109\\_F5H7E1\\_RAN#LSSQALQM#SLDYGFVTPLTSM#SIRG](#)  
[Spectrum\\_00110\\_F5H7E1\\_RAN#LSSQALQM#SLDYGFVTPLTSM#SIRG](#)  
[Spectrum\\_00111\\_F5H7E1\\_KICDLLVANNHFAHFFAPQN#LTNM#NKN](#)  
[Spectrum\\_00112\\_F5H7E1\\_RDKICDLLVANNHFAHFFAPQN#LTNM#NKN](#)  
[Spectrum\\_00113\\_F8W6L6\\_KVVSSVLO#FGN#ISFKK](#)  
[Spectrum\\_00114\\_F8W7G7\\_RDQCIVDDITYNVN#DTFHKR](#)  
[Spectrum\\_00115\\_F8W7G7\\_RDQCIVDDITYNVN#DTFHKRH](#)  
[Spectrum\\_00116\\_F8W876\\_RFGYILHTDN#RT](#)  
[Spectrum\\_00117\\_F8W876\\_RFGYILHTDN#RTCRV](#)  
[Spectrum\\_00118\\_F8WCZ6\\_KNCGVN#CSGDVFTALIGEIASPNYPKPYENSRC](#)  
[Spectrum\\_00119\\_F8WCZ6\\_RYTCEEPYYMENGGGGEYHCAGN#GSWVN#EVLGPELPC](#)  
[Spectrum\\_00120\\_F8WF14\\_KYGPNNETQ#NN#STSWPVFKS](#)  
[Spectrum\\_00121\\_F8WF14\\_KYGPNNETQ#N#STSWPVFKS](#)  
[Spectrum\\_00122\\_F8WF14\\_KYGPN#ETQNN#STSWPVFKS](#)  
[Spectrum\\_00123\\_F8WF14\\_RDN#YTKAEELSR](#)  
[Spectrum\\_00124\\_F8WF14\\_KYGPN#ETQ#NSTSWPVFKS](#)  
[Spectrum\\_00125\\_F8WF14\\_KYGPN#ETQNN#STSWPVFKS](#)  
[Spectrum\\_00126\\_F8WF14\\_KYGPN#ETQ#NNSTSWPVFKS](#)  
[Spectrum\\_00127\\_F8WF14\\_KYGPN#ETQ#N#STSWPVFKS](#)  
[Spectrum\\_00128\\_F8WF14\\_KYGPN#ETQ#N#STSWPVFKS](#)  
[Spectrum\\_00129\\_F8WF14\\_KYGPN#ETQNN#STSWPVFKS](#)  
[Spectrum\\_00130\\_G3V350\\_RAQLLQGLGEN#LTERS](#)  
[Spectrum\\_00131\\_G3V350\\_RQINSYVKN#KTQGKI](#)  
[Spectrum\\_00132\\_G3V387\\_KADTHDEILEGLNFN#LTEIPEAQIH-](#)  
[Spectrum\\_00133\\_G3V5I3\\_RTLN#QSSDELQLSMGNAMFVKE](#)  
[Spectrum\\_00134\\_G3V5I3\\_RTLN#QSSDELQLSMGNAM#FVKE](#)  
[Spectrum\\_00135\\_G3V5I3\\_KYTGN#ASALFILPDQDKM](#)  
[Spectrum\\_00136\\_G3V5I3\\_RTLN#QSSDELQLSM#GNAM#FVKE](#)  
[Spectrum\\_00137\\_G3V5I3\\_KKLINDYVKN#GTRG](#)  
[Spectrum\\_00138\\_G3V5I3\\_RTLN#QSSDELQLSM#GNAMFVKE](#)  
[Spectrum\\_00139\\_G3V5I3\\_KLINDYVKN#GTRG](#)  
[Spectrum\\_00140\\_G3V5I3\\_KKLIN#DYVKN#GTRG](#)  
[Spectrum\\_00141\\_G3V5I3\\_KGLKEN#LTETSEAEIHQSFOHLLRT](#)  
[Spectrum\\_00142\\_G3V5I3\\_KGLKEN#LTETSEAEIHQSFO#HLLRT](#)  
[Spectrum\\_00143\\_G3V5I3\\_KLIN#DYVKN#GTRG](#)  
[Spectrum\\_00144\\_G3V5I3\\_KFN#LTETSEAEIHQSFOHLLRT](#)  
[Spectrum\\_00145\\_G3XAK1\\_KGTGN#DTVNLVALLNVISNOECNIKH](#)  
[Spectrum\\_00146\\_G3XAK1\\_RGKGEYRGTAN#TTTAGVPCQRW](#)  
[Spectrum\\_00147\\_G3XAK1\\_KGEYRGTAN#TTTAGVPCQRW](#)  
[Spectrum\\_00148\\_G3XAM2\\_KLISN#CSKFYGNRF](#)  
[Spectrum\\_00149\\_G3XAM2\\_KFLNN#GTCTAEGKF](#)  
[Spectrum\\_00150\\_G3XAM2\\_KLSDLSIN#STECLHVHCRG](#)  
[Spectrum\\_00151\\_G3XAM2\\_KFLN#N#GTCTAEGKF](#)  
[Spectrum\\_00152\\_G3XAM2\\_RSIPACVPWSPYLFQPN#DTCIVSGWGRE](#)  
[Spectrum\\_00153\\_G3XAM2\\_KLPYQCPKN#GTAVCATNRR](#)  
[Spectrum\\_00154\\_G3XAM2\\_KFLNN#GTCTAEGKFSVSLKH](#)  
[Spectrum\\_00155\\_H0Y2P0\\_KAFN#STLPTM#AQM#EKA](#)  
[Spectrum\\_00156\\_H0Y512\\_RAGPN#GTLFVADAYKG](#)  
[Spectrum\\_00157\\_H0Y512\\_KLLSSETPIEGKN#M#SFVNDLTVTQDGRK](#)  
[Spectrum\\_00158\\_H0Y5A1\\_KSVVAPATDGGLN#LTSTFLRK](#)  
[Spectrum\\_00159\\_H0Y5A1\\_RWFSAGLASN#SSWLRE](#)  
[Spectrum\\_00160\\_H0YAC1\\_RIYSGILN#LSDITKD](#)  
[Spectrum\\_00161\\_H0YAC1\\_KIYPGVDFGGEELN#VTFVKG](#)  
[Spectrum\\_00162\\_H0YAC1\\_RIVGGTN#SSWGEWPWQVSLQVKL](#)

[Spectrum\\_00163\\_H0YAC1\\_RIYSGILN#LSDITKDTPFESQIKE](#)  
[Spectrum\\_00164\\_H0YAC1\\_RGVNFN#VSKVSSVEECQKR](#)  
[Spectrum\\_00165\\_H0YAC1\\_KLQAPLN#YTEFQKPICLPSKG](#)  
[Spectrum\\_00166\\_H0YAC1\\_RGVNFN#VSKVSSVEECQKRC](#)  
[Spectrum\\_00167\\_H0YAC1\\_RGVNFN#VSKV](#)  
[Spectrum\\_00168\\_H0YCG2\\_KVASVININPN#TTHSTGSCRS](#)  
[Spectrum\\_00169\\_H0YFH3\\_KEHEAQSN#ASLDVFLGHTNVEELM#KL](#)  
[Spectrum\\_00170\\_H0YFH3\\_KEHEAQSN#ASLDVFLGHTNVEELMKL](#)  
[Spectrum\\_00171\\_H0YFH3\\_KEHEAQSN#ASLDVFLGHTN#VEELMKL](#)  
[Spectrum\\_00172\\_H7C4N8\\_RKEN#SSEICSNNGECVCGQCVCRK](#)  
[Spectrum\\_00173\\_I3L4N7\\_KVTQN#LTLIEESLTSEFIHDIDRE](#)  
[Spectrum\\_00174\\_J3KN47\\_KILRQQHFLFGSN#VTDCSGNFCLFRS](#)  
[Spectrum\\_00175\\_J3KN47\\_KIMNGEADAMSLDGGFVYIAGKCGLVPVLAENYN#KS](#)  
[Spectrum\\_00176\\_J3KN47\\_RQQQHFLFGSN#VTDCSGNFCLFRS](#)  
[Spectrum\\_00177\\_J3KN47\\_KILRO#QQHFLFGSN#VTDCSGNFCLFRS](#)  
[Spectrum\\_00178\\_J3KN47\\_RQQQ#HLFGSN#VTDCSGNFCLFRS](#)  
[Spectrum\\_00179\\_J3KN47\\_KILRQQHFLFGSN#VTDCSGN#FCLFRS](#)  
[Spectrum\\_00180\\_J3KN47\\_KILRQQHFLFGSNVTDCSGN#FCLFRS](#)  
[Spectrum\\_00181\\_J3KN47\\_RQQQHFLFGSN#VTDCSGN#FCLFRS](#)  
[Spectrum\\_00182\\_J3KN47\\_RQQQHFLFGSNVTDCSGN#FCLFRS](#)  
[Spectrum\\_00183\\_J3KN47\\_KCGLVPVLAENYN#KS](#)  
[Spectrum\\_00184\\_J3KN47\\_RQQ#QHFLFGSN#VTDCSGNFCLFRS](#)  
[Spectrum\\_00185\\_J3KN47\\_KLCMGSGLN#LCEPNNKE](#)  
[Spectrum\\_00186\\_J3KN47\\_RQQQ#HLFGSNVTDCSGN#FCLFRS](#)  
[Spectrum\\_00187\\_J3KPA1\\_RDSCKASCN#CSNSIY-](#)  
[Spectrum\\_00188\\_J3KRP0\\_RLVPHMN#VSAVEKQ](#)  
[Spectrum\\_00189\\_J3KRP0\\_RLVPHM#N#VSAVEKQ](#)  
[Spectrum\\_00190\\_J3QOX6\\_KAAPAQEATATFN#STADRE](#)  
[Spectrum\\_00191\\_K7EKF6\\_RATPEAAN#ASELAALRM](#)  
[Spectrum\\_00192\\_K7EKF6\\_RVLN#ASAEAORA](#)  
[Spectrum\\_00193\\_K7EMC3\\_KELLETVVN#RTRD](#)  
[Spectrum\\_00194\\_M0R009\\_REGDHEFLEVPEAQEDVEATEFPVHQPGR#YSCSYRT](#)  
[Spectrum\\_00195\\_M0R009\\_RREGDHEFLEVPEAQEDVEATEFPVHQPGR#YSCSYRT](#)  
[Spectrum\\_00196\\_M0R009\\_REGDHEFLEVPEAQEDVEATEFPVHQ#PGN#YSCSYRT](#)  
[Spectrum\\_00197\\_O00187\\_KVVINSN#ITPICLPRK](#)  
[Spectrum\\_00198\\_O75882\\_KISN#SSDTVECECSENWKG](#)  
[Spectrum\\_00199\\_O75882\\_RGCSCESDWQGGPGCSVPVPAN#QSFWTRE](#)  
[Spectrum\\_00200\\_O75882\\_KIDSTGN#VTNELRV](#)  
[Spectrum\\_00201\\_O75882\\_KM#PSQAPTGNFYPOPLL#SSM#CLEDSRY](#)  
[Spectrum\\_00202\\_O75882\\_KGPVKMPSQAPTGNFYPOPLL#SSM#CLEDSRY](#)  
[Spectrum\\_00203\\_O75882\\_KCEN#LTTGKHCETCISGFYGDPTNGGKC](#)  
[Spectrum\\_00204\\_O75882\\_KCIN#QSICEKC](#)  
[Spectrum\\_00205\\_O75882\\_KAATCINPLN#GSVCERPAN#HSAKQ](#)  
[Spectrum\\_00206\\_O75882\\_RGICN#SSDVRG](#)  
[Spectrum\\_00207\\_P00738\\_KMVSHHN#LTTGATLINEQWLLTTAKNLFN#HSEN#ATAKD](#)  
[Spectrum\\_00208\\_P00738\\_KMVSHHN#LTTGATLIN#EQWLLTTAKNLFN#HSEN#ATAKD](#)  
[Spectrum\\_00209\\_P00738\\_KM#VSHHN#LTTGATLINEQWLLTTAKNLFN#HSEN#ATAKD](#)  
[Spectrum\\_00210\\_P00738\\_KM#VSHHN#LTTGATLINEQWLLTTAKNLFN#HSEN#ATAKD](#)  
[Spectrum\\_00211\\_P00738\\_KM#VSHHN#LTTGATLINEQWLLTTAKN#LFLN#HSEN#ATAKD](#)  
[Spectrum\\_00212\\_P00738\\_KMVSHHN#LTTGATLIN#EQ#WLLTTAKNLFN#HSEN#ATAKD](#)  
[Spectrum\\_00213\\_P00738\\_KMVSHHN#LTTGATLINEQ#WLLTTAKNLFN#HSEN#ATAKD](#)  
[Spectrum\\_00214\\_P00738\\_KM#VSHHN#LTTGATLIN#EQWLLTTAKN#LFLN#HSEN#ATAKD](#)  
[Spectrum\\_00215\\_P00738\\_KMVSHHN#LTTGATLINEQ#WLLTTAKNLFN#HSEN#ATAKD](#)  
[Spectrum\\_00216\\_P00738\\_KM#VSHHN#LTTGATLINEQWLLTTAKN](#)  
[Spectrum\\_00217\\_P00738\\_KMVSHHN#LTTGATLINEQWLLTTAKNLFN#HSEN#ATAKD](#)  
[Spectrum\\_00218\\_P00738\\_KM#VSHHN#LTTGATLINEQWLLTTAKN#LFLN#HSEN#ATAKD](#)  
[Spectrum\\_00219\\_P00738\\_KM#VSHHN#LTTGATLINEQ#WLLTTAKN#LFLN#HSEN#ATAKD](#)



[Spectrum\\_00220\\_P00738\\_KMVSHHNLTGATLIN#EQWLLTTAKNLFNLHSEN#ATAKD](#)  
[Spectrum\\_00221\\_P00738\\_KMVSHHNLTGATLINEQWLLTTAKNLFNLHSEN#ATAKD](#)  
[Spectrum\\_00222\\_P00738\\_KM#VSHHN#LTTGATLINEQWLLTTAKNLFNLHSEN#ATAKD](#)  
[Spectrum\\_00223\\_P00738\\_KM#VSHHNLTGATLIN#EQWLLTTAKNLFNLHSEN#ATAKD](#)  
[Spectrum\\_00224\\_P00738\\_KMVSHHN#LTTGATLINEQWLLTTAKN](#)  
[Spectrum\\_00225\\_P00738\\_KMVSHHNLTGATLINEQ#WLLTTAKN#LFLN#HSENATAKD](#)  
[Spectrum\\_00226\\_P00738\\_KMVSHHNLTGATLINEQWLLTTAKN#LFLN#HSEN#ATAKD](#)  
[Spectrum\\_00227\\_P00738\\_KM#VSHHN#LTTGATLIN#EQWLLTTAKNLFNLHSEN#ATAKD](#)  
[Spectrum\\_00228\\_P00738\\_KMVSHHNLTGATLINEQWLLTTAKN#LFLN#HSENATAKD](#)  
[Spectrum\\_00229\\_P00738\\_KM#VSHHNLTGATLINEQ#WLLTTAKN#LFLN#HSEN#ATAKD](#)  
[Spectrum\\_00230\\_P00738\\_KMVSHHNLTGATLINEQWLLTTAKNLFNLHSENATAKD](#)  
[Spectrum\\_00231\\_P00738\\_KM#VSHHN#LTTGATLINEQ#WLLTTAKNLFNLHSEN#ATAKD](#)  
[Spectrum\\_00232\\_P00738\\_KMVSHHN#LTTGATLINEQWLLTTAKNLFNLHSENATAKD](#)  
[Spectrum\\_00233\\_P00738\\_KM#VSHHN#LTTGATLINEQWLLTTAKN#LFLN#HSEN#ATAKD](#)  
[Spectrum\\_00234\\_P00738\\_KVVLHPN#YSQVDIGLIKQ](#)  
[Spectrum\\_00235\\_P00738\\_KNLFNL#HSEN#ATAKD](#)  
[Spectrum\\_00236\\_P00738\\_KM#VSHHNLTGATLINEQWLLTTAKNLFNLHSEN#ATAKD](#)  
[Spectrum\\_00237\\_P00738\\_KMVSHHNLTGATLINEQWLLTTAKNLFNLHSEN#ATAKD](#)  
[Spectrum\\_00238\\_P00738\\_KGSEPWQ#AKM#VSHHN#LTTGATLINEQWLLTTAKNLFNLHSEN#ATAKD](#)  
[Spectrum\\_00239\\_P00738\\_KM#VSHHNLTGATLINEQ#WLLTTAKNLFNLHSEN#ATAKD](#)  
[Spectrum\\_00240\\_P00738\\_KM#VSHHN#LTTGATLINEQ#WLLTTAKN#LFLN#HSEN#ATAKD](#)  
[Spectrum\\_00241\\_P00738\\_KM#VSHHN#LTTGATLINEQWLLTTAKN#LFLN#HSENATAKD](#)  
[Spectrum\\_00242\\_P00738\\_KVVLHPN#YSQVDIGLIK](#)  
[Spectrum\\_00243\\_P00738\\_KMVSHHN#LTTGATLINEQ#WLLTTAKNLFNLHSENATAKD](#)  
[Spectrum\\_00244\\_P00738\\_KN#LFLN#HSEN#ATAKD](#)  
[Spectrum\\_00245\\_P00738\\_KNLFNL#HSENATAKD](#)  
[Spectrum\\_00246\\_P00738\\_KNLFNL#HSEN#ATAKDIAPTLTLYVGKKQ](#)  
[Spectrum\\_00247\\_P00738\\_KVVLHPN#YSQ#VDIGLIK](#)  
[Spectrum\\_00248\\_P00738\\_KMVSHHN#LTTGATLINEQWLLTTAKN#LFLN#HSEN#ATAKD](#)  
[Spectrum\\_00249\\_P00738\\_KM#VSHHN#LTTGATLINEQWLLTTAKNLFNLHSENATAKD](#)  
[Spectrum\\_00250\\_P00738\\_KNLFNL#HSEN#ATAKDIAPTLTLYVGKK](#)  
[Spectrum\\_00251\\_P00738\\_KMVSHHN#LTTGATLINEQWLLTTAKNLFNLHSENATAKD](#)  
[Spectrum\\_00252\\_P00738\\_KNLFNLHSEN#ATAKDIAPTLTLYVGKKQ](#)  
[Spectrum\\_00253\\_P00738\\_KN#LFLN#HSEN#ATAKDIAPTLTLYVGKKQ](#)  
[Spectrum\\_00254\\_P00738\\_KQLVEIEKVVLHPN#YSQVDIGLIK](#)  
[Spectrum\\_00255\\_P00738\\_KNLFNLHSEN#ATAKD](#)  
[Spectrum\\_00256\\_P00738\\_KGSEPWQAKM#VSHHNLTGATLINEQWLLTTAKN#LFLN#HSEN#ATAKD](#)  
[Spectrum\\_00257\\_P00738\\_KM#VSHHNLTGATLINEQWLLTTAKN#LFLN#HSENATAKD](#)  
[Spectrum\\_00258\\_P00738\\_KM#VSHHN#LTTGATLIN#EQWLLTTAKNLFNLHSEN#ATAKD](#)  
[Spectrum\\_00259\\_P00738\\_KNLFNL#HSENATAKDIAPTLTLYVGKKQ](#)  
[Spectrum\\_00260\\_P00738\\_KN#LFLN#HSEN#ATAKD](#)  
[Spectrum\\_00261\\_P00738\\_KN#LFLN#HSENATAKDIAPTLTLYVGKK](#)  
[Spectrum\\_00262\\_P00738\\_KM#VSHHN#LTTGATLINEQ#WLLTTAKN](#)  
[Spectrum\\_00263\\_P00738\\_KM#VSHHN#LTTGATLIN#EQWLLTTAKN](#)  
[Spectrum\\_00264\\_P00738\\_KGSEPWQ#AKM#VSHHNLTGATLINEQWLLTTAKNLFNLHSEN#ATAKD](#)  
[Spectrum\\_00265\\_P00738\\_KN#LFLN#HSENATAKDIAPTLTLYVGKKQ](#)  
[Spectrum\\_00266\\_P00738\\_KVVLHPN#YSQVDIGLIKQKV](#)  
[Spectrum\\_00267\\_P00738\\_KM#VSHHN#LTTGATLINEQWLLTTAKNLFNLHSENATAKD](#)  
[Spectrum\\_00268\\_P00738\\_KM#VSHHN#LTTGATLIN#EQ#WLLTTAKNLFNLHSENATAKD](#)  
[Spectrum\\_00269\\_P00738\\_KN#LFLN#HSEN#ATAKDIAPTLTLYVGKKQ](#)  
[Spectrum\\_00270\\_P00738\\_KM#VSHHN#LTTGATLINEQ#WLLTTAKNLFNLHSENATAKD](#)  
[Spectrum\\_00271\\_P00738\\_KMVSHHN#LTTGATLIN#EQWLLTTAKN](#)  
[Spectrum\\_00272\\_P00738\\_KQLVEIEKVVLHPN#YSQVDIGLIK](#)  
[Spectrum\\_00273\\_P00738\\_KQLVEIEKVVLHPN#YSQVDIGLIKQ](#)  
[Spectrum\\_00274\\_P00738\\_KM#VSHHNLTGATLIN#EQ#WLLTTAKN#LFLN#HSEN#ATAKD](#)  
[Spectrum\\_00275\\_P00738\\_KMVSHHN#LTTGATLINEQ#WLLTTAKN](#)  
[Spectrum\\_00276\\_P00739\\_KMVSHHNLTGATLINEQWLLTTAKN#LFLN#HSEN#ATAKD](#)

[Spectrum\\_00277\\_P00748\\_RRN#HSCEPCQTLAVRS](#)  
[Spectrum\\_00278\\_P00748\\_RTTLGAPCQPWASEATYRN#VTAEQARN](#)  
[Spectrum\\_00279\\_P01008\\_KLGACN#DTLOQLM#EVFKF](#)  
[Spectrum\\_00280\\_P01008\\_KLGACN#DTLOQLMEVFKF](#)  
[Spectrum\\_00281\\_P01008\\_KLGACN#DTLOQ#LM#EVFKF](#)  
[Spectrum\\_00282\\_P01008\\_KLGACN#DTLO#QLM#EVFKF](#)  
[Spectrum\\_00283\\_P01008\\_KLGACN#DTLOQLMEVFKFDTISEKT](#)  
[Spectrum\\_00284\\_P01008\\_RAAINKWVSN#KTEGRI](#)  
[Spectrum\\_00285\\_P01008\\_KSLTFN#ETYQDISELVYGAKL](#)  
[Spectrum\\_00286\\_P01008\\_KLGACN#DTLOQLM#EVFKFDTISEKT](#)  
[Spectrum\\_00287\\_P01008\\_RLFGDKSLTFN#ETYQDISELVYGAKL](#)  
[Spectrum\\_00288\\_P01009\\_KYLG#ATAIFFLPDEGKL](#)  
[Spectrum\\_00289\\_P01009\\_RQLAHOSN#STNIFFSPVSIATAFAMLSLGTKA](#)  
[Spectrum\\_00290\\_P01009\\_KADTHDEILEGLNFN#LTEIPEAQ#IHEGFQELLRT](#)  
[Spectrum\\_00291\\_P01009\\_KADTHDEILEGLNFN#LTEIPEAQIHEGFQELLRT](#)  
[Spectrum\\_00292\\_P01009\\_KYLG#ATAIFFLPDEGKLOHLENELTHDIITKE](#)  
[Spectrum\\_00293\\_P01023\\_RGNEANYYSN#ATTDEHGLVQFSIN#TTNVMGTSLTVRV](#)  
[Spectrum\\_00294\\_P01023\\_RGNEANYYSNATTDEHGLVQ#FSIN#TTNVMGTSLTVRV](#)  
[Spectrum\\_00295\\_P01023\\_RGNEANYYSNATTDEHGLVQFSIN#TTNVMGTSLTVRV](#)  
[Spectrum\\_00296\\_P01023\\_RGNEANYYSN#ATTDEHGLVQFSINTTN#VMGTSLTVRV](#)  
[Spectrum\\_00297\\_P01023\\_KSLGNVN#FTVSAEALESQELCGTEVPSVPEHGRKD](#)  
[Spectrum\\_00298\\_P01023\\_KVSN#QTLSEFTVLQDVPVRD](#)  
[Spectrum\\_00299\\_P01024\\_KTVLTPATNHMGN#VTFTIPANRE](#)  
[Spectrum\\_00300\\_P01042\\_RITYSIVQTN#CSKE](#)  
[Spectrum\\_00301\\_P01042\\_KLNAENN#ATFYFKI](#)  
[Spectrum\\_00302\\_P01042\\_KYNSQN#QSNNQFVLYRI](#)  
[Spectrum\\_00303\\_P01042\\_RHGIOYFNN#NTQHSSLFMLNEVKRA](#)  
[Spectrum\\_00304\\_P01042\\_RDIPTNSPELEETLHTITIKLNAENN#ATFYFKI](#)  
[Spectrum\\_00305\\_P01042\\_KLNAENN#ATFYFKIDNVKKA](#)  
[Spectrum\\_00306\\_P01042\\_RITYSIVQ#TN#CSKE](#)  
[Spectrum\\_00307\\_P01042\\_RHGIOYFNN#NTQHSSLFM#LNEVKRA](#)  
[Spectrum\\_00308\\_P01042\\_KLNAEN#N#ATFYFKI](#)  
[Spectrum\\_00309\\_P01042\\_RHGIOYFNN#NTQHSSLFM#LNEVKR](#)  
[Spectrum\\_00310\\_P01042\\_KLN#AENN#ATFYFKI](#)  
[Spectrum\\_00311\\_P01042\\_RHGIOYFNN#NTQHSSLFMLNEVKR](#)  
[Spectrum\\_00312\\_P01042\\_RITYSIVQTN#CSKENFLFLTPDCKS](#)  
[Spectrum\\_00313\\_P01042\\_KLNAENN#ATFYFKIDNVKK](#)  
[Spectrum\\_00314\\_P01042\\_KKYNQN#QSNNQFVLYRI](#)  
[Spectrum\\_00315\\_P01833\\_KYAGRAN#LTNFPENGTFVFNIAQLSQDDSGRY](#)  
[Spectrum\\_00316\\_P01833\\_RANLTN#FPEN#GTFVFNIAQLSQDDSGRY](#)  
[Spectrum\\_00317\\_P01857\\_REEQYN#STYRV](#)  
[Spectrum\\_00318\\_P01859\\_REEQFN#STFRV](#)  
[Spectrum\\_00319\\_P01860\\_REEQYN#STFRV](#)  
[Spectrum\\_00320\\_P01861\\_REEQFN#STYRV](#)  
[Spectrum\\_00321\\_P01871\\_RGLTFQON#ASSMCVDPQDTAIRV](#)  
[Spectrum\\_00322\\_P01871\\_RGLTFQON#ASSM#CVPDQDTAIRV](#)  
[Spectrum\\_00323\\_P01871\\_RVDHRGLTFQON#ASSMCVDPDQDTAIRV](#)  
[Spectrum\\_00324\\_P01871\\_RTVDKSTGKPTLYN#VSLVMSDTAGTCY-](#)  
[Spectrum\\_00325\\_P01871\\_RGLTFQON#ASSM#CVPDQ#DTAIRV](#)  
[Spectrum\\_00326\\_P01871\\_RTVDKSTGKPTLYN#VSLVM#SDTAGTCY-](#)  
[Spectrum\\_00327\\_P01871\\_RGLTFQON#N#ASSM#CVPDQDTAIRV](#)  
[Spectrum\\_00328\\_P01871\\_RGLTFQON#ASSMCVDPQ#DTAIRV](#)  
[Spectrum\\_00329\\_P01871\\_KTHTNISESHPN#ATFSAVGEASICEDDWNNGERF](#)  
[Spectrum\\_00330\\_P01876\\_RLSLHRPALEDLLLGSEAN#LTCTLTGLRD](#)  
[Spectrum\\_00331\\_P01876\\_RLAGKPTHVN#VSVVMAEVDGTCY-](#)  
[Spectrum\\_00332\\_P01876\\_RLAGKPTHVN#VSVVM#AEVDGTCY-](#)  
[Spectrum\\_00333\\_P01876\\_KTIDRLAGKPTHVN#VSVVM#AEVDGTCY-](#)

[Spectrum\\_00334\\_P01876\\_RLSLHRPALEDLLLGSEAN#LTCTLTGLRDASGVTFWTWTPSSGKS](#)  
[Spectrum\\_00335\\_P01876\\_KTIDRLAGKPTHVN#VSVVMAEVDGTCY-](#)  
[Spectrum\\_00336\\_P01877\\_KTPLTAN#ITKS](#)  
[Spectrum\\_00337\\_P02671\\_RMDGSLNFN#RT](#)  
[Spectrum\\_00338\\_P02675\\_RGTAGNALMDGASQLM#GEN#RT](#)  
[Spectrum\\_00339\\_P02675\\_RGTAGNALMDGASQLMGEN#RT](#)  
[Spectrum\\_00340\\_P02675\\_RGTAGNALM#DGASQLM#GEN#RT](#)  
[Spectrum\\_00341\\_P02675\\_RGTAGNALM#DGASQLMGEN#RT](#)  
[Spectrum\\_00342\\_P02675\\_RGTAGNALM#DGASQ#LM#GEN#RT](#)  
[Spectrum\\_00343\\_P02675\\_KYRGTAGNALMDGASQLMGEN#RT](#)  
[Spectrum\\_00344\\_P02675\\_KYRGTAGNALM#DGASQLM#GEN#RT](#)  
[Spectrum\\_00345\\_P02745\\_RRNPPM#GGNVVIFDTVITNQEEPYQN#HSGRF](#)  
[Spectrum\\_00346\\_P02745\\_RRNPPMGGNVVIFDTVITNQEEPYQN#HSGRF](#)  
[Spectrum\\_00347\\_P02745\\_RNPPM#GGNVVIFDTVITNQEEPYQN#HSGRF](#)  
[Spectrum\\_00348\\_P02748\\_RAVN#ITSENLI DDVVSLIRG](#)  
[Spectrum\\_00349\\_P02748\\_RCNVDN#DCGDFSEDEDDCESEPRPPCRD](#)  
[Spectrum\\_00350\\_P02748\\_RAVN#ITSENLI DDVVSLIRGGTRK](#)  
[Spectrum\\_00351\\_P02749\\_RVYKPSAGN#NSLYRD](#)  
[Spectrum\\_00352\\_P02749\\_RDTAVFECLPQHAMEFGN#DTITCTTHGN#WTKLPECRE](#)  
[Spectrum\\_00353\\_P02749\\_RDTAVFECLPQHAMEFGN#DTITCTTHGN#WTKLPECRE](#)  
[Spectrum\\_00354\\_P02749\\_RDTAVFECLPQHAMEFGN#DTITCTTHGN#WTKL](#)  
[Spectrum\\_00355\\_P02749\\_RDTAVFECLPQHAMEFGN#DTITCTTHGN#WTKLPECRE](#)  
[Spectrum\\_00356\\_P02749\\_RDTAVFECLPQHAMEFGN#DTITCTTHGN#WTKLPECRE](#)  
[Spectrum\\_00357\\_P02749\\_KLGN#WSAMPSCKA](#)  
[Spectrum\\_00358\\_P02749\\_RDTAVFECLPQHAMEFGN#DTITCTTHGN#WTKLPECRE](#)  
[Spectrum\\_00359\\_P02749\\_KLGN#WSAMPSCKA](#)  
[Spectrum\\_00360\\_P02749\\_RDTAVFECLPQHAMEFGN#DTITCTTHGN#WTKLPECRE](#)  
[Spectrum\\_00361\\_P02749\\_RDTAVFECLPQHAMEFGN#DTITCTTHGN#WTKL](#)  
[Spectrum\\_00362\\_P02749\\_RDTAVFECLPQHAMEFGN#DTITCTTHGN#WTKLPECRE](#)  
[Spectrum\\_00363\\_P02750\\_KLPPGLLAN#FTLLRT](#)  
[Spectrum\\_00364\\_P02750\\_RKLPPGLLAN#FTLLRT](#)  
[Spectrum\\_00365\\_P02750\\_RSDHGSSISCOPPAEIPGYLPADTVHLAVEFFN#LTHLPANLLOGASKL](#)  
[Spectrum\\_00366\\_P02750\\_RLRKLPPGLLAN#FTLLRT](#)  
[Spectrum\\_00367\\_P02760\\_RYFYN#GTSM#ACETFQYGGCM#GNGNNEFVTEKE](#)  
[Spectrum\\_00368\\_P02760\\_RYFYN#GTSM#ACETFQYGGCM#GNGNNEFVTEKE](#)  
[Spectrum\\_00369\\_P02760\\_RYFYN#GTSM#ACETFQYGGCM#GNGNNEFVTEKE](#)  
[Spectrum\\_00370\\_P02760\\_RYFYN#GTSM#ACETFQYGGCM#GNGNNEFVTEKE](#)  
[Spectrum\\_00371\\_P02760\\_RYFYN#GTSM#ACETFQ#YGGCM#GNGNNEFVTEKE](#)  
[Spectrum\\_00372\\_P02760\\_RYFYN#GTSM#ACETFQ#YGGCM#GNGNNEFVTEKE](#)  
[Spectrum\\_00373\\_P02763\\_RQDQCIYN#TTYLNVQRE](#)  
[Spectrum\\_00374\\_P02763\\_RQDQ#CIYN#TTYLNVQRE](#)  
[Spectrum\\_00375\\_P02763\\_REYQTRQDQCIYN#TTYLNVQRE](#)  
[Spectrum\\_00376\\_P02763\\_RQDQCIYN#TTYLNVQREN#GTISRY](#)  
[Spectrum\\_00377\\_P02763\\_RQDQCIYN#TTYLN#VQRENGTISRY](#)  
[Spectrum\\_00378\\_P02763\\_REYQTRQDQCIYN#TTYLN#VQRENGTISRY](#)  
[Spectrum\\_00379\\_P02763\\_RQDQCIYNTTYLNVQ#REN#GTISRY](#)  
[Spectrum\\_00380\\_P02763\\_RQDQCIYNTTYLNVQREN#GTISRY](#)  
[Spectrum\\_00381\\_P02768\\_KOEPERN#ECFLOHKDDNPPLRL](#)  
[Spectrum\\_00382\\_P02768\\_RN#ECFLOHKDDNPPLRL](#)  
[Spectrum\\_00383\\_P02790\\_KALPOPQN#VTSLLGCTH-](#)  
[Spectrum\\_00384\\_P02790\\_KALPOPQN#VTSLLGCTH-](#)  
[Spectrum\\_00385\\_P02790\\_KALPO#PQN#VTSLLGCTH-](#)  
[Spectrum\\_00386\\_P02790\\_RSWPAVGN#CSSALRW](#)  
[Spectrum\\_00387\\_P02790\\_KERSWPAVGN#CSSALRW](#)  
[Spectrum\\_00388\\_P02790\\_KALPO#PQN#VTSLLGCTH-](#)  
[Spectrum\\_00389\\_P02790\\_RN#GTGHGN#STHHGPEYMRC](#)  
[Spectrum\\_00390\\_P02790\\_RN#GTGHGN#STHHGPEYM#RC](#)

[Spectrum\\_00391\\_P03951\\_RVYSGILN#QSEIKE](#)  
[Spectrum\\_00392\\_P03951\\_KLETTVN#YTDSQRPICLPSKG](#)  
[Spectrum\\_00393\\_P03951\\_KGINYN#SSVAKS](#)  
[Spectrum\\_00394\\_P03951\\_KLETTVN#YTDSQRPICLPSKGDRN](#)  
[Spectrum\\_00395\\_P03951\\_KDSVTETLPRVN#RT](#)  
[Spectrum\\_00396\\_P04003\\_RLSVDKDQYVEPEN#VTIQCDSDGYGVVGPQSITCSGN#RT](#)  
[Spectrum\\_00397\\_P04003\\_RLSVDKDQYVEPEN#VTIQ#CDSGYGVVGPQSITCSGNRT](#)  
[Spectrum\\_00398\\_P04003\\_RLSVDKDQ#YVEPENVTIQCDSDGYGVVGPQSITCSGN#RT](#)  
[Spectrum\\_00399\\_P04003\\_RLSVDKDQYVEPENVTIQCDSDGYGVVGPQ#SITCSGN#RTWYPEVPKC](#)  
[Spectrum\\_00400\\_P04003\\_RLSVDKDQYVEPENVTIQCDSDGYGVVGPQ#SITCSGN#RT](#)  
[Spectrum\\_00401\\_P04003\\_KDQYVEPEN#VTIQCDSDGYGVVGPQSITCSGN#RT](#)  
[Spectrum\\_00402\\_P04003\\_RLSVDKDQYVEPEN#VTIQCDSDGYGVVGPQSITCSGNRT](#)  
[Spectrum\\_00403\\_P04003\\_RLSVDKDQYVEPENVTIQCDSDGYGVVGPQSITCSGN#RT](#)  
[Spectrum\\_00404\\_P04003\\_KDQYVEPEN#VTIQCDSDGYGVVGPQSITCSGNRT](#)  
[Spectrum\\_00405\\_P04003\\_RFLLGHASISCTVEN#ETIGVWRPSPPTCEKI](#)  
[Spectrum\\_00406\\_P04003\\_RLSVDKDQYVEPEN#VTIQCDSDGYGVVGPQ#SITCSGN#RT](#)  
[Spectrum\\_00407\\_P04003\\_RLSVDKDQ#YVEPEN#VTIQCDSDGYGVVGPQSITCSGN#RT](#)  
[Spectrum\\_00408\\_P04004\\_KNN#ATVHEQVGGPSLTSDLQAQSKG](#)  
[Spectrum\\_00409\\_P04004\\_KNN#ATVHEQVGGPSLTSDLQ#AQSKG](#)  
[Spectrum\\_00410\\_P04004\\_RFEDGVLDPDYPRN#ISDGFEDGIPDNVDAALALPAHSYSGRE](#)  
[Spectrum\\_00411\\_P04004\\_KN#N#ATVHEQVGGPSLTSDLQAQSKG](#)  
[Spectrum\\_00412\\_P04004\\_KNN#ATVHEQ#VGGPSLTSDLQAQSKG](#)  
[Spectrum\\_00413\\_P04004\\_RN#ISDGFEDGIPDNVDAALALPAHSYSGRE](#)  
[Spectrum\\_00414\\_P04114\\_RFEVDSPVYN#ATWSASLKN](#)  
[Spectrum\\_00415\\_P04114\\_KQVFPLNYCTSGAYS#ASSTDSASYPLTGDTRL](#)  
[Spectrum\\_00416\\_P04114\\_RVNQNLVYESGSLN#FSKL](#)  
[Spectrum\\_00417\\_P04114\\_RNNALDFVTKSYN#ETKI](#)  
[Spectrum\\_00418\\_P04114\\_KQVFPLN#YCTSGAYS#ASSTDSASYPLTGDTRL](#)  
[Spectrum\\_00419\\_P04180\\_KAELSN#HTRPVILVPGCLGNQLEAKL](#)  
[Spectrum\\_00420\\_P04196\\_RVIDFN#CTTSSVSSALANTKD](#)  
[Spectrum\\_00421\\_P04196\\_RVIDFN#CTTSSVSSALAN#TKD](#)  
[Spectrum\\_00422\\_P04275\\_KGQVYLOCGTPCN#LTCRS](#)  
[Spectrum\\_00423\\_P04275\\_RASPPSSCN#ISSGEM#QKG](#)  
[Spectrum\\_00424\\_P04275\\_RASPPSSCN#ISSGEMQKG](#)  
[Spectrum\\_00425\\_P05160\\_KHGVIISSTVDTYEN#GSSVEYRC](#)  
[Spectrum\\_00426\\_P05362\\_RLNPTVITYGN#DSFSAKA](#)  
[Spectrum\\_00427\\_P05362\\_RAN#LTVVLLRG](#)  
[Spectrum\\_00428\\_P05543\\_KTLYETEVEFSTDFSN#ISAAKQ](#)  
[Spectrum\\_00429\\_P05543\\_KVTACHSSQPN#ATLYKM](#)  
[Spectrum\\_00430\\_P05546\\_KGGETAQADPQWEQLNKN#LSMPLLPAADFHKE](#)  
[Spectrum\\_00431\\_P05546\\_KGGETAQADPQWEQLN#NKN#LSMPLLPAADFHKE](#)  
[Spectrum\\_00432\\_P05546\\_KGGETAQADPQWEQLNKN#LSM#PLLPAADFHKE](#)  
[Spectrum\\_00433\\_P05546\\_KGGETAQADPQWEQ#LNNKN#LSM#PLLPAADFHKE](#)  
[Spectrum\\_00434\\_P05546\\_KGGETAQADPQ#WEQLNKN#LSMPLLPAADFHKE](#)  
[Spectrum\\_00435\\_P05546\\_KGGETAQADPQWEQ#LNNKN#LSMPLLPAADFHKE](#)  
[Spectrum\\_00436\\_P05546\\_KGGETAQADPQWEQLN#KN#LSMPLLPAADFHKE](#)  
[Spectrum\\_00437\\_P05546\\_KDFVN#ASSKYEITTIHNLFRK](#)  
[Spectrum\\_00438\\_P07357\\_RAATPAAVTCQLSN#WSEWTDPCFQDKKY](#)  
[Spectrum\\_00439\\_P07357\\_RVRGGSSGWSGGLAQN#RS](#)  
[Spectrum\\_00440\\_P07357\\_RGGSSGWSGGLAQN#RS](#)  
[Spectrum\\_00441\\_P07357\\_RVRGGSSGWSGGLAQN#RSTITYRS](#)  
[Spectrum\\_00442\\_P07996\\_KVVN#STTGPGHELRN](#)  
[Spectrum\\_00443\\_P07996\\_KKVSCPIM#PCSN#ATVPDGECCPRC](#)  
[Spectrum\\_00444\\_P08603\\_KM#DGASN#VTCINSRW](#)  
[Spectrum\\_00445\\_P08603\\_KMDGASN#VTCINSRW](#)  
[Spectrum\\_00446\\_P08603\\_KIPCSQPPQIEHGTIN#SSRS](#)  
[Spectrum\\_00447\\_P08603\\_RWDPEVNCSMAQIQLCPPPPQIPN#SHN#MTTTLNYRD](#)



[Spectrum\\_00448\\_P08603\\_RWDPEVNCSM#AQIQLCPPPPQIPN#SHN#M#TTTLNYRD](#)  
[Spectrum\\_00449\\_P08603\\_RISEEN#ETTCYMGKW](#)  
[Spectrum\\_00450\\_P08603\\_RISEEN#ETTCYM#GKW](#)  
[Spectrum\\_00451\\_P08603\\_RWDPEVNCSM#AQIQLCPPPPQIPNSHN#M#TTTLNYRD](#)  
[Spectrum\\_00452\\_P08603\\_RWDPEVN#CSM#AQIQLCPPPPQIPNSHN#M#TTTLNYRD](#)  
[Spectrum\\_00453\\_P08603\\_RWDPEVNCSM#AQIQLCPPPPQIPNSHN#MTTTLNYRD](#)  
[Spectrum\\_00454\\_P08603\\_RISEEN#ETTCYM#GKWSSPPQCEGLPCKS](#)  
[Spectrum\\_00455\\_P08603\\_KAGEQVITYTCATYYKM#DGASN#VTCINSRW](#)  
[Spectrum\\_00456\\_P08603\\_RWDPEVNCSMAQIQLCPPPPQIPNSHN#M#TTTLNYRD](#)  
[Spectrum\\_00457\\_P08603\\_KIPCSQ#PPOIEHGTIN#SSRS](#)  
[Spectrum\\_00458\\_P08603\\_RWDPEVNCSMAQIQLCPPPPQIPN#SHN#M#TTTLNYRD](#)  
[Spectrum\\_00459\\_P08603\\_KSPDVIN#GSPISOKI](#)  
[Spectrum\\_00460\\_P08603\\_RWDPEVNCSM#AQIQLCPPPPQIPN#SHN#MTTTLNYRD](#)  
[Spectrum\\_00461\\_P08603\\_KAGEQVITYTCATYYKMDGASN#VTCINSRW](#)  
[Spectrum\\_00462\\_P08603\\_RWQSIPLCVEKIPCSQPPQIEHGTIN#SSRS](#)  
[Spectrum\\_00463\\_P08603\\_KIPCSQPPQ#IEHGTIN#SSRS](#)  
[Spectrum\\_00464\\_P08603\\_RSPYEMFGDEEVM#CLNGN#WTEPPQCKD](#)  
[Spectrum\\_00465\\_P08603\\_RWDPEVN#CSMAQIQLCPPPPQIPNSHN#MTTTLNYRD](#)  
[Spectrum\\_00466\\_P08603\\_KMDGASN#VTCIN#SRW](#)  
[Spectrum\\_00467\\_P08603\\_RWDPEVNCSMAQIQLCPPPPQIPNSHN#MTTTLNYRD](#)  
[Spectrum\\_00468\\_P08603\\_RWDPEVN#CSM#AQ#IQLCPPPPQIPNSHN#MTTTLNYRD](#)  
[Spectrum\\_00469\\_P0C0L4\\_RGLN#VTLSSSTGRN](#)  
[Spectrum\\_00470\\_P0C0L4\\_RFDGLESN#SSTQFEVKK](#)  
[Spectrum\\_00471\\_P0C0L4\\_RGLN#VTLSSSTGRN#GFKS](#)  
[Spectrum\\_00472\\_P10909\\_RLAN#LTQGEDQYYLRV](#)  
[Spectrum\\_00473\\_P10909\\_RLAN#LTQGEDQ#YYLRV](#)  
[Spectrum\\_00474\\_P10909\\_RLAN#LTO#GEDQYYLRV](#)  
[Spectrum\\_00475\\_P10909\\_KKEDALN#ETRE](#)  
[Spectrum\\_00476\\_P10909\\_KKEDALN#ETRE](#)  
[Spectrum\\_00477\\_P10909\\_KMLN#TSSLLEQLNEQFNWVSRL](#)  
[Spectrum\\_00478\\_P10909\\_KLKELPGVCN#ETM#M#ALWEECKPCLKQ](#)  
[Spectrum\\_00479\\_P10909\\_REIRHN#STGCLRM](#)  
[Spectrum\\_00480\\_P10909\\_KEDALN#ETRESETKL](#)  
[Spectrum\\_00481\\_P12259\\_KNSVLN#SSTAETHSSPYSEDPIEDPLOPDVTGIRL](#)  
[Spectrum\\_00482\\_P12259\\_KTWN#QSIARL](#)  
[Spectrum\\_00483\\_P12259\\_RTNIN#SSRDPDNIAAWYLR](#)  
[Spectrum\\_00484\\_P12259\\_RM#RPWKDPPSLLLLKQSN#SSKI](#)  
[Spectrum\\_00485\\_P12259\\_KTYEDDSPEWFKEDNAVQPN#SSYTYVWHATERS](#)  
[Spectrum\\_00486\\_P13671\\_KVLN#FTTKA](#)  
[Spectrum\\_00487\\_P14151\\_KIGGIWTWVGTN#KS](#)  
[Spectrum\\_00488\\_P14151\\_RFCRDN#YTDLVAIQNKA](#)  
[Spectrum\\_00489\\_P14151\\_RRRCRDN#YTDLVAIQNKA](#)  
[Spectrum\\_00490\\_P19652\\_RQNOCFYN#SSYLNVORE](#)  
[Spectrum\\_00491\\_P19652\\_RQNO#CFYN#SSYLNVORE](#)  
[Spectrum\\_00492\\_P19652\\_RQNOCFYN#SSYLNVO#REN#GTVSRY](#)  
[Spectrum\\_00493\\_P22792\\_RAFGSNPN#LTKV](#)  
[Spectrum\\_00494\\_P22792\\_KLYLGSNNLTALHPALFQN#LSKL](#)  
[Spectrum\\_00495\\_P22792\\_KLYLGSNN#LTALHPALFQN#LSKL](#)  
[Spectrum\\_00496\\_P27169\\_KVTQVYAEN#GTVLOGSTVASVYKG](#)  
[Spectrum\\_00497\\_P27169\\_KVTQVYAEN#GTVLOGSTVASVYKGKL](#)  
[Spectrum\\_00498\\_P27169\\_KHAN#WTLTPLKS](#)  
[Spectrum\\_00499\\_P29622\\_KFLN#DTMAVYEAKL](#)  
[Spectrum\\_00500\\_P29622\\_KDFYVDEN#TTVRV](#)  
[Spectrum\\_00501\\_P29622\\_RSQILEGLGFN#LTELSESDVHRG](#)  
[Spectrum\\_00502\\_P33151\\_REVYPWYN#LTVEAKE](#)  
[Spectrum\\_00503\\_P35542\\_RVYLOGLIDCYLFGN#SSTVLEDSKS](#)  
[Spectrum\\_00504\\_P35858\\_RFVQAICEGDDCOPPAYTYNN#ITCASPEVVGLDLRD](#)

[Spectrum\\_00505\\_P35858\\_RFVQAICEGDDCOPPAYTYN#N#ITCASPPPEVVGDLDRD](#)  
[Spectrum\\_00506\\_P43652\\_RYAEDKFN#ETTEKS](#)  
[Spectrum\\_00507\\_P43652\\_RDIENFN#STQKF](#)  
[Spectrum\\_00508\\_P43652\\_RIVQIYKDLLRN#CCNTENPPGCYRY](#)  
[Spectrum\\_00509\\_P43652\\_KDLLRN#CCNTENPPGCYRY](#)  
[Spectrum\\_00510\\_P51884\\_KLGSFEGLVN#LTFIHLQHNRL](#)  
[Spectrum\\_00511\\_P51884\\_KAFEN#VTDLQWLILDHNLENSKI](#)  
[Spectrum\\_00512\\_P51884\\_KLHINHNN#LTESVGPLPKS](#)  
[Spectrum\\_00513\\_P51884\\_KKLHINHNN#LTESVGPLPKS](#)  
[Spectrum\\_00514\\_P51884\\_KAFEN#VTDLQWLILDHNLENSKIKG](#)  
[Spectrum\\_00515\\_P80108\\_KNDFHRN#LTTSLTESVDRN](#)  
[Spectrum\\_00516\\_P80108\\_KLNVEAAN#WTVRG](#)  
[Spectrum\\_00517\\_P80108\\_KLGTSLSGSHVLMN#GTLKQ](#)  
[Spectrum\\_00518\\_P80108\\_RTLLLVGSPTWKN#ASRL](#)  
[Spectrum\\_00519\\_P80108\\_KEKLNVEAAN#WTVRG](#)  
[Spectrum\\_00520\\_P80108\\_RGEEDFSWFGYSLHGVTVDN#RT](#)  
[Spectrum\\_00521\\_P80108\\_KLGTSLSGSHVLM#N#GTLKQ](#)  
[Spectrum\\_00522\\_P80108\\_KFHVDSESTHWTPFLN#ASVHYIRE](#)  
[Spectrum\\_00523\\_Q02985\\_KLGYNAN#TSILSFQAVCRE](#)  
[Spectrum\\_00524\\_Q03591\\_RLQNNENN#ISCVERG](#)  
[Spectrum\\_00525\\_Q03591\\_RSPYEMFGDEEVMCLNGN#WTEPPQCKD](#)  
[Spectrum\\_00526\\_Q06033\\_KNAHGEEKEN#LTARA](#)  
[Spectrum\\_00527\\_Q06033\\_RKNAHGEEKEN#LTARA](#)  
[Spectrum\\_00528\\_Q07954\\_KLTSCATN#ASICGDEARC](#)  
[Spectrum\\_00529\\_Q08380\\_RALGFEN#ATQALGRA](#)  
[Spectrum\\_00530\\_Q08380\\_RALGFEN#ATQ#ALGRA](#)  
[Spectrum\\_00531\\_Q08380\\_RTVIRPFYLTN#SSGVD-](#)  
[Spectrum\\_00532\\_Q08380\\_RYKGLN#LTEDTYKPRI](#)  
[Spectrum\\_00533\\_Q13201\\_KFNPGAESVLSN#STLKF](#)  
[Spectrum\\_00534\\_Q13201\\_KTQAALSN#LTCCIDRS](#)  
[Spectrum\\_00535\\_Q13201\\_KLQN#LTLPTN#ASIKE](#)  
[Spectrum\\_00536\\_Q14624-2\\_KLPTQN#ITFQTESSVAEQEAEFQSPKY](#)  
[Spectrum\\_00537\\_Q14624-2\\_RGPDVLTATVSGKLPTQN#ITFQTESSVAEQEAEFQSPKY](#)  
[Spectrum\\_00538\\_Q14624-2\\_RGPDVLTATVSGKLPTQN#ITFQ#TESSVAEQEAEFQSPKY](#)  
[Spectrum\\_00539\\_Q14624-2\\_KAFITN#FSM#IIDGMTYPGIIKE](#)  
[Spectrum\\_00540\\_Q14624-2\\_KLPTQ#N#ITFQTESSVAEQEAEFQSPKY](#)  
[Spectrum\\_00541\\_Q14624-2\\_KAFITN#FSM#IIDGM#TYPGIIKE](#)  
[Spectrum\\_00542\\_Q15166\\_RVSTVYANN#GSVLQGTSVASVYHGKI](#)  
[Spectrum\\_00543\\_Q16609\\_RWEYCN#LTRC](#)  
[Spectrum\\_00544\\_Q5SRP5\\_KTELFSSSCPGGIMLN#ETGQGYQRF](#)  
[Spectrum\\_00545\\_Q5SRP5\\_KTELFSSSCPGGIM#LN#ETGQGYQRF](#)  
[Spectrum\\_00546\\_Q5SRP5\\_RTEGRPDM#KTELFSSSCPGGIM#LN#ETGQGYQRF](#)  
[Spectrum\\_00547\\_Q5T382\\_RSLEAIN#GSGLOMGLQRV](#)  
[Spectrum\\_00548\\_Q5T382\\_RSLEAIN#GSGLOM#GLQRV](#)  
[Spectrum\\_00549\\_Q5T985\\_KGAFISN#FSMTVDGKT](#)  
[Spectrum\\_00550\\_Q5T985\\_KGAFISN#FSM#TVDGKT](#)  
[Spectrum\\_00551\\_Q5T985\\_KGAFISN#FSM#TVDGKTFERS](#)  
[Spectrum\\_00552\\_Q5VVQ7\\_RLGHCPCDPVLVNGEFSSSGPVN#VSDKI](#)  
[Spectrum\\_00553\\_Q5VVQ7\\_KTLFCN#ASKEWDN#TTTECRL](#)  
[Spectrum\\_00554\\_Q5VVQ7\\_RLGHCPCDPVLVN#GEFSSSGPVN#VSDKI](#)  
[Spectrum\\_00555\\_Q5VVQ7\\_KTLFCNASKEWDN#TTTECRL](#)  
[Spectrum\\_00556\\_Q5VVQ7\\_KKTLFCN#ASKEWDN#TTTECRL](#)  
[Spectrum\\_00557\\_Q5VVQ7\\_KKTLFCNASKEWDN#TTTECRL](#)  
[Spectrum\\_00558\\_Q5VVQ7\\_KKTLFCN#ASKE](#)  
[Spectrum\\_00559\\_Q5VVQ7\\_KEWDN#TTTECRL](#)  
[Spectrum\\_00560\\_Q5VYL6\\_REQFCPPPPQIPNAQN#M#TTTVNYQDGEKV](#)  
[Spectrum\\_00561\\_Q6UXB8\\_KSLPNFPN#TSATAN#ATGGRA](#)

[Spectrum\\_00562\\_Q7Z7M0\\_RALLTN#VSSVALGSRR](#)  
[Spectrum\\_00563\\_Q8IZF2\\_KANEQVVQSLN#QTYKM](#)  
[Spectrum\\_00564\\_Q8NBJ4\\_KAVLVNN#ITTGERL](#)  
[Spectrum\\_00565\\_Q96IY4\\_KKQVHFFVN#ASDVDNVKA](#)  
[Spectrum\\_00566\\_Q96IY4\\_KKKQVHFFVN#ASDVDNVKA](#)  
[Spectrum\\_00567\\_Q96IY4\\_KQVHFFVN#ASDVDNVKA](#)  
[Spectrum\\_00568\\_Q96IY4\\_KKQ#VHFFVN#ASDVDNVKA](#)  
[Spectrum\\_00569\\_Q96PD5\\_RGFGVAIVGN#YTAALPTEAALRT](#)  
[Spectrum\\_00570\\_Q96PD5\\_RLEPVHLQLOCMSQEQLAQVAAN#ATKE](#)  
[Spectrum\\_00571\\_Q96PD5\\_RLEPVHLQLOCM#SQEQLAQVAAN#ATKE](#)  
[Spectrum\\_00572\\_Q96PD5\\_RLYHFLLGAWSLN#ATELDPCPLSPELLGLTKE](#)  
[Spectrum\\_00573\\_Q96PD5\\_RLEPVHLQLOCMSQ#EQLAQVAAN#ATKE](#)  
[Spectrum\\_00574\\_Q96PD5\\_RLEPVHLQLOCMSQEO#LAQVAAN#ATKE](#)  
[Spectrum\\_00575\\_Q96PD5\\_RLEPVHLQLO#CMSQEQLAQVAAN#ATKE](#)  
[Spectrum\\_00576\\_Q96PD5\\_RLEPVHLQ#LQCMSQEQLAQVAAN#ATKE](#)  
[Spectrum\\_00577\\_Q96PD5\\_RLEPVHLQ#LQCM#SQEQLAQVAAN#ATKE](#)  
[Spectrum\\_00578\\_Q96PD5\\_RLEPVHLQLOCM#SQEQ#LAQVAAN#ATKE](#)  
[Spectrum\\_00579\\_Q96PD5\\_RLEPVHLQLOCM#SQ#EQLAQVAAN#ATKE](#)  
[Spectrum\\_00580\\_Q9NZP8\\_KDRODGEEVLQCM#PVCGRPVTPIAQN#QTTLGSSRA](#)  
[Spectrum\\_00581\\_Q9NZP8\\_KDRODGEEVLQCMPVCGRPVTPIAQN#QTTLGSSRA](#)  
[Spectrum\\_00582\\_Q9ULI3\\_KSHAASDAPEN#LTLAETADARG](#)  
[Spectrum\\_00583\\_Q9Y5Y7\\_KANQQLN#FTEAKE](#)  
[Spectrum\\_00584\\_Q9Y6R7\\_RYLPVN#SSLLTSDCSERC](#)  
[Spectrum\\_00585\\_Q9Y6R7\\_RLLISLSESPASVSILSQADN#TSKK](#)  
[Spectrum\\_00586\\_Q9Y6R7\\_RGLCVLSVGAN#LTTFDGARG](#)  
[Spectrum\\_00587\\_S4R471\\_RYFYN#GTSMACETFQYGGCM#GNGNN#FVTVRG](#)  
[Spectrum\\_00588\\_S4R471\\_RYFYN#GTSM#ACETFQ#YGGCM#GN#GNN#FVTVRG](#)  
[Spectrum\\_00589\\_S4R471\\_RYFYN#GTSM#ACETFQ#YGGCMGNGNN#FVTVRG](#)  
[Spectrum\\_00590\\_S4R471\\_RYFYN#GTSM#ACETFQYGGCMGNGN#N#FVTVRG](#)  
[Spectrum\\_00591\\_S4R471\\_RYFYN#GTSMACETFQ#YGGCMGNGN#N#FVTVRG](#)  
[Spectrum\\_00592\\_S4R471\\_RYFYN#GTSM#ACETFQ#YGGCMGNGN#FVTVRG](#)  
[Spectrum\\_00593\\_S4R471\\_RYFYN#GTSM#ACETFQYGGCM#GN#GNN#FVTVRG](#)  
[Spectrum\\_00594\\_S4R471\\_RYFYN#GTSM#ACETFQYGGCM#GNGN#N#FVTVRG](#)  
[Spectrum\\_00595\\_S4R471\\_RYFYN#GTSM#ACETFQYGGCM#GN#GNN#FVTVRG](#)  
[Spectrum\\_00596\\_S4R471\\_RYFYN#GTSMACETFQYGGCMGNGN#N#FVTVRG](#)  
[Spectrum\\_00597\\_S4R471\\_RYFYN#GTSMACETFQYGGCM#GNGN#N#FVTVRG](#)  
[Spectrum\\_00598\\_S4R471\\_RYFYN#GTSM#ACETFQYGGCM#GNGNN#FVTVRG](#)  
[Spectrum\\_00599\\_S4R471\\_RYFYN#GTSM#ACETFQ#YGGCM#GNGNN#FVTVRG](#)

# MASCOT SCIENCE Mascot Search Results

## Peptide View

MS/MS Fragmentation of **LDVDQALNR**

Found in **B0FWH6** in **con\_Xuniprot\_HUMAN3**, B0FWH6\_HUMAN Sex hormone binding globulin (Fragment) OS=Homo sapiens GN=SHBG PE=2 SV=1

Match to Query 189: 1043.529368 from(522.771960,2+) intensity(67120.6875) rtinseconds(888) scans(2023) index(26488)

Title: 111019\_Est\_MI\_YS\_G\_09Spectrum1726\_scans\_2023

Data file C:\mascot\20140703\_Tmgf\_1D\CSV\_UseAnalysis\MasterCSV\All\_Glyco\mgf\ptm\UC18ERLIC\_PTM\_35D.mgf

Click mouse within plot area to zoom in by factor of two about that point

Or,  to  Da

Label all possible matches  Label matches used for scoring

Show Y-axis

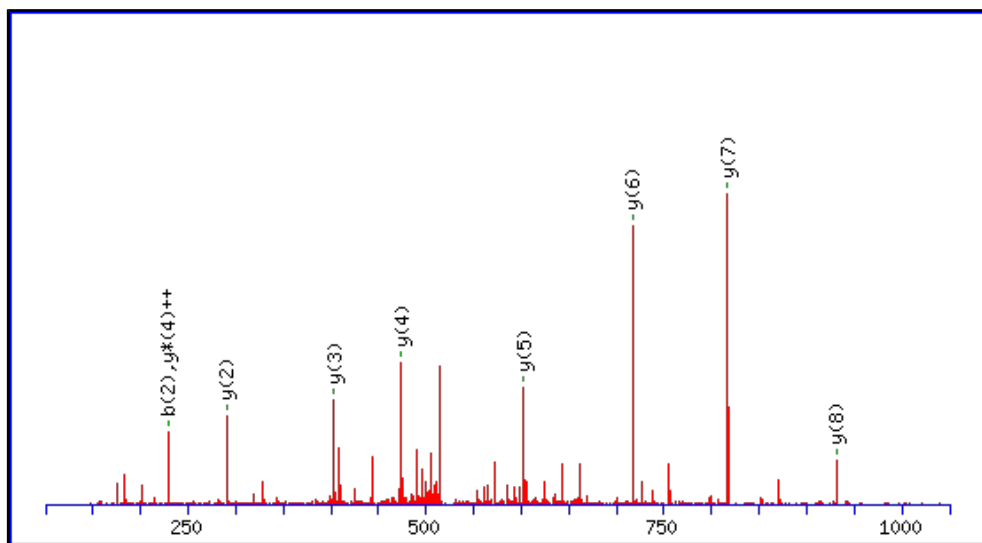

Monoisotopic mass of neutral peptide **Mr(calc)**: 1043.5247

Fixed modifications: Carbamidomethyl (C) (apply to specified residues or termini only)

Variable modifications:

N8 : Deamidated (NQ)

Ions Score: 70 Expect: 1.5e-005

Matches : 9/76 fragment ions using 9 most intense peaks ([help](#))

| # | b        | b <sup>++</sup> | b*       | b <sup>+++</sup> | b <sup>0</sup> | b <sup>0++</sup> | Seq. | y        | y <sup>++</sup> | y*       | y <sup>+++</sup> | y <sup>0</sup> | y <sup>0++</sup> | # |
|---|----------|-----------------|----------|------------------|----------------|------------------|------|----------|-----------------|----------|------------------|----------------|------------------|---|
| 1 | 114.0913 | 57.5493         |          |                  |                |                  | L    |          |                 |          |                  |                |                  | 9 |
| 2 | 229.1183 | 115.0628        |          |                  | 211.1077       | 106.0575         | D    | 931.4480 | 466.2276        | 914.4214 | 457.7143         | 913.4374       | 457.2223         | 8 |
| 3 | 328.1867 | 164.5970        |          |                  | 310.1761       | 155.5917         | V    | 816.4210 | 408.7141        | 799.3945 | 400.2009         | 798.4104       | 399.7089         | 7 |
| 4 | 443.2136 | 222.1105        |          |                  | 425.2031       | 213.1052         | D    | 717.3526 | 359.1799        | 700.3260 | 350.6667         | 699.3420       | 350.1747         | 6 |
| 5 | 571.2722 | 286.1397        | 554.2457 | 277.6265         | 553.2617       | 277.1345         | Q    | 602.3257 | 301.6665        | 585.2991 | 293.1532         |                |                  | 5 |
| 6 | 642.3093 | 321.6583        | 625.2828 | 313.1450         | 624.2988       | 312.6530         | A    | 474.2671 | 237.6372        | 457.2405 | 229.1239         |                |                  | 4 |
| 7 | 755.3934 | 378.2003        | 738.3668 | 369.6871         | 737.3828       | 369.1951         | L    | 403.2300 | 202.1186        | 386.2034 | 193.6053         |                |                  | 3 |
| 8 | 870.4203 | 435.7138        | 853.3938 | 427.2005         | 852.4098       | 426.7085         | N    | 290.1459 | 145.5766        | 273.1193 | 137.0633         |                |                  | 2 |
| 9 |          |                 |          |                  |                |                  | R    | 175.1190 | 88.0631         | 158.0924 | 79.5498          |                |                  | 1 |

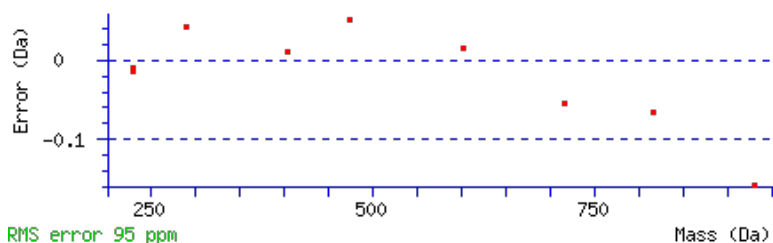



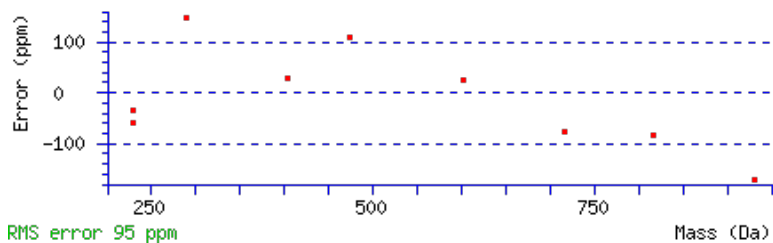

NCBI **BLAST** search of [LDVDQALNR](#)

(Parameters: blastp, nr protein database, expect=20000, no filter, PAM30)

Other BLAST [web gateways](#)

**All matches to this query**

| Score | Mr(calc)  | Delta  | Sequence                   | Site Analysis         |
|-------|-----------|--------|----------------------------|-----------------------|
| 70.2  | 1043.5247 | 0.0046 | <a href="#">LDVDQALNR</a>  | Deamidated N8 100.00% |
| 22.2  | 1043.5247 | 0.0046 | <a href="#">LDVDQALNR</a>  | Deamidated Q5 0.00%   |
| 21.6  | 1043.5247 | 0.0046 | <a href="#">VDLQGELDR</a>  |                       |
| 15.0  | 1043.5247 | 0.0046 | <a href="#">IDVADIDAGR</a> |                       |
| 14.2  | 1043.5247 | 0.0046 | <a href="#">TSPSTAPLDR</a> |                       |
| 13.8  | 1043.5247 | 0.0046 | <a href="#">ISQLPSQDR</a>  |                       |
| 12.7  | 1043.5247 | 0.0046 | <a href="#">DVVEGADLAR</a> |                       |
| 12.7  | 1043.5247 | 0.0046 | <a href="#">LDSSPVSSPR</a> |                       |
| 11.5  | 1043.5247 | 0.0046 | <a href="#">LDQGNIEVR</a>  |                       |
| 11.5  | 1043.5247 | 0.0046 | <a href="#">LDQGNIEVR</a>  |                       |

**Mascot:** <http://www.matrixscience.com/>

# MASCOT SCIENCE Mascot Search Results

## Peptide View

MS/MS Fragmentation of **SHEIWTHSCPQSPGNGTDASH**

Found in **B0FWH6** in **con\_Xuniprot\_HUMAN3**, B0FWH6\_HUMAN Sex hormone binding globulin (Fragment) OS=Homo sapiens GN=SHBG PE=2 SV=1

Match to Query 15144: 2304.951792 from(769.324540,3+) intensity(20358.0137) rtinseconds(436) scans(846) index(25162)

Title: 111019\_Est\_MI\_YS\_G\_07Spectrum675\_scans\_846

Data file C:\mascot\20140703\_Tmgf\_1D\CSV\_UseAnalysis\MasterCSV\All\_Glyco\mgf\ptm\UC18ERLIC\_PTM\_35D.mgf

Click mouse within plot area to zoom in by factor of two about that point

Or, to Da

Label all possible matches Label matches used for scoring

Show Y-axis

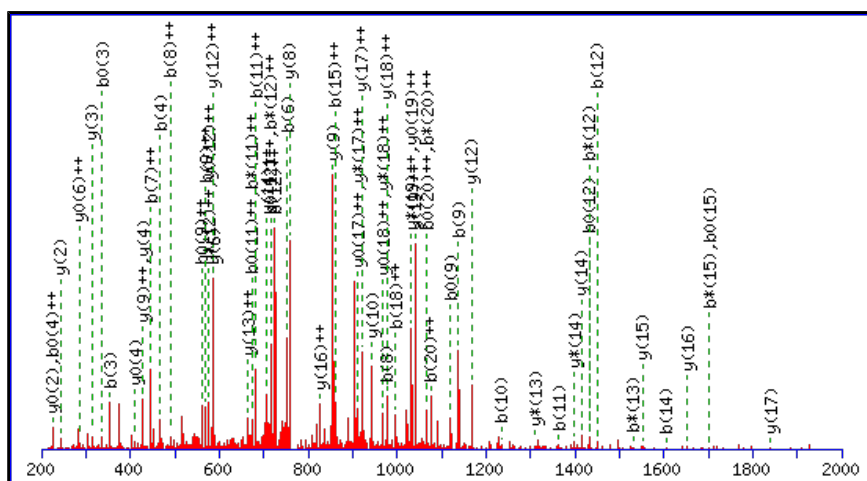

Monoisotopic mass of neutral peptide Mr(calc): 2304.9454

Fixed modifications: Carbamidomethyl (C) (apply to specified residues or termini only)

Variable modifications:

N15 : Deamidated (NQ)

Ions Score: 56 Expect: 8.5e-005

Matches : 67/206 fragment ions using 131 most intense peaks [\(help\)](#)

| #  | b                | b <sup>++</sup>  | b <sup>*</sup>   | b <sup>*++</sup> | b <sup>0</sup>   | b <sup>0++</sup> | Seq. | y                | y <sup>++</sup>  | y <sup>*</sup>   | y <sup>*++</sup> | y <sup>0</sup>  | y <sup>0++</sup> | #  |
|----|------------------|------------------|------------------|------------------|------------------|------------------|------|------------------|------------------|------------------|------------------|-----------------|------------------|----|
| 1  | 88.0393          | 44.5233          |                  |                  | 70.0287          | 35.5180          | S    |                  |                  |                  |                  |                 |                  | 21 |
| 2  | <b>225.0982</b>  | 113.0527         |                  |                  | 207.0877         | 104.0475         | H    | 2218.9207        | 1109.9640        | 2201.8941        | 1101.4507        | 2200.9101       | 1100.9587        | 20 |
| 3  | <b>354.1408</b>  | 177.5740         |                  |                  | <b>336.1302</b>  | 168.5688         | E    | 2081.8618        | <b>1041.4345</b> | 2064.8352        | <b>1032.9212</b> | 2063.8512       | <b>1032.4292</b> | 19 |
| 4  | <b>467.2249</b>  | 234.1161         |                  |                  | 449.2143         | <b>225.1108</b>  | I    | 1952.8192        | <b>976.9132</b>  | 1935.7926        | <b>968.3999</b>  | 1934.8086       | <b>967.9079</b>  | 18 |
| 5  | 653.3042         | 327.1557         |                  |                  | 635.2936         | 318.1504         | W    | <b>1839.7351</b> | <b>920.3712</b>  | 1822.7086        | <b>911.8579</b>  | 1821.7245       | <b>911.3659</b>  | 17 |
| 6  | <b>754.3519</b>  | 377.6796         |                  |                  | 736.3413         | 368.6743         | T    | <b>1653.6558</b> | <b>827.3315</b>  | 1636.6292        | 818.8183         | 1635.6452       | 818.3263         | 16 |
| 7  | 891.4108         | <b>446.2090</b>  |                  |                  | 873.4002         | 437.2037         | H    | <b>1552.6081</b> | 776.8077         | 1535.5816        | 768.2944         | 1534.5975       | 767.8024         | 15 |
| 8  | <b>978.4428</b>  | <b>489.7250</b>  |                  |                  | 960.4322         | 480.7198         | S    | <b>1415.5492</b> | <b>708.2782</b>  | <b>1398.5227</b> | 699.7650         | 1397.5386       | 699.2730         | 14 |
| 9  | <b>1138.4735</b> | <b>569.7404</b>  |                  |                  | <b>1120.4629</b> | <b>560.7351</b>  | C    | 1328.5172        | <b>664.7622</b>  | <b>1311.4906</b> | 656.2489         | 1310.5066       | 655.7569         | 13 |
| 10 | <b>1235.5262</b> | 618.2667         |                  |                  | 1217.5157        | 609.2615         | P    | <b>1168.4865</b> | <b>584.7469</b>  | 1151.4600        | <b>576.2336</b>  | 1150.4760       | <b>575.7416</b>  | 12 |
| 11 | <b>1363.5848</b> | <b>682.2960</b>  | 1346.5582        | <b>673.7828</b>  | 1345.5742        | <b>673.2908</b>  | Q    | 1071.4338        | 536.2205         | 1054.4072        | 527.7072         | 1053.4232       | 527.2152         | 11 |
| 12 | <b>1450.6168</b> | <b>725.8121</b>  | <b>1433.5903</b> | <b>717.2988</b>  | <b>1432.6063</b> | <b>716.8068</b>  | S    | <b>943.3752</b>  | 472.1912         | 926.3486         | 463.6780         | 925.3646        | 463.1859         | 10 |
| 13 | 1547.6696        | 774.3384         | <b>1530.6430</b> | 765.8252         | 1529.6590        | 765.3331         | P    | <b>856.3432</b>  | <b>428.6752</b>  | 839.3166         | 420.1619         | 838.3326        | 419.6699         | 9  |
| 14 | <b>1604.6911</b> | 802.8492         | 1587.6645        | 794.3359         | 1586.6805        | 793.8439         | G    | <b>759.2904</b>  | 380.1488         | 742.2638         | 371.6356         | 741.2798        | 371.1435         | 8  |
| 15 | 1719.7180        | <b>860.3626</b>  | <b>1702.6914</b> | 851.8494         | <b>1701.7074</b> | 851.3574         | N    | 702.2689         | 351.6381         | 685.2424         | 343.1248         | 684.2584        | 342.6328         | 7  |
| 16 | 1776.7395        | 888.8734         | 1759.7129        | 880.3601         | 1758.7289        | 879.8681         | G    | <b>587.2420</b>  | 294.1246         |                  |                  | 569.2314        | <b>285.1193</b>  | 6  |
| 17 | 1877.7871        | 939.3972         | 1860.7606        | 930.8839         | 1859.7766        | 930.3919         | T    | 530.2205         | 265.6139         |                  |                  | 512.2100        | 256.6086         | 5  |
| 18 | 1992.8141        | <b>996.9107</b>  | 1975.7875        | 988.3974         | 1974.8035        | 987.9054         | D    | <b>429.1728</b>  | 215.0901         |                  |                  | <b>411.1623</b> | 206.0848         | 4  |
| 19 | 2063.8512        | <b>1032.4292</b> | 2046.8246        | 1023.9160        | 2045.8406        | 1023.4240        | A    | <b>314.1459</b>  | 157.5766         |                  |                  | 296.1353        | 148.5713         | 3  |
| 20 | 2150.8832        | <b>1075.9452</b> | 2133.8567        | <b>1067.4320</b> | 2132.8727        | <b>1066.9400</b> | S    | <b>243.1088</b>  | 122.0580         |                  |                  | <b>225.0982</b> | 113.0527         | 2  |
| 21 |                  |                  |                  |                  |                  |                  | H    | 156.0768         | 78.5420          |                  |                  |                 |                  | 1  |

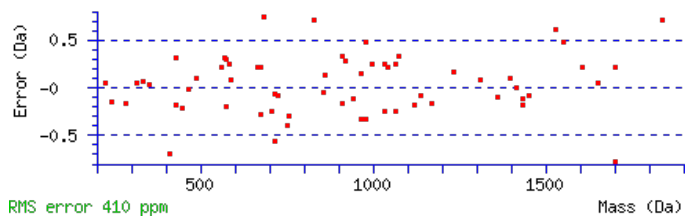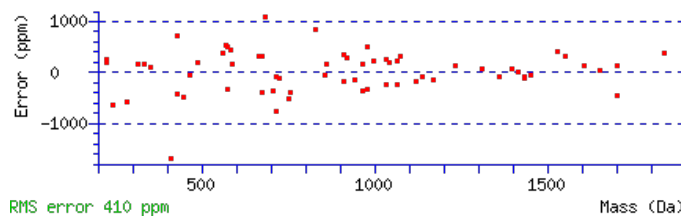

NCBI **BLAST** search of [SHEIWITHSCPOSFGNGTDASH](#)

(Parameters: blastp, nr protein database, expect=20000, no filter, PAM30)

Other BLAST [web gateways](#)

**All matches to this query**

| Score | Mr(calc)  | Delta  | Sequence                               | Site Analysis         |
|-------|-----------|--------|----------------------------------------|-----------------------|
| 55.6  | 2304.9454 | 0.0064 | <a href="#">SHEIWITHSCPOSFGNGTDASH</a> | Deamidated N15 72.73% |
| 51.4  | 2304.9454 | 0.0064 | <a href="#">SHEIWITHSCPOSFGNGTDASH</a> | Deamidated Q11 27.27% |

Mascot: <http://www.matrixscience.com/>

# MASCOT SCIENCE Mascot Search Results

## Peptide View

MS/MS Fragmentation of **CATPHGDNASLEATFVKR**

Found in **B1AHL2** in **con\_Xuniprot\_HUMAN3**, B1AHL2\_HUMAN Fibulin-1 OS=Homo sapiens GN=FBLN1 PE=2 SV=1

Match to Query 11881: 1973.934056 from(494.490790,4+) intensity(32052.8047) rtinseconds(719) scans(1553) index(10776)

Title: 111019\_Est\_ISCardio\_NMI\_YS\_G\_7Spectrum1291\_scans\_\_1553

Data file C:\\mascot\\20140703\_Tmgf\_1D\\CSV\_UseAnalysis\\MasterCSV\\All\_Glyco\\mgf\\ptm\\UC18ERLIC\_PTM\_35D.mgf

Click mouse within plot area to zoom in by factor of two about that point

Or, to Da

Label all possible matches Label matches used for scoring

Show Y-axis

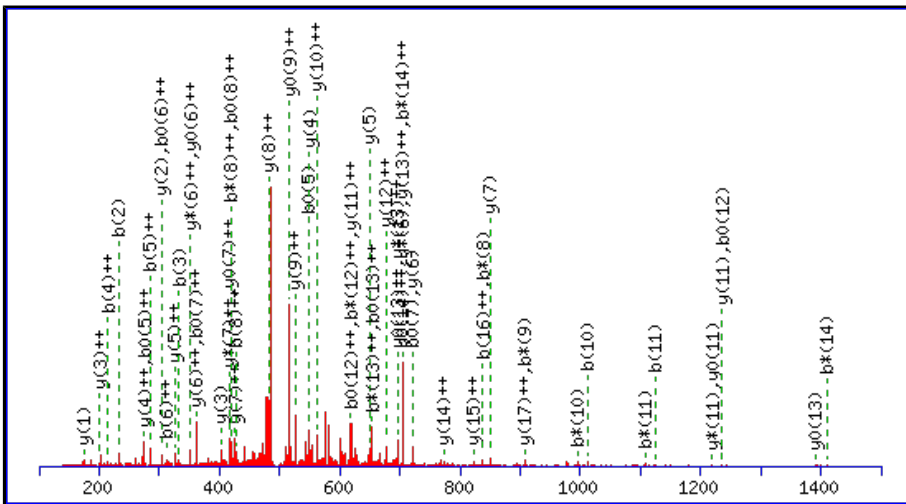

Monoisotopic mass of neutral peptide Mr(calc): 1973.9265

Fixed modifications: Carbamidomethyl (C) (apply to specified residues or termini only)

Variable modifications:

N8 : Deamidated (NQ)

Ions Score: 84 Expect: 8.3e-007

Matches : 61/178 fragment ions using 91 most intense peaks ([help](#))

| #  | b                | b <sup>++</sup> | b <sup>*</sup>   | b <sup>*++</sup> | b <sup>0</sup>   | b <sup>0++</sup> | Seq. | y                | y <sup>++</sup> | y <sup>*</sup>   | y <sup>*++</sup> | y <sup>0</sup>   | y <sup>0++</sup> | #  |
|----|------------------|-----------------|------------------|------------------|------------------|------------------|------|------------------|-----------------|------------------|------------------|------------------|------------------|----|
| 1  | 161.0379         | 81.0226         |                  |                  |                  |                  | C    |                  |                 |                  |                  |                  |                  | 18 |
| 2  | <b>232.0750</b>  | 116.5412        |                  |                  |                  |                  | A    | 1814.9032        | <b>907.9552</b> | 1797.8766        | 899.4419         | 1796.8926        | 898.9499         | 17 |
| 3  | <b>333.1227</b>  | 167.0650        |                  |                  | 315.1122         | 158.0597         | T    | 1743.8660        | 872.4367        | 1726.8395        | 863.9234         | 1725.8555        | 863.4314         | 16 |
| 4  | 430.1755         | <b>215.5914</b> |                  |                  | 412.1649         | 206.5861         | P    | 1642.8184        | <b>821.9128</b> | 1625.7918        | 813.3995         | 1624.8078        | 812.9075         | 15 |
| 5  | 567.2344         | <b>284.1208</b> |                  |                  | <b>549.2238</b>  | <b>275.1156</b>  | H    | 1545.7656        | <b>773.3864</b> | 1528.7390        | 764.8732         | 1527.7550        | 764.3812         | 14 |
| 6  | 624.2559         | <b>312.6316</b> |                  |                  | 606.2453         | <b>303.6263</b>  | G    | 1408.7067        | <b>704.8570</b> | 1391.6801        | <b>696.3437</b>  | <b>1390.6961</b> | <b>695.8517</b>  | 13 |
| 7  | 739.2828         | 370.1450        |                  |                  | <b>721.2722</b>  | <b>361.1398</b>  | D    | 1351.6852        | <b>676.3462</b> | 1334.6587        | 667.8330         | 1333.6747        | 667.3410         | 12 |
| 8  | 854.3097         | <b>427.6585</b> | <b>837.2832</b>  | <b>419.1452</b>  | 836.2992         | <b>418.6532</b>  | N    | <b>1236.6583</b> | <b>618.8328</b> | <b>1219.6317</b> | 610.3195         | <b>1218.6477</b> | 609.8275         | 11 |
| 9  | 925.3469         | 463.1771        | <b>908.3203</b>  | 454.6638         | 907.3363         | 454.1718         | A    | 1121.6313        | <b>561.3193</b> | 1104.6048        | 552.8060         | 1103.6208        | 552.3140         | 10 |
| 10 | <b>1012.3789</b> | 506.6931        | <b>995.3523</b>  | 498.1798         | 994.3683         | 497.6878         | S    | 1050.5942        | <b>525.8007</b> | 1033.5677        | 517.2875         | 1032.5837        | <b>516.7955</b>  | 9  |
| 11 | <b>1125.4629</b> | 563.2351        | <b>1108.4364</b> | 554.7218         | 1107.4524        | 554.2298         | L    | 963.5622         | <b>482.2847</b> | 946.5356         | 473.7715         | 945.5516         | 473.2795         | 8  |
| 12 | 1254.5055        | 627.7564        | 1237.4790        | <b>619.2431</b>  | <b>1236.4950</b> | <b>618.7511</b>  | E    | <b>850.4781</b>  | <b>425.7427</b> | 833.4516         | <b>417.2294</b>  | 832.4676         | <b>416.7374</b>  | 7  |
| 13 | 1325.5427        | 663.2750        | 1308.5161        | <b>654.7617</b>  | 1307.5321        | <b>654.2697</b>  | A    | <b>721.4355</b>  | <b>361.2214</b> | <b>704.4090</b>  | <b>352.7081</b>  | 703.4250         | <b>352.2161</b>  | 6  |
| 14 | 1426.5903        | 713.7988        | <b>1409.5638</b> | <b>705.2855</b>  | 1408.5798        | <b>704.7935</b>  | T    | <b>650.3984</b>  | <b>325.7028</b> | 633.3719         | 317.1896         | 632.3879         | 316.6976         | 5  |
| 15 | 1573.6588        | 787.3330        | 1556.6322        | 778.8197         | 1555.6482        | 778.3277         | F    | <b>549.3507</b>  | <b>275.1790</b> | 532.3242         | 266.6657         |                  |                  | 4  |
| 16 | 1672.7272        | <b>836.8672</b> | 1655.7006        | 828.3539         | 1654.7166        | 827.8619         | V    | <b>402.2823</b>  | <b>201.6448</b> | 385.2558         | 193.1315         |                  |                  | 3  |
| 17 | 1800.8221        | 900.9147        | 1783.7956        | 892.4014         | 1782.8116        | 891.9094         | K    | <b>303.2139</b>  | 152.1106        | 286.1874         | 143.5973         |                  |                  | 2  |
| 18 |                  |                 |                  |                  |                  |                  | R    | <b>175.1190</b>  | 88.0631         | 158.0924         | 79.5498          |                  |                  | 1  |



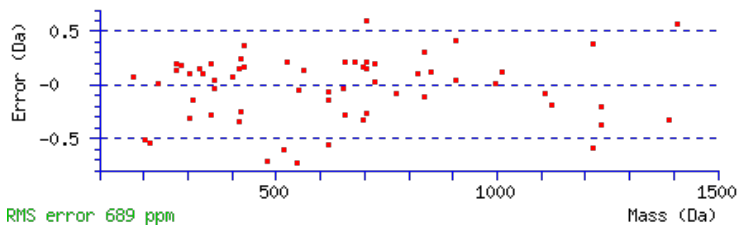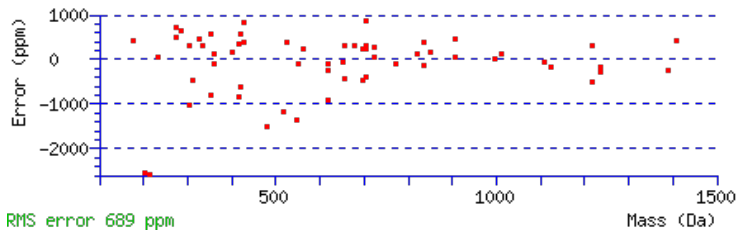

NCBI **BLAST** search of [CATPHGDNASLEATFVKR](#)

(Parameters: blastp, nr protein database, expect=20000, no filter, PAM30)

Other BLAST [web gateways](#)

**All matches to this query**

| Score | Mr(calc)  | Delta   | Sequence                              |
|-------|-----------|---------|---------------------------------------|
| 84.0  | 1973.9265 | 0.0075  | <a href="#">CATPHGDNASLEATFVKR</a>    |
| 7.4   | 1971.9326 | 2.0014  | <a href="#">SHPDQVASFADLAGKWDK</a>    |
| 6.3   | 1972.9272 | 1.0068  | <a href="#">HLADMALVGAEQERSSSR</a>    |
| 6.0   | 1973.9438 | -0.0097 | <a href="#">MEIKDQGAQMEPLLPTTR</a>    |
| 4.7   | 1971.9287 | 2.0054  | <a href="#">EGPSGPHGNEGKVGPPGDKGV</a> |
| 4.4   | 1973.9357 | -0.0016 | <a href="#">NEWHGRWNAEAESHPRK</a>     |
| 4.3   | 1971.9333 | 2.0007  | <a href="#">EERSHQARNVMGGLTWR</a>     |
| 4.1   | 1971.9360 | 1.9981  | <a href="#">SQASEASELSLFVAGCAAR</a>   |
| 4.0   | 1971.9247 | 2.0093  | <a href="#">LIDYISMNSTENYHKK</a>      |
| 3.9   | 1972.9239 | 1.0102  | <a href="#">SYRSVGGSGGGSFGDNLVTR</a>  |

Mascot: <http://www.matrixscience.com/>

# MATRIX SCIENCE Mascot Search Results

## Peptide View

MS/MS Fragmentation of **NCQDIDECVTGIHNC SINETCFNIQGGFR**

Found in **B1AHL2** in **con\_Xuniprot\_HUMAN3**, B1AHL2\_HUMAN Fibulin-1 OS=Homo sapiens GN=FBLN1 PE=2 SV=1

Match to Query 27785: 3461.446692 from(1154.822840,3+) intensity(7200.7026) rtinseconds(3201) scans(8491) index(20053)

Title: 111019\_Est\_ML\_YP\_G\_09Spectrum7540\_scans\_\_8491

Data file C:\mascot\20140703\_Tmgf\_1D\CSV\_UseAnalysis\MasterCSV\All\_Glyco\mgf\ptm\UC18ERLIC\_PTM\_35D.mgf

Click mouse within plot area to zoom in by factor of two about that point

Or,  to  Da

Label all possible matches  Label matches used for scoring

Show Y-axis

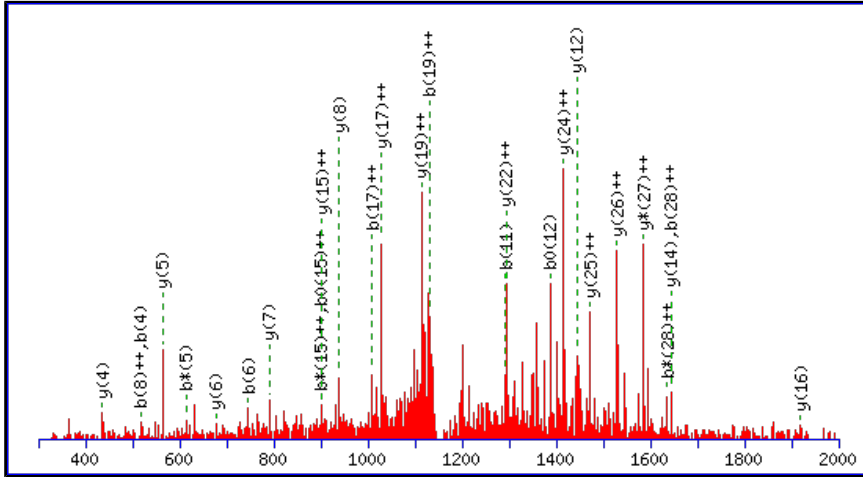

Monoisotopic mass of neutral peptide Mr(calc): 3459.4224

Fixed modifications: Carbamidomethyl (C) (apply to specified residues or termini only)

Variable modifications:

N14 : Deamidated (NQ)

N18 : Deamidated (NQ)

Ions Score: 59 Expect: 4.7e-005

Matches : 28/312 fragment ions using 34 most intense peaks ([help](#))

| #  | b                | b <sup>++</sup>  | b <sup>*</sup>  | b <sup>*++</sup> | b <sup>0</sup>   | b <sup>0++</sup> | Seq. | y                | y <sup>++</sup>  | y <sup>*</sup> | y <sup>*++</sup> | y <sup>0</sup> | y <sup>0++</sup> | #  |
|----|------------------|------------------|-----------------|------------------|------------------|------------------|------|------------------|------------------|----------------|------------------|----------------|------------------|----|
| 1  | 115.0502         | 58.0287          | 98.0237         | 49.5155          |                  |                  | N    |                  |                  |                |                  |                |                  | 29 |
| 2  | 275.0809         | 138.0441         | 258.0543        | 129.5308         |                  |                  | C    | 3346.3868        | 1673.6970        | 3329.3602      | 1665.1838        | 3328.3762      | 1664.6917        | 28 |
| 3  | 403.1394         | 202.0734         | 386.1129        | 193.5601         |                  |                  | Q    | 3186.3561        | 1593.6817        | 3169.3296      | 1585.1684        | 3168.3456      | 1584.6764        | 27 |
| 4  | <b>518.1664</b>  | 259.5868         | 501.1398        | 251.0736         | 500.1558         | 250.5815         | D    | 3058.2975        | <b>1529.6524</b> | 3041.2710      | 1521.1391        | 3040.2870      | 1520.6471        | 26 |
| 5  | 631.2504         | 316.1289         | <b>614.2239</b> | 307.6156         | 613.2399         | 307.1236         | I    | 2943.2706        | <b>1472.1389</b> | 2926.2441      | 1463.6257        | 2925.2600      | 1463.1337        | 25 |
| 6  | <b>746.2774</b>  | 373.6423         | 729.2508        | 365.1291         | 728.2668         | 364.6370         | D    | 2830.1865        | <b>1415.5969</b> | 2813.1600      | 1407.0836        | 2812.1760      | 1406.5916        | 24 |
| 7  | 875.3200         | 438.1636         | 858.2934        | 429.6504         | 857.3094         | 429.1583         | E    | 2715.1596        | 1358.0834        | 2698.1331      | 1349.5702        | 2697.1490      | 1349.0782        | 23 |
| 8  | 1035.3506        | <b>518.1789</b>  | 1018.3241       | 509.6657         | 1017.3401        | 509.1737         | C    | 2586.1170        | <b>1293.5621</b> | 2569.0905      | 1285.0489        | 2568.1064      | 1284.5569        | 22 |
| 9  | 1134.4190        | 567.7132         | 1117.3925       | 559.1999         | 1116.4085        | 558.7079         | V    | 2426.0864        | 1213.5468        | 2409.0598      | 1205.0335        | 2408.0758      | 1204.5415        | 21 |
| 10 | 1235.4667        | 618.2370         | 1218.4402       | 609.7237         | 1217.4562        | 609.2317         | T    | 2327.0179        | 1164.0126        | 2309.9914      | 1155.4993        | 2309.0074      | 1155.0073        | 20 |
| 11 | <b>1292.4882</b> | 646.7477         | 1275.4616       | 638.2345         | 1274.4776        | 637.7424         | G    | 2225.9703        | <b>1113.4888</b> | 2208.9437      | 1104.9755        | 2207.9597      | 1104.4835        | 19 |
| 12 | 1405.5722        | 703.2898         | 1388.5457       | 694.7765         | <b>1387.5617</b> | 694.2845         | I    | 2168.9488        | 1084.9780        | 2151.9223      | 1076.4648        | 2150.9382      | 1075.9728        | 18 |
| 13 | 1542.6312        | 771.8192         | 1525.6046       | 763.3059         | 1524.6206        | 762.8139         | H    | 2055.8647        | <b>1028.4360</b> | 2038.8382      | 1019.9227        | 2037.8542      | 1019.4307        | 17 |
| 14 | 1657.6581        | 829.3327         | 1640.6315       | 820.8194         | 1639.6475        | 820.3274         | N    | <b>1918.8058</b> | 959.9066         | 1901.7793      | 951.3933         | 1900.7953      | 950.9013         | 16 |
| 15 | 1817.6887        | 909.3480         | 1800.6622       | <b>900.8347</b>  | 1799.6782        | <b>900.3427</b>  | C    | 1803.7789        | <b>902.3931</b>  | 1786.7523      | 893.8798         | 1785.7683      | 893.3878         | 15 |
| 16 | 1904.7208        | 952.8640         | 1887.6942       | 944.3508         | 1886.7102        | 943.8587         | S    | <b>1643.7482</b> | 822.3778         | 1626.7217      | 813.8645         | 1625.7377      | 813.3725         | 14 |
| 17 | 2017.8048        | <b>1009.4061</b> | 2000.7783       | 1000.8928        | 1999.7943        | 1000.4008        | I    | 1556.7162        | 778.8617         | 1539.6897      | 770.3485         | 1538.7056      | 769.8565         | 13 |
| 18 | 2132.8318        | 1066.9195        | 2115.8052       | 1058.4063        | 2114.8212        | 1057.9142        | N    | <b>1443.6321</b> | 722.3197         | 1426.6056      | 713.8064         | 1425.6216      | 713.3144         | 12 |
| 19 | 2261.8744        | <b>1131.4408</b> | 2244.8478       | 1122.9276        | 2243.8638        | 1122.4355        | E    | 1328.6052        | 664.8062         | 1311.5786      | 656.2930         | 1310.5946      | 655.8010         | 11 |
| 20 | 2362.9221        | 1181.9647        | 2345.8955       | 1173.4514        | 2344.9115        | 1172.9594        | T    | 1199.5626        | 600.2849         | 1182.5361      | 591.7717         | 1181.5520      | 591.2797         | 10 |
| 21 | 2522.9527        | 1261.9800        | 2505.9262       | 1253.4667        | 2504.9421        | 1252.9747        | C    | 1098.5149        | 549.7611         | 1081.4884      | 541.2478         |                |                  | 9  |
| 22 | 2670.0211        | 1335.5142        | 2652.9946       | 1327.0009        | 2652.0106        | 1326.5089        | F    | <b>938.4843</b>  | 469.7458         | 921.4577       | 461.2325         |                |                  | 8  |

|    |           |           |           |           |           |           |   |          |          |          |          |  |  |   |
|----|-----------|-----------|-----------|-----------|-----------|-----------|---|----------|----------|----------|----------|--|--|---|
| 23 | 2784.0640 | 1392.5357 | 2767.0375 | 1384.0224 | 2766.0535 | 1383.5304 | N | 791.4159 | 396.2116 | 774.3893 | 387.6983 |  |  | 7 |
| 24 | 2897.1481 | 1449.0777 | 2880.1216 | 1440.5644 | 2879.1375 | 1440.0724 | I | 677.3729 | 339.1901 | 660.3464 | 330.6768 |  |  | 6 |
| 25 | 3025.2067 | 1513.1070 | 3008.1801 | 1504.5937 | 3007.1961 | 1504.1017 | Q | 564.2889 | 282.6481 | 547.2623 | 274.1348 |  |  | 5 |
| 26 | 3082.2281 | 1541.6177 | 3065.2016 | 1533.1044 | 3064.2176 | 1532.6124 | G | 436.2303 | 218.6188 | 419.2037 | 210.1055 |  |  | 4 |
| 27 | 3139.2496 | 1570.1284 | 3122.2231 | 1561.6152 | 3121.2390 | 1561.1232 | G | 379.2088 | 190.1081 | 362.1823 | 181.5948 |  |  | 3 |
| 28 | 3286.3180 | 1643.6627 | 3269.2915 | 1635.1494 | 3268.3075 | 1634.6574 | F | 322.1874 | 161.5973 | 305.1608 | 153.0840 |  |  | 2 |
| 29 |           |           |           |           |           |           | R | 175.1190 | 88.0631  | 158.0924 | 79.5498  |  |  | 1 |

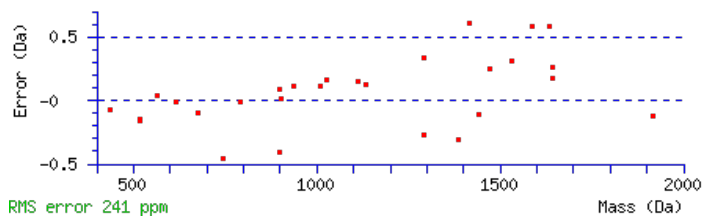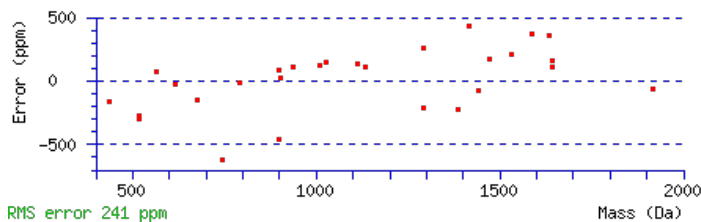

NCBI BLAST search of [NCQDIDECVTGIHNC SINETCFNIQGGFR](#)

(Parameters: blastp, nr protein database, expect=20000, no filter, PAM30)

Other BLAST [web gateways](#)

All matches to this query

| Score | Mr(calc)  | Delta  | Sequence                                       | Site Analysis              |
|-------|-----------|--------|------------------------------------------------|----------------------------|
| 59.4  | 3459.4224 | 2.0243 | <a href="#">NCQDIDECVTGIHNC SINETCFNIQGGFR</a> | Deamidated N14, N18 57.89% |
| 56.0  | 3459.4224 | 2.0243 | <a href="#">NCQDIDECVTGIHNC SINETCFNIQGGFR</a> | Deamidated N14, N23 26.77% |
| 53.3  | 3459.4224 | 2.0243 | <a href="#">NCQDIDECVTGIHNC SINETCFNIQGGFR</a> | Deamidated N18, N23 14.41% |
| 39.1  | 3459.4224 | 2.0243 | <a href="#">NCQDIDECVTGIHNC SINETCFNIQGGFR</a> | Deamidated N14, Q25 0.54%  |
| 36.9  | 3459.4224 | 2.0243 | <a href="#">NCQDIDECVTGIHNC SINETCFNIQGGFR</a> | Deamidated N18, Q25 0.33%  |
| 25.4  | 3459.4224 | 2.0243 | <a href="#">NCQDIDECVTGIHNC SINETCFNIQGGFR</a> | Deamidated N23, Q25 0.02%  |
| 22.4  | 3459.4224 | 2.0243 | <a href="#">NCQDIDECVTGIHNC SINETCFNIQGGFR</a> | Deamidated Q3, N18 0.01%   |
| 20.5  | 3459.4224 | 2.0243 | <a href="#">NCQDIDECVTGIHNC SINETCFNIQGGFR</a> | Deamidated N1, N18 0.01%   |
| 19.7  | 3459.4224 | 2.0243 | <a href="#">NCQDIDECVTGIHNC SINETCFNIQGGFR</a> | Deamidated Q3, N23 0.01%   |
| 18.3  | 3459.4224 | 2.0243 | <a href="#">NCQDIDECVTGIHNC SINETCFNIQGGFR</a> | Deamidated N1, N23 0.00%   |

Mascot: <http://www.matrixscience.com/>

# MATRIX SCIENCE Mascot Search Results

## Peptide View

MS/MS Fragmentation of **NCQDIDECVTGIHNC SINETCFNIQGGFR**

Found in **B1AHL2** in **con\_Xuniprot\_HUMAN3**, B1AHL2\_HUMAN Fibulin-1 OS=Homo sapiens GN=FBLN1 PE=2 SV=1

Match to Query 27784: 3461.446422 from(1154.822750,3+) intensity(0.0000) rtinseconds(1783) scans(4645) index(19666)

Title: 111019\_Est\_MI\_YP\_G\_09Spectrum4101\_scans\_\_4645

Data file C:\mascot\20140703\_Tmgf\_1D\CSV\_UseAnalysis\MasterCSV\All\_Glyco\mgf\ptm\UC18ERLIC\_PTM\_35D.mgf

Click mouse within plot area to zoom in by factor of two about that point

Or, to Da

Label all possible matches Label matches used for scoring

Show Y-axis

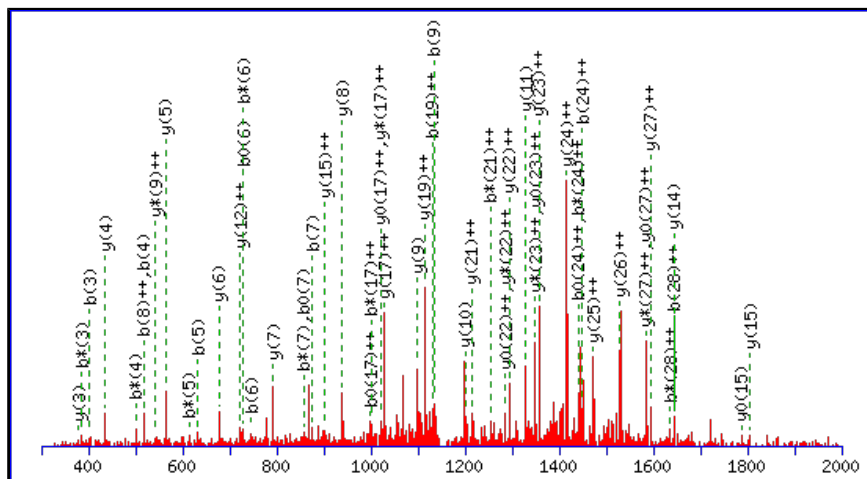

Monoisotopic mass of neutral peptide Mr(calc): 3459.4224

Fixed modifications: Carbamidomethyl (C) (apply to specified residues or termini only)

Variable modifications:

N18 : Deamidated (NQ)

N23 : Deamidated (NQ)

Ions Score: 57 Expect: 8.5e-005

Matches : 55/312 fragment ions using 119 most intense peaks ([help](#))

| #  | b                | b <sup>++</sup>  | b <sup>*</sup>  | b <sup>*++</sup> | b <sup>0</sup>  | b <sup>0++</sup> | Seq. | y                | y <sup>++</sup>  | y <sup>*</sup> | y <sup>*++</sup> | y <sup>0</sup>   | y <sup>0++</sup> | #  |
|----|------------------|------------------|-----------------|------------------|-----------------|------------------|------|------------------|------------------|----------------|------------------|------------------|------------------|----|
| 1  | 115.0502         | 58.0287          | 98.0237         | 49.5155          |                 |                  | N    |                  |                  |                |                  |                  |                  | 29 |
| 2  | 275.0809         | 138.0441         | 258.0543        | 129.5308         |                 |                  | C    | 3346.3868        | 1673.6970        | 3329.3602      | 1665.1838        | 3328.3762        | 1664.6917        | 28 |
| 3  | <b>403.1394</b>  | 202.0734         | <b>386.1129</b> | 193.5601         |                 |                  | Q    | 3186.3561        | <b>1593.6817</b> | 3169.3296      | <b>1585.1684</b> | 3168.3456        | <b>1584.6764</b> | 27 |
| 4  | <b>518.1664</b>  | 259.5868         | <b>501.1398</b> | 251.0736         | 500.1558        | 250.5815         | D    | 3058.2975        | <b>1529.6524</b> | 3041.2710      | 1521.1391        | 3040.2870        | 1520.6471        | 26 |
| 5  | <b>631.2504</b>  | 316.1289         | <b>614.2239</b> | 307.6156         | 613.2399        | 307.1236         | I    | 2943.2706        | <b>1472.1389</b> | 2926.2441      | 1463.6257        | 2925.2600        | 1463.1337        | 25 |
| 6  | <b>746.2774</b>  | 373.6423         | <b>729.2508</b> | 365.1291         | <b>728.2668</b> | 364.6370         | D    | 2830.1865        | <b>1415.5969</b> | 2813.1600      | 1407.0836        | 2812.1760        | 1406.5916        | 24 |
| 7  | <b>875.3200</b>  | 438.1636         | <b>858.2934</b> | 429.6504         | <b>857.3094</b> | 429.1583         | E    | 2715.1596        | <b>1358.0834</b> | 2698.1331      | <b>1349.5702</b> | 2697.1490        | <b>1349.0782</b> | 23 |
| 8  | 1035.3506        | <b>518.1789</b>  | 1018.3241       | 509.6657         | 1017.3401       | 509.1737         | C    | 2586.1170        | <b>1293.5621</b> | 2569.0905      | <b>1285.0489</b> | 2568.1064        | <b>1284.5569</b> | 22 |
| 9  | <b>1134.4190</b> | 567.7132         | 1117.3925       | 559.1999         | 1116.4085       | 558.7079         | V    | 2426.0864        | <b>1213.5468</b> | 2409.0598      | 1205.0335        | 2408.0758        | 1204.5415        | 21 |
| 10 | 1235.4667        | 618.2370         | 1218.4402       | 609.7237         | 1217.4562       | 609.2317         | T    | 2327.0179        | 1164.0126        | 2309.9914      | 1155.4993        | 2309.0074        | 1155.0073        | 20 |
| 11 | 1292.4882        | 646.7477         | 1275.4616       | 638.2345         | 1274.4776       | 637.7424         | G    | 2225.9703        | <b>1113.4888</b> | 2208.9437      | 1104.9755        | 2207.9597        | 1104.4835        | 19 |
| 12 | 1405.5722        | 703.2898         | 1388.5457       | 694.7765         | 1387.5617       | 694.2845         | I    | 2168.9488        | 1084.9780        | 2151.9223      | 1076.4648        | 2150.9382        | 1075.9728        | 18 |
| 13 | 1542.6312        | 771.8192         | 1525.6046       | 763.3059         | 1524.6206       | 762.8139         | H    | 2055.8647        | <b>1028.4360</b> | 2038.8382      | <b>1019.9227</b> | 2037.8542        | <b>1019.4307</b> | 17 |
| 14 | 1656.6741        | 828.8407         | 1639.6475       | 820.3274         | 1638.6635       | 819.8354         | N    | 1918.8058        | 959.9066         | 1901.7793      | 951.3933         | 1900.7953        | 950.9013         | 16 |
| 15 | 1816.7047        | 908.8560         | 1799.6782       | 900.3427         | 1798.6942       | 899.8507         | C    | <b>1804.7629</b> | <b>902.8851</b>  | 1787.7363      | 894.3718         | <b>1786.7523</b> | 893.8798         | 15 |
| 16 | 1903.7368        | 952.3720         | 1886.7102       | 943.8587         | 1885.7262       | 943.3667         | S    | <b>1644.7322</b> | 822.8698         | 1627.7057      | 814.3565         | 1626.7217        | 813.8645         | 14 |
| 17 | 2016.8208        | 1008.9140        | 1999.7943       | <b>1000.4008</b> | 1998.8103       | <b>999.9088</b>  | I    | 1557.7002        | 779.3537         | 1540.6737      | 770.8405         | 1539.6897        | 770.3485         | 13 |
| 18 | 2131.8478        | 1066.4275        | 2114.8212       | 1057.9142        | 2113.8372       | 1057.4222        | N    | 1444.6162        | <b>722.8117</b>  | 1427.5896      | 714.2984         | 1426.6056        | 713.8064         | 12 |
| 19 | 2260.8904        | <b>1130.9488</b> | 2243.8638       | 1122.4355        | 2242.8798       | 1121.9435        | E    | <b>1329.5892</b> | 665.2982         | 1312.5627      | 656.7850         | 1311.5786        | 656.2930         | 11 |
| 20 | 2361.9380        | 1181.4727        | 2344.9115       | 1172.9594        | 2343.9275       | 1172.4674        | T    | <b>1200.5466</b> | 600.7769         | 1183.5201      | 592.2637         | 1182.5361        | 591.7717         | 10 |
| 21 | 2521.9687        | 1261.4880        | 2504.9421       | <b>1252.9747</b> | 2503.9581       | 1252.4827        | C    | <b>1099.4989</b> | 550.2531         | 1082.4724      | <b>541.7398</b>  |                  |                  | 9  |
| 22 | 2669.0371        | 1335.0222        | 2652.0106       | 1326.5089        | 2651.0265       | 1326.0169        | F    | <b>939.4683</b>  | 470.2378         | 922.4417       | 461.7245         |                  |                  | 8  |



|    |           |           |           |           |           |           |   |          |          |          |          |  |  |   |
|----|-----------|-----------|-----------|-----------|-----------|-----------|---|----------|----------|----------|----------|--|--|---|
| 23 | 2784.0640 | 1392.5357 | 2767.0375 | 1384.0224 | 2766.0535 | 1383.5304 | N | 792.3999 | 396.7036 | 775.3733 | 388.1903 |  |  | 7 |
| 24 | 2897.1481 | 1449.0777 | 2880.1216 | 1440.5644 | 2879.1375 | 1440.0724 | I | 677.3729 | 339.1901 | 660.3464 | 330.6768 |  |  | 6 |
| 25 | 3025.2067 | 1513.1070 | 3008.1801 | 1504.5937 | 3007.1961 | 1504.1017 | Q | 564.2889 | 282.6481 | 547.2623 | 274.1348 |  |  | 5 |
| 26 | 3082.2281 | 1541.6177 | 3065.2016 | 1533.1044 | 3064.2176 | 1532.6124 | G | 436.2303 | 218.6188 | 419.2037 | 210.1055 |  |  | 4 |
| 27 | 3139.2496 | 1570.1284 | 3122.2231 | 1561.6152 | 3121.2390 | 1561.1232 | G | 379.2088 | 190.1081 | 362.1823 | 181.5948 |  |  | 3 |
| 28 | 3286.3180 | 1643.6627 | 3269.2915 | 1635.1494 | 3268.3075 | 1634.6574 | F | 322.1874 | 161.5973 | 305.1608 | 153.0840 |  |  | 2 |
| 29 |           |           |           |           |           |           | R | 175.1190 | 88.0631  | 158.0924 | 79.5498  |  |  | 1 |

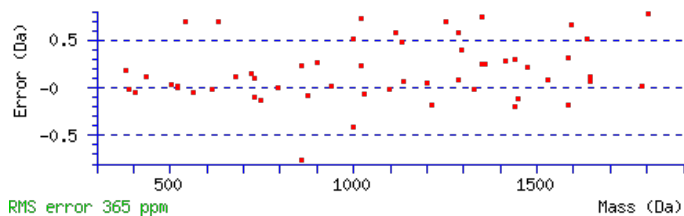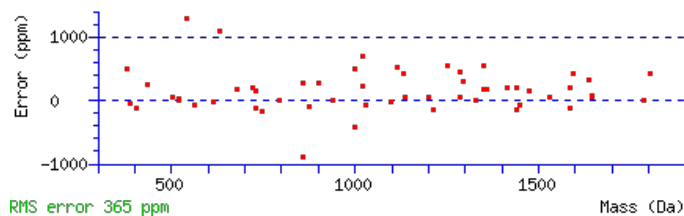

NCBI BLAST search of [NCQDIDECVTGIHNC SINETCFNIQGGFR](#)

(Parameters: blastp, nr protein database, expect=20000, no filter, PAM30)

Other BLAST [web gateways](#)

All matches to this query

| Score | Mr(calc)  | Delta  | Sequence                                       | Site Analysis              |
|-------|-----------|--------|------------------------------------------------|----------------------------|
| 56.7  | 3459.4224 | 2.0240 | <a href="#">NCQDIDECVTGIHNC SINETCFNIQGGFR</a> | Deamidated N18, N23 29.71% |
| 54.8  | 3459.4224 | 2.0240 | <a href="#">NCQDIDECVTGIHNC SINETCFNIQGGFR</a> | Deamidated N14, N18 19.14% |
| 54.6  | 3459.4224 | 2.0240 | <a href="#">NCQDIDECVTGIHNC SINETCFNIQGGFR</a> | Deamidated N14, N23 18.32% |
| 50.6  | 3459.4224 | 2.0240 | <a href="#">NCQDIDECVTGIHNC SINETCFNIQGGFR</a> | Deamidated N18, Q25 7.24%  |
| 49.2  | 3459.4224 | 2.0240 | <a href="#">NCQDIDECVTGIHNC SINETCFNIQGGFR</a> | Deamidated Q3, N18 5.33%   |
| 48.6  | 3459.4224 | 2.0240 | <a href="#">NCQDIDECVTGIHNC SINETCFNIQGGFR</a> | Deamidated N14, Q25 4.56%  |
| 48.5  | 3459.4224 | 2.0240 | <a href="#">NCQDIDECVTGIHNC SINETCFNIQGGFR</a> | Deamidated N1, N18 4.44%   |
| 47.4  | 3459.4224 | 2.0240 | <a href="#">NCQDIDECVTGIHNC SINETCFNIQGGFR</a> | Deamidated Q3, N23 3.50%   |
| 46.5  | 3459.4224 | 2.0240 | <a href="#">NCQDIDECVTGIHNC SINETCFNIQGGFR</a> | Deamidated N1, N23 2.83%   |
| 41.9  | 3459.4224 | 2.0240 | <a href="#">NCQDIDECVTGIHNC SINETCFNIQGGFR</a> | Deamidated Q3, N14 0.99%   |

Mascot: <http://www.matrixscience.com/>

# MASCOT SCIENCE Mascot Search Results

## Peptide View

MS/MS Fragmentation of **LGYNANTSVLSFQAVCR**

Found in **B1ALQ8** in **con\_Xuniprot\_HUMAN3**, B1ALQ8\_HUMAN Complement factor H-related protein 4 OS=Homo sapiens  
GN=CFHR4 PE=2 SV=1

Match to Query 11308: 1899.921948 from(950.968250,2+) intensity(22541.6016) rtinseconds(1702) scans(4450) index(4435)

Title: 111019\_Est\_ISCardio\_NMI\_YP\_G\_7Spectrum3777\_scans\_\_4450

Data file C:\mascot\20140703\_Tmgf\_1D\CSV\_UseAnalysis\MasterCSV\All\_Glyco\mgf\ptm\UC18ERLIC\_PTM\_35D.mgf

Click mouse within plot area to zoom in by factor of two about that point

Or, to Da

Label all possible matches Label matches used for scoring

Show Y-axis

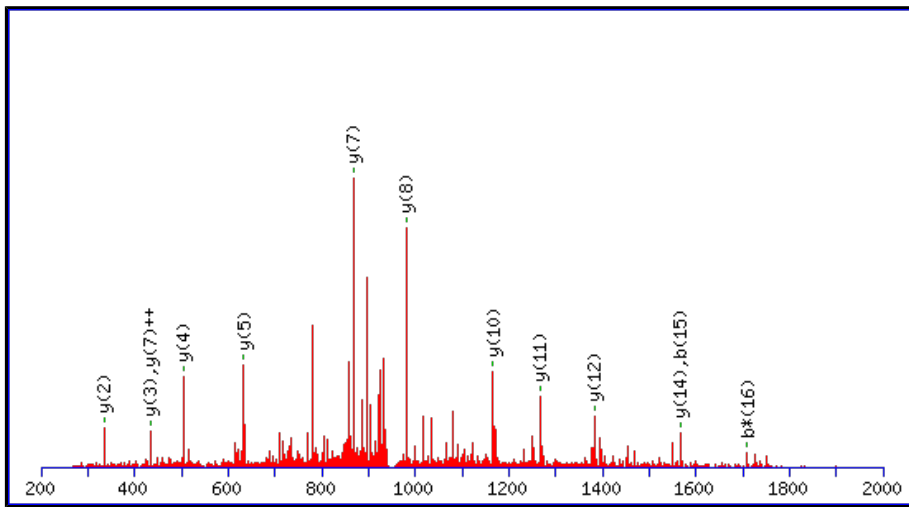

Monoisotopic mass of neutral peptide  $M_r(\text{calc})$ : 1899.9149

Fixed modifications: Carbamidomethyl (C) (apply to specified residues or termini only)

Variable modifications:

N6 : Deamidated (NQ)

Ions Score: 71 Expect: 1.8e-005

Matches : 13/162 fragment ions using 16 most intense peaks ([help](#))

| #  | b                | b <sup>++</sup> | b <sup>*</sup>   | b <sup>***</sup> | b <sup>0</sup> | b <sup>0++</sup> | Seq. | y                | y <sup>++</sup> | y <sup>*</sup> | y <sup>***</sup> | y <sup>0</sup> | y <sup>0++</sup> | #  |
|----|------------------|-----------------|------------------|------------------|----------------|------------------|------|------------------|-----------------|----------------|------------------|----------------|------------------|----|
| 1  | 114.0913         | 57.5493         |                  |                  |                |                  | L    |                  |                 |                |                  |                |                  | 17 |
| 2  | 171.1128         | 86.0600         |                  |                  |                |                  | G    | 1787.8381        | 894.4227        | 1770.8116      | 885.9094         | 1769.8275      | 885.4174         | 16 |
| 3  | 334.1761         | 167.5917        |                  |                  |                |                  | Y    | 1730.8166        | 865.9120        | 1713.7901      | 857.3987         | 1712.8061      | 856.9067         | 15 |
| 4  | 448.2191         | 224.6132        | 431.1925         | 216.0999         |                |                  | N    | <b>1567.7533</b> | 784.3803        | 1550.7268      | 775.8670         | 1549.7428      | 775.3750         | 14 |
| 5  | 519.2562         | 260.1317        | 502.2296         | 251.6185         |                |                  | A    | 1453.7104        | 727.3588        | 1436.6838      | 718.8456         | 1435.6998      | 718.3536         | 13 |
| 6  | 634.2831         | 317.6452        | 617.2566         | 309.1319         |                |                  | N    | <b>1382.6733</b> | 691.8403        | 1365.6467      | 683.3270         | 1364.6627      | 682.8350         | 12 |
| 7  | 735.3308         | 368.1690        | 718.3042         | 359.6558         | 717.3202       | 359.1638         | T    | <b>1267.6463</b> | 634.3268        | 1250.6198      | 625.8135         | 1249.6358      | 625.3215         | 11 |
| 8  | 822.3628         | 411.6851        | 805.3363         | 403.1718         | 804.3523       | 402.6798         | S    | <b>1166.5987</b> | 583.8030        | 1149.5721      | 575.2897         | 1148.5881      | 574.7977         | 10 |
| 9  | 921.4312         | 461.2193        | 904.4047         | 452.7060         | 903.4207       | 452.2140         | V    | 1079.5666        | 540.2870        | 1062.5401      | 531.7737         | 1061.5561      | 531.2817         | 9  |
| 10 | 1034.5153        | 517.7613        | 1017.4888        | 509.2480         | 1016.5047      | 508.7560         | L    | <b>980.4982</b>  | 490.7527        | 963.4717       | 482.2395         | 962.4876       | 481.7475         | 8  |
| 11 | 1121.5473        | 561.2773        | 1104.5208        | 552.7640         | 1103.5368      | 552.2720         | S    | <b>867.4141</b>  | <b>434.2107</b> | 850.3876       | 425.6974         | 849.4036       | 425.2054         | 7  |
| 12 | 1268.6157        | 634.8115        | 1251.5892        | 626.2982         | 1250.6052      | 625.8062         | F    | 780.3821         | 390.6947        | 763.3556       | 382.1814         |                |                  | 6  |
| 13 | 1396.6743        | 698.8408        | 1379.6478        | 690.3275         | 1378.6638      | 689.8355         | Q    | <b>633.3137</b>  | 317.1605        | 616.2872       | 308.6472         |                |                  | 5  |
| 14 | 1467.7114        | 734.3594        | 1450.6849        | 725.8461         | 1449.7009      | 725.3541         | A    | <b>505.2551</b>  | 253.1312        | 488.2286       | 244.6179         |                |                  | 4  |
| 15 | <b>1566.7799</b> | 783.8936        | 1549.7533        | 775.3803         | 1548.7693      | 774.8883         | V    | <b>434.2180</b>  | 217.6126        | 417.1915       | 209.0994         |                |                  | 3  |
| 16 | 1726.8105        | 863.9089        | <b>1709.7840</b> | 855.3956         | 1708.7999      | 854.9036         | C    | <b>335.1496</b>  | 168.0784        | 318.1231       | 159.5652         |                |                  | 2  |
| 17 |                  |                 |                  |                  |                |                  | R    | 175.1190         | 88.0631         | 158.0924       | 79.5498          |                |                  | 1  |

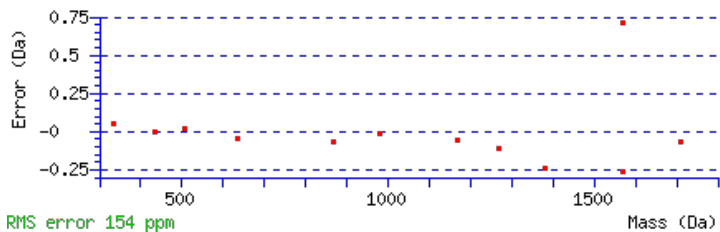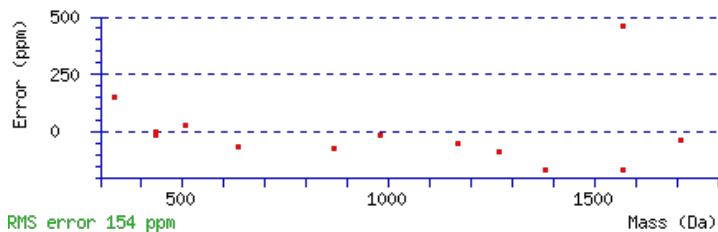

NCBI BLAST search of [LGYNANTSVLSFQAVCR](#)

(Parameters: blastp, nr protein database, expect=20000, no filter, PAM30)

Other BLAST [web gateways](#)

**All matches to this query**

| Score | Mr(calc)  | Delta  | Sequence                          | Site Analysis        |
|-------|-----------|--------|-----------------------------------|----------------------|
| 71.2  | 1899.9149 | 0.0071 | <a href="#">LGYNANTSVLSFQAVCR</a> | Deamidated N6 49.91% |
| 71.2  | 1899.9149 | 0.0071 | <a href="#">LGYNANTSVLSFQAVCR</a> | Deamidated N4 49.91% |
| 46.9  | 1899.9149 | 0.0071 | <a href="#">LGYNANTSVLSFQAVCR</a> | Deamidated Q13 0.18% |
| 4.7   | 1898.9196 | 1.0023 | <a href="#">DKGFAPNHLNVEKMALD</a> |                      |
| 4.7   | 1898.9196 | 1.0023 | <a href="#">DKGFAPNHLNVEKMALN</a> |                      |
| 3.3   | 1897.9125 | 2.0095 | <a href="#">TSLKNALKNMMGLNSDK</a> |                      |
| 2.9   | 1897.9125 | 2.0095 | <a href="#">TSLKNALKNMMGLNSDK</a> |                      |
| 2.0   | 1897.9244 | 1.9976 | <a href="#">VMTNKKTVPNPTNGWK</a>  |                      |
| 0.9   | 1897.9058 | 2.0162 | <a href="#">DQGTPEVOPTPAKDTWK</a> |                      |

Mascot: <http://www.matrixscience.com/>

# MASCOT SCIENCE Mascot Search Results

## Peptide View

MS/MS Fragmentation of **MKVSNVSCQASVSR**

Found in **B3KUE5** in **con\_Xuniprot\_HUMAN3**, B3KUE5\_HUMAN Phospholipid transfer protein OS=Homo sapiens GN=PLTP PE=2 SV=1

Match to Query 7403: 1568.732908 from(785.373730,2+) intensity(7423.2842) rtinseconds(250) scans(386) index(25154)

Title: 111019\_Est\_MI\_YS\_G\_07Spectrum289\_scans\_\_386

Data file C:\\mascot\\20140703\_Tmgf\_1D\\CSV\_UseAnalysis\\MasterCSV\\All\_Glyco\\mgf\\ptm\\UC18ERLIC\_PTM\_35D.mgf

Click mouse within plot area to zoom in by factor of two about that point

Or, to Da

Label all possible matches Label matches used for scoring

Show Y-axis

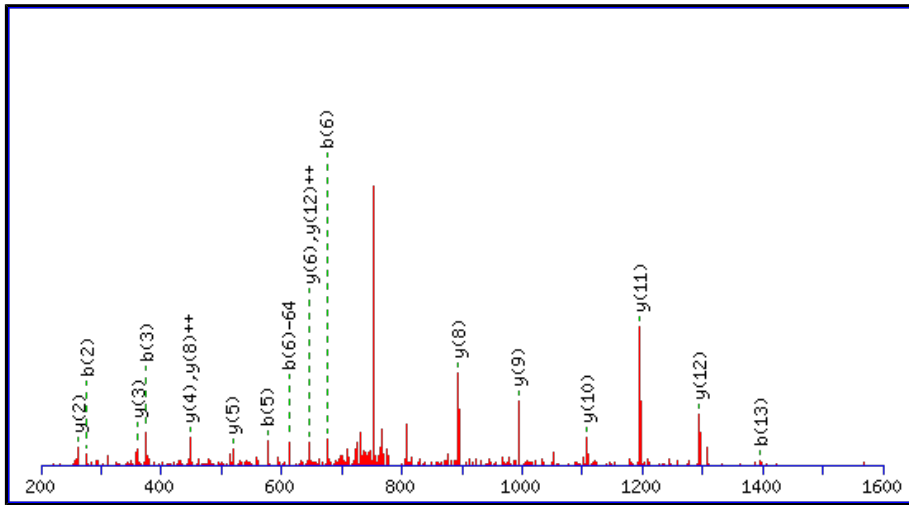

Monoisotopic mass of neutral peptide Mr(calc): 1568.7287

Fixed modifications: Carbamidomethyl (C) (apply to specified residues or termini only)

Variable modifications:

M1 : Oxidation (M), with neutral losses 0.0000(shown in table), 63.9983

N5 : Deamidated (NQ)

Ions Score: 82 Expect: 1.1e-006

Matches : 18/216 fragment ions using 26 most intense peaks ([help](#))

| #  | b                | b <sup>++</sup> | b <sup>*</sup> | b <sup>*++</sup> | b <sup>0</sup> | b <sup>0++</sup> | Seq. | y                | y <sup>++</sup> | y <sup>*</sup> | y <sup>*++</sup> | y <sup>0</sup> | y <sup>0++</sup> | #  |
|----|------------------|-----------------|----------------|------------------|----------------|------------------|------|------------------|-----------------|----------------|------------------|----------------|------------------|----|
| 1  | 148.0427         | 74.5250         |                |                  |                |                  | M    |                  |                 |                |                  |                |                  | 14 |
| 2  | <b>276.1376</b>  | 138.5725        | 259.1111       | 130.0592         |                |                  | K    | 1422.7006        | 711.8539        | 1405.6740      | 703.3406         | 1404.6900      | 702.8486         | 13 |
| 3  | <b>375.2061</b>  | 188.1067        | 358.1795       | 179.5934         |                |                  | V    | <b>1294.6056</b> | <b>647.8064</b> | 1277.5790      | 639.2932         | 1276.5950      | 638.8012         | 12 |
| 4  | 462.2381         | 231.6227        | 445.2115       | 223.1094         | 444.2275       | 222.6174         | S    | <b>1195.5372</b> | 598.2722        | 1178.5106      | 589.7590         | 1177.5266      | 589.2669         | 11 |
| 5  | <b>577.2650</b>  | 289.1362        | 560.2385       | 280.6229         | 559.2545       | 280.1309         | N    | <b>1108.5051</b> | 554.7562        | 1091.4786      | 546.2429         | 1090.4946      | 545.7509         | 10 |
| 6  | <b>676.3334</b>  | 338.6704        | 659.3069       | 330.1571         | 658.3229       | 329.6651         | V    | <b>993.4782</b>  | 497.2427        | 976.4517       | 488.7295         | 975.4676       | 488.2375         | 9  |
| 7  | 763.3655         | 382.1864        | 746.3389       | 373.6731         | 745.3549       | 373.1811         | S    | <b>894.4098</b>  | <b>447.7085</b> | 877.3832       | 439.1953         | 876.3992       | 438.7033         | 8  |
| 8  | 923.3961         | 462.2017        | 906.3696       | 453.6884         | 905.3855       | 453.1964         | C    | 807.3778         | 404.1925        | 790.3512       | 395.6792         | 789.3672       | 395.1872         | 7  |
| 9  | 1051.4547        | 526.2310        | 1034.4281      | 517.7177         | 1033.4441      | 517.2257         | Q    | <b>647.3471</b>  | 324.1772        | 630.3206       | 315.6639         | 629.3365       | 315.1719         | 6  |
| 10 | 1122.4918        | 561.7495        | 1105.4653      | 553.2363         | 1104.4812      | 552.7443         | A    | <b>519.2885</b>  | 260.1479        | 502.2620       | 251.6346         | 501.2780       | 251.1426         | 5  |
| 11 | 1209.5238        | 605.2656        | 1192.4973      | 596.7523         | 1191.5133      | 596.2603         | S    | <b>448.2514</b>  | 224.6293        | 431.2249       | 216.1161         | 430.2409       | 215.6241         | 4  |
| 12 | 1308.5922        | 654.7998        | 1291.5657      | 646.2865         | 1290.5817      | 645.7945         | V    | <b>361.2194</b>  | 181.1133        | 344.1928       | 172.6001         | 343.2088       | 172.1081         | 3  |
| 13 | <b>1395.6243</b> | 698.3158        | 1378.5977      | 689.8025         | 1377.6137      | 689.3105         | S    | <b>262.1510</b>  | 131.5791        | 245.1244       | 123.0659         | 244.1404       | 122.5738         | 2  |
| 14 |                  |                 |                |                  |                |                  | R    | 175.1190         | 88.0631         | 158.0924       | 79.5498          |                |                  | 1  |

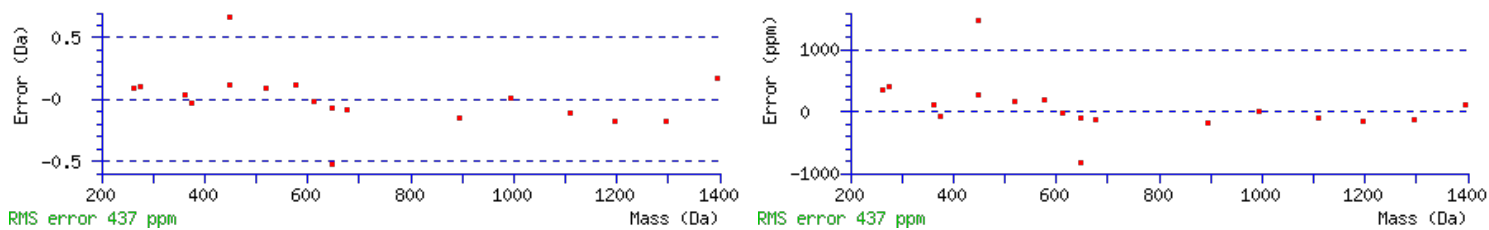

NCBI BLAST search of [MKVSNVSCQASVSR](#)

(Parameters: blastp, nr protein database, expect=20000, no filter, PAM30)

Other BLAST [web gateways](#)

**All matches to this query**

| Score | Mr(calc)  | Delta   | Sequence                       | Site Analysis        |
|-------|-----------|---------|--------------------------------|----------------------|
| 81.9  | 1568.7287 | 0.0042  | <a href="#">MKVSNVSCQASVSR</a> | Deamidated N5 99.44% |
| 59.5  | 1568.7287 | 0.0042  | <a href="#">MKVSNVSCQASVSR</a> | Deamidated Q9 0.56%  |
| 15.5  | 1568.7392 | -0.0063 | <a href="#">LQDKMNFVSNLK</a>   |                      |
| 15.5  | 1568.7392 | -0.0063 | <a href="#">LQDKMNFVSNLK</a>   |                      |
| 12.3  | 1568.7293 | 0.0036  | <a href="#">HMQFDSLRYLNK</a>   |                      |
| 11.2  | 1566.7274 | 2.0055  | <a href="#">NEESDLERGYTVR</a>  |                      |
| 10.3  | 1568.7327 | 0.0002  | <a href="#">NCVYKNIDCLLR</a>   |                      |
| 9.3   | 1568.7327 | 0.0002  | <a href="#">KMVDMLQDSEPAR</a>  |                      |
| 9.3   | 1568.7352 | -0.0023 | <a href="#">MKLESASTSSLEDR</a> |                      |
| 7.1   | 1568.7327 | 0.0002  | <a href="#">KFSNCNKLMPGEK</a>  |                      |

Mascot: <http://www.matrixscience.com/>



# MATRIX SCIENCE Mascot Search Results

## Peptide View

MS/MS Fragmentation of **VSNVSCQASVSR**

Found in **B3KUE5** in **con\_Xuniprot\_HUMAN3**, B3KUE5\_HUMAN Phospholipid transfer protein OS=Homo sapiens GN=PLTP PE=2 SV=1

Match to Query 1940: 1293.600248 from(647.807400,2+) intensity(1695.7581) rtinseconds(205) scans(294) index(1818)

Title: 111019\_Est\_ISCardio\_NMI\_YP\_G\_4Spectrum214\_scans\_294

Data file C:\\mascot\\20140703\_Tmgf\_1D\\CSV\_UseAnalysis\\MasterCSV\\All\_Glyco\\mgf\\ptm\\UC18ERLIC\_PTM\_35D.mgf

Click mouse within plot area to zoom in by factor of two about that point

Or, to Da

Label all possible matches Label matches used for scoring

Show Y-axis

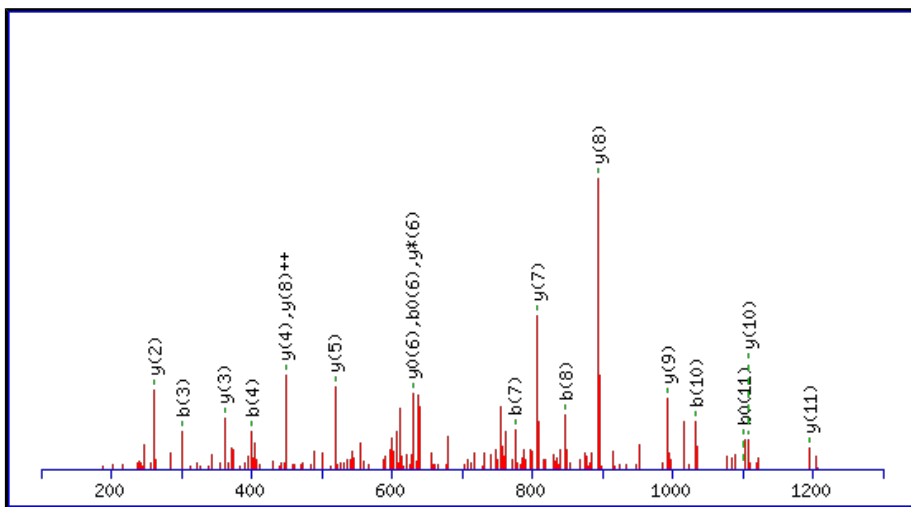

Monoisotopic mass of neutral peptide  $M_r(\text{calc})$ : 1293.5983

Fixed modifications: Carbamidomethyl (C) (apply to specified residues or termini only)

Variable modifications:

N3 : Deamidated (NQ)

Ions Score: 80 Expect: 1.7e-006

Matches : 19/124 fragment ions using 22 most intense peaks ([help](#))

| #  | b                | b <sup>++</sup> | b <sup>*</sup> | b <sup>***</sup> | b <sup>0</sup>   | b <sup>0++</sup> | Seq. | y                | y <sup>++</sup> | y <sup>*</sup>  | y <sup>***</sup> | y <sup>0</sup>  | y <sup>0++</sup> | #  |
|----|------------------|-----------------|----------------|------------------|------------------|------------------|------|------------------|-----------------|-----------------|------------------|-----------------|------------------|----|
| 1  | 100.0757         | 50.5415         |                |                  |                  |                  | V    |                  |                 |                 |                  |                 |                  | 12 |
| 2  | 187.1077         | 94.0575         |                |                  | 169.0972         | 85.0522          | S    | <b>1195.5372</b> | 598.2722        | 1178.5106       | 589.7590         | 1177.5266       | 589.2669         | 11 |
| 3  | <b>302.1347</b>  | 151.5710        | 285.1081       | 143.0577         | 284.1241         | 142.5657         | N    | <b>1108.5051</b> | 554.7562        | 1091.4786       | 546.2429         | 1090.4946       | 545.7509         | 10 |
| 4  | <b>401.2031</b>  | 201.1052        | 384.1765       | 192.5919         | 383.1925         | 192.0999         | V    | <b>993.4782</b>  | 497.2427        | 976.4517        | 488.7295         | 975.4676        | 488.2375         | 9  |
| 5  | 488.2351         | 244.6212        | 471.2086       | 236.1079         | 470.2245         | 235.6159         | S    | <b>894.4098</b>  | <b>447.7085</b> | 877.3832        | 439.1953         | 876.3992        | 438.7033         | 8  |
| 6  | 648.2658         | 324.6365        | 631.2392       | 316.1232         | <b>630.2552</b>  | 315.6312         | C    | <b>807.3778</b>  | 404.1925        | 790.3512        | 395.6792         | 789.3672        | 395.1872         | 7  |
| 7  | <b>776.3243</b>  | 388.6658        | 759.2978       | 380.1525         | 758.3138         | 379.6605         | Q    | 647.3471         | 324.1772        | <b>630.3206</b> | 315.6639         | <b>629.3365</b> | 315.1719         | 6  |
| 8  | <b>847.3614</b>  | 424.1844        | 830.3349       | 415.6711         | 829.3509         | 415.1791         | A    | <b>519.2885</b>  | 260.1479        | 502.2620        | 251.6346         | 501.2780        | 251.1426         | 5  |
| 9  | 934.3935         | 467.7004        | 917.3669       | 459.1871         | 916.3829         | 458.6951         | S    | <b>448.2514</b>  | 224.6293        | 431.2249        | 216.1161         | 430.2409        | 215.6241         | 4  |
| 10 | <b>1033.4619</b> | 517.2346        | 1016.4353      | 508.7213         | 1015.4513        | 508.2293         | V    | <b>361.2194</b>  | 181.1133        | 344.1928        | 172.6001         | 343.2088        | 172.1081         | 3  |
| 11 | 1120.4939        | 560.7506        | 1103.4674      | 552.2373         | <b>1102.4833</b> | 551.7453         | S    | <b>262.1510</b>  | 131.5791        | 245.1244        | 123.0659         | 244.1404        | 122.5738         | 2  |
| 12 |                  |                 |                |                  |                  |                  | R    | 175.1190         | 88.0631         | 158.0924        | 79.5498          |                 |                  | 1  |

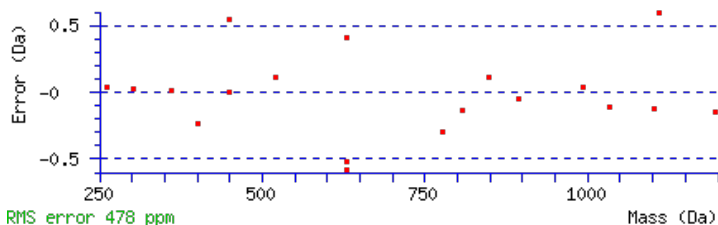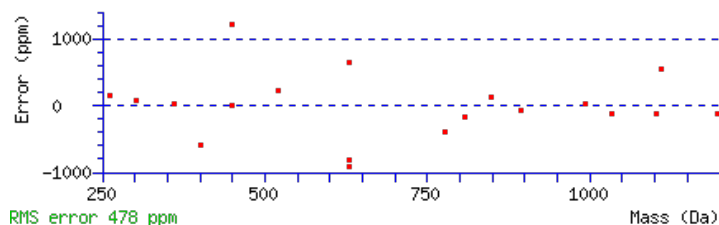

NCBI **BLAST** search of [VSNVSCQASVSR](#)

(Parameters: blastp, nr protein database, expect=20000, no filter, PAM30)

Other BLAST [web gateways](#)

**All matches to this query**

| Score | Mr(calc)  | Delta   | Sequence                      | Site Analysis        |
|-------|-----------|---------|-------------------------------|----------------------|
| 79.8  | 1293.5983 | 0.0019  | <a href="#">VSNVSCQASVSR</a>  | Deamidated N3 99.84% |
| 51.9  | 1293.5983 | 0.0019  | <a href="#">VSNVSCQASVSR</a>  | Deamidated Q7 0.16%  |
| 12.2  | 1293.5983 | 0.0020  | <a href="#">SSSVGCLAEASAR</a> |                      |
| 9.0   | 1293.5983 | 0.0020  | <a href="#">RMGESDDDSILR</a>  |                      |
| 5.7   | 1293.5949 | 0.0053  | <a href="#">TSDPSLHAHSDK</a>  |                      |
| 5.7   | 1293.5983 | 0.0020  | <a href="#">VMDRSLGEESR</a>   |                      |
| 5.3   | 1291.5979 | 2.0023  | <a href="#">SGGPVTSMGSAWR</a> |                      |
| 5.2   | 1292.5918 | 1.0085  | <a href="#">MIKEEQEQNK</a>    |                      |
| 4.2   | 1293.6048 | -0.0045 | <a href="#">LTSNASKSQNNK</a>  |                      |
| 4.2   | 1293.6048 | -0.0045 | <a href="#">LTSNASKSQNNK</a>  |                      |

**Mascot:** <http://www.matrixscience.com/>

# MATRIX SCIENCE Mascot Search Results

## Peptide View

MS/MS Fragmentation of **MKVSNVSCQASVSR**

Found in **B3KUE5** in **con\_Xuniprot\_HUMAN3**, B3KUE5\_HUMAN Phospholipid transfer protein OS=Homo sapiens GN=PLTP PE=2 SV=1

Match to Query 7016: 1552.736892 from(518.586240,3+) intensity(5994.3398) rtinseconds(381) scans(701) index(2461)

Title: 111019\_Est\_ISCardio\_NMI\_YP\_G\_5Spectrum570\_scans\_701

Data file C:\mascot\20140703\_Tmgf\_1D\CSV\_UseAnalysis\MasterCSV\All\_Glyco\mgf\ptm\UC18ERLIC\_PTM\_35D.mgf

Click mouse within plot area to zoom in by factor of two about that point

Or, to Da

Label all possible matches Label matches used for scoring

Show Y-axis

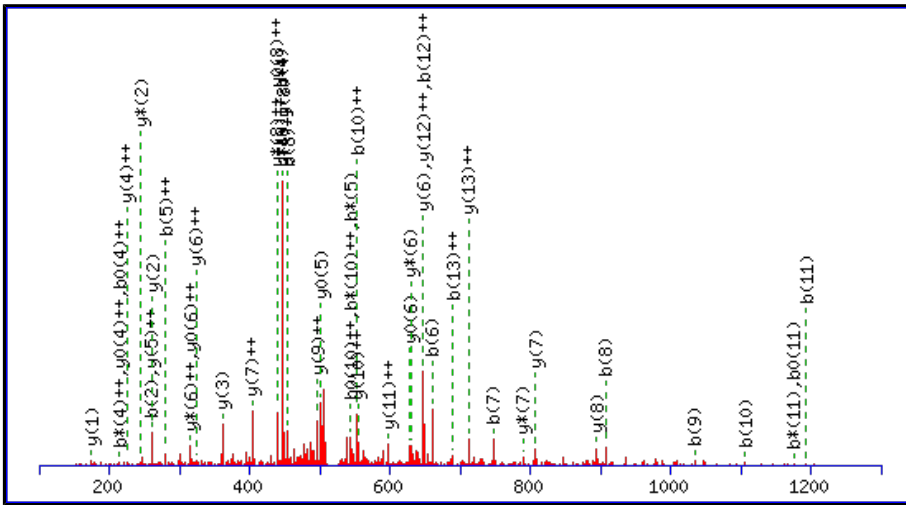

Monoisotopic mass of neutral peptide Mr(calc): 1552.7337

Fixed modifications: Carbamidomethyl (C) (apply to specified residues or termini only)

Variable modifications:

N5 : Deamidated (NQ)

Ions Score: 53 Expect: 0.001

Matches : 48/146 fragment ions using 75 most intense peaks ([help](#))

| #  | b                | b <sup>++</sup> | b <sup>*</sup>   | b <sup>*++</sup> | b <sup>0</sup>   | b <sup>0++</sup> | Seq. | y               | y <sup>++</sup> | y <sup>*</sup>  | y <sup>*++</sup> | y <sup>0</sup>  | y <sup>0++</sup> | #  |
|----|------------------|-----------------|------------------|------------------|------------------|------------------|------|-----------------|-----------------|-----------------|------------------|-----------------|------------------|----|
| 1  | 132.0478         | 66.5275         |                  |                  |                  |                  | M    |                 |                 |                 |                  |                 |                  | 14 |
| 2  | <b>260.1427</b>  | 130.5750        | 243.1162         | 122.0617         |                  |                  | K    | 1422.7006       | <b>711.8539</b> | 1405.6740       | 703.3406         | 1404.6900       | 702.8486         | 13 |
| 3  | 359.2111         | 180.1092        | 342.1846         | 171.5959         |                  |                  | V    | 1294.6056       | <b>647.8064</b> | 1277.5790       | 639.2932         | 1276.5950       | 638.8012         | 12 |
| 4  | <b>446.2432</b>  | 223.6252        | 429.2166         | <b>215.1119</b>  | 428.2326         | <b>214.6199</b>  | S    | 1195.5372       | <b>598.2722</b> | 1178.5106       | 589.7590         | 1177.5266       | 589.2669         | 11 |
| 5  | 561.2701         | <b>281.1387</b> | <b>544.2436</b>  | 272.6254         | 543.2595         | 272.1334         | N    | 1108.5051       | <b>554.7562</b> | 1091.4786       | 546.2429         | 1090.4946       | 545.7509         | 10 |
| 6  | <b>660.3385</b>  | 330.6729        | 643.3120         | 322.1596         | 642.3280         | 321.6676         | V    | 993.4782        | <b>497.2427</b> | 976.4517        | 488.7295         | 975.4676        | 488.2375         | 9  |
| 7  | <b>747.3706</b>  | 374.1889        | 730.3440         | 365.6756         | 729.3600         | 365.1836         | S    | <b>894.4098</b> | <b>447.7085</b> | 877.3832        | <b>439.1953</b>  | 876.3992        | <b>438.7033</b>  | 8  |
| 8  | <b>907.4012</b>  | <b>454.2042</b> | 890.3747         | <b>445.6910</b>  | 889.3906         | 445.1990         | C    | <b>807.3778</b> | <b>404.1925</b> | <b>790.3512</b> | 395.6792         | 789.3672        | 395.1872         | 7  |
| 9  | <b>1035.4598</b> | 518.2335        | 1018.4332        | 509.7203         | 1017.4492        | 509.2282         | Q    | <b>647.3471</b> | <b>324.1772</b> | <b>630.3206</b> | <b>315.6639</b>  | <b>629.3365</b> | <b>315.1719</b>  | 6  |
| 10 | <b>1106.4969</b> | <b>553.7521</b> | 1089.4703        | <b>545.2388</b>  | 1088.4863        | <b>544.7468</b>  | A    | 519.2885        | <b>260.1479</b> | 502.2620        | 251.6346         | <b>501.2780</b> | 251.1426         | 5  |
| 11 | <b>1193.5289</b> | 597.2681        | <b>1176.5024</b> | 588.7548         | <b>1175.5184</b> | 588.2628         | S    | <b>448.2514</b> | <b>224.6293</b> | 431.2249        | 216.1161         | 430.2409        | <b>215.6241</b>  | 4  |
| 12 | 1292.5973        | <b>646.8023</b> | 1275.5708        | 638.2890         | 1274.5868        | 637.7970         | V    | <b>361.2194</b> | 181.1133        | 344.1928        | 172.6001         | 343.2088        | 172.1081         | 3  |
| 13 | 1379.6294        | <b>690.3183</b> | 1362.6028        | 681.8050         | 1361.6188        | 681.3130         | S    | <b>262.1510</b> | 131.5791        | <b>245.1244</b> | 123.0659         | 244.1404        | 122.5738         | 2  |
| 14 |                  |                 |                  |                  |                  |                  | R    | <b>175.1190</b> | 88.0631         | 158.0924        | 79.5498          |                 |                  | 1  |

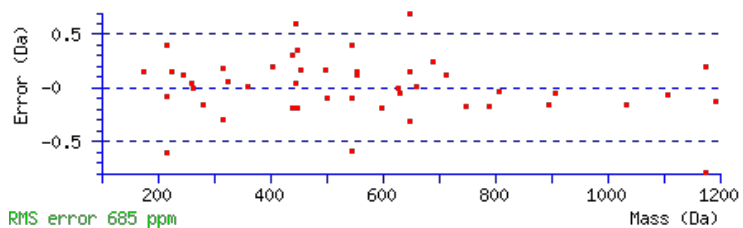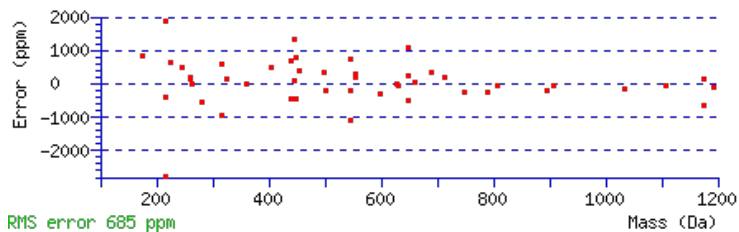

NCBI BLAST search of [MKVSNVSCQASVSR](#)

(Parameters: blastp, nr protein database, expect=20000, no filter, PAM30)

Other BLAST [web gateways](#)

**All matches to this query**

| Score | Mr(calc)  | Delta   | Sequence                        | Site Analysis        |
|-------|-----------|---------|---------------------------------|----------------------|
| 52.6  | 1552.7337 | 0.0031  | <a href="#">MKVSNVSCQASVSR</a>  | Deamidated N5 57.88% |
| 51.2  | 1552.7337 | 0.0031  | <a href="#">MKVSNVSCQASVSR</a>  | Deamidated Q9 42.12% |
| 11.2  | 1550.7246 | 2.0123  | <a href="#">MDSPSATVVSAVQSR</a> |                      |
| 9.2   | 1552.7369 | 0.0000  | <a href="#">NESYLLQKEADSR</a>   |                      |
| 9.0   | 1552.7344 | 0.0025  | <a href="#">WFNTVNMALTOAR</a>   |                      |
| 8.2   | 1551.7351 | 1.0018  | <a href="#">EMELRFQEGKQR</a>    |                      |
| 8.2   | 1552.7403 | -0.0034 | <a href="#">MKLESASTSSLEDR</a>  |                      |
| 7.2   | 1550.7226 | 2.0143  | <a href="#">KWASHHQINDASR</a>   |                      |
| 6.9   | 1552.7304 | 0.0065  | <a href="#">LVRYGAVECDESR</a>   |                      |
| 6.9   | 1551.7311 | 1.0058  | <a href="#">MQNVSSARQSSVDK</a>  |                      |

Mascot: <http://www.matrixscience.com/>

# MATRIX SCIENCE Mascot Search Results

## Peptide View

MS/MS Fragmentation of **GLCVNASAVSR**

Found in **B3KWK7** in **con\_Xuniprot\_HUMAN3**, B3KWK7\_HUMAN Insulin-like growth factor binding protein 3, isoform CRA\_b  
OS=Homo sapiens GN=IGFBP3 PE=2 SV=1

Match to Query 1448: 1133.551668 from(567.783110,2+) intensity(64951.5000) rtinseconds(674) scans(1386) index(12334)

Title: 111019\_Est\_ISCardio\_NMI\_YS\_G\_9Spectrum1184\_scans\_\_1386

Data file C:\\mascot\\20140703\_Tmgf\_1D\\CSV\_UseAnalysis\\MasterCSV\\All\_Glyco\\mgf\\ptm\\UC18ERLIC\_PTM\_35D.mgf

Click mouse within plot area to zoom in by factor of two about that point

Or,  to  Da

Label all possible matches  Label matches used for scoring

Show Y-axis

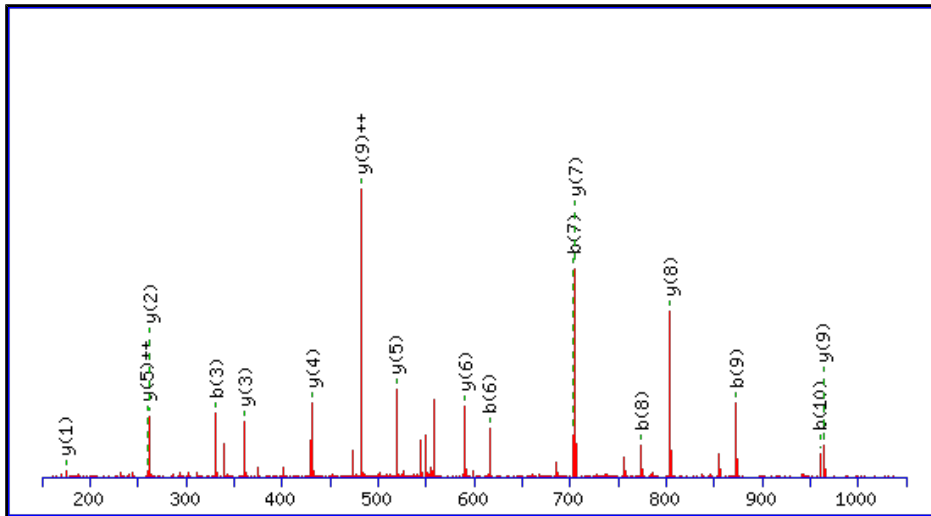

Monoisotopic mass of neutral peptide  $M_r(\text{calc})$ : 1133.5499

Fixed modifications: Carbamidomethyl (C) (apply to specified residues or termini only)

Variable modifications:

N5 : Deamidated (NQ)

Ions Score: 99 Expect: 2.1e-008

Matches : 17/98 fragment ions using 18 most intense peaks ([help](#))

| #  | b        | b <sup>++</sup> | b*       | b <sup>***</sup> | b <sup>0</sup> | b <sup>0++</sup> | Seq. | y         | y <sup>++</sup> | y*        | y <sup>***</sup> | y <sup>0</sup> | y <sup>0++</sup> | #  |
|----|----------|-----------------|----------|------------------|----------------|------------------|------|-----------|-----------------|-----------|------------------|----------------|------------------|----|
| 1  | 58.0287  | 29.5180         |          |                  |                |                  | G    |           |                 |           |                  |                |                  | 11 |
| 2  | 171.1128 | 86.0600         |          |                  |                |                  | L    | 1077.5357 | 539.2715        | 1060.5092 | 530.7582         | 1059.5252      | 530.2662         | 10 |
| 3  | 331.1435 | 166.0754        |          |                  |                |                  | C    | 964.4517  | 482.7295        | 947.4251  | 474.2162         | 946.4411       | 473.7242         | 9  |
| 4  | 430.2119 | 215.6096        |          |                  |                |                  | V    | 804.4210  | 402.7141        | 787.3945  | 394.2009         | 786.4104       | 393.7089         | 8  |
| 5  | 545.2388 | 273.1230        | 528.2123 | 264.6098         |                |                  | N    | 705.3526  | 353.1799        | 688.3260  | 344.6667         | 687.3420       | 344.1747         | 7  |
| 6  | 616.2759 | 308.6416        | 599.2494 | 300.1283         |                |                  | A    | 590.3257  | 295.6665        | 573.2991  | 287.1532         | 572.3151       | 286.6612         | 6  |
| 7  | 703.3080 | 352.1576        | 686.2814 | 343.6443         | 685.2974       | 343.1523         | S    | 519.2885  | 260.1479        | 502.2620  | 251.6346         | 501.2780       | 251.1426         | 5  |
| 8  | 774.3451 | 387.6762        | 757.3185 | 379.1629         | 756.3345       | 378.6709         | A    | 432.2565  | 216.6319        | 415.2300  | 208.1186         | 414.2459       | 207.6266         | 4  |
| 9  | 873.4135 | 437.2104        | 856.3869 | 428.6971         | 855.4029       | 428.2051         | V    | 361.2194  | 181.1133        | 344.1928  | 172.6001         | 343.2088       | 172.1081         | 3  |
| 10 | 960.4455 | 480.7264        | 943.4190 | 472.2131         | 942.4349       | 471.7211         | S    | 262.1510  | 131.5791        | 245.1244  | 123.0659         | 244.1404       | 122.5738         | 2  |
| 11 |          |                 |          |                  |                |                  | R    | 175.1190  | 88.0631         | 158.0924  | 79.5498          |                |                  | 1  |

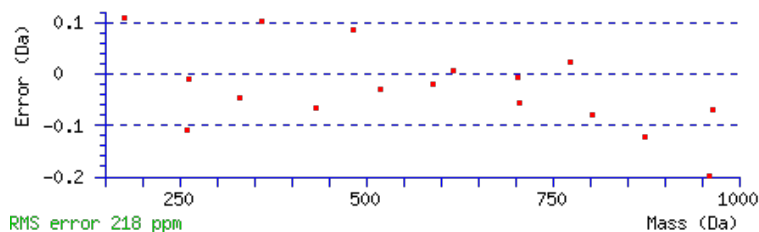



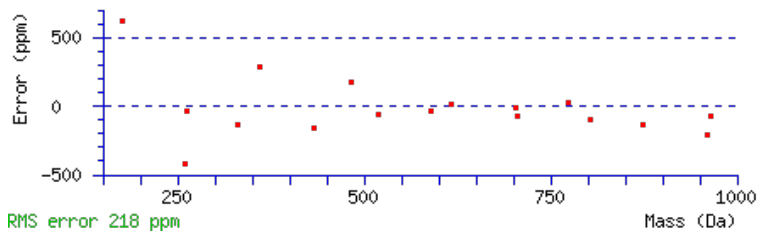

NCBI **BLAST** search of [GLCVNASAVSR](#)

(Parameters: blastp, nr protein database, expect=20000, no filter, PAM30)

Other BLAST [web gateways](#)

**All matches to this query**

| Score | Mr(calc)  | Delta   | Sequence                    |
|-------|-----------|---------|-----------------------------|
| 99.5  | 1133.5499 | 0.0018  | <a href="#">GLCVNASAVSR</a> |
| 24.0  | 1133.5499 | 0.0018  | <a href="#">CATVSAAVAER</a> |
| 14.4  | 1133.5499 | 0.0018  | <a href="#">DVCGSLQSR</a>   |
| 13.7  | 1133.5564 | -0.0047 | <a href="#">LESVDLQSSR</a>  |
| 13.1  | 1132.5481 | 1.0036  | <a href="#">NKIGMASPCR</a>  |
| 12.7  | 1133.5499 | 0.0018  | <a href="#">SSRMGPENKK</a>  |
| 11.5  | 1133.5564 | -0.0047 | <a href="#">IQSVNNTISR</a>  |
| 11.5  | 1133.5499 | 0.0018  | <a href="#">QMAQKVADSR</a>  |
| 10.9  | 1133.5564 | -0.0048 | <a href="#">TLGQSQSTSPK</a> |
| 10.9  | 1133.5564 | -0.0048 | <a href="#">TLGQSQSTSPK</a> |

Mascot: <http://www.matrixscience.com/>

# MATRIX SCIENCE Mascot Search Results

## Peptide View

MS/MS Fragmentation of **AYLLPAPPAPGNASESEEDR**

Found in **B3KWK7** in **con\_Xuniprot\_HUMAN3**, B3KWK7\_HUMAN Insulin-like growth factor binding protein 3, isoform CRA\_b  
 OS=Homo sapiens GN=IGFBP3 PE=2 SV=1

Match to Query 13159: 2083.978468 from(1042.996510,2+) intensity(96197.7266) rtinseconds(1154) scans(2793) index(24448)

Title: 111019\_Est\_MI\_YS\_G\_06Spectrum2415\_scans\_\_2793

Data file C:\mascot\20140703\_Tmgf\_1D\CSV\_UseAnalysis\MasterCSV\All\_Glyco\mgf\ptm\UC18ERIC\_PTM\_35D.mgf

Click mouse within plot area to zoom in by factor of two about that point

Or, to Da

Label all possible matches Label matches used for scoring

Show Y-axis

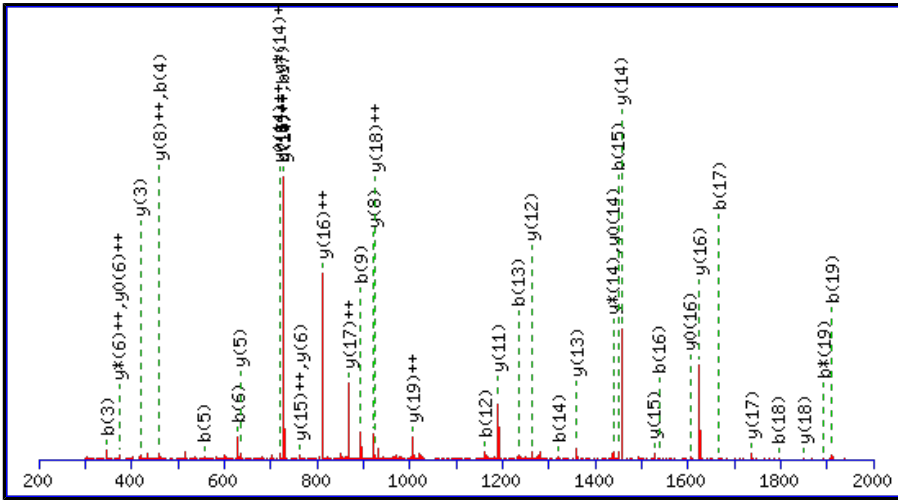

Monoisotopic mass of neutral peptide **Mr(calc): 2083.9698**

Fixed modifications: Carbamidomethyl (C) (apply to specified residues or termini only)

Variable modifications:

N12 : Deamidated (NQ)

Ions Score: 76 Expect: 5.1e-006

Matches : 42/178 fragment ions using 83 most intense peaks ([help](#))

| #  | b         | b <sup>++</sup> | b <sup>*</sup> | b <sup>*++</sup> | b <sup>0</sup> | b <sup>0++</sup> | Seq. | y         | y <sup>++</sup> | y <sup>*</sup> | y <sup>*++</sup> | y <sup>0</sup> | y <sup>0++</sup> | #  |
|----|-----------|-----------------|----------------|------------------|----------------|------------------|------|-----------|-----------------|----------------|------------------|----------------|------------------|----|
| 1  | 72.0444   | 36.5258         |                |                  |                |                  | A    |           |                 |                |                  |                |                  | 20 |
| 2  | 235.1077  | 118.0575        |                |                  |                |                  | Y    | 2013.9400 | 1007.4736       | 1996.9134      | 998.9604         | 1995.9294      | 998.4684         | 19 |
| 3  | 348.1918  | 174.5995        |                |                  |                |                  | L    | 1850.8767 | 925.9420        | 1833.8501      | 917.4287         | 1832.8661      | 916.9367         | 18 |
| 4  | 461.2758  | 231.1416        |                |                  |                |                  | L    | 1737.7926 | 869.3999        | 1720.7661      | 860.8867         | 1719.7820      | 860.3947         | 17 |
| 5  | 558.3286  | 279.6679        |                |                  |                |                  | P    | 1624.7085 | 812.8579        | 1607.6820      | 804.3446         | 1606.6980      | 803.8526         | 16 |
| 6  | 629.3657  | 315.1865        |                |                  |                |                  | A    | 1527.6558 | 764.3315        | 1510.6292      | 755.8182         | 1509.6452      | 755.3262         | 15 |
| 7  | 726.4185  | 363.7129        |                |                  |                |                  | P    | 1456.6187 | 728.8130        | 1439.5921      | 720.2997         | 1438.6081      | 719.8077         | 14 |
| 8  | 823.4713  | 412.2393        |                |                  |                |                  | P    | 1359.5659 | 680.2866        | 1342.5393      | 671.7733         | 1341.5553      | 671.2813         | 13 |
| 9  | 894.5084  | 447.7578        |                |                  |                |                  | A    | 1262.5131 | 631.7602        | 1245.4866      | 623.2469         | 1244.5026      | 622.7549         | 12 |
| 10 | 991.5611  | 496.2842        |                |                  |                |                  | P    | 1191.4760 | 596.2416        | 1174.4495      | 587.7284         | 1173.4655      | 587.2364         | 11 |
| 11 | 1048.5826 | 524.7949        |                |                  |                |                  | G    | 1094.4233 | 547.7153        | 1077.3967      | 539.2020         | 1076.4127      | 538.7100         | 10 |
| 12 | 1163.6095 | 582.3084        | 1146.5830      | 573.7951         |                |                  | N    | 1037.4018 | 519.2045        | 1020.3752      | 510.6913         | 1019.3912      | 510.1992         | 9  |
| 13 | 1234.6467 | 617.8270        | 1217.6201      | 609.3137         |                |                  | A    | 922.3748  | 461.6911        | 905.3483       | 453.1778         | 904.3643       | 452.6858         | 8  |
| 14 | 1321.6787 | 661.3430        | 1304.6521      | 652.8297         | 1303.6681      | 652.3377         | S    | 851.3377  | 426.1725        | 834.3112       | 417.6592         | 833.3272       | 417.1672         | 7  |
| 15 | 1450.7213 | 725.8643        | 1433.6947      | 717.3510         | 1432.7107      | 716.8590         | E    | 764.3057  | 382.6565        | 747.2792       | 374.1432         | 746.2951       | 373.6512         | 6  |
| 16 | 1537.7533 | 769.3803        | 1520.7268      | 760.8670         | 1519.7427      | 760.3750         | S    | 635.2631  | 318.1352        | 618.2366       | 309.6219         | 617.2525       | 309.1299         | 5  |
| 17 | 1666.7959 | 833.9016        | 1649.7693      | 825.3883         | 1648.7853      | 824.8963         | E    | 548.2311  | 274.6192        | 531.2045       | 266.1059         | 530.2205       | 265.6139         | 4  |
| 18 | 1795.8385 | 898.4229        | 1778.8119      | 889.9096         | 1777.8279      | 889.4176         | E    | 419.1885  | 210.0979        | 402.1619       | 201.5846         | 401.1779       | 201.0926         | 3  |
| 19 | 1910.8654 | 955.9364        | 1893.8389      | 947.4231         | 1892.8549      | 946.9311         | D    | 290.1459  | 145.5766        | 273.1193       | 137.0633         | 272.1353       | 136.5713         | 2  |
| 20 |           |                 |                |                  |                |                  | R    | 175.1190  | 88.0631         | 158.0924       | 79.5498          |                |                  | 1  |

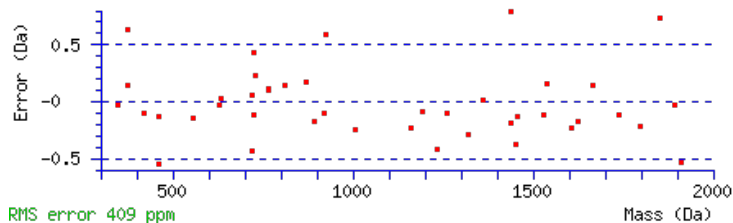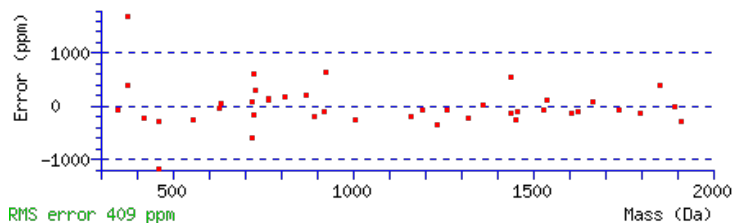

NCBI **BLAST** search of [AYLLPAPPAPGNAESEEDR](#)  
 (Parameters: blastp, nr protein database, expect=20000, no filter, PAM30)  
 Other BLAST [web gateways](#)

**All matches to this query**

| Score | Mr(calc)  | Delta   | Sequence                            |
|-------|-----------|---------|-------------------------------------|
| 76.0  | 2083.9698 | 0.0087  | <a href="#">AYLLPAPPAPGNAESEEDR</a> |
| 12.7  | 2083.9857 | -0.0073 | <a href="#">AIYNVSQCPCGHQATPRQR</a> |
| 11.9  | 2083.9857 | -0.0073 | <a href="#">AIYNVSQCPCGHQATPRQR</a> |
| 9.7   | 2083.9857 | -0.0073 | <a href="#">AIYNVSQCPCGHQATPRQR</a> |
| 8.3   | 2081.9761 | 2.0023  | <a href="#">ANCIMQEDESYLELQVLR</a>  |
| 4.8   | 2082.9779 | 1.0005  | <a href="#">SGESSCPLEQSVPEPALAK</a> |
| 3.8   | 2082.9793 | 0.9992  | <a href="#">TDMNEYHQVHVVINLDR</a>   |
| 3.6   | 2083.9853 | -0.0068 | <a href="#">EIRINMSCAVFITM NPR</a>  |
| 3.1   | 2082.9680 | 1.0105  | <a href="#">QERLYEANERMWLEAK</a>    |
| 3.0   | 2081.9687 | 2.0097  | <a href="#">TNELFQTMQRAQELAQR</a>   |

Mascot: <http://www.matrixscience.com/>

# MASCOT SCIENCE Mascot Search Results

## Peptide View

MS/MS Fragmentation of **YKVDYEQSTDTQNFSSSKR**

Found in **B3KWK7** in **con\_Xuniprot\_HUMAN3**, B3KWK7\_HUMAN Insulin-like growth factor binding protein 3, isoform CRA\_b OS=Homo sapiens GN=IGFBP3 PE=2 SV=1

Match to Query 21524: 2499.112812 from(834.044880,3+) intensity(8821.7275) rtinseconds(579) scans(1178) index(1874)

Title: 111019\_Est\_ISCardio\_NMI\_YP\_G\_4Spectrum967\_scans\_\_1178

Data file C:\mascot\20140703\_Tmgf\_1D\CSV\_UseAnalysis\MasterCSV\All\_Glyco\mgf\ptm\UC18ERLIC\_PTM\_35D.mgf

Click mouse within plot area to zoom in by factor of two about that point

Or, to Da

Label all possible matches Label matches used for scoring

Show Y-axis

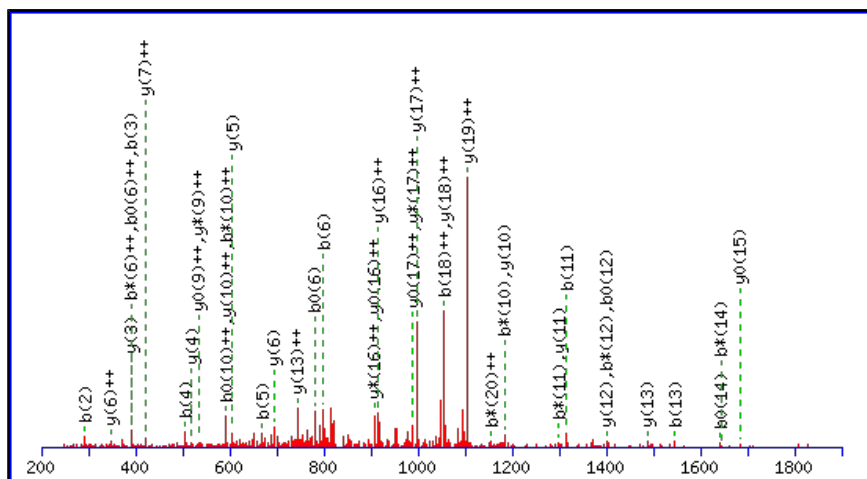

Monoisotopic mass of neutral peptide Mr(calc): 2499.1037

Fixed modifications: Carbamidomethyl (C) (apply to specified residues or termini only)

Variable modifications:

N14 : Deamidated (NQ)

Ions Score: 62 Expect: 6.9e-005

Matches : 43/228 fragment ions using 47 most intense peaks ([help](#))

| #  | b                | b <sup>++</sup>  | b <sup>*</sup>   | b <sup>*++</sup> | b <sup>0</sup>   | b <sup>0++</sup> | Seq. | y                | y <sup>++</sup>  | y <sup>*</sup> | y <sup>*++</sup> | y <sup>0</sup>   | y <sup>0++</sup> | #  |
|----|------------------|------------------|------------------|------------------|------------------|------------------|------|------------------|------------------|----------------|------------------|------------------|------------------|----|
| 1  | 164.0706         | 82.5389          |                  |                  |                  |                  | Y    |                  |                  |                |                  |                  |                  | 21 |
| 2  | <b>292.1656</b>  | 146.5864         | 275.1390         | 138.0731         |                  |                  | K    | 2337.0477        | 1169.0275        | 2320.0212      | 1160.5142        | 2319.0371        | 1160.0222        | 20 |
| 3  | <b>391.2340</b>  | 196.1206         | 374.2074         | 187.6074         |                  |                  | V    | 2208.9527        | <b>1104.9800</b> | 2191.9262      | 1096.4667        | 2190.9422        | 1095.9747        | 19 |
| 4  | <b>506.2609</b>  | 253.6341         | 489.2344         | 245.1208         | 488.2504         | 244.6288         | D    | 2109.8843        | <b>1055.4458</b> | 2092.8578      | 1046.9325        | 2091.8738        | 1046.4405        | 18 |
| 5  | <b>669.3243</b>  | 335.1658         | 652.2977         | 326.6525         | 651.3137         | 326.1605         | Y    | 1994.8574        | <b>997.9323</b>  | 1977.8308      | <b>989.4191</b>  | 1976.8468        | <b>988.9270</b>  | 17 |
| 6  | <b>798.3668</b>  | 399.6871         | 781.3403         | <b>391.1738</b>  | <b>780.3563</b>  | <b>390.6818</b>  | E    | 1831.7941        | <b>916.4007</b>  | 1814.7675      | <b>907.8874</b>  | 1813.7835        | <b>907.3954</b>  | 16 |
| 7  | 885.3989         | 443.2031         | 868.3723         | 434.6898         | 867.3883         | 434.1978         | S    | 1702.7515        | 851.8794         | 1685.7249      | 843.3661         | <b>1684.7409</b> | 842.8741         | 15 |
| 8  | 1013.4575        | 507.2324         | 996.4309         | 498.7191         | 995.4469         | 498.2271         | Q    | 1615.7194        | 808.3634         | 1598.6929      | 799.8501         | 1597.7089        | 799.3581         | 14 |
| 9  | 1100.4895        | 550.7484         | 1083.4629        | 542.2351         | 1082.4789        | 541.7431         | S    | <b>1487.6609</b> | <b>744.3341</b>  | 1470.6343      | 735.8208         | 1469.6503        | 735.3288         | 13 |
| 10 | 1201.5372        | 601.2722         | <b>1184.5106</b> | <b>592.7589</b>  | 1183.5266        | <b>592.2669</b>  | T    | <b>1400.6288</b> | 700.8181         | 1383.6023      | 692.3048         | 1382.6183        | 691.8128         | 12 |
| 11 | <b>1316.5641</b> | 658.7857         | <b>1299.5376</b> | 650.2724         | 1298.5535        | 649.7804         | D    | <b>1299.5811</b> | 650.2942         | 1282.5546      | 641.7809         | 1281.5706        | 641.2889         | 11 |
| 12 | 1417.6118        | 709.3095         | <b>1400.5852</b> | 700.7963         | <b>1399.6012</b> | 700.3042         | T    | <b>1184.5542</b> | <b>592.7807</b>  | 1167.5277      | 584.2675         | 1166.5436        | 583.7755         | 10 |
| 13 | <b>1545.6704</b> | 773.3388         | 1528.6438        | 764.8255         | 1527.6598        | 764.3335         | Q    | 1083.5065        | 542.2569         | 1066.4800      | <b>533.7436</b>  | 1065.4960        | <b>533.2516</b>  | 9  |
| 14 | 1660.6973        | 830.8523         | <b>1643.6708</b> | 822.3390         | <b>1642.6867</b> | 821.8470         | N    | 955.4479         | 478.2276         | 938.4214       | 469.7143         | 937.4374         | 469.2223         | 8  |
| 15 | 1807.7657        | 904.3865         | 1790.7392        | 895.8732         | 1789.7552        | 895.3812         | F    | 840.4210         | <b>420.7141</b>  | 823.3945       | 412.2009         | 822.4104         | 411.7089         | 7  |
| 16 | 1894.7977        | 947.9025         | 1877.7712        | 939.3892         | 1876.7872        | 938.8972         | S    | <b>693.3526</b>  | <b>347.1799</b>  | 676.3260       | 338.6667         | 675.3420         | 338.1747         | 6  |
| 17 | 1981.8298        | 991.4185         | 1964.8032        | 982.9053         | 1963.8192        | 982.4132         | S    | <b>606.3206</b>  | 303.6639         | 589.2940       | 295.1506         | 588.3100         | 294.6586         | 5  |
| 18 | 2110.8724        | <b>1055.9398</b> | 2093.8458        | 1047.4265        | 2092.8618        | 1046.9345        | E    | <b>519.2885</b>  | 260.1479         | 502.2620       | 251.6346         | 501.2780         | 251.1426         | 4  |
| 19 | 2197.9044        | 1099.4558        | 2180.8778        | 1090.9426        | 2179.8938        | 1090.4506        | S    | <b>390.2459</b>  | 195.6266         | 373.2194       | 187.1133         | 372.2354         | 186.6213         | 3  |
| 20 | 2325.9994        | 1163.5033        | 2308.9728        | <b>1154.9900</b> | 2307.9888        | 1154.4980        | K    | 303.2139         | 152.1106         | 286.1874       | 143.5973         |                  |                  | 2  |
| 21 |                  |                  |                  |                  |                  |                  | R    | 175.1190         | 88.0631          | 158.0924       | 79.5498          |                  |                  | 1  |

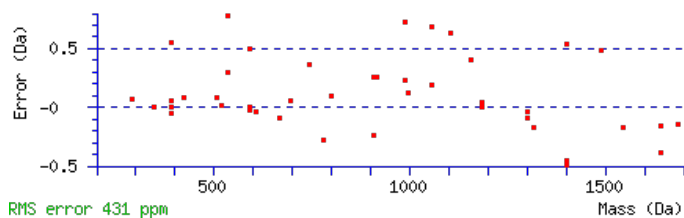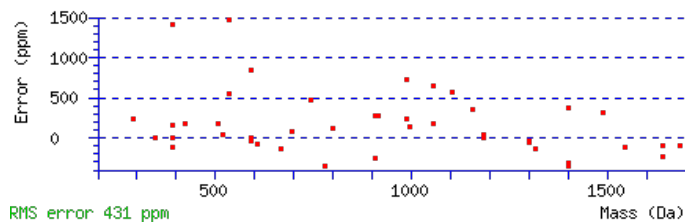

NCBI BLAST search of [YKVDYESQSTDTQNFSSSESKR](#)

(Parameters: blastp, nr protein database, expect=20000, no filter, PAM30)

Other BLAST [web gateways](#)

**All matches to this query**

| Score | Mr(calc)  | Delta   | Sequence                               | Site Analysis         |
|-------|-----------|---------|----------------------------------------|-----------------------|
| 62.5  | 2499.1037 | 0.0091  | <a href="#">YKVDYESQSTDTQNFSSSESKR</a> | Deamidated N14 66.84% |
| 59.3  | 2499.1037 | 0.0091  | <a href="#">YKVDYESQSTDTQNFSSSESKR</a> | Deamidated Q13 32.14% |
| 44.3  | 2499.1037 | 0.0091  | <a href="#">YKVDYESQSTDTQNFSSSESKR</a> | Deamidated Q8 1.02%   |
| 40.2  | 2498.1197 | 0.9931  | <a href="#">YKVDYESQSTDTQNFSSSESKR</a> |                       |
| 10.4  | 2497.1026 | 2.0102  | <a href="#">EGCNLHREETSSSQYSIKNEK</a>  |                       |
| 7.6   | 2497.1026 | 2.0102  | <a href="#">EGCNLHREETSSSQYSIKNEK</a>  |                       |
| 7.5   | 2499.1086 | 0.0042  | <a href="#">FPTQPFASHNMGEEIVMYESK</a>  |                       |
| 7.1   | 2499.1078 | 0.0050  | <a href="#">ESSTFTKSSGIYLTWYDDEDR</a>  |                       |
| 6.8   | 2499.1145 | -0.0016 | <a href="#">EYDEMLQENEQNVALVKCIR</a>   |                       |
| 6.8   | 2499.1145 | -0.0016 | <a href="#">EYDEMLQENEQNVALVKCIR</a>   |                       |

Mascot: <http://www.matrixscience.com/>



# MATRIX SCIENCE Mascot Search Results

## Peptide View

MS/MS Fragmentation of **SHLIAQVAKNPVGLIGAENATGETDPSHSK**

Found in **A6NHF2** in **con\_Xuniprot\_HUMAN3**, A6NHF2\_HUMAN Biotinidase OS=Homo sapiens GN=BTD PE=2 SV=3

Match to Query 27336: 3154.639302 from(1052.553710,3+) intensity(61745.7422) rtinseconds(1474) scans(3631) index(9451)

Title: 111019\_Est\_ISCardio\_NMI\_YS\_G\_5Spectrum3098\_scans\_\_3631

Data file C:\mascot\20140703\_Tmgf\_1D\CSV\_UseAnalysis\MasterCSV\All\_Glyco\mgf\ptm\UC18ERLIC\_PTM\_35D.mgf

Click mouse within plot area to zoom in by factor of two about that point

Or, to Da

Label all possible matches Label matches used for scoring

Show Y-axis

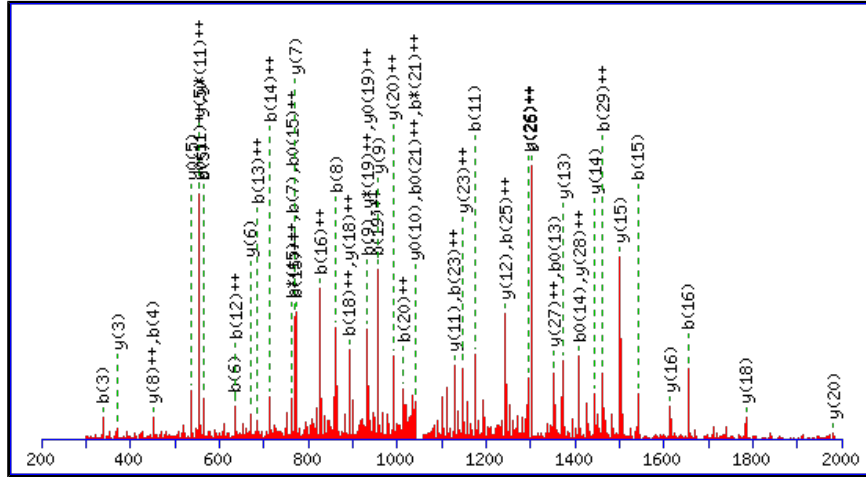

Monoisotopic mass of neutral peptide Mr(calc): 3154.6258

Fixed modifications: Carbamidomethyl (C) (apply to specified residues or termini only)

Variable modifications:

N20 : Deamidated (NQ)

Ions Score: 92 Expect: 1.1e-007

Matches : 54/346 fragment ions using 68 most intense peaks ([help](#))

| #  | b                | b <sup>++</sup>  | b <sup>*</sup> | b <sup>*++</sup> | b <sup>0</sup>   | b <sup>0++</sup> | Seq. | y                | y <sup>++</sup>  | y <sup>*</sup> | y <sup>*++</sup> | y <sup>0</sup>   | y <sup>0++</sup> | #  |
|----|------------------|------------------|----------------|------------------|------------------|------------------|------|------------------|------------------|----------------|------------------|------------------|------------------|----|
| 1  | 88.0393          | 44.5233          |                |                  | 70.0287          | 35.5180          | S    |                  |                  |                |                  |                  |                  | 31 |
| 2  | 225.0982         | 113.0527         |                |                  | 207.0877         | 104.0475         | H    | 3068.6011        | 1534.8042        | 3051.5746      | 1526.2909        | 3050.5905        | 1525.7989        | 30 |
| 3  | <b>338.1823</b>  | 169.5948         |                |                  | 320.1717         | 160.5895         | L    | 2931.5422        | 1466.2747        | 2914.5156      | 1457.7615        | 2913.5316        | 1457.2695        | 29 |
| 4  | <b>451.2663</b>  | 226.1368         |                |                  | 433.2558         | 217.1315         | I    | 2818.4581        | <b>1409.7327</b> | 2801.4316      | 1401.2194        | 2800.4476        | 1400.7274        | 28 |
| 5  | <b>564.3504</b>  | 282.6788         |                |                  | 546.3398         | 273.6736         | I    | 2705.3741        | <b>1353.1907</b> | 2688.3475      | 1344.6774        | 2687.3635        | 1344.1854        | 27 |
| 6  | <b>635.3875</b>  | 318.1974         |                |                  | 617.3770         | 309.1921         | A    | 2592.2900        | <b>1296.6486</b> | 2575.2635      | 1288.1354        | 2574.2794        | 1287.6434        | 26 |
| 7  | <b>763.4461</b>  | 382.2267         | 746.4196       | 373.7134         | 745.4355         | 373.2214         | Q    | 2521.2529        | 1261.1301        | 2504.2263      | 1252.6168        | 2503.2423        | 1252.1248        | 25 |
| 8  | <b>862.5145</b>  | 431.7609         | 845.4880       | 423.2476         | 844.5039         | 422.7556         | V    | 2393.1943        | 1197.1008        | 2376.1678      | 1188.5875        | 2375.1837        | 1188.0955        | 24 |
| 9  | <b>933.5516</b>  | 467.2795         | 916.5251       | 458.7662         | 915.5411         | 458.2742         | A    | 2294.1259        | <b>1147.5666</b> | 2277.0993      | 1139.0533        | 2276.1153        | 1138.5613        | 23 |
| 10 | 1061.6466        | 531.3269         | 1044.6200      | 522.8137         | 1043.6360        | 522.3217         | K    | 2223.0888        | 1112.0480        | 2206.0622      | 1103.5348        | 2205.0782        | 1103.0427        | 22 |
| 11 | <b>1175.6895</b> | 588.3484         | 1158.6630      | 579.8351         | 1157.6790        | 579.3431         | N    | 2094.9938        | 1048.0005        | 2077.9673      | 1039.4873        | 2076.9833        | 1038.9953        | 21 |
| 12 | 1272.7423        | <b>636.8748</b>  | 1255.7157      | 628.3615         | 1254.7317        | 627.8695         | P    | <b>1980.9509</b> | <b>990.9791</b>  | 1963.9243      | 982.4658         | 1962.9403        | 981.9738         | 20 |
| 13 | 1371.8107        | <b>686.4090</b>  | 1354.7841      | 677.8957         | <b>1353.8001</b> | 677.4037         | V    | 1883.8981        | 942.4527         | 1866.8716      | <b>933.9394</b>  | 1865.8876        | <b>933.4474</b>  | 19 |
| 14 | 1428.8322        | <b>714.9197</b>  | 1411.8056      | 706.4064         | <b>1410.8216</b> | 705.9144         | G    | <b>1784.8297</b> | <b>892.9185</b>  | 1767.8032      | 884.4052         | 1766.8191        | 883.9132         | 18 |
| 15 | <b>1541.9162</b> | <b>771.4617</b>  | 1524.8897      | <b>762.9485</b>  | 1523.9057        | <b>762.4565</b>  | L    | 1727.8082        | 864.4078         | 1710.7817      | 855.8945         | 1709.7977        | 855.4025         | 17 |
| 16 | <b>1655.0003</b> | <b>828.0038</b>  | 1637.9737      | 819.4905         | 1636.9897        | 818.9985         | I    | <b>1614.7242</b> | 807.8657         | 1597.6976      | 799.3525         | 1596.7136        | 798.8604         | 16 |
| 17 | 1712.0218        | 856.5145         | 1694.9952      | 848.0012         | 1694.0112        | 847.5092         | G    | <b>1501.6401</b> | 751.3237         | 1484.6136      | 742.8104         | 1483.6296        | 742.3184         | 15 |
| 18 | 1783.0589        | <b>892.0331</b>  | 1766.0323      | 883.5198         | 1765.0483        | 883.0278         | A    | <b>1444.6187</b> | 722.8130         | 1427.5921      | 714.2997         | 1426.6081        | 713.8077         | 14 |
| 19 | 1912.1015        | <b>956.5544</b>  | 1895.0749      | 948.0411         | 1894.0909        | 947.5491         | E    | <b>1373.5815</b> | 687.2944         | 1356.5550      | 678.7811         | 1355.5710        | 678.2891         | 13 |
| 20 | 2027.1284        | <b>1014.0678</b> | 2010.1019      | 1005.5546        | 2009.1178        | 1005.0626        | N    | <b>1244.5390</b> | 622.7731         | 1227.5124      | 614.2598         | 1226.5284        | 613.7678         | 12 |
| 21 | 2098.1655        | 1049.5864        | 2081.1390      | <b>1041.0731</b> | 2080.1550        | <b>1040.5811</b> | A    | <b>1129.5120</b> | 565.2596         | 1112.4855      | <b>556.7464</b>  | 1111.5014        | <b>556.2544</b>  | 11 |
| 22 | 2199.2132        | 1100.1102        | 2182.1866      | 1091.5970        | 2181.2026        | 1091.1050        | T    | 1058.4749        | 529.7411         | 1041.4483      | 521.2278         | <b>1040.4643</b> | 520.7358         | 10 |
| 23 | 2256.2347        | <b>1128.6210</b> | 2239.2081      | 1120.1077        | 2238.2241        | 1119.6157        | G    | <b>957.4272</b>  | 479.2172         | 940.4007       | 470.7040         | 939.4166         | 470.2120         | 9  |

|    |           |           |           |           |           |           |   |          |          |          |          |          |          |   |
|----|-----------|-----------|-----------|-----------|-----------|-----------|---|----------|----------|----------|----------|----------|----------|---|
| 24 | 2385.2773 | 1193.1423 | 2368.2507 | 1184.6290 | 2367.2667 | 1184.1370 | E | 900.4058 | 450.7065 | 883.3792 | 442.1932 | 882.3952 | 441.7012 | 8 |
| 25 | 2486.3249 | 1243.6661 | 2469.2984 | 1235.1528 | 2468.3144 | 1234.6608 | T | 771.3632 | 386.1852 | 754.3366 | 377.6719 | 753.3526 | 377.1799 | 7 |
| 26 | 2601.3519 | 1301.1796 | 2584.3253 | 1292.6663 | 2583.3413 | 1292.1743 | D | 670.3155 | 335.6614 | 653.2889 | 327.1481 | 652.3049 | 326.6561 | 6 |
| 27 | 2698.4046 | 1349.7060 | 2681.3781 | 1341.1927 | 2680.3941 | 1340.7007 | P | 555.2885 | 278.1479 | 538.2620 | 269.6346 | 537.2780 | 269.1426 | 5 |
| 28 | 2785.4367 | 1393.2220 | 2768.4101 | 1384.7087 | 2767.4261 | 1384.2167 | S | 458.2358 | 229.6215 | 441.2092 | 221.1082 | 440.2252 | 220.6162 | 4 |
| 29 | 2922.4956 | 1461.7514 | 2905.4690 | 1453.2382 | 2904.4850 | 1452.7461 | H | 371.2037 | 186.1055 | 354.1772 | 177.5922 | 353.1932 | 177.1002 | 3 |
| 30 | 3009.5276 | 1505.2674 | 2992.5011 | 1496.7542 | 2991.5170 | 1496.2622 | S | 234.1448 | 117.5761 | 217.1183 | 109.0628 | 216.1343 | 108.5708 | 2 |
| 31 |           |           |           |           |           |           | K | 147.1128 | 74.0600  | 130.0863 | 65.5468  |          |          | 1 |

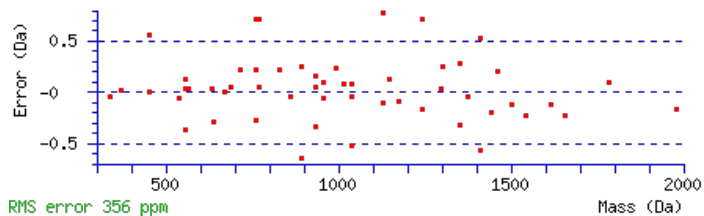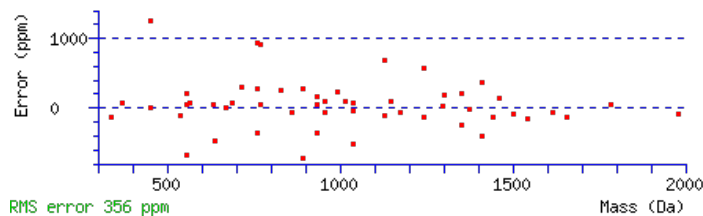

NCBI BLAST search of [SHLIIAQVAKNPVGLIGAENATGETDPSHSK](#)  
 (Parameters: blastp, nr protein database, expect=20000, no filter, PAM30)  
 Other BLAST [web gateways](#)

All matches to this query

| Score | Mr(calc)  | Delta  | Sequence                                          | Site Analysis         |
|-------|-----------|--------|---------------------------------------------------|-----------------------|
| 91.8  | 3154.6258 | 0.0135 | <a href="#">SHLIIAQVAKNPVGLIGAENATGETDPSHSK</a>   | Deamidated N20 74.67% |
| 85.1  | 3154.6258 | 0.0135 | <a href="#">SHLIIAQVAKNPVGLIGAENATGETDPSHSK</a>   | Deamidated Q7 16.04%  |
| 82.7  | 3154.6258 | 0.0135 | <a href="#">SHLIIAQVAKNPVGLIGAENATGETDPSHSK</a>   | Deamidated N11 9.29%  |
| 66.1  | 3153.6418 | 0.9975 | <a href="#">SHLIIAQVAKNPVGLIGAENATGETDPSHSK</a>   |                       |
| 10.3  | 3153.6346 | 1.0047 | <a href="#">QLLSAAYLQPSAQGALPLHAEPPPSPLTR</a>     |                       |
| 9.7   | 3153.6346 | 1.0047 | <a href="#">QLLSAAYLQPSAQGALPLHAEPPPSPLTR</a>     |                       |
| 8.7   | 3153.6346 | 1.0047 | <a href="#">QLLSAAYLQPSAQGALPLHAEPPPSPLTR</a>     |                       |
| 8.3   | 3152.6375 | 2.0018 | <a href="#">MISRHLPSVSSLPEHPQLHPQQMIISR</a>       |                       |
| 8.3   | 3152.6375 | 2.0018 | <a href="#">MISRHLPSVSSLPEHPQLHPQQMIISR</a>       |                       |
| 6.4   | 3153.6227 | 1.0166 | <a href="#">QQEIAAAAATGGSVLNVAALLASGTQVTPQIAM</a> |                       |

Mascot: <http://www.matrixscience.com/>

# MASCOT SCIENCE Mascot Search Results

## Peptide View

MS/MS Fragmentation of **NPVGLIGAENATGETDPSHSK**

Found in **A6NHF2** in **con\_Xuniprot\_HUMAN3**, A6NHF2\_HUMAN Biotinidase OS=Homo sapiens GN=BTD PE=2 SV=3

Match to Query 13540: 2093.992002 from(699.004610,3+) intensity(104071.2266) rtinseconds(789) scans(1877) index(4265)

Title: 111019\_Est\_ISCardio\_NMI\_YP\_G\_7Spectrum1634\_scans\_\_1877

Data file C:\\mascot\\20140703\_Tmgf\_1D\\CSV\_UseAnalysis\\MasterCSV\\All\_Glyco\\mgf\\ptm\\UC18ERLIC\_PTM\_35D.mgf

Click mouse within plot area to zoom in by factor of two about that point

Or, to Da

Label all possible matches Label matches used for scoring

Show Y-axis

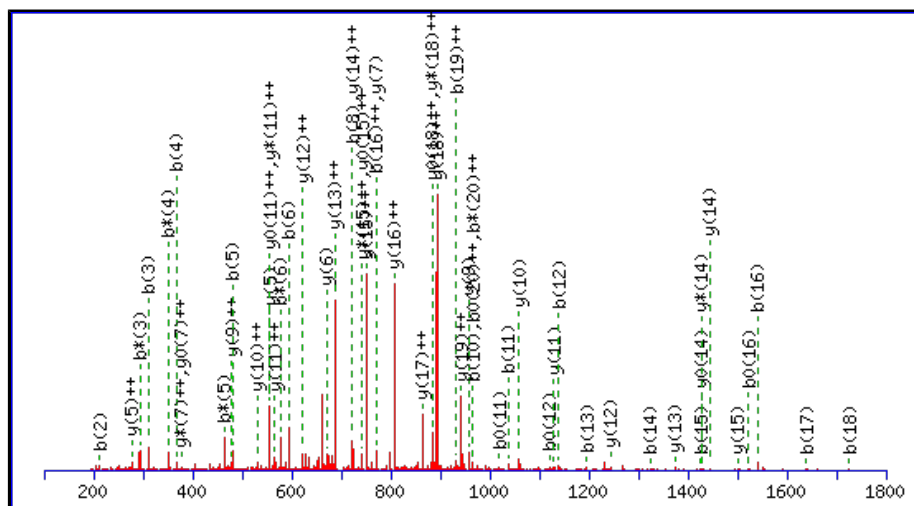

Monoisotopic mass of neutral peptide Mr(calc): 2093.9865

Fixed modifications: Carbamidomethyl (C) (apply to specified residues or termini only)

Variable modifications:

N10 : Deamidated (NQ)

Ions Score: 85 Expect: 6.6e-007

Matches : 58/222 fragment ions using 101 most intense peaks (help)

| #  | b                | b <sup>++</sup> | b <sup>*</sup>  | b <sup>*++</sup> | b <sup>0</sup>   | b <sup>0++</sup> | Seq. | y                | y <sup>++</sup> | y <sup>*</sup>   | y <sup>*++</sup> | y <sup>0</sup>   | y <sup>0++</sup> | #  |
|----|------------------|-----------------|-----------------|------------------|------------------|------------------|------|------------------|-----------------|------------------|------------------|------------------|------------------|----|
| 1  | 115.0502         | 58.0287         | 98.0237         | 49.5155          |                  |                  | N    |                  |                 |                  |                  |                  |                  | 21 |
| 2  | <b>212.1030</b>  | 106.5551        | 195.0764        | 98.0418          |                  |                  | P    | 1980.9509        | 990.9791        | 1963.9243        | 982.4658         | 1962.9403        | 981.9738         | 20 |
| 3  | <b>311.1714</b>  | 156.0893        | <b>294.1448</b> | 147.5761         |                  |                  | V    | 1883.8981        | <b>942.4527</b> | 1866.8716        | 933.9394         | 1865.8876        | 933.4474         | 19 |
| 4  | <b>368.1928</b>  | 184.6001        | <b>351.1663</b> | 176.0868         |                  |                  | G    | 1784.8297        | <b>892.9185</b> | 1767.8032        | <b>884.4052</b>  | 1766.8191        | <b>883.9132</b>  | 18 |
| 5  | <b>481.2769</b>  | 241.1421        | <b>464.2504</b> | 232.6288         |                  |                  | L    | 1727.8083        | <b>864.4078</b> | 1710.7817        | 855.8945         | 1709.7977        | 855.4025         | 17 |
| 6  | <b>594.3610</b>  | 297.6841        | <b>577.3344</b> | 289.1709         |                  |                  | I    | 1614.7242        | <b>807.8657</b> | 1597.6976        | 799.3525         | 1596.7136        | 798.8604         | 16 |
| 7  | 651.3824         | 326.1949        | 634.3559        | 317.6816         |                  |                  | G    | <b>1501.6401</b> | <b>751.3237</b> | 1484.6136        | <b>742.8104</b>  | 1483.6296        | <b>742.3184</b>  | 15 |
| 8  | <b>722.4196</b>  | 361.7134        | 705.3930        | 353.2001         |                  |                  | A    | <b>1444.6187</b> | <b>722.8130</b> | <b>1427.5921</b> | 714.2997         | <b>1426.6081</b> | 713.8077         | 14 |
| 9  | 851.4621         | 426.2347        | 834.4356        | 417.7214         | 833.4516         | 417.2294         | E    | <b>1373.5815</b> | <b>687.2944</b> | 1356.5550        | 678.7811         | 1355.5710        | 678.2891         | 13 |
| 10 | <b>966.4891</b>  | 483.7482        | 949.4625        | 475.2349         | 948.4785         | 474.7429         | N    | <b>1244.5390</b> | <b>622.7731</b> | 1227.5124        | 614.2598         | 1226.5284        | 613.7678         | 12 |
| 11 | <b>1037.5262</b> | 519.2667        | 1020.4997       | 510.7535         | <b>1019.5156</b> | 510.2615         | A    | <b>1129.5120</b> | <b>565.2596</b> | 1112.4855        | <b>556.7464</b>  | 1111.5014        | <b>556.2544</b>  | 11 |
| 12 | <b>1138.5739</b> | 569.7906        | 1121.5473       | 561.2773         | <b>1120.5633</b> | 560.7853         | T    | <b>1058.4749</b> | <b>529.7411</b> | 1041.4483        | 521.2278         | 1040.4643        | 520.7358         | 10 |
| 13 | <b>1195.5953</b> | 598.3013        | 1178.5688       | 589.7880         | 1177.5848        | 589.2960         | G    | <b>957.4272</b>  | <b>479.2172</b> | 940.4007         | 470.7040         | 939.4167         | 470.2120         | 9  |
| 14 | <b>1324.6379</b> | 662.8226        | 1307.6114       | 654.3093         | 1306.6274        | 653.8173         | E    | 900.4058         | 450.7065        | 883.3792         | 442.1932         | 882.3952         | 441.7012         | 8  |
| 15 | <b>1425.6856</b> | 713.3464        | 1408.6591       | 704.8332         | 1407.6751        | 704.3412         | T    | <b>771.3632</b>  | 386.1852        | 754.3366         | <b>377.6719</b>  | 753.3526         | <b>377.1799</b>  | 7  |
| 16 | <b>1540.7126</b> | <b>770.8599</b> | 1523.6860       | 762.3466         | <b>1522.7020</b> | 761.8546         | D    | <b>670.3155</b>  | 335.6614        | 653.2889         | 327.1481         | 652.3049         | 326.6561         | 6  |
| 17 | <b>1637.7653</b> | 819.3863        | 1620.7388       | 810.8730         | 1619.7548        | 810.3810         | P    | <b>555.2885</b>  | <b>278.1479</b> | 538.2620         | 269.6346         | 537.2780         | 269.1426         | 5  |
| 18 | <b>1724.7974</b> | 862.9023        | 1707.7708       | 854.3890         | 1706.7868        | 853.8970         | S    | 458.2358         | 229.6215        | 441.2092         | 221.1082         | 440.2252         | 220.6162         | 4  |
| 19 | 1861.8563        | <b>931.4318</b> | 1844.8297       | 922.9185         | 1843.8457        | 922.4265         | H    | 371.2037         | 186.1055        | 354.1772         | 177.5922         | 353.1932         | 177.1002         | 3  |
| 20 | 1948.8883        | 974.9478        | 1931.8617       | <b>966.4345</b>  | 1930.8777        | <b>965.9425</b>  | S    | 234.1448         | 117.5761        | 217.1183         | 109.0628         | 216.1343         | 108.5708         | 2  |

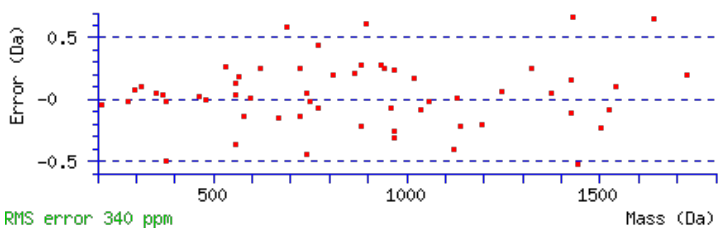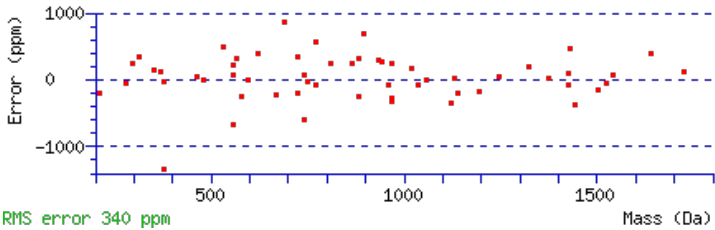

NCBI **BLAST** search of [NPVGLIGAENATGETDPSHSK](#)  
 (Parameters: blastp, nr protein database, expect=20000, no filter, PAM30)  
 Other BLAST [web gateways](#)

**All matches to this query**

| Score | Mr(calc)  | Delta  | Sequence                              | Site Analysis         |
|-------|-----------|--------|---------------------------------------|-----------------------|
| 85.5  | 2093.9865 | 0.0055 | <a href="#">NPVGLIGAENATGETDPSHSK</a> | Deamidated N10 98.33% |
| 67.8  | 2093.9865 | 0.0055 | <a href="#">NPVGLIGAENATGETDPSHSK</a> | Deamidated N1 1.67%   |
| 6.0   | 2092.9921 | 0.9999 | <a href="#">KGYAEALVEPTMMKTGHSQ</a>   |                       |
| 6.0   | 2092.9921 | 0.9999 | <a href="#">KGYAEALVEPTMMKTGHSQ</a>   |                       |
| 5.9   | 2091.9928 | 1.9992 | <a href="#">CMQVGGNANALGAKKGLGAQK</a> |                       |
| 2.2   | 2091.9904 | 2.0016 | <a href="#">FPGPQVSADMRVVTMPGMR</a>   |                       |
| 1.4   | 2092.9834 | 1.0086 | <a href="#">KLTEGEQDEASNAAMLLEK</a>   |                       |
| 1.2   | 2092.9926 | 0.9994 | <a href="#">HGNFSTIAEEAESRKDFR</a>    |                       |
| 1.1   | 2091.9904 | 2.0016 | <a href="#">FPGPQVSADMRVVTMPGMR</a>   |                       |
| 1.1   | 2092.9834 | 1.0086 | <a href="#">KLTEGEQDEASNAAMLLEK</a>   |                       |

Mascot: <http://www.matrixscience.com/>

# MATRIX SCIENCE Mascot Search Results

## Peptide View

MS/MS Fragmentation of **DVQIIVFPEDGIHGFNFR**

Found in **A6NHF2** in **con\_Xuniprot\_HUMAN3**, A6NHF2\_HUMAN Biotinidase OS=Homo sapiens GN=BTD PE=2 SV=3

Match to Query 14867: 2204.098448 from(1103.056500,2+) intensity(46144.2344) rtinseconds(2305) scans(6088) index(16183)

Title: 111019\_Est\_ML\_YP\_G\_05Spectrum5202\_scans\_\_6088

Data file C:\mascot\20140703\_Tmgf\_1D\CSV\_UseAnalysis\MasterCSV\All\_Glyco\mgf\ptm\UC18ERLIC\_PTM\_35D.mgf

Click mouse within plot area to zoom in by factor of two about that point

Or, to Da

Label all possible matches Label matches used for scoring

Show Y-axis

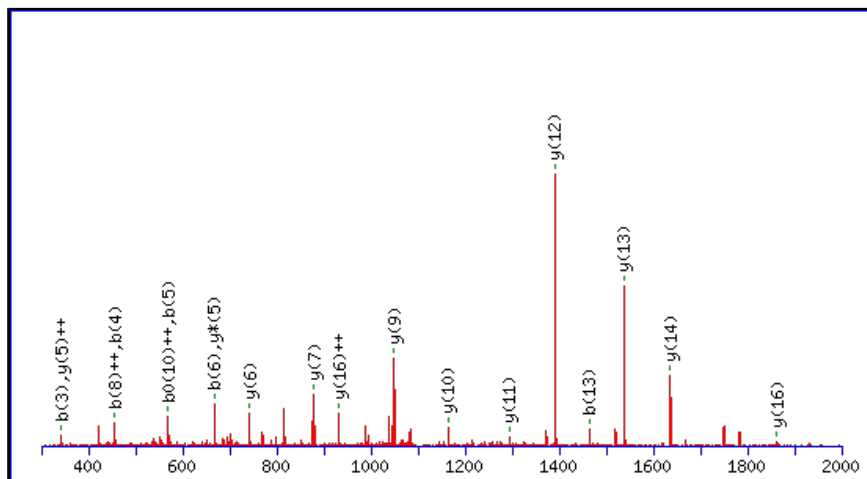

Monoisotopic mass of neutral peptide Mr(calc): 2204.0902

Fixed modifications: Carbamidomethyl (C) (apply to specified residues or termini only)

Variable modifications:

N16 : Deamidated (NQ)

Ions Score: 76 Expect: 7.2e-006

Matches : 19/210 fragment ions using 17 most intense peaks ([help](#))

| #  | b                | b <sup>++</sup> | b <sup>*</sup> | b <sup>*++</sup> | b <sup>0</sup> | b <sup>0++</sup> | Seq. | y                | y <sup>++</sup> | y <sup>*</sup>  | y <sup>*++</sup> | y <sup>0</sup> | y <sup>0++</sup> | #  |
|----|------------------|-----------------|----------------|------------------|----------------|------------------|------|------------------|-----------------|-----------------|------------------|----------------|------------------|----|
| 1  | 116.0342         | 58.5207         |                |                  | 98.0237        | 49.5155          | D    |                  |                 |                 |                  |                |                  | 19 |
| 2  | 215.1026         | 108.0550        |                |                  | 197.0921       | 99.0497          | V    | 2090.0706        | 1045.5389       | 2073.0440       | 1037.0256        | 2072.0600      | 1036.5336        | 18 |
| 3  | <b>343.1612</b>  | 172.0842        | 326.1347       | 163.5710         | 325.1506       | 163.0790         | Q    | 1991.0021        | 996.0047        | 1973.9756       | 987.4914         | 1972.9916      | 986.9994         | 17 |
| 4  | <b>456.2453</b>  | 228.6263        | 439.2187       | 220.1130         | 438.2347       | 219.6210         | I    | <b>1862.9436</b> | <b>931.9754</b> | 1845.9170       | 923.4621         | 1844.9330      | 922.9701         | 16 |
| 5  | <b>569.3293</b>  | 285.1683        | 552.3028       | 276.6550         | 551.3188       | 276.1630         | I    | 1749.8595        | 875.4334        | 1732.8329       | 866.9201         | 1731.8489      | 866.4281         | 15 |
| 6  | <b>668.3978</b>  | 334.7025        | 651.3712       | 326.1892         | 650.3872       | 325.6972         | V    | <b>1636.7754</b> | 818.8914        | 1619.7489       | 810.3781         | 1618.7649      | 809.8861         | 14 |
| 7  | 815.4662         | 408.2367        | 798.4396       | 399.7234         | 797.4556       | 399.2314         | F    | <b>1537.7070</b> | 769.3571        | 1520.6805       | 760.8439         | 1519.6965      | 760.3519         | 13 |
| 8  | 912.5189         | <b>456.7631</b> | 895.4924       | 448.2498         | 894.5084       | 447.7578         | P    | <b>1390.6386</b> | 695.8229        | 1373.6121       | 687.3097         | 1372.6280      | 686.8177         | 12 |
| 9  | 1041.5615        | 521.2844        | 1024.5350      | 512.7711         | 1023.5510      | 512.2791         | E    | <b>1293.5858</b> | 647.2966        | 1276.5593       | 638.7833         | 1275.5753      | 638.2913         | 11 |
| 10 | 1156.5885        | 578.7979        | 1139.5619      | 570.2846         | 1138.5779      | <b>569.7926</b>  | D    | <b>1164.5432</b> | 582.7753        | 1147.5167       | 574.2620         | 1146.5327      | 573.7700         | 10 |
| 11 | 1213.6099        | 607.3086        | 1196.5834      | 598.7953         | 1195.5994      | 598.3033         | G    | <b>1049.5163</b> | 525.2618        | 1032.4898       | 516.7485         | 1031.5057      | 516.2565         | 9  |
| 12 | 1326.6940        | 663.8506        | 1309.6674      | 655.3374         | 1308.6834      | 654.8454         | I    | 992.4948         | 496.7511        | 975.4683        | 488.2378         | 974.4843       | 487.7458         | 8  |
| 13 | <b>1463.7529</b> | 732.3801        | 1446.7264      | 723.8668         | 1445.7423      | 723.3748         | H    | <b>879.4108</b>  | 440.2090        | 862.3842        | 431.6958         | 861.4002       | 431.2037         | 7  |
| 14 | 1520.7744        | 760.8908        | 1503.7478      | 752.3775         | 1502.7638      | 751.8855         | G    | <b>742.3519</b>  | 371.6796        | 725.3253        | 363.1663         | 724.3413       | 362.6743         | 6  |
| 15 | 1667.8428        | 834.4250        | 1650.8162      | 825.9118         | 1649.8322      | 825.4197         | F    | 685.3304         | <b>343.1688</b> | <b>668.3039</b> | 334.6556         | 667.3198       | 334.1636         | 5  |
| 16 | 1782.8697        | 891.9385        | 1765.8432      | 883.4252         | 1764.8592      | 882.9332         | N    | 538.2620         | 269.6346        | 521.2354        | 261.1214         | 520.2514       | 260.6293         | 4  |
| 17 | 1929.9381        | 965.4727        | 1912.9116      | 956.9594         | 1911.9276      | 956.4674         | F    | 423.2350         | 212.1212        | 406.2085        | 203.6079         | 405.2245       | 203.1159         | 3  |
| 18 | 2030.9858        | 1015.9965       | 2013.9593      | 1007.4833        | 2012.9753      | 1006.9913        | T    | 276.1666         | 138.5870        | 259.1401        | 130.0737         | 258.1561       | 129.5817         | 2  |
| 19 |                  |                 |                |                  |                |                  | R    | 175.1190         | 88.0631         | 158.0924        | 79.5498          |                |                  | 1  |



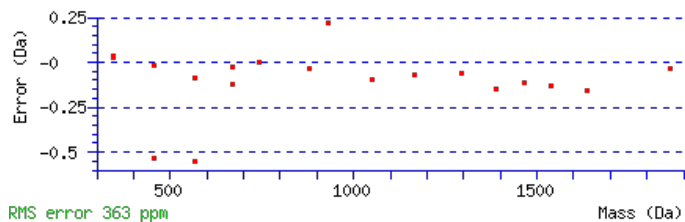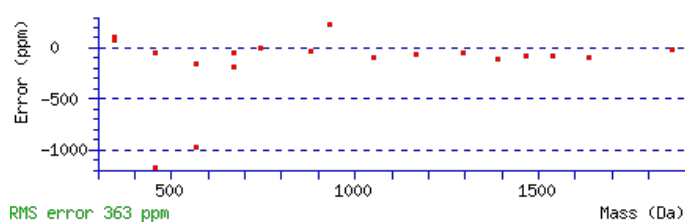

NCBI BLAST search of [DVQIIVFPEDGIHGDNFTR](#)

(Parameters: blastp, nr protein database, expect=20000, no filter, PAM30)

Other BLAST [web gateways](#)

All matches to this query

| Score | Mr(calc)  | Delta  | Sequence                              | Site Analysis          |
|-------|-----------|--------|---------------------------------------|------------------------|
| 75.8  | 2204.0902 | 0.0082 | <a href="#">DVQIIVFPEDGIHGDNFTR</a>   | Deamidated N16 100.00% |
| 18.0  | 2204.0902 | 0.0082 | <a href="#">DVQIIVFPEDGIHGDNFTR</a>   | Deamidated Q3 0.00%    |
| 10.2  | 2203.1062 | 0.9922 | <a href="#">DVQIIVFPEDGIHGDNFTR</a>   |                        |
| 5.4   | 2203.0952 | 1.0033 | <a href="#">LVKNLLGEMPLWVCQSCR</a>    |                        |
| 5.3   | 2204.0936 | 0.0049 | <a href="#">DEFLVKIYGAQHPLGLDVR</a>   |                        |
| 3.9   | 2203.0952 | 1.0033 | <a href="#">LVKNLLGEMPLWVCQSCR</a>    |                        |
| 1.5   | 2202.0838 | 2.0147 | <a href="#">DNTVGDLSKAKPINPQSKAAM</a> |                        |
| 1.5   | 2202.0838 | 2.0147 | <a href="#">DNTVGDLSKAKPINPQSKAAM</a> |                        |
| 1.4   | 2202.0986 | 1.9999 | <a href="#">SEMLEIVQAIYKMVSSVMK</a>   |                        |
| 1.2   | 2202.0986 | 1.9999 | <a href="#">AEMLEIVQAIYKMVSSVMK</a>   |                        |

Mascot: <http://www.matrixscience.com/>

# MASCOT SCIENCE Mascot Search Results

## Peptide View

MS/MS Fragmentation of **NPVGLIGAENATGETDPSHSKFLK**

Found in **A6NHF2** in **con\_Xuniprot\_HUMAN3**, A6NHF2\_HUMAN Biotinidase OS=Homo sapiens GN=BTD PE=2 SV=3

Match to Query 21519: 2482.246362 from(828.422730,3+) intensity(24984.1797) rtinseconds(1306) scans(3047) index(26044)

Title: 111019\_Est\_MI\_YS\_G\_08Spectrum2629\_scans\_\_3047

Data file C:\mascot\20140703\_Tmgf\_1D\CSV\_UseAnalysis\MasterCSV\All\_Glyco\mgf\ptm\UC18ERLIC\_PTM\_35D.mgf

Click mouse within plot area to zoom in by factor of two about that point

Or, to Da

Label all possible matches Label matches used for scoring

Show Y-axis

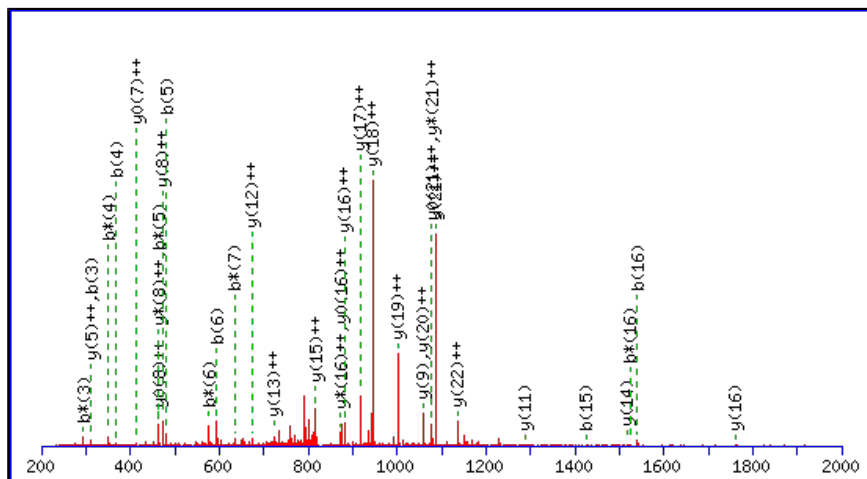

Monoisotopic mass of neutral peptide Mr(calc): 2482.2340

Fixed modifications: Carbamidomethyl (C) (apply to specified residues or termini only)

Variable modifications:

N10 : Deamidated (NQ)

Ions Score: 53 Expect: 0.0012

Matches : 35/252 fragment ions using 66 most intense peaks ([help](#))

| #  | b                | b <sup>++</sup> | b <sup>*</sup>   | b <sup>*++</sup> | b <sup>0</sup> | b <sup>0++</sup> | Seq. | y                | y <sup>++</sup>  | y <sup>*</sup> | y <sup>*++</sup> | y <sup>0</sup> | y <sup>0++</sup> | #  |
|----|------------------|-----------------|------------------|------------------|----------------|------------------|------|------------------|------------------|----------------|------------------|----------------|------------------|----|
| 1  | 115.0502         | 58.0287         | 98.0237          | 49.5155          |                |                  | N    |                  |                  |                |                  |                |                  | 24 |
| 2  | 212.1030         | 106.5551        | 195.0764         | 98.0418          |                |                  | P    | 2369.1983        | 1185.1028        | 2352.1718      | 1176.5895        | 2351.1878      | 1176.0975        | 23 |
| 3  | <b>311.1714</b>  | 156.0893        | <b>294.1448</b>  | 147.5761         |                |                  | V    | 2272.1456        | <b>1136.5764</b> | 2255.1190      | 1128.0631        | 2254.1350      | 1127.5711        | 22 |
| 4  | <b>368.1928</b>  | 184.6001        | <b>351.1663</b>  | 176.0868         |                |                  | G    | 2173.0772        | <b>1087.0422</b> | 2156.0506      | <b>1078.5289</b> | 2155.0666      | <b>1078.0369</b> | 21 |
| 5  | <b>481.2769</b>  | 241.1421        | <b>464.2504</b>  | 232.6288         |                |                  | L    | 2116.0557        | <b>1058.5315</b> | 2099.0291      | 1050.0182        | 2098.0451      | 1049.5262        | 20 |
| 6  | <b>594.3610</b>  | 297.6841        | <b>577.3344</b>  | 289.1709         |                |                  | I    | 2002.9716        | <b>1001.9895</b> | 1985.9451      | 993.4762         | 1984.9611      | 992.9842         | 19 |
| 7  | 651.3824         | 326.1949        | <b>634.3559</b>  | 317.6816         |                |                  | G    | 1889.8876        | <b>945.4474</b>  | 1872.8610      | 936.9341         | 1871.8770      | 936.4421         | 18 |
| 8  | 722.4196         | 361.7134        | 705.3930         | 353.2001         |                |                  | A    | 1832.8661        | <b>916.9367</b>  | 1815.8396      | 908.4234         | 1814.8555      | 907.9314         | 17 |
| 9  | 851.4621         | 426.2347        | 834.4356         | 417.7214         | 833.4516       | 417.2294         | E    | <b>1761.8290</b> | <b>881.4181</b>  | 1744.8024      | <b>872.9049</b>  | 1743.8184      | <b>872.4128</b>  | 16 |
| 10 | 966.4891         | 483.7482        | 949.4625         | 475.2349         | 948.4785       | 474.7429         | N    | 1632.7864        | <b>816.8968</b>  | 1615.7598      | 808.3836         | 1614.7758      | 807.8916         | 15 |
| 11 | 1037.5262        | 519.2667        | 1020.4997        | 510.7535         | 1019.5156      | 510.2615         | A    | <b>1517.7594</b> | 759.3834         | 1500.7329      | 750.8701         | 1499.7489      | 750.3781         | 14 |
| 12 | 1138.5739        | 569.7906        | 1121.5473        | 561.2773         | 1120.5633      | 560.7853         | T    | 1446.7223        | <b>723.8648</b>  | 1429.6958      | 715.3515         | 1428.7118      | 714.8595         | 13 |
| 13 | 1195.5953        | 598.3013        | 1178.5688        | 589.7880         | 1177.5848      | 589.2960         | G    | 1345.6747        | <b>673.3410</b>  | 1328.6481      | 664.8277         | 1327.6641      | 664.3357         | 12 |
| 14 | 1324.6379        | 662.8226        | 1307.6114        | 654.3093         | 1306.6274      | 653.8173         | E    | <b>1288.6532</b> | 644.8302         | 1271.6266      | 636.3170         | 1270.6426      | 635.8250         | 11 |
| 15 | <b>1425.6856</b> | 713.3464        | 1408.6591        | 704.8332         | 1407.6751      | 704.3412         | T    | 1159.6106        | 580.3089         | 1142.5841      | 571.7957         | 1141.6000      | 571.3037         | 10 |
| 16 | <b>1540.7126</b> | 770.8599        | <b>1523.6860</b> | 762.3466         | 1522.7020      | 761.8546         | D    | <b>1058.5629</b> | 529.7851         | 1041.5364      | 521.2718         | 1040.5524      | 520.7798         | 9  |
| 17 | 1637.7653        | 819.3863        | 1620.7388        | 810.8730         | 1619.7548      | 810.3810         | P    | 943.5360         | <b>472.2716</b>  | 926.5094       | <b>463.7584</b>  | 925.5254       | <b>463.2663</b>  | 8  |
| 18 | 1724.7974        | 862.9023        | 1707.7708        | 854.3890         | 1706.7868      | 853.8970         | S    | 846.4832         | 423.7452         | 829.4567       | 415.2320         | 828.4726       | <b>414.7400</b>  | 7  |
| 19 | 1861.8563        | 931.4318        | 1844.8297        | 922.9185         | 1843.8457      | 922.4265         | H    | 759.4512         | 380.2292         | 742.4246       | 371.7160         | 741.4406       | 371.2239         | 6  |
| 20 | 1948.8883        | 974.9478        | 1931.8617        | 966.4345         | 1930.8777      | 965.9425         | S    | 622.3923         | <b>311.6998</b>  | 605.3657       | 303.1865         | 604.3817       | 302.6945         | 5  |
| 21 | 2076.9833        | 1038.9953       | 2059.9567        | 1030.4820        | 2058.9727      | 1029.9900        | K    | 535.3602         | 268.1838         | 518.3337       | 259.6705         |                |                  | 4  |
| 22 | 2224.0517        | 1112.5295       | 2207.0251        | 1104.0162        | 2206.0411      | 1103.5242        | F    | 407.2653         | 204.1363         | 390.2387       | 195.6230         |                |                  | 3  |
| 23 | 2337.1357        | 1169.0715       | 2320.1092        | 1160.5582        | 2319.1252      | 1160.0662        | L    | 260.1969         | 130.6021         | 243.1703       | 122.0888         |                |                  | 2  |

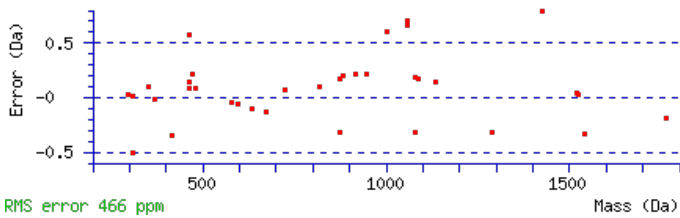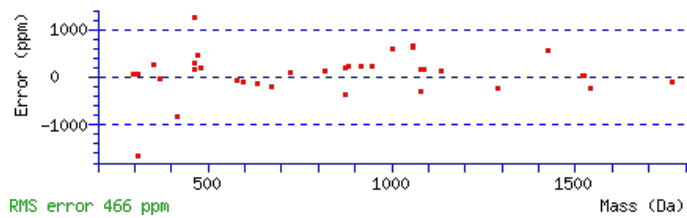

NCBI BLAST search of [NPVGLIGAENATGETDPSHSKFLK](#)  
 (Parameters: blastp, nr protein database, expect=20000, no filter, PAM30)  
 Other BLAST [web gateways](#)

All matches to this query

| Score | Mr(calc)  | Delta   | Sequence                                  | Site Analysis         |
|-------|-----------|---------|-------------------------------------------|-----------------------|
| 53.5  | 2482.2340 | 0.0124  | <a href="#">NPVGLIGAENATGETDPSHSKFLK</a>  | Deamidated N10 91.21% |
| 46.3  | 2481.2500 | 0.9964  | <a href="#">NPVGLIGAENATGETDPSHSKFLK</a>  |                       |
| 43.3  | 2482.2340 | 0.0124  | <a href="#">NPVGLIGAENATGETDPSHSKFLK</a>  | Deamidated N1 8.79%   |
| 8.7   | 2482.2526 | -0.0062 | <a href="#">NVPVLENDTETNLAGMYGKVRK</a>    |                       |
| 5.8   | 2482.2526 | -0.0062 | <a href="#">NVPVLENDTETNLAGMYGKVRK</a>    |                       |
| 5.6   | 2480.2509 | 1.9955  | <a href="#">LPVLAPAPASPPSPDPPTEVTPAEM</a> |                       |
| 5.0   | 2480.2324 | 2.0139  | <a href="#">RAVSAAMLMATSANQITAVPLVTM</a>  |                       |
| 4.5   | 2482.2526 | -0.0062 | <a href="#">NVPVLENDTETNLAGMYGKVRK</a>    |                       |
| 2.8   | 2480.2506 | 1.9957  | <a href="#">LHGVKLEALNQSINIEQSQSDR</a>    |                       |
| 2.8   | 2480.2506 | 1.9957  | <a href="#">LHGVKLEALNQSINIEQSQSDR</a>    |                       |

Mascot: <http://www.matrixscience.com/>

# MATRIX SCIENCE Mascot Search Results

## Peptide View

MS/MS Fragmentation of **SHLIAQVAKNPVGLIGAENATGETDPSHSKFLK**

Found in **A6NHF2** in **con\_Xuniprot\_HUMAN3**, A6NHF2\_HUMAN Biotinidase OS=Homo sapiens GN=BTD PE=2 SV=3

Match to Query 27811: 3542.874820 from(709.582240,5+) intensity(36290.4102) rtinseconds(1653) scans(4108) index(25355)

Title: 111019\_Est\_ML\_YS\_G\_07Spectrum3496\_scans\_\_4108

Data file C:\mascot\20140703\_Tmgf\_1D\CSV\_UseAnalysis\MasterCSV\All\_Glyco\mgf\ptm\UC18ERLIC\_PTM\_35D.mgf

Click mouse within plot area to zoom in by factor of two about that point

Or, to Da

Label all possible matches Label matches used for scoring

Show Y-axis

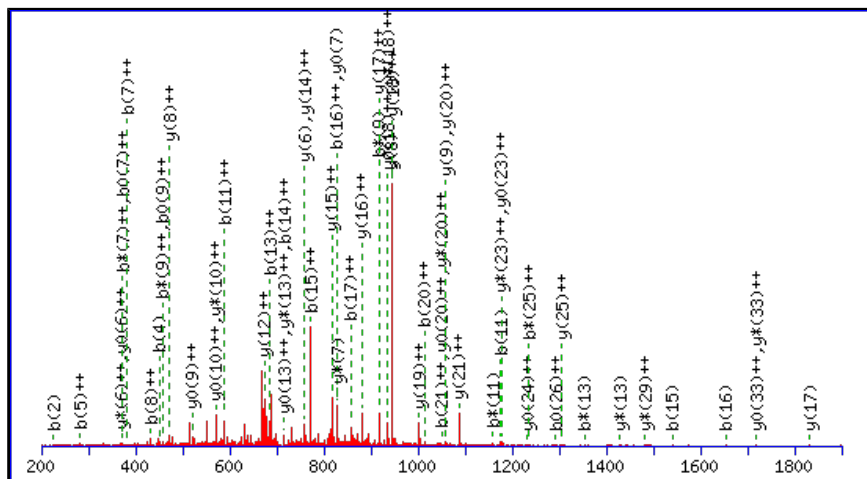

Monoisotopic mass of neutral peptide Mr(calc): 3542.8733

Fixed modifications: Carbamidomethyl (C) (apply to specified residues or termini only)

Variable modifications:

N20 : Deamidated (NQ)

Ions Score: 50 Expect: 0.00089

Matches : 60/376 fragment ions using 97 most intense peaks ([help](#))

| #  | b                | b <sup>++</sup>  | b <sup>*</sup>   | b <sup>*++</sup> | b <sup>0</sup> | b <sup>0++</sup> | Seq. | y                | y <sup>++</sup>  | y <sup>*</sup>   | y <sup>*++</sup> | y <sup>0</sup> | y <sup>0++</sup> | #  |
|----|------------------|------------------|------------------|------------------|----------------|------------------|------|------------------|------------------|------------------|------------------|----------------|------------------|----|
| 1  | 88.0393          | 44.5233          |                  |                  | 70.0287        | 35.5180          | S    |                  |                  |                  |                  |                |                  | 34 |
| 2  | <b>225.0982</b>  | 113.0527         |                  |                  | 207.0877       | 104.0475         | H    | 3456.8485        | 1728.9279        | 3439.8220        | <b>1720.4146</b> | 3438.8380      | <b>1719.9226</b> | 33 |
| 3  | 338.1823         | 169.5948         |                  |                  | 320.1717       | 160.5895         | L    | 3319.7896        | 1660.3985        | 3302.7631        | 1651.8852        | 3301.7791      | 1651.3932        | 32 |
| 4  | <b>451.2663</b>  | 226.1368         |                  |                  | 433.2558       | 217.1315         | I    | 3206.7056        | 1603.8564        | 3189.6790        | 1595.3431        | 3188.6950      | 1594.8511        | 31 |
| 5  | 564.3504         | <b>282.6788</b>  |                  |                  | 546.3398       | 273.6736         | I    | 3093.6215        | 1547.3144        | 3076.5950        | 1538.8011        | 3075.6109      | 1538.3091        | 30 |
| 6  | 635.3875         | 318.1974         |                  |                  | 617.3770       | 309.1921         | A    | 2980.5374        | 1490.7724        | 2963.5109        | <b>1482.2591</b> | 2962.5269      | 1481.7671        | 29 |
| 7  | 763.4461         | <b>382.2267</b>  | 746.4196         | <b>373.7134</b>  | 745.4355       | <b>373.2214</b>  | Q    | 2909.5003        | 1455.2538        | 2892.4738        | 1446.7405        | 2891.4898      | 1446.2485        | 28 |
| 8  | 862.5145         | <b>431.7609</b>  | 845.4880         | 423.2476         | 844.5039       | 422.7556         | V    | 2781.4418        | 1391.2245        | 2764.4152        | 1382.7112        | 2763.4312      | 1382.2192        | 27 |
| 9  | 933.5516         | 467.2795         | <b>916.5251</b>  | <b>458.7662</b>  | 915.5411       | <b>458.2742</b>  | A    | 2682.3733        | 1341.6903        | 2665.3468        | 1333.1770        | 2664.3628      | 1332.6850        | 26 |
| 10 | 1061.6466        | 531.3269         | 1044.6200        | 522.8137         | 1043.6360      | 522.3217         | K    | 2611.3362        | <b>1306.1717</b> | 2594.3097        | 1297.6585        | 2593.3257      | 1297.1665        | 25 |
| 11 | <b>1175.6895</b> | <b>588.3484</b>  | <b>1158.6630</b> | 579.8351         | 1157.6790      | 579.3431         | N    | 2483.2413        | 1242.1243        | 2466.2147        | 1233.6110        | 2465.2307      | <b>1233.1190</b> | 24 |
| 12 | 1272.7423        | 636.8748         | 1255.7157        | 628.3615         | 1254.7317      | 627.8695         | P    | 2369.1983        | 1185.1028        | 2352.1718        | <b>1176.5895</b> | 2351.1878      | <b>1176.0975</b> | 23 |
| 13 | 1371.8107        | <b>686.4090</b>  | <b>1354.7841</b> | 677.8957         | 1353.8001      | 677.4037         | V    | 2272.1456        | 1136.5764        | 2255.1190        | 1128.0631        | 2254.1350      | 1127.5711        | 22 |
| 14 | 1428.8322        | <b>714.9197</b>  | 1411.8056        | 706.4064         | 1410.8216      | 705.9144         | G    | 2173.0772        | <b>1087.0422</b> | 2156.0506        | 1078.5289        | 2155.0666      | 1078.0369        | 21 |
| 15 | <b>1541.9162</b> | <b>771.4617</b>  | 1524.8897        | 762.9485         | 1523.9057      | 762.4565         | L    | 2116.0557        | <b>1058.5315</b> | 2099.0291        | <b>1050.0182</b> | 2098.0451      | <b>1049.5262</b> | 20 |
| 16 | <b>1655.0003</b> | <b>828.0038</b>  | 1637.9737        | 819.4905         | 1636.9897      | 818.9985         | I    | 2002.9716        | <b>1001.9895</b> | 1985.9451        | 993.4762         | 1984.9611      | 992.9842         | 19 |
| 17 | 1712.0218        | <b>856.5145</b>  | 1694.9952        | 848.0012         | 1694.0112      | 847.5092         | G    | 1889.8876        | <b>945.4474</b>  | 1872.8610        | <b>936.9341</b>  | 1871.8770      | <b>936.4421</b>  | 18 |
| 18 | 1783.0589        | 892.0331         | 1766.0323        | 883.5198         | 1765.0483      | 883.0278         | A    | <b>1832.8661</b> | <b>916.9367</b>  | 1815.8395        | 908.4234         | 1814.8555      | 907.9314         | 17 |
| 19 | 1912.1015        | 956.5544         | 1895.0749        | 948.0411         | 1894.0909      | 947.5491         | E    | 1761.8290        | <b>881.4181</b>  | 1744.8024        | 872.9049         | 1743.8184      | 872.4128         | 16 |
| 20 | 2027.1284        | <b>1014.0678</b> | 2010.1019        | 1005.5546        | 2009.1178      | 1005.0626        | N    | 1632.7864        | <b>816.8968</b>  | 1615.7598        | 808.3836         | 1614.7758      | 807.8916         | 15 |
| 21 | 2098.1655        | <b>1049.5864</b> | 2081.1390        | 1041.0731        | 2080.1550      | 1040.5811        | A    | 1517.7594        | <b>759.3834</b>  | 1500.7329        | 750.8701         | 1499.7489      | 750.3781         | 14 |
| 22 | 2199.2132        | 1100.1102        | 2182.1866        | 1091.5970        | 2181.2026      | 1091.1050        | T    | 1446.7223        | 723.8648         | <b>1429.6958</b> | <b>715.3515</b>  | 1428.7118      | <b>714.8595</b>  | 13 |
| 23 | 2256.2347        | 1128.6210        | 2239.2081        | 1120.1077        | 2238.2241      | 1119.6157        | G    | 1345.6747        | <b>673.3410</b>  | 1328.6481        | 664.8277         | 1327.6641      | 664.3357         | 12 |

|    |           |           |           |           |           |           |   |           |          |           |          |           |          |    |
|----|-----------|-----------|-----------|-----------|-----------|-----------|---|-----------|----------|-----------|----------|-----------|----------|----|
| 24 | 2385.2773 | 1193.1423 | 2368.2507 | 1184.6290 | 2367.2667 | 1184.1370 | E | 1288.6532 | 644.8302 | 1271.6266 | 636.3170 | 1270.6426 | 635.8250 | 11 |
| 25 | 2486.3249 | 1243.6661 | 2469.2984 | 1235.1528 | 2468.3144 | 1234.6608 | T | 1159.6106 | 580.3089 | 1142.5840 | 571.7957 | 1141.6000 | 571.3037 | 10 |
| 26 | 2601.3519 | 1301.1796 | 2584.3253 | 1292.6663 | 2583.3413 | 1292.1743 | D | 1058.5629 | 529.7851 | 1041.5364 | 521.2718 | 1040.5524 | 520.7798 | 9  |
| 27 | 2698.4046 | 1349.7060 | 2681.3781 | 1341.1927 | 2680.3941 | 1340.7007 | P | 943.5360  | 472.2716 | 926.5094  | 463.7584 | 925.5254  | 463.2663 | 8  |
| 28 | 2785.4367 | 1393.2220 | 2768.4101 | 1384.7087 | 2767.4261 | 1384.2167 | S | 846.4832  | 423.7452 | 829.4567  | 415.2320 | 828.4726  | 414.7400 | 7  |
| 29 | 2922.4956 | 1461.7514 | 2905.4690 | 1453.2382 | 2904.4850 | 1452.7461 | H | 759.4512  | 380.2292 | 742.4246  | 371.7160 | 741.4406  | 371.2239 | 6  |
| 30 | 3009.5276 | 1505.2674 | 2992.5011 | 1496.7542 | 2991.5170 | 1496.2622 | S | 622.3923  | 311.6998 | 605.3657  | 303.1865 | 604.3817  | 302.6945 | 5  |
| 31 | 3137.6226 | 1569.3149 | 3120.5960 | 1560.8016 | 3119.6120 | 1560.3096 | K | 535.3602  | 268.1838 | 518.3337  | 259.6705 |           |          | 4  |
| 32 | 3284.6910 | 1642.8491 | 3267.6644 | 1634.3359 | 3266.6804 | 1633.8438 | F | 407.2653  | 204.1363 | 390.2387  | 195.6230 |           |          | 3  |
| 33 | 3397.7750 | 1699.3912 | 3380.7485 | 1690.8779 | 3379.7645 | 1690.3859 | L | 260.1969  | 130.6021 | 243.1703  | 122.0888 |           |          | 2  |
| 34 |           |           |           |           |           |           | K | 147.1128  | 74.0600  | 130.0863  | 65.5468  |           |          | 1  |

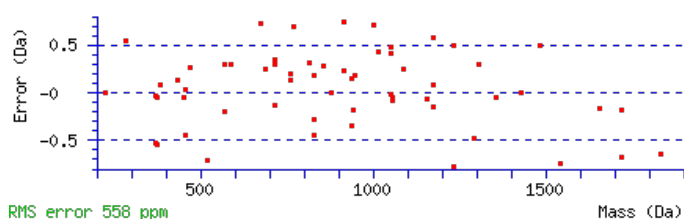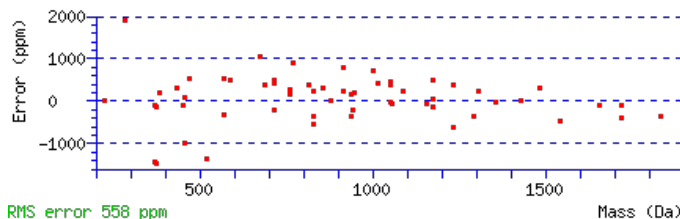

NCBI BLAST search of [SHLIIAQVAKNPVGLIGAENATGETDPSHSKFLK](#)  
 (Parameters: blastp, nr protein database, expect=20000, no filter, PAM30)  
 Other BLAST [web gateways](#)

All matches to this query

| Score | Mr(calc)  | Delta   | Sequence                                           | Site Analysis         |
|-------|-----------|---------|----------------------------------------------------|-----------------------|
| 50.2  | 3542.8733 | 0.0016  | <a href="#">SHLIIAQVAKNPVGLIGAENATGETDPSHSKFLK</a> | Deamidated N20 56.65% |
| 46.5  | 3542.8733 | 0.0016  | <a href="#">SHLIIAQVAKNPVGLIGAENATGETDPSHSKFLK</a> | Deamidated Q7 24.11%  |
| 45.5  | 3542.8733 | 0.0016  | <a href="#">SHLIIAQVAKNPVGLIGAENATGETDPSHSKFLK</a> | Deamidated N11 19.24% |
| 38.4  | 3541.8893 | 0.9856  | <a href="#">SHLIIAQVAKNPVGLIGAENATGETDPSHSKFLK</a> |                       |
| 7.5   | 3541.8598 | 1.0150  | <a href="#">MQPVTIASLQASVLPVSMVGVQLSPPVTFQLR</a>   |                       |
| 5.9   | 3540.8659 | 2.0089  | <a href="#">AVISLLEFLAVMYVVHHPLMVSDRMDLDTLAR</a>   |                       |
| 5.8   | 3540.8690 | 2.0058  | <a href="#">VPLYAVMYPVFNELERVNLSAAQTLRAAFIK</a>    |                       |
| 5.2   | 3542.8845 | -0.0097 | <a href="#">VTELTEATGKLIRTSHTGKPHQSFQAAATQK</a>    |                       |
| 5.2   | 3541.8766 | 0.9982  | <a href="#">LQLTNDNEGKGNLWVTTLATQSGLIERVLLK</a>    |                       |
| 4.8   | 3541.8637 | 1.0112  | <a href="#">VMQLLSPTVLPAGVDERPPGGGKSCGVPEKQPLK</a> |                       |

Mascot: <http://www.matrixscience.com/>

# MATRIX SCIENCE Mascot Search Results

## Peptide View

MS/MS Fragmentation of **WNVNAPPTFHSEMMYDNFTLVPVWGK**

Found in **A6NHF2** in **con\_Xuniprot\_HUMAN3**, A6NHF2\_HUMAN Biotinidase OS=Homo sapiens GN=BTD PE=2 SV=3

Match to Query 27322: 3112.421802 from(1038.481210,3+) intensity(18124.8027) rtinseconds(2303) scans(5686) index(12021)

Title: 111019\_Est\_ISCardio\_NMI\_YS\_G\_8Spectrum4930\_scans\_\_5686

Data file C:\mascot\20140703\_Tmgf\_1D\CSV\_UseAnalysis\MasterCSV\All\_Glyco\mgf\ptm\UC18ERLIC\_PTM\_35D.mgf

Click mouse within plot area to zoom in by factor of two about that point

Or, to Da

Label all possible matches Label matches used for scoring

Show Y-axis

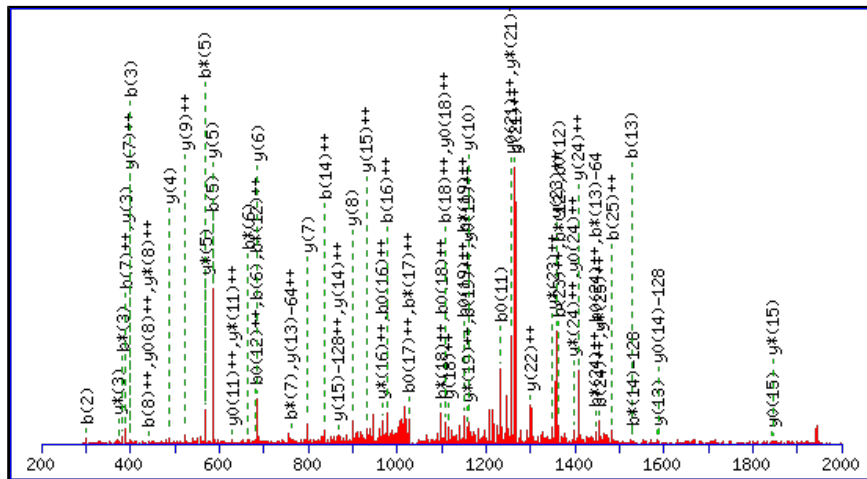

Monoisotopic mass of neutral peptide Mr(calc): 3112.4099

Fixed modifications: Carbamidomethyl (C) (apply to specified residues or termini only)

Variable modifications:

M13 : Oxidation (M), with neutral losses 0.0000 (shown in table), 63.9983

M14 : Oxidation (M), with neutral losses 0.0000 (shown in table), 63.9983

N17 : Deamidated (NQ)

Ions Score: 43 Expect: 0.0082

Matches : 75/426 fragment ions using 120 most intense peaks (help)

| #  | b                | b <sup>++</sup>  | b <sup>*</sup>   | b <sup>*++</sup> | b <sup>0</sup>   | b <sup>0++</sup> | Seq. | y                | y <sup>++</sup>  | y <sup>*</sup>   | y <sup>*++</sup> | y <sup>0</sup>   | y <sup>0++</sup> | #  |
|----|------------------|------------------|------------------|------------------|------------------|------------------|------|------------------|------------------|------------------|------------------|------------------|------------------|----|
| 1  | 187.0866         | 94.0469          |                  |                  |                  |                  | W    |                  |                  |                  |                  |                  |                  | 26 |
| 2  | <b>301.1295</b>  | 151.0684         | 284.1030         | 142.5551         |                  |                  | N    | 2927.3379        | 1464.1726        | 2910.3113        | <b>1455.6593</b> | 2909.3273        | 1455.1673        | 25 |
| 3  | <b>400.1979</b>  | 200.6026         | <b>383.1714</b>  | 192.0893         |                  |                  | V    | 2813.2950        | <b>1407.1511</b> | 2796.2684        | <b>1398.6378</b> | 2795.2844        | <b>1398.1458</b> | 24 |
| 4  | 514.2409         | 257.6241         | 497.2143         | 249.1108         |                  |                  | N    | 2714.2265        | <b>1357.6169</b> | 2697.2000        | <b>1349.1036</b> | 2696.2160        | 1348.6116        | 23 |
| 5  | <b>585.2780</b>  | 293.1426         | <b>568.2514</b>  | 284.6293         |                  |                  | A    | 2600.1836        | <b>1300.5954</b> | 2583.1571        | 1292.0822        | 2582.1730        | 1291.5902        | 22 |
| 6  | <b>682.3307</b>  | 341.6690         | <b>665.3042</b>  | 333.1557         |                  |                  | P    | 2529.1465        | <b>1265.0769</b> | 2512.1199        | <b>1256.5636</b> | 2511.1359        | <b>1256.0716</b> | 21 |
| 7  | 779.3835         | <b>390.1954</b>  | <b>762.3570</b>  | 381.6821         |                  |                  | P    | 2432.0937        | 1216.5505        | 2415.0672        | 1208.0372        | 2414.0832        | 1207.5452        | 20 |
| 8  | 880.4312         | <b>440.7192</b>  | 863.4046         | 432.2060         | 862.4206         | 431.7139         | T    | 2335.0410        | 1168.0241        | 2318.0144        | <b>1159.5108</b> | 2317.0304        | <b>1159.0188</b> | 19 |
| 9  | 1027.4996        | 514.2534         | 1010.4730        | 505.7402         | 1009.4890        | 505.2482         | F    | 2233.9933        | <b>1117.5003</b> | 2216.9667        | 1108.9870        | 2215.9827        | <b>1108.4950</b> | 18 |
| 10 | 1164.5585        | 582.7829         | 1147.5320        | 574.2696         | 1146.5479        | 573.7776         | H    | 2086.9249        | 1043.9661        | 2069.8983        | 1035.4528        | 2068.9143        | 1034.9608        | 17 |
| 11 | 1251.5905        | 626.2989         | 1234.5640        | 617.7856         | <b>1233.5800</b> | 617.2936         | S    | 1949.8660        | 975.4366         | 1932.8394        | <b>966.9233</b>  | 1931.8554        | 966.4313         | 16 |
| 12 | 1380.6331        | 690.8202         | <b>1363.6066</b> | <b>682.3069</b>  | <b>1362.6226</b> | <b>681.8149</b>  | E    | 1862.8339        | <b>931.9206</b>  | <b>1845.8074</b> | 923.4073         | <b>1844.8234</b> | 922.9153         | 15 |
| 13 | <b>1527.6685</b> | 764.3379         | 1510.6420        | 755.8246         | 1509.6580        | 755.3326         | M    | 1733.7913        | <b>867.3993</b>  | 1716.7648        | 858.8860         | 1715.7808        | 858.3940         | 14 |
| 14 | 1674.7039        | <b>837.8556</b>  | 1657.6774        | 829.3423         | 1656.6934        | 828.8503         | M    | <b>1586.7559</b> | 793.8816         | 1569.7294        | 785.3683         | 1568.7454        | 784.8763         | 13 |
| 15 | 1837.7673        | 919.3873         | 1820.7407        | 910.8740         | 1819.7567        | 910.3820         | Y    | 1439.7205        | 720.3639         | 1422.6940        | 711.8506         | 1421.7100        | 711.3586         | 12 |
| 16 | 1952.7942        | <b>976.9007</b>  | 1935.7676        | 968.3875         | 1934.7836        | <b>967.8955</b>  | D    | 1276.6572        | 638.8322         | 1259.6307        | <b>630.3190</b>  | 1258.6467        | <b>629.8270</b>  | 11 |
| 17 | 2067.8211        | 1034.4142        | 2050.7946        | <b>1025.9009</b> | 2049.8106        | <b>1025.4089</b> | N    | <b>1161.6303</b> | 581.3188         | 1144.6037        | 572.8055         | 1143.6197        | 572.3135         | 10 |
| 18 | 2214.8896        | <b>1107.9484</b> | 2197.8630        | <b>1099.4351</b> | 2196.8790        | <b>1098.9431</b> | F    | 1046.6033        | <b>523.8053</b>  | 1029.5768        | 515.2920         | 1028.5928        | 514.8000         | 9  |
| 19 | 2315.9372        | <b>1158.4723</b> | 2298.9107        | <b>1149.9590</b> | 2297.9267        | <b>1149.4670</b> | T    | <b>899.5349</b>  | 450.2711         | 882.5084         | <b>441.7578</b>  | 881.5244         | <b>441.2658</b>  | 8  |
| 20 | 2429.0213        | 1215.0143        | 2411.9947        | 1206.5010        | 2411.0107        | 1206.0090        | L    | <b>798.4872</b>  | <b>399.7473</b>  | 781.4607         | 391.2340         |                  |                  | 7  |
| 21 | 2528.0897        | <b>1264.5485</b> | 2511.0632        | <b>1256.0352</b> | 2510.0791        | <b>1255.5432</b> | V    | <b>685.4032</b>  | 343.2052         | 668.3766         | 334.6919         |                  |                  | 6  |
| 22 | 2625.1425        | 1313.0749        | 2608.1159        | 1304.5616        | 2607.1319        | 1304.0696        | P    | <b>586.3348</b>  | 293.6710         | <b>569.3082</b>  | 285.1577         |                  |                  | 5  |



|    |           |                  |           |                  |           |                  |   |                 |          |                 |          |  |  |   |
|----|-----------|------------------|-----------|------------------|-----------|------------------|---|-----------------|----------|-----------------|----------|--|--|---|
| 23 | 2724.2109 | <b>1362.6091</b> | 2707.1843 | 1354.0958        | 2706.2003 | 1353.6038        | V | <b>489.2820</b> | 245.1446 | 472.2554        | 236.6314 |  |  | 4 |
| 24 | 2910.2902 | <b>1455.6487</b> | 2893.2637 | <b>1447.1355</b> | 2892.2796 | <b>1446.6435</b> | W | <b>390.2136</b> | 195.6104 | <b>373.1870</b> | 187.0972 |  |  | 3 |
| 25 | 2967.3117 | <b>1484.1595</b> | 2950.2851 | 1475.6462        | 2949.3011 | 1475.1542        | G | 204.1343        | 102.5708 | 187.1077        | 94.0575  |  |  | 2 |
| 26 |           |                  |           |                  |           |                  | K | 147.1128        | 74.0600  | 130.0863        | 65.5468  |  |  | 1 |

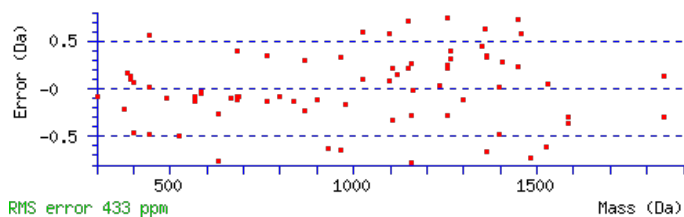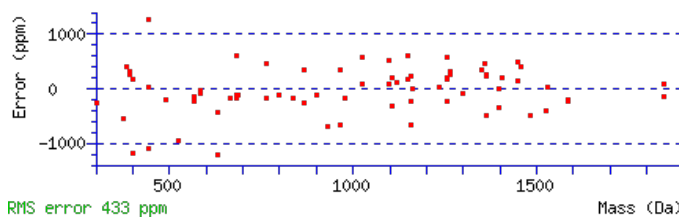

NCBI **BLAST** search of [WNVNAPPTFHSEMMYDNFTLVPVWGK](#)  
 (Parameters: blastp, nr protein database, expect=20000, no filter, PAM30)  
 Other BLAST [web gateways](#)

**All matches to this query**

| Score | Mr(calc)  | Delta  | Sequence                                     | Site Analysis         |
|-------|-----------|--------|----------------------------------------------|-----------------------|
| 43.3  | 3112.4099 | 0.0119 | <a href="#">WNVNAPPTFHSEMMYDNFTLVPVWGK</a>   | Deamidated N17 96.83% |
| 30.3  | 3111.4259 | 0.9959 | <a href="#">WNVNAPPTFHSEMMYDNFTLVPVWGK</a>   |                       |
| 26.2  | 3112.4099 | 0.0119 | <a href="#">WNVNAPPTFHSEMMYDNFTLVPVWGK</a>   | Deamidated N4 1.92%   |
| 24.4  | 3112.4099 | 0.0119 | <a href="#">WNVNAPPTFHSEMMYDNFTLVPVWGK</a>   | Deamidated N2 1.26%   |
| 7.3   | 3111.4316 | 0.9902 | <a href="#">QIGPDARPRNQSSTYTATSWLDMEQSR</a>  |                       |
| 6.7   | 3111.4316 | 0.9902 | <a href="#">QIGPDARPRNQSSTYTATSWLDMEQSR</a>  |                       |
| 4.9   | 3111.4246 | 0.9972 | <a href="#">VILALGDYMGATCHACIGGTNVRNEMQK</a> |                       |
| 4.3   | 3111.4317 | 0.9901 | <a href="#">MKLNPQNSEVMPWDPPYYSGVIRAER</a>   |                       |
| 3.9   | 3111.4316 | 0.9902 | <a href="#">QIGPDARPRNQSSTYTATSWLDMEQSR</a>  |                       |
| 1.6   | 3111.4059 | 1.0159 | <a href="#">ANRNAEEFELTNIDMVQCDVCLLSNR</a>   |                       |

Mascot: <http://www.matrixscience.com/>

# MATRIX SCIENCE Mascot Search Results

## Peptide View

MS/MS Fragmentation of **WNVNAPPTFHSEMMYDNFTLVPVWGK**

Found in **A6NHF2** in **con\_Xuniprot\_HUMAN3**, A6NHF2\_HUMAN Biotinidase OS=Homo sapiens GN=BTD PE=2 SV=3

Match to Query 27315: 3096.428472 from(1033.150100,3+) intensity(32956.5078) rtinseconds(2419) scans(6013) index(12057)

Title: 111019\_Est\_ISCardio\_NMI\_YS\_G\_8Spectrum5219\_scans\_\_6013

Data file C:\mascot\20140703\_Tmgf\_1D\CSV\_UseAnalysis\MasterCSV\All\_Glyco\mgf\ptm\UC18ERLIC\_PTM\_35D.mgf

Click mouse within plot area to zoom in by factor of two about that point

Or, to Da

Label all possible matches Label matches used for scoring

Show Y-axis

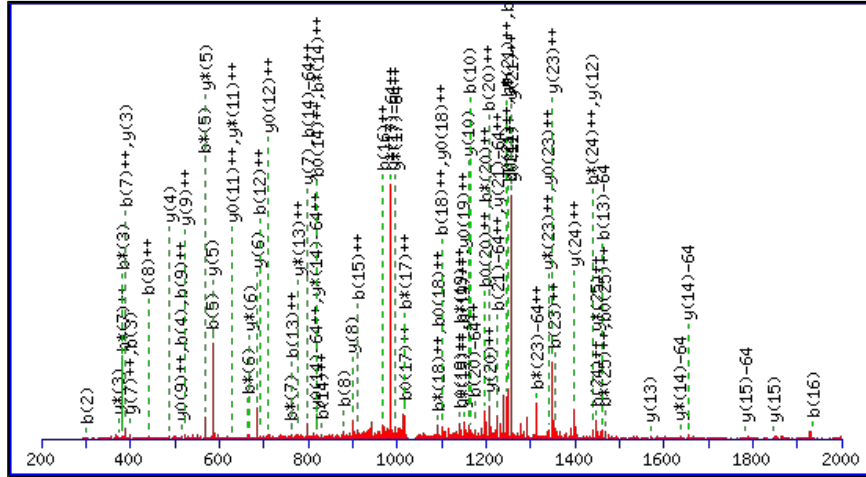

Monoisotopic mass of neutral peptide Mr(calc): 3096.4150

Fixed modifications: Carbamidomethyl (C) (apply to specified residues or termini only)

Variable modifications:

M13 : Oxidation (M), with neutral losses 0.0000(shown in table), 63.9983

N17 : Deamidated (NQ)

Ions Score: 38 Expect: 0.033

Matches : 87/420 fragment ions using 173 most intense peaks ([help](#))

| #  | b                | b <sup>++</sup>  | b <sup>*</sup>  | b <sup>*++</sup> | b <sup>0</sup> | b <sup>0++</sup> | Seq. | y                | y <sup>++</sup>  | y <sup>*</sup>  | y <sup>*++</sup> | y <sup>0</sup>   | y <sup>0++</sup> | #  |
|----|------------------|------------------|-----------------|------------------|----------------|------------------|------|------------------|------------------|-----------------|------------------|------------------|------------------|----|
| 1  | 187.0866         | 94.0469          |                 |                  |                |                  | W    |                  |                  |                 |                  |                  |                  | 26 |
| 2  | <b>301.1295</b>  | 151.0684         | 284.1030        | 142.5551         |                |                  | N    | 2911.3430        | 1456.1751        | 2894.3164       | <b>1447.6618</b> | 2893.3324        | 1447.1698        | 25 |
| 3  | <b>400.1979</b>  | 200.6026         | <b>383.1714</b> | 192.0893         |                |                  | V    | 2797.3000        | <b>1399.1537</b> | 2780.2735       | 1390.6404        | 2779.2895        | 1390.1484        | 24 |
| 4  | <b>514.2409</b>  | 257.6241         | 497.2143        | 249.1108         |                |                  | N    | 2698.2316        | <b>1349.6195</b> | 2681.2051       | <b>1341.1062</b> | 2680.2211        | <b>1340.6142</b> | 23 |
| 5  | <b>585.2780</b>  | 293.1426         | <b>568.2514</b> | 284.6293         |                |                  | A    | 2584.1887        | 1292.5980        | 2567.1621       | 1284.0847        | 2566.1781        | 1283.5927        | 22 |
| 6  | 682.3307         | 341.6690         | <b>665.3042</b> | 333.1557         |                |                  | P    | 2513.1516        | <b>1257.0794</b> | 2496.1250       | <b>1248.5662</b> | 2495.1410        | <b>1248.0741</b> | 21 |
| 7  | 779.3835         | <b>390.1954</b>  | <b>762.3570</b> | <b>381.6821</b>  |                |                  | P    | 2416.0988        | <b>1208.5530</b> | 2399.0723       | 1200.0398        | 2398.0883        | 1199.5478        | 20 |
| 8  | <b>880.4312</b>  | <b>440.7192</b>  | 863.4046        | 432.2060         | 862.4206       | 431.7139         | T    | 2319.0461        | 1160.0267        | 2302.0195       | <b>1151.5134</b> | 2301.0355        | <b>1151.0214</b> | 19 |
| 9  | 1027.4996        | <b>514.2534</b>  | 1010.4730       | 505.7402         | 1009.4890      | 505.2482         | F    | 2217.9984        | 1109.5028        | 2200.9718       | 1100.9896        | 2199.9878        | <b>1100.4975</b> | 18 |
| 10 | <b>1164.5585</b> | 582.7829         | 1147.5320       | 574.2696         | 1146.5479      | 573.7776         | H    | 2070.9300        | 1035.9686        | 2053.9034       | 1027.4553        | 2052.9194        | 1026.9633        | 17 |
| 11 | 1251.5905        | 626.2989         | 1234.5640       | 617.7856         | 1233.5800      | 617.2936         | S    | 1933.8711        | 967.4392         | 1916.8445       | 958.9259         | 1915.8605        | 958.4339         | 16 |
| 12 | 1380.6331        | <b>690.8202</b>  | 1363.6066       | 682.3069         | 1362.6226      | 681.8149         | E    | <b>1846.8390</b> | 923.9231         | 1829.8125       | 915.4099         | 1828.8285        | 914.9179         | 15 |
| 13 | 1527.6685        | <b>764.3379</b>  | 1510.6420       | 755.8246         | 1509.6580      | 755.3326         | M    | 1717.7964        | 859.4019         | 1700.7699       | 850.8886         | 1699.7859        | 850.3966         | 14 |
| 14 | 1658.7090        | <b>829.8581</b>  | 1641.6825       | <b>821.3449</b>  | 1640.6984      | <b>820.8529</b>  | M    | <b>1570.7610</b> | 785.8842         | 1553.7345       | <b>777.3709</b>  | 1552.7505        | 776.8789         | 13 |
| 15 | 1821.7723        | <b>911.3898</b>  | 1804.7458       | 902.8765         | 1803.7618      | 902.3845         | Y    | <b>1439.7205</b> | 720.3639         | 1422.6940       | 711.8506         | 1421.7100        | <b>711.3586</b>  | 12 |
| 16 | <b>1936.7993</b> | <b>968.9033</b>  | 1919.7727       | 960.3900         | 1918.7887      | 959.8980         | D    | 1276.6572        | 638.8322         | 1259.6307       | <b>630.3190</b>  | <b>1258.6467</b> | <b>629.8270</b>  | 11 |
| 17 | 2051.8262        | 1026.4168        | 2034.7997       | <b>1017.9035</b> | 2033.8157      | <b>1017.4115</b> | N    | <b>1161.6303</b> | 581.3188         | 1144.6037       | 572.8055         | 1143.6197        | 572.3135         | 10 |
| 18 | 2198.8946        | <b>1099.9510</b> | 2181.8681       | <b>1091.4377</b> | 2180.8841      | <b>1090.9457</b> | F    | 1046.6033        | <b>523.8053</b>  | 1029.5768       | 515.2920         | 1028.5928        | <b>514.8000</b>  | 9  |
| 19 | 2299.9423        | <b>1150.4748</b> | 2282.9158       | <b>1141.9615</b> | 2281.9318      | <b>1141.4695</b> | T    | <b>899.5349</b>  | 450.2711         | 882.5084        | 441.7578         | 881.5244         | 441.2658         | 8  |
| 20 | 2413.0264        | <b>1207.0168</b> | 2395.9998       | <b>1198.5036</b> | 2395.0158      | <b>1198.0115</b> | L    | <b>798.4872</b>  | <b>399.7473</b>  | 781.4607        | 391.2340         |                  |                  | 7  |
| 21 | 2512.0948        | <b>1256.5510</b> | 2495.0682       | <b>1248.0378</b> | 2494.0842      | <b>1247.5458</b> | V    | <b>685.4032</b>  | 343.2052         | <b>668.3766</b> | 334.6919         |                  |                  | 6  |
| 22 | 2609.1476        | 1305.0774        | 2592.1210       | 1296.5641        | 2591.1370      | 1296.0721        | P    | <b>586.3348</b>  | 293.6710         | <b>569.3082</b> | 285.1577         |                  |                  | 5  |

|    |           |                  |           |                  |           |                  |   |                 |          |                 |          |  |  |   |
|----|-----------|------------------|-----------|------------------|-----------|------------------|---|-----------------|----------|-----------------|----------|--|--|---|
| 23 | 2708.2160 | <b>1354.6116</b> | 2691.1894 | 1346.0984        | 2690.2054 | 1345.6063        | V | <b>489.2820</b> | 245.1446 | 472.2554        | 236.6314 |  |  | 4 |
| 24 | 2894.2953 | <b>1447.6513</b> | 2877.2687 | <b>1439.1380</b> | 2876.2847 | 1438.6460        | W | <b>390.2136</b> | 195.6104 | <b>373.1870</b> | 187.0972 |  |  | 3 |
| 25 | 2951.3168 | 1476.1620        | 2934.2902 | <b>1467.6487</b> | 2933.3062 | <b>1467.1567</b> | G | 204.1343        | 102.5708 | 187.1077        | 94.0575  |  |  | 2 |
| 26 |           |                  |           |                  |           |                  | K | 147.1128        | 74.0600  | 130.0863        | 65.5468  |  |  | 1 |

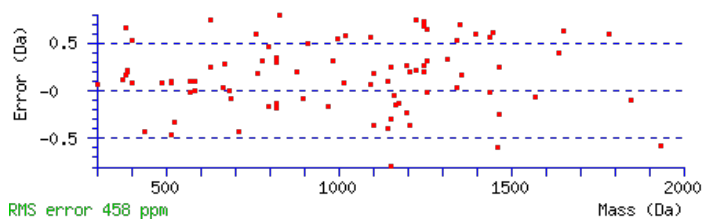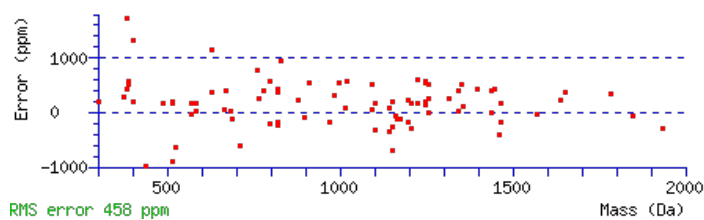

NCBI BLAST search of [WNVNAPPTFHSEMMYDNFTLVPVWGK](#)  
 (Parameters: blastp, nr protein database, expect=20000, no filter, PAM30)  
 Other BLAST [web gateways](#)

All matches to this query

| Score | Mr(calc)  | Delta   | Sequence                                    | Site Analysis                         |
|-------|-----------|---------|---------------------------------------------|---------------------------------------|
| 37.7  | 3096.4150 | 0.0135  | <a href="#">WNVNAPPTFHSEMMYDNFTLVPVWGK</a>  | Deamidated N17, Oxidation M13; 82.01% |
| 30.1  | 3096.4150 | 0.0135  | <a href="#">WNVNAPPTFHSEMMYDNFTLVPVWGK</a>  | Deamidated N17, Oxidation M14; 14.32% |
| 23.4  | 3095.4310 | 0.9975  | <a href="#">WNVNAPPTFHSEMMYDNFTLVPVWGK</a>  |                                       |
| 21.1  | 3096.4150 | 0.0135  | <a href="#">WNVNAPPTFHSEMMYDNFTLVPVWGK</a>  | Deamidated N4, Oxidation M13; 1.77%   |
| 18.3  | 3095.4310 | 0.9975  | <a href="#">WNVNAPPTFHSEMMYDNFTLVPVWGK</a>  |                                       |
| 17.7  | 3096.4150 | 0.0135  | <a href="#">WNVNAPPTFHSEMMYDNFTLVPVWGK</a>  | Deamidated N2, Oxidation M13; 0.81%   |
| 17.4  | 3096.4150 | 0.0135  | <a href="#">WNVNAPPTFHSEMMYDNFTLVPVWGK</a>  | Deamidated N4, Oxidation M14; 0.76%   |
| 13.8  | 3096.4150 | 0.0135  | <a href="#">WNVNAPPTFHSEMMYDNFTLVPVWGK</a>  | Deamidated N2, Oxidation M14; 0.33%   |
| 8.5   | 3095.4366 | 0.9918  | <a href="#">QIGPDARPRNQSSTYTATSWLDMEQSR</a> |                                       |
| 5.6   | 3096.4294 | -0.0009 | <a href="#">VAQVRACLSTCPPEYEQFASGDRHR</a>   |                                       |

Mascot: <http://www.matrixscience.com/>

# MASCOT SCIENCE Mascot Search Results

## Peptide View

MS/MS Fragmentation of **VLSNNSDANLELINTWVAK**

Found in **B4E1F0** in **con\_Xuniprot\_HUMAN3**, B4E1F0\_HUMAN Plasma protease C1 inhibitor OS=Homo sapiens GN=SERPING1 PE=2 SV=1

Match to Query 13693: 2101.075488 from(1051.545020,2+) intensity(37412.4961) rtinseconds(3166) scans(8074) index(12223)

Title: 111019\_Est\_ISCardio\_NMI\_YS\_G\_8Spectrum7057\_scans\_8074

Data file C:\\mascot\\20140703\_Tmgf\_1D\\CSV\_UseAnalysis\\MasterCSV\\All\_Glyco\\mgf\\ptm\\UC18ERLIC\_PTM\_35D.mgf

Click mouse within plot area to zoom in by factor of two about that point

Or, to Da

Label all possible matches Label matches used for scoring

Show Y-axis

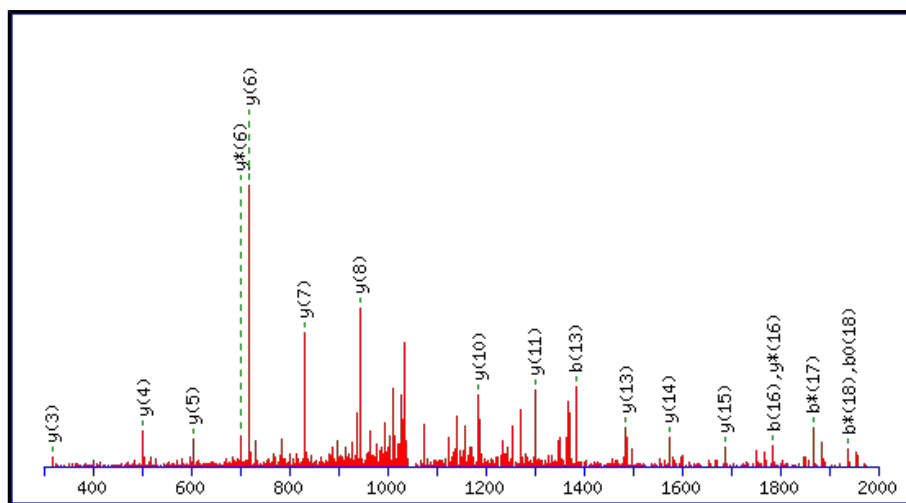

Monoisotopic mass of neutral peptide Mr(calc): 2101.0691

Fixed modifications: Carbamidomethyl (C) (apply to specified residues or termini only)

Variable modifications:

N4 : Deamidated (NQ)

Ions Score: 112 Expect: 1.5e-009

Matches : 18/198 fragment ions using 17 most intense peaks ([help](#))

| #  | b         | b <sup>++</sup> | b*        | b <sup>*++</sup> | b <sup>0</sup> | b <sup>0++</sup> | Seq. | y         | y <sup>++</sup> | y*        | y <sup>*++</sup> | y <sup>0</sup> | y <sup>0++</sup> | #  |
|----|-----------|-----------------|-----------|------------------|----------------|------------------|------|-----------|-----------------|-----------|------------------|----------------|------------------|----|
| 1  | 100.0757  | 50.5415         |           |                  |                |                  | V    |           |                 |           |                  |                |                  | 19 |
| 2  | 213.1598  | 107.0835        |           |                  |                |                  | L    | 2003.0080 | 1002.0076       | 1985.9815 | 993.4944         | 1984.9974      | 993.0024         | 18 |
| 3  | 300.1918  | 150.5995        |           |                  | 282.1812       | 141.5942         | S    | 1889.9239 | 945.4656        | 1872.8974 | 936.9523         | 1871.9134      | 936.4603         | 17 |
| 4  | 415.2187  | 208.1130        | 398.1922  | 199.5997         | 397.2082       | 199.1077         | N    | 1802.8919 | 901.9496        | 1785.8654 | 893.4363         | 1784.8814      | 892.9443         | 16 |
| 5  | 529.2617  | 265.1345        | 512.2351  | 256.6212         | 511.2511       | 256.1292         | N    | 1687.8650 | 844.4361        | 1670.8384 | 835.9229         | 1669.8544      | 835.4308         | 15 |
| 6  | 616.2937  | 308.6505        | 599.2671  | 300.1372         | 598.2831       | 299.6452         | S    | 1573.8220 | 787.4147        | 1556.7955 | 778.9014         | 1555.8115      | 778.4094         | 14 |
| 7  | 731.3206  | 366.1639        | 714.2941  | 357.6507         | 713.3101       | 357.1587         | D    | 1486.7900 | 743.8986        | 1469.7635 | 735.3854         | 1468.7795      | 734.8934         | 13 |
| 8  | 802.3577  | 401.6825        | 785.3312  | 393.1692         | 784.3472       | 392.6772         | A    | 1371.7631 | 686.3852        | 1354.7365 | 677.8719         | 1353.7525      | 677.3799         | 12 |
| 9  | 916.4007  | 458.7040        | 899.3741  | 450.1907         | 898.3901       | 449.6987         | N    | 1300.7260 | 650.8666        | 1283.6994 | 642.3533         | 1282.7154      | 641.8613         | 11 |
| 10 | 1029.4847 | 515.2460        | 1012.4582 | 506.7327         | 1011.4742      | 506.2407         | L    | 1186.6830 | 593.8452        | 1169.6565 | 585.3319         | 1168.6725      | 584.8399         | 10 |
| 11 | 1158.5273 | 579.7673        | 1141.5008 | 571.2540         | 1140.5168      | 570.7620         | E    | 1073.5990 | 537.3031        | 1056.5724 | 528.7898         | 1055.5884      | 528.2978         | 9  |
| 12 | 1271.6114 | 636.3093        | 1254.5848 | 627.7961         | 1253.6008      | 627.3040         | L    | 944.5564  | 472.7818        | 927.5298  | 464.2686         | 926.5458       | 463.7765         | 8  |
| 13 | 1384.6954 | 692.8514        | 1367.6689 | 684.3381         | 1366.6849      | 683.8461         | I    | 831.4723  | 416.2398        | 814.4458  | 407.7265         | 813.4617       | 407.2345         | 7  |
| 14 | 1498.7384 | 749.8728        | 1481.7118 | 741.3596         | 1480.7278      | 740.8675         | N    | 718.3883  | 359.6978        | 701.3617  | 351.1845         | 700.3777       | 350.6925         | 6  |
| 15 | 1599.7861 | 800.3967        | 1582.7595 | 791.8834         | 1581.7755      | 791.3914         | T    | 604.3453  | 302.6763        | 587.3188  | 294.1630         | 586.3348       | 293.6710         | 5  |
| 16 | 1785.8654 | 893.4363        | 1768.8388 | 884.9230         | 1767.8548      | 884.4310         | W    | 503.2976  | 252.1525        | 486.2711  | 243.6392         |                |                  | 4  |
| 17 | 1884.9338 | 942.9705        | 1867.9072 | 934.4573         | 1866.9232      | 933.9652         | V    | 317.2183  | 159.1128        | 300.1918  | 150.5995         |                |                  | 3  |
| 18 | 1955.9709 | 978.4891        | 1938.9443 | 969.9758         | 1937.9603      | 969.4838         | A    | 218.1499  | 109.5786        | 201.1234  | 101.0653         |                |                  | 2  |
| 19 |           |                 |           |                  |                |                  | K    | 147.1128  | 74.0600         | 130.0863  | 65.5468          |                |                  | 1  |

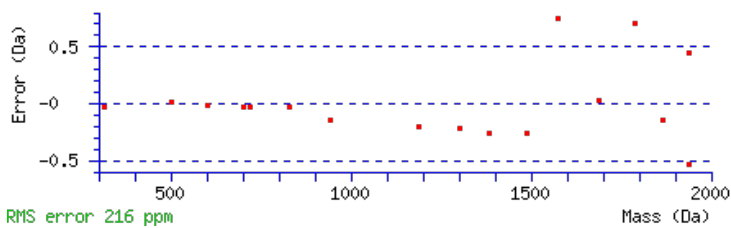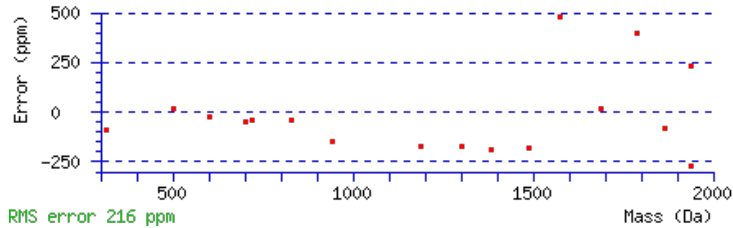

NCBI **BLAST** search of [VLSNNSDANLELINTWVAK](#)  
 (Parameters: blastp, nr protein database, expect=20000, no filter, PAM30)  
 Other BLAST [web gateways](#)

**All matches to this query**

| Score | Mr(calc)  | Delta   | Sequence                             | Site Analysis        |
|-------|-----------|---------|--------------------------------------|----------------------|
| 112.4 | 2101.0691 | 0.0064  | <a href="#">VLSNNSDANLELINTWVAK</a>  | Deamidated N4 98.86% |
| 92.8  | 2101.0691 | 0.0064  | <a href="#">VLSNNSDANLELINTWVAK</a>  | Deamidated N5 1.09%  |
| 79.1  | 2101.0691 | 0.0064  | <a href="#">VLSNNSDANLELINTWVAK</a>  | Deamidated N9 0.05%  |
| 55.0  | 2101.0691 | 0.0064  | <a href="#">VLSNNSDANLELINTWVAK</a>  | Deamidated N14 0.00% |
| 8.9   | 2100.0626 | 1.0129  | <a href="#">TALELSWNIIPSEEELEK</a>   |                      |
| 6.0   | 2100.0811 | 0.9944  | <a href="#">EATGTRGELNLLQSAQADVK</a> |                      |
| 5.4   | 2101.0837 | -0.0082 | <a href="#">VLQLMNLTD SRLAQAGNEK</a> |                      |
| 5.4   | 2101.0837 | -0.0082 | <a href="#">VLQLMNLTD SRLAQAGNEK</a> |                      |
| 4.5   | 2101.0651 | 0.0104  | <a href="#">EATGTRGELNLLQSAQADVK</a> |                      |
| 4.3   | 2101.0691 | 0.0064  | <a href="#">EEIGNTGEPILAFNDKGVAK</a> |                      |

Mascot: <http://www.matrixscience.com/>

# MATRIX SCIENCE Mascot Search Results

## Peptide View

MS/MS Fragmentation of **VLSNNSDANLELINTWVAKNTNNKISR**

Found in **B4E1F0** in **con\_Xuniprot\_HUMAN3**, B4E1F0\_HUMAN Plasma protease C1 inhibitor OS=Homo sapiens GN=SERPING1 PE=2 SV=1

Match to Query 27283: 3028.572162 from(1010.531330,3+) intensity(294941.0625) rtinseconds(1938) scans(4928) index(25471)

Title: 111019\_Est\_ML\_YS\_G\_07Spectrum4204\_scans\_\_4928

Data file C:\mascot\20140703\_Tmgf\_1D\CSV\_UseAnalysis\MasterCSV\All\_Glyco\mgf\ptm\UC18ERLIC\_PTM\_35D.mgf

Click mouse within plot area to zoom in by factor of two about that point

Or, to Da

Label all possible matches Label matches used for scoring

Show Y-axis

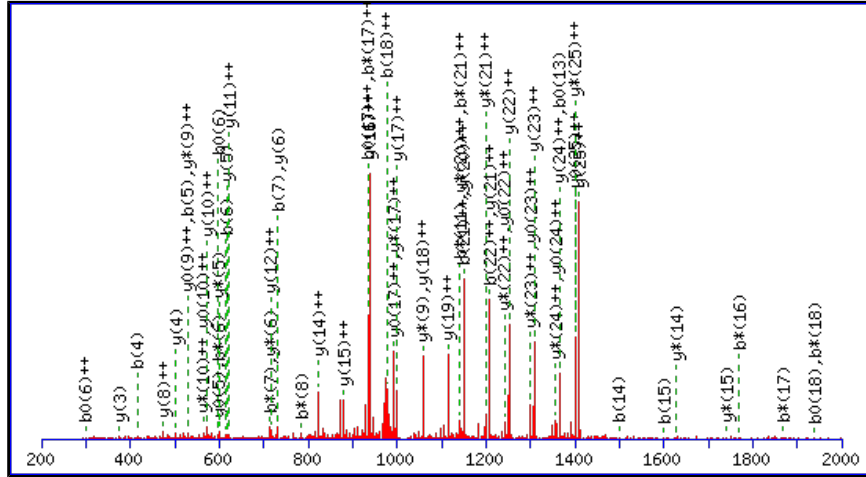

Monoisotopic mass of neutral peptide Mr(calc): 3028.5577

Fixed modifications: Carbamidomethyl (C) (apply to specified residues or termini only)

Variable modifications:

N4 : Deamidated (NQ)

Ions Score: 76 Expect: 3.9e-006

Matches : 65/300 fragment ions using 103 most intense peaks ([help](#))

| #  | b         | b <sup>++</sup> | b <sup>*</sup> | b <sup>*++</sup> | b <sup>0</sup> | b <sup>0++</sup> | Seq. | y         | y <sup>++</sup> | y <sup>*</sup> | y <sup>*++</sup> | y <sup>0</sup> | y <sup>0++</sup> | #  |
|----|-----------|-----------------|----------------|------------------|----------------|------------------|------|-----------|-----------------|----------------|------------------|----------------|------------------|----|
| 1  | 100.0757  | 50.5415         |                |                  |                |                  | V    |           |                 |                |                  |                |                  | 27 |
| 2  | 213.1598  | 107.0835        |                |                  |                |                  | L    | 2930.4966 | 1465.7520       | 2913.4701      | 1457.2387        | 2912.4861      | 1456.7467        | 26 |
| 3  | 300.1918  | 150.5995        |                |                  | 282.1812       | 141.5942         | S    | 2817.4126 | 1409.2099       | 2800.3860      | 1400.6966        | 2799.4020      | 1400.2046        | 25 |
| 4  | 415.2187  | 208.1130        | 398.1922       | 199.5997         | 397.2082       | 199.1077         | N    | 2730.3805 | 1365.6939       | 2713.3540      | 1357.1806        | 2712.3700      | 1356.6886        | 24 |
| 5  | 529.2617  | 265.1345        | 512.2351       | 256.6212         | 511.2511       | 256.1292         | N    | 2615.3536 | 1308.1804       | 2598.3271      | 1299.6672        | 2597.3430      | 1299.1752        | 23 |
| 6  | 616.2937  | 308.6505        | 599.2671       | 300.1372         | 598.2831       | 299.6452         | S    | 2501.3107 | 1251.1590       | 2484.2841      | 1242.6457        | 2483.3001      | 1242.1537        | 22 |
| 7  | 731.3206  | 366.1639        | 714.2941       | 357.6507         | 713.3101       | 357.1587         | D    | 2414.2786 | 1207.6430       | 2397.2521      | 1199.1297        | 2396.2681      | 1198.6377        | 21 |
| 8  | 802.3577  | 401.6825        | 785.3312       | 393.1692         | 784.3472       | 392.6772         | A    | 2299.2517 | 1150.1295       | 2282.2252      | 1141.6162        | 2281.2411      | 1141.1242        | 20 |
| 9  | 916.4007  | 458.7040        | 899.3741       | 450.1907         | 898.3901       | 449.6987         | N    | 2228.2146 | 1114.6109       | 2211.1880      | 1106.0977        | 2210.2040      | 1105.6056        | 19 |
| 10 | 1029.4847 | 515.2460        | 1012.4582      | 506.7327         | 1011.4742      | 506.2407         | L    | 2114.1717 | 1057.5895       | 2097.1451      | 1049.0762        | 2096.1611      | 1048.5842        | 18 |
| 11 | 1158.5273 | 579.7673        | 1141.5008      | 571.2540         | 1140.5168      | 570.7620         | E    | 2001.0876 | 1001.0474       | 1984.0610      | 992.5342         | 1983.0770      | 992.0422         | 17 |
| 12 | 1271.6114 | 636.3093        | 1254.5848      | 627.7961         | 1253.6008      | 627.3040         | L    | 1872.0450 | 936.5261        | 1855.0185      | 928.0129         | 1854.0344      | 927.5209         | 16 |
| 13 | 1384.6954 | 692.8514        | 1367.6689      | 684.3381         | 1366.6849      | 683.8461         | I    | 1758.9609 | 879.9841        | 1741.9344      | 871.4708         | 1740.9504      | 870.9788         | 15 |
| 14 | 1498.7384 | 749.8728        | 1481.7118      | 741.3596         | 1480.7278      | 740.8675         | N    | 1645.8769 | 823.4421        | 1628.8503      | 814.9288         | 1627.8663      | 814.4368         | 14 |
| 15 | 1599.7861 | 800.3967        | 1582.7595      | 791.8834         | 1581.7755      | 791.3914         | T    | 1531.8340 | 766.4206        | 1514.8074      | 757.9073         | 1513.8234      | 757.4153         | 13 |
| 16 | 1785.8654 | 893.4363        | 1768.8388      | 884.9230         | 1767.8548      | 884.4310         | W    | 1430.7863 | 715.8968        | 1413.7597      | 707.3835         | 1412.7757      | 706.8915         | 12 |
| 17 | 1884.9338 | 942.9705        | 1867.9072      | 934.4573         | 1866.9232      | 933.9652         | V    | 1244.7070 | 622.8571        | 1227.6804      | 614.3438         | 1226.6964      | 613.8518         | 11 |
| 18 | 1955.9709 | 978.4891        | 1938.9443      | 969.9758         | 1937.9603      | 969.4838         | A    | 1145.6385 | 573.3229        | 1128.6120      | 564.8096         | 1127.6280      | 564.3176         | 10 |
| 19 | 2084.0659 | 1042.5366       | 2067.0393      | 1034.0233        | 2066.0553      | 1033.5313        | K    | 1074.6014 | 537.8044        | 1057.5749      | 529.2911         | 1056.5909      | 528.7991         | 9  |
| 20 | 2198.1088 | 1099.5580       | 2181.0822      | 1091.0448        | 2180.0982      | 1090.5527        | N    | 946.5065  | 473.7569        | 929.4799       | 465.2436         | 928.4959       | 464.7516         | 8  |
| 21 | 2299.1565 | 1150.0819       | 2282.1299      | 1141.5686        | 2281.1459      | 1141.0766        | T    | 832.4635  | 416.7354        | 815.4370       | 408.2221         | 814.4530       | 407.7301         | 7  |
| 22 | 2413.1994 | 1207.1033       | 2396.1728      | 1198.5901        | 2395.1888      | 1198.0981        | N    | 731.4159  | 366.2116        | 714.3893       | 357.6983         | 713.4053       | 357.2063         | 6  |
| 23 | 2527.2423 | 1264.1248       | 2510.2158      | 1255.6115        | 2509.2318      | 1255.1195        | N    | 617.3729  | 309.1901        | 600.3464       | 300.6768         | 599.3624       | 300.1848         | 5  |



|    |           |           |           |           |           |           |          |                 |          |          |          |          |          |          |
|----|-----------|-----------|-----------|-----------|-----------|-----------|----------|-----------------|----------|----------|----------|----------|----------|----------|
| 24 | 2655.3373 | 1328.1723 | 2638.3107 | 1319.6590 | 2637.3267 | 1319.1670 | <b>K</b> | <b>503.3300</b> | 252.1686 | 486.3035 | 243.6554 | 485.3194 | 243.1634 | <b>4</b> |
| 25 | 2768.4213 | 1384.7143 | 2751.3948 | 1376.2010 | 2750.4108 | 1375.7090 | <b>I</b> | <b>375.2350</b> | 188.1212 | 358.2085 | 179.6079 | 357.2245 | 179.1159 | <b>3</b> |
| 26 | 2855.4534 | 1428.2303 | 2838.4268 | 1419.7171 | 2837.4428 | 1419.2250 | <b>S</b> | 262.1510        | 131.5791 | 245.1244 | 123.0659 | 244.1404 | 122.5738 | <b>2</b> |
| 27 |           |           |           |           |           |           | <b>R</b> | 175.1190        | 88.0631  | 158.0924 | 79.5498  |          |          | <b>1</b> |

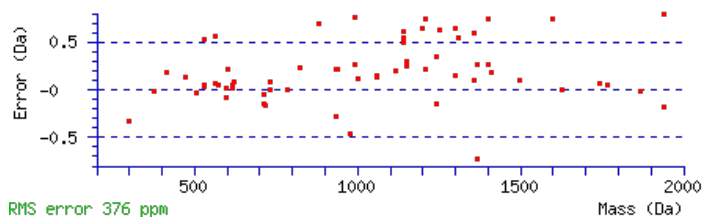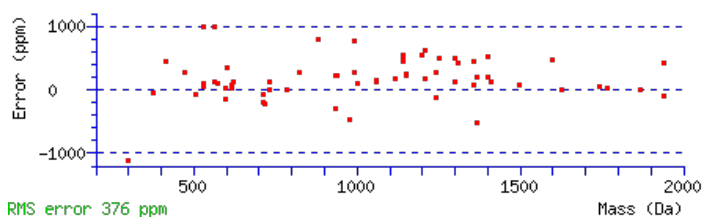

NCBI **BLAST** search of [VLSNNSDANLELINTWVAKNTNKKISR](#)

(Parameters: blastp, nr protein database, expect=20000, no filter, PAM30)

Other BLAST [web gateways](#)

**All matches to this query**

| Score | Mr(calc)  | Delta  | Sequence                                    | Site Analysis         |
|-------|-----------|--------|---------------------------------------------|-----------------------|
| 76.4  | 3028.5577 | 0.0145 | <a href="#">VLSNNSDANLELINTWVAKNTNKKISR</a> | Deamidated N4 27.59%  |
| 75.3  | 3028.5577 | 0.0145 | <a href="#">VLSNNSDANLELINTWVAKNTNKKISR</a> | Deamidated N5 21.52%  |
| 75.2  | 3028.5577 | 0.0145 | <a href="#">VLSNNSDANLELINTWVAKNTNKKISR</a> | Deamidated N20 20.84% |
| 74.2  | 3028.5577 | 0.0145 | <a href="#">VLSNNSDANLELINTWVAKNTNKKISR</a> | Deamidated N22 16.47% |
| 70.3  | 3028.5577 | 0.0145 | <a href="#">VLSNNSDANLELINTWVAKNTNKKISR</a> | Deamidated N14 6.71%  |
| 68.7  | 3028.5577 | 0.0145 | <a href="#">VLSNNSDANLELINTWVAKNTNKKISR</a> | Deamidated N23 4.62%  |
| 65.5  | 3028.5577 | 0.0145 | <a href="#">VLSNNSDANLELINTWVAKNTNKKISR</a> | Deamidated N9 2.25%   |
| 60.3  | 3027.5737 | 0.9985 | <a href="#">VLSNNSDANLELINTWVAKNTNKKISR</a> |                       |
| 5.3   | 3027.5793 | 0.9928 | <a href="#">GPPVLSFFLSLGLTSFAPRPLWADRHM</a> |                       |
| 3.3   | 3026.5800 | 1.9921 | <a href="#">RSPPSWFVSPVRLPTGTNQPLECLR</a>   |                       |

Mascot: <http://www.matrixscience.com/>

# MASCOT SCIENCE Mascot Search Results

## Peptide View

MS/MS Fragmentation of **VGQLQLSHNLSLVILVPQNLK**

Found in **B4E1F0** in **con\_Xuniprot\_HUMAN3**, B4E1F0\_HUMAN Plasma protease C1 inhibitor OS=Homo sapiens GN=SERPING1 PE=2 SV=1

Match to Query 15170: 2313.351028 from(1157.682790,2+) intensity(124402.6172) rtinseconds(2424) scans(6061) index(9146)

Title: 111019\_Est\_ISCardio\_NMI\_YS\_G\_4Spectrum5234\_scans\_\_6061

Data file C:\mascot\20140703\_Tmgf\_1D\CSV\_UseAnalysis\MasterCSV\All\_Glyco\mgf\ptm\UC18ERLIC\_PTM\_35D.mgf

Click mouse within plot area to zoom in by factor of two about that point

Or, to Da

Label all possible matches Label matches used for scoring

Show Y-axis

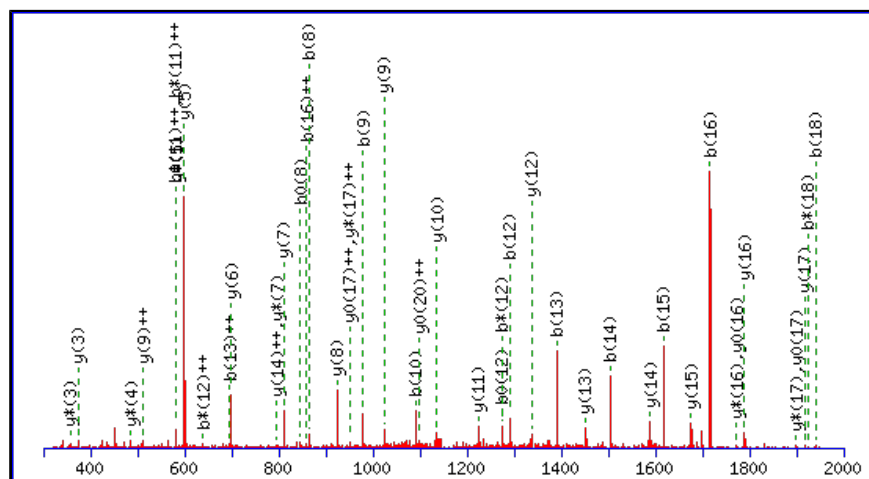

Monoisotopic mass of neutral peptide Mr(calc): 2313.3420

Fixed modifications: Carbamidomethyl (C) (apply to specified residues or termini only)

Variable modifications:

N9 : Deamidated (NQ)

Ions Score: 71 Expect: 1.2e-006

Matches : 45/204 fragment ions using 85 most intense peaks ([help](#))

| #  | b         | b <sup>++</sup> | b <sup>*</sup> | b <sup>*++</sup> | b <sup>0</sup> | b <sup>0++</sup> | Seq. | y         | y <sup>++</sup> | y <sup>*</sup> | y <sup>*++</sup> | y <sup>0</sup> | y <sup>0++</sup> | #  |
|----|-----------|-----------------|----------------|------------------|----------------|------------------|------|-----------|-----------------|----------------|------------------|----------------|------------------|----|
| 1  | 100.0757  | 50.5415         |                |                  |                |                  | V    |           |                 |                |                  |                |                  | 21 |
| 2  | 157.0972  | 79.0522         |                |                  |                |                  | G    | 2215.2809 | 1108.1441       | 2198.2543      | 1099.6308        | 2197.2703      | 1099.1388        | 20 |
| 3  | 285.1557  | 143.0815        | 268.1292       | 134.5682         |                |                  | Q    | 2158.2594 | 1079.6333       | 2141.2329      | 1071.1201        | 2140.2489      | 1070.6281        | 19 |
| 4  | 398.2398  | 199.6235        | 381.2132       | 191.1103         |                |                  | L    | 2030.2008 | 1015.6041       | 2013.1743      | 1007.0908        | 2012.1903      | 1006.5988        | 18 |
| 5  | 526.2984  | 263.6528        | 509.2718       | 255.1396         |                |                  | Q    | 1917.1168 | 959.0620        | 1900.0902      | 950.5488         | 1899.1062      | 950.0567         | 17 |
| 6  | 639.3824  | 320.1949        | 622.3559       | 311.6816         |                |                  | L    | 1789.0582 | 895.0327        | 1772.0316      | 886.5195         | 1771.0476      | 886.0275         | 16 |
| 7  | 726.4145  | 363.7109        | 709.3879       | 355.1976         | 708.4039       | 354.7056         | S    | 1675.9741 | 838.4907        | 1658.9476      | 829.9774         | 1657.9636      | 829.4854         | 15 |
| 8  | 863.4734  | 432.2403        | 846.4468       | 423.7271         | 845.4628       | 423.2350         | H    | 1588.9421 | 794.9747        | 1571.9156      | 786.4614         | 1570.9315      | 785.9694         | 14 |
| 9  | 978.5003  | 489.7538        | 961.4738       | 481.2405         | 960.4898       | 480.7485         | N    | 1451.8832 | 726.4452        | 1434.8566      | 717.9320         | 1433.8726      | 717.4400         | 13 |
| 10 | 1091.5844 | 546.2958        | 1074.5578      | 537.7826         | 1073.5738      | 537.2905         | L    | 1336.8562 | 668.9318        | 1319.8297      | 660.4185         | 1318.8457      | 659.9265         | 12 |
| 11 | 1178.6164 | 589.8118        | 1161.5899      | 581.2986         | 1160.6058      | 580.8066         | S    | 1223.7722 | 612.3897        | 1206.7456      | 603.8765         | 1205.7616      | 603.3844         | 11 |
| 12 | 1291.7005 | 646.3539        | 1274.6739      | 637.8406         | 1273.6899      | 637.3486         | L    | 1136.7402 | 568.8737        | 1119.7136      | 560.3604         |                |                  | 10 |
| 13 | 1390.7689 | 695.8881        | 1373.7423      | 687.3748         | 1372.7583      | 686.8828         | V    | 1023.6561 | 512.3317        | 1006.6295      | 503.8184         |                |                  | 9  |
| 14 | 1503.8530 | 752.4301        | 1486.8264      | 743.9168         | 1485.8424      | 743.4248         | I    | 924.5877  | 462.7975        | 907.5611       | 454.2842         |                |                  | 8  |
| 15 | 1616.9370 | 808.9721        | 1599.9105      | 800.4589         | 1598.9265      | 799.9669         | L    | 811.5036  | 406.2554        | 794.4771       | 397.7422         |                |                  | 7  |
| 16 | 1716.0054 | 858.5064        | 1698.9789      | 849.9931         | 1697.9949      | 849.5011         | V    | 698.4196  | 349.7134        | 681.3930       | 341.2001         |                |                  | 6  |
| 17 | 1813.0582 | 907.0327        | 1796.0316      | 898.5195         | 1795.0476      | 898.0275         | P    | 599.3511  | 300.1792        | 582.3246       | 291.6659         |                |                  | 5  |
| 18 | 1941.1168 | 971.0620        | 1924.0902      | 962.5488         | 1923.1062      | 962.0567         | Q    | 502.2984  | 251.6528        | 485.2718       | 243.1395         |                |                  | 4  |
| 19 | 2055.1597 | 1028.0835       | 2038.1332      | 1019.5702        | 2037.1491      | 1019.0782        | N    | 374.2398  | 187.6235        | 357.2132       | 179.1103         |                |                  | 3  |
| 20 | 2168.2438 | 1084.6255       | 2151.2172      | 1076.1122        | 2150.2332      | 1075.6202        | L    | 260.1969  | 130.6021        | 243.1703       | 122.0888         |                |                  | 2  |
| 21 |           |                 |                |                  |                |                  | K    | 147.1128  | 74.0600         | 130.0863       | 65.5468          |                |                  | 1  |

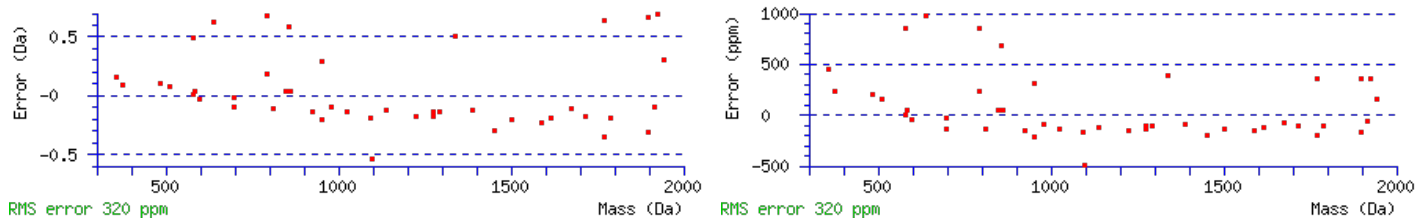

NCBI BLAST search of [VGQLQLSHNLSLVILVPQNLK](#)  
 (Parameters: blastp, nr protein database, expect=20000, no filter, PAM30)  
 Other BLAST [web gateways](#)

All matches to this query

| Score | Mr(calc)  | Delta  | Sequence                              | Site Analysis        |
|-------|-----------|--------|---------------------------------------|----------------------|
| 71.1  | 2313.3420 | 0.0090 | <a href="#">VGQLQLSHNLSLVILVPQNLK</a> | Deamidated N9 93.34% |
| 57.4  | 2313.3420 | 0.0090 | <a href="#">VGQLQLSHNLSLVILVPQNLK</a> | Deamidated Q5 4.03%  |
| 54.0  | 2313.3420 | 0.0090 | <a href="#">VGQLQLSHNLSLVILVPQNLK</a> | Deamidated Q3 1.82%  |
| 48.9  | 2313.3420 | 0.0090 | <a href="#">VGQLQLSHNLSLVILVPQNLK</a> | Deamidated Q18 0.57% |
| 45.4  | 2313.3420 | 0.0090 | <a href="#">VGQLQLSHNLSLVILVPQNLK</a> | Deamidated N19 0.25% |
| 41.3  | 2312.3580 | 0.9930 | <a href="#">VGQLQLSHNLSLVILVPQNLK</a> |                      |

Mascot: <http://www.matrixscience.com/>

# MASCOT SCIENCE Mascot Search Results

## Peptide View

MS/MS Fragmentation of **VLSNNSDANLELINTWVAKNTNNK**

Found in **B4E1F0** in **con\_Xuniprot\_HUMAN3**, B4E1F0\_HUMAN Plasma protease C1 inhibitor OS=Homo sapiens GN=SERPING1 PE=2 SV=1

Match to Query 22468: 2672.351022 from(891.790950,3+) intensity(156419.8281) rtinseconds(1942) scans(4988) index(9640)

Title: 111019\_Est\_ISCardio\_NMI\_YS\_G\_5Spectrum4280\_scans\_\_4988

Data file C:\mascot\20140703\_Tmgf\_1D\CSV\_UseAnalysis\MasterCSV\All\_Glyco\mgf\ptm\UC18ERLIC\_PTM\_35D.mgf

Click mouse within plot area to zoom in by factor of two about that point

Or, to Da

Label all possible matches Label matches used for scoring

Show Y-axis

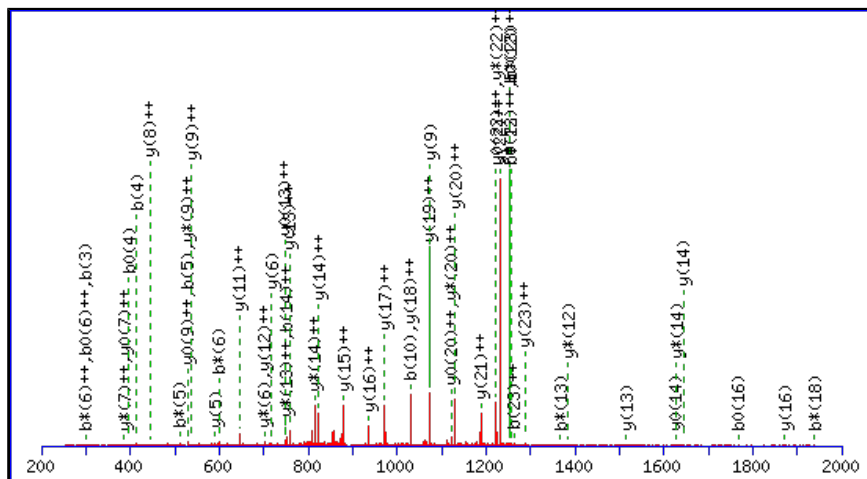

Monoisotopic mass of neutral peptide Mr(calc): 2672.3405

Fixed modifications: Carbamidomethyl (C) (apply to specified residues or termini only)

Variable modifications:

N4 : Deamidated (NQ)

Ions Score: 66 Expect: 5.9e-005

Matches : 54/260 fragment ions using 102 most intense peaks ([help](#))

| #  | b         | b <sup>++</sup> | b <sup>*</sup> | b <sup>*++</sup> | b <sup>0</sup> | b <sup>0++</sup> | Seq. | y         | y <sup>++</sup> | y <sup>*</sup> | y <sup>*++</sup> | y <sup>0</sup> | y <sup>0++</sup> | #  |
|----|-----------|-----------------|----------------|------------------|----------------|------------------|------|-----------|-----------------|----------------|------------------|----------------|------------------|----|
| 1  | 100.0757  | 50.5415         |                |                  |                |                  | V    |           |                 |                |                  |                |                  | 24 |
| 2  | 213.1598  | 107.0835        |                |                  |                |                  | L    | 2574.2794 | 1287.6434       | 2557.2529      | 1279.1301        | 2556.2689      | 1278.6381        | 23 |
| 3  | 300.1918  | 150.5995        |                |                  | 282.1812       | 141.5942         | S    | 2461.1954 | 1231.1013       | 2444.1688      | 1222.5880        | 2443.1848      | 1222.0960        | 22 |
| 4  | 415.2187  | 208.1130        | 398.1922       | 199.5997         | 397.2082       | 199.1077         | N    | 2374.1633 | 1187.5853       | 2357.1368      | 1179.0720        | 2356.1528      | 1178.5800        | 21 |
| 5  | 529.2617  | 265.1345        | 512.2351       | 256.6212         | 511.2511       | 256.1292         | N    | 2259.1364 | 1130.0718       | 2242.1098      | 1121.5586        | 2241.1258      | 1121.0666        | 20 |
| 6  | 616.2937  | 308.6505        | 599.2671       | 300.1372         | 598.2831       | 299.6452         | S    | 2145.0935 | 1073.0504       | 2128.0669      | 1064.5371        | 2127.0829      | 1064.0451        | 19 |
| 7  | 731.3206  | 366.1639        | 714.2941       | 357.6507         | 713.3101       | 357.1587         | D    | 2058.0614 | 1029.5344       | 2041.0349      | 1021.0211        | 2040.0509      | 1020.5291        | 18 |
| 8  | 802.3577  | 401.6825        | 785.3312       | 393.1692         | 784.3472       | 392.6772         | A    | 1943.0345 | 972.0209        | 1926.0080      | 963.5076         | 1925.0239      | 963.0156         | 17 |
| 9  | 916.4007  | 458.7040        | 899.3741       | 450.1907         | 898.3901       | 449.6987         | N    | 1871.9974 | 936.5023        | 1854.9708      | 927.9891         | 1853.9868      | 927.4970         | 16 |
| 10 | 1029.4847 | 515.2460        | 1012.4582      | 506.7327         | 1011.4742      | 506.2407         | L    | 1757.9545 | 879.4809        | 1740.9279      | 870.9676         | 1739.9439      | 870.4756         | 15 |
| 11 | 1158.5273 | 579.7673        | 1141.5008      | 571.2540         | 1140.5168      | 570.7620         | E    | 1644.8704 | 822.9388        | 1627.8438      | 814.4256         | 1626.8598      | 813.9336         | 14 |
| 12 | 1271.6114 | 636.3093        | 1254.5848      | 627.7961         | 1253.6008      | 627.3040         | L    | 1515.8278 | 758.4175        | 1498.8013      | 749.9043         | 1497.8172      | 749.4123         | 13 |
| 13 | 1384.6954 | 692.8514        | 1367.6689      | 684.3381         | 1366.6849      | 683.8461         | I    | 1402.7437 | 701.8755        | 1385.7172      | 693.3622         | 1384.7332      | 692.8702         | 12 |
| 14 | 1498.7384 | 749.8728        | 1481.7118      | 741.3596         | 1480.7278      | 740.8675         | N    | 1289.6597 | 645.3335        | 1272.6331      | 636.8202         | 1271.6491      | 636.3282         | 11 |
| 15 | 1599.7861 | 800.3967        | 1582.7595      | 791.8834         | 1581.7755      | 791.3914         | T    | 1175.6167 | 588.3120        | 1158.5902      | 579.7987         | 1157.6062      | 579.3067         | 10 |
| 16 | 1785.8654 | 893.4363        | 1768.8388      | 884.9230         | 1767.8548      | 884.4310         | W    | 1074.5691 | 537.7882        | 1057.5425      | 529.2749         | 1056.5585      | 528.7829         | 9  |
| 17 | 1884.9338 | 942.9705        | 1867.9072      | 934.4573         | 1866.9232      | 933.9652         | V    | 888.4898  | 444.7485        | 871.4632       | 436.2352         | 870.4792       | 435.7432         | 8  |
| 18 | 1955.9709 | 978.4891        | 1938.9443      | 969.9758         | 1937.9603      | 969.4838         | A    | 789.4213  | 395.2143        | 772.3948       | 386.7010         | 771.4108       | 386.2090         | 7  |
| 19 | 2084.0659 | 1042.5366       | 2067.0393      | 1034.0233        | 2066.0553      | 1033.5313        | K    | 718.3842  | 359.6958        | 701.3577       | 351.1825         | 700.3737       | 350.6905         | 6  |
| 20 | 2198.1088 | 1099.5580       | 2181.0822      | 1091.0448        | 2180.0982      | 1090.5527        | N    | 590.2893  | 295.6483        | 573.2627       | 287.1350         | 572.2787       | 286.6430         | 5  |
| 21 | 2299.1565 | 1150.0819       | 2282.1299      | 1141.5686        | 2281.1459      | 1141.0766        | T    | 476.2463  | 238.6268        | 459.2198       | 230.1135         | 458.2358       | 229.6215         | 4  |
| 22 | 2413.1994 | 1207.1033       | 2396.1728      | 1198.5901        | 2395.1888      | 1198.0981        | N    | 375.1987  | 188.1030        | 358.1721       | 179.5897         |                |                  | 3  |
| 23 | 2527.2423 | 1264.1248       | 2510.2158      | 1255.6115        | 2509.2318      | 1255.1195        | N    | 261.1557  | 131.0815        | 244.1292       | 122.5682         |                |                  | 2  |

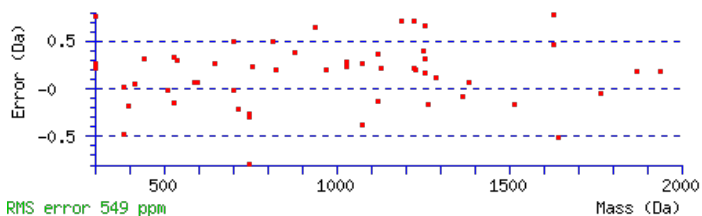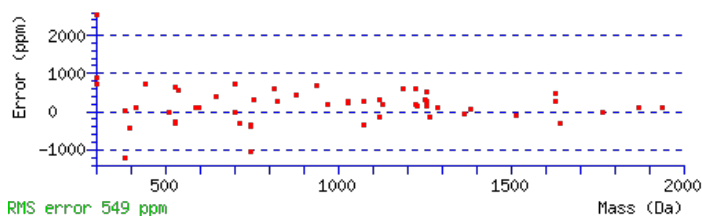

NCBI BLAST search of [VLSNNSDANLELINTWVAKNTNPK](#)  
 (Parameters: blastp, nr protein database, expect=20000, no filter, PAM30)  
 Other BLAST [web gateways](#)

All matches to this query

| Score | Mr(calc)  | Delta   | Sequence                                 | Site Analysis         |
|-------|-----------|---------|------------------------------------------|-----------------------|
| 66.3  | 2672.3405 | 0.0105  | <a href="#">VLSNNSDANLELINTWVAKNTNPK</a> | Deamidated N4 65.07%  |
| 59.2  | 2672.3405 | 0.0105  | <a href="#">VLSNNSDANLELINTWVAKNTNPK</a> | Deamidated N14 12.69% |
| 59.1  | 2672.3405 | 0.0105  | <a href="#">VLSNNSDANLELINTWVAKNTNPK</a> | Deamidated N9 12.48%  |
| 57.6  | 2672.3405 | 0.0105  | <a href="#">VLSNNSDANLELINTWVAKNTNPK</a> | Deamidated N5 8.88%   |
| 53.0  | 2671.3565 | 0.9945  | <a href="#">VLSNNSDANLELINTWVAKNTNPK</a> |                       |
| 42.8  | 2672.3405 | 0.0105  | <a href="#">VLSNNSDANLELINTWVAKNTNPK</a> | Deamidated N23 0.29%  |
| 42.8  | 2672.3405 | 0.0105  | <a href="#">VLSNNSDANLELINTWVAKNTNPK</a> | Deamidated N22 0.29%  |
| 42.8  | 2672.3405 | 0.0105  | <a href="#">VLSNNSDANLELINTWVAKNTNPK</a> | Deamidated N20 0.29%  |
| 4.5   | 2671.3488 | 1.0022  | <a href="#">LMNIFLKDSITTWEILAVSMSDK</a>  |                       |
| 3.2   | 2672.3558 | -0.0048 | <a href="#">YSYDLNGLHLLSPGNSARLTPLR</a>  |                       |

Mascot: <http://www.matrixscience.com/>

# MATRIX SCIENCE Mascot Search Results

## Peptide View

MS/MS Fragmentation of **GVTSVSQIFHSPDLAIRDTFVNASR**

Found in **B4E1F0** in **con\_Xuniprot\_HUMAN3**, B4E1F0\_HUMAN Plasma protease C1 inhibitor OS=Homo sapiens GN=SERPING1 PE=2 SV=1

Match to Query 25392: 2717.388342 from(906.803390,3+) intensity(130552.4375) rtinseconds(2038) scans(5245) index(22718)

Title: 111019\_Est\_ML\_YS\_G\_03Spectrum4593\_scans\_\_5245

Data file C:\mascot\20140703\_Tmgf\_1D\CSV\_UseAnalysis\MasterCSV\All\_Glyco\mgf\ptm\UC18ERLIC\_PTM\_35D.mgf

Click mouse within plot area to zoom in by factor of two about that point

Or, to Da

Label all possible matches Label matches used for scoring

Show Y-axis

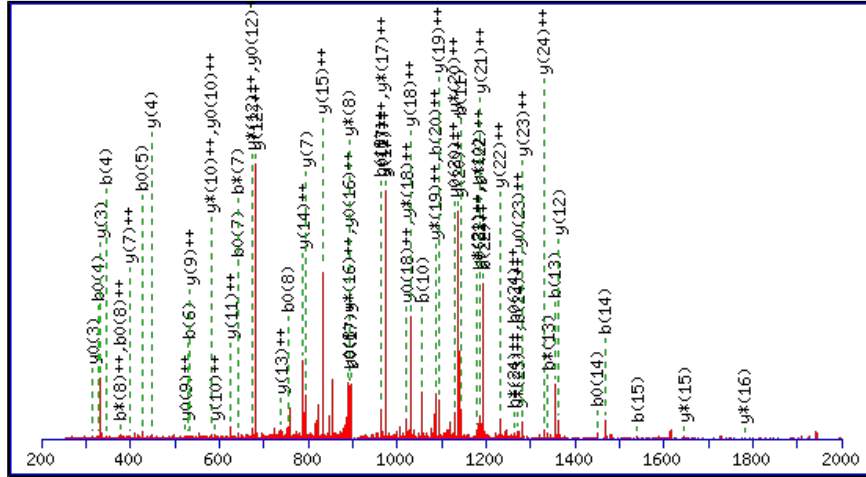

Monoisotopic mass of neutral peptide Mr(calc): 2717.3773

Fixed modifications: Carbamidomethyl (C) (apply to specified residues or termini only)

Variable modifications:

N22 : Deamidated (NQ)

Ions Score: 65 Expect: 8.2e-005

Matches : 68/270 fragment ions using 138 most intense peaks ([help](#))

| #  | b                | b <sup>++</sup>  | b <sup>*</sup>   | b <sup>*++</sup> | b <sup>0</sup>   | b <sup>0++</sup> | Seq.     | y                | y <sup>++</sup>  | y <sup>*</sup>   | y <sup>*++</sup> | y <sup>0</sup>  | y <sup>0++</sup> | #         |
|----|------------------|------------------|------------------|------------------|------------------|------------------|----------|------------------|------------------|------------------|------------------|-----------------|------------------|-----------|
| 1  | 58.0287          | 29.5180          |                  |                  |                  |                  | <b>G</b> |                  |                  |                  |                  |                 |                  | <b>25</b> |
| 2  | 157.0972         | 79.0522          |                  |                  |                  |                  | <b>V</b> | 2661.3631        | <b>1331.1852</b> | 2644.3366        | 1322.6719        | 2643.3525       | 1322.1799        | <b>24</b> |
| 3  | 258.1448         | 129.5761         |                  |                  | 240.1343         | 120.5708         | <b>T</b> | 2562.2947        | <b>1281.6510</b> | 2545.2681        | <b>1273.1377</b> | 2544.2841       | <b>1272.6457</b> | <b>23</b> |
| 4  | <b>345.1769</b>  | 173.0921         |                  |                  | <b>327.1663</b>  | 164.0868         | <b>S</b> | 2461.2470        | <b>1231.1271</b> | 2444.2205        | 1222.6139        | 2443.2364       | 1222.1219        | <b>22</b> |
| 5  | 444.2453         | 222.6263         |                  |                  | <b>426.2347</b>  | 213.6210         | <b>V</b> | 2374.2150        | <b>1187.6111</b> | 2357.1884        | <b>1179.0979</b> | 2356.2044       | 1178.6058        | <b>21</b> |
| 6  | <b>531.2773</b>  | 266.1423         |                  |                  | 513.2667         | 257.1370         | <b>S</b> | 2275.1466        | <b>1138.0769</b> | 2258.1200        | <b>1129.5636</b> | 2257.1360       | <b>1129.0716</b> | <b>20</b> |
| 7  | 659.3359         | 330.1716         | <b>642.3093</b>  | 321.6583         | <b>641.3253</b>  | 321.1663         | <b>Q</b> | 2188.1145        | <b>1094.5609</b> | 2171.0880        | <b>1086.0476</b> | 2170.1040       | 1085.5556        | <b>19</b> |
| 8  | 772.4199         | 386.7136         | 755.3934         | <b>378.2003</b>  | <b>754.4094</b>  | <b>377.7083</b>  | <b>I</b> | 2060.0560        | <b>1030.5316</b> | 2043.0294        | <b>1022.0183</b> | 2042.0454       | <b>1021.5263</b> | <b>18</b> |
| 9  | 919.4884         | 460.2478         | 902.4618         | 451.7345         | 901.4778         | 451.2425         | <b>F</b> | 1946.9719        | <b>973.9896</b>  | 1929.9454        | <b>965.4763</b>  | 1928.9613       | <b>964.9843</b>  | <b>17</b> |
| 10 | <b>1056.5473</b> | 528.7773         | 1039.5207        | 520.2640         | 1038.5367        | 519.7720         | <b>H</b> | 1799.9035        | 900.4554         | <b>1782.8769</b> | <b>891.9421</b>  | 1781.8929       | <b>891.4501</b>  | <b>16</b> |
| 11 | <b>1143.5793</b> | 572.2933         | 1126.5528        | 563.7800         | 1125.5687        | 563.2880         | <b>S</b> | 1662.8446        | <b>831.9259</b>  | <b>1645.8180</b> | 823.4127         | 1644.8340       | 822.9206         | <b>15</b> |
| 12 | 1240.6321        | 620.8197         | 1223.6055        | 612.3064         | 1222.6215        | 611.8144         | <b>P</b> | 1575.8125        | <b>788.4099</b>  | 1558.7860        | 779.8966         | 1557.8020       | 779.4046         | <b>14</b> |
| 13 | <b>1355.6590</b> | 678.3331         | <b>1338.6325</b> | 669.8199         | 1337.6484        | 669.3279         | <b>D</b> | 1478.7598        | <b>739.8835</b>  | 1461.7332        | 731.3703         | 1460.7492       | 730.8782         | <b>13</b> |
| 14 | <b>1468.7431</b> | 734.8752         | 1451.7165        | 726.3619         | <b>1450.7325</b> | 725.8699         | <b>L</b> | <b>1363.7328</b> | <b>682.3701</b>  | 1346.7063        | <b>673.8568</b>  | 1345.7223       | <b>673.3648</b>  | <b>12</b> |
| 15 | <b>1539.7802</b> | 770.3937         | 1522.7536        | 761.8805         | 1521.7696        | 761.3884         | <b>A</b> | 1250.6488        | <b>625.8280</b>  | 1233.6222        | 617.3148         | 1232.6382       | 616.8227         | <b>11</b> |
| 16 | 1652.8642        | 826.9358         | 1635.8377        | 818.4225         | 1634.8537        | 817.9305         | <b>I</b> | <b>1179.6117</b> | <b>590.3095</b>  | 1162.5851        | <b>581.7962</b>  | 1161.6011       | <b>581.3042</b>  | <b>10</b> |
| 17 | 1808.9654        | 904.9863         | 1791.9388        | 896.4730         | 1790.9548        | <b>895.9810</b>  | <b>R</b> | 1066.5276        | <b>533.7674</b>  | 1049.5010        | 525.2542         | 1048.5170       | <b>524.7622</b>  | <b>9</b>  |
| 18 | 1923.9923        | <b>962.4998</b>  | 1906.9658        | 953.9865         | 1905.9817        | 953.4945         | <b>D</b> | 910.4265         | 455.7169         | <b>893.3999</b>  | 447.2036         | <b>892.4159</b> | 446.7116         | <b>8</b>  |
| 19 | 2025.0400        | 1013.0236        | 2008.0134        | 1004.5104        | 2007.0294        | 1004.0183        | <b>T</b> | <b>795.3995</b>  | <b>398.2034</b>  | 778.3730         | 389.6901         | 777.3890        | 389.1981         | <b>7</b>  |
| 20 | 2172.1084        | <b>1086.5578</b> | 2155.0818        | 1078.0446        | 2154.0978        | 1077.5526        | <b>F</b> | 694.3519         | 347.6796         | 677.3253         | 339.1663         | 676.3413        | 338.6743         | <b>6</b>  |
| 21 | 2271.1768        | 1136.0920        | 2254.1503        | 1127.5788        | 2253.1662        | 1127.0868        | <b>V</b> | 547.2835         | 274.1454         | 530.2569         | 265.6321         | 529.2729        | 265.1401         | <b>5</b>  |
| 22 | 2386.2038        | <b>1193.6055</b> | 2369.1772        | <b>1185.0922</b> | 2368.1932        | <b>1184.6002</b> | <b>N</b> | <b>448.2150</b>  | 224.6112         | 431.1885         | 216.0979         | 430.2045        | 215.6059         | <b>4</b>  |
| 23 | 2457.2409        | 1229.1241        | 2440.2143        | 1220.6108        | 2439.2303        | 1220.1188        | <b>A</b> | <b>333.1881</b>  | 167.0977         | 316.1615         | 158.5844         | <b>315.1775</b> | 158.0924         | <b>3</b>  |



|    |           |           |           |           |           |           |   |          |          |          |          |          |          |   |
|----|-----------|-----------|-----------|-----------|-----------|-----------|---|----------|----------|----------|----------|----------|----------|---|
| 24 | 2544.2729 | 1272.6401 | 2527.2463 | 1264.1268 | 2526.2623 | 1263.6348 | S | 262.1510 | 131.5791 | 245.1244 | 123.0659 | 244.1404 | 122.5738 | 2 |
| 25 |           |           |           |           |           |           | R | 175.1190 | 88.0631  | 158.0924 | 79.5498  |          |          | 1 |

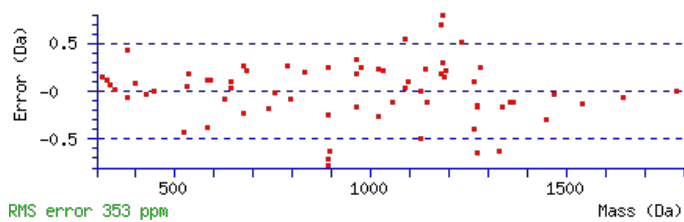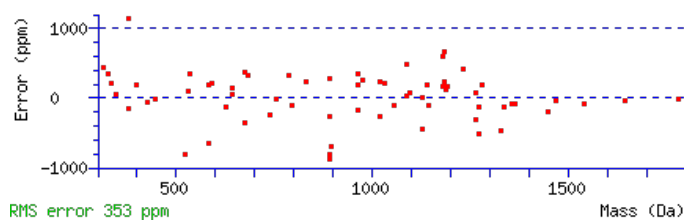

NCBI BLAST search of [GVTSVSQIEHSPDLAIRDTFVNASR](#)

(Parameters: blastp, nr protein database, expect=20000, no filter, PAM30)

Other BLAST [web gateways](#)

**All matches to this query**

| Score | Mr(calc)  | Delta  | Sequence                                   | Site Analysis         |
|-------|-----------|--------|--------------------------------------------|-----------------------|
| 64.6  | 2717.3773 | 0.0110 | <a href="#">GVTSVSQIEHSPDLAIRDTFVNASR</a>  | Deamidated N22 99.71% |
| 39.2  | 2717.3773 | 0.0110 | <a href="#">GVTSVSQIEHSPDLAIRDTFVNASR</a>  | Deamidated Q7 0.29%   |
| 38.7  | 2716.3933 | 0.9950 | <a href="#">GVTSVSQIEHSPDLAIRDTFVNASR</a>  |                       |
| 5.0   | 2715.3698 | 2.0186 | <a href="#">LHRACVLGDGGNNGPGCIVLVTPPSR</a> |                       |
| 3.7   | 2717.3793 | 0.0091 | <a href="#">AIQMAQEQATDTEILERKTVLPSK</a>   |                       |
| 3.7   | 2717.3793 | 0.0091 | <a href="#">AIQMAQEQATDTEILERKTVLPSK</a>   |                       |
| 3.7   | 2717.3793 | 0.0091 | <a href="#">AIQMAQEQATDTEILERKTVLPSK</a>   |                       |
| 2.9   | 2715.3789 | 2.0095 | <a href="#">KISIVTNWNAPQNIEEQDIVMKK</a>    |                       |
| 2.9   | 2715.3789 | 2.0095 | <a href="#">KISIVTNWNAPQNIEEQDIVMKK</a>    |                       |
| 2.9   | 2715.3789 | 2.0095 | <a href="#">KISIVTNWNAPQNIEEQDIVMKK</a>    |                       |

Mascot: <http://www.matrixscience.com/>

# MASCOT SCIENCE Mascot Search Results

## Peptide View

MS/MS Fragmentation of **DTFVNASR**

Found in **B4E1F0** in **con\_Xuniprot\_HUMAN3**, B4E1F0\_HUMAN Plasma protease C1 inhibitor OS=Homo sapiens  
GN=SERPING1 PE=2 SV=1

Match to Query 15: 909.419728 from(455.717140,2+) intensity(181831.8594) rtinseconds(434) scans(779) index(12274)

Title: 111019\_Est\_ISCardio\_NMI\_YS\_G\_9Spectrum644\_scans\_\_779

Data file C:\mascot\20140703\_Tmgf\_1D\CSV\_UseAnalysis\MasterCSV\All\_Glyco\mgf\ptm\UC18ERLIC\_PTM\_35D.mgf

Click mouse within plot area to zoom in by factor of two about that point

Or, to Da

Label all possible matches Label matches used for scoring

Show Y-axis

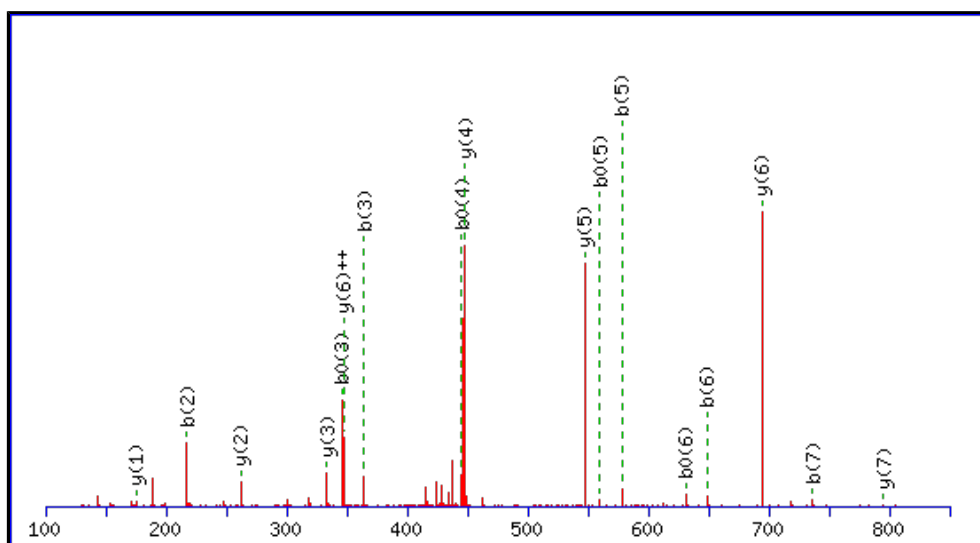

Monoisotopic mass of neutral peptide  $M_r(\text{calc})$ : 909.4192

Fixed modifications: Carbamidomethyl (C) (apply to specified residues or termini only)

Variable modifications:

N5 : Deamidated (NQ)

Ions Score: 55 Expect: 0.00033

Matches : 17/74 fragment ions using 28 most intense peaks ([help](#))

| # | b               | b <sup>++</sup> | b*       | b <sup>+++</sup> | b <sup>0</sup>  | b <sup>0++</sup> | Seq. | y               | y <sup>++</sup> | y*       | y <sup>+++</sup> | y <sup>0</sup> | y <sup>0++</sup> | # |
|---|-----------------|-----------------|----------|------------------|-----------------|------------------|------|-----------------|-----------------|----------|------------------|----------------|------------------|---|
| 1 | 116.0342        | 58.5207         |          |                  | 98.0237         | 49.5155          | D    |                 |                 |          |                  |                |                  | 8 |
| 2 | <b>217.0819</b> | 109.0446        |          |                  | 199.0713        | 100.0393         | T    | <b>795.3995</b> | 398.2034        | 778.3730 | 389.6901         | 777.3890       | 389.1981         | 7 |
| 3 | <b>364.1503</b> | 182.5788        |          |                  | <b>346.1397</b> | 173.5735         | F    | <b>694.3519</b> | <b>347.6796</b> | 677.3253 | 339.1663         | 676.3413       | 338.6743         | 6 |
| 4 | 463.2187        | 232.1130        |          |                  | <b>445.2082</b> | 223.1077         | V    | <b>547.2835</b> | 274.1454        | 530.2569 | 265.6321         | 529.2729       | 265.1401         | 5 |
| 5 | <b>578.2457</b> | 289.6265        | 561.2191 | 281.1132         | <b>560.2351</b> | 280.6212         | N    | <b>448.2150</b> | 224.6112        | 431.1885 | 216.0979         | 430.2045       | 215.6059         | 4 |
| 6 | <b>649.2828</b> | 325.1450        | 632.2562 | 316.6318         | <b>631.2722</b> | 316.1397         | A    | <b>333.1881</b> | 167.0977        | 316.1615 | 158.5844         | 315.1775       | 158.0924         | 3 |
| 7 | <b>736.3148</b> | 368.6610        | 719.2883 | 360.1478         | 718.3042        | 359.6558         | S    | <b>262.1510</b> | 131.5791        | 245.1244 | 123.0659         | 244.1404       | 122.5738         | 2 |
| 8 |                 |                 |          |                  |                 |                  | R    | <b>175.1190</b> | 88.0631         | 158.0924 | 79.5498          |                |                  | 1 |

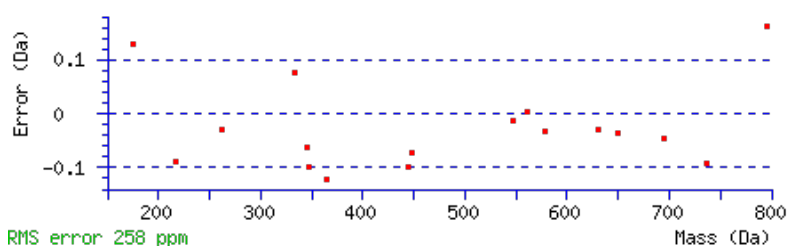

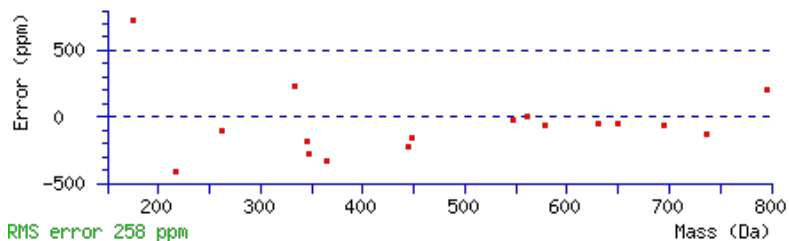

NCBI **BLAST** search of [DTEVNASR](#)

(Parameters: blastp, nr protein database, expect=20000, no filter, PAM30)

Other BLAST [web gateways](#)

**All matches to this query**

| Score | Mr(calc) | Delta   | Sequence                   |
|-------|----------|---------|----------------------------|
| 54.7  | 909.4192 | 0.0005  | <a href="#">DTEVNASR</a>   |
| 20.0  | 909.4192 | 0.0005  | <a href="#">NFTPSTSR</a>   |
| 14.2  | 909.4192 | 0.0005  | <a href="#">DTEFRSPS</a>   |
| 13.3  | 909.4152 | 0.0045  | <a href="#">SGTSGSATSR</a> |
| 12.7  | 909.4192 | 0.0005  | <a href="#">TDTPESSR</a>   |
| 5.6   | 908.4208 | 0.9989  | <a href="#">IMAQMQR</a>    |
| 5.2   | 907.4134 | 2.0063  | <a href="#">SQQTLDSK</a>   |
| 4.3   | 909.4192 | 0.0005  | <a href="#">VFTTNGR</a>    |
| 4.0   | 909.4226 | -0.0028 | <a href="#">GMKTSGANK</a>  |
| 4.0   | 909.4225 | -0.0028 | <a href="#">KSANAKGSM</a>  |

Mascot: <http://www.matrixscience.com/>

# MATRIX SCIENCE Mascot Search Results

## Peptide View

MS/MS Fragmentation of **DTFVNASRTLYSSSPR**

Found in **B4E1F0** in **con\_Xuniprot\_HUMAN3**, B4E1F0\_HUMAN Plasma protease C1 inhibitor OS=Homo sapiens GN=SERPING1 PE=2 SV=1

Match to Query 10896: 1800.872968 from(901.443760,2+) intensity(151624.7188) rtinseconds(1250) scans(2978) index(25267)

Title: 111019\_Est\_MI\_YS\_G\_07Spectrum2519\_scans\_2978

Data file C:\mascot\20140703\_Tmgf\_1D\CSV\_UseAnalysis\MasterCSV\All\_Glyco\mgf\ptm\UC18ERLIC\_PTM\_35D.mgf

Click mouse within plot area to zoom in by factor of two about that point

Or, to Da

Label all possible matches Label matches used for scoring

Show Y-axis

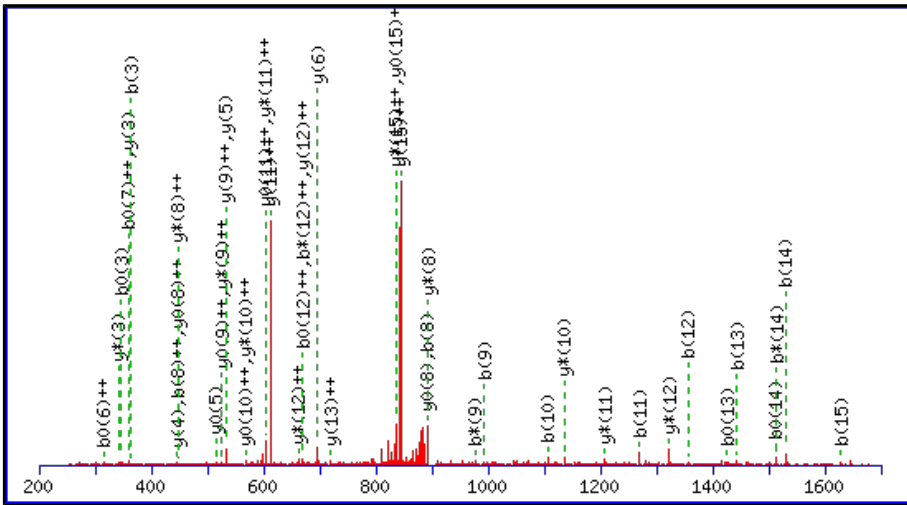

Monoisotopic mass of neutral peptide  $M_r(\text{calc})$ : 1800.8642

Fixed modifications: Carbamidomethyl (C) (apply to specified residues or termini only)

Variable modifications:

N5 : Deamidated (NQ)

Ions Score: 50 Expect: 0.0021

Matches : 46/168 fragment ions using 72 most intense peaks ([help](#))

| #  | b         | b <sup>++</sup> | b <sup>*</sup> | b <sup>***</sup> | b <sup>0</sup> | b <sup>0++</sup> | Seq. | y         | y <sup>++</sup> | y <sup>*</sup> | y <sup>***</sup> | y <sup>0</sup> | y <sup>0++</sup> | #  |
|----|-----------|-----------------|----------------|------------------|----------------|------------------|------|-----------|-----------------|----------------|------------------|----------------|------------------|----|
| 1  | 116.0342  | 58.5207         |                |                  | 98.0237        | 49.5155          | D    |           |                 |                |                  |                |                  | 16 |
| 2  | 217.0819  | 109.0446        |                |                  | 199.0713       | 100.0393         | T    | 1686.8446 | 843.9259        | 1669.8180      | 835.4127         | 1668.8340      | 834.9206         | 15 |
| 3  | 364.1503  | 182.5788        |                |                  | 346.1397       | 173.5735         | F    | 1585.7969 | 793.4021        | 1568.7703      | 784.8888         | 1567.7863      | 784.3968         | 14 |
| 4  | 463.2187  | 232.1130        |                |                  | 445.2082       | 223.1077         | V    | 1438.7285 | 719.8679        | 1421.7019      | 711.3546         | 1420.7179      | 710.8626         | 13 |
| 5  | 578.2457  | 289.6265        | 561.2191       | 281.1132         | 560.2351       | 280.6212         | N    | 1339.6601 | 670.3337        | 1322.6335      | 661.8204         | 1321.6495      | 661.3284         | 12 |
| 6  | 649.2828  | 325.1450        | 632.2562       | 316.6318         | 631.2722       | 316.1397         | A    | 1224.6331 | 612.8202        | 1207.6066      | 604.3069         | 1206.6226      | 603.8149         | 11 |
| 7  | 736.3148  | 368.6610        | 719.2883       | 360.1478         | 718.3042       | 359.6558         | S    | 1153.5960 | 577.3016        | 1136.5695      | 568.7884         | 1135.5854      | 568.2964         | 10 |
| 8  | 892.4159  | 446.7116        | 875.3894       | 438.1983         | 874.4054       | 437.7063         | R    | 1066.5640 | 533.7856        | 1049.5374      | 525.2724         | 1048.5534      | 524.7803         | 9  |
| 9  | 993.4636  | 497.2354        | 976.4371       | 488.7222         | 975.4530       | 488.2302         | T    | 910.4629  | 455.7351        | 893.4363       | 447.2218         | 892.4523       | 446.7298         | 8  |
| 10 | 1106.5477 | 553.7775        | 1089.5211      | 545.2642         | 1088.5371      | 544.7722         | L    | 809.4152  | 405.2112        | 792.3886       | 396.6980         | 791.4046       | 396.2060         | 7  |
| 11 | 1269.6110 | 635.3091        | 1252.5844      | 626.7959         | 1251.6004      | 626.3039         | Y    | 696.3311  | 348.6692        | 679.3046       | 340.1559         | 678.3206       | 339.6639         | 6  |
| 12 | 1356.6430 | 678.8251        | 1339.6165      | 670.3119         | 1338.6325      | 669.8199         | S    | 533.2678  | 267.1375        | 516.2413       | 258.6243         | 515.2572       | 258.1323         | 5  |
| 13 | 1443.6751 | 722.3412        | 1426.6485      | 713.8279         | 1425.6645      | 713.3359         | S    | 446.2358  | 223.6215        | 429.2092       | 215.1082         | 428.2252       | 214.6162         | 4  |
| 14 | 1530.7071 | 765.8572        | 1513.6805      | 757.3439         | 1512.6965      | 756.8519         | S    | 359.2037  | 180.1055        | 342.1772       | 171.5922         | 341.1932       | 171.1002         | 3  |
| 15 | 1627.7598 | 814.3836        | 1610.7333      | 805.8703         | 1609.7493      | 805.3783         | P    | 272.1717  | 136.5895        | 255.1452       | 128.0762         |                |                  | 2  |
| 16 |           |                 |                |                  |                |                  | R    | 175.1190  | 88.0631         | 158.0924       | 79.5498          |                |                  | 1  |

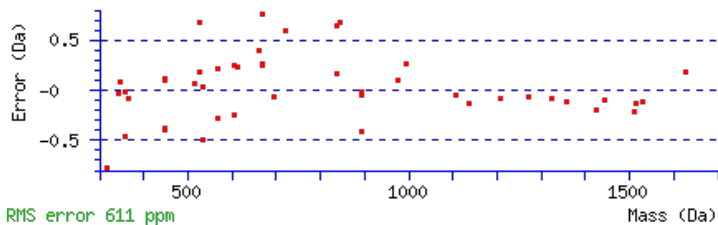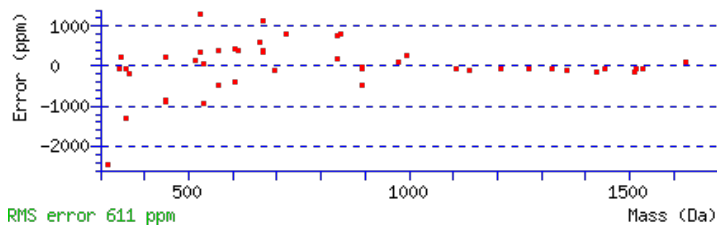

NCBI **BLAST** search of [DTFVNASRTLYSSSPR](#)

(Parameters: blastp, nr protein database, expect=20000, no filter, PAM30)

Other BLAST [web gateways](#)

**All matches to this query**

| Score | Mr(calc)  | Delta   | Sequence                             |
|-------|-----------|---------|--------------------------------------|
| 50.1  | 1800.8642 | 0.0087  | <a href="#">DTFVNASRTLYSSSPR</a>     |
| 10.9  | 1799.8611 | 1.0119  | <a href="#">IVVYTACNNGSSSVISK</a>    |
| 4.9   | 1799.8764 | 0.9966  | <a href="#">IGCYVTIFQNISNLR</a>      |
| 3.5   | 1800.8754 | -0.0024 | <a href="#">DEAQLYKEEHLRNR</a>       |
| 3.2   | 1800.8741 | -0.0011 | <a href="#">ELQGAQEDLGISLSSPR</a>    |
| 3.0   | 1800.8689 | 0.0040  | <a href="#">NEGHHLKMHTSLSGPR</a>     |
| 3.0   | 1800.8788 | -0.0059 | <a href="#">DSLROLEAMVQODPR</a>      |
| 2.6   | 1799.8762 | 0.9967  | <a href="#">ASSAQSGGSSGGPAVPTVQR</a> |
| 1.8   | 1799.8624 | 1.0105  | <a href="#">LAQFDYGRKCSEVAR</a>      |
| 1.6   | 1800.8676 | 0.0054  | <a href="#">NLSPOSPKGQLAACSNK</a>    |

Mascot: <http://www.matrixscience.com/>

# MATRIX SCIENCE Mascot Search Results

## Peptide View

MS/MS Fragmentation of **GVTSVSQIFHSPDLAIRDTFVNASR**

Found in **B4E1F0** in **con\_Xuniprot\_HUMAN3**, B4E1F0\_HUMAN Plasma protease C1 inhibitor OS=Homo sapiens GN=SERPING1 PE=2 SV=1

Match to Query 25401: 2718.365082 from(907.128970,3+) intensity(13913.7373) rtinseconds(3158) scans(8328) index(22947)

Title: 111019\_Est\_MI\_YS\_G\_03Spectrum7334\_scans\_\_8328

Data file C:\mascot\20140703\_Tmgf\_1D\CSV\_UseAnalysis\MasterCSV\All\_Glyco\mgf\ptm\UC18ERLIC\_PTM\_35D.mgf

Click mouse within plot area to zoom in by factor of two about that point

Or, to Da

Label all possible matches Label matches used for scoring

Show Y-axis

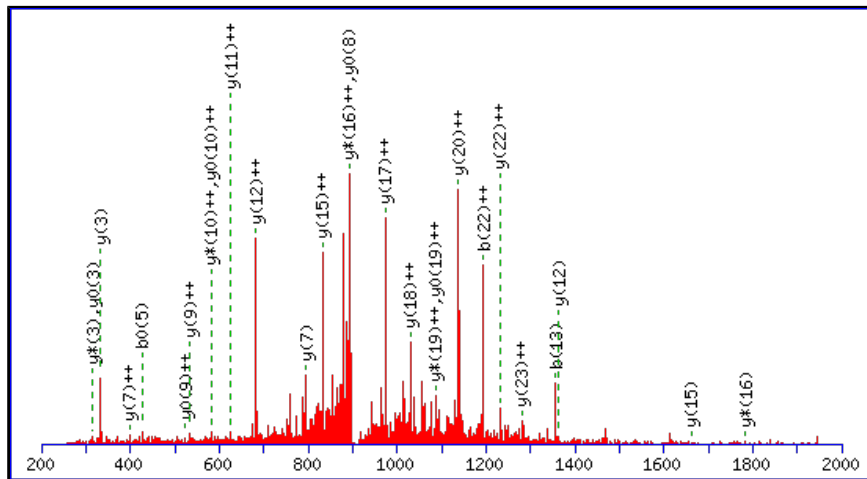

Monoisotopic mass of neutral peptide Mr(calc): 2718.3613

Fixed modifications: Carbamidomethyl (C) (apply to specified residues or termini only)

Variable modifications:

Q7 : Deamidated (NQ)

N22 : Deamidated (NQ)

Ions Score: 37 Expect: 0.053

Matches : 27/270 fragment ions using 51 most intense peaks ([help](#))

| #  | b         | b <sup>++</sup> | b*        | b <sup>*++</sup> | b <sup>0</sup> | b <sup>0++</sup> | Seq. | y         | y <sup>++</sup> | y*        | y <sup>*++</sup> | y <sup>0</sup> | y <sup>0++</sup> | #  |
|----|-----------|-----------------|-----------|------------------|----------------|------------------|------|-----------|-----------------|-----------|------------------|----------------|------------------|----|
| 1  | 58.0287   | 29.5180         |           |                  |                |                  | G    |           |                 |           |                  |                |                  | 25 |
| 2  | 157.0972  | 79.0522         |           |                  |                |                  | V    | 2662.3471 | 1331.6772       | 2645.3206 | 1323.1639        | 2644.3366      | 1322.6719        | 24 |
| 3  | 258.1448  | 129.5761        |           |                  | 240.1343       | 120.5708         | T    | 2563.2787 | 1282.1430       | 2546.2522 | 1273.6297        | 2545.2681      | 1273.1377        | 23 |
| 4  | 345.1769  | 173.0921        |           |                  | 327.1663       | 164.0868         | S    | 2462.2310 | 1231.6192       | 2445.2045 | 1223.1059        | 2444.2205      | 1222.6139        | 22 |
| 5  | 444.2453  | 222.6263        |           |                  | 426.2347       | 213.6210         | V    | 2375.1990 | 1188.1031       | 2358.1725 | 1179.5899        | 2357.1884      | 1179.0979        | 21 |
| 6  | 531.2773  | 266.1423        |           |                  | 513.2667       | 257.1370         | S    | 2276.1306 | 1138.5689       | 2259.1040 | 1130.0557        | 2258.1200      | 1129.5636        | 20 |
| 7  | 660.3199  | 330.6636        | 643.2933  | 322.1503         | 642.3093       | 321.6583         | Q    | 2189.0986 | 1095.0529       | 2172.0720 | 1086.5396        | 2171.0880      | 1086.0476        | 19 |
| 8  | 773.4040  | 387.2056        | 756.3774  | 378.6923         | 755.3934       | 378.2003         | I    | 2060.0560 | 1030.5316       | 2043.0294 | 1022.0183        | 2042.0454      | 1021.5263        | 18 |
| 9  | 920.4724  | 460.7398        | 903.4458  | 452.2266         | 902.4618       | 451.7345         | F    | 1946.9719 | 973.9896        | 1929.9454 | 965.4763         | 1928.9613      | 964.9843         | 17 |
| 10 | 1057.5313 | 529.2693        | 1040.5047 | 520.7560         | 1039.5207      | 520.2640         | H    | 1799.9035 | 900.4554        | 1782.8769 | 891.9421         | 1781.8929      | 891.4501         | 16 |
| 11 | 1144.5633 | 572.7853        | 1127.5368 | 564.2720         | 1126.5528      | 563.7800         | S    | 1662.8446 | 831.9259        | 1645.8180 | 823.4127         | 1644.8340      | 822.9206         | 15 |
| 12 | 1241.6161 | 621.3117        | 1224.5895 | 612.7984         | 1223.6055      | 612.3064         | P    | 1575.8125 | 788.4099        | 1558.7860 | 779.8966         | 1557.8020      | 779.4046         | 14 |
| 13 | 1356.6430 | 678.8251        | 1339.6165 | 670.3119         | 1338.6325      | 669.8199         | D    | 1478.7598 | 739.8835        | 1461.7332 | 731.3703         | 1460.7492      | 730.8782         | 13 |
| 14 | 1469.7271 | 735.3672        | 1452.7005 | 726.8539         | 1451.7165      | 726.3619         | L    | 1363.7328 | 682.3701        | 1346.7063 | 673.8568         | 1345.7223      | 673.3648         | 12 |
| 15 | 1540.7642 | 770.8857        | 1523.7377 | 762.3725         | 1522.7536      | 761.8805         | A    | 1250.6488 | 625.8280        | 1233.6222 | 617.3148         | 1232.6382      | 616.8227         | 11 |
| 16 | 1653.8483 | 827.4278        | 1636.8217 | 818.9145         | 1635.8377      | 818.4225         | I    | 1179.6117 | 590.3095        | 1162.5851 | 581.7962         | 1161.6011      | 581.3042         | 10 |
| 17 | 1809.9494 | 905.4783        | 1792.9228 | 896.9651         | 1791.9388      | 896.4730         | R    | 1066.5276 | 533.7674        | 1049.5010 | 525.2542         | 1048.5170      | 524.7622         | 9  |
| 18 | 1924.9763 | 962.9918        | 1907.9498 | 954.4785         | 1906.9658      | 953.9865         | D    | 910.4265  | 455.7169        | 893.3999  | 447.2036         | 892.4159       | 446.7116         | 8  |
| 19 | 2026.0240 | 1013.5156       | 2008.9974 | 1005.0024        | 2008.0134      | 1004.5104        | T    | 795.3995  | 398.2034        | 778.3730  | 389.6901         | 777.3890       | 389.1981         | 7  |
| 20 | 2173.0924 | 1087.0498       | 2156.0659 | 1078.5366        | 2155.0818      | 1078.0446        | F    | 694.3519  | 347.6796        | 677.3253  | 339.1663         | 676.3413       | 338.6743         | 6  |
| 21 | 2272.1608 | 1136.5841       | 2255.1343 | 1128.0708        | 2254.1503      | 1127.5788        | V    | 547.2835  | 274.1454        | 530.2569  | 265.6321         | 529.2729       | 265.1401         | 5  |
| 22 | 2387.1878 | 1194.0975       | 2370.1612 | 1185.5842        | 2369.1772      | 1185.0922        | N    | 448.2150  | 224.6112        | 431.1885  | 216.0979         | 430.2045       | 215.6059         | 4  |



|    |           |           |           |           |           |           |   |          |          |          |          |          |          |   |
|----|-----------|-----------|-----------|-----------|-----------|-----------|---|----------|----------|----------|----------|----------|----------|---|
| 23 | 2458.2249 | 1229.6161 | 2441.1983 | 1221.1028 | 2440.2143 | 1220.6108 | A | 333.1881 | 167.0977 | 316.1615 | 158.5844 | 315.1775 | 158.0924 | 3 |
| 24 | 2545.2569 | 1273.1321 | 2528.2304 | 1264.6188 | 2527.2463 | 1264.1268 | S | 262.1510 | 131.5791 | 245.1244 | 123.0659 | 244.1404 | 122.5738 | 2 |
| 25 |           |           |           |           |           |           | R | 175.1190 | 88.0631  | 158.0924 | 79.5498  |          |          | 1 |

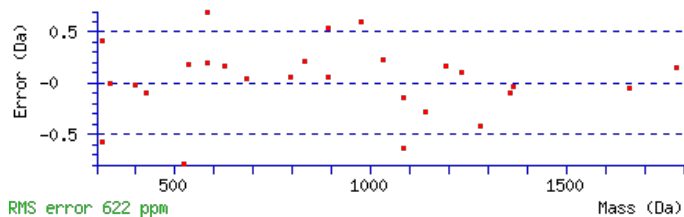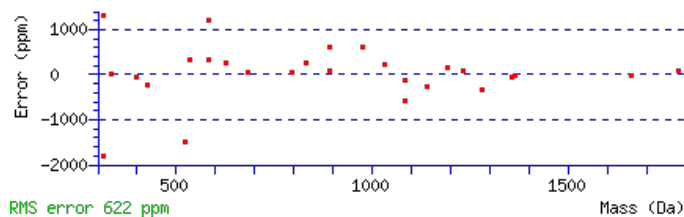

NCBI BLAST search of [GVTSVSOIEHSPDLAIRDTFVNASR](#)  
 (Parameters: blastp, nr protein database, expect=20000, no filter, PAM30)  
 Other BLAST [web gateways](#)

All matches to this query

| Score | Mr(calc)  | Delta   | Sequence                                   |
|-------|-----------|---------|--------------------------------------------|
| 37.3  | 2718.3613 | 0.0038  | <a href="#">GVTSVSOIEHSPDLAIRDTFVNASR</a>  |
| 9.2   | 2716.3629 | 2.0022  | <a href="#">KISIVTNWNAPQNIIEQDIVMKK</a>    |
| 7.5   | 2716.3663 | 1.9988  | <a href="#">MAVVLPVVEELLSEMAAAVQESARS</a>  |
| 4.6   | 2717.3508 | 1.0143  | <a href="#">QKSPEQQETVLDGNLIIRYDVDR</a>    |
| 2.5   | 2717.3507 | 1.0143  | <a href="#">QQAEARNAGLLSLLGQSVVEIDRFA</a>  |
| 2.3   | 2718.3759 | -0.0108 | <a href="#">NKAGPLAEGQPNVVLPOGCVRQDAK</a>  |
| 2.2   | 2716.3602 | 2.0049  | <a href="#">DRGLYVCAARNSAGQTL SAVQLHVK</a> |
| 2.0   | 2716.3629 | 2.0022  | <a href="#">AKNYLSDVVKSMNQITELAAEYTK</a>   |
| 2.0   | 2716.3629 | 2.0022  | <a href="#">MQTSVSEIEQVLPVLITENIWNR</a>    |
| 2.0   | 2716.3629 | 2.0022  | <a href="#">MQTSVSEIEQVLPVLITENIWNR</a>    |

Mascot: <http://www.matrixscience.com/>

# MASCOT SCIENCE Mascot Search Results

## Peptide View

MS/MS Fragmentation of **LTDITCGVGNMSANASDQER**

Found in **B4DQI1** in **con\_Xuniprot\_HUMAN3**, B4DQI1\_HUMAN Complement C2b fragment OS=Homo sapiens GN=C2 PE=2 SV=1

Match to Query 14427: 2155.910508 from(1078.962530,2+) intensity(40049.3516) rtinseconds(713) scans(1537) index(10775)

Title: 111019\_Est\_ISCardio\_NMI\_YS\_G\_7Spectrum1278\_scans\_1537

Data file C:\mascot\20140703\_Tmgf\_1D\CSV\_UseAnalysis\MasterCSV\All\_Glyco\mgf\ptm\UC18ERLIC\_PTM\_35D.mgf

Click mouse within plot area to zoom in by factor of two about that point

Or, to Da

Label all possible matches Label matches used for scoring

Show Y-axis

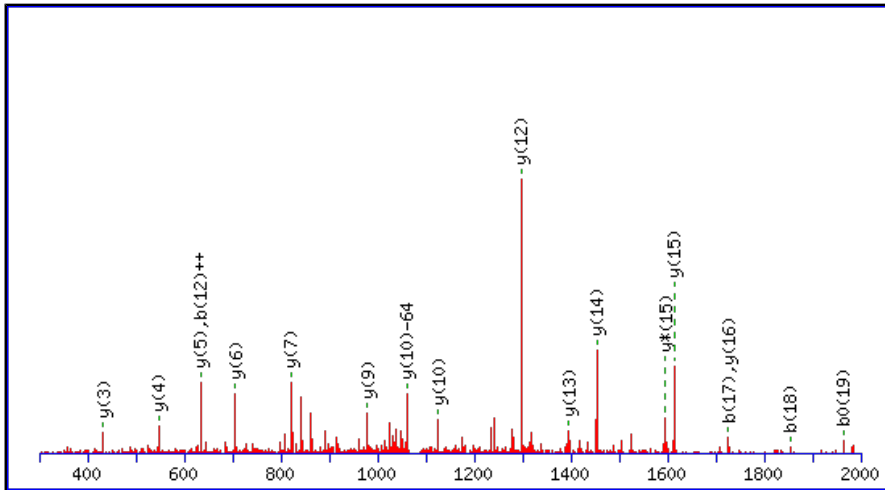

Monoisotopic mass of neutral peptide **Mr(calc):** 2155.8998

Fixed modifications: Carbamidomethyl (C) (apply to specified residues or termini only)

Variable modifications:

N10 : Deamidated (NQ)

M11 : Oxidation (M), with neutral losses 0.0000(shown in table), 63.9983

N14 : Deamidated (NQ)

Ions Score: 118 Expect: 8e-011

Matches : 18/320 fragment ions using 17 most intense peaks ([help](#))

| #  | b                | b <sup>++</sup> | b <sup>*</sup> | b <sup>*++</sup> | b <sup>0</sup>   | b <sup>0++</sup> | Seq. | y                | y <sup>++</sup> | y <sup>*</sup>   | y <sup>*++</sup> | y <sup>0</sup> | y <sup>0++</sup> | #  |
|----|------------------|-----------------|----------------|------------------|------------------|------------------|------|------------------|-----------------|------------------|------------------|----------------|------------------|----|
| 1  | 114.0913         | 57.5493         |                |                  |                  |                  | L    |                  |                 |                  |                  |                |                  | 20 |
| 2  | 215.1390         | 108.0731        |                |                  | 197.1285         | 99.0679          | T    | 2043.8230        | 1022.4151       | 2026.7964        | 1013.9019        | 2025.8124      | 1013.4099        | 19 |
| 3  | 330.1660         | 165.5866        |                |                  | 312.1554         | 156.5813         | D    | 1942.7753        | 971.8913        | 1925.7488        | 963.3780         | 1924.7647      | 962.8860         | 18 |
| 4  | 431.2136         | 216.1105        |                |                  | 413.2031         | 207.1052         | T    | 1827.7484        | 914.3778        | 1810.7218        | 905.8645         | 1809.7378      | 905.3725         | 17 |
| 5  | 544.2977         | 272.6525        |                |                  | 526.2871         | 263.6472         | I    | <b>1726.7007</b> | 863.8540        | 1709.6741        | 855.3407         | 1708.6901      | 854.8487         | 16 |
| 6  | 704.3284         | 352.6678        |                |                  | 686.3178         | 343.6625         | C    | <b>1613.6166</b> | 807.3120        | <b>1596.5901</b> | 798.7987         | 1595.6061      | 798.3067         | 15 |
| 7  | 761.3498         | 381.1785        |                |                  | 743.3393         | 372.1733         | G    | <b>1453.5860</b> | 727.2966        | 1436.5594        | 718.7834         | 1435.5754      | 718.2913         | 14 |
| 8  | 860.4182         | 430.7128        |                |                  | 842.4077         | 421.7075         | V    | <b>1396.5645</b> | 698.7859        | 1379.5380        | 690.2726         | 1378.5539      | 689.7806         | 13 |
| 9  | 917.4397         | 459.2235        |                |                  | 899.4291         | 450.2182         | G    | <b>1297.4961</b> | 649.2517        | 1280.4696        | 640.7384         | 1279.4855      | 640.2464         | 12 |
| 10 | 1032.4666        | 516.7370        | 1015.4401      | 508.2237         | 1014.4561        | 507.7317         | N    | 1240.4746        | 620.7410        | 1223.4481        | 612.2277         | 1222.4641      | 611.7357         | 11 |
| 11 | 1179.5020        | 590.2547        | 1162.4755      | 581.7414         | 1161.4915        | 581.2494         | M    | <b>1125.4477</b> | 563.2275        | 1108.4211        | 554.7142         | 1107.4371      | 554.2222         | 10 |
| 12 | 1266.5341        | <b>633.7707</b> | 1249.5075      | 625.2574         | 1248.5235        | 624.7654         | S    | <b>978.4123</b>  | 489.7098        | 961.3857         | 481.1965         | 960.4017       | 480.7045         | 9  |
| 13 | 1337.5712        | 669.2892        | 1320.5446      | 660.7760         | 1319.5606        | 660.2839         | A    | 891.3803         | 446.1938        | 874.3537         | 437.6805         | 873.3697       | 437.1885         | 8  |
| 14 | 1452.5981        | 726.8027        | 1435.5716      | 718.2894         | 1434.5876        | 717.7974         | N    | <b>820.3432</b>  | 410.6752        | 803.3166         | 402.1619         | 802.3326       | 401.6699         | 7  |
| 15 | 1523.6352        | 762.3213        | 1506.6087      | 753.8080         | 1505.6247        | 753.3160         | A    | <b>705.3162</b>  | 353.1617        | 688.2897         | 344.6485         | 687.3056       | 344.1565         | 6  |
| 16 | 1610.6673        | 805.8373        | 1593.6407      | 797.3240         | 1592.6567        | 796.8320         | S    | <b>634.2791</b>  | 317.6432        | 617.2525         | 309.1299         | 616.2685       | 308.6379         | 5  |
| 17 | <b>1725.6942</b> | 863.3507        | 1708.6677      | 854.8375         | 1707.6836        | 854.3455         | D    | <b>547.2471</b>  | 274.1272        | 530.2205         | 265.6139         | 529.2365       | 265.1219         | 4  |
| 18 | <b>1853.7528</b> | 927.3800        | 1836.7262      | 918.8668         | 1835.7422        | 918.3747         | Q    | <b>432.2201</b>  | 216.6137        | 415.1936         | 208.1004         | 414.2096       | 207.6084         | 3  |
| 19 | 1982.7954        | 991.9013        | 1965.7688      | 983.3881         | <b>1964.7848</b> | 982.8960         | E    | 304.1615         | 152.5844        | 287.1350         | 144.0711         | 286.1510       | 143.5791         | 2  |
| 20 |                  |                 |                |                  |                  |                  | R    | 175.1190         | 88.0631         | 158.0924         | 79.5498          |                |                  | 1  |

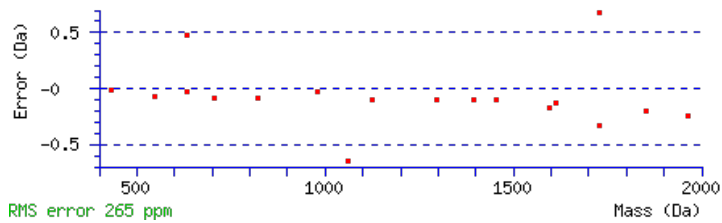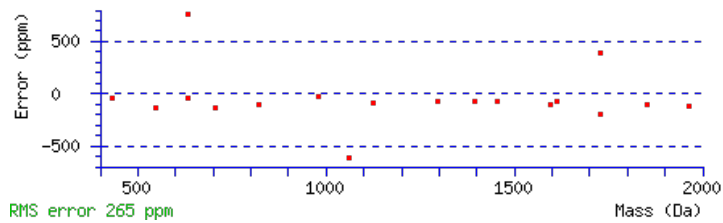

NCBI BLAST search of [LTDTCGVGNMSANASDQER](#)  
 (Parameters: blastp, nr protein database, expect=20000, no filter, PAM30)  
 Other BLAST [web gateways](#)

**All matches to this query**

| Score | Mr(calc)  | Delta   | Sequence                            | Site Analysis              |
|-------|-----------|---------|-------------------------------------|----------------------------|
| 118.2 | 2155.8998 | 0.0107  | <a href="#">LTDTCGVGNMSANASDQER</a> | Deamidated N10, N14 99.87% |
| 89.1  | 2155.8998 | 0.0107  | <a href="#">LTDTCGVGNMSANASDQER</a> | Deamidated N10, Q18 0.12%  |
| 73.6  | 2155.8998 | 0.0107  | <a href="#">LTDTCGVGNMSANASDQER</a> | Deamidated N14, Q18 0.00%  |
| 55.7  | 2154.9158 | 0.9948  | <a href="#">LTDTCGVGNMSANASDQER</a> |                            |
| 43.8  | 2154.9158 | 0.9948  | <a href="#">LTDTCGVGNMSANASDQER</a> |                            |
| 38.2  | 2154.9158 | 0.9948  | <a href="#">LTDTCGVGNMSANASDQER</a> |                            |
| 6.7   | 2155.9141 | -0.0036 | <a href="#">EEEEVNASSEFGQNTNKER</a> |                            |
| 2.3   | 2155.9141 | -0.0036 | <a href="#">EEEEVNASSEFGQNTNKER</a> |                            |
| 2.0   | 2155.9141 | -0.0036 | <a href="#">EEEEVNASSEFGQNTNKER</a> |                            |
| 1.9   | 2154.9099 | 1.0006  | <a href="#">GNHSFDLCFCGREGANLSI</a> |                            |

Mascot: <http://www.matrixscience.com/>

# MATRIX SCIENCE Mascot Search Results

## Peptide View

MS/MS Fragmentation of **LTDITCGVGNMSANASDQER**

Found in **B4DQI1** in **con\_Xuniprot\_HUMAN3**, B4DQI1\_HUMAN Complement C2b fragment OS=Homo sapiens GN=C2 PE=2 SV=1

Match to Query 14389: 2139.913908 from(1070.964230,2+) intensity(13382.8516) rtinseconds(1149) scans(2650) index(12480)

Title: 111019\_Est\_ISCardio\_NMI\_YS\_G\_9Spectrum2297\_scans\_2650

Data file C:\mascot\20140703\_Tmgf\_1D\CSV\_UseAnalysis\MasterCSV\All\_Glyco\mgf\ptm\UC18ERLIC\_PTM\_35D.mgf

Click mouse within plot area to zoom in by factor of two about that point

Or, to Da

Label all possible matches Label matches used for scoring

Show Y-axis

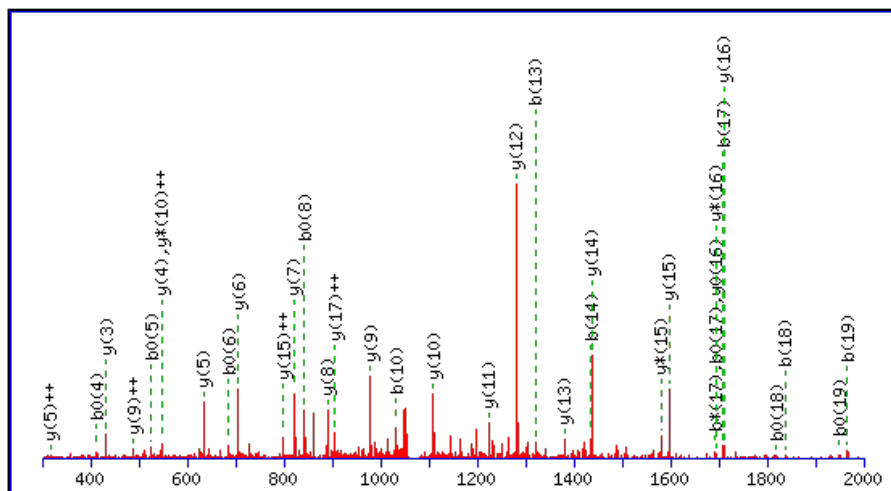

Monoisotopic mass of neutral peptide **Mr(calc):** 2139.9048

Fixed modifications: Carbamidomethyl (C) (apply to specified residues or termini only)

Variable modifications:

N10 : Deamidated (NQ)

N14 : Deamidated (NQ)

Ions Score: 104 Expect: 2.5e-009

Matches : 36/206 fragment ions using 51 most intense peaks ([help](#))

| #  | b         | b <sup>++</sup> | b <sup>*</sup> | b <sup>*++</sup> | b <sup>0</sup> | b <sup>0++</sup> | Seq. | y         | y <sup>++</sup> | y <sup>*</sup> | y <sup>*++</sup> | y <sup>0</sup> | y <sup>0++</sup> | #  |
|----|-----------|-----------------|----------------|------------------|----------------|------------------|------|-----------|-----------------|----------------|------------------|----------------|------------------|----|
| 1  | 114.0913  | 57.5493         |                |                  |                |                  | L    |           |                 |                |                  |                |                  | 20 |
| 2  | 215.1390  | 108.0731        |                |                  | 197.1285       | 99.0679          | T    | 2027.8281 | 1014.4177       | 2010.8015      | 1005.9044        | 2009.8175      | 1005.4124        | 19 |
| 3  | 330.1660  | 165.5866        |                |                  | 312.1554       | 156.5813         | D    | 1926.7804 | 963.8938        | 1909.7538      | 955.3806         | 1908.7698      | 954.8886         | 18 |
| 4  | 431.2136  | 216.1105        |                |                  | 413.2031       | 207.1052         | T    | 1811.7535 | 906.3804        | 1794.7269      | 897.8671         | 1793.7429      | 897.3751         | 17 |
| 5  | 544.2977  | 272.6525        |                |                  | 526.2871       | 263.6472         | I    | 1710.7058 | 855.8565        | 1693.6792      | 847.3433         | 1692.6952      | 846.8512         | 16 |
| 6  | 704.3284  | 352.6678        |                |                  | 686.3178       | 343.6625         | C    | 1597.6217 | 799.3145        | 1580.5952      | 790.8012         | 1579.6111      | 790.3092         | 15 |
| 7  | 761.3498  | 381.1785        |                |                  | 743.3393       | 372.1733         | G    | 1437.5911 | 719.2992        | 1420.5645      | 710.7859         | 1419.5805      | 710.2939         | 14 |
| 8  | 860.4182  | 430.7128        |                |                  | 842.4077       | 421.7075         | V    | 1380.5696 | 690.7884        | 1363.5431      | 682.2752         | 1362.5590      | 681.7832         | 13 |
| 9  | 917.4397  | 459.2235        |                |                  | 899.4291       | 450.2182         | G    | 1281.5012 | 641.2542        | 1264.4746      | 632.7410         | 1263.4906      | 632.2489         | 12 |
| 10 | 1032.4666 | 516.7370        | 1015.4401      | 508.2237         | 1014.4561      | 507.7317         | N    | 1224.4797 | 612.7435        | 1207.4532      | 604.2302         | 1206.4692      | 603.7382         | 11 |
| 11 | 1163.5071 | 582.2572        | 1146.4806      | 573.7439         | 1145.4966      | 573.2519         | M    | 1109.4528 | 555.2300        | 1092.4262      | 546.7168         | 1091.4422      | 546.2247         | 10 |
| 12 | 1250.5392 | 625.7732        | 1233.5126      | 617.2599         | 1232.5286      | 616.7679         | S    | 978.4123  | 489.7098        | 961.3857       | 481.1965         | 960.4017       | 480.7045         | 9  |
| 13 | 1321.5763 | 661.2918        | 1304.5497      | 652.7785         | 1303.5657      | 652.2865         | A    | 891.3803  | 446.1938        | 874.3537       | 437.6805         | 873.3697       | 437.1885         | 8  |
| 14 | 1436.6032 | 718.8052        | 1419.5767      | 710.2920         | 1418.5926      | 709.8000         | N    | 820.3432  | 410.6752        | 803.3166       | 402.1619         | 802.3326       | 401.6699         | 7  |
| 15 | 1507.6403 | 754.3238        | 1490.6138      | 745.8105         | 1489.6298      | 745.3185         | A    | 705.3162  | 353.1617        | 688.2897       | 344.6485         | 687.3056       | 344.1565         | 6  |
| 16 | 1594.6724 | 797.8398        | 1577.6458      | 789.3265         | 1576.6618      | 788.8345         | S    | 634.2791  | 317.6432        | 617.2525       | 309.1299         | 616.2685       | 308.6379         | 5  |
| 17 | 1709.6993 | 855.3533        | 1692.6727      | 846.8400         | 1691.6887      | 846.3480         | D    | 547.2471  | 274.1272        | 530.2205       | 265.6139         | 529.2365       | 265.1219         | 4  |
| 18 | 1837.7579 | 919.3826        | 1820.7313      | 910.8693         | 1819.7473      | 910.3773         | Q    | 432.2201  | 216.6137        | 415.1936       | 208.1004         | 414.2096       | 207.6084         | 3  |
| 19 | 1966.8005 | 983.9039        | 1949.7739      | 975.3906         | 1948.7899      | 974.8986         | E    | 304.1615  | 152.5844        | 287.1350       | 144.0711         | 286.1510       | 143.5791         | 2  |
| 20 |           |                 |                |                  |                |                  | R    | 175.1190  | 88.0631         | 158.0924       | 79.5498          |                |                  | 1  |

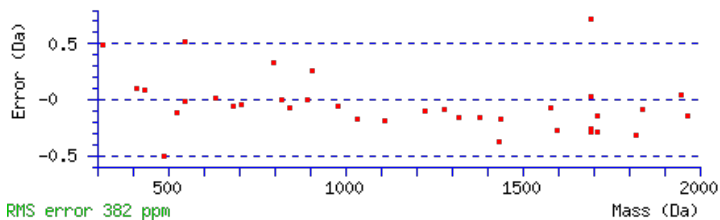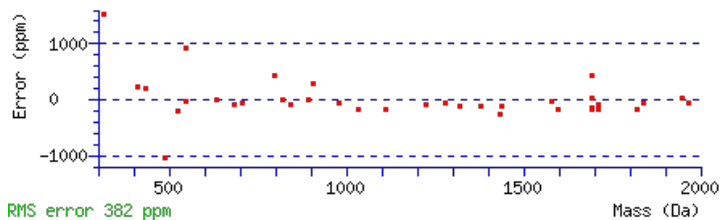

NCBI BLAST search of [LTDTICGVGNMSANASDQER](#)

(Parameters: blastp, nr protein database, expect=20000, no filter, PAM30)

Other BLAST [web gateways](#)

**All matches to this query**

| Score | Mr(calcd) | Delta   | Sequence                             | Site Analysis              |
|-------|-----------|---------|--------------------------------------|----------------------------|
| 104.1 | 2139.9048 | 0.0091  | <a href="#">LTDTICGVGNMSANASDQER</a> | Deamidated N10, N14 99.44% |
| 81.4  | 2139.9048 | 0.0091  | <a href="#">LTDTICGVGNMSANASDQER</a> | Deamidated N10, Q18 0.53%  |
| 69.5  | 2139.9048 | 0.0091  | <a href="#">LTDTICGVGNMSANASDQER</a> | Deamidated N14, Q18 0.03%  |
| 42.4  | 2138.9208 | 0.9931  | <a href="#">LTDTICGVGNMSANASDQER</a> |                            |
| 23.4  | 2138.9208 | 0.9931  | <a href="#">LTDTICGVGNMSANASDQER</a> |                            |
| 22.4  | 2138.9208 | 0.9931  | <a href="#">LTDTICGVGNMSANASDQER</a> |                            |
| 1.5   | 2139.9167 | -0.0028 | <a href="#">DSGDGYGSHTLCAYNLGEPK</a> |                            |
| 1.2   | 2139.9201 | -0.0062 | <a href="#">DLSCNSDPVAVASCFVER</a>   |                            |
| 0.9   | 2139.9208 | -0.0069 | <a href="#">CDEVRCTGNNTSPGMAGRR</a>  |                            |

Mascot: <http://www.matrixscience.com/>

# MASCOT SCIENCE Mascot Search Results

## Peptide View

MS/MS Fragmentation of **SPYYNVSDSEISFHICYDGYTLR**

Found in **B4E1Z4** in **con\_Xuniprot\_HUMAN3**, B4E1Z4\_HUMAN Complement factor B OS=Homo sapiens GN=CFB PE=2 SV=1

Match to Query 21973: 2586.106288 from(1294.060420,2+) intensity(42161.5117) rtinseconds(2080) scans(4958) index(16891)

Title: 111019\_Est\_ML\_YP\_G\_06Spectrum4103\_scans\_\_4958

Data file C:\mascot\20140703\_Tmgf\_1D\CSV\_UseAnalysis\MasterCSV\All\_Glyco\mgf\ptm\UC18ERLIC\_PTM\_35D.mgf

Click mouse within plot area to zoom in by factor of two about that point

Or,  to  Da

Label all possible matches  Label matches used for scoring

Show Y-axis

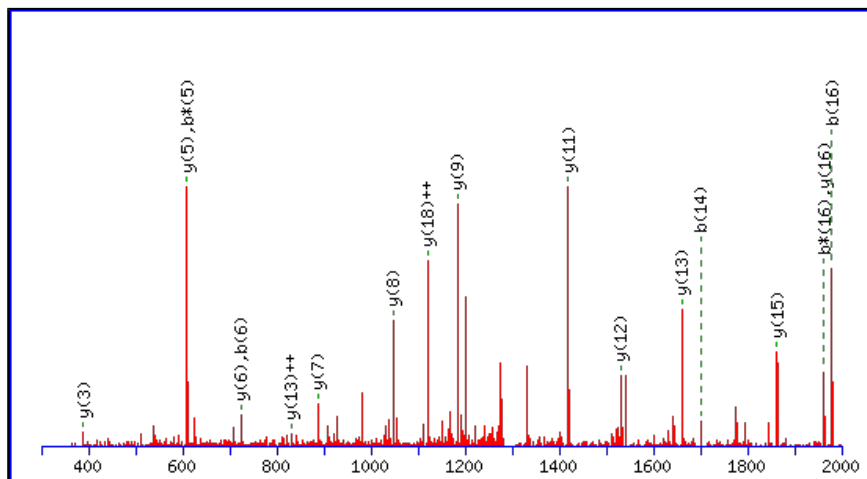

Monoisotopic mass of neutral peptide Mr(calc): 2586.1009

Fixed modifications: Carbamidomethyl (C) (apply to specified residues or termini only)

Variable modifications:

N5 : Deamidated (NQ)

Ions Score: 100 Expect: 6.7e-009

Matches : 18/228 fragment ions using 17 most intense peaks ([help](#))

| #  | b         | b <sup>++</sup> | b*        | b <sup>*++</sup> | b <sup>0</sup> | b <sup>0++</sup> | Seq. | y         | y <sup>++</sup> | y*        | y <sup>*++</sup> | y <sup>0</sup> | y <sup>0++</sup> | #  |
|----|-----------|-----------------|-----------|------------------|----------------|------------------|------|-----------|-----------------|-----------|------------------|----------------|------------------|----|
| 1  | 88.0393   | 44.5233         |           |                  | 70.0287        | 35.5180          | S    |           |                 |           |                  |                |                  | 21 |
| 2  | 185.0921  | 93.0497         |           |                  | 167.0815       | 84.0444          | P    | 2500.0762 | 1250.5417       | 2483.0496 | 1242.0284        | 2482.0656      | 1241.5364        | 20 |
| 3  | 348.1554  | 174.5813        |           |                  | 330.1448       | 165.5761         | Y    | 2403.0234 | 1202.0153       | 2385.9969 | 1193.5021        | 2385.0128      | 1193.0101        | 19 |
| 4  | 511.2187  | 256.1130        |           |                  | 493.2082       | 247.1077         | Y    | 2239.9601 | 1120.4837       | 2222.9335 | 1111.9704        | 2221.9495      | 1111.4784        | 18 |
| 5  | 626.2457  | 313.6265        | 609.2191  | 305.1132         | 608.2351       | 304.6212         | N    | 2076.8967 | 1038.9520       | 2059.8702 | 1030.4387        | 2058.8862      | 1029.9467        | 17 |
| 6  | 725.3141  | 363.1607        | 708.2875  | 354.6474         | 707.3035       | 354.1554         | V    | 1961.8698 | 981.4385        | 1944.8433 | 972.9253         | 1943.8592      | 972.4333         | 16 |
| 7  | 812.3461  | 406.6767        | 795.3196  | 398.1634         | 794.3355       | 397.6714         | S    | 1862.8014 | 931.9043        | 1845.7748 | 923.3911         | 1844.7908      | 922.8991         | 15 |
| 8  | 927.3731  | 464.1902        | 910.3465  | 455.6769         | 909.3625       | 455.1849         | D    | 1775.7694 | 888.3883        | 1758.7428 | 879.8750         | 1757.7588      | 879.3830         | 14 |
| 9  | 1056.4156 | 528.7115        | 1039.3891 | 520.1982         | 1038.4051      | 519.7062         | E    | 1660.7424 | 830.8748        | 1643.7159 | 822.3616         | 1642.7319      | 821.8696         | 13 |
| 10 | 1169.4997 | 585.2535        | 1152.4732 | 576.7402         | 1151.4891      | 576.2482         | I    | 1531.6998 | 766.3536        | 1514.6733 | 757.8403         | 1513.6893      | 757.3483         | 12 |
| 11 | 1256.5317 | 628.7695        | 1239.5052 | 620.2562         | 1238.5212      | 619.7642         | S    | 1418.6158 | 709.8115        | 1401.5892 | 701.2982         | 1400.6052      | 700.8062         | 11 |
| 12 | 1403.6002 | 702.3037        | 1386.5736 | 693.7904         | 1385.5896      | 693.2984         | F    | 1331.5837 | 666.2955        | 1314.5572 | 657.7822         | 1313.5732      | 657.2902         | 10 |
| 13 | 1540.6591 | 770.8332        | 1523.6325 | 762.3199         | 1522.6485      | 761.8279         | H    | 1184.5153 | 592.7613        | 1167.4888 | 584.2480         | 1166.5048      | 583.7560         | 9  |
| 14 | 1700.6897 | 850.8485        | 1683.6632 | 842.3352         | 1682.6791      | 841.8432         | C    | 1047.4564 | 524.2318        | 1030.4299 | 515.7186         | 1029.4458      | 515.2266         | 8  |
| 15 | 1863.7530 | 932.3802        | 1846.7265 | 923.8669         | 1845.7425      | 923.3749         | Y    | 887.4258  | 444.2165        | 870.3992  | 435.7032         | 869.4152       | 435.2112         | 7  |
| 16 | 1978.7800 | 989.8936        | 1961.7534 | 981.3804         | 1960.7694      | 980.8883         | D    | 724.3624  | 362.6849        | 707.3359  | 354.1716         | 706.3519       | 353.6796         | 6  |
| 17 | 2035.8015 | 1018.4044       | 2018.7749 | 1009.8911        | 2017.7909      | 1009.3991        | G    | 609.3355  | 305.1714        | 592.3089  | 296.6581         | 591.3249       | 296.1661         | 5  |
| 18 | 2198.8648 | 1099.9360       | 2181.8382 | 1091.4228        | 2180.8542      | 1090.9307        | Y    | 552.3140  | 276.6607        | 535.2875  | 268.1474         | 534.3035       | 267.6554         | 4  |
| 19 | 2299.9125 | 1150.4599       | 2282.8859 | 1141.9466        | 2281.9019      | 1141.4546        | T    | 389.2507  | 195.1290        | 372.2241  | 186.6157         | 371.2401       | 186.1237         | 3  |
| 20 | 2412.9965 | 1207.0019       | 2395.9700 | 1198.4886        | 2394.9860      | 1197.9966        | L    | 288.2030  | 144.6051        | 271.1765  | 136.0919         |                |                  | 2  |
| 21 |           |                 |           |                  |                |                  | R    | 175.1190  | 88.0631         | 158.0924  | 79.5498          |                |                  | 1  |



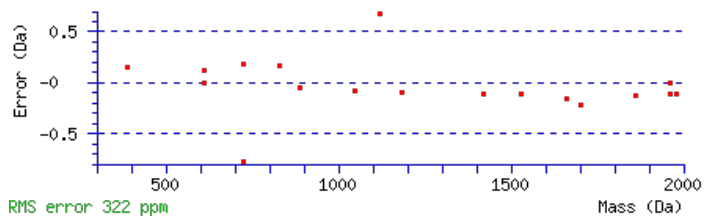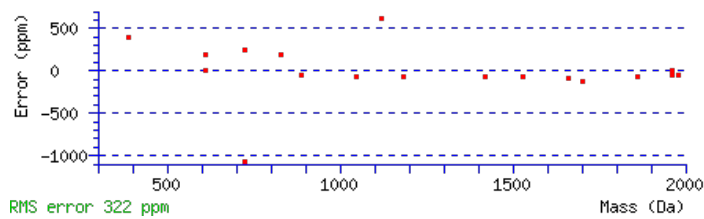

NCBI BLAST search of [SPYYNVSDEISFHICYDGYTLR](#)  
 (Parameters: blastp, nr protein database, expect=20000, no filter, PAM30)  
 Other BLAST [web gateways](#)

All matches to this query

| Score | Mr(calc)  | Delta   | Sequence                               |
|-------|-----------|---------|----------------------------------------|
| 99.7  | 2586.1009 | 0.0054  | <a href="#">SPYYNVSDEISFHICYDGYTLR</a> |
| 2.3   | 2584.0886 | 2.0177  | <a href="#">ESKMSDWVNCNEDDYGAFLLR</a>  |
| 1.9   | 2586.1093 | -0.0030 | <a href="#">ENTYTDNLDSTEELERGDDIQK</a> |
| 0.2   | 2586.1141 | -0.0078 | <a href="#">VOSTTENFMQYMKQFNSQNLK</a>  |

Mascot: <http://www.matrixscience.com/>

# MASCOT SCIENCE Mascot Search Results

## Peptide View

MS/MS Fragmentation of **LTDITICGVGNMSANASDQER**

Found in **B4DQI1** in **con\_Xuniprot\_HUMAN3**, B4DQI1\_HUMAN Complement C2b fragment OS=Homo sapiens GN=C2 PE=2 SV=1

Match to Query 14432: 2155.920508 from(1078.967530,2+) intensity(19694.9141) rtinseconds(788) scans(1716) index(25990)

Title: 111019\_Est\_MI\_YS\_G\_08Spectrum1471\_scans\_1716

Data file C:\mascot\20140703\_Tmgf\_1D\CSV\_UseAnalysis\MasterCSV\All\_Glyco\mgf\ptm\UC18ERLIC\_PTM\_35D.mgf

Click mouse within plot area to zoom in by factor of two about that point

Or, to Da

Label all possible matches Label matches used for scoring

Show Y-axis

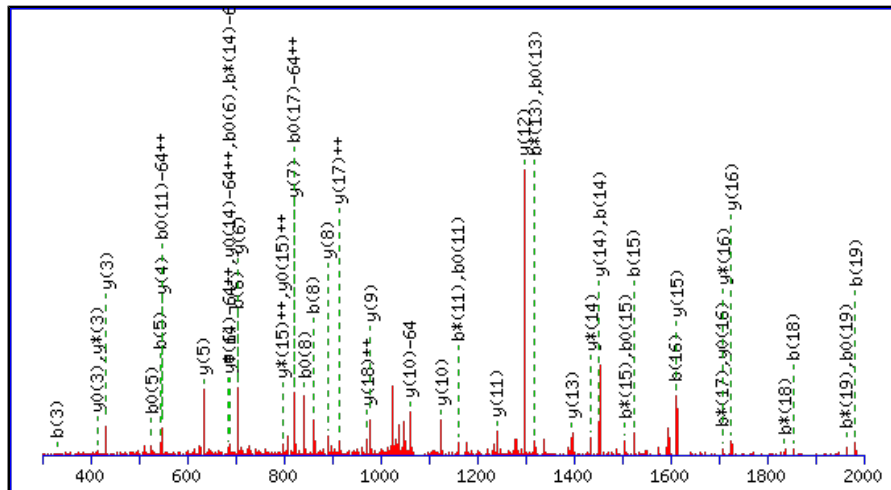

Monoisotopic mass of neutral peptide **Mr(calc):** 2154.9158

Fixed modifications: Carbamidomethyl (C) (apply to specified residues or termini only)

Variable modifications:

M11 : Oxidation (M), with neutral losses 0.0000(shown in table), 63.9983

N14 : Deamidated (NQ)

Ions Score: 74 Expect: 2.7e-006

Matches : 52/320 fragment ions using 85 most intense peaks ([help](#))

| #  | b                | b <sup>++</sup> | b <sup>*</sup>   | b <sup>*++</sup> | b <sup>0</sup>   | b <sup>0++</sup> | Seq. | y                | y <sup>++</sup> | y <sup>*</sup>   | y <sup>*++</sup> | y <sup>0</sup>   | y <sup>0++</sup> | #  |
|----|------------------|-----------------|------------------|------------------|------------------|------------------|------|------------------|-----------------|------------------|------------------|------------------|------------------|----|
| 1  | 114.0913         | 57.5493         |                  |                  |                  |                  | L    |                  |                 |                  |                  |                  |                  | 20 |
| 2  | 215.1390         | 108.0731        |                  |                  | 197.1285         | 99.0679          | T    | 2042.8390        | 1021.9231       | 2025.8124        | 1013.4099        | 2024.8284        | 1012.9178        | 19 |
| 3  | <b>330.1660</b>  | 165.5866        |                  |                  | 312.1554         | 156.5813         | D    | 1941.7913        | <b>971.3993</b> | 1924.7647        | 962.8860         | 1923.7807        | 962.3940         | 18 |
| 4  | 431.2136         | 216.1105        |                  |                  | 413.2031         | 207.1052         | T    | 1826.7644        | <b>913.8858</b> | 1809.7378        | 905.3725         | 1808.7538        | 904.8805         | 17 |
| 5  | <b>544.2977</b>  | 272.6525        |                  |                  | <b>526.2871</b>  | 263.6472         | I    | <b>1725.7167</b> | 863.3620        | <b>1708.6901</b> | 854.8487         | <b>1707.7061</b> | 854.3567         | 16 |
| 6  | <b>704.3284</b>  | 352.6678        |                  |                  | <b>686.3178</b>  | 343.6625         | C    | <b>1612.6326</b> | 806.8199        | 1595.6061        | <b>798.3067</b>  | 1594.6220        | <b>797.8147</b>  | 15 |
| 7  | 761.3498         | 381.1785        |                  |                  | 743.3393         | 372.1733         | G    | <b>1452.6020</b> | 726.8046        | <b>1435.5754</b> | 718.2913         | 1434.5914        | 717.7993         | 14 |
| 8  | <b>860.4182</b>  | 430.7128        |                  |                  | <b>842.4077</b>  | 421.7075         | V    | <b>1395.5805</b> | 698.2939        | 1378.5539        | 689.7806         | 1377.5699        | 689.2886         | 13 |
| 9  | 917.4397         | 459.2235        |                  |                  | 899.4291         | 450.2182         | G    | <b>1296.5121</b> | 648.7597        | 1279.4855        | 640.2464         | 1278.5015        | 639.7544         | 12 |
| 10 | 1031.4826        | 516.2449        | 1014.4561        | 507.7317         | 1013.4721        | 507.2397         | N    | <b>1239.4906</b> | 620.2489        | 1222.4641        | 611.7357         | 1221.4801        | 611.2437         | 11 |
| 11 | 1178.5180        | 589.7626        | <b>1161.4915</b> | 581.2494         | <b>1160.5075</b> | 580.7574         | M    | <b>1125.4477</b> | 563.2275        | 1108.4211        | 554.7142         | 1107.4371        | 554.2222         | 10 |
| 12 | 1265.5501        | 633.2787        | 1248.5235        | 624.7654         | 1247.5395        | 624.2734         | S    | <b>978.4123</b>  | 489.7098        | 961.3857         | 481.1965         | 960.4017         | 480.7045         | 9  |
| 13 | 1336.5872        | 668.7972        | <b>1319.5606</b> | 660.2839         | <b>1318.5766</b> | 659.7919         | A    | <b>891.3803</b>  | 446.1938        | 874.3537         | 437.6805         | 873.3697         | 437.1885         | 8  |
| 14 | <b>1451.6141</b> | 726.3107        | 1434.5876        | 717.7974         | 1433.6035        | 717.3054         | N    | <b>820.3432</b>  | 410.6752        | 803.3166         | 402.1619         | 802.3326         | 401.6699         | 7  |
| 15 | <b>1522.6512</b> | 761.8292        | <b>1505.6247</b> | 753.3160         | <b>1504.6407</b> | 752.8240         | A    | <b>705.3162</b>  | 353.1617        | 688.2897         | 344.6485         | <b>687.3056</b>  | 344.1565         | 6  |
| 16 | <b>1609.6833</b> | 805.3453        | 1592.6567        | 796.8320         | 1591.6727        | 796.3400         | S    | <b>634.2791</b>  | 317.6432        | 617.2525         | 309.1299         | 616.2685         | 308.6379         | 5  |
| 17 | 1724.7102        | 862.8587        | <b>1707.6836</b> | 854.3455         | 1706.6996        | 853.8535         | D    | <b>547.2471</b>  | 274.1272        | 530.2205         | 265.6139         | 529.2365         | 265.1219         | 4  |
| 18 | <b>1852.7688</b> | 926.8880        | <b>1835.7422</b> | 918.3747         | 1834.7582        | 917.8827         | Q    | <b>432.2201</b>  | 216.6137        | <b>415.1936</b>  | 208.1004         | <b>414.2096</b>  | 207.6084         | 3  |
| 19 | <b>1981.8114</b> | 991.4093        | <b>1964.7848</b> | 982.8960         | <b>1963.8008</b> | 982.4040         | E    | 304.1615         | 152.5844        | 287.1350         | 144.0711         | 286.1510         | 143.5791         | 2  |
| 20 |                  |                 |                  |                  |                  |                  | R    | 175.1190         | 88.0631         | 158.0924         | 79.5498          |                  |                  | 1  |

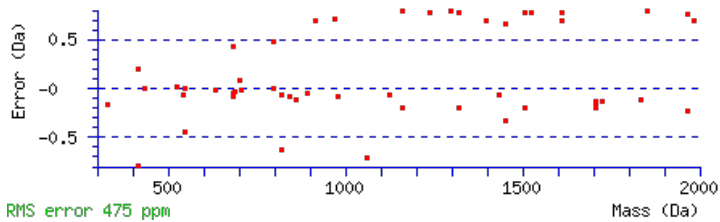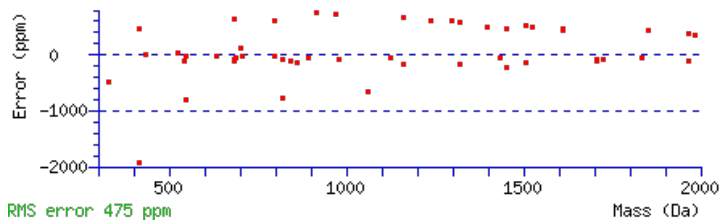

NCBI BLAST search of [LTDTICGVGNMSANASDQER](#)

(Parameters: blastp, nr protein database, expect=20000, no filter, PAM30)

Other BLAST [web gateways](#)

All matches to this query

| Score | Mr(calcd) | Delta  | Sequence                             | Site Analysis         |
|-------|-----------|--------|--------------------------------------|-----------------------|
| 74.0  | 2154.9158 | 1.0048 | <a href="#">LTDTICGVGNMSANASDQER</a> | Deamidated N14 71.74% |
| 69.8  | 2154.9158 | 1.0048 | <a href="#">LTDTICGVGNMSANASDQER</a> | Deamidated Q18 26.96% |
| 56.6  | 2154.9158 | 1.0048 | <a href="#">LTDTICGVGNMSANASDQER</a> | Deamidated N10 1.30%  |
| 4.4   | 2155.9141 | 0.0064 | <a href="#">EEEESVNASSEFGQNTNKER</a> |                       |
| 3.1   | 2155.9141 | 0.0064 | <a href="#">EEEESVNASSEFGQNTNKER</a> |                       |
| 1.6   | 2155.9188 | 0.0017 | <a href="#">ANMNSDSRHLGTSEVDHER</a>  |                       |
| 1.5   | 2155.9141 | 0.0064 | <a href="#">EEEESVNASSEFGQNTNKER</a> |                       |
| 0.9   | 2155.9110 | 0.0096 | <a href="#">QMEDEAKRSETMNAEQSR</a>   |                       |
| 0.6   | 2154.9270 | 0.9936 | <a href="#">KMASVNGSSQNCVSGQERGR</a> |                       |
| 0.6   | 2155.9150 | 0.0055 | <a href="#">DMSSEMLPGSSHITDSEQR</a>  |                       |

Mascot: <http://www.matrixscience.com/>

# MATRIX SCIENCE Mascot Search Results

## Peptide View

MS/MS Fragmentation of **ALHQVFEHMLDVSKLTDTCGVGNMSANASDQER**

Found in **B4DQI1** in **con\_Xuniprot\_HUMAN3**, B4DQI1\_HUMAN Complement C2b fragment OS=Homo sapiens GN=C2 PE=2 SV=1

Match to Query 28075: 3806.734096 from(952.690800,4+) intensity(68265.7891) rtinseconds(1718) scans(4502) index(23963)

Title: 111019\_Est\_MI\_YS\_G\_05Spectrum3897\_scans\_\_4502

Data file C:\mascot\20140703\_Tmgf\_1D\CSV\_UseAnalysis\MasterCSV\All\_Glyco\mgf\ptm\UC18ERLIC\_PTM\_35D.mgf

Click mouse within plot area to zoom in by factor of two about that point

Or, to Da

Label all possible matches Label matches used for scoring

Show Y-axis

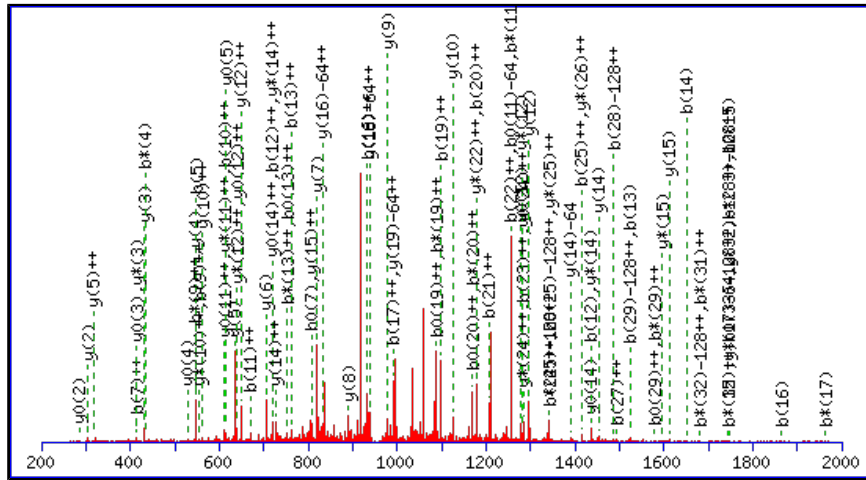

Monoisotopic mass of neutral peptide Mr(calc): 3806.7186

Fixed modifications: Carbamidomethyl (C) (apply to specified residues or termini only)

Variable modifications:

M9 : Oxidation (M), with neutral losses 0.0000(shown in table), 63.9983

N24 : Deamidated (NQ)

M25 : Oxidation (M), with neutral losses 0.0000(shown in table), 63.9983

N28 : Deamidated (NQ)

Ions Score: 66 Expect: 3.8e-005

Matches : 91/670 fragment ions using 137 most intense peaks (help)

| #  | b         | b <sup>++</sup> | b <sup>*</sup> | b <sup>*++</sup> | b <sup>0</sup> | b <sup>0++</sup> | Seq. | y         | y <sup>++</sup> | y <sup>*</sup> | y <sup>*++</sup> | y <sup>0</sup> | y <sup>0++</sup> | #  |
|----|-----------|-----------------|----------------|------------------|----------------|------------------|------|-----------|-----------------|----------------|------------------|----------------|------------------|----|
| 1  | 72.0444   | 36.5258         |                |                  |                |                  | A    |           |                 |                |                  |                |                  | 34 |
| 2  | 185.1285  | 93.0679         |                |                  |                |                  | L    | 3736.6888 | 1868.8480       | 3719.6622      | 1860.3347        | 3718.6782      | 1859.8427        | 33 |
| 3  | 322.1874  | 161.5973        |                |                  |                |                  | H    | 3623.6047 | 1812.3060       | 3606.5781      | 1803.7927        | 3605.5941      | 1803.3007        | 32 |
| 4  | 450.2459  | 225.6266        | 433.2194       | 217.1133         |                |                  | Q    | 3486.5458 | 1743.7765       | 3469.5192      | 1735.2633        | 3468.5352      | 1734.7712        | 31 |
| 5  | 549.3144  | 275.1608        | 532.2878       | 266.6475         |                |                  | V    | 3358.4872 | 1679.7472       | 3341.4607      | 1671.2340        | 3340.4766      | 1670.7420        | 30 |
| 6  | 696.3828  | 348.6950        | 679.3562       | 340.1817         |                |                  | F    | 3259.4188 | 1630.2130       | 3242.3922      | 1621.6998        | 3241.4082      | 1621.2077        | 29 |
| 7  | 825.4254  | 413.2163        | 808.3988       | 404.7030         | 807.4148       | 404.2110         | E    | 3112.3504 | 1556.6788       | 3095.3238      | 1548.1655        | 3094.3398      | 1547.6735        | 28 |
| 8  | 962.4843  | 481.7458        | 945.4577       | 473.2325         | 944.4737       | 472.7405         | H    | 2983.3078 | 1492.1575       | 2966.2812      | 1483.6443        | 2965.2972      | 1483.1522        | 27 |
| 9  | 1109.5197 | 555.2635        | 1092.4931      | 546.7502         | 1091.5091      | 546.2582         | M    | 2846.2489 | 1423.6281       | 2829.2223      | 1415.1148        | 2828.2383      | 1414.6228        | 26 |
| 10 | 1222.6037 | 611.8055        | 1205.5772      | 603.2922         | 1204.5932      | 602.8002         | L    | 2699.2135 | 1350.1104       | 2682.1869      | 1341.5971        | 2681.2029      | 1341.1051        | 25 |
| 11 | 1337.6307 | 669.3190        | 1320.6041      | 660.8057         | 1319.6201      | 660.3137         | D    | 2586.1294 | 1293.5683       | 2569.1029      | 1285.0551        | 2568.1188      | 1284.5631        | 24 |
| 12 | 1436.6991 | 718.8532        | 1419.6725      | 710.3399         | 1418.6885      | 709.8479         | V    | 2471.1025 | 1236.0549       | 2454.0759      | 1227.5416        | 2453.0919      | 1227.0496        | 23 |
| 13 | 1523.7311 | 762.3692        | 1506.7046      | 753.8559         | 1505.7206      | 753.3639         | S    | 2372.0340 | 1186.5207       | 2355.0075      | 1178.0074        | 2354.0235      | 1177.5154        | 22 |
| 14 | 1651.8261 | 826.4167        | 1634.7995      | 817.9034         | 1633.8155      | 817.4114         | K    | 2285.0020 | 1143.0046       | 2267.9755      | 1134.4914        | 2266.9915      | 1133.9994        | 21 |
| 15 | 1764.9102 | 882.9587        | 1747.8836      | 874.4454         | 1746.8996      | 873.9534         | L    | 2156.9071 | 1078.9572       | 2139.8805      | 1070.4439        | 2138.8965      | 1069.9519        | 20 |
| 16 | 1865.9578 | 933.4826        | 1848.9313      | 924.9693         | 1847.9473      | 924.4773         | T    | 2043.8230 | 1022.4151       | 2026.7964      | 1013.9019        | 2025.8124      | 1013.4099        | 19 |
| 17 | 1980.9848 | 990.9960        | 1963.9582      | 982.4828         | 1962.9742      | 981.9907         | D    | 1942.7753 | 971.8913        | 1925.7488      | 963.3780         | 1924.7647      | 962.8860         | 18 |
| 18 | 2082.0325 | 1041.5199       | 2065.0059      | 1033.0066        | 2064.0219      | 1032.5146        | T    | 1827.7484 | 914.3778        | 1810.7218      | 905.8645         | 1809.7378      | 905.3725         | 17 |
| 19 | 2195.1165 | 1098.0619       | 2178.0900      | 1089.5486        | 2177.1060      | 1089.0566        | I    | 1726.7007 | 863.8540        | 1709.6741      | 855.3407         | 1708.6901      | 854.8487         | 16 |
| 20 | 2355.1472 | 1178.0772       | 2338.1206      | 1169.5639        | 2337.1366      | 1169.0719        | C    | 1613.6166 | 807.3120        | 1596.5901      | 798.7987         | 1595.6061      | 798.3067         | 15 |
| 21 | 2412.1686 | 1206.5880       | 2395.1421      | 1198.0747        | 2394.1581      | 1197.5827        | G    | 1453.5860 | 727.2966        | 1436.5594      | 718.7834         | 1435.5754      | 718.2913         | 14 |

|    |           |                  |           |                  |           |                  |   |                  |                 |                  |                 |                  |                 |    |
|----|-----------|------------------|-----------|------------------|-----------|------------------|---|------------------|-----------------|------------------|-----------------|------------------|-----------------|----|
| 22 | 2511.2370 | <b>1256.1222</b> | 2494.2105 | 1247.6089        | 2493.2265 | 1247.1169        | V | 1396.5645        | 698.7859        | 1379.5380        | 690.2726        | 1378.5539        | 689.7806        | 13 |
| 23 | 2568.2585 | <b>1284.6329</b> | 2551.2320 | 1276.1196        | 2550.2479 | 1275.6276        | G | <b>1297.4961</b> | <b>649.2517</b> | <b>1280.4696</b> | <b>640.7384</b> | <b>1279.4855</b> | <b>640.2464</b> | 12 |
| 24 | 2683.2855 | <b>1342.1464</b> | 2666.2589 | 1333.6331        | 2665.2749 | 1333.1411        | N | 1240.4746        | 620.7410        | 1223.4481        | <b>612.2277</b> | 1222.4641        | <b>611.7357</b> | 11 |
| 25 | 2830.3209 | <b>1415.6641</b> | 2813.2943 | 1407.1508        | 2812.3103 | 1406.6588        | M | <b>1125.4477</b> | <b>563.2275</b> | 1108.4211        | <b>554.7142</b> | 1107.4371        | 554.2222        | 10 |
| 26 | 2917.3529 | 1459.1801        | 2900.3263 | 1450.6668        | 2899.3423 | 1450.1748        | S | <b>978.4123</b>  | 489.7098        | 961.3857         | 481.1965        | 960.4017         | 480.7045        | 9  |
| 27 | 2988.3900 | <b>1494.6986</b> | 2971.3634 | 1486.1854        | 2970.3794 | 1485.6934        | A | <b>891.3803</b>  | 446.1938        | 874.3537         | 437.6805        | 873.3697         | 437.1885        | 8  |
| 28 | 3103.4169 | 1552.2121        | 3086.3904 | 1543.6988        | 3085.4064 | 1543.2068        | N | <b>820.3432</b>  | 410.6752        | 803.3166         | 402.1619        | 802.3326         | 401.6699        | 7  |
| 29 | 3174.4541 | 1587.7307        | 3157.4275 | <b>1579.2174</b> | 3156.4435 | <b>1578.7254</b> | A | <b>705.3162</b>  | 353.1617        | 688.2897         | 344.6485        | 687.3056         | 344.1565        | 6  |
| 30 | 3261.4861 | 1631.2467        | 3244.4595 | 1622.7334        | 3243.4755 | 1622.2414        | S | <b>634.2791</b>  | <b>317.6432</b> | 617.2525         | 309.1299        | <b>616.2685</b>  | 308.6379        | 5  |
| 31 | 3376.5130 | 1688.7601        | 3359.4865 | <b>1680.2469</b> | 3358.5025 | 1679.7549        | D | <b>547.2471</b>  | 274.1272        | 530.2205         | 265.6139        | <b>529.2365</b>  | 265.1219        | 4  |
| 32 | 3504.5716 | 1752.7894        | 3487.5451 | <b>1744.2762</b> | 3486.5610 | 1743.7842        | Q | <b>432.2201</b>  | 216.6137        | <b>415.1936</b>  | 208.1004        | <b>414.2096</b>  | 207.6084        | 3  |
| 33 | 3633.6142 | 1817.3107        | 3616.5876 | 1808.7975        | 3615.6036 | 1808.3055        | E | <b>304.1615</b>  | 152.5844        | 287.1350         | 144.0711        | <b>286.1510</b>  | 143.5791        | 2  |
| 34 |           |                  |           |                  |           |                  | R | 175.1190         | 88.0631         | 158.0924         | 79.5498         |                  |                 | 1  |

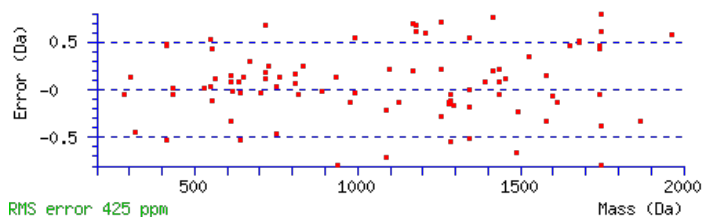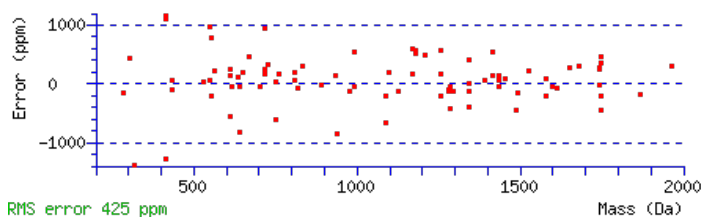

NCBI BLAST search of [ALHQVFEHMLDVSKLTDTCGVGNMSANASDQER](#)

(Parameters: blastp, nr protein database, expect=20000, no filter, PAM30)

Other BLAST [web gateways](#)

All matches to this query

| Score | Mr(calc)  | Delta  | Sequence                                          | Site Analysis              |
|-------|-----------|--------|---------------------------------------------------|----------------------------|
| 66.1  | 3806.7186 | 0.0155 | <a href="#">ALHQVFEHMLDVSKLTDTCGVGNMSANASDQER</a> | Deamidated N24, N28 71.64% |
| 60.9  | 3806.7186 | 0.0155 | <a href="#">ALHQVFEHMLDVSKLTDTCGVGNMSANASDQER</a> | Deamidated N24, Q32 21.54% |
| 58.5  | 3805.7346 | 0.9995 | <a href="#">ALHQVFEHMLDVSKLTDTCGVGNMSANASDQER</a> |                            |
| 54.2  | 3805.7346 | 0.9995 | <a href="#">ALHQVFEHMLDVSKLTDTCGVGNMSANASDQER</a> |                            |
| 53.7  | 3806.7186 | 0.0155 | <a href="#">ALHQVFEHMLDVSKLTDTCGVGNMSANASDQER</a> | Deamidated N28, Q32 4.06%  |
| 50.1  | 3806.7186 | 0.0155 | <a href="#">ALHQVFEHMLDVSKLTDTCGVGNMSANASDQER</a> | Deamidated Q4, N28 1.77%   |
| 50.1  | 3805.7346 | 0.9995 | <a href="#">ALHQVFEHMLDVSKLTDTCGVGNMSANASDQER</a> |                            |
| 45.4  | 3806.7186 | 0.0155 | <a href="#">ALHQVFEHMLDVSKLTDTCGVGNMSANASDQER</a> | Deamidated Q4, N24 0.60%   |
| 43.5  | 3806.7186 | 0.0155 | <a href="#">ALHQVFEHMLDVSKLTDTCGVGNMSANASDQER</a> | Deamidated Q4, Q32 0.39%   |
| 41.8  | 3805.7346 | 0.9995 | <a href="#">ALHQVFEHMLDVSKLTDTCGVGNMSANASDQER</a> |                            |

Mascot: <http://www.matrixscience.com/>

# Mascot Search Results

## Peptide View

MS/MS Fragmentation of **ALHQVFEHMLDVSKLTDTICGVGNMSANASDQER**

Found in **B4DQI1** in **con\_Xuniprot\_HUMAN3**, B4DQI1\_HUMAN Complement C2b fragment OS=Homo sapiens GN=C2 PE=2 SV=1

Match to Query 28067: 3790.733896 from(948.690750,4+) intensity(24578.5723) rtinseconds(2078) scans(5380) index(9682)

Title: 111019\_Est\_ISCardio\_NMI\_YS\_G\_5Spectrum4631\_scans\_\_5380

Data file C:\\mascot\\20140703\_Tmgf\_1D\\CSV\_UseAnalysis\\MasterCSV\\All\_Glyco\\mgf\\ptm\\UC18ERLIC\_PTM\_35D.mgf

Click mouse within plot area to zoom in by factor of two about that point

Or,  to  Da

Label all possible matches  Label matches used for scoring

Show Y-axis

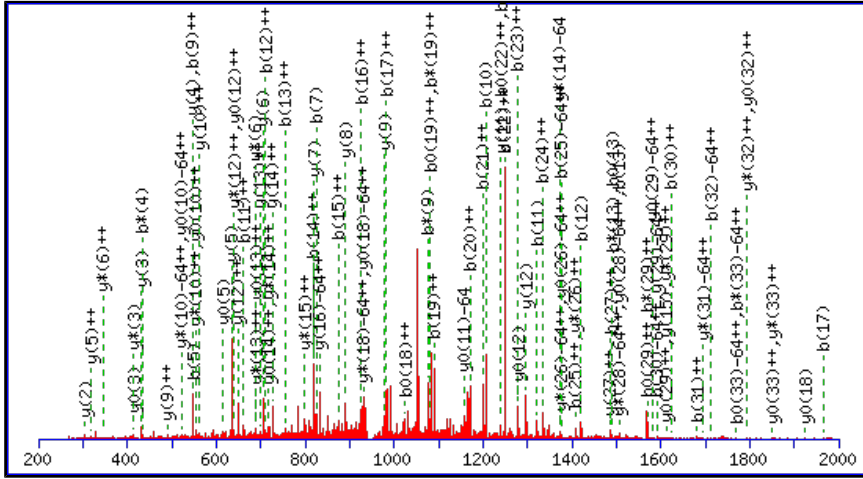

Monoisotopic mass of neutral peptide Mr(calc): 3790.7237

Fixed modifications: Carbamidomethyl (C) (apply to specified residues or termini only)

Variable modifications:

N24 : Deamidated (NQ)

M25 : Oxidation (M), with neutral losses 0.0000(shown in table), 63.9983

N28 : Deamidated (NQ)

Ions Score: 61 Expect: 0.00014

Matches : 96/574 fragment ions using 171 most intense peaks ([help](#))

| #  | b         | b <sup>++</sup> | b <sup>*</sup> | b <sup>*++</sup> | b <sup>0</sup> | b <sup>0++</sup> | Seq. | y         | y <sup>++</sup> | y <sup>*</sup> | y <sup>*++</sup> | y <sup>0</sup> | y <sup>0++</sup> | #  |
|----|-----------|-----------------|----------------|------------------|----------------|------------------|------|-----------|-----------------|----------------|------------------|----------------|------------------|----|
| 1  | 72.0444   | 36.5258         |                |                  |                |                  | A    |           |                 |                |                  |                |                  | 34 |
| 2  | 185.1285  | 93.0679         |                |                  |                |                  | L    | 3720.6938 | 1860.8506       | 3703.6673      | 1852.3373        | 3702.6833      | 1851.8453        | 33 |
| 3  | 322.1874  | 161.5973        |                |                  |                |                  | H    | 3607.6098 | 1804.3085       | 3590.5832      | 1795.7953        | 3589.5992      | 1795.3032        | 32 |
| 4  | 450.2459  | 225.6266        | 433.2194       | 217.1133         |                |                  | Q    | 3470.5509 | 1735.7791       | 3453.5243      | 1727.2658        | 3452.5403      | 1726.7738        | 31 |
| 5  | 549.3144  | 275.1608        | 532.2878       | 266.6475         |                |                  | V    | 3342.4923 | 1671.7498       | 3325.4657      | 1663.2365        | 3324.4817      | 1662.7445        | 30 |
| 6  | 696.3828  | 348.6950        | 679.3562       | 340.1817         |                |                  | F    | 3243.4239 | 1622.2156       | 3226.3973      | 1613.7023        | 3225.4133      | 1613.2103        | 29 |
| 7  | 825.4254  | 413.2163        | 808.3988       | 404.7030         | 807.4148       | 404.2110         | E    | 3096.3555 | 1548.6814       | 3079.3289      | 1540.1681        | 3078.3449      | 1539.6761        | 28 |
| 8  | 962.4843  | 481.7458        | 945.4577       | 473.2325         | 944.4737       | 472.7405         | H    | 2967.3129 | 1484.1601       | 2950.2863      | 1475.6468        | 2949.3023      | 1475.1548        | 27 |
| 9  | 1093.5248 | 547.2660        | 1076.4982      | 538.7527         | 1075.5142      | 538.2607         | M    | 2830.2540 | 1415.6306       | 2813.2274      | 1407.1173        | 2812.2434      | 1406.6253        | 26 |
| 10 | 1206.6088 | 603.8081        | 1189.5823      | 595.2948         | 1188.5983      | 594.8028         | L    | 2699.2135 | 1350.1104       | 2682.1869      | 1341.5971        | 2681.2029      | 1341.1051        | 25 |
| 11 | 1321.6358 | 661.3215        | 1304.6092      | 652.8082         | 1303.6252      | 652.3162         | D    | 2586.1294 | 1293.5683       | 2569.1029      | 1285.0551        | 2568.1188      | 1284.5631        | 24 |
| 12 | 1420.7042 | 710.8557        | 1403.6776      | 702.3425         | 1402.6936      | 701.8504         | V    | 2471.1025 | 1236.0549       | 2454.0759      | 1227.5416        | 2453.0919      | 1227.0496        | 23 |
| 13 | 1507.7362 | 754.3717        | 1490.7097      | 745.8585         | 1489.7256      | 745.3665         | S    | 2372.0340 | 1186.5207       | 2355.0075      | 1178.0074        | 2354.0235      | 1177.5154        | 22 |
| 14 | 1635.8312 | 818.4192        | 1618.8046      | 809.9060         | 1617.8206      | 809.4139         | K    | 2285.0020 | 1143.0046       | 2267.9755      | 1134.4914        | 2266.9915      | 1133.9994        | 21 |
| 15 | 1748.9152 | 874.9613        | 1731.8887      | 866.4480         | 1730.9047      | 865.9560         | L    | 2156.9071 | 1078.9572       | 2139.8805      | 1070.4439        | 2138.8965      | 1069.9519        | 20 |
| 16 | 1849.9629 | 925.4851        | 1832.9364      | 916.9718         | 1831.9524      | 916.4798         | T    | 2043.8230 | 1022.4151       | 2026.7964      | 1013.9019        | 2025.8124      | 1013.4099        | 19 |
| 17 | 1964.9899 | 982.9986        | 1947.9633      | 974.4853         | 1946.9793      | 973.9933         | D    | 1942.7753 | 971.8913        | 1925.7488      | 963.3780         | 1924.7647      | 962.8860         | 18 |
| 18 | 2066.0375 | 1033.5224       | 2049.0110      | 1025.0091        | 2048.0270      | 1024.5171        | T    | 1827.7484 | 914.3778        | 1810.7218      | 905.8645         | 1809.7378      | 905.3725         | 17 |
| 19 | 2179.1216 | 1090.0644       | 2162.0951      | 1081.5512        | 2161.1110      | 1081.0592        | I    | 1726.7007 | 863.8540        | 1709.6741      | 855.3407         | 1708.6901      | 854.8487         | 16 |
| 20 | 2339.1523 | 1170.0798       | 2322.1257      | 1161.5665        | 2321.1417      | 1161.0745        | C    | 1613.6166 | 807.3120        | 1596.5901      | 798.7987         | 1595.6061      | 798.3067         | 15 |
| 21 | 2396.1737 | 1198.5905       | 2379.1472      | 1190.0772        | 2378.1632      | 1189.5852        | G    | 1453.5860 | 727.2966        | 1436.5594      | 718.7834         | 1435.5754      | 718.2913         | 14 |
| 22 | 2495.2421 | 1248.1247       | 2478.2156      | 1239.6114        | 2477.2316      | 1239.1194        | V    | 1396.5645 | 698.7859        | 1379.5380      | 690.2726         | 1378.5539      | 689.7806         | 13 |



|    |           |                  |           |                  |           |                  |          |                  |                 |                 |                 |                  |                 |           |
|----|-----------|------------------|-----------|------------------|-----------|------------------|----------|------------------|-----------------|-----------------|-----------------|------------------|-----------------|-----------|
| 23 | 2552.2636 | <b>1276.6354</b> | 2535.2370 | 1268.1222        | 2534.2530 | 1267.6302        | <b>G</b> | <b>1297.4961</b> | <b>649.2517</b> | 1280.4696       | <b>640.7384</b> | <b>1279.4855</b> | <b>640.2464</b> | <b>12</b> |
| 24 | 2667.2905 | <b>1334.1489</b> | 2650.2640 | 1325.6356        | 2649.2800 | 1325.1436        | <b>N</b> | <b>1240.4746</b> | 620.7410        | 1223.4481       | 612.2277        | 1222.4641        | 611.7357        | <b>11</b> |
| 25 | 2814.3259 | <b>1407.6666</b> | 2797.2994 | 1399.1533        | 2796.3154 | 1398.6613        | <b>M</b> | 1125.4477        | <b>563.2275</b> | 1108.4211       | <b>554.7142</b> | 1107.4371        | <b>554.2222</b> | <b>10</b> |
| 26 | 2901.3580 | 1451.1826        | 2884.3314 | 1442.6693        | 2883.3474 | 1442.1773        | <b>S</b> | <b>978.4123</b>  | <b>489.7098</b> | 961.3857        | 481.1965        | 960.4017         | 480.7045        | <b>9</b>  |
| 27 | 2972.3951 | <b>1486.7012</b> | 2955.3685 | 1478.1879        | 2954.3845 | 1477.6959        | <b>A</b> | <b>891.3803</b>  | 446.1938        | 874.3537        | 437.6805        | 873.3697         | 437.1885        | <b>8</b>  |
| 28 | 3087.4220 | 1544.2146        | 3070.3955 | 1535.7014        | 3069.4115 | 1535.2094        | <b>N</b> | <b>820.3432</b>  | 410.6752        | 803.3166        | 402.1619        | 802.3326         | 401.6699        | <b>7</b>  |
| 29 | 3158.4591 | 1579.7332        | 3141.4326 | <b>1571.2199</b> | 3140.4486 | <b>1570.7279</b> | <b>A</b> | <b>705.3162</b>  | 353.1617        | <b>688.2897</b> | <b>344.6485</b> | 687.3056         | 344.1565        | <b>6</b>  |
| 30 | 3245.4912 | <b>1623.2492</b> | 3228.4646 | 1614.7359        | 3227.4806 | 1614.2439        | <b>S</b> | <b>634.2791</b>  | <b>317.6432</b> | 617.2525        | 309.1299        | <b>616.2685</b>  | 308.6379        | <b>5</b>  |
| 31 | 3360.5181 | <b>1680.7627</b> | 3343.4916 | 1672.2494        | 3342.5075 | 1671.7574        | <b>D</b> | <b>547.2471</b>  | 274.1272        | 530.2205        | 265.6139        | 529.2365         | 265.1219        | <b>4</b>  |
| 32 | 3488.5767 | 1744.7920        | 3471.5501 | 1736.2787        | 3470.5661 | 1735.7867        | <b>Q</b> | <b>432.2201</b>  | 216.6137        | <b>415.1936</b> | 208.1004        | <b>414.2096</b>  | 207.6084        | <b>3</b>  |
| 33 | 3617.6193 | 1809.3133        | 3600.5927 | 1800.8000        | 3599.6087 | 1800.3080        | <b>E</b> | <b>304.1615</b>  | 152.5844        | 287.1350        | 144.0711        | 286.1510         | 143.5791        | <b>2</b>  |
| 34 |           |                  |           |                  |           |                  | <b>R</b> | 175.1190         | 88.0631         | 158.0924        | 79.5498         |                  |                 | <b>1</b>  |

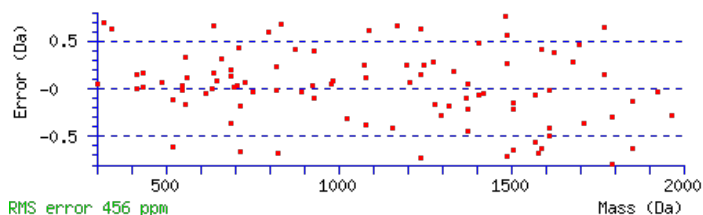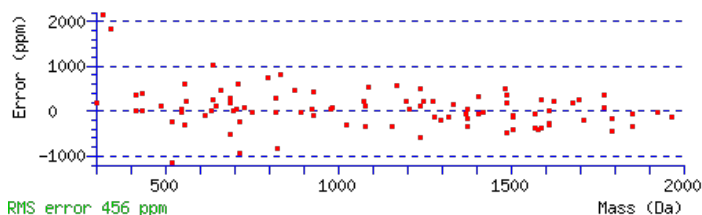

NCBI BLAST search of [ALHQVFEHMLDVSKLTDTCGVGNMSANASDQER](#)

(Parameters: blastp, nr protein database, expect=20000, no filter, PAM30)

Other BLAST [web gateways](#)

All matches to this query

| Score | Mr(calc)  | Delta  | Sequence                                          | Site Analysis                              |
|-------|-----------|--------|---------------------------------------------------|--------------------------------------------|
| 60.7  | 3790.7237 | 0.0102 | <a href="#">ALHQVFEHMLDVSKLTDTCGVGNMSANASDQER</a> | Deamidated N24, N28, Oxidation M25; 40.18% |
| 58.3  | 3790.7237 | 0.0102 | <a href="#">ALHQVFEHMLDVSKLTDTCGVGNMSANASDQER</a> | Deamidated N24, Q32, Oxidation M25; 23.23% |
| 56.7  | 3789.7397 | 0.9942 | <a href="#">ALHQVFEHMLDVSKLTDTCGVGNMSANASDQER</a> |                                            |
| 55.7  | 3790.7237 | 0.0102 | <a href="#">ALHQVFEHMLDVSKLTDTCGVGNMSANASDQER</a> | Deamidated Q4, N28, Oxidation M25; 12.71%  |
| 54.5  | 3790.7237 | 0.0102 | <a href="#">ALHQVFEHMLDVSKLTDTCGVGNMSANASDQER</a> | Deamidated Q4, Q32, Oxidation M25; 9.82%   |
| 52.9  | 3790.7237 | 0.0102 | <a href="#">ALHQVFEHMLDVSKLTDTCGVGNMSANASDQER</a> | Deamidated Q4, N24, Oxidation M25; 6.67%   |
| 52.5  | 3789.7397 | 0.9942 | <a href="#">ALHQVFEHMLDVSKLTDTCGVGNMSANASDQER</a> |                                            |
| 52.4  | 3789.7397 | 0.9942 | <a href="#">ALHQVFEHMLDVSKLTDTCGVGNMSANASDQER</a> |                                            |
| 50.1  | 3790.7237 | 0.0102 | <a href="#">ALHQVFEHMLDVSKLTDTCGVGNMSANASDQER</a> | Deamidated N28, Q32, Oxidation M25; 3.52%  |
| 43.7  | 3789.7397 | 0.9942 | <a href="#">ALHQVFEHMLDVSKLTDTCGVGNMSANASDQER</a> |                                            |

Mascot: <http://www.matrixscience.com/>



# MASCOT SCIENCE Mascot Search Results

## Peptide View

MS/MS Fragmentation of **ALHQVFEHMLDVSKLTDTCGVGNMSANASDQER**

Found in **B4DQI1** in **con\_Xuniprot\_HUMAN3**, B4DQI1\_HUMAN Complement C2b fragment OS=Homo sapiens GN=C2 PE=2 SV=1

Match to Query 28065: 3774.733176 from(944.690570,4+) intensity(14278.2158) rtinseconds(2307) scans(5716) index(9118)

Title: 111019\_Est\_ISCardio\_NMI\_YS\_G\_4Spectrum4928\_scans\_\_5716

Data file C:\mascot\20140703\_Tmgf\_1D\CSV\_UseAnalysis\MasterCSV\All\_Glyco\mgf\ptm\UC18ERLIC\_PTM\_35D.mgf

Click mouse within plot area to zoom in by factor of two about that point

Or,  to  Da

Label all possible matches  Label matches used for scoring

Show Y-axis

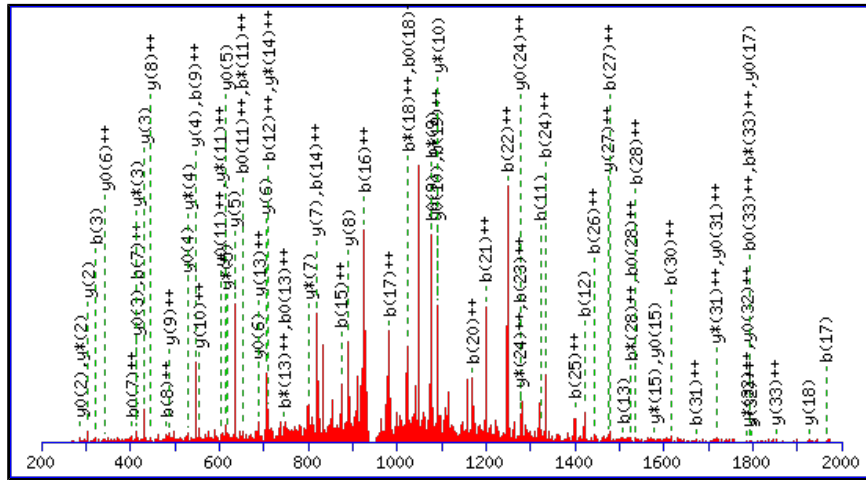

Monoisotopic mass of neutral peptide Mr(calc): 3774.7287

Fixed modifications: Carbamidomethyl (C) (apply to specified residues or termini only)

Variable modifications:

Q4 : Deamidated (NQ)

N24 : Deamidated (NQ)

Ions Score: 58 Expect: 0.00028

Matches : 78/376 fragment ions using 172 most intense peaks ([help](#))

| #  | b         | b <sup>++</sup> | b <sup>*</sup> | b <sup>*++</sup> | b <sup>0</sup> | b <sup>0++</sup> | Seq. | y         | y <sup>++</sup> | y <sup>*</sup> | y <sup>*++</sup> | y <sup>0</sup> | y <sup>0++</sup> | #  |
|----|-----------|-----------------|----------------|------------------|----------------|------------------|------|-----------|-----------------|----------------|------------------|----------------|------------------|----|
| 1  | 72.0444   | 36.5258         |                |                  |                |                  | A    |           |                 |                |                  |                |                  | 34 |
| 2  | 185.1285  | 93.0679         |                |                  |                |                  | L    | 3704.6989 | 1852.8531       | 3687.6724      | 1844.3398        | 3686.6884      | 1843.8478        | 33 |
| 3  | 322.1874  | 161.5973        |                |                  |                |                  | H    | 3591.6149 | 1796.3111       | 3574.5883      | 1787.7978        | 3573.6043      | 1787.3058        | 32 |
| 4  | 451.2300  | 226.1186        | 434.2034       | 217.6053         |                |                  | Q    | 3454.5559 | 1727.7816       | 3437.5294      | 1719.2683        | 3436.5454      | 1718.7763        | 31 |
| 5  | 550.2984  | 275.6528        | 533.2718       | 267.1396         |                |                  | V    | 3325.5134 | 1663.2603       | 3308.4868      | 1654.7470        | 3307.5028      | 1654.2550        | 30 |
| 6  | 697.3668  | 349.1870        | 680.3402       | 340.6738         |                |                  | F    | 3226.4449 | 1613.7261       | 3209.4184      | 1605.2128        | 3208.4344      | 1604.7208        | 29 |
| 7  | 826.4094  | 413.7083        | 809.3828       | 405.1951         | 808.3988       | 404.7030         | E    | 3079.3765 | 1540.1919       | 3062.3500      | 1531.6786        | 3061.3660      | 1531.1866        | 28 |
| 8  | 963.4683  | 482.2378        | 946.4417       | 473.7245         | 945.4577       | 473.2325         | H    | 2950.3339 | 1475.6706       | 2933.3074      | 1467.1573        | 2932.3234      | 1466.6653        | 27 |
| 9  | 1094.5088 | 547.7580        | 1077.4822      | 539.2448         | 1076.4982      | 538.7527         | M    | 2813.2750 | 1407.1411       | 2796.2485      | 1398.6279        | 2795.2645      | 1398.1359        | 26 |
| 10 | 1207.5928 | 604.3001        | 1190.5663      | 595.7868         | 1189.5823      | 595.2948         | L    | 2682.2345 | 1341.6209       | 2665.2080      | 1333.1076        | 2664.2240      | 1332.6156        | 25 |
| 11 | 1322.6198 | 661.8135        | 1305.5932      | 653.3003         | 1304.6092      | 652.8082         | D    | 2569.1505 | 1285.0789       | 2552.1239      | 1276.5656        | 2551.1399      | 1276.0736        | 24 |
| 12 | 1421.6882 | 711.3477        | 1404.6617      | 702.8345         | 1403.6776      | 702.3425         | V    | 2454.1235 | 1227.5654       | 2437.0970      | 1219.0521        | 2436.1130      | 1218.5601        | 23 |
| 13 | 1508.7202 | 754.8638        | 1491.6937      | 746.3505         | 1490.7097      | 745.8585         | S    | 2355.0551 | 1178.0312       | 2338.0286      | 1169.5179        | 2337.0446      | 1169.0259        | 22 |
| 14 | 1636.8152 | 818.9112        | 1619.7886      | 810.3980         | 1618.8046      | 809.9060         | K    | 2268.0231 | 1134.5152       | 2250.9965      | 1126.0019        | 2250.0125      | 1125.5099        | 21 |
| 15 | 1749.8993 | 875.4533        | 1732.8727      | 866.9400         | 1731.8887      | 866.4480         | L    | 2139.9281 | 1070.4677       | 2122.9016      | 1061.9544        | 2121.9176      | 1061.4624        | 20 |
| 16 | 1850.9469 | 925.9771        | 1833.9204      | 917.4638         | 1832.9364      | 916.9718         | T    | 2026.8441 | 1013.9257       | 2009.8175      | 1005.4124        | 2008.8335      | 1004.9204        | 19 |
| 17 | 1965.9739 | 983.4906        | 1948.9473      | 974.9773         | 1947.9633      | 974.4853         | D    | 1925.7964 | 963.4018        | 1908.7698      | 954.8886         | 1907.7858      | 954.3965         | 18 |
| 18 | 2067.0216 | 1034.0144       | 2049.9950      | 1025.5011        | 2049.0110      | 1025.0091        | T    | 1810.7694 | 905.8884        | 1793.7429      | 897.3751         | 1792.7589      | 896.8831         | 17 |
| 19 | 2180.1056 | 1090.5564       | 2163.0791      | 1082.0432        | 2162.0951      | 1081.5512        | I    | 1709.7218 | 855.3645        | 1692.6952      | 846.8512         | 1691.7112      | 846.3592         | 16 |
| 20 | 2340.1363 | 1170.5718       | 2323.1097      | 1162.0585        | 2322.1257      | 1161.5665        | C    | 1596.6377 | 798.8225        | 1579.6111      | 790.3092         | 1578.6271      | 789.8172         | 15 |
| 21 | 2397.1577 | 1199.0825       | 2380.1312      | 1190.5692        | 2379.1472      | 1190.0772        | G    | 1436.6070 | 718.8072        | 1419.5805      | 710.2939         | 1418.5965      | 709.8019         | 14 |
| 22 | 2496.2261 | 1248.6167       | 2479.1996      | 1240.1034        | 2478.2156      | 1239.6114        | V    | 1379.5856 | 690.2964        | 1362.5590      | 681.7832         | 1361.5750      | 681.2911         | 13 |

|    |           |                  |           |                  |           |                  |   |                 |                 |                  |                 |                  |                 |    |
|----|-----------|------------------|-----------|------------------|-----------|------------------|---|-----------------|-----------------|------------------|-----------------|------------------|-----------------|----|
| 23 | 2553.2476 | <b>1277.1274</b> | 2536.2211 | 1268.6142        | 2535.2370 | 1268.1222        | G | 1280.5172       | 640.7622        | 1263.4906        | 632.2489        | 1262.5066        | 631.7569        | 12 |
| 24 | 2668.2746 | <b>1334.6409</b> | 2651.2480 | 1326.1276        | 2650.2640 | 1325.6356        | N | 1223.4957       | 612.2515        | 1206.4692        | <b>603.7382</b> | 1205.4851        | <b>603.2462</b> | 11 |
| 25 | 2799.3150 | <b>1400.1612</b> | 2782.2885 | 1391.6479        | 2781.3045 | 1391.1559        | M | 1108.4688       | <b>554.7380</b> | <b>1091.4422</b> | 546.2247        | <b>1090.4582</b> | 545.7327        | 10 |
| 26 | 2886.3471 | <b>1443.6772</b> | 2869.3205 | 1435.1639        | 2868.3365 | 1434.6719        | S | 977.4283        | <b>489.2178</b> | 960.4017         | 480.7045        | 959.4177         | 480.2125        | 9  |
| 27 | 2957.3842 | <b>1479.1957</b> | 2940.3576 | 1470.6825        | 2939.3736 | 1470.1904        | A | <b>890.3962</b> | <b>445.7018</b> | 873.3697         | 437.1885        | 872.3857         | 436.6965        | 8  |
| 28 | 3071.4271 | <b>1536.2172</b> | 3054.4006 | <b>1527.7039</b> | 3053.4165 | <b>1527.2119</b> | N | <b>819.3591</b> | 410.1832        | <b>802.3326</b>  | 401.6699        | 801.3486         | 401.1779        | 7  |
| 29 | 3142.4642 | 1571.7357        | 3125.4377 | 1563.2225        | 3124.4537 | 1562.7305        | A | <b>705.3162</b> | 353.1617        | 688.2897         | 344.6485        | <b>687.3056</b>  | <b>344.1565</b> | 6  |
| 30 | 3229.4962 | <b>1615.2518</b> | 3212.4697 | 1606.7385        | 3211.4857 | 1606.2465        | S | <b>634.2791</b> | 317.6432        | <b>617.2525</b>  | 309.1299        | <b>616.2685</b>  | 308.6379        | 5  |
| 31 | 3344.5232 | <b>1672.7652</b> | 3327.4966 | 1664.2520        | 3326.5126 | 1663.7600        | D | <b>547.2471</b> | 274.1272        | <b>530.2205</b>  | 265.6139        | <b>529.2365</b>  | 265.1219        | 4  |
| 32 | 3472.5818 | 1736.7945        | 3455.5552 | 1728.2812        | 3454.5712 | 1727.7892        | Q | <b>432.2201</b> | 216.6137        | <b>415.1936</b>  | 208.1004        | <b>414.2096</b>  | 207.6084        | 3  |
| 33 | 3601.6244 | 1801.3158        | 3584.5978 | <b>1792.8025</b> | 3583.6138 | <b>1792.3105</b> | E | <b>304.1615</b> | 152.5844        | <b>287.1350</b>  | 144.0711        | <b>286.1510</b>  | 143.5791        | 2  |
| 34 |           |                  |           |                  |           |                  | R | 175.1190        | 88.0631         | 158.0924         | 79.5498         |                  |                 | 1  |

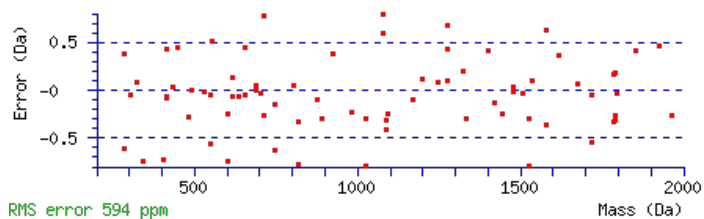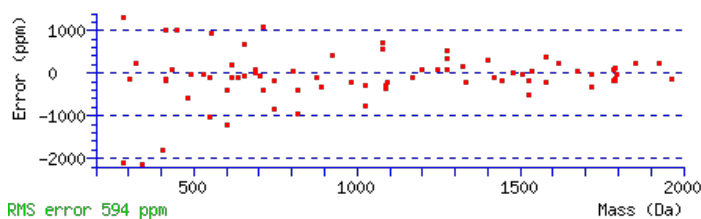

NCBI BLAST search of [ALHQVFEHMLDVSKLTDTICGVGNMSANASDQER](#)

(Parameters: blastp, nr protein database, expect=20000, no filter, PAM30)

Other BLAST [web gateways](#)

All matches to this query

| Score | Mr(calc)  | Delta  | Sequence                                           | Site Analysis              |
|-------|-----------|--------|----------------------------------------------------|----------------------------|
| 58.0  | 3774.7287 | 0.0044 | <a href="#">ALHQVFEHMLDVSKLTDTICGVGNMSANASDQER</a> | Deamidated Q4, N24 40.80%  |
| 57.4  | 3774.7287 | 0.0044 | <a href="#">ALHQVFEHMLDVSKLTDTICGVGNMSANASDQER</a> | Deamidated Q4, N28 35.62%  |
| 54.4  | 3774.7287 | 0.0044 | <a href="#">ALHQVFEHMLDVSKLTDTICGVGNMSANASDQER</a> | Deamidated N24, N28 17.85% |
| 49.0  | 3773.7447 | 0.9884 | <a href="#">ALHQVFEHMLDVSKLTDTICGVGNMSANASDQER</a> |                            |
| 47.2  | 3774.7287 | 0.0044 | <a href="#">ALHQVFEHMLDVSKLTDTICGVGNMSANASDQER</a> | Deamidated Q4, Q32 3.44%   |
| 45.2  | 3774.7287 | 0.0044 | <a href="#">ALHQVFEHMLDVSKLTDTICGVGNMSANASDQER</a> | Deamidated N24, Q32 2.14%  |
| 42.3  | 3773.7447 | 0.9884 | <a href="#">ALHQVFEHMLDVSKLTDTICGVGNMSANASDQER</a> |                            |
| 38.1  | 3773.7447 | 0.9884 | <a href="#">ALHQVFEHMLDVSKLTDTICGVGNMSANASDQER</a> |                            |
| 33.8  | 3774.7287 | 0.0044 | <a href="#">ALHQVFEHMLDVSKLTDTICGVGNMSANASDQER</a> | Deamidated N28, Q32 0.16%  |
| 31.8  | 3773.7447 | 0.9884 | <a href="#">ALHQVFEHMLDVSKLTDTICGVGNMSANASDQER</a> |                            |

Mascot: <http://www.matrixscience.com/>

# MASCOT SCIENCE Mascot Search Results

## Peptide View

MS/MS Fragmentation of **ALHQVFEHMLDVSKLTDTCGVGNMSANASDQER**

Found in **B4DQI1** in **con\_Xuniprot\_HUMAN3**, B4DQI1\_HUMAN Complement C2b fragment OS=Homo sapiens GN=C2 PE=2 SV=1

Match to Query 28071: 3792.743176 from(949.193070,4+) intensity(21352.9277) rtinseconds(2181) scans(5361) index(9085)

Title: 111019\_Est\_ISCardio\_NMI\_YS\_G\_4Spectrum4616\_scans\_\_5361

Data file C:\mascot\20140703\_Tmgf\_1D\CSV\_UseAnalysis\MasterCSV\All\_Glyco\mgf\ptm\UC18ERLIC\_PTM\_35D.mgf

Click mouse within plot area to zoom in by factor of two about that point

Or, to Da

Label all possible matches Label matches used for scoring

Show Y-axis

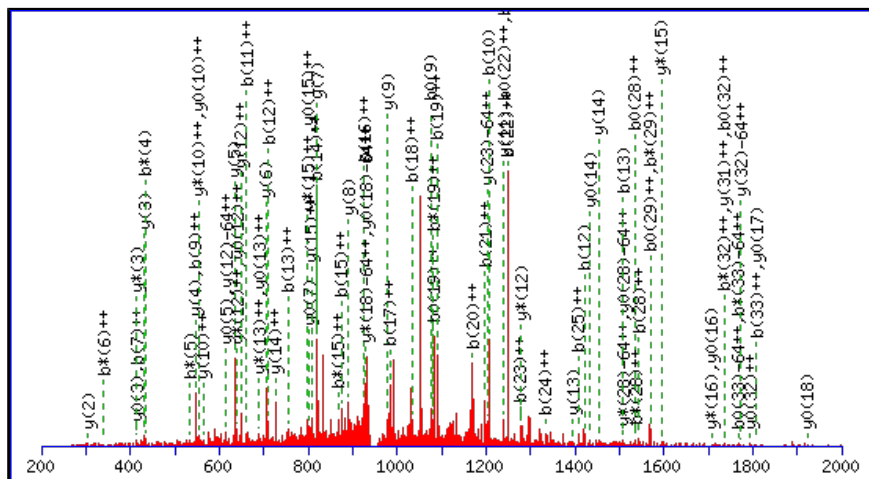

Monoisotopic mass of neutral peptide Mr(calc): 3790.7237

Fixed modifications: Carbamidomethyl (C) (apply to specified residues or termini only)

Variable modifications:

Q4 : Deamidated (NQ)

M25 : Oxidation (M), with neutral losses 0.0000(shown in table), 63.9983

N28 : Deamidated (NQ)

Ions Score: 53 Expect: 0.00087

Matches : 82/574 fragment ions using 172 most intense peaks ([help](#))

| #  | b         | b <sup>++</sup> | b <sup>*</sup> | b <sup>*++</sup> | b <sup>0</sup> | b <sup>0++</sup> | Seq. | y         | y <sup>++</sup> | y <sup>*</sup> | y <sup>*++</sup> | y <sup>0</sup> | y <sup>0++</sup> | #  |
|----|-----------|-----------------|----------------|------------------|----------------|------------------|------|-----------|-----------------|----------------|------------------|----------------|------------------|----|
| 1  | 72.0444   | 36.5258         |                |                  |                |                  | A    |           |                 |                |                  |                |                  | 34 |
| 2  | 185.1285  | 93.0679         |                |                  |                |                  | L    | 3720.6938 | 1860.8506       | 3703.6673      | 1852.3373        | 3702.6833      | 1851.8453        | 33 |
| 3  | 322.1874  | 161.5973        |                |                  |                |                  | H    | 3607.6098 | 1804.3085       | 3590.5832      | 1795.7953        | 3589.5992      | 1795.3032        | 32 |
| 4  | 451.2300  | 226.1186        | 434.2034       | 217.6053         |                |                  | Q    | 3470.5509 | 1735.7791       | 3453.5243      | 1727.2658        | 3452.5403      | 1726.7738        | 31 |
| 5  | 550.2984  | 275.6528        | 533.2718       | 267.1396         |                |                  | V    | 3341.5083 | 1671.2578       | 3324.4817      | 1662.7445        | 3323.4977      | 1662.2525        | 30 |
| 6  | 697.3668  | 349.1870        | 680.3402       | 340.6738         |                |                  | F    | 3242.4399 | 1621.7236       | 3225.4133      | 1613.2103        | 3224.4293      | 1612.7183        | 29 |
| 7  | 826.4094  | 413.7083        | 809.3828       | 405.1951         | 808.3988       | 404.7030         | E    | 3095.3714 | 1548.1894       | 3078.3449      | 1539.6761        | 3077.3609      | 1539.1841        | 28 |
| 8  | 963.4683  | 482.2378        | 946.4417       | 473.7245         | 945.4577       | 473.2325         | H    | 2966.3288 | 1483.6681       | 2949.3023      | 1475.1548        | 2948.3183      | 1474.6628        | 27 |
| 9  | 1094.5088 | 547.7580        | 1077.4822      | 539.2448         | 1076.4982      | 538.7527         | M    | 2829.2699 | 1415.1386       | 2812.2434      | 1406.6253        | 2811.2594      | 1406.1333        | 26 |
| 10 | 1207.5928 | 604.3001        | 1190.5663      | 595.7868         | 1189.5823      | 595.2948         | L    | 2698.2295 | 1349.6184       | 2681.2029      | 1341.1051        | 2680.2189      | 1340.6131        | 25 |
| 11 | 1322.6198 | 661.8135        | 1305.5932      | 653.3003         | 1304.6092      | 652.8082         | D    | 2585.1454 | 1293.0763       | 2568.1188      | 1284.5631        | 2567.1348      | 1284.0710        | 24 |
| 12 | 1421.6882 | 711.3477        | 1404.6617      | 702.8345         | 1403.6776      | 702.3425         | V    | 2470.1184 | 1235.5629       | 2453.0919      | 1227.0496        | 2452.1079      | 1226.5576        | 23 |
| 13 | 1508.7202 | 754.8638        | 1491.6937      | 746.3505         | 1490.7097      | 745.8585         | S    | 2371.0500 | 1186.0287       | 2354.0235      | 1177.5154        | 2353.0395      | 1177.0234        | 22 |
| 14 | 1636.8152 | 818.9112        | 1619.7886      | 810.3980         | 1618.8046      | 809.9060         | K    | 2284.0180 | 1142.5126       | 2266.9915      | 1133.9994        | 2266.0074      | 1133.5074        | 21 |
| 15 | 1749.8993 | 875.4533        | 1732.8727      | 866.9400         | 1731.8887      | 866.4480         | L    | 2155.9230 | 1078.4652       | 2138.8965      | 1069.9519        | 2137.9125      | 1069.4599        | 20 |
| 16 | 1850.9469 | 925.9771        | 1833.9204      | 917.4638         | 1832.9364      | 916.9718         | T    | 2042.8390 | 1021.9231       | 2025.8124      | 1013.4099        | 2024.8284      | 1012.9178        | 19 |
| 17 | 1965.9739 | 983.4906        | 1948.9473      | 974.9773         | 1947.9633      | 974.4853         | D    | 1941.7913 | 971.3993        | 1924.7647      | 962.8860         | 1923.7807      | 962.3940         | 18 |
| 18 | 2067.0216 | 1034.0144       | 2049.9950      | 1025.5011        | 2049.0110      | 1025.0091        | T    | 1826.7644 | 913.8858        | 1809.7378      | 905.3725         | 1808.7538      | 904.8805         | 17 |
| 19 | 2180.1056 | 1090.5564       | 2163.0791      | 1082.0432        | 2162.0951      | 1081.5512        | I    | 1725.7167 | 863.3620        | 1708.6901      | 854.8487         | 1707.7061      | 854.3567         | 16 |
| 20 | 2340.1363 | 1170.5718       | 2323.1097      | 1162.0585        | 2322.1257      | 1161.5665        | C    | 1612.6326 | 806.8199        | 1595.6061      | 798.3067         | 1594.6220      | 797.8147         | 15 |
| 21 | 2397.1577 | 1199.0825       | 2380.1312      | 1190.5692        | 2379.1472      | 1190.0772        | G    | 1452.6020 | 726.8046        | 1435.5754      | 718.2913         | 1434.5914      | 717.7993         | 14 |
| 22 | 2496.2261 | 1248.6167       | 2479.1996      | 1240.1034        | 2478.2156      | 1239.6114        | V    | 1395.5805 | 698.2939        | 1378.5539      | 689.7806         | 1377.5699      | 689.2886         | 13 |

|    |           |                  |           |                  |           |                  |   |                  |                 |                  |                 |                 |                 |    |
|----|-----------|------------------|-----------|------------------|-----------|------------------|---|------------------|-----------------|------------------|-----------------|-----------------|-----------------|----|
| 23 | 2553.2476 | <b>1277.1274</b> | 2536.2211 | 1268.6142        | 2535.2370 | 1268.1222        | G | 1296.5121        | <b>648.7597</b> | <b>1279.4855</b> | <b>640.2464</b> | 1278.5015       | <b>639.7544</b> | 12 |
| 24 | 2667.2905 | <b>1334.1489</b> | 2650.2640 | 1325.6356        | 2649.2800 | 1325.1436        | N | <b>1239.4906</b> | 620.2489        | 1222.4641        | 611.7357        | 1221.4801       | 611.2437        | 11 |
| 25 | 2814.3259 | <b>1407.6666</b> | 2797.2994 | 1399.1533        | 2796.3154 | 1398.6613        | M | 1125.4477        | <b>563.2275</b> | 1108.4211        | <b>554.7142</b> | 1107.4371       | <b>554.2222</b> | 10 |
| 26 | 2901.3580 | 1451.1826        | 2884.3314 | 1442.6693        | 2883.3474 | 1442.1773        | S | <b>978.4123</b>  | 489.7098        | 961.3857         | 481.1965        | 960.4017        | 480.7045        | 9  |
| 27 | 2972.3951 | 1486.7012        | 2955.3685 | 1478.1879        | 2954.3845 | 1477.6959        | A | <b>891.3803</b>  | 446.1938        | 874.3537         | 437.6805        | 873.3697        | 437.1885        | 8  |
| 28 | 3087.4220 | <b>1544.2146</b> | 3070.3955 | <b>1535.7014</b> | 3069.4115 | <b>1535.2094</b> | N | <b>820.3432</b>  | 410.6752        | 803.3166         | 402.1619        | <b>802.3326</b> | 401.6699        | 7  |
| 29 | 3158.4591 | 1579.7332        | 3141.4326 | <b>1571.2199</b> | 3140.4486 | <b>1570.7279</b> | A | <b>705.3162</b>  | 353.1617        | 688.2897         | 344.6485        | 687.3056        | 344.1565        | 6  |
| 30 | 3245.4912 | 1623.2492        | 3228.4646 | 1614.7359        | 3227.4806 | 1614.2439        | S | <b>634.2791</b>  | 317.6432        | 617.2525         | 309.1299        | <b>616.2685</b> | 308.6379        | 5  |
| 31 | 3360.5181 | 1680.7627        | 3343.4916 | 1672.2494        | 3342.5075 | 1671.7574        | D | <b>547.2471</b>  | 274.1272        | 530.2205         | 265.6139        | 529.2365        | 265.1219        | 4  |
| 32 | 3488.5767 | 1744.7920        | 3471.5501 | <b>1736.2787</b> | 3470.5661 | <b>1735.7867</b> | Q | <b>432.2201</b>  | 216.6137        | <b>415.1936</b>  | 208.1004        | <b>414.2096</b> | 207.6084        | 3  |
| 33 | 3617.6193 | <b>1809.3133</b> | 3600.5927 | 1800.8000        | 3599.6087 | 1800.3080        | E | <b>304.1615</b>  | 152.5844        | 287.1350         | 144.0711        | 286.1510        | 143.5791        | 2  |
| 34 |           |                  |           |                  |           |                  | R | 175.1190         | 88.0631         | 158.0924         | 79.5498         |                 |                 | 1  |

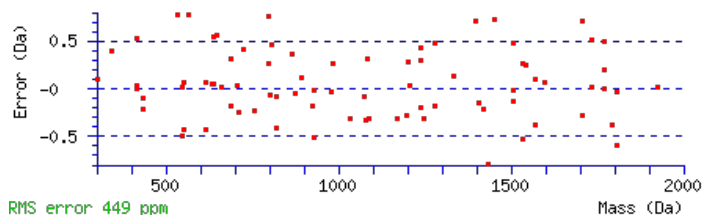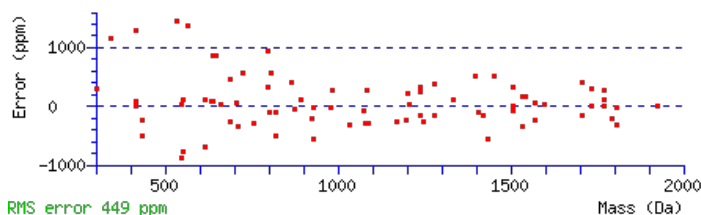

NCBI BLAST search of [ALHQVFEHMLDVSKLTDTCGVGNMSANASDQER](#)

(Parameters: blastp, nr protein database, expect=20000, no filter, PAM30)

Other BLAST [web gateways](#)

All matches to this query

| Score | Mr(calc)  | Delta  | Sequence                                               | Site Analysis                             |
|-------|-----------|--------|--------------------------------------------------------|-------------------------------------------|
| 53.1  | 3790.7237 | 2.0195 | <a href="#">ALHQVFEHMLDVSKLTDTCGVGNMSANASDQER</a>      | Deamidated Q4, N28, Oxidation M25; 32.59% |
| 52.9  | 3790.7237 | 2.0195 | <a href="#">ALHQVFEHMLDVSKLTDTCGVGNMSANASDQER</a>      | Deamidated Q4, Q32, Oxidation M25; 30.91% |
| 52.2  | 3790.7237 | 2.0195 | <a href="#">ALHQVFEHMLDVSKLTDTCGVGNMSANASDQER</a>      | Deamidated Q4, N24, Oxidation M25; 26.25% |
| 45.5  | 3790.7237 | 2.0195 | <a href="#">ALHQVFEHMLDVSKLTDTCGVGNMSANASDQER</a>      | Deamidated N24, Q32, Oxidation M25; 5.66% |
| 43.4  | 3790.7237 | 2.0195 | <a href="#">ALHQVFEHMLDVSKLTDTCGVGNMSANASDQER</a>      | Deamidated N24, N28, Oxidation M25; 3.51% |
| 38.3  | 3790.7237 | 2.0195 | <a href="#">ALHQVFEHMLDVSKLTDTCGVGNMSANASDQER</a>      | Deamidated N28, Q32, Oxidation M25; 1.07% |
| 16.8  | 3790.7237 | 2.0195 | <a href="#">ALHQVFEHMLDVSKLTDTCGVGNMSANASDQER</a>      | Deamidated N24, N28, Oxidation M9; 0.01%  |
| 15.6  | 3790.7237 | 2.0195 | <a href="#">ALHQVFEHMLDVSKLTDTCGVGNMSANASDQER</a>      | Deamidated Q4, N28, Oxidation M9; 0.01%   |
| 6.1   | 3790.7316 | 2.0116 | <a href="#">GTEGRTGLPGNQGEPSKGPQGDSEMGPFPGMAGLFGPK</a> |                                           |
| 5.3   | 3790.7237 | 2.0195 | <a href="#">ALHQVFEHMLDVSKLTDTCGVGNMSANASDQER</a>      | Deamidated Q4, Q32, Oxidation M9; 0.00%   |

Mascot: <http://www.matrixscience.com/>

# MATRIX SCIENCE Mascot Search Results

## Peptide View

MS/MS Fragmentation of **ALHQVFEHMLDVSKLTDITCGVGNMSANASDQER**

Found in **B4DQI1** in **con\_Xuniprot\_HUMAN3**, B4DQI1\_HUMAN Complement C2b fragment OS=Homo sapiens GN=C2 PE=2 SV=1

Match to Query 28068: 3790.739096 from(948.692050,4+) intensity(22131.1035) rtinseconds(2175) scans(5344) index(9082)

Title: 111019\_Est\_ISCardio\_NMI\_YS\_G\_4Spectrum4600\_scans\_\_5344

Data file C:\mascot\20140703\_Tmgf\_1D\CSV\_UseAnalysis\MasterCSV\All\_Glyco\mgf\ptm\UC18ERLIC\_PTM\_35D.mgf

Click mouse within plot area to zoom in by factor of two about that point

Or, to Da

Label all possible matches Label matches used for scoring

Show Y-axis

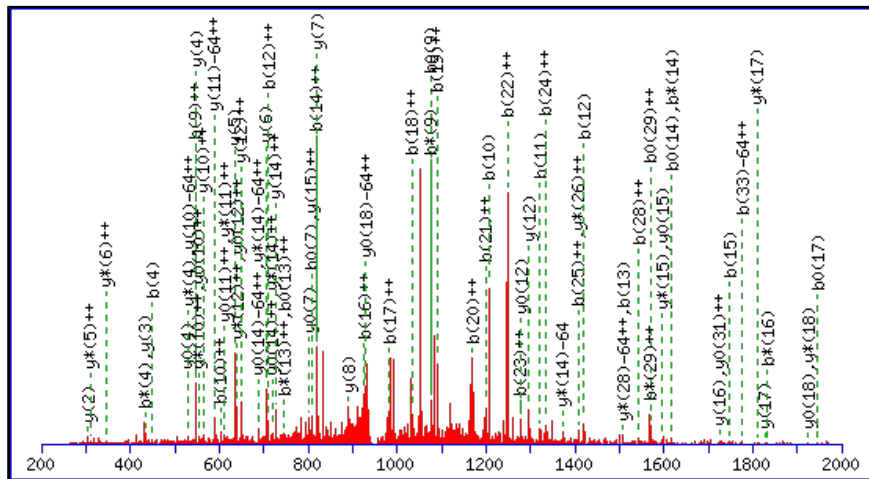

Monoisotopic mass of neutral peptide Mr(calc): 3790.7237

Fixed modifications: Carbamidomethyl (C) (apply to specified residues or termini only)

Variable modifications:

N24 : Deamidated (NQ)

M25 : Oxidation (M), with neutral losses 0.0000(shown in table), 63.9983

Q32 : Deamidated (NQ)

Ions Score: 51 Expect: 0.0015

Matches : 76/574 fragment ions using 138 most intense peaks ([help](#))

| #  | b                | b <sup>++</sup>  | b <sup>*</sup>   | b <sup>*++</sup> | b <sup>0</sup>   | b <sup>0++</sup> | Seq. | y                | y <sup>++</sup> | y <sup>*</sup>   | y <sup>*++</sup> | y <sup>0</sup>   | y <sup>0++</sup> | #  |
|----|------------------|------------------|------------------|------------------|------------------|------------------|------|------------------|-----------------|------------------|------------------|------------------|------------------|----|
| 1  | 72.0444          | 36.5258          |                  |                  |                  |                  | A    |                  |                 |                  |                  |                  |                  | 34 |
| 2  | 185.1285         | 93.0679          |                  |                  |                  |                  | L    | 3720.6938        | 1860.8506       | 3703.6673        | 1852.3373        | 3702.6833        | 1851.8453        | 33 |
| 3  | 322.1874         | 161.5973         |                  |                  |                  |                  | H    | 3607.6098        | 1804.3085       | 3590.5832        | 1795.7953        | 3589.5992        | 1795.3032        | 32 |
| 4  | <b>450.2459</b>  | 225.6266         | <b>433.2194</b>  | 217.1133         |                  |                  | Q    | 3470.5509        | 1735.7791       | 3453.5243        | 1727.2658        | 3452.5403        | <b>1726.7738</b> | 31 |
| 5  | 549.3144         | 275.1608         | 532.2878         | 266.6475         |                  |                  | V    | 3342.4923        | 1671.7498       | 3325.4657        | 1663.2365        | 3324.4817        | 1662.7445        | 30 |
| 6  | 696.3828         | 348.6950         | 679.3562         | 340.1817         |                  |                  | F    | 3243.4239        | 1622.2156       | 3226.3973        | 1613.7023        | 3225.4133        | 1613.2103        | 29 |
| 7  | 825.4254         | 413.2163         | 808.3988         | 404.7030         | <b>807.4148</b>  | 404.2110         | E    | 3096.3555        | 1548.6814       | 3079.3289        | 1540.1681        | 3078.3449        | 1539.6761        | 28 |
| 8  | 962.4843         | 481.7458         | 945.4577         | 473.2325         | 944.4737         | 472.7405         | H    | 2967.3129        | 1484.1601       | 2950.2863        | 1475.6468        | 2949.3023        | 1475.1548        | 27 |
| 9  | 1093.5248        | <b>547.2660</b>  | <b>1076.4982</b> | 538.7527         | <b>1075.5142</b> | 538.2607         | M    | 2830.2540        | 1415.6306       | 2813.2274        | <b>1407.1173</b> | 2812.2434        | 1406.6253        | 26 |
| 10 | <b>1206.6088</b> | <b>603.8081</b>  | 1189.5823        | 595.2948         | 1188.5983        | 594.8028         | L    | 2699.2135        | 1350.1104       | 2682.1869        | 1341.5971        | 2681.2029        | 1341.1051        | 25 |
| 11 | <b>1321.6358</b> | 661.3215         | 1304.6092        | 652.8082         | 1303.6252        | 652.3162         | D    | 2586.1294        | 1293.5683       | 2569.1029        | 1285.0551        | 2568.1188        | 1284.5631        | 24 |
| 12 | <b>1420.7042</b> | <b>710.8557</b>  | 1403.6776        | 702.3425         | 1402.6936        | 701.8504         | V    | 2471.1025        | 1236.0549       | 2454.0759        | 1227.5416        | 2453.0919        | 1227.0496        | 23 |
| 13 | <b>1507.7362</b> | 754.3717         | 1490.7097        | <b>745.8585</b>  | 1489.7256        | <b>745.3665</b>  | S    | 2372.0340        | 1186.5207       | 2355.0075        | 1178.0074        | 2354.0235        | 1177.5154        | 22 |
| 14 | 1635.8312        | <b>818.4192</b>  | <b>1618.8046</b> | 809.9060         | <b>1617.8206</b> | 809.4139         | K    | 2285.0020        | 1143.0046       | 2267.9755        | 1134.4914        | 2266.9915        | 1133.9994        | 21 |
| 15 | <b>1748.9152</b> | 874.9613         | 1731.8887        | 866.4480         | 1730.9047        | 865.9560         | L    | 2156.9071        | 1078.9572       | 2139.8805        | 1070.4439        | 2138.8965        | 1069.9519        | 20 |
| 16 | 1849.9629        | <b>925.4851</b>  | <b>1832.9364</b> | 916.9718         | 1831.9524        | 916.4798         | T    | 2043.8230        | 1022.4151       | 2026.7964        | 1013.9019        | 2025.8124        | 1013.4099        | 19 |
| 17 | 1964.9899        | <b>982.9986</b>  | 1947.9633        | 974.4853         | <b>1946.9793</b> | 973.9933         | D    | 1942.7753        | 971.8913        | <b>1925.7488</b> | 963.3780         | <b>1924.7647</b> | 962.8860         | 18 |
| 18 | 2066.0375        | <b>1033.5224</b> | 2049.0110        | 1025.0091        | 2048.0270        | 1024.5171        | T    | <b>1827.7484</b> | 914.3778        | <b>1810.7218</b> | 905.8645         | 1809.7378        | 905.3725         | 17 |
| 19 | 2179.1216        | <b>1090.0644</b> | 2162.0951        | 1081.5512        | 2161.1110        | 1081.0592        | I    | <b>1726.7007</b> | 863.8540        | 1709.6741        | 855.3407         | 1708.6901        | 854.8487         | 16 |
| 20 | 2339.1523        | <b>1170.0798</b> | 2322.1257        | 1161.5665        | 2321.1417        | 1161.0745        | C    | 1613.6166        | <b>807.3120</b> | <b>1596.5901</b> | 798.7987         | <b>1595.6061</b> | 798.3067         | 15 |
| 21 | 2396.1737        | <b>1198.5905</b> | 2379.1472        | 1190.0772        | 2378.1632        | 1189.5852        | G    | 1453.5860        | <b>727.2966</b> | 1436.5594        | <b>718.7834</b>  | 1435.5754        | <b>718.2913</b>  | 14 |
| 22 | 2495.2421        | <b>1248.1247</b> | 2478.2156        | 1239.6114        | 2477.2316        | 1239.1194        | V    | 1396.5645        | 698.7859        | 1379.5380        | 690.2726         | 1378.5539        | 689.7806         | 13 |



|    |           |                  |           |                  |           |                  |          |                  |                 |                 |                 |                  |                 |           |
|----|-----------|------------------|-----------|------------------|-----------|------------------|----------|------------------|-----------------|-----------------|-----------------|------------------|-----------------|-----------|
| 23 | 2552.2636 | <b>1276.6354</b> | 2535.2370 | 1268.1222        | 2534.2530 | 1267.6302        | <b>G</b> | <b>1297.4961</b> | <b>649.2517</b> | 1280.4696       | <b>640.7384</b> | <b>1279.4855</b> | <b>640.2464</b> | <b>12</b> |
| 24 | 2667.2905 | <b>1334.1489</b> | 2650.2640 | 1325.6356        | 2649.2800 | 1325.1436        | <b>N</b> | 1240.4746        | 620.7410        | 1223.4481       | <b>612.2277</b> | 1222.4641        | <b>611.7357</b> | <b>11</b> |
| 25 | 2814.3259 | <b>1407.6666</b> | 2797.2994 | 1399.1533        | 2796.3154 | 1398.6613        | <b>M</b> | 1125.4477        | <b>563.2275</b> | 1108.4211       | <b>554.7142</b> | 1107.4371        | <b>554.2222</b> | <b>10</b> |
| 26 | 2901.3580 | 1451.1826        | 2884.3314 | 1442.6693        | 2883.3474 | 1442.1773        | <b>S</b> | 978.4123         | 489.7098        | 961.3857        | 481.1965        | 960.4017         | 480.7045        | <b>9</b>  |
| 27 | 2972.3951 | 1486.7012        | 2955.3685 | 1478.1879        | 2954.3845 | 1477.6959        | <b>A</b> | <b>891.3803</b>  | 446.1938        | 874.3537        | 437.6805        | 873.3697         | 437.1885        | <b>8</b>  |
| 28 | 3086.4380 | <b>1543.7226</b> | 3069.4115 | 1535.2094        | 3068.4274 | 1534.7174        | <b>N</b> | <b>820.3432</b>  | 410.6752        | 803.3166        | 402.1619        | <b>802.3326</b>  | 401.6699        | <b>7</b>  |
| 29 | 3157.4751 | 1579.2412        | 3140.4486 | <b>1570.7279</b> | 3139.4646 | <b>1570.2359</b> | <b>A</b> | <b>706.3002</b>  | 353.6538        | 689.2737        | <b>345.1405</b> | 688.2897         | 344.6485        | <b>6</b>  |
| 30 | 3244.5071 | 1622.7572        | 3227.4806 | 1614.2439        | 3226.4966 | 1613.7519        | <b>S</b> | <b>635.2631</b>  | 318.1352        | 618.2366        | <b>309.6219</b> | 617.2525         | 309.1299        | <b>5</b>  |
| 31 | 3359.5341 | 1680.2707        | 3342.5075 | 1671.7574        | 3341.5235 | 1671.2654        | <b>D</b> | <b>548.2311</b>  | 274.6192        | <b>531.2045</b> | 266.1059        | <b>530.2205</b>  | 265.6139        | <b>4</b>  |
| 32 | 3488.5767 | 1744.7920        | 3471.5501 | 1736.2787        | 3470.5661 | 1735.7867        | <b>Q</b> | <b>433.2041</b>  | 217.1057        | 416.1776        | 208.5924        | 415.1936         | 208.1004        | <b>3</b>  |
| 33 | 3617.6193 | 1809.3133        | 3600.5927 | 1800.8000        | 3599.6087 | 1800.3080        | <b>E</b> | <b>304.1615</b>  | 152.5844        | 287.1350        | 144.0711        | 286.1510         | 143.5791        | <b>2</b>  |
| 34 |           |                  |           |                  |           |                  | <b>R</b> | 175.1190         | 88.0631         | 158.0924        | 79.5498         |                  |                 | <b>1</b>  |

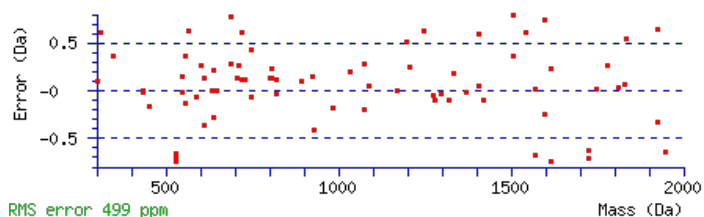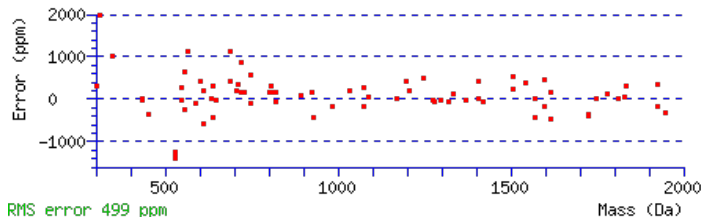

NCBI BLAST search of [ALHQVFEHMLDVSKLTDTCGVGNMSANASDQER](#)

(Parameters: blastp, nr protein database, expect=20000, no filter, PAM30)

Other BLAST [web gateways](#)

All matches to this query

| Score | Mr(calc)  | Delta  | Sequence                                          | Site Analysis                              |
|-------|-----------|--------|---------------------------------------------------|--------------------------------------------|
| 50.6  | 3790.7237 | 0.0154 | <a href="#">ALHQVFEHMLDVSKLTDTCGVGNMSANASDQER</a> | Deamidated N24, Q32, Oxidation M25; 40.50% |
| 49.4  | 3789.7397 | 0.9994 | <a href="#">ALHQVFEHMLDVSKLTDTCGVGNMSANASDQER</a> |                                            |
| 48.6  | 3789.7397 | 0.9994 | <a href="#">ALHQVFEHMLDVSKLTDTCGVGNMSANASDQER</a> |                                            |
| 48.2  | 3790.7237 | 0.0154 | <a href="#">ALHQVFEHMLDVSKLTDTCGVGNMSANASDQER</a> | Deamidated N24, N28, Oxidation M25; 23.41% |
| 45.0  | 3790.7237 | 0.0154 | <a href="#">ALHQVFEHMLDVSKLTDTCGVGNMSANASDQER</a> | Deamidated N28, Q32, Oxidation M25; 11.16% |
| 44.6  | 3790.7237 | 0.0154 | <a href="#">ALHQVFEHMLDVSKLTDTCGVGNMSANASDQER</a> | Deamidated Q4, N28, Oxidation M25; 10.32%  |
| 43.0  | 3790.7237 | 0.0154 | <a href="#">ALHQVFEHMLDVSKLTDTCGVGNMSANASDQER</a> | Deamidated Q4, Q32, Oxidation M25; 7.05%   |
| 42.8  | 3789.7397 | 0.9994 | <a href="#">ALHQVFEHMLDVSKLTDTCGVGNMSANASDQER</a> |                                            |
| 41.6  | 3790.7237 | 0.0154 | <a href="#">ALHQVFEHMLDVSKLTDTCGVGNMSANASDQER</a> | Deamidated Q4, N24, Oxidation M25; 5.10%   |
| 31.6  | 3789.7397 | 0.9994 | <a href="#">ALHQVFEHMLDVSKLTDTCGVGNMSANASDQER</a> |                                            |

Mascot: <http://www.matrixscience.com/>

# MATRIX SCIENCE Mascot Search Results

## Peptide View

MS/MS Fragmentation of **ALHQVFEHMLDVSKLTDTCGVGNMSANASDQER**

Found in **B4DQI1** in **con\_Xuniprot\_HUMAN3**, B4DQI1\_HUMAN Complement C2b fragment OS=Homo sapiens GN=C2 PE=2 SV=1

Match to Query 28070: 3791.756776 from(948.946470,4+) intensity(0.0000) rtinseconds(2177) scans(5820) index(24126)

Title: 111019\_Est\_MI\_YS\_G\_05Spectrum5036\_scans\_\_5820

Data file C:\mascot\20140703\_Tmgf\_1D\CSV\_UseAnalysis\MasterCSV\All\_Glyco\mgf\ptm\UC18ERLIC\_PTM\_35D.mgf

Click mouse within plot area to zoom in by factor of two about that point

Or, to Da

Label all possible matches Label matches used for scoring

Show Y-axis

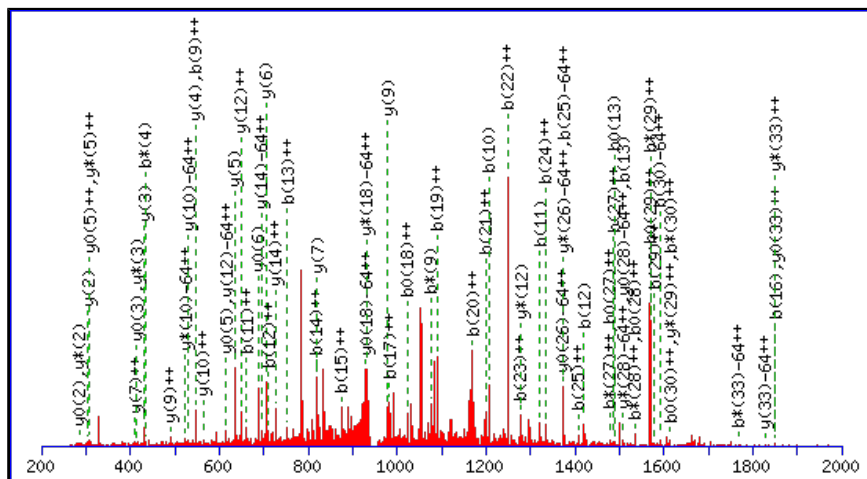

Monoisotopic mass of neutral peptide Mr(calc): 3789.7397

Fixed modifications: Carbamidomethyl (C) (apply to specified residues or termini only)

Variable modifications:

M25 : Oxidation (M), with neutral losses 0.0000(shown in table), 63.9983

N28 : Deamidated (NQ)

Ions Score: 51 Expect: 0.0017

Matches : 71/574 fragment ions using 133 most intense peaks ([help](#))

| #  | b         | b <sup>++</sup> | b <sup>*</sup> | b <sup>*++</sup> | b <sup>0</sup> | b <sup>0++</sup> | Seq. | y         | y <sup>++</sup> | y <sup>*</sup> | y <sup>*++</sup> | y <sup>0</sup> | y <sup>0++</sup> | #  |
|----|-----------|-----------------|----------------|------------------|----------------|------------------|------|-----------|-----------------|----------------|------------------|----------------|------------------|----|
| 1  | 72.0444   | 36.5258         |                |                  |                |                  | A    |           |                 |                |                  |                |                  | 34 |
| 2  | 185.1285  | 93.0679         |                |                  |                |                  | L    | 3719.7098 | 1860.3585       | 3702.6833      | 1851.8453        | 3701.6993      | 1851.3533        | 33 |
| 3  | 322.1874  | 161.5973        |                |                  |                |                  | H    | 3606.6258 | 1803.8165       | 3589.5992      | 1795.3032        | 3588.6152      | 1794.8112        | 32 |
| 4  | 450.2459  | 225.6266        | 433.2194       | 217.1133         |                |                  | Q    | 3469.5668 | 1735.2871       | 3452.5403      | 1726.7738        | 3451.5563      | 1726.2818        | 31 |
| 5  | 549.3144  | 275.1608        | 532.2878       | 266.6475         |                |                  | V    | 3341.5083 | 1671.2578       | 3324.4817      | 1662.7445        | 3323.4977      | 1662.2525        | 30 |
| 6  | 696.3828  | 348.6950        | 679.3562       | 340.1817         |                |                  | F    | 3242.4399 | 1621.7236       | 3225.4133      | 1613.2103        | 3224.4293      | 1612.7183        | 29 |
| 7  | 825.4254  | 413.2163        | 808.3988       | 404.7030         | 807.4148       | 404.2110         | E    | 3095.3714 | 1548.1894       | 3078.3449      | 1539.6761        | 3077.3609      | 1539.1841        | 28 |
| 8  | 962.4843  | 481.7458        | 945.4577       | 473.2325         | 944.4737       | 472.7405         | H    | 2966.3288 | 1483.6681       | 2949.3023      | 1475.1548        | 2948.3183      | 1474.6628        | 27 |
| 9  | 1093.5248 | 547.2660        | 1076.4982      | 538.7527         | 1075.5142      | 538.2607         | M    | 2829.2699 | 1415.1386       | 2812.2434      | 1406.6253        | 2811.2594      | 1406.1333        | 26 |
| 10 | 1206.6088 | 603.8081        | 1189.5823      | 595.2948         | 1188.5983      | 594.8028         | L    | 2698.2295 | 1349.6184       | 2681.2029      | 1341.1051        | 2680.2189      | 1340.6131        | 25 |
| 11 | 1321.6358 | 661.3215        | 1304.6092      | 652.8082         | 1303.6252      | 652.3162         | D    | 2585.1454 | 1293.0763       | 2568.1188      | 1284.5631        | 2567.1348      | 1284.0710        | 24 |
| 12 | 1420.7042 | 710.8557        | 1403.6776      | 702.3425         | 1402.6936      | 701.8504         | V    | 2470.1184 | 1235.5629       | 2453.0919      | 1227.0496        | 2452.1079      | 1226.5576        | 23 |
| 13 | 1507.7362 | 754.3717        | 1490.7097      | 745.8585         | 1489.7256      | 745.3665         | S    | 2371.0500 | 1186.0287       | 2354.0235      | 1177.5154        | 2353.0395      | 1177.0234        | 22 |
| 14 | 1635.8312 | 818.4192        | 1618.8046      | 809.9060         | 1617.8206      | 809.4139         | K    | 2284.0180 | 1142.5126       | 2266.9915      | 1133.9994        | 2266.0074      | 1133.5074        | 21 |
| 15 | 1748.9152 | 874.9613        | 1731.8887      | 866.4480         | 1730.9047      | 865.9560         | L    | 2155.9230 | 1078.4652       | 2138.8965      | 1069.9519        | 2137.9125      | 1069.4599        | 20 |
| 16 | 1849.9629 | 925.4851        | 1832.9364      | 916.9718         | 1831.9524      | 916.4798         | T    | 2042.8390 | 1021.9231       | 2025.8124      | 1013.4099        | 2024.8284      | 1012.9178        | 19 |
| 17 | 1964.9899 | 982.9986        | 1947.9633      | 974.4853         | 1946.9793      | 973.9933         | D    | 1941.7913 | 971.3993        | 1924.7647      | 962.8860         | 1923.7807      | 962.3940         | 18 |
| 18 | 2066.0375 | 1033.5224       | 2049.0110      | 1025.0091        | 2048.0270      | 1024.5171        | T    | 1826.7644 | 913.8858        | 1809.7378      | 905.3725         | 1808.7538      | 904.8805         | 17 |
| 19 | 2179.1216 | 1090.0644       | 2162.0951      | 1081.5512        | 2161.1110      | 1081.0592        | I    | 1725.7167 | 863.3620        | 1708.6901      | 854.8487         | 1707.7061      | 854.3567         | 16 |
| 20 | 2339.1523 | 1170.0798       | 2322.1257      | 1161.5665        | 2321.1417      | 1161.0745        | C    | 1612.6326 | 806.8199        | 1595.6061      | 798.3067         | 1594.6220      | 797.8147         | 15 |
| 21 | 2396.1737 | 1198.5905       | 2379.1472      | 1190.0772        | 2378.1632      | 1189.5852        | G    | 1452.6020 | 726.8046        | 1435.5754      | 718.2913         | 1434.5914      | 717.7993         | 14 |
| 22 | 2495.2421 | 1248.1247       | 2478.2156      | 1239.6114        | 2477.2316      | 1239.1194        | V    | 1395.5805 | 698.2939        | 1378.5539      | 689.7806         | 1377.5699      | 689.2886         | 13 |



|    |           |                  |           |                  |           |                  |   |                 |                 |                  |                 |                 |                 |    |
|----|-----------|------------------|-----------|------------------|-----------|------------------|---|-----------------|-----------------|------------------|-----------------|-----------------|-----------------|----|
| 23 | 2552.2636 | <b>1276.6354</b> | 2535.2370 | 1268.1222        | 2534.2530 | 1267.6302        | G | 1296.5121       | <b>648.7597</b> | <b>1279.4855</b> | 640.2464        | 1278.5015       | 639.7544        | 12 |
| 24 | 2666.3065 | <b>1333.6569</b> | 2649.2800 | 1325.1436        | 2648.2960 | 1324.6516        | N | 1239.4906       | 620.2489        | 1222.4641        | 611.7357        | 1221.4801       | 611.2437        | 11 |
| 25 | 2813.3419 | <b>1407.1746</b> | 2796.3154 | 1398.6613        | 2795.3314 | 1398.1693        | M | 1125.4477       | <b>563.2275</b> | 1108.4211        | 554.7142        | 1107.4371       | 554.2222        | 10 |
| 26 | 2900.3739 | 1450.6906        | 2883.3474 | 1442.1773        | 2882.3634 | 1441.6853        | S | <b>978.4123</b> | <b>489.7098</b> | 961.3857         | 481.1965        | 960.4017        | 480.7045        | 9  |
| 27 | 2971.4111 | <b>1486.2092</b> | 2954.3845 | <b>1477.6959</b> | 2953.4005 | <b>1477.2039</b> | A | 891.3803        | 446.1938        | 874.3537         | 437.6805        | 873.3697        | 437.1885        | 8  |
| 28 | 3086.4380 | 1543.7226        | 3069.4115 | <b>1535.2094</b> | 3068.4274 | <b>1534.7174</b> | N | <b>820.3432</b> | <b>410.6752</b> | 803.3166         | 402.1619        | 802.3326        | 401.6699        | 7  |
| 29 | 3157.4751 | <b>1579.2412</b> | 3140.4486 | <b>1570.7279</b> | 3139.4646 | <b>1570.2359</b> | A | <b>705.3162</b> | 353.1617        | 688.2897         | 344.6485        | <b>687.3056</b> | 344.1565        | 6  |
| 30 | 3244.5071 | 1622.7572        | 3227.4806 | <b>1614.2439</b> | 3226.4966 | <b>1613.7519</b> | S | <b>634.2791</b> | 317.6432        | 617.2525         | <b>309.1299</b> | <b>616.2685</b> | <b>308.6379</b> | 5  |
| 31 | 3359.5341 | 1680.2707        | 3342.5075 | 1671.7574        | 3341.5235 | 1671.2654        | D | <b>547.2471</b> | 274.1272        | 530.2205         | 265.6139        | 529.2365        | 265.1219        | 4  |
| 32 | 3487.5927 | 1744.3000        | 3470.5661 | 1735.7867        | 3469.5821 | 1735.2947        | Q | <b>432.2201</b> | 216.6137        | <b>415.1936</b>  | 208.1004        | <b>414.2096</b> | 207.6084        | 3  |
| 33 | 3616.6353 | 1808.8213        | 3599.6087 | 1800.3080        | 3598.6247 | 1799.8160        | E | <b>304.1615</b> | 152.5844        | <b>287.1350</b>  | 144.0711        | <b>286.1510</b> | 143.5791        | 2  |
| 34 |           |                  |           |                  |           |                  | R | 175.1190        | 88.0631         | 158.0924         | 79.5498         |                 |                 | 1  |

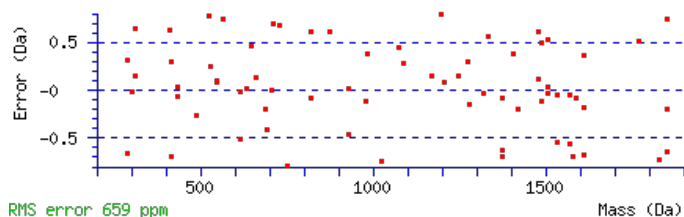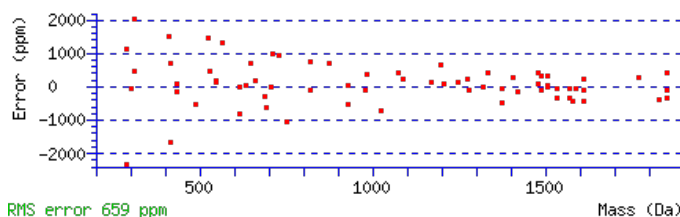

NCBI BLAST search of [ALHQVFEHMLDVSKLTDTCGVGNMSANASDQER](#)

(Parameters: blastp, nr protein database, expect=20000, no filter, PAM30)

Other BLAST [web gateways](#)

All matches to this query

| Score | Mr(calc)  | Delta  | Sequence                                            | Site Analysis                         |
|-------|-----------|--------|-----------------------------------------------------|---------------------------------------|
| 50.5  | 3789.7397 | 2.0171 | <a href="#">ALHQVFEHMLDVSKLTDTCGVGNMSANASDQER</a>   | Deamidated N28, Oxidation M25; 49.59% |
| 49.2  | 3789.7397 | 2.0171 | <a href="#">ALHQVFEHMLDVSKLTDTCGVGNMSANASDQER</a>   | Deamidated Q32, Oxidation M25; 36.84% |
| 43.6  | 3789.7397 | 2.0171 | <a href="#">ALHQVFEHMLDVSKLTDTCGVGNMSANASDQER</a>   | Deamidated N24, Oxidation M25; 10.12% |
| 38.9  | 3789.7397 | 2.0171 | <a href="#">ALHQVFEHMLDVSKLTDTCGVGNMSANASDQER</a>   | Deamidated Q4, Oxidation M25; 3.44%   |
| 5.8   | 3791.7497 | 0.0071 | <a href="#">EQHLSSENEPVDNTSDNNLFTDLDLKSIVKNSASK</a> |                                       |
| 5.1   | 3790.7562 | 1.0006 | <a href="#">TKVMQYTVITCVTSGSGMDYFEMINQATTNIDKR</a>  |                                       |
| 4.7   | 3790.7528 | 1.0040 | <a href="#">MEEVYLPDNINEGQVQVRTLYLSVDPYMRCR</a>     |                                       |
| 4.4   | 3791.7402 | 0.0165 | <a href="#">TKVMQYTVITCVTSGSGMDYFEMINQATTNIDKR</a>  |                                       |
| 4.4   | 3790.7562 | 1.0006 | <a href="#">TKVMQYTVITCVTSGSGMDYFEMINQATTNIDKR</a>  |                                       |
| 4.1   | 3790.7657 | 0.9911 | <a href="#">EQHLSSENEPVDNTSDNNLFTDLDLKSIVKNSASK</a> |                                       |

Mascot: <http://www.matrixscience.com/>

# MASCOT SCIENCE Mascot Search Results

## Peptide View

MS/MS Fragmentation of **TMFPNLT DVR**

Found in **B4DQI1** in **con\_Xuniprot\_HUMAN3**, B4DQI1\_HUMAN Complement C2b fragment OS=Homo sapiens GN=C2 PE=2 SV=1

Match to Query 1626: 1193.577888 from(597.796220,2+) intensity(241547.7031) rtinseconds(1596) scans(3997) index(26668)

Title: 111019\_Est\_MI\_YS\_G\_09Spectrum3463\_scans\_3997

Data file C:\\mascot\\20140703\_Tmgf\_1D\\CSV\_UseAnalysis\\MasterCSV\\All\_Glyco\\mgf\\ptm\\UC18ERLIC\_PTM\_35D.mgf

Click mouse within plot area to zoom in by factor of two about that point

Or, to Da

Label all possible matches Label matches used for scoring

Show Y-axis

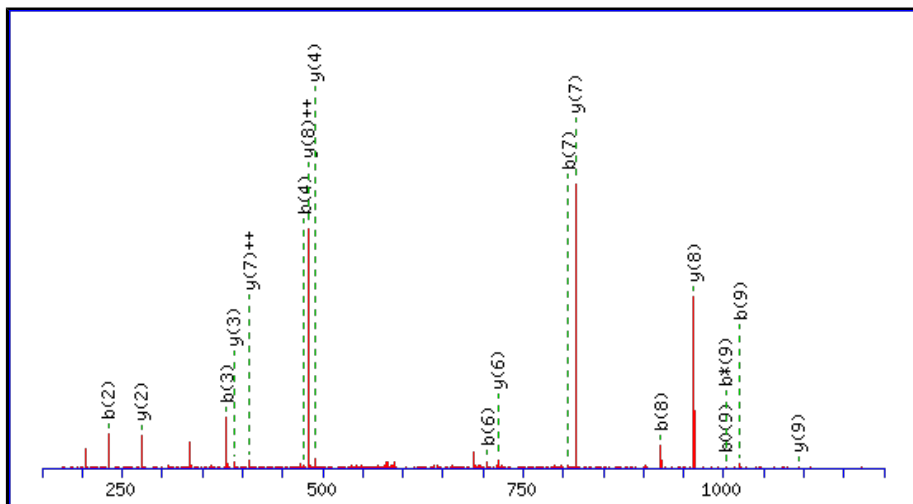

Monoisotopic mass of neutral peptide Mr(calc): 1193.5751

Fixed modifications: Carbamidomethyl (C) (apply to specified residues or termini only)

Variable modifications:

N5 : Deamidated (NQ)

Ions Score: 50 Expect: 0.0018

Matches : 18/96 fragment ions using 30 most intense peaks ([help](#))

| #  | b                | b <sup>++</sup> | b <sup>*</sup>   | b <sup>*++</sup> | b <sup>0</sup>   | b <sup>0++</sup> | Seq. | y                | y <sup>++</sup> | y <sup>*</sup> | y <sup>*++</sup> | y <sup>0</sup> | y <sup>0++</sup> | #  |
|----|------------------|-----------------|------------------|------------------|------------------|------------------|------|------------------|-----------------|----------------|------------------|----------------|------------------|----|
| 1  | 102.0550         | 51.5311         |                  |                  | 84.0444          | 42.5258          | T    |                  |                 |                |                  |                |                  | 10 |
| 2  | <b>233.0954</b>  | 117.0514        |                  |                  | 215.0849         | 108.0461         | M    | <b>1093.5347</b> | 547.2710        | 1076.5081      | 538.7577         | 1075.5241      | 538.2657         | 9  |
| 3  | <b>380.1639</b>  | 190.5856        |                  |                  | 362.1533         | 181.5803         | F    | <b>962.4942</b>  | <b>481.7507</b> | 945.4676       | 473.2375         | 944.4836       | 472.7454         | 8  |
| 4  | <b>477.2166</b>  | 239.1119        |                  |                  | 459.2061         | 230.1067         | P    | <b>815.4258</b>  | <b>408.2165</b> | 798.3992       | 399.7032         | 797.4152       | 399.2112         | 7  |
| 5  | 592.2436         | 296.6254        | 575.2170         | 288.1121         | 574.2330         | 287.6201         | N    | <b>718.3730</b>  | 359.6901        | 701.3464       | 351.1769         | 700.3624       | 350.6849         | 6  |
| 6  | <b>705.3276</b>  | 353.1675        | 688.3011         | 344.6542         | 687.3171         | 344.1622         | L    | 603.3461         | 302.1767        | 586.3195       | 293.6634         | 585.3355       | 293.1714         | 5  |
| 7  | <b>806.3753</b>  | 403.6913        | 789.3488         | 395.1780         | 788.3647         | 394.6860         | T    | <b>490.2620</b>  | 245.6346        | 473.2354       | 237.1214         | 472.2514       | 236.6293         | 4  |
| 8  | <b>921.4022</b>  | 461.2048        | 904.3757         | 452.6915         | 903.3917         | 452.1995         | D    | <b>389.2143</b>  | 195.1108        | 372.1878       | 186.5975         | 371.2037       | 186.1055         | 3  |
| 9  | <b>1020.4707</b> | 510.7390        | <b>1003.4441</b> | 502.2257         | <b>1002.4601</b> | 501.7337         | V    | <b>274.1874</b>  | 137.5973        | 257.1608       | 129.0840         |                |                  | 2  |
| 10 |                  |                 |                  |                  |                  |                  | R    | 175.1190         | 88.0631         | 158.0924       | 79.5498          |                |                  | 1  |

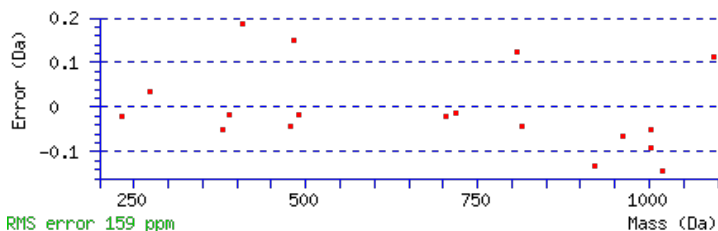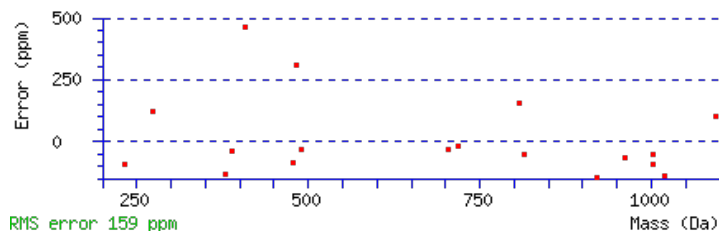

NCBI BLAST search of **TMFPNLT DVR**

(Parameters: blastp, nr protein database, expect=20000, no filter, PAM30)

Other BLAST [web gateways](#)

**All matches to this query**

| Score | Mr(calc)  | Delta  | Sequence                      |
|-------|-----------|--------|-------------------------------|
| 50.4  | 1193.5751 | 0.0028 | <a href="#">TMFPNLTDVR</a>    |
| 12.6  | 1191.5771 | 2.0007 | <a href="#">NDFEPVKQSK</a>    |
| 12.0  | 1193.5724 | 0.0055 | <a href="#">KGGHTCEIHR</a>    |
| 9.6   | 1193.5724 | 0.0055 | <a href="#">GGFVGRGAGGMGR</a> |
| 9.4   | 1191.5740 | 2.0039 | <a href="#">VMMGVQINER</a>    |
| 7.5   | 1191.5772 | 2.0007 | <a href="#">FPDDLDTNKK</a>    |
| 6.8   | 1191.5772 | 2.0007 | <a href="#">VLDNYPDTVR</a>    |
| 4.8   | 1191.5731 | 2.0048 | <a href="#">TQSSAGVQATNK</a>  |
| 4.2   | 1193.5764 | 0.0015 | <a href="#">HHPDLIFCR</a>     |
| 4.0   | 1191.5731 | 2.0048 | <a href="#">TQSSAGVQATNK</a>  |

Mascot: <http://www.matrixscience.com/>

# MATRIX SCIENCE Mascot Search Results

## Peptide View

MS/MS Fragmentation of **ALHQVFEHMLDVSKLTDTCGVGNMSANASDQER**

Found in **B4DQI1** in **con\_Xuniprot\_HUMAN3**, B4DQI1\_HUMAN Complement C2b fragment OS=Homo sapiens GN=C2 PE=2 SV=1

Match to Query 28066: 3775.742520 from(756.155780,5+) intensity(27890.1602) rtinseconds(2188) scans(5688) index(9718)

Title: 111019\_Est\_ISCardio\_NMI\_YS\_G\_5Spectrum4904\_scans\_\_5688

Data file C:\mascot\20140703\_Tmgf\_1D\CSV\_UseAnalysis\MasterCSV\All\_Glyco\mgf\ptm\UC18ERLIC\_PTM\_35D.mgf

Click mouse within plot area to zoom in by factor of two about that point

Or, to Da

Label all possible matches Label matches used for scoring

Show Y-axis

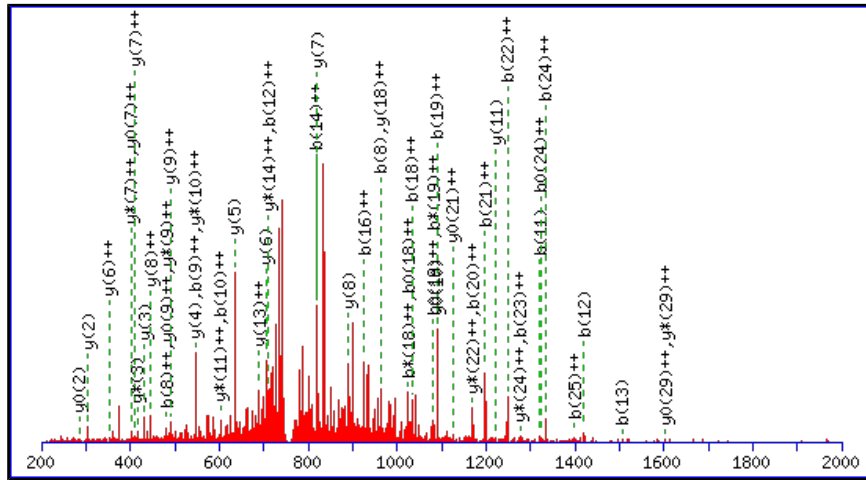

Monoisotopic mass of neutral peptide Mr(calc): 3773.7447

Fixed modifications: Carbamidomethyl (C) (apply to specified residues or termini only)

Variable modifications:

N28 : Deamidated (NQ)

Ions Score: 46 Expect: 0.0046

Matches : 52/376 fragment ions using 105 most intense peaks ([help](#))

| #  | b                | b <sup>++</sup>  | b <sup>*</sup> | b <sup>*++</sup> | b <sup>0</sup> | b <sup>0++</sup> | Seq. | y         | y <sup>++</sup> | y <sup>*</sup> | y <sup>*++</sup> | y <sup>0</sup> | y <sup>0++</sup> | #  |
|----|------------------|------------------|----------------|------------------|----------------|------------------|------|-----------|-----------------|----------------|------------------|----------------|------------------|----|
| 1  | 72.0444          | 36.5258          |                |                  |                |                  | A    |           |                 |                |                  |                |                  | 34 |
| 2  | 185.1285         | 93.0679          |                |                  |                |                  | L    | 3703.7149 | 1852.3611       | 3686.6884      | 1843.8478        | 3685.7043      | 1843.3558        | 33 |
| 3  | 322.1874         | 161.5973         |                |                  |                |                  | H    | 3590.6308 | 1795.8191       | 3573.6043      | 1787.3058        | 3572.6203      | 1786.8138        | 32 |
| 4  | 450.2459         | 225.6266         | 433.2194       | 217.1133         |                |                  | Q    | 3453.5719 | 1727.2896       | 3436.5454      | 1718.7763        | 3435.5614      | 1718.2843        | 31 |
| 5  | 549.3144         | 275.1608         | 532.2878       | 266.6475         |                |                  | V    | 3325.5134 | 1663.2603       | 3308.4868      | 1654.7470        | 3307.5028      | 1654.2550        | 30 |
| 6  | 696.3828         | 348.6950         | 679.3562       | 340.1817         |                |                  | F    | 3226.4449 | 1613.7261       | 3209.4184      | 1605.2128        | 3208.4344      | 1604.7208        | 29 |
| 7  | 825.4254         | 413.2163         | 808.3988       | 404.7030         | 807.4148       | 404.2110         | E    | 3079.3765 | 1540.1919       | 3062.3500      | 1531.6786        | 3061.3660      | 1531.1866        | 28 |
| 8  | <b>962.4843</b>  | <b>481.7458</b>  | 945.4577       | 473.2325         | 944.4737       | 472.7405         | H    | 2950.3339 | 1475.6706       | 2933.3074      | 1467.1573        | 2932.3234      | 1466.6653        | 27 |
| 9  | 1093.5248        | <b>547.2660</b>  | 1076.4982      | 538.7527         | 1075.5142      | 538.2607         | M    | 2813.2750 | 1407.1411       | 2796.2485      | 1398.6279        | 2795.2645      | 1398.1359        | 26 |
| 10 | 1206.6088        | <b>603.8081</b>  | 1189.5823      | 595.2948         | 1188.5983      | 594.8028         | L    | 2682.2345 | 1341.6209       | 2665.2080      | 1333.1076        | 2664.2240      | 1332.6156        | 25 |
| 11 | <b>1321.6358</b> | 661.3215         | 1304.6092      | 652.8082         | 1303.6252      | 652.3162         | D    | 2569.1505 | 1285.0789       | 2552.1239      | <b>1276.5656</b> | 2551.1399      | 1276.0736        | 24 |
| 12 | <b>1420.7042</b> | <b>710.8557</b>  | 1403.6776      | 702.3425         | 1402.6936      | 701.8504         | V    | 2454.1235 | 1227.5654       | 2437.0970      | 1219.0521        | 2436.1130      | 1218.5601        | 23 |
| 13 | <b>1507.7362</b> | 754.3717         | 1490.7097      | 745.8585         | 1489.7256      | 745.3665         | S    | 2355.0551 | 1178.0312       | 2338.0286      | <b>1169.5179</b> | 2337.0446      | 1169.0259        | 22 |
| 14 | 1635.8312        | <b>818.4192</b>  | 1618.8046      | 809.9060         | 1617.8206      | 809.4139         | K    | 2268.0231 | 1134.5152       | 2250.9965      | 1126.0019        | 2250.0125      | <b>1125.5099</b> | 21 |
| 15 | 1748.9152        | 874.9613         | 1731.8887      | 866.4480         | 1730.9047      | 865.9560         | L    | 2139.9281 | 1070.4677       | 2122.9016      | 1061.9544        | 2121.9176      | 1061.4624        | 20 |
| 16 | 1849.9629        | <b>925.4851</b>  | 1832.9364      | 916.9718         | 1831.9524      | 916.4798         | T    | 2026.8441 | 1013.9257       | 2009.8175      | 1005.4124        | 2008.8335      | 1004.9204        | 19 |
| 17 | 1964.9899        | 982.9986         | 1947.9633      | 974.4853         | 1946.9793      | 973.9933         | D    | 1925.7964 | <b>963.4018</b> | 1908.7698      | 954.8886         | 1907.7858      | 954.3965         | 18 |
| 18 | 2066.0375        | <b>1033.5224</b> | 2049.0110      | <b>1025.0091</b> | 2048.0270      | <b>1024.5171</b> | T    | 1810.7694 | 905.8884        | 1793.7429      | 897.3751         | 1792.7589      | 896.8831         | 17 |
| 19 | 2179.1216        | <b>1090.0644</b> | 2162.0951      | <b>1081.5512</b> | 2161.1110      | <b>1081.0592</b> | I    | 1709.7218 | 855.3645        | 1692.6952      | 846.8512         | 1691.7112      | 846.3592         | 16 |
| 20 | 2339.1523        | <b>1170.0798</b> | 2322.1257      | 1161.5665        | 2321.1417      | 1161.0745        | C    | 1596.6377 | 798.8225        | 1579.6111      | 790.3092         | 1578.6271      | 789.8172         | 15 |
| 21 | 2396.1737        | <b>1198.5905</b> | 2379.1472      | 1190.0772        | 2378.1632      | 1189.5852        | G    | 1436.6070 | 718.8072        | 1419.5805      | <b>710.2939</b>  | 1418.5965      | 709.8019         | 14 |
| 22 | 2495.2421        | <b>1248.1247</b> | 2478.2156      | 1239.6114        | 2477.2316      | 1239.1194        | V    | 1379.5856 | <b>690.2964</b> | 1362.5590      | 681.7832         | 1361.5750      | 681.2911         | 13 |
| 23 | 2552.2636        | <b>1276.6354</b> | 2535.2370      | 1268.1222        | 2534.2530      | 1267.6302        | G    | 1280.5172 | 640.7622        | 1263.4906      | 632.2489         | 1262.5066      | 631.7569         | 12 |

|    |           |                  |           |           |           |                  |   |                  |                 |                 |                 |                  |                 |           |
|----|-----------|------------------|-----------|-----------|-----------|------------------|---|------------------|-----------------|-----------------|-----------------|------------------|-----------------|-----------|
| 24 | 2666.3065 | <b>1333.6569</b> | 2649.2800 | 1325.1436 | 2648.2960 | <b>1324.6516</b> | N | <b>1223.4957</b> | 612.2515        | 1206.4692       | <b>603.7382</b> | 1205.4851        | 603.2462        | <b>11</b> |
| 25 | 2797.3470 | <b>1399.1771</b> | 2780.3205 | 1390.6639 | 2779.3364 | 1390.1719        | M | 1109.4528        | 555.2300        | 1092.4262       | <b>546.7168</b> | <b>1091.4422</b> | 546.2247        | <b>10</b> |
| 26 | 2884.3790 | 1442.6932        | 2867.3525 | 1434.1799 | 2866.3685 | 1433.6879        | S | 978.4123         | <b>489.7098</b> | 961.3857        | <b>481.1965</b> | 960.4017         | <b>480.7045</b> | <b>9</b>  |
| 27 | 2955.4161 | 1478.2117        | 2938.3896 | 1469.6984 | 2937.4056 | 1469.2064        | A | <b>891.3803</b>  | <b>446.1938</b> | 874.3537        | 437.6805        | 873.3697         | 437.1885        | <b>8</b>  |
| 28 | 3070.4431 | 1535.7252        | 3053.4165 | 1527.2119 | 3052.4325 | 1526.7199        | N | <b>820.3432</b>  | <b>410.6752</b> | 803.3166        | <b>402.1619</b> | 802.3326         | <b>401.6699</b> | <b>7</b>  |
| 29 | 3141.4802 | 1571.2437        | 3124.4537 | 1562.7305 | 3123.4696 | 1562.2385        | A | <b>705.3162</b>  | <b>353.1617</b> | 688.2897        | 344.6485        | 687.3056         | 344.1565        | <b>6</b>  |
| 30 | 3228.5122 | 1614.7598        | 3211.4857 | 1606.2465 | 3210.5017 | 1605.7545        | S | <b>634.2791</b>  | 317.6432        | 617.2525        | 309.1299        | 616.2685         | 308.6379        | <b>5</b>  |
| 31 | 3343.5392 | 1672.2732        | 3326.5126 | 1663.7600 | 3325.5286 | 1663.2679        | D | <b>547.2471</b>  | 274.1272        | 530.2205        | 265.6139        | 529.2365         | 265.1219        | <b>4</b>  |
| 32 | 3471.5978 | 1736.3025        | 3454.5712 | 1727.7892 | 3453.5872 | 1727.2972        | Q | <b>432.2201</b>  | 216.6137        | <b>415.1936</b> | 208.1004        | 414.2096         | 207.6084        | <b>3</b>  |
| 33 | 3600.6403 | 1800.8238        | 3583.6138 | 1792.3105 | 3582.6298 | 1791.8185        | E | <b>304.1615</b>  | 152.5844        | 287.1350        | 144.0711        | <b>286.1510</b>  | 143.5791        | <b>2</b>  |
| 34 |           |                  |           |           |           |                  | R | 175.1190         | 88.0631         | 158.0924        | 79.5498         |                  |                 | <b>1</b>  |

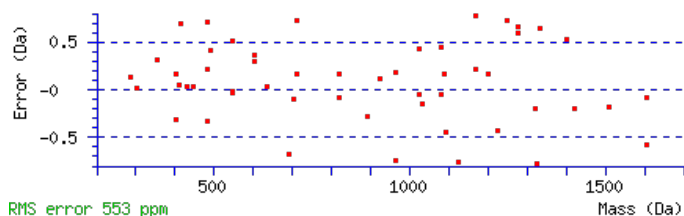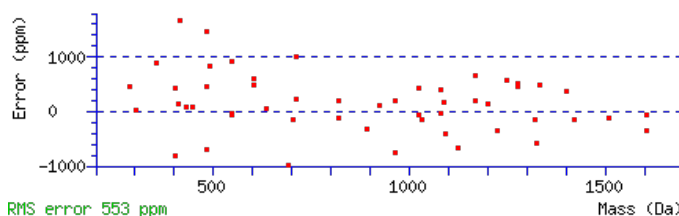

NCBI BLAST search of [ALHQVFEHMLDVSKLTDTCGVGNMSANASDQER](#)

(Parameters: blastp, nr protein database, expect=20000, no filter, PAM30)

Other BLAST [web gateways](#)

**All matches to this query**

| Score | Mr(calc)  | Delta  | Sequence                                          | Site Analysis         |
|-------|-----------|--------|---------------------------------------------------|-----------------------|
| 46.1  | 3773.7447 | 1.9978 | <a href="#">ALHQVFEHMLDVSKLTDTCGVGNMSANASDQER</a> | Deamidated N28 56.45% |
| 42.0  | 3774.7287 | 1.0138 | <a href="#">ALHQVFEHMLDVSKLTDTCGVGNMSANASDQER</a> |                       |
| 41.9  | 3773.7447 | 1.9978 | <a href="#">ALHQVFEHMLDVSKLTDTCGVGNMSANASDQER</a> | Deamidated N24 21.66% |
| 40.6  | 3774.7287 | 1.0138 | <a href="#">ALHQVFEHMLDVSKLTDTCGVGNMSANASDQER</a> |                       |
| 39.5  | 3773.7447 | 1.9978 | <a href="#">ALHQVFEHMLDVSKLTDTCGVGNMSANASDQER</a> | Deamidated Q32 12.32% |
| 38.4  | 3774.7287 | 1.0138 | <a href="#">ALHQVFEHMLDVSKLTDTCGVGNMSANASDQER</a> |                       |
| 38.4  | 3773.7447 | 1.9978 | <a href="#">ALHQVFEHMLDVSKLTDTCGVGNMSANASDQER</a> | Deamidated Q4 9.56%   |
| 37.0  | 3774.7287 | 1.0138 | <a href="#">ALHQVFEHMLDVSKLTDTCGVGNMSANASDQER</a> |                       |
| 30.7  | 3774.7287 | 1.0138 | <a href="#">ALHQVFEHMLDVSKLTDTCGVGNMSANASDQER</a> |                       |
| 24.5  | 3774.7287 | 1.0138 | <a href="#">ALHQVFEHMLDVSKLTDTCGVGNMSANASDQER</a> |                       |

Mascot: <http://www.matrixscience.com/>

# MATRIX SCIENCE Mascot Search Results

## Peptide View

MS/MS Fragmentation of **TMFPNLTDVR**

Found in **B4DQI1** in **con\_Xuniprot\_HUMAN3**, B4DQI1\_HUMAN Complement C2b fragment OS=Homo sapiens GN=C2 PE=2 SV=1

Match to Query 1699: 1209.575048 from(605.794800,2+) intensity(6849.5000) rtinseconds(1354) scans(3156) index(20707)

Title: 111019\_Est\_MI\_YP\_G\_11Spectrum2762\_scans\_\_3156

Data file C:\\mascot\\20140703\_Tmgf\_1D\\CSV\_UseAnalysis\\MasterCSV\\All\_Glyco\\mgf\\ptm\\UC18ERLIC\_PTM\_35D.mgf

Click mouse within plot area to zoom in by factor of two about that point

Or, to Da

Label all possible matches      Label matches used for scoring

Show Y-axis

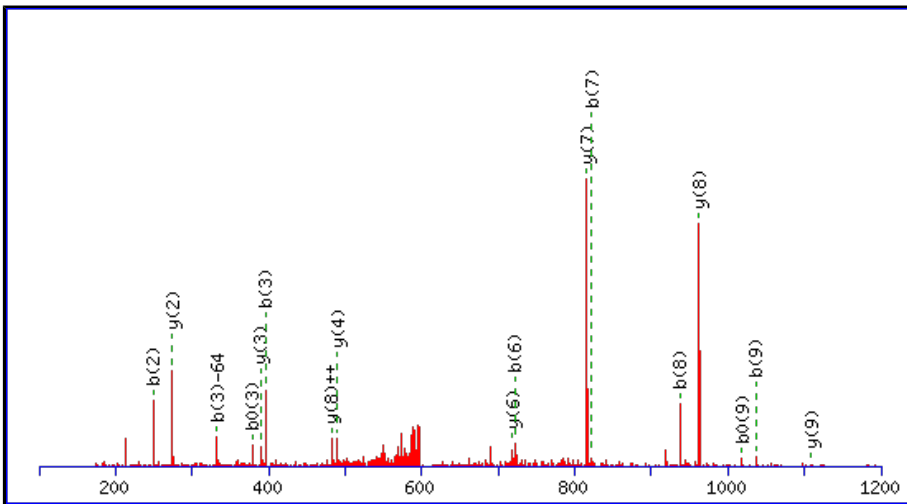

Monoisotopic mass of neutral peptide Mr(calc): 1209.5700

Fixed modifications: Carbamidomethyl (C) (apply to specified residues or termini only)

Variable modifications:

M2 : Oxidation (M), with neutral losses 0.0000(shown in table), 63.9983

N5 : Deamidated (NQ)

Ions Score: 46      Expect: 0.0048

Matches : 17/144 fragment ions using 33 most intense peaks ([help](#))

| #  | b                | b <sup>++</sup> | b*        | b <sup>+++</sup> | b <sup>0</sup>   | b <sup>0++</sup> | Seq. | y                | y <sup>++</sup> | y*        | y <sup>+++</sup> | y <sup>0</sup> | y <sup>0++</sup> | #  |
|----|------------------|-----------------|-----------|------------------|------------------|------------------|------|------------------|-----------------|-----------|------------------|----------------|------------------|----|
| 1  | 102.0550         | 51.5311         |           |                  | 84.0444          | 42.5258          | T    |                  |                 |           |                  |                |                  | 10 |
| 2  | <b>249.0904</b>  | 125.0488        |           |                  | 231.0798         | 116.0435         | M    | <b>1109.5296</b> | 555.2684        | 1092.5030 | 546.7552         | 1091.5190      | 546.2631         | 9  |
| 3  | <b>396.1588</b>  | 198.5830        |           |                  | <b>378.1482</b>  | 189.5777         | F    | <b>962.4942</b>  | <b>481.7507</b> | 945.4676  | 473.2375         | 944.4836       | 472.7454         | 8  |
| 4  | 493.2115         | 247.1094        |           |                  | 475.2010         | 238.1041         | P    | <b>815.4258</b>  | 408.2165        | 798.3992  | 399.7032         | 797.4152       | 399.2112         | 7  |
| 5  | 608.2385         | 304.6229        | 591.2119  | 296.1096         | 590.2279         | 295.6176         | N    | <b>718.3730</b>  | 359.6901        | 701.3464  | 351.1769         | 700.3624       | 350.6849         | 6  |
| 6  | <b>721.3225</b>  | 361.1649        | 704.2960  | 352.6516         | 703.3120         | 352.1596         | L    | 603.3461         | 302.1767        | 586.3195  | 293.6634         | 585.3355       | 293.1714         | 5  |
| 7  | <b>822.3702</b>  | 411.6887        | 805.3437  | 403.1755         | 804.3597         | 402.6835         | T    | <b>490.2620</b>  | 245.6346        | 473.2354  | 237.1214         | 472.2514       | 236.6293         | 4  |
| 8  | <b>937.3972</b>  | 469.2022        | 920.3706  | 460.6889         | 919.3866         | 460.1969         | D    | <b>389.2143</b>  | 195.1108        | 372.1878  | 186.5975         | 371.2037       | 186.1055         | 3  |
| 9  | <b>1036.4656</b> | 518.7364        | 1019.4390 | 510.2232         | <b>1018.4550</b> | 509.7311         | V    | <b>274.1874</b>  | 137.5973        | 257.1608  | 129.0840         |                |                  | 2  |
| 10 |                  |                 |           |                  |                  |                  | R    | 175.1190         | 88.0631         | 158.0924  | 79.5498          |                |                  | 1  |

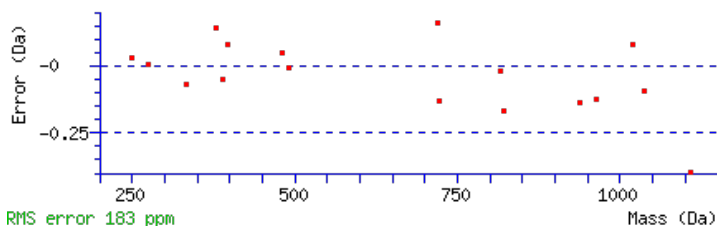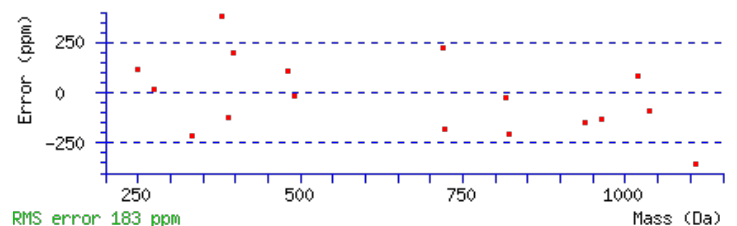

NCBI BLAST search of **TMFPNLTDVR**

(Parameters: blastp, nr protein database, expect=20000, no filter, PAM30)

Other BLAST [web gateways](#)

**All matches to this query**

| Score | Mr(calc)  | Delta   | Sequence                    |
|-------|-----------|---------|-----------------------------|
| 45.6  | 1209.5700 | 0.0051  | <a href="#">TMFPNLTDVR</a>  |
| 15.2  | 1209.5778 | -0.0028 | <a href="#">TFFDHSSLTR</a>  |
| 7.6   | 1209.5812 | -0.0062 | <a href="#">GQFSQLMGAVR</a> |
| 7.4   | 1209.5699 | 0.0051  | <a href="#">YTMVPESLNR</a>  |
| 7.0   | 1207.5721 | 2.0030  | <a href="#">TFEDNLIEAR</a>  |
| 6.1   | 1209.5812 | -0.0062 | <a href="#">GQFSQLMGAVR</a> |
| 5.8   | 1209.5700 | 0.0051  | <a href="#">AAMQFGDTEIK</a> |
| 4.8   | 1208.5673 | 1.0077  | <a href="#">TEEGPTLSYGR</a> |
| 3.2   | 1209.5738 | 0.0013  | <a href="#">YSRDQAESVR</a>  |
| 3.0   | 1208.5747 | 1.0003  | <a href="#">TQMPDPKTEK</a>  |

**Mascot:** <http://www.matrixscience.com/>



# MATRIX SCIENCE Mascot Search Results

## Peptide View

MS/MS Fragmentation of **LTDITICGVGNMSANASDQER**

Found in **B4DQI1** in **con\_Xuniprot\_HUMAN3**, B4DQI1\_HUMAN Complement C2b fragment OS=Homo sapiens GN=C2 PE=2 SV=1

Match to Query 14392: 2139.921748 from(1070.968150,2+) intensity(18929.9277) rtinseconds(1114) scans(2590) index(10861)

Title: 111019\_Est\_ISCardio\_NMI\_YS\_G\_7Spectrum2182\_scans\_2590

Data file C:\mascot\20140703\_Tmgf\_1D\CSV\_UseAnalysis\MasterCSV\All\_Glyco\mgf\ptm\UC18ERLIC\_PTM\_35D.mgf

Click mouse within plot area to zoom in by factor of two about that point

Or, to Da

Label all possible matches Label matches used for scoring

Show Y-axis

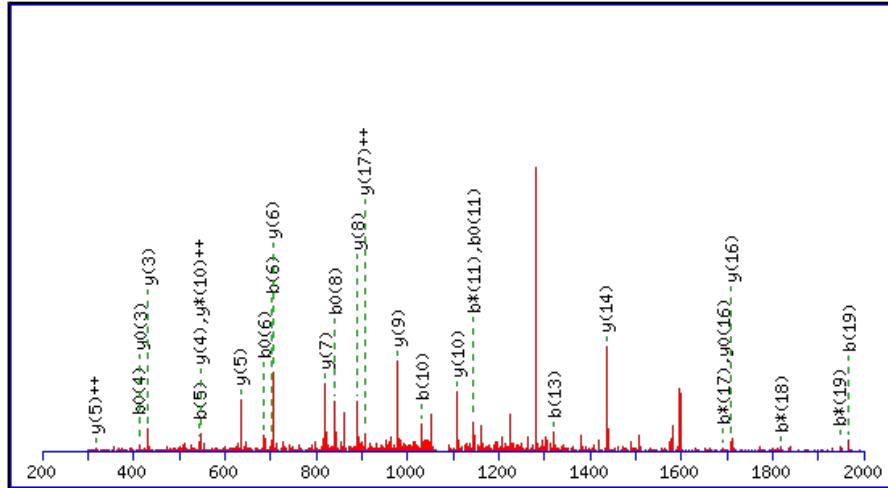

Monoisotopic mass of neutral peptide Mr(calc): 2138.9208

Fixed modifications: Carbamidomethyl (C) (apply to specified residues or termini only)

Variable modifications:

N14 : Deamidated (NQ)

Ions Score: 45 Expect: 0.0025

Matches : 28/206 fragment ions using 51 most intense peaks (help)

| #  | b         | b <sup>++</sup> | b <sup>*</sup> | b <sup>***</sup> | b <sup>0</sup> | b <sup>0++</sup> | Seq. | y         | y <sup>++</sup> | y <sup>*</sup> | y <sup>***</sup> | y <sup>0</sup> | y <sup>0++</sup> | #  |
|----|-----------|-----------------|----------------|------------------|----------------|------------------|------|-----------|-----------------|----------------|------------------|----------------|------------------|----|
| 1  | 114.0913  | 57.5493         |                |                  |                |                  | L    |           |                 |                |                  |                |                  | 20 |
| 2  | 215.1390  | 108.0731        |                |                  | 197.1285       | 99.0679          | T    | 2026.8441 | 1013.9257       | 2009.8175      | 1005.4124        | 2008.8335      | 1004.9204        | 19 |
| 3  | 330.1660  | 165.5866        |                |                  | 312.1554       | 156.5813         | D    | 1925.7964 | 963.4018        | 1908.7698      | 954.8886         | 1907.7858      | 954.3965         | 18 |
| 4  | 431.2136  | 216.1105        |                |                  | 413.2031       | 207.1052         | T    | 1810.7694 | 905.8884        | 1793.7429      | 897.3751         | 1792.7589      | 896.8831         | 17 |
| 5  | 544.2977  | 272.6525        |                |                  | 526.2871       | 263.6472         | I    | 1709.7218 | 855.3645        | 1692.6952      | 846.8512         | 1691.7112      | 846.3592         | 16 |
| 6  | 704.3284  | 352.6678        |                |                  | 686.3178       | 343.6625         | C    | 1596.6377 | 798.8225        | 1579.6111      | 790.3092         | 1578.6271      | 789.8172         | 15 |
| 7  | 761.3498  | 381.1785        |                |                  | 743.3393       | 372.1733         | G    | 1436.6070 | 718.8072        | 1419.5805      | 710.2939         | 1418.5965      | 709.8019         | 14 |
| 8  | 860.4182  | 430.7128        |                |                  | 842.4077       | 421.7075         | V    | 1379.5856 | 690.2964        | 1362.5590      | 681.7832         | 1361.5750      | 681.2911         | 13 |
| 9  | 917.4397  | 459.2235        |                |                  | 899.4291       | 450.2182         | G    | 1280.5172 | 640.7622        | 1263.4906      | 632.2489         | 1262.5066      | 631.7569         | 12 |
| 10 | 1031.4826 | 516.2449        | 1014.4561      | 507.7317         | 1013.4721      | 507.2397         | N    | 1223.4957 | 612.2515        | 1206.4692      | 603.7382         | 1205.4851      | 603.2462         | 11 |
| 11 | 1162.5231 | 581.7652        | 1145.4966      | 573.2519         | 1144.5125      | 572.7599         | M    | 1109.4528 | 555.2300        | 1092.4262      | 546.7168         | 1091.4422      | 546.2247         | 10 |
| 12 | 1249.5551 | 625.2812        | 1232.5286      | 616.7679         | 1231.5446      | 616.2759         | S    | 978.4123  | 489.7098        | 961.3857       | 481.1965         | 960.4017       | 480.7045         | 9  |
| 13 | 1320.5923 | 660.7998        | 1303.5657      | 652.2865         | 1302.5817      | 651.7945         | A    | 891.3803  | 446.1938        | 874.3537       | 437.6805         | 873.3697       | 437.1885         | 8  |
| 14 | 1435.6192 | 718.3132        | 1418.5926      | 709.8000         | 1417.6086      | 709.3080         | N    | 820.3432  | 410.6752        | 803.3166       | 402.1619         | 802.3326       | 401.6699         | 7  |
| 15 | 1506.6563 | 753.8318        | 1489.6298      | 745.3185         | 1488.6457      | 744.8265         | A    | 705.3162  | 353.1617        | 688.2897       | 344.6485         | 687.3056       | 344.1565         | 6  |
| 16 | 1593.6883 | 797.3478        | 1576.6618      | 788.8345         | 1575.6778      | 788.3425         | S    | 634.2791  | 317.6432        | 617.2525       | 309.1299         | 616.2685       | 308.6379         | 5  |
| 17 | 1708.7153 | 854.8613        | 1691.6887      | 846.3480         | 1690.7047      | 845.8560         | D    | 547.2471  | 274.1272        | 530.2205       | 265.6139         | 529.2365       | 265.1219         | 4  |
| 18 | 1836.7739 | 918.8906        | 1819.7473      | 910.3773         | 1818.7633      | 909.8853         | Q    | 432.2201  | 216.6137        | 415.1936       | 208.1004         | 414.2096       | 207.6084         | 3  |
| 19 | 1965.8164 | 983.4119        | 1948.7899      | 974.8986         | 1947.8059      | 974.4066         | E    | 304.1615  | 152.5844        | 287.1350       | 144.0711         | 286.1510       | 143.5791         | 2  |
| 20 |           |                 |                |                  |                |                  | R    | 175.1190  | 88.0631         | 158.0924       | 79.5498          |                |                  | 1  |

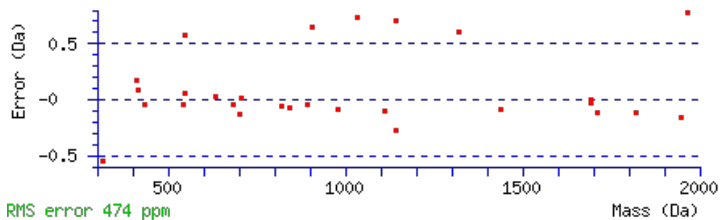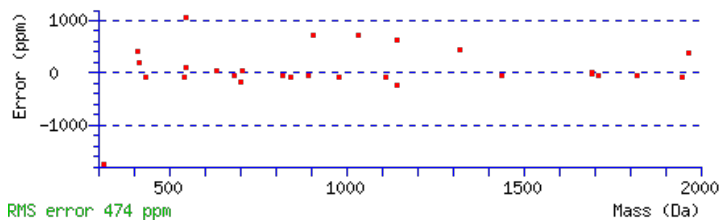

NCBI BLAST search of [LTDTICGVGNMSANASDQER](#)  
 (Parameters: blastp, nr protein database, expect=20000, no filter, PAM30)  
 Other BLAST [web gateways](#)

All matches to this query

| Score | Mr(calcd) | Delta   | Sequence                             | Site Analysis         |
|-------|-----------|---------|--------------------------------------|-----------------------|
| 44.6  | 2138.9208 | 1.0009  | <a href="#">LTDTICGVGNMSANASDQER</a> | Deamidated N14 84.75% |
| 36.5  | 2138.9208 | 1.0009  | <a href="#">LTDTICGVGNMSANASDQER</a> | Deamidated Q18 13.10% |
| 28.6  | 2138.9208 | 1.0009  | <a href="#">LTDTICGVGNMSANASDQER</a> | Deamidated N10 2.16%  |
| 6.3   | 2139.9167 | 0.0050  | <a href="#">DSGDGYGSHTLCAYNLGEPK</a> |                       |
| 1.2   | 2139.9160 | 0.0057  | <a href="#">QMEDEAKRSETMNAEQSR</a>   |                       |
| 0.2   | 2138.9240 | 0.9978  | <a href="#">SKTDWSNDEVVNRESDEK</a>   |                       |
| 0.0   | 2139.9320 | -0.0102 | <a href="#">QASWGSNEDGVEFWPKMR</a>   |                       |
| 0.0   | 2139.9320 | -0.0102 | <a href="#">QASWGSNEDGVEFWPKMR</a>   |                       |

Mascot: <http://www.matrixscience.com/>

# MASCOT SCIENCE Mascot Search Results

## Peptide View

MS/MS Fragmentation of **KIVLDPSGSMNIYLVLGSDSIGASNFTGAKK**

Found in **B4E1Z4** in **con\_Xuniprot\_HUMAN3**, B4E1Z4\_HUMAN Complement factor B OS=Homo sapiens GN=CFB PE=2 SV=1

Match to Query 27415: 3313.689136 from(829.429560,4+) intensity(31022.5352) rtinseconds(2038) scans(5141) index(23396)

Title: 111019\_Est\_MI\_YS\_G\_04Spectrum4438\_scans\_\_5141

Data file C:\mascot\20140703\_Tmgf\_1D\CSV\_UseAnalysis\MasterCSV\All\_Glyco\mgf\ptm\UC18ERLIC\_PTM\_35D.mgf

Click mouse within plot area to zoom in by factor of two about that point

Or, to Da

Label all possible matches Label matches used for scoring

Show Y-axis

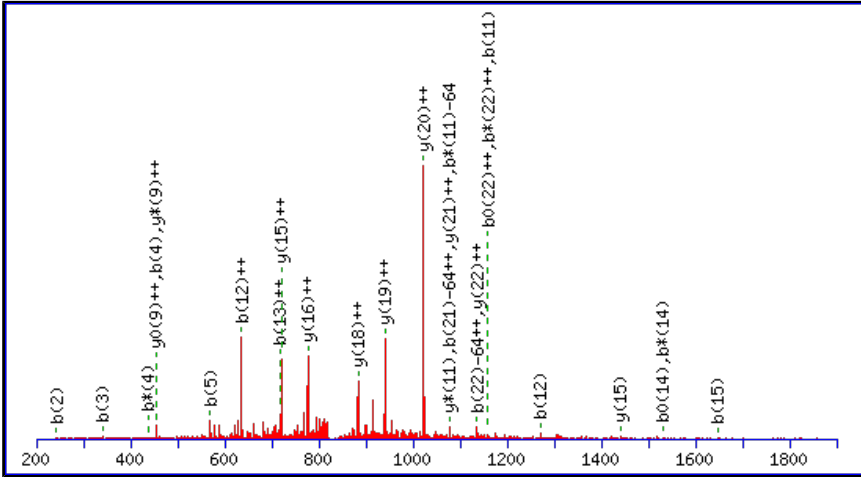

Monoisotopic mass of neutral peptide Mr(calc): 3313.6752

Fixed modifications: Carbamidomethyl (C) (apply to specified residues or termini only)

Variable modifications:

M10 : Oxidation (M), with neutral losses 0.0000(shown in table), 63.9983

N26 : Deamidated (NQ)

Ions Score: 38 Expect: 0.031

Matches : 28/542 fragment ions using 33 most intense peaks ([help](#))

| #  | b                | b <sup>++</sup> | b <sup>*</sup>   | b <sup>*++</sup> | b <sup>0</sup>   | b <sup>0++</sup> | Seq.     | y                | y <sup>++</sup>  | y <sup>*</sup>   | y <sup>*++</sup> | y <sup>0</sup> | y <sup>0++</sup> | #         |
|----|------------------|-----------------|------------------|------------------|------------------|------------------|----------|------------------|------------------|------------------|------------------|----------------|------------------|-----------|
| 1  | 129.1022         | 65.0548         | 112.0757         | 56.5415          |                  |                  | <b>K</b> |                  |                  |                  |                  |                |                  | <b>32</b> |
| 2  | <b>242.1863</b>  | 121.5968        | 225.1598         | 113.0835         |                  |                  | <b>I</b> | 3186.5875        | 1593.7974        | 3169.5609        | 1585.2841        | 3168.5769      | 1584.7921        | <b>31</b> |
| 3  | <b>341.2547</b>  | 171.1310        | 324.2282         | 162.6177         |                  |                  | <b>V</b> | 3073.5034        | 1537.2553        | 3056.4769        | 1528.7421        | 3055.4929      | 1528.2501        | <b>30</b> |
| 4  | <b>454.3388</b>  | 227.6730        | <b>437.3122</b>  | 219.1598         |                  |                  | <b>L</b> | 2974.4350        | 1487.7211        | 2957.4085        | 1479.2079        | 2956.4244      | 1478.7159        | <b>29</b> |
| 5  | <b>569.3657</b>  | 285.1865        | 552.3392         | 276.6732         | 551.3552         | 276.1812         | <b>D</b> | 2861.3509        | 1431.1791        | 2844.3244        | 1422.6658        | 2843.3404      | 1422.1738        | <b>28</b> |
| 6  | 666.4185         | 333.7129        | 649.3919         | 325.1996         | 648.4079         | 324.7076         | <b>P</b> | 2746.3240        | 1373.6656        | 2729.2975        | 1365.1524        | 2728.3134      | 1364.6604        | <b>27</b> |
| 7  | 753.4505         | 377.2289        | 736.4240         | 368.7156         | 735.4400         | 368.2236         | <b>S</b> | 2649.2712        | 1325.1393        | 2632.2447        | 1316.6260        | 2631.2607      | 1316.1340        | <b>26</b> |
| 8  | 810.4720         | 405.7396        | 793.4454         | 397.2264         | 792.4614         | 396.7343         | <b>G</b> | 2562.2392        | 1281.6232        | 2545.2127        | 1273.1100        | 2544.2286      | 1272.6180        | <b>25</b> |
| 9  | 897.5040         | 449.2556        | 880.4775         | 440.7424         | 879.4934         | 440.2504         | <b>S</b> | 2505.2177        | 1253.1125        | 2488.1912        | 1244.5992        | 2487.2072      | 1244.1072        | <b>24</b> |
| 10 | 1044.5394        | 522.7733        | 1027.5129        | 514.2601         | 1026.5288        | 513.7681         | <b>M</b> | 2418.1857        | 1209.5965        | 2401.1592        | 1201.0832        | 2400.1752      | 1200.5912        | <b>23</b> |
| 11 | <b>1158.5823</b> | 579.7948        | 1141.5558        | 571.2815         | 1140.5718        | 570.7895         | <b>N</b> | 2271.1503        | <b>1136.0788</b> | 2254.1238        | 1127.5655        | 2253.1398      | 1127.0735        | <b>22</b> |
| 12 | <b>1271.6664</b> | <b>636.3368</b> | 1254.6399        | 627.8236         | 1253.6558        | 627.3316         | <b>I</b> | 2157.1074        | <b>1079.0573</b> | 2140.0808        | 1070.5441        | 2139.0968      | 1070.0521        | <b>21</b> |
| 13 | 1434.7297        | <b>717.8685</b> | 1417.7032        | 709.3552         | 1416.7192        | 708.8632         | <b>Y</b> | 2044.0233        | <b>1022.5153</b> | 2026.9968        | 1014.0020        | 2026.0128      | 1013.5100        | <b>20</b> |
| 14 | 1547.8138        | 774.4105        | <b>1530.7872</b> | 765.8973         | <b>1529.8032</b> | 765.4053         | <b>L</b> | 1880.9600        | <b>940.9836</b>  | 1863.9335        | 932.4704         | 1862.9494      | 931.9784         | <b>19</b> |
| 15 | <b>1646.8822</b> | 823.9447        | 1629.8557        | 815.4315         | 1628.8716        | 814.9395         | <b>V</b> | 1767.8759        | <b>884.4416</b>  | 1750.8494        | 875.9283         | 1749.8654      | 875.4363         | <b>18</b> |
| 16 | 1759.9663        | 880.4868        | 1742.9397        | 871.9735         | 1741.9557        | 871.4815         | <b>L</b> | 1668.8075        | 834.9074         | 1651.7810        | 826.3941         | 1650.7970      | 825.9021         | <b>17</b> |
| 17 | 1874.9932        | 938.0002        | 1857.9667        | 929.4870         | 1856.9826        | 928.9950         | <b>D</b> | 1555.7235        | <b>778.3654</b>  | 1538.6969        | 769.8521         | 1537.7129      | 769.3601         | <b>16</b> |
| 18 | 1932.0147        | 966.5110        | 1914.9881        | 957.9977         | 1914.0041        | 957.5057         | <b>G</b> | <b>1440.6965</b> | <b>720.8519</b>  | 1423.6700        | 712.3386         | 1422.6859      | 711.8466         | <b>15</b> |
| 19 | 2019.0467        | 1010.0270       | 2002.0202        | 1001.5137        | 2001.0361        | 1001.0217        | <b>S</b> | 1383.6751        | 692.3412         | 1366.6485        | 683.8279         | 1365.6645      | 683.3359         | <b>14</b> |
| 20 | 2134.0736        | 1067.5405       | 2117.0471        | 1059.0272        | 2116.0631        | 1058.5352        | <b>D</b> | 1296.6430        | 648.8251         | 1279.6165        | 640.3119         | 1278.6325      | 639.8199         | <b>13</b> |
| 21 | 2221.1057        | 1111.0565       | 2204.0791        | 1102.5432        | 2203.0951        | 1102.0512        | <b>S</b> | 1181.6161        | 591.3117         | 1164.5895        | 582.7984         | 1163.6055      | 582.3064         | <b>12</b> |
| 22 | 2334.1897        | 1167.5985       | 2317.1632        | <b>1159.0852</b> | 2316.1792        | <b>1158.5932</b> | <b>I</b> | 1094.5841        | 547.7957         | <b>1077.5575</b> | 539.2824         | 1076.5735      | 538.7904         | <b>11</b> |

|    |           |           |           |           |           |           |   |          |          |          |          |          |          |    |
|----|-----------|-----------|-----------|-----------|-----------|-----------|---|----------|----------|----------|----------|----------|----------|----|
| 23 | 2391.2112 | 1196.1092 | 2374.1847 | 1187.5960 | 2373.2006 | 1187.1040 | G | 981.5000 | 491.2536 | 964.4734 | 482.7404 | 963.4894 | 482.2483 | 10 |
| 24 | 2462.2483 | 1231.6278 | 2445.2218 | 1223.1145 | 2444.2378 | 1222.6225 | A | 924.4785 | 462.7429 | 907.4520 | 454.2296 | 906.4680 | 453.7376 | 9  |
| 25 | 2549.2803 | 1275.1438 | 2532.2538 | 1266.6305 | 2531.2698 | 1266.1385 | S | 853.4414 | 427.2243 | 836.4149 | 418.7111 | 835.4308 | 418.2191 | 8  |
| 26 | 2664.3073 | 1332.6573 | 2647.2807 | 1324.1440 | 2646.2967 | 1323.6520 | N | 766.4094 | 383.7083 | 749.3828 | 375.1951 | 748.3988 | 374.7030 | 7  |
| 27 | 2811.3757 | 1406.1915 | 2794.3492 | 1397.6782 | 2793.3651 | 1397.1862 | F | 651.3824 | 326.1949 | 634.3559 | 317.6816 | 633.3719 | 317.1896 | 6  |
| 28 | 2912.4234 | 1456.7153 | 2895.3968 | 1448.2021 | 2894.4128 | 1447.7100 | T | 504.3140 | 252.6606 | 487.2875 | 244.1474 | 486.3035 | 243.6554 | 5  |
| 29 | 2969.4448 | 1485.2261 | 2952.4183 | 1476.7128 | 2951.4343 | 1476.2208 | G | 403.2663 | 202.1368 | 386.2398 | 193.6235 |          |          | 4  |
| 30 | 3040.4820 | 1520.7446 | 3023.4554 | 1512.2313 | 3022.4714 | 1511.7393 | A | 346.2449 | 173.6261 | 329.2183 | 165.1128 |          |          | 3  |
| 31 | 3168.5769 | 1584.7921 | 3151.5504 | 1576.2788 | 3150.5664 | 1575.7868 | K | 275.2078 | 138.1075 | 258.1812 | 129.5942 |          |          | 2  |
| 32 |           |           |           |           |           |           | K | 147.1128 | 74.0600  | 130.0863 | 65.5468  |          |          | 1  |

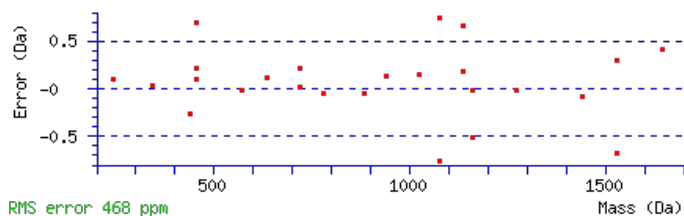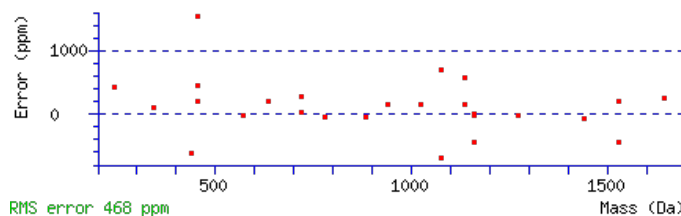

NCBI BLAST search of [KIVLDPSGSMNIYLVLDGSDSIGASNFTGAKK](#)

(Parameters: blastp, nr protein database, expect=20000, no filter, PAM30)

Other BLAST [web gateways](#)

All matches to this query

| Score | Mr(calc)  | Delta  | Sequence                                         | Site Analysis         |
|-------|-----------|--------|--------------------------------------------------|-----------------------|
| 38.4  | 3313.6752 | 0.0140 | <a href="#">KIVLDPSGSMNIYLVLDGSDSIGASNFTGAKK</a> | Deamidated N26 82.88% |
| 36.4  | 3312.6911 | 0.9980 | <a href="#">KIVLDPSGSMNIYLVLDGSDSIGASNFTGAKK</a> |                       |
| 31.5  | 3313.6752 | 0.0140 | <a href="#">KIVLDPSGSMNIYLVLDGSDSIGASNFTGAKK</a> | Deamidated N11 17.12% |
| 14.4  | 3311.6972 | 1.9919 | <a href="#">DPELFLGLASNILNFTSSMLNSRNNFIR</a>     |                       |
| 14.4  | 3312.6812 | 1.0079 | <a href="#">DPELFLGLASNILNFTSSMLNSRNNFIR</a>     |                       |
| 14.4  | 3312.6812 | 1.0079 | <a href="#">DPELFLGLASNILNFTSSMLNSRNNFIR</a>     |                       |
| 14.4  | 3312.6812 | 1.0079 | <a href="#">DPELFLGLASNILNFTSSMLNSRNNFIR</a>     |                       |
| 12.1  | 3313.6874 | 0.0017 | <a href="#">AWTGATMQMMLYINVEISMPLLPAPVK</a>      |                       |
| 9.6   | 3312.6812 | 1.0079 | <a href="#">DPELFLGLASNILNFTSSMLNSRNNFIR</a>     |                       |
| 9.0   | 3312.6812 | 1.0079 | <a href="#">DPELFLGLASNILNFTSSMLNSRNNFIR</a>     |                       |

Mascot: <http://www.matrixscience.com/>

# MATRIX SCIENCE Mascot Search Results

## Peptide View

MS/MS Fragmentation of **KALQAVYSMMSWPDDVPEGWNR**

Found in **B4E1Z4** in **con\_Xuniprot\_HUMAN3**, B4E1Z4\_HUMAN Complement factor B OS=Homo sapiens GN=CFB PE=2 SV=1

Match to Query 25365: 2709.227352 from(904.083060,3+) intensity(9010.7939) rtinseconds(1555) scans(3894) index(24529)

Title: 111019\_Est\_MI\_YS\_G\_06Spectrum3376\_scans\_\_3894

Data file C:\mascot\20140703\_Tmgf\_1D\CSV\_UseAnalysis\MasterCSV\All\_Glyco\mgf\ptm\UC18ERLIC\_PTM\_35D.mgf

Click mouse within plot area to zoom in by factor of two about that point

Or, to Da

Label all possible matches Label matches used for scoring

Show Y-axis

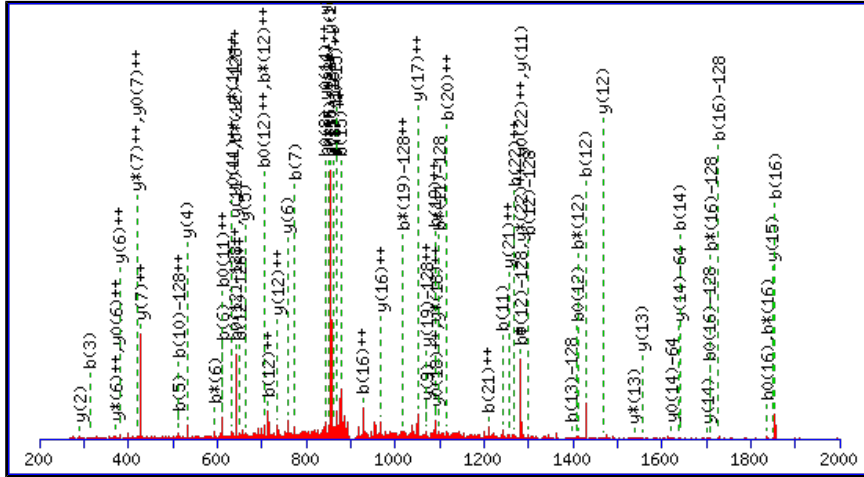

Monoisotopic mass of neutral peptide Mr(calc): 2709.2203

Fixed modifications: Carbamidomethyl (C) (apply to specified residues or termini only)

Variable modifications:

M9 : Oxidation (M), with neutral losses 0.0000 (shown in table), 63.9983

M10 : Oxidation (M), with neutral losses 0.0000 (shown in table), 63.9983

N22 : Deamidated (NQ)

Ions Score: 36 Expect: 0.043

Matches : 77/380 fragment ions using 163 most intense peaks ([help](#))

| #  | b                | b <sup>++</sup>  | b <sup>*</sup>   | b <sup>*++</sup> | b <sup>0</sup>   | b <sup>0++</sup> | Seq. | y                | y <sup>++</sup>  | y <sup>*</sup>   | y <sup>*++</sup> | y <sup>0</sup> | y <sup>0++</sup> | #  |
|----|------------------|------------------|------------------|------------------|------------------|------------------|------|------------------|------------------|------------------|------------------|----------------|------------------|----|
| 1  | 129.1022         | 65.0548          | 112.0757         | 56.5415          |                  |                  | K    |                  |                  |                  |                  |                |                  | 23 |
| 2  | 200.1394         | 100.5733         | 183.1128         | 92.0600          |                  |                  | A    | 2582.1326        | 1291.5700        | 2565.1061        | 1283.0567        | 2564.1221      | 1282.5647        | 22 |
| 3  | <b>313.2234</b>  | 157.1153         | 296.1969         | 148.6021         |                  |                  | L    | 2511.0955        | <b>1256.0514</b> | 2494.0690        | 1247.5381        | 2493.0850      | 1247.0461        | 21 |
| 4  | 441.2820         | 221.1446         | 424.2554         | 212.6314         |                  |                  | Q    | 2398.0115        | 1199.5094        | 2380.9849        | 1190.9961        | 2380.0009      | 1190.5041        | 20 |
| 5  | <b>512.3191</b>  | 256.6632         | 495.2926         | 248.1499         |                  |                  | A    | 2269.9529        | 1135.4801        | 2252.9263        | 1126.9668        | 2251.9423      | 1126.4748        | 19 |
| 6  | <b>611.3875</b>  | 306.1974         | <b>594.3610</b>  | 297.6841         |                  |                  | V    | 2198.9158        | 1099.9615        | 2181.8892        | <b>1091.4482</b> | 2180.9052      | <b>1090.9562</b> | 18 |
| 7  | <b>774.4509</b>  | 387.7291         | 757.4243         | 379.2158         |                  |                  | Y    | 2099.8474        | <b>1050.4273</b> | 2082.8208        | 1041.9140        | 2081.8368      | 1041.4220        | 17 |
| 8  | <b>861.4829</b>  | 431.2451         | 844.4563         | 422.7318         | <b>843.4723</b>  | 422.2398         | S    | 1936.7840        | <b>968.8957</b>  | 1919.7575        | 960.3824         | 1918.7735      | 959.8904         | 16 |
| 9  | 1008.5183        | 504.7628         | 991.4917         | 496.2495         | 990.5077         | 495.7575         | M    | <b>1849.7520</b> | 925.3796         | 1832.7254        | 916.8664         | 1831.7414      | 916.3744         | 15 |
| 10 | 1155.5537        | 578.2805         | 1138.5271        | 569.7672         | 1137.5431        | 569.2752         | M    | <b>1702.7166</b> | <b>851.8619</b>  | 1685.6900        | <b>843.3487</b>  | 1684.7060      | <b>842.8567</b>  | 14 |
| 11 | <b>1242.5857</b> | 621.7965         | 1225.5592        | 613.2832         | 1224.5751        | <b>612.7912</b>  | S    | <b>1555.6812</b> | 778.3442         | <b>1538.6546</b> | 769.8310         | 1537.6706      | 769.3390         | 13 |
| 12 | <b>1428.6650</b> | <b>714.8361</b>  | <b>1411.6385</b> | <b>706.3229</b>  | <b>1410.6545</b> | <b>705.8309</b>  | W    | <b>1468.6492</b> | <b>734.8282</b>  | 1451.6226        | 726.3149         | 1450.6386      | 725.8229         | 12 |
| 13 | 1525.7178        | 763.3625         | 1508.6912        | 754.8493         | 1507.7072        | 754.3572         | P    | <b>1282.5699</b> | <b>641.7886</b>  | 1265.5433        | <b>633.2753</b>  | 1264.5593      | <b>632.7833</b>  | 11 |
| 14 | <b>1640.7447</b> | 820.8760         | 1623.7182        | 812.3627         | 1622.7342        | 811.8707         | D    | 1185.5171        | 593.2622         | 1168.4905        | 584.7489         | 1167.5065      | 584.2569         | 10 |
| 15 | 1755.7717        | <b>878.3895</b>  | 1738.7451        | 869.8762         | 1737.7611        | <b>869.3842</b>  | D    | <b>1070.4902</b> | 535.7487         | 1053.4636        | 527.2354         | 1052.4796      | 526.7434         | 9  |
| 16 | <b>1854.8401</b> | <b>927.9237</b>  | <b>1837.8135</b> | 919.4104         | <b>1836.8295</b> | 918.9184         | V    | 955.4632         | 478.2352         | 938.4367         | 469.7220         | 937.4526       | 469.2300         | 8  |
| 17 | 1951.8928        | 976.4501         | 1934.8663        | 967.9368         | 1933.8823        | 967.4448         | P    | <b>856.3948</b>  | <b>428.7010</b>  | 839.3682         | <b>420.1878</b>  | 838.3842       | <b>419.6958</b>  | 7  |
| 18 | 2048.9456        | 1024.9764        | 2031.9191        | 1016.4632        | 2030.9350        | 1015.9712        | P    | <b>759.3420</b>  | <b>380.1747</b>  | 742.3155         | <b>371.6614</b>  | 741.3315       | <b>371.1694</b>  | 6  |
| 19 | 2177.9882        | <b>1089.4977</b> | 2160.9617        | 1080.9845        | 2159.9776        | 1080.4925        | E    | <b>662.2893</b>  | 331.6483         | 645.2627         | 323.1350         | 644.2787       | 322.6430         | 5  |
| 20 | 2235.0097        | <b>1118.0085</b> | 2217.9831        | 1109.4952        | 2216.9991        | 1109.0032        | G    | <b>533.2467</b>  | 267.1270         | 516.2201         | 258.6137         |                |                  | 4  |
| 21 | 2421.0890        | <b>1211.0481</b> | 2404.0624        | 1202.5349        | 2403.0784        | 1202.0428        | W    | 476.2252         | 238.6162         | 459.1987         | 230.1030         |                |                  | 3  |
| 22 | 2536.1159        | <b>1268.5616</b> | 2519.0894        | 1260.0483        | 2518.1054        | 1259.5563        | N    | <b>290.1459</b>  | 145.5766         | 273.1193         | 137.0633         |                |                  | 2  |

|    |  |  |  |  |  |  |   |          |         |          |         |  |  |   |
|----|--|--|--|--|--|--|---|----------|---------|----------|---------|--|--|---|
| 23 |  |  |  |  |  |  | R | 175.1190 | 88.0631 | 158.0924 | 79.5498 |  |  | 1 |
|----|--|--|--|--|--|--|---|----------|---------|----------|---------|--|--|---|

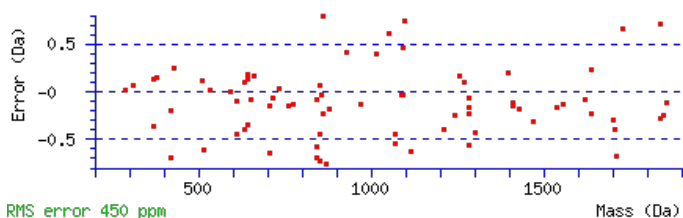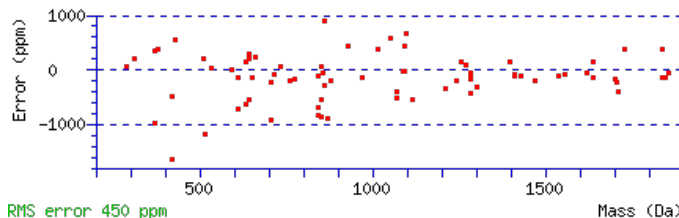

NCBI BLAST search of [KALQAVYSMMSWPDDVPPEGWNR](#)

(Parameters: blastp, nr protein database, expect=20000, no filter, PAM30)

Other BLAST [web gateways](#)

All matches to this query

| Score | Mr(calc)  | Delta   | Sequence                                  | Site Analysis         |
|-------|-----------|---------|-------------------------------------------|-----------------------|
| 35.8  | 2709.2203 | 0.0070  | <a href="#">KALQAVYSMMSWPDDVPPEGWNR</a>   | Deamidated N22 98.98% |
| 20.5  | 2708.2363 | 0.9911  | <a href="#">KALQAVYSMMSWPDDVPPEGWNR</a>   |                       |
| 16.0  | 2709.2203 | 0.0070  | <a href="#">KALQAVYSMMSWPDDVPPEGWNR</a>   | Deamidated Q4 1.02%   |
| 4.8   | 2708.2118 | 1.0155  | <a href="#">YGRPCVCRYSGRTNECIQNYR</a>     |                       |
| 3.9   | 2707.2258 | 2.0015  | <a href="#">TGCSLMGASVDSTLAENTYVHFQGK</a> |                       |
| 2.8   | 2709.2329 | -0.0055 | <a href="#">QYQHNLNASFWFQRCAGCTHLK</a>    |                       |
| 2.8   | 2709.2329 | -0.0055 | <a href="#">QYQHNLNASFWFQRCAGCTHLK</a>    |                       |
| 2.3   | 2709.2329 | -0.0055 | <a href="#">QYQHNLNASFWFQRCAGCTHLK</a>    |                       |
| 2.1   | 2709.2203 | 0.0070  | <a href="#">RYYDEVEAEGYVKHDCVGYVMK</a>    |                       |
| 1.5   | 2708.2301 | 0.9973  | <a href="#">QQEETHVQVADPVIGPTSEQGNVDK</a> |                       |

Mascot: <http://www.matrixscience.com/>

# MASCOT SCIENCE Mascot Search Results

## Peptide View

MS/MS Fragmentation of **AEMLNVS**K

Found in **B5MCY1** in **con\_Xuniprot\_HUMAN3**, TDR15\_HUMAN Tudor domain-containing protein 15 OS=Homo sapiens  
GN=TDRD15 PE=2 SV=1

Match to Query 13: 907.431128 from(454.722840,2+) intensity(60855.0234) rtinseconds(804) scans(1833) index(13555)

Title: 111019\_Est\_ISCardio\_NMI\_YS\_G\_15Spectrum1581\_scans\_\_1833

Data file C:\mascot\20140703\_Tmgf\_1D\CSV\_UseAnalysis\MasterCSV\All\_Glyco\mgf\ptm\UC18ERLIC\_PTM\_35D.mgf

Click mouse within plot area to zoom in by factor of two about that point

Or, to Da

Label all possible matches Label matches used for scoring

Show Y-axis

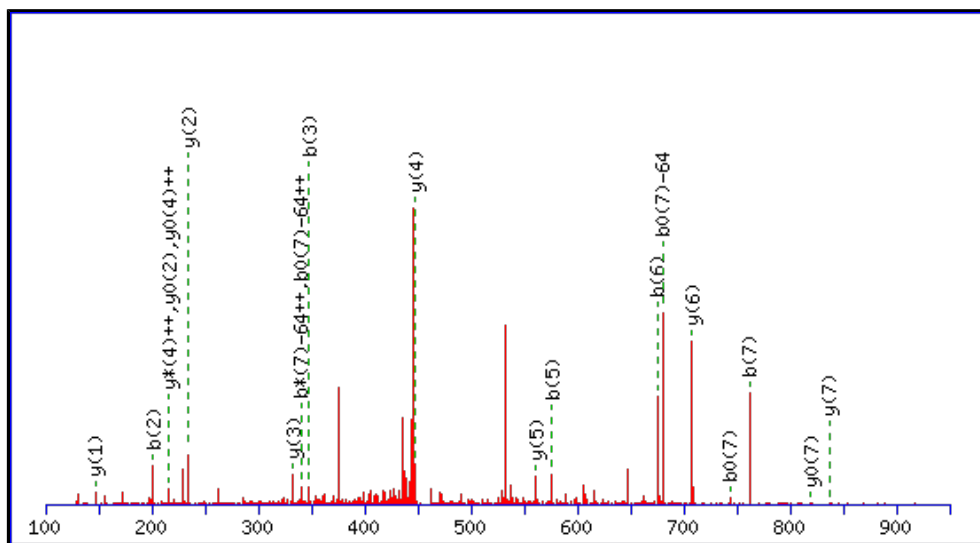

Monoisotopic mass of neutral peptide **Mr(calc)**: 907.4321

Fixed modifications: Carbamidomethyl (C) (apply to specified residues or termini only)

Variable modifications:

M3 : Oxidation (M), with neutral losses 0.0000 (shown in table), 63.9983

N5 : Deamidated (NQ)

Ions Score: 45 Expect: 0.0048

Matches : 20/110 fragment ions using 32 most intense peaks ([help](#))

| # | b               | b <sup>++</sup> | b*       | b <sup>+++</sup> | b <sup>0</sup>  | b <sup>0++</sup> | Seq. | y               | y <sup>++</sup> | y*       | y <sup>+++</sup> | y <sup>0</sup>  | y <sup>0++</sup> | # |
|---|-----------------|-----------------|----------|------------------|-----------------|------------------|------|-----------------|-----------------|----------|------------------|-----------------|------------------|---|
| 1 | 72.0444         | 36.5258         |          |                  |                 |                  | A    |                 |                 |          |                  |                 |                  | 8 |
| 2 | <b>201.0870</b> | 101.0471        |          |                  | 183.0764        | 92.0418          | E    | <b>837.4022</b> | 419.2048        | 820.3757 | 410.6915         | <b>819.3917</b> | 410.1995         | 7 |
| 3 | <b>348.1224</b> | 174.5648        |          |                  | 330.1118        | 165.5595         | M    | <b>708.3597</b> | 354.6835        | 691.3331 | 346.1702         | 690.3491        | 345.6782         | 6 |
| 4 | 461.2064        | 231.1069        |          |                  | 443.1959        | 222.1016         | L    | <b>561.3243</b> | 281.1658        | 544.2977 | 272.6525         | 543.3137        | 272.1605         | 5 |
| 5 | <b>576.2334</b> | 288.6203        | 559.2068 | 280.1071         | 558.2228        | 279.6151         | N    | <b>448.2402</b> | 224.6237        | 431.2136 | <b>216.1105</b>  | 430.2296        | <b>215.6184</b>  | 4 |
| 6 | <b>675.3018</b> | 338.1545        | 658.2753 | 329.6413         | 657.2912        | 329.1493         | V    | <b>333.2132</b> | 167.1103        | 316.1867 | 158.5970         | 315.2027        | 158.1050         | 3 |
| 7 | <b>762.3338</b> | 381.6706        | 745.3073 | 373.1573         | <b>744.3233</b> | 372.6653         | S    | <b>234.1448</b> | 117.5761        | 217.1183 | 109.0628         | <b>216.1343</b> | 108.5708         | 2 |
| 8 |                 |                 |          |                  |                 |                  | K    | <b>147.1128</b> | 74.0600         | 130.0863 | 65.5468          |                 |                  | 1 |

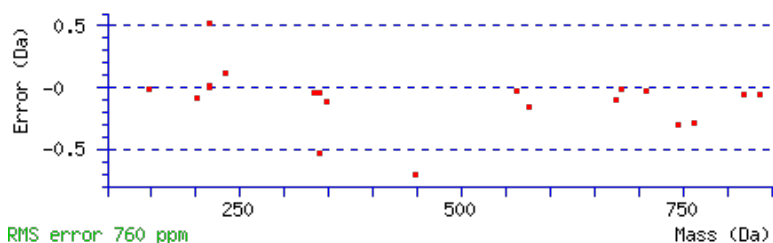



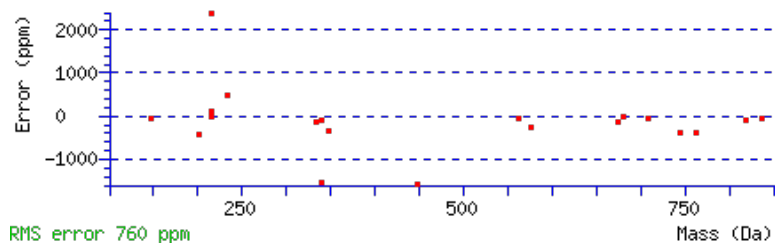

NCBI **BLAST** search of [AEMLNVSK](#)

(Parameters: blastp, nr protein database, expect=20000, no filter, PAM30)

Other BLAST [web gateways](#)

**All matches to this query**

| Score | Mr(calc) | Delta   | Sequence                  |
|-------|----------|---------|---------------------------|
| 45.3  | 907.4321 | -0.0009 | <a href="#">AEMLNVSK</a>  |
| 25.7  | 907.4287 | 0.0025  | <a href="#">LNFEANAK</a>  |
| 24.3  | 907.4321 | -0.0009 | <a href="#">DLMINASK</a>  |
| 21.5  | 907.4287 | 0.0024  | <a href="#">ANFIEADK</a>  |
| 21.5  | 907.4321 | -0.0009 | <a href="#">AQMLTEAK</a>  |
| 13.4  | 907.4321 | -0.0009 | <a href="#">DLMKEQK</a>   |
| 13.3  | 907.4321 | -0.0009 | <a href="#">QVAEMSVK</a>  |
| 13.0  | 905.4277 | 2.0035  | <a href="#">SGPAQTAMK</a> |
| 12.4  | 907.4287 | 0.0024  | <a href="#">INFQEEK</a>   |
| 12.0  | 907.4295 | 0.0016  | <a href="#">EAMMLWK</a>   |

Mascot: <http://www.matrixscience.com/>

# MASCOT SCIENCE Mascot Search Results

## Peptide View

MS/MS Fragmentation of **VDKDLQSLEDILHQVENK**

Found in **C9JC84** in **con\_Xuniprot\_HUMAN3**, C9JC84\_HUMAN Fibrinogen gamma chain OS=Homo sapiens GN=FGG PE=2 SV=1

Match to Query 14239: 2123.084988 from(1062.549770,2+) intensity(28118.3418) rtinseconds(2326) scans(5660) index(16981)

Title: 111019\_Est\_MI\_YP\_G\_06Spectrum4707\_scans\_5660

Data file C:\mascot\20140703\_Tmgf\_1D\CSV\_UseAnalysis\MasterCSV\All\_Glyco\mgf\ptm\UC18ERLIC\_PTM\_35D.mgf

Click mouse within plot area to zoom in by factor of two about that point

Or, to Da

Label all possible matches Label matches used for scoring

Show Y-axis

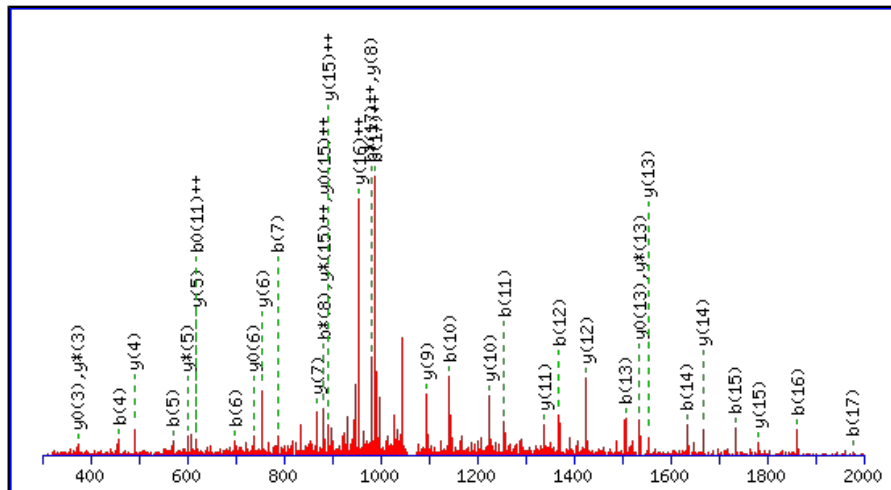

Monoisotopic mass of neutral peptide Mr(calc): 2123.0746

Fixed modifications: Carbamidomethyl (C) (apply to specified residues or termini only)

Variable modifications:

N17 : Deamidated (NQ)

Ions Score: 97 Expect: 5.1e-008

Matches : 38/194 fragment ions using 51 most intense peaks (help)

| #  | b         | b <sup>++</sup> | b*        | b <sup>+++</sup> | b <sup>0</sup> | b <sup>0++</sup> | Seq. | y         | y <sup>++</sup> | y*        | y <sup>+++</sup> | y <sup>0</sup> | y <sup>0++</sup> | #  |
|----|-----------|-----------------|-----------|------------------|----------------|------------------|------|-----------|-----------------|-----------|------------------|----------------|------------------|----|
| 1  | 100.0757  | 50.5415         |           |                  |                |                  | V    |           |                 |           |                  |                |                  | 18 |
| 2  | 215.1026  | 108.0550        |           |                  | 197.0921       | 99.0497          | D    | 2025.0135 | 1013.0104       | 2007.9869 | 1004.4971        | 2007.0029      | 1004.0051        | 17 |
| 3  | 343.1976  | 172.1024        | 326.1710  | 163.5892         | 325.1870       | 163.0972         | K    | 1909.9865 | 955.4969        | 1892.9600 | 946.9836         | 1891.9760      | 946.4916         | 16 |
| 4  | 458.2245  | 229.6159        | 441.1980  | 221.1026         | 440.2140       | 220.6106         | D    | 1781.8916 | 891.4494        | 1764.8650 | 882.9362         | 1763.8810      | 882.4441         | 15 |
| 5  | 571.3086  | 286.1579        | 554.2821  | 277.6447         | 553.2980       | 277.1527         | L    | 1666.8646 | 833.9360        | 1649.8381 | 825.4227         | 1648.8541      | 824.9307         | 14 |
| 6  | 699.3672  | 350.1872        | 682.3406  | 341.6740         | 681.3566       | 341.1819         | Q    | 1553.7806 | 777.3939        | 1536.7540 | 768.8807         | 1535.7700      | 768.3886         | 13 |
| 7  | 786.3992  | 393.7032        | 769.3727  | 385.1900         | 768.3886       | 384.6980         | S    | 1425.7220 | 713.3646        | 1408.6955 | 704.8514         | 1407.7114      | 704.3594         | 12 |
| 8  | 899.4833  | 450.2453        | 882.4567  | 441.7320         | 881.4727       | 441.2400         | L    | 1338.6900 | 669.8486        | 1321.6634 | 661.3353         | 1320.6794      | 660.8433         | 11 |
| 9  | 1028.5259 | 514.7666        | 1011.4993 | 506.2533         | 1010.5153      | 505.7613         | E    | 1225.6059 | 613.3066        | 1208.5794 | 604.7933         | 1207.5953      | 604.3013         | 10 |
| 10 | 1143.5528 | 572.2800        | 1126.5263 | 563.7668         | 1125.5422      | 563.2748         | D    | 1096.5633 | 548.7853        | 1079.5368 | 540.2720         | 1078.5528      | 539.7800         | 9  |
| 11 | 1256.6369 | 628.8221        | 1239.6103 | 620.3088         | 1238.6263      | 619.8168         | I    | 981.5364  | 491.2718        | 964.5098  | 482.7585         | 963.5258       | 482.2665         | 8  |
| 12 | 1369.7209 | 685.3641        | 1352.6944 | 676.8508         | 1351.7104      | 676.3588         | L    | 868.4523  | 434.7298        | 851.4258  | 426.2165         | 850.4417       | 425.7245         | 7  |
| 13 | 1506.7798 | 753.8936        | 1489.7533 | 745.3803         | 1488.7693      | 744.8883         | H    | 755.3682  | 378.1878        | 738.3417  | 369.6745         | 737.3577       | 369.1825         | 6  |
| 14 | 1634.8384 | 817.9229        | 1617.8119 | 809.4096         | 1616.8279      | 808.9176         | Q    | 618.3093  | 309.6583        | 601.2828  | 301.1450         | 600.2988       | 300.6530         | 5  |
| 15 | 1733.9068 | 867.4571        | 1716.8803 | 858.9438         | 1715.8963      | 858.4518         | V    | 490.2508  | 245.6290        | 473.2242  | 237.1157         | 472.2402       | 236.6237         | 4  |
| 16 | 1862.9494 | 931.9784        | 1845.9229 | 923.4651         | 1844.9389      | 922.9731         | E    | 391.1823  | 196.0948        | 374.1558  | 187.5815         | 373.1718       | 187.0895         | 3  |
| 17 | 1977.9764 | 989.4918        | 1960.9498 | 980.9786         | 1959.9658      | 980.4865         | N    | 262.1397  | 131.5735        | 245.1132  | 123.0602         |                |                  | 2  |
| 18 |           |                 |           |                  |                |                  | K    | 147.1128  | 74.0600         | 130.0863  | 65.5468          |                |                  | 1  |

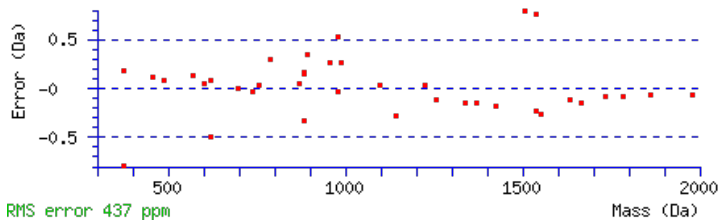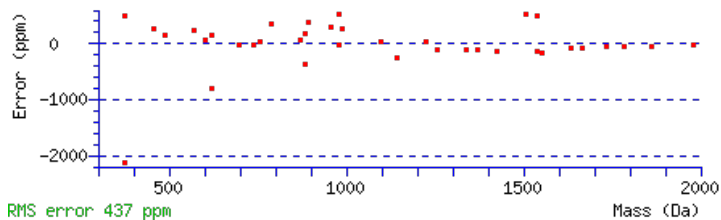

NCBI BLAST search of [VDKDLQSLEDILHQVENK](#)

(Parameters: blastp, nr protein database, expect=20000, no filter, PAM30)

Other BLAST [web gateways](#)

All matches to this query

| Score | Mr(calcd) | Delta   | Sequence                              | Site Analysis         |
|-------|-----------|---------|---------------------------------------|-----------------------|
| 97.0  | 2123.0746 | 0.0104  | <a href="#">VDKDLQSLEDILHQVENK</a>    | Deamidated N17 96.93% |
| 82.0  | 2123.0746 | 0.0104  | <a href="#">VDKDLQSLEDILHQVENK</a>    | Deamidated Q14 3.07%  |
| 52.4  | 2123.0746 | 0.0104  | <a href="#">VDKDLQSLEDILHQVENK</a>    | Deamidated Q6 0.00%   |
| 43.1  | 2122.0906 | 0.9944  | <a href="#">VDKDLQSLEDILHQVENK</a>    |                       |
| 17.3  | 2123.0932 | -0.0082 | <a href="#">QVETIRNLVDSYMSIINK</a>    |                       |
| 10.6  | 2123.0755 | 0.0095  | <a href="#">VQNVEAGKGCVAADVYSMVLK</a> |                       |
| 10.6  | 2123.0755 | 0.0095  | <a href="#">VQNVEAGKGCVAADVYSMVLK</a> |                       |
| 7.3   | 2123.0899 | -0.0049 | <a href="#">SQYQTVRYDILPLSPVSR</a>    |                       |
| 7.2   | 2123.0932 | -0.0082 | <a href="#">QVETIRNLVDSYMSIINK</a>    |                       |
| 4.8   | 2122.0715 | 1.0135  | <a href="#">TVATSGNMQAVELLSTLEK</a>   |                       |

Mascot: <http://www.matrixscience.com/>

# MASCOT SCIENCE Mascot Search Results

## Peptide View

MS/MS Fragmentation of **VDKDLQSLEDILHQVENK**

Found in **C9JC84** in **con\_Xuniprot\_HUMAN3**, C9JC84\_HUMAN Fibrinogen gamma chain OS=Homo sapiens GN=FGG PE=2 SV=1

Match to Query 14253: 2124.065828 from(1063.040190,2+) intensity(32723.9844) rtinseconds(2212) scans(5507) index(15332)

Title: 111019\_Est\_MI\_YP\_G\_04Spectrum4748\_scans\_5507

Data file C:\mascot\20140703\_Tmgf\_1D\CSV\_UseAnalysis\MasterCSV\All\_Glyco\mgf\ptm\UC18ERLIC\_PTM\_35D.mgf

Click mouse within plot area to zoom in by factor of two about that point

Or, to Da

Label all possible matches Label matches used for scoring

Show Y-axis

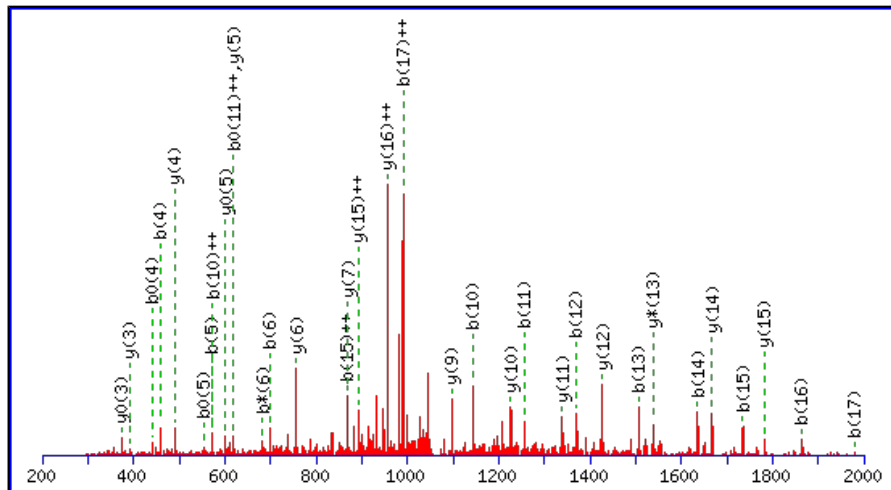

Monoisotopic mass of neutral peptide Mr(calc): 2124.0586

Fixed modifications: Carbamidomethyl (C) (apply to specified residues or termini only)

Variable modifications:

Q14 : Deamidated (NQ)

N17 : Deamidated (NQ)

Ions Score: 89 Expect: 3.7e-007

Matches : 34/194 fragment ions using 51 most intense peaks ([help](#))

| #  | b         | b <sup>++</sup> | b <sup>*</sup> | b <sup>*++</sup> | b <sup>0</sup> | b <sup>0++</sup> | Seq. | y         | y <sup>++</sup> | y <sup>*</sup> | y <sup>*++</sup> | y <sup>0</sup> | y <sup>0++</sup> | #  |
|----|-----------|-----------------|----------------|------------------|----------------|------------------|------|-----------|-----------------|----------------|------------------|----------------|------------------|----|
| 1  | 100.0757  | 50.5415         |                |                  |                |                  | V    |           |                 |                |                  |                |                  | 18 |
| 2  | 215.1026  | 108.0550        |                |                  | 197.0921       | 99.0497          | D    | 2025.9975 | 1013.5024       | 2008.9710      | 1004.9891        | 2007.9869      | 1004.4971        | 17 |
| 3  | 343.1976  | 172.1024        | 326.1710       | 163.5892         | 325.1870       | 163.0972         | K    | 1910.9706 | 955.9889        | 1893.9440      | 947.4756         | 1892.9600      | 946.9836         | 16 |
| 4  | 458.2245  | 229.6159        | 441.1980       | 221.1026         | 440.2140       | 220.6106         | D    | 1782.8756 | 891.9414        | 1765.8491      | 883.4282         | 1764.8650      | 882.9362         | 15 |
| 5  | 571.3086  | 286.1579        | 554.2821       | 277.6447         | 553.2980       | 277.1527         | L    | 1667.8487 | 834.4280        | 1650.8221      | 825.9147         | 1649.8381      | 825.4227         | 14 |
| 6  | 699.3672  | 350.1872        | 682.3406       | 341.6740         | 681.3566       | 341.1819         | Q    | 1554.7646 | 777.8859        | 1537.7380      | 769.3727         | 1536.7540      | 768.8807         | 13 |
| 7  | 786.3992  | 393.7032        | 769.3727       | 385.1900         | 768.3886       | 384.6980         | S    | 1426.7060 | 713.8566        | 1409.6795      | 705.3434         | 1408.6955      | 704.8514         | 12 |
| 8  | 899.4833  | 450.2453        | 882.4567       | 441.7320         | 881.4727       | 441.2400         | L    | 1339.6740 | 670.3406        | 1322.6474      | 661.8274         | 1321.6634      | 661.3353         | 11 |
| 9  | 1028.5259 | 514.7666        | 1011.4993      | 506.2533         | 1010.5153      | 505.7613         | E    | 1226.5899 | 613.7986        | 1209.5634      | 605.2853         | 1208.5794      | 604.7933         | 10 |
| 10 | 1143.5528 | 572.2800        | 1126.5263      | 563.7668         | 1125.5422      | 563.2748         | D    | 1097.5473 | 549.2773        | 1080.5208      | 540.7640         | 1079.5368      | 540.2720         | 9  |
| 11 | 1256.6369 | 628.8221        | 1239.6103      | 620.3088         | 1238.6263      | 619.8168         | I    | 982.5204  | 491.7638        | 965.4938       | 483.2506         | 964.5098       | 482.7585         | 8  |
| 12 | 1369.7209 | 685.3641        | 1352.6944      | 676.8508         | 1351.7104      | 676.3588         | L    | 869.4363  | 435.2218        | 852.4098       | 426.7085         | 851.4258       | 426.2165         | 7  |
| 13 | 1506.7798 | 753.8936        | 1489.7533      | 745.3803         | 1488.7693      | 744.8883         | H    | 756.3523  | 378.6798        | 739.3257       | 370.1665         | 738.3417       | 369.6745         | 6  |
| 14 | 1635.8224 | 818.4149        | 1618.7959      | 809.9016         | 1617.8119      | 809.4096         | Q    | 619.2933  | 310.1503        | 602.2668       | 301.6370         | 601.2828       | 301.1450         | 5  |
| 15 | 1734.8909 | 867.9491        | 1717.8643      | 859.4358         | 1716.8803      | 858.9438         | V    | 490.2508  | 245.6290        | 473.2242       | 237.1157         | 472.2402       | 236.6237         | 4  |
| 16 | 1863.9335 | 932.4704        | 1846.9069      | 923.9571         | 1845.9229      | 923.4651         | E    | 391.1823  | 196.0948        | 374.1558       | 187.5815         | 373.1718       | 187.0895         | 3  |
| 17 | 1978.9604 | 989.9838        | 1961.9338      | 981.4706         | 1960.9498      | 980.9786         | N    | 262.1397  | 131.5735        | 245.1132       | 123.0602         |                |                  | 2  |
| 18 |           |                 |                |                  |                |                  | K    | 147.1128  | 74.0600         | 130.0863       | 65.5468          |                |                  | 1  |

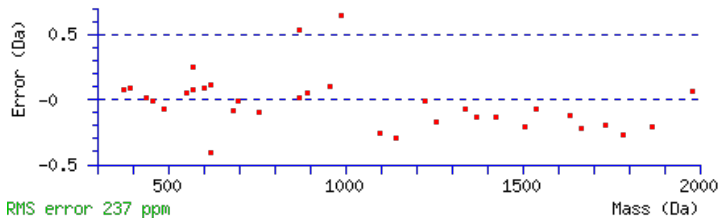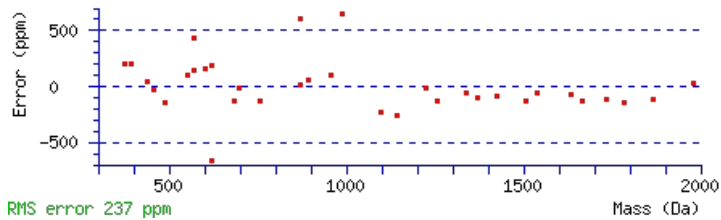

NCBI BLAST search of [VDKDLQSLEDILHQVENK](#)

(Parameters: blastp, nr protein database, expect=20000, no filter, PAM30)

Other BLAST [web gateways](#)

**All matches to this query**

| Score | Mr(calcd) | Delta   | Sequence                             | Site Analysis              |
|-------|-----------|---------|--------------------------------------|----------------------------|
| 88.6  | 2124.0586 | 0.0072  | <a href="#">VDKDLQSLEDILHQVENK</a>   | Deamidated Q14, N17 99.99% |
| 47.0  | 2124.0586 | 0.0072  | <a href="#">VDKDLQSLEDILHQVENK</a>   | Deamidated Q6, N17 0.01%   |
| 46.1  | 2124.0586 | 0.0072  | <a href="#">VDKDLQSLEDILHQVENK</a>   | Deamidated Q6, Q14 0.01%   |
| 11.9  | 2124.0674 | -0.0015 | <a href="#">EHQDINHVGLLLSYDMIK</a>   |                            |
| 9.5   | 2123.0577 | 1.0081  | <a href="#">MQDMLKMAFDALAKIHTK</a>   |                            |
| 8.5   | 2124.0595 | 0.0063  | <a href="#">VQNVEAGKGCVAAYYSMVLK</a> |                            |
| 8.3   | 2124.0640 | 0.0018  | <a href="#">NFFVNRTVQKHFDTLQK</a>    |                            |
| 7.5   | 2124.0640 | 0.0018  | <a href="#">NFFVNRTVQKHFDTLQK</a>    |                            |
| 6.9   | 2124.0640 | 0.0018  | <a href="#">NFFVNRTVQKHFDTLQK</a>    |                            |
| 6.6   | 2124.0586 | 0.0072  | <a href="#">NEVQHLIDELSQLDKDVK</a>   |                            |

Mascot: <http://www.matrixscience.com/>

# MASCOT SCIENCE Mascot Search Results

## Peptide View

MS/MS Fragmentation of **DLQSLEDILHQVENK**

Found in **C9JC84** in **con\_Xuniprot\_HUMAN3**, C9JC84\_HUMAN Fibrinogen gamma chain OS=Homo sapiens GN=FGG PE=2 SV=1

Match to Query 10144: 1780.890508 from(891.452530,2+) intensity(186271.0469) rtinseconds(2400) scans(5992) index(9135)

Title: 111019\_Est\_ISCardio\_NMI\_YS\_G\_4Spectrum5174\_scans\_\_5992

Data file C:\\mascot\\20140703\_Tmgf\_1D\\CSV\_UseAnalysis\\MasterCSV\\All\_Glyco\\mgf\\ptm\\UC18ERLIC\_PTM\_35D.mgf

Click mouse within plot area to zoom in by factor of two about that point

Or, to Da

Label all possible matches Label matches used for scoring

Show Y-axis

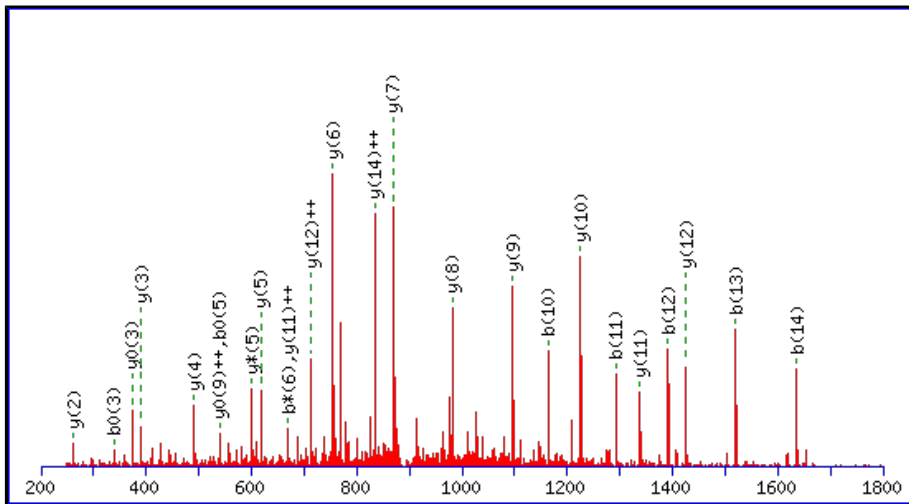

Monoisotopic mass of neutral peptide Mr(calc): 1780.8843

Fixed modifications: Carbamidomethyl (C) (apply to specified residues or termini only)

Variable modifications:

N14 : Deamidated (NQ)

Ions Score: 88 Expect: 3.9e-007

Matches : 25/160 fragment ions using 32 most intense peaks ([help](#))

| #  | b         | b <sup>++</sup> | b <sup>*</sup> | b <sup>*++</sup> | b <sup>0</sup> | b <sup>0++</sup> | Seq. | y         | y <sup>++</sup> | y <sup>*</sup> | y <sup>*++</sup> | y <sup>0</sup> | y <sup>0++</sup> | #  |
|----|-----------|-----------------|----------------|------------------|----------------|------------------|------|-----------|-----------------|----------------|------------------|----------------|------------------|----|
| 1  | 116.0342  | 58.5207         |                |                  | 98.0237        | 49.5155          | D    |           |                 |                |                  |                |                  | 15 |
| 2  | 229.1183  | 115.0628        |                |                  | 211.1077       | 106.0575         | L    | 1666.8646 | 833.9360        | 1649.8381      | 825.4227         | 1648.8541      | 824.9307         | 14 |
| 3  | 357.1769  | 179.0921        | 340.1503       | 170.5788         | 339.1663       | 170.0868         | Q    | 1553.7806 | 777.3939        | 1536.7540      | 768.8807         | 1535.7700      | 768.3886         | 13 |
| 4  | 444.2089  | 222.6081        | 427.1823       | 214.0948         | 426.1983       | 213.6028         | S    | 1425.7220 | 713.3646        | 1408.6955      | 704.8514         | 1407.7114      | 704.3594         | 12 |
| 5  | 557.2930  | 279.1501        | 540.2664       | 270.6368         | 539.2824       | 270.1448         | L    | 1338.6900 | 669.8486        | 1321.6634      | 661.3353         | 1320.6794      | 660.8433         | 11 |
| 6  | 686.3355  | 343.6714        | 669.3090       | 335.1581         | 668.3250       | 334.6661         | E    | 1225.6059 | 613.3066        | 1208.5794      | 604.7933         | 1207.5953      | 604.3013         | 10 |
| 7  | 801.3625  | 401.1849        | 784.3359       | 392.6716         | 783.3519       | 392.1796         | D    | 1096.5633 | 548.7853        | 1079.5368      | 540.2720         | 1078.5527      | 539.7800         | 9  |
| 8  | 914.4466  | 457.7269        | 897.4200       | 449.2136         | 896.4360       | 448.7216         | I    | 981.5364  | 491.2718        | 964.5098       | 482.7585         | 963.5258       | 482.2665         | 8  |
| 9  | 1027.5306 | 514.2689        | 1010.5041      | 505.7557         | 1009.5201      | 505.2637         | L    | 868.4523  | 434.7298        | 851.4258       | 426.2165         | 850.4417       | 425.7245         | 7  |
| 10 | 1164.5895 | 582.7984        | 1147.5630      | 574.2851         | 1146.5790      | 573.7931         | H    | 755.3682  | 378.1878        | 738.3417       | 369.6745         | 737.3577       | 369.1825         | 6  |
| 11 | 1292.6481 | 646.8277        | 1275.6216      | 638.3144         | 1274.6375      | 637.8224         | Q    | 618.3093  | 309.6583        | 601.2828       | 301.1450         | 600.2988       | 300.6530         | 5  |
| 12 | 1391.7165 | 696.3619        | 1374.6900      | 687.8486         | 1373.7060      | 687.3566         | V    | 490.2508  | 245.6290        | 473.2242       | 237.1157         | 472.2402       | 236.6237         | 4  |
| 13 | 1520.7591 | 760.8832        | 1503.7326      | 752.3699         | 1502.7485      | 751.8779         | E    | 391.1823  | 196.0948        | 374.1558       | 187.5815         | 373.1718       | 187.0895         | 3  |
| 14 | 1635.7861 | 818.3967        | 1618.7595      | 809.8834         | 1617.7755      | 809.3914         | N    | 262.1397  | 131.5735        | 245.1132       | 123.0602         |                |                  | 2  |
| 15 |           |                 |                |                  |                |                  | K    | 147.1128  | 74.0600         | 130.0863       | 65.5468          |                |                  | 1  |

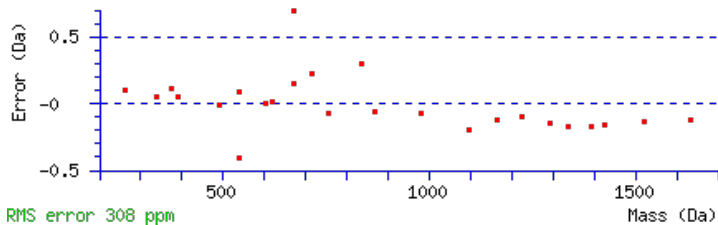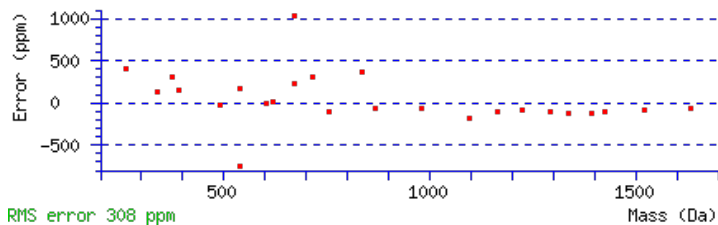

NCBI **BLAST** search of [DLQSLEDILHQVENK](#)

(Parameters: blastp, nr protein database, expect=20000, no filter, PAM30)

Other BLAST [web gateways](#)

**All matches to this query**

| Score | Mr(calc)  | Delta   | Sequence                         | Site Analysis         |
|-------|-----------|---------|----------------------------------|-----------------------|
| 88.1  | 1780.8843 | 0.0062  | <a href="#">DLQSLEDILHQVENK</a>  | Deamidated N14 99.98% |
| 51.1  | 1780.8843 | 0.0062  | <a href="#">DLQSLEDILHQVENK</a>  | Deamidated Q11 0.02%  |
| 21.2  | 1780.8883 | 0.0022  | <a href="#">QLNSIYGEYIPELNK</a>  |                       |
| 21.0  | 1780.8883 | 0.0022  | <a href="#">QLNSIYGEYIPELNK</a>  |                       |
| 8.2   | 1780.8843 | 0.0062  | <a href="#">DLQSLEDILHQVENK</a>  | Deamidated Q3 0.00%   |
| 6.5   | 1779.8825 | 1.0080  | <a href="#">KMLNEKVSNQAFEDK</a>  |                       |
| 6.0   | 1780.8843 | 0.0062  | <a href="#">SLQKLDPHQKDDINK</a>  |                       |
| 5.8   | 1780.8955 | -0.0050 | <a href="#">RESSQPLLQGENPTPK</a> |                       |
| 4.4   | 1780.8843 | 0.0062  | <a href="#">NEVQHLIDELSQLDK</a>  |                       |
| 3.8   | 1780.8843 | 0.0062  | <a href="#">NEVQHLIDELSQLDK</a>  |                       |

Mascot: <http://www.matrixscience.com/>



# MATRIX SCIENCE Mascot Search Results

## Peptide View

MS/MS Fragmentation of **DLQSLEDILHQVENK**

Found in **C9JC84** in **con\_Xuniprot\_HUMAN3**, C9JC84\_HUMAN Fibrinogen gamma chain OS=Homo sapiens GN=FGG PE=2 SV=1

Match to Query 10178: 1781.871928 from(891.943240,2+) intensity(470838.0313) rtinseconds(2380) scans(6316) index(4626)

Title: 111019\_Est\_ISCardio\_NMI\_YP\_G\_7Spectrum5382\_scans\_\_6316

Data file C:\\mascot\\20140703\_Tmgf\_1D\\CSV\_UseAnalysis\\MasterCSV\\All\_Glyco\\mgf\\ptm\\UC18ERLIC\_PTM\_35D.mgf

Click mouse within plot area to zoom in by factor of two about that point

Or, to Da

Label all possible matches Label matches used for scoring

Show Y-axis

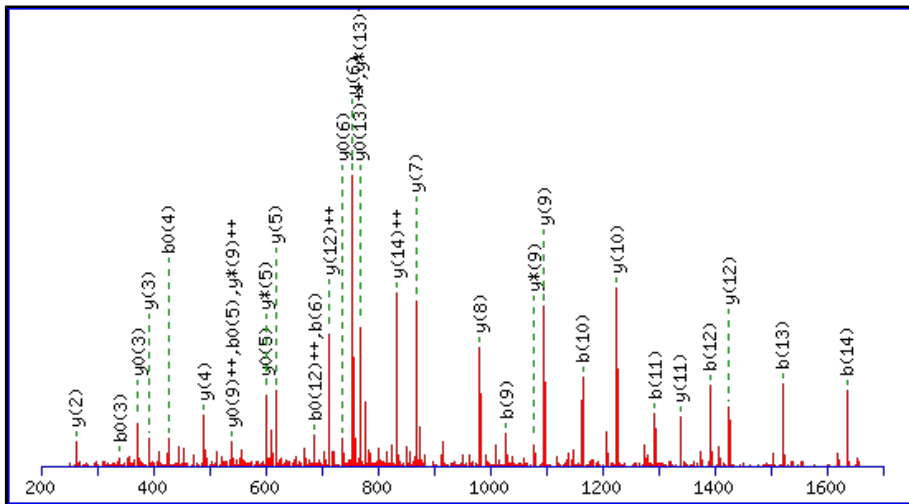

Monoisotopic mass of neutral peptide Mr(calc): 1781.8683

Fixed modifications: Carbamidomethyl (C) (apply to specified residues or termini only)

Variable modifications:

Q3 : Deamidated (NQ)

N14 : Deamidated (NQ)

Ions Score: 75 Expect: 8.6e-006

Matches : 33/160 fragment ions using 45 most intense peaks ([help](#))

| #  | b         | b <sup>++</sup> | b <sup>*</sup> | b <sup>*++</sup> | b <sup>0</sup> | b <sup>0++</sup> | Seq. | y         | y <sup>++</sup> | y <sup>*</sup> | y <sup>*++</sup> | y <sup>0</sup> | y <sup>0++</sup> | #  |
|----|-----------|-----------------|----------------|------------------|----------------|------------------|------|-----------|-----------------|----------------|------------------|----------------|------------------|----|
| 1  | 116.0342  | 58.5207         |                |                  | 98.0237        | 49.5155          | D    |           |                 |                |                  |                |                  | 15 |
| 2  | 229.1183  | 115.0628        |                |                  | 211.1077       | 106.0575         | L    | 1667.8487 | 834.4280        | 1650.8221      | 825.9147         | 1649.8381      | 825.4227         | 14 |
| 3  | 358.1609  | 179.5841        | 341.1343       | 171.0708         | 340.1503       | 170.5788         | Q    | 1554.7646 | 777.8859        | 1537.7380      | 769.3727         | 1536.7540      | 768.8807         | 13 |
| 4  | 445.1929  | 223.1001        | 428.1664       | 214.5868         | 427.1823       | 214.0948         | S    | 1425.7220 | 713.3646        | 1408.6955      | 704.8514         | 1407.7114      | 704.3594         | 12 |
| 5  | 558.2770  | 279.6421        | 541.2504       | 271.1288         | 540.2664       | 270.6368         | L    | 1338.6900 | 669.8486        | 1321.6634      | 661.3353         | 1320.6794      | 660.8433         | 11 |
| 6  | 687.3196  | 344.1634        | 670.2930       | 335.6501         | 669.3090       | 335.1581         | E    | 1225.6059 | 613.3066        | 1208.5794      | 604.7933         | 1207.5953      | 604.3013         | 10 |
| 7  | 802.3465  | 401.6769        | 785.3200       | 393.1636         | 784.3359       | 392.6716         | D    | 1096.5633 | 548.7853        | 1079.5368      | 540.2720         | 1078.5528      | 539.7800         | 9  |
| 8  | 915.4306  | 458.2189        | 898.4040       | 449.7056         | 897.4200       | 449.2136         | I    | 981.5364  | 491.2718        | 964.5098       | 482.7585         | 963.5258       | 482.2665         | 8  |
| 9  | 1028.5146 | 514.7610        | 1011.4881      | 506.2477         | 1010.5041      | 505.7557         | L    | 868.4523  | 434.7298        | 851.4258       | 426.2165         | 850.4417       | 425.7245         | 7  |
| 10 | 1165.5735 | 583.2904        | 1148.5470      | 574.7771         | 1147.5630      | 574.2851         | H    | 755.3682  | 378.1878        | 738.3417       | 369.6745         | 737.3577       | 369.1825         | 6  |
| 11 | 1293.6321 | 647.3197        | 1276.6056      | 638.8064         | 1275.6216      | 638.3144         | Q    | 618.3093  | 309.6583        | 601.2828       | 301.1450         | 600.2988       | 300.6530         | 5  |
| 12 | 1392.7005 | 696.8539        | 1375.6740      | 688.3406         | 1374.6900      | 687.8486         | V    | 490.2508  | 245.6290        | 473.2242       | 237.1157         | 472.2402       | 236.6237         | 4  |
| 13 | 1521.7431 | 761.3752        | 1504.7166      | 752.8619         | 1503.7326      | 752.3699         | E    | 391.1823  | 196.0948        | 374.1558       | 187.5815         | 373.1718       | 187.0895         | 3  |
| 14 | 1636.7701 | 818.8887        | 1619.7435      | 810.3754         | 1618.7595      | 809.8834         | N    | 262.1397  | 131.5735        | 245.1132       | 123.0602         |                |                  | 2  |
| 15 |           |                 |                |                  |                |                  | K    | 147.1128  | 74.0600         | 130.0863       | 65.5468          |                |                  | 1  |

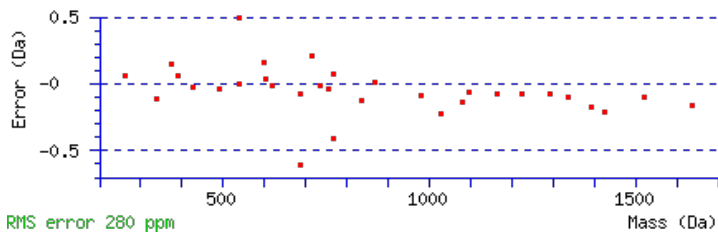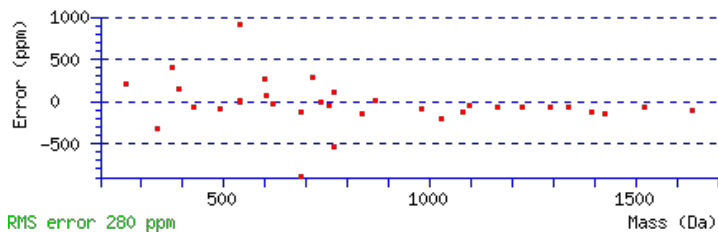

NCBI **BLAST** search of [DLQSLEDILHQVENK](#)

(Parameters: blastp, nr protein database, expect=20000, no filter, PAM30)

Other BLAST [web gateways](#)

**All matches to this query**

| Score | Mr(calc)  | Delta   | Sequence                         | Site Analysis             |
|-------|-----------|---------|----------------------------------|---------------------------|
| 74.6  | 1781.8683 | 0.0036  | <a href="#">DLQSLEDILHQVENK</a>  | Deamidated Q3, N14 98.78% |
| 53.9  | 1781.8683 | 0.0036  | <a href="#">DLQSLEDILHQVENK</a>  | Deamidated Q11, N14 0.84% |
| 50.5  | 1781.8683 | 0.0036  | <a href="#">DLQSLEDILHQVENK</a>  | Deamidated Q3, Q11 0.38%  |
| 23.2  | 1780.8665 | 1.0054  | <a href="#">KMLNEKVSNOAFEDK</a>  |                           |
| 18.7  | 1781.8723 | -0.0004 | <a href="#">QLNSIYGEYIPELNK</a>  |                           |
| 14.7  | 1781.8723 | -0.0004 | <a href="#">QLNSIYGEYIPELNK</a>  |                           |
| 14.1  | 1781.8631 | 0.0088  | <a href="#">KVTCEHVRSTWHNK</a>   |                           |
| 9.7   | 1781.8723 | -0.0004 | <a href="#">QLNSIYGEYIPELNK</a>  |                           |
| 9.6   | 1780.8665 | 1.0054  | <a href="#">KMLNEKVSNOAFEDK</a>  |                           |
| 8.7   | 1781.8795 | -0.0076 | <a href="#">LQNPSESSEPIPLESR</a> |                           |

Mascot: <http://www.matrixscience.com/>

# MATRIX SCIENCE Mascot Search Results

## Peptide View

MS/MS Fragmentation of **DLQSLEDILHQVENKTSEVK**

Found in **C9JC84** in **con\_Xuniprot\_HUMAN3**, C9JC84\_HUMAN Fibrinogen gamma chain OS=Homo sapiens GN=FGG PE=2 SV=1

Match to Query 15467: 2325.180068 from(1163.597310,2+) intensity(45979.9414) rtinseconds(2389) scans(6199) index(14751)

Title: 111019\_Est\_ML\_YP\_G\_03Spectrum5407\_scans\_6199

Data file C:\mascot\20140703\_Tmgf\_1D\CSV\_UseAnalysis\MasterCSV\All\_Glyco\mgf\ptm\UC18ERLIC\_PTM\_35D.mgf

Click mouse within plot area to zoom in by factor of two about that point

Or, to Da

Label all possible matches Label matches used for scoring

Show Y-axis

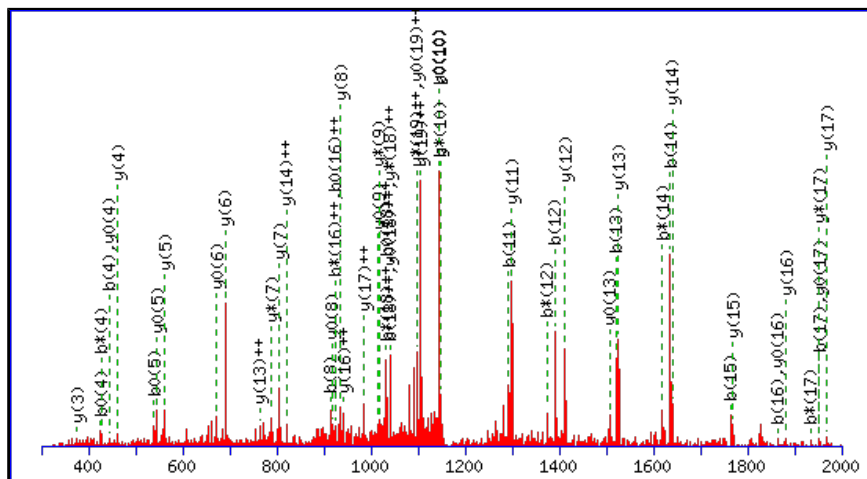

Monoisotopic mass of neutral peptide Mr(calc): 2325.1700

Fixed modifications: Carbamidomethyl (C) (apply to specified residues or termini only)

Variable modifications:

N14 : Deamidated (NQ)

Ions Score: 74 Expect: 9.2e-006

Matches : 57/220 fragment ions using 85 most intense peaks ([help](#))

| #  | b         | b <sup>++</sup> | b <sup>*</sup> | b <sup>*++</sup> | b <sup>0</sup> | b <sup>0++</sup> | Seq. | y         | y <sup>++</sup> | y <sup>*</sup> | y <sup>*++</sup> | y <sup>0</sup> | y <sup>0++</sup> | #  |
|----|-----------|-----------------|----------------|------------------|----------------|------------------|------|-----------|-----------------|----------------|------------------|----------------|------------------|----|
| 1  | 116.0342  | 58.5207         |                |                  | 98.0237        | 49.5155          | D    |           |                 |                |                  |                |                  | 20 |
| 2  | 229.1183  | 115.0628        |                |                  | 211.1077       | 106.0575         | L    | 2211.1503 | 1106.0788       | 2194.1238      | 1097.5655        | 2193.1398      | 1097.0735        | 19 |
| 3  | 357.1769  | 179.0921        | 340.1503       | 170.5788         | 339.1663       | 170.0868         | Q    | 2098.0663 | 1049.5368       | 2081.0397      | 1041.0235        | 2080.0557      | 1040.5315        | 18 |
| 4  | 444.2089  | 222.6081        | 427.1823       | 214.0948         | 426.1983       | 213.6028         | S    | 1970.0077 | 985.5075        | 1952.9811      | 976.9942         | 1951.9971      | 976.5022         | 17 |
| 5  | 557.2930  | 279.1501        | 540.2664       | 270.6368         | 539.2824       | 270.1448         | L    | 1882.9756 | 941.9915        | 1865.9491      | 933.4782         | 1864.9651      | 932.9862         | 16 |
| 6  | 686.3355  | 343.6714        | 669.3090       | 335.1581         | 668.3250       | 334.6661         | E    | 1769.8916 | 885.4494        | 1752.8650      | 876.9362         | 1751.8810      | 876.4441         | 15 |
| 7  | 801.3625  | 401.1849        | 784.3359       | 392.6716         | 783.3519       | 392.1796         | D    | 1640.8490 | 820.9281        | 1623.8224      | 812.4149         | 1622.8384      | 811.9229         | 14 |
| 8  | 914.4466  | 457.7269        | 897.4200       | 449.2136         | 896.4360       | 448.7216         | I    | 1525.8220 | 763.4147        | 1508.7955      | 754.9014         | 1507.8115      | 754.4094         | 13 |
| 9  | 1027.5306 | 514.2689        | 1010.5041      | 505.7557         | 1009.5201      | 505.2637         | L    | 1412.7380 | 706.8726        | 1395.7114      | 698.3594         | 1394.7274      | 697.8673         | 12 |
| 10 | 1164.5895 | 582.7984        | 1147.5630      | 574.2851         | 1146.5790      | 573.7931         | H    | 1299.6539 | 650.3306        | 1282.6274      | 641.8173         | 1281.6434      | 641.3253         | 11 |
| 11 | 1292.6481 | 646.8277        | 1275.6216      | 638.3144         | 1274.6375      | 637.8224         | Q    | 1162.5950 | 581.8011        | 1145.5685      | 573.2879         | 1144.5844      | 572.7959         | 10 |
| 12 | 1391.7165 | 696.3619        | 1374.6900      | 687.8486         | 1373.7060      | 687.3566         | V    | 1034.5364 | 517.7719        | 1017.5099      | 509.2586         | 1016.5259      | 508.7666         | 9  |
| 13 | 1520.7591 | 760.8832        | 1503.7326      | 752.3699         | 1502.7485      | 751.8779         | E    | 935.4680  | 468.2376        | 918.4415       | 459.7244         | 917.4575       | 459.2324         | 8  |
| 14 | 1635.7861 | 818.3967        | 1618.7595      | 809.8834         | 1617.7755      | 809.3914         | N    | 806.4254  | 403.7164        | 789.3989       | 395.2031         | 788.4149       | 394.7111         | 7  |
| 15 | 1763.8810 | 882.4441        | 1746.8545      | 873.9309         | 1745.8705      | 873.4389         | K    | 691.3985  | 346.2029        | 674.3719       | 337.6896         | 673.3879       | 337.1976         | 6  |
| 16 | 1864.9287 | 932.9680        | 1847.9021      | 924.4547         | 1846.9181      | 923.9627         | T    | 563.3035  | 282.1554        | 546.2770       | 273.6421         | 545.2930       | 273.1501         | 5  |
| 17 | 1951.9607 | 976.4840        | 1934.9342      | 967.9707         | 1933.9502      | 967.4787         | S    | 462.2558  | 231.6316        | 445.2293       | 223.1183         | 444.2453       | 222.6263         | 4  |
| 18 | 2081.0033 | 1041.0053       | 2063.9768      | 1032.4920        | 2062.9928      | 1032.0000        | E    | 375.2238  | 188.1155        | 358.1973       | 179.6023         | 357.2132       | 179.1103         | 3  |
| 19 | 2180.0717 | 1090.5395       | 2163.0452      | 1082.0262        | 2162.0612      | 1081.5342        | V    | 246.1812  | 123.5942        | 229.1547       | 115.0810         |                |                  | 2  |
| 20 |           |                 |                |                  |                |                  | K    | 147.1128  | 74.0600         | 130.0863       | 65.5468          |                |                  | 1  |

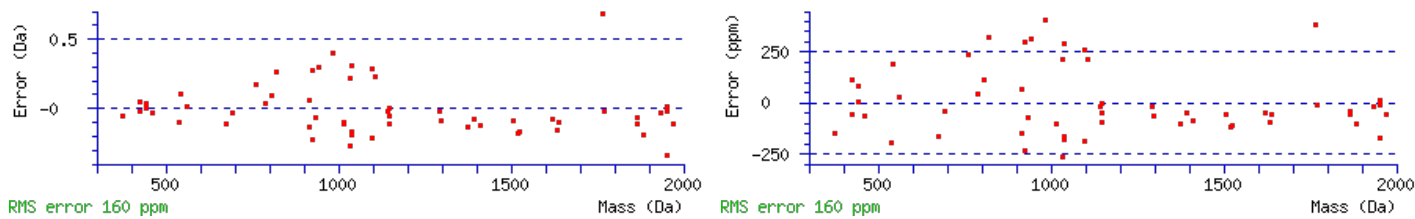

NCBI BLAST search of [DLQSLEDILHQVENKTSEVK](#)

(Parameters: blastp, nr protein database, expect=20000, no filter, PAM30)

Other BLAST [web gateways](#)

**All matches to this query**

| Score | Mr(calc)  | Delta   | Sequence                             | Site Analysis         |
|-------|-----------|---------|--------------------------------------|-----------------------|
| 74.2  | 2325.1700 | 0.0101  | <a href="#">DLQSLEDILHQVENKTSEVK</a> | Deamidated N14 97.90% |
| 57.5  | 2325.1700 | 0.0101  | <a href="#">DLQSLEDILHQVENKTSEVK</a> | Deamidated Q11 2.09%  |
| 33.8  | 2325.1700 | 0.0101  | <a href="#">DLQSLEDILHQVENKTSEVK</a> | Deamidated Q3 0.01%   |
| 20.9  | 2324.1859 | 0.9941  | <a href="#">DLQSLEDILHQVENKTSEVK</a> |                       |
| 11.1  | 2323.1691 | 2.0110  | <a href="#">EIMAEDDQVFLMKLQSLAK</a>  |                       |
| 2.3   | 2324.1769 | 1.0031  | <a href="#">KLRGTMLLTGMTQGVNFGHR</a> |                       |
| 1.9   | 2325.1827 | -0.0027 | <a href="#">DEPRSTNLFMKLDSVFIWK</a>  |                       |

Mascot: <http://www.matrixscience.com/>

# MATRIX SCIENCE Mascot Search Results

## Peptide View

MS/MS Fragmentation of **DLQSLEDILHQVENK**

Found in **C9JC84** in **con\_Xuniprot\_HUMAN3**, C9JC84\_HUMAN Fibrinogen gamma chain OS=Homo sapiens GN=FGG PE=2 SV=1

Match to Query 10182: 1781.874248 from(891.944400,2+) intensity(57212.0352) rtinseconds(2378) scans(6208) index(1545)

Title: 111019\_Est\_ISCardio\_NMI\_YP\_G\_3Spectrum5441\_scans\_6208

Data file C:\\mascot\\20140703\_Tmgf\_1D\\CSV\_UseAnalysis\\MasterCSV\\All\_Glyco\\mgf\\ptm\\UC18ERLIC\_PTM\_35D.mgf

Click mouse within plot area to zoom in by factor of two about that point

Or, to Da

Label all possible matches Label matches used for scoring

Show Y-axis

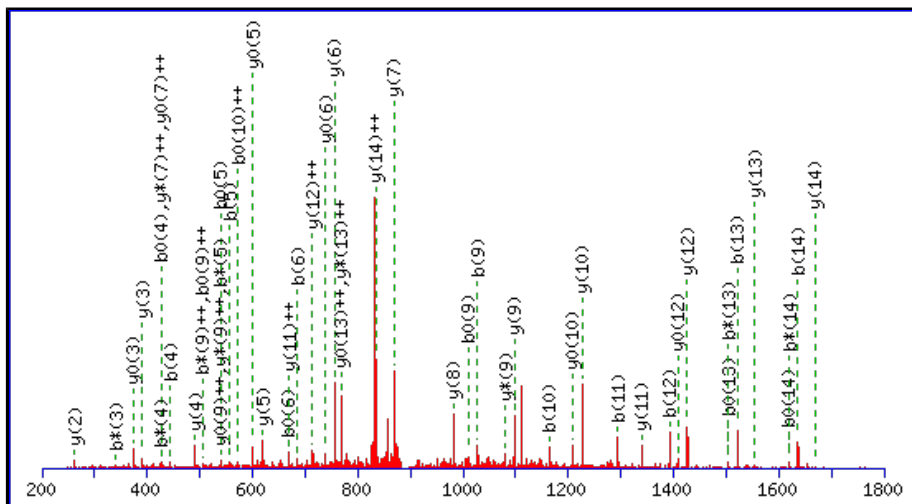

Monoisotopic mass of neutral peptide Mr(calc): 1781.8683

Fixed modifications: Carbamidomethyl (C) (apply to specified residues or termini only)

Variable modifications:

Q11 : Deamidated (NQ)

N14 : Deamidated (NQ)

Ions Score: 73 Expect: 1.4e-005

Matches : 51/160 fragment ions using 92 most intense peaks ([help](#))

| #  | b                | b <sup>++</sup> | b*               | b <sup>+++</sup> | b <sup>0</sup>   | b <sup>0++</sup> | Seq.     | y                | y <sup>++</sup> | y*               | y <sup>+++</sup> | y <sup>0</sup>   | y <sup>0++</sup> | #         |
|----|------------------|-----------------|------------------|------------------|------------------|------------------|----------|------------------|-----------------|------------------|------------------|------------------|------------------|-----------|
| 1  | 116.0342         | 58.5207         |                  |                  | 98.0237          | 49.5155          | <b>D</b> |                  |                 |                  |                  |                  |                  | <b>15</b> |
| 2  | 229.1183         | 115.0628        |                  |                  | 211.1077         | 106.0575         | <b>L</b> | <b>1667.8487</b> | <b>834.4280</b> | 1650.8221        | 825.9147         | 1649.8381        | 825.4227         | <b>14</b> |
| 3  | 357.1769         | 179.0921        | <b>340.1503</b>  | 170.5788         | 339.1663         | 170.0868         | <b>Q</b> | <b>1554.7646</b> | 777.8859        | 1537.7380        | <b>769.3727</b>  | 1536.7540        | <b>768.8807</b>  | <b>13</b> |
| 4  | <b>444.2089</b>  | 222.6081        | <b>427.1823</b>  | 214.0948         | <b>426.1983</b>  | 213.6028         | <b>S</b> | <b>1426.7060</b> | <b>713.8566</b> | 1409.6795        | 705.3434         | <b>1408.6955</b> | 704.8514         | <b>12</b> |
| 5  | <b>557.2930</b>  | 279.1501        | <b>540.2664</b>  | 270.6368         | <b>539.2824</b>  | 270.1448         | <b>L</b> | <b>1339.6740</b> | <b>670.3406</b> | 1322.6474        | 661.8274         | 1321.6634        | 661.3353         | <b>11</b> |
| 6  | <b>686.3355</b>  | 343.6714        | 669.3090         | 335.1581         | <b>668.3250</b>  | 334.6661         | <b>E</b> | <b>1226.5899</b> | 613.7986        | 1209.5634        | 605.2853         | <b>1208.5794</b> | 604.7933         | <b>10</b> |
| 7  | 801.3625         | 401.1849        | 784.3359         | 392.6716         | 783.3519         | 392.1796         | <b>D</b> | <b>1097.5473</b> | 549.2773        | <b>1080.5208</b> | <b>540.7640</b>  | 1079.5368        | <b>540.2720</b>  | <b>9</b>  |
| 8  | 914.4466         | 457.7269        | 897.4200         | 449.2136         | 896.4360         | 448.7216         | <b>I</b> | <b>982.5204</b>  | 491.7638        | 965.4938         | 483.2506         | 964.5098         | 482.7585         | <b>8</b>  |
| 9  | <b>1027.5306</b> | 514.2689        | 1010.5041        | <b>505.7557</b>  | <b>1009.5201</b> | <b>505.2637</b>  | <b>L</b> | <b>869.4363</b>  | 435.2218        | 852.4098         | <b>426.7085</b>  | 851.4258         | <b>426.2165</b>  | <b>7</b>  |
| 10 | <b>1164.5895</b> | 582.7984        | 1147.5630        | 574.2851         | 1146.5790        | <b>573.7931</b>  | <b>H</b> | <b>756.3523</b>  | 378.6798        | 739.3257         | 370.1665         | <b>738.3417</b>  | 369.6745         | <b>6</b>  |
| 11 | <b>1293.6321</b> | 647.3197        | 1276.6056        | 638.8064         | 1275.6216        | 638.3144         | <b>Q</b> | <b>619.2933</b>  | 310.1503        | 602.2668         | 301.6370         | <b>601.2828</b>  | 301.1450         | <b>5</b>  |
| 12 | <b>1392.7005</b> | 696.8539        | 1375.6740        | 688.3406         | 1374.6900        | 687.8486         | <b>V</b> | <b>490.2508</b>  | 245.6290        | 473.2242         | 237.1157         | 472.2402         | 236.6237         | <b>4</b>  |
| 13 | <b>1521.7431</b> | 761.3752        | <b>1504.7166</b> | 752.8619         | <b>1503.7326</b> | 752.3699         | <b>E</b> | <b>391.1823</b>  | 196.0948        | 374.1558         | 187.5815         | <b>373.1718</b>  | 187.0895         | <b>3</b>  |
| 14 | <b>1636.7701</b> | 818.8887        | <b>1619.7435</b> | 810.3754         | <b>1618.7595</b> | 809.8834         | <b>N</b> | <b>262.1397</b>  | 131.5735        | 245.1132         | 123.0602         |                  |                  | <b>2</b>  |
| 15 |                  |                 |                  |                  |                  |                  | <b>K</b> | 147.1128         | 74.0600         | 130.0863         | 65.5468          |                  |                  | <b>1</b>  |

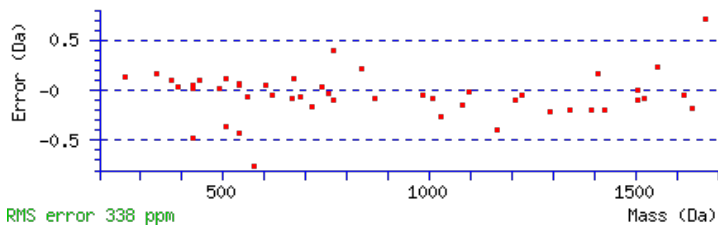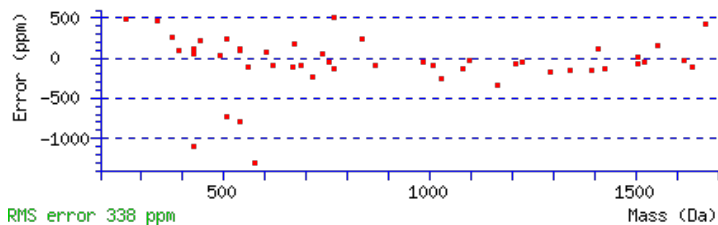

NCBI **BLAST** search of [DLQSLEDILHQVENK](#)

(Parameters: blastp, nr protein database, expect=20000, no filter, PAM30)

Other BLAST [web gateways](#)

**All matches to this query**

| Score | Mr(calc)  | Delta   | Sequence                         | Site Analysis               |
|-------|-----------|---------|----------------------------------|-----------------------------|
| 72.6  | 1781.8683 | 0.0060  | <a href="#">DLQSLEDILHQVENK</a>  | Deamidated Q11, N14 100.00% |
| 24.9  | 1781.8683 | 0.0060  | <a href="#">DLQSLEDILHQVENK</a>  | Deamidated Q3, N14 0.00%    |
| 19.2  | 1781.8723 | 0.0020  | <a href="#">QLNSIYGEYIPELNK</a>  |                             |
| 18.2  | 1781.8683 | 0.0060  | <a href="#">DLQSLEDILHQVENK</a>  | Deamidated Q3, Q11 0.00%    |
| 17.2  | 1781.8723 | 0.0020  | <a href="#">QLNSIYGEYIPELNK</a>  |                             |
| 11.0  | 1781.8795 | -0.0053 | <a href="#">LQNPSESSEPIPLESR</a> |                             |
| 6.4   | 1781.8804 | -0.0062 | <a href="#">QLAMIQNSSGMALFVR</a> |                             |
| 5.6   | 1781.8804 | -0.0062 | <a href="#">MMPLHGTLTKEHNEK</a>  |                             |
| 5.4   | 1781.8723 | 0.0020  | <a href="#">QLNSIYGEYIPELNK</a>  |                             |
| 4.9   | 1780.8665 | 1.0077  | <a href="#">KMLNEKVSNQAFEDK</a>  |                             |

Mascot: <http://www.matrixscience.com/>

# MASCOT SCIENCE Mascot Search Results

## Peptide View

MS/MS Fragmentation of **VDKDLQSLLEDILHQVENKTSEVK**

Found in **C9JC84** in **con\_Xuniprot\_HUMAN3**, C9JC84\_HUMAN Fibrinogen gamma chain OS=Homo sapiens GN=FGG PE=2 SV=1

Match to Query 22428: 2667.365456 from(667.848640,4+) intensity(61773.1328) rtinseconds(2282) scans(5747) index(14198)

Title: 111019\_Est\_ML\_YP\_G\_02Spectrum5019\_scans\_5747

Data file C:\mascot\20140703\_Tmgf\_1D\CSV\_UseAnalysis\MasterCSV\All\_Glyco\mgf\ptm\UC18ERLIC\_PTM\_35D.mgf

Click mouse within plot area to zoom in by factor of two about that point

Or,  to  Da

Label all possible matches  Label matches used for scoring

Show Y-axis

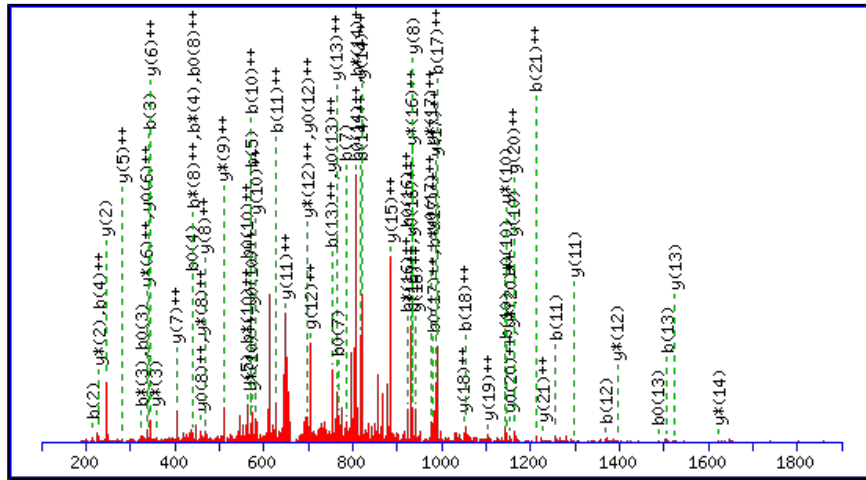

Monoisotopic mass of neutral peptide Mr(calc): 2667.3603

Fixed modifications: Carbamidomethyl (C) (apply to specified residues or termini only)

Variable modifications:

N17 : Deamidated (NQ)

Ions Score: 66 Expect: 6.1e-005

Matches : 77/254 fragment ions using 148 most intense peaks ([help](#))

| #  | b                | b <sup>++</sup>  | b <sup>*</sup>  | b <sup>*++</sup> | b <sup>0</sup>   | b <sup>0++</sup> | Seq. | y                | y <sup>++</sup>  | y <sup>*</sup>   | y <sup>*++</sup> | y <sup>0</sup>   | y <sup>0++</sup> | #  |
|----|------------------|------------------|-----------------|------------------|------------------|------------------|------|------------------|------------------|------------------|------------------|------------------|------------------|----|
| 1  | 100.0757         | 50.5415          |                 |                  |                  |                  | V    |                  |                  |                  |                  |                  |                  | 23 |
| 2  | <b>215.1026</b>  | 108.0550         |                 |                  | 197.0921         | 99.0497          | D    | 2569.2992        | 1285.1532        | 2552.2726        | 1276.6399        | 2551.2886        | 1276.1479        | 22 |
| 3  | <b>343.1976</b>  | 172.1024         | <b>326.1710</b> | 163.5892         | <b>325.1870</b>  | 163.0972         | K    | 2454.2722        | <b>1227.6398</b> | 2437.2457        | 1219.1265        | 2436.2617        | 1218.6345        | 21 |
| 4  | 458.2245         | <b>229.6159</b>  | <b>441.1980</b> | 221.1026         | <b>440.2140</b>  | 220.6106         | D    | 2326.1773        | <b>1163.5923</b> | 2309.1507        | <b>1155.0790</b> | 2308.1667        | <b>1154.5870</b> | 20 |
| 5  | <b>571.3086</b>  | 286.1579         | 554.2821        | 277.6447         | 553.2980         | 277.1527         | L    | 2211.1503        | <b>1106.0788</b> | 2194.1238        | 1097.5655        | 2193.1398        | 1097.0735        | 19 |
| 6  | 699.3672         | 350.1872         | 682.3406        | 341.6740         | 681.3566         | 341.1819         | Q    | 2098.0663        | <b>1049.5368</b> | 2081.0397        | 1041.0235        | 2080.0557        | 1040.5315        | 18 |
| 7  | <b>786.3992</b>  | 393.7032         | 769.3727        | 385.1900         | <b>768.3886</b>  | 384.6980         | S    | 1970.0077        | <b>985.5075</b>  | 1952.9811        | <b>976.9942</b>  | 1951.9971        | <b>976.5022</b>  | 17 |
| 8  | 899.4833         | 450.2453         | 882.4567        | <b>441.7320</b>  | 881.4727         | <b>441.2400</b>  | L    | 1882.9756        | <b>941.9915</b>  | 1865.9491        | <b>933.4782</b>  | 1864.9651        | <b>932.9862</b>  | 16 |
| 9  | 1028.5259        | 514.7666         | 1011.4993       | 506.2533         | 1010.5153        | 505.7613         | E    | 1769.8916        | <b>885.4494</b>  | 1752.8650        | 876.9362         | 1751.8810        | 876.4441         | 15 |
| 10 | <b>1143.5528</b> | <b>572.2800</b>  | 1126.5263       | <b>563.7668</b>  | 1125.5422        | <b>563.2748</b>  | D    | 1640.8490        | <b>820.9281</b>  | <b>1623.8224</b> | 812.4149         | 1622.8384        | 811.9229         | 14 |
| 11 | <b>1256.6369</b> | <b>628.8221</b>  | 1239.6103       | 620.3088         | 1238.6263        | 619.8168         | I    | <b>1525.8220</b> | <b>763.4147</b>  | 1508.7955        | 754.9014         | 1507.8115        | <b>754.4094</b>  | 13 |
| 12 | <b>1369.7209</b> | 685.3641         | 1352.6944       | 676.8508         | 1351.7104        | 676.3588         | L    | 1412.7380        | <b>706.8726</b>  | <b>1395.7114</b> | <b>698.3594</b>  | 1394.7274        | <b>697.8673</b>  | 12 |
| 13 | <b>1506.7798</b> | <b>753.8936</b>  | 1489.7533       | 745.3803         | <b>1488.7693</b> | 744.8883         | H    | <b>1299.6539</b> | <b>650.3306</b>  | 1282.6274        | 641.8173         | 1281.6434        | 641.3253         | 11 |
| 14 | 1634.8384        | <b>817.9229</b>  | 1617.8119       | <b>809.4096</b>  | 1616.8279        | <b>808.9176</b>  | Q    | <b>1162.5950</b> | <b>581.8011</b>  | <b>1145.5685</b> | <b>573.2879</b>  | <b>1144.5844</b> | <b>572.7959</b>  | 10 |
| 15 | 1733.9068        | 867.4571         | 1716.8803       | 858.9438         | 1715.8963        | 858.4518         | V    | 1034.5364        | 517.7719         | 1017.5099        | <b>509.2586</b>  | 1016.5259        | 508.7666         | 9  |
| 16 | 1862.9494        | <b>931.9784</b>  | 1845.9229       | <b>923.4651</b>  | 1844.9389        | <b>922.9731</b>  | E    | <b>935.4680</b>  | <b>468.2376</b>  | 918.4415         | <b>459.7244</b>  | 917.4575         | <b>459.2324</b>  | 8  |
| 17 | 1977.9764        | <b>989.4918</b>  | 1960.9498       | <b>980.9786</b>  | 1959.9658        | <b>980.4865</b>  | N    | 806.4254         | <b>403.7164</b>  | 789.3989         | 395.2031         | 788.4149         | 394.7111         | 7  |
| 18 | 2106.0713        | <b>1053.5393</b> | 2089.0448       | 1045.0260        | 2088.0608        | 1044.5340        | K    | 691.3985         | <b>346.2029</b>  | 674.3719         | <b>337.6896</b>  | 673.3879         | <b>337.1976</b>  | 6  |
| 19 | 2207.1190        | 1104.0631        | 2190.0925       | 1095.5499        | 2189.1085        | 1095.0579        | T    | <b>563.3035</b>  | <b>282.1554</b>  | 546.2770         | 273.6421         | 545.2930         | 273.1501         | 5  |
| 20 | 2294.1510        | 1147.5792        | 2277.1245       | 1139.0659        | 2276.1405        | 1138.5739        | S    | 462.2558         | 231.6316         | 445.2293         | 223.1183         | 444.2453         | 222.6263         | 4  |
| 21 | 2423.1936        | <b>1212.1005</b> | 2406.1671       | 1203.5872        | 2405.1831        | 1203.0952        | E    | 375.2238         | 188.1155         | <b>358.1973</b>  | 179.6023         | 357.2132         | 179.1103         | 3  |
| 22 | 2522.2621        | 1261.6347        | 2505.2355       | 1253.1214        | 2504.2515        | 1252.6294        | V    | <b>246.1812</b>  | 123.5942         | <b>229.1547</b>  | 115.0810         |                  |                  | 2  |
| 23 |                  |                  |                 |                  |                  |                  | K    | 147.1128         | 74.0600          | 130.0863         | 65.5468          |                  |                  | 1  |



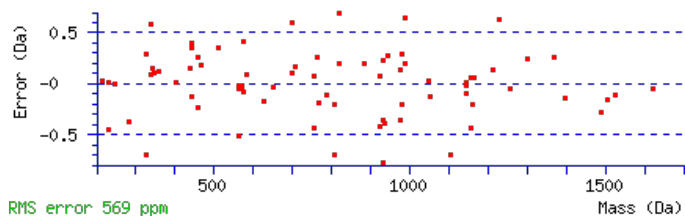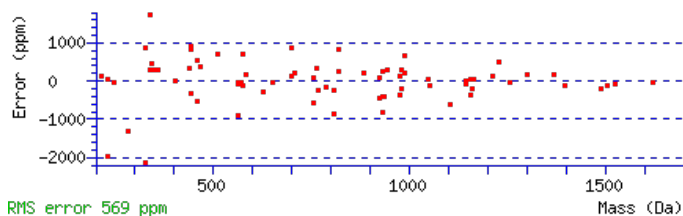

NCBI BLAST search of [VDKDLQSLEDILHQVENKTSEVK](#)  
 (Parameters: blastp, nr protein database, expect=20000, no filter, PAM30)  
 Other BLAST [web gateways](#)

**All matches to this query**

| Score | Mr(calc)  | Delta  | Sequence                                 | Site Analysis         |
|-------|-----------|--------|------------------------------------------|-----------------------|
| 65.8  | 2667.3603 | 0.0052 | <a href="#">VDKDLQSLEDILHQVENKTSEVK</a>  | Deamidated N17 53.29% |
| 64.9  | 2667.3603 | 0.0052 | <a href="#">VDKDLQSLEDILHQVENKTSEVK</a>  | Deamidated Q14 43.82% |
| 53.1  | 2667.3603 | 0.0052 | <a href="#">VDKDLQSLEDILHQVENKTSEVK</a>  | Deamidated Q6 2.89%   |
| 3.7   | 2667.3560 | 0.0095 | <a href="#">VNLLNHNIPKGPCILCGMGNEFKR</a> |                       |
| 3.4   | 2666.3625 | 1.0029 | <a href="#">NPENTGMLFTSSLDLIKVNLDVAR</a> |                       |
| 3.4   | 2666.3625 | 1.0029 | <a href="#">NPENTGMLFTSSLDLIKVNLDVAR</a> |                       |
| 2.9   | 2665.3536 | 2.0119 | <a href="#">MVDFPGYNLSGAVASFLFILLTMK</a> |                       |
| 2.7   | 2665.3633 | 2.0022 | <a href="#">NLVQSMQVLSGVFTDVEASLKDIR</a> |                       |
| 2.7   | 2665.3601 | 2.0054 | <a href="#">CSLDSSLRIMICLLKIPSTNATR</a>  |                       |
| 2.7   | 2666.3625 | 1.0029 | <a href="#">NPENTGMLFTSSLDLIKVNLDVAR</a> |                       |

Mascot: <http://www.matrixscience.com/>

# MATRIX SCIENCE Mascot Search Results

## Peptide View

MS/MS Fragmentation of **DLQSLEDILHQVENKTSEVK**

Found in **C9JC84** in **con\_Xuniprot\_HUMAN3**, C9JC84\_HUMAN Fibrinogen gamma chain OS=Homo sapiens GN=FGG PE=2 SV=1

Match to Query 15471: 2326.156692 from(776.392840,3+) intensity(35456.7773) rtinseconds(2405) scans(6283) index(1554)

Title: 111019\_Est\_ISCardio\_NMI\_YP\_G\_3Spectrum5508\_scans\_\_6283

Data file C:\mascot\20140703\_Tmgf\_1D\CSV\_UseAnalysis\MasterCSV\All\_Glyco\mgf\ptm\UC18ERLIC\_PTM\_35D.mgf

Click mouse within plot area to zoom in by factor of two about that point

Or, to Da

Label all possible matches Label matches used for scoring

Show Y-axis

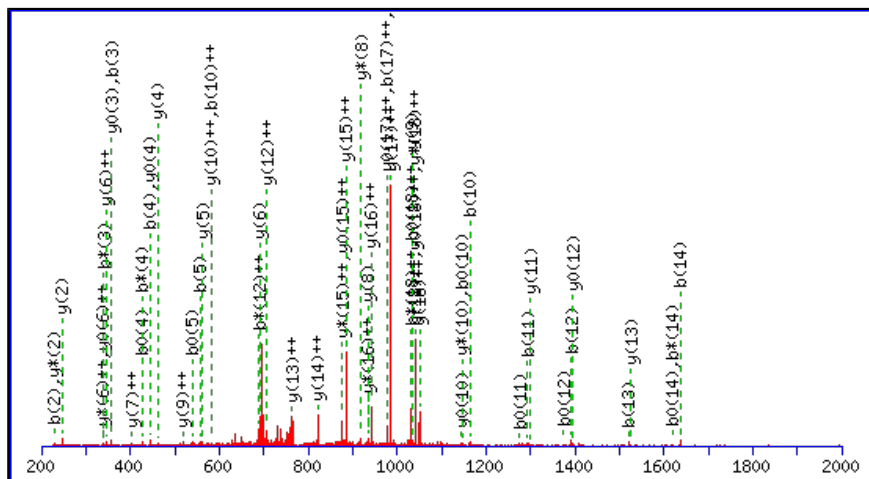

Monoisotopic mass of neutral peptide Mr(calc): 2326.1540

Fixed modifications: Carbamidomethyl (C) (apply to specified residues or termini only)

Variable modifications:

Q11 : Deamidated (NQ)

N14 : Deamidated (NQ)

Ions Score: 52 Expect: 0.0017

Matches : 59/220 fragment ions using 110 most intense peaks ([help](#))

| #  | b                | b <sup>++</sup>  | b <sup>*</sup>   | b <sup>*++</sup> | b <sup>0</sup>   | b <sup>0++</sup> | Seq.     | y                | y <sup>++</sup>  | y <sup>*</sup>   | y <sup>*++</sup> | y <sup>0</sup>   | y <sup>0++</sup> | #         |
|----|------------------|------------------|------------------|------------------|------------------|------------------|----------|------------------|------------------|------------------|------------------|------------------|------------------|-----------|
| 1  | 116.0342         | 58.5207          |                  |                  | 98.0237          | 49.5155          | <b>D</b> |                  |                  |                  |                  |                  |                  | <b>20</b> |
| 2  | <b>229.1183</b>  | 115.0628         |                  |                  | 211.1077         | 106.0575         | <b>L</b> | 2212.1343        | 1106.5708        | 2195.1078        | 1098.0575        | 2194.1238        | 1097.5655        | <b>19</b> |
| 3  | <b>357.1769</b>  | 179.0921         | <b>340.1503</b>  | 170.5788         | 339.1663         | 170.0868         | <b>Q</b> | 2099.0503        | <b>1050.0288</b> | 2082.0237        | <b>1041.5155</b> | 2081.0397        | <b>1041.0235</b> | <b>18</b> |
| 4  | <b>444.2089</b>  | 222.6081         | <b>427.1823</b>  | 214.0948         | <b>426.1983</b>  | 213.6028         | <b>S</b> | 1970.9917        | <b>985.9995</b>  | 1953.9651        | <b>977.4862</b>  | 1952.9811        | <b>976.9942</b>  | <b>17</b> |
| 5  | <b>557.2930</b>  | 279.1501         | 540.2664         | 270.6368         | <b>539.2824</b>  | 270.1448         | <b>L</b> | 1883.9597        | <b>942.4835</b>  | 1866.9331        | <b>933.9702</b>  | 1865.9491        | 933.4782         | <b>16</b> |
| 6  | 686.3355         | 343.6714         | 669.3090         | 335.1581         | 668.3250         | 334.6661         | <b>E</b> | 1770.8756        | <b>885.9414</b>  | 1753.8491        | <b>877.4282</b>  | 1752.8650        | <b>876.9362</b>  | <b>15</b> |
| 7  | 801.3625         | 401.1849         | 784.3359         | 392.6716         | 783.3519         | 392.1796         | <b>D</b> | 1641.8330        | <b>821.4201</b>  | 1624.8065        | 812.9069         | 1623.8224        | 812.4149         | <b>14</b> |
| 8  | 914.4466         | 457.7269         | 897.4200         | 449.2136         | 896.4360         | 448.7216         | <b>I</b> | <b>1526.8061</b> | <b>763.9067</b>  | 1509.7795        | 755.3934         | 1508.7955        | 754.9014         | <b>13</b> |
| 9  | 1027.5306        | 514.2689         | 1010.5041        | 505.7557         | 1009.5201        | 505.2637         | <b>L</b> | 1413.7220        | <b>707.3646</b>  | 1396.6955        | 698.8514         | <b>1395.7114</b> | 698.3594         | <b>12</b> |
| 10 | <b>1164.5895</b> | <b>582.7984</b>  | 1147.5630        | 574.2851         | <b>1146.5790</b> | 573.7931         | <b>H</b> | <b>1300.6379</b> | 650.8226         | 1283.6114        | 642.3093         | 1282.6274        | 641.8173         | <b>11</b> |
| 11 | <b>1293.6321</b> | 647.3197         | 1276.6056        | 638.8064         | <b>1275.6216</b> | 638.3144         | <b>Q</b> | 1163.5790        | <b>582.2932</b>  | <b>1146.5525</b> | 573.7799         | <b>1145.5685</b> | 573.2879         | <b>10</b> |
| 12 | <b>1392.7005</b> | 696.8539         | 1375.6740        | <b>688.3406</b>  | <b>1374.6900</b> | 687.8486         | <b>V</b> | <b>1034.5364</b> | <b>517.7719</b>  | 1017.5099        | 509.2586         | 1016.5259        | 508.7666         | <b>9</b>  |
| 13 | <b>1521.7431</b> | 761.3752         | 1504.7166        | 752.8619         | 1503.7326        | 752.3699         | <b>E</b> | <b>935.4680</b>  | 468.2376         | <b>918.4415</b>  | 459.7244         | 917.4575         | 459.2324         | <b>8</b>  |
| 14 | <b>1636.7701</b> | 818.8887         | <b>1619.7435</b> | 810.3754         | <b>1618.7595</b> | 809.8834         | <b>N</b> | 806.4254         | <b>403.7164</b>  | 789.3989         | 395.2031         | 788.4149         | 394.7111         | <b>7</b>  |
| 15 | 1764.8650        | 882.9362         | 1747.8385        | 874.4229         | 1746.8545        | 873.9309         | <b>K</b> | <b>691.3985</b>  | <b>346.2029</b>  | 674.3719         | <b>337.6896</b>  | 673.3879         | <b>337.1976</b>  | <b>6</b>  |
| 16 | 1865.9127        | 933.4600         | 1848.8862        | 924.9467         | 1847.9022        | 924.4547         | <b>T</b> | <b>563.3035</b>  | 282.1554         | 546.2770         | 273.6421         | 545.2930         | 273.1501         | <b>5</b>  |
| 17 | 1952.9447        | <b>976.9760</b>  | 1935.9182        | 968.4627         | 1934.9342        | 967.9707         | <b>S</b> | <b>462.2558</b>  | 231.6316         | 445.2293         | 223.1183         | <b>444.2453</b>  | 222.6263         | <b>4</b>  |
| 18 | 2081.9873        | <b>1041.4973</b> | 2064.9608        | <b>1032.9840</b> | 2063.9768        | <b>1032.4920</b> | <b>E</b> | 375.2238         | 188.1155         | 358.1973         | 179.6023         | <b>357.2132</b>  | 179.1103         | <b>3</b>  |
| 19 | 2181.0558        | 1091.0315        | 2164.0292        | 1082.5182        | 2163.0452        | 1082.0262        | <b>V</b> | <b>246.1812</b>  | 123.5942         | <b>229.1547</b>  | 115.0810         |                  |                  | <b>2</b>  |
| 20 |                  |                  |                  |                  |                  |                  | <b>K</b> | 147.1128         | 74.0600          | 130.0863         | 65.5468          |                  |                  | <b>1</b>  |

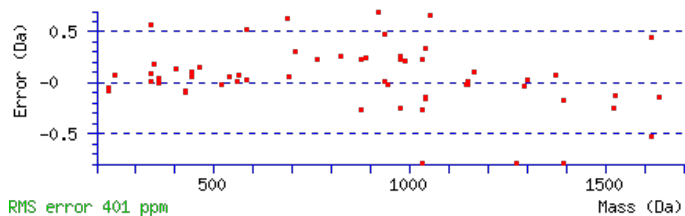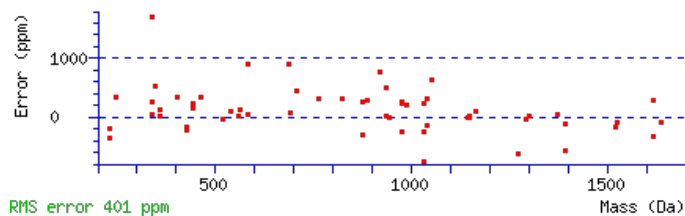

NCBI BLAST search of [DLQSLEDILHQVENKTSEVK](#)

(Parameters: blastp, nr protein database, expect=20000, no filter, PAM30)

Other BLAST [web gateways](#)

**All matches to this query**

| Score | Mr(calc)  | Delta   | Sequence                                 | Site Analysis              |
|-------|-----------|---------|------------------------------------------|----------------------------|
| 51.8  | 2326.1540 | 0.0027  | <a href="#">DLQSLEDILHQVENKTSEVK</a>     | Deamidated Q11, N14 98.80% |
| 30.6  | 2326.1540 | 0.0027  | <a href="#">DLQSLEDILHQVENKTSEVK</a>     | Deamidated Q3, N14 0.75%   |
| 28.4  | 2326.1540 | 0.0027  | <a href="#">DLQSLEDILHQVENKTSEVK</a>     | Deamidated Q3, Q11 0.45%   |
| 10.1  | 2326.1627 | -0.0060 | <a href="#">AYVFNLSCLGSQVERLLEAR</a>     |                            |
| 7.4   | 2326.1627 | -0.0060 | <a href="#">DNTLMFEARFESGNLQKVVK</a>     |                            |
| 6.4   | 2325.1457 | 1.0110  | <a href="#">NEQKAKMEALLGSGMVQVGYR</a>    |                            |
| 6.4   | 2325.1457 | 1.0110  | <a href="#">NEQKAKMEALLGSGMVQVGYR</a>    |                            |
| 6.1   | 2326.1614 | -0.0047 | <a href="#">QPPPHHGANNVVCDLRGFRR</a>     |                            |
| 5.9   | 2325.1570 | 0.9997  | <a href="#">TNCMLGEQVVDAGRPVPVK</a>      |                            |
| 5.7   | 2324.1404 | 2.0163  | <a href="#">NGAVSMGNRSAAPSVPGSDARPAR</a> |                            |

Mascot: <http://www.matrixscience.com/>

# MASCOT SCIENCE Mascot Search Results

## Peptide View

MS/MS Fragmentation of **ADGTVNQIEGEATPVNLTEPAK**

Found in **C9JF17** in **con\_Xuniprot\_HUMAN3**, C9JF17\_HUMAN Apolipoprotein D (Fragment) OS=Homo sapiens GN=APOD PE=2 SV=1

Match to Query 15109: 2254.107748 from(1128.061150,2+) intensity(46238.7109) rtinseconds(1290) scans(3297) index(19504)

Title: 111019\_Est\_ML\_YP\_G\_09Spectrum2913\_scans\_\_3297

Data file C:\mascot\20140703\_Tmgf\_1D\CSV\_UseAnalysis\MasterCSV\All\_Glyco\mgf\ptm\UC18ERLIC\_PTM\_35D.mgf

Click mouse within plot area to zoom in by factor of two about that point

Or, to Da

Label all possible matches Label matches used for scoring

Show Y-axis

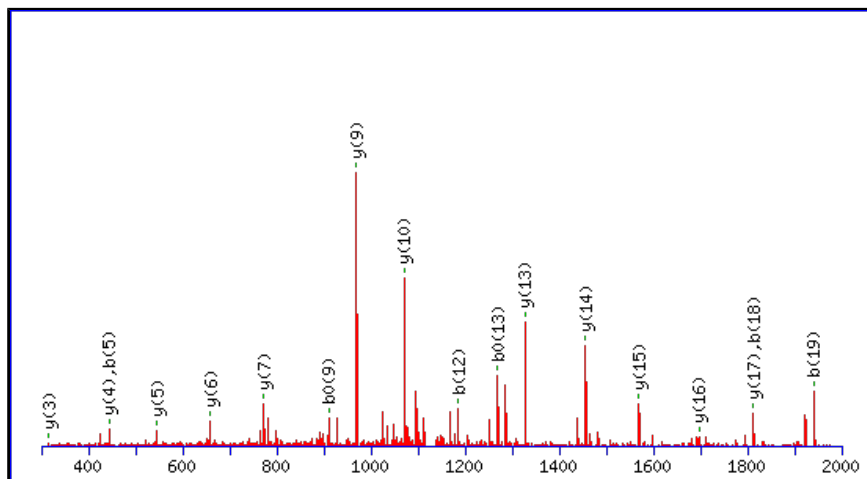

Monoisotopic mass of neutral peptide Mr(calc): 2254.0965

Fixed modifications: Carbamidomethyl (C) (apply to specified residues or termini only)

Variable modifications:

N16 : Deamidated (NQ)

Ions Score: 115 Expect: 9.9e-010

Matches : 18/234 fragment ions using 17 most intense peaks ([help](#))

| #  | b                | b <sup>++</sup> | b <sup>*</sup> | b <sup>*++</sup> | b <sup>0</sup>   | b <sup>0++</sup> | Seq. | y                | y <sup>++</sup> | y <sup>*</sup> | y <sup>*++</sup> | y <sup>0</sup> | y <sup>0++</sup> | #  |
|----|------------------|-----------------|----------------|------------------|------------------|------------------|------|------------------|-----------------|----------------|------------------|----------------|------------------|----|
| 1  | 72.0444          | 36.5258         |                |                  |                  |                  | A    |                  |                 |                |                  |                |                  | 22 |
| 2  | 187.0713         | 94.0393         |                |                  | 169.0608         | 85.0340          | D    | 2184.0667        | 1092.5370       | 2167.0401      | 1084.0237        | 2166.0561      | 1083.5317        | 21 |
| 3  | 244.0928         | 122.5500        |                |                  | 226.0822         | 113.5448         | G    | 2069.0397        | 1035.0235       | 2052.0132      | 1026.5102        | 2051.0291      | 1026.0182        | 20 |
| 4  | 345.1405         | 173.0739        |                |                  | 327.1299         | 164.0686         | T    | 2012.0182        | 1006.5128       | 1994.9917      | 997.9995         | 1994.0077      | 997.5075         | 19 |
| 5  | <b>444.2089</b>  | 222.6081        |                |                  | 426.1983         | 213.6028         | V    | 1910.9706        | 955.9889        | 1893.9440      | 947.4756         | 1892.9600      | 946.9836         | 18 |
| 6  | 558.2518         | 279.6295        | 541.2253       | 271.1163         | 540.2413         | 270.6243         | N    | <b>1811.9022</b> | 906.4547        | 1794.8756      | 897.9414         | 1793.8916      | 897.4494         | 17 |
| 7  | 686.3104         | 343.6588        | 669.2838       | 335.1456         | 668.2998         | 334.6536         | Q    | <b>1697.8592</b> | 849.4333        | 1680.8327      | 840.9200         | 1679.8487      | 840.4280         | 16 |
| 8  | 799.3945         | 400.2009        | 782.3679       | 391.6876         | 781.3839         | 391.1956         | I    | <b>1569.8006</b> | 785.4040        | 1552.7741      | 776.8907         | 1551.7901      | 776.3987         | 15 |
| 9  | 928.4371         | 464.7222        | 911.4105       | 456.2089         | <b>910.4265</b>  | 455.7169         | E    | <b>1456.7166</b> | 728.8619        | 1439.6900      | 720.3487         | 1438.7060      | 719.8566         | 14 |
| 10 | 985.4585         | 493.2329        | 968.4320       | 484.7196         | 967.4480         | 484.2276         | G    | <b>1327.6740</b> | 664.3406        | 1310.6474      | 655.8274         | 1309.6634      | 655.3354         | 13 |
| 11 | 1114.5011        | 557.7542        | 1097.4746      | 549.2409         | 1096.4905        | 548.7489         | E    | 1270.6525        | 635.8299        | 1253.6260      | 627.3166         | 1252.6420      | 626.8246         | 12 |
| 12 | <b>1185.5382</b> | 593.2727        | 1168.5117      | 584.7595         | 1167.5277        | 584.2675         | A    | 1141.6099        | 571.3086        | 1124.5834      | 562.7953         | 1123.5994      | 562.3033         | 11 |
| 13 | 1286.5859        | 643.7966        | 1269.5594      | 635.2833         | <b>1268.5753</b> | 634.7913         | T    | <b>1070.5728</b> | 535.7900        | 1053.5463      | 527.2768         | 1052.5623      | 526.7848         | 10 |
| 14 | 1383.6387        | 692.3230        | 1366.6121      | 683.8097         | 1365.6281        | 683.3177         | P    | <b>969.5251</b>  | 485.2662        | 952.4986       | 476.7529         | 951.5146       | 476.2609         | 9  |
| 15 | 1482.7071        | 741.8572        | 1465.6805      | 733.3439         | 1464.6965        | 732.8519         | V    | 872.4724         | 436.7398        | 855.4458       | 428.2266         | 854.4618       | 427.7345         | 8  |
| 16 | 1597.7340        | 799.3706        | 1580.7075      | 790.8574         | 1579.7235        | 790.3654         | N    | <b>773.4040</b>  | 387.2056        | 756.3774       | 378.6923         | 755.3934       | 378.2003         | 7  |
| 17 | 1710.8181        | 855.9127        | 1693.7915      | 847.3994         | 1692.8075        | 846.9074         | L    | <b>658.3770</b>  | 329.6921        | 641.3505       | 321.1789         | 640.3665       | 320.6869         | 6  |
| 18 | <b>1811.8658</b> | 906.4365        | 1794.8392      | 897.9232         | 1793.8552        | 897.4312         | T    | <b>545.2930</b>  | 273.1501        | 528.2664       | 264.6368         | 527.2824       | 264.1448         | 5  |
| 19 | <b>1940.9084</b> | 970.9578        | 1923.8818      | 962.4445         | 1922.8978        | 961.9525         | E    | <b>444.2453</b>  | 222.6263        | 427.2187       | 214.1130         | 426.2347       | 213.6210         | 4  |
| 20 | 2037.9611        | 1019.4842       | 2020.9346      | 1010.9709        | 2019.9506        | 1010.4789        | P    | <b>315.2027</b>  | 158.1050        | 298.1761       | 149.5917         |                |                  | 3  |
| 21 | 2108.9982        | 1055.0028       | 2091.9717      | 1046.4895        | 2090.9877        | 1045.9975        | A    | 218.1499         | 109.5786        | 201.1234       | 101.0653         |                |                  | 2  |
| 22 |                  |                 |                |                  |                  |                  | K    | 147.1128         | 74.0600         | 130.0863       | 65.5468          |                |                  | 1  |

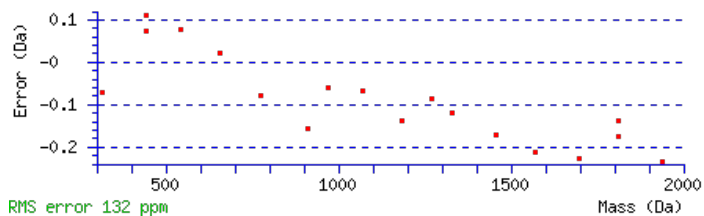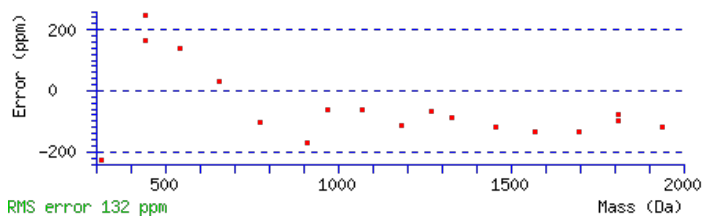

NCBI BLAST search of [ADGTVNQIEGEATPVNLTEPAK](#)

(Parameters: blastp, nr protein database, expect=20000, no filter, PAM30)

Other BLAST [web gateways](#)

All matches to this query

| Score | Mr(calc)  | Delta   | Sequence                               | Site Analysis          |
|-------|-----------|---------|----------------------------------------|------------------------|
| 114.6 | 2254.0965 | 0.0113  | <a href="#">ADGTVNQIEGEATPVNLTEPAK</a> | Deamidated N16 100.00% |
| 31.3  | 2254.0965 | 0.0113  | <a href="#">ADGTVNQIEGEATPVNLTEPAK</a> | Deamidated Q7 0.00%    |
| 31.3  | 2254.0965 | 0.0113  | <a href="#">ADGTVNQIEGEATPVNLTEPAK</a> | Deamidated N6 0.00%    |
| 23.6  | 2253.1125 | 0.9953  | <a href="#">ADGTVNQIEGEATPVNLTEPAK</a> |                        |
| 6.0   | 2254.1092 | -0.0015 | <a href="#">MPAGGQAPQLTPVIPAFWEAR</a>  |                        |
| 1.1   | 2254.1025 | 0.0053  | <a href="#">CRDLLDEARNYHLHLSSR</a>     |                        |

Mascot: <http://www.matrixscience.com/>

# MATRIX SCIENCE Mascot Search Results

## Peptide View

MS/MS Fragmentation of **ADGTVNQIEGEATPVNLTPEPAKLEVK**

Found in **C9JF17** in **con\_Xuniprot\_HUMAN3**, C9JF17\_HUMAN Apolipoprotein D (Fragment) OS=Homo sapiens GN=APOD PE=2 SV=1

Match to Query 25423: 2723.396172 from(908.806000,3+) intensity(1265734.1250) rtinseconds(1626) scans(3862) index(10157)

Title: 111019\_Est\_ISCardio\_NMI\_YS\_G\_6Spectrum3271\_scans\_\_3862

Data file C:\mascot\20140703\_Tmgf\_1D\CSV\_UseAnalysis\MasterCSV\All\_Glyco\mgf\ptm\UC18ERLIC\_PTM\_35D.mgf

Click mouse within plot area to zoom in by factor of two about that point

Or,  to  Da

Label all possible matches  Label matches used for scoring

Show Y-axis

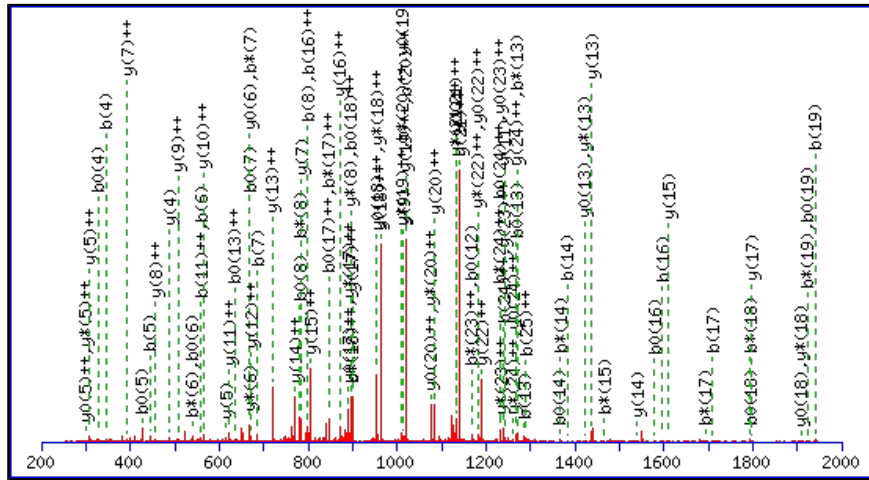

Monoisotopic mass of neutral peptide Mr(calc): 2723.3865

Fixed modifications: Carbamidomethyl (C) (apply to specified residues or termini only)

Variable modifications: Carbamidomethyl (C)

N16 : Deamidated (NQ)

Ions Score: 104 Expect: 8.4e-009

Matches : 97/284 fragment ions using 153 most intense peaks ([help](#))

| #  | b         | b <sup>++</sup> | b <sup>*</sup> | b <sup>*++</sup> | b <sup>0</sup> | b <sup>0++</sup> | Seq. | y         | y <sup>++</sup> | y <sup>*</sup> | y <sup>*++</sup> | y <sup>0</sup> | y <sup>0++</sup> | #  |
|----|-----------|-----------------|----------------|------------------|----------------|------------------|------|-----------|-----------------|----------------|------------------|----------------|------------------|----|
| 1  | 72.0444   | 36.5258         |                |                  |                |                  | A    |           |                 |                |                  |                |                  | 26 |
| 2  | 187.0713  | 94.0393         |                |                  | 169.0608       | 85.0340          | D    | 2653.3567 | 1327.1820       | 2636.3301      | 1318.6687        | 2635.3461      | 1318.1767        | 25 |
| 3  | 244.0928  | 122.5500        |                |                  | 226.0822       | 113.5448         | G    | 2538.3297 | 1269.6685       | 2521.3032      | 1261.1552        | 2520.3192      | 1260.6632        | 24 |
| 4  | 345.1405  | 173.0739        |                |                  | 327.1299       | 164.0686         | T    | 2481.3083 | 1241.1578       | 2464.2817      | 1232.6445        | 2463.2977      | 1232.1525        | 23 |
| 5  | 444.2089  | 222.6081        |                |                  | 426.1983       | 213.6028         | V    | 2380.2606 | 1190.6339       | 2363.2340      | 1182.1207        | 2362.2500      | 1181.6287        | 22 |
| 6  | 558.2518  | 279.6295        | 541.2253       | 271.1163         | 540.2413       | 270.6243         | N    | 2281.1922 | 1141.0997       | 2264.1656      | 1132.5865        | 2263.1816      | 1132.0944        | 21 |
| 7  | 686.3104  | 343.6588        | 669.2838       | 335.1456         | 668.2998       | 334.6536         | Q    | 2167.1493 | 1084.0783       | 2150.1227      | 1075.5650        | 2149.1387      | 1075.0730        | 20 |
| 8  | 799.3945  | 400.2009        | 782.3679       | 391.6876         | 781.3839       | 391.1956         | I    | 2039.0907 | 1020.0490       | 2022.0641      | 1011.5357        | 2021.0801      | 1011.0437        | 19 |
| 9  | 928.4371  | 464.7222        | 911.4105       | 456.2089         | 910.4265       | 455.7169         | E    | 1926.0066 | 963.5069        | 1908.9801      | 954.9937         | 1907.9961      | 954.5017         | 18 |
| 10 | 985.4585  | 493.2329        | 968.4320       | 484.7196         | 967.4480       | 484.2276         | G    | 1796.9640 | 898.9856        | 1779.9375      | 890.4724         | 1778.9535      | 889.9804         | 17 |
| 11 | 1114.5011 | 557.7542        | 1097.4746      | 549.2409         | 1096.4905      | 548.7489         | E    | 1739.9426 | 870.4749        | 1722.9160      | 861.9616         | 1721.9320      | 861.4696         | 16 |
| 12 | 1185.5382 | 593.2727        | 1168.5117      | 584.7595         | 1167.5277      | 584.2675         | A    | 1610.9000 | 805.9536        | 1593.8734      | 797.4403         | 1592.8894      | 796.9483         | 15 |
| 13 | 1286.5859 | 643.7966        | 1269.5594      | 635.2833         | 1268.5753      | 634.7913         | T    | 1539.8629 | 770.4351        | 1522.8363      | 761.9218         | 1521.8523      | 761.4298         | 14 |
| 14 | 1383.6387 | 692.3230        | 1366.6121      | 683.8097         | 1365.6281      | 683.3177         | P    | 1438.8152 | 719.9112        | 1421.7886      | 711.3980         | 1420.8046      | 710.9059         | 13 |
| 15 | 1482.7071 | 741.8572        | 1465.6805      | 733.3439         | 1464.6965      | 732.8519         | V    | 1341.7624 | 671.3848        | 1324.7359      | 662.8716         | 1323.7518      | 662.3796         | 12 |
| 16 | 1597.7340 | 799.3706        | 1580.7075      | 790.8574         | 1579.7235      | 790.3654         | N    | 1242.6940 | 621.8506        | 1225.6674      | 613.3374         | 1224.6834      | 612.8454         | 11 |
| 17 | 1710.8181 | 855.9127        | 1693.7915      | 847.3994         | 1692.8075      | 846.9074         | L    | 1127.6671 | 564.3372        | 1110.6405      | 555.8239         | 1109.6565      | 555.3319         | 10 |
| 18 | 1811.8658 | 906.4365        | 1794.8392      | 897.9232         | 1793.8552      | 897.4312         | T    | 1014.5830 | 507.7951        | 997.5564       | 499.2819         | 996.5724       | 498.7898         | 9  |
| 19 | 1940.9084 | 970.9578        | 1923.8818      | 962.4445         | 1922.8978      | 961.9525         | E    | 913.5353  | 457.2713        | 896.5088       | 448.7580         | 895.5247       | 448.2660         | 8  |
| 20 | 2037.9611 | 1019.4842       | 2020.9346      | 1010.9709        | 2019.9506      | 1010.4789        | P    | 784.4927  | 392.7500        | 767.4662       | 384.2367         | 766.4822       | 383.7447         | 7  |
| 21 | 2108.9982 | 1055.0028       | 2091.9717      | 1046.4895        | 2090.9877      | 1045.9975        | A    | 687.4400  | 344.2236        | 670.4134       | 335.7103         | 669.4294       | 335.2183         | 6  |
| 22 | 2237.0932 | 1119.0502       | 2220.0667      | 1110.5370        | 2219.0826      | 1110.0450        | K    | 616.4028  | 308.7051        | 599.3763       | 300.1918         | 598.3923       | 299.6998         | 5  |
| 23 | 2350.1773 | 1175.5923       | 2333.1507      | 1167.0790        | 2332.1667      | 1166.5870        | L    | 488.3079  | 244.6576        | 471.2813       | 236.1443         | 470.2973       | 235.6523         | 4  |

|    |           |           |           |           |           |           |   |          |          |          |          |          |          |   |
|----|-----------|-----------|-----------|-----------|-----------|-----------|---|----------|----------|----------|----------|----------|----------|---|
| 24 | 2479.2199 | 1240.1136 | 2462.1933 | 1231.6003 | 2461.2093 | 1231.1083 | E | 375.2238 | 188.1155 | 358.1973 | 179.6023 | 357.2132 | 179.1103 | 3 |
| 25 | 2578.2883 | 1289.6478 | 2561.2617 | 1281.1345 | 2560.2777 | 1280.6425 | V | 246.1812 | 123.5942 | 229.1547 | 115.0810 |          |          | 2 |
| 26 |           |           |           |           |           |           | K | 147.1128 | 74.0600  | 130.0863 | 65.5468  |          |          | 1 |

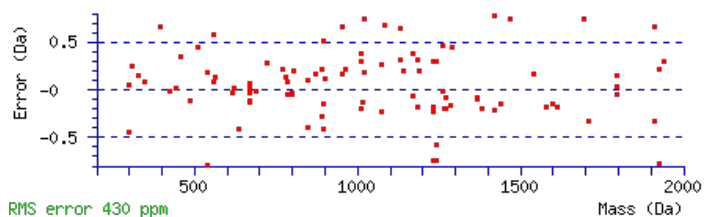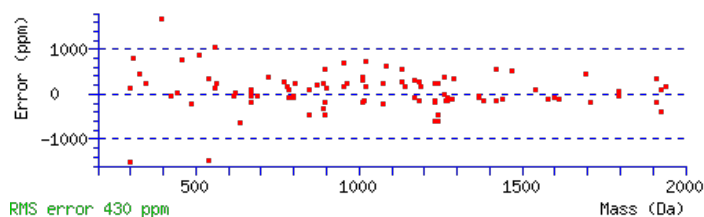

NCBI BLAST search of [ADGTVNQIEGEATPVNLTEPAKLEVK](#)  
 (Parameters: blastp, nr protein database, expect=20000, no filter, PAM30)  
 Other BLAST [web gateways](#)

All matches to this query

| Score | Mr(calc)  | Delta   | Sequence                                   | Site Analysis         |
|-------|-----------|---------|--------------------------------------------|-----------------------|
| 104.3 | 2723.3865 | 0.0097  | <a href="#">ADGTVNQIEGEATPVNLTEPAKLEVK</a> | Deamidated N16 41.22% |
| 103.8 | 2723.3865 | 0.0097  | <a href="#">ADGTVNQIEGEATPVNLTEPAKLEVK</a> | Deamidated Q7 36.65%  |
| 101.6 | 2723.3865 | 0.0097  | <a href="#">ADGTVNQIEGEATPVNLTEPAKLEVK</a> | Deamidated N6 22.13%  |
| 99.7  | 2722.4025 | 0.9937  | <a href="#">ADGTVNQIEGEATPVNLTEPAKLEVK</a> |                       |
| 11.6  | 2723.4024 | -0.0063 | <a href="#">ASNVASIKTMLPGEHQVLSNLQSR</a>   |                       |
| 10.9  | 2723.4071 | -0.0109 | <a href="#">LAOLLEGYARYSVSVFQPPFQGR</a>    |                       |
| 8.7   | 2722.3862 | 1.0100  | <a href="#">DLFLQMMDEWFLLPKELLRR</a>       |                       |
| 7.8   | 2722.3894 | 1.0068  | <a href="#">LTVQDIQALEHKPAKASMMQPAR</a>    |                       |
| 4.2   | 2723.4071 | -0.0109 | <a href="#">LAOLLEGYARYSVSVFQPPFQGR</a>    |                       |
| 3.2   | 2723.3912 | 0.0050  | <a href="#">EITTAGKNNDMGGVAYLTGVTSKRPK</a> |                       |

Mascot: <http://www.matrixscience.com/>



# MASCOT SCIENCE Mascot Search Results

## Peptide View

MS/MS Fragmentation of **CIQANYSLMENGK**

Found in **C9JF17** in **con\_Xuniprot\_HUMAN3**, C9JF17\_HUMAN Apolipoprotein D (Fragment) OS=Homo sapiens GN=APOD PE=2 SV=1

Match to Query 6928: 1543.669928 from(772.842240,2+) intensity(13099.6836) rtinseconds(568) scans(1276) index(24372)

Title: 111019\_Est\_MI\_YS\_G\_06Spectrum1096\_scans\_1276

Data file C:\\mascot\\20140703\_Tmgf\_1D\\CSV\_UseAnalysis\\MasterCSV\\All\_Glyco\\mgf\\ptm\\UC18ERLIC\_PTM\_35D.mgf

Click mouse within plot area to zoom in by factor of two about that point

Or, to Da

Label all possible matches Label matches used for scoring

Show Y-axis

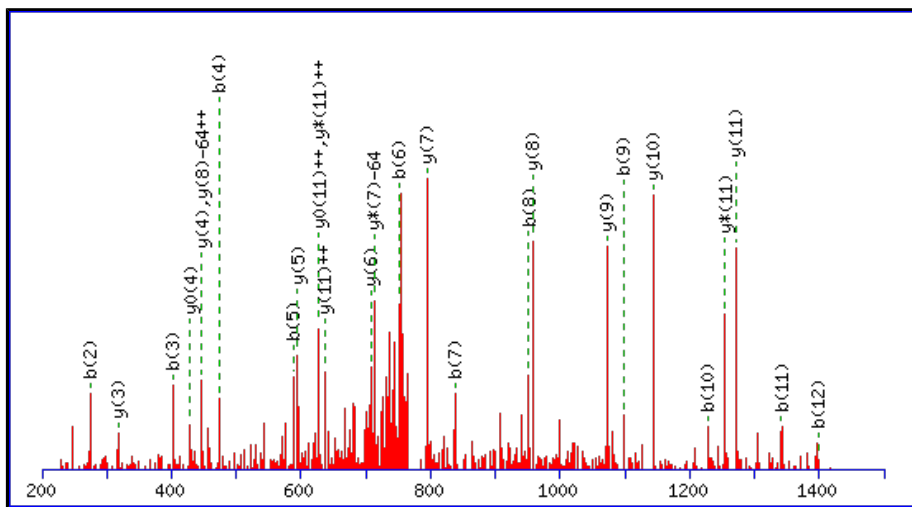

Monoisotopic mass of neutral peptide Mr(calc): 1543.6646

Fixed modifications: Carbamidomethyl (C) (apply to specified residues or termini only)

Variable modifications:

N5 : Deamidated (NQ)

M9 : Oxidation (M), with neutral losses 0.0000(shown in table), 63.9983

Ions Score: 89 Expect: 9.9e-008

Matches : 27/194 fragment ions using 36 most intense peaks ([help](#))

| #  | b                | b <sup>++</sup> | b*        | b <sup>+++</sup> | b <sup>0</sup> | b <sup>0++</sup> | Seq. | y                | y <sup>++</sup> | y*               | y <sup>+++</sup> | y <sup>0</sup>  | y <sup>0++</sup> | #  |
|----|------------------|-----------------|-----------|------------------|----------------|------------------|------|------------------|-----------------|------------------|------------------|-----------------|------------------|----|
| 1  | 161.0379         | 81.0226         |           |                  |                |                  | C    |                  |                 |                  |                  |                 |                  | 13 |
| 2  | <b>274.1220</b>  | 137.5646        |           |                  |                |                  | I    | 1384.6413        | 692.8243        | 1367.6148        | 684.3110         | 1366.6307       | 683.8190         | 12 |
| 3  | <b>402.1806</b>  | 201.5939        | 385.1540  | 193.0806         |                |                  | Q    | <b>1271.5572</b> | <b>636.2823</b> | <b>1254.5307</b> | <b>627.7690</b>  | 1253.5467       | <b>627.2770</b>  | 11 |
| 4  | <b>473.2177</b>  | 237.1125        | 456.1911  | 228.5992         |                |                  | A    | <b>1143.4987</b> | 572.2530        | 1126.4721        | 563.7397         | 1125.4881       | 563.2477         | 10 |
| 5  | <b>588.2446</b>  | 294.6260        | 571.2181  | 286.1127         |                |                  | N    | <b>1072.4616</b> | 536.7344        | 1055.4350        | 528.2211         | 1054.4510       | 527.7291         | 9  |
| 6  | <b>751.3080</b>  | 376.1576        | 734.2814  | 367.6443         |                |                  | Y    | <b>957.4346</b>  | 479.2209        | 940.4081         | 470.7077         | 939.4240        | 470.2157         | 8  |
| 7  | <b>838.3400</b>  | 419.6736        | 821.3134  | 411.1604         | 820.3294       | 410.6683         | S    | <b>794.3713</b>  | 397.6893        | 777.3447         | 389.1760         | 776.3607        | 388.6840         | 7  |
| 8  | <b>951.4240</b>  | 476.2157        | 934.3975  | 467.7024         | 933.4135       | 467.2104         | L    | <b>707.3393</b>  | 354.1733        | 690.3127         | 345.6600         | 689.3287        | 345.1680         | 6  |
| 9  | <b>1098.4594</b> | 549.7334        | 1081.4329 | 541.2201         | 1080.4489      | 540.7281         | M    | <b>594.2552</b>  | 297.6312        | 577.2286         | 289.1180         | 576.2446        | 288.6259         | 5  |
| 10 | <b>1227.5020</b> | 614.2547        | 1210.4755 | 605.7414         | 1209.4915      | 605.2494         | E    | <b>447.2198</b>  | 224.1135        | 430.1932         | 215.6003         | <b>429.2092</b> | 215.1082         | 4  |
| 11 | <b>1341.5450</b> | 671.2761        | 1324.5184 | 662.7628         | 1323.5344      | 662.2708         | N    | <b>318.1772</b>  | 159.5922        | 301.1506         | 151.0790         |                 |                  | 3  |
| 12 | <b>1398.5664</b> | 699.7869        | 1381.5399 | 691.2736         | 1380.5559      | 690.7816         | G    | 204.1343         | 102.5708        | 187.1077         | 94.0575          |                 |                  | 2  |
| 13 |                  |                 |           |                  |                |                  | K    | 147.1128         | 74.0600         | 130.0863         | 65.5468          |                 |                  | 1  |

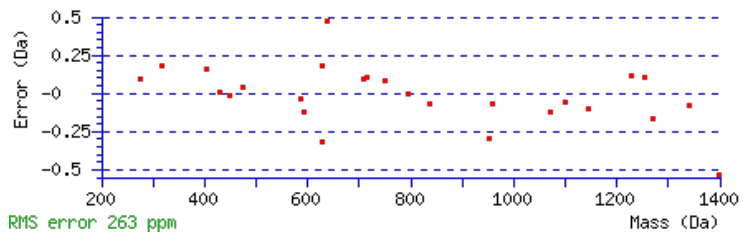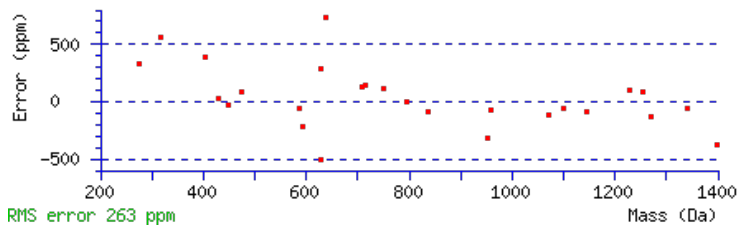

NCBI BLAST search of [CIQANYSLMENGK](#)

(Parameters: blastp, nr protein database, expect=20000, no filter, PAM30)

Other BLAST [web gateways](#)

**All matches to this query**

| Score | Mr(calc)  | Delta   | Sequence                       | Site Analysis        |
|-------|-----------|---------|--------------------------------|----------------------|
| 89.1  | 1543.6646 | 0.0053  | <a href="#">CIQANYSLMENGK</a>  | Deamidated N5 98.92% |
| 69.5  | 1543.6646 | 0.0053  | <a href="#">CIQANYSLMENGK</a>  | Deamidated Q3 1.08%  |
| 26.1  | 1543.6646 | 0.0053  | <a href="#">CIQANYSLMENGK</a>  | Deamidated N11 0.00% |
| 7.4   | 1542.6741 | 0.9958  | <a href="#">SPSTWMMSMRAAR</a>  |                      |
| 5.8   | 1543.6725 | -0.0026 | <a href="#">SWTFGQSAQAMASR</a> |                      |
| 2.0   | 1542.6741 | 0.9958  | <a href="#">SPSTWMMSMRAAR</a>  |                      |
| 1.9   | 1542.6741 | 0.9958  | <a href="#">SPSTWMMSMRAAR</a>  |                      |

Mascot: <http://www.matrixscience.com/>

# MASCOT SCIENCE Mascot Search Results

## Peptide View

MS/MS Fragmentation of **CIQANYSLMENGK**

Found in **C9JF17** in **con\_Xuniprot\_HUMAN3**, C9JF17\_HUMAN Apolipoprotein D (Fragment) OS=Homo sapiens GN=APOD PE=2 SV=1

Match to Query 6896: 1527.674068 from(764.844310,2+) intensity(161547.2813) rtinseconds(990) scans(2222) index(12413)

Title: 111019\_Est\_ISCardio\_NMI\_YS\_G\_9Spectrum1920\_scans\_\_2222

Data file C:\\mascot\\20140703\_Tmgf\_1D\\CSV\_UseAnalysis\\MasterCSV\\All\_Glyco\\mgf\\ptm\\UC18ERLIC\_PTM\_35D.mgf

Click mouse within plot area to zoom in by factor of two about that point

Or, to Da

Label all possible matches Label matches used for scoring

Show Y-axis

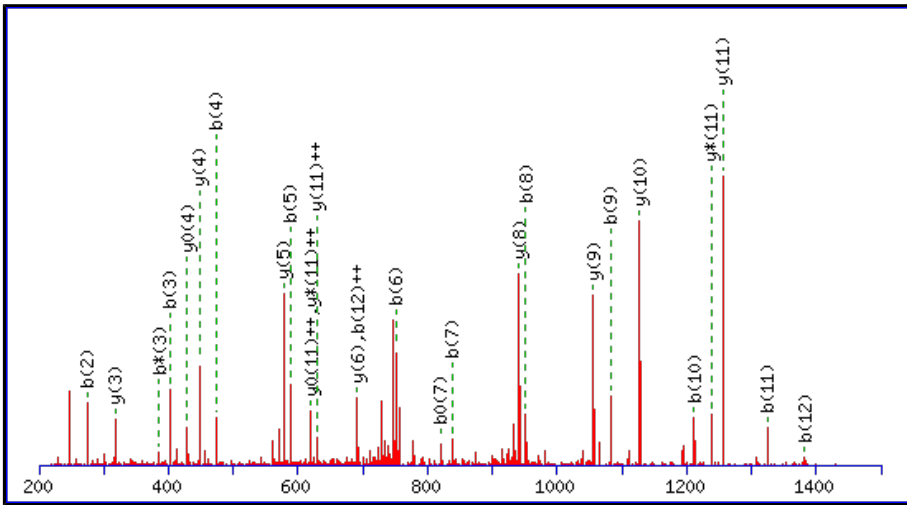

Monoisotopic mass of neutral peptide Mr(calc): 1527.6697

Fixed modifications: Carbamidomethyl (C) (apply to specified residues or termini only)

Variable modifications: N5 : Deamidated (NQ)

Ions Score: 88 Expect: 1.5e-007

Matches : 27/122 fragment ions using 37 most intense peaks ([help](#))

| #  | b                | b <sup>++</sup> | b <sup>*</sup>  | b <sup>***</sup> | b <sup>0</sup>  | b <sup>0++</sup> | Seq. | y                | y <sup>++</sup> | y <sup>*</sup>   | y <sup>***</sup> | y <sup>0</sup>  | y <sup>0++</sup> | #  |
|----|------------------|-----------------|-----------------|------------------|-----------------|------------------|------|------------------|-----------------|------------------|------------------|-----------------|------------------|----|
| 1  | 161.0379         | 81.0226         |                 |                  |                 |                  | C    |                  |                 |                  |                  |                 |                  | 13 |
| 2  | <b>274.1220</b>  | 137.5646        |                 |                  |                 |                  | I    | 1368.6464        | 684.8268        | 1351.6198        | 676.3136         | 1350.6358       | 675.8216         | 12 |
| 3  | <b>402.1806</b>  | 201.5939        | <b>385.1540</b> | 193.0806         |                 |                  | Q    | <b>1255.5623</b> | <b>628.2848</b> | <b>1238.5358</b> | <b>619.7715</b>  | 1237.5518       | <b>619.2795</b>  | 11 |
| 4  | <b>473.2177</b>  | 237.1125        | 456.1911        | 228.5992         |                 |                  | A    | <b>1127.5038</b> | 564.2555        | 1110.4772        | 555.7422         | 1109.4932       | 555.2502         | 10 |
| 5  | <b>588.2446</b>  | 294.6260        | 571.2181        | 286.1127         |                 |                  | N    | <b>1056.4666</b> | 528.7370        | 1039.4401        | 520.2237         | 1038.4561       | 519.7317         | 9  |
| 6  | <b>751.3080</b>  | 376.1576        | 734.2814        | 367.6443         |                 |                  | Y    | <b>941.4397</b>  | 471.2235        | 924.4131         | 462.7102         | 923.4291        | 462.2182         | 8  |
| 7  | <b>838.3400</b>  | 419.6736        | 821.3134        | 411.1604         | <b>820.3294</b> | 410.6683         | S    | 778.3764         | 389.6918        | 761.3498         | 381.1785         | 760.3658        | 380.6865         | 7  |
| 8  | <b>951.4240</b>  | 476.2157        | 934.3975        | 467.7024         | 933.4135        | 467.2104         | L    | <b>691.3443</b>  | 346.1758        | 674.3178         | 337.6625         | 673.3338        | 337.1705         | 6  |
| 9  | <b>1082.4645</b> | 541.7359        | 1065.4380       | 533.2226         | 1064.4540       | 532.7306         | M    | <b>578.2603</b>  | 289.6338        | 561.2337         | 281.1205         | 560.2497        | 280.6285         | 5  |
| 10 | <b>1211.5071</b> | 606.2572        | 1194.4806       | 597.7439         | 1193.4966       | 597.2519         | E    | <b>447.2198</b>  | 224.1135        | 430.1932         | 215.6003         | <b>429.2092</b> | 215.1082         | 4  |
| 11 | <b>1325.5501</b> | 663.2787        | 1308.5235       | 654.7654         | 1307.5395       | 654.2734         | N    | <b>318.1772</b>  | 159.5922        | 301.1506         | 151.0790         |                 |                  | 3  |
| 12 | <b>1382.5715</b> | <b>691.7894</b> | 1365.5450       | 683.2761         | 1364.5609       | 682.7841         | G    | 204.1343         | 102.5708        | 187.1077         | 94.0575          |                 |                  | 2  |
| 13 |                  |                 |                 |                  |                 |                  | K    | 147.1128         | 74.0600         | 130.0863         | 65.5468          |                 |                  | 1  |

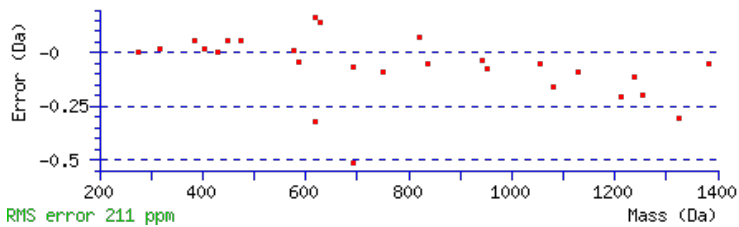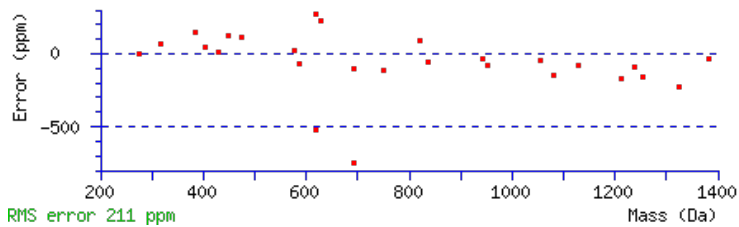

NCBI **BLAST** search of [CIQANYSLMENGK](#)

(Parameters: blastp, nr protein database, expect=20000, no filter, PAM30)

Other BLAST [web gateways](#)

**All matches to this query**

| Score | Mr(calc)  | Delta  | Sequence                       | Site Analysis        |
|-------|-----------|--------|--------------------------------|----------------------|
| 88.0  | 1527.6697 | 0.0043 | <a href="#">CIQANYSLMENGK</a>  | Deamidated N5 99.76% |
| 61.7  | 1527.6697 | 0.0043 | <a href="#">CIQANYSLMENGK</a>  | Deamidated Q3 0.24%  |
| 33.7  | 1527.6697 | 0.0043 | <a href="#">CIQANYSLMENGK</a>  | Deamidated N11 0.00% |
| 3.2   | 1527.6729 | 0.0012 | <a href="#">VEAFDNEFEATQK</a>  |                      |
| 1.9   | 1527.6697 | 0.0043 | <a href="#">WQMKQNETTAMK</a>   |                      |
| 1.1   | 1527.6689 | 0.0052 | <a href="#">NSNEQINAFSTSSK</a> |                      |

Mascot: <http://www.matrixscience.com/>

# MASCOT SCIENCE Mascot Search Results

## Peptide View

MS/MS Fragmentation of **CIQANYSLMENGK**

Found in **C9JF17** in **con\_Xuniprot\_HUMAN3**, C9JF17\_HUMAN Apolipoprotein D (Fragment) OS=Homo sapiens GN=APOD PE=2 SV=1

Match to Query 6931: 1544.648928 from(773.331740,2+) intensity(16872.2539) rtinseconds(716) scans(1528) index(6883)

Title: 111019\_Est\_ISCardio\_NMI\_YP\_G\_10Spectrum1298\_scans\_1528

Data file C:\mascot\20140703\_Tmgf\_1D\CSV\_UseAnalysis\MasterCSV\All\_Glyco\mgf\ptm\UC18ERLIC\_PTM\_35D.mgf

Click mouse within plot area to zoom in by factor of two about that point

Or, to Da

Label all possible matches Label matches used for scoring

Show Y-axis

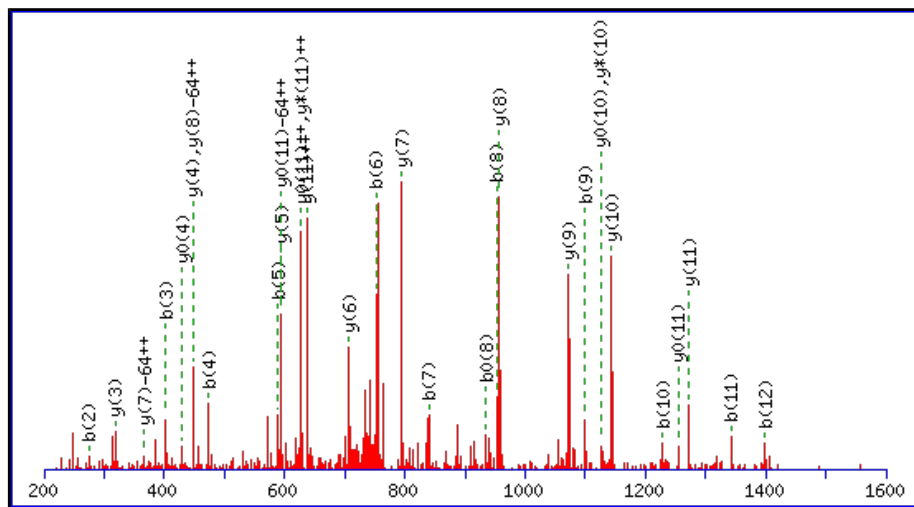

Monoisotopic mass of neutral peptide Mr(calc): 1544.6487

Fixed modifications: Carbamidomethyl (C) (apply to specified residues or termini only)

Variable modifications:

Q3 : Deamidated (NQ)

N5 : Deamidated (NQ)

M9 : Oxidation (M), with neutral losses 0.0000 (shown in table), 63.9983

Ions score: 80 Expect: 5e-007

Matches : 31/194 fragment ions using 49 most intense peaks ([help](#))

| #  | b                | b <sup>++</sup> | b*        | b <sup>++</sup> * | b <sup>0</sup>  | b <sup>0++</sup> | Seq. | y                | y <sup>++</sup> | y*               | y <sup>++</sup> * | y <sup>0</sup>   | y <sup>0++</sup> | #  |
|----|------------------|-----------------|-----------|-------------------|-----------------|------------------|------|------------------|-----------------|------------------|-------------------|------------------|------------------|----|
| 1  | 161.0379         | 81.0226         |           |                   |                 |                  | C    |                  |                 |                  |                   |                  |                  | 13 |
| 2  | <b>274.1220</b>  | 137.5646        |           |                   |                 |                  | I    | 1385.6253        | 693.3163        | 1368.5988        | 684.8030          | 1367.6148        | 684.3110         | 12 |
| 3  | <b>403.1646</b>  | 202.0859        | 386.1380  | 193.5727          |                 |                  | Q    | <b>1272.5413</b> | <b>636.7743</b> | 1255.5147        | <b>628.2610</b>   | <b>1254.5307</b> | <b>627.7690</b>  | 11 |
| 4  | <b>474.2017</b>  | 237.6045        | 457.1751  | 229.0912          |                 |                  | A    | <b>1143.4987</b> | 572.2530        | <b>1126.4721</b> | 563.7397          | <b>1125.4881</b> | 563.2477         | 10 |
| 5  | <b>589.2286</b>  | 295.1180        | 572.2021  | 286.6047          |                 |                  | N    | <b>1072.4616</b> | 536.7344        | 1055.4350        | 528.2211          | 1054.4510        | 527.7291         | 9  |
| 6  | <b>752.2920</b>  | 376.6496        | 735.2654  | 368.1363          |                 |                  | Y    | <b>957.4346</b>  | 479.2209        | 940.4081         | 470.7077          | 939.4240         | 470.2157         | 8  |
| 7  | <b>839.3240</b>  | 420.1656        | 822.2974  | 411.6524          | 821.3134        | 411.1604         | S    | <b>794.3713</b>  | 397.6893        | 777.3447         | 389.1760          | 776.3607         | 388.6840         | 7  |
| 8  | <b>952.4081</b>  | 476.7077        | 935.3815  | 468.1944          | <b>934.3975</b> | 467.7024         | L    | <b>707.3393</b>  | 354.1733        | 690.3127         | 345.6600          | 689.3287         | 345.1680         | 6  |
| 9  | <b>1099.4435</b> | 550.2254        | 1082.4169 | 541.7121          | 1081.4329       | 541.2201         | M    | <b>594.2552</b>  | 297.6312        | 577.2286         | 289.1180          | 576.2446         | 288.6259         | 5  |
| 10 | <b>1228.4861</b> | 614.7467        | 1211.4595 | 606.2334          | 1210.4755       | 605.7414         | E    | <b>447.2198</b>  | 224.1135        | 430.1932         | 215.6003          | <b>429.2092</b>  | 215.1082         | 4  |
| 11 | <b>1342.5290</b> | 671.7681        | 1325.5024 | 663.2549          | 1324.5184       | 662.7628         | N    | <b>318.1772</b>  | 159.5922        | 301.1506         | 151.0790          |                  |                  | 3  |
| 12 | <b>1399.5504</b> | 700.2789        | 1382.5239 | 691.7656          | 1381.5399       | 691.2736         | G    | 204.1343         | 102.5708        | 187.1077         | 94.0575           |                  |                  | 2  |
| 13 |                  |                 |           |                   |                 |                  | K    | 147.1128         | 74.0600         | 130.0863         | 65.5468           |                  |                  | 1  |

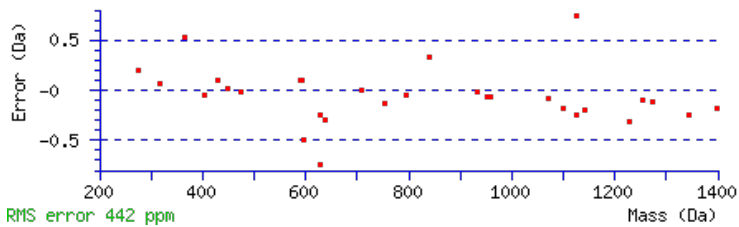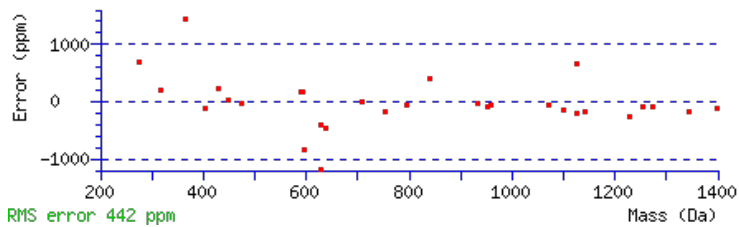

NCBI **BLAST** search of [CIQANYSLMENGK](#)

(Parameters: blastp, nr protein database, expect=20000, no filter, PAM30)

Other BLAST [web gateways](#)

**All matches to this query**

| Score | Mr(calc)  | Delta  | Sequence                      | Site Analysis            |
|-------|-----------|--------|-------------------------------|--------------------------|
| 80.1  | 1544.6487 | 0.0003 | <a href="#">CIQANYSLMENGK</a> | Deamidated Q3, N5 99.99% |
| 36.0  | 1544.6487 | 0.0003 | <a href="#">CIQANYSLMENGK</a> | Deamidated Q3, N11 0.00% |
| 31.2  | 1544.6487 | 0.0003 | <a href="#">CIQANYSLMENGK</a> | Deamidated N5, N11 0.00% |
| 5.4   | 1544.6422 | 0.0068 | <a href="#">KCNWKMGNTMDK</a>  |                          |
| 2.5   | 1543.6395 | 1.0094 | <a href="#">GSQCHTMHNLVNK</a> |                          |

**Mascot:** <http://www.matrixscience.com/>

# MATRIX SCIENCE Mascot Search Results

## Peptide View

MS/MS Fragmentation of **CIQANYSLMENGKIK**

Found in **C9JF17** in **con\_Xuniprot\_HUMAN3**, C9JF17\_HUMAN Apolipoprotein D (Fragment) OS=Homo sapiens GN=APOD PE=2 SV=1

Match to Query 10191: 1784.851008 from(893.432780,2+) intensity(11588.9356) rtinseconds(694) scans(1511) index(25188)

Title: 111019\_Est\_MI\_YS\_G\_07Spectrum1259\_scans\_1511

Data file C:\\mascot\\20140703\_Tmgf\_1D\\CSV\_UseAnalysis\\MasterCSV\\All\_Glyco\\mgf\\ptm\\UC18ERLIC\_PTM\_35D.mgf

Click mouse within plot area to zoom in by factor of two about that point

Or, to Da

Label all possible matches Label matches used for scoring

Show Y-axis

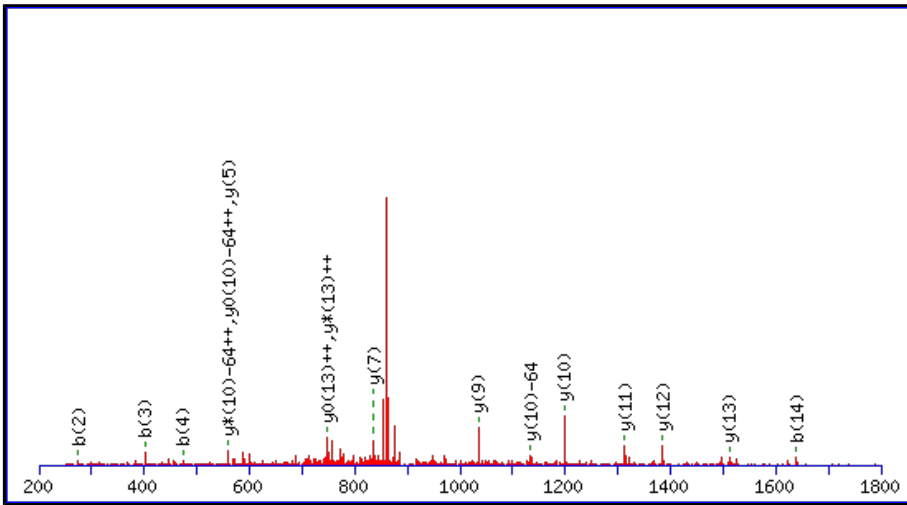

Monoisotopic mass of neutral peptide Mr(calc): 1784.8437

Fixed modifications: Carbamidomethyl (C) (apply to specified residues or termini only)

Variable modifications:

N5 : Deamidated (NQ)

M9 : Oxidation (M), with neutral losses 0.0000(shown in table), 63.9983

Ions Score: 60 Expect: 0.00022

Matches : 16/226 fragment ions using 15 most intense peaks ([help](#))

| #  | b                | b <sup>++</sup> | b <sup>*</sup> | b <sup>*++</sup> | b <sup>0</sup> | b <sup>0++</sup> | Seq. | y                | y <sup>++</sup> | y <sup>*</sup> | y <sup>*++</sup> | y <sup>0</sup> | y <sup>0++</sup> | #  |
|----|------------------|-----------------|----------------|------------------|----------------|------------------|------|------------------|-----------------|----------------|------------------|----------------|------------------|----|
| 1  | 161.0379         | 81.0226         |                |                  |                |                  | C    |                  |                 |                |                  |                |                  | 15 |
| 2  | <b>274.1220</b>  | 137.5646        |                |                  |                |                  | I    | 1625.8203        | 813.4138        | 1608.7938      | 804.9005         | 1607.8098      | 804.4085         | 14 |
| 3  | <b>402.1806</b>  | 201.5939        | 385.1540       | 193.0806         |                |                  | Q    | <b>1512.7363</b> | 756.8718        | 1495.7097      | <b>748.3585</b>  | 1494.7257      | <b>747.8665</b>  | 13 |
| 4  | <b>473.2177</b>  | 237.1125        | 456.1911       | 228.5992         |                |                  | A    | <b>1384.6777</b> | 692.8425        | 1367.6511      | 684.3292         | 1366.6671      | 683.8372         | 12 |
| 5  | 588.2446         | 294.6260        | 571.2181       | 286.1127         |                |                  | N    | <b>1313.6406</b> | 657.3239        | 1296.6140      | 648.8107         | 1295.6300      | 648.3186         | 11 |
| 6  | 751.3080         | 376.1576        | 734.2814       | 367.6443         |                |                  | Y    | <b>1198.6136</b> | 599.8105        | 1181.5871      | 591.2972         | 1180.6031      | 590.8052         | 10 |
| 7  | 838.3400         | 419.6736        | 821.3134       | 411.1604         | 820.3294       | 410.6683         | S    | <b>1035.5503</b> | 518.2788        | 1018.5238      | 509.7655         | 1017.5397      | 509.2735         | 9  |
| 8  | 951.4240         | 476.2157        | 934.3975       | 467.7024         | 933.4135       | 467.2104         | L    | 948.5183         | 474.7628        | 931.4917       | 466.2495         | 930.5077       | 465.7575         | 8  |
| 9  | 1098.4594        | 549.7334        | 1081.4329      | 541.2201         | 1080.4489      | 540.7281         | M    | <b>835.4342</b>  | 418.2207        | 818.4077       | 409.7075         | 817.4236       | 409.2155         | 7  |
| 10 | 1227.5020        | 614.2547        | 1210.4755      | 605.7414         | 1209.4915      | 605.2494         | E    | 688.3988         | 344.7030        | 671.3723       | 336.1898         | 670.3882       | 335.6978         | 6  |
| 11 | 1341.5450        | 671.2761        | 1324.5184      | 662.7628         | 1323.5344      | 662.2708         | N    | <b>559.3562</b>  | 280.1817        | 542.3297       | 271.6685         |                |                  | 5  |
| 12 | 1398.5664        | 699.7869        | 1381.5399      | 691.2736         | 1380.5559      | 690.7816         | G    | 445.3133         | 223.1603        | 428.2867       | 214.6470         |                |                  | 4  |
| 13 | 1526.6614        | 763.8343        | 1509.6348      | 755.3211         | 1508.6508      | 754.8291         | K    | 388.2918         | 194.6496        | 371.2653       | 186.1363         |                |                  | 3  |
| 14 | <b>1639.7455</b> | 820.3764        | 1622.7189      | 811.8631         | 1621.7349      | 811.3711         | I    | 260.1969         | 130.6021        | 243.1703       | 122.0888         |                |                  | 2  |
| 15 |                  |                 |                |                  |                |                  | K    | 147.1128         | 74.0600         | 130.0863       | 65.5468          |                |                  | 1  |



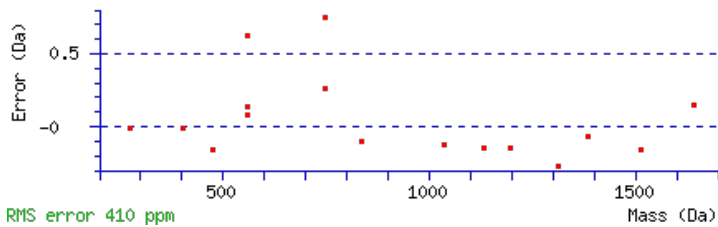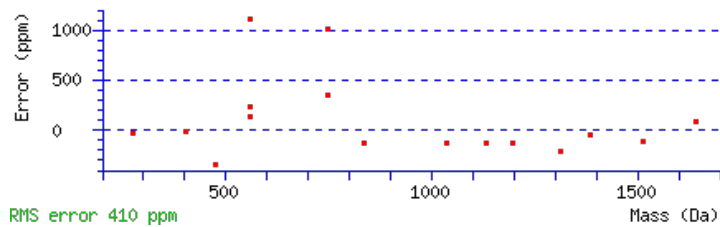

NCBI BLAST search of [CIQANYSLMENGKIK](#)

(Parameters: blastp, nr protein database, expect=20000, no filter, PAM30)

Other BLAST [web gateways](#)

**All matches to this query**

| Score | Mr(calc)  | Delta   | Sequence                           | Site Analysis        |
|-------|-----------|---------|------------------------------------|----------------------|
| 59.9  | 1784.8437 | 0.0073  | <a href="#">CIQANYSLMENGKIK</a>    | Deamidated N5 99.26% |
| 38.5  | 1784.8437 | 0.0073  | <a href="#">CIQANYSLMENGKIK</a>    | Deamidated Q3 0.72%  |
| 23.6  | 1784.8437 | 0.0073  | <a href="#">CIQANYSLMENGKIK</a>    | Deamidated N11 0.02% |
| 6.9   | 1784.8477 | 0.0033  | <a href="#">ICQPIMAVYATYDPK</a>    |                      |
| 2.1   | 1783.8563 | 0.9947  | <a href="#">MLSFTGPDFNAVSIGGR</a>  |                      |
| 1.7   | 1783.8561 | 0.9949  | <a href="#">RASGAGGQHVNTTDSAVR</a> |                      |
| 0.9   | 1784.8549 | -0.0039 | <a href="#">MLDNDLDRYTMVRK</a>     |                      |
| 0.8   | 1783.8410 | 1.0100  | <a href="#">MEIYGSAVADKLDNSR</a>   |                      |
| 0.3   | 1784.8590 | -0.0080 | <a href="#">LIMVQHWPETVCEK</a>     |                      |

Mascot: <http://www.matrixscience.com/>

# MATRIX SCIENCE Mascot Search Results

## Peptide View

MS/MS Fragmentation of **CIQANYSLMENGK**

Found in **C9JF17** in **con\_Xuniprot\_HUMAN3**, C9JF17\_HUMAN Apolipoprotein D (Fragment) OS=Homo sapiens GN=APOD PE=2 SV=1

Match to Query 6904: 1528.657388 from(765.335970,2+) intensity(21894.1172) rtinseconds(1031) scans(2274) index(13166)

Title: 111019\_Est\_ISCardio\_NMI\_YS\_G\_11Spectrum1963\_scans\_\_2274

Data file C:\mascot\20140703\_Tmgf\_1D\CSV\_UseAnalysis\MasterCSV\All\_Glyco\mgf\ptm\UC18ERLIC\_PTM\_35D.mgf

Click mouse within plot area to zoom in by factor of two about that point

Or, to Da

Label all possible matches Label matches used for scoring

Show Y-axis

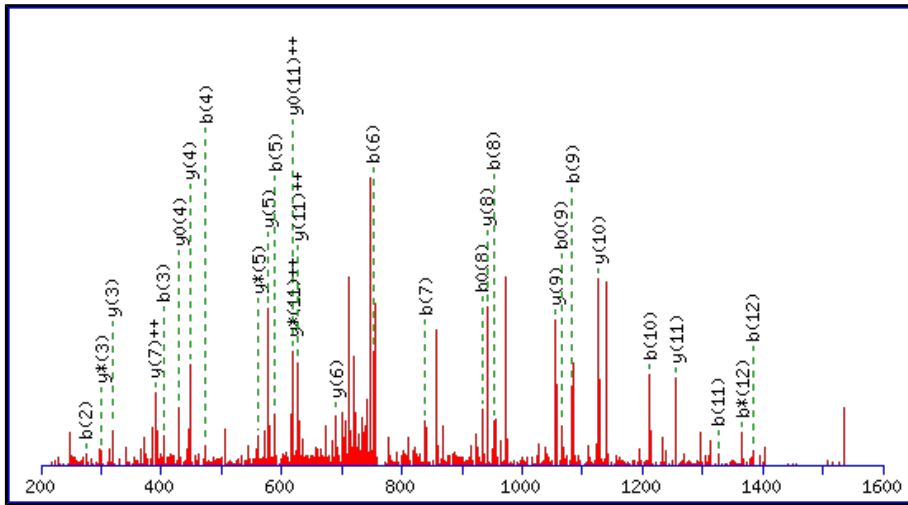

Monoisotopic mass of neutral peptide Mr(calc): 1528.6537

Fixed modifications: Carbamidomethyl (C) (apply to specified residues or termini only)

Variable modifications:

Q3 : Deamidated (NQ)

N5 : Deamidated (NQ)

Ions Score: 51 Expect: 0.00055

Matches : 29/122 fragment ions using 79 most intense peaks ([help](#))

| #  | b                | b <sup>++</sup> | b*               | b <sup>+++</sup> | b <sup>0</sup>   | b <sup>0++</sup> | Seq. | y                | y <sup>++</sup> | y*              | y <sup>+++</sup> | y <sup>0</sup>  | y <sup>0++</sup> | #  |
|----|------------------|-----------------|------------------|------------------|------------------|------------------|------|------------------|-----------------|-----------------|------------------|-----------------|------------------|----|
| 1  | 161.0379         | 81.0226         |                  |                  |                  |                  | C    |                  |                 |                 |                  |                 |                  | 13 |
| 2  | <b>274.1220</b>  | 137.5646        |                  |                  |                  |                  | I    | 1369.6304        | 685.3188        | 1352.6039       | 676.8056         | 1351.6198       | 676.3136         | 12 |
| 3  | <b>403.1646</b>  | 202.0859        | 386.1380         | 193.5727         |                  |                  | Q    | <b>1256.5463</b> | <b>628.7768</b> | 1239.5198       | <b>620.2635</b>  | 1238.5358       | <b>619.7715</b>  | 11 |
| 4  | <b>474.2017</b>  | 237.6045        | 457.1751         | 229.0912         |                  |                  | A    | <b>1127.5038</b> | 564.2555        | 1110.4772       | 555.7422         | 1109.4932       | 555.2502         | 10 |
| 5  | <b>589.2286</b>  | 295.1180        | 572.2021         | 286.6047         |                  |                  | N    | <b>1056.4666</b> | 528.7370        | 1039.4401       | 520.2237         | 1038.4561       | 519.7317         | 9  |
| 6  | <b>752.2920</b>  | 376.6496        | 735.2654         | 368.1363         |                  |                  | Y    | <b>941.4397</b>  | 471.2235        | 924.4131        | 462.7102         | 923.4291        | 462.2182         | 8  |
| 7  | <b>839.3240</b>  | 420.1656        | 822.2974         | 411.6524         | 821.3134         | 411.1604         | S    | 778.3764         | <b>389.6918</b> | 761.3498        | 381.1785         | 760.3658        | 380.6865         | 7  |
| 8  | <b>952.4081</b>  | 476.7077        | 935.3815         | 468.1944         | <b>934.3975</b>  | 467.7024         | L    | <b>691.3443</b>  | 346.1758        | 674.3178        | 337.6625         | 673.3338        | 337.1705         | 6  |
| 9  | <b>1083.4485</b> | 542.2279        | 1066.4220        | 533.7146         | <b>1065.4380</b> | 533.2226         | M    | <b>578.2603</b>  | 289.6338        | <b>561.2337</b> | 281.1205         | 560.2497        | 280.6285         | 5  |
| 10 | <b>1212.4911</b> | 606.7492        | 1195.4646        | 598.2359         | 1194.4806        | 597.7439         | E    | <b>447.2198</b>  | 224.1135        | 430.1932        | 215.6003         | <b>429.2092</b> | 215.1082         | 4  |
| 11 | <b>1326.5341</b> | 663.7707        | 1309.5075        | 655.2574         | 1308.5235        | 654.7654         | N    | <b>318.1772</b>  | 159.5922        | <b>301.1506</b> | 151.0790         |                 |                  | 3  |
| 12 | <b>1383.5555</b> | 692.2814        | <b>1366.5290</b> | 683.7681         | 1365.5450        | 683.2761         | G    | 204.1343         | 102.5708        | 187.1077        | 94.0575          |                 |                  | 2  |
| 13 |                  |                 |                  |                  |                  |                  | K    | 147.1128         | 74.0600         | 130.0863        | 65.5468          |                 |                  | 1  |

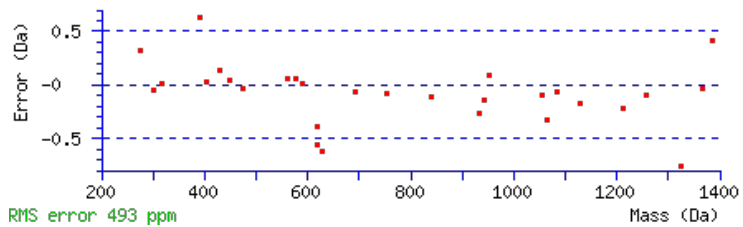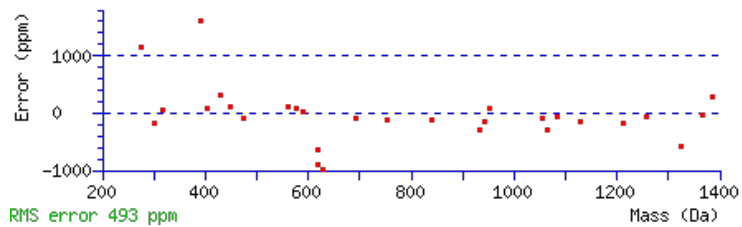

NCBI **BLAST** search of [CIQANYSLMENGK](#)

(Parameters: blastp, nr protein database, expect=20000, no filter, PAM30)

Other BLAST [web gateways](#)

**All matches to this query**

| Score | Mr(calc)  | Delta   | Sequence                      | Site Analysis            |
|-------|-----------|---------|-------------------------------|--------------------------|
| 50.7  | 1528.6537 | 0.0037  | <a href="#">CIQANYSLMENGK</a> | Deamidated Q3, N5 99.95% |
| 15.8  | 1528.6537 | 0.0037  | <a href="#">CIQANYSLMENGK</a> | Deamidated Q3, N11 0.03% |
| 11.8  | 1528.6537 | 0.0037  | <a href="#">CIQANYSLMENGK</a> | Deamidated N5, N11 0.01% |
| 8.2   | 1528.6650 | -0.0076 | <a href="#">FELGDGQNMCSKK</a> |                          |

Mascot: <http://www.matrixscience.com/>

# MASCOT SCIENCE Mascot Search Results

## Peptide View

MS/MS Fragmentation of **CIQANYSLMENGKIK**

Found in **C9JF17** in **con\_Xuniprot\_HUMAN3**, C9JF17\_HUMAN Apolipoprotein D (Fragment) OS=Homo sapiens GN=APOD PE=2 SV=1

Match to Query 9876: 1768.853772 from(590.625200,3+) intensity(28630.2461) rtinseconds(1107) scans(2604) index(26524)

Title: 111019\_Est\_MI\_YS\_G\_09Spectrum2237\_scans\_2604

Data file C:\mascot\20140703\_Tmgf\_1D\CSV\_UseAnalysis\MasterCSV\All\_Glyco\mgf\ptm\UC18ERLIC\_PTM\_35D.mgf

Click mouse within plot area to zoom in by factor of two about that point

Or, to Da

Label all possible matches Label matches used for scoring

Show Y-axis

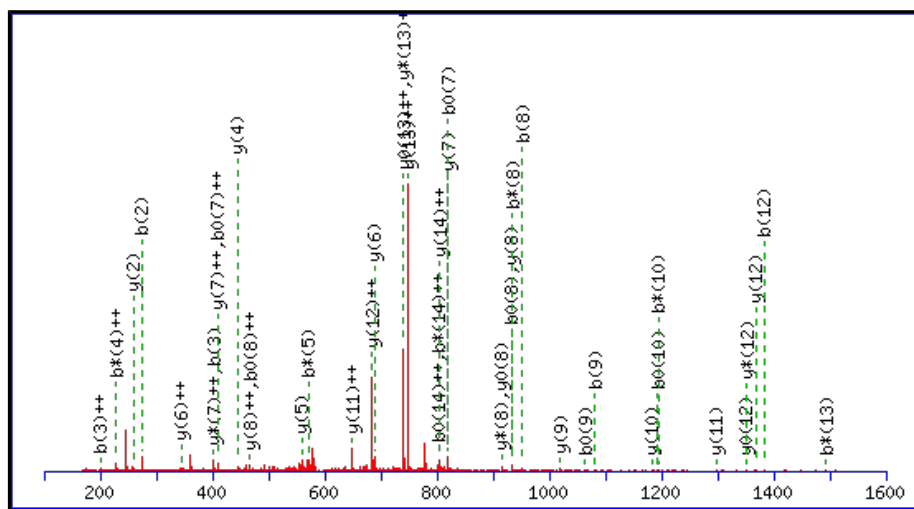

Monoisotopic mass of neutral peptide Mr(calc): 1768.8487

Fixed modifications: Carbamidomethyl (C) (apply to specified residues or termini only)

Variable modifications: N5 : Deamidated (NQ)

Ions Score: 46 Expect: 0.0063

Matches : 43/142 fragment ions using 81 most intense peaks ([help](#))

| #  | b                | b <sup>++</sup> | b <sup>*</sup>   | b <sup>*++</sup> | b <sup>0</sup>   | b <sup>0++</sup> | Seq. | y                | y <sup>++</sup> | y <sup>*</sup>   | y <sup>*++</sup> | y <sup>0</sup>   | y <sup>0++</sup> | #  |
|----|------------------|-----------------|------------------|------------------|------------------|------------------|------|------------------|-----------------|------------------|------------------|------------------|------------------|----|
| 1  | 161.0379         | 81.0226         |                  |                  |                  |                  | C    |                  |                 |                  |                  |                  |                  | 15 |
| 2  | <b>274.1220</b>  | 137.5646        |                  |                  |                  |                  | I    | 1609.8254        | <b>805.4163</b> | 1592.7989        | 796.9031         | 1591.8149        | 796.4111         | 14 |
| 3  | <b>402.1806</b>  | <b>201.5939</b> | 385.1540         | 193.0806         |                  |                  | Q    | 1496.7414        | <b>748.8743</b> | 1479.7148        | <b>740.3610</b>  | 1478.7308        | <b>739.8690</b>  | 13 |
| 4  | 473.2177         | 237.1125        | 456.1911         | <b>228.5992</b>  |                  |                  | A    | <b>1368.6828</b> | <b>684.8450</b> | <b>1351.6562</b> | 676.3318         | <b>1350.6722</b> | 675.8397         | 12 |
| 5  | 588.2446         | 294.6260        | <b>571.2181</b>  | 286.1127         |                  |                  | N    | <b>1297.6457</b> | <b>649.3265</b> | 1280.6191        | 640.8132         | 1279.6351        | 640.3212         | 11 |
| 6  | 751.3080         | 376.1576        | 734.2814         | 367.6443         |                  |                  | Y    | <b>1182.6187</b> | 591.8130        | 1165.5922        | 583.2997         | 1164.6082        | 582.8077         | 10 |
| 7  | 838.3400         | 419.6736        | 821.3134         | 411.1604         | <b>820.3294</b>  | <b>410.6683</b>  | S    | <b>1019.5554</b> | 510.2813        | 1002.5288        | 501.7681         | 1001.5448        | 501.2761         | 9  |
| 8  | <b>951.4240</b>  | 476.2157        | <b>934.3975</b>  | 467.7024         | <b>933.4135</b>  | <b>467.2104</b>  | L    | <b>932.5234</b>  | <b>466.7653</b> | <b>915.4968</b>  | 458.2520         | <b>914.5128</b>  | 457.7600         | 8  |
| 9  | <b>1082.4645</b> | 541.7359        | 1065.4380        | 533.2226         | <b>1064.4540</b> | 532.7306         | M    | <b>819.4393</b>  | <b>410.2233</b> | 802.4128         | <b>401.7100</b>  | 801.4287         | 401.2180         | 7  |
| 10 | 1211.5071        | 606.2572        | <b>1194.4806</b> | 597.7439         | <b>1193.4966</b> | 597.2519         | E    | <b>688.3988</b>  | <b>344.7030</b> | 671.3723         | 336.1898         | 670.3882         | 335.6978         | 6  |
| 11 | 1325.5501        | 663.2787        | 1308.5235        | 654.7654         | 1307.5395        | 654.2734         | N    | <b>559.3562</b>  | 280.1817        | 542.3297         | 271.6685         |                  |                  | 5  |
| 12 | <b>1382.5715</b> | 691.7894        | 1365.5450        | 683.2761         | 1364.5609        | 682.7841         | G    | <b>445.3133</b>  | 223.1603        | 428.2867         | 214.6470         |                  |                  | 4  |
| 13 | 1510.6665        | 755.8369        | <b>1493.6399</b> | 747.3236         | 1492.6559        | 746.8316         | K    | 388.2918         | 194.6496        | 371.2653         | 186.1363         |                  |                  | 3  |
| 14 | 1623.7505        | 812.3789        | 1606.7240        | <b>803.8656</b>  | 1605.7400        | <b>803.3736</b>  | I    | <b>260.1969</b>  | 130.6021        | 243.1703         | 122.0888         |                  |                  | 2  |
| 15 |                  |                 |                  |                  |                  |                  | K    | 147.1128         | 74.0600         | 130.0863         | 65.5468          |                  |                  | 1  |

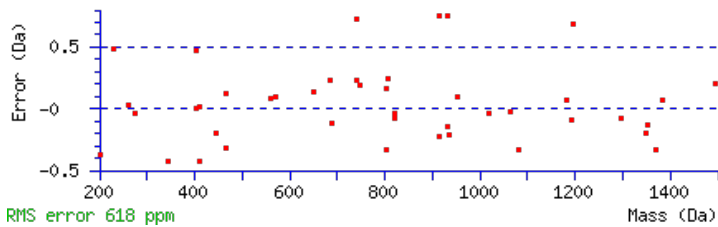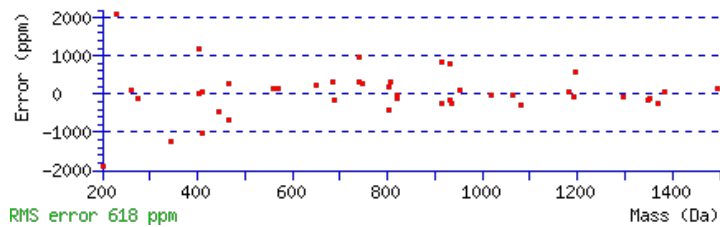

NCBI BLAST search of [CIQANYSLMENGKIK](#)

(Parameters: blastp, nr protein database, expect=20000, no filter, PAM30)

Other BLAST [web gateways](#)

**All matches to this query**

| Score | Mr(calc)  | Delta  | Sequence                            | Site Analysis        |
|-------|-----------|--------|-------------------------------------|----------------------|
| 45.7  | 1768.8487 | 0.0050 | <a href="#">CIQANYSLMENGKIK</a>     | Deamidated N5 69.01% |
| 42.0  | 1768.8487 | 0.0050 | <a href="#">CIQANYSLMENGKIK</a>     | Deamidated Q3 29.44% |
| 29.2  | 1768.8487 | 0.0050 | <a href="#">CIQANYSLMENGKIK</a>     | Deamidated N11 1.55% |
| 9.6   | 1767.8421 | 1.0117 | <a href="#">NRLSLNDLSSSSTMAR</a>    |                      |
| 8.4   | 1767.8421 | 1.0117 | <a href="#">NRLSLNDLSSSSTMAR</a>    |                      |
| 8.0   | 1767.8508 | 1.0029 | <a href="#">LCQAMEDQALRSRR</a>      |                      |
| 5.0   | 1768.8454 | 0.0084 | <a href="#">ICSQLPHIDTIENNP</a>     |                      |
| 4.9   | 1768.8487 | 0.0050 | <a href="#">DLLLAYMKGANLCR</a>      |                      |
| 4.9   | 1768.8487 | 0.0050 | <a href="#">NLLLAYMKGANLCR</a>      |                      |
| 4.6   | 1767.8500 | 1.0038 | <a href="#">EDAAEAPDGRAGGVAVGAR</a> |                      |

Mascot: <http://www.matrixscience.com/>

# MASCOT SCIENCE Mascot Search Results

## Peptide View

MS/MS Fragmentation of **CIQANYSLMENGKIK**

Found in **C9JF17** in **con\_Xuniprot\_HUMAN3**, C9JF17\_HUMAN Apolipoprotein D (Fragment) OS=Homo sapiens GN=APOD PE=2 SV=1

Match to Query 9877: 1769.837868 from(885.926210,2+) intensity(15394.2412) rtinseconds(1188) scans(2754) index(12487)

Title: 111019\_Est\_ISCardio\_NMI\_YS\_G\_9Spectrum2391\_scans\_\_2754

Data file C:\mascot\20140703\_Tmgf\_1D\CSV\_UseAnalysis\MasterCSV\All\_Glyco\mgf\ptm\UC18ERLIC\_PTM\_35D.mgf

Click mouse within plot area to zoom in by factor of two about that point

Or, to Da

Label all possible matches Label matches used for scoring

Show Y-axis

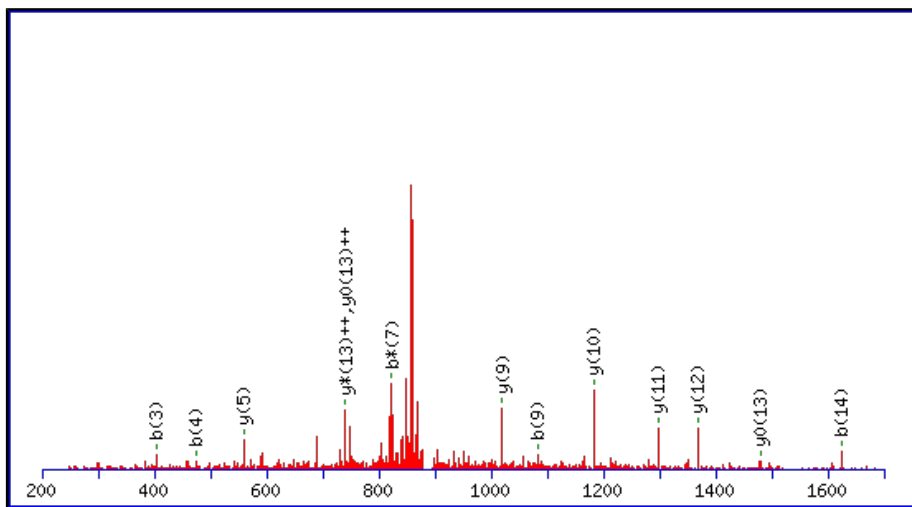

Monoisotopic mass of neutral peptide Mr(calc): 1769.8327

Fixed modifications: Carbamidomethyl (C) (apply to specified residues or termini only)

Variable modifications:

Q3 : Deamidated (NQ)

N5 : Deamidated (NQ)

Ions Score: 36 Expect: 0.057

Matches : 13/142 fragment ions using 15 most intense peaks ([help](#))

| #  | b                | b <sup>++</sup> | b <sup>*</sup>  | b <sup>*++</sup> | b <sup>0</sup> | b <sup>0++</sup> | Seq. | y                | y <sup>++</sup> | y <sup>*</sup> | y <sup>*++</sup> | y <sup>0</sup>   | y <sup>0++</sup> | #  |
|----|------------------|-----------------|-----------------|------------------|----------------|------------------|------|------------------|-----------------|----------------|------------------|------------------|------------------|----|
| 1  | 161.0379         | 81.0226         |                 |                  |                |                  | C    |                  |                 |                |                  |                  |                  | 15 |
| 2  | 274.1220         | 137.5646        |                 |                  |                |                  | I    | 1610.8094        | 805.9084        | 1593.7829      | 797.3951         | 1592.7989        | 796.9031         | 14 |
| 3  | <b>403.1646</b>  | 202.0859        | 386.1380        | 193.5727         |                |                  | Q    | 1497.7254        | 749.3663        | 1480.6988      | <b>740.8530</b>  | <b>1479.7148</b> | <b>740.3610</b>  | 13 |
| 4  | <b>474.2017</b>  | 237.6045        | 457.1751        | 229.0912         |                |                  | A    | <b>1368.6828</b> | 684.8450        | 1351.6562      | 676.3318         | 1350.6722        | 675.8397         | 12 |
| 5  | 589.2286         | 295.1180        | 572.2021        | 286.6047         |                |                  | N    | <b>1297.6457</b> | 649.3265        | 1280.6191      | 640.8132         | 1279.6351        | 640.3212         | 11 |
| 6  | 752.2920         | 376.6496        | 735.2654        | 368.1363         |                |                  | Y    | <b>1182.6187</b> | 591.8130        | 1165.5922      | 583.2997         | 1164.6082        | 582.8077         | 10 |
| 7  | 839.3240         | 420.1656        | <b>822.2974</b> | 411.6524         | 821.3134       | 411.1604         | S    | <b>1019.5554</b> | 510.2813        | 1002.5288      | 501.7681         | 1001.5448        | 501.2761         | 9  |
| 8  | 952.4081         | 476.7077        | 935.3815        | 468.1944         | 934.3975       | 467.7024         | L    | 932.5234         | 466.7653        | 915.4968       | 458.2520         | 914.5128         | 457.7600         | 8  |
| 9  | <b>1083.4485</b> | 542.2279        | 1066.4220       | 533.7146         | 1065.4380      | 533.2226         | M    | 819.4393         | 410.2233        | 802.4128       | 401.7100         | 801.4287         | 401.2180         | 7  |
| 10 | 1212.4911        | 606.7492        | 1195.4646       | 598.2359         | 1194.4806      | 597.7439         | E    | 688.3988         | 344.7030        | 671.3723       | 336.1898         | 670.3882         | 335.6978         | 6  |
| 11 | 1326.5341        | 663.7707        | 1309.5075       | 655.2574         | 1308.5235      | 654.7654         | N    | <b>559.3562</b>  | 280.1817        | 542.3297       | 271.6685         |                  |                  | 5  |
| 12 | 1383.5555        | 692.2814        | 1366.5290       | 683.7681         | 1365.5450      | 683.2761         | G    | 445.3133         | 223.1603        | 428.2867       | 214.6470         |                  |                  | 4  |
| 13 | 1511.6505        | 756.3289        | 1494.6239       | 747.8156         | 1493.6399      | 747.3236         | K    | 388.2918         | 194.6496        | 371.2653       | 186.1363         |                  |                  | 3  |
| 14 | <b>1624.7346</b> | 812.8709        | 1607.7080       | 804.3576         | 1606.7240      | 803.8656         | I    | 260.1969         | 130.6021        | 243.1703       | 122.0888         |                  |                  | 2  |
| 15 |                  |                 |                 |                  |                |                  | K    | 147.1128         | 74.0600         | 130.0863       | 65.5468          |                  |                  | 1  |

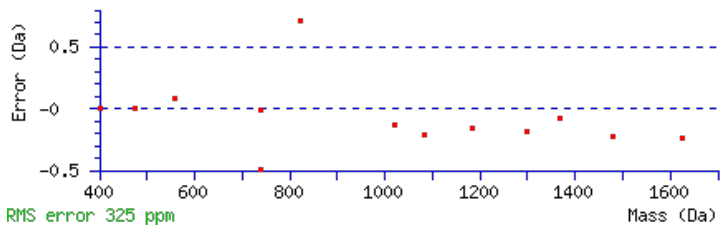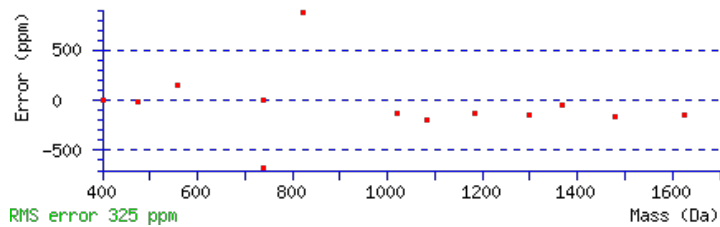

NCBI BLAST search of [CIQANYSLMENGKIK](#)

(Parameters: blastp, nr protein database, expect=20000, no filter, PAM30)

Other BLAST [web gateways](#)

**All matches to this query**

| Score | Mr(calc)  | Delta   | Sequence                         |
|-------|-----------|---------|----------------------------------|
| 35.6  | 1769.8327 | 0.0051  | <a href="#">CIQANYSLMENGKIK</a>  |
| 25.6  | 1769.8327 | 0.0051  | <a href="#">CIQANYSLMENGKIK</a>  |
| 24.9  | 1769.8327 | 0.0051  | <a href="#">CIQANYSLMENGKIK</a>  |
| 5.8   | 1769.8294 | 0.0084  | <a href="#">AVRGEFQMVIYDPDNK</a> |
| 5.5   | 1768.8375 | 1.0004  | <a href="#">AEKSFQMMQVQAEIK</a>  |
| 5.3   | 1769.8328 | 0.0051  | <a href="#">SMLNDKELMWSKEK</a>   |
| 3.5   | 1769.8407 | -0.0028 | <a href="#">VOFANQSFQELANMK</a>  |
| 3.3   | 1769.8333 | 0.0046  | <a href="#">AQQQDRPLQDWQEK</a>   |
| 2.1   | 1769.8361 | 0.0017  | <a href="#">LQSACKMSMEISKQK</a>  |
| 1.9   | 1768.8335 | 1.0044  | <a href="#">MDMDTQSGQTSLAKKK</a> |

Mascot: <http://www.matrixscience.com/>



# MASCOT SCIENCE Mascot Search Results

## Peptide View

MS/MS Fragmentation of **AALAAFNAQNGSNFQLEEISR**

Found in **C9JV77** in **con\_Xuniprot\_HUMAN3**, C9JV77\_HUMAN Alpha-2-HS-glycoprotein OS=Homo sapiens GN=AHSG PE=2 SV=1

Match to Query 20537: 2365.138288 from(1183.576420,2+) intensity(16121.7236) rtinseconds(1856) scans(4058) index(28908)

Title: 111019\_Est\_ML\_YS\_G\_15Spectrum3497\_scans\_\_4058

Data file C:\mascot\20140703\_Tmgf\_1D\CSV\_UseAnalysis\MasterCSV\All\_Glyco\mgf\ptm\UC18ERLIC\_PTM\_35D.mgf

Click mouse within plot area to zoom in by factor of two about that point

Or,  to  Da

Label all possible matches  Label matches used for scoring

Show Y-axis

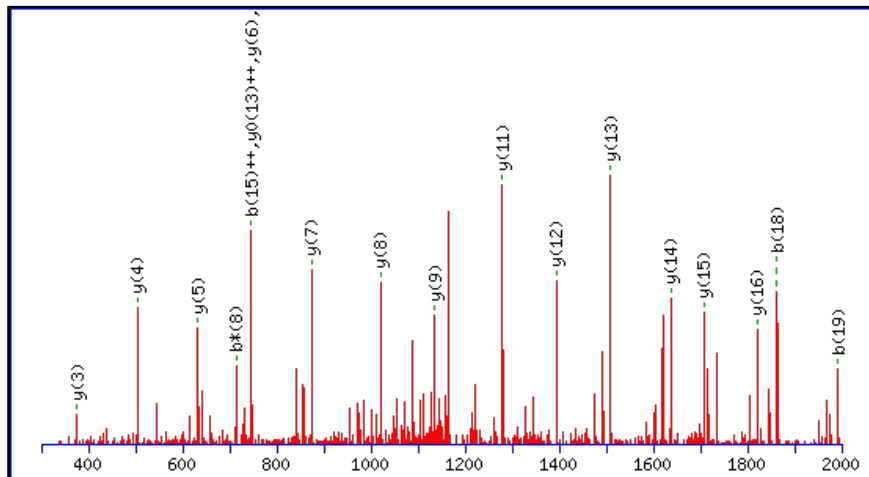

Monoisotopic mass of neutral peptide Mr(calc): 2365.1298

Fixed modifications: Carbamidomethyl (C) (apply to specified residues or termini only)

Variable modifications:

N11 : Deamidated (NQ)

Ions Score: 135 Expect: 7.9e-012

Matches : 19/214 fragment ions using 17 most intense peaks ([help](#))

| #  | b                | b <sup>++</sup> | b*              | b <sup>*++</sup> | b <sup>0</sup> | b <sup>0++</sup> | Seq. | y                | y <sup>++</sup> | y*        | y <sup>*++</sup> | y <sup>0</sup> | y <sup>0++</sup> | #  |
|----|------------------|-----------------|-----------------|------------------|----------------|------------------|------|------------------|-----------------|-----------|------------------|----------------|------------------|----|
| 1  | 72.0444          | 36.5258         |                 |                  |                |                  | A    |                  |                 |           |                  |                |                  | 22 |
| 2  | 143.0815         | 72.0444         |                 |                  |                |                  | A    | 2295.1000        | 1148.0536       | 2278.0735 | 1139.5404        | 2277.0894      | 1139.0484        | 21 |
| 3  | 256.1656         | 128.5864        |                 |                  |                |                  | L    | 2224.0629        | 1112.5351       | 2207.0364 | 1104.0218        | 2206.0523      | 1103.5298        | 20 |
| 4  | 327.2027         | 164.1050        |                 |                  |                |                  | A    | 2110.9788        | 1055.9931       | 2093.9523 | 1047.4798        | 2092.9683      | 1046.9878        | 19 |
| 5  | 398.2398         | 199.6235        |                 |                  |                |                  | A    | 2039.9417        | 1020.4745       | 2022.9152 | 1011.9612        | 2021.9312      | 1011.4692        | 18 |
| 6  | 545.3082         | 273.1577        |                 |                  |                |                  | F    | 1968.9046        | 984.9559        | 1951.8781 | 976.4427         | 1950.8940      | 975.9507         | 17 |
| 7  | 659.3511         | 330.1792        | 642.3246        | 321.6659         |                |                  | N    | <b>1821.8362</b> | 911.4217        | 1804.8096 | 902.9085         | 1803.8256      | 902.4165         | 16 |
| 8  | 730.3883         | 365.6978        | <b>713.3617</b> | 357.1845         |                |                  | A    | <b>1707.7933</b> | 854.4003        | 1690.7667 | 845.8870         | 1689.7827      | 845.3950         | 15 |
| 9  | 858.4468         | 429.7271        | 841.4203        | 421.2138         |                |                  | Q    | <b>1636.7562</b> | 818.8817        | 1619.7296 | 810.3684         | 1618.7456      | 809.8764         | 14 |
| 10 | 972.4898         | 486.7485        | 955.4632        | 478.2352         |                |                  | N    | <b>1508.6976</b> | 754.8524        | 1491.6710 | <b>746.3392</b>  | 1490.6870      | <b>745.8471</b>  | 13 |
| 11 | 1087.5167        | 544.2620        | 1070.4902       | 535.7487         |                |                  | N    | <b>1394.6546</b> | 697.8310        | 1377.6281 | 689.3177         | 1376.6441      | 688.8257         | 12 |
| 12 | 1144.5382        | 572.7727        | 1127.5116       | 564.2594         |                |                  | G    | <b>1279.6277</b> | 640.3175        | 1262.6012 | 631.8042         | 1261.6171      | 631.3122         | 11 |
| 13 | 1231.5702        | 616.2887        | 1214.5436       | 607.7755         | 1213.5596      | 607.2835         | S    | 1222.6062        | 611.8068        | 1205.5797 | 603.2935         | 1204.5957      | 602.8015         | 10 |
| 14 | 1345.6131        | 673.3102        | 1328.5866       | 664.7969         | 1327.6026      | 664.3049         | N    | <b>1135.5742</b> | 568.2907        | 1118.5477 | 559.7775         | 1117.5636      | 559.2855         | 9  |
| 15 | 1492.6815        | <b>746.8444</b> | 1475.6550       | 738.3311         | 1474.6710      | 737.8391         | F    | <b>1021.5313</b> | 511.2693        | 1004.5047 | 502.7560         | 1003.5207      | 502.2640         | 8  |
| 16 | 1620.7401        | 810.8737        | 1603.7136       | 802.3604         | 1602.7295      | 801.8684         | Q    | <b>874.4629</b>  | 437.7351        | 857.4363  | 429.2218         | 856.4523       | 428.7298         | 7  |
| 17 | 1733.8242        | 867.4157        | 1716.7976       | 858.9025         | 1715.8136      | 858.4104         | L    | <b>746.4043</b>  | 373.7058        | 729.3777  | 365.1925         | 728.3937       | 364.7005         | 6  |
| 18 | <b>1862.8668</b> | 931.9370        | 1845.8402       | 923.4237         | 1844.8562      | 922.9317         | E    | <b>633.3202</b>  | 317.1638        | 616.2937  | 308.6505         | 615.3097       | 308.1585         | 5  |
| 19 | <b>1991.9094</b> | 996.4583        | 1974.8828       | 987.9450         | 1973.8988      | 987.4530         | E    | <b>504.2776</b>  | 252.6425        | 487.2511  | 244.1292         | 486.2671       | 243.6372         | 4  |
| 20 | 2104.9934        | 1053.0003       | 2087.9669       | 1044.4871        | 2086.9829      | 1043.9951        | I    | <b>375.2350</b>  | 188.1212        | 358.2085  | 179.6079         | 357.2245       | 179.1159         | 3  |
| 21 | 2192.0255        | 1096.5164       | 2174.9989       | 1088.0031        | 2174.0149      | 1087.5111        | S    | 262.1510         | 131.5791        | 245.1244  | 123.0659         | 244.1404       | 122.5738         | 2  |
| 22 |                  |                 |                 |                  |                |                  | R    | 175.1190         | 88.0631         | 158.0924  | 79.5498          |                |                  | 1  |

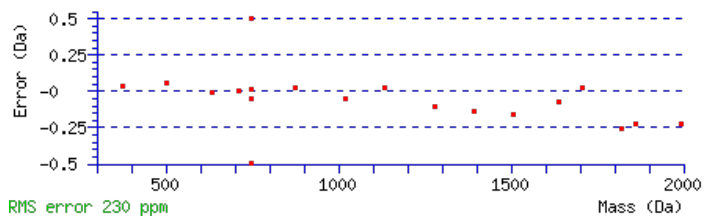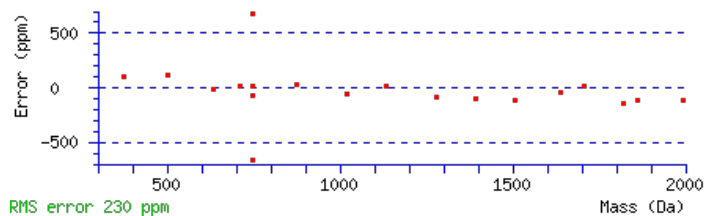

NCBI BLAST search of [AALAAFNAQNNGSNFQLEEISR](#)

(Parameters: blastp, nr protein database, expect=20000, no filter, PAM30)

Other BLAST [web gateways](#)

All matches to this query

| Score | Mr(calc)  | Delta   | Sequence                               | Site Analysis         |
|-------|-----------|---------|----------------------------------------|-----------------------|
| 135.0 | 2365.1298 | 0.0085  | <a href="#">AALAAFNAQNNGSNFQLEEISR</a> | Deamidated N11 99.08% |
| 114.5 | 2365.1298 | 0.0085  | <a href="#">AALAAFNAQNNGSNFQLEEISR</a> | Deamidated N10 0.87%  |
| 100.3 | 2365.1298 | 0.0085  | <a href="#">AALAAFNAQNNGSNFQLEEISR</a> | Deamidated N14 0.03%  |
| 96.0  | 2365.1298 | 0.0085  | <a href="#">AALAAFNAQNNGSNFQLEEISR</a> | Deamidated Q9 0.01%   |
| 85.8  | 2365.1298 | 0.0085  | <a href="#">AALAAFNAQNNGSNFQLEEISR</a> | Deamidated Q16 0.00%  |
| 64.2  | 2364.1458 | 0.9925  | <a href="#">AALAAFNAQNNGSNFQLEEISR</a> |                       |
| 60.5  | 2365.1298 | 0.0085  | <a href="#">AALAAFNAQNNGSNFQLEEISR</a> | Deamidated N7 0.00%   |
| 11.4  | 2365.1372 | 0.0011  | <a href="#">ELEEFKLNLEDTKMNGHLR</a>    |                       |
| 9.0   | 2365.1397 | -0.0014 | <a href="#">DSIQQSFSKEAKAQAALQAQQR</a> |                       |
| 8.2   | 2365.1424 | -0.0041 | <a href="#">AAWDSQQANPHHLRAHLAADR</a>  |                       |

Mascot: <http://www.matrixscience.com/>

# MATRIX SCIENCE Mascot Search Results

## Peptide View

MS/MS Fragmentation of **KVCQDCPLLAPLNDTR**

Found in **C9JV77** in **con\_Xuniprot\_HUMAN3**, C9JV77\_HUMAN Alpha-2-HS-glycoprotein OS=Homo sapiens GN=AHSG PE=2 SV=1

Match to Query 11418: 1900.907868 from(951.461210,2+) intensity(65483.2500) rtinseconds(1462) scans(3571) index(25308)

Title: 111019\_Est\_MI\_YS\_G\_07Spectrum3026\_scans\_\_3571

Data file C:\\mascot\\20140703\_Tmgf\_1D\\CSV\_UseAnalysis\\MasterCSV\\All\_Glyco\\mgf\\ptm\\UC18ERLIC\_PTM\_35D.mgf

Click mouse within plot area to zoom in by factor of two about that point

Or, to Da

Label all possible matches Label matches used for scoring

Show Y-axis

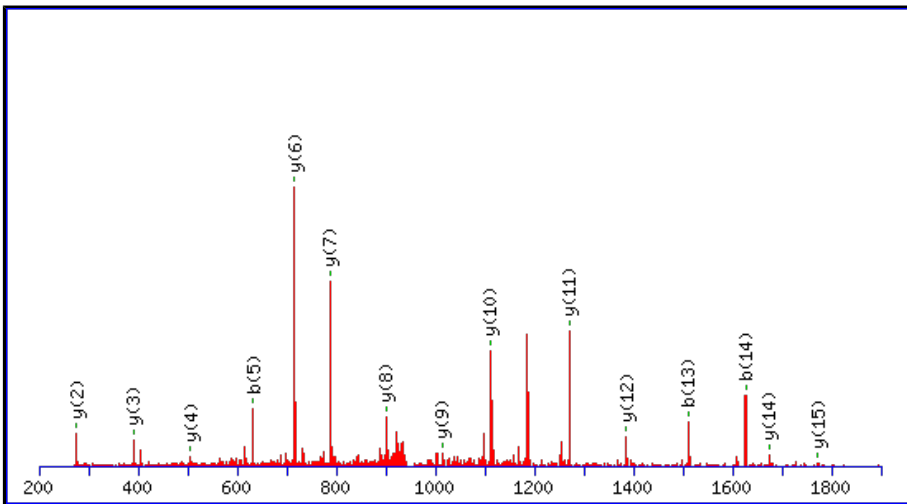

Monoisotopic mass of neutral peptide Mr(calc): 1900.9023

Fixed modifications: Carbamidomethyl (C) (apply to specified residues or termini only)

Variable modifications:

Q4 : Deamidated (NQ)

N13 : Deamidated (NQ)

Ions Score: 116 Expect: 5.2e-010

Matches : 15/170 fragment ions using 17 most intense peaks ([help](#))

| #  | b                | b <sup>++</sup> | b*        | b <sup>***</sup> | b <sup>0</sup> | b <sup>0++</sup> | Seq.     | y                | y <sup>++</sup> | y*        | y <sup>***</sup> | y <sup>0</sup> | y <sup>0++</sup> | #         |
|----|------------------|-----------------|-----------|------------------|----------------|------------------|----------|------------------|-----------------|-----------|------------------|----------------|------------------|-----------|
| 1  | 129.1022         | 65.0548         | 112.0757  | 56.5415          |                |                  | <b>K</b> |                  |                 |           |                  |                |                  | <b>16</b> |
| 2  | 228.1707         | 114.5890        | 211.1441  | 106.0757         |                |                  | <b>V</b> | <b>1773.8146</b> | 887.4109        | 1756.7881 | 878.8977         | 1755.8040      | 878.4057         | <b>15</b> |
| 3  | 388.2013         | 194.6043        | 371.1748  | 186.0910         |                |                  | <b>C</b> | <b>1674.7462</b> | 837.8767        | 1657.7196 | 829.3635         | 1656.7356      | 828.8714         | <b>14</b> |
| 4  | 517.2439         | 259.1256        | 500.2173  | 250.6123         |                |                  | <b>Q</b> | 1514.7155        | 757.8614        | 1497.6890 | 749.3481         | 1496.7050      | 748.8561         | <b>13</b> |
| 5  | <b>632.2708</b>  | 316.6391        | 615.2443  | 308.1258         | 614.2603       | 307.6338         | <b>D</b> | <b>1385.6729</b> | 693.3401        | 1368.6464 | 684.8268         | 1367.6624      | 684.3348         | <b>12</b> |
| 6  | 792.3015         | 396.6544        | 775.2749  | 388.1411         | 774.2909       | 387.6491         | <b>C</b> | <b>1270.6460</b> | 635.8266        | 1253.6195 | 627.3134         | 1252.6354      | 626.8214         | <b>11</b> |
| 7  | 889.3543         | 445.1808        | 872.3277  | 436.6675         | 871.3437       | 436.1755         | <b>P</b> | <b>1110.6154</b> | 555.8113        | 1093.5888 | 547.2980         | 1092.6048      | 546.8060         | <b>10</b> |
| 8  | 1002.4383        | 501.7228        | 985.4118  | 493.2095         | 984.4278       | 492.7175         | <b>L</b> | <b>1013.5626</b> | 507.2849        | 996.5360  | 498.7717         | 995.5520       | 498.2796         | <b>9</b>  |
| 9  | 1115.5224        | 558.2648        | 1098.4958 | 549.7516         | 1097.5118      | 549.2595         | <b>L</b> | <b>900.4785</b>  | 450.7429        | 883.4520  | 442.2296         | 882.4680       | 441.7376         | <b>8</b>  |
| 10 | 1186.5595        | 593.7834        | 1169.5329 | 585.2701         | 1168.5489      | 584.7781         | <b>A</b> | <b>787.3945</b>  | 394.2009        | 770.3679  | 385.6876         | 769.3839       | 385.1956         | <b>7</b>  |
| 11 | 1283.6123        | 642.3098        | 1266.5857 | 633.7965         | 1265.6017      | 633.3045         | <b>P</b> | <b>716.3573</b>  | 358.6823        | 699.3308  | 350.1690         | 698.3468       | 349.6770         | <b>6</b>  |
| 12 | 1396.6963        | 698.8518        | 1379.6698 | 690.3385         | 1378.6858      | 689.8465         | <b>L</b> | 619.3046         | 310.1559        | 602.2780  | 301.6427         | 601.2940       | 301.1506         | <b>5</b>  |
| 13 | <b>1511.7233</b> | 756.3653        | 1494.6967 | 747.8520         | 1493.7127      | 747.3600         | <b>N</b> | <b>506.2205</b>  | 253.6139        | 489.1940  | 245.1006         | 488.2100       | 244.6086         | <b>4</b>  |
| 14 | <b>1626.7502</b> | 813.8787        | 1609.7237 | 805.3655         | 1608.7396      | 804.8735         | <b>D</b> | <b>391.1936</b>  | 196.1004        | 374.1670  | 187.5872         | 373.1830       | 187.0951         | <b>3</b>  |
| 15 | 1727.7979        | 864.4026        | 1710.7713 | 855.8893         | 1709.7873      | 855.3973         | <b>T</b> | <b>276.1666</b>  | 138.5870        | 259.1401  | 130.0737         | 258.1561       | 129.5817         | <b>2</b>  |
| 16 |                  |                 |           |                  |                |                  | <b>R</b> | 175.1190         | 88.0631         | 158.0924  | 79.5498          |                |                  | <b>1</b>  |

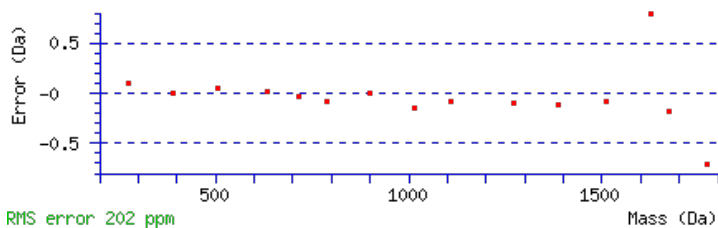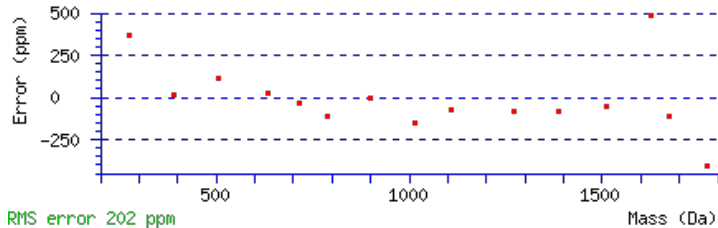

NCBI **BLAST** search of [KVCQDCPLLAPLNDTR](#)

(Parameters: blastp, nr protein database, expect=20000, no filter, PAM30)

Other BLAST [web gateways](#)

**All matches to this query**

| Score | Mr(calc)  | Delta   | Sequence                         |
|-------|-----------|---------|----------------------------------|
| 116.3 | 1900.9023 | 0.0056  | <a href="#">KVCQDCPLLAPLNDTR</a> |
| 10.2  | 1900.9014 | 0.0065  | <a href="#">EEQKQATPKQAEQEEK</a> |
| 8.3   | 1900.9014 | 0.0065  | <a href="#">EEQEAQKPTAQKQEEK</a> |
| 6.7   | 1900.9014 | 0.0065  | <a href="#">EEQEAQKPTAQKQEEK</a> |
| 6.4   | 1900.8989 | 0.0090  | <a href="#">KVTQEWMHVKDQDEK</a>  |
| 6.4   | 1900.8989 | 0.0090  | <a href="#">KVTQEWMHVKDQDEK</a>  |
| 5.0   | 1899.9135 | 0.9943  | <a href="#">VCELQLPDINLVNDQK</a> |
| 4.1   | 1899.9135 | 0.9943  | <a href="#">VCELQLPDINLVNDQK</a> |
| 3.2   | 1900.9126 | -0.0047 | <a href="#">ENEELKQRNGALDOOK</a> |
| 3.2   | 1900.9126 | -0.0047 | <a href="#">ENEELKQRNGALDQOK</a> |

Mascot: <http://www.matrixscience.com/>

# MASCOT SCIENCE Mascot Search Results

## Peptide View

MS/MS Fragmentation of **KVCQDCPLLAPLNDTR**

Found in **C9JV77** in **con\_Xuniprot\_HUMAN3**, C9JV77\_HUMAN Alpha-2-HS-glycoprotein OS=Homo sapiens GN=AHSG PE=2 SV=1

Match to Query 11313: 1899.922568 from(950.968560,2+) intensity(3829381.2500) rtinseconds(1326) scans(3204) index(9423)

Title: 111019\_Est\_ISCardio\_NMI\_YS\_G\_5Spectrum2724\_scans\_\_3204

Data file C:\\mascot\\20140703\_Tmgf\_1D\\CSV\_UseAnalysis\\MasterCSV\\All\_Glyco\\mgf\\ptm\\UC18ERLIC\_PTM\_35D.mgf

Click mouse within plot area to zoom in by factor of two about that point

Or, to Da

Label all possible matches Label matches used for scoring

Show Y-axis

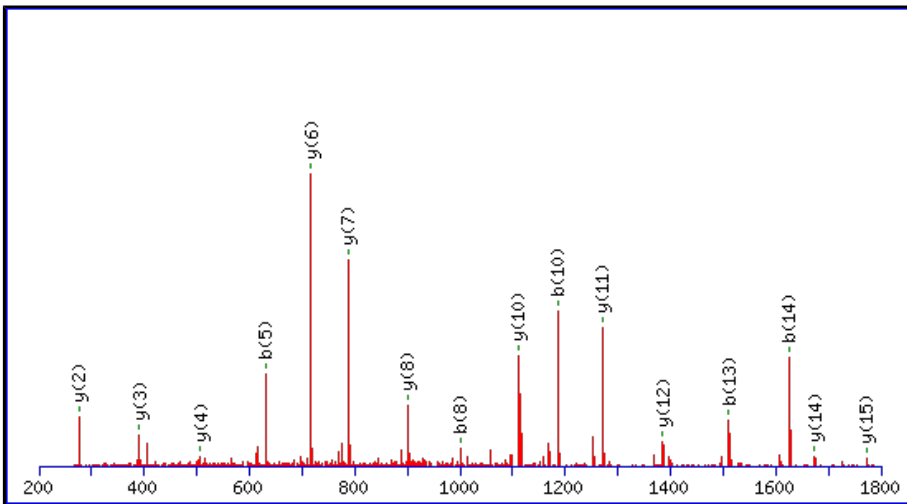

Monoisotopic mass of neutral peptide Mr(calc): 1899.9183

Fixed modifications: Carbamidomethyl (C) (apply to specified residues or termini only)

Variable modifications:

N13 : Deamidated (NQ)

Ions Score: 116 Expect: 5.8e-010

Matches : 16/170 fragment ions using 16 most intense peaks ([help](#))

| #  | b                | b <sup>++</sup> | b <sup>*</sup> | b <sup>*++</sup> | b <sup>0</sup> | b <sup>0++</sup> | Seq.     | y                | y <sup>++</sup> | y <sup>*</sup> | y <sup>*++</sup> | y <sup>0</sup> | y <sup>0++</sup> | #         |
|----|------------------|-----------------|----------------|------------------|----------------|------------------|----------|------------------|-----------------|----------------|------------------|----------------|------------------|-----------|
| 1  | 129.1022         | 65.0548         | 112.0757       | 56.5415          |                |                  | <b>K</b> |                  |                 |                |                  |                |                  | <b>16</b> |
| 2  | 228.1707         | 114.5890        | 211.1441       | 106.0757         |                |                  | <b>V</b> | <b>1772.8306</b> | 886.9189        | 1755.8040      | 878.4057         | 1754.8200      | 877.9136         | <b>15</b> |
| 3  | 388.2013         | 194.6043        | 371.1748       | 186.0910         |                |                  | <b>C</b> | <b>1673.7622</b> | 837.3847        | 1656.7356      | 828.8714         | 1655.7516      | 828.3794         | <b>14</b> |
| 4  | 516.2599         | 258.6336        | 499.2333       | 250.1203         |                |                  | <b>Q</b> | 1513.7315        | 757.3694        | 1496.7050      | 748.8561         | 1495.7210      | 748.3641         | <b>13</b> |
| 5  | <b>631.2868</b>  | 316.1470        | 614.2603       | 307.6338         | 613.2763       | 307.1418         | <b>D</b> | <b>1385.6729</b> | 693.3401        | 1368.6464      | 684.8268         | 1367.6624      | 684.3348         | <b>12</b> |
| 6  | 791.3175         | 396.1624        | 774.2909       | 387.6491         | 773.3069       | 387.1571         | <b>C</b> | <b>1270.6460</b> | 635.8266        | 1253.6195      | 627.3134         | 1252.6354      | 626.8214         | <b>11</b> |
| 7  | 888.3702         | 444.6888        | 871.3437       | 436.1755         | 870.3597       | 435.6835         | <b>P</b> | <b>1110.6154</b> | 555.8113        | 1093.5888      | 547.2980         | 1092.6048      | 546.8060         | <b>10</b> |
| 8  | <b>1001.4543</b> | 501.2308        | 984.4278       | 492.7175         | 983.4437       | 492.2255         | <b>L</b> | 1013.5626        | 507.2849        | 996.5360       | 498.7717         | 995.5520       | 498.2796         | <b>9</b>  |
| 9  | 1114.5384        | 557.7728        | 1097.5118      | 549.2595         | 1096.5278      | 548.7675         | <b>L</b> | <b>900.4785</b>  | 450.7429        | 883.4520       | 442.2296         | 882.4680       | 441.7376         | <b>8</b>  |
| 10 | <b>1185.5755</b> | 593.2914        | 1168.5489      | 584.7781         | 1167.5649      | 584.2861         | <b>A</b> | <b>787.3945</b>  | 394.2009        | 770.3679       | 385.6876         | 769.3839       | 385.1956         | <b>7</b>  |
| 11 | 1282.6282        | 641.8178        | 1265.6017      | 633.3045         | 1264.6177      | 632.8125         | <b>P</b> | <b>716.3573</b>  | 358.6823        | 699.3308       | 350.1690         | 698.3468       | 349.6770         | <b>6</b>  |
| 12 | 1395.7123        | 698.3598        | 1378.6858      | 689.8465         | 1377.7017      | 689.3545         | <b>L</b> | 619.3046         | 310.1559        | 602.2780       | 301.6427         | 601.2940       | 301.1506         | <b>5</b>  |
| 13 | <b>1510.7392</b> | 755.8733        | 1493.7127      | 747.3600         | 1492.7287      | 746.8680         | <b>N</b> | <b>506.2205</b>  | 253.6139        | 489.1940       | 245.1006         | 488.2100       | 244.6086         | <b>4</b>  |
| 14 | <b>1625.7662</b> | 813.3867        | 1608.7396      | 804.8735         | 1607.7556      | 804.3815         | <b>D</b> | <b>391.1936</b>  | 196.1004        | 374.1670       | 187.5872         | 373.1830       | 187.0951         | <b>3</b>  |
| 15 | 1726.8139        | 863.9106        | 1709.7873      | 855.3973         | 1708.8033      | 854.9053         | <b>T</b> | <b>276.1666</b>  | 138.5870        | 259.1401       | 130.0737         | 258.1561       | 129.5817         | <b>2</b>  |
| 16 |                  |                 |                |                  |                |                  | <b>R</b> | 175.1190         | 88.0631         | 158.0924       | 79.5498          |                |                  | <b>1</b>  |

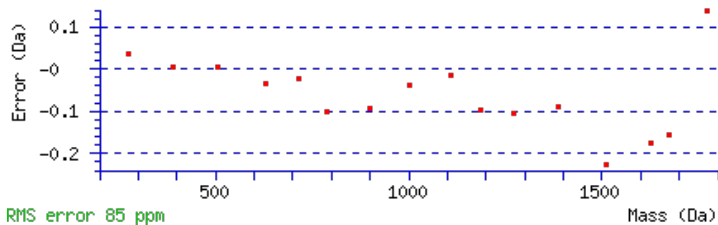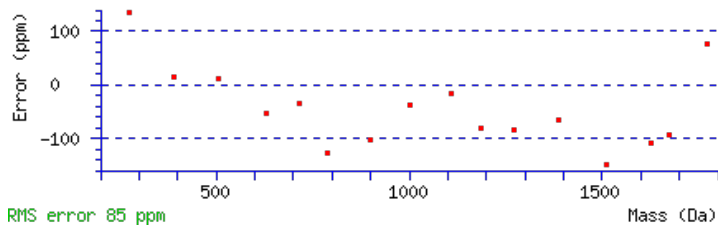

NCBI **BLAST** search of [KVCQDCPLLAPLNDTR](#)

(Parameters: blastp, nr protein database, expect=20000, no filter, PAM30)

Other BLAST [web gateways](#)

**All matches to this query**

| Score | Mr(calc)  | Delta   | Sequence                          | Site Analysis          |
|-------|-----------|---------|-----------------------------------|------------------------|
| 116.0 | 1899.9183 | 0.0043  | <a href="#">KVCQDCPLLAPLNDTR</a>  | Deamidated N13 100.00% |
| 18.6  | 1899.9183 | 0.0043  | <a href="#">KVCQDCPLLAPLNDTR</a>  | Deamidated Q4 0.00%    |
| 12.7  | 1899.9288 | -0.0062 | <a href="#">MIQKLPEWAADEPVEK</a>  |                        |
| 10.5  | 1898.9196 | 1.0029  | <a href="#">GYAVDDQFGCREILKK</a>  |                        |
| 9.3   | 1899.9135 | 0.0090  | <a href="#">VCELQLPDINLVNDQK</a>  |                        |
| 7.9   | 1899.9149 | 0.0077  | <a href="#">KVTQEWMHVKDQDEK</a>   |                        |
| 5.0   | 1899.9286 | -0.0060 | <a href="#">QQDLAGNRQKLEENEK</a>  |                        |
| 4.3   | 1899.9216 | 0.0009  | <a href="#">QMTLLDMAKGTQKMTR</a>  |                        |
| 4.1   | 1899.9313 | -0.0087 | <a href="#">TLNSNDPVQNVVQVLEK</a> |                        |
| 2.7   | 1899.9135 | 0.0090  | <a href="#">VCELQLPDINLVNDQK</a>  |                        |

Mascot: <http://www.matrixscience.com/>

# MASCOT SCIENCE Mascot Search Results

## Peptide View

MS/MS Fragmentation of **VCQDCPLLAPLNDR**

Found in **C9JV77** in **con\_Xuniprot\_HUMAN3**, C9JV77\_HUMAN Alpha-2-HS-glycoprotein OS=Homo sapiens GN=AHSG PE=2 SV=1

Match to Query 9931: 1771.828648 from(886.921600,2+) intensity(307122.3125) rtinseconds(1645) scans(3858) index(11804)

Title: 111019\_Est\_ISCardio\_NMI\_YS\_G\_8Spectrum3294\_scans\_\_3858

Data file C:\\mascot\\20140703\_Tmgf\_1D\\CSV\_UseAnalysis\\MasterCSV\\All\_Glyco\\mgf\\ptm\\UC18ERLIC\_PTM\_35D.mgf

Click mouse within plot area to zoom in by factor of two about that point

Or, to Da

Label all possible matches Label matches used for scoring

Show Y-axis

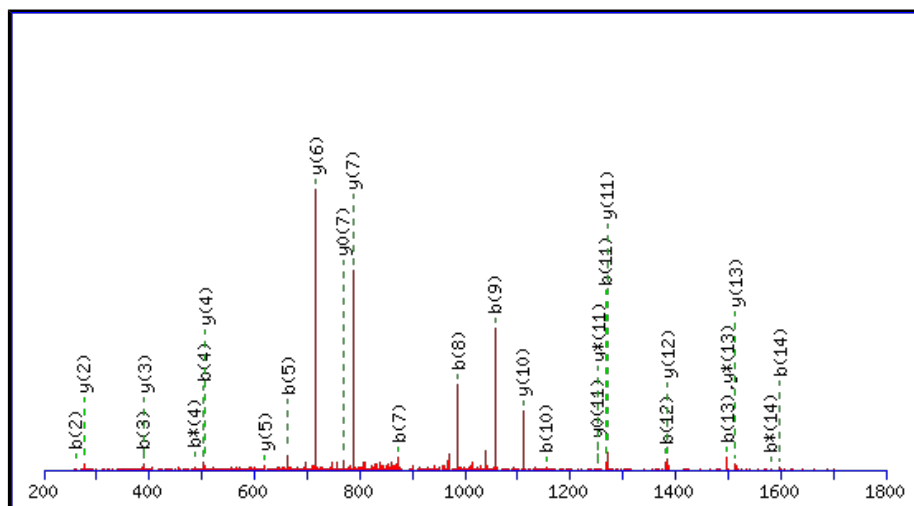

Monoisotopic mass of neutral peptide Mr(calc): 1771.8233

Fixed modifications: Carbamidomethyl (C) (apply to specified residues or termini only)

Variable modifications:

N12 : Deamidated (NQ)

Ions Score: 89 Expect: 2.1e-007

Matches : 28/156 fragment ions using 45 most intense peaks ([help](#))

| #  | b                | b <sup>++</sup> | b*               | b <sup>+++</sup> | b <sup>0</sup> | b <sup>0++</sup> | Seq. | y                | y <sup>++</sup> | y*               | y <sup>+++</sup> | y <sup>0</sup>   | y <sup>0++</sup> | #  |
|----|------------------|-----------------|------------------|------------------|----------------|------------------|------|------------------|-----------------|------------------|------------------|------------------|------------------|----|
| 1  | 100.0757         | 50.5415         |                  |                  |                |                  | V    |                  |                 |                  |                  |                  |                  | 15 |
| 2  | <b>260.1063</b>  | 130.5568        |                  |                  |                |                  | C    | 1673.7622        | 837.3847        | 1656.7356        | 828.8714         | 1655.7516        | 828.3794         | 14 |
| 3  | <b>388.1649</b>  | 194.5861        | 371.1384         | 186.0728         |                |                  | Q    | <b>1513.7315</b> | 757.3694        | <b>1496.7050</b> | 748.8561         | 1495.7210        | 748.3641         | 13 |
| 4  | <b>503.1919</b>  | 252.0996        | <b>486.1653</b>  | 243.5863         | 485.1813       | 243.0943         | D    | <b>1385.6729</b> | 693.3401        | 1368.6464        | 684.8268         | 1367.6624        | 684.3348         | 12 |
| 5  | <b>663.2225</b>  | 332.1149        | 646.1960         | 323.6016         | 645.2119       | 323.1096         | C    | <b>1270.6460</b> | 635.8266        | <b>1253.6195</b> | 627.3134         | <b>1252.6354</b> | 626.8214         | 11 |
| 6  | 760.2753         | 380.6413        | 743.2487         | 372.1280         | 742.2647       | 371.6360         | P    | <b>1110.6154</b> | 555.8113        | 1093.5888        | 547.2980         | 1092.6048        | 546.8060         | 10 |
| 7  | <b>873.3593</b>  | 437.1833        | 856.3328         | 428.6700         | 855.3488       | 428.1780         | L    | 1013.5626        | 507.2849        | 996.5360         | 498.7717         | 995.5520         | 498.2796         | 9  |
| 8  | <b>986.4434</b>  | 493.7253        | 969.4169         | 485.2121         | 968.4328       | 484.7201         | L    | 900.4785         | 450.7429        | 883.4520         | 442.2296         | 882.4680         | 441.7376         | 8  |
| 9  | <b>1057.4805</b> | 529.2439        | 1040.4540        | 520.7306         | 1039.4700      | 520.2386         | A    | <b>787.3945</b>  | 394.2009        | 770.3679         | 385.6876         | <b>769.3839</b>  | 385.1956         | 7  |
| 10 | <b>1154.5333</b> | 577.7703        | 1137.5067        | 569.2570         | 1136.5227      | 568.7650         | P    | <b>716.3573</b>  | 358.6823        | 699.3308         | 350.1690         | 698.3468         | 349.6770         | 6  |
| 11 | <b>1267.6173</b> | 634.3123        | 1250.5908        | 625.7990         | 1249.6068      | 625.3070         | L    | <b>619.3046</b>  | 310.1559        | 602.2780         | 301.6427         | 601.2940         | 301.1506         | 5  |
| 12 | <b>1382.6443</b> | 691.8258        | 1365.6177        | 683.3125         | 1364.6337      | 682.8205         | N    | <b>506.2205</b>  | 253.6139        | 489.1940         | 245.1006         | 488.2100         | 244.6086         | 4  |
| 13 | <b>1497.6712</b> | 749.3393        | 1480.6447        | 740.8260         | 1479.6607      | 740.3340         | D    | <b>391.1936</b>  | 196.1004        | 374.1670         | 187.5872         | 373.1830         | 187.0951         | 3  |
| 14 | <b>1598.7189</b> | 799.8631        | <b>1581.6924</b> | 791.3498         | 1580.7083      | 790.8578         | T    | <b>276.1666</b>  | 138.5870        | 259.1401         | 130.0737         | 258.1561         | 129.5817         | 2  |
| 15 |                  |                 |                  |                  |                |                  | R    | 175.1190         | 88.0631         | 158.0924         | 79.5498          |                  |                  | 1  |



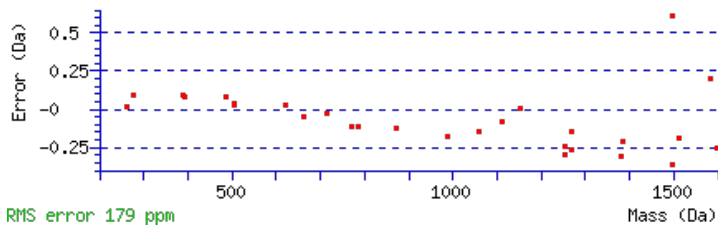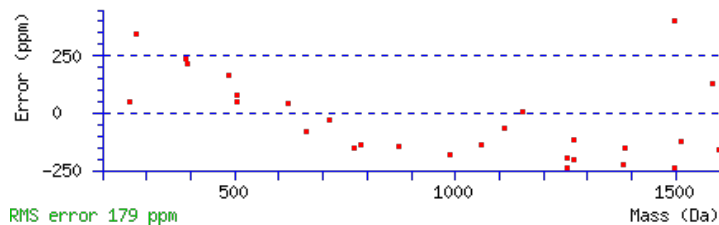

NCBI BLAST search of [VCQDCPLLAPLNDTR](#)

(Parameters: blastp, nr protein database, expect=20000, no filter, PAM30)

Other BLAST [web gateways](#)

**All matches to this query**

| Score | Mr(calc)  | Delta   | Sequence                            | Site Analysis          |
|-------|-----------|---------|-------------------------------------|------------------------|
| 89.5  | 1771.8233 | 0.0053  | <a href="#">VCQDCPLLAPLNDTR</a>     | Deamidated N12 100.00% |
| 22.2  | 1771.8233 | 0.0053  | <a href="#">VCQDCPLLAPLNDTR</a>     | Deamidated Q3 0.00%    |
| 9.0   | 1770.8314 | 0.9972  | <a href="#">CKSMEQGMSNLLTLK</a>     |                        |
| 7.7   | 1771.8264 | 0.0022  | <a href="#">EDWDEPKSADPKIK</a>      |                        |
| 7.0   | 1771.8224 | 0.0063  | <a href="#">EQQESLSGRTHELQK</a>     |                        |
| 6.0   | 1771.8271 | 0.0015  | <a href="#">NAAVMDQGPAGDRTVNR</a>   |                        |
| 4.5   | 1770.8319 | 0.9967  | <a href="#">GPGMREIGPVSGGGGGGQK</a> |                        |
| 4.0   | 1771.8336 | -0.0050 | <a href="#">GRNDSGEENVPLDLTR</a>    |                        |
| 3.6   | 1771.8336 | -0.0050 | <a href="#">GRNQQIARPSQEEK</a>      |                        |
| 3.4   | 1770.8247 | 1.0040  | <a href="#">RFDTVYDQMVQPQK</a>      |                        |

Mascot: <http://www.matrixscience.com/>

# MATRIX SCIENCE Mascot Search Results

## Peptide View

MS/MS Fragmentation of **VVHAAKAALAAFNAQNNGSNFQLEEISR**

Found in **C9JV77** in **con\_Xuniprot\_HUMAN3**, C9JV77\_HUMAN Alpha-2-HS-glycoprotein OS=Homo sapiens GN=AHSG PE=2 SV=1

Match to Query 27064: 2972.510292 from(991.844040,3+) intensity(20918.4844) rtinseconds(1607) scans(3923) index(23226)

Title: 111019\_Est\_MI\_YS\_G\_04Spectrum3363\_scans\_\_3923

Data file C:\mascot\20140703\_Tmgf\_1D\CSV\_UseAnalysis\MasterCSV\All\_Glyco\mgf\ptm\UC18ERLIC\_PTM\_35D.mgf

Click mouse within plot area to zoom in by factor of two about that point

Or, to Da

Label all possible matches Label matches used for scoring

Show Y-axis

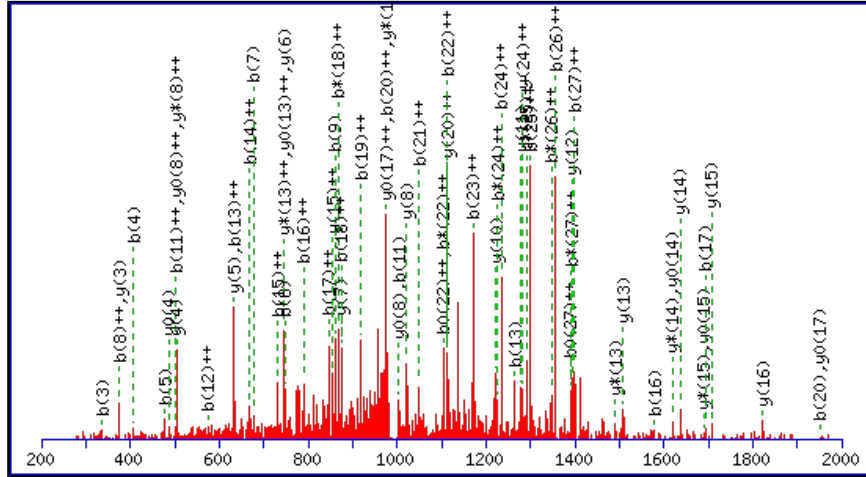

Monoisotopic mass of neutral peptide Mr(calc): 2970.4947

Fixed modifications: Carbamidomethyl (C) (apply to specified residues or termini only)

Variable modifications:

N17 : Deamidated (NQ)

Ions Score: 88 Expect: 3.9e-007

Matches : 67/276 fragment ions using 119 most intense peaks ([help](#))

| #  | b                | b <sup>++</sup>  | b <sup>*</sup> | b <sup>*++</sup> | b <sup>0</sup> | b <sup>0++</sup> | Seq. | y                | y <sup>++</sup>  | y <sup>*</sup>   | y <sup>*++</sup> | y <sup>0</sup>   | y <sup>0++</sup> | #  |
|----|------------------|------------------|----------------|------------------|----------------|------------------|------|------------------|------------------|------------------|------------------|------------------|------------------|----|
| 1  | 100.0757         | 50.5415          |                |                  |                |                  | V    |                  |                  |                  |                  |                  |                  | 28 |
| 2  | 199.1441         | 100.0757         |                |                  |                |                  | V    | 2872.4336        | 1436.7205        | 2855.4071        | 1428.2072        | 2854.4231        | 1427.7152        | 27 |
| 3  | <b>336.2030</b>  | 168.6051         |                |                  |                |                  | H    | 2773.3652        | 1387.1863        | 2756.3387        | 1378.6730        | 2755.3547        | 1378.1810        | 26 |
| 4  | <b>407.2401</b>  | 204.1237         |                |                  |                |                  | A    | 2636.3063        | 1318.6568        | 2619.2798        | 1310.1435        | 2618.2958        | 1309.6515        | 25 |
| 5  | <b>478.2772</b>  | 239.6423         |                |                  |                |                  | A    | 2565.2692        | <b>1283.1382</b> | 2548.2427        | 1274.6250        | 2547.2586        | 1274.1330        | 24 |
| 6  | 606.3722         | 303.6897         | 589.3457       | 295.1765         |                |                  | K    | 2494.2321        | 1247.6197        | 2477.2055        | 1239.1064        | 2476.2215        | 1238.6144        | 23 |
| 7  | <b>677.4093</b>  | 339.2083         | 660.3828       | 330.6950         |                |                  | A    | 2366.1371        | 1183.5722        | 2349.1106        | 1175.0589        | 2348.1266        | 1174.5669        | 22 |
| 8  | <b>748.4464</b>  | <b>374.7269</b>  | 731.4199       | 366.2136         |                |                  | A    | 2295.1000        | 1148.0536        | 2278.0735        | 1139.5404        | 2277.0894        | 1139.0484        | 21 |
| 9  | <b>861.5305</b>  | 431.2689         | 844.5039       | 422.7556         |                |                  | L    | 2224.0629        | <b>1112.5351</b> | 2207.0364        | 1104.0218        | 2206.0523        | 1103.5298        | 20 |
| 10 | 932.5676         | 466.7874         | 915.5411       | 458.2742         |                |                  | A    | 2110.9788        | 1055.9931        | 2093.9523        | 1047.4798        | 2092.9683        | 1046.9878        | 19 |
| 11 | <b>1003.6047</b> | <b>502.3060</b>  | 986.5782       | 493.7927         |                |                  | A    | 2039.9417        | 1020.4745        | 2022.9152        | 1011.9612        | 2021.9312        | 1011.4692        | 18 |
| 12 | 1150.6731        | <b>575.8402</b>  | 1133.6466      | 567.3269         |                |                  | F    | 1968.9046        | 984.9559         | 1951.8781        | <b>976.4427</b>  | <b>1950.8940</b> | <b>975.9507</b>  | 17 |
| 13 | <b>1264.7161</b> | <b>632.8617</b>  | 1247.6895      | 624.3484         |                |                  | N    | <b>1821.8362</b> | 911.4217         | 1804.8096        | 902.9085         | 1803.8256        | 902.4165         | 16 |
| 14 | 1335.7532        | <b>668.3802</b>  | 1318.7266      | 659.8670         |                |                  | A    | <b>1707.7933</b> | <b>854.4003</b>  | <b>1690.7667</b> | 845.8870         | <b>1689.7827</b> | 845.3950         | 15 |
| 15 | 1463.8118        | <b>732.4095</b>  | 1446.7852      | 723.8962         |                |                  | Q    | <b>1636.7562</b> | 818.8817         | <b>1619.7296</b> | 810.3684         | <b>1618.7456</b> | 809.8764         | 14 |
| 16 | <b>1577.8547</b> | <b>789.4310</b>  | 1560.8281      | 780.9177         |                |                  | N    | <b>1508.6976</b> | 754.8524         | <b>1491.6710</b> | <b>746.3392</b>  | 1490.6870        | <b>745.8471</b>  | 13 |
| 17 | <b>1692.8816</b> | <b>846.9445</b>  | 1675.8551      | 838.4312         |                |                  | N    | <b>1394.6546</b> | 697.8310         | 1377.6281        | 689.3177         | 1376.6441        | 688.8257         | 12 |
| 18 | 1749.9031        | <b>875.4552</b>  | 1732.8765      | <b>866.9419</b>  |                |                  | G    | <b>1279.6277</b> | 640.3175         | 1262.6012        | 631.8042         | 1261.6171        | 631.3122         | 11 |
| 19 | 1836.9351        | <b>918.9712</b>  | 1819.9086      | 910.4579         | 1818.9246      | 909.9659         | S    | <b>1222.6062</b> | 611.8068         | 1205.5797        | 603.2935         | 1204.5957        | 602.8015         | 10 |
| 20 | <b>1950.9780</b> | <b>975.9927</b>  | 1933.9515      | 967.4794         | 1932.9675      | 966.9874         | N    | 1135.5742        | 568.2907         | 1118.5477        | 559.7775         | 1117.5636        | 559.2855         | 9  |
| 21 | 2098.0465        | <b>1049.5269</b> | 2081.0199      | 1041.0136        | 2080.0359      | 1040.5216        | F    | <b>1021.5313</b> | 511.2693         | 1004.5047        | <b>502.7560</b>  | <b>1003.5207</b> | <b>502.2640</b>  | 8  |
| 22 | 2226.1050        | <b>1113.5562</b> | 2209.0785      | <b>1105.0429</b> | 2208.0945      | <b>1104.5509</b> | Q    | <b>874.4629</b>  | 437.7351         | 857.4363         | 429.2218         | 856.4523         | 428.7298         | 7  |
| 23 | 2339.1891        | <b>1170.0982</b> | 2322.1626      | 1161.5849        | 2321.1785      | 1161.0929        | L    | <b>746.4043</b>  | 373.7058         | 729.3777         | 365.1925         | 728.3937         | 364.7005         | 6  |

|    |           |                  |           |                  |           |                  |          |                 |          |          |          |                 |          |          |
|----|-----------|------------------|-----------|------------------|-----------|------------------|----------|-----------------|----------|----------|----------|-----------------|----------|----------|
| 24 | 2468.2317 | <b>1234.6195</b> | 2451.2051 | <b>1226.1062</b> | 2450.2211 | 1225.6142        | <b>E</b> | <b>633.3202</b> | 317.1638 | 616.2937 | 308.6505 | 615.3097        | 308.1585 | <b>5</b> |
| 25 | 2597.2743 | <b>1299.1408</b> | 2580.2477 | <b>1290.6275</b> | 2579.2637 | 1290.1355        | <b>E</b> | <b>504.2776</b> | 252.6425 | 487.2511 | 244.1292 | <b>486.2671</b> | 243.6372 | <b>4</b> |
| 26 | 2710.3584 | <b>1355.6828</b> | 2693.3318 | <b>1347.1695</b> | 2692.3478 | 1346.6775        | <b>I</b> | <b>375.2350</b> | 188.1212 | 358.2085 | 179.6079 | 357.2245        | 179.1159 | <b>3</b> |
| 27 | 2797.3904 | <b>1399.1988</b> | 2780.3638 | <b>1390.6856</b> | 2779.3798 | <b>1390.1935</b> | <b>S</b> | 262.1510        | 131.5791 | 245.1244 | 123.0659 | 244.1404        | 122.5738 | <b>2</b> |
| 28 |           |                  |           |                  |           |                  | <b>R</b> | 175.1190        | 88.0631  | 158.0924 | 79.5498  |                 |          | <b>1</b> |

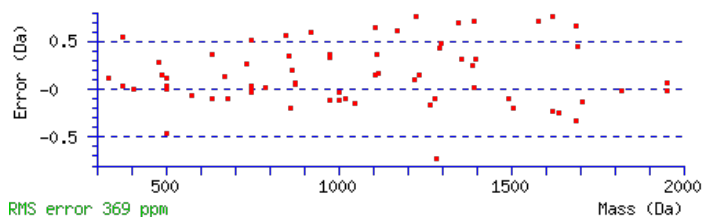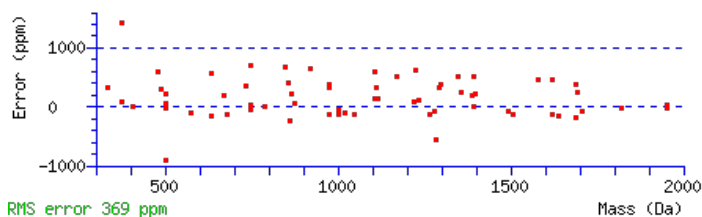

NCBI **BLAST** search of [VVHAAKAALAAFNAQNNGSNFQLEEISR](#)  
 (Parameters: blastp, nr protein database, expect=20000, no filter, PAM30)  
 Other BLAST [web gateways](#)

**All matches to this query**

| Score | Mr(calc)  | Delta  | Sequence                                     | Site Analysis         |
|-------|-----------|--------|----------------------------------------------|-----------------------|
| 87.8  | 2970.4947 | 2.0156 | <a href="#">VVHAAKAALAAFNAQNNGSNFQLEEISR</a> | Deamidated N17 38.52% |
| 86.7  | 2970.4947 | 2.0156 | <a href="#">VVHAAKAALAAFNAQNNGSNFQLEEISR</a> | Deamidated N16 29.97% |
| 85.7  | 2970.4947 | 2.0156 | <a href="#">VVHAAKAALAAFNAQNNGSNFQLEEISR</a> | Deamidated Q15 23.64% |
| 80.4  | 2970.4947 | 2.0156 | <a href="#">VVHAAKAALAAFNAQNNGSNFQLEEISR</a> | Deamidated N13 6.95%  |
| 69.6  | 2970.4947 | 2.0156 | <a href="#">VVHAAKAALAAFNAQNNGSNFQLEEISR</a> | Deamidated N20 0.58%  |
| 67.3  | 2970.4947 | 2.0156 | <a href="#">VVHAAKAALAAFNAQNNGSNFQLEEISR</a> | Deamidated Q22 0.34%  |
| 14.3  | 2970.5127 | 1.9976 | <a href="#">YFARSKQOHELLAYNAIGVLQELDK</a>    |                       |
| 14.3  | 2970.5127 | 1.9976 | <a href="#">YFARSKQOHELLAYNAIGVLQELDK</a>    |                       |
| 14.3  | 2971.4967 | 1.0136 | <a href="#">YFARSKQOHELLAYNAIGVLQELDK</a>    |                       |
| 13.8  | 2970.4908 | 2.0195 | <a href="#">DTDNGQROPLHQSLKQOPTTTLGHR</a>    |                       |

Mascot: <http://www.matrixscience.com/>

# MASCOT SCIENCE Mascot Search Results

## Peptide View

MS/MS Fragmentation of **VCQDCPLLAPLNDTR**

Found in **C9JV77** in **con\_Xuniprot\_HUMAN3**, C9JV77\_HUMAN Alpha-2-HS-glycoprotein OS=Homo sapiens GN=AHSG PE=2 SV=1

Match to Query 10006: 1772.811488 from(887.413020,2+) intensity(99616.7188) rtinseconds(1695) scans(4155) index(12639)

Title: 111019\_Est\_ISCardio\_NMI\_YS\_G\_9Spectrum3630\_scans\_\_4155

Data file C:\\mascot\\20140703\_Tmgf\_1D\\CSV\_UseAnalysis\\MasterCSV\\All\_Glyco\\mgf\\ptm\\UC18ERLIC\_PTM\_35D.mgf

Click mouse within plot area to zoom in by factor of two about that point

Or, to Da

Label all possible matches Label matches used for scoring

Show Y-axis

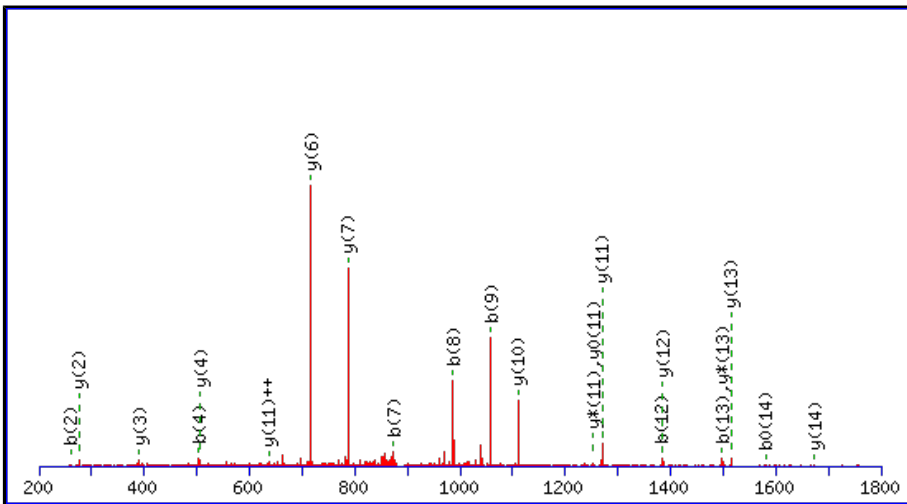

Monoisotopic mass of neutral peptide Mr(calc): 1772.8073

Fixed modifications: Carbamidomethyl (C) (apply to specified residues or termini only)

Variable modifications:

Q3 : Deamidated (NQ)

N12 : Deamidated (NQ)

Ions Score: 71 Expect: 1.2e-005

Matches : 22/156 fragment ions using 30 most intense peaks ([help](#))

| #  | b                | b <sup>++</sup> | b <sup>*</sup> | b <sup>*++</sup> | b <sup>0</sup>   | b <sup>0++</sup> | Seq. | y                | y <sup>++</sup> | y <sup>*</sup>   | y <sup>*++</sup> | y <sup>0</sup>   | y <sup>0++</sup> | #  |
|----|------------------|-----------------|----------------|------------------|------------------|------------------|------|------------------|-----------------|------------------|------------------|------------------|------------------|----|
| 1  | 100.0757         | 50.5415         |                |                  |                  |                  | V    |                  |                 |                  |                  |                  |                  | 15 |
| 2  | <b>260.1063</b>  | 130.5568        |                |                  |                  |                  | C    | <b>1674.7462</b> | 837.8767        | 1657.7196        | 829.3635         | 1656.7356        | 828.8714         | 14 |
| 3  | 389.1489         | 195.0781        | 372.1224       | 186.5648         |                  |                  | Q    | <b>1514.7155</b> | 757.8614        | <b>1497.6890</b> | 749.3481         | 1496.7050        | 748.8561         | 13 |
| 4  | <b>504.1759</b>  | 252.5916        | 487.1493       | 244.0783         | 486.1653         | 243.5863         | D    | <b>1385.6729</b> | 693.3401        | 1368.6464        | 684.8268         | 1367.6624        | 684.3348         | 12 |
| 5  | 664.2065         | 332.6069        | 647.1800       | 324.0936         | 646.1960         | 323.6016         | C    | <b>1270.6460</b> | <b>635.8266</b> | <b>1253.6195</b> | 627.3134         | <b>1252.6354</b> | 626.8214         | 11 |
| 6  | 761.2593         | 381.1333        | 744.2327       | 372.6200         | 743.2487         | 372.1280         | P    | <b>1110.6154</b> | 555.8113        | 1093.5888        | 547.2980         | 1092.6048        | 546.8060         | 10 |
| 7  | <b>874.3434</b>  | 437.6753        | 857.3168       | 429.1620         | 856.3328         | 428.6700         | L    | 1013.5626        | 507.2849        | 996.5360         | 498.7717         | 995.5520         | 498.2796         | 9  |
| 8  | <b>987.4274</b>  | 494.2173        | 970.4009       | 485.7041         | 969.4169         | 485.2121         | L    | 900.4785         | 450.7429        | 883.4520         | 442.2296         | 882.4680         | 441.7376         | 8  |
| 9  | <b>1058.4645</b> | 529.7359        | 1041.4380      | 521.2226         | 1040.4540        | 520.7306         | A    | <b>787.3945</b>  | 394.2009        | 770.3679         | 385.6876         | 769.3839         | 385.1956         | 7  |
| 10 | 1155.5173        | 578.2623        | 1138.4907      | 569.7490         | 1137.5067        | 569.2570         | P    | <b>716.3573</b>  | 358.6823        | 699.3308         | 350.1690         | 698.3468         | 349.6770         | 6  |
| 11 | 1268.6014        | 634.8043        | 1251.5748      | 626.2910         | 1250.5908        | 625.7990         | L    | 619.3046         | 310.1559        | 602.2780         | 301.6427         | 601.2940         | 301.1506         | 5  |
| 12 | <b>1383.6283</b> | 692.3178        | 1366.6018      | 683.8045         | 1365.6177        | 683.3125         | N    | <b>506.2205</b>  | 253.6139        | 489.1940         | 245.1006         | 488.2100         | 244.6086         | 4  |
| 13 | <b>1498.6552</b> | 749.8313        | 1481.6287      | 741.3180         | 1480.6447        | 740.8260         | D    | <b>391.1936</b>  | 196.1004        | 374.1670         | 187.5872         | 373.1830         | 187.0951         | 3  |
| 14 | 1599.7029        | 800.3551        | 1582.6764      | 791.8418         | <b>1581.6924</b> | 791.3498         | T    | <b>276.1666</b>  | 138.5870        | 259.1401         | 130.0737         | 258.1561         | 129.5817         | 2  |
| 15 |                  |                 |                |                  |                  |                  | R    | 175.1190         | 88.0631         | 158.0924         | 79.5498          |                  |                  | 1  |

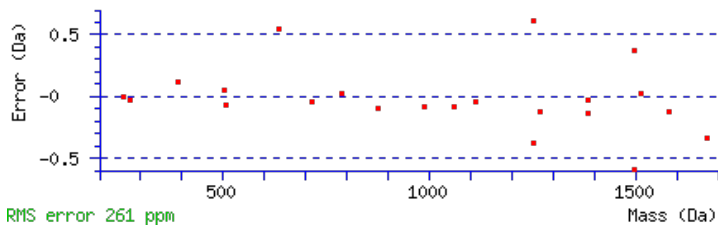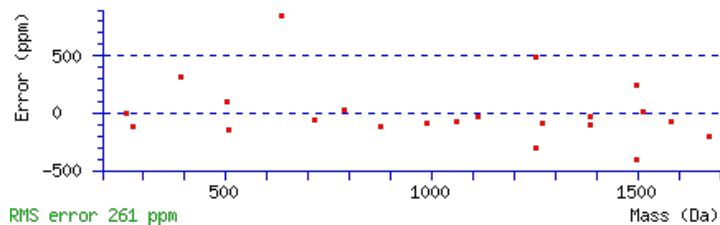

NCBI BLAST search of [VCQDCPLLAPLNDTR](#)

(Parameters: blastp, nr protein database, expect=20000, no filter, PAM30)

Other BLAST [web gateways](#)

**All matches to this query**

| Score | Mr(calc)  | Delta   | Sequence                          |
|-------|-----------|---------|-----------------------------------|
| 71.3  | 1772.8073 | 0.0042  | <a href="#">VCQDCPLLAPLNDTR</a>   |
| 10.0  | 1771.8154 | 0.9961  | <a href="#">CKSMEQGMSNLLTLK</a>   |
| 7.5   | 1771.8154 | 0.9961  | <a href="#">CKSMEQGMSNLLTLK</a>   |
| 7.3   | 1772.8177 | -0.0062 | <a href="#">GRNDSGEENVPLDLTR</a>  |
| 3.0   | 1772.8046 | 0.0069  | <a href="#">SCQQLPATDMRRHR</a>    |
| 2.0   | 1772.8176 | -0.0061 | <a href="#">GRNQQIARPSQEEK</a>    |
| 1.3   | 1772.8176 | -0.0062 | <a href="#">SSEDPNEDIVERNIR</a>   |
| 1.3   | 1771.8047 | 1.0068  | <a href="#">TVAPQGQDMASIAPDNR</a> |
| 1.3   | 1771.8022 | 1.0093  | <a href="#">RWCDVTGTYMIDAGK</a>   |
| 0.4   | 1771.8151 | 0.9963  | <a href="#">NEYEQLNYAKQLKE</a>    |

Mascot: <http://www.matrixscience.com/>

# MASCOT SCIENCE Mascot Search Results

## Peptide View

MS/MS Fragmentation of **AALAAFNAQNGSNFQLEEISR**

Found in **C9JV77** in **con\_Xuniprot\_HUMAN3**, C9JV77\_HUMAN Alpha-2-HS-glycoprotein OS=Homo sapiens GN=AHSG PE=2 SV=1

Match to Query 20929: 2366.120322 from(789.714050,3+) intensity(127655.1016) rtinseconds(1748) scans(4435) index(24587)

Title: 111019\_Est\_MI\_YS\_G\_06Spectrum3858\_scans\_\_4435

Data file C:\mascot\20140703\_Tmgf\_1D\CSV\_UseAnalysis\MasterCSV\All\_Glyco\mgf\ptm\UC18ERLIC\_PTM\_35D.mgf

Click mouse within plot area to zoom in by factor of two about that point

Or,  to  Da

Label all possible matches  Label matches used for scoring

Show Y-axis

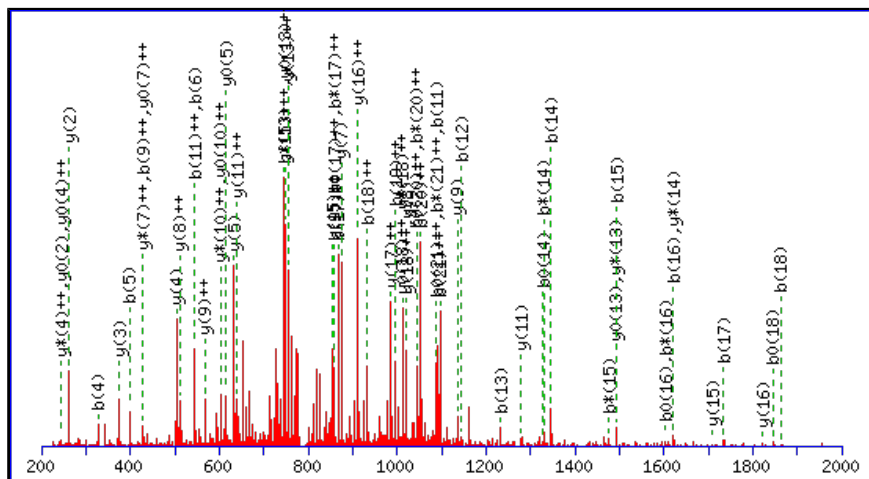

Monoisotopic mass of neutral peptide Mr(calc): 2366.1138

Fixed modifications: Carbamidomethyl (C) (apply to specified residues or termini only)

Variable modifications:

N10 : Deamidated (NQ)

N11 : Deamidated (NQ)

Ions Score: 58 Expect: 0.00035

Matches : 66/214 fragment ions using 103 most intense peaks ([help](#))

| #  | b                | b <sup>++</sup>  | b <sup>*</sup>   | b <sup>*++</sup> | b <sup>0</sup>   | b <sup>0++</sup> | Seq. | y                | y <sup>++</sup>  | y <sup>*</sup>   | y <sup>*++</sup> | y <sup>0</sup>   | y <sup>0++</sup> | #  |
|----|------------------|------------------|------------------|------------------|------------------|------------------|------|------------------|------------------|------------------|------------------|------------------|------------------|----|
| 1  | 72.0444          | 36.5258          |                  |                  |                  |                  | A    |                  |                  |                  |                  |                  |                  | 22 |
| 2  | 143.0815         | 72.0444          |                  |                  |                  |                  | A    | 2296.0840        | 1148.5457        | 2279.0575        | 1140.0324        | 2278.0735        | 1139.5404        | 21 |
| 3  | 256.1656         | 128.5864         |                  |                  |                  |                  | L    | 2225.0469        | 1113.0271        | 2208.0204        | 1104.5138        | 2207.0364        | 1104.0218        | 20 |
| 4  | <b>327.2027</b>  | 164.1050         |                  |                  |                  |                  | A    | 2111.9629        | 1056.4851        | 2094.9363        | 1047.9718        | 2093.9523        | 1047.4798        | 19 |
| 5  | <b>398.2398</b>  | 199.6235         |                  |                  |                  |                  | A    | 2040.9257        | <b>1020.9665</b> | 2023.8992        | <b>1012.4532</b> | 2022.9152        | <b>1011.9612</b> | 18 |
| 6  | <b>545.3082</b>  | 273.1577         |                  |                  |                  |                  | F    | 1969.8886        | <b>985.4480</b>  | 1952.8621        | 976.9347         | 1951.8781        | 976.4427         | 17 |
| 7  | 659.3511         | 330.1792         | 642.3246         | 321.6659         |                  |                  | N    | <b>1822.8202</b> | <b>911.9137</b>  | 1805.7937        | 903.4005         | 1804.8096        | 902.9085         | 16 |
| 8  | 730.3883         | 365.6978         | 713.3617         | 357.1845         |                  |                  | A    | <b>1708.7773</b> | <b>854.8923</b>  | 1691.7507        | 846.3790         | 1690.7667        | 845.8870         | 15 |
| 9  | <b>858.4468</b>  | <b>429.7271</b>  | 841.4203         | 421.2138         |                  |                  | Q    | 1637.7402        | 819.3737         | <b>1620.7136</b> | 810.8604         | 1619.7296        | 810.3684         | 14 |
| 10 | 973.4738         | 487.2405         | 956.4472         | 478.7272         |                  |                  | N    | 1509.6816        | <b>755.3444</b>  | <b>1492.6550</b> | <b>746.8312</b>  | <b>1491.6710</b> | <b>746.3392</b>  | 13 |
| 11 | <b>1088.5007</b> | <b>544.7540</b>  | 1071.4742        | 536.2407         |                  |                  | N    | 1394.6546        | 697.8310         | 1377.6281        | 689.3177         | 1376.6441        | 688.8257         | 12 |
| 12 | <b>1145.5222</b> | 573.2647         | 1128.4956        | 564.7515         |                  |                  | G    | <b>1279.6277</b> | <b>640.3175</b>  | 1262.6012        | 631.8042         | 1261.6171        | 631.3122         | 11 |
| 13 | <b>1232.5542</b> | 616.7807         | 1215.5277        | 608.2675         | 1214.5436        | 607.7755         | S    | 1222.6062        | 611.8068         | 1205.5797        | <b>603.2935</b>  | 1204.5957        | <b>602.8015</b>  | 10 |
| 14 | <b>1346.5971</b> | 673.8022         | <b>1329.5706</b> | 665.2889         | <b>1328.5866</b> | 664.7969         | N    | <b>1135.5742</b> | <b>568.2907</b>  | 1118.5477        | 559.7775         | 1117.5636        | 559.2855         | 9  |
| 15 | <b>1493.6655</b> | <b>747.3364</b>  | <b>1476.6390</b> | 738.8231         | 1475.6550        | 738.3311         | F    | <b>1021.5313</b> | <b>511.2693</b>  | 1004.5047        | 502.7560         | 1003.5207        | 502.2640         | 8  |
| 16 | <b>1621.7241</b> | 811.3657         | <b>1604.6976</b> | 802.8524         | <b>1603.7136</b> | 802.3604         | Q    | <b>874.4629</b>  | 437.7351         | 857.4363         | <b>429.2218</b>  | 856.4523         | <b>428.7298</b>  | 7  |
| 17 | <b>1734.8082</b> | <b>867.9077</b>  | 1717.7816        | <b>859.3945</b>  | 1716.7976        | <b>858.9025</b>  | L    | <b>746.4043</b>  | 373.7058         | 729.3777         | 365.1925         | 728.3937         | 364.7005         | 6  |
| 18 | <b>1863.8508</b> | <b>932.4290</b>  | 1846.8242        | 923.9158         | <b>1845.8402</b> | 923.4237         | E    | <b>633.3202</b>  | 317.1638         | 616.2937         | 308.6505         | <b>615.3097</b>  | 308.1585         | 5  |
| 19 | 1992.8934        | <b>996.9503</b>  | 1975.8668        | 988.4371         | 1974.8828        | 987.9450         | E    | <b>504.2776</b>  | 252.6425         | 487.2511         | <b>244.1292</b>  | 486.2671         | <b>243.6372</b>  | 4  |
| 20 | 2105.9774        | <b>1053.4924</b> | 2088.9509        | <b>1044.9791</b> | 2087.9669        | <b>1044.4871</b> | I    | <b>375.2350</b>  | 188.1212         | 358.2085         | 179.6079         | 357.2245         | 179.1159         | 3  |
| 21 | 2193.0095        | <b>1097.0084</b> | 2175.9829        | <b>1088.4951</b> | 2174.9989        | <b>1088.0031</b> | S    | <b>262.1510</b>  | 131.5791         | 245.1244         | 123.0659         | <b>244.1404</b>  | 122.5738         | 2  |
| 22 |                  |                  |                  |                  |                  |                  | R    | 175.1190         | 88.0631          | 158.0924         | 79.5498          |                  |                  | 1  |

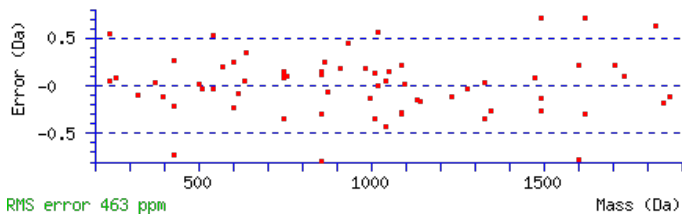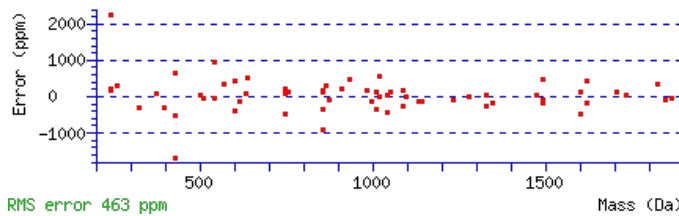

NCBI BLAST search of [AALAAFNAQNNGSNFQLEEISR](#)

(Parameters: blastp, nr protein database, expect=20000, no filter, PAM30)

Other BLAST [web gateways](#)

All matches to this query

| Score | Mr(calc)  | Delta  | Sequence                               | Site Analysis              |
|-------|-----------|--------|----------------------------------------|----------------------------|
| 58.3  | 2366.1138 | 0.0065 | <a href="#">AALAAFNAQNNGSNFQLEEISR</a> | Deamidated N10, N11 14.58% |
| 57.6  | 2366.1138 | 0.0065 | <a href="#">AALAAFNAQNNGSNFQLEEISR</a> | Deamidated Q9, N10 12.46%  |
| 56.8  | 2366.1138 | 0.0065 | <a href="#">AALAAFNAQNNGSNFQLEEISR</a> | Deamidated Q9, N11 10.46%  |
| 56.0  | 2366.1138 | 0.0065 | <a href="#">AALAAFNAQNNGSNFQLEEISR</a> | Deamidated N11, N14 8.70%  |
| 56.0  | 2366.1138 | 0.0065 | <a href="#">AALAAFNAQNNGSNFQLEEISR</a> | Deamidated N10, N14 8.70%  |
| 55.8  | 2366.1138 | 0.0065 | <a href="#">AALAAFNAQNNGSNFQLEEISR</a> | Deamidated Q9, N14 8.27%   |
| 55.0  | 2366.1138 | 0.0065 | <a href="#">AALAAFNAQNNGSNFQLEEISR</a> | Deamidated N11, Q16 6.91%  |
| 55.0  | 2366.1138 | 0.0065 | <a href="#">AALAAFNAQNNGSNFQLEEISR</a> | Deamidated N10, Q16 6.91%  |
| 54.6  | 2366.1138 | 0.0065 | <a href="#">AALAAFNAQNNGSNFQLEEISR</a> | Deamidated Q9, Q16 6.20%   |
| 51.9  | 2366.1138 | 0.0065 | <a href="#">AALAAFNAQNNGSNFQLEEISR</a> | Deamidated N7, N11 3.38%   |

Mascot: <http://www.matrixscience.com/>



# MATRIX SCIENCE Mascot Search Results

## Peptide View

MS/MS Fragmentation of **VCQDCPLLAPLNDTRVVHAAK**

Found in **C9JV77** in **con\_Xuniprot\_HUMAN3**, C9JV77\_HUMAN Alpha-2-HS-glycoprotein OS=Homo sapiens GN=AHSG PE=2 SV=1

Match to Query 20958: 2377.196382 from(793.406070,3+) intensity(336520.6875) rtinseconds(1474) scans(3638) index(22570)

Title: 111019\_Est\_MI\_YS\_G\_03Spectrum3166\_scans\_\_3638

Data file C:\mascot\20140703\_Tmgf\_1D\CSV\_UseAnalysis\MasterCSV\All\_Glyco\mgf\ptm\UC18ERLIC\_PTM\_35D.mgf

Click mouse within plot area to zoom in by factor of two about that point

Or, to Da

Label all possible matches Label matches used for scoring

Show Y-axis

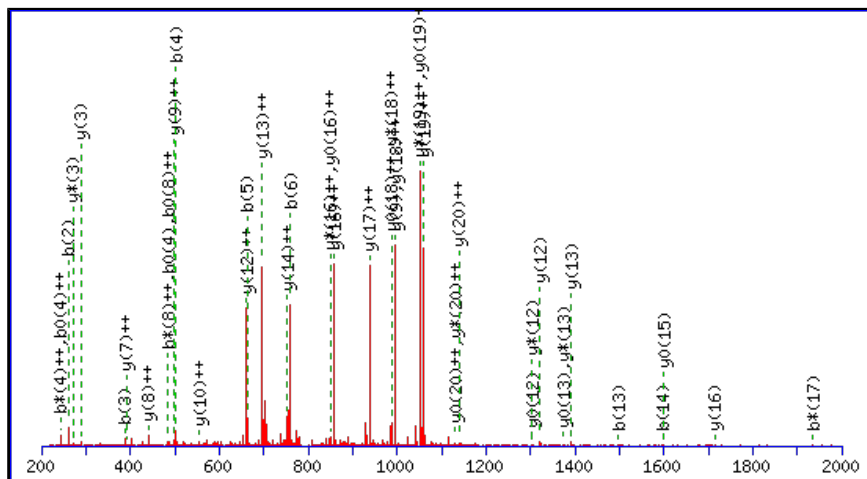

Monoisotopic mass of neutral peptide Mr(calc): 2377.1882

Fixed modifications: Carbamidomethyl (C) (apply to specified residues or termini only)

Variable modifications: N12 : Deamidated (NQ)

Ions Score: 55 Expect: 0.00085

Matches : 44/216 fragment ions using 83 most intense peaks ([help](#))

| #  | b         | b <sup>++</sup> | b <sup>*</sup> | b <sup>*++</sup> | b <sup>0</sup> | b <sup>0++</sup> | Seq. | y         | y <sup>++</sup> | y <sup>*</sup> | y <sup>*++</sup> | y <sup>0</sup> | y <sup>0++</sup> | #  |
|----|-----------|-----------------|----------------|------------------|----------------|------------------|------|-----------|-----------------|----------------|------------------|----------------|------------------|----|
| 1  | 100.0757  | 50.5415         |                |                  |                |                  | V    |           |                 |                |                  |                |                  | 21 |
| 2  | 260.1063  | 130.5568        |                |                  |                |                  | C    | 2279.1271 | 1140.0672       | 2262.1006      | 1131.5539        | 2261.1165      | 1131.0619        | 20 |
| 3  | 388.1649  | 194.5861        | 371.1384       | 186.0728         |                |                  | Q    | 2119.0965 | 1060.0519       | 2102.0699      | 1051.5386        | 2101.0859      | 1051.0466        | 19 |
| 4  | 503.1919  | 252.0996        | 486.1653       | 243.5863         | 485.1813       | 243.0943         | D    | 1991.0379 | 996.0226        | 1974.0113      | 987.5093         | 1973.0273      | 987.0173         | 18 |
| 5  | 663.2225  | 332.1149        | 646.1960       | 323.6016         | 645.2119       | 323.1096         | C    | 1876.0109 | 938.5091        | 1858.9844      | 929.9958         | 1858.0004      | 929.5038         | 17 |
| 6  | 760.2753  | 380.6413        | 743.2487       | 372.1280         | 742.2647       | 371.6360         | P    | 1715.9803 | 858.4938        | 1698.9537      | 849.9805         | 1697.9697      | 849.4885         | 16 |
| 7  | 873.3593  | 437.1833        | 856.3328       | 428.6700         | 855.3488       | 428.1780         | L    | 1618.9275 | 809.9674        | 1601.9010      | 801.4541         | 1600.9170      | 800.9621         | 15 |
| 8  | 986.4434  | 493.7253        | 969.4169       | 485.2121         | 968.4328       | 484.7201         | L    | 1505.8435 | 753.4254        | 1488.8169      | 744.9121         | 1487.8329      | 744.4201         | 14 |
| 9  | 1057.4805 | 529.2439        | 1040.4540      | 520.7306         | 1039.4700      | 520.2386         | A    | 1392.7594 | 696.8833        | 1375.7328      | 688.3701         | 1374.7488      | 687.8781         | 13 |
| 10 | 1154.5333 | 577.7703        | 1137.5067      | 569.2570         | 1136.5227      | 568.7650         | P    | 1321.7223 | 661.3648        | 1304.6957      | 652.8515         | 1303.7117      | 652.3595         | 12 |
| 11 | 1267.6173 | 634.3123        | 1250.5908      | 625.7990         | 1249.6068      | 625.3070         | L    | 1224.6695 | 612.8384        | 1207.6430      | 604.3251         | 1206.6589      | 603.8331         | 11 |
| 12 | 1382.6443 | 691.8258        | 1365.6177      | 683.3125         | 1364.6337      | 682.8205         | N    | 1111.5854 | 556.2964        | 1094.5589      | 547.7831         | 1093.5749      | 547.2911         | 10 |
| 13 | 1497.6712 | 749.3393        | 1480.6447      | 740.8260         | 1479.6607      | 740.3340         | D    | 996.5585  | 498.7829        | 979.5320       | 490.2696         | 978.5479       | 489.7776         | 9  |
| 14 | 1598.7189 | 799.8631        | 1581.6924      | 791.3498         | 1580.7083      | 790.8578         | T    | 881.5316  | 441.2694        | 864.5050       | 432.7561         | 863.5210       | 432.2641         | 8  |
| 15 | 1754.8200 | 877.9136        | 1737.7935      | 869.4004         | 1736.8095      | 868.9084         | R    | 780.4839  | 390.7456        | 763.4573       | 382.2323         |                |                  | 7  |
| 16 | 1853.8884 | 927.4479        | 1836.8619      | 918.9346         | 1835.8779      | 918.4426         | V    | 624.3828  | 312.6950        | 607.3562       | 304.1817         |                |                  | 6  |
| 17 | 1952.9568 | 976.9821        | 1935.9303      | 968.4688         | 1934.9463      | 967.9768         | V    | 525.3144  | 263.1608        | 508.2878       | 254.6475         |                |                  | 5  |
| 18 | 2090.0158 | 1045.5115       | 2072.9892      | 1036.9982        | 2072.0052      | 1036.5062        | H    | 426.2459  | 213.6266        | 409.2194       | 205.1133         |                |                  | 4  |
| 19 | 2161.0529 | 1081.0301       | 2144.0263      | 1072.5168        | 2143.0423      | 1072.0248        | A    | 289.1870  | 145.0972        | 272.1605       | 136.5839         |                |                  | 3  |
| 20 | 2232.0900 | 1116.5486       | 2215.0634      | 1108.0354        | 2214.0794      | 1107.5433        | A    | 218.1499  | 109.5786        | 201.1234       | 101.0653         |                |                  | 2  |
| 21 |           |                 |                |                  |                |                  | K    | 147.1128  | 74.0600         | 130.0863       | 65.5468          |                |                  | 1  |

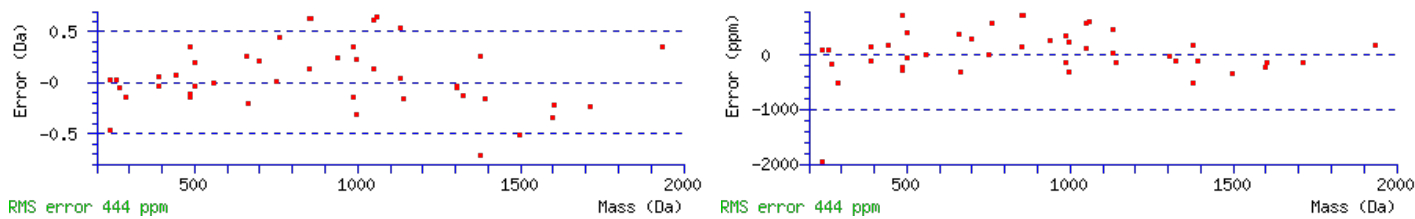

NCBI BLAST search of [VCQDCPLLAPLNDTRVVHAAK](#)  
 (Parameters: blastp, nr protein database, expect=20000, no filter, PAM30)  
 Other BLAST [web gateways](#)

All matches to this query

| Score | Mr(calc)  | Delta  | Sequence                               | Site Analysis         |
|-------|-----------|--------|----------------------------------------|-----------------------|
| 55.1  | 2377.1882 | 0.0081 | <a href="#">VCQDCPLLAPLNDTRVVHAAK</a>  | Deamidated N12 92.59% |
| 44.1  | 2377.1882 | 0.0081 | <a href="#">VCQDCPLLAPLNDTRVVHAAK</a>  | Deamidated Q3 7.41%   |
| 43.8  | 2376.2042 | 0.9922 | <a href="#">VCQDCPLLAPLNDTRVVHAAK</a>  |                       |
| 9.8   | 2376.2033 | 0.9931 | <a href="#">DALDQLLTNKRLHPQQAAGQR</a>  |                       |
| 8.6   | 2376.2033 | 0.9931 | <a href="#">DALDQLLTNKRLHPQQAAGQR</a>  |                       |
| 8.6   | 2377.1873 | 0.0091 | <a href="#">DALDQLLTNKRLHPQQAAGQR</a>  |                       |
| 8.2   | 2376.1916 | 1.0048 | <a href="#">MSALVQPCTPESEALTLGSIKK</a> |                       |
| 7.2   | 2376.1929 | 1.0034 | <a href="#">HKPQILMMELAHGLQDQNLK</a>   |                       |
| 7.2   | 2376.1929 | 1.0034 | <a href="#">HKPQILMMELAHGLQDQNLK</a>   |                       |
| 7.1   | 2376.1916 | 1.0048 | <a href="#">EGEATLVVDIMEALEKMNOIK</a>  |                       |

Mascot: <http://www.matrixscience.com/>

# MASCOT SCIENCE Mascot Search Results

## Peptide View

MS/MS Fragmentation of **KVCQDCPLLAPLNDTRVHAAK**

Found in **C9JV77** in **con\_Xuniprot\_HUMAN3**, C9JV77\_HUMAN Alpha-2-HS-glycoprotein OS=Homo sapiens GN=AHSG PE=2 SV=1

Match to Query 21591: 2505.294552 from(836.105460,3+) intensity(19801.5391) rtinseconds(1194) scans(3014) index(23864)

Title: 111019\_Est\_MI\_YS\_G\_05Spectrum2583\_scans\_\_3014

Data file C:\mascot\20140703\_Tmgf\_1D\CSV\_UseAnalysis\MasterCSV\All\_Glyco\mgf\ptm\UC18ERLIC\_PTM\_35D.mgf

Click mouse within plot area to zoom in by factor of two about that point

Or,  to  Da

Label all possible matches  Label matches used for scoring

Show Y-axis

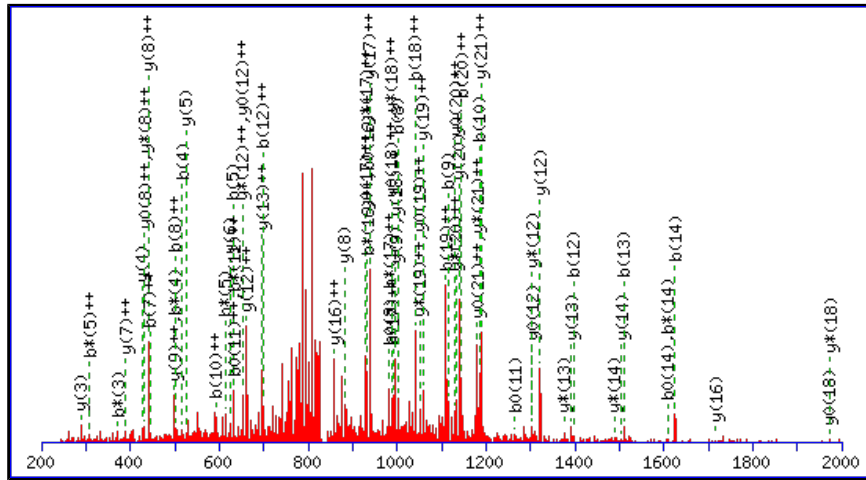

Monoisotopic mass of neutral peptide Mr(calc): 2505.2832

Fixed modifications: Carbamidomethyl (C) (apply to specified residues or termini only)

Variable modifications:

N13 : Deamidated (NQ)

Ions Score: 52 Expect: 0.0012

Matches : 71/230 fragment ions using 150 most intense peaks ([help](#))

| #  | b                | b <sup>++</sup>  | b <sup>*</sup>   | b <sup>*++</sup> | b <sup>0</sup>   | b <sup>0++</sup> | Seq.     | y                | y <sup>++</sup>  | y <sup>*</sup>   | y <sup>*++</sup> | y <sup>0</sup>   | y <sup>0++</sup> | #         |
|----|------------------|------------------|------------------|------------------|------------------|------------------|----------|------------------|------------------|------------------|------------------|------------------|------------------|-----------|
| 1  | 129.1022         | 65.0548          | 112.0757         | 56.5415          |                  |                  | <b>K</b> |                  |                  |                  |                  |                  |                  | <b>22</b> |
| 2  | 228.1707         | 114.5890         | 211.1441         | 106.0757         |                  |                  | <b>V</b> | 2378.1955        | <b>1189.6014</b> | 2361.1690        | <b>1181.0881</b> | 2360.1849        | <b>1180.5961</b> | <b>21</b> |
| 3  | 388.2013         | 194.6043         | <b>371.1748</b>  | 186.0910         |                  |                  | <b>C</b> | 2279.1271        | <b>1140.0672</b> | 2262.1006        | <b>1131.5539</b> | 2261.1165        | <b>1131.0619</b> | <b>20</b> |
| 4  | <b>516.2599</b>  | 258.6336         | <b>499.2333</b>  | 250.1203         |                  |                  | <b>Q</b> | 2119.0965        | <b>1060.0519</b> | 2102.0699        | <b>1051.5386</b> | 2101.0859        | <b>1051.0466</b> | <b>19</b> |
| 5  | <b>631.2868</b>  | 316.1470         | <b>614.2603</b>  | <b>307.6338</b>  | 613.2763         | 307.1418         | <b>D</b> | 1991.0379        | <b>996.0226</b>  | <b>1974.0113</b> | <b>987.5093</b>  | <b>1973.0273</b> | <b>987.0173</b>  | <b>18</b> |
| 6  | 791.3175         | 396.1624         | 774.2909         | 387.6491         | 773.3069         | 387.1571         | <b>C</b> | 1876.0109        | <b>938.5091</b>  | 1858.9844        | <b>929.9958</b>  | 1858.0004        | <b>929.5038</b>  | <b>17</b> |
| 7  | 888.3702         | <b>444.6888</b>  | 871.3437         | 436.1755         | 870.3597         | 435.6835         | <b>P</b> | <b>1715.9803</b> | <b>858.4938</b>  | 1698.9537        | 849.9805         | 1697.9697        | 849.4885         | <b>16</b> |
| 8  | <b>1001.4543</b> | <b>501.2308</b>  | 984.4278         | 492.7175         | <b>983.4437</b>  | 492.2255         | <b>L</b> | 1618.9275        | 809.9674         | 1601.9010        | 801.4541         | 1600.9170        | 800.9621         | <b>15</b> |
| 9  | <b>1114.5384</b> | 557.7728         | 1097.5118        | 549.2595         | 1096.5278        | 548.7675         | <b>L</b> | <b>1505.8435</b> | 753.4254         | <b>1488.8169</b> | 744.9121         | 1487.8329        | 744.4201         | <b>14</b> |
| 10 | <b>1185.5755</b> | <b>593.2914</b>  | 1168.5489        | 584.7781         | 1167.5649        | 584.2861         | <b>A</b> | <b>1392.7594</b> | <b>696.8833</b>  | <b>1375.7328</b> | 688.3701         | 1374.7488        | 687.8781         | <b>13</b> |
| 11 | 1282.6282        | 641.8178         | 1265.6017        | <b>633.3045</b>  | <b>1264.6177</b> | <b>632.8125</b>  | <b>P</b> | <b>1321.7223</b> | <b>661.3648</b>  | <b>1304.6957</b> | <b>652.8515</b>  | <b>1303.7117</b> | <b>652.3595</b>  | <b>12</b> |
| 12 | <b>1395.7123</b> | <b>698.3598</b>  | 1378.6858        | 689.8465         | 1377.7017        | 689.3545         | <b>L</b> | 1224.6695        | 612.8384         | 1207.6430        | 604.3251         | 1206.6589        | 603.8331         | <b>11</b> |
| 13 | <b>1510.7392</b> | 755.8733         | 1493.7127        | 747.3600         | 1492.7287        | 746.8680         | <b>N</b> | 1111.5854        | 556.2964         | 1094.5589        | 547.7831         | 1093.5749        | 547.2911         | <b>10</b> |
| 14 | <b>1625.7662</b> | 813.3867         | <b>1608.7396</b> | 804.8735         | <b>1607.7556</b> | 804.3815         | <b>D</b> | <b>996.5585</b>  | <b>498.7829</b>  | 979.5320         | 490.2696         | 978.5479         | 489.7776         | <b>9</b>  |
| 15 | 1726.8139        | 863.9106         | 1709.7873        | 855.3973         | 1708.8033        | 854.9053         | <b>T</b> | <b>881.5316</b>  | <b>441.2694</b>  | 864.5050         | <b>432.7561</b>  | 863.5210         | <b>432.2641</b>  | <b>8</b>  |
| 16 | 1882.9150        | 941.9611         | 1865.8884        | <b>933.4479</b>  | 1864.9044        | <b>932.9558</b>  | <b>R</b> | 780.4839         | <b>390.7456</b>  | 763.4573         | 382.2323         |                  |                  | <b>7</b>  |
| 17 | 1981.9834        | <b>991.4953</b>  | 1964.9568        | <b>982.9821</b>  | 1963.9728        | 982.4901         | <b>V</b> | <b>624.3828</b>  | 312.6950         | 607.3562         | 304.1817         |                  |                  | <b>6</b>  |
| 18 | 2081.0518        | <b>1041.0295</b> | 2064.0253        | 1032.5163        | 2063.0412        | 1032.0243        | <b>V</b> | <b>525.3144</b>  | 263.1608         | 508.2878         | 254.6475         |                  |                  | <b>5</b>  |
| 19 | 2218.1107        | <b>1109.5590</b> | 2201.0842        | 1101.0457        | 2200.1002        | 1100.5537        | <b>H</b> | <b>426.2459</b>  | 213.6266         | 409.2194         | 205.1133         |                  |                  | <b>4</b>  |
| 20 | 2289.1478        | <b>1145.0776</b> | 2272.1213        | 1136.5643        | 2271.1373        | 1136.0723        | <b>A</b> | <b>289.1870</b>  | 145.0972         | 272.1605         | 136.5839         |                  |                  | <b>3</b>  |
| 21 | 2360.1850        | <b>1180.5961</b> | 2343.1584        | 1172.0828        | 2342.1744        | 1171.5908        | <b>A</b> | 218.1499         | 109.5786         | 201.1234         | 101.0653         |                  |                  | <b>2</b>  |
| 22 |                  |                  |                  |                  |                  |                  | <b>K</b> | 147.1128         | 74.0600          | 130.0863         | 65.5468          |                  |                  | <b>1</b>  |

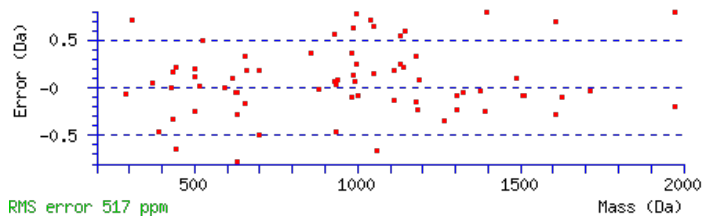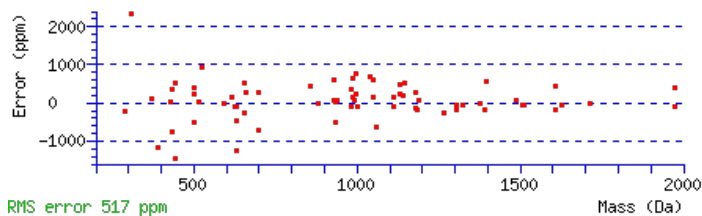

NCBI BLAST search of [KVCQDCPLLAPLNDTRVVHAAK](#)

(Parameters: blastp, nr protein database, expect=20000, no filter, PAM30)

Other BLAST [web gateways](#)

All matches to this query

| Score | Mr(calc)  | Delta  | Sequence                                | Site Analysis         |
|-------|-----------|--------|-----------------------------------------|-----------------------|
| 52.5  | 2505.2832 | 0.0114 | <a href="#">KVCQDCPLLAPLNDTRVVHAAK</a>  | Deamidated N13 99.49% |
| 30.0  | 2504.2992 | 0.9954 | <a href="#">KVCQDCPLLAPLNDTRVVHAAK</a>  |                       |
| 29.6  | 2505.2832 | 0.0114 | <a href="#">KVCQDCPLLAPLNDTRVVHAAK</a>  | Deamidated Q4 0.51%   |
| 2.5   | 2505.2837 | 0.0109 | <a href="#">THVWSPGSRVAGTGSGSVSHAIR</a> |                       |

Mascot: <http://www.matrixscience.com/>

# MATRIX SCIENCE Mascot Search Results

## Peptide View

MS/MS Fragmentation of **AALAAFNAQNNGSNFQLEEISR**

Found in **C9JV77** in **con\_Xuniprot\_HUMAN3**, C9JV77\_HUMAN Alpha-2-HS-glycoprotein OS=Homo sapiens GN=AHSG PE=2 SV=1

Match to Query 20928: 2366.117772 from(789.713200,3+) intensity(51567.6016) rtinseconds(1763) scans(4477) index(24592)

Title: 111019\_Est\_ML\_YS\_G\_06Spectrum3894\_scans\_\_4477

Data file C:\mascot\20140703\_Tmgf\_1D\CSV\_UseAnalysis\MasterCSV\All\_Glyco\mgf\ptm\UC18ERLIC\_PTM\_35D.mgf

Click mouse within plot area to zoom in by factor of two about that point

Or, to Da

Label all possible matches Label matches used for scoring

Show Y-axis

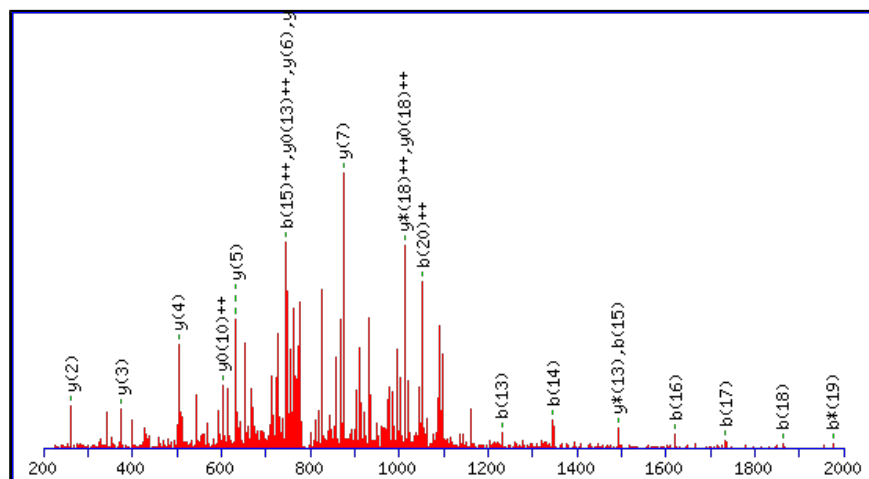

Monoisotopic mass of neutral peptide Mr(calc): 2366.1138

Fixed modifications: Carbamidomethyl (C) (apply to specified residues or termini only)

Variable modifications:

N11 : Deamidated (NQ)

Q16 : Deamidated (NQ)

Ions Score: 51 Expect: 0.0018

Matches : 21/214 fragment ions using 18 most intense peaks ([help](#))

| #  | b                | b <sup>++</sup>  | b <sup>*</sup>   | b <sup>*++</sup> | b <sup>0</sup> | b <sup>0++</sup> | Seq. | y               | y <sup>++</sup> | y <sup>*</sup> | y <sup>*++</sup> | y <sup>0</sup> | y <sup>0++</sup> | #  |
|----|------------------|------------------|------------------|------------------|----------------|------------------|------|-----------------|-----------------|----------------|------------------|----------------|------------------|----|
| 1  | 72.0444          | 36.5258          |                  |                  |                |                  | A    |                 |                 |                |                  |                |                  | 22 |
| 2  | 143.0815         | 72.0444          |                  |                  |                |                  | A    | 2296.0840       | 1148.5457       | 2279.0575      | 1140.0324        | 2278.0735      | 1139.5404        | 21 |
| 3  | 256.1656         | 128.5864         |                  |                  |                |                  | L    | 2225.0469       | 1113.0271       | 2208.0204      | 1104.5138        | 2207.0364      | 1104.0218        | 20 |
| 4  | 327.2027         | 164.1050         |                  |                  |                |                  | A    | 2111.9629       | 1056.4851       | 2094.9363      | 1047.9718        | 2093.9523      | 1047.4798        | 19 |
| 5  | 398.2398         | 199.6235         |                  |                  |                |                  | A    | 2040.9257       | 1020.9665       | 2023.8992      | 1012.4532        | 2022.9152      | 1011.9612        | 18 |
| 6  | 545.3082         | 273.1577         |                  |                  |                |                  | F    | 1969.8886       | 985.4480        | 1952.8621      | 976.9347         | 1951.8781      | 976.4427         | 17 |
| 7  | 659.3511         | 330.1792         | 642.3246         | 321.6659         |                |                  | N    | 1822.8202       | 911.9137        | 1805.7937      | 903.4005         | 1804.8096      | 902.9085         | 16 |
| 8  | 730.3883         | 365.6978         | 713.3617         | 357.1845         |                |                  | A    | 1708.7773       | 854.8923        | 1691.7507      | 846.3790         | 1690.7667      | 845.8870         | 15 |
| 9  | 858.4468         | 429.7271         | 841.4203         | 421.2138         |                |                  | Q    | 1637.7402       | 819.3737        | 1620.7136      | 810.8604         | 1619.7296      | 810.3684         | 14 |
| 10 | 972.4898         | 486.7485         | 955.4632         | 478.2352         |                |                  | N    | 1509.6816       | 755.3444        | 1492.6550      | 746.8312         | 1491.6710      | 746.3392         | 13 |
| 11 | 1087.5167        | 544.2620         | 1070.4902        | 535.7487         |                |                  | N    | 1395.6387       | 698.3230        | 1378.6121      | 689.8097         | 1377.6281      | 689.3177         | 12 |
| 12 | 1144.5382        | 572.7727         | 1127.5116        | 564.2594         |                |                  | G    | 1280.6117       | 640.8095        | 1263.5852      | 632.2962         | 1262.6012      | 631.8042         | 11 |
| 13 | <b>1231.5702</b> | 616.2887         | 1214.5436        | 607.7755         | 1213.5596      | 607.2835         | S    | 1223.5903       | 612.2988        | 1206.5637      | 603.7855         | 1205.5797      | 603.2935         | 10 |
| 14 | <b>1345.6131</b> | 673.3102         | 1328.5866        | 664.7969         | 1327.6026      | 664.3049         | N    | 1136.5582       | 568.7828        | 1119.5317      | 560.2695         | 1118.5477      | 559.7775         | 9  |
| 15 | <b>1492.6815</b> | <b>746.8444</b>  | 1475.6550        | 738.3311         | 1474.6710      | 737.8391         | F    | 1022.5153       | 511.7613        | 1005.4888      | 503.2480         | 1004.5047      | 502.7560         | 8  |
| 16 | <b>1621.7241</b> | 811.3657         | 1604.6976        | 802.8524         | 1603.7136      | 802.3604         | Q    | <b>875.4469</b> | 438.2271        | 858.4203       | 429.7138         | 857.4363       | 429.2218         | 7  |
| 17 | <b>1734.8082</b> | 867.9077         | 1717.7816        | 859.3945         | 1716.7976      | 858.9025         | L    | <b>746.4043</b> | 373.7058        | 729.3777       | 365.1925         | 728.3937       | 364.7005         | 6  |
| 18 | <b>1863.8508</b> | 932.4290         | 1846.8242        | 923.9158         | 1845.8402      | 923.4237         | E    | <b>633.3202</b> | 317.1638        | 616.2937       | 308.6505         | 615.3097       | 308.1585         | 5  |
| 19 | 1992.8934        | 996.9503         | <b>1975.8668</b> | 988.4371         | 1974.8828      | 987.9450         | E    | <b>504.2776</b> | 252.6425        | 487.2511       | 244.1292         | 486.2671       | 243.6372         | 4  |
| 20 | 2105.9774        | <b>1053.4924</b> | 2088.9509        | 1044.9791        | 2087.9669      | 1044.4871        | I    | <b>375.2350</b> | 188.1212        | 358.2085       | 179.6079         | 357.2245       | 179.1159         | 3  |
| 21 | 2193.0095        | 1097.0084        | 2175.9829        | 1088.4951        | 2174.9989      | 1088.0031        | S    | <b>262.1510</b> | 131.5791        | 245.1244       | 123.0659         | 244.1404       | 122.5738         | 2  |
| 22 |                  |                  |                  |                  |                |                  | R    | 175.1190        | 88.0631         | 158.0924       | 79.5498          |                |                  | 1  |

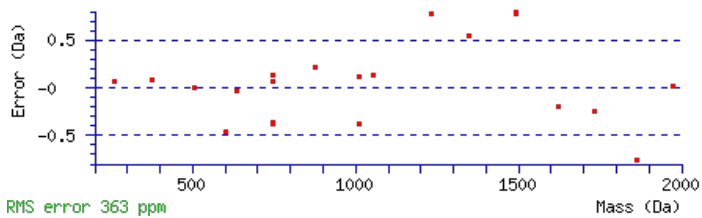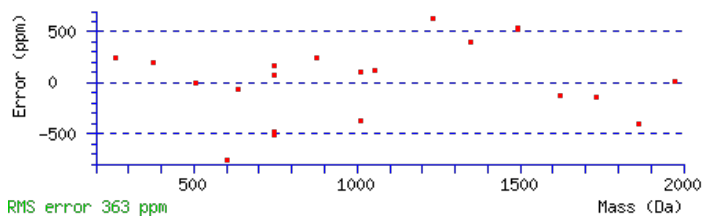

NCBI BLAST search of [AALAAFNAQNNGSNFQLEEISR](#)

(Parameters: blastp, nr protein database, expect=20000, no filter, PAM30)

Other BLAST [web gateways](#)

All matches to this query

| Score | Mr(calc)  | Delta  | Sequence                               | Site Analysis              |
|-------|-----------|--------|----------------------------------------|----------------------------|
| 51.3  | 2366.1138 | 0.0040 | <a href="#">AALAAFNAQNNGSNFQLEEISR</a> | Deamidated N11, Q16 19.46% |
| 51.3  | 2366.1138 | 0.0040 | <a href="#">AALAAFNAQNNGSNFQLEEISR</a> | Deamidated N10, Q16 19.46% |
| 51.3  | 2366.1138 | 0.0040 | <a href="#">AALAAFNAQNNGSNFQLEEISR</a> | Deamidated Q9, Q16 19.46%  |
| 51.3  | 2366.1138 | 0.0040 | <a href="#">AALAAFNAQNNGSNFQLEEISR</a> | Deamidated N7, Q16 19.46%  |
| 45.0  | 2366.1138 | 0.0040 | <a href="#">AALAAFNAQNNGSNFQLEEISR</a> | Deamidated N10, N11 4.57%  |
| 44.2  | 2366.1138 | 0.0040 | <a href="#">AALAAFNAQNNGSNFQLEEISR</a> | Deamidated N10, N14 3.82%  |
| 43.6  | 2366.1138 | 0.0040 | <a href="#">AALAAFNAQNNGSNFQLEEISR</a> | Deamidated N11, N14 3.30%  |
| 41.8  | 2366.1138 | 0.0040 | <a href="#">AALAAFNAQNNGSNFQLEEISR</a> | Deamidated N14, Q16 2.16%  |
| 39.9  | 2366.1138 | 0.0040 | <a href="#">AALAAFNAQNNGSNFQLEEISR</a> | Deamidated Q9, N14 1.39%   |
| 39.9  | 2366.1138 | 0.0040 | <a href="#">AALAAFNAQNNGSNFQLEEISR</a> | Deamidated Q9, N11 1.39%   |

Mascot: <http://www.matrixscience.com/>

# MATRIX SCIENCE Mascot Search Results

## Peptide View

MS/MS Fragmentation of **DSVSVVLGQHFFNR**

Found in **D6RAR4** in **con\_Xuniprot\_HUMAN3**, D6RAR4\_HUMAN Hepatocyte growth factor activator OS=Homo sapiens GN=HGFAFAC PE=2 SV=1

Match to Query 7673: 1604.800368 from(803.407460,2+) intensity(68037.2266) rtinseconds(1707) scans(4384) index(2753)

Title: 111019\_Est\_ISCardio\_NMI\_YP\_G\_5Spectrum3711\_scans\_\_4384

Data file C:\mascot\20140703\_Tmgf\_1D\CSV\_UseAnalysis\MasterCSV\All\_Glyco\mgf\ptm\UC18ERLIC\_PTM\_35D.mgf

Click mouse within plot area to zoom in by factor of two about that point

Or, to Da

Label all possible matches Label matches used for scoring

Show Y-axis

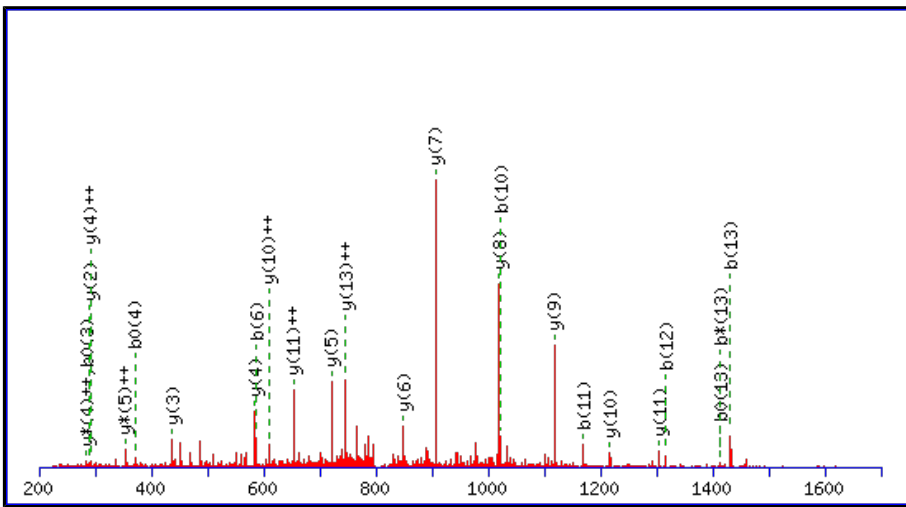

Monoisotopic mass of neutral peptide  $M_r(\text{calc})$ : 1604.7947

Fixed modifications: Carbamidomethyl (C) (apply to specified residues or termini only)

Variable modifications:

N13 : Deamidated (NQ)

Ions Score: 67 Expect: 5.3e-005

Matches : 25/120 fragment ions using 42 most intense peaks ([help](#))

| #  | b         | b <sup>++</sup> | b <sup>*</sup> | b <sup>***</sup> | b <sup>0</sup> | b <sup>0++</sup> | Seq. | y         | y <sup>++</sup> | y <sup>*</sup> | y <sup>***</sup> | y <sup>0</sup> | y <sup>0++</sup> | #  |
|----|-----------|-----------------|----------------|------------------|----------------|------------------|------|-----------|-----------------|----------------|------------------|----------------|------------------|----|
| 1  | 116.0342  | 58.5207         |                |                  | 98.0237        | 49.5155          | D    |           |                 |                |                  |                |                  | 14 |
| 2  | 203.0662  | 102.0368        |                |                  | 185.0557       | 93.0315          | S    | 1490.7750 | 745.8912        | 1473.7485      | 737.3779         | 1472.7645      | 736.8859         | 13 |
| 3  | 302.1347  | 151.5710        |                |                  | 284.1241       | 142.5657         | V    | 1403.7430 | 702.3751        | 1386.7165      | 693.8619         | 1385.7324      | 693.3699         | 12 |
| 4  | 389.1667  | 195.0870        |                |                  | 371.1561       | 186.0817         | S    | 1304.6746 | 652.8409        | 1287.6480      | 644.3277         | 1286.6640      | 643.8357         | 11 |
| 5  | 488.2351  | 244.6212        |                |                  | 470.2245       | 235.6159         | V    | 1217.6426 | 609.3249        | 1200.6160      | 600.8116         |                |                  | 10 |
| 6  | 587.3035  | 294.1554        |                |                  | 569.2930       | 285.1501         | V    | 1118.5742 | 559.7907        | 1101.5476      | 551.2774         |                |                  | 9  |
| 7  | 700.3876  | 350.6974        |                |                  | 682.3770       | 341.6921         | L    | 1019.5057 | 510.2565        | 1002.4792      | 501.7432         |                |                  | 8  |
| 8  | 757.4090  | 379.2082        |                |                  | 739.3985       | 370.2029         | G    | 906.4217  | 453.7145        | 889.3951       | 445.2012         |                |                  | 7  |
| 9  | 885.4676  | 443.2374        | 868.4411       | 434.7242         | 867.4571       | 434.2322         | Q    | 849.4002  | 425.2037        | 832.3737       | 416.6905         |                |                  | 6  |
| 10 | 1022.5265 | 511.7669        | 1005.5000      | 503.2536         | 1004.5160      | 502.7616         | H    | 721.3416  | 361.1745        | 704.3151       | 352.6612         |                |                  | 5  |
| 11 | 1169.5949 | 585.3011        | 1152.5684      | 576.7878         | 1151.5844      | 576.2958         | F    | 584.2827  | 292.6450        | 567.2562       | 284.1317         |                |                  | 4  |
| 12 | 1316.6634 | 658.8353        | 1299.6368      | 650.3220         | 1298.6528      | 649.8300         | F    | 437.2143  | 219.1108        | 420.1878       | 210.5975         |                |                  | 3  |
| 13 | 1431.6903 | 716.3488        | 1414.6638      | 707.8355         | 1413.6797      | 707.3435         | N    | 290.1459  | 145.5766        | 273.1193       | 137.0633         |                |                  | 2  |
| 14 |           |                 |                |                  |                |                  | R    | 175.1190  | 88.0631         | 158.0924       | 79.5498          |                |                  | 1  |



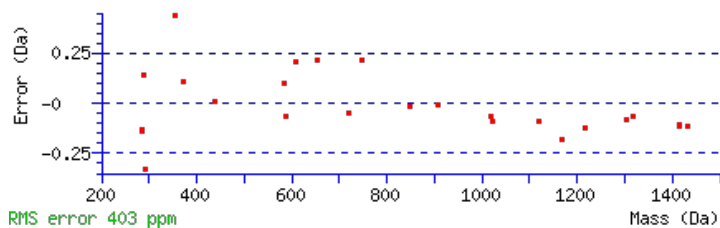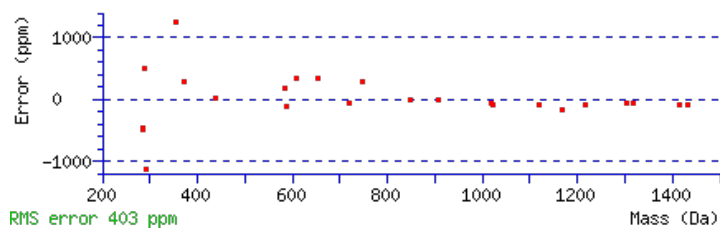

NCBI BLAST search of [DSVSVVLGQHFFNR](#)

(Parameters: blastp, nr protein database, expect=20000, no filter, PAM30)

Other BLAST [web gateways](#)

All matches to this query

| Score | Mr(calc)  | Delta   | Sequence                          | Site Analysis         |
|-------|-----------|---------|-----------------------------------|-----------------------|
| 66.8  | 1604.7947 | 0.0056  | <a href="#">DSVSVVLGQHFFNR</a>    | Deamidated N13 99.96% |
| 32.5  | 1604.7947 | 0.0056  | <a href="#">DSVSVVLGQHFFNR</a>    | Deamidated Q9 0.04%   |
| 7.5   | 1604.8021 | -0.0017 | <a href="#">WDNGLLSHYMKLK</a>     |                       |
| 4.4   | 1604.7940 | 0.0064  | <a href="#">RVNNTDEMARLIR</a>     |                       |
| 3.9   | 1603.7954 | 1.0049  | <a href="#">EPQATGPHGGTSPLQK</a>  |                       |
| 3.2   | 1604.8046 | -0.0042 | <a href="#">GPAAGQTFTAVDTALGK</a> |                       |
| 1.8   | 1604.8079 | -0.0076 | <a href="#">SSLGKNLQVPMSESK</a>   |                       |
| 1.7   | 1604.8046 | -0.0042 | <a href="#">LGESVTQFVEPKR</a>     |                       |
| 1.6   | 1603.8028 | 0.9976  | <a href="#">LGSLNLRWQEVCK</a>     |                       |
| 1.4   | 1604.8080 | -0.0076 | <a href="#">LIATMGDTVTTDVPR</a>   |                       |

Mascot: <http://www.matrixscience.com/>

# MATRIX SCIENCE Mascot Search Results

## Peptide View

MS/MS Fragmentation of **ENISDPTSPLR**

Found in **D6RD17** in **con\_Xuniprot\_HUMAN3**, D6RD17\_HUMAN Immunoglobulin J chain (Fragment) OS=Homo sapiens GN=IGJ PE=2 SV=1

Match to Query 1702: 1228.594768 from(615.304660,2+) intensity(411029.7500) rtinseconds(673) scans(1423) index(1898)

Title: 111019\_Est\_ISCardio\_NMI\_YP\_G\_4Spectrum1172\_scans\_\_1423

Data file C:\\mascot\\20140703\_Tmgf\_1D\\CSV\_UseAnalysis\\MasterCSV\\All\_Glyco\\mgf\\ptm\\UC18ERLIC\_PTM\_35D.mgf

Click mouse within plot area to zoom in by factor of two about that point

Or, to Da

Label all possible matches Label matches used for scoring

Show Y-axis

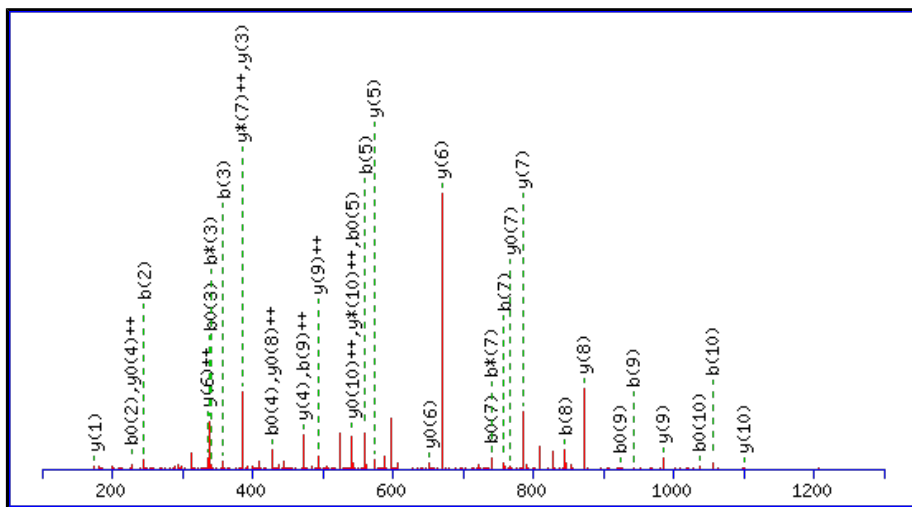

Monoisotopic mass of neutral peptide Mr(calc): 1228.5935

Fixed modifications: Carbamidomethyl (C) (apply to specified residues or termini only)

Variable modifications:

N2 : Deamidated (NQ)

Ions Score: 60 Expect: 0.00014

Matches : 35/112 fragment ions using 49 most intense peaks ([help](#))

| #  | b                | b <sup>++</sup> | b <sup>*</sup>  | b <sup>***</sup> | b <sup>0</sup>   | b <sup>0++</sup> | Seq. | y                | y <sup>++</sup> | y <sup>*</sup> | y <sup>***</sup> | y <sup>0</sup>  | y <sup>0++</sup> | #  |
|----|------------------|-----------------|-----------------|------------------|------------------|------------------|------|------------------|-----------------|----------------|------------------|-----------------|------------------|----|
| 1  | 130.0499         | 65.5286         |                 |                  | 112.0393         | 56.5233          | E    |                  |                 |                |                  |                 |                  | 11 |
| 2  | <b>245.0768</b>  | 123.0420        | 228.0503        | 114.5288         | <b>227.0662</b>  | 114.0368         | N    | <b>1100.5582</b> | 550.7828        | 1083.5317      | <b>542.2695</b>  | 1082.5477       | <b>541.7775</b>  | 10 |
| 3  | <b>358.1609</b>  | 179.5841        | <b>341.1343</b> | 171.0708         | <b>340.1503</b>  | 170.5788         | I    | <b>985.5313</b>  | <b>493.2693</b> | 968.5047       | 484.7560         | 967.5207        | 484.2640         | 9  |
| 4  | 445.1929         | 223.1001        | 428.1664        | 214.5868         | <b>427.1823</b>  | 214.0948         | S    | <b>872.4472</b>  | 436.7272        | 855.4207       | 428.2140         | 854.4367        | <b>427.7220</b>  | 8  |
| 5  | <b>560.2198</b>  | 280.6136        | 543.1933        | 272.1003         | <b>542.2093</b>  | 271.6083         | D    | <b>785.4152</b>  | 393.2112        | 768.3886       | <b>384.6980</b>  | <b>767.4046</b> | 384.2060         | 7  |
| 6  | 657.2726         | 329.1399        | 640.2461        | 320.6267         | 639.2620         | 320.1347         | P    | <b>670.3883</b>  | <b>335.6978</b> | 653.3617       | 327.1845         | <b>652.3777</b> | 326.6925         | 6  |
| 7  | <b>758.3203</b>  | 379.6638        | <b>741.2937</b> | 371.1505         | <b>740.3097</b>  | 370.6585         | T    | <b>573.3355</b>  | 287.1714        | 556.3089       | 278.6581         | 555.3249        | 278.1661         | 5  |
| 8  | <b>845.3523</b>  | 423.1798        | 828.3258        | 414.6665         | 827.3418         | 414.1745         | S    | <b>472.2878</b>  | 236.6475        | 455.2613       | 228.1343         | 454.2772        | <b>227.6423</b>  | 4  |
| 9  | <b>942.4051</b>  | <b>471.7062</b> | 925.3785        | 463.1929         | <b>924.3945</b>  | 462.7009         | P    | <b>385.2558</b>  | 193.1315        | 368.2292       | 184.6183         |                 |                  | 3  |
| 10 | <b>1055.4891</b> | 528.2482        | 1038.4626       | 519.7349         | <b>1037.4786</b> | 519.2429         | L    | 288.2030         | 144.6051        | 271.1765       | 136.0919         |                 |                  | 2  |
| 11 |                  |                 |                 |                  |                  |                  | R    | <b>175.1190</b>  | 88.0631         | 158.0924       | 79.5498          |                 |                  | 1  |

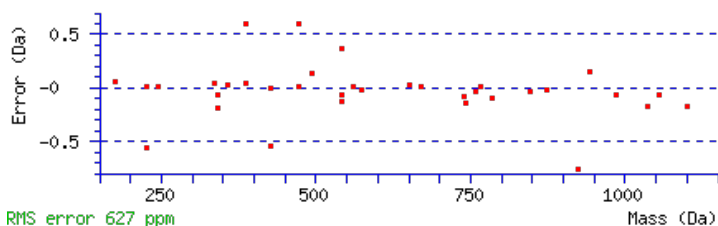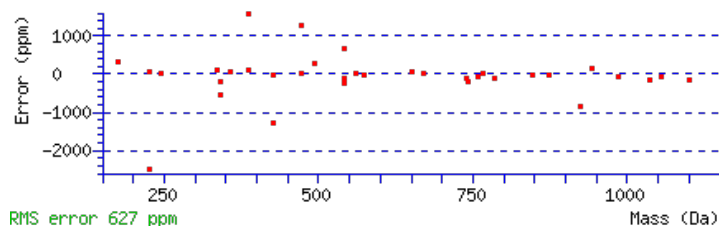

NCBI BLAST search of [ENISDPTSPLR](#)

(Parameters: blastp, nr protein database, expect=20000, no filter, PAM30)

Other BLAST [web gateways](#)

**All matches to this query**

| Score | Mr(calc)  | Delta  | Sequence                    |
|-------|-----------|--------|-----------------------------|
| 59.9  | 1228.5935 | 0.0012 | <a href="#">ENISDPTSPLR</a> |
| 20.4  | 1227.5956 | 0.9992 | <a href="#">QGGDSNQRPLR</a> |
| 14.1  | 1228.5908 | 0.0039 | <a href="#">QNDAQLDRNR</a>  |
| 10.8  | 1227.5956 | 0.9992 | <a href="#">QGGDSNQRPLR</a> |
| 6.0   | 1226.5931 | 2.0016 | <a href="#">PKQSVYDAYR</a>  |
| 2.5   | 1228.5935 | 0.0013 | <a href="#">SAEAERQVLEP</a> |
| 1.4   | 1227.5879 | 1.0069 | <a href="#">LQLNMSEVMK</a>  |
| 0.8   | 1228.5908 | 0.0039 | <a href="#">QROQQQQQR</a>   |
| 0.2   | 1228.5908 | 0.0039 | <a href="#">RQEQQQQQR</a>   |
| 0.2   | 1228.5908 | 0.0039 | <a href="#">RQEQQQQQR</a>   |

**Mascot:** <http://www.matrixscience.com/>

# MATRIX SCIENCE Mascot Search Results

## Peptide View

MS/MS Fragmentation of **IVPLNRENISDPTSPLR**

Found in **D6RD17** in **con\_Xuniprot\_HUMAN3**, D6RD17\_HUMAN Immunoglobulin J chain (Fragment) OS=Homo sapiens GN=IGJ PE=2 SV=1

Match to Query 14393: 2148.155352 from(717.059060,3+) intensity(2950954.5000) rtinseconds(1395) scans(3207) index(15098)  
 Title: 111019\_Est\_MI\_YP\_G\_04Spectrum2731\_scans\_\_3207  
 Data file C:\mascot\20140703\_Tmgf\_1D\CSV\_UseAnalysis\MasterCSV\All\_Glyco\mgf\ptm\UC18ERLIC\_PTM\_35D.mgf

Click mouse within plot area to zoom in by factor of two about that point

Or, to Da  
 Label all possible matches Label matches used for scoring  
 Show Y-axis

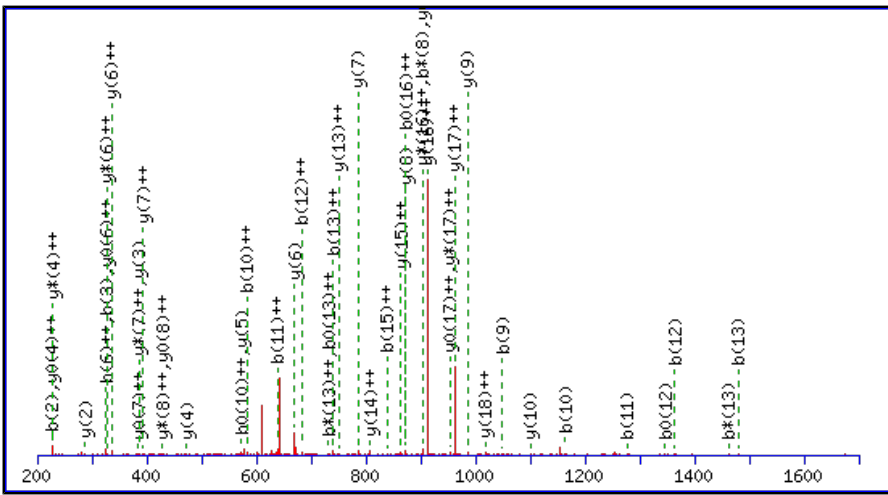

Monoisotopic mass of neutral peptide **Mr(calc): 2148.1538**  
 Fixed modifications: Carbamidomethyl (C) (apply to specified residues or termini only)  
 Variable modifications:  
 N10 : Deamidated (NQ)  
 Ions Score: 52 Expect: 0.00089  
 Matches : 49/184 fragment ions using 88 most intense peaks ([help](#))

| #  | b                | b <sup>++</sup> | b*               | b <sup>*++</sup> | b <sup>0</sup>   | b <sup>0++</sup> | Seq. | y                | y <sup>++</sup>  | y*        | y <sup>*++</sup> | y <sup>0</sup> | y <sup>0++</sup> | #  |
|----|------------------|-----------------|------------------|------------------|------------------|------------------|------|------------------|------------------|-----------|------------------|----------------|------------------|----|
| 1  | 114.0913         | 57.5493         |                  |                  |                  |                  | I    |                  |                  |           |                  |                |                  | 19 |
| 2  | <b>227.1754</b>  | 114.0913        |                  |                  |                  |                  | I    | 2036.0771        | <b>1018.5422</b> | 2019.0505 | 1010.0289        | 2018.0665      | 1009.5369        | 18 |
| 3  | <b>326.2438</b>  | 163.6255        |                  |                  |                  |                  | V    | 1922.9930        | <b>962.0002</b>  | 1905.9665 | <b>953.4869</b>  | 1904.9825      | <b>952.9949</b>  | 17 |
| 4  | 423.2966         | 212.1519        |                  |                  |                  |                  | P    | 1823.9246        | <b>912.4659</b>  | 1806.8981 | <b>903.9527</b>  | 1805.9141      | <b>903.4607</b>  | 16 |
| 5  | 536.3806         | 268.6940        |                  |                  |                  |                  | L    | 1726.8719        | <b>863.9396</b>  | 1709.8453 | 855.4263         | 1708.8613      | 854.9343         | 15 |
| 6  | 650.4236         | <b>325.7154</b> | 633.3970         | 317.2022         |                  |                  | N    | 1613.7878        | <b>807.3975</b>  | 1596.7612 | 798.8843         | 1595.7772      | 798.3922         | 14 |
| 7  | 764.4665         | 382.7369        | 747.4400         | 374.2236         |                  |                  | N    | 1499.7449        | <b>750.3761</b>  | 1482.7183 | 741.8628         | 1481.7343      | 741.3708         | 13 |
| 8  | 920.5676         | 460.7874        | <b>903.5411</b>  | 452.2742         |                  |                  | R    | 1385.7019        | 693.3546         | 1368.6754 | 684.8413         | 1367.6914      | 684.3493         | 12 |
| 9  | <b>1049.6102</b> | 525.3087        | 1032.5837        | 516.7955         | 1031.5996        | 516.3035         | E    | 1229.6008        | 615.3040         | 1212.5743 | 606.7908         | 1211.5903      | 606.2988         | 11 |
| 10 | <b>1164.6371</b> | <b>582.8222</b> | 1147.6106        | 574.3089         | 1146.6266        | <b>573.8169</b>  | N    | <b>1100.5582</b> | 550.7828         | 1083.5317 | 542.2695         | 1082.5477      | 541.7775         | 10 |
| 11 | <b>1277.7212</b> | <b>639.3642</b> | 1260.6947        | 630.8510         | 1259.7106        | 630.3590         | I    | <b>985.5313</b>  | 493.2693         | 968.5047  | 484.7560         | 967.5207       | 484.2640         | 9  |
| 12 | <b>1364.7532</b> | <b>682.8803</b> | 1347.7267        | 674.3670         | <b>1346.7427</b> | 673.8750         | S    | <b>872.4472</b>  | 436.7272         | 855.4207  | <b>428.2140</b>  | 854.4367       | <b>427.7220</b>  | 8  |
| 13 | <b>1479.7802</b> | <b>740.3937</b> | <b>1462.7536</b> | <b>731.8805</b>  | 1461.7696        | <b>731.3884</b>  | D    | <b>785.4152</b>  | <b>393.2112</b>  | 768.3886  | <b>384.6980</b>  | 767.4046       | <b>384.2060</b>  | 7  |
| 14 | 1576.8329        | 788.9201        | 1559.8064        | 780.4068         | 1558.8224        | 779.9148         | P    | <b>670.3883</b>  | <b>335.6978</b>  | 653.3617  | <b>327.1845</b>  | 652.3777       | <b>326.6925</b>  | 6  |
| 15 | 1677.8806        | <b>839.4440</b> | 1660.8541        | 830.9307         | 1659.8701        | 830.4387         | T    | <b>573.3355</b>  | 287.1714         | 556.3089  | 278.6581         | 555.3249       | 278.1661         | 5  |
| 16 | 1764.9127        | 882.9600        | 1747.8861        | 874.4467         | 1746.9021        | <b>873.9547</b>  | S    | <b>472.2878</b>  | 236.6475         | 455.2613  | <b>228.1343</b>  | 454.2772       | <b>227.6423</b>  | 4  |
| 17 | 1861.9654        | 931.4863        | 1844.9389        | 922.9731         | 1843.9549        | 922.4811         | P    | <b>385.2558</b>  | 193.1315         | 368.2292  | 184.6183         |                |                  | 3  |
| 18 | 1975.0495        | 988.0284        | 1958.0229        | 979.5151         | 1957.0389        | 979.0231         | L    | <b>288.2030</b>  | 144.6051         | 271.1765  | 136.0919         |                |                  | 2  |
| 19 |                  |                 |                  |                  |                  |                  | R    | 175.1190         | 88.0631          | 158.0924  | 79.5498          |                |                  | 1  |

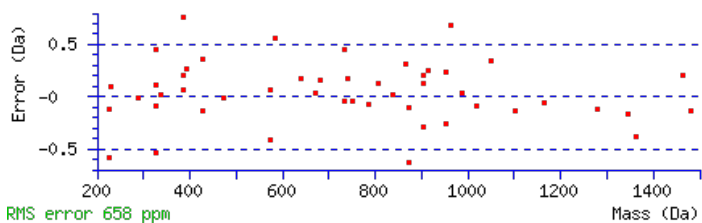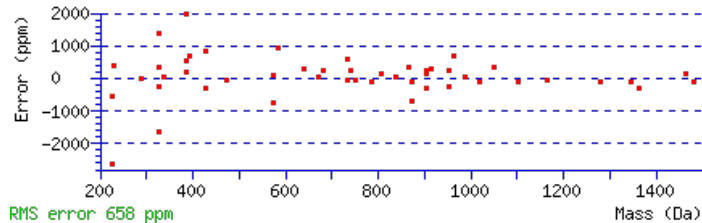

NCBI BLAST search of [IIVPLNNRENISDPTSPLR](#)

(Parameters: blastp, nr protein database, expect=20000, no filter, PAM30)

Other BLAST [web gateways](#)

All matches to this query

| Score | Mr(calcd) | Delta   | Sequence                              | Site Analysis         |
|-------|-----------|---------|---------------------------------------|-----------------------|
| 52.0  | 2148.1538 | 0.0015  | <a href="#">IIVPLNNRENISDPTSPLR</a>   | Deamidated N10 71.08% |
| 45.0  | 2148.1538 | 0.0015  | <a href="#">IIVPLNNRENISDPTSPLR</a>   | Deamidated N6 14.48%  |
| 45.0  | 2148.1538 | 0.0015  | <a href="#">IIVPLNNRENISDPTSPLR</a>   | Deamidated N7 14.45%  |
| 9.9   | 2146.1494 | 2.0060  | <a href="#">KPPARPSAAAAAIAVAAAEER</a> |                       |
| 8.1   | 2147.1473 | 1.0080  | <a href="#">LLDHKQEEPASTKAEPLK</a>    |                       |
| 6.6   | 2148.1547 | 0.0006  | <a href="#">IMCIHTRLVIALALQDK</a>     |                       |
| 6.3   | 2148.1554 | -0.0000 | <a href="#">IIVGSFMGYLRIFSPHPAK</a>   |                       |
| 5.3   | 2147.1586 | 0.9968  | <a href="#">EPPQTELALEDASLLPRR</a>    |                       |
| 4.7   | 2146.1416 | 2.0138  | <a href="#">LQALRSLSGTPKSMTLSR</a>    |                       |
| 4.5   | 2148.1552 | 0.0002  | <a href="#">ATGPGPROYLRIIGEDHLR</a>   |                       |

Mascot: <http://www.matrixscience.com/>

# MASCOT SCIENCE Mascot Search Results

## Peptide View

MS/MS Fragmentation of **ENISDPTSPLRTR**

Found in **D6RD17** in **con\_Xuniprot\_HUMAN3**, D6RD17\_HUMAN Immunoglobulin J chain (Fragment) OS=Homo sapiens GN=IGJ PE=2 SV=1

Match to Query 6679: 1485.743382 from(496.255070,3+) intensity(31670.5918) rtinseconds(579) scans(923) index(169)

Title: 111019\_Est\_ISCardio\_NMI\_200000g\_G\_5Spectrum720\_scans\_923

Data file C:\mascot\20140703\_Tmgf\_1D\CSV\_UseAnalysis\MasterCSV\All\_Glyco\mgf\ptm\UC18ERLIC\_PTM\_35D.mgf

Click mouse within plot area to zoom in by factor of two about that point

Or, to Da

Label all possible matches Label matches used for scoring

Show Y-axis

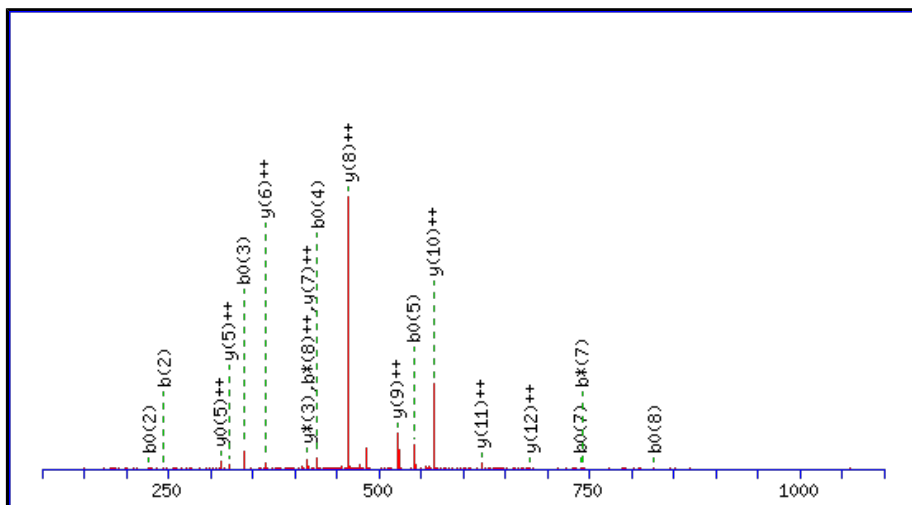

Monoisotopic mass of neutral peptide **Mr(calc)**: 1485.7423

Fixed modifications: Carbamidomethyl (C) (apply to specified residues or termini only)

Variable modifications:

N2 : Deamidated (NQ)

Ions Score: 42 Expect: 0.012

Matches : 19/140 fragment ions using 24 most intense peaks ([help](#))

| #  | b         | b <sup>++</sup> | b <sup>*</sup> | b <sup>***</sup> | b <sup>0</sup> | b <sup>0++</sup> | Seq. | y         | y <sup>++</sup> | y <sup>*</sup> | y <sup>***</sup> | y <sup>0</sup> | y <sup>0++</sup> | #  |
|----|-----------|-----------------|----------------|------------------|----------------|------------------|------|-----------|-----------------|----------------|------------------|----------------|------------------|----|
| 1  | 130.0499  | 65.5286         |                |                  | 112.0393       | 56.5233          | E    |           |                 |                |                  |                |                  | 13 |
| 2  | 245.0768  | 123.0420        | 228.0503       | 114.5288         | 227.0662       | 114.0368         | N    | 1357.7070 | 679.3571        | 1340.6805      | 670.8439         | 1339.6965      | 670.3519         | 12 |
| 3  | 358.1609  | 179.5841        | 341.1343       | 171.0708         | 340.1503       | 170.5788         | I    | 1242.6801 | 621.8437        | 1225.6535      | 613.3304         | 1224.6695      | 612.8384         | 11 |
| 4  | 445.1929  | 223.1001        | 428.1664       | 214.5868         | 427.1823       | 214.0948         | S    | 1129.5960 | 565.3016        | 1112.5695      | 556.7884         | 1111.5854      | 556.2964         | 10 |
| 5  | 560.2198  | 280.6136        | 543.1933       | 272.1003         | 542.2093       | 271.6083         | D    | 1042.5640 | 521.7856        | 1025.5374      | 513.2724         | 1024.5534      | 512.7803         | 9  |
| 6  | 657.2726  | 329.1399        | 640.2461       | 320.6267         | 639.2620       | 320.1347         | P    | 927.5370  | 464.2722        | 910.5105       | 455.7589         | 909.5265       | 455.2669         | 8  |
| 7  | 758.3203  | 379.6638        | 741.2937       | 371.1505         | 740.3097       | 370.6585         | T    | 830.4843  | 415.7458        | 813.4577       | 407.2325         | 812.4737       | 406.7405         | 7  |
| 8  | 845.3523  | 423.1798        | 828.3258       | 414.6665         | 827.3418       | 414.1745         | S    | 729.4366  | 365.2219        | 712.4100       | 356.7087         | 711.4260       | 356.2167         | 6  |
| 9  | 942.4051  | 471.7062        | 925.3785       | 463.1929         | 924.3945       | 462.7009         | P    | 642.4046  | 321.7059        | 625.3780       | 313.1926         | 624.3940       | 312.7006         | 5  |
| 10 | 1055.4891 | 528.2482        | 1038.4626      | 519.7349         | 1037.4786      | 519.2429         | L    | 545.3518  | 273.1795        | 528.3253       | 264.6663         | 527.3412       | 264.1743         | 4  |
| 11 | 1211.5903 | 606.2988        | 1194.5637      | 597.7855         | 1193.5797      | 597.2935         | R    | 432.2677  | 216.6375        | 415.2412       | 208.1242         | 414.2572       | 207.6322         | 3  |
| 12 | 1312.6379 | 656.8226        | 1295.6114      | 648.3093         | 1294.6274      | 647.8173         | T    | 276.1666  | 138.5870        | 259.1401       | 130.0737         | 258.1561       | 129.5817         | 2  |
| 13 |           |                 |                |                  |                |                  | R    | 175.1190  | 88.0631         | 158.0924       | 79.5498          |                |                  | 1  |

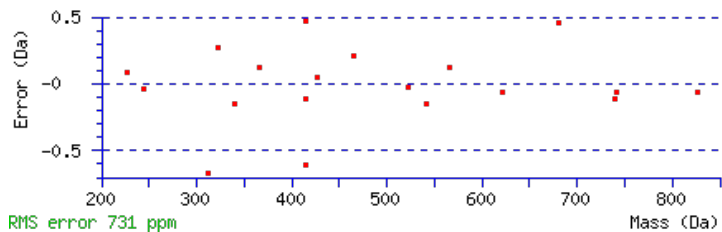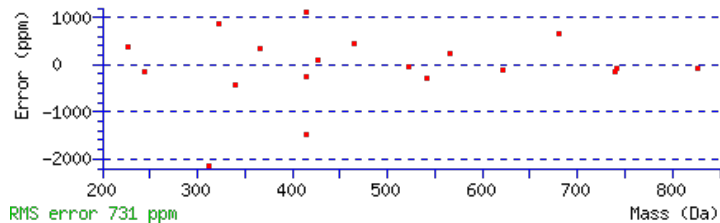

NCBI **BLAST** search of [ENISDPTSPLRTR](#)

(Parameters: blastp, nr protein database, expect=20000, no filter, PAM30)

Other BLAST [web gateways](#)

**All matches to this query**

| Score | Mr(calc)  | Delta   | Sequence                        |
|-------|-----------|---------|---------------------------------|
| 42.2  | 1485.7423 | 0.0011  | <a href="#">ENISDPTSPLRTR</a>   |
| 8.5   | 1483.7381 | 2.0053  | <a href="#">KILGMFTSQQWK</a>    |
| 7.6   | 1485.7423 | 0.0011  | <a href="#">NSLGADDGVAEVLAR</a> |
| 7.1   | 1485.7365 | 0.0069  | <a href="#">RDLHFAQGQWVK</a>    |
| 5.2   | 1483.7340 | 2.0093  | <a href="#">ELNAEPSQMQIPK</a>   |
| 4.8   | 1485.7423 | 0.0011  | <a href="#">QIANEIPVSSNRR</a>   |
| 4.8   | 1485.7423 | 0.0011  | <a href="#">QLEDAVEQIRER</a>    |
| 4.8   | 1484.7372 | 1.0062  | <a href="#">HPGATTGLFVSAGDR</a> |
| 4.7   | 1485.7497 | -0.0063 | <a href="#">AKEEQPLOAMIAR</a>   |
| 4.7   | 1485.7497 | -0.0063 | <a href="#">AKQEQPLOAMIAR</a>   |

Mascot: <http://www.matrixscience.com/>



# MATRIX SCIENCE Mascot Search Results

## Peptide View

MS/MS Fragmentation of **EGYSNISYIVVNHQGISSR**

Found in **D6REX5** in **con\_Xuniprot\_HUMAN3**, D6REX5\_HUMAN Selenoprotein P (Fragment) OS=Homo sapiens GN=SEPP1 PE=4 SV=1

Match to Query 14104: 2123.038908 from(1062.526730,2+) intensity(59457.2383) rtinseconds(1763) scans(4042) index(16790)

Title: 111019\_Est\_MI\_YP\_G\_06Spectrum3359\_scans\_4042

Data file C:\\mascot\\20140703\_Tmgf\_1D\\CSV\_UseAnalysis\\MasterCSV\\All\_Glyco\\mgf\\ptm\\UC18ERLIC\_PTM\_35D.mgf

Click mouse within plot area to zoom in by factor of two about that point

Or, to Da

Label all possible matches Label matches used for scoring

Show Y-axis

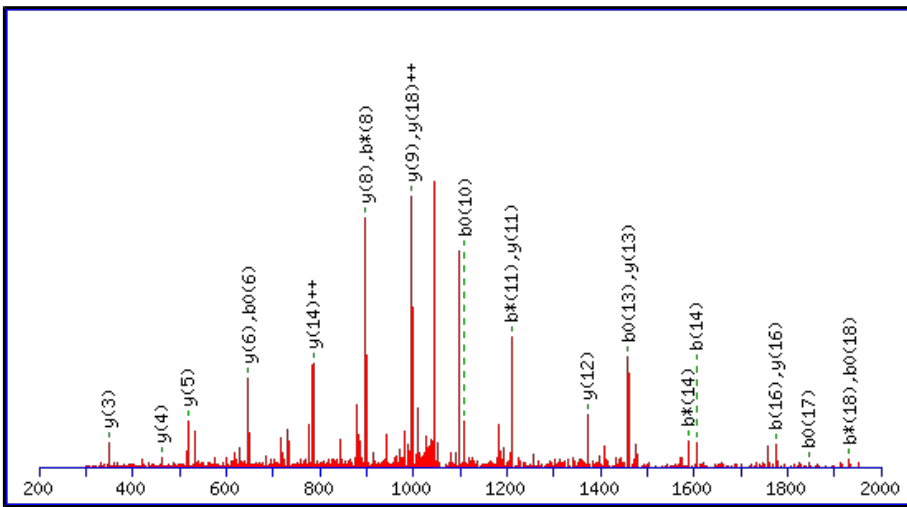

Monoisotopic mass of neutral peptide Mr(calc): 2123.0283

Fixed modifications: Carbamidomethyl (C) (apply to specified residues or termini only)

Variable modifications:

N5 : Deamidated (NQ)

Ions Score: 98 Expect: 4e-008

Matches : 23/206 fragment ions using 17 most intense peaks ([help](#))

| #  | b         | b <sup>++</sup> | b <sup>*</sup> | b <sup>*++</sup> | b <sup>0</sup> | b <sup>0++</sup> | Seq. | y         | y <sup>++</sup> | y <sup>*</sup> | y <sup>*++</sup> | y <sup>0</sup> | y <sup>0++</sup> | #  |
|----|-----------|-----------------|----------------|------------------|----------------|------------------|------|-----------|-----------------|----------------|------------------|----------------|------------------|----|
| 1  | 130.0499  | 65.5286         |                |                  | 112.0393       | 56.5233          | E    |           |                 |                |                  |                |                  | 19 |
| 2  | 187.0713  | 94.0393         |                |                  | 169.0608       | 85.0340          | G    | 1994.9930 | 998.0002        | 1977.9665      | 989.4869         | 1976.9825      | 988.9949         | 18 |
| 3  | 350.1347  | 175.5710        |                |                  | 332.1241       | 166.5657         | Y    | 1937.9716 | 969.4894        | 1920.9450      | 960.9761         | 1919.9610      | 960.4841         | 17 |
| 4  | 437.1667  | 219.0870        |                |                  | 419.1561       | 210.0817         | S    | 1774.9082 | 887.9578        | 1757.8817      | 879.4445         | 1756.8977      | 878.9525         | 16 |
| 5  | 552.1936  | 276.6005        | 535.1671       | 268.0872         | 534.1831       | 267.5952         | N    | 1687.8762 | 844.4417        | 1670.8497      | 835.9285         | 1669.8656      | 835.4365         | 15 |
| 6  | 665.2777  | 333.1425        | 648.2511       | 324.6292         | 647.2671       | 324.1372         | I    | 1572.8493 | 786.9283        | 1555.8227      | 778.4150         | 1554.8387      | 777.9230         | 14 |
| 7  | 752.3097  | 376.6585        | 735.2832       | 368.1452         | 734.2992       | 367.6532         | S    | 1459.7652 | 730.3862        | 1442.7387      | 721.8730         | 1441.7546      | 721.3810         | 13 |
| 8  | 915.3731  | 458.1902        | 898.3465       | 449.6769         | 897.3625       | 449.1849         | Y    | 1372.7332 | 686.8702        | 1355.7066      | 678.3570         | 1354.7226      | 677.8649         | 12 |
| 9  | 1028.4571 | 514.7322        | 1011.4306      | 506.2189         | 1010.4466      | 505.7269         | I    | 1209.6698 | 605.3386        | 1192.6433      | 596.8253         | 1191.6593      | 596.3333         | 11 |
| 10 | 1127.5255 | 564.2664        | 1110.4990      | 555.7531         | 1109.5150      | 555.2611         | V    | 1096.5858 | 548.7965        | 1079.5592      | 540.2833         | 1078.5752      | 539.7912         | 10 |
| 11 | 1226.5939 | 613.8006        | 1209.5674      | 605.2873         | 1208.5834      | 604.7953         | V    | 997.5174  | 499.2623        | 980.4908       | 490.7490         | 979.5068       | 490.2570         | 9  |
| 12 | 1340.6369 | 670.8221        | 1323.6103      | 662.3088         | 1322.6263      | 661.8168         | N    | 898.4490  | 449.7281        | 881.4224       | 441.2148         | 880.4384       | 440.7228         | 8  |
| 13 | 1477.6958 | 739.3515        | 1460.6692      | 730.8383         | 1459.6852      | 730.3462         | H    | 784.4060  | 392.7067        | 767.3795       | 384.1934         | 766.3955       | 383.7014         | 7  |
| 14 | 1605.7544 | 803.3808        | 1588.7278      | 794.8675         | 1587.7438      | 794.3755         | Q    | 647.3471  | 324.1772        | 630.3206       | 315.6639         | 629.3365       | 315.1719         | 6  |
| 15 | 1662.7758 | 831.8916        | 1645.7493      | 823.3783         | 1644.7653      | 822.8863         | G    | 519.2885  | 260.1479        | 502.2620       | 251.6346         | 501.2780       | 251.1426         | 5  |
| 16 | 1775.8599 | 888.4336        | 1758.8333      | 879.9203         | 1757.8493      | 879.4283         | I    | 462.2671  | 231.6372        | 445.2405       | 223.1239         | 444.2565       | 222.6319         | 4  |
| 17 | 1862.8919 | 931.9496        | 1845.8654      | 923.4363         | 1844.8814      | 922.9443         | S    | 349.1830  | 175.0951        | 332.1565       | 166.5819         | 331.1724       | 166.0899         | 3  |
| 18 | 1949.9239 | 975.4656        | 1932.8974      | 966.9523         | 1931.9134      | 966.4603         | S    | 262.1510  | 131.5791        | 245.1244       | 123.0659         | 244.1404       | 122.5738         | 2  |
| 19 |           |                 |                |                  |                |                  | R    | 175.1190  | 88.0631         | 158.0924       | 79.5498          |                |                  | 1  |

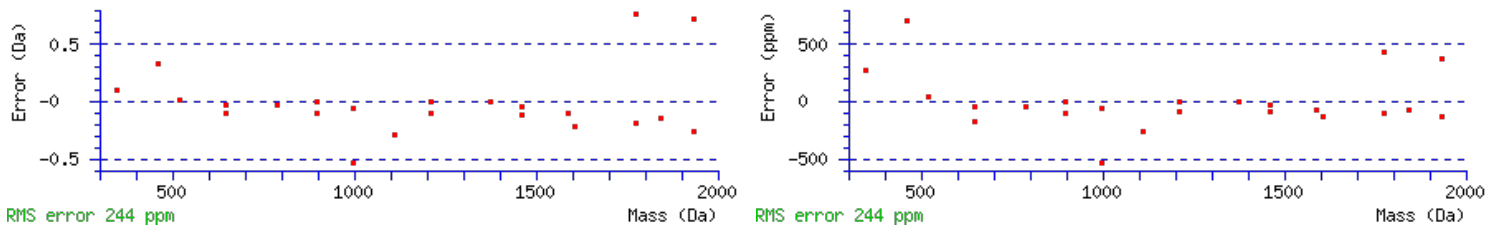

NCBI BLAST search of [EGYSNISYIVVNHQGISSR](#)

(Parameters: blastp, nr protein database, expect=20000, no filter, PAM30)

Other BLAST [web gateways](#)

**All matches to this query**

| Score | Mr(calc)  | Delta   | Sequence                            | Site Analysis        |
|-------|-----------|---------|-------------------------------------|----------------------|
| 98.4  | 2123.0283 | 0.0106  | <a href="#">EGYSNISYIVVNHQGISSR</a> | Deamidated N5 99.87% |
| 79.8  | 2122.0443 | 0.9946  | <a href="#">EGYSNISYIVVNHQGISSR</a> |                      |
| 66.7  | 2123.0283 | 0.0106  | <a href="#">EGYSNISYIVVNHQGISSR</a> | Deamidated N12 0.07% |
| 66.6  | 2123.0283 | 0.0106  | <a href="#">EGYSNISYIVVNHQGISSR</a> | Deamidated Q14 0.07% |
| 6.1   | 2123.0358 | 0.0032  | <a href="#">TDVWSVYIDMTIKHGSQK</a>  |                      |
| 5.4   | 2123.0416 | -0.0027 | <a href="#">AISESQVKNMIQDKVSSDK</a> |                      |
| 5.4   | 2123.0416 | -0.0027 | <a href="#">AISESQVKNMIQDKVSSDK</a> |                      |
| 5.3   | 2123.0416 | -0.0027 | <a href="#">AISESQVKNMIQDKVSSDK</a> |                      |
| 5.1   | 2121.0313 | 2.0076  | <a href="#">EMKEFYHIQIRDLEDR</a>    |                      |
| 3.8   | 2123.0415 | -0.0026 | <a href="#">LTNRTQELESQASKLQMK</a>  |                      |

Mascot: <http://www.matrixscience.com/>

# MASCOT SCIENCE Mascot Search Results

## Peptide View

MS/MS Fragmentation of **VSEHIPVYQEEHQTDVWTLNGSKDDFLIYDR**

Found in **D6REX5** in **con\_Xuniprot\_HUMAN3**, D6REX5\_HUMAN Selenoprotein P (Fragment) OS=Homo sapiens GN=SEPP1 PE=4 SV=1

Match to Query 28193: 3951.881376 from(988.977620,4+) intensity(27047.4414) rtinseconds(2347) scans(6386) index(17856)

Title: 111019\_Est\_MI\_YP\_G\_07Spectrum5520\_scans\_\_6386

Data file C:\mascot\20140703\_Tmgf\_1D\CSV\_UseAnalysis\MasterCSV\All\_Glyco\mgf\ptm\UC18ERLIC\_PTM\_35D.mgf

Click mouse within plot area to zoom in by factor of two about that point

Or, to Da

Label all possible matches Label matches used for scoring

Show Y-axis

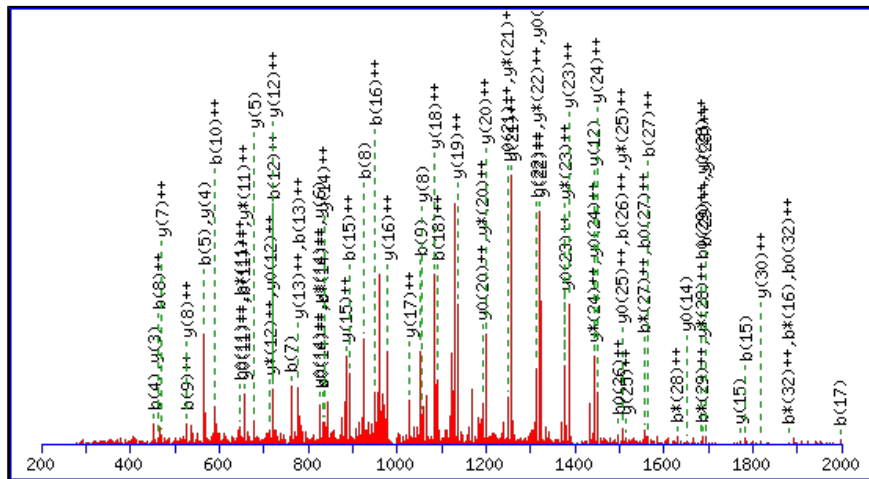

Monoisotopic mass of neutral peptide Mr(calc): 3951.8803

Fixed modifications: Carbamidomethyl (C) (apply to specified residues or termini only)

Variable modifications: N22 : Deamidated (NQ)

Ions Score: 80 Expect: 2.3e-006

Matches : 79/364 fragment ions using 122 most intense peaks ([help](#))

| #  | b                | b <sup>++</sup>  | b <sup>*</sup>   | b <sup>*++</sup> | b <sup>0</sup> | b <sup>0++</sup> | Seq. | y                | y <sup>++</sup>  | y <sup>*</sup> | y <sup>*++</sup> | y <sup>0</sup>   | y <sup>0++</sup> | #  |
|----|------------------|------------------|------------------|------------------|----------------|------------------|------|------------------|------------------|----------------|------------------|------------------|------------------|----|
| 1  | 100.0757         | 50.5415          |                  |                  |                |                  | V    |                  |                  |                |                  |                  |                  | 33 |
| 2  | 187.1077         | 94.0575          |                  |                  | 169.0972       | 85.0522          | S    | 3853.8192        | 1927.4132        | 3836.7926      | 1918.8999        | 3835.8086        | 1918.4079        | 32 |
| 3  | 316.1503         | 158.5788         |                  |                  | 298.1397       | 149.5735         | E    | 3766.7871        | 1883.8972        | 3749.7606      | 1875.3839        | 3748.7766        | 1874.8919        | 31 |
| 4  | <b>453.2092</b>  | 227.1082         |                  |                  | 435.1987       | 218.1030         | H    | 3637.7445        | <b>1819.3759</b> | 3620.7180      | 1810.8626        | 3619.7340        | 1810.3706        | 30 |
| 5  | <b>566.2933</b>  | 283.6503         |                  |                  | 548.2827       | 274.6450         | I    | 3500.6856        | 1750.8464        | 3483.6591      | 1742.3332        | 3482.6751        | 1741.8412        | 29 |
| 6  | 663.3461         | 332.1767         |                  |                  | 645.3355       | 323.1714         | P    | 3387.6016        | <b>1694.3044</b> | 3370.5750      | <b>1685.7911</b> | 3369.5910        | <b>1685.2991</b> | 28 |
| 7  | <b>762.4145</b>  | 381.7109         |                  |                  | 744.4039       | 372.7056         | V    | 3290.5488        | 1645.7780        | 3273.5222      | 1637.2648        | 3272.5382        | 1636.7728        | 27 |
| 8  | <b>925.4778</b>  | <b>463.2425</b>  |                  |                  | 907.4672       | 454.2373         | Y    | 3191.4804        | 1596.2438        | 3174.4538      | 1587.7306        | 3173.4698        | 1587.2385        | 26 |
| 9  | <b>1053.5364</b> | <b>527.2718</b>  | 1036.5098        | 518.7585         | 1035.5258      | 518.2665         | Q    | 3028.4171        | <b>1514.7122</b> | 3011.3905      | <b>1506.1989</b> | 3010.4065        | <b>1505.7069</b> | 25 |
| 10 | 1181.5950        | <b>591.3011</b>  | 1164.5684        | 582.7878         | 1163.5844      | 582.2958         | Q    | 2900.3585        | <b>1450.6829</b> | 2883.3319      | <b>1442.1696</b> | 2882.3479        | <b>1441.6776</b> | 24 |
| 11 | 1310.6375        | <b>655.8224</b>  | 1293.6110        | <b>647.3091</b>  | 1292.6270      | <b>646.8171</b>  | E    | 2772.2999        | <b>1386.6536</b> | 2755.2733      | <b>1378.1403</b> | 2754.2893        | <b>1377.6483</b> | 23 |
| 12 | 1439.6801        | <b>720.3437</b>  | 1422.6536        | 711.8304         | 1421.6696      | 711.3384         | E    | 2643.2573        | <b>1322.1323</b> | 2626.2308      | <b>1313.6190</b> | 2625.2467        | <b>1313.1270</b> | 22 |
| 13 | 1553.7231        | <b>777.3652</b>  | 1536.6965        | 768.8519         | 1535.7125      | 768.3599         | N    | 2514.2147        | <b>1257.6110</b> | 2497.1882      | <b>1249.0977</b> | 2496.2041        | <b>1248.6057</b> | 21 |
| 14 | 1681.7816        | 841.3945         | 1664.7551        | <b>832.8812</b>  | 1663.7711      | <b>832.3892</b>  | Q    | 2400.1718        | <b>1200.5895</b> | 2383.1452      | <b>1192.0763</b> | 2382.1612        | <b>1191.5842</b> | 20 |
| 15 | <b>1782.8293</b> | <b>891.9183</b>  | 1765.8028        | 883.4050         | 1764.8188      | 882.9130         | T    | 2272.1132        | <b>1136.5602</b> | 2255.0867      | 1128.0470        | 2254.1026        | 1127.5550        | 19 |
| 16 | 1897.8563        | <b>949.4318</b>  | <b>1880.8297</b> | 940.9185         | 1879.8457      | 940.4265         | D    | 2171.0655        | <b>1086.0364</b> | 2154.0390      | 1077.5231        | 2153.0550        | 1077.0311        | 18 |
| 17 | <b>1996.9247</b> | 998.9660         | 1979.8981        | 990.4527         | 1978.9141      | 989.9607         | V    | 2056.0386        | <b>1028.5229</b> | 2039.0120      | 1020.0097        | 2038.0280        | 1019.5176        | 17 |
| 18 | 2183.0040        | <b>1092.0056</b> | 2165.9774        | 1083.4924        | 2164.9934      | 1083.0004        | W    | 1956.9702        | <b>978.9887</b>  | 1939.9436      | 970.4754         | 1938.9596        | 969.9834         | 16 |
| 19 | 2284.0517        | 1142.5295        | 2267.0251        | 1134.0162        | 2266.0411      | 1133.5242        | T    | <b>1770.8909</b> | <b>885.9491</b>  | 1753.8643      | 877.4358         | 1752.8803        | 876.9438         | 15 |
| 20 | 2397.1357        | 1199.0715        | 2380.1092        | 1190.5582        | 2379.1252      | 1190.0662        | L    | 1669.8432        | <b>835.4252</b>  | 1652.8166      | <b>826.9120</b>  | <b>1651.8326</b> | <b>826.4199</b>  | 14 |
| 21 | 2510.2198        | 1255.6135        | 2493.1932        | 1247.1003        | 2492.2092      | 1246.6083        | L    | 1556.7591        | <b>778.8832</b>  | 1539.7326      | 770.3699         | 1538.7485        | 769.8779         | 13 |
| 22 | 2625.2467        | <b>1313.1270</b> | 2608.2202        | 1304.6137        | 2607.2362      | 1304.1217        | N    | <b>1443.6750</b> | <b>722.3412</b>  | 1426.6485      | <b>713.8279</b>  | 1425.6645        | <b>713.3359</b>  | 12 |
| 23 | 2682.2682        | 1341.6377        | 2665.2417        | 1333.1245        | 2664.2576      | 1332.6325        | G    | 1328.6481        | 664.8277         | 1311.6216      | <b>656.3144</b>  | 1310.6375        | <b>655.8224</b>  | 11 |

|    |           |           |           |           |           |           |   |           |          |           |          |           |          |    |
|----|-----------|-----------|-----------|-----------|-----------|-----------|---|-----------|----------|-----------|----------|-----------|----------|----|
| 24 | 2769.3002 | 1385.1538 | 2752.2737 | 1376.6405 | 2751.2897 | 1376.1485 | S | 1271.6266 | 636.3170 | 1254.6001 | 627.8037 | 1253.6161 | 627.3117 | 10 |
| 25 | 2897.3952 | 1449.2012 | 2880.3686 | 1440.6880 | 2879.3846 | 1440.1960 | K | 1184.5946 | 592.8009 | 1167.5681 | 584.2877 | 1166.5840 | 583.7957 | 9  |
| 26 | 3012.4221 | 1506.7147 | 2995.3956 | 1498.2014 | 2994.4116 | 1497.7094 | D | 1056.4997 | 528.7535 | 1039.4731 | 520.2402 | 1038.4891 | 519.7482 | 8  |
| 27 | 3127.4491 | 1564.2282 | 3110.4225 | 1555.7149 | 3109.4385 | 1555.2229 | D | 941.4727  | 471.2400 | 924.4462  | 462.7267 | 923.4621  | 462.2347 | 7  |
| 28 | 3274.5175 | 1637.7624 | 3257.4909 | 1629.2491 | 3256.5069 | 1628.7571 | F | 826.4458  | 413.7265 | 809.4192  | 405.2132 | 808.4352  | 404.7212 | 6  |
| 29 | 3387.6016 | 1694.3044 | 3370.5750 | 1685.7911 | 3369.5910 | 1685.2991 | L | 679.3774  | 340.1923 | 662.3508  | 331.6790 | 661.3668  | 331.1870 | 5  |
| 30 | 3500.6856 | 1750.8464 | 3483.6591 | 1742.3332 | 3482.6751 | 1741.8412 | I | 566.2933  | 283.6503 | 549.2667  | 275.1370 | 548.2827  | 274.6450 | 4  |
| 31 | 3663.7490 | 1832.3781 | 3646.7224 | 1823.8648 | 3645.7384 | 1823.3728 | Y | 453.2092  | 227.1082 | 436.1827  | 218.5950 | 435.1987  | 218.1030 | 3  |
| 32 | 3778.7759 | 1889.8916 | 3761.7493 | 1881.3783 | 3760.7653 | 1880.8863 | D | 290.1459  | 145.5766 | 273.1193  | 137.0633 | 272.1353  | 136.5713 | 2  |
| 33 |           |           |           |           |           |           | R | 175.1190  | 88.0631  | 158.0924  | 79.5498  |           |          | 1  |

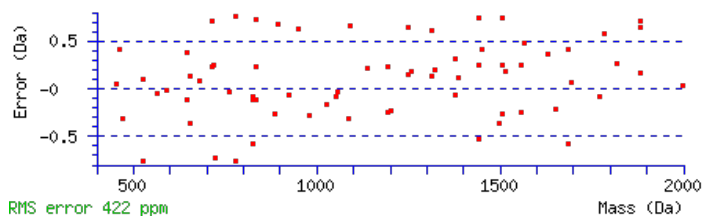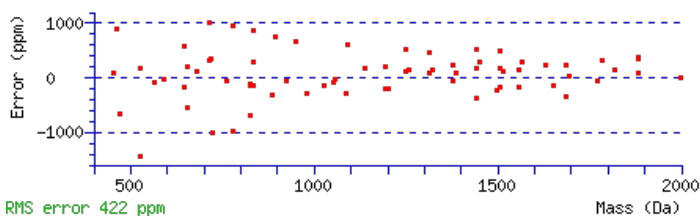

NCBI BLAST search of [VSEHIPVYQQEENQTDVWTLNLSKDDFLIYDR](#)

(Parameters: blastp, nr protein database, expect=20000, no filter, PAM30)

Other BLAST [web gateways](#)

All matches to this query

| Score | Mr(calc)  | Delta   | Sequence                                                | Site Analysis         |
|-------|-----------|---------|---------------------------------------------------------|-----------------------|
| 80.1  | 3951.8803 | 0.0011  | <a href="#">VSEHIPVYQQEENQTDVWTLNLSKDDFLIYDR</a>        | Deamidated N22 29.94% |
| 79.1  | 3951.8803 | 0.0011  | <a href="#">VSEHIPVYQQEENQTDVWTLNLSKDDFLIYDR</a>        | Deamidated Q14 23.84% |
| 78.0  | 3951.8803 | 0.0011  | <a href="#">VSEHIPVYQQEENQTDVWTLNLSKDDFLIYDR</a>        | Deamidated N13 18.85% |
| 77.1  | 3951.8803 | 0.0011  | <a href="#">VSEHIPVYQQEENQTDVWTLNLSKDDFLIYDR</a>        | Deamidated Q10 15.21% |
| 76.2  | 3951.8803 | 0.0011  | <a href="#">VSEHIPVYQQEENQTDVWTLNLSKDDFLIYDR</a>        | Deamidated Q9 12.17%  |
| 75.7  | 3950.8963 | 0.9851  | <a href="#">VSEHIPVYQQEENQTDVWTLNLSKDDFLIYDR</a>        |                       |
| 12.2  | 3950.8976 | 0.9838  | <a href="#">NELLGTASVNLNLSNVLKNNGGKMMENMQLTLNLQTENK</a> |                       |
| 9.2   | 3951.9003 | -0.0189 | <a href="#">STGFCPLPHSQADQYVLSWDQQLNLAYVGVPHR</a>       |                       |
| 9.2   | 3951.9003 | -0.0189 | <a href="#">STGFCPLPHSQADQYVLSWDQQLNLAYVGVPHR</a>       |                       |
| 8.4   | 3950.8976 | 0.9838  | <a href="#">NELLGTASVNLNLSNVLKNNGGKMMENMQLTLNLQTENK</a> |                       |

Mascot: <http://www.matrixscience.com/>

# MATRIX SCIENCE Mascot Search Results

## Peptide View

MS/MS Fragmentation of **VSEHIPVYQEEHQTDVWTLNGSK**

Found in **D6REX5** in **con\_Xuniprot\_HUMAN3**, D6REX5\_HUMAN Selenoprotein P (Fragment) OS=Homo sapiens GN=SEPP1 PE=4 SV=1

Match to Query 26781: 2914.404132 from(972.475320,3+) intensity(21397.0410) rtinseconds(1919) scans(4997) index(6563)

Title: 111019\_Est\_ISCardio\_NMI\_YP\_G\_9Spectrum4390\_scans\_\_4997

Data file C:\mascot\20140703\_Tmgf\_1D\CSV\_UseAnalysis\MasterCSV\All\_Glyco\mgf\ptm\UC18ERLIC\_PTM\_35D.mgf

Click mouse within plot area to zoom in by factor of two about that point

Or, to Da

Label all possible matches Label matches used for scoring

Show Y-axis

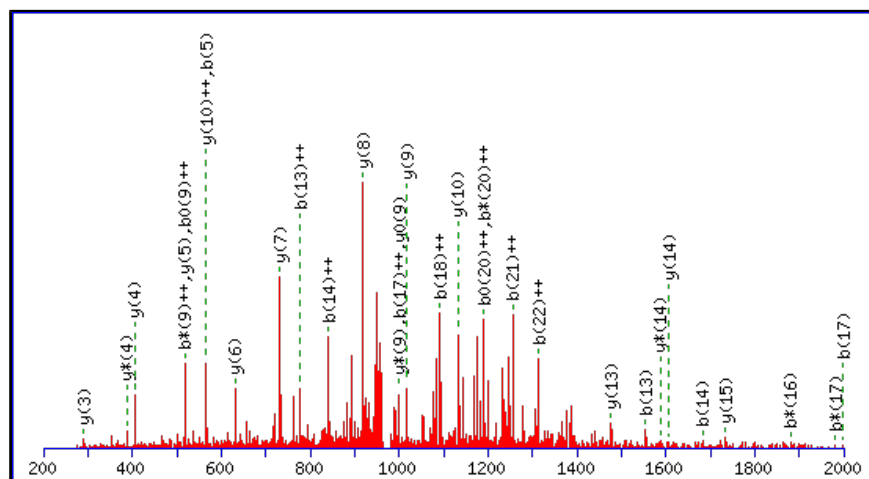

Monoisotopic mass of neutral peptide Mr(calc): 2914.3985

Fixed modifications: Carbamidomethyl (C) (apply to specified residues or termini only)

Variable modifications:

N13 : Deamidated (NQ)

Ions Score: 71 Expect: 2e-005

Matches : 32/268 fragment ions using 36 most intense peaks ([help](#))

| #  | b                | b <sup>++</sup>  | b <sup>*</sup>   | b <sup>*++</sup> | b <sup>0</sup> | b <sup>0++</sup> | Seq. | y                | y <sup>++</sup> | y <sup>*</sup>   | y <sup>*++</sup> | y <sup>0</sup>  | y <sup>0++</sup> | #  |
|----|------------------|------------------|------------------|------------------|----------------|------------------|------|------------------|-----------------|------------------|------------------|-----------------|------------------|----|
| 1  | 100.0757         | 50.5415          |                  |                  |                |                  | V    |                  |                 |                  |                  |                 |                  | 25 |
| 2  | 187.1077         | 94.0575          |                  |                  | 169.0972       | 85.0522          | S    | 2816.3373        | 1408.6723       | 2799.3108        | 1400.1590        | 2798.3268       | 1399.6670        | 24 |
| 3  | 316.1503         | 158.5788         |                  |                  | 298.1397       | 149.5735         | E    | 2729.3053        | 1365.1563       | 2712.2788        | 1356.6430        | 2711.2948       | 1356.1510        | 23 |
| 4  | 453.2092         | 227.1082         |                  |                  | 435.1987       | 218.1030         | H    | 2600.2627        | 1300.6350       | 2583.2362        | 1292.1217        | 2582.2522       | 1291.6297        | 22 |
| 5  | <b>566.2933</b>  | 283.6503         |                  |                  | 548.2827       | 274.6450         | I    | 2463.2038        | 1232.1055       | 2446.1773        | 1223.5923        | 2445.1932       | 1223.1003        | 21 |
| 6  | 663.3461         | 332.1767         |                  |                  | 645.3355       | 323.1714         | P    | 2350.1197        | 1175.5635       | 2333.0932        | 1167.0502        | 2332.1092       | 1166.5582        | 20 |
| 7  | 762.4145         | 381.7109         |                  |                  | 744.4039       | 372.7056         | V    | 2253.0670        | 1127.0371       | 2236.0404        | 1118.5239        | 2235.0564       | 1118.0318        | 19 |
| 8  | 925.4778         | 463.2425         |                  |                  | 907.4672       | 454.2373         | Y    | 2153.9986        | 1077.5029       | 2136.9720        | 1068.9896        | 2135.9880       | 1068.4976        | 18 |
| 9  | 1053.5364        | 527.2718         | 1036.5098        | <b>518.7585</b>  | 1035.5258      | <b>518.2665</b>  | Q    | 1990.9352        | 995.9713        | 1973.9087        | 987.4580         | 1972.9247       | 986.9660         | 17 |
| 10 | 1181.5950        | 591.3011         | 1164.5684        | 582.7878         | 1163.5844      | 582.2958         | Q    | 1862.8767        | 931.9420        | 1845.8501        | 923.4287         | 1844.8661       | 922.9367         | 16 |
| 11 | 1310.6375        | 655.8224         | 1293.6110        | 647.3091         | 1292.6270      | 646.8171         | E    | <b>1734.8181</b> | 867.9127        | 1717.7915        | 859.3994         | 1716.8075       | 858.9074         | 15 |
| 12 | 1439.6801        | 720.3437         | 1422.6536        | 711.8304         | 1421.6696      | 711.3384         | E    | <b>1605.7755</b> | 803.3914        | <b>1588.7489</b> | 794.8781         | 1587.7649       | 794.3861         | 14 |
| 13 | <b>1554.7071</b> | <b>777.8572</b>  | 1537.6805        | 769.3439         | 1536.6965      | 768.8519         | N    | <b>1476.7329</b> | 738.8701        | 1459.7064        | 730.3568         | 1458.7223       | 729.8648         | 13 |
| 14 | <b>1682.7657</b> | <b>841.8865</b>  | 1665.7391        | 833.3732         | 1664.7551      | 832.8812         | Q    | 1361.7060        | 681.3566        | 1344.6794        | 672.8433         | 1343.6954       | 672.3513         | 12 |
| 15 | 1783.8133        | 892.4103         | 1766.7868        | 883.8970         | 1765.8028      | 883.4050         | T    | 1233.6474        | 617.3273        | 1216.6208        | 608.8141         | 1215.6368       | 608.3220         | 11 |
| 16 | 1898.8403        | 949.9238         | <b>1881.8137</b> | 941.4105         | 1880.8297      | 940.9185         | D    | <b>1132.5997</b> | <b>566.8035</b> | 1115.5732        | 558.2902         | 1114.5891       | 557.7982         | 10 |
| 17 | <b>1997.9087</b> | <b>999.4580</b>  | <b>1980.8821</b> | 990.9447         | 1979.8981      | 990.4527         | V    | <b>1017.5728</b> | 509.2900        | <b>1000.5462</b> | 500.7767         | <b>999.5622</b> | 500.2847         | 9  |
| 18 | 2183.9880        | <b>1092.4976</b> | 2166.9615        | 1083.9844        | 2165.9774      | 1083.4924        | W    | <b>918.5043</b>  | 459.7558        | 901.4778         | 451.2425         | 900.4938        | 450.7505         | 8  |
| 19 | 2285.0357        | 1143.0215        | 2268.0091        | 1134.5082        | 2267.0251      | 1134.0162        | T    | <b>732.4250</b>  | 366.7162        | 715.3985         | 358.2029         | 714.4145        | 357.7109         | 7  |
| 20 | 2398.1197        | 1199.5635        | 2381.0932        | <b>1191.0502</b> | 2380.1092      | <b>1190.5582</b> | L    | <b>631.3774</b>  | 316.1923        | 614.3508         | 307.6790         | 613.3668        | 307.1870         | 6  |
| 21 | 2511.2038        | <b>1256.1055</b> | 2494.1773        | 1247.5923        | 2493.1932      | 1247.1003        | L    | <b>518.2933</b>  | 259.6503        | 501.2667         | 251.1370         | 500.2827        | 250.6450         | 5  |
| 22 | 2625.2467        | <b>1313.1270</b> | 2608.2202        | 1304.6137        | 2607.2362      | 1304.1217        | N    | <b>405.2092</b>  | 203.1082        | <b>388.1827</b>  | 194.5950         | 387.1987        | 194.1030         | 4  |
| 23 | 2682.2682        | 1341.6377        | 2665.2417        | 1333.1245        | 2664.2576      | 1332.6325        | G    | <b>291.1663</b>  | 146.0868        | 274.1397         | 137.5735         | 273.1557        | 137.0815         | 3  |

|    |           |           |           |           |           |           |   |          |          |          |          |          |          |   |
|----|-----------|-----------|-----------|-----------|-----------|-----------|---|----------|----------|----------|----------|----------|----------|---|
| 24 | 2769.3002 | 1385.1538 | 2752.2737 | 1376.6405 | 2751.2897 | 1376.1485 | S | 234.1448 | 117.5761 | 217.1183 | 109.0628 | 216.1343 | 108.5708 | 2 |
| 25 |           |           |           |           |           |           | K | 147.1128 | 74.0600  | 130.0863 | 65.5468  |          |          | 1 |

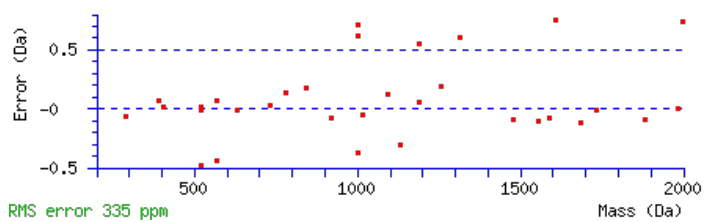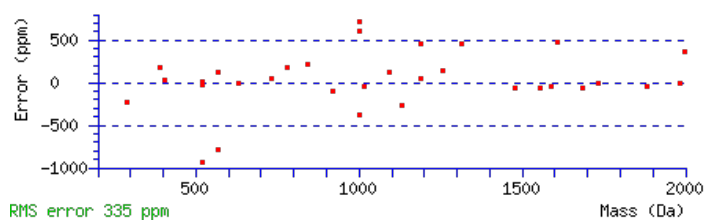

NCBI BLAST search of [VSEHIPVYQQEENQTDVWTLNGSK](#)  
 (Parameters: blastp, nr protein database, expect=20000, no filter, PAM30)  
 Other BLAST [web gateways](#)

All matches to this query

| Score | Mr(calc)  | Delta  | Sequence                                   | Site Analysis         |
|-------|-----------|--------|--------------------------------------------|-----------------------|
| 71.4  | 2914.3985 | 0.0057 | <a href="#">VSEHIPVYQQEENQTDVWTLNGSK</a>   | Deamidated N13 62.86% |
| 69.0  | 2914.3985 | 0.0057 | <a href="#">VSEHIPVYQQEENQTDVWTLNGSK</a>   | Deamidated Q14 36.59% |
| 47.6  | 2914.3985 | 0.0057 | <a href="#">VSEHIPVYQQEENQTDVWTLNGSK</a>   | Deamidated Q10 0.26%  |
| 47.6  | 2914.3985 | 0.0057 | <a href="#">VSEHIPVYQQEENQTDVWTLNGSK</a>   | Deamidated Q9 0.26%   |
| 34.4  | 2914.3985 | 0.0057 | <a href="#">VSEHIPVYQQEENQTDVWTLNGSK</a>   | Deamidated N22 0.01%  |
| 32.0  | 2913.4145 | 0.9897 | <a href="#">VSEHIPVYQQEENQTDVWTLNGSK</a>   |                       |
| 5.8   | 2913.4039 | 1.0003 | <a href="#">SVTDYPOQNPAAQIPARQREIEMNR</a>  |                       |
| 5.8   | 2913.4039 | 1.0003 | <a href="#">SVTDYPOQNPAAQIPARQREIEMNR</a>  |                       |
| 5.8   | 2914.3980 | 0.0061 | <a href="#">ELYLSGCVLPEQLSTMQLEGFQDLK</a>  |                       |
| 4.8   | 2913.4120 | 0.9922 | <a href="#">VGLYTISMNPANIYQFAVGGHDQFVR</a> |                       |

Mascot: <http://www.matrixscience.com/>



# MATRIX SCIENCE Mascot Search Results

## Peptide View

MS/MS Fragmentation of **EGYSNISYIVVNHQGISSR**

Found in **D6REX5** in **con\_Xuniprot\_HUMAN3**, D6REX5\_HUMAN Selenoprotein P (Fragment) OS=Homo sapiens GN=SEPP1 PE=4 SV=1

Match to Query 14240: 2124.017728 from(1063.016140,2+) intensity(17187.3340) rtinseconds(1448) scans(3482) index(23196)

Title: 111019\_Est\_MI\_YS\_G\_04Spectrum2974\_scans\_3482

Data file C:\mascot\20140703\_Tmgf\_1D\CSV\_UseAnalysis\MasterCSV\All\_Glyco\mgf\ptm\UC18ERLIC\_PTM\_35D.mgf

Click mouse within plot area to zoom in by factor of two about that point

Or, to Da

Label all possible matches Label matches used for scoring

Show Y-axis

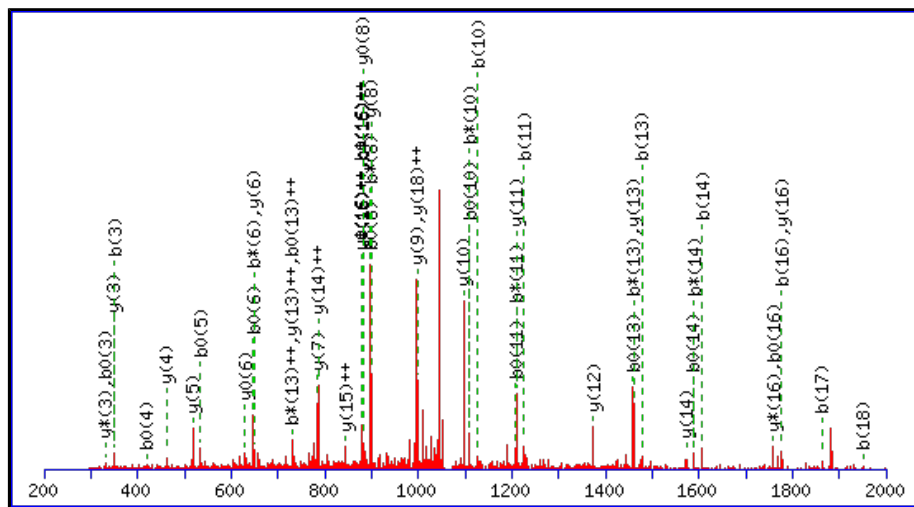

Monoisotopic mass of neutral peptide Mr(calc): 2124.0123

Fixed modifications: Carbamidomethyl (C) (apply to specified residues or termini only)

Variable modifications:

N5 : Deamidated (NQ)

Q14 : Deamidated (NQ)

Ions Score: 69 Expect: 3.5e-005

Matches : 51/206 fragment ions using 86 most intense peaks ([help](#))

| #  | b                | b <sup>++</sup> | b*               | b <sup>***</sup> | b <sup>0</sup>   | b <sup>0++</sup> | Seq. | y                | y <sup>++</sup> | y*               | y <sup>***</sup> | y <sup>0</sup>  | y <sup>0++</sup> | #  |
|----|------------------|-----------------|------------------|------------------|------------------|------------------|------|------------------|-----------------|------------------|------------------|-----------------|------------------|----|
| 1  | 130.0499         | 65.5286         |                  |                  | 112.0393         | 56.5233          | E    |                  |                 |                  |                  |                 |                  | 19 |
| 2  | 187.0713         | 94.0393         |                  |                  | 169.0608         | 85.0340          | G    | 1995.9770        | 998.4922        | 1978.9505        | 989.9789         | 1977.9665       | 989.4869         | 18 |
| 3  | <b>350.1347</b>  | 175.5710        |                  |                  | 332.1241         | 166.5657         | Y    | 1938.9556        | 969.9814        | 1921.9290        | 961.4682         | 1920.9450       | 960.9761         | 17 |
| 4  | 437.1667         | 219.0870        |                  |                  | 419.1561         | 210.0817         | S    | <b>1775.8923</b> | 888.4498        | <b>1758.8657</b> | <b>879.9365</b>  | 1757.8817       | <b>879.4445</b>  | 16 |
| 5  | 552.1936         | 276.6005        | 535.1671         | 268.0872         | 534.1831         | 267.5952         | N    | 1688.8602        | <b>844.9338</b> | 1671.8337        | 836.4205         | 1670.8497       | 835.9285         | 15 |
| 6  | 665.2777         | 333.1425        | <b>648.2511</b>  | 324.6292         | <b>647.2671</b>  | 324.1372         | I    | <b>1573.8333</b> | <b>787.4203</b> | 1556.8067        | 778.9070         | 1555.8227       | 778.4150         | 14 |
| 7  | 752.3097         | 376.6585        | 735.2832         | 368.1452         | 734.2992         | 367.6532         | S    | <b>1460.7492</b> | <b>730.8782</b> | 1443.7227        | 722.3650         | 1442.7387       | 721.8730         | 13 |
| 8  | 915.3731         | 458.1902        | <b>898.3465</b>  | 449.6769         | <b>897.3625</b>  | 449.1849         | Y    | <b>1373.7172</b> | 687.3622        | 1356.6906        | 678.8490         | 1355.7066       | 678.3570         | 12 |
| 9  | 1028.4571        | 514.7322        | 1011.4306        | 506.2189         | 1010.4466        | 505.7269         | I    | <b>1210.6539</b> | 605.8306        | 1193.6273        | 597.3173         | 1192.6433       | 596.8253         | 11 |
| 10 | <b>1127.5255</b> | 564.2664        | <b>1110.4990</b> | 555.7531         | <b>1109.5150</b> | 555.2611         | V    | <b>1097.5698</b> | 549.2885        | 1080.5432        | 540.7753         | 1079.5592       | 540.2833         | 10 |
| 11 | <b>1226.5939</b> | 613.8006        | <b>1209.5674</b> | 605.2873         | <b>1208.5834</b> | 604.7953         | V    | <b>998.5014</b>  | 499.7543        | 981.4748         | 491.2411         | 980.4908        | 490.7490         | 9  |
| 12 | 1340.6369        | 670.8221        | 1323.6103        | 662.3088         | 1322.6263        | 661.8168         | N    | <b>899.4330</b>  | 450.2201        | 882.4064         | 441.7068         | <b>881.4224</b> | 441.2148         | 8  |
| 13 | <b>1477.6958</b> | 739.3515        | <b>1460.6692</b> | <b>730.8383</b>  | <b>1459.6852</b> | <b>730.3462</b>  | H    | <b>785.3900</b>  | 393.1987        | 768.3635         | 384.6854         | 767.3795        | 384.1934         | 7  |
| 14 | <b>1606.7384</b> | 803.8728        | <b>1589.7118</b> | 795.3596         | <b>1588.7278</b> | 794.8675         | Q    | <b>648.3311</b>  | 324.6692        | 631.3046         | 316.1559         | <b>630.3206</b> | 315.6639         | 6  |
| 15 | 1663.7598        | 832.3836        | 1646.7333        | 823.8703         | 1645.7493        | 823.3783         | G    | <b>519.2885</b>  | 260.1479        | 502.2620         | 251.6346         | 501.2780        | 251.1426         | 5  |
| 16 | <b>1776.8439</b> | 888.9256        | 1759.8174        | <b>880.4123</b>  | <b>1758.8333</b> | <b>879.9203</b>  | I    | <b>462.2671</b>  | 231.6372        | 445.2405         | 223.1239         | 444.2565        | 222.6319         | 4  |
| 17 | <b>1863.8759</b> | 932.4416        | 1846.8494        | 923.9283         | 1845.8654        | 923.4363         | S    | <b>349.1830</b>  | 175.0951        | <b>332.1565</b>  | 166.5819         | 331.1724        | 166.0899         | 3  |
| 18 | <b>1950.9080</b> | 975.9576        | 1933.8814        | 967.4443         | 1932.8974        | 966.9523         | S    | 262.1510         | 131.5791        | 245.1244         | 123.0659         | 244.1404        | 122.5738         | 2  |
| 19 |                  |                 |                  |                  |                  |                  | R    | 175.1190         | 88.0631         | 158.0924         | 79.5498          |                 |                  | 1  |



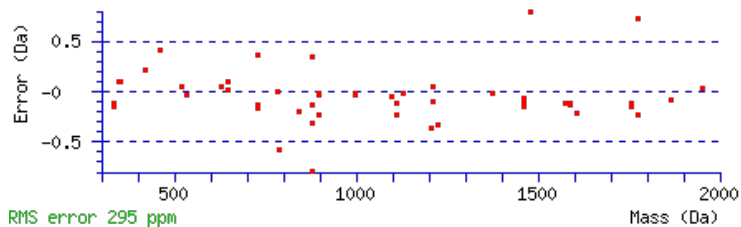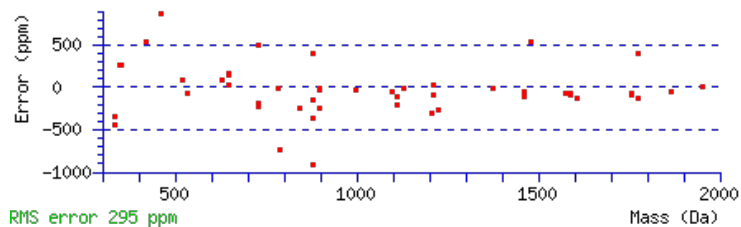

NCBI BLAST search of [EGYSNISYIVVNHQGISSR](#)

(Parameters: blastp, nr protein database, expect=20000, no filter, PAM30)

Other BLAST [web gateways](#)

**All matches to this query**

| Score | Mr(calc)  | Delta   | Sequence                             | Site Analysis             |
|-------|-----------|---------|--------------------------------------|---------------------------|
| 68.5  | 2124.0123 | 0.0054  | <a href="#">EGYSNISYIVVNHQGISSR</a>  | Deamidated N5, Q14 50.26% |
| 68.5  | 2124.0123 | 0.0054  | <a href="#">EGYSNISYIVVNHQGISSR</a>  | Deamidated N5, N12 49.45% |
| 46.2  | 2124.0123 | 0.0054  | <a href="#">EGYSNISYIVVNHQGISSR</a>  | Deamidated N12, Q14 0.29% |
| 8.3   | 2124.0236 | -0.0059 | <a href="#">NSESTIPPGEDSKDVAAPHR</a> |                           |
| 6.6   | 2124.0276 | -0.0099 | <a href="#">AYDKKYETLNSFQNFTR</a>    |                           |
| 1.9   | 2122.0146 | 2.0031  | <a href="#">MSLADRGNPGNITSRLMEK</a>  |                           |

Mascot: <http://www.matrixscience.com/>

# MASCOT SCIENCE Mascot Search Results

## Peptide View

MS/MS Fragmentation of **LKKEGYSNISYIVVNHQGISSR**

Found in **D6REX5** in **con\_Xuniprot\_HUMAN3**, D6REX5\_HUMAN Selenoprotein P (Fragment) OS=Homo sapiens GN=SEPP1 PE=4 SV=1

Match to Query 21521: 2492.302936 from(624.083010,4+) intensity(30861.2051) rtinseconds(1023) scans(2544) index(23848)

Title: 111019\_Est\_MI\_YS\_G\_05Spectrum2164\_scans\_\_2544

Data file C:\\mascot\\20140703\_Tmgf\_1D\\CSV\_UseAnalysis\\MasterCSV\\All\_Glyco\\mgf\\ptm\\UC18ERLIC\_PTM\_35D.mgf

Click mouse within plot area to zoom in by factor of two about that point

Or, to Da

Label all possible matches Label matches used for scoring

Show Y-axis

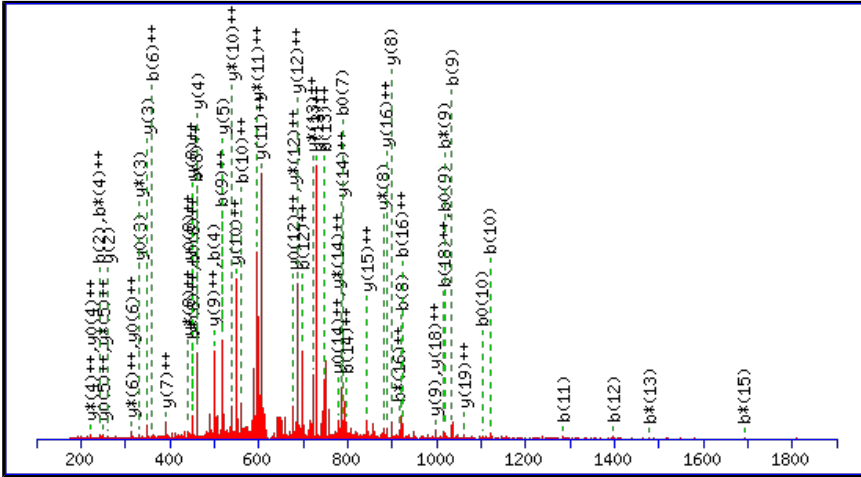

Monoisotopic mass of neutral peptide Mr(calc): 2492.3023

Fixed modifications: Carbamidomethyl (C) (apply to specified residues or termini only)

Variable modifications:

N8 : Deamidated (NQ)

Ions Score: 52 Expect: 0.0011

Matches : 62/242 fragment ions using 113 most intense peaks ([help](#))

| #  | b                | b <sup>++</sup>  | b <sup>*</sup>   | b <sup>*++</sup> | b <sup>0</sup>   | b <sup>0++</sup> | Seq. | y               | y <sup>++</sup>  | y <sup>*</sup>  | y <sup>*++</sup> | y <sup>0</sup>  | y <sup>0++</sup> | #  |
|----|------------------|------------------|------------------|------------------|------------------|------------------|------|-----------------|------------------|-----------------|------------------|-----------------|------------------|----|
| 1  | 114.0913         | 57.5493          |                  |                  |                  |                  | L    |                 |                  |                 |                  |                 |                  | 22 |
| 2  | <b>242.1863</b>  | 121.5968         | 225.1598         | 113.0835         |                  |                  | K    | 2380.2255       | 1190.6164        | 2363.1990       | 1182.1031        | 2362.2150       | 1181.6111        | 21 |
| 3  | 370.2813         | 185.6443         | 353.2547         | 177.1310         |                  |                  | K    | 2252.1306       | 1126.5689        | 2235.1040       | 1118.0557        | 2234.1200       | 1117.5636        | 20 |
| 4  | <b>499.3239</b>  | 250.1656         | 482.2973         | <b>241.6523</b>  | 481.3133         | 241.1603         | E    | 2124.0356       | <b>1062.5214</b> | 2107.0091       | 1054.0082        | 2106.0251       | 1053.5162        | 19 |
| 5  | 556.3453         | 278.6763         | 539.3188         | 270.1630         | 538.3348         | 269.6710         | G    | 1994.9930       | <b>998.0002</b>  | 1977.9665       | 989.4869         | 1976.9825       | 988.9949         | 18 |
| 6  | 719.4087         | <b>360.2080</b>  | 702.3821         | 351.6947         | 701.3981         | 351.2027         | Y    | 1937.9716       | 969.4894         | 1920.9450       | 960.9761         | 1919.9610       | 960.4841         | 17 |
| 7  | 806.4407         | 403.7240         | 789.4141         | 395.2107         | <b>788.4301</b>  | 394.7187         | S    | 1774.9082       | <b>887.9578</b>  | 1757.8817       | 879.4445         | 1756.8977       | 878.9525         | 16 |
| 8  | <b>921.4676</b>  | <b>461.2374</b>  | 904.4411         | <b>452.7242</b>  | 903.4571         | <b>452.2322</b>  | N    | 1687.8762       | <b>844.4417</b>  | 1670.8497       | 835.9285         | 1669.8656       | 835.4365         | 15 |
| 9  | <b>1034.5517</b> | <b>517.7795</b>  | <b>1017.5251</b> | 509.2662         | <b>1016.5411</b> | 508.7742         | I    | 1572.8493       | <b>786.9283</b>  | 1555.8227       | <b>778.4150</b>  | 1554.8387       | <b>777.9230</b>  | 14 |
| 10 | <b>1121.5837</b> | <b>561.2955</b>  | 1104.5572        | 552.7822         | <b>1103.5731</b> | 552.2902         | S    | 1459.7652       | <b>730.3862</b>  | 1442.7387       | <b>721.8730</b>  | 1441.7546       | 721.3810         | 13 |
| 11 | <b>1284.6470</b> | 642.8272         | 1267.6205        | 634.3139         | 1266.6365        | 633.8219         | Y    | 1372.7332       | <b>686.8702</b>  | 1355.7066       | <b>678.3570</b>  | 1354.7226       | <b>677.8649</b>  | 12 |
| 12 | <b>1397.7311</b> | <b>699.3692</b>  | 1380.7046        | 690.8559         | 1379.7205        | 690.3639         | I    | 1209.6698       | <b>605.3386</b>  | 1192.6433       | <b>596.8253</b>  | 1191.6593       | 596.3333         | 11 |
| 13 | 1496.7995        | <b>748.9034</b>  | <b>1479.7730</b> | 740.3901         | 1478.7890        | 739.8981         | V    | 1096.5858       | <b>548.7965</b>  | 1079.5592       | <b>540.2833</b>  | 1078.5752       | 539.7912         | 10 |
| 14 | 1595.8679        | <b>798.4376</b>  | 1578.8414        | 789.9243         | 1577.8574        | 789.4323         | V    | <b>997.5174</b> | <b>499.2623</b>  | 980.4908        | 490.7490         | 979.5068        | 490.2570         | 9  |
| 15 | 1709.9109        | 855.4591         | <b>1692.8843</b> | 846.9458         | 1691.9003        | 846.4538         | N    | <b>898.4490</b> | <b>449.7281</b>  | <b>881.4224</b> | <b>441.2148</b>  | 880.4384        | <b>440.7228</b>  | 8  |
| 16 | 1846.9698        | <b>923.9885</b>  | 1829.9432        | <b>915.4753</b>  | 1828.9592        | 914.9832         | H    | 784.4060        | <b>392.7067</b>  | 767.3795        | 384.1934         | 766.3955        | 383.7014         | 7  |
| 17 | 1975.0284        | 988.0178         | 1958.0018        | 979.5045         | 1957.0178        | 979.0125         | Q    | 647.3471        | 324.1772         | 630.3206        | <b>315.6639</b>  | 629.3365        | <b>315.1719</b>  | 6  |
| 18 | 2032.0498        | <b>1016.5285</b> | 2015.0233        | 1008.0153        | 2014.0393        | 1007.5233        | G    | <b>519.2885</b> | 260.1479         | 502.2620        | <b>251.6346</b>  | 501.2780        | <b>251.1426</b>  | 5  |
| 19 | 2145.1339        | 1073.0706        | 2128.1073        | 1064.5573        | 2127.1233        | 1064.0653        | I    | <b>462.2671</b> | 231.6372         | 445.2405        | <b>223.1239</b>  | 444.2565        | <b>222.6319</b>  | 4  |
| 20 | 2232.1659        | 1116.5866        | 2215.1394        | 1108.0733        | 2214.1553        | 1107.5813        | S    | <b>349.1830</b> | 175.0951         | <b>332.1565</b> | 166.5819         | <b>331.1724</b> | 166.0899         | 3  |
| 21 | 2319.1979        | 1160.1026        | 2302.1714        | 1151.5893        | 2301.1874        | 1151.0973        | S    | <b>262.1510</b> | 131.5791         | 245.1244        | 123.0659         | 244.1404        | 122.5738         | 2  |
| 22 |                  |                  |                  |                  |                  |                  | R    | 175.1190        | 88.0631          | 158.0924        | 79.5498          |                 |                  | 1  |

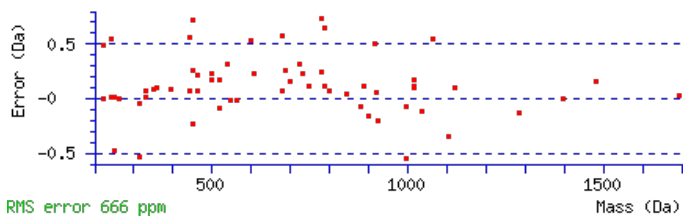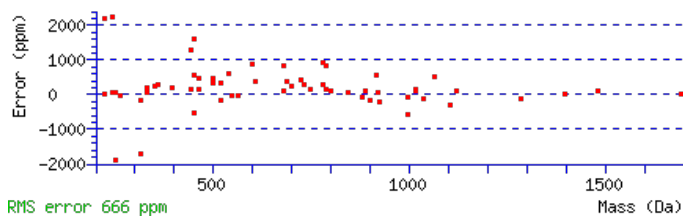

NCBI BLAST search of [LKKEGYSNISYIVVNHQGISSR](#)

(Parameters: blastp, nr protein database, expect=20000, no filter, PAM30)

Other BLAST [web gateways](#)

All matches to this query

| Score | Mr(calc)  | Delta   | Sequence                                    | Site Analysis         |
|-------|-----------|---------|---------------------------------------------|-----------------------|
| 52.5  | 2492.3023 | 0.0006  | <a href="#">LKKEGYSNISYIVVNHQGISSR</a>      | Deamidated N8 76.17%  |
| 44.8  | 2492.3023 | 0.0006  | <a href="#">LKKEGYSNISYIVVNHQGISSR</a>      | Deamidated N15 12.85% |
| 44.1  | 2492.3023 | 0.0006  | <a href="#">LKKEGYSNISYIVVNHQGISSR</a>      | Deamidated Q17 10.98% |
| 6.0   | 2491.2998 | 1.0031  | <a href="#">RYETNQLKTYVYIVLDPFTK</a>        |                       |
| 5.6   | 2492.3122 | -0.0093 | <a href="#">QASVLDVAVLVELTKYNSGSTQIR</a>    |                       |
| 5.3   | 2491.2932 | 1.0098  | <a href="#">LWAAGTPSPSAPGARQD GALGAGRVK</a> |                       |
| 4.3   | 2492.3122 | -0.0093 | <a href="#">QASVLDVAVLVELTKYNSGSTQIR</a>    |                       |
| 3.6   | 2491.2961 | 1.0069  | <a href="#">TVMVVKVMLTNGGQIRIMNVVQR</a>     |                       |
| 3.4   | 2490.2934 | 2.0095  | <a href="#">MEIKDQTKCAASVIGSNILLAR</a>      |                       |
| 3.2   | 2492.3098 | -0.0068 | <a href="#">FNSTLFGLGLAAMVTL DQGVAVPR</a>   |                       |

Mascot: <http://www.matrixscience.com/>

# MATRIX SCIENCE Mascot Search Results

## Peptide View

MS/MS Fragmentation of **KCGNCSLTLK**

Found in **D6REX5** in **con\_Xuniprot\_HUMAN3**, D6REX5\_HUMAN Selenoprotein P (Fragment) OS=Homo sapiens GN=SEPP1 PE=4 SV=1

Match to Query 1837: 1281.608868 from(641.811710,2+) intensity(12976.4551) rtinseconds(374) scans(653) index(15573)

Title: 111019\_Est\_MI\_YP\_G\_05Spectrum529\_scans\_653

Data file C:\mascot\20140703\_Tmgf\_1D\CSV\_UseAnalysis\MasterCSV\All\_Glyco\mgf\ptm\UC18ERLIC\_PTM\_35D.mgf

Click mouse within plot area to zoom in by factor of two about that point

Or, to Da

Label all possible matches Label matches used for scoring

Show Y-axis

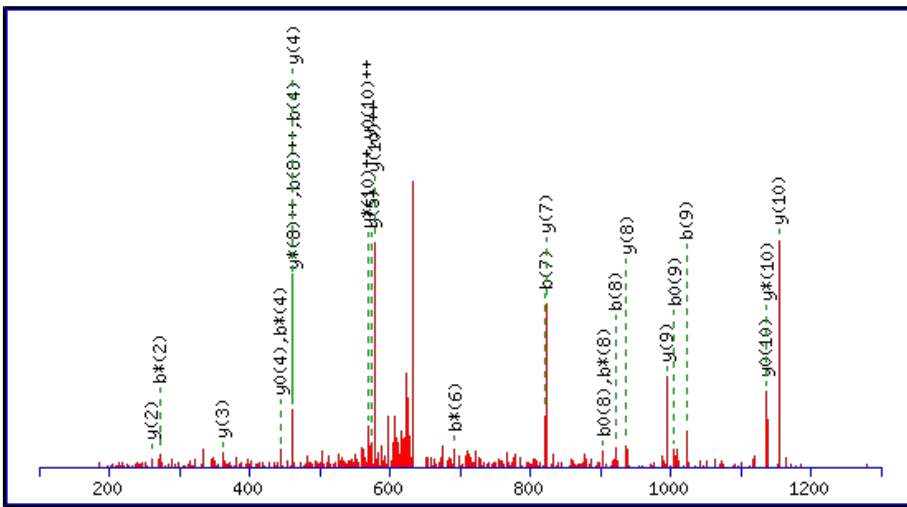

Monoisotopic mass of neutral peptide  $M_r(\text{calc})$ : 1281.6057

Fixed modifications: Carbamidomethyl (C) (apply to specified residues or termini only)

Variable modifications:

N4 : Deamidated (NQ)

Ions Score: 51 Expect: 0.0016

Matches : 28/106 fragment ions using 42 most intense peaks ([help](#))

| #  | b         | b <sup>++</sup> | b <sup>*</sup> | b <sup>+++</sup> | b <sup>0</sup> | b <sup>0++</sup> | Seq. | y         | y <sup>++</sup> | y <sup>*</sup> | y <sup>+++</sup> | y <sup>0</sup> | y <sup>0++</sup> | #  |
|----|-----------|-----------------|----------------|------------------|----------------|------------------|------|-----------|-----------------|----------------|------------------|----------------|------------------|----|
| 1  | 129.1022  | 65.0548         | 112.0757       | 56.5415          |                |                  | K    |           |                 |                |                  |                |                  | 11 |
| 2  | 289.1329  | 145.0701        | 272.1063       | 136.5568         |                |                  | C    | 1154.5180 | 577.7626        | 1137.4915      | 569.2494         | 1136.5075      | 568.7574         | 10 |
| 3  | 346.1544  | 173.5808        | 329.1278       | 165.0675         |                |                  | G    | 994.4874  | 497.7473        | 977.4608       | 489.2341         | 976.4768       | 488.7420         | 9  |
| 4  | 461.1813  | 231.0943        | 444.1547       | 222.5810         |                |                  | N    | 937.4659  | 469.2366        | 920.4394       | 460.7233         | 919.4553       | 460.2313         | 8  |
| 5  | 621.2119  | 311.1096        | 604.1854       | 302.5963         |                |                  | C    | 822.4390  | 411.7231        | 805.4124       | 403.2098         | 804.4284       | 402.7178         | 7  |
| 6  | 708.2440  | 354.6256        | 691.2174       | 346.1123         | 690.2334       | 345.6203         | S    | 662.4083  | 331.7078        | 645.3818       | 323.1945         | 644.3978       | 322.7025         | 6  |
| 7  | 821.3280  | 411.1677        | 804.3015       | 402.6544         | 803.3175       | 402.1624         | L    | 575.3763  | 288.1918        | 558.3497       | 279.6785         | 557.3657       | 279.1865         | 5  |
| 8  | 922.3757  | 461.6915        | 905.3492       | 453.1782         | 904.3652       | 452.6862         | T    | 462.2922  | 231.6498        | 445.2657       | 223.1365         | 444.2817       | 222.6445         | 4  |
| 9  | 1023.4234 | 512.2153        | 1006.3968      | 503.7021         | 1005.4128      | 503.2101         | T    | 361.2445  | 181.1259        | 344.2180       | 172.6126         | 343.2340       | 172.1206         | 3  |
| 10 | 1136.5075 | 568.7574        | 1119.4809      | 560.2441         | 1118.4969      | 559.7521         | L    | 260.1969  | 130.6021        | 243.1703       | 122.0888         |                |                  | 2  |
| 11 |           |                 |                |                  |                |                  | K    | 147.1128  | 74.0600         | 130.0863       | 65.5468          |                |                  | 1  |

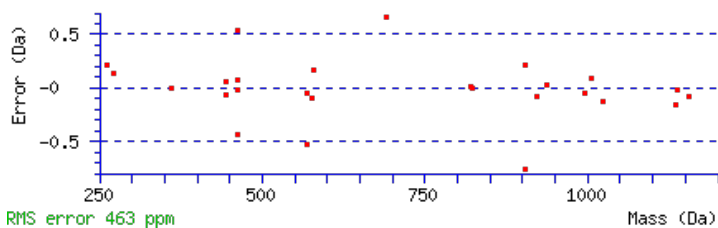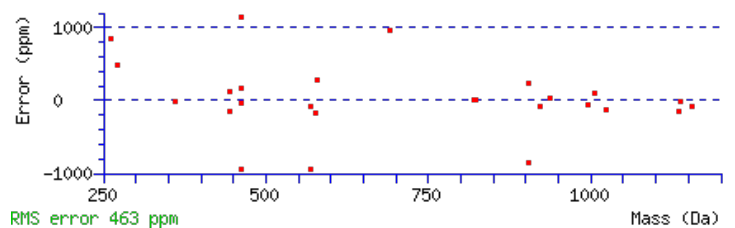

NCBI BLAST search of [KCGNCSLTLK](#)

(Parameters: blastp, nr protein database, expect=20000, no filter, PAM30)

Other BLAST [web gateways](#)

**All matches to this query**

| Score | Mr(calc)  | Delta   | Sequence                     |
|-------|-----------|---------|------------------------------|
| 50.6  | 1281.6057 | 0.0032  | <a href="#">KCGNCSLTTLK</a>  |
| 16.4  | 1281.6135 | -0.0047 | <a href="#">QCATNQYLRK</a>   |
| 13.1  | 1281.6131 | -0.0042 | <a href="#">AGDSLVMVIAMK</a> |
| 9.1   | 1281.6135 | -0.0047 | <a href="#">QCATNQYLRK</a>   |
| 8.1   | 1281.6070 | 0.0018  | <a href="#">KCHEKACPPR</a>   |
| 8.1   | 1281.6131 | -0.0042 | <a href="#">AGDSLVMVIAMK</a> |
| 7.4   | 1281.6088 | 0.0000  | <a href="#">SQEDTEAVFKK</a>  |
| 6.7   | 1281.6122 | -0.0033 | <a href="#">TQITTMESNLK</a>  |
| 6.7   | 1281.6089 | 0.0000  | <a href="#">QVFESEIEDSTK</a> |
| 6.2   | 1281.6135 | -0.0047 | <a href="#">QCATNQYLRK</a>   |

**Mascot:** <http://www.matrixscience.com/>

# MATRIX SCIENCE Mascot Search Results

## Peptide View

MS/MS Fragmentation of **KCGNCSLTTLKDEDFCK**

Found in **D6REX5** in **con\_Xuniprot\_HUMAN3**, D6REX5\_HUMAN Selenoprotein P (Fragment) OS=Homo sapiens GN=SEPP1 PE=4 SV=1

Match to Query 13131: 2075.903172 from(692.975000,3+) intensity(18309.2363) rtinseconds(734) scans(1759) index(23812)

Title: 111019\_Est\_MI\_YS\_G\_05Spectrum1487\_scans\_1759

Data file C:\mascot\20140703\_Tmgf\_1D\CSV\_UseAnalysis\MasterCSV\All\_Glyco\mgf\ptm\UC18ERLIC\_PTM\_35D.mgf

Click mouse within plot area to zoom in by factor of two about that point

Or, to Da

Label all possible matches Label matches used for scoring

Show Y-axis

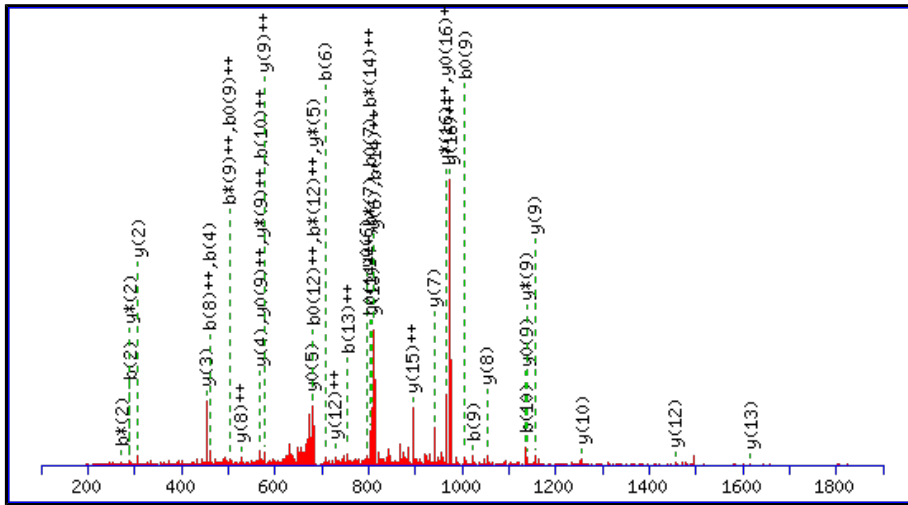

Monoisotopic mass of neutral peptide Mr(calc): 2075.8962

Fixed modifications: Carbamidomethyl (C) (apply to specified residues or termini only)

Variable modifications:

N4 : Deamidated (NQ)

Ions Score: 42 Expect: 0.0043

Matches : 46/176 fragment ions using 77 most intense peaks ([help](#))

| #  | b                | b <sup>++</sup> | b <sup>*</sup>  | b <sup>***</sup> | b <sup>0</sup>   | b <sup>0++</sup> | Seq.     | y                | y <sup>++</sup> | y <sup>*</sup>   | y <sup>***</sup> | y <sup>0</sup>   | y <sup>0++</sup> | #  |
|----|------------------|-----------------|-----------------|------------------|------------------|------------------|----------|------------------|-----------------|------------------|------------------|------------------|------------------|----|
| 1  | 129.1022         | 65.0548         | 112.0757        | 56.5415          |                  |                  | <b>K</b> |                  |                 |                  |                  |                  |                  | 17 |
| 2  | <b>289.1329</b>  | 145.0701        | <b>272.1063</b> | 136.5568         |                  |                  | <b>C</b> | 1948.8085        | <b>974.9079</b> | 1931.7820        | <b>966.3946</b>  | 1930.7980        | <b>965.9026</b>  | 16 |
| 3  | 346.1544         | 173.5808        | 329.1278        | 165.0675         |                  |                  | <b>G</b> | 1788.7779        | <b>894.8926</b> | 1771.7513        | 886.3793         | 1770.7673        | 885.8873         | 15 |
| 4  | <b>461.1813</b>  | 231.0943        | 444.1547        | 222.5810         |                  |                  | <b>N</b> | 1731.7564        | 866.3818        | 1714.7299        | 857.8686         | 1713.7459        | 857.3766         | 14 |
| 5  | 621.2119         | 311.1096        | 604.1854        | 302.5963         |                  |                  | <b>C</b> | <b>1616.7295</b> | <b>808.8684</b> | 1599.7029        | 800.3551         | 1598.7189        | 799.8631         | 13 |
| 6  | <b>708.2440</b>  | 354.6256        | 691.2174        | 346.1123         | 690.2334         | 345.6203         | <b>S</b> | <b>1456.6988</b> | <b>728.8530</b> | 1439.6723        | 720.3398         | 1438.6883        | 719.8478         | 12 |
| 7  | 821.3280         | 411.1677        | <b>804.3015</b> | 402.6544         | <b>803.3175</b>  | 402.1624         | <b>L</b> | 1369.6668        | 685.3370        | 1352.6402        | 676.8238         | 1351.6562        | 676.3318         | 11 |
| 8  | 922.3757         | <b>461.6915</b> | 905.3492        | 453.1782         | 904.3652         | 452.6862         | <b>T</b> | <b>1256.5827</b> | 628.7950        | 1239.5562        | 620.2817         | 1238.5722        | 619.7897         | 10 |
| 9  | <b>1023.4234</b> | 512.2153        | 1006.3968       | <b>503.7021</b>  | <b>1005.4128</b> | <b>503.2101</b>  | <b>T</b> | <b>1155.5351</b> | <b>578.2712</b> | <b>1138.5085</b> | <b>569.7579</b>  | <b>1137.5245</b> | <b>569.2659</b>  | 9  |
| 10 | <b>1136.5075</b> | <b>568.7574</b> | 1119.4809       | 560.2441         | 1118.4969        | 559.7521         | <b>L</b> | <b>1054.4874</b> | <b>527.7473</b> | 1037.4608        | 519.2341         | 1036.4768        | 518.7420         | 8  |
| 11 | 1264.6024        | 632.8048        | 1247.5759       | 624.2916         | 1246.5919        | 623.7996         | <b>K</b> | <b>941.4033</b>  | 471.2053        | 924.3768         | 462.6920         | 923.3927         | 462.2000         | 7  |
| 12 | 1379.6294        | 690.3183        | 1362.6028       | <b>681.8050</b>  | 1361.6188        | <b>681.3130</b>  | <b>D</b> | <b>813.3083</b>  | 407.1578        | 796.2818         | 398.6445         | <b>795.2978</b>  | 398.1525         | 6  |
| 13 | 1508.6720        | <b>754.8396</b> | 1491.6454       | 746.3263         | 1490.6614        | 745.8343         | <b>E</b> | 698.2814         | 349.6443        | <b>681.2549</b>  | 341.1311         | <b>680.2708</b>  | 340.6391         | 5  |
| 14 | 1623.6989        | <b>812.3531</b> | 1606.6724       | <b>803.8398</b>  | 1605.6883        | <b>803.3478</b>  | <b>D</b> | <b>569.2388</b>  | 285.1230        | 552.2123         | 276.6098         | 551.2282         | 276.1178         | 4  |
| 15 | 1770.7673        | 885.8873        | 1753.7408       | 877.3740         | 1752.7567        | 876.8820         | <b>F</b> | <b>454.2119</b>  | 227.6096        | 437.1853         | 219.0963         |                  |                  | 3  |
| 16 | 1930.7980        | <b>965.9026</b> | 1913.7714       | 957.3893         | 1912.7874        | 956.8973         | <b>C</b> | <b>307.1435</b>  | 154.0754        | <b>290.1169</b>  | 145.5621         |                  |                  | 2  |
| 17 |                  |                 |                 |                  |                  |                  | <b>K</b> | 147.1128         | 74.0600         | 130.0863         | 65.5468          |                  |                  | 1  |

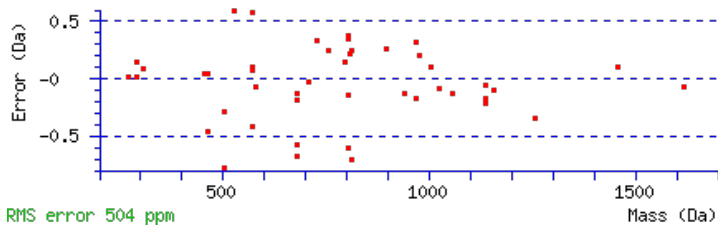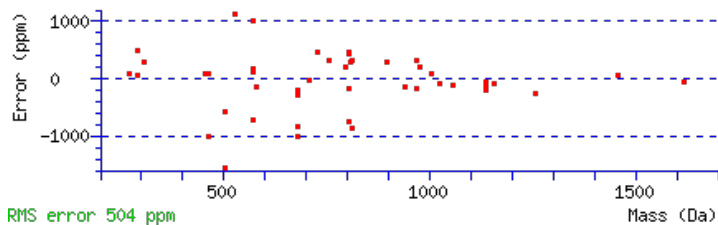

NCBI **BLAST** search of [KCGNCSLTTLKDEDFCK](#)

(Parameters: blastp, nr protein database, expect=20000, no filter, PAM30)

Other BLAST [web gateways](#)

**All matches to this query**

| Score | Mr(calc)  | Delta   | Sequence                            |
|-------|-----------|---------|-------------------------------------|
| 42.3  | 2075.8962 | 0.0070  | <a href="#">KCGNCSLTTLKDEDFCK</a>   |
| 4.4   | 2074.9064 | 0.9968  | <a href="#">MTGGPVMFRQGAGGAWLCF</a> |
| 1.6   | 2073.9016 | 2.0015  | <a href="#">SNLMGMELDNECSKAKSK</a>  |
| 0.8   | 2075.9119 | -0.0087 | <a href="#">FPELNNGGHSYCRNPGNQK</a> |
| 0.8   | 2075.9119 | -0.0087 | <a href="#">FPELNNGGHSYCRNPGNQK</a> |
| 0.5   | 2075.8993 | 0.0038  | <a href="#">QLNPLHSGDIENDMFAEK</a>  |
| 0.4   | 2075.9081 | -0.0049 | <a href="#">LAKEHNSCYEEYVCFK</a>    |
| 0.1   | 2075.9119 | -0.0087 | <a href="#">FPELNNGGHSYCRNPGNQK</a> |
| 0.1   | 2075.9119 | -0.0087 | <a href="#">FPELNNGGHSYCRNPGNQK</a> |
| 0.1   | 2075.9119 | -0.0087 | <a href="#">FPELNNGGHSYCRNPGNQK</a> |

Mascot: <http://www.matrixscience.com/>



# MASCOT SCIENCE Mascot Search Results

## Peptide View

MS/MS Fragmentation of **CGNCSLTTLKDEDFCK**

Found in **D6REX5** in **con\_Xuniprot\_HUMAN3**, D6REX5\_HUMAN Selenoprotein P (Fragment) OS=Homo sapiens GN=SEPP1 PE=4 SV=1

Match to Query 11739: 1947.804402 from(650.275410,3+) intensity(17876.1191) rtinseconds(966) scans(2222) index(25231)

Title: 111019\_Est\_MI\_YS\_G\_07Spectrum1874\_scans\_2222

Data file C:\mascot\20140703\_Tmgf\_1D\CSV\_UseAnalysis\MasterCSV\All\_Glyco\mgf\ptm\UC18ERLIC\_PTM\_35D.mgf

Click mouse within plot area to zoom in by factor of two about that point

Or, to Da

Label all possible matches Label matches used for scoring

Show Y-axis

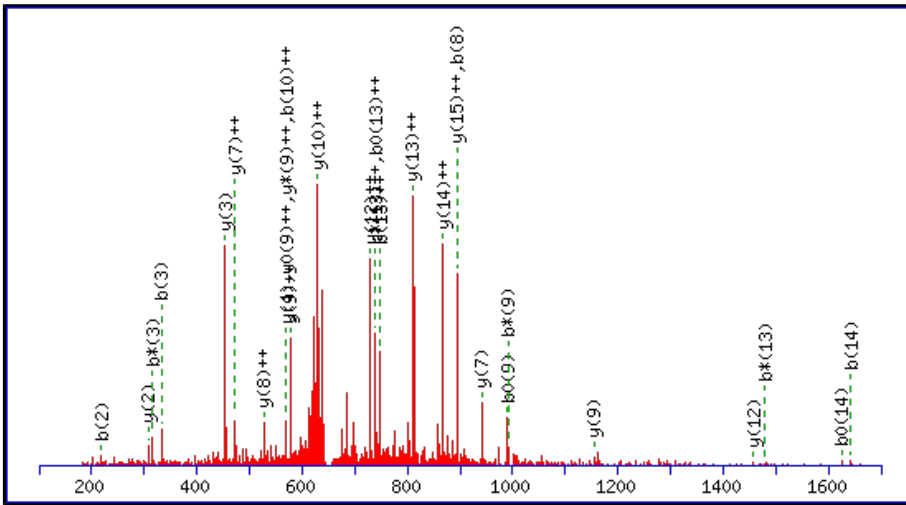

Monoisotopic mass of neutral peptide Mr(calc): 1947.8013

Fixed modifications: Carbamidomethyl (C) (apply to specified residues or termini only)

Variable modifications:

N3 : Deamidated (NQ)

Ions Score: 42 Expect: 0.0028

Matches : 29/162 fragment ions using 45 most intense peaks ([help](#))

| #  | b                | b <sup>++</sup> | b <sup>*</sup>   | b <sup>*++</sup> | b <sup>0</sup>   | b <sup>0++</sup> | Seq. | y                | y <sup>++</sup> | y <sup>*</sup> | y <sup>*++</sup> | y <sup>0</sup> | y <sup>0++</sup> | #  |
|----|------------------|-----------------|------------------|------------------|------------------|------------------|------|------------------|-----------------|----------------|------------------|----------------|------------------|----|
| 1  | 161.0379         | 81.0226         |                  |                  |                  |                  | C    |                  |                 |                |                  |                |                  | 16 |
| 2  | <b>218.0594</b>  | 109.5333        |                  |                  |                  |                  | G    | 1788.7779        | <b>894.8926</b> | 1771.7513      | 886.3793         | 1770.7673      | 885.8873         | 15 |
| 3  | <b>333.0863</b>  | 167.0468        | <b>316.0598</b>  | 158.5335         |                  |                  | N    | 1731.7564        | <b>866.3818</b> | 1714.7299      | 857.8686         | 1713.7459      | 857.3766         | 14 |
| 4  | 493.1170         | 247.0621        | 476.0904         | 238.5489         |                  |                  | C    | 1616.7295        | <b>808.8684</b> | 1599.7029      | 800.3551         | 1598.7189      | 799.8631         | 13 |
| 5  | 580.1490         | 290.5781        | 563.1225         | 282.0649         | 562.1384         | 281.5729         | S    | <b>1456.6988</b> | <b>728.8530</b> | 1439.6723      | 720.3398         | 1438.6883      | 719.8478         | 12 |
| 6  | 693.2331         | 347.1202        | 676.2065         | 338.6069         | 675.2225         | 338.1149         | L    | 1369.6668        | 685.3370        | 1352.6402      | 676.8238         | 1351.6562      | 676.3318         | 11 |
| 7  | 794.2808         | 397.6440        | 777.2542         | 389.1307         | 776.2702         | 388.6387         | T    | 1256.5827        | <b>628.7950</b> | 1239.5562      | 620.2817         | 1238.5722      | 619.7897         | 10 |
| 8  | <b>895.3284</b>  | 448.1679        | 878.3019         | 439.6546         | 877.3179         | 439.1626         | T    | <b>1155.5351</b> | <b>578.2712</b> | 1138.5085      | <b>569.7579</b>  | 1137.5245      | <b>569.2659</b>  | 9  |
| 9  | 1008.4125        | 504.7099        | <b>991.3859</b>  | 496.1966         | <b>990.4019</b>  | 495.7046         | L    | 1054.4874        | <b>527.7473</b> | 1037.4608      | 519.2341         | 1036.4768      | 518.7420         | 8  |
| 10 | 1136.5075        | <b>568.7574</b> | 1119.4809        | 560.2441         | 1118.4969        | 559.7521         | K    | <b>941.4033</b>  | <b>471.2053</b> | 924.3768       | 462.6920         | 923.3927       | 462.2000         | 7  |
| 11 | 1251.5344        | 626.2708        | 1234.5079        | 617.7576         | 1233.5238        | 617.2656         | D    | 813.3083         | 407.1578        | 796.2818       | 398.6445         | 795.2978       | 398.1525         | 6  |
| 12 | 1380.5770        | 690.7921        | 1363.5504        | 682.2789         | 1362.5664        | 681.7869         | E    | 698.2814         | 349.6443        | 681.2549       | 341.1311         | 680.2708       | 340.6391         | 5  |
| 13 | 1495.6039        | <b>748.3056</b> | <b>1478.5774</b> | <b>739.7923</b>  | 1477.5934        | <b>739.3003</b>  | D    | <b>569.2388</b>  | 285.1230        | 552.2123       | 276.6098         | 551.2282       | 276.1178         | 4  |
| 14 | <b>1642.6724</b> | 821.8398        | 1625.6458        | 813.3265         | <b>1624.6618</b> | 812.8345         | F    | <b>454.2119</b>  | 227.6096        | 437.1853       | 219.0963         |                |                  | 3  |
| 15 | 1802.7030        | 901.8551        | 1785.6765        | 893.3419         | 1784.6924        | 892.8499         | C    | <b>307.1435</b>  | 154.0754        | 290.1169       | 145.5621         |                |                  | 2  |
| 16 |                  |                 |                  |                  |                  |                  | K    | 147.1128         | 74.0600         | 130.0863       | 65.5468          |                |                  | 1  |

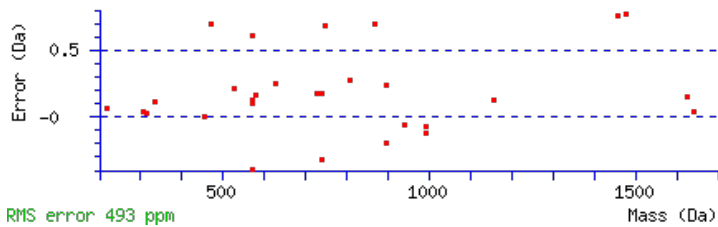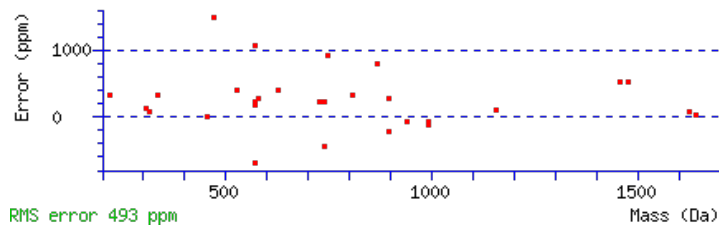

NCBI **BLAST** search of [CGNCSLTTLKDEDFCK](#)

(Parameters: blastp, nr protein database, expect=20000, no filter, PAM30)

Other BLAST [web gateways](#)

**All matches to this query**

| Score | Mr(calc)  | Delta  | Sequence                         |
|-------|-----------|--------|----------------------------------|
| 41.7  | 1947.8013 | 0.0031 | <a href="#">CGNCSLTTLKDEDFCK</a> |
| 6.7   | 1947.8012 | 0.0032 | <a href="#">TMMNQEGSLVEMQFNR</a> |
| 6.7   | 1947.8012 | 0.0032 | <a href="#">TMMNQEGSLVEMQFNR</a> |
| 3.2   | 1947.7965 | 0.0079 | <a href="#">EQEMQECTTQIQYLK</a>  |

Mascot: <http://www.matrixscience.com/>

# MASCOT SCIENCE Mascot Search Results

## Peptide View

MS/MS Fragmentation of **CGNCSLTTLKDEDFCKR**

Found in **D6REX5** in **con\_Xuniprot\_HUMAN3**, D6REX5\_HUMAN Selenoprotein P (Fragment) OS=Homo sapiens GN=SEPP1 PE=4 SV=1

Match to Query 13897: 2103.909732 from(702.310520,3+) intensity(8137.7930) rtinseconds(817) scans(1840) index(23089)

Title: 111019\_Est\_MI\_YS\_G\_04Spectrum1537\_scans\_1840

Data file C:\mascot\20140703\_Tmgf\_1D\CSV\_UseAnalysis\MasterCSV\All\_Glyco\mgf\ptm\UC18ERLIC\_PTM\_35D.mgf

Click mouse within plot area to zoom in by factor of two about that point

Or, to Da

Label all possible matches Label matches used for scoring

Show Y-axis

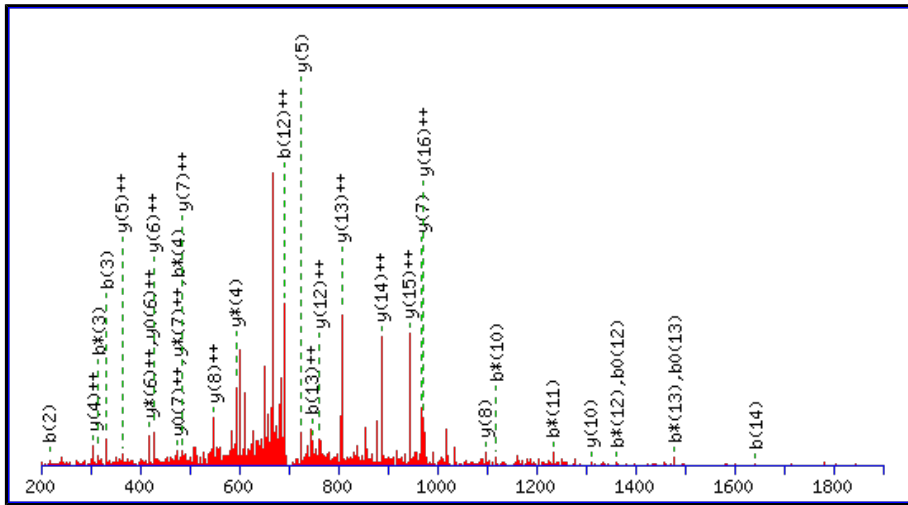

Monoisotopic mass of neutral peptide  $M_r(\text{calc})$ : 2103.9024

Fixed modifications: Carbamidomethyl (C) (apply to specified residues or termini only)

Variable modifications:

N3 : Deamidated (NQ)

Ions Score: 41 Expect: 0.0056

Matches : 32/172 fragment ions using 61 most intense peaks ([help](#))

| #  | b                | b <sup>++</sup> | b <sup>*</sup>   | b <sup>***</sup> | b <sup>0</sup>   | b <sup>0++</sup> | Seq. | y                | y <sup>++</sup> | y <sup>*</sup>  | y <sup>***</sup> | y <sup>0</sup> | y <sup>0++</sup> | #  |
|----|------------------|-----------------|------------------|------------------|------------------|------------------|------|------------------|-----------------|-----------------|------------------|----------------|------------------|----|
| 1  | 161.0379         | 81.0226         |                  |                  |                  |                  | C    |                  |                 |                 |                  |                |                  | 17 |
| 2  | <b>218.0594</b>  | 109.5333        |                  |                  |                  |                  | G    | 1944.8790        | <b>972.9431</b> | 1927.8524       | 964.4299         | 1926.8684      | 963.9379         | 16 |
| 3  | <b>333.0863</b>  | 167.0468        | <b>316.0598</b>  | 158.5335         |                  |                  | N    | 1887.8575        | <b>944.4324</b> | 1870.8310       | 935.9191         | 1869.8470      | 935.4271         | 15 |
| 4  | 493.1170         | 247.0621        | <b>476.0904</b>  | 238.5489         |                  |                  | C    | 1772.8306        | <b>886.9189</b> | 1755.8040       | 878.4057         | 1754.8200      | 877.9136         | 14 |
| 5  | 580.1490         | 290.5781        | 563.1225         | 282.0649         | 562.1384         | 281.5729         | S    | 1612.7999        | <b>806.9036</b> | 1595.7734       | 798.3903         | 1594.7894      | 797.8983         | 13 |
| 6  | 693.2331         | 347.1202        | 676.2065         | 338.6069         | 675.2225         | 338.1149         | L    | 1525.7679        | <b>763.3876</b> | 1508.7414       | 754.8743         | 1507.7573      | 754.3823         | 12 |
| 7  | 794.2808         | 397.6440        | 777.2542         | 389.1307         | 776.2702         | 388.6387         | T    | 1412.6838        | 706.8456        | 1395.6573       | 698.3323         | 1394.6733      | 697.8403         | 11 |
| 8  | 895.3284         | 448.1679        | 878.3019         | 439.6546         | 877.3179         | 439.1626         | T    | <b>1311.6362</b> | 656.3217        | 1294.6096       | 647.8084         | 1293.6256      | 647.3164         | 10 |
| 9  | 1008.4125        | 504.7099        | 991.3859         | 496.1966         | 990.4019         | 495.7046         | L    | 1210.5885        | 605.7979        | 1193.5619       | 597.2846         | 1192.5779      | 596.7926         | 9  |
| 10 | 1136.5075        | 568.7574        | <b>1119.4809</b> | 560.2441         | 1118.4969        | 559.7521         | K    | <b>1097.5044</b> | <b>549.2558</b> | 1080.4779       | 540.7426         | 1079.4939      | 540.2506         | 8  |
| 11 | 1251.5344        | 626.2708        | <b>1234.5079</b> | 617.7576         | 1233.5238        | 617.2656         | D    | <b>969.4095</b>  | <b>485.2084</b> | 952.3829        | <b>476.6951</b>  | 951.3989       | <b>476.2031</b>  | 7  |
| 12 | 1380.5770        | <b>690.7921</b> | <b>1363.5504</b> | 682.2789         | <b>1362.5664</b> | 681.7869         | E    | 854.3825         | <b>427.6949</b> | 837.3560        | <b>419.1816</b>  | 836.3719       | <b>418.6896</b>  | 6  |
| 13 | 1495.6039        | <b>748.3056</b> | <b>1478.5774</b> | 739.7923         | <b>1477.5934</b> | 739.3003         | D    | <b>725.3399</b>  | <b>363.1736</b> | 708.3134        | 354.6603         | 707.3294       | 354.1683         | 5  |
| 14 | <b>1642.6724</b> | 821.8398        | 1625.6458        | 813.3265         | 1624.6618        | 812.8345         | F    | 610.3130         | <b>305.6601</b> | <b>593.2864</b> | 297.1469         |                |                  | 4  |
| 15 | 1802.7030        | 901.8551        | 1785.6765        | 893.3419         | 1784.6924        | 892.8499         | C    | 463.2446         | 232.1259        | 446.2180        | 223.6126         |                |                  | 3  |
| 16 | 1930.7980        | 965.9026        | 1913.7714        | 957.3893         | 1912.7874        | 956.8973         | K    | 303.2139         | 152.1106        | 286.1874        | 143.5973         |                |                  | 2  |
| 17 |                  |                 |                  |                  |                  |                  | R    | 175.1190         | 88.0631         | 158.0924        | 79.5498          |                |                  | 1  |

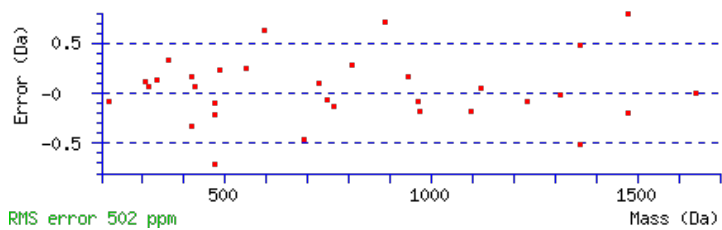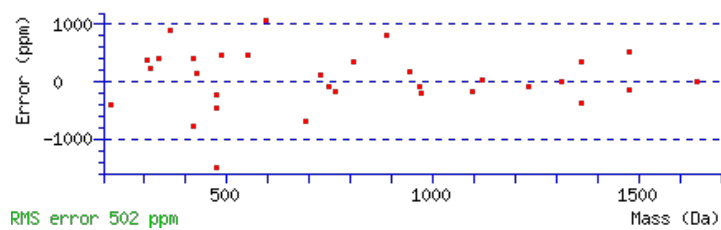

NCBI **BLAST** search of [CGNCSLTTLKDEDFCKR](#)

(Parameters: blastp, nr protein database, expect=20000, no filter, PAM30)

Other BLAST [web gateways](#)

**All matches to this query**

| Score | Mr(calc)  | Delta  | Sequence                          |
|-------|-----------|--------|-----------------------------------|
| 41.4  | 2103.9024 | 0.0074 | <a href="#">CGNCSLTTLKDEDFCKR</a> |

Mascot: <http://www.matrixscience.com/>

# MASCOT SCIENCE Mascot Search Results

## Peptide View

MS/MS Fragmentation of **EQEAAMEIQEPAANK**

Found in **E7ER40** in **con\_Xuniprot\_HUMAN3**, E7ER40\_HUMAN PHD finger protein 3 (Fragment) OS=Homo sapiens GN=PHF3 PE=2 SV=1

Match to Query 8409: 1661.721132 from(554.914320,3+) intensity(2891.4273) rtinseconds(523) scans(859) index(28331)

Title: 111019\_Est\_MI\_YS\_G\_13Spectrum686\_scans\_859

Data file C:\mascot\20140703\_Tmgf\_1D\CSV\_UseAnalysis\MasterCSV\All\_Glyco\mgf\ptm\UC18ERLIC\_PTM\_35D.mgf

Click mouse within plot area to zoom in by factor of two about that point

Or, to Da

Label all possible matches Label matches used for scoring

Show Y-axis

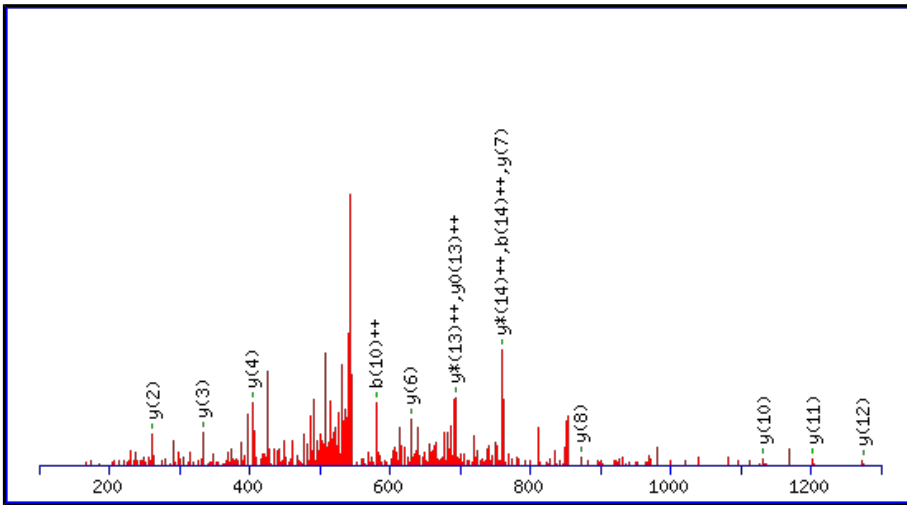

Monoisotopic mass of neutral peptide Mr(calc): 1660.7137

Fixed modifications: Carbamidomethyl (C) (apply to specified residues or termini only)

Variable modifications:

Q2 : Deamidated (NQ)

Q9 : Deamidated (NQ)

N14 : Deamidated (NQ)

Ions Score: 48 Expect: 0.00095

Matches : 14/156 fragment ions using 24 most intense peaks ([help](#))

| #  | b         | b <sup>++</sup> | b <sup>*</sup> | b <sup>*++</sup> | b <sup>0</sup> | b <sup>0++</sup> | Seq. | y         | y <sup>++</sup> | y <sup>*</sup> | y <sup>*++</sup> | y <sup>0</sup> | y <sup>0++</sup> | #  |
|----|-----------|-----------------|----------------|------------------|----------------|------------------|------|-----------|-----------------|----------------|------------------|----------------|------------------|----|
| 1  | 130.0499  | 65.5286         |                |                  | 112.0393       | 56.5233          | E    |           |                 |                |                  |                |                  | 15 |
| 2  | 259.0925  | 130.0499        | 242.0659       | 121.5366         | 241.0819       | 121.0446         | Q    | 1532.6785 | 766.8429        | 1515.6519      | 758.3296         | 1514.6679      | 757.8376         | 14 |
| 3  | 388.1351  | 194.5712        | 371.1085       | 186.0579         | 370.1245       | 185.5659         | E    | 1403.6359 | 702.3216        | 1386.6093      | 693.8083         | 1385.6253      | 693.3163         | 13 |
| 4  | 459.1722  | 230.0897        | 442.1456       | 221.5764         | 441.1616       | 221.0844         | A    | 1274.5933 | 637.8003        | 1257.5667      | 629.2870         | 1256.5827      | 628.7950         | 12 |
| 5  | 530.2093  | 265.6083        | 513.1827       | 257.0950         | 512.1987       | 256.6030         | A    | 1203.5562 | 602.2817        | 1186.5296      | 593.7685         | 1185.5456      | 593.2764         | 11 |
| 6  | 661.2498  | 331.1285        | 644.2232       | 322.6152         | 643.2392       | 322.1232         | M    | 1132.5191 | 566.7632        | 1115.4925      | 558.2499         | 1114.5085      | 557.7579         | 10 |
| 7  | 790.2924  | 395.6498        | 773.2658       | 387.1365         | 772.2818       | 386.6445         | E    | 1001.4786 | 501.2429        | 984.4520       | 492.7297         | 983.4680       | 492.2376         | 9  |
| 8  | 903.3764  | 452.1919        | 886.3499       | 443.6786         | 885.3659       | 443.1866         | I    | 872.4360  | 436.7216        | 855.4094       | 428.2084         | 854.4254       | 427.7164         | 8  |
| 9  | 1032.4190 | 516.7131        | 1015.3925      | 508.1999         | 1014.4085      | 507.7079         | Q    | 759.3519  | 380.1796        | 742.3254       | 371.6663         | 741.3414       | 371.1743         | 7  |
| 10 | 1161.4616 | 581.2344        | 1144.4351      | 572.7212         | 1143.4510      | 572.2292         | E    | 630.3093  | 315.6583        | 613.2828       | 307.1450         | 612.2988       | 306.6530         | 6  |
| 11 | 1258.5144 | 629.7608        | 1241.4878      | 621.2476         | 1240.5038      | 620.7555         | P    | 501.2667  | 251.1370        | 484.2402       | 242.6237         |                |                  | 5  |
| 12 | 1329.5515 | 665.2794        | 1312.5249      | 656.7661         | 1311.5409      | 656.2741         | A    | 404.2140  | 202.6106        | 387.1874       | 194.0974         |                |                  | 4  |
| 13 | 1400.5886 | 700.7979        | 1383.5621      | 692.2847         | 1382.5780      | 691.7927         | A    | 333.1769  | 167.0921        | 316.1503       | 158.5788         |                |                  | 3  |
| 14 | 1515.6155 | 758.3114        | 1498.5890      | 749.7981         | 1497.6050      | 749.3061         | N    | 262.1397  | 131.5735        | 245.1132       | 123.0602         |                |                  | 2  |
| 15 |           |                 |                |                  |                |                  | K    | 147.1128  | 74.0600         | 130.0863       | 65.5468          |                |                  | 1  |

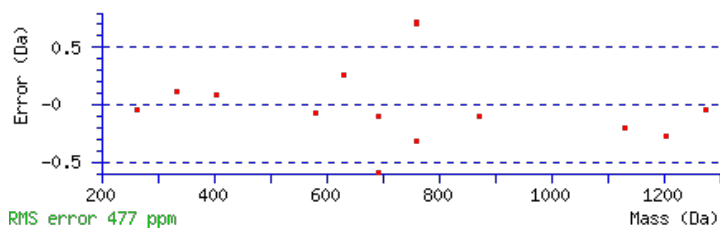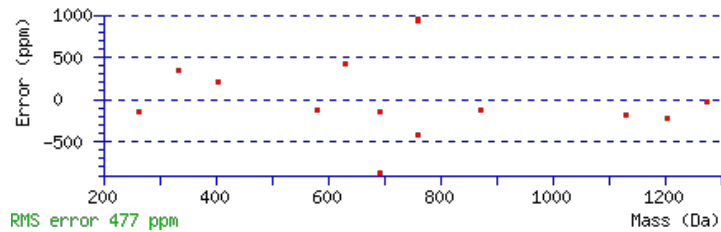

NCBI BLAST search of [EQEAAMEIQEPAANK](#)

(Parameters: blastp, nr protein database, expect=20000, no filter, PAM30)

Other BLAST [web gateways](#)

**All matches to this query**

| Score | Mr(calc)  | Delta   | Sequence                        |
|-------|-----------|---------|---------------------------------|
| 48.2  | 1660.7137 | 1.0074  | <a href="#">EQEAAMEIQEPAANK</a> |
| 33.1  | 1661.7178 | 0.0034  | <a href="#">YKAAFTECCQAADK</a>  |
| 5.3   | 1660.7191 | 1.0020  | <a href="#">YKQSGGWNGTWMTK</a>  |
| 2.6   | 1659.7199 | 2.0012  | <a href="#">GEQFPFGHMTESDTK</a> |
| 2.5   | 1661.7290 | -0.0079 | <a href="#">CGDQPRHFALAMDK</a>  |
| 2.3   | 1661.7243 | -0.0031 | <a href="#">DRMEYVYEEVANK</a>   |
| 1.4   | 1661.7276 | -0.0065 | <a href="#">QFSSMESVKNMVNK</a>  |
| 1.1   | 1660.7138 | 1.0074  | <a href="#">DQIAYSATSMDLSDK</a> |
| 1.1   | 1660.7138 | 1.0074  | <a href="#">NOIAYSATSMDLSDK</a> |
| 0.8   | 1661.7251 | -0.0040 | <a href="#">NYWCILSMNGKMK</a>   |

Mascot: <http://www.matrixscience.com/>

# MATRIX SCIENCE Mascot Search Results

## Peptide View

MS/MS Fragmentation of **LVIQNANVSAMYK**

Found in **E9PD35** in **con\_Xuniprot\_HUMAN3**, E9PD35\_HUMAN Vascular endothelial growth factor receptor 3 OS=Homo sapiens  
GN=FLT4 PE=2 SV=1

Match to Query 6199: 1466.748588 from(734.381570,2+) intensity(23588.8145) rtinseconds(810) scans(1789) index(10797)

Title: 111019\_Est\_ISCardio\_NMI\_YS\_G\_7Spectrum1498\_scans\_\_1789

Data file C:\\mascot\\20140703\_Tmgf\_1D\\CSV\_UseAnalysis\\MasterCSV\\All\_Glyco\\mgf\\ptm\\UC18ERLIC\_PTM\_35D.mgf

Click mouse within plot area to zoom in by factor of two about that point

Or, to Da

Label all possible matches Label matches used for scoring

Show Y-axis

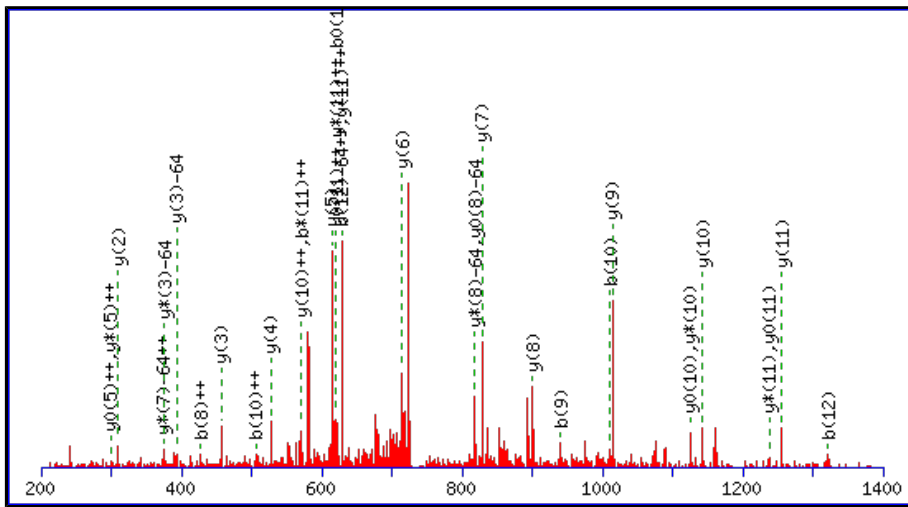

Monoisotopic mass of neutral peptide  $M_r(\text{calc})$ : 1466.7439

Fixed modifications: Carbamidomethyl (C) (apply to specified residues or termini only)

Variable modifications:

N7 : Deamidated (NQ)

M11 : Oxidation (M), with neutral losses 0.0000 (shown in table), 63.9983

Ions Score: 54 Expect: 0.00093

Matches : 33/182 fragment ions using 48 most intense peaks ([help](#))

| #  | b                | b <sup>++</sup> | b <sup>*</sup> | b <sup>*++</sup> | b <sup>0</sup> | b <sup>0++</sup> | Seq. | y                | y <sup>++</sup> | y <sup>*</sup>   | y <sup>*++</sup> | y <sup>0</sup>   | y <sup>0++</sup> | #  |
|----|------------------|-----------------|----------------|------------------|----------------|------------------|------|------------------|-----------------|------------------|------------------|------------------|------------------|----|
| 1  | 114.0913         | 57.5493         |                |                  |                |                  | L    |                  |                 |                  |                  |                  |                  | 13 |
| 2  | 213.1598         | 107.0835        |                |                  |                |                  | V    | 1354.6671        | 677.8372        | 1337.6406        | 669.3239         | 1336.6566        | 668.8319         | 12 |
| 3  | 326.2438         | 163.6255        |                |                  |                |                  | I    | <b>1255.5987</b> | <b>628.3030</b> | <b>1238.5722</b> | <b>619.7897</b>  | <b>1237.5882</b> | <b>619.2977</b>  | 11 |
| 4  | 454.3024         | 227.6548        | 437.2758       | 219.1416         |                |                  | Q    | <b>1142.5147</b> | <b>571.7610</b> | <b>1125.4881</b> | 563.2477         | <b>1124.5041</b> | 562.7557         | 10 |
| 5  | 568.3453         | 284.6763        | 551.3188       | 276.1630         |                |                  | N    | <b>1014.4561</b> | 507.7317        | 997.4295         | 499.2184         | 996.4455         | 498.7264         | 9  |
| 6  | 639.3824         | 320.1949        | 622.3559       | 311.6816         |                |                  | A    | <b>900.4131</b>  | 450.7102        | 883.3866         | 442.1969         | 882.4026         | 441.7049         | 8  |
| 7  | 754.4094         | 377.7083        | 737.3828       | 369.1951         |                |                  | N    | <b>829.3760</b>  | 415.1917        | 812.3495         | 406.6784         | 811.3655         | 406.1864         | 7  |
| 8  | 853.4778         | <b>427.2425</b> | 836.4512       | 418.7293         |                |                  | V    | <b>714.3491</b>  | 357.6782        | 697.3225         | 349.1649         | 696.3385         | 348.6729         | 6  |
| 9  | <b>940.5098</b>  | 470.7585        | 923.4833       | 462.2453         | 922.4993       | 461.7533         | S    | <b>615.2807</b>  | 308.1440        | 598.2541         | <b>299.6307</b>  | 597.2701         | <b>299.1387</b>  | 5  |
| 10 | <b>1011.5469</b> | <b>506.2771</b> | 994.5204       | 497.7638         | 993.5364       | 497.2718         | A    | <b>528.2486</b>  | 264.6280        | 511.2221         | 256.1147         |                  |                  | 4  |
| 11 | 1158.5823        | 579.7948        | 1141.5558      | <b>571.2815</b>  | 1140.5718      | 570.7895         | M    | <b>457.2115</b>  | 229.1094        | 440.1850         | 220.5961         |                  |                  | 3  |
| 12 | <b>1321.6457</b> | 661.3265        | 1304.6191      | 652.8132         | 1303.6351      | 652.3212         | Y    | <b>310.1761</b>  | 155.5917        | 293.1496         | 147.0784         |                  |                  | 2  |
| 13 |                  |                 |                |                  |                |                  | K    | 147.1128         | 74.0600         | 130.0863         | 65.5468          |                  |                  | 1  |



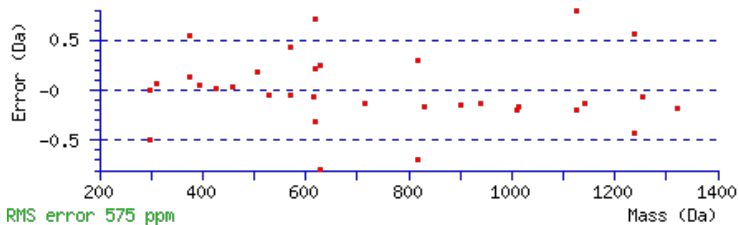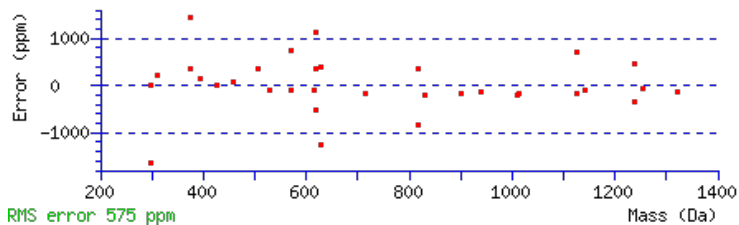

NCBI BLAST search of [LVIQNANVSAMYK](#)

(Parameters: blastp, nr protein database, expect=20000, no filter, PAM30)

Other BLAST [web gateways](#)

All matches to this query

| Score | Mr(calc)  | Delta  | Sequence                       | Site Analysis        |
|-------|-----------|--------|--------------------------------|----------------------|
| 53.9  | 1466.7439 | 0.0047 | <a href="#">LVIQNANVSAMYK</a>  | Deamidated N7 99.20% |
| 32.3  | 1466.7439 | 0.0047 | <a href="#">LVIQNANVSAMYK</a>  | Deamidated N5 0.70%  |
| 23.9  | 1466.7439 | 0.0047 | <a href="#">LVIQNANVSAMYK</a>  | Deamidated Q4 0.10%  |
| 7.8   | 1464.7381 | 2.0105 | <a href="#">KMTEIQVELETK</a>   |                      |
| 6.5   | 1464.7428 | 2.0057 | <a href="#">LKQCMQKQSIK</a>    |                      |
| 6.0   | 1464.7395 | 2.0091 | <a href="#">YKPNGQIEMKNK</a>   |                      |
| 4.3   | 1466.7473 | 0.0013 | <a href="#">MSADAMLKALLGSK</a> |                      |
| 4.2   | 1464.7395 | 2.0091 | <a href="#">FCKTTNTVEPLR</a>   |                      |
| 3.0   | 1466.7479 | 0.0007 | <a href="#">FLKSEMPVQFK</a>    |                      |
| 2.9   | 1464.7361 | 2.0125 | <a href="#">AFSFTTSLIGHQR</a>  |                      |

Mascot: <http://www.matrixscience.com/>

# MASCOT SCIENCE Mascot Search Results

## Peptide View

MS/MS Fragmentation of **ENLTAPGSDSAVFFEQGTTR**

Found in **E9PFZ2** in **con\_Xuniprot\_HUMAN3**, E9PFZ2\_HUMAN Ceruloplasmin OS=Homo sapiens GN=CP PE=2 SV=1

Match to Query 14344: 2126.985308 from(1064.499930,2+) intensity(119924.2266) rtinseconds(1528) scans(3588) index(15116)

Title: 111019\_Est\_MI\_YP\_G\_04Spectrum3066\_scans\_\_3588

Data file C:\\mascot\\20140703\_Tmgf\_1D\\CSV\_UseAnalysis\\MasterCSV\\All\_Glyco\\mgf\\ptm\\UC18ERLIC\_PTM\_35D.mgf

Click mouse within plot area to zoom in by factor of two about that point

Or, to Da

Label all possible matches Label matches used for scoring

Show Y-axis

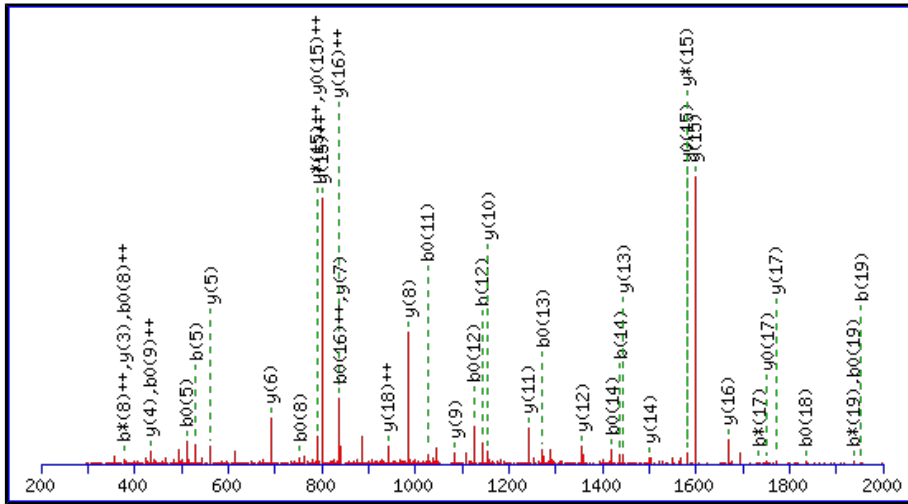

Monoisotopic mass of neutral peptide Mr(calc): 2126.9756

Fixed modifications: Carbamidomethyl (C) (apply to specified residues or termini only)

Variable modifications:

N2 : Deamidated (NQ)

Ions Score: 120 Expect: 2.1e-010

Matches : 41/224 fragment ions using 51 most intense peaks ([help](#))

| #  | b         | b <sup>++</sup> | b <sup>*</sup> | b <sup>*++</sup> | b <sup>0</sup> | b <sup>0++</sup> | Seq. | y         | y <sup>++</sup> | y <sup>*</sup> | y <sup>*++</sup> | y <sup>0</sup> | y <sup>0++</sup> | #  |
|----|-----------|-----------------|----------------|------------------|----------------|------------------|------|-----------|-----------------|----------------|------------------|----------------|------------------|----|
| 1  | 130.0499  | 65.5286         |                |                  | 112.0393       | 56.5233          | E    |           |                 |                |                  |                |                  | 20 |
| 2  | 245.0768  | 123.0420        | 228.0503       | 114.5288         | 227.0662       | 114.0368         | N    | 1998.9403 | 999.9738        | 1981.9138      | 991.4605         | 1980.9298      | 990.9685         | 19 |
| 3  | 358.1609  | 179.5841        | 341.1343       | 171.0708         | 340.1503       | 170.5788         | L    | 1883.9134 | 942.4603        | 1866.8868      | 933.9471         | 1865.9028      | 933.4550         | 18 |
| 4  | 459.2086  | 230.1079        | 442.1820       | 221.5946         | 441.1980       | 221.1026         | T    | 1770.8293 | 885.9183        | 1753.8028      | 877.4050         | 1752.8188      | 876.9130         | 17 |
| 5  | 530.2457  | 265.6265        | 513.2191       | 257.1132         | 512.2351       | 256.6212         | A    | 1669.7816 | 835.3945        | 1652.7551      | 826.8812         | 1651.7711      | 826.3892         | 16 |
| 6  | 627.2984  | 314.1529        | 610.2719       | 305.6396         | 609.2879       | 305.1476         | P    | 1598.7445 | 799.8759        | 1581.7180      | 791.3626         | 1580.7340      | 790.8706         | 15 |
| 7  | 684.3199  | 342.6636        | 667.2933       | 334.1503         | 666.3093       | 333.6583         | G    | 1501.6918 | 751.3495        | 1484.6652      | 742.8362         | 1483.6812      | 742.3442         | 14 |
| 8  | 771.3519  | 386.1796        | 754.3254       | 377.6663         | 753.3414       | 377.1743         | S    | 1444.6703 | 722.8388        | 1427.6438      | 714.3255         | 1426.6597      | 713.8335         | 13 |
| 9  | 886.3789  | 443.6931        | 869.3523       | 435.1798         | 868.3683       | 434.6878         | D    | 1357.6383 | 679.3228        | 1340.6117      | 670.8095         | 1339.6277      | 670.3175         | 12 |
| 10 | 973.4109  | 487.2091        | 956.3843       | 478.6958         | 955.4003       | 478.2038         | S    | 1242.6113 | 621.8093        | 1225.5848      | 613.2960         | 1224.6008      | 612.8040         | 11 |
| 11 | 1044.4480 | 522.7276        | 1027.4215      | 514.2144         | 1026.4374      | 513.7224         | A    | 1155.5793 | 578.2933        | 1138.5528      | 569.7800         | 1137.5687      | 569.2880         | 10 |
| 12 | 1143.5164 | 572.2619        | 1126.4899      | 563.7486         | 1125.5059      | 563.2566         | V    | 1084.5422 | 542.7747        | 1067.5156      | 534.2615         | 1066.5316      | 533.7694         | 9  |
| 13 | 1290.5848 | 645.7961        | 1273.5583      | 637.2828         | 1272.5743      | 636.7908         | F    | 985.4738  | 493.2405        | 968.4472       | 484.7273         | 967.4632       | 484.2352         | 8  |
| 14 | 1437.6533 | 719.3303        | 1420.6267      | 710.8170         | 1419.6427      | 710.3250         | F    | 838.4054  | 419.7063        | 821.3788       | 411.1930         | 820.3948       | 410.7010         | 7  |
| 15 | 1566.6958 | 783.8516        | 1549.6693      | 775.3383         | 1548.6853      | 774.8463         | E    | 691.3369  | 346.1721        | 674.3104       | 337.6588         | 673.3264       | 337.1668         | 6  |
| 16 | 1694.7544 | 847.8808        | 1677.7279      | 839.3676         | 1676.7439      | 838.8756         | Q    | 562.2944  | 281.6508        | 545.2678       | 273.1375         | 544.2838       | 272.6455         | 5  |
| 17 | 1751.7759 | 876.3916        | 1734.7493      | 867.8783         | 1733.7653      | 867.3863         | G    | 434.2358  | 217.6215        | 417.2092       | 209.1083         | 416.2252       | 208.6162         | 4  |
| 18 | 1852.8236 | 926.9154        | 1835.7970      | 918.4021         | 1834.8130      | 917.9101         | T    | 377.2143  | 189.1108        | 360.1878       | 180.5975         | 359.2037       | 180.1055         | 3  |
| 19 | 1953.8712 | 977.4393        | 1936.8447      | 968.9260         | 1935.8607      | 968.4340         | T    | 276.1666  | 138.5870        | 259.1401       | 130.0737         | 258.1561       | 129.5817         | 2  |
| 20 |           |                 |                |                  |                |                  | R    | 175.1190  | 88.0631         | 158.0924       | 79.5498          |                |                  | 1  |

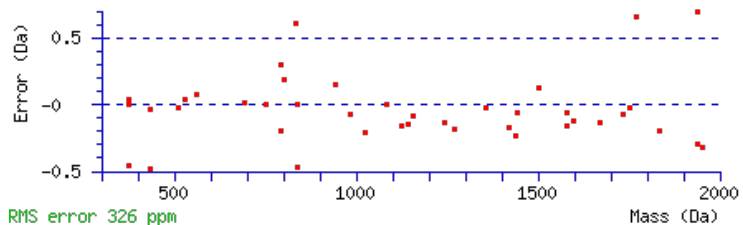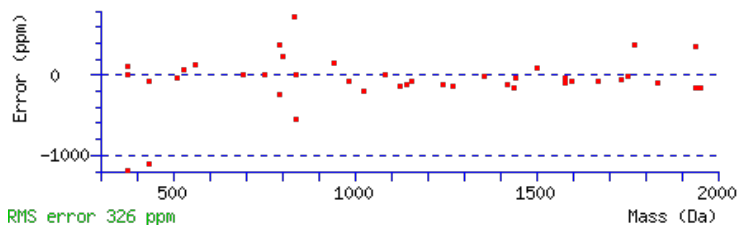

NCBI BLAST search of [ENLTAPGSDSAVFFEQGTR](#)

(Parameters: blastp, nr protein database, expect=20000, no filter, PAM30)

Other BLAST [web gateways](#)

**All matches to this query**

| Score | Mr(calc)  | Delta   | Sequence                             | Site Analysis         |
|-------|-----------|---------|--------------------------------------|-----------------------|
| 119.7 | 2126.9756 | 0.0097  | <a href="#">ENLTAPGSDSAVFFEQGTR</a>  | Deamidated N2 100.00% |
| 115.2 | 2125.9916 | 0.9937  | <a href="#">ENLTAPGSDSAVFFEQGTR</a>  |                       |
| 53.6  | 2126.9756 | 0.0097  | <a href="#">ENLTAPGSDSAVFFEQGTR</a>  | Deamidated Q16 0.00%  |
| 4.0   | 2124.9884 | 1.9969  | <a href="#">YMNDINNIKNVASTIGPNK</a>  |                       |
| 3.7   | 2126.9884 | -0.0031 | <a href="#">AMFQYLDVQEPNKWWR</a>     |                       |
| 3.1   | 2125.9777 | 1.0076  | <a href="#">NQDTQHGvangashpppler</a> |                       |
| 2.4   | 2124.9806 | 2.0047  | <a href="#">SOKMEIESVLMKQQLQA</a>    |                       |
| 1.7   | 2126.9917 | -0.0064 | <a href="#">EVQYNMGFLFAYSMRQK</a>    |                       |
| 1.1   | 2126.9902 | -0.0049 | <a href="#">GQGPELMGGAQTPTKQPEER</a> |                       |
| 0.4   | 2125.9725 | 1.0129  | <a href="#">YMNDINNIKNVASTIGPNK</a>  |                       |

Mascot: <http://www.matrixscience.com/>

# MATRIX SCIENCE Mascot Search Results

## Peptide View

MS/MS Fragmentation of **ELHHLQEQNVSNAFLDKGEFYIGSK**

Found in **E9PFZ2** in **con\_Xuniprot\_HUMAN3**, E9PFZ2\_HUMAN Ceruloplasmin OS=Homo sapiens GN=CP PE=2 SV=1

Match to Query 26413: 2903.417052 from(968.812960,3+) intensity(86215.4609) rtinseconds(1606) scans(4095) index(2714)

Title: 111019\_Est\_ISCardio\_NMI\_YP\_G\_5Spectrum3463\_scans\_\_4095

Data file C:\mascot\20140703\_Tmgf\_1D\CSV\_UseAnalysis\MasterCSV\All\_Glyco\mgf\ptm\UC18ERLIC\_PTМ\_35D.mgf

Click mouse within plot area to zoom in by factor of two about that point

Or, to Da

Label all possible matches Label matches used for scoring

Show Y-axis

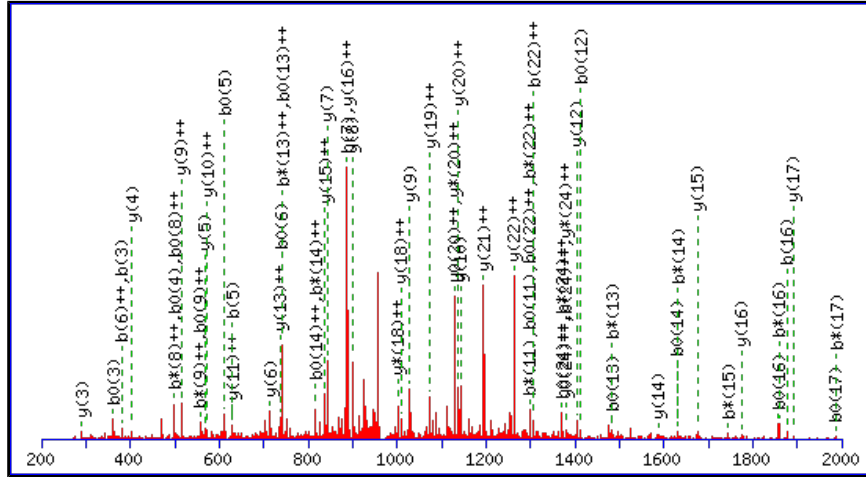

Monoisotopic mass of neutral peptide Mr(calc): 2903.4090

Fixed modifications: Carbamidomethyl (C) (apply to specified residues or termini only)

Variable modifications: N9 : Deamidated (NQ)

Ions Score: 101 Expect: 2.3e-008

Matches : 64/276 fragment ions using 72 most intense peaks ([help](#))

| #  | b                | b <sup>++</sup>  | b*               | b <sup>*++</sup> | b <sup>0</sup>   | b <sup>0++</sup> | Seq. | y                | y <sup>++</sup>  | y*        | y <sup>*++</sup> | y <sup>0</sup> | y <sup>0++</sup> | #  |
|----|------------------|------------------|------------------|------------------|------------------|------------------|------|------------------|------------------|-----------|------------------|----------------|------------------|----|
| 1  | 130.0499         | 65.5286          |                  |                  | 112.0393         | 56.5233          | E    |                  |                  |           |                  |                |                  | 25 |
| 2  | 243.1339         | 122.0706         |                  |                  | 225.1234         | 113.0653         | L    | 2775.3737        | 1388.1905        | 2758.3471 | 1379.6772        | 2757.3631      | 1379.1852        | 24 |
| 3  | <b>380.1928</b>  | 190.6001         |                  |                  | <b>362.1823</b>  | 181.5948         | H    | 2662.2896        | 1331.6484        | 2645.2631 | 1323.1352        | 2644.2790      | 1322.6432        | 23 |
| 4  | 517.2518         | 259.1295         |                  |                  | <b>499.2412</b>  | 250.1242         | H    | 2525.2307        | <b>1263.1190</b> | 2508.2041 | 1254.6057        | 2507.2201      | 1254.1137        | 22 |
| 5  | <b>630.3358</b>  | 315.6715         |                  |                  | <b>612.3253</b>  | 306.6663         | L    | 2388.1718        | <b>1194.5895</b> | 2371.1452 | 1186.0763        | 2370.1612      | 1185.5842        | 21 |
| 6  | 758.3944         | <b>379.7008</b>  | 741.3678         | 371.1876         | <b>740.3838</b>  | 370.6956         | Q    | 2275.0877        | <b>1138.0475</b> | 2258.0612 | <b>1129.5342</b> | 2257.0772      | <b>1129.0422</b> | 20 |
| 7  | <b>887.4370</b>  | 444.2221         | 870.4104         | 435.7089         | 869.4264         | 435.2169         | E    | 2147.0291        | <b>1074.0182</b> | 2130.0026 | 1065.5049        | 2129.0186      | 1065.0129        | 19 |
| 8  | 1015.4956        | 508.2514         | 998.4690         | <b>499.7381</b>  | 997.4850         | <b>499.2461</b>  | Q    | 2017.9865        | <b>1009.4969</b> | 2000.9600 | <b>1000.9836</b> | 1999.9760      | 1000.4916        | 18 |
| 9  | 1130.5225        | 565.7649         | 1113.4960        | <b>557.2516</b>  | 1112.5119        | <b>556.7596</b>  | N    | <b>1889.9280</b> | 945.4676         | 1872.9014 | 936.9543         | 1871.9174      | 936.4623         | 17 |
| 10 | 1229.5909        | 615.2991         | 1212.5644        | 606.7858         | 1211.5804        | 606.2938         | V    | <b>1774.9010</b> | <b>887.9542</b>  | 1757.8745 | 879.4409         | 1756.8905      | 878.9489         | 16 |
| 11 | 1316.6230        | 658.8151         | <b>1299.5964</b> | 650.3018         | <b>1298.6124</b> | 649.8098         | S    | <b>1675.8326</b> | <b>838.4199</b>  | 1658.8061 | 829.9067         | 1657.8220      | 829.4147         | 15 |
| 12 | 1430.6659        | 715.8366         | 1413.6393        | 707.3233         | <b>1412.6553</b> | 706.8313         | N    | <b>1588.8006</b> | 794.9039         | 1571.7740 | 786.3907         | 1570.7900      | 785.8986         | 14 |
| 13 | 1501.7030        | 751.3551         | <b>1484.6764</b> | <b>742.8419</b>  | <b>1483.6924</b> | <b>742.3499</b>  | A    | 1474.7577        | <b>737.8825</b>  | 1457.7311 | 729.3692         | 1456.7471      | 728.8772         | 13 |
| 14 | 1648.7714        | 824.8893         | <b>1631.7449</b> | <b>816.3761</b>  | <b>1630.7608</b> | <b>815.8841</b>  | F    | <b>1403.7205</b> | 702.3639         | 1386.6940 | 693.8506         | 1385.7100      | 693.3586         | 12 |
| 15 | 1761.8555        | 881.4314         | <b>1744.8289</b> | 872.9181         | 1743.8449        | 872.4261         | L    | 1256.6521        | <b>628.8297</b>  | 1239.6256 | 620.3164         | 1238.6416      | 619.8244         | 11 |
| 16 | <b>1876.8824</b> | 938.9448         | <b>1859.8559</b> | 930.4316         | <b>1858.8719</b> | 929.9396         | D    | <b>1143.5681</b> | <b>572.2877</b>  | 1126.5415 | 563.7744         | 1125.5575      | 563.2824         | 10 |
| 17 | 2004.9774        | 1002.9923        | <b>1987.9508</b> | 994.4791         | <b>1986.9668</b> | 993.9870         | K    | <b>1028.5411</b> | <b>514.7742</b>  | 1011.5146 | 506.2609         | 1010.5306      | 505.7689         | 9  |
| 18 | 2061.9988        | 1031.5031        | 2044.9723        | 1022.9898        | 2043.9883        | 1022.4978        | G    | <b>900.4462</b>  | 450.7267         | 883.4196  | 442.2134         | 882.4356       | 441.7214         | 8  |
| 19 | 2191.0414        | 1096.0244        | 2174.0149        | 1087.5111        | 2173.0309        | 1087.0191        | E    | <b>843.4247</b>  | 422.2160         | 826.3981  | 413.7027         | 825.4141       | 413.2107         | 7  |
| 20 | 2338.1099        | 1169.5586        | 2321.0833        | 1161.0453        | 2320.0993        | 1160.5533        | F    | <b>714.3821</b>  | 357.6947         | 697.3556  | 349.1814         | 696.3715       | 348.6894         | 6  |
| 21 | 2501.1732        | 1251.0902        | 2484.1466        | 1242.5770        | 2483.1626        | 1242.0849        | Y    | <b>567.3137</b>  | 284.1605         | 550.2871  | 275.6472         | 549.3031       | 275.1552         | 5  |
| 22 | 2614.2572        | <b>1307.6323</b> | 2597.2307        | <b>1299.1190</b> | 2596.2467        | <b>1298.6270</b> | I    | <b>404.2504</b>  | 202.6288         | 387.2238  | 194.1155         | 386.2398       | 193.6235         | 4  |
| 23 | 2671.2787        | 1336.1430        | 2654.2522        | 1327.6297        | 2653.2681        | 1327.1377        | G    | <b>291.1663</b>  | 146.0868         | 274.1397  | 137.5735         | 273.1557       | 137.0815         | 3  |

|    |           |           |           |           |           |           |   |          |          |          |          |          |          |   |
|----|-----------|-----------|-----------|-----------|-----------|-----------|---|----------|----------|----------|----------|----------|----------|---|
| 24 | 2758.3107 | 1379.6590 | 2741.2842 | 1371.1457 | 2740.3002 | 1370.6537 | S | 234.1448 | 117.5761 | 217.1183 | 109.0628 | 216.1343 | 108.5708 | 2 |
| 25 |           |           |           |           |           |           | K | 147.1128 | 74.0600  | 130.0863 | 65.5468  |          |          | 1 |

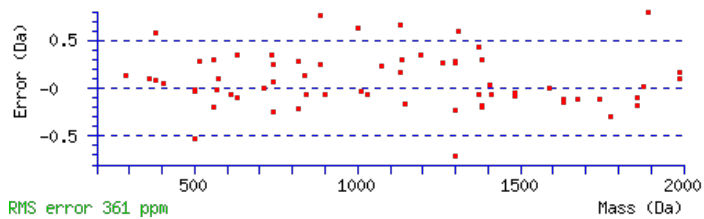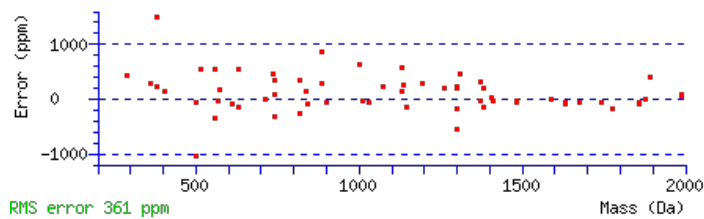

NCBI BLAST search of [ELHHLQEQNVSN AFLDKGEFYIGSK](#)  
 (Parameters: blastp, nr protein database, expect=20000, no filter, PAM30)  
 Other BLAST [web gateways](#)

All matches to this query

| Score | Mr(calc)  | Delta   | Sequence                                     | Site Analysis        |
|-------|-----------|---------|----------------------------------------------|----------------------|
| 100.9 | 2903.4090 | 0.0081  | <a href="#">ELHHLQEQNVSN AFLDKGEFYIGSK</a>   | Deamidated N9 78.98% |
| 91.5  | 2903.4090 | 0.0081  | <a href="#">ELHHLQEQNVSN AFLDKGEFYIGSK</a>   | Deamidated Q8 9.13%  |
| 90.1  | 2903.4090 | 0.0081  | <a href="#">ELHHLQEQNVSN AFLDKGEFYIGSK</a>   | Deamidated Q6 6.69%  |
| 89.0  | 2903.4090 | 0.0081  | <a href="#">ELHHLQEQNVSN AFLDKGEFYIGSK</a>   | Deamidated N12 5.19% |
| 72.4  | 2902.4249 | 0.9921  | <a href="#">ELHHLQEQNVSN AFLDKGEFYIGSK</a>   |                      |
| 6.6   | 2903.4117 | 0.0054  | <a href="#">QLQQQNEKEMMEQIRQQT DILEK</a>     |                      |
| 5.9   | 2903.4247 | -0.0076 | <a href="#">LNSISDEENLTTIENRLISNEOQLK</a>    |                      |
| 5.7   | 2901.4001 | 2.0170  | <a href="#">DKAPGMQTLPSHRLMSAFSEV NKPSGV</a> |                      |
| 5.4   | 2903.4247 | -0.0076 | <a href="#">LNSISDEENLTTIENRLISNEOQLK</a>    |                      |
| 5.2   | 2903.4182 | -0.0012 | <a href="#">AOAEDLSQDTITMIQQLIDGIDQKGR</a>   |                      |

Mascot: <http://www.matrixscience.com/>

# MATRIX SCIENCE Mascot Search Results

## Peptide View

MS/MS Fragmentation of **AGLQAFFQVQECNK**

Found in **E9PFZ2** in **con\_Xuniprot\_HUMAN3**, E9PFZ2\_HUMAN Ceruloplasmin OS=Homo sapiens GN=CP PE=2 SV=1

Match to Query 7850: 1639.769268 from(820.891910,2+) intensity(445989.5625) rtinseconds(2030) scans(5160) index(5466)

Title: 111019\_Est\_ISCardio\_NMI\_YP\_G\_8Spectrum4537\_scans\_\_5160

Data file C:\\mascot\\20140703\_Tmgf\_1D\\CSV\_UseAnalysis\\MasterCSV\\All\_Glyco\\mgf\\ptm\\UC18ERLIC\_PTM\_35D.mgf

Click mouse within plot area to zoom in by factor of two about that point

Or, to Da

Label all possible matches Label matches used for scoring

Show Y-axis

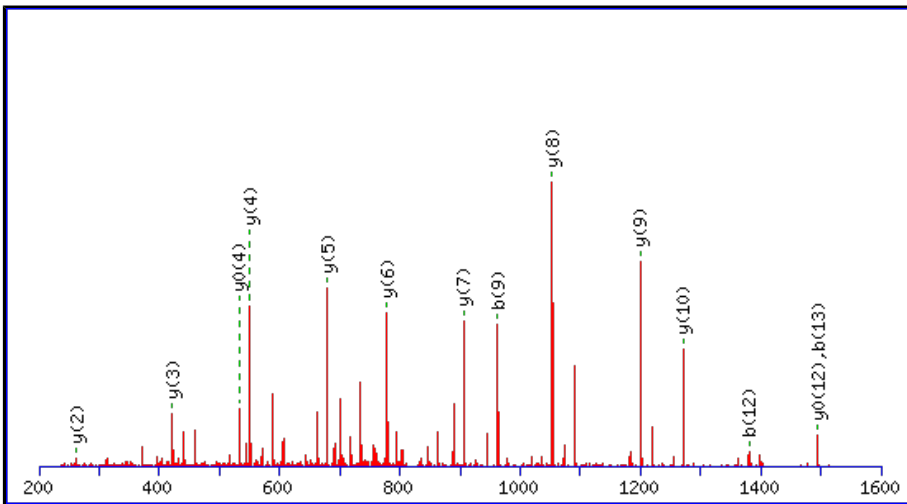

Monoisotopic mass of neutral peptide Mr(calc): 1639.7664

Fixed modifications: Carbamidomethyl (C) (apply to specified residues or termini only)

Variable modifications:

N13 : Deamidated (NQ)

Ions Score: 94 Expect: 7.2e-008

Matches : 14/124 fragment ions using 13 most intense peaks ([help](#))

| #  | b         | b <sup>++</sup> | b <sup>*</sup> | b <sup>*++</sup> | b <sup>0</sup> | b <sup>0++</sup> | Seq. | y         | y <sup>++</sup> | y <sup>*</sup> | y <sup>*++</sup> | y <sup>0</sup> | y <sup>0++</sup> | #  |
|----|-----------|-----------------|----------------|------------------|----------------|------------------|------|-----------|-----------------|----------------|------------------|----------------|------------------|----|
| 1  | 72.0444   | 36.5258         |                |                  |                |                  | A    |           |                 |                |                  |                |                  | 14 |
| 2  | 129.0659  | 65.0366         |                |                  |                |                  | G    | 1569.7366 | 785.3719        | 1552.7101      | 776.8587         | 1551.7260      | 776.3667         | 13 |
| 3  | 242.1499  | 121.5786        |                |                  |                |                  | L    | 1512.7151 | 756.8612        | 1495.6886      | 748.3479         | 1494.7046      | 747.8559         | 12 |
| 4  | 370.2085  | 185.6079        | 353.1819       | 177.0946         |                |                  | Q    | 1399.6311 | 700.3192        | 1382.6045      | 691.8059         | 1381.6205      | 691.3139         | 11 |
| 5  | 441.2456  | 221.1264        | 424.2191       | 212.6132         |                |                  | A    | 1271.5725 | 636.2899        | 1254.5460      | 627.7766         | 1253.5619      | 627.2846         | 10 |
| 6  | 588.3140  | 294.6607        | 571.2875       | 286.1474         |                |                  | F    | 1200.5354 | 600.7713        | 1183.5088      | 592.2581         | 1182.5248      | 591.7660         | 9  |
| 7  | 735.3824  | 368.1949        | 718.3559       | 359.6816         |                |                  | F    | 1053.4670 | 527.2371        | 1036.4404      | 518.7239         | 1035.4564      | 518.2318         | 8  |
| 8  | 863.4410  | 432.2241        | 846.4145       | 423.7109         |                |                  | Q    | 906.3986  | 453.7029        | 889.3720       | 445.1896         | 888.3880       | 444.6976         | 7  |
| 9  | 962.5094  | 481.7584        | 945.4829       | 473.2451         |                |                  | V    | 778.3400  | 389.6736        | 761.3134       | 381.1604         | 760.3294       | 380.6683         | 6  |
| 10 | 1090.5680 | 545.7876        | 1073.5415      | 537.2744         |                |                  | Q    | 679.2716  | 340.1394        | 662.2450       | 331.6261         | 661.2610       | 331.1341         | 5  |
| 11 | 1219.6106 | 610.3089        | 1202.5841      | 601.7957         | 1201.6000      | 601.3037         | E    | 551.2130  | 276.1101        | 534.1864       | 267.5969         | 533.2024       | 267.1049         | 4  |
| 12 | 1379.6413 | 690.3243        | 1362.6147      | 681.8110         | 1361.6307      | 681.3190         | C    | 422.1704  | 211.5888        | 405.1438       | 203.0756         |                |                  | 3  |
| 13 | 1494.6682 | 747.8377        | 1477.6416      | 739.3245         | 1476.6576      | 738.8325         | N    | 262.1397  | 131.5735        | 245.1132       | 123.0602         |                |                  | 2  |
| 14 |           |                 |                |                  |                |                  | K    | 147.1128  | 74.0600         | 130.0863       | 65.5468          |                |                  | 1  |

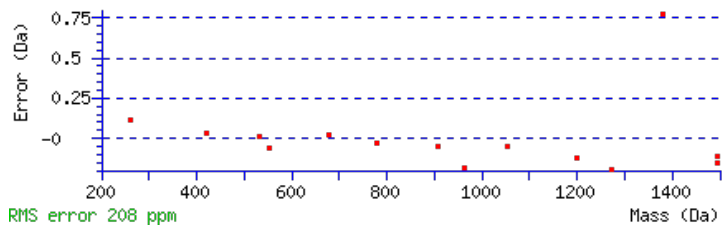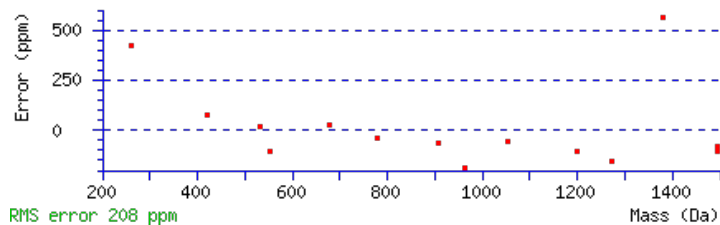

NCBI BLAST search of [AGLQAFFQVQECNK](#)

(Parameters: blastp, nr protein database, expect=20000, no filter, PAM30)

Other BLAST [web gateways](#)

**All matches to this query**

| Score | Mr(calc)  | Delta   | Sequence                        | Site Analysis         |
|-------|-----------|---------|---------------------------------|-----------------------|
| 93.9  | 1639.7664 | 0.0028  | <a href="#">AGLQAFFQVQECNK</a>  | Deamidated N13 99.96% |
| 60.1  | 1639.7664 | 0.0028  | <a href="#">AGLQAFFQVQECNK</a>  | Deamidated Q10 0.04%  |
| 43.6  | 1639.7664 | 0.0028  | <a href="#">AGLQAFFQVQECNK</a>  | Deamidated Q8 0.00%   |
| 15.6  | 1639.7664 | 0.0028  | <a href="#">AGLQAFFQVQECNK</a>  | Deamidated Q4 0.00%   |
| 5.4   | 1639.7732 | -0.0039 | <a href="#">KLIQMSMQQVCDK</a>   |                       |
| 4.9   | 1639.7664 | 0.0029  | <a href="#">ANSEMWNKGASIADK</a> |                       |
| 3.6   | 1639.7736 | -0.0044 | <a href="#">QPPEQQAPSKQCSR</a>  |                       |
| 3.3   | 1637.7607 | 2.0086  | <a href="#">NTSALVIVHDTTGMV</a> |                       |
| 2.9   | 1639.7763 | -0.0070 | <a href="#">MASVQQGEKQLFEK</a>  |                       |
| 2.5   | 1639.7763 | -0.0070 | <a href="#">MASVQQGEKQLFEK</a>  |                       |

Mascot: <http://www.matrixscience.com/>



# MATRIX SCIENCE Mascot Search Results

## Peptide View

MS/MS Fragmentation of **ELHHLQEQNVSN AFLDK**

Found in **E9PFZ2** in **con\_Xuniprot\_HUMAN3**, E9PFZ2\_HUMAN Ceruloplasmin OS=Homo sapiens GN=CP PE=2 SV=1

Match to Query 12735: 2021.989048 from(1012.001800,2+) intensity(25765.3047) rtinseconds(972) scans(2335) index(18391)

Title: 111019\_Est\_MI\_YP\_G\_08Spectrum2041\_scans\_\_2335

Data file C:\\mascot\\20140703\_Tmgf\_1D\\CSV\_UseAnalysis\\MasterCSV\\All\_Glyco\\mgf\\ptm\\UC18ERLIC\_PTM\_35D.mgf

Click mouse within plot area to zoom in by factor of two about that point

Or, to Da

Label all possible matches Label matches used for scoring

Show Y-axis

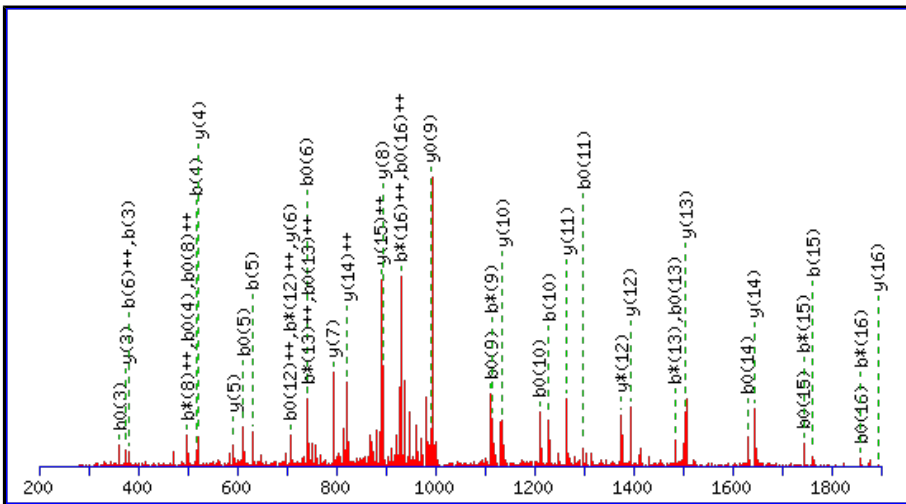

Monoisotopic mass of neutral peptide Mr(calc): 2021.9806

Fixed modifications: Carbamidomethyl (C) (apply to specified residues or termini only)

Variable modifications:

N9 : Deamidated (NQ)

Ions Score: 93 Expect: 1.4e-007

Matches : 45/180 fragment ions using 49 most intense peaks ([help](#))

| #  | b         | b <sup>++</sup> | b <sup>*</sup> | b <sup>*++</sup> | b <sup>0</sup> | b <sup>0++</sup> | Seq. | y         | y <sup>++</sup> | y <sup>*</sup> | y <sup>*++</sup> | y <sup>0</sup> | y <sup>0++</sup> | #  |
|----|-----------|-----------------|----------------|------------------|----------------|------------------|------|-----------|-----------------|----------------|------------------|----------------|------------------|----|
| 1  | 130.0499  | 65.5286         |                |                  | 112.0393       | 56.5233          | E    |           |                 |                |                  |                |                  | 17 |
| 2  | 243.1339  | 122.0706        |                |                  | 225.1234       | 113.0653         | L    | 1893.9454 | 947.4763        | 1876.9188      | 938.9630         | 1875.9348      | 938.4710         | 16 |
| 3  | 380.1928  | 190.6001        |                |                  | 362.1823       | 181.5948         | H    | 1780.8613 | 890.9343        | 1763.8347      | 882.4210         | 1762.8507      | 881.9290         | 15 |
| 4  | 517.2518  | 259.1295        |                |                  | 499.2412       | 250.1242         | H    | 1643.8024 | 822.4048        | 1626.7758      | 813.8916         | 1625.7918      | 813.3995         | 14 |
| 5  | 630.3358  | 315.6715        |                |                  | 612.3253       | 306.6663         | L    | 1506.7435 | 753.8754        | 1489.7169      | 745.3621         | 1488.7329      | 744.8701         | 13 |
| 6  | 758.3944  | 379.7008        | 741.3678       | 371.1876         | 740.3838       | 370.6956         | Q    | 1393.6594 | 697.3333        | 1376.6329      | 688.8201         | 1375.6488      | 688.3281         | 12 |
| 7  | 887.4370  | 444.2221        | 870.4104       | 435.7089         | 869.4264       | 435.2169         | E    | 1265.6008 | 633.3040        | 1248.5743      | 624.7908         | 1247.5903      | 624.2988         | 11 |
| 8  | 1015.4956 | 508.2514        | 998.4690       | 499.7381         | 997.4850       | 499.2461         | Q    | 1136.5582 | 568.7828        | 1119.5317      | 560.2695         | 1118.5477      | 559.7775         | 10 |
| 9  | 1130.5225 | 565.7649        | 1113.4960      | 557.2516         | 1112.5119      | 556.7596         | N    | 1008.4997 | 504.7535        | 991.4731       | 496.2402         | 990.4891       | 495.7482         | 9  |
| 10 | 1229.5909 | 615.2991        | 1212.5644      | 606.7858         | 1211.5804      | 606.2938         | V    | 893.4727  | 447.2400        | 876.4462       | 438.7267         | 875.4621       | 438.2347         | 8  |
| 11 | 1316.6230 | 658.8151        | 1299.5964      | 650.3018         | 1298.6124      | 649.8098         | S    | 794.4043  | 397.7058        | 777.3777       | 389.1925         | 776.3937       | 388.7005         | 7  |
| 12 | 1430.6659 | 715.8366        | 1413.6393      | 707.3233         | 1412.6553      | 706.8313         | N    | 707.3723  | 354.1898        | 690.3457       | 345.6765         | 689.3617       | 345.1845         | 6  |
| 13 | 1501.7030 | 751.3551        | 1484.6764      | 742.8419         | 1483.6924      | 742.3499         | A    | 593.3293  | 297.1683        | 576.3028       | 288.6550         | 575.3188       | 288.1630         | 5  |
| 14 | 1648.7714 | 824.8893        | 1631.7449      | 816.3761         | 1630.7608      | 815.8841         | F    | 522.2922  | 261.6498        | 505.2657       | 253.1365         | 504.2817       | 252.6445         | 4  |
| 15 | 1761.8555 | 881.4314        | 1744.8289      | 872.9181         | 1743.8449      | 872.4261         | L    | 375.2238  | 188.1155        | 358.1973       | 179.6023         | 357.2132       | 179.1103         | 3  |
| 16 | 1876.8824 | 938.9448        | 1859.8559      | 930.4316         | 1858.8719      | 929.9396         | D    | 262.1397  | 131.5735        | 245.1132       | 123.0602         | 244.1292       | 122.5682         | 2  |
| 17 |           |                 |                |                  |                |                  | K    | 147.1128  | 74.0600         | 130.0863       | 65.5468          |                |                  | 1  |

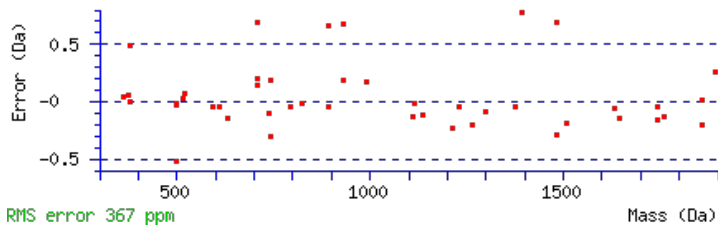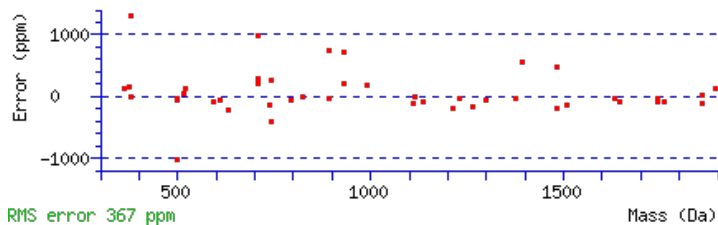

NCBI BLAST search of [ELHHLQEQNVSN AFLDK](#)

(Parameters: blastp, nr protein database, expect=20000, no filter, PAM30)

Other BLAST [web gateways](#)

**All matches to this query**

| Score | Mr(calc)  | Delta   | Sequence                           | Site Analysis        |
|-------|-----------|---------|------------------------------------|----------------------|
| 92.8  | 2021.9806 | 0.0084  | <a href="#">ELHHLQEQNVSN AFLDK</a> | Deamidated N9 49.30% |
| 92.8  | 2021.9806 | 0.0084  | <a href="#">ELHHLQEQNVSN AFLDK</a> | Deamidated Q8 49.30% |
| 77.3  | 2021.9806 | 0.0084  | <a href="#">ELHHLQEQNVSN AFLDK</a> | Deamidated Q6 1.39%  |
| 53.0  | 2021.9806 | 0.0084  | <a href="#">ELHHLQEQNVSN AFLDK</a> | Deamidated N12 0.01% |
| 11.1  | 2021.9905 | -0.0015 | <a href="#">QQEQLQLQLLQQQHAGK</a>  |                      |
| 10.9  | 2021.9905 | -0.0015 | <a href="#">QQEQLQLQLLQQQHAGK</a>  |                      |
| 9.7   | 2021.9841 | 0.0050  | <a href="#">LQDVVHMQGGSPLOASPK</a> |                      |
| 7.5   | 2021.9905 | -0.0015 | <a href="#">QQEQLQLQLLQQQHAGK</a>  |                      |
| 6.4   | 2021.9905 | -0.0015 | <a href="#">QQEQLQLQLLQQQHAGK</a>  |                      |
| 5.2   | 2021.9959 | -0.0068 | <a href="#">EYSLHSFDRKWGQIQK</a>   |                      |

Mascot: <http://www.matrixscience.com/>

# MASCOT SCIENCE Mascot Search Results

## Peptide View

MS/MS Fragmentation of **ENLTAPGSDSAVFFEQGTTR**

Found in **E9PFZ2** in **con\_Xuniprot\_HUMAN3**, E9PFZ2\_HUMAN Ceruloplasmin OS=Homo sapiens GN=CP PE=2 SV=1

Match to Query 14356: 2127.967828 from(1064.991190,2+) intensity(84965.3203) rtinseconds(1490) scans(3832) index(6428)

Title: 111019\_Est\_ISCardio\_NMI\_YP\_G\_9Spectrum3372\_scans\_\_3832

Data file C:\\mascot\\20140703\_Tmgf\_1D\\CSV\_UseAnalysis\\MasterCSV\\All\_Glyco\\mgf\\ptm\\UC18ERLIC\_PTM\_35D.mgf

Click mouse within plot area to zoom in by factor of two about that point

Or, to Da

Label all possible matches Label matches used for scoring

Show Y-axis

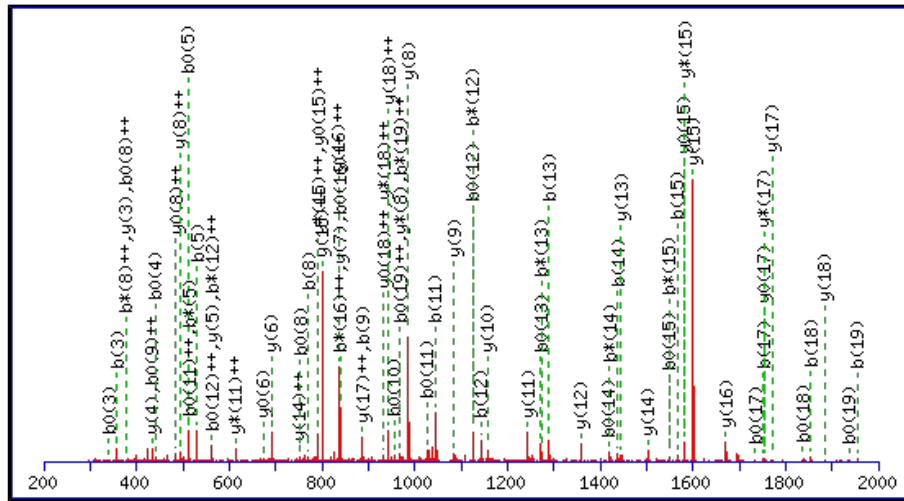

Monoisotopic mass of neutral peptide  $M_r(\text{calc})$ : 2127.9597

Fixed modifications: Carbamidomethyl (C) (apply to specified residues or termini only)

Variable modifications:

N2 : Deamidated (NQ)

Q16 : Deamidated (NQ)

Ions Score: 88 Expect: 2.5e-007

Matches : 74/224 fragment ions using 135 most intense peaks ([help](#))

| #  | b                | b <sup>++</sup> | b <sup>*</sup>   | b <sup>*++</sup> | b <sup>0</sup>   | b <sup>0++</sup> | Seq. | y                | y <sup>++</sup> | y <sup>*</sup>   | y <sup>*++</sup> | y <sup>0</sup>   | y <sup>0++</sup> | #  |
|----|------------------|-----------------|------------------|------------------|------------------|------------------|------|------------------|-----------------|------------------|------------------|------------------|------------------|----|
| 1  | 130.0499         | 65.5286         |                  |                  | 112.0393         | 56.5233          | E    |                  |                 |                  |                  |                  |                  | 20 |
| 2  | 245.0768         | 123.0420        | 228.0503         | 114.5288         | 227.0662         | 114.0368         | N    | 1999.9243        | 1000.4658       | 1982.8978        | 991.9525         | 1981.9138        | 991.4605         | 19 |
| 3  | <b>358.1609</b>  | 179.5841        | 341.1343         | 171.0708         | <b>340.1503</b>  | 170.5788         | L    | <b>1884.8974</b> | <b>942.9523</b> | 1867.8709        | <b>934.4391</b>  | 1866.8868        | <b>933.9471</b>  | 18 |
| 4  | 459.2086         | 230.1079        | 442.1820         | 221.5946         | <b>441.1980</b>  | 221.1026         | T    | <b>1771.8133</b> | <b>886.4103</b> | <b>1754.7868</b> | 877.8970         | <b>1753.8028</b> | 877.4050         | 17 |
| 5  | <b>530.2457</b>  | 265.6265        | <b>513.2191</b>  | 257.1132         | <b>512.2351</b>  | 256.6212         | A    | <b>1670.7657</b> | <b>835.8865</b> | 1653.7391        | 827.3732         | 1652.7551        | 826.8812         | 16 |
| 6  | 627.2984         | 314.1529        | 610.2719         | 305.6396         | 609.2879         | 305.1476         | P    | <b>1599.7285</b> | <b>800.3679</b> | <b>1582.7020</b> | <b>791.8546</b>  | <b>1581.7180</b> | <b>791.3626</b>  | 15 |
| 7  | 684.3199         | 342.6636        | 667.2933         | 334.1503         | 666.3093         | 333.6583         | G    | <b>1502.6758</b> | <b>751.8415</b> | 1485.6492        | 743.3283         | 1484.6652        | 742.8362         | 14 |
| 8  | <b>771.3519</b>  | 386.1796        | 754.3254         | <b>377.6663</b>  | <b>753.3414</b>  | <b>377.1743</b>  | S    | <b>1445.6543</b> | 723.3308        | 1428.6278        | 714.8175         | 1427.6438        | 714.3255         | 13 |
| 9  | <b>886.3789</b>  | 443.6931        | 869.3523         | 435.1798         | 868.3683         | <b>434.6878</b>  | D    | <b>1358.6223</b> | 679.8148        | 1341.5957        | 671.3015         | 1340.6117        | 670.8095         | 12 |
| 10 | 973.4109         | 487.2091        | 956.3843         | 478.6958         | <b>955.4003</b>  | 478.2038         | S    | <b>1243.5953</b> | 622.3013        | 1226.5688        | <b>613.7880</b>  | 1225.5848        | 613.2960         | 11 |
| 11 | <b>1044.4480</b> | 522.7276        | 1027.4215        | 514.2144         | <b>1026.4374</b> | <b>513.7224</b>  | A    | <b>1156.5633</b> | 578.7853        | 1139.5368        | 570.2720         | 1138.5528        | 569.7800         | 10 |
| 12 | <b>1143.5164</b> | 572.2619        | <b>1126.4899</b> | <b>563.7486</b>  | <b>1125.5059</b> | <b>563.2566</b>  | V    | <b>1085.5262</b> | 543.2667        | 1068.4997        | 534.7535         | 1067.5156        | 534.2615         | 9  |
| 13 | <b>1290.5848</b> | 645.7961        | <b>1273.5583</b> | 637.2828         | <b>1272.5743</b> | 636.7908         | F    | <b>986.4578</b>  | <b>493.7325</b> | <b>969.4312</b>  | 485.2193         | 968.4472         | <b>484.7273</b>  | 8  |
| 14 | <b>1437.6533</b> | 719.3303        | <b>1420.6267</b> | 710.8170         | <b>1419.6427</b> | 710.3250         | F    | <b>839.3894</b>  | 420.1983        | 822.3628         | 411.6851         | 821.3788         | 411.1930         | 7  |
| 15 | <b>1566.6958</b> | 783.8516        | <b>1549.6693</b> | 775.3383         | <b>1548.6853</b> | 774.8463         | E    | <b>692.3210</b>  | 346.6641        | 675.2944         | 338.1508         | <b>674.3104</b>  | 337.6588         | 6  |
| 16 | 1695.7384        | 848.3729        | 1678.7119        | <b>839.8596</b>  | 1677.7279        | <b>839.3676</b>  | Q    | <b>563.2784</b>  | 282.1428        | 546.2518         | 273.6295         | 545.2678         | 273.1375         | 5  |
| 17 | <b>1752.7599</b> | 876.8836        | 1735.7334        | 868.3703         | <b>1734.7493</b> | 867.8783         | G    | <b>434.2358</b>  | 217.6215        | 417.2092         | 209.1083         | 416.2252         | 208.6162         | 4  |
| 18 | <b>1853.8076</b> | 927.4074        | 1836.7810        | 918.8942         | <b>1835.7970</b> | 918.4021         | T    | <b>377.2143</b>  | 189.1108        | 360.1878         | 180.5975         | 359.2037         | 180.1055         | 3  |
| 19 | <b>1954.8553</b> | 977.9313        | 1937.8287        | <b>969.4180</b>  | <b>1936.8447</b> | <b>968.9260</b>  | T    | 276.1666         | 138.5870        | 259.1401         | 130.0737         | 258.1561         | 129.5817         | 2  |
| 20 |                  |                 |                  |                  |                  |                  | R    | 175.1190         | 88.0631         | 158.0924         | 79.5498          |                  |                  | 1  |

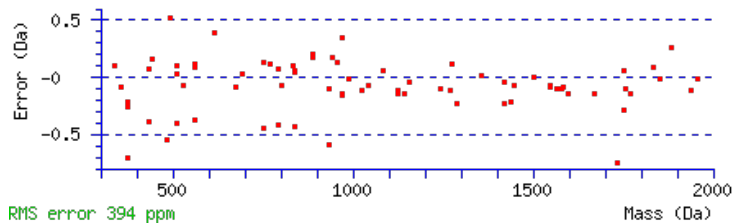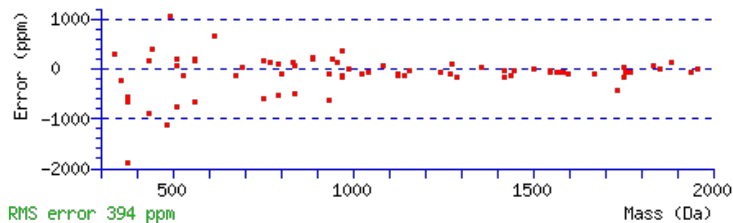

NCBI BLAST search of [ENLTAPGSDSAVFEEQGTR](#)  
 (Parameters: blastp, nr protein database, expect=20000, no filter, PAM30)

Other BLAST [web gateways](#)

**All matches to this query**

| Score | Mr(calc)  | Delta   | Sequence                            |
|-------|-----------|---------|-------------------------------------|
| 88.1  | 2127.9597 | 0.0082  | <a href="#">ENLTAPGSDSAVFEEQGTR</a> |
| 6.9   | 2127.9756 | -0.0078 | <a href="#">REDQGPPCPSVGGGDPLHR</a> |
| 1.8   | 2127.9652 | 0.0026  | <a href="#">AGMQFTMLYRDMHQINR</a>   |
| 0.5   | 2127.9652 | 0.0026  | <a href="#">AGMQFTMLYRDMHQINR</a>   |

Mascot: <http://www.matrixscience.com/>

# MASCOT SCIENCE Mascot Search Results

## Peptide View

MS/MS Fragmentation of **EHEGAIYPDNTTDFQR**

Found in **E9PFZ2** in **con\_Xuniprot\_HUMAN3**, E9PFZ2\_HUMAN Ceruloplasmin OS=Homo sapiens GN=CP PE=2 SV=1

Match to Query 11269: 1893.811308 from(947.912930,2+) intensity(113209.7891) rtinseconds(789) scans(1878) index(4266)

Title: 111019\_Est\_ISCardio\_NMI\_YP\_G\_7Spectrum1635\_scans\_\_1878

Data file C:\\mascot\\20140703\_Tmgf\_1D\\CSV\_UseAnalysis\\MasterCSV\\All\_Glyco\\mgf\\ptm\\UC18ERLIC\_PTM\_35D.mgf

Click mouse within plot area to zoom in by factor of two about that point

Or, to Da

Label all possible matches Label matches used for scoring

Show Y-axis

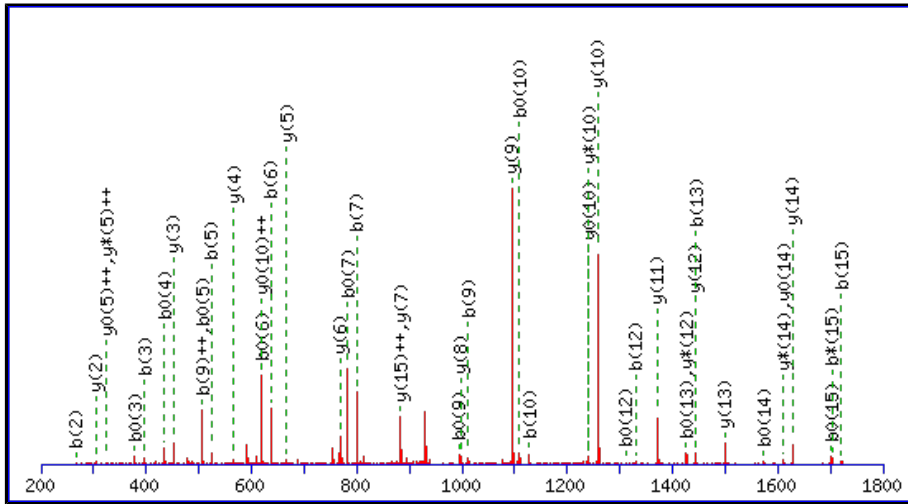

Monoisotopic mass of neutral peptide Mr(calc): 1893.8017

Fixed modifications: Carbamidomethyl (C) (apply to specified residues or termini only)

Variable modifications:

N10 : Deamidated (NQ)

Q15 : Deamidated (NQ)

Ions Score: 82 Expect: 4.5e-007

Matches : 45/156 fragment ions using 75 most intense peaks ([help](#))

| #  | b                | b <sup>++</sup> | b <sup>*</sup>   | b <sup>*++</sup> | b <sup>0</sup>   | b <sup>0++</sup> | Seq. | y                | y <sup>++</sup> | y <sup>*</sup>   | y <sup>*++</sup> | y <sup>0</sup>   | y <sup>0++</sup> | #  |
|----|------------------|-----------------|------------------|------------------|------------------|------------------|------|------------------|-----------------|------------------|------------------|------------------|------------------|----|
| 1  | 130.0499         | 65.5286         |                  |                  | 112.0393         | 56.5233          | E    |                  |                 |                  |                  |                  |                  | 16 |
| 2  | <b>267.1088</b>  | 134.0580        |                  |                  | 249.0982         | 125.0527         | H    | 1765.7664        | <b>883.3868</b> | 1748.7398        | 874.8736         | 1747.7558        | 874.3815         | 15 |
| 3  | <b>396.1514</b>  | 198.5793        |                  |                  | <b>378.1408</b>  | 189.5740         | E    | <b>1628.7075</b> | 814.8574        | <b>1611.6809</b> | 806.3441         | <b>1610.6969</b> | 805.8521         | 14 |
| 4  | 453.1728         | 227.0901        |                  |                  | <b>435.1623</b>  | 218.0848         | G    | <b>1499.6649</b> | 750.3361        | 1482.6383        | 741.8228         | 1481.6543        | 741.3308         | 13 |
| 5  | <b>524.2100</b>  | 262.6086        |                  |                  | <b>506.1994</b>  | 253.6033         | A    | <b>1442.6434</b> | 721.8253        | <b>1425.6169</b> | 713.3121         | 1424.6329        | 712.8201         | 12 |
| 6  | <b>637.2940</b>  | 319.1506        |                  |                  | <b>619.2835</b>  | 310.1454         | I    | <b>1371.6063</b> | 686.3068        | 1354.5798        | 677.7935         | 1353.5957        | 677.3015         | 11 |
| 7  | <b>800.3573</b>  | 400.6823        |                  |                  | <b>782.3468</b>  | 391.6770         | Y    | <b>1258.5222</b> | 629.7648        | <b>1241.4957</b> | 621.2515         | <b>1240.5117</b> | <b>620.7595</b>  | 10 |
| 8  | 897.4101         | 449.2087        |                  |                  | 879.3995         | 440.2034         | P    | <b>1095.4589</b> | 548.2331        | 1078.4324        | 539.7198         | 1077.4483        | 539.2278         | 9  |
| 9  | <b>1012.4371</b> | <b>506.7222</b> |                  |                  | <b>994.4265</b>  | 497.7169         | D    | <b>998.4061</b>  | 499.7067        | 981.3796         | 491.1934         | 980.3956         | 490.7014         | 8  |
| 10 | <b>1127.4640</b> | 564.2356        | 1110.4374        | 555.7224         | <b>1109.4534</b> | 555.2304         | N    | <b>883.3792</b>  | 442.1932        | 866.3527         | 433.6800         | 865.3686         | 433.1880         | 7  |
| 11 | 1228.5117        | 614.7595        | 1211.4851        | 606.2462         | 1210.5011        | 605.7542         | T    | <b>768.3523</b>  | 384.6798        | 751.3257         | 376.1665         | 750.3417         | 375.6745         | 6  |
| 12 | <b>1329.5594</b> | 665.2833        | 1312.5328        | 656.7700         | <b>1311.5488</b> | 656.2780         | T    | <b>667.3046</b>  | 334.1559        | 650.2780         | <b>325.6427</b>  | 649.2940         | <b>325.1506</b>  | 5  |
| 13 | <b>1444.5863</b> | 722.7968        | 1427.5597        | 714.2835         | <b>1426.5757</b> | 713.7915         | D    | <b>566.2569</b>  | 283.6321        | 549.2304         | 275.1188         | 548.2463         | 274.6268         | 4  |
| 14 | 1591.6547        | 796.3310        | 1574.6282        | 787.8177         | <b>1573.6441</b> | 787.3257         | F    | <b>451.2300</b>  | 226.1186        | 434.2034         | 217.6053         |                  |                  | 3  |
| 15 | <b>1720.6973</b> | 860.8523        | <b>1703.6708</b> | 852.3390         | <b>1702.6867</b> | 851.8470         | Q    | <b>304.1615</b>  | 152.5844        | 287.1350         | 144.0711         |                  |                  | 2  |
| 16 |                  |                 |                  |                  |                  |                  | R    | 175.1190         | 88.0631         | 158.0924         | 79.5498          |                  |                  | 1  |

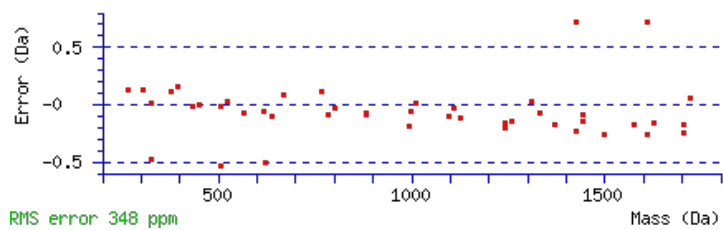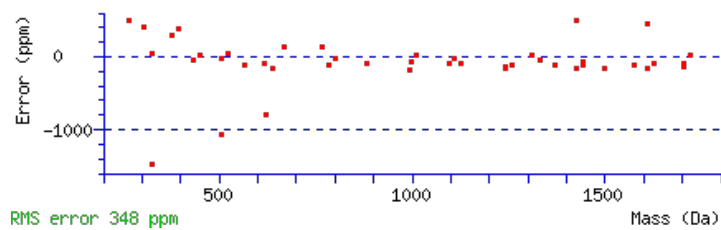

NCBI **BLAST** search of [EHEGAIYPDNTTDFQR](#)

(Parameters: blastp, nr protein database, expect=20000, no filter, PAM30)

Other BLAST [web gateways](#)

**All matches to this query**

| Score | Mr(calc)  | Delta   | Sequence                         |
|-------|-----------|---------|----------------------------------|
| 81.6  | 1893.8017 | 0.0096  | <a href="#">EHEGAIYPDNTTDFQR</a> |
| 7.5   | 1892.8107 | 1.0007  | <a href="#">CYKAEMQALFNDMEK</a>  |
| 1.4   | 1893.8122 | -0.0009 | <a href="#">ELARERENMDTDDER</a>  |

Mascot: <http://www.matrixscience.com/>

# MATRIX SCIENCE Mascot Search Results

## Peptide View

MS/MS Fragmentation of **EHEGAIYPDNTTDFQR**

Found in **E9PFZ2** in **con\_Xuniprot\_HUMAN3**, E9PFZ2\_HUMAN Ceruloplasmin OS=Homo sapiens GN=CP PE=2 SV=1

Match to Query 11203: 1892.826368 from(947.420460,2+) intensity(7358.4902) rtinseconds(771) scans(1727) index(3676)

Title: 111019\_Est\_ISCardio\_NMI\_YP\_G\_6Spectrum1452\_scans\_\_1727

Data file C:\\mascot\\20140703\_Tmgf\_1D\\CSV\_UseAnalysis\\MasterCSV\\All\_Glyco\\mgf\\ptm\\UC18ERLIC\_PTM\_35D.mgf

Click mouse within plot area to zoom in by factor of two about that point

Or, to Da

Label all possible matches Label matches used for scoring

Show Y-axis

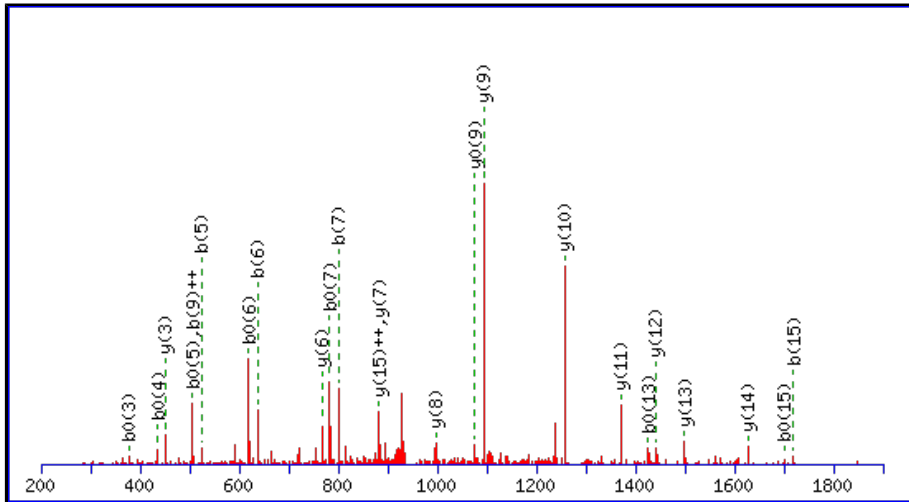

Monoisotopic mass of neutral peptide Mr(calc): 1892.8177

Fixed modifications: Carbamidomethyl (C) (apply to specified residues or termini only)

Variable modifications:

N10 : Deamidated (NQ)

Ions Score: 77 Expect: 1.7e-006

Matches : 24/156 fragment ions using 31 most intense peaks ([help](#))

| #  | b         | b <sup>++</sup> | b <sup>*</sup> | b <sup>*++</sup> | b <sup>0</sup> | b <sup>0++</sup> | Seq. | y         | y <sup>++</sup> | y <sup>*</sup> | y <sup>*++</sup> | y <sup>0</sup> | y <sup>0++</sup> | #  |
|----|-----------|-----------------|----------------|------------------|----------------|------------------|------|-----------|-----------------|----------------|------------------|----------------|------------------|----|
| 1  | 130.0499  | 65.5286         |                |                  | 112.0393       | 56.5233          | E    |           |                 |                |                  |                |                  | 16 |
| 2  | 267.1088  | 134.0580        |                |                  | 249.0982       | 125.0527         | H    | 1764.7824 | 882.8948        | 1747.7558      | 874.3815         | 1746.7718      | 873.8895         | 15 |
| 3  | 396.1514  | 198.5793        |                |                  | 378.1408       | 189.5740         | E    | 1627.7235 | 814.3654        | 1610.6969      | 805.8521         | 1609.7129      | 805.3601         | 14 |
| 4  | 453.1728  | 227.0901        |                |                  | 435.1623       | 218.0848         | G    | 1498.6809 | 749.8441        | 1481.6543      | 741.3308         | 1480.6703      | 740.8388         | 13 |
| 5  | 524.2100  | 262.6086        |                |                  | 506.1994       | 253.6033         | A    | 1441.6594 | 721.3333        | 1424.6329      | 712.8201         | 1423.6488      | 712.3281         | 12 |
| 6  | 637.2940  | 319.1506        |                |                  | 619.2835       | 310.1454         | I    | 1370.6223 | 685.8148        | 1353.5957      | 677.3015         | 1352.6117      | 676.8095         | 11 |
| 7  | 800.3573  | 400.6823        |                |                  | 782.3468       | 391.6770         | Y    | 1257.5382 | 629.2728        | 1240.5117      | 620.7595         | 1239.5277      | 620.2675         | 10 |
| 8  | 897.4101  | 449.2087        |                |                  | 879.3995       | 440.2034         | P    | 1094.4749 | 547.7411        | 1077.4483      | 539.2278         | 1076.4643      | 538.7358         | 9  |
| 9  | 1012.4371 | 506.7222        |                |                  | 994.4265       | 497.7169         | D    | 997.4221  | 499.2147        | 980.3956       | 490.7014         | 979.4116       | 490.2094         | 8  |
| 10 | 1127.4640 | 564.2356        | 1110.4374      | 555.7224         | 1109.4534      | 555.2304         | N    | 882.3952  | 441.7012        | 865.3686       | 433.1880         | 864.3846       | 432.6959         | 7  |
| 11 | 1228.5117 | 614.7595        | 1211.4851      | 606.2462         | 1210.5011      | 605.7542         | T    | 767.3682  | 384.1878        | 750.3417       | 375.6745         | 749.3577       | 375.1825         | 6  |
| 12 | 1329.5594 | 665.2833        | 1312.5328      | 656.7700         | 1311.5488      | 656.2780         | T    | 666.3206  | 333.6639        | 649.2940       | 325.1506         | 648.3100       | 324.6586         | 5  |
| 13 | 1444.5863 | 722.7968        | 1427.5597      | 714.2835         | 1426.5757      | 713.7915         | D    | 565.2729  | 283.1401        | 548.2463       | 274.6268         | 547.2623       | 274.1348         | 4  |
| 14 | 1591.6547 | 796.3310        | 1574.6282      | 787.8177         | 1573.6441      | 787.3257         | F    | 450.2459  | 225.6266        | 433.2194       | 217.1133         |                |                  | 3  |
| 15 | 1719.7133 | 860.3603        | 1702.6867      | 851.8470         | 1701.7027      | 851.3550         | Q    | 303.1775  | 152.0924        | 286.1510       | 143.5791         |                |                  | 2  |
| 16 |           |                 |                |                  |                |                  | R    | 175.1190  | 88.0631         | 158.0924       | 79.5498          |                |                  | 1  |



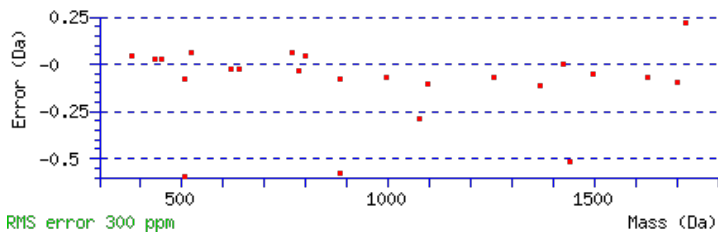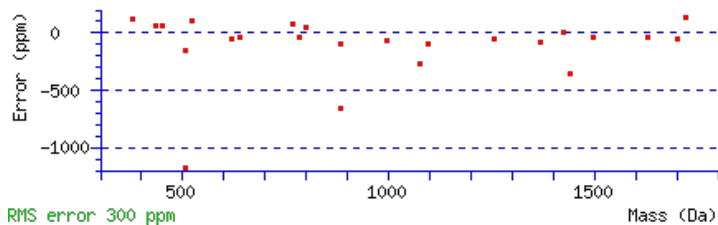

NCBI **BLAST** search of [EHEGAIYPDNTTDFQR](#)

(Parameters: blastp, nr protein database, expect=20000, no filter, PAM30)

Other BLAST [web gateways](#)

**All matches to this query**

| Score | Mr(calc)  | Delta   | Sequence                         | Site Analysis         |
|-------|-----------|---------|----------------------------------|-----------------------|
| 77.3  | 1892.8177 | 0.0087  | <a href="#">EHEGAIYPDNTTDFQR</a> | Deamidated N10 99.76% |
| 51.1  | 1892.8177 | 0.0087  | <a href="#">EHEGAIYPDNTTDFQR</a> | Deamidated Q15 0.24%  |
| 6.4   | 1892.8349 | -0.0086 | <a href="#">HQEVQDELEFITEKM</a>  |                       |
| 2.5   | 1891.8291 | 0.9972  | <a href="#">SNEQLLPAMDLMDDER</a> |                       |
| 2.5   | 1891.8291 | 0.9972  | <a href="#">SNEQLLPAMDLMDDER</a> |                       |

**Mascot:** <http://www.matrixscience.com/>

# MATRIX SCIENCE Mascot Search Results

## Peptide View

MS/MS Fragmentation of **AGLQAFFQVQECNKSSSK**

Found in **E9PFZ2** in **con\_Xuniprot\_HUMAN3**, E9PFZ2\_HUMAN Ceruloplasmin OS=Homo sapiens GN=CP PE=2 SV=1

Match to Query 12850: 2028.963888 from(1015.489220,2+) intensity(39348.0586) rtinseconds(1412) scans(3534) index(2640)

Title: 111019\_Est\_ISCardio\_NMI\_YP\_G\_5Spectrum2984\_scans\_\_3534

Data file C:\\mascot\\20140703\_Tmgf\_1D\\CSV\_UseAnalysis\\MasterCSV\\All\_Glyco\\mgf\\ptm\\UC18ERLIC\_PTM\_35D.mgf

Click mouse within plot area to zoom in by factor of two about that point

Or, to Da

Label all possible matches Label matches used for scoring

Show Y-axis

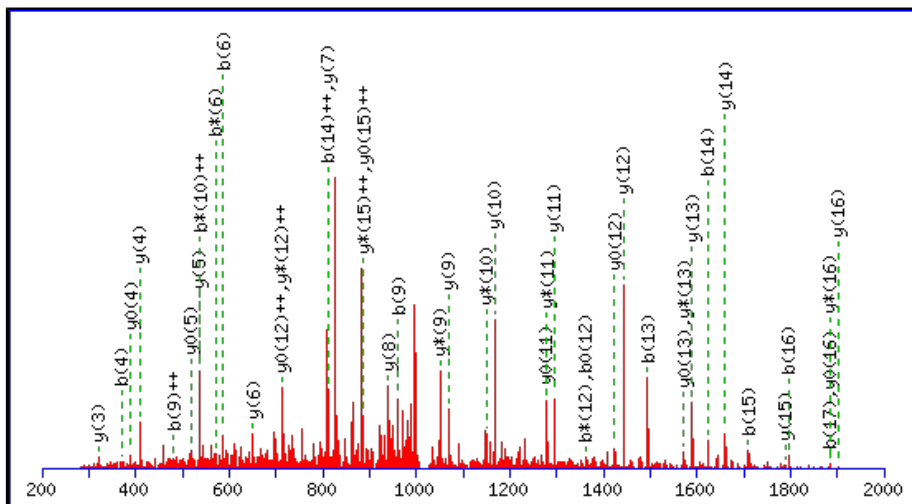

Monoisotopic mass of neutral peptide Mr(calc): 2028.9575

Fixed modifications: Carbamidomethyl (C) (apply to specified residues or termini only)

Variable modifications:

N13 : Deamidated (NQ)

Ions Score: 64 Expect: 8e-005

Matches : 43/176 fragment ions using 102 most intense peaks (help)

| #  | b                | b <sup>++</sup> | b <sup>*</sup>   | b <sup>*++</sup> | b <sup>0</sup>   | b <sup>0++</sup> | Seq. | y                | y <sup>++</sup> | y <sup>*</sup>   | y <sup>*++</sup> | y <sup>0</sup>   | y <sup>0++</sup> | #  |
|----|------------------|-----------------|------------------|------------------|------------------|------------------|------|------------------|-----------------|------------------|------------------|------------------|------------------|----|
| 1  | 72.0444          | 36.5258         |                  |                  |                  |                  | A    |                  |                 |                  |                  |                  |                  | 18 |
| 2  | 129.0659         | 65.0366         |                  |                  |                  |                  | G    | 1958.9277        | 979.9675        | 1941.9011        | 971.4542         | 1940.9171        | 970.9622         | 17 |
| 3  | 242.1499         | 121.5786        |                  |                  |                  |                  | L    | <b>1901.9062</b> | 951.4567        | <b>1884.8796</b> | 942.9435         | <b>1883.8956</b> | 942.4515         | 16 |
| 4  | <b>370.2085</b>  | 185.6079        | 353.1819         | 177.0946         |                  |                  | Q    | <b>1788.8221</b> | 894.9147        | 1771.7956        | <b>886.4014</b>  | 1770.8116        | <b>885.9094</b>  | 15 |
| 5  | 441.2456         | 221.1264        | 424.2191         | 212.6132         |                  |                  | A    | <b>1660.7635</b> | 830.8854        | 1643.7370        | 822.3721         | 1642.7530        | 821.8801         | 14 |
| 6  | <b>588.3140</b>  | 294.6607        | <b>571.2875</b>  | 286.1474         |                  |                  | F    | <b>1589.7264</b> | 795.3669        | <b>1572.6999</b> | 786.8536         | <b>1571.7159</b> | 786.3616         | 13 |
| 7  | 735.3824         | 368.1949        | 718.3559         | 359.6816         |                  |                  | F    | <b>1442.6580</b> | 721.8326        | 1425.6315        | <b>713.3194</b>  | <b>1424.6475</b> | <b>712.8274</b>  | 12 |
| 8  | 863.4410         | 432.2241        | 846.4145         | 423.7109         |                  |                  | Q    | <b>1295.5896</b> | 648.2984        | <b>1278.5631</b> | 639.7852         | <b>1277.5790</b> | 639.2932         | 11 |
| 9  | <b>962.5094</b>  | <b>481.7584</b> | 945.4829         | 473.2451         |                  |                  | V    | <b>1167.5310</b> | 584.2692        | <b>1150.5045</b> | 575.7559         | 1149.5205        | 575.2639         | 10 |
| 10 | 1090.5680        | 545.7876        | 1073.5415        | <b>537.2744</b>  |                  |                  | Q    | <b>1068.4626</b> | 534.7349        | <b>1051.4361</b> | 526.2217         | 1050.4520        | 525.7297         | 9  |
| 11 | 1219.6106        | 610.3089        | 1202.5841        | 601.7957         | 1201.6000        | 601.3037         | E    | <b>940.4040</b>  | 470.7057        | 923.3775         | 462.1924         | 922.3935         | 461.7004         | 8  |
| 12 | 1379.6413        | 690.3243        | <b>1362.6147</b> | 681.8110         | <b>1361.6307</b> | 681.3190         | C    | <b>811.3614</b>  | 406.1844        | 794.3349         | 397.6711         | 793.3509         | 397.1791         | 7  |
| 13 | <b>1494.6682</b> | 747.8377        | 1477.6416        | 739.3245         | 1476.6576        | 738.8325         | N    | <b>651.3308</b>  | 326.1690        | 634.3042         | 317.6558         | 633.3202         | 317.1638         | 6  |
| 14 | <b>1622.7632</b> | <b>811.8852</b> | 1605.7366        | 803.3719         | 1604.7526        | 802.8799         | K    | <b>536.3039</b>  | 268.6556        | 519.2773         | 260.1423         | <b>518.2933</b>  | 259.6503         | 5  |
| 15 | <b>1709.7952</b> | 855.4012        | 1692.7686        | 846.8880         | 1691.7846        | 846.3959         | S    | <b>408.2089</b>  | 204.6081        | 391.1823         | 196.0948         | <b>390.1983</b>  | 195.6028         | 4  |
| 16 | <b>1796.8272</b> | 898.9172        | 1779.8007        | 890.4040         | 1778.8166        | 889.9120         | S    | <b>321.1769</b>  | 161.0921        | 304.1503         | 152.5788         | 303.1663         | 152.0868         | 3  |
| 17 | <b>1883.8592</b> | 942.4333        | 1866.8327        | 933.9200         | 1865.8487        | 933.4280         | S    | 234.1448         | 117.5761        | 217.1183         | 109.0628         | 216.1343         | 108.5708         | 2  |
| 18 |                  |                 |                  |                  |                  |                  | K    | 147.1128         | 74.0600         | 130.0863         | 65.5468          |                  |                  | 1  |

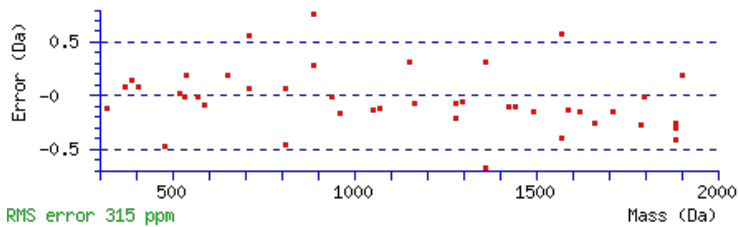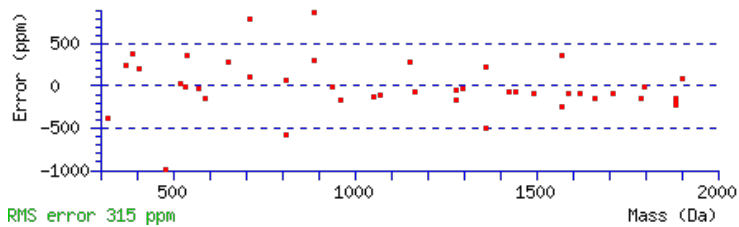

NCBI **BLAST** search of [AGLQAFFQVQECNKSSSK](#)  
 (Parameters: blastp, nr protein database, expect=20000, no filter, PAM30)  
 Other BLAST [web gateways](#)

**All matches to this query**

| Score | Mr(calc)  | Delta   | Sequence                            | Site Analysis         |
|-------|-----------|---------|-------------------------------------|-----------------------|
| 64.4  | 2028.9575 | 0.0064  | <a href="#">AGLQAFFQVQECNKSSSK</a>  | Deamidated N13 96.03% |
| 50.5  | 2028.9575 | 0.0064  | <a href="#">AGLQAFFQVQECNKSSSK</a>  | Deamidated Q10 3.88%  |
| 34.1  | 2028.9575 | 0.0064  | <a href="#">AGLQAFFQVQECNKSSSK</a>  | Deamidated Q8 0.09%   |
| 17.6  | 2028.9575 | 0.0064  | <a href="#">AGLQAFFQVQECNKSSSK</a>  | Deamidated Q4 0.00%   |
| 3.5   | 2028.9613 | 0.0026  | <a href="#">AGQGLQNGHEDGPAALAHK</a> |                       |
| 3.4   | 2028.9648 | -0.0009 | <a href="#">IKAKPRMDQYFNQMEK</a>    |                       |
| 3.4   | 2028.9648 | -0.0009 | <a href="#">LKAKPRMDQYFNQMEK</a>    |                       |
| 3.3   | 2028.9673 | -0.0034 | <a href="#">HSNLMLEDLDKSQEEIK</a>   |                       |
| 3.0   | 2028.9680 | -0.0041 | <a href="#">DLLQEEDFYILDQGGFK</a>   |                       |
| 3.0   | 2027.9557 | 1.0082  | <a href="#">NKAKPRMDQYFNQMEK</a>    |                       |

Mascot: <http://www.matrixscience.com/>

# MASCOT SCIENCE Mascot Search Results

## Peptide View

MS/MS Fragmentation of **AGLQAFFQVQECNKSSSKDNIR**

Found in **E9PFZ2** in **con\_Xuniprot\_HUMAN3**, E9PFZ2\_HUMAN Ceruloplasmin OS=Homo sapiens GN=CP PE=2 SV=1

Match to Query 21818: 2527.220292 from(843.414040,3+) intensity(52739.7734) rtinseconds(1394) scans(3204) index(753)

Title: 111019\_Est\_ISCardio\_NMI\_YP\_G\_2Spectrum2745\_scans\_\_3204

Data file C:\mascot\20140703\_Tmgf\_1D\CSV\_UseAnalysis\MasterCSV\All\_Glyco\mgf\ptm\UC18ERLIC\_PT\_M\_35D.mgf

Click mouse within plot area to zoom in by factor of two about that point

Or, to Da

Label all possible matches Label matches used for scoring

Show Y-axis

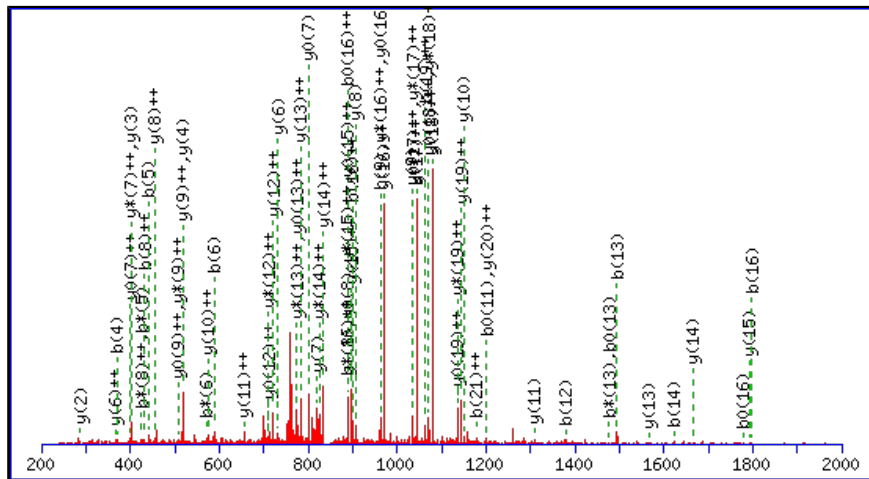

Monoisotopic mass of neutral peptide Mr(calc): 2527.2125

Fixed modifications: Carbamidomethyl (C) (apply to specified residues or termini only)

Variable modifications:

N13 : Deamidated (NQ)

Ions Score: 55 Expect: 0.00087

Matches : 69/220 fragment ions using 148 most intense peaks (help)

| #  | b         | b <sup>++</sup> | b <sup>*</sup> | b <sup>*++</sup> | b <sup>0</sup> | b <sup>0++</sup> | Seq. | y         | y <sup>++</sup> | y <sup>*</sup> | y <sup>*++</sup> | y <sup>0</sup> | y <sup>0++</sup> | #  |
|----|-----------|-----------------|----------------|------------------|----------------|------------------|------|-----------|-----------------|----------------|------------------|----------------|------------------|----|
| 1  | 72.0444   | 36.5258         |                |                  |                |                  | A    |           |                 |                |                  |                |                  | 22 |
| 2  | 129.0659  | 65.0366         |                |                  |                |                  | G    | 2457.1827 | 1229.0950       | 2440.1561      | 1220.5817        | 2439.1721      | 1220.0897        | 21 |
| 3  | 242.1499  | 121.5786        |                |                  |                |                  | L    | 2400.1612 | 1200.5843       | 2383.1347      | 1192.0710        | 2382.1507      | 1191.5790        | 20 |
| 4  | 370.2085  | 185.6079        | 353.1819       | 177.0946         |                |                  | Q    | 2287.0772 | 1144.0422       | 2270.0506      | 1135.5289        | 2269.0666      | 1135.0369        | 19 |
| 5  | 441.2456  | 221.1264        | 424.2191       | 212.6132         |                |                  | A    | 2159.0186 | 1080.0129       | 2141.9920      | 1071.4997        | 2141.0080      | 1071.0077        | 18 |
| 6  | 588.3140  | 294.6607        | 571.2875       | 286.1474         |                |                  | F    | 2087.9815 | 1044.4944       | 2070.9549      | 1035.9811        | 2069.9709      | 1035.4891        | 17 |
| 7  | 735.3824  | 368.1949        | 718.3559       | 359.6816         |                |                  | F    | 1940.9131 | 970.9602        | 1923.8865      | 962.4469         | 1922.9025      | 961.9549         | 16 |
| 8  | 863.4410  | 432.2241        | 846.4145       | 423.7109         |                |                  | Q    | 1793.8447 | 897.4260        | 1776.8181      | 888.9127         | 1775.8341      | 888.4207         | 15 |
| 9  | 962.5094  | 481.7584        | 945.4829       | 473.2451         |                |                  | V    | 1665.7861 | 833.3967        | 1648.7595      | 824.8834         | 1647.7755      | 824.3914         | 14 |
| 10 | 1090.5680 | 545.7876        | 1073.5415      | 537.2744         |                |                  | Q    | 1566.7177 | 783.8625        | 1549.6911      | 775.3492         | 1548.7071      | 774.8572         | 13 |
| 11 | 1219.6106 | 610.3089        | 1202.5841      | 601.7957         | 1201.6000      | 601.3037         | E    | 1438.6591 | 719.8332        | 1421.6325      | 711.3199         | 1420.6485      | 710.8279         | 12 |
| 12 | 1379.6413 | 690.3243        | 1362.6147      | 681.8110         | 1361.6307      | 681.3190         | C    | 1309.6165 | 655.3119        | 1292.5899      | 646.7986         | 1291.6059      | 646.3066         | 11 |
| 13 | 1494.6682 | 747.8377        | 1477.6416      | 739.3245         | 1476.6576      | 738.8325         | N    | 1149.5858 | 575.2966        | 1132.5593      | 566.7833         | 1131.5753      | 566.2913         | 10 |
| 14 | 1622.7632 | 811.8852        | 1605.7366      | 803.3719         | 1604.7526      | 802.8799         | K    | 1034.5589 | 517.7831        | 1017.5323      | 509.2698         | 1016.5483      | 508.7778         | 9  |
| 15 | 1709.7952 | 855.4012        | 1692.7686      | 846.8880         | 1691.7846      | 846.3959         | S    | 906.4639  | 453.7356        | 889.4374       | 445.2223         | 888.4534       | 444.7303         | 8  |
| 16 | 1796.8272 | 898.9172        | 1779.8007      | 890.4040         | 1778.8166      | 889.9120         | S    | 819.4319  | 410.2196        | 802.4054       | 401.7063         | 801.4213       | 401.2143         | 7  |
| 17 | 1883.8592 | 942.4333        | 1866.8327      | 933.9200         | 1865.8487      | 933.4280         | S    | 732.3999  | 366.7036        | 715.3733       | 358.1903         | 714.3893       | 357.6983         | 6  |
| 18 | 2011.9542 | 1006.4807       | 1994.9277      | 997.9675         | 1993.9436      | 997.4755         | K    | 645.3678  | 323.1876        | 628.3413       | 314.6743         | 627.3573       | 314.1823         | 5  |
| 19 | 2126.9811 | 1063.9942       | 2109.9546      | 1055.4809        | 2108.9706      | 1054.9889        | D    | 517.2729  | 259.1401        | 500.2463       | 250.6268         | 499.2623       | 250.1348         | 4  |
| 20 | 2241.0241 | 1121.0157       | 2223.9975      | 1112.5024        | 2223.0135      | 1112.0104        | N    | 402.2459  | 201.6266        | 385.2194       | 193.1133         |                |                  | 3  |
| 21 | 2354.1081 | 1177.5577       | 2337.0816      | 1169.0444        | 2336.0976      | 1168.5524        | I    | 288.2030  | 144.6051        | 271.1765       | 136.0919         |                |                  | 2  |
| 22 |           |                 |                |                  |                |                  | R    | 175.1190  | 88.0631         | 158.0924       | 79.5498          |                |                  | 1  |

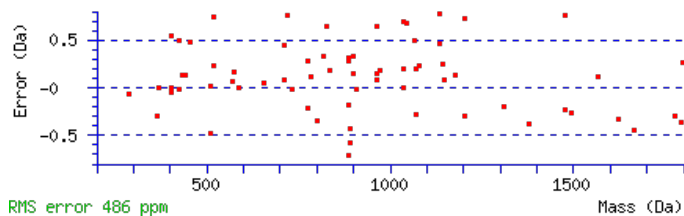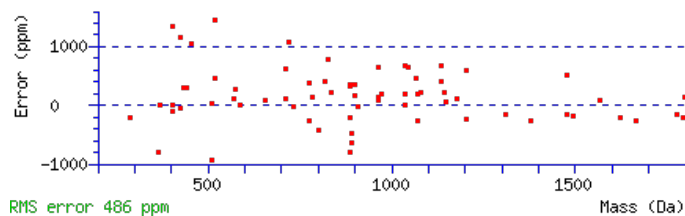

NCBI BLAST search of [AGLQAFFQVQECNKSSSKDNIR](#)

(Parameters: blastp, nr protein database, expect=20000, no filter, PAM30)

Other BLAST [web gateways](#)

All matches to this query

| Score | Mr(calc)  | Delta   | Sequence                                | Site Analysis         |
|-------|-----------|---------|-----------------------------------------|-----------------------|
| 54.6  | 2527.2125 | 0.0078  | <a href="#">AGLQAFFQVQECNKSSSKDNIR</a>  | Deamidated N13 54.73% |
| 50.7  | 2527.2125 | 0.0078  | <a href="#">AGLQAFFQVQECNKSSSKDNIR</a>  | Deamidated Q10 22.14% |
| 48.3  | 2527.2125 | 0.0078  | <a href="#">AGLQAFFQVQECNKSSSKDNIR</a>  | Deamidated Q8 12.74%  |
| 46.7  | 2527.2125 | 0.0078  | <a href="#">AGLQAFFQVQECNKSSSKDNIR</a>  | Deamidated N20 8.88%  |
| 46.1  | 2526.2285 | 0.9918  | <a href="#">AGLQAFFQVQECNKSSSKDNIR</a>  |                       |
| 39.1  | 2527.2125 | 0.0078  | <a href="#">AGLQAFFQVQECNKSSSKDNIR</a>  | Deamidated Q4 1.51%   |
| 4.8   | 2526.2141 | 1.0062  | <a href="#">NMQAKSPPPMNLGMNRRKPDLR</a>  |                       |
| 3.3   | 2525.2180 | 2.0023  | <a href="#">GVQSPNQSEMALVTINHIANTER</a> |                       |
| 3.2   | 2527.2278 | -0.0075 | <a href="#">LAFSADEFKQMQGRSFAGLDGR</a>  |                       |
| 2.5   | 2525.2115 | 2.0088  | <a href="#">QNEHNCVKLVPQSMPSLSQR</a>    |                       |

Mascot: <http://www.matrixscience.com/>

# MATRIX SCIENCE Mascot Search Results

## Peptide View

MS/MS Fragmentation of **ELHHLQEQNVSN AFLDKGEFYIGSKYK**

Found in **E9PFZ2** in **con\_Xuniprot\_HUMAN3**, E9PFZ2\_HUMAN Ceruloplasmin OS=Homo sapiens GN=CP PE=2 SV=1

Match to Query 27384: 3194.577416 from(799.651630,4+) intensity(44757.7930) rtinseconds(1514) scans(3750) index(14490)

Title: 111019\_Est\_MI\_YP\_G\_03Spectrum3228\_scans\_\_3750

Data file C:\mascot\20140703\_Tmgf\_1D\CSV\_UseAnalysis\MasterCSV\All\_Glyco\mgf\ptm\UC18ERLIC\_PTM\_35D.mgf

Click mouse within plot area to zoom in by factor of two about that point

Or,  to  Da

Label all possible matches  Label matches used for scoring

Show Y-axis

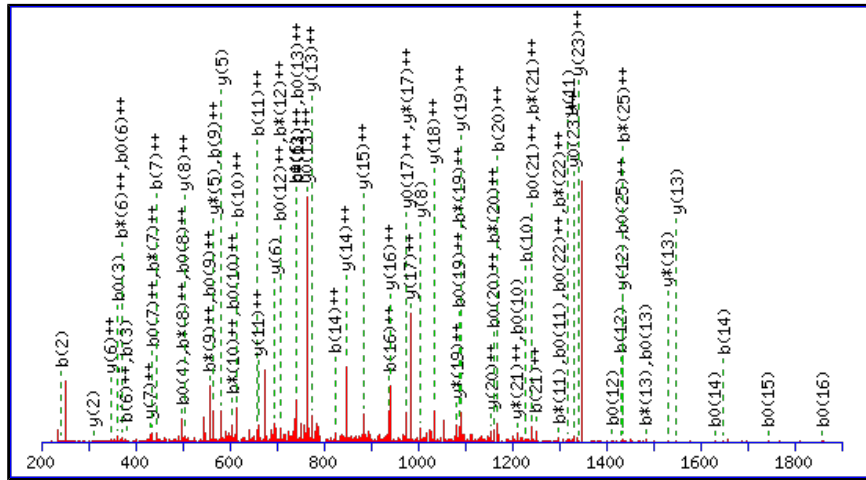

Monoisotopic mass of neutral peptide Mr(calc): 3194.5672

Fixed modifications: Carbamidomethyl (C) (apply to specified residues or termini only)

Variable modifications:

N9 : Deamidated (NQ)

Ions Score: 53 Expect: 0.0013

Matches : 78/296 fragment ions using 120 most intense peaks ([help](#))

| #  | b                | b <sup>++</sup>  | b <sup>*</sup>   | b <sup>*++</sup> | b <sup>0</sup>   | b <sup>0++</sup> | Seq. | y                | y <sup>++</sup>  | y <sup>*</sup>   | y <sup>*++</sup> | y <sup>0</sup> | y <sup>0++</sup> | #  |
|----|------------------|------------------|------------------|------------------|------------------|------------------|------|------------------|------------------|------------------|------------------|----------------|------------------|----|
| 1  | 130.0499         | 65.5286          |                  |                  | 112.0393         | 56.5233          | E    |                  |                  |                  |                  |                |                  | 27 |
| 2  | <b>243.1339</b>  | 122.0706         |                  |                  | 225.1234         | 113.0653         | L    | 3066.5320        | 1533.7696        | 3049.5054        | 1525.2563        | 3048.5214      | 1524.7643        | 26 |
| 3  | <b>380.1928</b>  | 190.6001         |                  |                  | <b>362.1823</b>  | 181.5948         | H    | 2953.4479        | 1477.2276        | 2936.4214        | 1468.7143        | 2935.4373      | 1468.2223        | 25 |
| 4  | 517.2518         | 259.1295         |                  |                  | <b>499.2412</b>  | 250.1242         | H    | 2816.3890        | 1408.6981        | 2799.3624        | 1400.1849        | 2798.3784      | 1399.6928        | 24 |
| 5  | 630.3358         | 315.6715         |                  |                  | 612.3253         | 306.6663         | L    | 2679.3301        | <b>1340.1687</b> | 2662.3035        | 1331.6554        | 2661.3195      | <b>1331.1634</b> | 23 |
| 6  | 758.3944         | <b>379.7008</b>  | 741.3678         | <b>371.1876</b>  | <b>740.3838</b>  | <b>370.6956</b>  | Q    | 2566.2460        | 1283.6266        | 2549.2195        | 1275.1134        | 2548.2354      | 1274.6214        | 22 |
| 7  | 887.4370         | <b>444.2221</b>  | 870.4104         | <b>435.7089</b>  | 869.4264         | <b>435.2169</b>  | E    | 2438.1874        | 1219.5974        | 2421.1609        | <b>1211.0841</b> | 2420.1769      | 1210.5921        | 21 |
| 8  | 1015.4956        | 508.2514         | 998.4690         | <b>499.7381</b>  | 997.4850         | <b>499.2461</b>  | Q    | 2309.1448        | <b>1155.0761</b> | 2292.1183        | 1146.5628        | 2291.1343      | 1146.0708        | 20 |
| 9  | 1130.5225        | <b>565.7649</b>  | 1113.4960        | <b>557.2516</b>  | 1112.5119        | <b>556.7596</b>  | N    | 2181.0863        | <b>1091.0468</b> | 2164.0597        | <b>1082.5335</b> | 2163.0757      | 1082.0415        | 19 |
| 10 | <b>1229.5909</b> | <b>615.2991</b>  | 1212.5644        | <b>606.7858</b>  | <b>1211.5804</b> | <b>606.2938</b>  | V    | 2066.0593        | <b>1033.5333</b> | 2049.0328        | 1025.0200        | 2048.0488      | 1024.5280        | 18 |
| 11 | 1316.6230        | <b>658.8151</b>  | <b>1299.5964</b> | 650.3018         | <b>1298.6124</b> | 649.8098         | S    | 1966.9909        | <b>983.9991</b>  | 1949.9644        | <b>975.4858</b>  | 1948.9803      | <b>974.9938</b>  | 17 |
| 12 | <b>1430.6659</b> | 715.8366         | 1413.6393        | <b>707.3233</b>  | <b>1412.6553</b> | <b>706.8313</b>  | N    | 1879.9589        | <b>940.4831</b>  | 1862.9323        | 931.9698         | 1861.9483      | 931.4778         | 16 |
| 13 | 1501.7030        | 751.3551         | <b>1484.6764</b> | <b>742.8419</b>  | <b>1483.6924</b> | <b>742.3499</b>  | A    | 1765.9160        | <b>883.4616</b>  | 1748.8894        | 874.9483         | 1747.9054      | 874.4563         | 15 |
| 14 | <b>1648.7714</b> | <b>824.8893</b>  | 1631.7449        | 816.3761         | <b>1630.7608</b> | 815.8841         | F    | 1694.8788        | <b>847.9431</b>  | 1677.8523        | 839.4298         | 1676.8683      | 838.9378         | 14 |
| 15 | 1761.8555        | 881.4314         | 1744.8289        | 872.9181         | <b>1743.8449</b> | 872.4261         | L    | <b>1547.8104</b> | <b>774.4088</b>  | <b>1530.7839</b> | 765.8956         | 1529.7999      | <b>765.4036</b>  | 13 |
| 16 | 1876.8824        | <b>938.9448</b>  | 1859.8559        | 930.4316         | <b>1858.8719</b> | 929.9396         | D    | <b>1434.7264</b> | 717.8668         | 1417.6998        | 709.3535         | 1416.7158      | 708.8615         | 12 |
| 17 | 2004.9774        | 1002.9923        | 1987.9508        | 994.4791         | 1986.9668        | 993.9870         | K    | <b>1319.6994</b> | <b>660.3533</b>  | 1302.6729        | 651.8401         | 1301.6889      | 651.3481         | 11 |
| 18 | 2061.9988        | 1031.5031        | 2044.9723        | 1022.9898        | 2043.9883        | 1022.4978        | G    | 1191.6045        | 596.3059         | 1174.5779        | 587.7926         | 1173.5939      | 587.3006         | 10 |
| 19 | 2191.0414        | 1096.0244        | 2174.0149        | <b>1087.5111</b> | 2173.0309        | <b>1087.0191</b> | E    | 1134.5830        | 567.7951         | 1117.5564        | 559.2819         | 1116.5724      | 558.7898         | 9  |
| 20 | 2338.1099        | <b>1169.5586</b> | 2321.0833        | <b>1161.0453</b> | 2320.0993        | <b>1160.5533</b> | F    | <b>1005.5404</b> | <b>503.2738</b>  | 988.5138         | 494.7606         | 987.5298       | 494.2686         | 8  |
| 21 | 2501.1732        | <b>1251.0902</b> | 2484.1466        | <b>1242.5770</b> | 2483.1626        | <b>1242.0849</b> | Y    | 858.4720         | <b>429.7396</b>  | 841.4454         | 421.2264         | 840.4614       | 420.7343         | 7  |
| 22 | 2614.2572        | 1307.6323        | 2597.2307        | <b>1299.1190</b> | 2596.2467        | <b>1298.6270</b> | I    | <b>695.4087</b>  | <b>348.2080</b>  | 678.3821         | 339.6947         | 677.3981       | 339.2027         | 6  |
| 23 | 2671.2787        | 1336.1430        | 2654.2522        | 1327.6297        | 2653.2681        | 1327.1377        | G    | <b>582.3246</b>  | 291.6659         | <b>565.2980</b>  | 283.1527         | 564.3140       | 282.6606         | 5  |

|    |           |           |           |           |           |           |   |          |          |          |          |          |          |   |
|----|-----------|-----------|-----------|-----------|-----------|-----------|---|----------|----------|----------|----------|----------|----------|---|
| 24 | 2758.3107 | 1379.6590 | 2741.2842 | 1371.1457 | 2740.3002 | 1370.6537 | S | 525.3031 | 263.1552 | 508.2766 | 254.6419 | 507.2926 | 254.1499 | 4 |
| 25 | 2886.4057 | 1443.7065 | 2869.3792 | 1435.1932 | 2868.3951 | 1434.7012 | K | 438.2711 | 219.6392 | 421.2445 | 211.1259 |          |          | 3 |
| 26 | 3049.4690 | 1525.2382 | 3032.4425 | 1516.7249 | 3031.4585 | 1516.2329 | Y | 310.1761 | 155.5917 | 293.1496 | 147.0784 |          |          | 2 |
| 27 |           |           |           |           |           |           | K | 147.1128 | 74.0600  | 130.0863 | 65.5468  |          |          | 1 |

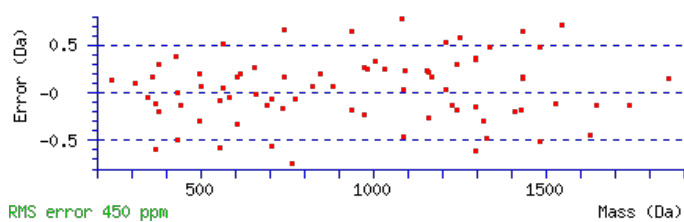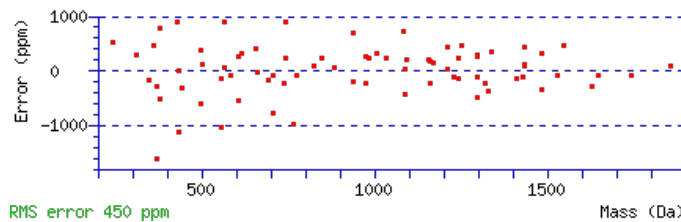

NCBI **BLAST** search of [ELHHLQEQNVSN AFLDKGEFYIGSKYK](#)  
 (Parameters: blastp, nr protein database, expect=20000, no filter, PAM30)  
 Other BLAST [web gateways](#)

**All matches to this query**

| Score | Mr(calc)  | Delta   | Sequence                                        | Site Analysis        |
|-------|-----------|---------|-------------------------------------------------|----------------------|
| 53.1  | 3194.5672 | 0.0102  | <a href="#">ELHHLQEQNVSN AFLDKGEFYIGSKYK</a>    | Deamidated N9 38.69% |
| 52.3  | 3194.5672 | 0.0102  | <a href="#">ELHHLQEQNVSN AFLDKGEFYIGSKYK</a>    | Deamidated Q8 32.26% |
| 51.5  | 3194.5672 | 0.0102  | <a href="#">ELHHLQEQNVSN AFLDKGEFYIGSKYK</a>    | Deamidated Q6 26.77% |
| 40.8  | 3194.5672 | 0.0102  | <a href="#">ELHHLQEQNVSN AFLDKGEFYIGSKYK</a>    | Deamidated N12 2.28% |
| 23.3  | 3193.5832 | 0.9942  | <a href="#">ELHHLQEQNVSN AFLDKGEFYIGSKYK</a>    |                      |
| 9.5   | 3192.5662 | 2.0112  | <a href="#">VLWTDDLAPQEC PHALWLQRKQGESSK</a>    |                      |
| 6.9   | 3193.5700 | 1.0074  | <a href="#">AQGSLSPPLADEMPTLPEAKIGEPTEGSINK</a> |                      |
| 5.3   | 3192.5689 | 2.0085  | <a href="#">TPSSQPLWLTGMPGTSVPYLLNFVQTS PR</a>  |                      |
| 5.1   | 3192.5714 | 2.0061  | <a href="#">SINYSKIDDFPNELEKLISIQPEVDR</a>      |                      |
| 5.0   | 3194.5906 | -0.0132 | <a href="#">AVTYHNWRHGFENVGQTMETLLMTGRLK</a>    |                      |

Mascot: <http://www.matrixscience.com/>



# MASCOT SCIENCE Mascot Search Results

## Peptide View

MS/MS Fragmentation of **ELHHLQEQNVSNAFLDKGEFYIGSK**

Found in **E9PFZ2** in **con\_Xuniprot\_HUMAN3**, E9PFZ2\_HUMAN Ceruloplasmin OS=Homo sapiens GN=CP PE=2 SV=1

Match to Query 26778: 2905.410732 from(969.477520,3+) intensity(24470.9688) rtinseconds(2289) scans(5724) index(15361)

Title: 111019\_Est\_MI\_YP\_G\_04Spectrum4942\_scans\_\_5724

Data file C:\mascot\20140703\_Tmgf\_1D\CSV\_UseAnalysis\MasterCSV\All\_Glyco\mgf\ptm\UC18ERLIC\_PTM\_35D.mgf

Click mouse within plot area to zoom in by factor of two about that point

Or, to Da

Label all possible matches Label matches used for scoring

Show Y-axis

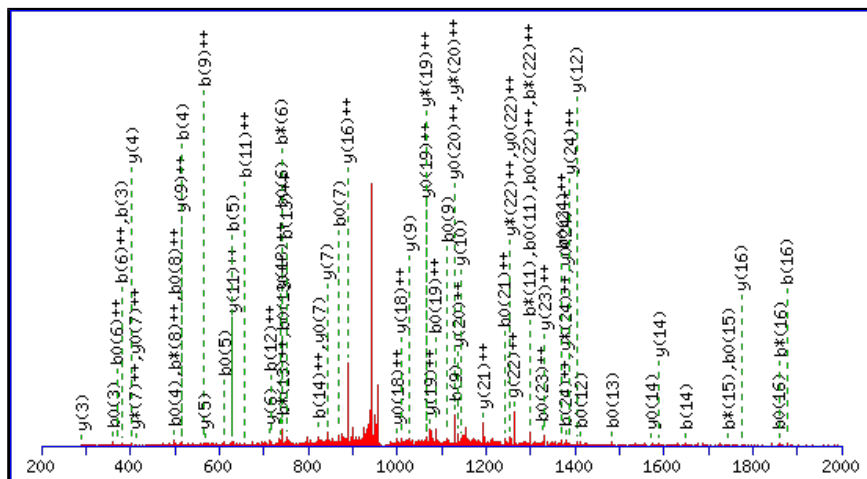

Monoisotopic mass of neutral peptide Mr(calc): 2904.3930

Fixed modifications: Carbamidomethyl (C) (apply to specified residues or termini only)

Variable modifications:

N9 : Deamidated (NQ)

N12 : Deamidated (NQ)

Ions Score: 41 Expect: 0.022

Matches : 73/276 fragment ions using 168 most intense peaks ([help](#))

| #  | b                | b <sup>++</sup> | b <sup>*</sup>   | b <sup>*++</sup> | b <sup>0</sup>   | b <sup>0++</sup> | Seq. | y                | y <sup>++</sup>  | y <sup>*</sup> | y <sup>*++</sup> | y <sup>0</sup>   | y <sup>0++</sup> | #  |
|----|------------------|-----------------|------------------|------------------|------------------|------------------|------|------------------|------------------|----------------|------------------|------------------|------------------|----|
| 1  | 130.0499         | 65.5286         |                  |                  | 112.0393         | 56.5233          | E    |                  |                  |                |                  |                  |                  | 25 |
| 2  | 243.1339         | 122.0706        |                  |                  | 225.1234         | 113.0653         | L    | 2776.3577        | 1388.6825        | 2759.3311      | 1380.1692        | 2758.3471        | 1379.6772        | 24 |
| 3  | <b>380.1928</b>  | 190.6001        |                  |                  | <b>362.1823</b>  | 181.5948         | H    | 2663.2736        | <b>1332.1404</b> | 2646.2471      | 1323.6272        | 2645.2631        | 1323.1352        | 23 |
| 4  | <b>517.2518</b>  | 259.1295        |                  |                  | <b>499.2412</b>  | 250.1242         | H    | 2526.2147        | <b>1263.6110</b> | 2509.1882      | <b>1255.0977</b> | 2508.2041        | <b>1254.6057</b> | 22 |
| 5  | <b>630.3358</b>  | 315.6715        |                  |                  | <b>612.3253</b>  | 306.6663         | L    | 2389.1558        | <b>1195.0815</b> | 2372.1292      | 1186.5683        | 2371.1452        | 1186.0763        | 21 |
| 6  | 758.3944         | <b>379.7008</b> | <b>741.3678</b>  | 371.1876         | <b>740.3838</b>  | <b>370.6956</b>  | Q    | 2276.0717        | <b>1138.5395</b> | 2259.0452      | <b>1130.0262</b> | 2258.0612        | <b>1129.5342</b> | 20 |
| 7  | 887.4370         | 444.2221        | 870.4104         | 435.7089         | <b>869.4264</b>  | 435.2169         | E    | 2148.0132        | <b>1074.5102</b> | 2130.9866      | <b>1065.9969</b> | 2130.0026        | <b>1065.5049</b> | 19 |
| 8  | 1015.4956        | 508.2514        | 998.4690         | <b>499.7381</b>  | 997.4850         | <b>499.2461</b>  | Q    | 2018.9706        | <b>1009.9889</b> | 2001.9440      | 1001.4756        | 2000.9600        | <b>1000.9836</b> | 18 |
| 9  | <b>1130.5225</b> | <b>565.7649</b> | 1113.4960        | 557.2516         | <b>1112.5119</b> | 556.7596         | N    | 1890.9120        | 945.9596         | 1873.8854      | 937.4464         | 1872.9014        | 936.9543         | 17 |
| 10 | 1229.5909        | 615.2991        | 1212.5644        | 606.7858         | 1211.5804        | 606.2938         | V    | <b>1775.8850</b> | <b>888.4462</b>  | 1758.8585      | 879.9329         | 1757.8745        | 879.4409         | 16 |
| 11 | 1316.6230        | <b>658.8151</b> | <b>1299.5964</b> | 650.3018         | <b>1298.6124</b> | 649.8098         | S    | 1676.8166        | 838.9120         | 1659.7901      | 830.3987         | 1658.8061        | 829.9067         | 15 |
| 12 | 1431.6499        | <b>716.3286</b> | 1414.6233        | 707.8153         | <b>1413.6393</b> | 707.3233         | N    | <b>1589.7846</b> | 795.3959         | 1572.7581      | 786.8827         | <b>1571.7740</b> | 786.3907         | 14 |
| 13 | 1502.6870        | <b>751.8471</b> | 1485.6605        | <b>743.3339</b>  | <b>1484.6764</b> | <b>742.8419</b>  | A    | 1474.7577        | <b>737.8825</b>  | 1457.7311      | 729.3692         | 1456.7471        | 728.8772         | 13 |
| 14 | <b>1649.7554</b> | <b>825.3814</b> | 1632.7289        | 816.8681         | 1631.7449        | 816.3761         | F    | <b>1403.7205</b> | 702.3639         | 1386.6940      | 693.8506         | 1385.7100        | 693.3586         | 12 |
| 15 | 1762.8395        | 881.9234        | <b>1745.8129</b> | 873.4101         | <b>1744.8289</b> | 872.9181         | L    | 1256.6521        | <b>628.8297</b>  | 1239.6256      | 620.3164         | 1238.6416        | 619.8244         | 11 |
| 16 | <b>1877.8664</b> | 939.4369        | <b>1860.8399</b> | 930.9236         | <b>1859.8559</b> | 930.4316         | D    | <b>1143.5681</b> | 572.2877         | 1126.5415      | 563.7744         | 1125.5575        | 563.2824         | 10 |
| 17 | 2005.9614        | 1003.4843       | 1988.9348        | 994.9711         | 1987.9508        | 994.4791         | K    | <b>1028.5411</b> | <b>514.7742</b>  | 1011.5146      | 506.2609         | 1010.5306        | 505.7689         | 9  |
| 18 | 2062.9829        | 1031.9951       | 2045.9563        | 1023.4818        | 2044.9723        | 1022.9898        | G    | 900.4462         | 450.7267         | 883.4196       | 442.2134         | 882.4356         | 441.7214         | 8  |
| 19 | 2192.0255        | 1096.5164       | 2174.9989        | 1088.0031        | 2174.0149        | <b>1087.5111</b> | E    | <b>843.4247</b>  | 422.2160         | 826.3981       | <b>413.7027</b>  | <b>825.4141</b>  | <b>413.2107</b>  | 7  |
| 20 | 2339.0939        | 1170.0506       | 2322.0673        | 1161.5373        | 2321.0833        | 1161.0453        | F    | <b>714.3821</b>  | 357.6947         | 697.3556       | 349.1814         | 696.3715         | 348.6894         | 6  |
| 21 | 2502.1572        | 1251.5822       | 2485.1306        | 1243.0690        | 2484.1466        | <b>1242.5770</b> | Y    | <b>567.3137</b>  | 284.1605         | 550.2871       | 275.6472         | 549.3031         | 275.1552         | 5  |
| 22 | 2615.2413        | 1308.1243       | 2598.2147        | <b>1299.6110</b> | 2597.2307        | <b>1299.1190</b> | I    | <b>404.2504</b>  | 202.6288         | 387.2238       | 194.1155         | 386.2398         | 193.6235         | 4  |

|    |           |           |           |           |           |           |   |          |          |          |          |          |          |   |
|----|-----------|-----------|-----------|-----------|-----------|-----------|---|----------|----------|----------|----------|----------|----------|---|
| 23 | 2672.2627 | 1336.6350 | 2655.2362 | 1328.1217 | 2654.2522 | 1327.6297 | G | 291.1663 | 146.0868 | 274.1397 | 137.5735 | 273.1557 | 137.0815 | 3 |
| 24 | 2759.2948 | 1380.1510 | 2742.2682 | 1371.6377 | 2741.2842 | 1371.1457 | S | 234.1448 | 117.5761 | 217.1183 | 109.0628 | 216.1343 | 108.5708 | 2 |
| 25 |           |           |           |           |           |           | K | 147.1128 | 74.0600  | 130.0863 | 65.5468  |          |          | 1 |

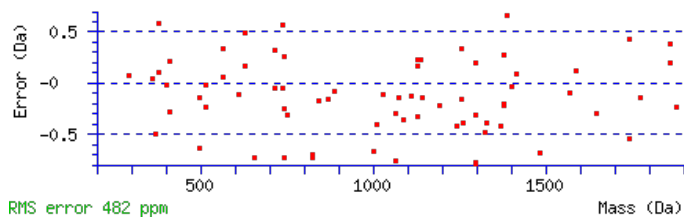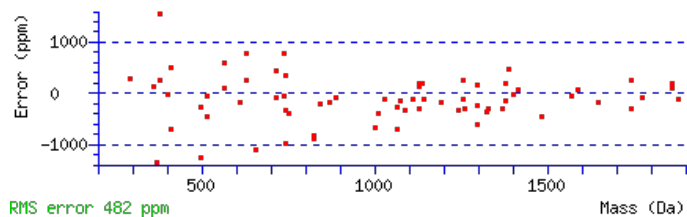

NCBI BLAST search of [ELHHLQEQNVSN AFLDKGEFYIGSK](#)  
 (Parameters: blastp, nr protein database, expect=20000, no filter, PAM30)  
 Other BLAST [web gateways](#)

All matches to this query

| Score | Mr(calc)  | Delta  | Sequence                                   | Site Analysis             |
|-------|-----------|--------|--------------------------------------------|---------------------------|
| 41.0  | 2904.3930 | 1.0178 | <a href="#">ELHHLQEQNVSN AFLDKGEFYIGSK</a> | Deamidated N9, N12 23.60% |
| 41.0  | 2904.3930 | 1.0178 | <a href="#">ELHHLQEQNVSN AFLDKGEFYIGSK</a> | Deamidated Q8, N12 23.60% |
| 39.4  | 2903.4090 | 2.0018 | <a href="#">ELHHLQEQNVSN AFLDKGEFYIGSK</a> |                           |
| 39.3  | 2904.3930 | 1.0178 | <a href="#">ELHHLQEQNVSN AFLDKGEFYIGSK</a> | Deamidated Q6, N12 15.92% |
| 39.2  | 2904.3930 | 1.0178 | <a href="#">ELHHLQEQNVSN AFLDKGEFYIGSK</a> | Deamidated Q8, N9 15.66%  |
| 38.6  | 2903.4090 | 2.0018 | <a href="#">ELHHLQEQNVSN AFLDKGEFYIGSK</a> |                           |
| 38.6  | 2903.4090 | 2.0018 | <a href="#">ELHHLQEQNVSN AFLDKGEFYIGSK</a> |                           |
| 37.5  | 2904.3930 | 1.0178 | <a href="#">ELHHLQEQNVSN AFLDKGEFYIGSK</a> | Deamidated Q6, N9 10.61%  |
| 37.5  | 2904.3930 | 1.0178 | <a href="#">ELHHLQEQNVSN AFLDKGEFYIGSK</a> | Deamidated Q6, Q8 10.61%  |
| 31.9  | 2903.4090 | 2.0018 | <a href="#">ELHHLQEQNVSN AFLDKGEFYIGSK</a> |                           |

Mascot: <http://www.matrixscience.com/>

# MASCOT SCIENCE Mascot Search Results

## Peptide View

MS/MS Fragmentation of **ELHHLQEQNVSNAFLDK**

Found in **E9PFZ2** in **con\_Xuniprot\_HUMAN3**, E9PFZ2\_HUMAN Ceruloplasmin OS=Homo sapiens GN=CP PE=2 SV=1

Match to Query 12756: 2022.970422 from(675.330750,3+) intensity(0.0000) rtinseconds(1035) scans(2449) index(1230)

Title: 111019\_Est\_ISCardio\_NMI\_YP\_G\_3Spectrum2097\_scans\_2449

Data file C:\\mascot\\20140703\_Tmgf\_1D\\CSV\_UseAnalysis\\MasterCSV\\All\_Glyco\\mgf\\ptm\\UC18ERLIC\_PTM\_35D.mgf

Click mouse within plot area to zoom in by factor of two about that point

Or, to Da

Label all possible matches Label matches used for scoring

Show Y-axis

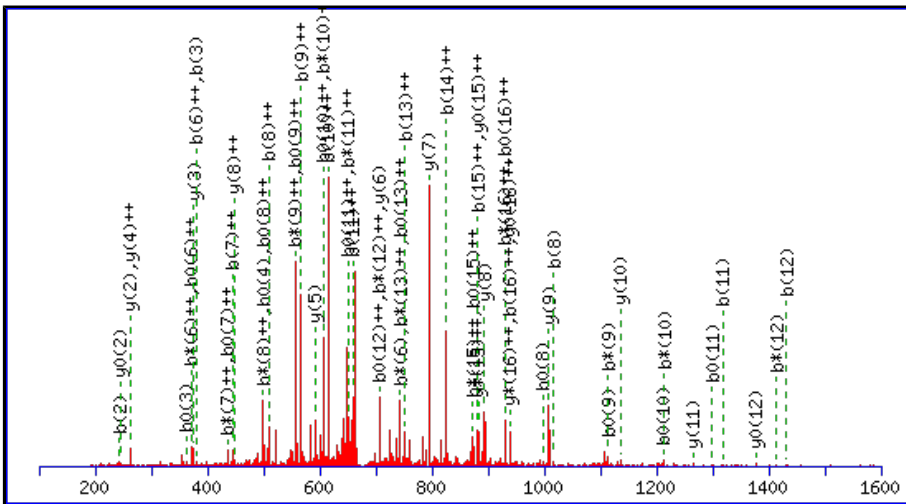

Monoisotopic mass of neutral peptide Mr(calc): 2022.9646

Fixed modifications: Carbamidomethyl (C) (apply to specified residues or termini only)

Variable modifications:

Q6 : Deamidated (NQ)

N9 : Deamidated (NQ)

Ions Score: 40 Expect: 0.024

Matches : 62/180 fragment ions using 95 most intense peaks ([help](#))

| #  | b                | b <sup>++</sup> | b*               | b <sup>***</sup> | b <sup>0</sup>  | b <sup>0++</sup> | Seq. | y                | y <sup>++</sup> | y*        | y <sup>***</sup> | y <sup>0</sup>   | y <sup>0++</sup> | #  |
|----|------------------|-----------------|------------------|------------------|-----------------|------------------|------|------------------|-----------------|-----------|------------------|------------------|------------------|----|
| 1  | 130.0499         | 65.5286         |                  |                  | 112.0393        | 56.5233          | E    |                  |                 |           |                  |                  |                  | 17 |
| 2  | <b>243.1339</b>  | 122.0706        |                  |                  | 225.1234        | 113.0653         | L    | 1894.9294        | 947.9683        | 1877.9028 | <b>939.4550</b>  | 1876.9188        | <b>938.9630</b>  | 16 |
| 3  | <b>380.1928</b>  | 190.6001        |                  |                  | <b>362.1823</b> | 181.5948         | H    | 1781.8453        | 891.4263        | 1764.8188 | <b>882.9130</b>  | 1763.8347        | <b>882.4210</b>  | 15 |
| 4  | 517.2518         | 259.1295        |                  |                  | <b>499.2412</b> | 250.1242         | H    | 1644.7864        | 822.8968        | 1627.7598 | 814.3836         | 1626.7758        | 813.8916         | 14 |
| 5  | 630.3358         | 315.6715        |                  |                  | 612.3253        | 306.6663         | L    | 1507.7275        | 754.3674        | 1490.7009 | 745.8541         | 1489.7169        | 745.3621         | 13 |
| 6  | 759.3784         | <b>380.1928</b> | <b>742.3519</b>  | <b>371.6796</b>  | 741.3678        | <b>371.1876</b>  | Q    | 1394.6434        | 697.8253        | 1377.6169 | 689.3121         | <b>1376.6329</b> | 688.8201         | 12 |
| 7  | 888.4210         | <b>444.7141</b> | 871.3945         | <b>436.2009</b>  | 870.4104        | <b>435.7089</b>  | E    | <b>1265.6008</b> | 633.3040        | 1248.5743 | 624.7908         | 1247.5903        | 624.2988         | 11 |
| 8  | <b>1016.4796</b> | <b>508.7434</b> | 999.4530         | <b>500.2302</b>  | <b>998.4690</b> | <b>499.7381</b>  | Q    | <b>1136.5582</b> | 568.7828        | 1119.5317 | 560.2695         | 1118.5477        | 559.7775         | 10 |
| 9  | 1131.5065        | <b>566.2569</b> | 1114.4800        | <b>557.7436</b>  | 1113.4960       | <b>557.2516</b>  | N    | <b>1008.4997</b> | 504.7535        | 991.4731  | 496.2402         | 990.4891         | 495.7482         | 9  |
| 10 | 1230.5749        | <b>615.7911</b> | 1213.5484        | <b>607.2778</b>  | 1212.5644       | <b>606.7858</b>  | V    | <b>893.4727</b>  | <b>447.2400</b> | 876.4462  | 438.7267         | 875.4621         | 438.2347         | 8  |
| 11 | <b>1317.6070</b> | <b>659.3071</b> | 1300.5804        | <b>650.7938</b>  | 1299.5964       | <b>650.3018</b>  | S    | <b>794.4043</b>  | 397.7058        | 777.3777  | 389.1925         | 776.3937         | 388.7005         | 7  |
| 12 | <b>1431.6499</b> | 716.3286        | <b>1414.6233</b> | <b>707.8153</b>  | 1413.6393       | <b>707.3233</b>  | N    | <b>707.3723</b>  | 354.1898        | 690.3457  | 345.6765         | 689.3617         | 345.1845         | 6  |
| 13 | 1502.6870        | <b>751.8471</b> | 1485.6605        | <b>743.3339</b>  | 1484.6764       | <b>742.8419</b>  | A    | <b>593.3293</b>  | 297.1683        | 576.3028  | 288.6550         | 575.3188         | 288.1630         | 5  |
| 14 | 1649.7554        | <b>825.3814</b> | 1632.7289        | 816.8681         | 1631.7449       | 816.3761         | F    | 522.2922         | <b>261.6498</b> | 505.2657  | 253.1365         | 504.2817         | 252.6445         | 4  |
| 15 | 1762.8395        | <b>881.9234</b> | 1745.8129        | <b>873.4101</b>  | 1744.8289       | <b>872.9181</b>  | L    | <b>375.2238</b>  | 188.1155        | 358.1973  | 179.6023         | 357.2132         | 179.1103         | 3  |
| 16 | 1877.8664        | <b>939.4369</b> | 1860.8399        | <b>930.9236</b>  | 1859.8559       | <b>930.4316</b>  | D    | <b>262.1397</b>  | 131.5735        | 245.1132  | 123.0602         | <b>244.1292</b>  | 122.5682         | 2  |
| 17 |                  |                 |                  |                  |                 |                  | K    | 147.1128         | 74.0600         | 130.0863  | 65.5468          |                  |                  | 1  |

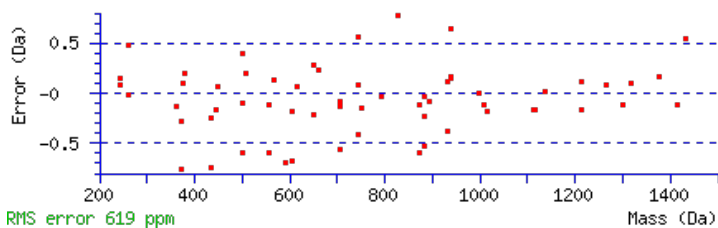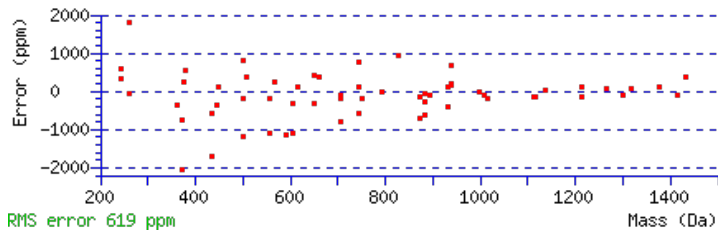

NCBI BLAST search of [ELHHLQEQNVSN AFLDK](#)

(Parameters: blastp, nr protein database, expect=20000, no filter, PAM30)

Other BLAST [web gateways](#)

All matches to this query

| Score | Mr(calc)  | Delta  | Sequence                           | Site Analysis             |
|-------|-----------|--------|------------------------------------|---------------------------|
| 40.4  | 2022.9646 | 0.0058 | <a href="#">ELHHLQEQNVSN AFLDK</a> | Deamidated Q6, N9 21.97%  |
| 39.6  | 2022.9646 | 0.0058 | <a href="#">ELHHLQEQNVSN AFLDK</a> | Deamidated Q8, N9 18.62%  |
| 39.3  | 2022.9646 | 0.0058 | <a href="#">ELHHLQEQNVSN AFLDK</a> | Deamidated Q6, N12 17.25% |
| 38.6  | 2022.9646 | 0.0058 | <a href="#">ELHHLQEQNVSN AFLDK</a> | Deamidated Q8, N12 14.62% |
| 38.5  | 2022.9646 | 0.0058 | <a href="#">ELHHLQEQNVSN AFLDK</a> | Deamidated N9, N12 14.45% |
| 38.1  | 2022.9646 | 0.0058 | <a href="#">ELHHLQEQNVSN AFLDK</a> | Deamidated Q6, Q8 13.09%  |
| 5.4   | 2021.9615 | 1.0089 | <a href="#">LLNHIMESYIQGSQKDK</a>  |                           |
| 5.3   | 2021.9694 | 1.0010 | <a href="#">NGFDFVIDENAPVTERAK</a> |                           |
| 4.0   | 2021.9727 | 0.9977 | <a href="#">DQQFLNLMKLNENIR</a>    |                           |
| 4.0   | 2021.9727 | 0.9977 | <a href="#">DQQFLNLMKLNENIR</a>    |                           |

Mascot: <http://www.matrixscience.com/>

# MASCOT SCIENCE Mascot Search Results

## Peptide View

MS/MS Fragmentation of **DKLAACLEGNCAEGLGTNYRGHVNTR**

Found in **C9JV37** in **con\_Xuniprot\_HUMAN3**, C9JV37\_HUMAN Thrombin light chain (Fragment) OS=Homo sapiens GN=F2 PE=2 SV=1

Match to Query 27203: 2989.419672 from(997.480500,3+) intensity(19859.2129) rtinseconds(1230) scans(2834) index(8272)

Title: 111019\_Est\_ISCardio\_NMI\_YS\_G\_3Spectrum2394\_scans\_\_2834

Data file C:\mascot\20140703\_Tmgf\_1D\CSV\_UseAnalysis\MasterCSV\All\_Glyco\mgf\ptm\UC18ERLIC\_PTM\_35D.mgf

Click mouse within plot area to zoom in by factor of two about that point

Or, to Da

Label all possible matches Label matches used for scoring

Show Y-axis

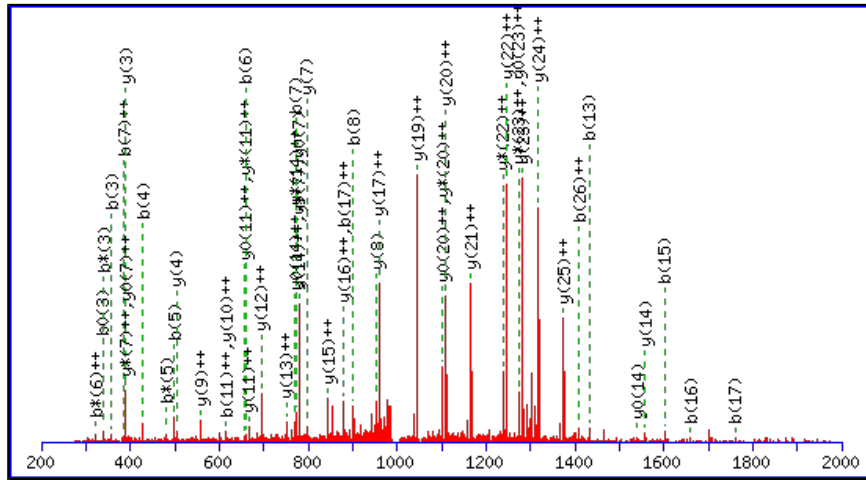

Monoisotopic mass of neutral peptide Mr(calc): 2989.4134

Fixed modifications: Carbamidomethyl (C) (apply to specified residues or termini only)

Variable modifications:

N24 : Deamidated (NQ)

Ions Score: 87 Expect: 5.4e-007

Matches : 53/308 fragment ions using 85 most intense peaks ([help](#))

| #  | b                | b <sup>++</sup> | b <sup>*</sup>  | b <sup>*++</sup> | b <sup>0</sup>  | b <sup>0++</sup> | Seq.     | y                | y <sup>++</sup>  | y <sup>*</sup>  | y <sup>*++</sup> | y <sup>0</sup>   | y <sup>0++</sup> | #  |
|----|------------------|-----------------|-----------------|------------------|-----------------|------------------|----------|------------------|------------------|-----------------|------------------|------------------|------------------|----|
| 1  | 116.0342         | 58.5207         |                 |                  | 98.0237         | 49.5155          | <b>D</b> |                  |                  |                 |                  |                  |                  | 27 |
| 2  | 244.1292         | 122.5682        | 227.1026        | 114.0550         | 226.1186        | 113.5629         | <b>K</b> | 2875.3938        | 1438.2005        | 2858.3672       | 1429.6873        | 2857.3832        | 1429.1952        | 26 |
| 3  | <b>357.2132</b>  | 179.1103        | <b>340.1867</b> | 170.5970         | <b>339.2027</b> | 170.1050         | <b>L</b> | 2747.2988        | <b>1374.1530</b> | 2730.2723       | 1365.6398        | 2729.2882        | 1365.1478        | 25 |
| 4  | <b>428.2504</b>  | 214.6288        | 411.2238        | 206.1155         | 410.2398        | 205.6235         | <b>A</b> | 2634.2147        | <b>1317.6110</b> | 2617.1882       | 1309.0977        | 2616.2042        | 1308.6057        | 24 |
| 5  | <b>499.2875</b>  | 250.1474        | <b>482.2609</b> | 241.6341         | 481.2769        | 241.1421         | <b>A</b> | 2563.1776        | <b>1282.0925</b> | 2546.1511       | <b>1273.5792</b> | 2545.1671        | <b>1273.0872</b> | 23 |
| 6  | <b>659.3181</b>  | 330.1627        | 642.2916        | <b>321.6494</b>  | 641.3076        | 321.1574         | <b>C</b> | 2492.1405        | <b>1246.5739</b> | 2475.1140       | <b>1238.0606</b> | 2474.1300        | 1237.5686        | 22 |
| 7  | <b>772.4022</b>  | <b>386.7047</b> | 755.3756        | 378.1915         | 754.3916        | 377.6994         | <b>L</b> | 2332.1099        | <b>1166.5586</b> | 2315.0833       | 1158.0453        | 2314.0993        | 1157.5533        | 21 |
| 8  | <b>901.4448</b>  | 451.2260        | 884.4182        | 442.7128         | 883.4342        | 442.2207         | <b>E</b> | 2219.0258        | <b>1110.0165</b> | 2201.9993       | <b>1101.5033</b> | 2201.0152        | <b>1101.0113</b> | 20 |
| 9  | 958.4662         | 479.7368        | 941.4397        | 471.2235         | 940.4557        | 470.7315         | <b>G</b> | 2089.9832        | <b>1045.4952</b> | 2072.9567       | 1036.9820        | 2071.9726        | 1036.4900        | 19 |
| 10 | 1072.5092        | 536.7582        | 1055.4826       | 528.2449         | 1054.4986       | 527.7529         | <b>N</b> | 2032.9617        | 1016.9845        | 2015.9352       | 1008.4712        | 2014.9512        | 1007.9792        | 18 |
| 11 | 1232.5398        | <b>616.7735</b> | 1215.5133       | 608.2603         | 1214.5293       | 607.7683         | <b>C</b> | 1918.9188        | <b>959.9630</b>  | 1901.8923       | 951.4498         | 1900.9083        | 950.9578         | 17 |
| 12 | 1303.5769        | 652.2921        | 1286.5504       | 643.7788         | 1285.5664       | 643.2868         | <b>A</b> | 1758.8882        | <b>879.9477</b>  | 1741.8616       | 871.4344         | 1740.8776        | 870.9424         | 16 |
| 13 | <b>1432.6195</b> | 716.8134        | 1415.5930       | 708.3001         | 1414.6090       | 707.8081         | <b>E</b> | 1687.8511        | <b>844.4292</b>  | 1670.8245       | 835.9159         | 1669.8405        | 835.4239         | 15 |
| 14 | 1489.6410        | 745.3241        | 1472.6144       | 736.8109         | 1471.6304       | 736.3189         | <b>G</b> | <b>1558.8085</b> | <b>779.9079</b>  | 1541.7819       | <b>771.3946</b>  | <b>1540.7979</b> | <b>770.9026</b>  | 14 |
| 15 | <b>1602.7251</b> | 801.8662        | 1585.6985       | 793.3529         | 1584.7145       | 792.8609         | <b>L</b> | 1501.7870        | <b>751.3971</b>  | 1484.7605       | 742.8839         | 1483.7764        | 742.3919         | 13 |
| 16 | <b>1659.7465</b> | 830.3769        | 1642.7200       | 821.8636         | 1641.7360       | 821.3716         | <b>G</b> | 1388.7029        | <b>694.8551</b>  | 1371.6764       | 686.3418         | 1370.6924        | 685.8498         | 12 |
| 17 | <b>1760.7942</b> | <b>880.9007</b> | 1743.7676       | 872.3875         | 1742.7836       | 871.8955         | <b>T</b> | 1331.6815        | <b>666.3444</b>  | 1314.6549       | <b>657.8311</b>  | 1313.6709        | <b>657.3391</b>  | 11 |
| 18 | 1874.8371        | 937.9222        | 1857.8106       | 929.4089         | 1856.8266       | 928.9169         | <b>N</b> | 1230.6338        | <b>615.8205</b>  | 1213.6072       | 607.3073         | 1212.6232        | 606.8153         | 10 |
| 19 | 2037.9005        | 1019.4539       | 2020.8739       | 1010.9406        | 2019.8899       | 1010.4486        | <b>Y</b> | 1116.5909        | <b>558.7991</b>  | 1099.5643       | 550.2858         | 1098.5803        | 549.7938         | 9  |
| 20 | 2194.0016        | 1097.5044       | 2176.9750       | 1088.9911        | 2175.9910       | 1088.4991        | <b>R</b> | <b>953.5275</b>  | 477.2674         | 936.5010        | 468.7541         | 935.5170         | 468.2621         | 8  |
| 21 | 2251.0230        | 1126.0152       | 2233.9965       | 1117.5019        | 2233.0125       | 1117.0099        | <b>G</b> | <b>797.4264</b>  | 399.2169         | <b>780.3999</b> | <b>390.7036</b>  | <b>779.4159</b>  | <b>390.2116</b>  | 7  |
| 22 | 2388.0819        | 1194.5446       | 2371.0554       | 1186.0313        | 2370.0714       | 1185.5393        | <b>H</b> | 740.4050         | 370.7061         | 723.3784        | 362.1928         | 722.3944         | 361.7008         | 6  |
| 23 | 2487.1504        | 1244.0788       | 2470.1238       | 1235.5655        | 2469.1398       | 1235.0735        | <b>V</b> | 603.3461         | 302.1767         | 586.3195        | 293.6634         | 585.3355         | 293.1714         | 5  |

|    |           |           |           |           |           |           |   |          |          |          |          |          |          |   |
|----|-----------|-----------|-----------|-----------|-----------|-----------|---|----------|----------|----------|----------|----------|----------|---|
| 24 | 2602.1773 | 1301.5923 | 2585.1507 | 1293.0790 | 2584.1667 | 1292.5870 | N | 504.2776 | 252.6425 | 487.2511 | 244.1292 | 486.2671 | 243.6372 | 4 |
| 25 | 2715.2614 | 1358.1343 | 2698.2348 | 1349.6210 | 2697.2508 | 1349.1290 | I | 389.2507 | 195.1290 | 372.2241 | 186.6157 | 371.2401 | 186.1237 | 3 |
| 26 | 2816.3090 | 1408.6582 | 2799.2825 | 1400.1449 | 2798.2985 | 1399.6529 | T | 276.1666 | 138.5870 | 259.1401 | 130.0737 | 258.1561 | 129.5817 | 2 |
| 27 |           |           |           |           |           |           | R | 175.1190 | 88.0631  | 158.0924 | 79.5498  |          |          | 1 |

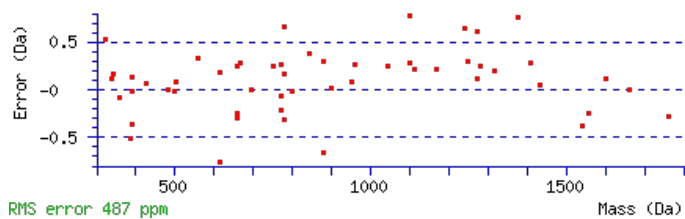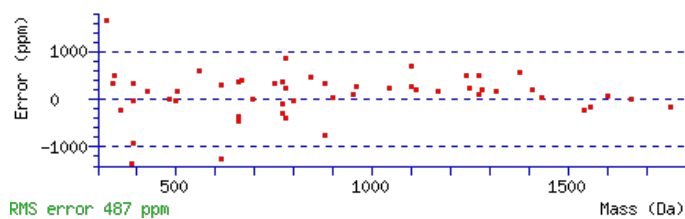

NCBI BLAST search of [DKLAACLEGNCAEGLGTNYRGHVNITR](#)  
 (Parameters: blastp, nr protein database, expect=20000, no filter, PAM30)  
 Other BLAST [web gateways](#)

All matches to this query

| Score | Mr(calc)  | Delta   | Sequence                                     | Site Analysis         |
|-------|-----------|---------|----------------------------------------------|-----------------------|
| 86.9  | 2989.4134 | 0.0063  | <a href="#">DKLAACLEGNCAEGLGTNYRGHVNITR</a>  | Deamidated N24 97.91% |
| 70.0  | 2989.4134 | 0.0063  | <a href="#">DKLAACLEGNCAEGLGTNYRGHVNITR</a>  | Deamidated N18 2.04%  |
| 56.5  | 2988.4294 | 0.9903  | <a href="#">DKLAACLEGNCAEGLGTNYRGHVNITR</a>  |                       |
| 54.3  | 2989.4134 | 0.0063  | <a href="#">DKLAACLEGNCAEGLGTNYRGHVNITR</a>  | Deamidated N10 0.05%  |
| 6.9   | 2989.4339 | -0.0142 | <a href="#">TPNMAVVGEPNGIFEQSQSELVEKETR</a>  |                       |
| 4.7   | 2989.4049 | 0.0148  | <a href="#">LKEGSLGINPSQVSKTGFVFCSDDEMK</a>  |                       |
| 4.5   | 2988.4108 | 1.0089  | <a href="#">RHNAGSNPTPPASVMGSPSSLQEAQRGR</a> |                       |
| 4.5   | 2988.4108 | 1.0089  | <a href="#">RHNAGSNPTPPASVMGSPSSLQEAQRGR</a> |                       |
| 4.3   | 2987.4267 | 1.9929  | <a href="#">RHNAGSNPTPPASVMGSPSSLQEAQRGR</a> |                       |
| 2.9   | 2987.4083 | 2.0114  | <a href="#">QLNDTLDAIEDGTQKVQNNIFHMWR</a>    |                       |

Mascot: <http://www.matrixscience.com/>



# MATRIX SCIENCE Mascot Search Results

## Peptide View

MS/MS Fragmentation of **LAACLEGNCAEGLGTNYRGHVNITR**

Found in **C9JV37** in **con\_Xuniprot\_HUMAN3**, C9JV37\_HUMAN Thrombin light chain (Fragment) OS=Homo sapiens GN=F2 PE=2 SV=1

Match to Query 25462: 2746.298412 from(916.440080,3+) intensity(58875.9648) rtinseconds(1118) scans(2522) index(8252)

Title: 111019\_Est\_ISCardio\_NMI\_YS\_G\_3Spectrum2123\_scans\_\_2522

Data file C:\mascot\20140703\_Tmgf\_1D\CSV\_UseAnalysis\MasterCSV\All\_Glyco\mgf\ptm\UC18ERLIC\_PTM\_35D.mgf

Click mouse within plot area to zoom in by factor of two about that point

Or, to Da

Label all possible matches Label matches used for scoring

Show Y-axis

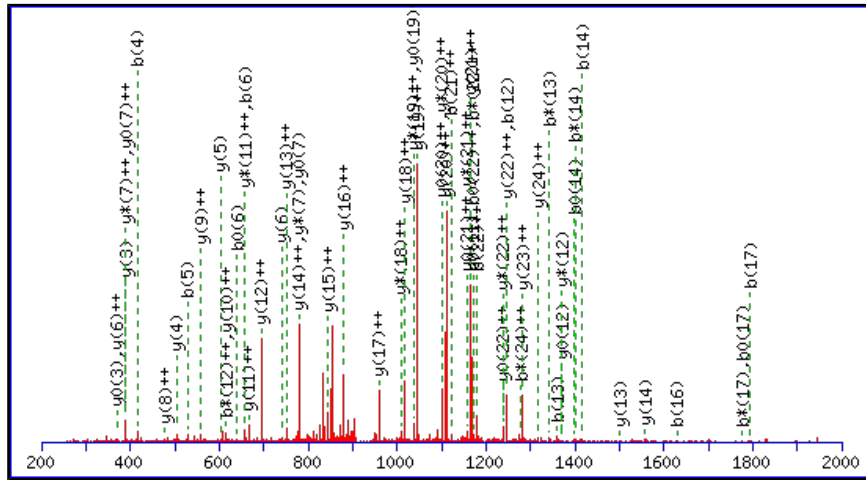

Monoisotopic mass of neutral peptide Mr(calc): 2746.2915

Fixed modifications: Carbamidomethyl (C) (apply to specified residues or termini only)

Variable modifications:

N22 : Deamidated (NQ)

Ions Score: 70 Expect: 2.7e-005

Matches : 62/262 fragment ions using 151 most intense peaks ([help](#))

| #  | b         | b <sup>++</sup> | b <sup>*</sup> | b <sup>*++</sup> | b <sup>0</sup> | b <sup>0++</sup> | Seq. | y         | y <sup>++</sup> | y <sup>*</sup> | y <sup>*++</sup> | y <sup>0</sup> | y <sup>0++</sup> | #  |
|----|-----------|-----------------|----------------|------------------|----------------|------------------|------|-----------|-----------------|----------------|------------------|----------------|------------------|----|
| 1  | 114.0913  | 57.5493         |                |                  |                |                  | L    |           |                 |                |                  |                |                  | 25 |
| 2  | 185.1285  | 93.0679         |                |                  |                |                  | A    | 2634.2147 | 1317.6110       | 2617.1882      | 1309.0977        | 2616.2042      | 1308.6057        | 24 |
| 3  | 256.1656  | 128.5864        |                |                  |                |                  | A    | 2563.1776 | 1282.0925       | 2546.1511      | 1273.5792        | 2545.1671      | 1273.0872        | 23 |
| 4  | 416.1962  | 208.6017        |                |                  |                |                  | C    | 2492.1405 | 1246.5739       | 2475.1140      | 1238.0606        | 2474.1300      | 1237.5686        | 22 |
| 5  | 529.2803  | 265.1438        |                |                  |                |                  | L    | 2332.1099 | 1166.5586       | 2315.0833      | 1158.0453        | 2314.0993      | 1157.5533        | 21 |
| 6  | 658.3229  | 329.6651        |                |                  | 640.3123       | 320.6598         | E    | 2219.0258 | 1110.0165       | 2201.9993      | 1101.5033        | 2201.0152      | 1101.0113        | 20 |
| 7  | 715.3443  | 358.1758        |                |                  | 697.3338       | 349.1705         | G    | 2089.9832 | 1045.4952       | 2072.9567      | 1036.9820        | 2071.9726      | 1036.4900        | 19 |
| 8  | 829.3873  | 415.1973        | 812.3607       | 406.6840         | 811.3767       | 406.1920         | N    | 2032.9617 | 1016.9845       | 2015.9352      | 1008.4712        | 2014.9512      | 1007.9792        | 18 |
| 9  | 989.4179  | 495.2126        | 972.3914       | 486.6993         | 971.4073       | 486.2073         | C    | 1918.9188 | 959.9630        | 1901.8923      | 951.4498         | 1900.9083      | 950.9578         | 17 |
| 10 | 1060.4550 | 530.7312        | 1043.4285      | 522.2179         | 1042.4445      | 521.7259         | A    | 1758.8882 | 879.9477        | 1741.8616      | 871.4344         | 1740.8776      | 870.9424         | 16 |
| 11 | 1189.4976 | 595.2524        | 1172.4711      | 586.7392         | 1171.4871      | 586.2472         | E    | 1687.8511 | 844.4292        | 1670.8245      | 835.9159         | 1669.8405      | 835.4239         | 15 |
| 12 | 1246.5191 | 623.7632        | 1229.4925      | 615.2499         | 1228.5085      | 614.7579         | G    | 1558.8085 | 779.9079        | 1541.7819      | 771.3946         | 1540.7979      | 770.9026         | 14 |
| 13 | 1359.6031 | 680.3052        | 1342.5766      | 671.7919         | 1341.5926      | 671.2999         | L    | 1501.7870 | 751.3971        | 1484.7605      | 742.8839         | 1483.7764      | 742.3919         | 13 |
| 14 | 1416.6246 | 708.8159        | 1399.5981      | 700.3027         | 1398.6140      | 699.8107         | G    | 1388.7029 | 694.8551        | 1371.6764      | 686.3418         | 1370.6924      | 685.8498         | 12 |
| 15 | 1517.6723 | 759.3398        | 1500.6457      | 750.8265         | 1499.6617      | 750.3345         | T    | 1331.6815 | 666.3444        | 1314.6549      | 657.8311         | 1313.6709      | 657.3391         | 11 |
| 16 | 1631.7152 | 816.3612        | 1614.6887      | 807.8480         | 1613.7047      | 807.3560         | N    | 1230.6338 | 615.8205        | 1213.6072      | 607.3073         | 1212.6232      | 606.8153         | 10 |
| 17 | 1794.7785 | 897.8929        | 1777.7520      | 889.3796         | 1776.7680      | 888.8876         | Y    | 1116.5909 | 558.7991        | 1099.5643      | 550.2858         | 1098.5803      | 549.7938         | 9  |
| 18 | 1950.8797 | 975.9435        | 1933.8531      | 967.4302         | 1932.8691      | 966.9382         | R    | 953.5275  | 477.2674        | 936.5010       | 468.7541         | 935.5170       | 468.2621         | 8  |
| 19 | 2007.9011 | 1004.4542       | 1990.8746      | 995.9409         | 1989.8906      | 995.4489         | G    | 797.4264  | 399.2169        | 780.3999       | 390.7036         | 779.4159       | 390.2116         | 7  |
| 20 | 2144.9600 | 1072.9837       | 2127.9335      | 1064.4704        | 2126.9495      | 1063.9784        | H    | 740.4050  | 370.7061        | 723.3784       | 362.1928         | 722.3944       | 361.7008         | 6  |
| 21 | 2244.0284 | 1122.5179       | 2227.0019      | 1114.0046        | 2226.0179      | 1113.5126        | V    | 603.3461  | 302.1767        | 586.3195       | 293.6634         | 585.3355       | 293.1714         | 5  |
| 22 | 2359.0554 | 1180.0313       | 2342.0288      | 1171.5181        | 2341.0448      | 1171.0261        | N    | 504.2776  | 252.6425        | 487.2511       | 244.1292         | 486.2671       | 243.6372         | 4  |
| 23 | 2472.1395 | 1236.5734       | 2455.1129      | 1228.0601        | 2454.1289      | 1227.5681        | I    | 389.2507  | 195.1290        | 372.2241       | 186.6157         | 371.2401       | 186.1237         | 3  |



|    |           |           |           |           |           |           |   |          |          |          |          |          |          |   |
|----|-----------|-----------|-----------|-----------|-----------|-----------|---|----------|----------|----------|----------|----------|----------|---|
| 24 | 2573.1871 | 1287.0972 | 2556.1606 | 1278.5839 | 2555.1766 | 1278.0919 | T | 276.1666 | 138.5870 | 259.1401 | 130.0737 | 258.1561 | 129.5817 | 2 |
| 25 |           |           |           |           |           |           | R | 175.1190 | 88.0631  | 158.0924 | 79.5498  |          |          | 1 |

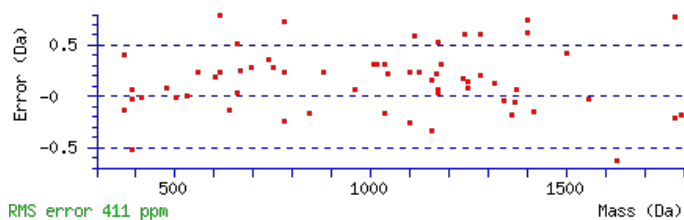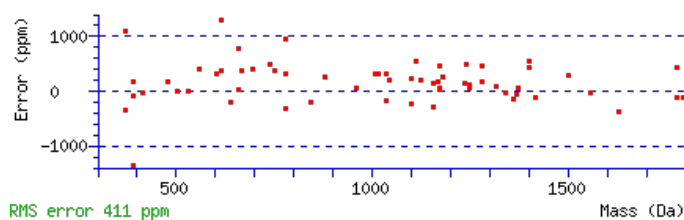

NCBI BLAST search of [LAACLEGNCAEGLGTNYRGHVNITR](#)

(Parameters: blastp, nr protein database, expect=20000, no filter, PAM30)

Other BLAST [web gateways](#)

All matches to this query

| Score | Mr(calc)  | Delta   | Sequence                                    | Site Analysis         |
|-------|-----------|---------|---------------------------------------------|-----------------------|
| 69.7  | 2746.2915 | 0.0069  | <a href="#">LAACLEGNCAEGLGTNYRGHVNITR</a>   | Deamidated N22 93.89% |
| 55.6  | 2746.2915 | 0.0069  | <a href="#">LAACLEGNCAEGLGTNYRGHVNITR</a>   | Deamidated N8 3.68%   |
| 53.8  | 2746.2915 | 0.0069  | <a href="#">LAACLEGNCAEGLGTNYRGHVNITR</a>   | Deamidated N16 2.44%  |
| 45.2  | 2745.3075 | 0.9909  | <a href="#">LAACLEGNCAEGLGTNYRGHVNITR</a>   |                       |
| 7.9   | 2746.2927 | 0.0057  | <a href="#">EKGTNETSGLATSMLTASSSETRASSK</a> |                       |
| 6.8   | 2746.2882 | 0.0103  | <a href="#">MNPPFSGPGREGQIGSEGSGRAENGPK</a> |                       |
| 5.6   | 2746.3032 | -0.0048 | <a href="#">QQNDELTTLADEAQSLKDEIDVLR</a>    |                       |
| 5.6   | 2746.3032 | -0.0048 | <a href="#">QQNDELTTLADEAQSLKDEIDVLR</a>    |                       |
| 5.6   | 2746.3032 | -0.0048 | <a href="#">QQNDELTTLADEAQSLKDEIDVLR</a>    |                       |
| 5.1   | 2746.2980 | 0.0004  | <a href="#">TVTINEAESNDSGLPHLHOPRKGNM</a>   |                       |

Mascot: <http://www.matrixscience.com/>

# MATRIX SCIENCE Mascot Search Results

## Peptide View

MS/MS Fragmentation of **WVLTAAHCLLYPPWDKNFTENDLLVR**

Found in **E9PIT3** in **con\_Xuniprot\_HUMAN3**, E9PIT3\_HUMAN Thrombin light chain OS=Homo sapiens GN=F2 PE=2 SV=1

Match to Query 27356: 3172.594392 from(1058.538740,3+) intensity(30926.3691) rtinseconds(2405) scans(6370) index(16235)

Title: 111019\_Est\_MI\_YP\_G\_05Spectrum5455\_scans\_\_6370

Data file C:\mascot\20140703\_Tmgf\_1D\CSV\_UseAnalysis\MasterCSV\All\_Glyco\mgf\ptm\UC18ERLIC\_PTM\_35D.mgf

Click mouse within plot area to zoom in by factor of two about that point

Or, to Da

Label all possible matches Label matches used for scoring

Show Y-axis

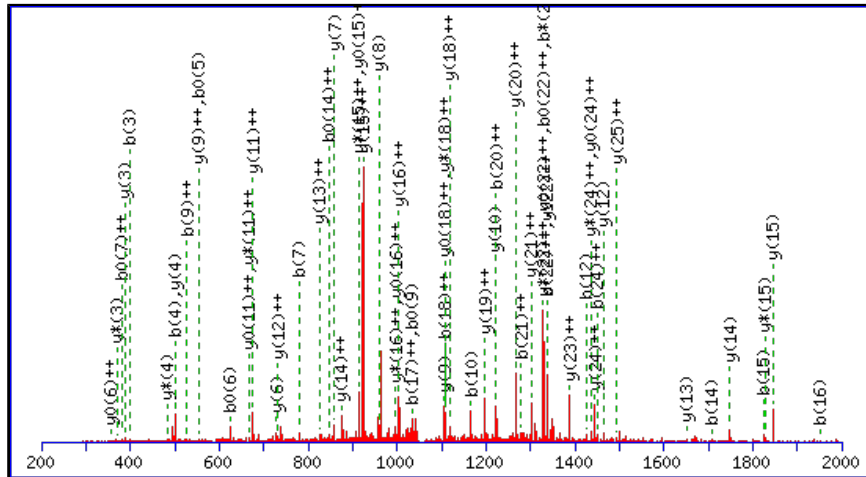

Monoisotopic mass of neutral peptide Mr(calc): 3171.5852

Fixed modifications: Carbamidomethyl (C) (apply to specified residues or termini only)

Variable modifications:

N17 : Deamidated (NQ)

Ions Score: 59 Expect: 0.0003

Matches : 65/256 fragment ions using 136 most intense peaks ([help](#))

| #  | b         | b <sup>++</sup> | b <sup>*</sup> | b <sup>*++</sup> | b <sup>0</sup> | b <sup>0++</sup> | Seq. | y         | y <sup>++</sup> | y <sup>*</sup> | y <sup>*++</sup> | y <sup>0</sup> | y <sup>0++</sup> | #  |
|----|-----------|-----------------|----------------|------------------|----------------|------------------|------|-----------|-----------------|----------------|------------------|----------------|------------------|----|
| 1  | 187.0866  | 94.0469         |                |                  |                |                  | W    |           |                 |                |                  |                |                  | 26 |
| 2  | 286.1550  | 143.5811        |                |                  |                |                  | V    | 2986.5131 | 1493.7602       | 2969.4866      | 1485.2469        | 2968.5026      | 1484.7549        | 25 |
| 3  | 399.2391  | 200.1232        |                |                  |                |                  | L    | 2887.4447 | 1444.2260       | 2870.4182      | 1435.7127        | 2869.4342      | 1435.2207        | 24 |
| 4  | 500.2867  | 250.6470        |                |                  | 482.2762       | 241.6417         | T    | 2774.3607 | 1387.6840       | 2757.3341      | 1379.1707        | 2756.3501      | 1378.6787        | 23 |
| 5  | 571.3239  | 286.1656        |                |                  | 553.3133       | 277.1603         | A    | 2673.3130 | 1337.1601       | 2656.2864      | 1328.6469        | 2655.3024      | 1328.1548        | 22 |
| 6  | 642.3610  | 321.6841        |                |                  | 624.3504       | 312.6788         | A    | 2602.2759 | 1301.6416       | 2585.2493      | 1293.1283        | 2584.2653      | 1292.6363        | 21 |
| 7  | 779.4199  | 390.2136        |                |                  | 761.4093       | 381.2083         | H    | 2531.2388 | 1266.1230       | 2514.2122      | 1257.6097        | 2513.2282      | 1257.1177        | 20 |
| 8  | 939.4505  | 470.2289        |                |                  | 921.4400       | 461.2236         | C    | 2394.1798 | 1197.5936       | 2377.1533      | 1189.0803        | 2376.1693      | 1188.5883        | 19 |
| 9  | 1052.5346 | 526.7709        |                |                  | 1034.5240      | 517.7657         | L    | 2234.1492 | 1117.5782       | 2217.1226      | 1109.0650        | 2216.1386      | 1108.5730        | 18 |
| 10 | 1165.6187 | 583.3130        |                |                  | 1147.6081      | 574.3077         | L    | 2121.0651 | 1061.0362       | 2104.0386      | 1052.5229        | 2103.0546      | 1052.0309        | 17 |
| 11 | 1328.6820 | 664.8446        |                |                  | 1310.6714      | 655.8394         | Y    | 2007.9811 | 1004.4942       | 1990.9545      | 995.9809         | 1989.9705      | 995.4889         | 16 |
| 12 | 1425.7348 | 713.3710        |                |                  | 1407.7242      | 704.3657         | P    | 1844.9177 | 922.9625        | 1827.8912      | 914.4492         | 1826.9072      | 913.9572         | 15 |
| 13 | 1522.7875 | 761.8974        |                |                  | 1504.7770      | 752.8921         | P    | 1747.8650 | 874.4361        | 1730.8384      | 865.9229         | 1729.8544      | 865.4308         | 14 |
| 14 | 1708.8668 | 854.9371        |                |                  | 1690.8563      | 845.9318         | W    | 1650.8122 | 825.9097        | 1633.7857      | 817.3965         | 1632.8016      | 816.9045         | 13 |
| 15 | 1823.8938 | 912.4505        |                |                  | 1805.8832      | 903.4452         | D    | 1464.7329 | 732.8701        | 1447.7063      | 724.3568         | 1446.7223      | 723.8648         | 12 |
| 16 | 1951.9887 | 976.4980        | 1934.9622      | 967.9847         | 1933.9782      | 967.4927         | K    | 1349.7060 | 675.3566        | 1332.6794      | 666.8433         | 1331.6954      | 666.3513         | 11 |
| 17 | 2067.0157 | 1034.0115       | 2049.9891      | 1025.4982        | 2049.0051      | 1025.0062        | N    | 1221.6110 | 611.3091        | 1204.5844      | 602.7959         | 1203.6004      | 602.3039         | 10 |
| 18 | 2214.0841 | 1107.5457       | 2197.0575      | 1099.0324        | 2196.0735      | 1098.5404        | F    | 1106.5840 | 553.7957        | 1089.5575      | 545.2824         | 1088.5735      | 544.7904         | 9  |
| 19 | 2315.1318 | 1158.0695       | 2298.1052      | 1149.5563        | 2297.1212      | 1149.0642        | T    | 959.5156  | 480.2615        | 942.4891       | 471.7482         | 941.5051       | 471.2562         | 8  |
| 20 | 2444.1744 | 1222.5908       | 2427.1478      | 1214.0775        | 2426.1638      | 1213.5855        | E    | 858.4680  | 429.7376        | 841.4414       | 421.2243         | 840.4574       | 420.7323         | 7  |
| 21 | 2558.2173 | 1279.6123       | 2541.1907      | 1271.0990        | 2540.2067      | 1270.6070        | N    | 729.4254  | 365.2163        | 712.3988       | 356.7030         | 711.4148       | 356.2110         | 6  |
| 22 | 2673.2442 | 1337.1258       | 2656.2177      | 1328.6125        | 2655.2337      | 1328.1205        | D    | 615.3824  | 308.1949        | 598.3559       | 299.6816         | 597.3719       | 299.1896         | 5  |
| 23 | 2786.3283 | 1393.6678       | 2769.3018      | 1385.1545        | 2768.3177      | 1384.6625        | L    | 500.3555  | 250.6814        | 483.3289       | 242.1681         |                |                  | 4  |

|    |           |                  |           |           |           |           |   |                 |          |                 |          |  |  |   |
|----|-----------|------------------|-----------|-----------|-----------|-----------|---|-----------------|----------|-----------------|----------|--|--|---|
| 24 | 2899.4124 | <b>1450.2098</b> | 2882.3858 | 1441.6965 | 2881.4018 | 1441.2045 | L | <b>387.2714</b> | 194.1394 | <b>370.2449</b> | 185.6261 |  |  | 3 |
| 25 | 2998.4808 | 1499.7440        | 2981.4542 | 1491.2308 | 2980.4702 | 1490.7387 | V | 274.1874        | 137.5973 | 257.1608        | 129.0840 |  |  | 2 |
| 26 |           |                  |           |           |           |           | R | 175.1190        | 88.0631  | 158.0924        | 79.5498  |  |  | 1 |

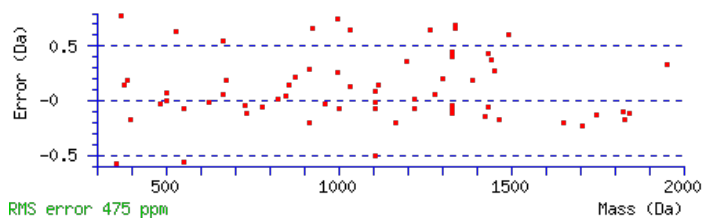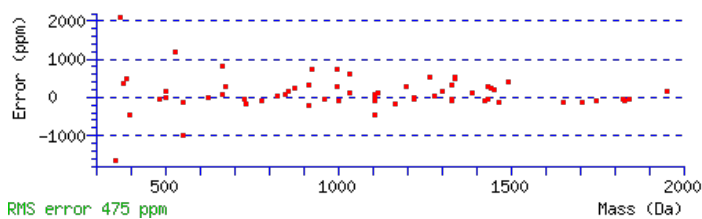

NCBI BLAST search of [WVLTAAHCLLYPPWDKNFTENDLLVR](#)  
 (Parameters: blastp, nr protein database, expect=20000, no filter, PAM30)  
 Other BLAST [web gateways](#)

All matches to this query

| Score | Mr(calc)  | Delta  | Sequence                                        | Site Analysis         |
|-------|-----------|--------|-------------------------------------------------|-----------------------|
| 59.2  | 3171.5852 | 1.0092 | <a href="#">WVLTAAHCLLYPPWDKNFTENDLLVR</a>      | Deamidated N17 85.08% |
| 51.7  | 3171.5852 | 1.0092 | <a href="#">WVLTAAHCLLYPPWDKNFTENDLLVR</a>      | Deamidated N21 14.92% |
| 38.2  | 3170.6012 | 1.9932 | <a href="#">WVLTAAHCLLYPPWDKNFTENDLLVR</a>      |                       |
| 9.4   | 3172.5901 | 0.0043 | <a href="#">SPPLGAPTSHQSAPPPVSPTVPVSSERHAER</a> |                       |
| 6.5   | 3171.6061 | 0.9883 | <a href="#">SPPLGAPTSHQSAPPPVSPTVPVSSERHAER</a> |                       |
| 5.5   | 3172.5856 | 0.0088 | <a href="#">TVTESRPLSVPVKAMLNISESCRSPER</a>     |                       |
| 4.6   | 3171.5917 | 1.0027 | <a href="#">DFLIPIAWYEDRQVPGGYTVINKYQ GK</a>    |                       |
| 4.1   | 3171.6048 | 0.9896 | <a href="#">LLGSNDSPASASQVAGTTDRNQ LLELPIER</a> |                       |
| 4.1   | 3171.6048 | 0.9896 | <a href="#">LLGSNDSPASASQVAGTTDRNQ LLELPIER</a> |                       |
| 4.1   | 3171.6048 | 0.9896 | <a href="#">LLGSNDSPASASQVAGTTDRNQ LLELPIER</a> |                       |

Mascot: <http://www.matrixscience.com/>

# MATRIX SCIENCE Mascot Search Results

## Peptide View

MS/MS Fragmentation of **SEGSSVNLSPPLEQCVPRGQQYQGR**

Found in **C9JV37** in **con\_Xuniprot\_HUMAN3**, C9JV37\_HUMAN Thrombin light chain (Fragment) OS=Homo sapiens GN=F2 PE=2 SV=1

Match to Query 26017: 2888.345502 from(963.789110,3+) intensity(63540.2383) rtinseconds(1167) scans(2747) index(25261)

Title: 111019\_Est\_MI\_YS\_G\_07Spectrum2322\_scans\_\_2747

Data file C:\mascot\20140703\_Tmgf\_1D\CSV\_UseAnalysis\MasterCSV\All\_Glyco\mgf\ptm\UC18ERLIC\_PTM\_35D.mgf

Click mouse within plot area to zoom in by factor of two about that point

Or, to Da

Label all possible matches Label matches used for scoring

Show Y-axis

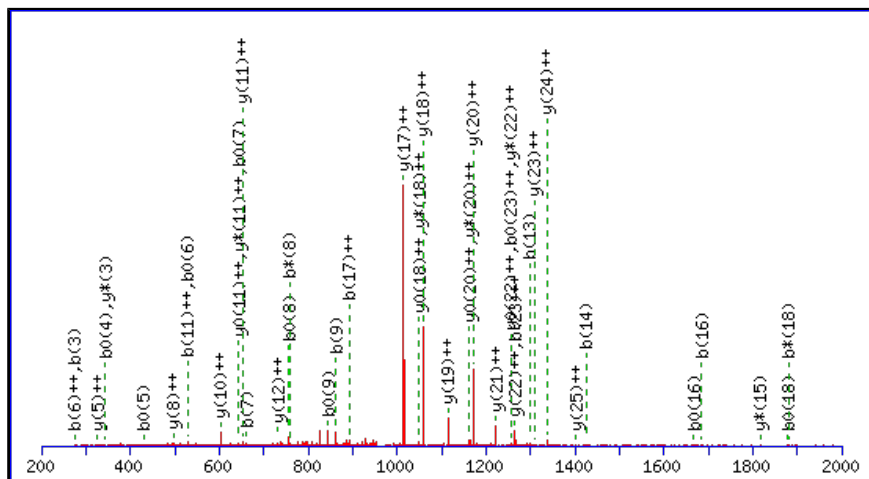

Monoisotopic mass of neutral peptide Mr(calc): 2888.3359

Fixed modifications: Carbamidomethyl (C) (apply to specified residues or termini only)

Variable modifications:

N7 : Deamidated (NQ)

Ions Score: 57 Expect: 0.00044

Matches : 45/272 fragment ions using 84 most intense peaks ([help](#))

| #  | b                | b <sup>++</sup>  | b <sup>*</sup>   | b <sup>*++</sup> | b <sup>0</sup> | b <sup>0++</sup> | Seq. | y         | y <sup>++</sup> | y <sup>*</sup> | y <sup>*++</sup> | y <sup>0</sup> | y <sup>0++</sup> | #  |
|----|------------------|------------------|------------------|------------------|----------------|------------------|------|-----------|-----------------|----------------|------------------|----------------|------------------|----|
| 1  | 88.0393          | 44.5233          |                  |                  | 70.0287        | 35.5180          | S    |           |                 |                |                  |                |                  | 26 |
| 2  | 217.0819         | 109.0446         |                  |                  | 199.0713       | 100.0393         | E    | 2802.3111 | 1401.6592       | 2785.2846      | 1393.1459        | 2784.3006      | 1392.6539        | 25 |
| 3  | <b>274.1034</b>  | 137.5553         |                  |                  | 256.0928       | 128.5500         | G    | 2673.2686 | 1337.1379       | 2656.2420      | 1328.6246        | 2655.2580      | 1328.1326        | 24 |
| 4  | 361.1354         | 181.0713         |                  |                  | 343.1248       | 172.0660         | S    | 2616.2471 | 1308.6272       | 2599.2205      | 1300.1139        | 2598.2365      | 1299.6219        | 23 |
| 5  | 448.1674         | 224.5873         |                  |                  | 430.1569       | 215.5821         | S    | 2529.2151 | 1265.1112       | 2512.1885      | 1256.5979        | 2511.2045      | 1256.1059        | 22 |
| 6  | 547.2358         | <b>274.1216</b>  |                  |                  | 529.2253       | 265.1163         | V    | 2442.1830 | 1221.5952       | 2425.1565      | 1213.0819        | 2424.1725      | 1212.5899        | 21 |
| 7  | <b>662.2628</b>  | 331.6350         | 645.2362         | 323.1218         | 644.2522       | 322.6297         | N    | 2343.1146 | 1172.0609       | 2326.0881      | 1163.5477        | 2325.1041      | 1163.0557        | 20 |
| 8  | 775.3468         | 388.1771         | <b>758.3203</b>  | 379.6638         | 757.3363       | 379.1718         | L    | 2228.0877 | 1114.5475       | 2211.0611      | 1106.0342        | 2210.0771      | 1105.5422        | 19 |
| 9  | <b>862.3789</b>  | 431.6931         | 845.3523         | 423.1798         | 844.3683       | 422.6878         | S    | 2115.0036 | 1058.0054       | 2097.9771      | 1049.4922        | 2096.9931      | 1049.0002        | 18 |
| 10 | 959.4316         | 480.2195         | 942.4051         | 471.7062         | 941.4211       | 471.2142         | P    | 2027.9716 | 1014.4894       | 2010.9450      | 1005.9762        | 2009.9610      | 1005.4841        | 17 |
| 11 | 1056.4844        | <b>528.7458</b>  | 1039.4578        | 520.2326         | 1038.4738      | 519.7406         | P    | 1930.9188 | 965.9630        | 1913.8923      | 957.4498         | 1912.9083      | 956.9578         | 16 |
| 12 | 1169.5685        | 585.2879         | 1152.5419        | 576.7746         | 1151.5579      | 576.2826         | L    | 1833.8661 | 917.4367        | 1816.8395      | 908.9234         | 1815.8555      | 908.4314         | 15 |
| 13 | <b>1298.6111</b> | 649.8092         | 1281.5845        | 641.2959         | 1280.6005      | 640.8039         | E    | 1720.7820 | 860.8946        | 1703.7554      | 852.3814         | 1702.7714      | 851.8894         | 14 |
| 14 | <b>1426.6696</b> | 713.8385         | 1409.6431        | 705.3252         | 1408.6591      | 704.8332         | Q    | 1591.7394 | 796.3733        | 1574.7129      | 787.8601         | 1573.7288      | 787.3681         | 13 |
| 15 | 1586.7003        | 793.8538         | 1569.6737        | 785.3405         | 1568.6897      | 784.8485         | C    | 1463.6808 | 732.3441        | 1446.6543      | 723.8308         | 1445.6703      | 723.3388         | 12 |
| 16 | <b>1685.7687</b> | 843.3880         | 1668.7421        | 834.8747         | 1667.7581      | 834.3827         | V    | 1303.6502 | 652.3287        | 1286.6236      | 643.8155         | 1285.6396      | 643.3234         | 11 |
| 17 | 1782.8215        | <b>891.9144</b>  | 1765.7949        | 883.4011         | 1764.8109      | 882.9091         | P    | 1204.5818 | 602.7945        | 1187.5552      | 594.2812         | 1186.5712      | 593.7892         | 10 |
| 18 | 1897.8484        | 949.4278         | <b>1880.8219</b> | 940.9146         | 1879.8378      | 940.4226         | D    | 1107.5290 | 554.2681        | 1090.5024      | 545.7549         | 1089.5184      | 545.2629         | 9  |
| 19 | 2053.9495        | 1027.4784        | 2036.9230        | 1018.9651        | 2035.9389      | 1018.4731        | R    | 992.5021  | 496.7547        | 975.4755       | 488.2414         |                |                  | 8  |
| 20 | 2110.9710        | 1055.9891        | 2093.9444        | 1047.4759        | 2092.9604      | 1046.9838        | G    | 836.4009  | 418.7041        | 819.3744       | 410.1908         |                |                  | 7  |
| 21 | 2239.0296        | 1120.0184        | 2222.0030        | 1111.5051        | 2221.0190      | 1111.0131        | Q    | 779.3795  | 390.1934        | 762.3529       | 381.6801         |                |                  | 6  |
| 22 | 2367.0881        | 1184.0477        | 2350.0616        | 1175.5344        | 2349.0776      | 1175.0424        | Q    | 651.3209  | 326.1641        | 634.2944       | 317.6508         |                |                  | 5  |
| 23 | 2530.1515        | <b>1265.5794</b> | 2513.1249        | 1257.0661        | 2512.1409      | 1256.5741        | Y    | 523.2623  | 262.1348        | 506.2358       | 253.6215         |                |                  | 4  |

|    |           |           |           |           |           |           |   |          |          |          |          |  |  |   |
|----|-----------|-----------|-----------|-----------|-----------|-----------|---|----------|----------|----------|----------|--|--|---|
| 24 | 2658.2100 | 1329.6087 | 2641.1835 | 1321.0954 | 2640.1995 | 1320.6034 | Q | 360.1990 | 180.6031 | 343.1724 | 172.0899 |  |  | 3 |
| 25 | 2715.2315 | 1358.1194 | 2698.2050 | 1349.6061 | 2697.2209 | 1349.1141 | G | 232.1404 | 116.5738 | 215.1139 | 108.0606 |  |  | 2 |
| 26 |           |           |           |           |           |           | R | 175.1190 | 88.0631  | 158.0924 | 79.5498  |  |  | 1 |

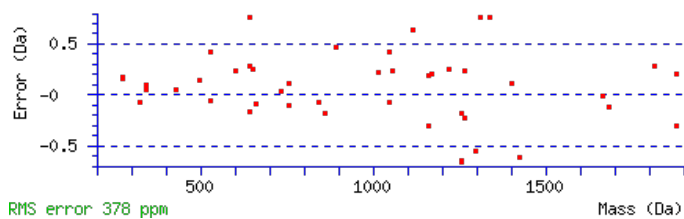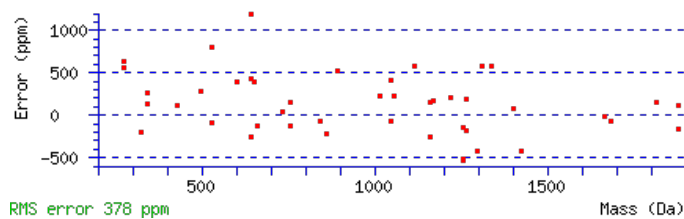

NCBI **BLAST** search of [SEGSSVNLSPPLEQCVPDRGQQYQGR](#)  
 (Parameters: blastp, nr protein database, expect=20000, no filter, PAM30)  
 Other BLAST [web gateways](#)

**All matches to this query**

| Score | Mr(calc)  | Delta   | Sequence                                    | Site Analysis         |
|-------|-----------|---------|---------------------------------------------|-----------------------|
| 57.4  | 2888.3359 | 0.0096  | <a href="#">SEGSSVNLSPPLEQCVPDRGQQYQGR</a>  | Deamidated N7 34.44%  |
| 55.9  | 2888.3359 | 0.0096  | <a href="#">SEGSSVNLSPPLEQCVPDRGQQYQGR</a>  | Deamidated Q14 24.44% |
| 53.4  | 2888.3359 | 0.0096  | <a href="#">SEGSSVNLSPPLEQCVPDRGQQYQGR</a>  | Deamidated Q22 13.74% |
| 53.4  | 2888.3359 | 0.0096  | <a href="#">SEGSSVNLSPPLEQCVPDRGQQYQGR</a>  | Deamidated Q21 13.74% |
| 53.3  | 2888.3359 | 0.0096  | <a href="#">SEGSSVNLSPPLEQCVPDRGQQYQGR</a>  | Deamidated Q24 13.65% |
| 39.8  | 2887.3519 | 0.9936  | <a href="#">SEGSSVNLSPPLEQCVPDRGQQYQGR</a>  |                       |
| 5.9   | 2888.3509 | -0.0054 | <a href="#">ESHTHRDRPSQQQLRNQNVSSER</a>     |                       |
| 5.5   | 2886.3310 | 2.0145  | <a href="#">RLDCAAMTNRADEMQQTLEAVSLAR</a>   |                       |
| 4.8   | 2887.3289 | 1.0166  | <a href="#">LTGAIANVDMESMMVSVDKNNVDFAAK</a> |                       |
| 4.6   | 2888.3509 | -0.0054 | <a href="#">ESHTHRDRPSQQQLRNQNVSSER</a>     |                       |

Mascot: <http://www.matrixscience.com/>

# MATRIX SCIENCE Mascot Search Results

## Peptide View

MS/MS Fragmentation of **SRYPHKPEINSTTHPGADLQENFCR**

Found in **C9JV37** in **con\_Xuniprot\_HUMAN3**, C9JV37\_HUMAN Thrombin light chain (Fragment) OS=Homo sapiens GN=F2 PE=2 SV=1

Match to Query 26787: 2954.379176 from(739.602070,4+) intensity(25717.6152) rtinseconds(797) scans(1664) index(8206)

Title: 111019\_Est\_ISCardio\_NMI\_YS\_G\_3Spectrum1373\_scans\_\_1664

Data file C:\mascot\20140703\_Tmgf\_1D\CSV\_UseAnalysis\MasterCSV\All\_Glyco\mgf\ptm\UC18ERLIC\_PTM\_35D.mgf

Click mouse within plot area to zoom in by factor of two about that point

Or, to Da

Label all possible matches Label matches used for scoring

Show Y-axis

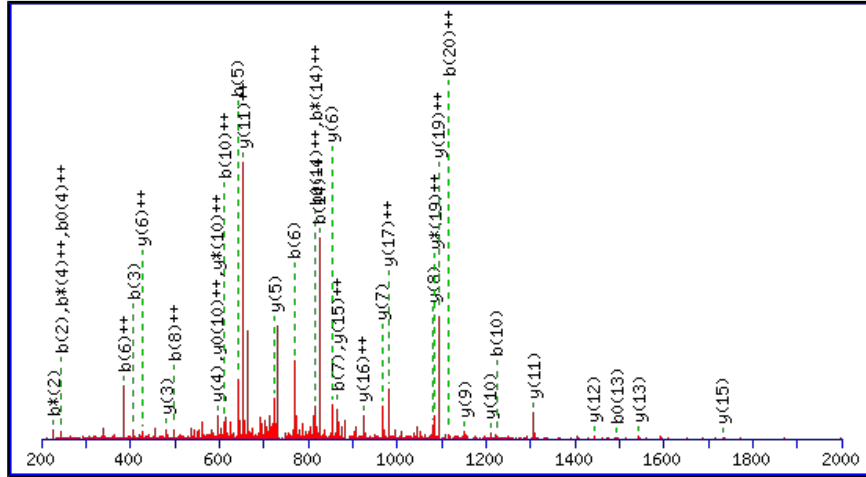

Monoisotopic mass of neutral peptide Mr(calc): 2954.3729

Fixed modifications: Carbamidomethyl (C) (apply to specified residues or termini only)

Variable modifications:

N10 : Deamidated (NQ)

Ions Score: 50 Expect: 0.0024

Matches : 38/278 fragment ions using 80 most intense peaks ([help](#))

| #  | b                | b <sup>++</sup>  | b <sup>*</sup>  | b <sup>*++</sup> | b <sup>0</sup>   | b <sup>0++</sup> | Seq. | y                | y <sup>++</sup>  | y <sup>*</sup> | y <sup>*++</sup> | y <sup>0</sup> | y <sup>0++</sup> | #  |
|----|------------------|------------------|-----------------|------------------|------------------|------------------|------|------------------|------------------|----------------|------------------|----------------|------------------|----|
| 1  | 88.0393          | 44.5233          |                 |                  | 70.0287          | 35.5180          | S    |                  |                  |                |                  |                |                  | 25 |
| 2  | <b>244.1404</b>  | 122.5738         | <b>227.1139</b> | 114.0606         | 226.1298         | 113.5686         | R    | 2868.3482        | 1434.6777        | 2851.3217      | 1426.1645        | 2850.3376      | 1425.6725        | 24 |
| 3  | <b>407.2037</b>  | 204.1055         | 390.1772        | 195.5922         | 389.1932         | 195.1002         | Y    | 2712.2471        | 1356.6272        | 2695.2205      | 1348.1139        | 2694.2365      | 1347.6219        | 23 |
| 4  | 504.2565         | 252.6319         | 487.2300        | <b>244.1186</b>  | 486.2459         | <b>243.6266</b>  | P    | 2549.1838        | 1275.0955        | 2532.1572      | 1266.5822        | 2531.1732      | 1266.0902        | 22 |
| 5  | <b>641.3154</b>  | 321.1613         | 624.2889        | 312.6481         | 623.3049         | 312.1561         | H    | 2452.1310        | 1226.5691        | 2435.1044      | 1218.0559        | 2434.1204      | 1217.5639        | 21 |
| 6  | <b>769.4104</b>  | <b>385.2088</b>  | 752.3838        | 376.6956         | 751.3998         | 376.2035         | K    | 2315.0721        | 1158.0397        | 2298.0455      | 1149.5264        | 2297.0615      | 1149.0344        | 20 |
| 7  | <b>866.4631</b>  | 433.7352         | 849.4366        | 425.2219         | 848.4526         | 424.7299         | P    | 2186.9771        | <b>1093.9922</b> | 2169.9506      | <b>1085.4789</b> | 2168.9666      | 1084.9869        | 19 |
| 8  | 995.5057         | <b>498.2565</b>  | 978.4792        | 489.7432         | 977.4952         | 489.2512         | E    | 2089.9244        | 1045.4658        | 2072.8978      | 1036.9525        | 2071.9138      | 1036.4605        | 18 |
| 9  | 1108.5898        | 554.7985         | 1091.5633       | 546.2853         | 1090.5792        | 545.7933         | I    | 1960.8818        | <b>980.9445</b>  | 1943.8552      | 972.4312         | 1942.8712      | 971.9392         | 17 |
| 10 | <b>1223.6167</b> | <b>612.3120</b>  | 1206.5902       | 603.7987         | 1205.6062        | 603.3067         | N    | 1847.7977        | <b>924.4025</b>  | 1830.7712      | 915.8892         | 1829.7871      | 915.3972         | 16 |
| 11 | 1310.6488        | 655.8280         | 1293.6222       | 647.3148         | 1292.6382        | 646.8227         | S    | <b>1732.7708</b> | <b>866.8890</b>  | 1715.7442      | 858.3757         | 1714.7602      | 857.8837         | 15 |
| 12 | 1411.6965        | 706.3519         | 1394.6699       | 697.8386         | 1393.6859        | 697.3466         | T    | 1645.7387        | 823.3730         | 1628.7122      | 814.8597         | 1627.7282      | 814.3677         | 14 |
| 13 | 1512.7441        | 756.8757         | 1495.7176       | 748.3624         | <b>1494.7336</b> | 747.8704         | T    | <b>1544.6911</b> | 772.8492         | 1527.6645      | 764.3359         | 1526.6805      | 763.8439         | 13 |
| 14 | 1649.8030        | <b>825.4052</b>  | 1632.7765       | <b>816.8919</b>  | 1631.7925        | <b>816.3999</b>  | H    | <b>1443.6434</b> | 722.3253         | 1426.6168      | 713.8121         | 1425.6328      | 713.3200         | 12 |
| 15 | 1746.8558        | 873.9315         | 1729.8293       | 865.4183         | 1728.8452        | 864.9263         | P    | <b>1306.5845</b> | <b>653.7959</b>  | 1289.5579      | 645.2826         | 1288.5739      | 644.7906         | 11 |
| 16 | 1803.8773        | 902.4423         | 1786.8507       | 893.9290         | 1785.8667        | 893.4370         | G    | <b>1209.5317</b> | 605.2695         | 1192.5051      | <b>596.7562</b>  | 1191.5211      | <b>596.2642</b>  | 10 |
| 17 | 1874.9144        | 937.9608         | 1857.8878       | 929.4476         | 1856.9038        | 928.9555         | A    | <b>1152.5102</b> | 576.7588         | 1135.4837      | 568.2455         | 1134.4997      | 567.7535         | 9  |
| 18 | 1989.9413        | 995.4743         | 1972.9148       | 986.9610         | 1971.9308        | 986.4690         | D    | <b>1081.4731</b> | 541.2402         | 1064.4466      | 532.7269         | 1063.4626      | 532.2349         | 8  |
| 19 | 2103.0254        | 1052.0163        | 2085.9988       | 1043.5031        | 2085.0148        | 1043.0111        | L    | <b>966.4462</b>  | 483.7267         | 949.4196       | 475.2135         | 948.4356       | 474.7214         | 7  |
| 20 | 2231.0840        | <b>1116.0456</b> | 2214.0574       | 1107.5323        | 2213.0734        | 1107.0403        | Q    | <b>853.3621</b>  | <b>427.1847</b>  | 836.3356       | 418.6714         | 835.3515       | 418.1794         | 6  |
| 21 | 2360.1266        | 1180.5669        | 2343.1000       | 1172.0536        | 2342.1160        | 1171.5616        | E    | <b>725.3035</b>  | 363.1554         | 708.2770       | 354.6421         | 707.2930       | 354.1501         | 5  |
| 22 | 2474.1695        | 1237.5884        | 2457.1429       | 1229.0751        | 2456.1589        | 1228.5831        | N    | <b>596.2609</b>  | 298.6341         | 579.2344       | 290.1208         |                |                  | 4  |
| 23 | 2621.2379        | 1311.1226        | 2604.2114       | 1302.6093        | 2603.2273        | 1302.1173        | F    | <b>482.2180</b>  | 241.6126         | 465.1915       | 233.0994         |                |                  | 3  |

|    |           |           |           |           |           |           |   |          |          |          |          |  |  |   |
|----|-----------|-----------|-----------|-----------|-----------|-----------|---|----------|----------|----------|----------|--|--|---|
| 24 | 2781.2686 | 1391.1379 | 2764.2420 | 1382.6246 | 2763.2580 | 1382.1326 | C | 335.1496 | 168.0784 | 318.1231 | 159.5652 |  |  | 2 |
| 25 |           |           |           |           |           |           | R | 175.1190 | 88.0631  | 158.0924 | 79.5498  |  |  | 1 |

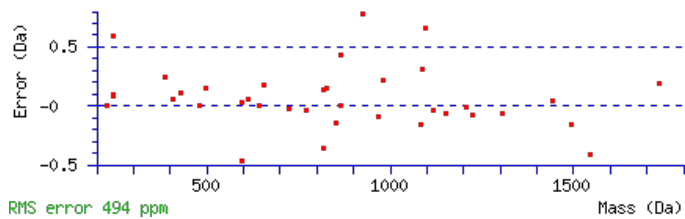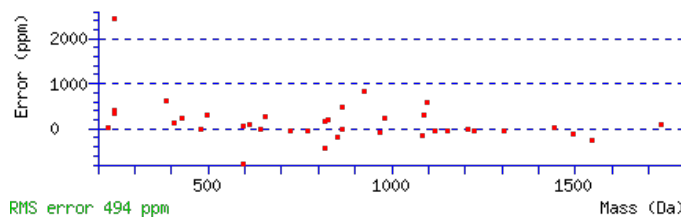

NCBI BLAST search of [SRYPHKPEINSTTHPGADLQENFCR](#)  
 (Parameters: blastp, nr protein database, expect=20000, no filter, PAM30)  
 Other BLAST [web gateways](#)

All matches to this query

| Score | Mr(calc)  | Delta   | Sequence                                     | Site Analysis         |
|-------|-----------|---------|----------------------------------------------|-----------------------|
| 49.9  | 2954.3729 | 0.0063  | <a href="#">SRYPHKPEINSTTHPGADLQENFCR</a>    | Deamidated N10 85.74% |
| 47.7  | 2953.3889 | 0.9903  | <a href="#">SRYPHKPEINSTTHPGADLQENFCR</a>    |                       |
| 39.6  | 2954.3729 | 0.0063  | <a href="#">SRYPHKPEINSTTHPGADLQENFCR</a>    | Deamidated Q20 8.04%  |
| 38.5  | 2954.3729 | 0.0063  | <a href="#">SRYPHKPEINSTTHPGADLQENFCR</a>    | Deamidated N22 6.23%  |
| 4.9   | 2953.3646 | 1.0145  | <a href="#">FDNMLLIDMLTSASIMNGDATFIAATK</a>  |                       |
| 3.9   | 2952.3806 | 1.9985  | <a href="#">FDNMLLIDMLTSASIMNGDATFIAATK</a>  |                       |
| 3.3   | 2952.3806 | 1.9985  | <a href="#">FDNMLLIDMLTSASIMNGDATFIAATK</a>  |                       |
| 2.4   | 2954.3815 | -0.0023 | <a href="#">QDGAMKEQGTELLDALDQLAREYQSK</a>   |                       |
| 2.4   | 2953.3770 | 1.0021  | <a href="#">EPRGPTSPASGGCNGENAPCLTLSLQQR</a> |                       |
| 2.1   | 2954.3815 | -0.0023 | <a href="#">QDGAMKEQGTELLDALDQLAREYQSK</a>   |                       |

Mascot: <http://www.matrixscience.com/>



# MATRIX SCIENCE Mascot Search Results

## Peptide View

MS/MS Fragmentation of **SRYPHKPEINSTTHPGADLQENFCR**

Found in **C9JV37** in **con\_Xuniprot\_HUMAN3**, C9JV37\_HUMAN Thrombin light chain (Fragment) OS=Homo sapiens GN=F2 PE=2 SV=1

Match to Query 26788: 2954.384936 from(739.603510,4+) intensity(5417.9082) rtinseconds(734) scans(1452) index(8762)

Title: 111019\_Est\_ISCardio\_NMI\_YS\_G\_4Spectrum1172\_scans\_\_1452

Data file C:\mascot\20140703\_Tmgf\_1D\CSV\_UseAnalysis\MasterCSV\All\_Glyco\mgf\ptm\UC18ERLIC\_PTM\_35D.mgf

Click mouse within plot area to zoom in by factor of two about that point

Or, to Da

Label all possible matches Label matches used for scoring

Show Y-axis

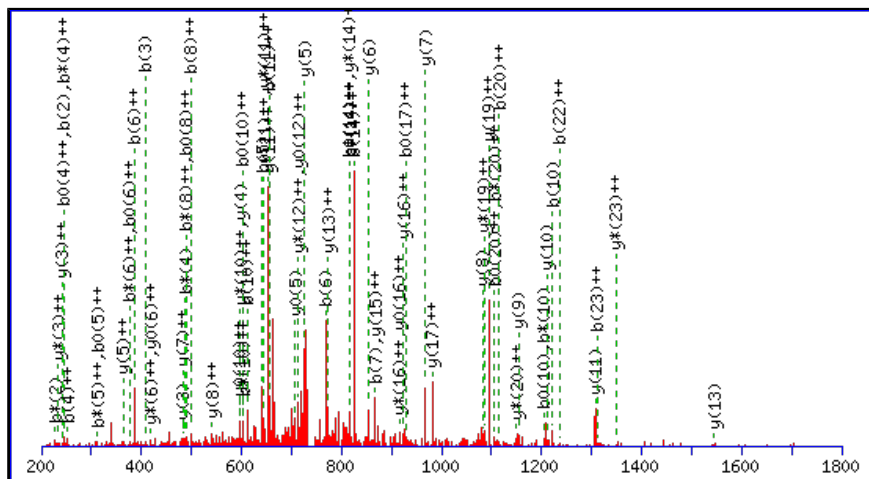

Monoisotopic mass of neutral peptide Mr(calc): 2954.3729

Fixed modifications: Carbamidomethyl (C) (apply to specified residues or termini only)

Variable modifications:

N22 : Deamidated (NQ)

Ions Score: 42 Expect: 0.016

Matches : 70/278 fragment ions using 133 most intense peaks [\(help\)](#)

| #  | b                | b <sup>++</sup>  | b <sup>*</sup>   | b <sup>*++</sup> | b <sup>0</sup>   | b <sup>0++</sup> | Seq. | y                | y <sup>++</sup>  | y <sup>*</sup> | y <sup>*++</sup> | y <sup>0</sup>  | y <sup>0++</sup> | #  |
|----|------------------|------------------|------------------|------------------|------------------|------------------|------|------------------|------------------|----------------|------------------|-----------------|------------------|----|
| 1  | 88.0393          | 44.5233          |                  |                  | 70.0287          | 35.5180          | S    |                  |                  |                |                  |                 |                  | 25 |
| 2  | <b>244.1404</b>  | 122.5738         | <b>227.1139</b>  | 114.0606         | 226.1298         | 113.5686         | R    | 2868.3482        | 1434.6777        | 2851.3217      | 1426.1645        | 2850.3376       | 1425.6725        | 24 |
| 3  | <b>407.2037</b>  | 204.1055         | 390.1772         | 195.5922         | 389.1932         | 195.1002         | Y    | 2712.2471        | 1356.6272        | 2695.2205      | <b>1348.1139</b> | 2694.2365       | 1347.6219        | 23 |
| 4  | 504.2565         | <b>252.6319</b>  | <b>487.2300</b>  | <b>244.1186</b>  | 486.2459         | <b>243.6266</b>  | P    | 2549.1838        | 1275.0955        | 2532.1572      | 1266.5822        | 2531.1732       | 1266.0902        | 22 |
| 5  | <b>641.3154</b>  | 321.1613         | 624.2889         | <b>312.6481</b>  | 623.3049         | <b>312.1561</b>  | H    | 2452.1310        | 1226.5691        | 2435.1044      | 1218.0559        | 2434.1204       | 1217.5639        | 21 |
| 6  | <b>769.4104</b>  | <b>385.2088</b>  | 752.3838         | <b>376.6956</b>  | 751.3998         | <b>376.2035</b>  | K    | 2315.0721        | 1158.0397        | 2298.0455      | <b>1149.5264</b> | 2297.0615       | 1149.0344        | 20 |
| 7  | <b>866.4631</b>  | 433.7352         | 849.4366         | 425.2219         | 848.4526         | 424.7299         | P    | 2186.9771        | <b>1093.9922</b> | 2169.9506      | <b>1085.4789</b> | 2168.9666       | 1084.9869        | 19 |
| 8  | 995.5057         | <b>498.2565</b>  | 978.4792         | <b>489.7432</b>  | 977.4952         | <b>489.2512</b>  | E    | 2089.9244        | 1045.4658        | 2072.8978      | 1036.9525        | 2071.9138       | 1036.4605        | 18 |
| 9  | 1108.5898        | 554.7985         | 1091.5633        | 546.2853         | 1090.5792        | 545.7933         | I    | 1960.8818        | <b>980.9445</b>  | 1943.8552      | 972.4312         | 1942.8712       | 971.9392         | 17 |
| 10 | <b>1222.6327</b> | <b>611.8200</b>  | <b>1205.6062</b> | <b>603.3067</b>  | <b>1204.6222</b> | <b>602.8147</b>  | N    | 1847.7977        | <b>924.4025</b>  | 1830.7712      | <b>915.8892</b>  | 1829.7871       | <b>915.3972</b>  | 16 |
| 11 | 1309.6648        | <b>655.3360</b>  | 1292.6382        | 646.8227         | 1291.6542        | 646.3307         | S    | 1733.7548        | <b>867.3810</b>  | 1716.7282      | 858.8678         | 1715.7442       | 858.3757         | 15 |
| 12 | 1410.7124        | 705.8599         | 1393.6859        | 697.3466         | 1392.7019        | 696.8546         | T    | 1646.7227        | 823.8650         | 1629.6962      | <b>815.3517</b>  | 1628.7122       | 814.8597         | 14 |
| 13 | 1511.7601        | 756.3837         | 1494.7336        | 747.8704         | 1493.7496        | 747.3784         | T    | <b>1545.6751</b> | <b>773.3412</b>  | 1528.6485      | 764.8279         | 1527.6645       | 764.3359         | 13 |
| 14 | 1648.8190        | <b>824.9132</b>  | 1631.7925        | <b>816.3999</b>  | 1630.8085        | <b>815.9079</b>  | H    | 1444.6274        | 722.8173         | 1427.6008      | <b>714.3041</b>  | 1426.6168       | <b>713.8121</b>  | 12 |
| 15 | 1745.8718        | 873.4395         | 1728.8452        | 864.9263         | 1727.8612        | 864.4343         | P    | <b>1307.5685</b> | <b>654.2879</b>  | 1290.5419      | <b>645.7746</b>  | 1289.5579       | <b>645.2826</b>  | 11 |
| 16 | 1802.8933        | 901.9503         | 1785.8667        | 893.4370         | 1784.8827        | 892.9450         | G    | <b>1210.5157</b> | 605.7615         | 1193.4892      | <b>597.2482</b>  | 1192.5051       | <b>596.7562</b>  | 10 |
| 17 | 1873.9304        | 937.4688         | 1856.9038        | 928.9555         | 1855.9198        | <b>928.4635</b>  | A    | <b>1153.4943</b> | 577.2508         | 1136.4677      | 568.7375         | 1135.4837       | 568.2455         | 9  |
| 18 | 1988.9573        | 994.9823         | 1971.9308        | 986.4690         | 1970.9467        | 985.9770         | D    | <b>1082.4571</b> | <b>541.7322</b>  | 1065.4306      | 533.2189         | 1064.4466       | 532.7269         | 8  |
| 19 | 2102.0414        | 1051.5243        | 2085.0148        | 1043.0111        | 2084.0308        | 1042.5190        | L    | <b>967.4302</b>  | <b>484.2187</b>  | 950.4036       | 475.7055         | 949.4196        | 475.2135         | 7  |
| 20 | 2230.1000        | <b>1115.5536</b> | 2213.0734        | <b>1107.0403</b> | 2212.0894        | <b>1106.5483</b> | Q    | <b>854.3461</b>  | 427.6767         | 837.3196       | <b>419.1634</b>  | 836.3356        | <b>418.6714</b>  | 6  |
| 21 | 2359.1425        | 1180.0749        | 2342.1160        | 1171.5616        | 2341.1320        | 1171.0696        | E    | <b>726.2876</b>  | <b>363.6474</b>  | 709.2610       | 355.1341         | <b>708.2770</b> | 354.6421         | 5  |
| 22 | 2474.1695        | <b>1237.5884</b> | 2457.1429        | 1229.0751        | 2456.1589        | 1228.5831        | N    | <b>597.2450</b>  | 299.1261         | 580.2184       | 290.6128         |                 |                  | 4  |
| 23 | 2621.2379        | <b>1311.1226</b> | 2604.2114        | 1302.6093        | 2603.2273        | 1302.1173        | F    | <b>482.2180</b>  | <b>241.6126</b>  | 465.1915       | <b>233.0994</b>  |                 |                  | 3  |

|    |           |           |           |           |           |           |   |          |          |          |          |  |  |   |
|----|-----------|-----------|-----------|-----------|-----------|-----------|---|----------|----------|----------|----------|--|--|---|
| 24 | 2781.2686 | 1391.1379 | 2764.2420 | 1382.6246 | 2763.2580 | 1382.1326 | C | 335.1496 | 168.0784 | 318.1231 | 159.5652 |  |  | 2 |
| 25 |           |           |           |           |           |           | R | 175.1190 | 88.0631  | 158.0924 | 79.5498  |  |  | 1 |

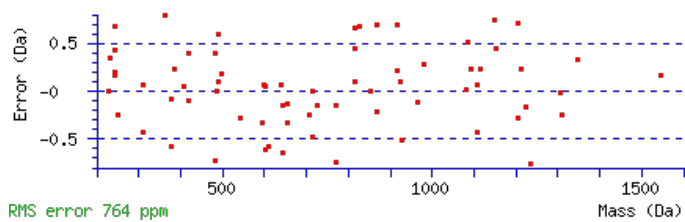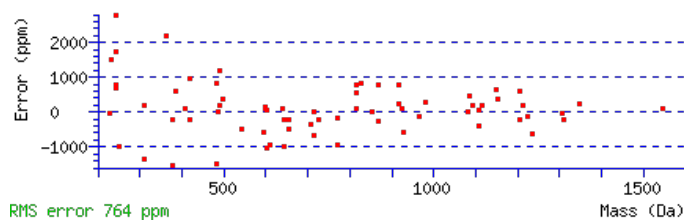

NCBI BLAST search of [SRYPHKPEINSTTHPGADLQENFCR](#)  
 (Parameters: blastp, nr protein database, expect=20000, no filter, PAM30)  
 Other BLAST [web gateways](#)

All matches to this query

| Score | Mr(calc)  | Delta   | Sequence                                    | Site Analysis         |
|-------|-----------|---------|---------------------------------------------|-----------------------|
| 41.6  | 2954.3729 | 0.0120  | <a href="#">SRYPHKPEINSTTHPGADLQENFCR</a>   | Deamidated N22 34.77% |
| 41.4  | 2954.3729 | 0.0120  | <a href="#">SRYPHKPEINSTTHPGADLQENFCR</a>   | Deamidated N10 33.51% |
| 41.2  | 2954.3729 | 0.0120  | <a href="#">SRYPHKPEINSTTHPGADLQENFCR</a>   | Deamidated Q20 31.71% |
| 40.6  | 2953.3889 | 0.9960  | <a href="#">SRYPHKPEINSTTHPGADLQENFCR</a>   |                       |
| 25.4  | 2952.3806 | 2.0043  | <a href="#">FDNMLLIDMLTSASIMNGDATFIAATK</a> |                       |
| 16.5  | 2952.3806 | 2.0043  | <a href="#">FDNMLLIDMLTSASIMNGDATFIAATK</a> |                       |
| 10.2  | 2954.3970 | -0.0121 | <a href="#">DQPLIMGCDRAVSVATLMSDGTVMVTR</a> |                       |
| 8.6   | 2954.3970 | -0.0121 | <a href="#">DQPLIMGCDRAVSVATLMSDGTVMVTR</a> |                       |
| 6.3   | 2954.3869 | -0.0019 | <a href="#">GSVALIIHNVTAEDNGIYQCYFQEGR</a>  |                       |
| 6.0   | 2952.3667 | 2.0182  | <a href="#">NVLCGNIPPDFARMTAEMASDELK</a>    |                       |

Mascot: <http://www.matrixscience.com/>

# MATRIX SCIENCE Mascot Search Results

## Peptide View

MS/MS Fragmentation of **VEEDTKVNSTVIPETQLQAEDR**

Found in **E9PPW2** in **con\_Xuniprot\_HUMAN3**, E9PPW2\_HUMAN Cadherin-related family member 5 (Fragment) OS=Homo sapiens  
GN=CDHR5 PE=2 SV=1

Match to Query 21587: 2501.220852 from(834.747560,3+) intensity(0.0000) rtinseconds(1013) scans(2319) index(10831)

Title: 111019\_Est\_ISCardio\_NMI\_YS\_G\_7Spectrum1952\_scans\_2319

Data file C:\mascot\20140703\_Tmgf\_1D\CSV\_UseAnalysis\MasterCSV\All\_Glyco\mgf\ptm\UC18ERLIC\_PTM\_35D.mgf

Click mouse within plot area to zoom in by factor of two about that point

Or, to Da

Label all possible matches Label matches used for scoring

Show Y-axis

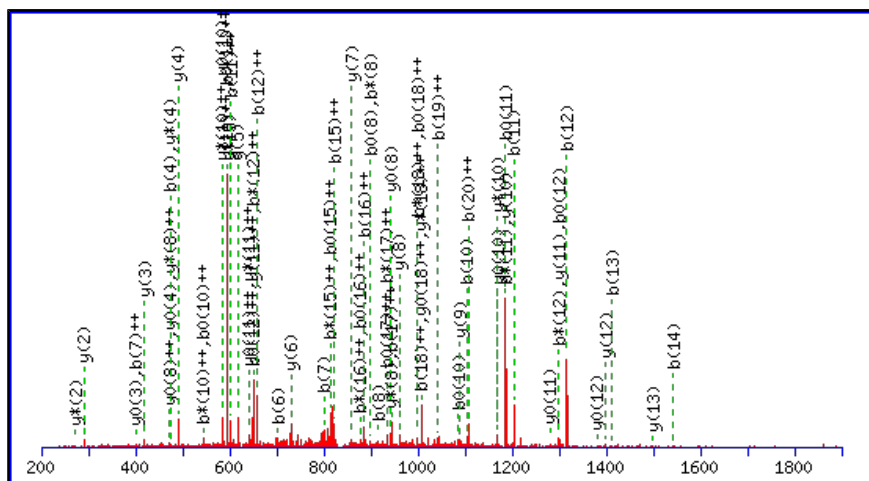

Monoisotopic mass of neutral peptide Mr(calc): 2501.2133

Fixed modifications: Carbamidomethyl (C) (apply to specified residues or termini only)

Variable modifications:

N8 : Deamidated (NQ)

Ions Score: 49 Expect: 0.0037

Matches : 72/238 fragment ions using 132 most intense peaks ([help](#))

| #  | b                | b <sup>++</sup>  | b <sup>*</sup>   | b <sup>*++</sup> | b <sup>0</sup>   | b <sup>0++</sup> | Seq. | y                | y <sup>++</sup> | y <sup>*</sup>   | y <sup>*++</sup> | y <sup>0</sup>   | y <sup>0++</sup> | #  |
|----|------------------|------------------|------------------|------------------|------------------|------------------|------|------------------|-----------------|------------------|------------------|------------------|------------------|----|
| 1  | 100.0757         | 50.5415          |                  |                  |                  |                  | V    |                  |                 |                  |                  |                  |                  | 22 |
| 2  | 229.1183         | 115.0628         |                  |                  | 211.1077         | 106.0575         | E    | 2403.1522        | 1202.0797       | 2386.1256        | 1193.5664        | 2385.1416        | 1193.0744        | 21 |
| 3  | 358.1609         | 179.5841         |                  |                  | 340.1503         | 170.5788         | E    | 2274.1096        | 1137.5584       | 2257.0830        | 1129.0452        | 2256.0990        | 1128.5531        | 20 |
| 4  | <b>473.1878</b>  | 237.0975         |                  |                  | 455.1773         | 228.0923         | D    | 2145.0670        | 1073.0371       | 2128.0404        | 1064.5239        | 2127.0564        | 1064.0318        | 19 |
| 5  | 574.2355         | 287.6214         |                  |                  | 556.2249         | 278.6161         | T    | 2030.0400        | 1015.5237       | 2013.0135        | <b>1007.0104</b> | 2012.0295        | <b>1006.5184</b> | 18 |
| 6  | <b>702.3305</b>  | 351.6689         | 685.3039         | 343.1556         | 684.3199         | 342.6636         | K    | 1928.9924        | 964.9998        | 1911.9658        | 956.4865         | 1910.9818        | 955.9945         | 17 |
| 7  | <b>801.3989</b>  | <b>401.2031</b>  | 784.3723         | 392.6898         | 783.3883         | 392.1978         | V    | 1800.8974        | 900.9523        | 1783.8709        | 892.4391         | 1782.8868        | 891.9471         | 16 |
| 8  | <b>916.4258</b>  | 458.7165         | <b>899.3993</b>  | 450.2033         | <b>898.4153</b>  | 449.7113         | N    | 1701.8290        | 851.4181        | 1684.8024        | 842.9049         | 1683.8184        | 842.4128         | 15 |
| 9  | 1003.4578        | 502.2326         | 986.4313         | 493.7193         | 985.4473         | 493.2273         | S    | 1586.8020        | 793.9047        | 1569.7755        | 785.3914         | 1568.7915        | 784.8994         | 14 |
| 10 | <b>1104.5055</b> | 552.7564         | 1087.4790        | <b>544.2431</b>  | <b>1086.4950</b> | <b>543.7511</b>  | T    | <b>1499.7700</b> | 750.3886        | 1482.7435        | 741.8754         | 1481.7594        | 741.3834         | 13 |
| 11 | <b>1203.5739</b> | <b>602.2906</b>  | <b>1186.5474</b> | <b>593.7773</b>  | <b>1185.5634</b> | <b>593.2853</b>  | V    | <b>1398.7223</b> | 699.8648        | 1381.6958        | 691.3515         | <b>1380.7118</b> | 690.8595         | 12 |
| 12 | <b>1316.6580</b> | <b>658.8326</b>  | <b>1299.6315</b> | <b>650.3194</b>  | <b>1298.6474</b> | <b>649.8274</b>  | I    | <b>1299.6539</b> | <b>650.3306</b> | 1282.6274        | <b>641.8173</b>  | <b>1281.6434</b> | <b>641.3253</b>  | 11 |
| 13 | <b>1413.7108</b> | 707.3590         | 1396.6842        | 698.8457         | 1395.7002        | 698.3537         | P    | <b>1186.5699</b> | <b>593.7886</b> | <b>1169.5433</b> | <b>585.2753</b>  | <b>1168.5593</b> | <b>584.7833</b>  | 10 |
| 14 | <b>1542.7534</b> | 771.8803         | 1525.7268        | 763.3670         | 1524.7428        | 762.8750         | E    | <b>1089.5171</b> | 545.2622        | 1072.4905        | 536.7489         | 1071.5065        | 536.2569         | 9  |
| 15 | 1643.8010        | <b>822.4042</b>  | 1626.7745        | <b>813.8909</b>  | 1625.7905        | <b>813.3989</b>  | T    | <b>960.4745</b>  | 480.7409        | <b>943.4480</b>  | <b>472.2276</b>  | <b>942.4639</b>  | <b>471.7356</b>  | 8  |
| 16 | 1771.8596        | <b>886.4334</b>  | 1754.8331        | <b>877.9202</b>  | 1753.8491        | <b>877.4282</b>  | Q    | <b>859.4268</b>  | 430.2170        | 842.4003         | 421.7038         | 841.4163         | 421.2118         | 7  |
| 17 | 1884.9437        | <b>942.9755</b>  | 1867.9171        | <b>934.4622</b>  | 1866.9331        | <b>933.9702</b>  | L    | <b>731.3682</b>  | 366.1878        | 714.3417         | 357.6745         | 713.3577         | 357.1825         | 6  |
| 18 | 2013.0023        | <b>1007.0048</b> | 1995.9757        | <b>998.4915</b>  | 1994.9917        | <b>997.9995</b>  | Q    | <b>618.2842</b>  | 309.6457        | <b>601.2576</b>  | 301.1325         | 600.2736         | 300.6404         | 5  |
| 19 | 2084.0394        | <b>1042.5233</b> | 2067.0128        | 1034.0100        | 2066.0288        | 1033.5180        | A    | <b>490.2256</b>  | 245.6164        | <b>473.1991</b>  | 237.1032         | <b>472.2150</b>  | 236.6112         | 4  |
| 20 | 2213.0820        | <b>1107.0446</b> | 2196.0554        | 1098.5313        | 2195.0714        | 1098.0393        | E    | <b>419.1885</b>  | 210.0979        | 402.1619         | 201.5846         | <b>401.1779</b>  | 201.0926         | 3  |
| 21 | 2328.1089        | 1164.5581        | 2311.0824        | 1156.0448        | 2310.0983        | 1155.5528        | D    | <b>290.1459</b>  | 145.5766        | <b>273.1193</b>  | 137.0633         | 272.1353         | 136.5713         | 2  |
| 22 |                  |                  |                  |                  |                  |                  | R    | 175.1190         | 88.0631         | 158.0924         | 79.5498          |                  |                  | 1  |

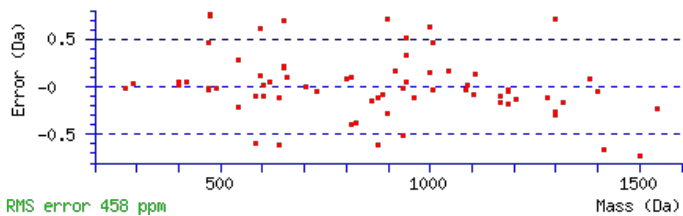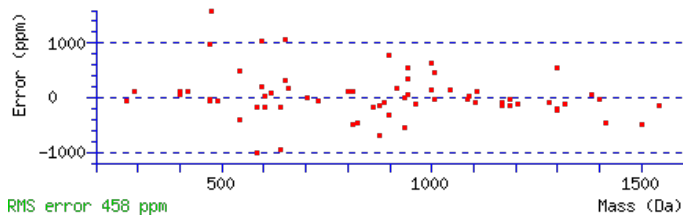

NCBI BLAST search of [VEEDTKVNSTVIPETQLQAEDR](#)

(Parameters: blastp, nr protein database, expect=20000, no filter, PAM30)

Other BLAST [web gateways](#)

All matches to this query

| Score | Mr(calc)  | Delta  | Sequence                               | Site Analysis        |
|-------|-----------|--------|----------------------------------------|----------------------|
| 48.7  | 2501.2133 | 0.0076 | <a href="#">VEEDTKVNSTVIPETQLQAEDR</a> | Deamidated N8 99.55% |
| 39.0  | 2500.2293 | 0.9916 | <a href="#">VEEDTKVNSTVIPETQLQAEDR</a> |                      |
| 23.5  | 2501.2133 | 0.0076 | <a href="#">VEEDTKVNSTVIPETQLQAEDR</a> | Deamidated Q16 0.30% |
| 20.4  | 2501.2133 | 0.0076 | <a href="#">VEEDTKVNSTVIPETQLQAEDR</a> | Deamidated Q18 0.15% |
| 12.5  | 2501.2121 | 0.0088 | <a href="#">GNIHWHASHMQLILIDQSINR</a>  |                      |
| 10.6  | 2501.2121 | 0.0088 | <a href="#">GNIHWHASHMQLILIDQSINR</a>  |                      |
| 10.4  | 2501.2121 | 0.0088 | <a href="#">GNIHWHASHMQLILIDQSINR</a>  |                      |
| 10.1  | 2500.2281 | 0.9928 | <a href="#">GNIHWHASHMQLILIDQSINR</a>  |                      |
| 9.9   | 2500.2162 | 1.0047 | <a href="#">QAMRNINPSTANSPKCQELALR</a> |                      |
| 9.9   | 2500.2162 | 1.0047 | <a href="#">QAMRNINPSTANSPKCQELALR</a> |                      |

Mascot: <http://www.matrixscience.com/>

# MATRIX SCIENCE Mascot Search Results

## Peptide View

MS/MS Fragmentation of **EYESYSDFERNVTEK**

Found in **F5GY80** in **con\_Xuniprot\_HUMAN3**, F5GY80\_HUMAN Complement component C8 beta chain OS=Homo sapiens GN=C8B PE=2 SV=1

Match to Query 11290: 1895.812908 from(948.913730,2+) intensity(9045.2861) rtinseconds(1222) scans(2881) index(23152)

Title: 111019\_Est\_MI\_YS\_G\_04Spectrum2446\_scans\_2881

Data file C:\mascot\20140703\_Tmgf\_1D\CSV\_UseAnalysis\MasterCSV\All\_Glyco\mgf\ptm\UC18ERLIC\_PTM\_35D.mgf

Click mouse within plot area to zoom in by factor of two about that point

Or, to Da

Label all possible matches Label matches used for scoring

Show Y-axis

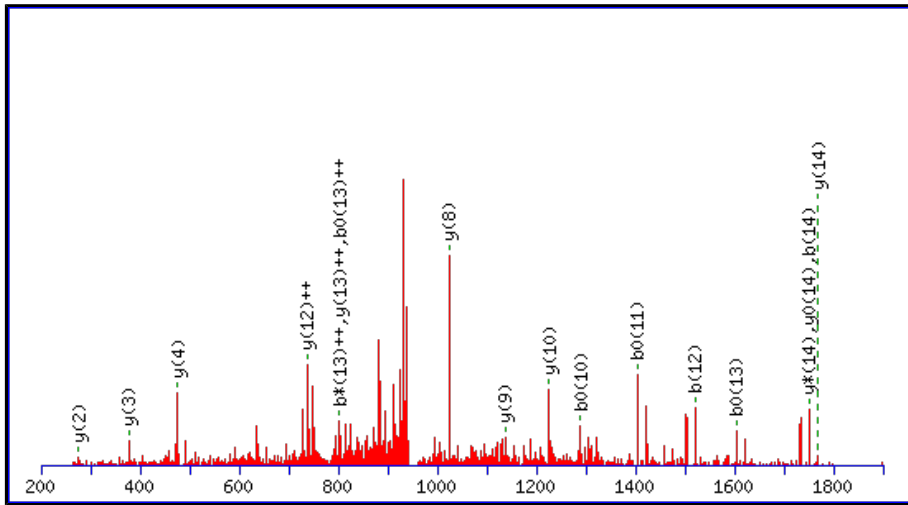

Monoisotopic mass of neutral peptide **Mr(calc)**: 1895.8061

Fixed modifications: Carbamidomethyl (C) (apply to specified residues or termini only)

Variable modifications:

N11 : Deamidated (NQ)

Ions Score: 57 Expect: 0.00013

Matches : 18/148 fragment ions using 16 most intense peaks ([help](#))

| #  | b         | b <sup>++</sup> | b <sup>*</sup> | b <sup>***</sup> | b <sup>0</sup> | b <sup>0++</sup> | Seq. | y         | y <sup>++</sup> | y <sup>*</sup> | y <sup>***</sup> | y <sup>0</sup> | y <sup>0++</sup> | #  |
|----|-----------|-----------------|----------------|------------------|----------------|------------------|------|-----------|-----------------|----------------|------------------|----------------|------------------|----|
| 1  | 130.0499  | 65.5286         |                |                  | 112.0393       | 56.5233          | E    |           |                 |                |                  |                |                  | 15 |
| 2  | 293.1132  | 147.0602        |                |                  | 275.1026       | 138.0550         | Y    | 1767.7708 | 884.3890        | 1750.7443      | 875.8758         | 1749.7602      | 875.3838         | 14 |
| 3  | 422.1558  | 211.5815        |                |                  | 404.1452       | 202.5763         | E    | 1604.7075 | 802.8574        | 1587.6809      | 794.3441         | 1586.6969      | 793.8521         | 13 |
| 4  | 509.1878  | 255.0975        |                |                  | 491.1773       | 246.0923         | S    | 1475.6649 | 738.3361        | 1458.6383      | 729.8228         | 1457.6543      | 729.3308         | 12 |
| 5  | 672.2511  | 336.6292        |                |                  | 654.2406       | 327.6239         | Y    | 1388.6329 | 694.8201        | 1371.6063      | 686.3068         | 1370.6223      | 685.8148         | 11 |
| 6  | 759.2832  | 380.1452        |                |                  | 741.2726       | 371.1399         | S    | 1225.5695 | 613.2884        | 1208.5430      | 604.7751         | 1207.5590      | 604.2831         | 10 |
| 7  | 874.3101  | 437.6587        |                |                  | 856.2996       | 428.6534         | D    | 1138.5375 | 569.7724        | 1121.5109      | 561.2591         | 1120.5269      | 560.7671         | 9  |
| 8  | 1021.3785 | 511.1929        |                |                  | 1003.3680      | 502.1876         | F    | 1023.5106 | 512.2589        | 1006.4840      | 503.7456         | 1005.5000      | 503.2536         | 8  |
| 9  | 1150.4211 | 575.7142        |                |                  | 1132.4106      | 566.7089         | E    | 876.4421  | 438.7247        | 859.4156       | 430.2114         | 858.4316       | 429.7194         | 7  |
| 10 | 1306.5222 | 653.7648        | 1289.4957      | 645.2515         | 1288.5117      | 644.7595         | R    | 747.3995  | 374.2034        | 730.3730       | 365.6901         | 729.3890       | 365.1981         | 6  |
| 11 | 1421.5492 | 711.2782        | 1404.5226      | 702.7650         | 1403.5386      | 702.2729         | N    | 591.2984  | 296.1529        | 574.2719       | 287.6396         | 573.2879       | 287.1476         | 5  |
| 12 | 1520.6176 | 760.8124        | 1503.5910      | 752.2992         | 1502.6070      | 751.8072         | V    | 476.2715  | 238.6394        | 459.2449       | 230.1261         | 458.2609       | 229.6341         | 4  |
| 13 | 1621.6653 | 811.3363        | 1604.6387      | 802.8230         | 1603.6547      | 802.3310         | T    | 377.2031  | 189.1052        | 360.1765       | 180.5919         | 359.1925       | 180.0999         | 3  |
| 14 | 1750.7079 | 875.8576        | 1733.6813      | 867.3443         | 1732.6973      | 866.8523         | E    | 276.1554  | 138.5813        | 259.1288       | 130.0681         | 258.1448       | 129.5761         | 2  |
| 15 |           |                 |                |                  |                |                  | K    | 147.1128  | 74.0600         | 130.0863       | 65.5468          |                |                  | 1  |

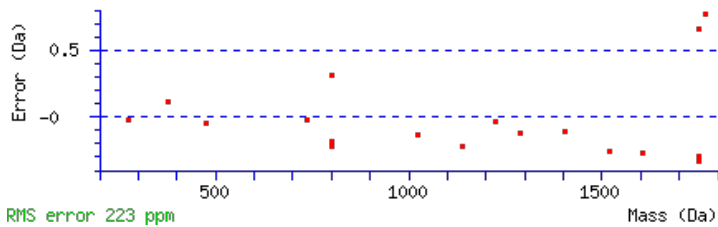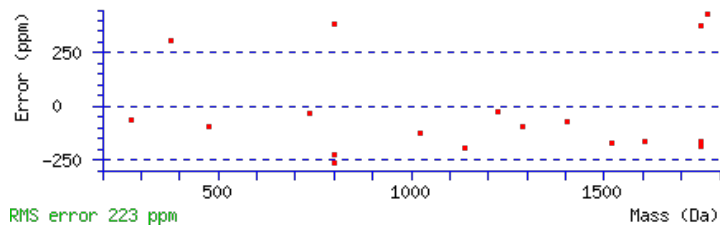

NCBI **BLAST** search of [EYESYSDFERNVTEK](#)

(Parameters: blastp, nr protein database, expect=20000, no filter, PAM30)

Other BLAST [web gateways](#)

**All matches to this query**

| Score | Mr(calc)  | Delta   | Sequence                            |
|-------|-----------|---------|-------------------------------------|
| 57.2  | 1895.8061 | 0.0068  | <a href="#">EYESYSDFERNVTEK</a>     |
| 9.2   | 1894.8045 | 1.0084  | <a href="#">SMEGSDGHAMKVVAMGMQK</a> |
| 8.5   | 1895.8054 | 0.0075  | <a href="#">MAQKSQGSNDLQEGQEK</a>   |
| 7.9   | 1895.8054 | 0.0075  | <a href="#">MAQKSQGSNDLQEGQEK</a>   |
| 7.9   | 1895.8054 | 0.0075  | <a href="#">MAQKSQGSNDLQEGQEK</a>   |
| 7.9   | 1895.8054 | 0.0075  | <a href="#">MAQKSQGSNDLQEGQEK</a>   |
| 7.4   | 1895.8054 | 0.0075  | <a href="#">MAQKSQGSNDLQEGQEK</a>   |
| 7.3   | 1895.8054 | 0.0075  | <a href="#">MAQKSQGSNDLQEGQEK</a>   |
| 6.8   | 1894.8124 | 1.0005  | <a href="#">MOHWCKRTLMDDNK</a>      |
| 5.7   | 1895.8142 | -0.0013 | <a href="#">HTTLNSCQNFAGKCEK</a>    |

Mascot: <http://www.matrixscience.com/>

# MASCOT SCIENCE Mascot Search Results

## Peptide View

MS/MS Fragmentation of **ANLSSQALQMSLDYGFVTPLTSMRSIR**

Found in **F5H7E1** in **con\_Xuniprot\_HUMAN3**, F5H7E1\_HUMAN Inter-alpha-trypsin inhibitor heavy chain H1 OS=Homo sapiens GN=ITIHI PE=2 SV=1

Match to Query 25753: 2846.384502 from(949.802110,3+) intensity(32605.8066) rtinseconds(2535) scans(6602) index(4034)

Title: 111019\_Est\_ISCardio\_NMI\_YP\_G\_6Spectrum5398\_scans\_6602

Data file C:\mascot\20140703\_Tmgf\_1D\CSV\_UseAnalysis\MasterCSV\All\_Glyco\mgf\ptm\UC18ERLIC\_PTM\_35D.mgf

Click mouse within plot area to zoom in by factor of two about that point

Or, to Da

Label all possible matches Label matches used for scoring

Show Y-axis

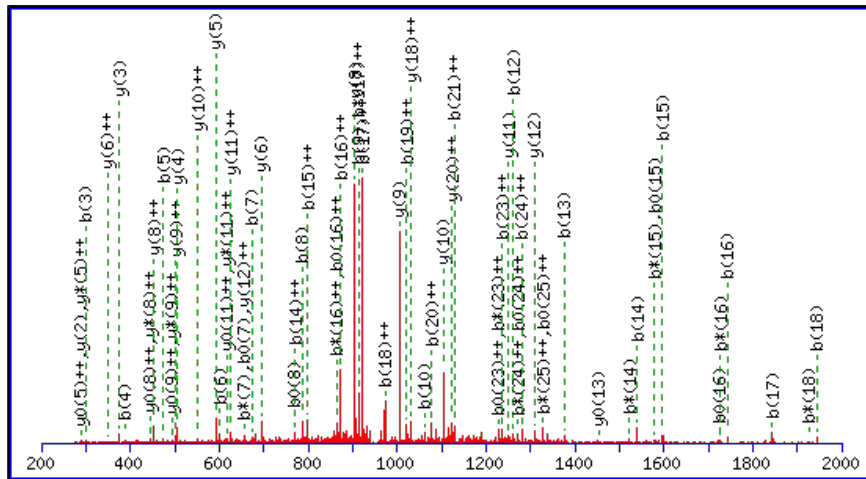

Monoisotopic mass of neutral peptide Mr(calc): 2846.3830

Fixed modifications: Carbamidomethyl (C) (apply to specified residues or termini only)

Variable modifications:

N2 : Deamidated (NQ)

M10 : Oxidation (M), with neutral losses 0.0000 (shown in table), 63.9983

Ions Score: 92 Expect: 1.8e-007

Matches : 70/438 fragment ions using 102 most intense peaks ([help](#))

| #  | b                | b <sup>++</sup>  | b*               | b <sup>*++</sup> | b <sup>0</sup>   | b <sup>0++</sup> | Seq. | y                | y <sup>++</sup>  | y*        | y <sup>*++</sup> | y <sup>0</sup>   | y <sup>0++</sup> | #  |
|----|------------------|------------------|------------------|------------------|------------------|------------------|------|------------------|------------------|-----------|------------------|------------------|------------------|----|
| 1  | 72.0444          | 36.5258          |                  |                  |                  |                  | A    |                  |                  |           |                  |                  |                  | 26 |
| 2  | 187.0713         | 94.0393          | 170.0448         | 85.5260          |                  |                  | N    | 2776.3532        | 1388.6802        | 2759.3266 | 1380.1670        | 2758.3426        | 1379.6750        | 25 |
| 3  | <b>300.1554</b>  | 150.5813         | 283.1288         | 142.0681         |                  |                  | L    | 2661.3263        | 1331.1668        | 2644.2997 | 1322.6535        | 2643.3157        | 1322.1615        | 24 |
| 4  | <b>387.1874</b>  | 194.0974         | 370.1609         | 185.5841         | 369.1769         | 185.0921         | S    | 2548.2422        | 1274.6247        | 2531.2156 | 1266.1115        | 2530.2316        | 1265.6194        | 23 |
| 5  | <b>474.2195</b>  | 237.6134         | 457.1929         | 229.1001         | 456.2089         | 228.6081         | S    | 2461.2102        | 1231.1087        | 2444.1836 | 1222.5954        | 2443.1996        | 1222.1034        | 22 |
| 6  | <b>602.2780</b>  | 301.6427         | 585.2515         | 293.1294         | 584.2675         | 292.6374         | Q    | 2374.1781        | 1187.5927        | 2357.1516 | 1179.0794        | 2356.1676        | 1178.5874        | 21 |
| 7  | <b>673.3151</b>  | 337.1612         | <b>656.2886</b>  | 328.6479         | <b>655.3046</b>  | 328.1559         | A    | 2246.1196        | <b>1123.5634</b> | 2229.0930 | 1115.0501        | 2228.1090        | 1114.5581        | 20 |
| 8  | <b>786.3992</b>  | 393.7032         | 769.3727         | 385.1900         | <b>768.3886</b>  | 384.6980         | L    | 2175.0824        | 1088.0449        | 2158.0559 | 1079.5316        | 2157.0719        | 1079.0396        | 19 |
| 9  | <b>914.4578</b>  | 457.7325         | 897.4312         | 449.2193         | 896.4472         | 448.7272         | Q    | 2061.9984        | <b>1031.5028</b> | 2044.9718 | 1022.9896        | 2043.9878        | 1022.4975        | 18 |
| 10 | <b>1061.4932</b> | 531.2502         | 1044.4666        | 522.7370         | 1043.4826        | 522.2449         | M    | 1933.9398        | 967.4735         | 1916.9133 | 958.9603         | 1915.9292        | 958.4683         | 17 |
| 11 | 1148.5252        | 574.7662         | 1131.4987        | 566.2530         | 1130.5147        | 565.7610         | S    | 1786.9044        | 893.9558         | 1769.8779 | 885.4426         | 1768.8938        | 884.9506         | 16 |
| 12 | <b>1261.6093</b> | 631.3083         | 1244.5827        | 622.7950         | 1243.5987        | 622.3030         | L    | 1699.8724        | 850.4398         | 1682.8458 | 841.9265         | 1681.8618        | 841.4345         | 15 |
| 13 | <b>1376.6362</b> | 688.8217         | 1359.6097        | 680.3085         | 1358.6257        | 679.8165         | D    | 1586.7883        | 793.8978         | 1569.7618 | 785.3845         | 1568.7777        | 784.8925         | 14 |
| 14 | <b>1539.6996</b> | <b>770.3534</b>  | <b>1522.6730</b> | 761.8401         | 1521.6890        | 761.3481         | Y    | 1471.7614        | 736.3843         | 1454.7348 | 727.8710         | <b>1453.7508</b> | 727.3790         | 13 |
| 15 | <b>1596.7210</b> | <b>798.8641</b>  | <b>1579.6945</b> | 790.3509         | <b>1578.7105</b> | 789.8589         | G    | <b>1308.6980</b> | <b>654.8527</b>  | 1291.6715 | 646.3394         | 1290.6875        | 645.8474         | 12 |
| 16 | <b>1743.7894</b> | <b>872.3984</b>  | <b>1726.7629</b> | <b>863.8851</b>  | <b>1725.7789</b> | <b>863.3931</b>  | F    | <b>1251.6766</b> | <b>626.3419</b>  | 1234.6500 | <b>617.8286</b>  | 1233.6660        | <b>617.3366</b>  | 11 |
| 17 | <b>1842.8578</b> | <b>921.9326</b>  | 1825.8313        | <b>913.4193</b>  | 1824.8473        | 912.9273         | V    | <b>1104.6082</b> | <b>552.8077</b>  | 1087.5816 | 544.2944         | 1086.5976        | 543.8024         | 10 |
| 18 | <b>1943.9055</b> | <b>972.4564</b>  | <b>1926.8790</b> | 963.9431         | 1925.8950        | 963.4511         | T    | <b>1005.5397</b> | <b>503.2735</b>  | 988.5132  | <b>494.7602</b>  | 987.5292         | <b>494.2682</b>  | 9  |
| 19 | 2040.9583        | <b>1020.9828</b> | 2023.9317        | 1012.4695        | 2022.9477        | 1011.9775        | P    | <b>904.4921</b>  | <b>452.7497</b>  | 887.4655  | <b>444.2364</b>  | 886.4815         | <b>443.7444</b>  | 8  |
| 20 | 2154.0424        | <b>1077.5248</b> | 2137.0158        | 1069.0115        | 2136.0318        | 1068.5195        | L    | 807.4393         | 404.2233         | 790.4128  | 395.7100         | 789.4287         | 395.2180         | 7  |
| 21 | 2255.0900        | <b>1128.0487</b> | 2238.0635        | 1119.5354        | 2237.0795        | 1119.0434        | T    | <b>694.3552</b>  | <b>347.6813</b>  | 677.3287  | 339.1680         | 676.3447         | 338.6760         | 6  |



|    |           |           |           |           |           |           |   |          |          |          |          |          |          |   |
|----|-----------|-----------|-----------|-----------|-----------|-----------|---|----------|----------|----------|----------|----------|----------|---|
| 22 | 2342.1221 | 1171.5647 | 2325.0955 | 1163.0514 | 2324.1115 | 1162.5594 | S | 593.3076 | 297.1574 | 576.2810 | 288.6441 | 575.2970 | 288.1521 | 5 |
| 23 | 2473.1625 | 1237.0849 | 2456.1360 | 1228.5716 | 2455.1520 | 1228.0796 | M | 506.2755 | 253.6414 | 489.2490 | 245.1281 | 488.2650 | 244.6361 | 4 |
| 24 | 2560.1946 | 1280.6009 | 2543.1680 | 1272.0876 | 2542.1840 | 1271.5956 | S | 375.2350 | 188.1212 | 358.2085 | 179.6079 | 357.2245 | 179.1159 | 3 |
| 25 | 2673.2786 | 1337.1430 | 2656.2521 | 1328.6297 | 2655.2681 | 1328.1377 | I | 288.2030 | 144.6051 | 271.1765 | 136.0919 |          |          | 2 |
| 26 |           |           |           |           |           |           | R | 175.1190 | 88.0631  | 158.0924 | 79.5498  |          |          | 1 |

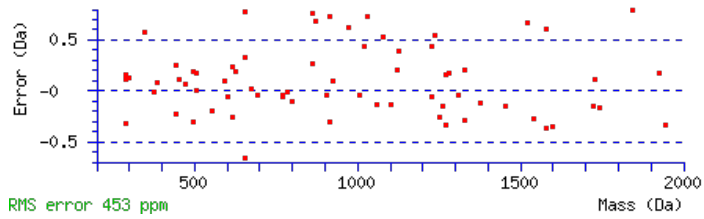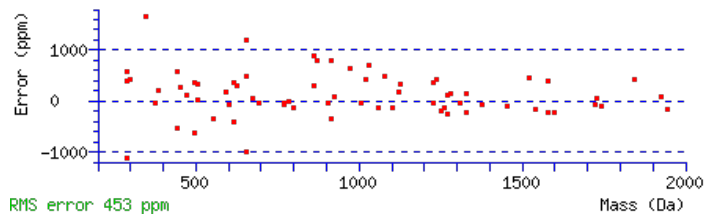

NCBI BLAST search of [ANLSSQALQMSLDYGFVTPLTSMISIR](#)  
 (Parameters: blastp, nr protein database, expect=20000, no filter, PAM30)  
 Other BLAST [web gateways](#)

All matches to this query

| Score | Mr(calc)  | Delta  | Sequence                                    | Site Analysis                        |
|-------|-----------|--------|---------------------------------------------|--------------------------------------|
| 91.8  | 2846.3830 | 0.0015 | <a href="#">ANLSSQALQMSLDYGFVTPLTSMISIR</a> | Deamidated N2, Oxidation M10; 99.50% |
| 68.8  | 2846.3830 | 0.0015 | <a href="#">ANLSSQALQMSLDYGFVTPLTSMISIR</a> | Deamidated Q6, Oxidation M10; 0.50%  |
| 48.8  | 2846.3830 | 0.0015 | <a href="#">ANLSSQALQMSLDYGFVTPLTSMISIR</a> | Deamidated Q9, Oxidation M10; 0.01%  |
| 27.1  | 2846.3830 | 0.0015 | <a href="#">ANLSSQALQMSLDYGFVTPLTSMISIR</a> | Deamidated N2, Oxidation M23; 0.00%  |
| 19.6  | 2845.3929 | 0.9916 | <a href="#">NVAHESAHTGPTIHVDMKERQPLSR</a>   |                                      |
| 12.9  | 2846.3830 | 0.0015 | <a href="#">ANLSSQALQMSLDYGFVTPLTSMISIR</a> | Deamidated Q6, Oxidation M23; 0.00%  |
| 7.0   | 2844.3864 | 1.9981 | <a href="#">GGPQLEAGLRWLIQPEPDLHSCNQK</a>   |                                      |
| 6.7   | 2845.3930 | 0.9915 | <a href="#">LQADPKQGMSLDIGQRLGFHGPDPHSS</a> |                                      |
| 6.3   | 2846.3830 | 0.0015 | <a href="#">ANLSSQALQMSLDYGFVTPLTSMISIR</a> | Deamidated Q9, Oxidation M23; 0.00%  |
| 6.1   | 2845.3772 | 1.0073 | <a href="#">TGATGFGLTMAVKAEKDMLCTGSQSLR</a> |                                      |

Mascot: <http://www.matrixscience.com/>

# MATRIX SCIENCE Mascot Search Results

## Peptide View

MS/MS Fragmentation of **ANLSSQALQMSLDYGFVTLTSMRSIR**

Found in **F5H7E1** in **con\_Xuniprot\_HUMAN3**, F5H7E1\_HUMAN Inter-alpha-trypsin inhibitor heavy chain H1 OS=Homo sapiens GN=ITIHI PE=2 SV=1

Match to Query 26002: 2862.390132 from(955.137320,3+) intensity(32998.7383) rtinseconds(2370) scans(6144) index(25582)

Title: 111019\_Est\_MI\_YS\_G\_07Spectrum5282\_scans\_6144

Data file C:\mascot\20140703\_Tmgf\_1D\CSV\_UseAnalysis\MasterCSV\All\_Glyco\mgf\ptm\UC18ERLIC\_PTM\_35D.mgf

Click mouse within plot area to zoom in by factor of two about that point

Or, to Da

Label all possible matches Label matches used for scoring

Show Y-axis

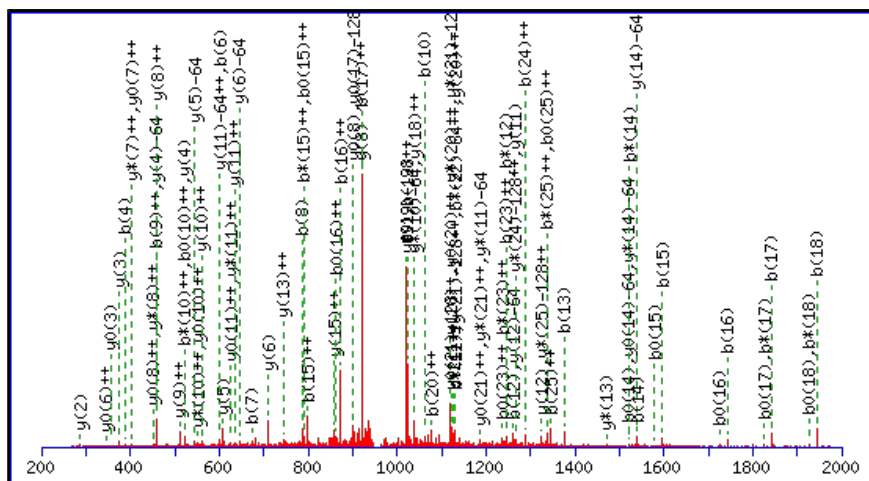

Monoisotopic mass of neutral peptide Mr(calc): 2862.3779

Fixed modifications: Carbamidomethyl (C) (apply to specified residues or termini only)

Variable modifications:

N2 : Deamidated (NQ)

M10 : Oxidation (M), with neutral losses 0.0000(shown in table), 63.9983

M23 : Oxidation (M), with neutral losses 0.0000(shown in table), 63.9983

Ions Score: 81 Expect: 2.1e-006

Matches : 95/516 fragment ions using 104 most intense peaks ([help](#))

| #  | b                | b <sup>++</sup>  | b <sup>*</sup>   | b <sup>*++</sup> | b <sup>0</sup>   | b <sup>0++</sup> | Seq. | y                | y <sup>++</sup>  | y <sup>*</sup>   | y <sup>*++</sup> | y <sup>0</sup>  | y <sup>0++</sup> | #  |
|----|------------------|------------------|------------------|------------------|------------------|------------------|------|------------------|------------------|------------------|------------------|-----------------|------------------|----|
| 1  | 72.0444          | 36.5258          |                  |                  |                  |                  | A    |                  |                  |                  |                  |                 |                  | 26 |
| 2  | 187.0713         | 94.0393          | 170.0448         | 85.5260          |                  |                  | N    | 2792.3481        | 1396.6777        | 2775.3216        | 1388.1644        | 2774.3375       | 1387.6724        | 25 |
| 3  | 300.1554         | 150.5813         | 283.1288         | 142.0681         |                  |                  | L    | 2677.3212        | 1339.1642        | 2660.2946        | 1330.6509        | 2659.3106       | 1330.1589        | 24 |
| 4  | <b>387.1874</b>  | 194.0974         | 370.1609         | 185.5841         | 369.1769         | 185.0921         | S    | 2564.2371        | 1282.6222        | 2547.2106        | 1274.1089        | 2546.2265       | 1273.6169        | 23 |
| 5  | 474.2195         | 237.6134         | 457.1929         | 229.1001         | 456.2089         | 228.6081         | S    | 2477.2051        | 1239.1062        | 2460.1785        | 1230.5929        | 2459.1945       | 1230.1009        | 22 |
| 6  | <b>602.2780</b>  | 301.6427         | 585.2515         | 293.1294         | 584.2675         | 292.6374         | Q    | 2390.1730        | 1195.5902        | 2373.1465        | <b>1187.0769</b> | 2372.1625       | <b>1186.5849</b> | 21 |
| 7  | <b>673.3151</b>  | 337.1612         | 656.2886         | 328.6479         | 655.3046         | 328.1559         | A    | 2262.1145        | <b>1131.5609</b> | 2245.0879        | <b>1123.0476</b> | 2244.1039       | <b>1122.5556</b> | 20 |
| 8  | <b>786.3992</b>  | 393.7032         | 769.3727         | 385.1900         | 768.3886         | 384.6980         | L    | 2191.0774        | 1096.0423        | 2174.0508        | 1087.5290        | 2173.0668       | 1087.0370        | 19 |
| 9  | 914.4578         | <b>457.7325</b>  | 897.4312         | 449.2193         | 896.4472         | 448.7272         | Q    | 2077.9933        | <b>1039.5003</b> | 2060.9667        | 1030.9870        | 2059.9827       | 1030.4950        | 18 |
| 10 | <b>1061.4932</b> | 531.2502         | 1044.4666        | <b>522.7370</b>  | 1043.4826        | <b>522.2449</b>  | M    | 1949.9347        | 975.4710         | 1932.9082        | 966.9577         | 1931.9241       | 966.4657         | 17 |
| 11 | 1148.5252        | 574.7662         | <b>1131.4987</b> | 566.2530         | 1130.5147        | 565.7610         | S    | 1802.8993        | <b>901.9533</b>  | 1785.8728        | 893.4400         | 1784.8887       | 892.9480         | 16 |
| 12 | <b>1261.6093</b> | 631.3083         | <b>1244.5827</b> | 622.7950         | 1243.5987        | 622.3030         | L    | 1715.8673        | <b>858.4373</b>  | 1698.8407        | 849.9240         | 1697.8567       | 849.4320         | 15 |
| 13 | <b>1376.6362</b> | 688.8217         | 1359.6097        | 680.3085         | 1358.6257        | 679.8165         | D    | 1602.7832        | 801.8952         | 1585.7567        | 793.3820         | 1584.7727       | 792.8900         | 14 |
| 14 | <b>1539.6996</b> | 770.3534         | <b>1522.6730</b> | 761.8401         | <b>1521.6890</b> | 761.3481         | Y    | 1487.7563        | <b>744.3818</b>  | <b>1470.7297</b> | 735.8685         | 1469.7457       | 735.3765         | 13 |
| 15 | <b>1596.7210</b> | <b>798.8641</b>  | 1579.6945        | <b>790.3509</b>  | <b>1578.7105</b> | <b>789.8589</b>  | G    | <b>1324.6930</b> | 662.8501         | 1307.6664        | 654.3368         | 1306.6824       | 653.8448         | 12 |
| 16 | <b>1743.7894</b> | <b>872.3984</b>  | 1726.7629        | 863.8851         | <b>1725.7789</b> | <b>863.3931</b>  | F    | <b>1267.6715</b> | <b>634.3394</b>  | 1250.6449        | <b>625.8261</b>  | 1249.6609       | <b>625.3341</b>  | 11 |
| 17 | <b>1842.8578</b> | <b>921.9326</b>  | <b>1825.8313</b> | 913.4193         | <b>1824.8473</b> | 912.9273         | V    | <b>1120.6031</b> | <b>560.8052</b>  | 1103.5765        | <b>552.2919</b>  | 1102.5925       | <b>551.7999</b>  | 10 |
| 18 | <b>1943.9055</b> | 972.4564         | <b>1926.8790</b> | 963.9431         | <b>1925.8950</b> | 963.4511         | T    | <b>1021.5347</b> | <b>511.2710</b>  | 1004.5081        | 502.7577         | 1003.5241       | 502.2657         | 9  |
| 19 | 2040.9583        | <b>1020.9828</b> | 2023.9317        | 1012.4695        | 2022.9477        | 1011.9775        | P    | <b>920.4870</b>  | <b>460.7471</b>  | 903.4604         | <b>452.2339</b>  | <b>902.4764</b> | <b>451.7418</b>  | 8  |
| 20 | 2154.0424        | <b>1077.5248</b> | 2137.0158        | 1069.0115        | 2136.0318        | 1068.5195        | L    | 823.4342         | 412.2207         | 806.4077         | <b>403.7075</b>  | 805.4237        | <b>403.2155</b>  | 7  |
| 21 | 2255.0900        | <b>1128.0487</b> | 2238.0635        | 1119.5354        | 2237.0795        | 1119.0434        | T    | <b>710.3502</b>  | 355.6787         | 693.3236         | 347.1654         | 692.3396        | <b>346.6734</b>  | 6  |

|    |           |           |           |           |           |           |   |          |          |          |          |          |          |   |
|----|-----------|-----------|-----------|-----------|-----------|-----------|---|----------|----------|----------|----------|----------|----------|---|
| 22 | 2342.1221 | 1171.5647 | 2325.0955 | 1163.0514 | 2324.1115 | 1162.5594 | S | 609.3025 | 305.1549 | 592.2759 | 296.6416 | 591.2919 | 296.1496 | 5 |
| 23 | 2489.1575 | 1245.0824 | 2472.1309 | 1236.5691 | 2471.1469 | 1236.0771 | M | 522.2704 | 261.6389 | 505.2439 | 253.1256 | 504.2599 | 252.6336 | 4 |
| 24 | 2576.1895 | 1288.5984 | 2559.1629 | 1280.0851 | 2558.1789 | 1279.5931 | S | 375.2350 | 188.1212 | 358.2085 | 179.6079 | 357.2245 | 179.1159 | 3 |
| 25 | 2689.2735 | 1345.1404 | 2672.2470 | 1336.6271 | 2671.2630 | 1336.1351 | I | 288.2030 | 144.6051 | 271.1765 | 136.0919 |          |          | 2 |
| 26 |           |           |           |           |           |           | R | 175.1190 | 88.0631  | 158.0924 | 79.5498  |          |          | 1 |

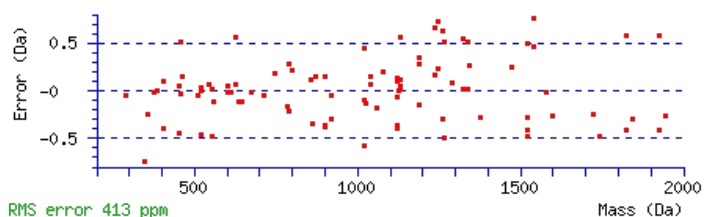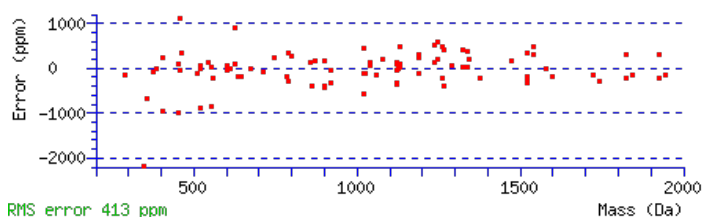

NCBI BLAST search of [ANLSSQALQMSLDYGFVTPLTSMSIR](#)  
 (Parameters: blastp, nr protein database, expect=20000, no filter, PAM30)  
 Other BLAST [web gateways](#)

All matches to this query

| Score | Mr(calc)  | Delta   | Sequence                                   | Site Analysis        |
|-------|-----------|---------|--------------------------------------------|----------------------|
| 81.2  | 2862.3779 | 0.0122  | <a href="#">ANLSSQALQMSLDYGFVTPLTSMSIR</a> | Deamidated N2 71.14% |
| 74.8  | 2862.3779 | 0.0122  | <a href="#">ANLSSQALQMSLDYGFVTPLTSMSIR</a> | Deamidated Q9 16.52% |
| 73.5  | 2862.3779 | 0.0122  | <a href="#">ANLSSQALQMSLDYGFVTPLTSMSIR</a> | Deamidated Q6 12.33% |
| 62.4  | 2861.3939 | 0.9962  | <a href="#">ANLSSQALQMSLDYGFVTPLTSMSIR</a> |                      |
| 10.7  | 2862.3930 | -0.0029 | <a href="#">AGSEQEEGFEGLPRRVTDLGMVSNLR</a> |                      |
| 5.4   | 2860.3701 | 2.0200  | <a href="#">MQLTERWYSNNQKILSLSQNFDK</a>    |                      |
| 5.4   | 2860.3800 | 2.0101  | <a href="#">DIMQQTSTVIGQQLRYAQEQLYK</a>    |                      |
| 5.0   | 2862.3779 | 0.0122  | <a href="#">ENDPNDPCKILVATDAIGMGLNLSIR</a> |                      |
| 4.9   | 2861.3939 | 0.9962  | <a href="#">ENDPNDPCKILVATDAIGMGLNLSIR</a> |                      |
| 4.9   | 2861.3939 | 0.9962  | <a href="#">ENDPNDPCKILVATDAIGMGLNLSIR</a> |                      |

Mascot: <http://www.matrixscience.com/>

# MASCOT SCIENCE Mascot Search Results

## Peptide View

MS/MS Fragmentation of **ANLSSQALQMSLDYGFVTPLTSMISR**

Found in **F5H7E1** in **con\_Xuniprot\_HUMAN3**, F5H7E1\_HUMAN Inter-alpha-trypsin inhibitor heavy chain H1 OS=Homo sapiens GN=ITI1H1 PE=2 SV=1

Match to Query 25762: 2846.393412 from(949.805080,3+) intensity(52629.7070) rtinseconds(2488) scans(6352) index(10449)

Title: 111019\_Est\_ISCardio\_NMI\_YS\_G\_6Spectrum5473\_scans\_6352

Data file C:\mascot\20140703\_Tmgf\_1D\CSV\_UseAnalysis\MasterCSV\All\_Glyco\mgf\ptm\UC18ERLIC\_PTM\_35D.mgf

Click mouse within plot area to zoom in by factor of two about that point

Or, to Da

Label all possible matches Label matches used for scoring

Show Y-axis

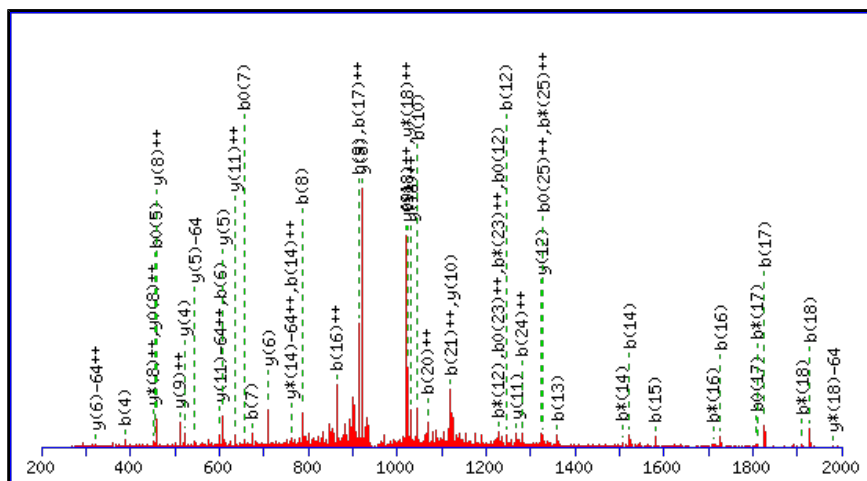

Monoisotopic mass of neutral peptide Mr(calc): 2846.3830

Fixed modifications: Carbamidomethyl (C) (apply to specified residues or termini only)

Variable modifications:

N2 : Deamidated (NQ)

M23 : Oxidation (M), with neutral losses 0.0000(shown in table), 63.9983

Ions Score: 78 Expect: 4.3e-006

Matches : 53/438 fragment ions using 70 most intense peaks ([help](#))

| #  | b                | b <sup>++</sup>  | b*               | b <sup>*++</sup> | b <sup>0</sup>   | b <sup>0++</sup> | Seq. | y                | y <sup>++</sup>  | y*        | y <sup>*++</sup> | y <sup>0</sup> | y <sup>0++</sup> | #  |
|----|------------------|------------------|------------------|------------------|------------------|------------------|------|------------------|------------------|-----------|------------------|----------------|------------------|----|
| 1  | 72.0444          | 36.5258          |                  |                  |                  |                  | A    |                  |                  |           |                  |                |                  | 26 |
| 2  | 187.0713         | 94.0393          | 170.0448         | 85.5260          |                  |                  | N    | 2776.3532        | 1388.6802        | 2759.3266 | 1380.1670        | 2758.3426      | 1379.6750        | 25 |
| 3  | 300.1554         | 150.5813         | 283.1288         | 142.0681         |                  |                  | L    | 2661.3263        | 1331.1668        | 2644.2997 | 1322.6535        | 2643.3157      | 1322.1615        | 24 |
| 4  | <b>387.1874</b>  | 194.0974         | 370.1609         | 185.5841         | 369.1769         | 185.0921         | S    | 2548.2422        | 1274.6247        | 2531.2156 | 1266.1115        | 2530.2316      | 1265.6194        | 23 |
| 5  | 474.2195         | 237.6134         | 457.1929         | 229.1001         | <b>456.2089</b>  | 228.6081         | S    | 2461.2102        | 1231.1087        | 2444.1836 | 1222.5954        | 2443.1996      | 1222.1034        | 22 |
| 6  | <b>602.2780</b>  | 301.6427         | 585.2515         | 293.1294         | 584.2675         | 292.6374         | Q    | 2374.1781        | 1187.5927        | 2357.1516 | 1179.0794        | 2356.1676      | 1178.5874        | 21 |
| 7  | <b>673.3151</b>  | 337.1612         | 656.2886         | 328.6479         | <b>655.3046</b>  | 328.1559         | A    | 2246.1196        | 1123.5634        | 2229.0930 | 1115.0501        | 2228.1090      | 1114.5581        | 20 |
| 8  | <b>786.3992</b>  | 393.7032         | 769.3727         | 385.1900         | 768.3886         | 384.6980         | L    | 2175.0824        | 1088.0449        | 2158.0559 | 1079.5316        | 2157.0719      | 1079.0396        | 19 |
| 9  | <b>914.4578</b>  | 457.7325         | 897.4312         | 449.2193         | 896.4472         | 448.7272         | Q    | 2061.9984        | <b>1031.5028</b> | 2044.9718 | <b>1022.9896</b> | 2043.9878      | <b>1022.4975</b> | 18 |
| 10 | <b>1045.4983</b> | 523.2528         | 1028.4717        | 514.7395         | 1027.4877        | 514.2475         | M    | 1933.9398        | 967.4735         | 1916.9133 | 958.9603         | 1915.9292      | 958.4683         | 17 |
| 11 | 1132.5303        | 566.7688         | 1115.5038        | 558.2555         | 1114.5197        | 557.7635         | S    | 1802.8993        | 901.9533         | 1785.8728 | 893.4400         | 1784.8887      | 892.9480         | 16 |
| 12 | <b>1245.6144</b> | 623.3108         | <b>1228.5878</b> | 614.7975         | <b>1227.6038</b> | 614.3055         | L    | 1715.8673        | 858.4373         | 1698.8407 | 849.9240         | 1697.8567      | 849.4320         | 15 |
| 13 | <b>1360.6413</b> | 680.8243         | 1343.6148        | 672.3110         | 1342.6307        | 671.8190         | D    | 1602.7832        | 801.8952         | 1585.7567 | 793.3820         | 1584.7727      | 792.8900         | 14 |
| 14 | <b>1523.7046</b> | <b>762.3560</b>  | <b>1506.6781</b> | 753.8427         | 1505.6941        | 753.3507         | Y    | 1487.7563        | 744.3818         | 1470.7297 | 735.8685         | 1469.7457      | 735.3765         | 13 |
| 15 | <b>1580.7261</b> | 790.8667         | 1563.6996        | 782.3534         | 1562.7155        | 781.8614         | G    | <b>1324.6930</b> | 662.8501         | 1307.6664 | 654.3368         | 1306.6824      | 653.8448         | 12 |
| 16 | <b>1727.7945</b> | <b>864.4009</b>  | <b>1710.7680</b> | 855.8876         | 1709.7839        | 855.3956         | F    | <b>1267.6715</b> | <b>634.3394</b>  | 1250.6449 | 625.8261         | 1249.6609      | 625.3341         | 11 |
| 17 | <b>1826.8629</b> | <b>913.9351</b>  | <b>1809.8364</b> | 905.4218         | <b>1808.8524</b> | 904.9298         | V    | <b>1120.6031</b> | 560.8052         | 1103.5765 | 552.2919         | 1102.5925      | 551.7999         | 10 |
| 18 | <b>1927.9106</b> | 964.4589         | <b>1910.8841</b> | 955.9457         | 1909.9000        | 955.4537         | T    | <b>1021.5347</b> | <b>511.2710</b>  | 1004.5081 | 502.7577         | 1003.5241      | 502.2657         | 9  |
| 19 | 2024.9634        | 1012.9853        | 2007.9368        | 1004.4720        | 2006.9528        | 1003.9800        | P    | <b>920.4870</b>  | <b>460.7471</b>  | 903.4604  | <b>452.2339</b>  | 902.4764       | <b>451.7418</b>  | 8  |
| 20 | 2138.0474        | <b>1069.5274</b> | 2121.0209        | 1061.0141        | 2120.0369        | 1060.5221        | L    | 823.4342         | 412.2207         | 806.4077  | 403.7075         | 805.4237       | 403.2155         | 7  |
| 21 | 2239.0951        | <b>1120.0512</b> | 2222.0686        | 1111.5379        | 2221.0845        | 1111.0459        | T    | <b>710.3502</b>  | 355.6787         | 693.3236  | 347.1654         | 692.3396       | 346.6734         | 6  |

|    |           |           |           |           |           |           |   |          |          |          |          |          |          |   |
|----|-----------|-----------|-----------|-----------|-----------|-----------|---|----------|----------|----------|----------|----------|----------|---|
| 22 | 2326.1271 | 1163.5672 | 2309.1006 | 1155.0539 | 2308.1166 | 1154.5619 | S | 609.3025 | 305.1549 | 592.2759 | 296.6416 | 591.2919 | 296.1496 | 5 |
| 23 | 2473.1625 | 1237.0849 | 2456.1360 | 1228.5716 | 2455.1520 | 1228.0796 | M | 522.2704 | 261.6389 | 505.2439 | 253.1256 | 504.2599 | 252.6336 | 4 |
| 24 | 2560.1946 | 1280.6009 | 2543.1680 | 1272.0876 | 2542.1840 | 1271.5956 | S | 375.2350 | 188.1212 | 358.2085 | 179.6079 | 357.2245 | 179.1159 | 3 |
| 25 | 2673.2786 | 1337.1430 | 2656.2521 | 1328.6297 | 2655.2681 | 1328.1377 | I | 288.2030 | 144.6051 | 271.1765 | 136.0919 |          |          | 2 |
| 26 |           |           |           |           |           |           | R | 175.1190 | 88.0631  | 158.0924 | 79.5498  |          |          | 1 |

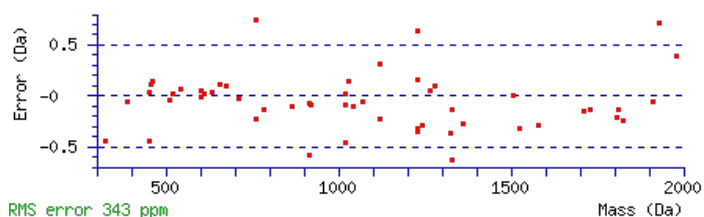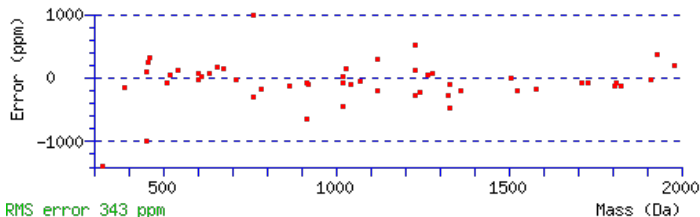

NCBI BLAST search of [ANLSSQALQMSLDYGFVTPLTSMISIR](#)  
 (Parameters: blastp, nr protein database, expect=20000, no filter, PAM30)  
 Other BLAST [web gateways](#)

All matches to this query

| Score | Mr(calc)  | Delta   | Sequence                                    | Site Analysis                        |
|-------|-----------|---------|---------------------------------------------|--------------------------------------|
| 77.9  | 2846.3830 | 0.0104  | <a href="#">ANLSSQALQMSLDYGFVTPLTSMISIR</a> | Deamidated N2, Oxidation M23; 85.34% |
| 70.0  | 2846.3830 | 0.0104  | <a href="#">ANLSSQALQMSLDYGFVTPLTSMISIR</a> | Deamidated Q6, Oxidation M23; 13.81% |
| 57.9  | 2846.3830 | 0.0104  | <a href="#">ANLSSQALQMSLDYGFVTPLTSMISIR</a> | Deamidated Q9, Oxidation M23; 0.85%  |
| 37.8  | 2845.3990 | 0.9944  | <a href="#">ANLSSQALQMSLDYGFVTPLTSMISIR</a> |                                      |
| 16.3  | 2846.4008 | -0.0074 | <a href="#">MDSAVQASLSLPATPVGKGTENTFSPK</a> |                                      |
| 13.9  | 2846.4008 | -0.0074 | <a href="#">MDSAVQASLSLPATPVGKGTENTFSPK</a> |                                      |
| 13.0  | 2846.3830 | 0.0104  | <a href="#">ANLSSQALQMSLDYGFVTPLTSMISIR</a> | Deamidated N2, Oxidation M10; 0.00%  |
| 11.9  | 2844.3739 | 2.0196  | <a href="#">MVTQFKEKNESLOYETSNPTVQLK</a>    |                                      |
| 10.6  | 2844.3820 | 2.0114  | <a href="#">EQLHTPVMMQTPQLTSTIMREPK</a>     |                                      |
| 7.5   | 2846.3830 | 0.0104  | <a href="#">ANLSSQALQMSLDYGFVTPLTSMISIR</a> | Deamidated Q6, Oxidation M10; 0.00%  |

Mascot: <http://www.matrixscience.com/>

# MASCOT SCIENCE Mascot Search Results

## Peptide View

MS/MS Fragmentation of **ANLSSQALQMSLDYGFVTPLTSMISIR**

Found in **F5H7E1** in **con\_Xuniprot\_HUMAN3**, F5H7E1\_HUMAN Inter-alpha-trypsin inhibitor heavy chain H1 OS=Homo sapiens GN=ITIHI PE=2 SV=1

Match to Query 25750: 2830.401042 from(944.474290,3+) intensity(9612.0117) rtinseconds(2681) scans(6962) index(23554)

Title: 111019\_Est\_MI\_YS\_G\_04Spectrum6052\_scans\_6962

Data file C:\mascot\20140703\_Tmgf\_1D\CSV\_UseAnalysis\MasterCSV\All\_Glyco\mgf\ptm\UC18ERLIC\_PTM\_35D.mgf

Click mouse within plot area to zoom in by factor of two about that point

Or, to Da

Label all possible matches Label matches used for scoring

Show Y-axis

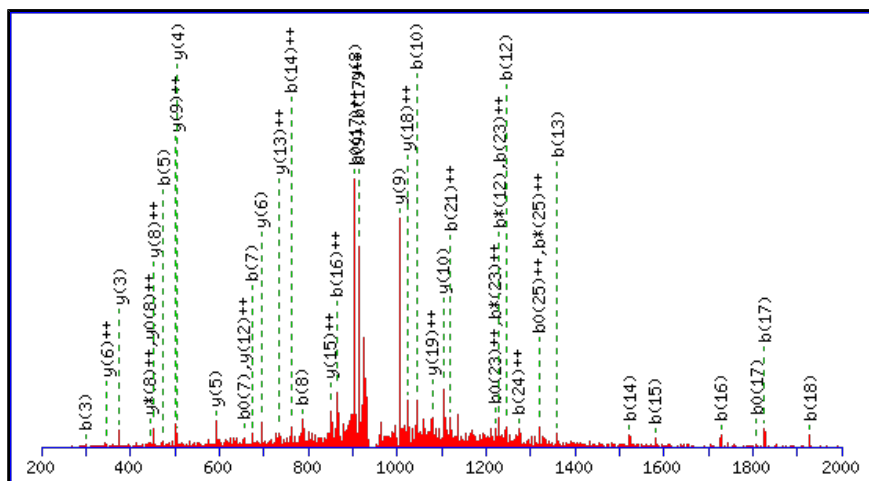

Monoisotopic mass of neutral peptide Mr(calc): 2830.3881

Fixed modifications: Carbamidomethyl (C) (apply to specified residues or termini only)

Variable modifications:

N2 : Deamidated (NQ)

Ions Score: 71 Expect: 2.1e-005

Matches : 44/288 fragment ions using 69 most intense peaks ([help](#))

| #  | b                | b <sup>++</sup>  | b <sup>*</sup>   | b <sup>*++</sup> | b <sup>0</sup>   | b <sup>0++</sup> | Seq. | y                | y <sup>++</sup>  | y <sup>*</sup> | y <sup>*++</sup> | y <sup>0</sup> | y <sup>0++</sup> | #  |
|----|------------------|------------------|------------------|------------------|------------------|------------------|------|------------------|------------------|----------------|------------------|----------------|------------------|----|
| 1  | 72.0444          | 36.5258          |                  |                  |                  |                  | A    |                  |                  |                |                  |                |                  | 26 |
| 2  | 187.0713         | 94.0393          | 170.0448         | 85.5260          |                  |                  | N    | 2760.3583        | 1380.6828        | 2743.3317      | 1372.1695        | 2742.3477      | 1371.6775        | 25 |
| 3  | <b>300.1554</b>  | 150.5813         | 283.1288         | 142.0681         |                  |                  | L    | 2645.3313        | 1323.1693        | 2628.3048      | 1314.6560        | 2627.3208      | 1314.1640        | 24 |
| 4  | 387.1874         | 194.0974         | 370.1609         | 185.5841         | 369.1769         | 185.0921         | S    | 2532.2473        | 1266.6273        | 2515.2207      | 1258.1140        | 2514.2367      | 1257.6220        | 23 |
| 5  | <b>474.2195</b>  | 237.6134         | 457.1929         | 229.1001         | 456.2089         | 228.6081         | S    | 2445.2152        | 1223.1113        | 2428.1887      | 1214.5980        | 2427.2047      | 1214.1060        | 22 |
| 6  | 602.2780         | 301.6427         | 585.2515         | 293.1294         | 584.2675         | 292.6374         | Q    | 2358.1832        | 1179.5952        | 2341.1567      | 1171.0820        | 2340.1727      | 1170.5900        | 21 |
| 7  | <b>673.3151</b>  | 337.1612         | 656.2886         | 328.6479         | <b>655.3046</b>  | 328.1559         | A    | 2230.1246        | 1115.5660        | 2213.0981      | 1107.0527        | 2212.1141      | 1106.5607        | 20 |
| 8  | <b>786.3992</b>  | 393.7032         | 769.3727         | 385.1900         | 768.3886         | 384.6980         | L    | 2159.0875        | <b>1080.0474</b> | 2142.0610      | 1071.5341        | 2141.0770      | 1071.0421        | 19 |
| 9  | <b>914.4578</b>  | 457.7325         | 897.4312         | 449.2193         | 896.4472         | 448.7272         | Q    | 2046.0035        | <b>1023.5054</b> | 2028.9769      | 1014.9921        | 2027.9929      | 1014.5001        | 18 |
| 10 | <b>1045.4983</b> | 523.2528         | 1028.4717        | 514.7395         | 1027.4877        | 514.2475         | M    | 1917.9449        | 959.4761         | 1900.9183      | 950.9628         | 1899.9343      | 950.4708         | 17 |
| 11 | 1132.5303        | 566.7688         | 1115.5038        | 558.2555         | 1114.5197        | 557.7635         | S    | 1786.9044        | 893.9558         | 1769.8779      | 885.4426         | 1768.8938      | 884.9506         | 16 |
| 12 | <b>1245.6144</b> | 623.3108         | <b>1228.5878</b> | 614.7975         | 1227.6038        | 614.3055         | L    | 1699.8724        | <b>850.4398</b>  | 1682.8458      | 841.9265         | 1681.8618      | 841.4345         | 15 |
| 13 | <b>1360.6413</b> | 680.8243         | 1343.6148        | 672.3110         | 1342.6307        | 671.8190         | D    | 1586.7883        | 793.8978         | 1569.7618      | 785.3845         | 1568.7777      | 784.8925         | 14 |
| 14 | <b>1523.7046</b> | <b>762.3560</b>  | 1506.6781        | 753.8427         | 1505.6941        | 753.3507         | Y    | 1471.7614        | <b>736.3843</b>  | 1454.7348      | 727.8710         | 1453.7508      | 727.3790         | 13 |
| 15 | <b>1580.7261</b> | 790.8667         | 1563.6996        | 782.3534         | 1562.7155        | 781.8614         | G    | 1308.6980        | <b>654.8527</b>  | 1291.6715      | 646.3394         | 1290.6875      | 645.8474         | 12 |
| 16 | <b>1727.7945</b> | <b>864.4009</b>  | 1710.7680        | 855.8876         | 1709.7839        | 855.3956         | F    | 1251.6766        | 626.3419         | 1234.6500      | 617.8286         | 1233.6660      | 617.3366         | 11 |
| 17 | <b>1826.8629</b> | <b>913.9351</b>  | 1809.8364        | 905.4218         | <b>1808.8524</b> | <b>904.9298</b>  | V    | <b>1104.6082</b> | 552.8077         | 1087.5816      | 544.2944         | 1086.5976      | 543.8024         | 10 |
| 18 | <b>1927.9106</b> | 964.4589         | 1910.8841        | 955.9457         | 1909.9000        | 955.4537         | T    | <b>1005.5397</b> | <b>503.2735</b>  | 988.5132       | 494.7602         | 987.5292       | 494.2682         | 9  |
| 19 | 2024.9634        | 1012.9853        | 2007.9368        | 1004.4720        | 2006.9528        | 1003.9800        | P    | <b>904.4921</b>  | <b>452.7497</b>  | 887.4655       | <b>444.2364</b>  | 886.4815       | <b>443.7444</b>  | 8  |
| 20 | 2138.0474        | 1069.5274        | 2121.0209        | 1061.0141        | 2120.0369        | 1060.5221        | L    | 807.4393         | 404.2233         | 790.4128       | 395.7100         | 789.4287       | 395.2180         | 7  |
| 21 | 2239.0951        | <b>1120.0512</b> | 2222.0686        | 1111.5379        | 2221.0845        | 1111.0459        | T    | <b>694.3552</b>  | <b>347.6813</b>  | 677.3287       | 339.1680         | 676.3447       | 338.6760         | 6  |
| 22 | 2326.1271        | 1163.5672        | 2309.1006        | 1155.0539        | 2308.1166        | 1154.5619        | S    | <b>593.3076</b>  | 297.1574         | 576.2810       | 288.6441         | 575.2970       | 288.1521         | 5  |

|    |           |           |           |           |           |           |   |          |          |          |          |          |          |   |
|----|-----------|-----------|-----------|-----------|-----------|-----------|---|----------|----------|----------|----------|----------|----------|---|
| 23 | 2457.1676 | 1229.0875 | 2440.1411 | 1220.5742 | 2439.1571 | 1220.0822 | M | 506.2755 | 253.6414 | 489.2490 | 245.1281 | 488.2650 | 244.6361 | 4 |
| 24 | 2544.1997 | 1272.6035 | 2527.1731 | 1264.0902 | 2526.1891 | 1263.5982 | S | 375.2350 | 188.1212 | 358.2085 | 179.6079 | 357.2245 | 179.1159 | 3 |
| 25 | 2657.2837 | 1329.1455 | 2640.2572 | 1320.6322 | 2639.2732 | 1320.1402 | I | 288.2030 | 144.6051 | 271.1765 | 136.0919 |          |          | 2 |
| 26 |           |           |           |           |           |           | R | 175.1190 | 88.0631  | 158.0924 | 79.5498  |          |          | 1 |

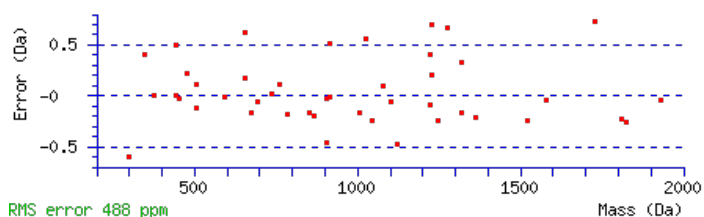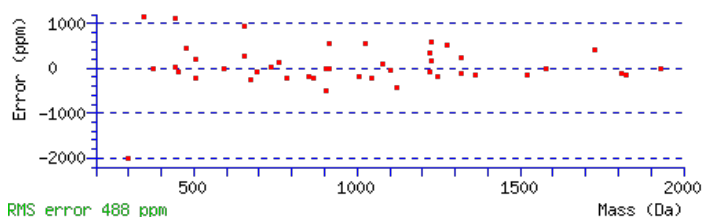

NCBI BLAST search of [ANLSSQALQMSLDYGFVTPLTSMSIR](#)  
 (Parameters: blastp, nr protein database, expect=20000, no filter, PAM30)  
 Other BLAST [web gateways](#)

All matches to this query

| Score | Mr(calc)  | Delta   | Sequence                                    | Site Analysis        |
|-------|-----------|---------|---------------------------------------------|----------------------|
| 70.8  | 2830.3881 | 0.0130  | <a href="#">ANLSSQALQMSLDYGFVTPLTSMSIR</a>  | Deamidated N2 85.56% |
| 62.7  | 2830.3881 | 0.0130  | <a href="#">ANLSSQALQMSLDYGFVTPLTSMSIR</a>  | Deamidated Q6 13.31% |
| 52.0  | 2830.3881 | 0.0130  | <a href="#">ANLSSQALQMSLDYGFVTPLTSMSIR</a>  | Deamidated Q9 1.13%  |
| 41.6  | 2829.4041 | 0.9970  | <a href="#">ANLSSQALQMSLDYGFVTPLTSMSIR</a>  |                      |
| 5.8   | 2829.3902 | 1.0108  | <a href="#">DETQMHFGTMGGLPTPTATLKRAPTR</a>  |                      |
| 3.9   | 2828.3936 | 2.0075  | <a href="#">EDPAGMEASTMPISALPRTSSDPVLLK</a> |                      |
| 3.3   | 2829.3888 | 1.0122  | <a href="#">MVLGMQLSQVSDLLTQEQANLTHQK</a>   |                      |
| 3.2   | 2830.4018 | -0.0008 | <a href="#">LTEMADQNTKGLLSEGNVAILQDNVR</a>  |                      |
| 3.2   | 2830.4018 | -0.0008 | <a href="#">LTEMADQNTKGLLSEGNVAILQDNVR</a>  |                      |
| 3.2   | 2828.3936 | 2.0075  | <a href="#">MMQLIKDVESSDLIGNRDTDYLK</a>     |                      |

Mascot: <http://www.matrixscience.com/>



# MATRIX SCIENCE Mascot Search Results

## Peptide View

MS/MS Fragmentation of **ICDLLVANNHFAHFFAPQNLTMNK**

Found in **F5H7E1** in **con\_Xuniprot\_HUMAN3**, F5H7E1\_HUMAN Inter-alpha-trypsin inhibitor heavy chain H1 OS=Homo sapiens GN=ITIHI PE=2 SV=1

Match to Query 26784: 2945.402982 from(982.808270,3+) intensity(55012.5664) rtinseconds(1979) scans(5170) index(2908)

Title: 111019\_Est\_ISCardio\_NMI\_YP\_G\_5Spectrum4376\_scans\_\_5170

Data file C:\mascot\20140703\_Tmgf\_1D\CSV\_UseAnalysis\MasterCSV\All\_Glyco\mgf\ptm\UC18ERLIC\_PTM\_35D.mgf

Click mouse within plot area to zoom in by factor of two about that point

Or, to Da

Label all possible matches Label matches used for scoring

Show Y-axis

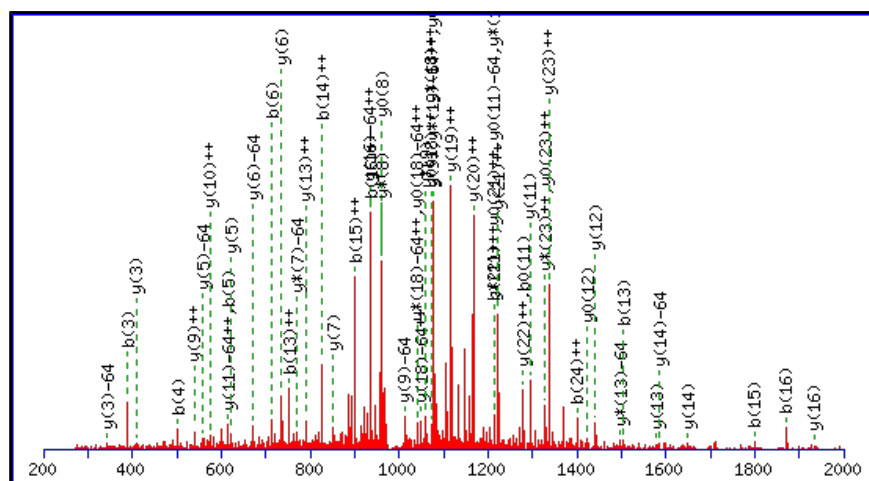

Monoisotopic mass of neutral peptide Mr(calc): 2945.3952

Fixed modifications: Carbamidomethyl (C) (apply to specified residues or termini only)

Variable modifications:

N19 : Deamidated (NQ)

M23 : Oxidation (M), with neutral losses 0.0000(shown in table), 63.9983

Ions Score: 52 Expect: 0.0016

Matches : 58/402 fragment ions using 87 most intense peaks ([help](#))

| #  | b                | b <sup>++</sup>  | b*        | b <sup>*++</sup> | b <sup>0</sup>   | b <sup>0++</sup> | Seq. | y                | y <sup>++</sup>  | y*               | y <sup>*++</sup> | y <sup>0</sup>   | y <sup>0++</sup> | #  |
|----|------------------|------------------|-----------|------------------|------------------|------------------|------|------------------|------------------|------------------|------------------|------------------|------------------|----|
| 1  | 114.0913         | 57.5493          |           |                  |                  |                  | I    |                  |                  |                  |                  |                  |                  | 25 |
| 2  | 274.1220         | 137.5646         |           |                  |                  |                  | C    | 2833.3185        | 1417.1629        | 2816.2919        | 1408.6496        | 2815.3079        | 1408.1576        | 24 |
| 3  | <b>389.1489</b>  | 195.0781         |           |                  | 371.1384         | 186.0728         | D    | 2673.2878        | <b>1337.1476</b> | 2656.2613        | <b>1328.6343</b> | 2655.2773        | <b>1328.1423</b> | 23 |
| 4  | <b>502.2330</b>  | 251.6201         |           |                  | 484.2224         | 242.6149         | L    | 2558.2609        | <b>1279.6341</b> | 2541.2343        | 1271.1208        | 2540.2503        | 1270.6288        | 22 |
| 5  | <b>615.3171</b>  | 308.1622         |           |                  | 597.3065         | 299.1569         | L    | 2445.1768        | <b>1223.0921</b> | 2428.1503        | <b>1214.5788</b> | 2427.1663        | <b>1214.0868</b> | 21 |
| 6  | <b>714.3855</b>  | 357.6964         |           |                  | 696.3749         | 348.6911         | V    | 2332.0928        | <b>1166.5500</b> | 2315.0662        | 1158.0367        | 2314.0822        | 1157.5447        | 20 |
| 7  | 785.4226         | 393.2149         |           |                  | 767.4120         | 384.2096         | A    | 2233.0243        | <b>1117.0158</b> | 2215.9978        | 1108.5025        | 2215.0138        | 1108.0105        | 19 |
| 8  | 899.4655         | 450.2364         | 882.4390  | 441.7231         | 881.4549         | 441.2311         | N    | 2161.9872        | 1081.4973        | 2144.9607        | <b>1072.9840</b> | 2143.9767        | <b>1072.4920</b> | 18 |
| 9  | 1013.5084        | 507.2579         | 996.4819  | 498.7446         | 995.4979         | 498.2526         | N    | 2047.9443        | 1024.4758        | 2030.9178        | 1015.9625        | 2029.9337        | 1015.4705        | 17 |
| 10 | 1150.5674        | 575.7873         | 1133.5408 | 567.2740         | 1132.5568        | 566.7820         | H    | <b>1933.9014</b> | 967.4543         | 1916.8748        | 958.9411         | 1915.8908        | 958.4490         | 16 |
| 11 | 1297.6358        | 649.3215         | 1280.6092 | 640.8082         | <b>1279.6252</b> | 640.3162         | F    | 1796.8425        | 898.9249         | 1779.8159        | 890.4116         | 1778.8319        | 889.9196         | 15 |
| 12 | 1368.6729        | 684.8401         | 1351.6463 | 676.3268         | 1350.6623        | 675.8348         | A    | <b>1649.7741</b> | 825.3907         | 1632.7475        | 816.8774         | 1631.7635        | 816.3854         | 14 |
| 13 | <b>1505.7318</b> | <b>753.3695</b>  | 1488.7052 | 744.8563         | 1487.7212        | 744.3643         | H    | <b>1578.7369</b> | <b>789.8721</b>  | 1561.7104        | 781.3588         | 1560.7264        | 780.8668         | 13 |
| 14 | 1652.8002        | <b>826.9037</b>  | 1635.7737 | 818.3905         | 1634.7896        | 817.8985         | F    | <b>1441.6780</b> | 721.3427         | 1424.6515        | 712.8294         | <b>1423.6675</b> | 712.3374         | 12 |
| 15 | <b>1799.8686</b> | <b>900.4379</b>  | 1782.8421 | 891.9247         | 1781.8581        | 891.4327         | F    | <b>1294.6096</b> | 647.8084         | 1277.5831        | 639.2952         | 1276.5990        | 638.8032         | 11 |
| 16 | <b>1870.9057</b> | <b>935.9565</b>  | 1853.8792 | 927.4432         | 1852.8952        | 926.9512         | A    | 1147.5412        | <b>574.2742</b>  | 1130.5147        | 565.7610         | 1129.5306        | 565.2690         | 10 |
| 17 | 1967.9585        | 984.4829         | 1950.9320 | 975.9696         | 1949.9479        | 975.4776         | P    | <b>1076.5041</b> | <b>538.7557</b>  | <b>1059.4775</b> | 530.2424         | 1058.4935        | 529.7504         | 9  |
| 18 | 2096.0171        | 1048.5122        | 2078.9905 | 1039.9989        | 2078.0065        | 1039.5069        | Q    | 979.4513         | 490.2293         | <b>962.4248</b>  | 481.7160         | <b>961.4408</b>  | 481.2240         | 8  |
| 19 | 2211.0440        | 1106.0256        | 2194.0175 | 1097.5124        | 2193.0335        | 1097.0204        | N    | <b>851.3927</b>  | 426.2000         | 834.3662         | 417.6867         | 833.3822         | 417.1947         | 7  |
| 20 | 2324.1281        | 1162.5677        | 2307.1015 | 1154.0544        | 2306.1175        | 1153.5624        | L    | <b>736.3658</b>  | 368.6865         | 719.3393         | 360.1733         | 718.3552         | 359.6813         | 6  |
| 21 | 2425.1758        | <b>1213.0915</b> | 2408.1492 | 1204.5782        | 2407.1652        | 1204.0862        | T    | <b>623.2817</b>  | 312.1445         | 606.2552         | 303.6312         | 605.2712         | 303.1392         | 5  |

|    |           |                  |           |           |           |           |   |                 |          |          |          |  |  |   |
|----|-----------|------------------|-----------|-----------|-----------|-----------|---|-----------------|----------|----------|----------|--|--|---|
| 22 | 2539.2187 | 1270.1130        | 2522.1921 | 1261.5997 | 2521.2081 | 1261.1077 | N | 522.2341        | 261.6207 | 505.2075 | 253.1074 |  |  | 4 |
| 23 | 2686.2541 | 1343.6307        | 2669.2275 | 1335.1174 | 2668.2435 | 1334.6254 | M | <b>408.1911</b> | 204.5992 | 391.1646 | 196.0859 |  |  | 3 |
| 24 | 2800.2970 | <b>1400.6521</b> | 2783.2705 | 1392.1389 | 2782.2865 | 1391.6469 | N | 261.1557        | 131.0815 | 244.1292 | 122.5682 |  |  | 2 |
| 25 |           |                  |           |           |           |           | K | 147.1128        | 74.0600  | 130.0863 | 65.5468  |  |  | 1 |

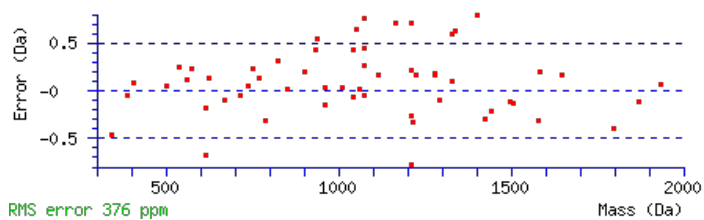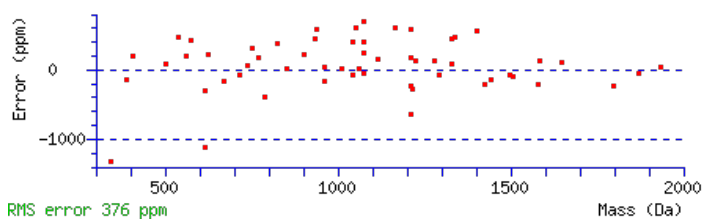

NCBI BLAST search of [ICDLLVANNHFAHFFAPQNLTMNK](#)  
 (Parameters: blastp, nr protein database, expect=20000, no filter, PAM30)  
 Other BLAST [web gateways](#)

All matches to this query

| Score | Mr(calc)  | Delta   | Sequence                                 | Site Analysis         |
|-------|-----------|---------|------------------------------------------|-----------------------|
| 52.1  | 2945.3952 | 0.0077  | <a href="#">ICDLLVANNHFAHFFAPQNLTMNK</a> | Deamidated N19 62.04% |
| 47.0  | 2945.3952 | 0.0077  | <a href="#">ICDLLVANNHFAHFFAPQNLTMNK</a> | Deamidated Q18 19.22% |
| 43.9  | 2945.3952 | 0.0077  | <a href="#">ICDLLVANNHFAHFFAPQNLTMNK</a> | Deamidated N22 9.33%  |
| 40.6  | 2945.3952 | 0.0077  | <a href="#">ICDLLVANNHFAHFFAPQNLTMNK</a> | Deamidated N9 4.39%   |
| 38.4  | 2945.3952 | 0.0077  | <a href="#">ICDLLVANNHFAHFFAPQNLTMNK</a> | Deamidated N8 2.63%   |
| 38.0  | 2945.3952 | 0.0077  | <a href="#">ICDLLVANNHFAHFFAPQNLTMNK</a> | Deamidated N24 2.39%  |
| 23.3  | 2944.4112 | 0.9917  | <a href="#">ICDLLVANNHFAHFFAPQNLTMNK</a> |                       |
| 8.4   | 2945.4125 | -0.0096 | <a href="#">LFVRNQVMSMAMWDGPYVNGILDK</a> |                       |
| 8.4   | 2945.4125 | -0.0096 | <a href="#">LFVRNQVMSMAMWDGPYVNGILDK</a> |                       |
| 3.9   | 2945.3885 | 0.0144  | <a href="#">ELTDNCVQLFDSTQKSLISCESKK</a> |                       |

Mascot: <http://www.matrixscience.com/>

# MASCOT SCIENCE Mascot Search Results

## Peptide View

MS/MS Fragmentation of **DKICDLLVANNHFAHFFAPQNLTMNK**

Found in **F5H7E1** in **con\_Xuniprot\_HUMAN3**, F5H7E1\_HUMAN Inter-alpha-trypsin inhibitor heavy chain H1 OS=Homo sapiens GN=ITI1H1 PE=2 SV=1

Match to Query 27362: 3188.531022 from(1063.850950,3+) intensity(0.0000) rtinseconds(2075) scans(5445) index(2965)

Title: 111019\_Est\_ISCardio\_NMI\_YP\_G\_5Spectrum4614\_scans\_5445

Data file C:\mascot\20140703\_Tmgf\_1D\CSV\_UseAnalysis\MasterCSV\All\_Glyco\mgf\ptm\UC18ERLIC\_PTM\_35D.mgf

Click mouse within plot area to zoom in by factor of two about that point

Or, to Da

Label all possible matches Label matches used for scoring

Show Y-axis

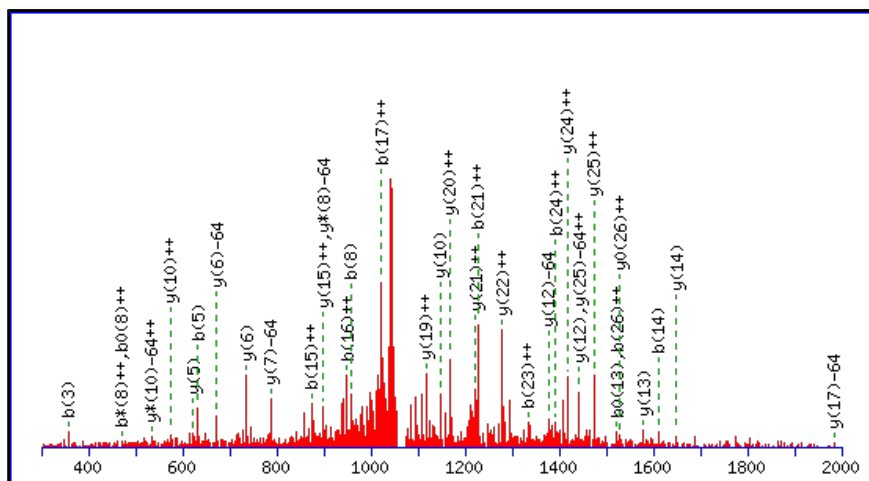

Monoisotopic mass of neutral peptide Mr(calc): 3188.5172

Fixed modifications: Carbamidomethyl (C) (apply to specified residues or termini only)

Variable modifications:

N21 : Deamidated (NQ)

M25 : Oxidation (M), with neutral losses 0.0000(shown in table), 63.9983

Ions Score: 52 Expect: 0.0018

Matches : 36/454 fragment ions using 51 most intense peaks ([help](#))

| #  | b                | b <sup>++</sup>  | b <sup>*</sup> | b <sup>*++</sup> | b <sup>0</sup>   | b <sup>0++</sup> | Seq. | y                | y <sup>++</sup>  | y <sup>*</sup> | y <sup>*++</sup> | y <sup>0</sup> | y <sup>0++</sup> | #  |
|----|------------------|------------------|----------------|------------------|------------------|------------------|------|------------------|------------------|----------------|------------------|----------------|------------------|----|
| 1  | 116.0342         | 58.5207          |                |                  | 98.0237          | 49.5155          | D    |                  |                  |                |                  |                |                  | 27 |
| 2  | 244.1292         | 122.5682         | 227.1026       | 114.0550         | 226.1186         | 113.5629         | K    | 3074.4975        | 1537.7524        | 3057.4710      | 1529.2391        | 3056.4869      | 1528.7471        | 26 |
| 3  | <b>357.2132</b>  | 179.1103         | 340.1867       | 170.5970         | 339.2027         | 170.1050         | I    | 2946.4025        | <b>1473.7049</b> | 2929.3760      | 1465.1916        | 2928.3920      | 1464.6996        | 25 |
| 4  | 517.2439         | 259.1256         | 500.2173       | 250.6123         | 499.2333         | 250.1203         | C    | 2833.3185        | <b>1417.1629</b> | 2816.2919      | 1408.6496        | 2815.3079      | 1408.1576        | 24 |
| 5  | <b>632.2708</b>  | 316.6391         | 615.2443       | 308.1258         | 614.2603         | 307.6338         | D    | 2673.2878        | 1337.1476        | 2656.2613      | 1328.6343        | 2655.2773      | 1328.1423        | 23 |
| 6  | 745.3549         | 373.1811         | 728.3284       | 364.6678         | 727.3443         | 364.1758         | L    | 2558.2609        | <b>1279.6341</b> | 2541.2343      | 1271.1208        | 2540.2503      | 1270.6288        | 22 |
| 7  | 858.4390         | 429.7231         | 841.4124       | 421.2098         | 840.4284         | 420.7178         | L    | 2445.1768        | <b>1223.0921</b> | 2428.1503      | 1214.5788        | 2427.1663      | 1214.0868        | 21 |
| 8  | <b>957.5074</b>  | 479.2573         | 940.4808       | <b>470.7441</b>  | 939.4968         | <b>470.2520</b>  | V    | 2332.0928        | <b>1166.5500</b> | 2315.0662      | 1158.0367        | 2314.0822      | 1157.5447        | 20 |
| 9  | 1028.5445        | 514.7759         | 1011.5179      | 506.2626         | 1010.5339        | 505.7706         | A    | 2233.0243        | <b>1117.0158</b> | 2215.9978      | 1108.5025        | 2215.0138      | 1108.0105        | 19 |
| 10 | 1142.5874        | 571.7973         | 1125.5609      | 563.2841         | 1124.5769        | 562.7921         | N    | 2161.9872        | 1081.4973        | 2144.9607      | 1072.9840        | 2143.9767      | 1072.4920        | 18 |
| 11 | 1256.6303        | 628.8188         | 1239.6038      | 620.3055         | 1238.6198        | 619.8135         | N    | 2047.9443        | 1024.4758        | 2030.9178      | 1015.9625        | 2029.9337      | 1015.4705        | 17 |
| 12 | 1393.6893        | 697.3483         | 1376.6627      | 688.8350         | 1375.6787        | 688.3430         | H    | 1933.9014        | 967.4543         | 1916.8748      | 958.9411         | 1915.8908      | 958.4490         | 16 |
| 13 | 1540.7577        | 770.8825         | 1523.7311      | 762.3692         | <b>1522.7471</b> | 761.8772         | F    | 1796.8425        | <b>898.9249</b>  | 1779.8159      | 890.4116         | 1778.8319      | 889.9196         | 15 |
| 14 | <b>1611.7948</b> | 806.4010         | 1594.7682      | 797.8878         | 1593.7842        | 797.3957         | A    | <b>1649.7741</b> | 825.3907         | 1632.7475      | 816.8774         | 1631.7635      | 816.3854         | 14 |
| 15 | 1748.8537        | <b>874.9305</b>  | 1731.8272      | 866.4172         | 1730.8431        | 865.9252         | H    | <b>1578.7369</b> | 789.8721         | 1561.7104      | 781.3588         | 1560.7264      | 780.8668         | 13 |
| 16 | 1895.9221        | <b>948.4647</b>  | 1878.8956      | 939.9514         | 1877.9115        | 939.4594         | F    | <b>1441.6780</b> | 721.3427         | 1424.6515      | 712.8294         | 1423.6675      | 712.3374         | 12 |
| 17 | 2042.9905        | <b>1021.9989</b> | 2025.9640      | 1013.4856        | 2024.9800        | 1012.9936        | F    | 1294.6096        | 647.8084         | 1277.5831      | 639.2952         | 1276.5990      | 638.8032         | 11 |
| 18 | 2114.0276        | 1057.5175        | 2097.0011      | 1049.0042        | 2096.0171        | 1048.5122        | A    | <b>1147.5412</b> | <b>574.2742</b>  | 1130.5147      | 565.7610         | 1129.5306      | 565.2690         | 10 |
| 19 | 2211.0804        | 1106.0438        | 2194.0539      | 1097.5306        | 2193.0698        | 1097.0386        | P    | 1076.5041        | 538.7557         | 1059.4775      | 530.2424         | 1058.4935      | 529.7504         | 9  |
| 20 | 2339.1390        | 1170.0731        | 2322.1124      | 1161.5599        | 2321.1284        | 1161.0678        | Q    | 979.4513         | 490.2293         | 962.4248       | 481.7160         | 961.4408       | 481.2240         | 8  |
| 21 | 2454.1659        | <b>1227.5866</b> | 2437.1394      | 1219.0733        | 2436.1554        | 1218.5813        | N    | 851.3927         | 426.2000         | 834.3662       | 417.6867         | 833.3822       | 417.1947         | 7  |

|    |           |           |           |           |           |           |   |          |          |          |          |          |          |   |
|----|-----------|-----------|-----------|-----------|-----------|-----------|---|----------|----------|----------|----------|----------|----------|---|
| 22 | 2567.2500 | 1284.1286 | 2550.2234 | 1275.6154 | 2549.2394 | 1275.1234 | L | 736.3658 | 368.6865 | 719.3393 | 360.1733 | 718.3552 | 359.6813 | 6 |
| 23 | 2668.2977 | 1334.6525 | 2651.2711 | 1326.1392 | 2650.2871 | 1325.6472 | T | 623.2817 | 312.1445 | 606.2552 | 303.6312 | 605.2712 | 303.1392 | 5 |
| 24 | 2782.3406 | 1391.6739 | 2765.3140 | 1383.1607 | 2764.3300 | 1382.6687 | N | 522.2341 | 261.6207 | 505.2075 | 253.1074 |          |          | 4 |
| 25 | 2929.3760 | 1465.1916 | 2912.3494 | 1456.6784 | 2911.3654 | 1456.1864 | M | 408.1911 | 204.5992 | 391.1646 | 196.0859 |          |          | 3 |
| 26 | 3043.4189 | 1522.2131 | 3026.3924 | 1513.6998 | 3025.4084 | 1513.2078 | N | 261.1557 | 131.0815 | 244.1292 | 122.5682 |          |          | 2 |
| 27 |           |           |           |           |           |           | K | 147.1128 | 74.0600  | 130.0863 | 65.5468  |          |          | 1 |

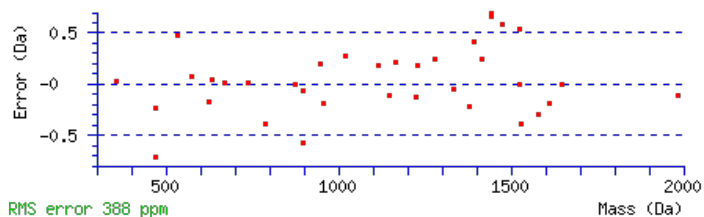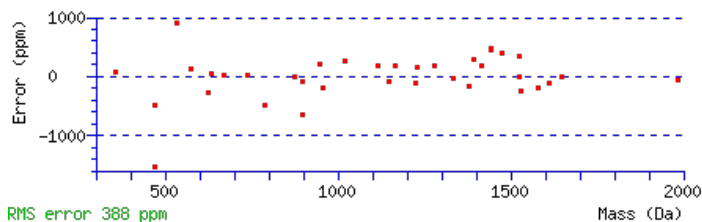

NCBI BLAST search of [DKICDLLVANNHEAHEFFAPQNLTNMNK](#)  
 (Parameters: blastp, nr protein database, expect=20000, no filter, PAM30)  
 Other BLAST [web gateways](#)

All matches to this query

| Score | Mr(calc)  | Delta  | Sequence                                     | Site Analysis         |
|-------|-----------|--------|----------------------------------------------|-----------------------|
| 51.5  | 3188.5172 | 0.0139 | <a href="#">DKICDLLVANNHEAHEFFAPQNLTNMNK</a> | Deamidated N21 43.21% |
| 50.1  | 3188.5172 | 0.0139 | <a href="#">DKICDLLVANNHEAHEFFAPQNLTNMNK</a> | Deamidated Q20 30.94% |
| 45.6  | 3188.5172 | 0.0139 | <a href="#">DKICDLLVANNHEAHEFFAPQNLTNMNK</a> | Deamidated N24 11.03% |
| 43.4  | 3188.5172 | 0.0139 | <a href="#">DKICDLLVANNHEAHEFFAPQNLTNMNK</a> | Deamidated N11 6.68%  |
| 42.1  | 3188.5172 | 0.0139 | <a href="#">DKICDLLVANNHEAHEFFAPQNLTNMNK</a> | Deamidated N10 4.94%  |
| 40.3  | 3188.5172 | 0.0139 | <a href="#">DKICDLLVANNHEAHEFFAPQNLTNMNK</a> | Deamidated N26 3.20%  |
| 24.6  | 3187.5331 | 0.9979 | <a href="#">DKICDLLVANNHEAHEFFAPQNLTNMNK</a> |                       |
| 3.4   | 3188.5291 | 0.0019 | <a href="#">LDVLSNDLVNMMLKSSFATCVLYSEEDK</a> |                       |
| 3.0   | 3187.5246 | 1.0064 | <a href="#">NPFLDFLQKGLMISLSTDDPMQHFHTK</a>  |                       |
| 3.0   | 3187.5246 | 1.0064 | <a href="#">NPFLDFLQKGLMISLSTDDPMQHFHTK</a>  |                       |

Mascot: <http://www.matrixscience.com/>

# MATRIX SCIENCE Mascot Search Results

## Peptide View

MS/MS Fragmentation of **VVSSVLQFGNISFK**

Found in **F8W6L6** in **con\_Xuniprot\_HUMAN3**, F8W6L6\_HUMAN Myosin-10 OS=Homo sapiens GN=MYH10 PE=2 SV=1

Match to Query 6892: 1525.801928 from(763.908240,2+) intensity(22561.4336) rtinseconds(1593) scans(4113) index(6459)

Title: 111019\_Est\_ISCardio\_NMI\_YP\_G\_9Spectrum3616\_scans\_\_4113

Data file C:\\mascot\\20140703\_Tmgf\_1D\\CSV\_UseAnalysis\\MasterCSV\\All\_Glyco\\mgf\\ptm\\UC18ERLIC\_PTM\_35D.mgf

Click mouse within plot area to zoom in by factor of two about that point

Or, to Da

Label all possible matches Label matches used for scoring

Show Y-axis

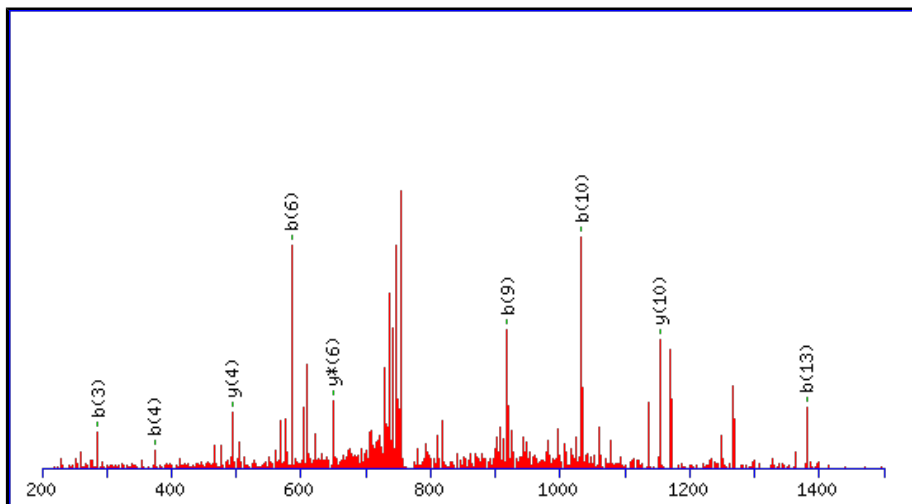

**Monoisotopic mass of neutral peptide Mr(calc):** 1525.8028

**Fixed modifications:** Carbamidomethyl (C) (apply to specified residues or termini only)

**Variable modifications:**

Q7 : Deamidated (NQ)

N10 : Deamidated (NQ)

**Ions Score:** 42 **Expect:** 0.011

**Matches :** 9/136 fragment ions using 13 most intense peaks ([help](#))

| #  | b                | b <sup>++</sup> | b*        | b <sup>+++</sup> | b <sup>0</sup> | b <sup>0++</sup> | Seq. | y                | y <sup>++</sup> | y*              | y <sup>+++</sup> | y <sup>0</sup> | y <sup>0++</sup> | #  |
|----|------------------|-----------------|-----------|------------------|----------------|------------------|------|------------------|-----------------|-----------------|------------------|----------------|------------------|----|
| 1  | 100.0757         | 50.5415         |           |                  |                |                  | V    |                  |                 |                 |                  |                |                  | 14 |
| 2  | 199.1441         | 100.0757        |           |                  |                |                  | V    | 1427.7417        | 714.3745        | 1410.7151       | 705.8612         | 1409.7311      | 705.3692         | 13 |
| 3  | <b>286.1761</b>  | 143.5917        |           |                  | 268.1656       | 134.5864         | S    | 1328.6733        | 664.8403        | 1311.6467       | 656.3270         | 1310.6627      | 655.8350         | 12 |
| 4  | <b>373.2082</b>  | 187.1077        |           |                  | 355.1976       | 178.1024         | S    | 1241.6412        | 621.3243        | 1224.6147       | 612.8110         | 1223.6307      | 612.3190         | 11 |
| 5  | 472.2766         | 236.6419        |           |                  | 454.2660       | 227.6366         | V    | <b>1154.6092</b> | 577.8082        | 1137.5827       | 569.2950         | 1136.5986      | 568.8030         | 10 |
| 6  | <b>585.3606</b>  | 293.1840        |           |                  | 567.3501       | 284.1787         | L    | 1055.5408        | 528.2740        | 1038.5142       | 519.7608         | 1037.5302      | 519.2688         | 9  |
| 7  | 714.4032         | 357.7053        | 697.3767  | 349.1920         | 696.3927       | 348.7000         | Q    | 942.4567         | 471.7320        | 925.4302        | 463.2187         | 924.4462       | 462.7267         | 8  |
| 8  | 861.4716         | 431.2395        | 844.4451  | 422.7262         | 843.4611       | 422.2342         | F    | 813.4141         | 407.2107        | 796.3876        | 398.6974         | 795.4036       | 398.2054         | 7  |
| 9  | <b>918.4931</b>  | 459.7502        | 901.4666  | 451.2369         | 900.4825       | 450.7449         | G    | 666.3457         | 333.6765        | <b>649.3192</b> | 325.1632         | 648.3352       | 324.6712         | 6  |
| 10 | <b>1033.5201</b> | 517.2637        | 1016.4935 | 508.7504         | 1015.5095      | 508.2584         | N    | 609.3243         | 305.1658        | 592.2977        | 296.6525         | 591.3137       | 296.1605         | 5  |
| 11 | 1146.6041        | 573.8057        | 1129.5776 | 565.2924         | 1128.5936      | 564.8004         | I    | <b>494.2973</b>  | 247.6523        | 477.2708        | 239.1390         | 476.2867       | 238.6470         | 4  |
| 12 | 1233.6361        | 617.3217        | 1216.6096 | 608.8084         | 1215.6256      | 608.3164         | S    | 381.2132         | 191.1103        | 364.1867        | 182.5970         | 363.2027       | 182.1050         | 3  |
| 13 | <b>1380.7046</b> | 690.8559        | 1363.6780 | 682.3426         | 1362.6940      | 681.8506         | F    | 294.1812         | 147.5942        | 277.1547        | 139.0810         |                |                  | 2  |
| 14 |                  |                 |           |                  |                |                  | K    | 147.1128         | 74.0600         | 130.0863        | 65.5468          |                |                  | 1  |

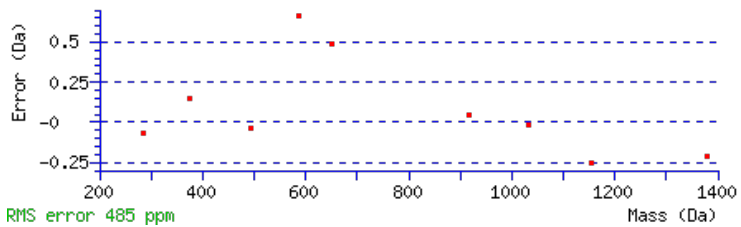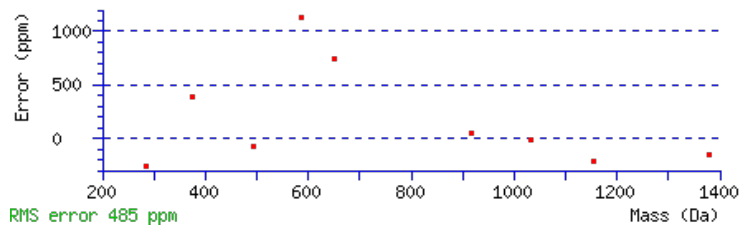

NCBI **BLAST** search of [VVSSVLQFGNISEFK](#)

(Parameters: blastp, nr protein database, expect=20000, no filter, PAM30)

Other BLAST [web gateways](#)

**All matches to this query**

| Score | Mr(calc)  | Delta   | Sequence                        |
|-------|-----------|---------|---------------------------------|
| 42.4  | 1525.8028 | -0.0009 | <a href="#">VVSSVLQFGNISEFK</a> |
| 10.9  | 1525.8028 | -0.0008 | <a href="#">NQYFQLKTELLK</a>    |
| 10.9  | 1525.8028 | -0.0008 | <a href="#">NQYFQLKTELLK</a>    |
| 10.9  | 1525.8028 | -0.0008 | <a href="#">NQYFQLKTELLK</a>    |
| 8.6   | 1524.8048 | 0.9971  | <a href="#">TNRIYRIFEQ GK</a>   |
| 6.4   | 1525.8035 | -0.0015 | <a href="#">DLMHRQIRSOIK</a>    |
| 6.2   | 1525.7988 | 0.0032  | <a href="#">IPQDRPTSEELLK</a>   |
| 6.1   | 1524.8049 | 0.9971  | <a href="#">KFDHVNIKGNPEK</a>   |
| 4.6   | 1525.8062 | -0.0043 | <a href="#">FTLLTVSSGITEMK</a>  |
| 4.4   | 1525.8035 | -0.0015 | <a href="#">SLRNLMAAHSADLK</a>  |

Mascot: <http://www.matrixscience.com/>

# MASCOT SCIENCE Mascot Search Results

## Peptide View

MS/MS Fragmentation of **DQCIYDDITYNVNDTFHK**

Found in **F8W7G7** in **con\_Xuniprot\_HUMAN3**, F8W7G7\_HUMAN Ugl-Y3 OS=Homo sapiens GN=FN1 PE=2 SV=1

Match to Query 14862: 2196.972488 from(1099.493520,2+) intensity(16723.5469) rtinseconds(1855) scans(4799) index(18690)

Title: 111019\_Est\_ML\_YP\_G\_08Spectrum4175\_scans\_\_4799

Data file C:\mascot\20140703\_Tmgf\_1D\CSV\_UseAnalysis\MasterCSV\All\_Glyco\mgf\ptm\UC18ERLIC\_PTM\_35D.mgf

Click mouse within plot area to zoom in by factor of two about that point

Or,  to  Da

Label all possible matches  Label matches used for scoring

Show Y-axis

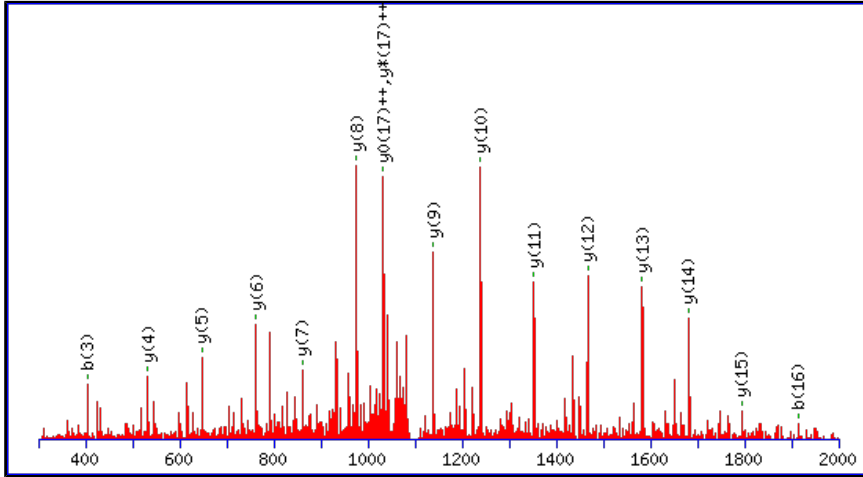

Monoisotopic mass of neutral peptide Mr(calc): 2196.9634

Fixed modifications: Carbamidomethyl (C) (apply to specified residues or termini only)

Variable modifications:

N13 : Deamidated (NQ)

Ions Score: 111 Expect: 8.9e-010

Matches : 16/196 fragment ions using 17 most intense peaks ([help](#))

| #  | b         | b <sup>++</sup> | b*        | b <sup>*++</sup> | b <sup>0</sup> | b <sup>0++</sup> | Seq. | y         | y <sup>++</sup> | y*        | y <sup>*++</sup> | y <sup>0</sup> | y <sup>0++</sup> | #  |
|----|-----------|-----------------|-----------|------------------|----------------|------------------|------|-----------|-----------------|-----------|------------------|----------------|------------------|----|
| 1  | 116.0342  | 58.5207         |           |                  | 98.0237        | 49.5155          | D    |           |                 |           |                  |                |                  | 18 |
| 2  | 244.0928  | 122.5500        | 227.0662  | 114.0368         | 226.0822       | 113.5448         | Q    | 2082.9437 | 1041.9755       | 2065.9171 | 1033.4622        | 2064.9331      | 1032.9702        | 17 |
| 3  | 404.1234  | 202.5654        | 387.0969  | 194.0521         | 386.1129       | 193.5601         | C    | 1954.8851 | 977.9462        | 1937.8586 | 969.4329         | 1936.8746      | 968.9409         | 16 |
| 4  | 517.2075  | 259.1074        | 500.1810  | 250.5941         | 499.1969       | 250.1021         | I    | 1794.8545 | 897.9309        | 1777.8279 | 889.4176         | 1776.8439      | 888.9256         | 15 |
| 5  | 616.2759  | 308.6416        | 599.2494  | 300.1283         | 598.2654       | 299.6363         | V    | 1681.7704 | 841.3888        | 1664.7439 | 832.8756         | 1663.7598      | 832.3836         | 14 |
| 6  | 731.3029  | 366.1551        | 714.2763  | 357.6418         | 713.2923       | 357.1498         | D    | 1582.7020 | 791.8546        | 1565.6754 | 783.3414         | 1564.6914      | 782.8494         | 13 |
| 7  | 846.3298  | 423.6685        | 829.3033  | 415.1553         | 828.3192       | 414.6633         | D    | 1467.6751 | 734.3412        | 1450.6485 | 725.8279         | 1449.6645      | 725.3359         | 12 |
| 8  | 959.4139  | 480.2106        | 942.3873  | 471.6973         | 941.4033       | 471.2053         | I    | 1352.6481 | 676.8277        | 1335.6216 | 668.3144         | 1334.6375      | 667.8224         | 11 |
| 9  | 1060.4616 | 530.7344        | 1043.4350 | 522.2211         | 1042.4510      | 521.7291         | T    | 1239.5640 | 620.2857        | 1222.5375 | 611.7724         | 1221.5535      | 611.2804         | 10 |
| 10 | 1223.5249 | 612.2661        | 1206.4983 | 603.7528         | 1205.5143      | 603.2608         | Y    | 1138.5164 | 569.7618        | 1121.4898 | 561.2485         | 1120.5058      | 560.7565         | 9  |
| 11 | 1337.5678 | 669.2875        | 1320.5413 | 660.7743         | 1319.5572      | 660.2823         | N    | 975.4530  | 488.2302        | 958.4265  | 479.7169         | 957.4425       | 479.2249         | 8  |
| 12 | 1436.6362 | 718.8217        | 1419.6097 | 710.3085         | 1418.6257      | 709.8165         | V    | 861.4101  | 431.2087        | 844.3836  | 422.6954         | 843.3995       | 422.2034         | 7  |
| 13 | 1551.6632 | 776.3352        | 1534.6366 | 767.8219         | 1533.6526      | 767.3299         | N    | 762.3417  | 381.6745        | 745.3151  | 373.1612         | 744.3311       | 372.6692         | 6  |
| 14 | 1666.6901 | 833.8487        | 1649.6636 | 825.3354         | 1648.6795      | 824.8434         | D    | 647.3148  | 324.1610        | 630.2882  | 315.6477         | 629.3042       | 315.1557         | 5  |
| 15 | 1767.7378 | 884.3725        | 1750.7112 | 875.8593         | 1749.7272      | 875.3672         | T    | 532.2878  | 266.6475        | 515.2613  | 258.1343         | 514.2772       | 257.6423         | 4  |
| 16 | 1914.8062 | 957.9067        | 1897.7797 | 949.3935         | 1896.7956      | 948.9015         | F    | 431.2401  | 216.1237        | 414.2136  | 207.6104         |                |                  | 3  |
| 17 | 2051.8651 | 1026.4362       | 2034.8386 | 1017.9229        | 2033.8545      | 1017.4309        | H    | 284.1717  | 142.5895        | 267.1452  | 134.0762         |                |                  | 2  |
| 18 |           |                 |           |                  |                |                  | K    | 147.1128  | 74.0600         | 130.0863  | 65.5468          |                |                  | 1  |



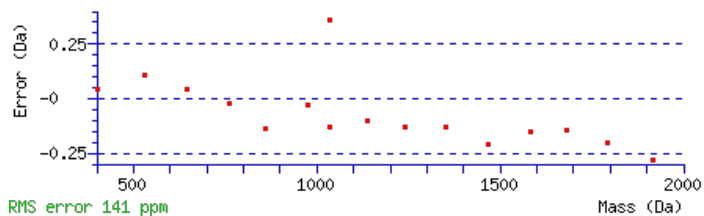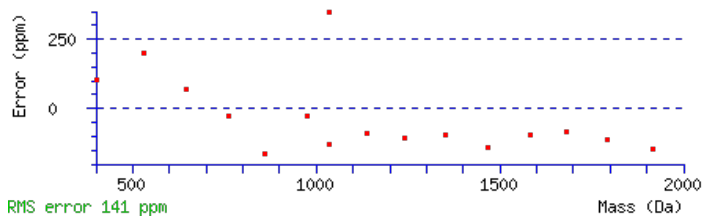

NCBI BLAST search of [DQCIVDDITYNVNDTFHK](#)

(Parameters: blastp, nr protein database, expect=20000, no filter, PAM30)

Other BLAST [web gateways](#)

All matches to this query

| Score | Mr(calc)  | Delta  | Sequence                             | Site Analysis         |
|-------|-----------|--------|--------------------------------------|-----------------------|
| 111.0 | 2196.9634 | 0.0091 | <a href="#">DQCIVDDITYNVNDTFHK</a>   | Deamidated N13 99.96% |
| 77.0  | 2196.9634 | 0.0091 | <a href="#">DQCIVDDITYNVNDTFHK</a>   | Deamidated N11 0.04%  |
| 22.1  | 2195.9794 | 0.9931 | <a href="#">DQCIVDDITYNVNDTFHK</a>   |                       |
| 7.2   | 2194.9735 | 1.9990 | <a href="#">NNSNLWMSSMPGINNVTGAR</a> |                       |
| 6.4   | 2194.9735 | 1.9990 | <a href="#">NNSNLWMSSMPGINNVTGAR</a> |                       |
| 6.4   | 2194.9735 | 1.9990 | <a href="#">NNSNLWMSSMPGINNVTGAR</a> |                       |
| 1.7   | 2196.9634 | 0.0091 | <a href="#">DQCIVDDITYNVNDTFHK</a>   | Deamidated Q2 0.00%   |

Mascot: <http://www.matrixscience.com/>

# MATRIX SCIENCE Mascot Search Results

## Peptide View

MS/MS Fragmentation of **DQCIYDDITYNVNDTFHKR**

Found in **F8W7G7** in **con\_Xuniprot\_HUMAN3**, F8W7G7\_HUMAN Ugl-Y3 OS=Homo sapiens GN=FN1 PE=2 SV=1

Match to Query 17813: 2353.071496 from(589.275150,4+) intensity(26748.7793) rtinseconds(2051) scans(4876) index(16873)

Title: 111019\_Est\_ML\_YP\_G\_06Spectrum4037\_scans\_\_4876

Data file C:\mascot\20140703\_Tmgf\_1D\CSV\_UseAnalysis\MasterCSV\All\_Glyco\mgf\ptm\UC18ERLIC\_PTM\_35D.mgf

Click mouse within plot area to zoom in by factor of two about that point

Or, to Da

Label all possible matches Label matches used for scoring

Show Y-axis

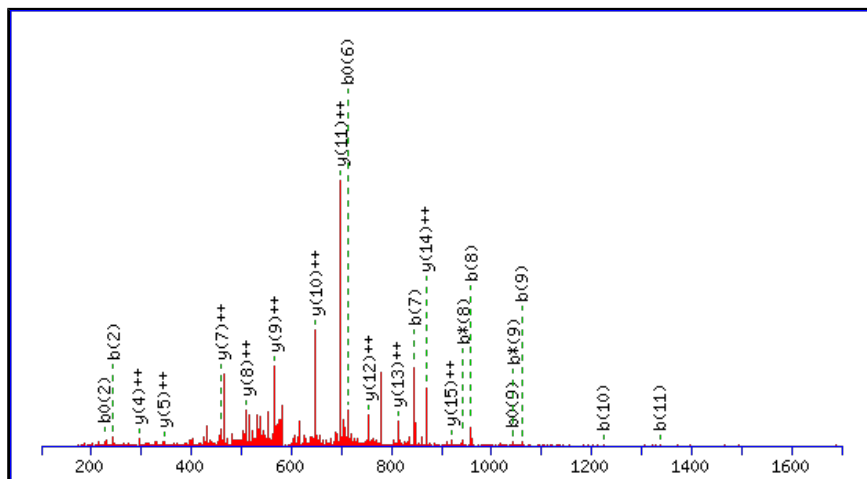

Monoisotopic mass of neutral peptide Mr(calc): 2353.0645

Fixed modifications: Carbamidomethyl (C) (apply to specified residues or termini only)

Variable modifications:

N13 : Deamidated (NQ)

Ions Score: 51 Expect: 0.0013

Matches : 22/206 fragment ions using 52 most intense peaks ([help](#))

| #  | b                | b <sup>++</sup> | b <sup>*</sup>   | b <sup>*++</sup> | b <sup>0</sup>   | b <sup>0++</sup> | Seq. | y         | y <sup>++</sup> | y <sup>*</sup> | y <sup>*++</sup> | y <sup>0</sup> | y <sup>0++</sup> | #  |
|----|------------------|-----------------|------------------|------------------|------------------|------------------|------|-----------|-----------------|----------------|------------------|----------------|------------------|----|
| 1  | 116.0342         | 58.5207         |                  |                  | 98.0237          | 49.5155          | D    |           |                 |                |                  |                |                  | 19 |
| 2  | <b>244.0928</b>  | 122.5500        | 227.0662         | 114.0368         | <b>226.0822</b>  | 113.5448         | Q    | 2239.0448 | 1120.0260       | 2222.0183      | 1111.5128        | 2221.0342      | 1111.0208        | 18 |
| 3  | 404.1234         | 202.5654        | 387.0969         | 194.0521         | 386.1129         | 193.5601         | C    | 2110.9862 | 1055.9968       | 2093.9597      | 1047.4835        | 2092.9757      | 1046.9915        | 17 |
| 4  | 517.2075         | 259.1074        | 500.1810         | 250.5941         | 499.1969         | 250.1021         | I    | 1950.9556 | 975.9814        | 1933.9290      | 967.4682         | 1932.9450      | 966.9761         | 16 |
| 5  | 616.2759         | 308.6416        | 599.2494         | 300.1283         | 598.2654         | 299.6363         | V    | 1837.8715 | <b>919.4394</b> | 1820.8450      | 910.9261         | 1819.8610      | 910.4341         | 15 |
| 6  | 731.3029         | 366.1551        | 714.2763         | 357.6418         | <b>713.2923</b>  | 357.1498         | D    | 1738.8031 | <b>869.9052</b> | 1721.7766      | 861.3919         | 1720.7925      | 860.8999         | 14 |
| 7  | <b>846.3298</b>  | 423.6685        | 829.3033         | 415.1553         | 828.3192         | 414.6633         | D    | 1623.7762 | <b>812.3917</b> | 1606.7496      | 803.8784         | 1605.7656      | 803.3864         | 13 |
| 8  | <b>959.4139</b>  | 480.2106        | <b>942.3873</b>  | 471.6973         | 941.4033         | 471.2053         | I    | 1508.7492 | <b>754.8782</b> | 1491.7227      | 746.3650         | 1490.7387      | 745.8730         | 12 |
| 9  | <b>1060.4616</b> | 530.7344        | <b>1043.4350</b> | 522.2211         | <b>1042.4510</b> | 521.7291         | T    | 1395.6652 | <b>698.3362</b> | 1378.6386      | 689.8229         | 1377.6546      | 689.3309         | 11 |
| 10 | <b>1223.5249</b> | 612.2661        | 1206.4983        | 603.7528         | 1205.5143        | 603.2608         | Y    | 1294.6175 | <b>647.8124</b> | 1277.5909      | 639.2991         | 1276.6069      | 638.8071         | 10 |
| 11 | <b>1337.5678</b> | 669.2875        | 1320.5413        | 660.7743         | 1319.5572        | 660.2823         | N    | 1131.5541 | <b>566.2807</b> | 1114.5276      | 557.7674         | 1113.5436      | 557.2754         | 9  |
| 12 | 1436.6362        | 718.8217        | 1419.6097        | 710.3085         | 1418.6257        | 709.8165         | V    | 1017.5112 | <b>509.2592</b> | 1000.4847      | 500.7460         | 999.5007       | 500.2540         | 8  |
| 13 | 1551.6632        | 776.3352        | 1534.6366        | 767.8219         | 1533.6526        | 767.3299         | N    | 918.4428  | <b>459.7250</b> | 901.4163       | 451.2118         | 900.4322       | 450.7198         | 7  |
| 14 | 1666.6901        | 833.8487        | 1649.6636        | 825.3354         | 1648.6795        | 824.8434         | D    | 803.4159  | 402.2116        | 786.3893       | 393.6983         | 785.4053       | 393.2063         | 6  |
| 15 | 1767.7378        | 884.3725        | 1750.7112        | 875.8593         | 1749.7272        | 875.3672         | T    | 688.3889  | <b>344.6981</b> | 671.3624       | 336.1848         | 670.3784       | 335.6928         | 5  |
| 16 | 1914.8062        | 957.9067        | 1897.7797        | 949.3935         | 1896.7956        | 948.9015         | F    | 587.3412  | <b>294.1743</b> | 570.3147       | 285.6610         |                |                  | 4  |
| 17 | 2051.8651        | 1026.4362       | 2034.8386        | 1017.9229        | 2033.8545        | 1017.4309        | H    | 440.2728  | 220.6401        | 423.2463       | 212.1268         |                |                  | 3  |
| 18 | 2179.9601        | 1090.4837       | 2162.9335        | 1081.9704        | 2161.9495        | 1081.4784        | K    | 303.2139  | 152.1106        | 286.1874       | 143.5973         |                |                  | 2  |
| 19 |                  |                 |                  |                  |                  |                  | R    | 175.1190  | 88.0631         | 158.0924       | 79.5498          |                |                  | 1  |

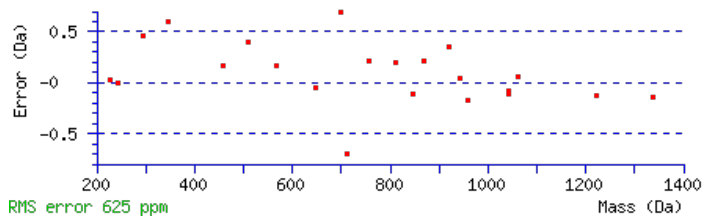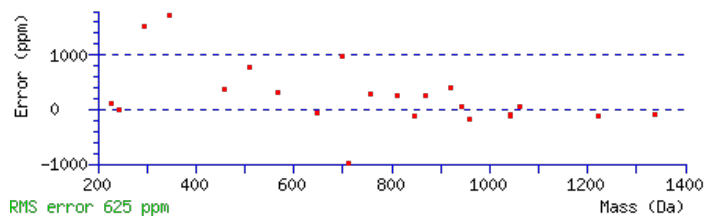

NCBI BLAST search of [DQCIVDDITYNVNDTFHKR](#)

(Parameters: blastp, nr protein database, expect=20000, no filter, PAM30)

Other BLAST [web gateways](#)

**All matches to this query**

| Score | Mr(calc)  | Delta   | Sequence                                  | Site Analysis         |
|-------|-----------|---------|-------------------------------------------|-----------------------|
| 51.1  | 2353.0645 | 0.0070  | <a href="#">DQCIVDDITYNVNDTFHKR</a>       | Deamidated N13 92.17% |
| 40.4  | 2353.0645 | 0.0070  | <a href="#">DQCIVDDITYNVNDTFHKR</a>       | Deamidated N11 7.81%  |
| 14.8  | 2353.0645 | 0.0070  | <a href="#">DQCIVDDITYNVNDTFHKR</a>       | Deamidated Q2 0.02%   |
| 12.5  | 2352.0724 | 0.9991  | <a href="#">LEGECRSNNATSTASSNLGASAR</a>   |                       |
| 10.5  | 2353.0719 | -0.0004 | <a href="#">GIQHVYEDMSSPMDENVVLR</a>      |                       |
| 5.8   | 2351.0661 | 2.0054  | <a href="#">ENTTKMELYKVQNEFSMNK</a>       |                       |
| 5.3   | 2351.0661 | 2.0054  | <a href="#">ENTTKMELYKVQNEFSMNK</a>       |                       |
| 4.8   | 2351.0706 | 2.0009  | <a href="#">LASKNEPSISDSYNYPNYDR</a>      |                       |
| 4.6   | 2353.0604 | 0.0111  | <a href="#">QPAPAAPQGQASTSPQGAGEGRASM</a> |                       |
| 4.6   | 2353.0604 | 0.0111  | <a href="#">QPAPAAPQGQASTSPQGAGEGRASM</a> |                       |

Mascot: <http://www.matrixscience.com/>

# MATRIX SCIENCE Mascot Search Results

## Peptide View

MS/MS Fragmentation of **FGYILHTDNR**

Found in **C9JMA2** in **con\_Xuniprot\_HUMAN3**, C9JMA2\_HUMAN Mannan-binding lectin serine protease 1 heavy chain (Fragment)  
 OS=Homo sapiens GN=MASP1 PE=2 SV=1

Match to Query 1737: 1235.59548 from(618.805050,2+) intensity(49297.7539) rtinseconds(781) scans(1742) index(2515)

Title: 111019\_Est\_ISCardio\_NMI\_YP\_G\_5Spectrum1473\_scans\_\_1742

Data file C:\mascot\20140703\_Tmgf\_1D\CSV\_UseAnalysis\MasterCSV\All\_Glyco\mgf\ptm\UC18ERLIC\_PTM\_35D.mgf

Click mouse within plot area to zoom in by factor of two about that point

Or, to Da

Label all possible matches Label matches used for scoring

Show Y-axis

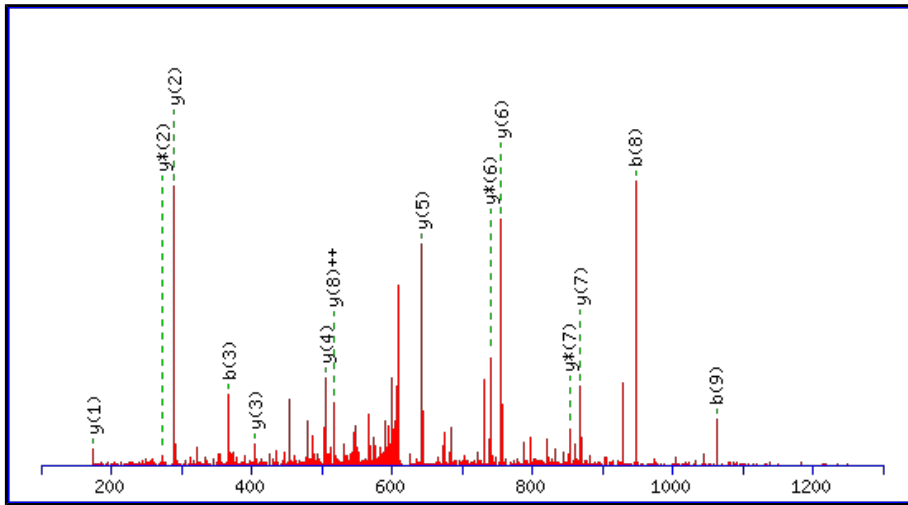

Monoisotopic mass of neutral peptide  $M_r(\text{calc})$ : 1235.5935

Fixed modifications: Carbamidomethyl (C) (apply to specified residues or termini only)

Variable modifications:

N9 : Deamidated (NQ)

Ions Score: 48 Expect: 0.0034

Matches : 14/76 fragment ions using 22 most intense peaks ([help](#))

| #  | b                | b <sup>++</sup> | b <sup>*</sup> | b <sup>***</sup> | b <sup>0</sup> | b <sup>0++</sup> | Seq.     | y               | y <sup>++</sup> | y <sup>*</sup>  | y <sup>***</sup> | y <sup>0</sup> | y <sup>0++</sup> | #         |
|----|------------------|-----------------|----------------|------------------|----------------|------------------|----------|-----------------|-----------------|-----------------|------------------|----------------|------------------|-----------|
| 1  | 148.0757         | 74.5415         |                |                  |                |                  | <b>F</b> |                 |                 |                 |                  |                |                  | <b>10</b> |
| 2  | 205.0972         | 103.0522        |                |                  |                |                  | <b>G</b> | 1089.5324       | 545.2698        | 1072.5058       | 536.7565         | 1071.5218      | 536.2645         | <b>9</b>  |
| 3  | <b>368.1605</b>  | 184.5839        |                |                  |                |                  | <b>Y</b> | 1032.5109       | <b>516.7591</b> | 1015.4843       | 508.2458         | 1014.5003      | 507.7538         | <b>8</b>  |
| 4  | 481.2445         | 241.1259        |                |                  |                |                  | <b>I</b> | <b>869.4476</b> | 435.2274        | <b>852.4210</b> | 426.7141         | 851.4370       | 426.2221         | <b>7</b>  |
| 5  | 594.3286         | 297.6679        |                |                  |                |                  | <b>L</b> | <b>756.3635</b> | 378.6854        | <b>739.3369</b> | 370.1721         | 738.3529       | 369.6801         | <b>6</b>  |
| 6  | 731.3875         | 366.1974        |                |                  |                |                  | <b>H</b> | <b>643.2794</b> | 322.1434        | 626.2529        | 313.6301         | 625.2689       | 313.1381         | <b>5</b>  |
| 7  | 832.4352         | 416.7212        |                |                  | 814.4246       | 407.7160         | <b>T</b> | <b>506.2205</b> | 253.6139        | 489.1940        | 245.1006         | 488.2100       | 244.6086         | <b>4</b>  |
| 8  | <b>947.4621</b>  | 474.2347        |                |                  | 929.4516       | 465.2294         | <b>D</b> | <b>405.1728</b> | 203.0901        | 388.1463        | 194.5768         | 387.1623       | 194.0848         | <b>3</b>  |
| 9  | <b>1062.4891</b> | 531.7482        | 1045.4625      | 523.2349         | 1044.4785      | 522.7429         | <b>N</b> | <b>290.1459</b> | 145.5766        | <b>273.1193</b> | 137.0633         |                |                  | <b>2</b>  |
| 10 |                  |                 |                |                  |                |                  | <b>R</b> | <b>175.1190</b> | 88.0631         | 158.0924        | 79.5498          |                |                  | <b>1</b>  |

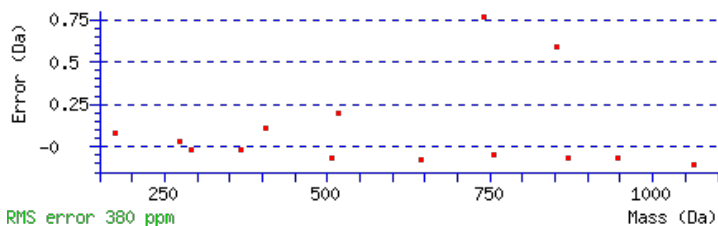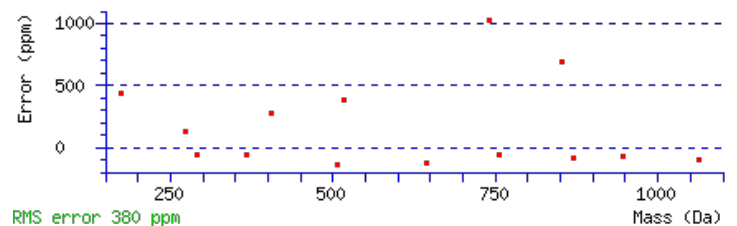

NCBI BLAST search of **FGYILHTDNR**

(Parameters: blastp, nr protein database, expect=20000, no filter, PAM30)

Other BLAST [web gateways](#)

**All matches to this query**

| Score | Mr(calc)  | Delta   | Sequence                     |
|-------|-----------|---------|------------------------------|
| 48.1  | 1235.5935 | 0.0021  | <a href="#">FGYILHTDNR</a>   |
| 12.7  | 1235.5894 | 0.0061  | <a href="#">GQYRAVSSPDR</a>  |
| 7.9   | 1235.5894 | 0.0061  | <a href="#">ARNLQAQYDR</a>   |
| 7.9   | 1235.5894 | 0.0061  | <a href="#">ARNLQAQYDR</a>   |
| 7.9   | 1235.5894 | 0.0061  | <a href="#">ARNLQAQYDR</a>   |
| 7.5   | 1235.5894 | 0.0061  | <a href="#">VEEHLQPNDR</a>   |
| 6.3   | 1234.5976 | 0.9980  | <a href="#">GNVISCVTNSGK</a> |
| 5.0   | 1235.5993 | -0.0038 | <a href="#">GNVTSLSLSSNR</a> |
| 4.7   | 1235.5928 | 0.0027  | <a href="#">TRTTEMNLNR</a>   |
| 4.6   | 1235.6007 | -0.0051 | <a href="#">DHGLQAPRADR</a>  |

**Mascot:** <http://www.matrixscience.com/>

# MATRIX SCIENCE Mascot Search Results

## Peptide View

MS/MS Fragmentation of **FGYILHTDNRTC**R

Found in **C9JMA2** in **con\_Xuniprot\_HUMAN3**, C9JMA2\_HUMAN Mannan-binding lectin serine protease 1 heavy chain (Fragment)

OS=Homo sapiens GN=MASP1 PE=2 SV=1

Match to Query 8408: 1652.775522 from(551.932450,3+) intensity(15448.3613) rtinseconds(650) scans(1394) index(1176)

Title: 111019\_Est\_ISCardio\_NMI\_YP\_G\_3Spectrum1179\_scans\_\_1394

Data file C:\mascot\20140703\_Tmgf\_1D\CSV\_UseAnalysis\MasterCSV\All\_Glyco\mgf\ptm\UC18ERLIC\_PTM\_35D.mgf

Click mouse within plot area to zoom in by factor of two about that point

Or, to Da

Label all possible matches Label matches used for scoring

Show Y-axis

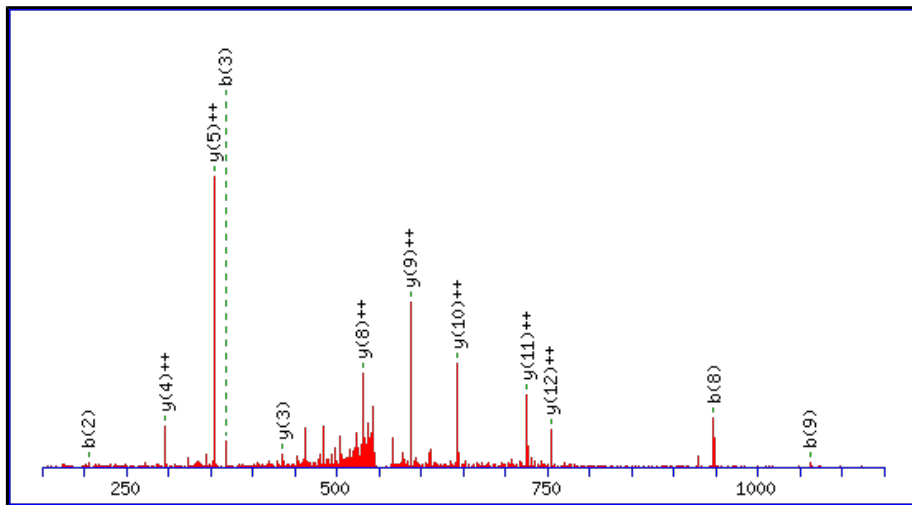

Monoisotopic mass of neutral peptide Mr(calc): 1652.7729

Fixed modifications: Carbamidomethyl (C) (apply to specified residues or termini only)

Variable modifications:

N9 : Deamidated (NQ)

Ions Score: 41 Expect: 0.015

Matches : 12/112 fragment ions using 20 most intense peaks ([help](#))

| #  | b                | b <sup>++</sup> | b <sup>*</sup> | b <sup>+++</sup> | b <sup>0</sup> | b <sup>0++</sup> | Seq. | y               | y <sup>++</sup> | y <sup>*</sup> | y <sup>+++</sup> | y <sup>0</sup> | y <sup>0++</sup> | #  |
|----|------------------|-----------------|----------------|------------------|----------------|------------------|------|-----------------|-----------------|----------------|------------------|----------------|------------------|----|
| 1  | 148.0757         | 74.5415         |                |                  |                |                  | F    |                 |                 |                |                  |                |                  | 13 |
| 2  | <b>205.0972</b>  | 103.0522        |                |                  |                |                  | G    | 1506.7118       | <b>753.8595</b> | 1489.6852      | 745.3463         | 1488.7012      | 744.8542         | 12 |
| 3  | <b>368.1605</b>  | 184.5839        |                |                  |                |                  | Y    | 1449.6903       | <b>725.3488</b> | 1432.6638      | 716.8355         | 1431.6798      | 716.3435         | 11 |
| 4  | 481.2445         | 241.1259        |                |                  |                |                  | I    | 1286.6270       | <b>643.8171</b> | 1269.6004      | 635.3039         | 1268.6164      | 634.8119         | 10 |
| 5  | 594.3286         | 297.6679        |                |                  |                |                  | L    | 1173.5429       | <b>587.2751</b> | 1156.5164      | 578.7618         | 1155.5324      | 578.2698         | 9  |
| 6  | 731.3875         | 366.1974        |                |                  |                |                  | H    | 1060.4589       | <b>530.7331</b> | 1043.4323      | 522.2198         | 1042.4483      | 521.7278         | 8  |
| 7  | 832.4352         | 416.7212        |                |                  | 814.4246       | 407.7160         | T    | 923.4000        | 462.2036        | 906.3734       | 453.6903         | 905.3894       | 453.1983         | 7  |
| 8  | <b>947.4621</b>  | 474.2347        |                |                  | 929.4516       | 465.2294         | D    | 822.3523        | 411.6798        | 805.3257       | 403.1665         | 804.3417       | 402.6745         | 6  |
| 9  | <b>1062.4891</b> | 531.7482        | 1045.4625      | 523.2349         | 1044.4785      | 522.7429         | N    | 707.3253        | <b>354.1663</b> | 690.2988       | 345.6530         | 689.3148       | 345.1610         | 5  |
| 10 | 1218.5902        | 609.7987        | 1201.5637      | 601.2855         | 1200.5796      | 600.7935         | R    | 592.2984        | <b>296.6528</b> | 575.2718       | 288.1396         | 574.2878       | 287.6476         | 4  |
| 11 | 1319.6379        | 660.3226        | 1302.6113      | 651.8093         | 1301.6273      | 651.3173         | T    | <b>436.1973</b> | 218.6023        | 419.1707       | 210.0890         | 418.1867       | 209.5970         | 3  |
| 12 | 1479.6685        | 740.3379        | 1462.6420      | 731.8246         | 1461.6580      | 731.3326         | C    | 335.1496        | 168.0784        | 318.1231       | 159.5652         |                |                  | 2  |
| 13 |                  |                 |                |                  |                |                  | R    | 175.1190        | 88.0631         | 158.0924       | 79.5498          |                |                  | 1  |

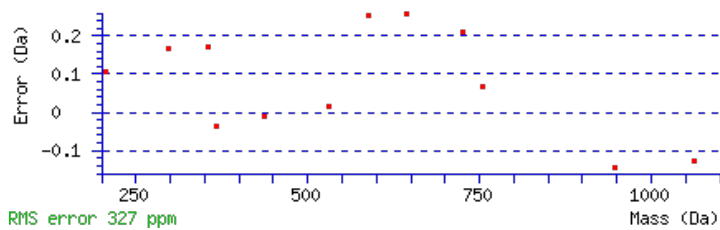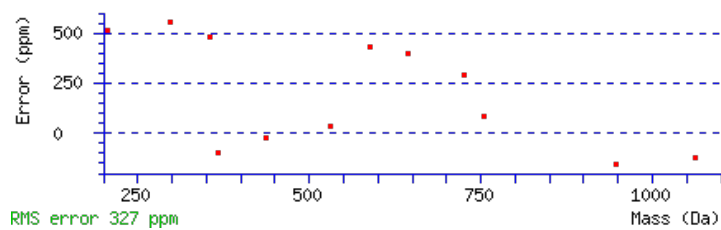

NCBI **BLAST** search of [FGYILHTDNRTCR](#)

(Parameters: blastp, nr protein database, expect=20000, no filter, PAM30)

Other BLAST [web gateways](#)

**All matches to this query**

| Score | Mr(calc)  | Delta   | Sequence                          |
|-------|-----------|---------|-----------------------------------|
| 41.4  | 1652.7729 | 0.0026  | <a href="#">FGYILHTDNRTCR</a>     |
| 13.2  | 1652.7835 | -0.0080 | <a href="#">LEFDSNTPYGVFHK</a>    |
| 9.4   | 1650.7607 | 2.0149  | <a href="#">THLPGAQAAPCPSCGK</a>  |
| 8.1   | 1651.7689 | 1.0066  | <a href="#">TEDDATKTPNNEAK</a>    |
| 6.7   | 1652.7836 | -0.0081 | <a href="#">SPMMNNKYKMIHK</a>     |
| 6.1   | 1651.7763 | 0.9992  | <a href="#">QEPCETDSLGLLYK</a>    |
| 5.0   | 1650.7705 | 2.0050  | <a href="#">GSVTANMLCAGLESGGK</a> |
| 4.0   | 1651.7689 | 1.0066  | <a href="#">DEFSEKKEQAEQGK</a>    |
| 3.9   | 1652.7763 | -0.0008 | <a href="#">NIMIHHLOGDAMNK</a>    |
| 3.6   | 1651.7763 | 0.9992  | <a href="#">QIKCLEELGDNFGK</a>    |

Mascot: <http://www.matrixscience.com/>



# MATRIX SCIENCE Mascot Search Results

## Peptide View

MS/MS Fragmentation of **NCGVNCSGDVFTALIGEIASPNYPKYPENSR**

Found in **F5H7T4** in **con\_Xuniprot\_HUMAN3**, F5H7T4\_HUMAN Complement C1s subcomponent (Fragment) OS=Homo sapiens GN=C1S PE=2 SV=1

Match to Query 27796: 3526.618896 from(882.662000,4+) intensity(53783.2070) rtinseconds(2541) scans(6619) index(2290)

Title: 111019\_Est\_ISCardio\_NMI\_YP\_G\_4Spectrum5763\_scans\_6619

Data file C:\mascot\20140703\_Tmgf\_1D\CSV\_UseAnalysis\MasterCSV\All\_Glyco\mgf\ptm\UC18ERLIC\_PTM\_35D.mgf

Click mouse within plot area to zoom in by factor of two about that point

Or, to Da

Label all possible matches Label matches used for scoring

Show Y-axis

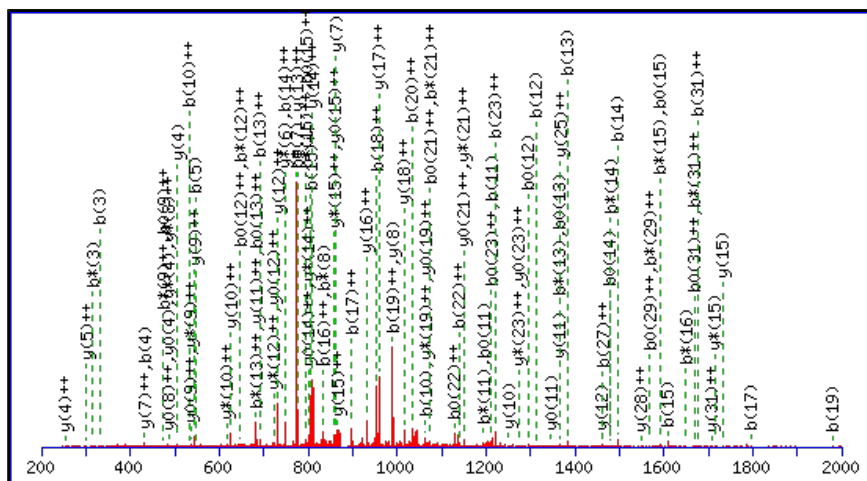

Monoisotopic mass of neutral peptide Mr(calc): 3526.6133

Fixed modifications: Carbamidomethyl (C) (apply to specified residues or termini only)

Variable modifications:

N5 : Deamidated (NQ)

Ions Score: 65 Expect: 5.6e-005

Matches : 99/358 fragment ions using 170 most intense peaks ([help](#))

| #  | b         | b <sup>++</sup> | b <sup>*</sup> | b <sup>**</sup> | b <sup>0</sup> | b <sup>0++</sup> | Seq. | y         | y <sup>++</sup> | y <sup>*</sup> | y <sup>**</sup> | y <sup>0</sup> | y <sup>0++</sup> | #  |
|----|-----------|-----------------|----------------|-----------------|----------------|------------------|------|-----------|-----------------|----------------|-----------------|----------------|------------------|----|
| 1  | 115.0502  | 58.0287         | 98.0237        | 49.5155         |                |                  | N    |           |                 |                |                 |                |                  | 32 |
| 2  | 275.0809  | 138.0441        | 258.0543       | 129.5308        |                |                  | C    | 3413.5777 | 1707.2925       | 3396.5511      | 1698.7792       | 3395.5671      | 1698.2872        | 31 |
| 3  | 332.1023  | 166.5548        | 315.0758       | 158.0415        |                |                  | G    | 3253.5470 | 1627.2771       | 3236.5205      | 1618.7639       | 3235.5365      | 1618.2719        | 30 |
| 4  | 431.1707  | 216.0890        | 414.1442       | 207.5757        |                |                  | V    | 3196.5256 | 1598.7664       | 3179.4990      | 1590.2531       | 3178.5150      | 1589.7611        | 29 |
| 5  | 546.1977  | 273.6025        | 529.1711       | 265.0892        |                |                  | N    | 3097.4571 | 1549.2322       | 3080.4306      | 1540.7189       | 3079.4466      | 1540.2269        | 28 |
| 6  | 706.2283  | 353.6178        | 689.2018       | 345.1045        |                |                  | C    | 2982.4302 | 1491.7187       | 2965.4037      | 1483.2055       | 2964.4196      | 1482.7135        | 27 |
| 7  | 793.2604  | 397.1338        | 776.2338       | 388.6205        | 775.2498       | 388.1285         | S    | 2822.3996 | 1411.7034       | 2805.3730      | 1403.1901       | 2804.3890      | 1402.6981        | 26 |
| 8  | 850.2818  | 425.6445        | 833.2553       | 417.1313        | 832.2712       | 416.6393         | G    | 2735.3675 | 1368.1874       | 2718.3410      | 1359.6741       | 2717.3570      | 1359.1821        | 25 |
| 9  | 965.3088  | 483.1580        | 948.2822       | 474.6447        | 947.2982       | 474.1527         | D    | 2678.3461 | 1339.6767       | 2661.3195      | 1331.1634       | 2660.3355      | 1330.6714        | 24 |
| 10 | 1064.3772 | 532.6922        | 1047.3506      | 524.1789        | 1046.3666      | 523.6869         | V    | 2563.3191 | 1282.1632       | 2546.2926      | 1273.6499       | 2545.3086      | 1273.1579        | 23 |
| 11 | 1211.4456 | 606.2264        | 1194.4190      | 597.7132        | 1193.4350      | 597.2211         | F    | 2464.2507 | 1232.6290       | 2447.2242      | 1224.1157       | 2446.2401      | 1223.6237        | 22 |
| 12 | 1312.4933 | 656.7503        | 1295.4667      | 648.2370        | 1294.4827      | 647.7450         | T    | 2317.1823 | 1159.0948       | 2300.1557      | 1150.5815       | 2299.1717      | 1150.0895        | 21 |
| 13 | 1383.5304 | 692.2688        | 1366.5038      | 683.7556        | 1365.5198      | 683.2635         | A    | 2216.1346 | 1108.5709       | 2199.1081      | 1100.0577       | 2198.1240      | 1099.5657        | 20 |
| 14 | 1496.6144 | 748.8109        | 1479.5879      | 740.2976        | 1478.6039      | 739.8056         | L    | 2145.0975 | 1073.0524       | 2128.0709      | 1064.5391       | 2127.0869      | 1064.0471        | 19 |
| 15 | 1609.6985 | 805.3529        | 1592.6720      | 796.8396        | 1591.6879      | 796.3476         | I    | 2032.0134 | 1016.5104       | 2014.9869      | 1007.9971       | 2014.0029      | 1007.5051        | 18 |
| 16 | 1666.7200 | 833.8636        | 1649.6934      | 825.3503        | 1648.7094      | 824.8583         | G    | 1918.9294 | 959.9683        | 1901.9028      | 951.4550        | 1900.9188      | 950.9630         | 17 |
| 17 | 1795.7626 | 898.3849        | 1778.7360      | 889.8716        | 1777.7520      | 889.3796         | E    | 1861.9079 | 931.4576        | 1844.8814      | 922.9443        | 1843.8973      | 922.4523         | 16 |
| 18 | 1908.8466 | 954.9270        | 1891.8201      | 946.4137        | 1890.8361      | 945.9217         | I    | 1732.8653 | 866.9363        | 1715.8388      | 858.4230        | 1714.8547      | 857.9310         | 15 |
| 19 | 1979.8837 | 990.4455        | 1962.8572      | 981.9322        | 1961.8732      | 981.4402         | A    | 1619.7812 | 810.3943        | 1602.7547      | 801.8810        | 1601.7707      | 801.3890         | 14 |
| 20 | 2066.9158 | 1033.9615       | 2049.8892      | 1025.4482       | 2048.9052      | 1024.9562        | S    | 1548.7441 | 774.8757        | 1531.7176      | 766.3624        | 1530.7336      | 765.8704         | 13 |
| 21 | 2163.9685 | 1082.4879       | 2146.9420      | 1073.9746       | 2145.9580      | 1073.4826        | P    | 1461.7121 | 731.3597        | 1444.6856      | 722.8464        | 1443.7015      | 722.3544         | 12 |
| 22 | 2278.0115 | 1139.5094       | 2260.9849      | 1130.9961       | 2260.0009      | 1130.5041        | N    | 1364.6593 | 682.8333        | 1347.6328      | 674.3200        | 1346.6488      | 673.8280         | 11 |

|    |           |                  |           |                  |           |                  |          |                  |                 |                 |                 |                 |                 |           |
|----|-----------|------------------|-----------|------------------|-----------|------------------|----------|------------------|-----------------|-----------------|-----------------|-----------------|-----------------|-----------|
| 23 | 2441.0748 | <b>1221.0410</b> | 2424.0482 | 1212.5278        | 2423.0642 | <b>1212.0357</b> | <b>Y</b> | <b>1250.6164</b> | <b>625.8118</b> | 1233.5899       | <b>617.2986</b> | 1232.6058       | 616.8066        | <b>10</b> |
| 24 | 2538.1276 | 1269.5674        | 2521.1010 | 1261.0541        | 2520.1170 | 1260.5621        | <b>P</b> | 1087.5531        | <b>544.2802</b> | 1070.5265       | <b>535.7669</b> | 1069.5425       | <b>535.2749</b> | <b>9</b>  |
| 25 | 2666.2225 | 1333.6149        | 2649.1960 | 1325.1016        | 2648.2120 | 1324.6096        | <b>K</b> | <b>990.5003</b>  | 495.7538        | 973.4738        | <b>487.2405</b> | 972.4898        | <b>486.7485</b> | <b>8</b>  |
| 26 | 2763.2753 | 1382.1413        | 2746.2487 | 1373.6280        | 2745.2647 | 1373.1360        | <b>P</b> | <b>862.4054</b>  | <b>431.7063</b> | 845.3788        | 423.1930        | 844.3948        | 422.7010        | <b>7</b>  |
| 27 | 2926.3386 | <b>1463.6729</b> | 2909.3121 | 1455.1597        | 2908.3280 | 1454.6677        | <b>Y</b> | 765.3526         | 383.1799        | <b>748.3260</b> | 374.6667        | 747.3420        | 374.1747        | <b>6</b>  |
| 28 | 3023.3914 | 1512.1993        | 3006.3648 | 1503.6860        | 3005.3808 | 1503.1940        | <b>P</b> | 602.2893         | <b>301.6483</b> | 585.2627        | 293.1350        | 584.2787        | 292.6430        | <b>5</b>  |
| 29 | 3152.4340 | 1576.7206        | 3135.4074 | <b>1568.2073</b> | 3134.4234 | <b>1567.7153</b> | <b>E</b> | <b>505.2365</b>  | <b>253.1219</b> | <b>488.2100</b> | 244.6086        | <b>487.2259</b> | 244.1166        | <b>4</b>  |
| 30 | 3266.4769 | 1633.7421        | 3249.4503 | 1625.2288        | 3248.4663 | 1624.7368        | <b>N</b> | 376.1939         | 188.6006        | 359.1674        | 180.0873        | 358.1833        | 179.5953        | <b>3</b>  |
| 31 | 3353.5089 | <b>1677.2581</b> | 3336.4824 | <b>1668.7448</b> | 3335.4984 | <b>1668.2528</b> | <b>S</b> | 262.1510         | 131.5791        | 245.1244        | 123.0659        | 244.1404        | 122.5738        | <b>2</b>  |
| 32 |           |                  |           |                  |           |                  | <b>R</b> | 175.1190         | 88.0631         | 158.0924        | 79.5498         |                 |                 | <b>1</b>  |

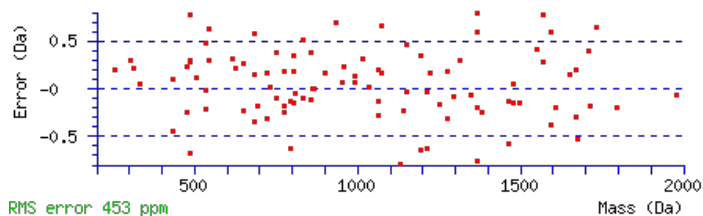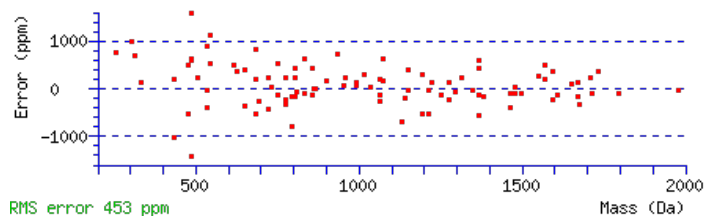

NCBI **BLAST** search of [NCGVNCSGDVFTALIGEIASPNYPKYPENS](#)R

(Parameters: blastp, nr protein database, expect=20000, no filter, PAM30)

Other BLAST [web gateways](#)

**All matches to this query**

| Score | Mr(calc)  | Delta   | Sequence                                           | Site Analysis        |
|-------|-----------|---------|----------------------------------------------------|----------------------|
| 65.4  | 3526.6133 | 0.0056  | <a href="#">NCGVNCSGDVFTALIGEIASPNYPKYPENS</a> R   | Deamidated N5 82.59% |
| 55.9  | 3526.6133 | 0.0056  | <a href="#">NCGVNCSGDVFTALIGEIASPNYPKYPENS</a> R   | Deamidated N1 9.42%  |
| 53.5  | 3526.6133 | 0.0056  | <a href="#">NCGVNCSGDVFTALIGEIASPNYPKYPENS</a> R   | Deamidated N22 5.41% |
| 50.3  | 3526.6133 | 0.0056  | <a href="#">NCGVNCSGDVFTALIGEIASPNYPKYPENS</a> R   | Deamidated N30 2.58% |
| 45.0  | 3525.6293 | 0.9896  | <a href="#">NCGVNCSGDVFTALIGEIASPNYPKYPENS</a> R   |                      |
| 5.9   | 3526.6245 | -0.0056 | <a href="#">EITLPTANVSVQVSAPWNTNMQRDEHHYCK</a>     |                      |
| 5.9   | 3526.6245 | -0.0056 | <a href="#">EITLPTANVSVQVSAPWNTNMQRDEHHYCK</a>     |                      |
| 5.9   | 3526.6245 | -0.0056 | <a href="#">EITLPTANVSVQVSAPWNTNMQRDEHHYCK</a>     |                      |
| 5.9   | 3526.6245 | -0.0056 | <a href="#">EITLPTANVSVQVSAPWNTNMQRDEHHYCK</a>     |                      |
| 3.4   | 3524.6222 | 1.9967  | <a href="#">NGKMLGPTSQPSCPDPDLSLEPGQTGEGMVGPIR</a> |                      |

Mascot: <http://www.matrixscience.com/>

# MASCOT SCIENCE Mascot Search Results

## Peptide View

MS/MS Fragmentation of **YTCEEPYYMENGGGGEYHCAGNGSWVNEVLGPELPK**

Found in **F8WCZ6** in **con\_Xuniprot\_HUMAN3**, F8WCZ6\_HUMAN Complement C1s subcomponent OS=Homo sapiens GN=C1S PE=2 SV=1

Match to Query 28983: 4227.757016 from(1057.946530,4+) intensity(18869.6113) rtinseconds(2214) scans(5800) index(19835)

Title: 111019\_Est\_MI\_YP\_G\_09Spectrum5127\_scans\_\_5800

Data file C:\mascot\20140703\_Tmgf\_1D\CSV\_UseAnalysis\MasterCSV\All\_Glyco\mgf\ptm\UC18ERLIC\_PTM\_35D.mgf

Click mouse within plot area to zoom in by factor of two about that point

Or, to Da

Label all possible matches Label matches used for scoring

Show Y-axis

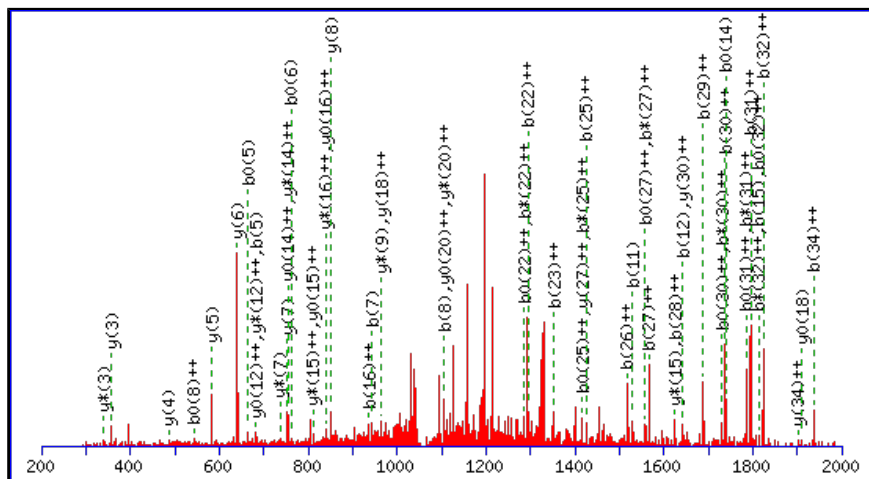

Monoisotopic mass of neutral peptide Mr(calc): 4227.7448

Fixed modifications: Carbamidomethyl (C) (apply to specified residues or termini only)

Variable modifications:

N23 : Deamidated (NQ)

N28 : Deamidated (NQ)

Ions Score: 37 Expect: 0.0045

Matches : 59/402 fragment ions using 102 most intense peaks ([help](#))

| #  | b         | b <sup>++</sup> | b <sup>*</sup> | b <sup>*++</sup> | b <sup>0</sup> | b <sup>0++</sup> | Seq. | y         | y <sup>++</sup> | y <sup>*</sup> | y <sup>*++</sup> | y <sup>0</sup> | y <sup>0++</sup> | #  |
|----|-----------|-----------------|----------------|------------------|----------------|------------------|------|-----------|-----------------|----------------|------------------|----------------|------------------|----|
| 1  | 164.0706  | 82.5389         |                |                  |                |                  | Y    |           |                 |                |                  |                |                  | 37 |
| 2  | 265.1183  | 133.0628        |                |                  | 247.1077       | 124.0575         | T    | 4065.6888 | 2033.3480       | 4048.6623      | 2024.8348        | 4047.6783      | 2024.3428        | 36 |
| 3  | 425.1489  | 213.0781        |                |                  | 407.1384       | 204.0728         | C    | 3964.6411 | 1982.8242       | 3947.6146      | 1974.3109        | 3946.6306      | 1973.8189        | 35 |
| 4  | 554.1915  | 277.5994        |                |                  | 536.1810       | 268.5941         | E    | 3804.6105 | 1902.8089       | 3787.5839      | 1894.2956        | 3786.5999      | 1893.8036        | 34 |
| 5  | 683.2341  | 342.1207        |                |                  | 665.2236       | 333.1154         | E    | 3675.5679 | 1838.2876       | 3658.5413      | 1829.7743        | 3657.5573      | 1829.2823        | 33 |
| 6  | 780.2869  | 390.6471        |                |                  | 762.2763       | 381.6418         | P    | 3546.5253 | 1773.7663       | 3529.4988      | 1765.2530        | 3528.5147      | 1764.7610        | 32 |
| 7  | 943.3502  | 472.1787        |                |                  | 925.3396       | 463.1735         | Y    | 3449.4725 | 1725.2399       | 3432.4460      | 1716.7266        | 3431.4620      | 1716.2346        | 31 |
| 8  | 1106.4135 | 553.7104        |                |                  | 1088.4030      | 544.7051         | Y    | 3286.4092 | 1643.7082       | 3269.3827      | 1635.1950        | 3268.3986      | 1634.7030        | 30 |
| 9  | 1269.4769 | 635.2421        |                |                  | 1251.4663      | 626.2368         | Y    | 3123.3459 | 1562.1766       | 3106.3193      | 1553.6633        | 3105.3353      | 1553.1713        | 29 |
| 10 | 1400.5174 | 700.7623        |                |                  | 1382.5068      | 691.7570         | M    | 2960.2826 | 1480.6449       | 2943.2560      | 1472.1316        | 2942.2720      | 1471.6396        | 28 |
| 11 | 1529.5599 | 765.2836        |                |                  | 1511.5494      | 756.2783         | E    | 2829.2421 | 1415.1247       | 2812.2155      | 1406.6114        | 2811.2315      | 1406.1194        | 27 |
| 12 | 1643.6029 | 822.3051        | 1626.5763      | 813.7918         | 1625.5923      | 813.2998         | N    | 2700.1995 | 1350.6034       | 2683.1729      | 1342.0901        | 2682.1889      | 1341.5981        | 26 |
| 13 | 1700.6243 | 850.8158        | 1683.5978      | 842.3025         | 1682.6138      | 841.8105         | G    | 2586.1565 | 1293.5819       | 2569.1300      | 1285.0686        | 2568.1460      | 1284.5766        | 25 |
| 14 | 1757.6458 | 879.3265        | 1740.6193      | 870.8133         | 1739.6352      | 870.3213         | G    | 2529.1351 | 1265.0712       | 2512.1085      | 1256.5579        | 2511.1245      | 1256.0659        | 24 |
| 15 | 1814.6673 | 907.8373        | 1797.6407      | 899.3240         | 1796.6567      | 898.8320         | G    | 2472.1136 | 1236.5604       | 2455.0871      | 1228.0472        | 2454.1031      | 1227.5552        | 23 |
| 16 | 1871.6887 | 936.3480        | 1854.6622      | 927.8347         | 1853.6782      | 927.3427         | G    | 2415.0922 | 1208.0497       | 2398.0656      | 1199.5364        | 2397.0816      | 1199.0444        | 22 |
| 17 | 2000.7313 | 1000.8693       | 1983.7048      | 992.3560         | 1982.7208      | 991.8640         | E    | 2358.0707 | 1179.5390       | 2341.0441      | 1171.0257        | 2340.0601      | 1170.5337        | 21 |
| 18 | 2163.7947 | 1082.4010       | 2146.7681      | 1073.8877        | 2145.7841      | 1073.3957        | Y    | 2229.0281 | 1115.0177       | 2212.0015      | 1106.5044        | 2211.0175      | 1106.0124        | 20 |
| 19 | 2300.8536 | 1150.9304       | 2283.8270      | 1142.4171        | 2282.8430      | 1141.9251        | H    | 2065.9648 | 1033.4860       | 2048.9382      | 1024.9727        | 2047.9542      | 1024.4807        | 19 |
| 20 | 2460.8842 | 1230.9457       | 2443.8577      | 1222.4325        | 2442.8736      | 1221.9405        | C    | 1928.9059 | 964.9566        | 1911.8793      | 956.4433         | 1910.8953      | 955.9513         | 18 |
| 21 | 2531.9213 | 1266.4643       | 2514.8948      | 1257.9510        | 2513.9108      | 1257.4590        | A    | 1768.8752 | 884.9412        | 1751.8487      | 876.4280         | 1750.8646      | 875.9360         | 17 |
| 22 | 2588.9428 | 1294.9750       | 2571.9162      | 1286.4618        | 2570.9322      | 1285.9698        | G    | 1697.8381 | 849.4227        | 1680.8115      | 840.9094         | 1679.8275      | 840.4174         | 16 |

|    |           |                  |           |                  |           |                  |   |                 |          |                  |                 |           |                 |    |
|----|-----------|------------------|-----------|------------------|-----------|------------------|---|-----------------|----------|------------------|-----------------|-----------|-----------------|----|
| 23 | 2703.9697 | <b>1352.4885</b> | 2686.9432 | 1343.9752        | 2685.9592 | 1343.4832        | N | 1640.8166       | 820.9120 | <b>1623.7901</b> | <b>812.3987</b> | 1622.8061 | <b>811.9067</b> | 15 |
| 24 | 2760.9912 | 1380.9992        | 2743.9646 | 1372.4860        | 2742.9806 | 1371.9940        | G | 1525.7897       | 763.3985 | 1508.7631        | <b>754.8852</b> | 1507.7791 | <b>754.3932</b> | 14 |
| 25 | 2848.0232 | <b>1424.5153</b> | 2830.9967 | <b>1416.0020</b> | 2830.0127 | <b>1415.5100</b> | S | 1468.7682       | 734.8877 | 1451.7417        | 726.3745        | 1450.7577 | 725.8825        | 13 |
| 26 | 3034.1025 | <b>1517.5549</b> | 3017.0760 | 1509.0416        | 3016.0920 | 1508.5496        | W | 1381.7362       | 691.3717 | 1364.7096        | <b>682.8585</b> | 1363.7256 | <b>682.3665</b> | 12 |
| 27 | 3133.1710 | <b>1567.0891</b> | 3116.1444 | <b>1558.5758</b> | 3115.1604 | <b>1558.0838</b> | V | 1195.6569       | 598.3321 | 1178.6303        | 589.8188        | 1177.6463 | 589.3268        | 11 |
| 28 | 3248.1979 | <b>1624.6026</b> | 3231.1713 | 1616.0893        | 3230.1873 | 1615.5973        | N | 1096.5885       | 548.7979 | 1079.5619        | 540.2846        | 1078.5779 | 539.7926        | 10 |
| 29 | 3377.2405 | <b>1689.1239</b> | 3360.2139 | 1680.6106        | 3359.2299 | 1680.1186        | E | 981.5615        | 491.2844 | <b>964.5350</b>  | 482.7711        | 963.5510  | 482.2791        | 9  |
| 30 | 3476.3089 | <b>1738.6581</b> | 3459.2824 | <b>1730.1448</b> | 3458.2983 | <b>1729.6528</b> | V | <b>852.5189</b> | 426.7631 | 835.4924         | 418.2498        | 834.5084  | 417.7578        | 8  |
| 31 | 3589.3930 | <b>1795.2001</b> | 3572.3664 | <b>1786.6868</b> | 3571.3824 | <b>1786.1948</b> | L | <b>753.4505</b> | 377.2289 | <b>736.4240</b>  | 368.7156        | 735.4400  | 368.2236        | 7  |
| 32 | 3646.4144 | <b>1823.7109</b> | 3629.3879 | <b>1815.1976</b> | 3628.4039 | <b>1814.7056</b> | G | <b>640.3665</b> | 320.6869 | 623.3399         | 312.1736        | 622.3559  | 311.6816        | 6  |
| 33 | 3743.4672 | 1872.2372        | 3726.4406 | 1863.7240        | 3725.4566 | 1863.2320        | P | <b>583.3450</b> | 292.1761 | 566.3184         | 283.6629        | 565.3344  | 283.1708        | 5  |
| 34 | 3872.5098 | <b>1936.7585</b> | 3855.4832 | 1928.2453        | 3854.4992 | 1927.7532        | E | <b>486.2922</b> | 243.6498 | 469.2657         | 235.1365        | 468.2817  | 234.6445        | 4  |
| 35 | 3985.5939 | 1993.3006        | 3968.5673 | 1984.7873        | 3967.5833 | 1984.2953        | L | <b>357.2496</b> | 179.1285 | <b>340.2231</b>  | 170.6152        |           |                 | 3  |
| 36 | 4082.6466 | 2041.8269        | 4065.6201 | 2033.3137        | 4064.6361 | 2032.8217        | P | 244.1656        | 122.5864 | 227.1390         | 114.0731        |           |                 | 2  |
| 37 |           |                  |           |                  |           |                  | K | 147.1128        | 74.0600  | 130.0863         | 65.5468         |           |                 | 1  |

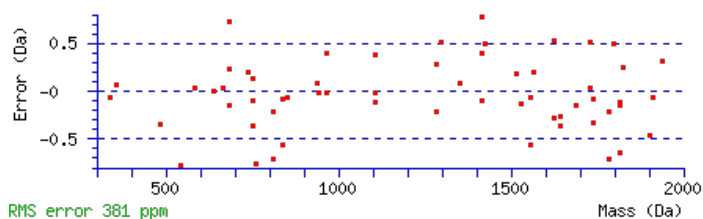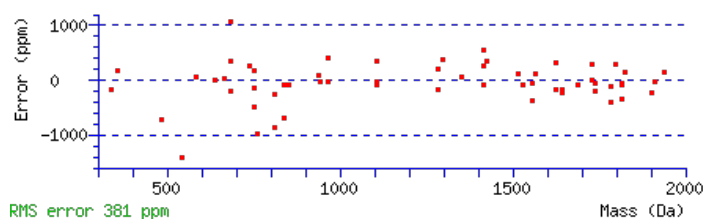

NCBI BLAST search of [YTCEEPYYMENG GGGGEYHCAGNGSWVNEVLGPELPK](#)

(Parameters: blastp, nr protein database, expect=20000, no filter, PAM30)

Other BLAST [web gateways](#)

All matches to this query

| Score | Mr(calc)  | Delta  | Sequence                                                 | Site Analysis              |
|-------|-----------|--------|----------------------------------------------------------|----------------------------|
| 37.1  | 4227.7448 | 0.0122 | <a href="#">YTCEEPYYMENG GGGGEYHCAGNGSWVNEVLGPELPK</a>   | Deamidated N23, N28 41.49% |
| 36.7  | 4227.7448 | 0.0122 | <a href="#">YTCEEPYYMENG GGGGEYHCAGNGSWVNEVLGPELPK</a>   | Deamidated N12, N23 37.23% |
| 34.2  | 4227.7448 | 0.0122 | <a href="#">YTCEEPYYMENG GGGGEYHCAGNGSWVNEVLGPELPK</a>   | Deamidated N12, N28 21.28% |
| 33.7  | 4226.7608 | 0.9962 | <a href="#">YTCEEPYYMENG GGGGEYHCAGNGSWVNEVLGPELPK</a>   |                            |
| 31.3  | 4226.7608 | 0.9962 | <a href="#">YTCEEPYYMENG GGGGEYHCAGNGSWVNEVLGPELPK</a>   |                            |
| 27.0  | 4226.7608 | 0.9962 | <a href="#">YTCEEPYYMENG GGGGEYHCAGNGSWVNEVLGPELPK</a>   |                            |
| 0.9   | 4226.7622 | 0.9949 | <a href="#">MPSLSTAVQNMGMYG NLP CNQPNTYSVTSGMNQLTQQR</a> |                            |
| 0.9   | 4226.7622 | 0.9949 | <a href="#">MPSLSTAVQNMGMYG NLP CNQPNTYSVTSGMNQLTQQR</a> |                            |
| 0.4   | 4226.7590 | 0.9980 | <a href="#">MSLVMPAMAPNETLSGRGAPGDYEEMMQIECEVMDTR</a>    |                            |

Mascot: <http://www.matrixscience.com/>

# MATRIX SCIENCE Mascot Search Results

## Peptide View

MS/MS Fragmentation of **YGNPNETQNNSTSWPVFK**

Found in **F8WF14** in **con\_Xuniprot\_HUMAN3**, F8WF14\_HUMAN Cholinesterase OS=Homo sapiens GN=BCHE PE=2 SV=1

Match to Query 13144: 2083.922268 from(1042.968410,2+) intensity(39014.5586) rtinseconds(1519) scans(3435) index(28127)

Title: 111019\_Est\_MI\_YS\_G\_12Spectrum3005\_scans\_\_3435

Data file C:\\mascot\\20140703\_Tmgf\_1D\\CSV\_UseAnalysis\\MasterCSV\\All\_Glyco\\mgf\\ptm\\UC18ERLIC\_PTM\_35D.mgf

Click mouse within plot area to zoom in by factor of two about that point

Or, to Da

Label all possible matches Label matches used for scoring

Show Y-axis

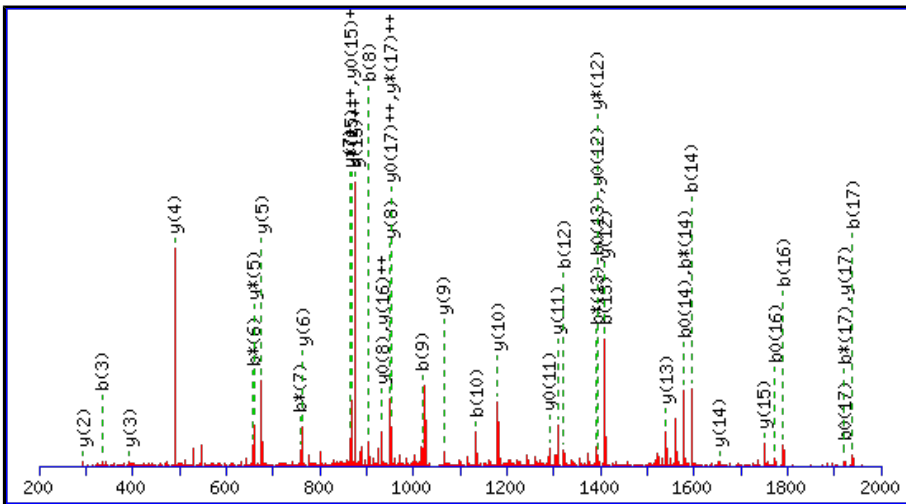

Monoisotopic mass of neutral peptide Mr(calc): 2083.9123

Fixed modifications: Carbamidomethyl (C) (apply to specified residues or termini only)

Variable modifications:

Q8 : Deamidated (NQ)

N10 : Deamidated (NQ)

Ions Score: 91 Expect: 9.6e-008

Matches : 44/180 fragment ions using 85 most intense peaks ([help](#))

| #  | b         | b <sup>++</sup> | b <sup>*</sup> | b <sup>*++</sup> | b <sup>0</sup> | b <sup>0++</sup> | Seq. | y         | y <sup>++</sup> | y <sup>*</sup> | y <sup>*++</sup> | y <sup>0</sup> | y <sup>0++</sup> | #  |
|----|-----------|-----------------|----------------|------------------|----------------|------------------|------|-----------|-----------------|----------------|------------------|----------------|------------------|----|
| 1  | 164.0706  | 82.5389         |                |                  |                |                  | Y    |           |                 |                |                  |                |                  | 18 |
| 2  | 221.0921  | 111.0497        |                |                  |                |                  | G    | 1921.8563 | 961.4318        | 1904.8297      | 952.9185         | 1903.8457      | 952.4265         | 17 |
| 3  | 335.1350  | 168.0711        | 318.1084       | 159.5579         |                |                  | N    | 1864.8348 | 932.9210        | 1847.8082      | 924.4078         | 1846.8242      | 923.9158         | 16 |
| 4  | 432.1878  | 216.5975        | 415.1612       | 208.0842         |                |                  | P    | 1750.7919 | 875.8996        | 1733.7653      | 867.3863         | 1732.7813      | 866.8943         | 15 |
| 5  | 546.2307  | 273.6190        | 529.2041       | 265.1057         |                |                  | N    | 1653.7391 | 827.3732        | 1636.7126      | 818.8599         | 1635.7285      | 818.3679         | 14 |
| 6  | 675.2733  | 338.1403        | 658.2467       | 329.6270         | 657.2627       | 329.1350         | E    | 1539.6962 | 770.3517        | 1522.6696      | 761.8385         | 1521.6856      | 761.3464         | 13 |
| 7  | 776.3210  | 388.6641        | 759.2944       | 380.1508         | 758.3104       | 379.6588         | T    | 1410.6536 | 705.8304        | 1393.6270      | 697.3172         | 1392.6430      | 696.8251         | 12 |
| 8  | 905.3636  | 453.1854        | 888.3370       | 444.6721         | 887.3530       | 444.1801         | Q    | 1309.6059 | 655.3066        | 1292.5794      | 646.7933         | 1291.5953      | 646.3013         | 11 |
| 9  | 1019.4065 | 510.2069        | 1002.3799      | 501.6936         | 1001.3959      | 501.2016         | N    | 1180.5633 | 590.7853        | 1163.5368      | 582.2720         | 1162.5527      | 581.7800         | 10 |
| 10 | 1134.4334 | 567.7203        | 1117.4069      | 559.2071         | 1116.4229      | 558.7151         | N    | 1066.5204 | 533.7638        | 1049.4938      | 525.2506         | 1048.5098      | 524.7585         | 9  |
| 11 | 1221.4655 | 611.2364        | 1204.4389      | 602.7231         | 1203.4549      | 602.2311         | S    | 951.4934  | 476.2504        | 934.4669       | 467.7371         | 933.4829       | 467.2451         | 8  |
| 12 | 1322.5131 | 661.7602        | 1305.4866      | 653.2469         | 1304.5026      | 652.7549         | T    | 864.4614  | 432.7343        | 847.4349       | 424.2211         | 846.4509       | 423.7291         | 7  |
| 13 | 1409.5452 | 705.2762        | 1392.5186      | 696.7629         | 1391.5346      | 696.2709         | S    | 763.4137  | 382.2105        | 746.3872       | 373.6972         | 745.4032       | 373.2052         | 6  |
| 14 | 1595.6245 | 798.3159        | 1578.5979      | 789.8026         | 1577.6139      | 789.3106         | W    | 676.3817  | 338.6945        | 659.3552       | 330.1812         |                |                  | 5  |
| 15 | 1692.6772 | 846.8423        | 1675.6507      | 838.3290         | 1674.6667      | 837.8370         | P    | 490.3024  | 245.6548        | 473.2758       | 237.1416         |                |                  | 4  |
| 16 | 1791.7456 | 896.3765        | 1774.7191      | 887.8632         | 1773.7351      | 887.3712         | V    | 393.2496  | 197.1285        | 376.2231       | 188.6152         |                |                  | 3  |
| 17 | 1938.8141 | 969.9107        | 1921.7875      | 961.3974         | 1920.8035      | 960.9054         | F    | 294.1812  | 147.5942        | 277.1547       | 139.0810         |                |                  | 2  |
| 18 |           |                 |                |                  |                |                  | K    | 147.1128  | 74.0600         | 130.0863       | 65.5468          |                |                  | 1  |

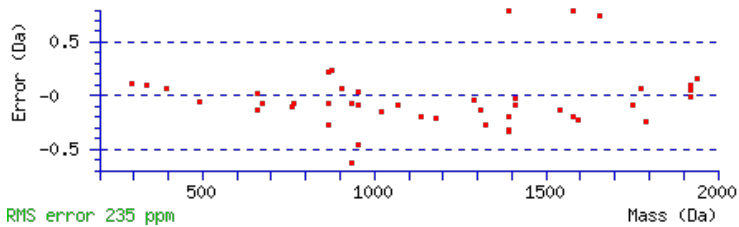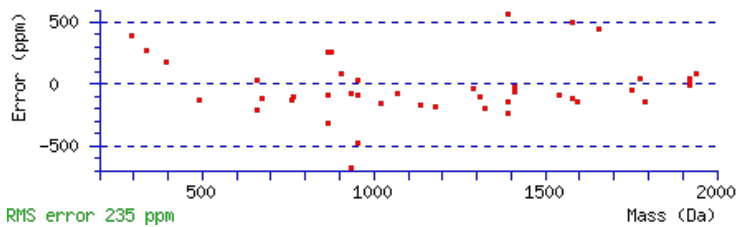

NCBI **BLAST** search of [YGNPNETQNNSTSWPVFK](#)

(Parameters: blastp, nr protein database, expect=20000, no filter, PAM30)

Other BLAST [web gateways](#)

**All matches to this query**

| Score | Mr(calc)  | Delta  | Sequence                           | Site Analysis             |
|-------|-----------|--------|------------------------------------|---------------------------|
| 90.8  | 2083.9123 | 0.0100 | <a href="#">YGNPNETQNNSTSWPVFK</a> | Deamidated Q8, N10 35.20% |
| 90.7  | 2083.9123 | 0.0100 | <a href="#">YGNPNETQNNSTSWPVFK</a> | Deamidated N9, N10 34.39% |
| 88.1  | 2083.9123 | 0.0100 | <a href="#">YGNPNETQNNSTSWPVFK</a> | Deamidated N5, N10 19.08% |
| 81.9  | 2083.9123 | 0.0100 | <a href="#">YGNPNETQNNSTSWPVFK</a> | Deamidated N5, N9 4.59%   |
| 81.9  | 2083.9123 | 0.0100 | <a href="#">YGNPNETQNNSTSWPVFK</a> | Deamidated N5, Q8 4.59%   |
| 77.6  | 2083.9123 | 0.0100 | <a href="#">YGNPNETQNNSTSWPVFK</a> | Deamidated Q8, N9 1.71%   |
| 67.1  | 2083.9123 | 0.0100 | <a href="#">YGNPNETQNNSTSWPVFK</a> | Deamidated N3, N10 0.15%  |
| 67.1  | 2083.9123 | 0.0100 | <a href="#">YGNPNETQNNSTSWPVFK</a> | Deamidated N3, N9 0.15%   |
| 67.1  | 2083.9123 | 0.0100 | <a href="#">YGNPNETQNNSTSWPVFK</a> | Deamidated N3, Q8 0.15%   |
| 53.3  | 2082.9283 | 0.9940 | <a href="#">YGNPNETQNNSTSWPVFK</a> |                           |

Mascot: <http://www.matrixscience.com/>



# MATRIX SCIENCE Mascot Search Results

## Peptide View

MS/MS Fragmentation of **YGNPNETQNNSTSWPVFK**

Found in **F8WF14** in **con\_Xuniprot\_HUMAN3**, F8WF14\_HUMAN Cholinesterase OS=Homo sapiens GN=BCHE PE=2 SV=1

Match to Query 13135: 2083.917868 from(1042.966210,2+) intensity(18234.7734) rtinseconds(1565) scans(3759) index(27432)

Title: 111019\_Est\_MI\_YS\_G\_10Spectrum3234\_scans\_\_3759

Data file C:\\mascot\\20140703\_Tmgf\_1D\\CSV\_UseAnalysis\\MasterCSV\\All\_Glyco\\mgf\\ptm\\UC18ERLIC\_PTMT\_35D.mgf

Click mouse within plot area to zoom in by factor of two about that point

Or, to Da

Label all possible matches Label matches used for scoring

Show Y-axis

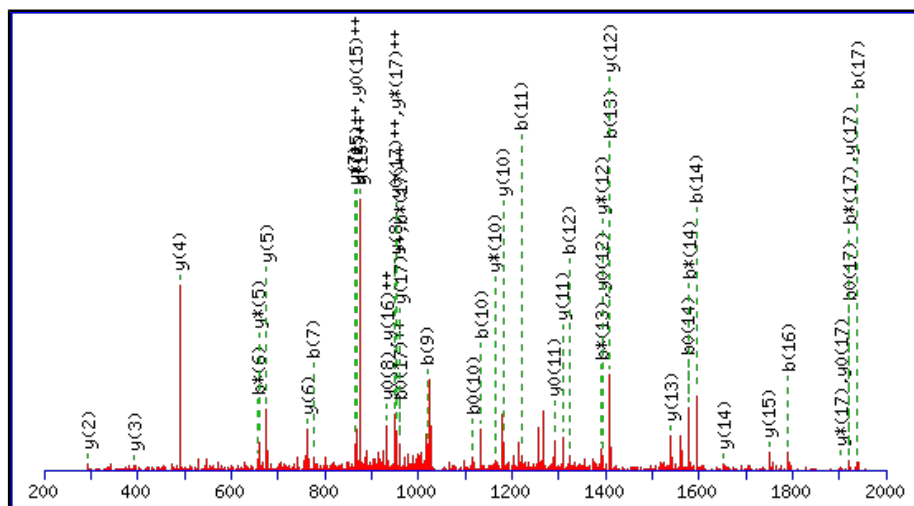

Monoisotopic mass of neutral peptide Mr(calc): 2083.9123

Fixed modifications: Carbamidomethyl (C) (apply to specified residues or termini only)

Variable modifications:

N9 : Deamidated (NQ)

N10 : Deamidated (NQ)

Ions Score: 78 Expect: 1.5e-006

Matches : 47/180 fragment ions using 85 most intense peaks ([help](#))

| #  | b         | b <sup>++</sup> | b*        | b <sup>*++</sup> | b <sup>0</sup> | b <sup>0++</sup> | Seq. | y         | y <sup>++</sup> | y*        | y <sup>*++</sup> | y <sup>0</sup> | y <sup>0++</sup> | #  |
|----|-----------|-----------------|-----------|------------------|----------------|------------------|------|-----------|-----------------|-----------|------------------|----------------|------------------|----|
| 1  | 164.0706  | 82.5389         |           |                  |                |                  | Y    |           |                 |           |                  |                |                  | 18 |
| 2  | 221.0921  | 111.0497        |           |                  |                |                  | G    | 1921.8563 | 961.4318        | 1904.8297 | 952.9185         | 1903.8457      | 952.4265         | 17 |
| 3  | 335.1350  | 168.0711        | 318.1084  | 159.5579         |                |                  | N    | 1864.8348 | 932.9210        | 1847.8082 | 924.4078         | 1846.8242      | 923.9158         | 16 |
| 4  | 432.1878  | 216.5975        | 415.1612  | 208.0842         |                |                  | P    | 1750.7919 | 875.8996        | 1733.7653 | 867.3863         | 1732.7813      | 866.8943         | 15 |
| 5  | 546.2307  | 273.6190        | 529.2041  | 265.1057         |                |                  | N    | 1653.7391 | 827.3732        | 1636.7126 | 818.8599         | 1635.7285      | 818.3679         | 14 |
| 6  | 675.2733  | 338.1403        | 658.2467  | 329.6270         | 657.2627       | 329.1350         | E    | 1539.6962 | 770.3517        | 1522.6696 | 761.8385         | 1521.6856      | 761.3464         | 13 |
| 7  | 776.3210  | 388.6641        | 759.2944  | 380.1508         | 758.3104       | 379.6588         | T    | 1410.6536 | 705.8304        | 1393.6270 | 697.3172         | 1392.6430      | 696.8251         | 12 |
| 8  | 904.3795  | 452.6934        | 887.3530  | 444.1801         | 886.3690       | 443.6881         | Q    | 1309.6059 | 655.3066        | 1292.5794 | 646.7933         | 1291.5953      | 646.3013         | 11 |
| 9  | 1019.4065 | 510.2069        | 1002.3799 | 501.6936         | 1001.3959      | 501.2016         | N    | 1181.5473 | 591.2773        | 1164.5208 | 582.7640         | 1163.5368      | 582.2720         | 10 |
| 10 | 1134.4334 | 567.7203        | 1117.4069 | 559.2071         | 1116.4229      | 558.7151         | N    | 1066.5204 | 533.7638        | 1049.4938 | 525.2506         | 1048.5098      | 524.7585         | 9  |
| 11 | 1221.4655 | 611.2364        | 1204.4389 | 602.7231         | 1203.4549      | 602.2311         | S    | 951.4934  | 476.2504        | 934.4669  | 467.7371         | 933.4829       | 467.2451         | 8  |
| 12 | 1322.5131 | 661.7602        | 1305.4866 | 653.2469         | 1304.5026      | 652.7549         | T    | 864.4614  | 432.7343        | 847.4349  | 424.2211         | 846.4509       | 423.7291         | 7  |
| 13 | 1409.5452 | 705.2762        | 1392.5186 | 696.7629         | 1391.5346      | 696.2709         | S    | 763.4137  | 382.2105        | 746.3872  | 373.6972         | 745.4032       | 373.2052         | 6  |
| 14 | 1595.6245 | 798.3159        | 1578.5979 | 789.8026         | 1577.6139      | 789.3106         | W    | 676.3817  | 338.6945        | 659.3552  | 330.1812         |                |                  | 5  |
| 15 | 1692.6772 | 846.8423        | 1675.6507 | 838.3290         | 1674.6667      | 837.8370         | P    | 490.3024  | 245.6548        | 473.2758  | 237.1416         |                |                  | 4  |
| 16 | 1791.7456 | 896.3765        | 1774.7191 | 887.8632         | 1773.7351      | 887.3712         | V    | 393.2496  | 197.1285        | 376.2231  | 188.6152         |                |                  | 3  |
| 17 | 1938.8141 | 969.9107        | 1921.7875 | 961.3974         | 1920.8035      | 960.9054         | F    | 294.1812  | 147.5942        | 277.1547  | 139.0810         |                |                  | 2  |
| 18 |           |                 |           |                  |                |                  | K    | 147.1128  | 74.0600         | 130.0863  | 65.5468          |                |                  | 1  |



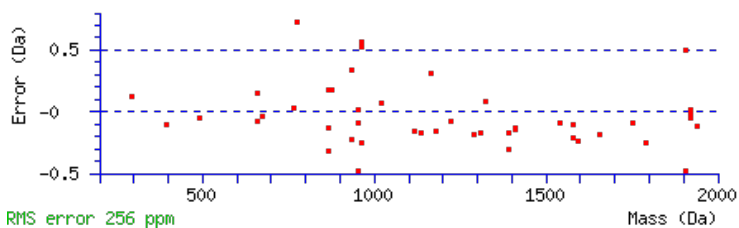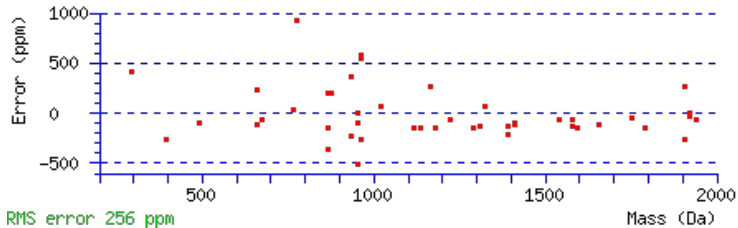

NCBI BLAST search of [YGPNPNETQNNSTSWPVFK](#)

(Parameters: blastp, nr protein database, expect=20000, no filter, PAM30)

Other BLAST [web gateways](#)

**All matches to this query**

| Score | Mr(calc)  | Delta  | Sequence                            | Site Analysis             |
|-------|-----------|--------|-------------------------------------|---------------------------|
| 78.4  | 2083.9123 | 0.0056 | <a href="#">YGPNPNETQNNSTSWPVFK</a> | Deamidated N9, N10 23.96% |
| 78.3  | 2083.9123 | 0.0056 | <a href="#">YGPNPNETQNNSTSWPVFK</a> | Deamidated N5, N10 23.69% |
| 77.3  | 2083.9123 | 0.0056 | <a href="#">YGPNPNETQNNSTSWPVFK</a> | Deamidated Q8, N10 18.43% |
| 77.1  | 2083.9123 | 0.0056 | <a href="#">YGPNPNETQNNSTSWPVFK</a> | Deamidated N5, N9 17.81%  |
| 76.0  | 2083.9123 | 0.0056 | <a href="#">YGPNPNETQNNSTSWPVFK</a> | Deamidated Q8, N9 13.82%  |
| 66.0  | 2083.9123 | 0.0056 | <a href="#">YGPNPNETQNNSTSWPVFK</a> | Deamidated N5, Q8 1.39%   |
| 61.0  | 2083.9123 | 0.0056 | <a href="#">YGPNPNETQNNSTSWPVFK</a> | Deamidated N3, N10 0.44%  |
| 61.0  | 2083.9123 | 0.0056 | <a href="#">YGPNPNETQNNSTSWPVFK</a> | Deamidated N3, N9 0.44%   |
| 47.6  | 2083.9123 | 0.0056 | <a href="#">YGPNPNETQNNSTSWPVFK</a> | Deamidated N3, Q8 0.02%   |
| 35.3  | 2083.9123 | 0.0056 | <a href="#">YGPNPNETQNNSTSWPVFK</a> | Deamidated N3, N5 0.00%   |

Mascot: <http://www.matrixscience.com/>

# MATRIX SCIENCE Mascot Search Results

## Peptide View

MS/MS Fragmentation of **YGNPNETQNNSTSWPVFK**

Found in **F8WF14** in **con\_Xuniprot\_HUMAN3**, F8WF14\_HUMAN Cholinesterase OS=Homo sapiens GN=BCHE PE=2 SV=1

Match to Query 13142: 2083.921688 from(1042.968120,2+) intensity(27549.4844) rtinseconds(1541) scans(3490) index(28129)

Title: 111019\_Est\_MI\_YS\_G\_12Spectrum3055\_scans\_\_3490

Data file C:\\mascot\\20140703\_Tmgf\_1D\\CSV\_UseAnalysis\\MasterCSV\\All\_Glyco\\mgf\\ptm\\UC18ERLIC\_PTM\_35D.mgf

Click mouse within plot area to zoom in by factor of two about that point

Or, to Da

Label all possible matches Label matches used for scoring

Show Y-axis

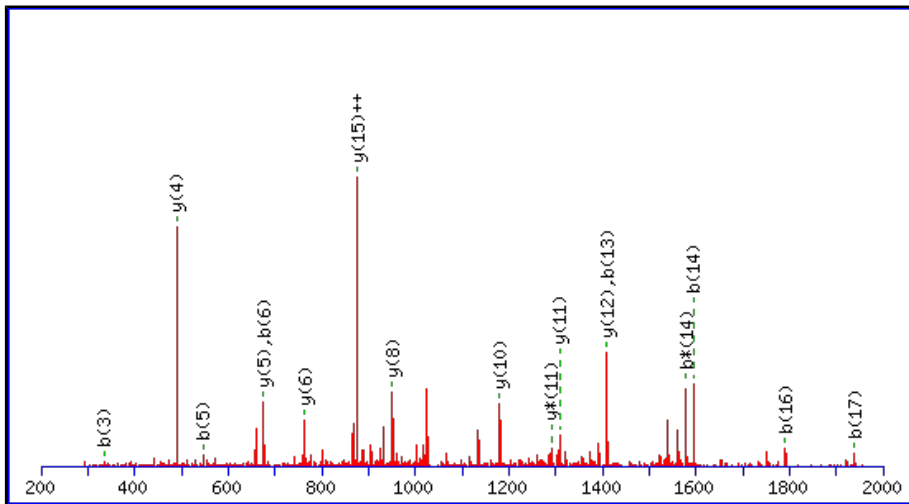

Monoisotopic mass of neutral peptide Mr(calc): 2083.9123

Fixed modifications: Carbamidomethyl (C) (apply to specified residues or termini only)

Variable modifications:

N5 : Deamidated (NQ)

N10 : Deamidated (NQ)

Ions Score: 75 Expect: 3.4e-006

Matches : 17/180 fragment ions using 17 most intense peaks ([help](#))

| #  | b                | b <sup>++</sup> | b*               | b <sup>*++</sup> | b <sup>0</sup> | b <sup>0++</sup> | Seq. | y                | y <sup>++</sup> | y*               | y <sup>*++</sup> | y <sup>0</sup> | y <sup>0++</sup> | #  |
|----|------------------|-----------------|------------------|------------------|----------------|------------------|------|------------------|-----------------|------------------|------------------|----------------|------------------|----|
| 1  | 164.0706         | 82.5389         |                  |                  |                |                  | Y    |                  |                 |                  |                  |                |                  | 18 |
| 2  | 221.0921         | 111.0497        |                  |                  |                |                  | G    | 1921.8563        | 961.4318        | 1904.8297        | 952.9185         | 1903.8457      | 952.4265         | 17 |
| 3  | <b>335.1350</b>  | 168.0711        | 318.1084         | 159.5579         |                |                  | N    | 1864.8348        | 932.9210        | 1847.8082        | 924.4078         | 1846.8242      | 923.9158         | 16 |
| 4  | 432.1878         | 216.5975        | 415.1612         | 208.0842         |                |                  | P    | 1750.7919        | <b>875.8996</b> | 1733.7653        | 867.3863         | 1732.7813      | 866.8943         | 15 |
| 5  | <b>547.2147</b>  | 274.1110        | 530.1882         | 265.5977         |                |                  | N    | 1653.7391        | 827.3732        | 1636.7126        | 818.8599         | 1635.7285      | 818.3679         | 14 |
| 6  | <b>676.2573</b>  | 338.6323        | 659.2307         | 330.1190         | 658.2467       | 329.6270         | E    | 1538.7122        | 769.8597        | 1521.6856        | 761.3464         | 1520.7016      | 760.8544         | 13 |
| 7  | 777.3050         | 389.1561        | 760.2784         | 380.6429         | 759.2944       | 380.1508         | T    | <b>1409.6696</b> | 705.3384        | 1392.6430        | 696.8251         | 1391.6590      | 696.3331         | 12 |
| 8  | 905.3636         | 453.1854        | 888.3370         | 444.6721         | 887.3530       | 444.1801         | Q    | <b>1308.6219</b> | 654.8146        | <b>1291.5953</b> | 646.3013         | 1290.6113      | 645.8093         | 11 |
| 9  | 1019.4065        | 510.2069        | 1002.3799        | 501.6936         | 1001.3959      | 501.2016         | N    | <b>1180.5633</b> | 590.7853        | 1163.5368        | 582.2720         | 1162.5527      | 581.7800         | 10 |
| 10 | 1134.4334        | 567.7203        | 1117.4069        | 559.2071         | 1116.4229      | 558.7151         | N    | 1066.5204        | 533.7638        | 1049.4938        | 525.2506         | 1048.5098      | 524.7585         | 9  |
| 11 | 1221.4655        | 611.2364        | 1204.4389        | 602.7231         | 1203.4549      | 602.2311         | S    | <b>951.4934</b>  | 476.2504        | 934.4669         | 467.7371         | 933.4829       | 467.2451         | 8  |
| 12 | 1322.5131        | 661.7602        | 1305.4866        | 653.2469         | 1304.5026      | 652.7549         | T    | 864.4614         | 432.7343        | 847.4349         | 424.2211         | 846.4509       | 423.7291         | 7  |
| 13 | <b>1409.5452</b> | 705.2762        | 1392.5186        | 696.7629         | 1391.5346      | 696.2709         | S    | <b>763.4137</b>  | 382.2105        | 746.3872         | 373.6972         | 745.4032       | 373.2052         | 6  |
| 14 | <b>1595.6245</b> | 798.3159        | <b>1578.5979</b> | 789.8026         | 1577.6139      | 789.3106         | W    | <b>676.3817</b>  | 338.6945        | 659.3552         | 330.1812         |                |                  | 5  |
| 15 | 1692.6772        | 846.8423        | 1675.6507        | 838.3290         | 1674.6667      | 837.8370         | P    | <b>490.3024</b>  | 245.6548        | 473.2758         | 237.1416         |                |                  | 4  |
| 16 | <b>1791.7456</b> | 896.3765        | 1774.7191        | 887.8632         | 1773.7351      | 887.3712         | V    | 393.2496         | 197.1285        | 376.2231         | 188.6152         |                |                  | 3  |
| 17 | <b>1938.8141</b> | 969.9107        | 1921.7875        | 961.3974         | 1920.8035      | 960.9054         | F    | 294.1812         | 147.5942        | 277.1547         | 139.0810         |                |                  | 2  |
| 18 |                  |                 |                  |                  |                |                  | K    | 147.1128         | 74.0600         | 130.0863         | 65.5468          |                |                  | 1  |

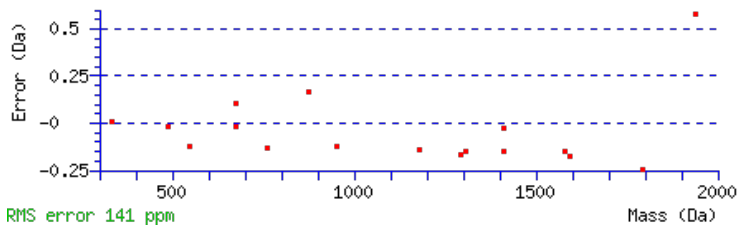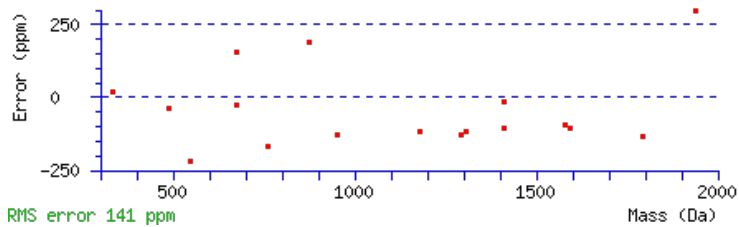

NCBI BLAST search of [YGPNPNETQNNSTSWPVFK](#)

(Parameters: blastp, nr protein database, expect=20000, no filter, PAM30)

Other BLAST [web gateways](#)

**All matches to this query**

| Score | Mr(calc)  | Delta  | Sequence                            | Site Analysis             |
|-------|-----------|--------|-------------------------------------|---------------------------|
| 75.3  | 2083.9123 | 0.0094 | <a href="#">YGPNPNETQNNSTSWPVFK</a> | Deamidated N5, N10 37.20% |
| 75.3  | 2083.9123 | 0.0094 | <a href="#">YGPNPNETQNNSTSWPVFK</a> | Deamidated N5, N9 37.20%  |
| 68.2  | 2083.9123 | 0.0094 | <a href="#">YGPNPNETQNNSTSWPVFK</a> | Deamidated Q8, N9 7.22%   |
| 67.3  | 2083.9123 | 0.0094 | <a href="#">YGPNPNETQNNSTSWPVFK</a> | Deamidated Q8, N10 5.94%  |
| 67.3  | 2083.9123 | 0.0094 | <a href="#">YGPNPNETQNNSTSWPVFK</a> | Deamidated N9, N10 5.84%  |
| 62.9  | 2083.9123 | 0.0094 | <a href="#">YGPNPNETQNNSTSWPVFK</a> | Deamidated N3, N10 2.17%  |
| 62.9  | 2083.9123 | 0.0094 | <a href="#">YGPNPNETQNNSTSWPVFK</a> | Deamidated N3, N9 2.17%   |
| 62.7  | 2083.9123 | 0.0094 | <a href="#">YGPNPNETQNNSTSWPVFK</a> | Deamidated N5, Q8 2.06%   |
| 51.7  | 2083.9123 | 0.0094 | <a href="#">YGPNPNETQNNSTSWPVFK</a> | Deamidated N3, Q8 0.16%   |
| 47.8  | 2082.9283 | 0.9934 | <a href="#">YGPNPNETQNNSTSWPVFK</a> |                           |

Mascot: <http://www.matrixscience.com/>

# MATRIX SCIENCE Mascot Search Results

## Peptide View

MS/MS Fragmentation of **DNYTKAEEILSR**

Found in **F8WEX7** in **con\_Xuniprot\_HUMAN3**, F8WEX7\_HUMAN Cholinesterase OS=Homo sapiens GN=BCHE PE=2 SV=1

Match to Query 4067: 1438.698008 from(720.356280,2+) intensity(9644.3271) rtinseconds(1198) scans(2339) index(213)

Title: 111019\_Est\_ISCardio\_NMI\_200000g\_G\_5Spectrum1973\_scans\_\_2339

Data file C:\\mascot\\20140703\_Tmgf\_1D\\CSV\_UseAnalysis\\MasterCSV\\All\_Glyco\\mgf\\ptm\\UC18ERLIC\_PTM\_35D.mgf

Click mouse within plot area to zoom in by factor of two about that point

Or, to Da

Label all possible matches Label matches used for scoring

Show Y-axis

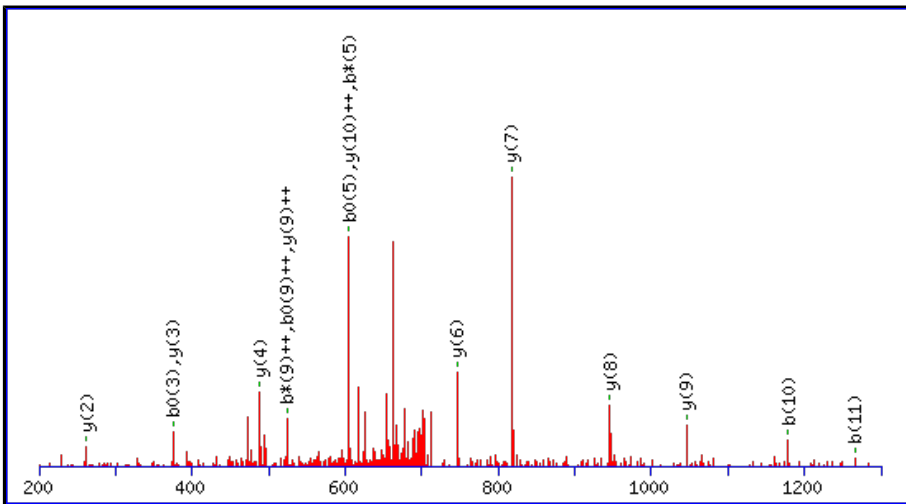

Monoisotopic mass of neutral peptide Mr(calc): 1438.6939

Fixed modifications: Carbamidomethyl (C) (apply to specified residues or termini only)

Variable modifications:

N2 : Deamidated (NQ)

Ions Score: 70 Expect: 2e-005

Matches : 16/128 fragment ions using 11 most intense peaks ([help](#))

| #  | b         | b <sup>++</sup> | b*        | b <sup>+++</sup> | b <sup>0</sup> | b <sup>0++</sup> | Seq. | y         | y <sup>++</sup> | y*        | y <sup>+++</sup> | y <sup>0</sup> | y <sup>0++</sup> | #  |
|----|-----------|-----------------|-----------|------------------|----------------|------------------|------|-----------|-----------------|-----------|------------------|----------------|------------------|----|
| 1  | 116.0342  | 58.5207         |           |                  | 98.0237        | 49.5155          | D    |           |                 |           |                  |                |                  | 12 |
| 2  | 231.0612  | 116.0342        | 214.0346  | 107.5209         | 213.0506       | 107.0289         | N    | 1324.6743 | 662.8408        | 1307.6478 | 654.3275         | 1306.6638      | 653.8355         | 11 |
| 3  | 394.1245  | 197.5659        | 377.0979  | 189.0526         | 376.1139       | 188.5606         | Y    | 1209.6474 | 605.3273        | 1192.6208 | 596.8141         | 1191.6368      | 596.3220         | 10 |
| 4  | 495.1722  | 248.0897        | 478.1456  | 239.5764         | 477.1616       | 239.0844         | T    | 1046.5840 | 523.7957        | 1029.5575 | 515.2824         | 1028.5735      | 514.7904         | 9  |
| 5  | 623.2671  | 312.1372        | 606.2406  | 303.6239         | 605.2566       | 303.1319         | K    | 945.5364  | 473.2718        | 928.5098  | 464.7585         | 927.5258       | 464.2665         | 8  |
| 6  | 694.3042  | 347.6558        | 677.2777  | 339.1425         | 676.2937       | 338.6505         | A    | 817.4414  | 409.2243        | 800.4149  | 400.7111         | 799.4308       | 400.2191         | 7  |
| 7  | 823.3468  | 412.1771        | 806.3203  | 403.6638         | 805.3363       | 403.1718         | E    | 746.4043  | 373.7058        | 729.3777  | 365.1925         | 728.3937       | 364.7005         | 6  |
| 8  | 952.3894  | 476.6984        | 935.3629  | 468.1851         | 934.3789       | 467.6931         | E    | 617.3617  | 309.1845        | 600.3352  | 300.6712         | 599.3511       | 300.1792         | 5  |
| 9  | 1065.4735 | 533.2404        | 1048.4469 | 524.7271         | 1047.4629      | 524.2351         | I    | 488.3191  | 244.6632        | 471.2926  | 236.1499         | 470.3085       | 235.6579         | 4  |
| 10 | 1178.5576 | 589.7824        | 1161.5310 | 581.2691         | 1160.5470      | 580.7771         | L    | 375.2350  | 188.1212        | 358.2085  | 179.6079         | 357.2245       | 179.1159         | 3  |
| 11 | 1265.5896 | 633.2984        | 1248.5630 | 624.7852         | 1247.5790      | 624.2931         | S    | 262.1510  | 131.5791        | 245.1244  | 123.0659         | 244.1404       | 122.5738         | 2  |
| 12 |           |                 |           |                  |                |                  | R    | 175.1190  | 88.0631         | 158.0924  | 79.5498          |                |                  | 1  |

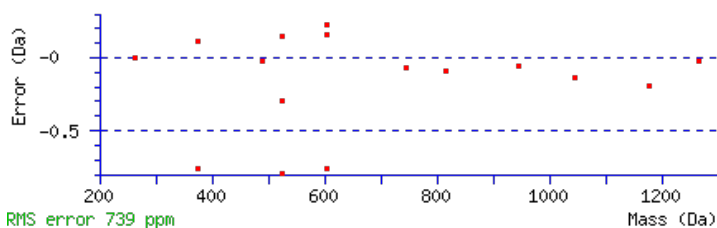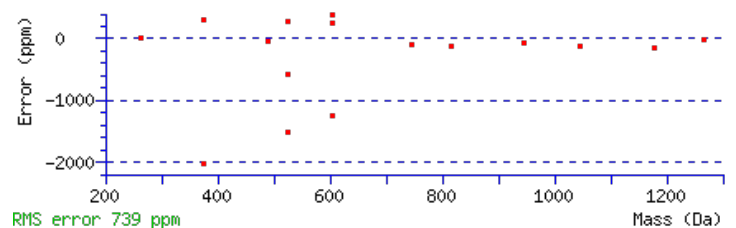

NCBI **BLAST** search of [DNYTKAEEILSR](#)

(Parameters: blastp, nr protein database, expect=20000, no filter, PAM30)

Other BLAST [web gateways](#)

**All matches to this query**

| Score | Mr(calc)  | Delta   | Sequence                      |
|-------|-----------|---------|-------------------------------|
| 69.9  | 1438.6939 | 0.0041  | <a href="#">DNYTKAEEILSR</a>  |
| 17.8  | 1438.7020 | -0.0040 | <a href="#">EASSTKGRMVMSR</a> |
| 14.4  | 1438.6939 | 0.0041  | <a href="#">NQLHKEPSELNK</a>  |
| 12.6  | 1438.7052 | -0.0072 | <a href="#">DSTAIQEPSVVHR</a> |
| 12.3  | 1438.6939 | 0.0041  | <a href="#">NLYSDLKNLDSR</a>  |
| 10.9  | 1438.7014 | -0.0033 | <a href="#">DIFLSNTMAAIDK</a> |
| 10.6  | 1438.6914 | 0.0066  | <a href="#">NFCAWQKCLNK</a>   |
| 10.1  | 1438.6915 | 0.0065  | <a href="#">QLFVMQWDLSR</a>   |
| 9.6   | 1438.7014 | -0.0034 | <a href="#">AQFLDLMETIDK</a>  |
| 9.6   | 1438.7014 | -0.0034 | <a href="#">SQFLDLMETIDK</a>  |

**Mascot:** <http://www.matrixscience.com/>

# MATRIX SCIENCE Mascot Search Results

## Peptide View

MS/MS Fragmentation of **YGNNPNETQNNSTSWPVFK**

Found in **F8WF14** in **con\_Xuniprot\_HUMAN3**, F8WF14\_HUMAN Cholinesterase OS=Homo sapiens GN=BCHE PE=2 SV=1

Match to Query 13139: 2083.920728 from(1042.967640,2+) intensity(7130.5996) rtinseconds(1560) scans(3356) index(7616)

Title: 111019\_Est\_ISCardio\_NMI\_YP\_G\_12Spectrum2899\_scans\_\_3356

Data file C:\\mascot\\20140703\_Tmgf\_1D\\CSV\_UseAnalysis\\MasterCSV\\All\_Glyco\\mgf\\ptm\\UC18ERLIC\_PTM\_35D.mgf

Click mouse within plot area to zoom in by factor of two about that point

Or, to Da

Label all possible matches Label matches used for scoring

Show Y-axis

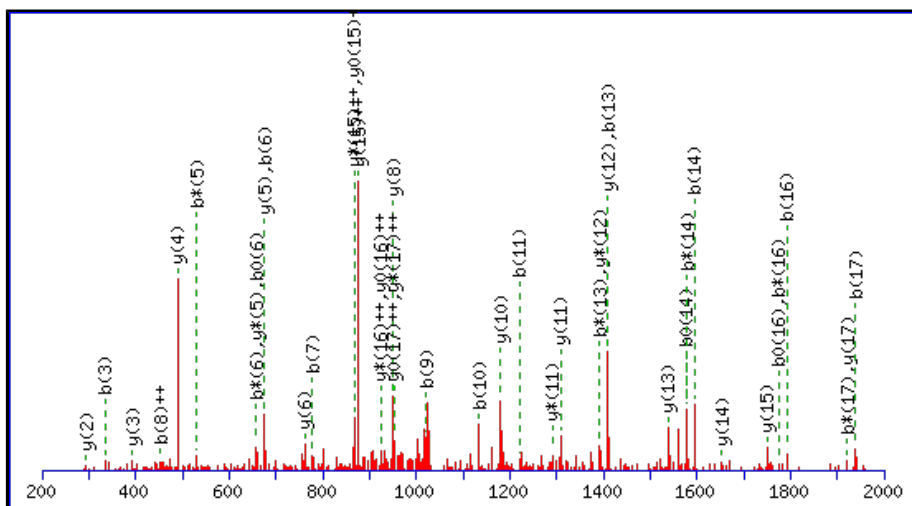

Monoisotopic mass of neutral peptide Mr(calc): 2083.9123

Fixed modifications: Carbamidomethyl (C) (apply to specified residues or termini only)

Variable modifications:

N5 : Deamidated (NQ)

N9 : Deamidated (NQ)

Ions Score: 65 Expect: 3.3e-005

Matches : 43/180 fragment ions using 85 most intense peaks ([help](#))

| #  | b         | b <sup>++</sup> | b <sup>*</sup> | b <sup>*++</sup> | b <sup>0</sup> | b <sup>0++</sup> | Seq. | y         | y <sup>++</sup> | y <sup>*</sup> | y <sup>*++</sup> | y <sup>0</sup> | y <sup>0++</sup> | #  |
|----|-----------|-----------------|----------------|------------------|----------------|------------------|------|-----------|-----------------|----------------|------------------|----------------|------------------|----|
| 1  | 164.0706  | 82.5389         |                |                  |                |                  | Y    |           |                 |                |                  |                |                  | 18 |
| 2  | 221.0921  | 111.0497        |                |                  |                |                  | G    | 1921.8563 | 961.4318        | 1904.8297      | 952.9185         | 1903.8457      | 952.4265         | 17 |
| 3  | 335.1350  | 168.0711        | 318.1084       | 159.5579         |                |                  | N    | 1864.8348 | 932.9210        | 1847.8082      | 924.4078         | 1846.8242      | 923.9158         | 16 |
| 4  | 432.1878  | 216.5975        | 415.1612       | 208.0842         |                |                  | P    | 1750.7919 | 875.8996        | 1733.7653      | 867.3863         | 1732.7813      | 866.8943         | 15 |
| 5  | 547.2147  | 274.1110        | 530.1882       | 265.5977         |                |                  | N    | 1653.7391 | 827.3732        | 1636.7126      | 818.8599         | 1635.7285      | 818.3679         | 14 |
| 6  | 676.2573  | 338.6323        | 659.2307       | 330.1190         | 658.2467       | 329.6270         | E    | 1538.7122 | 769.8597        | 1521.6856      | 761.3464         | 1520.7016      | 760.8544         | 13 |
| 7  | 777.3050  | 389.1561        | 760.2784       | 380.6429         | 759.2944       | 380.1508         | T    | 1409.6696 | 705.3384        | 1392.6430      | 696.8251         | 1391.6590      | 696.3331         | 12 |
| 8  | 905.3636  | 453.1854        | 888.3370       | 444.6721         | 887.3530       | 444.1801         | Q    | 1308.6219 | 654.8146        | 1291.5953      | 646.3013         | 1290.6113      | 645.8093         | 11 |
| 9  | 1020.3905 | 510.6989        | 1003.3639      | 502.1856         | 1002.3799      | 501.6936         | N    | 1180.5633 | 590.7853        | 1163.5368      | 582.2720         | 1162.5527      | 581.7800         | 10 |
| 10 | 1134.4334 | 567.7203        | 1117.4069      | 559.2071         | 1116.4229      | 558.7151         | N    | 1065.5364 | 533.2718        | 1048.5098      | 524.7585         | 1047.5258      | 524.2665         | 9  |
| 11 | 1221.4655 | 611.2364        | 1204.4389      | 602.7231         | 1203.4549      | 602.2311         | S    | 951.4934  | 476.2504        | 934.4669       | 467.7371         | 933.4829       | 467.2451         | 8  |
| 12 | 1322.5131 | 661.7602        | 1305.4866      | 653.2469         | 1304.5026      | 652.7549         | T    | 864.4614  | 432.7343        | 847.4349       | 424.2211         | 846.4509       | 423.7291         | 7  |
| 13 | 1409.5452 | 705.2762        | 1392.5186      | 696.7629         | 1391.5346      | 696.2709         | S    | 763.4137  | 382.2105        | 746.3872       | 373.6972         | 745.4032       | 373.2052         | 6  |
| 14 | 1595.6245 | 798.3159        | 1578.5979      | 789.8026         | 1577.6139      | 789.3106         | W    | 676.3817  | 338.6945        | 659.3552       | 330.1812         |                |                  | 5  |
| 15 | 1692.6772 | 846.8423        | 1675.6507      | 838.3290         | 1674.6667      | 837.8370         | P    | 490.3024  | 245.6548        | 473.2758       | 237.1416         |                |                  | 4  |
| 16 | 1791.7456 | 896.3765        | 1774.7191      | 887.8632         | 1773.7351      | 887.3712         | V    | 393.2496  | 197.1285        | 376.2231       | 188.6152         |                |                  | 3  |
| 17 | 1938.8141 | 969.9107        | 1921.7875      | 961.3974         | 1920.8035      | 960.9054         | F    | 294.1812  | 147.5942        | 277.1547       | 139.0810         |                |                  | 2  |
| 18 |           |                 |                |                  |                |                  | K    | 147.1128  | 74.0600         | 130.0863       | 65.5468          |                |                  | 1  |

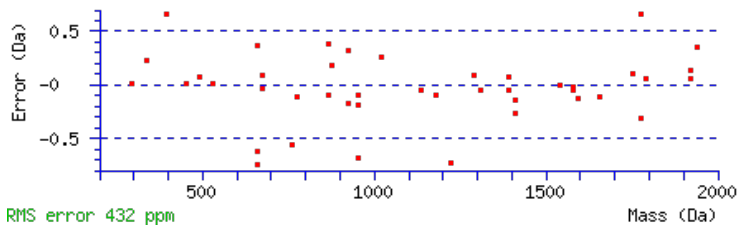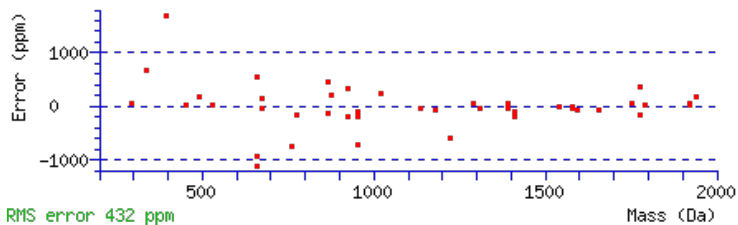

NCBI **BLAST** search of [YGPNPNETQNNSTSWPVFK](#)

(Parameters: blastp, nr protein database, expect=20000, no filter, PAM30)

Other BLAST [web gateways](#)

**All matches to this query**

| Score | Mr(calc)  | Delta  | Sequence                            | Site Analysis             |
|-------|-----------|--------|-------------------------------------|---------------------------|
| 65.3  | 2083.9123 | 0.0084 | <a href="#">YGPNPNETQNNSTSWPVFK</a> | Deamidated N5, N9 47.79%  |
| 61.3  | 2083.9123 | 0.0084 | <a href="#">YGPNPNETQNNSTSWPVFK</a> | Deamidated N5, N10 19.20% |
| 58.6  | 2083.9123 | 0.0084 | <a href="#">YGPNPNETQNNSTSWPVFK</a> | Deamidated N5, Q8 10.24%  |
| 56.1  | 2083.9123 | 0.0084 | <a href="#">YGPNPNETQNNSTSWPVFK</a> | Deamidated Q8, N9 5.72%   |
| 55.3  | 2083.9123 | 0.0084 | <a href="#">YGPNPNETQNNSTSWPVFK</a> | Deamidated N3, N9 4.80%   |
| 54.3  | 2083.9123 | 0.0084 | <a href="#">YGPNPNETQNNSTSWPVFK</a> | Deamidated Q8, N10 3.84%  |
| 54.2  | 2083.9123 | 0.0084 | <a href="#">YGPNPNETQNNSTSWPVFK</a> | Deamidated N9, N10 3.75%  |
| 53.7  | 2083.9123 | 0.0084 | <a href="#">YGPNPNETQNNSTSWPVFK</a> | Deamidated N3, N10 3.31%  |
| 49.6  | 2083.9123 | 0.0084 | <a href="#">YGPNPNETQNNSTSWPVFK</a> | Deamidated N3, Q8 1.30%   |
| 33.2  | 2083.9123 | 0.0084 | <a href="#">YGPNPNETQNNSTSWPVFK</a> | Deamidated N3, N5 0.03%   |

Mascot: <http://www.matrixscience.com/>



# MATRIX SCIENCE Mascot Search Results

## Peptide View

MS/MS Fragmentation of **YGNNPNETQNNSTSWPVFK**

Found in **F8WF14** in **con\_Xuniprot\_HUMAN3**, F8WF14\_HUMAN Cholinesterase OS=Homo sapiens GN=BCHE PE=2 SV=1

Match to Query 13147: 2083.925168 from(1042.969860,2+) intensity(26204.5996) rtinseconds(1587) scans(3821) index(27439)

Title: 111019\_Est\_MI\_YS\_G\_10Spectrum3290\_scans\_\_3821

Data file C:\\mascot\\20140703\_Tmgf\_1D\\CSV\_UseAnalysis\\MasterCSV\\All\_Glyco\\mgf\\ptm\\UC18ERLIC\_PTM\_35D.mgf

Click mouse within plot area to zoom in by factor of two about that point

Or, to Da

Label all possible matches Label matches used for scoring

Show Y-axis

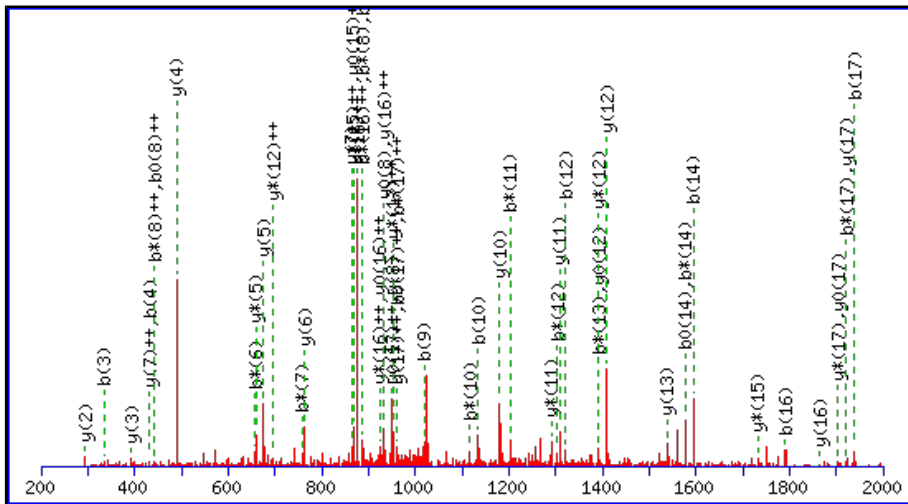

Monoisotopic mass of neutral peptide Mr(calc): 2082.9283

Fixed modifications: Carbamidomethyl (C) (apply to specified residues or termini only)

Variable modifications:

N10 : Deamidated (NQ)

Ions Score: 62 Expect: 8e-005

Matches : 56/180 fragment ions using 104 most intense peaks (help)

| #  | b         | b <sup>++</sup> | b <sup>*</sup> | b <sup>*++</sup> | b <sup>0</sup> | b <sup>0++</sup> | Seq. | y         | y <sup>++</sup> | y <sup>*</sup> | y <sup>*++</sup> | y <sup>0</sup> | y <sup>0++</sup> | #  |
|----|-----------|-----------------|----------------|------------------|----------------|------------------|------|-----------|-----------------|----------------|------------------|----------------|------------------|----|
| 1  | 164.0706  | 82.5389         |                |                  |                |                  | Y    |           |                 |                |                  |                |                  | 18 |
| 2  | 221.0921  | 111.0497        |                |                  |                |                  | G    | 1920.8722 | 960.9398        | 1903.8457      | 952.4265         | 1902.8617      | 951.9345         | 17 |
| 3  | 335.1350  | 168.0711        | 318.1084       | 159.5579         |                |                  | N    | 1863.8508 | 932.4290        | 1846.8242      | 923.9158         | 1845.8402      | 923.4237         | 16 |
| 4  | 432.1878  | 216.5975        | 415.1612       | 208.0842         |                |                  | P    | 1749.8079 | 875.4076        | 1732.7813      | 866.8943         | 1731.7973      | 866.4023         | 15 |
| 5  | 546.2307  | 273.6190        | 529.2041       | 265.1057         |                |                  | N    | 1652.7551 | 826.8812        | 1635.7285      | 818.3679         | 1634.7445      | 817.8759         | 14 |
| 6  | 675.2733  | 338.1403        | 658.2467       | 329.6270         | 657.2627       | 329.1350         | E    | 1538.7122 | 769.8597        | 1521.6856      | 761.3464         | 1520.7016      | 760.8544         | 13 |
| 7  | 776.3210  | 388.6641        | 759.2944       | 380.1508         | 758.3104       | 379.6588         | T    | 1409.6696 | 705.3384        | 1392.6430      | 696.8251         | 1391.6590      | 696.3331         | 12 |
| 8  | 904.3795  | 452.6934        | 887.3530       | 444.1801         | 886.3690       | 443.6881         | Q    | 1308.6219 | 654.8146        | 1291.5953      | 646.3013         | 1290.6113      | 645.8093         | 11 |
| 9  | 1018.4225 | 509.7149        | 1001.3959      | 501.2016         | 1000.4119      | 500.7096         | N    | 1180.5633 | 590.7853        | 1163.5368      | 582.2720         | 1162.5527      | 581.7800         | 10 |
| 10 | 1133.4494 | 567.2283        | 1116.4229      | 558.7151         | 1115.4388      | 558.2231         | N    | 1066.5204 | 533.7638        | 1049.4938      | 525.2506         | 1048.5098      | 524.7585         | 9  |
| 11 | 1220.4814 | 610.7444        | 1203.4549      | 602.2311         | 1202.4709      | 601.7391         | S    | 951.4934  | 476.2504        | 934.4669       | 467.7371         | 933.4829       | 467.2451         | 8  |
| 12 | 1321.5291 | 661.2682        | 1304.5026      | 652.7549         | 1303.5185      | 652.2629         | T    | 864.4614  | 432.7343        | 847.4349       | 424.2211         | 846.4509       | 423.7291         | 7  |
| 13 | 1408.5611 | 704.7842        | 1391.5346      | 696.2709         | 1390.5506      | 695.7789         | S    | 763.4137  | 382.2105        | 746.3872       | 373.6972         | 745.4032       | 373.2052         | 6  |
| 14 | 1594.6405 | 797.8239        | 1577.6139      | 789.3106         | 1576.6299      | 788.8186         | W    | 676.3817  | 338.6945        | 659.3552       | 330.1812         |                |                  | 5  |
| 15 | 1691.6932 | 846.3502        | 1674.6667      | 837.8370         | 1673.6827      | 837.3450         | P    | 490.3024  | 245.6548        | 473.2758       | 237.1416         |                |                  | 4  |
| 16 | 1790.7616 | 895.8845        | 1773.7351      | 887.3712         | 1772.7511      | 886.8792         | V    | 393.2496  | 197.1285        | 376.2231       | 188.6152         |                |                  | 3  |
| 17 | 1937.8300 | 969.4187        | 1920.8035      | 960.9054         | 1919.8195      | 960.4134         | F    | 294.1812  | 147.5942        | 277.1547       | 139.0810         |                |                  | 2  |
| 18 |           |                 |                |                  |                |                  | K    | 147.1128  | 74.0600         | 130.0863       | 65.5468          |                |                  | 1  |

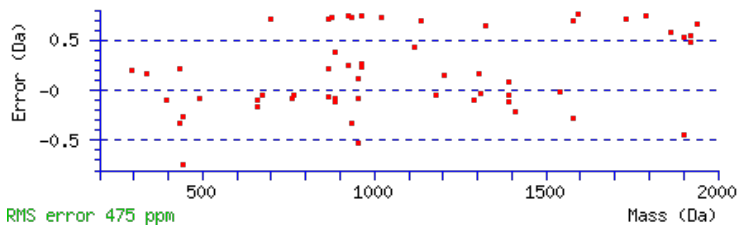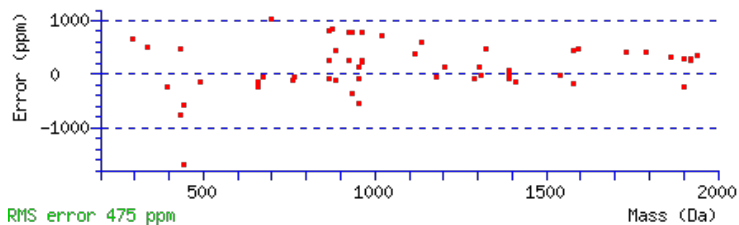

NCBI BLAST search of [YGNPNETQNNSTSWPVFK](#)

(Parameters: blastp, nr protein database, expect=20000, no filter, PAM30)

Other BLAST [web gateways](#)

**All matches to this query**

| Score | Mr(calc)  | Delta  | Sequence                              | Site Analysis         |
|-------|-----------|--------|---------------------------------------|-----------------------|
| 61.7  | 2082.9283 | 0.9969 | <a href="#">YGNPNETQNNSTSWPVFK</a>    | Deamidated N10 44.58% |
| 61.7  | 2082.9283 | 0.9969 | <a href="#">YGNPNETQNNSTSWPVFK</a>    | Deamidated N9 44.58%  |
| 54.4  | 2082.9283 | 0.9969 | <a href="#">YGNPNETQNNSTSWPVFK</a>    | Deamidated Q8 8.38%   |
| 48.9  | 2082.9283 | 0.9969 | <a href="#">YGNPNETQNNSTSWPVFK</a>    | Deamidated N5 2.35%   |
| 36.0  | 2082.9283 | 0.9969 | <a href="#">YGNPNETQNNSTSWPVFK</a>    | Deamidated N3 0.12%   |
| 3.8   | 2083.9166 | 0.0086 | <a href="#">EMDPAVNQTCTMESVAHK</a>    |                       |
| 3.8   | 2083.9150 | 0.0102 | <a href="#">ESANMKRNSDMQASELOK</a>    |                       |
| 3.5   | 2083.9191 | 0.0061 | <a href="#">GGYGGGMPANVQMQLVDTKAG</a> |                       |
| 3.5   | 2083.9191 | 0.0061 | <a href="#">GGYGGGMPANVQMQLVDTKAG</a> |                       |
| 3.3   | 2083.9190 | 0.0061 | <a href="#">SKWNDMLGMNESTAQQVK</a>    |                       |

Mascot: <http://www.matrixscience.com/>

# MATRIX SCIENCE Mascot Search Results

## Peptide View

MS/MS Fragmentation of **YGNNPNETQNNSTSWPVFK**

Found in **F8WF14** in **con\_Xuniprot\_HUMAN3**, F8WF14\_HUMAN Cholinesterase OS=Homo sapiens GN=BCHE PE=2 SV=1

Match to Query 13141: 2083.920822 from(695.647550,3+) intensity(8145.1313) rtinseconds(1529) scans(3460) index(28128)

Title: 111019\_Est\_MI\_YS\_G\_12Spectrum3028\_scans\_\_3460

Data file C:\\mascot\\20140703\_Tmgf\_1D\\CSV\_UseAnalysis\\MasterCSV\\All\_Glyco\\mgf\\ptm\\UC18ERLIC\_PTM\_35D.mgf

Click mouse within plot area to zoom in by factor of two about that point

Or, to Da

Label all possible matches Label matches used for scoring

Show Y-axis

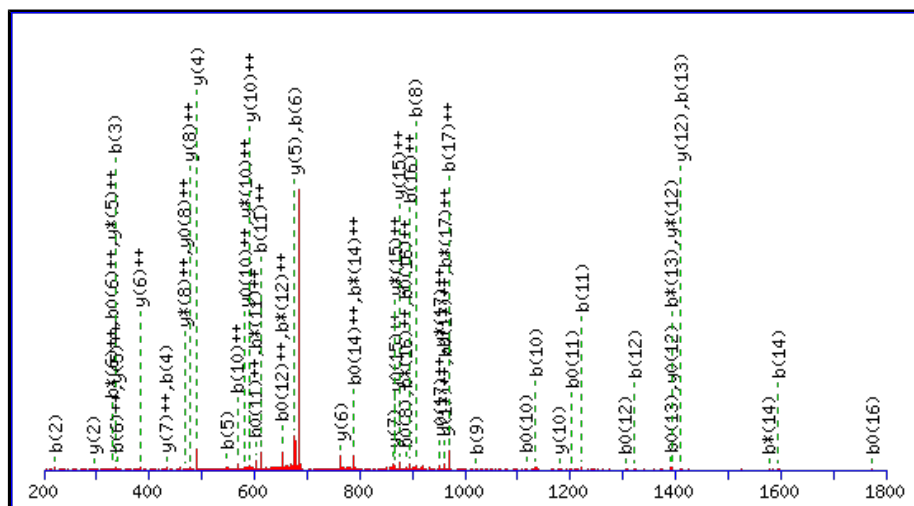

Monoisotopic mass of neutral peptide Mr(calc): 2083.9123

Fixed modifications: Carbamidomethyl (C) (apply to specified residues or termini only)

Variable modifications:

N5 : Deamidated (NQ)

Q8 : Deamidated (NQ)

Ions Score: 56 Expect: 0.0003

Matches : 62/180 fragment ions using 94 most intense peaks ([help](#))

| #  | b                | b <sup>++</sup> | b <sup>*</sup>   | b <sup>*++</sup> | b <sup>0</sup>   | b <sup>0++</sup> | Seq. | y                | y <sup>++</sup> | y <sup>*</sup>   | y <sup>*++</sup> | y <sup>0</sup>   | y <sup>0++</sup> | #  |
|----|------------------|-----------------|------------------|------------------|------------------|------------------|------|------------------|-----------------|------------------|------------------|------------------|------------------|----|
| 1  | 164.0706         | 82.5389         |                  |                  |                  |                  | Y    |                  |                 |                  |                  |                  |                  | 18 |
| 2  | <b>221.0921</b>  | 111.0497        |                  |                  |                  |                  | G    | 1921.8563        | <b>961.4318</b> | 1904.8297        | <b>952.9185</b>  | 1903.8457        | <b>952.4265</b>  | 17 |
| 3  | <b>335.1350</b>  | 168.0711        | 318.1084         | 159.5579         |                  |                  | N    | 1864.8348        | 932.9210        | 1847.8082        | 924.4078         | 1846.8242        | 923.9158         | 16 |
| 4  | <b>432.1878</b>  | 216.5975        | 415.1612         | 208.0842         |                  |                  | P    | 1750.7919        | <b>875.8996</b> | 1733.7653        | <b>867.3863</b>  | 1732.7813        | <b>866.8943</b>  | 15 |
| 5  | <b>547.2147</b>  | 274.1110        | 530.1882         | 265.5977         |                  |                  | N    | 1653.7391        | 827.3732        | 1636.7126        | 818.8599         | 1635.7285        | 818.3679         | 14 |
| 6  | <b>676.2573</b>  | <b>338.6323</b> | 659.2307         | <b>330.1190</b>  | 658.2467         | <b>329.6270</b>  | E    | 1538.7122        | 769.8597        | 1521.6856        | 761.3464         | 1520.7016        | 760.8544         | 13 |
| 7  | 777.3050         | 389.1561        | 760.2784         | 380.6429         | 759.2944         | 380.1508         | T    | <b>1409.6696</b> | 705.3384        | <b>1392.6430</b> | 696.8251         | <b>1391.6590</b> | 696.3331         | 12 |
| 8  | <b>906.3476</b>  | 453.6774        | 889.3210         | 445.1641         | <b>888.3370</b>  | 444.6721         | Q    | 1308.6219        | 654.8146        | 1291.5953        | 646.3013         | 1290.6113        | 645.8093         | 11 |
| 9  | <b>1020.3905</b> | 510.6989        | 1003.3639        | 502.1856         | 1002.3799        | 501.6936         | N    | <b>1179.5793</b> | <b>590.2933</b> | 1162.5527        | <b>581.7800</b>  | 1161.5687        | <b>581.2880</b>  | 10 |
| 10 | <b>1134.4334</b> | <b>567.7203</b> | 1117.4069        | 559.2071         | <b>1116.4229</b> | 558.7151         | N    | 1065.5364        | 533.2718        | 1048.5098        | 524.7585         | 1047.5258        | 524.2665         | 9  |
| 11 | <b>1221.4655</b> | <b>611.2364</b> | 1204.4389        | <b>602.7231</b>  | <b>1203.4549</b> | <b>602.2311</b>  | S    | 951.4934         | <b>476.2504</b> | 934.4669         | <b>467.7371</b>  | 933.4829         | <b>467.2451</b>  | 8  |
| 12 | <b>1322.5131</b> | 661.7602        | 1305.4866        | <b>653.2469</b>  | <b>1304.5026</b> | <b>652.7549</b>  | T    | <b>864.4614</b>  | <b>432.7343</b> | 847.4349         | 424.2211         | 846.4509         | 423.7291         | 7  |
| 13 | <b>1409.5452</b> | 705.2762        | <b>1392.5186</b> | 696.7629         | <b>1391.5346</b> | 696.2709         | S    | <b>763.4137</b>  | <b>382.2105</b> | 746.3872         | 373.6972         | 745.4032         | 373.2052         | 6  |
| 14 | <b>1595.6245</b> | 798.3159        | <b>1578.5979</b> | <b>789.8026</b>  | 1577.6139        | <b>789.3106</b>  | W    | <b>676.3817</b>  | <b>338.6945</b> | 659.3552         | <b>330.1812</b>  |                  |                  | 5  |
| 15 | 1692.6772        | 846.8423        | 1675.6507        | 838.3290         | 1674.6667        | 837.8370         | P    | <b>490.3024</b>  | 245.6548        | 473.2758         | 237.1416         |                  |                  | 4  |
| 16 | 1791.7456        | <b>896.3765</b> | 1774.7191        | <b>887.8632</b>  | <b>1773.7351</b> | <b>887.3712</b>  | V    | 393.2496         | 197.1285        | 376.2231         | 188.6152         |                  |                  | 3  |
| 17 | 1938.8141        | <b>969.9107</b> | 1921.7875        | <b>961.3974</b>  | 1920.8035        | <b>960.9054</b>  | F    | <b>294.1812</b>  | 147.5942        | 277.1547         | 139.0810         |                  |                  | 2  |
| 18 |                  |                 |                  |                  |                  |                  | K    | 147.1128         | 74.0600         | 130.0863         | 65.5468          |                  |                  | 1  |

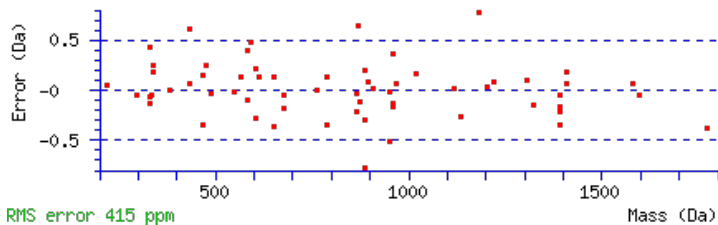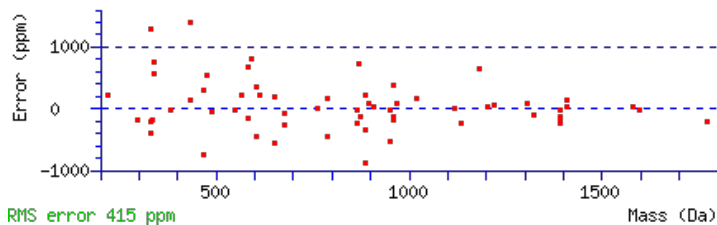

NCBI **BLAST** search of [YGNPNETQNNSTSWPVFK](#)

(Parameters: blastp, nr protein database, expect=20000, no filter, PAM30)

Other BLAST [web gateways](#)

**All matches to this query**

| Score | Mr(calc)  | Delta  | Sequence                           | Site Analysis             |
|-------|-----------|--------|------------------------------------|---------------------------|
| 55.7  | 2083.9123 | 0.0085 | <a href="#">YGNPNETQNNSTSWPVFK</a> | Deamidated N5, Q8 31.35%  |
| 54.9  | 2083.9123 | 0.0085 | <a href="#">YGNPNETQNNSTSWPVFK</a> | Deamidated N5, N9 26.13%  |
| 54.9  | 2083.9123 | 0.0085 | <a href="#">YGNPNETQNNSTSWPVFK</a> | Deamidated N5, N10 26.13% |
| 45.5  | 2083.9123 | 0.0085 | <a href="#">YGNPNETQNNSTSWPVFK</a> | Deamidated Q8, N9 3.04%   |
| 45.5  | 2083.9123 | 0.0085 | <a href="#">YGNPNETQNNSTSWPVFK</a> | Deamidated Q8, N10 3.04%  |
| 44.5  | 2083.9123 | 0.0085 | <a href="#">YGNPNETQNNSTSWPVFK</a> | Deamidated N3, N5 2.39%   |
| 44.5  | 2083.9123 | 0.0085 | <a href="#">YGNPNETQNNSTSWPVFK</a> | Deamidated N3, Q8 2.38%   |
| 43.5  | 2083.9123 | 0.0085 | <a href="#">YGNPNETQNNSTSWPVFK</a> | Deamidated N3, N9 1.89%   |
| 43.5  | 2083.9123 | 0.0085 | <a href="#">YGNPNETQNNSTSWPVFK</a> | Deamidated N3, N10 1.89%  |
| 43.2  | 2083.9123 | 0.0085 | <a href="#">YGNPNETQNNSTSWPVFK</a> | Deamidated N9, N10 1.76%  |

Mascot: <http://www.matrixscience.com/>

# MATRIX SCIENCE Mascot Search Results

## Peptide View

MS/MS Fragmentation of **YGPNNETQNNSTSWPVFK**

Found in **F8WF14** in **con\_Xuniprot\_HUMAN3**, F8WF14\_HUMAN Cholinesterase OS=Homo sapiens GN=BCHE PE=2 SV=1

Match to Query 13167: 2084.906748 from(1043.460650,2+) intensity(433.7465) rtinseconds(1539) scans(2966) index(549)

Title: 111019\_Est\_ISCardio\_NMI\_200000g\_G\_7Spectrum2514\_scans\_\_2966

Data file C:\\mascot\\20140703\_Tmgf\_1D\\CSV\_UseAnalysis\\MasterCSV\\All\_Glyco\\mgf\\ptm\\UC18ERLIC\_PTM\_35D.mgf

Click mouse within plot area to zoom in by factor of two about that point

Or, to Da

Label all possible matches Label matches used for scoring

Show Y-axis

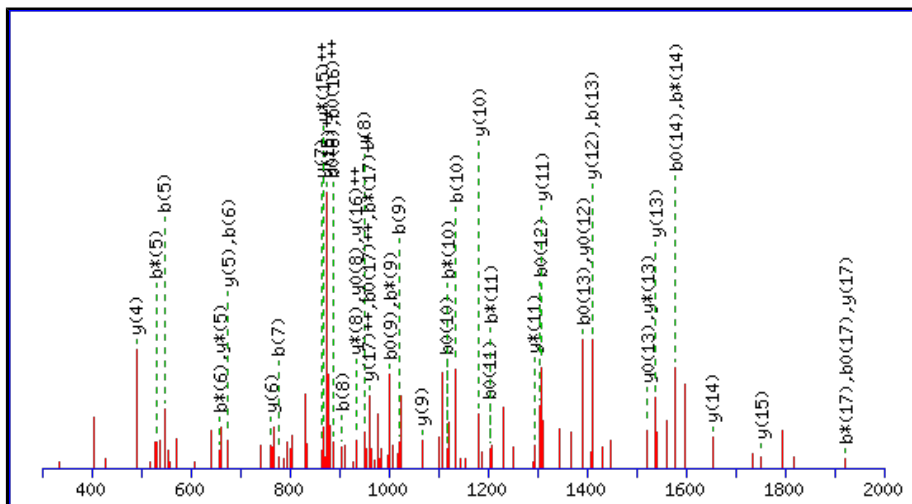

Monoisotopic mass of neutral peptide Mr(calc): 2084.8963

Fixed modifications: Carbamidomethyl (C) (apply to specified residues or termini only)

Variable modifications:

N5 : Deamidated (NQ)

N9 : Deamidated (NQ)

N10 : Deamidated (NQ)

Ions Score: 55 Expect: 0.00032

Matches : 49/180 fragment ions using 101 most intense peaks ([help](#))

| #  | b         | b <sup>++</sup> | b <sup>*</sup> | b <sup>*++</sup> | b <sup>0</sup> | b <sup>0++</sup> | Seq. | y         | y <sup>++</sup> | y <sup>*</sup> | y <sup>*++</sup> | y <sup>0</sup> | y <sup>0++</sup> | #  |
|----|-----------|-----------------|----------------|------------------|----------------|------------------|------|-----------|-----------------|----------------|------------------|----------------|------------------|----|
| 1  | 164.0706  | 82.5389         |                |                  |                |                  | Y    |           |                 |                |                  |                |                  | 18 |
| 2  | 221.0921  | 111.0497        |                |                  |                |                  | G    | 1922.8403 | 961.9238        | 1905.8137      | 953.4105         | 1904.8297      | 952.9185         | 17 |
| 3  | 335.1350  | 168.0711        | 318.1084       | 159.5579         |                |                  | N    | 1865.8188 | 933.4130        | 1848.7923      | 924.8998         | 1847.8082      | 924.4078         | 16 |
| 4  | 432.1878  | 216.5975        | 415.1612       | 208.0842         |                |                  | P    | 1751.7759 | 876.3916        | 1734.7493      | 867.8783         | 1733.7653      | 867.3863         | 15 |
| 5  | 547.2147  | 274.1110        | 530.1882       | 265.5977         |                |                  | N    | 1654.7231 | 827.8652        | 1637.6966      | 819.3519         | 1636.7126      | 818.8599         | 14 |
| 6  | 676.2573  | 338.6323        | 659.2307       | 330.1190         | 658.2467       | 329.6270         | E    | 1539.6962 | 770.3517        | 1522.6696      | 761.8385         | 1521.6856      | 761.3464         | 13 |
| 7  | 777.3050  | 389.1561        | 760.2784       | 380.6429         | 759.2944       | 380.1508         | T    | 1410.6536 | 705.8304        | 1393.6270      | 697.3172         | 1392.6430      | 696.8251         | 12 |
| 8  | 905.3636  | 453.1854        | 888.3370       | 444.6721         | 887.3530       | 444.1801         | Q    | 1309.6059 | 655.3066        | 1292.5794      | 646.7933         | 1291.5953      | 646.3013         | 11 |
| 9  | 1020.3905 | 510.6989        | 1003.3639      | 502.1856         | 1002.3799      | 501.6936         | N    | 1181.5473 | 591.2773        | 1164.5208      | 582.7640         | 1163.5368      | 582.2720         | 10 |
| 10 | 1135.4174 | 568.2124        | 1118.3909      | 559.6991         | 1117.4069      | 559.2071         | N    | 1066.5204 | 533.7638        | 1049.4938      | 525.2506         | 1048.5098      | 524.7585         | 9  |
| 11 | 1222.4495 | 611.7284        | 1205.4229      | 603.2151         | 1204.4389      | 602.7231         | S    | 951.4934  | 476.2504        | 934.4669       | 467.7371         | 933.4829       | 467.2451         | 8  |
| 12 | 1323.4971 | 662.2522        | 1306.4706      | 653.7389         | 1305.4866      | 653.2469         | T    | 864.4614  | 432.7343        | 847.4349       | 424.2211         | 846.4509       | 423.7291         | 7  |
| 13 | 1410.5292 | 705.7682        | 1393.5026      | 697.2550         | 1392.5186      | 696.7629         | S    | 763.4137  | 382.2105        | 746.3872       | 373.6972         | 745.4032       | 373.2052         | 6  |
| 14 | 1596.6085 | 798.8079        | 1579.5819      | 790.2946         | 1578.5979      | 789.8026         | W    | 676.3817  | 338.6945        | 659.3552       | 330.1812         |                |                  | 5  |
| 15 | 1693.6613 | 847.3343        | 1676.6347      | 838.8210         | 1675.6507      | 838.3290         | P    | 490.3024  | 245.6548        | 473.2758       | 237.1416         |                |                  | 4  |
| 16 | 1792.7297 | 896.8685        | 1775.7031      | 888.3552         | 1774.7191      | 887.8632         | V    | 393.2496  | 197.1285        | 376.2231       | 188.6152         |                |                  | 3  |
| 17 | 1939.7981 | 970.4027        | 1922.7715      | 961.8894         | 1921.7875      | 961.3974         | F    | 294.1812  | 147.5942        | 277.1547       | 139.0810         |                |                  | 2  |
| 18 |           |                 |                |                  |                |                  | K    | 147.1128  | 74.0600         | 130.0863       | 65.5468          |                |                  | 1  |

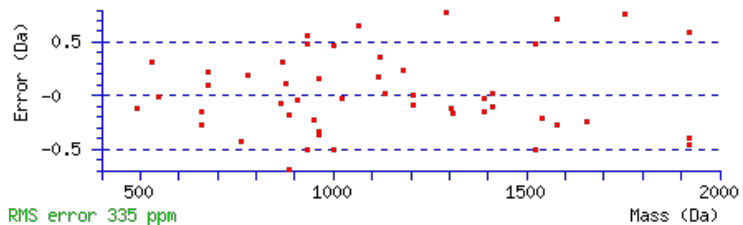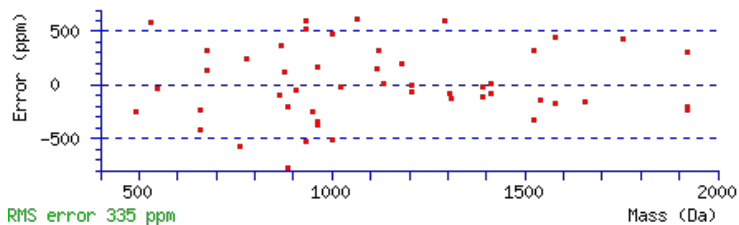

NCBI BLAST search of [YGNPNETQNNSTSWPVFK](#)

(Parameters: blastp, nr protein database, expect=20000, no filter, PAM30)

Other BLAST [web gateways](#)

All matches to this query

| Score | Mr(calc)  | Delta  | Sequence                           | Site Analysis                 |
|-------|-----------|--------|------------------------------------|-------------------------------|
| 54.6  | 2084.8963 | 0.0104 | <a href="#">YGNPNETQNNSTSWPVFK</a> | Deamidated N5, N9, N10 58.33% |
| 51.2  | 2084.8963 | 0.0104 | <a href="#">YGNPNETQNNSTSWPVFK</a> | Deamidated Q8, N9, N10 26.60% |
| 45.5  | 2084.8963 | 0.0104 | <a href="#">YGNPNETQNNSTSWPVFK</a> | Deamidated N3, N9, N10 7.26%  |
| 44.7  | 2084.8963 | 0.0104 | <a href="#">YGNPNETQNNSTSWPVFK</a> | Deamidated N5, Q8, N10 5.97%  |
| 36.5  | 2084.8963 | 0.0104 | <a href="#">YGNPNETQNNSTSWPVFK</a> | Deamidated N3, Q8, N10 0.91%  |
| 35.7  | 2084.8963 | 0.0104 | <a href="#">YGNPNETQNNSTSWPVFK</a> | Deamidated N5, Q8, N9 0.75%   |
| 28.4  | 2084.8963 | 0.0104 | <a href="#">YGNPNETQNNSTSWPVFK</a> | Deamidated N3, Q8, N9 0.14%   |
| 24.4  | 2083.9123 | 0.9945 | <a href="#">YGNPNETQNNSTSWPVFK</a> |                               |
| 20.7  | 2084.8963 | 0.0104 | <a href="#">YGNPNETQNNSTSWPVFK</a> | Deamidated N3, N5, N10 0.02%  |
| 18.3  | 2083.9123 | 0.9945 | <a href="#">YGNPNETQNNSTSWPVFK</a> |                               |

Mascot: <http://www.matrixscience.com/>

# MATRIX SCIENCE Mascot Search Results

## Peptide View

MS/MS Fragmentation of **YGPNNETQNNSTSWPVFK**

Found in **F8WF14** in **con\_Xuniprot\_HUMAN3**, F8WF14\_HUMAN Cholinesterase OS=Homo sapiens GN=BCHE PE=2 SV=1

Match to Query 13146: 2083.924188 from(1042.969370,2+) intensity(8984.1543) rtinseconds(1532) scans(3675) index(20287)

Title: 111019\_Est\_MI\_YP\_G\_10Spectrum3207\_scans\_\_3675

Data file C:\\mascot\\20140703\_Tmgf\_1D\\CSV\_UseAnalysis\\MasterCSV\\All\_Glyco\\mgf\\ptm\\UC18ERLIC\_PTM\_35D.mgf

Click mouse within plot area to zoom in by factor of two about that point

Or, to Da

Label all possible matches Label matches used for scoring

Show Y-axis

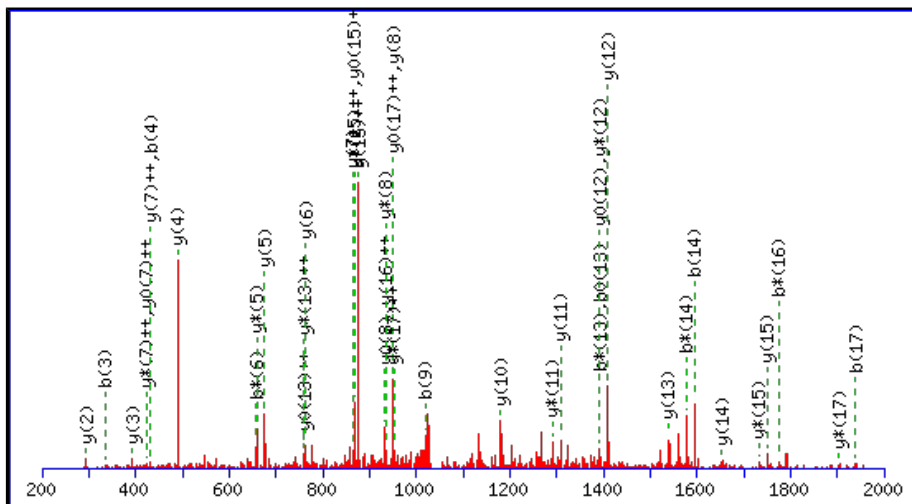

Monoisotopic mass of neutral peptide Mr(calc): 2082.9283

Fixed modifications: Carbamidomethyl (C) (apply to specified residues or termini only)

Variable modifications:

N9 : Deamidated (NQ)

Ions Score: 52 Expect: 0.00077

Matches : 42/180 fragment ions using 102 most intense peaks (help)

| #  | b                | b <sup>++</sup> | b <sup>*</sup>   | b <sup>*++</sup> | b <sup>0</sup>   | b <sup>0++</sup> | Seq. | y                | y <sup>++</sup> | y <sup>*</sup>   | y <sup>*++</sup> | y <sup>0</sup>   | y <sup>0++</sup> | #  |
|----|------------------|-----------------|------------------|------------------|------------------|------------------|------|------------------|-----------------|------------------|------------------|------------------|------------------|----|
| 1  | 164.0706         | 82.5389         |                  |                  |                  |                  | Y    |                  |                 |                  |                  |                  |                  | 18 |
| 2  | 221.0921         | 111.0497        |                  |                  |                  |                  | G    | 1920.8722        | 960.9398        | 1903.8457        | 952.4265         | 1902.8617        | 951.9345         | 17 |
| 3  | <b>335.1350</b>  | 168.0711        | 318.1084         | 159.5579         |                  |                  | N    | 1863.8508        | 932.4290        | 1846.8242        | 923.9158         | 1845.8402        | 923.4237         | 16 |
| 4  | <b>432.1878</b>  | 216.5975        | 415.1612         | 208.0842         |                  |                  | P    | <b>1749.8079</b> | <b>875.4076</b> | <b>1732.7813</b> | <b>866.8943</b>  | 1731.7973        | <b>866.4023</b>  | 15 |
| 5  | 546.2307         | 273.6190        | 529.2041         | 265.1057         |                  |                  | N    | <b>1652.7551</b> | 826.8812        | 1635.7285        | 818.3679         | 1634.7445        | 817.8759         | 14 |
| 6  | 675.2733         | 338.1403        | <b>658.2467</b>  | 329.6270         | 657.2627         | 329.1350         | E    | <b>1538.7122</b> | 769.8597        | 1521.6856        | <b>761.3464</b>  | 1520.7016        | <b>760.8544</b>  | 13 |
| 7  | 776.3210         | 388.6641        | 759.2944         | 380.1508         | 758.3104         | 379.6588         | T    | <b>1409.6696</b> | 705.3384        | <b>1392.6430</b> | 696.8251         | <b>1391.6590</b> | 696.3331         | 12 |
| 8  | 904.3795         | 452.6934        | 887.3530         | 444.1801         | 886.3690         | 443.6881         | Q    | <b>1308.6219</b> | 654.8146        | <b>1291.5953</b> | 646.3013         | 1290.6113        | 645.8093         | 11 |
| 9  | <b>1019.4065</b> | 510.2069        | 1002.3799        | 501.6936         | 1001.3959        | 501.2016         | N    | <b>1180.5633</b> | 590.7853        | 1163.5368        | 582.2720         | 1162.5527        | 581.7800         | 10 |
| 10 | 1133.4494        | 567.2283        | 1116.4229        | 558.7151         | 1115.4388        | 558.2231         | N    | 1065.5364        | 533.2718        | 1048.5098        | 524.7585         | 1047.5258        | 524.2665         | 9  |
| 11 | 1220.4814        | 610.7444        | 1203.4549        | 602.2311         | 1202.4709        | 601.7391         | S    | <b>951.4934</b>  | 476.2504        | <b>934.4669</b>  | 467.7371         | <b>933.4829</b>  | 467.2451         | 8  |
| 12 | 1321.5291        | 661.2682        | 1304.5026        | 652.7549         | 1303.5185        | 652.2629         | T    | <b>864.4614</b>  | <b>432.7343</b> | 847.4349         | <b>424.2211</b>  | 846.4509         | <b>423.7291</b>  | 7  |
| 13 | 1408.5611        | 704.7842        | <b>1391.5346</b> | 696.2709         | <b>1390.5506</b> | 695.7789         | S    | <b>763.4137</b>  | 382.2105        | 746.3872         | 373.6972         | 745.4032         | 373.2052         | 6  |
| 14 | <b>1594.6405</b> | 797.8239        | <b>1577.6139</b> | 789.3106         | 1576.6299        | 788.8186         | W    | <b>676.3817</b>  | 338.6945        | <b>659.3552</b>  | 330.1812         |                  |                  | 5  |
| 15 | 1691.6932        | 846.3502        | 1674.6667        | 837.8370         | 1673.6827        | 837.3450         | P    | <b>490.3024</b>  | 245.6548        | 473.2758         | 237.1416         |                  |                  | 4  |
| 16 | 1790.7616        | 895.8845        | <b>1773.7351</b> | 887.3712         | 1772.7511        | 886.8792         | V    | <b>393.2496</b>  | 197.1285        | 376.2231         | 188.6152         |                  |                  | 3  |
| 17 | <b>1937.8300</b> | 969.4187        | 1920.8035        | 960.9054         | 1919.8195        | 960.4134         | F    | <b>294.1812</b>  | 147.5942        | 277.1547         | 139.0810         |                  |                  | 2  |
| 18 |                  |                 |                  |                  |                  |                  | K    | 147.1128         | 74.0600         | 130.0863         | 65.5468          |                  |                  | 1  |



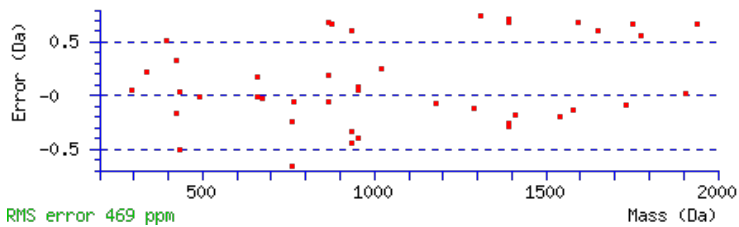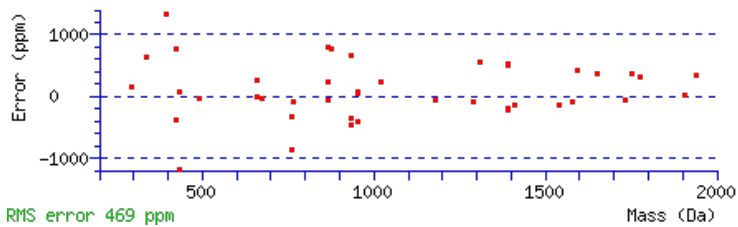

NCBI **BLAST** search of [YGNPNETQNNSTSWPVFK](#)

(Parameters: blastp, nr protein database, expect=20000, no filter, PAM30)

Other BLAST [web gateways](#)

**All matches to this query**

| Score | Mr(calc)  | Delta   | Sequence                            | Site Analysis         |
|-------|-----------|---------|-------------------------------------|-----------------------|
| 51.7  | 2082.9283 | 0.9959  | <a href="#">YGNPNETQNNSTSWPVFK</a>  | Deamidated N9 49.54%  |
| 50.6  | 2082.9283 | 0.9959  | <a href="#">YGNPNETQNNSTSWPVFK</a>  | Deamidated N10 38.73% |
| 42.8  | 2082.9283 | 0.9959  | <a href="#">YGNPNETQNNSTSWPVFK</a>  | Deamidated Q8 6.44%   |
| 41.8  | 2082.9283 | 0.9959  | <a href="#">YGNPNETQNNSTSWPVFK</a>  | Deamidated N5 5.14%   |
| 26.4  | 2082.9283 | 0.9959  | <a href="#">YGNPNETQNNSTSWPVFK</a>  | Deamidated N3 0.15%   |
| 5.9   | 2083.9341 | -0.0099 | <a href="#">MQDVQGPRPGSPGDAEDRR</a> |                       |
| 5.4   | 2083.9150 | 0.0092  | <a href="#">ESANMKRNSDMQASELQK</a>  |                       |
| 5.3   | 2083.9150 | 0.0092  | <a href="#">ESANMKRNSDMQASELQK</a>  |                       |
| 3.1   | 2083.9341 | -0.0099 | <a href="#">MQDVQGPRPGSPGDAEDRR</a> |                       |
| 1.7   | 2083.9190 | 0.0052  | <a href="#">SKWNDMLGMNESTAQQVK</a>  |                       |

Mascot: <http://www.matrixscience.com/>

# MATRIX SCIENCE Mascot Search Results

## Peptide View

MS/MS Fragmentation of **YGNNPNETQNNSTSWPVFK**

Found in **F8WF14** in **con\_Xuniprot\_HUMAN3**, F8WF14\_HUMAN Cholinesterase OS=Homo sapiens GN=BCHE PE=2 SV=1

Match to Query 13133: 2083.917462 from(695.646430,3+) intensity(4435.8115) rtinseconds(1508) scans(3406) index(28126)

Title: 111019\_Est\_MI\_YS\_G\_12Spectrum2979\_scans\_\_3406

Data file C:\\mascot\\20140703\_Tmgf\_1D\\CSV\_UseAnalysis\\MasterCSV\\All\_Glyco\\mgf\\ptm\\UC18ERLIC\_PTM\_35D.mgf

Click mouse within plot area to zoom in by factor of two about that point

Or, to Da

Label all possible matches Label matches used for scoring

Show Y-axis

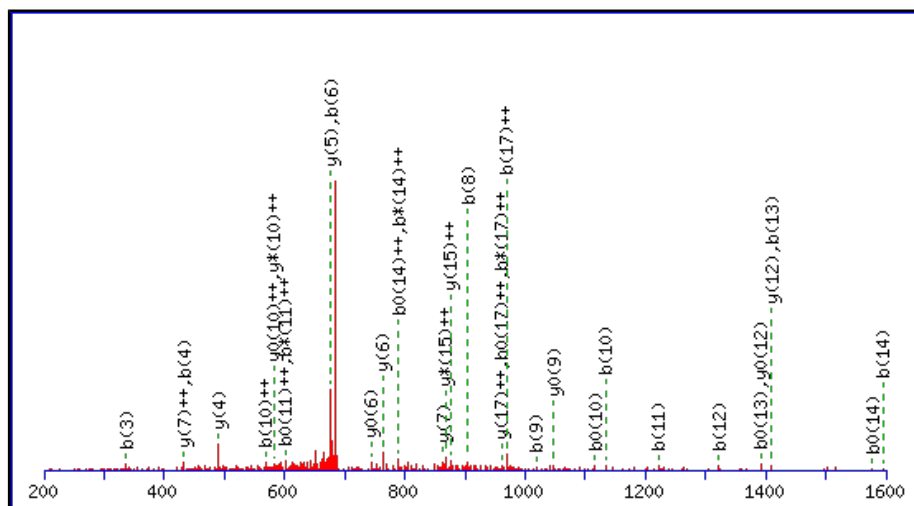

Monoisotopic mass of neutral peptide Mr(calc): 2083.9123

Fixed modifications: Carbamidomethyl (C) (apply to specified residues or termini only)

Variable modifications:

N3 : Deamidated (NQ)

N10 : Deamidated (NQ)

Ions Score: 41 Expect: 0.008

Matches : 35/180 fragment ions using 54 most intense peaks ([help](#))

| #  | b                | b <sup>++</sup> | b*        | b <sup>+++</sup> | b <sup>0</sup>   | b <sup>0++</sup> | Seq. | y                | y <sup>++</sup> | y*        | y <sup>+++</sup> | y <sup>0</sup>   | y <sup>0++</sup> | #  |
|----|------------------|-----------------|-----------|------------------|------------------|------------------|------|------------------|-----------------|-----------|------------------|------------------|------------------|----|
| 1  | 164.0706         | 82.5389         |           |                  |                  |                  | Y    |                  |                 |           |                  |                  |                  | 18 |
| 2  | 221.0921         | 111.0497        |           |                  |                  |                  | G    | 1921.8563        | 961.4318        | 1904.8297 | 952.9185         | 1903.8457        | 952.4265         | 17 |
| 3  | <b>336.1190</b>  | 168.5631        | 319.0925  | 160.0499         |                  |                  | N    | 1864.8348        | 932.9210        | 1847.8082 | 924.4078         | 1846.8242        | 923.9158         | 16 |
| 4  | <b>433.1718</b>  | 217.0895        | 416.1452  | 208.5763         |                  |                  | P    | 1749.8079        | <b>875.4076</b> | 1732.7813 | <b>866.8943</b>  | 1731.7973        | 866.4023         | 15 |
| 5  | 547.2147         | 274.1110        | 530.1882  | 265.5977         |                  |                  | N    | 1652.7551        | 826.8812        | 1635.7285 | 818.3679         | 1634.7445        | 817.8759         | 14 |
| 6  | <b>676.2573</b>  | 338.6323        | 659.2307  | 330.1190         | 658.2467         | 329.6270         | E    | 1538.7122        | 769.8597        | 1521.6856 | 761.3464         | 1520.7016        | 760.8544         | 13 |
| 7  | 777.3050         | 389.1561        | 760.2784  | 380.6429         | 759.2944         | 380.1508         | T    | <b>1409.6696</b> | 705.3384        | 1392.6430 | 696.8251         | <b>1391.6590</b> | 696.3331         | 12 |
| 8  | <b>905.3636</b>  | 453.1854        | 888.3370  | 444.6721         | 887.3530         | 444.1801         | Q    | 1308.6219        | 654.8146        | 1291.5953 | 646.3013         | 1290.6113        | 645.8093         | 11 |
| 9  | <b>1019.4065</b> | 510.2069        | 1002.3799 | 501.6936         | 1001.3959        | 501.2016         | N    | 1180.5633        | 590.7853        | 1163.5368 | <b>582.2720</b>  | 1162.5527        | <b>581.7800</b>  | 10 |
| 10 | <b>1134.4334</b> | <b>567.7203</b> | 1117.4069 | 559.2071         | <b>1116.4229</b> | 558.7151         | N    | 1066.5204        | 533.7638        | 1049.4938 | 525.2506         | <b>1048.5098</b> | 524.7585         | 9  |
| 11 | <b>1221.4655</b> | 611.2364        | 1204.4389 | <b>602.7231</b>  | 1203.4549        | <b>602.2311</b>  | S    | 951.4934         | 476.2504        | 934.4669  | 467.7371         | 933.4829         | 467.2451         | 8  |
| 12 | <b>1322.5131</b> | 661.7602        | 1305.4866 | 653.2469         | 1304.5026        | 652.7549         | T    | <b>864.4614</b>  | <b>432.7343</b> | 847.4349  | 424.2211         | 846.4509         | 423.7291         | 7  |
| 13 | <b>1409.5452</b> | 705.2762        | 1392.5186 | 696.7629         | <b>1391.5346</b> | 696.2709         | S    | <b>763.4137</b>  | 382.2105        | 746.3872  | 373.6972         | <b>745.4032</b>  | 373.2052         | 6  |
| 14 | <b>1595.6245</b> | 798.3159        | 1578.5979 | <b>789.8026</b>  | <b>1577.6139</b> | <b>789.3106</b>  | W    | <b>676.3817</b>  | 338.6945        | 659.3552  | 330.1812         |                  |                  | 5  |
| 15 | 1692.6772        | 846.8423        | 1675.6507 | 838.3290         | 1674.6667        | 837.8370         | P    | <b>490.3024</b>  | 245.6548        | 473.2758  | 237.1416         |                  |                  | 4  |
| 16 | 1791.7456        | 896.3765        | 1774.7191 | 887.8632         | 1773.7351        | 887.3712         | V    | 393.2496         | 197.1285        | 376.2231  | 188.6152         |                  |                  | 3  |
| 17 | 1938.8141        | <b>969.9107</b> | 1921.7875 | <b>961.3974</b>  | 1920.8035        | <b>960.9054</b>  | F    | 294.1812         | 147.5942        | 277.1547  | 139.0810         |                  |                  | 2  |
| 18 |                  |                 |           |                  |                  |                  | K    | 147.1128         | 74.0600         | 130.0863  | 65.5468          |                  |                  | 1  |

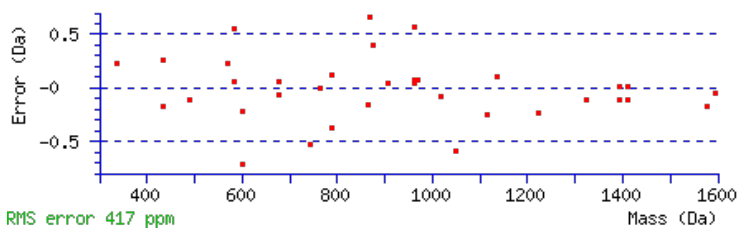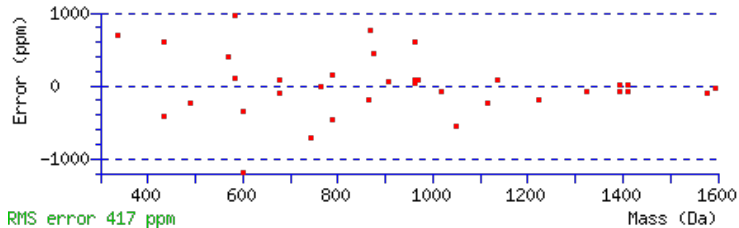

NCBI **BLAST** search of [YGNPNETQNNSTSWPVFK](#)

(Parameters: blastp, nr protein database, expect=20000, no filter, PAM30)

Other BLAST [web gateways](#)

**All matches to this query**

| Score | Mr(calc)  | Delta  | Sequence                           | Site Analysis             |
|-------|-----------|--------|------------------------------------|---------------------------|
| 41.1  | 2083.9123 | 0.0052 | <a href="#">YGNPNETQNNSTSWPVFK</a> | Deamidated N3, N10 43.86% |
| 39.2  | 2083.9123 | 0.0052 | <a href="#">YGNPNETQNNSTSWPVFK</a> | Deamidated N3, N9 28.45%  |
| 33.4  | 2083.9123 | 0.0052 | <a href="#">YGNPNETQNNSTSWPVFK</a> | Deamidated N5, N10 7.38%  |
| 32.5  | 2083.9123 | 0.0052 | <a href="#">YGNPNETQNNSTSWPVFK</a> | Deamidated N3, N5 6.05%   |
| 31.4  | 2083.9123 | 0.0052 | <a href="#">YGNPNETQNNSTSWPVFK</a> | Deamidated N5, N9 4.69%   |
| 29.8  | 2083.9123 | 0.0052 | <a href="#">YGNPNETQNNSTSWPVFK</a> | Deamidated N3, Q8 3.24%   |
| 28.1  | 2083.9123 | 0.0052 | <a href="#">YGNPNETQNNSTSWPVFK</a> | Deamidated N5, Q8 2.18%   |
| 27.0  | 2083.9123 | 0.0052 | <a href="#">YGNPNETQNNSTSWPVFK</a> | Deamidated Q8, N10 1.71%  |
| 26.3  | 2083.9123 | 0.0052 | <a href="#">YGNPNETQNNSTSWPVFK</a> | Deamidated Q8, N9 1.44%   |
| 24.7  | 2083.9123 | 0.0052 | <a href="#">YGNPNETQNNSTSWPVFK</a> | Deamidated N9, N10 1.00%  |

Mascot: <http://www.matrixscience.com/>

# MATRIX SCIENCE Mascot Search Results

## Peptide View

MS/MS Fragmentation of **AQLLQGLGFNLTER**

Found in **G3V350** in **con\_Xuniprot\_HUMAN3**, G3V350\_HUMAN Corticosteroid-binding globulin OS=Homo sapiens GN=SERPINA6 PE=3 SV=1

Match to Query 7165: 1559.834908 from(780.924730,2+) intensity(379997.0938) rtinseconds(2144) scans(5559) index(26881)

Title: 111019\_Est\_MI\_YS\_G\_09Spectrum4848\_scans\_5559

Data file C:\\mascot\\20140703\_Tmgf\_1D\\CSV\_UseAnalysis\\MasterCSV\\All\_Glyco\\mgf\\ptm\\UC18ERLIC\_PTM\_35D.mgf

Click mouse within plot area to zoom in by factor of two about that point

Or, to Da

Label all possible matches Label matches used for scoring

Show Y-axis

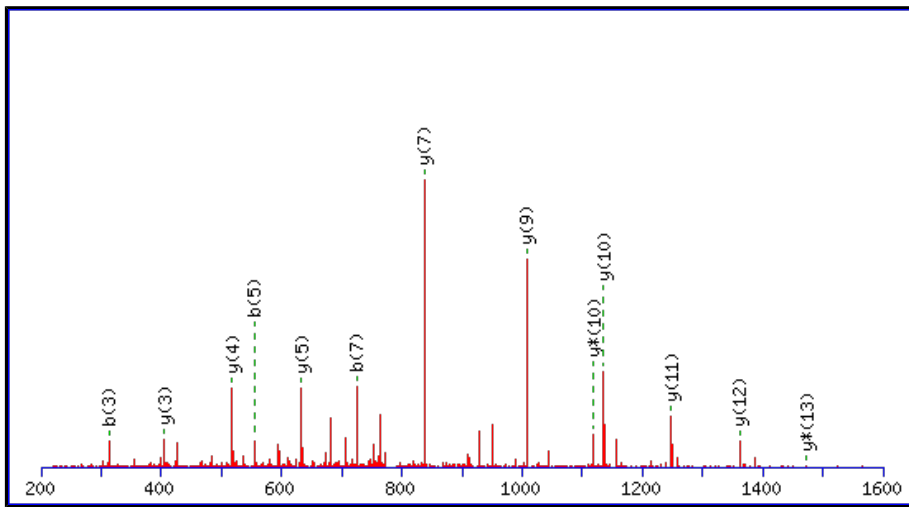

Monoisotopic mass of neutral peptide Mr(calc): 1559.8307

Fixed modifications: Carbamidomethyl (C) (apply to specified residues or termini only)

Variable modifications:

N10 : Deamidated (NQ)

Ions Score: 81 Expect: 1.6e-006

Matches : 13/130 fragment ions using 14 most intense peaks ([help](#))

| #  | b         | b <sup>++</sup> | b <sup>*</sup> | b <sup>***</sup> | b <sup>0</sup> | b <sup>0++</sup> | Seq. | y         | y <sup>++</sup> | y <sup>*</sup> | y <sup>***</sup> | y <sup>0</sup> | y <sup>0++</sup> | #  |
|----|-----------|-----------------|----------------|------------------|----------------|------------------|------|-----------|-----------------|----------------|------------------|----------------|------------------|----|
| 1  | 72.0444   | 36.5258         |                |                  |                |                  | A    |           |                 |                |                  |                |                  | 14 |
| 2  | 200.1030  | 100.5551        | 183.0764       | 92.0418          |                |                  | Q    | 1489.8009 | 745.4041        | 1472.7744      | 736.8908         | 1471.7904      | 736.3988         | 13 |
| 3  | 313.1870  | 157.0972        | 296.1605       | 148.5839         |                |                  | L    | 1361.7423 | 681.3748        | 1344.7158      | 672.8615         | 1343.7318      | 672.3695         | 12 |
| 4  | 426.2711  | 213.6392        | 409.2445       | 205.1259         |                |                  | L    | 1248.6583 | 624.8328        | 1231.6317      | 616.3195         | 1230.6477      | 615.8275         | 11 |
| 5  | 554.3297  | 277.6685        | 537.3031       | 269.1552         |                |                  | Q    | 1135.5742 | 568.2907        | 1118.5477      | 559.7775         | 1117.5636      | 559.2855         | 10 |
| 6  | 611.3511  | 306.1792        | 594.3246       | 297.6659         |                |                  | G    | 1007.5156 | 504.2615        | 990.4891       | 495.7482         | 989.5051       | 495.2562         | 9  |
| 7  | 724.4352  | 362.7212        | 707.4087       | 354.2080         |                |                  | L    | 950.4942  | 475.7507        | 933.4676       | 467.2374         | 932.4836       | 466.7454         | 8  |
| 8  | 781.4567  | 391.2320        | 764.4301       | 382.7187         |                |                  | G    | 837.4101  | 419.2087        | 820.3836       | 410.6954         | 819.3995       | 410.2034         | 7  |
| 9  | 928.5251  | 464.7662        | 911.4985       | 456.2529         |                |                  | F    | 780.3886  | 390.6980        | 763.3621       | 382.1847         | 762.3781       | 381.6927         | 6  |
| 10 | 1043.5520 | 522.2796        | 1026.5255      | 513.7664         |                |                  | N    | 633.3202  | 317.1638        | 616.2937       | 308.6505         | 615.3097       | 308.1585         | 5  |
| 11 | 1156.6361 | 578.8217        | 1139.6095      | 570.3084         |                |                  | L    | 518.2933  | 259.6503        | 501.2667       | 251.1370         | 500.2827       | 250.6450         | 4  |
| 12 | 1257.6838 | 629.3455        | 1240.6572      | 620.8322         | 1239.6732      | 620.3402         | T    | 405.2092  | 203.1082        | 388.1827       | 194.5950         | 387.1987       | 194.1030         | 3  |
| 13 | 1386.7264 | 693.8668        | 1369.6998      | 685.3535         | 1368.7158      | 684.8615         | E    | 304.1615  | 152.5844        | 287.1350       | 144.0711         | 286.1510       | 143.5791         | 2  |
| 14 |           |                 |                |                  |                |                  | R    | 175.1190  | 88.0631         | 158.0924       | 79.5498          |                |                  | 1  |

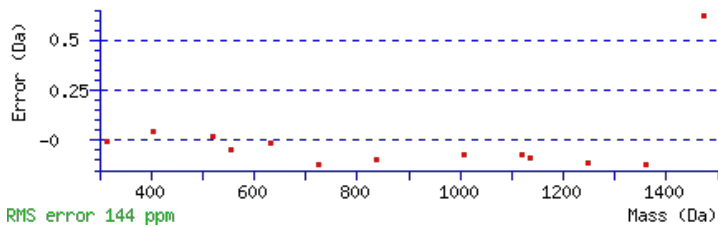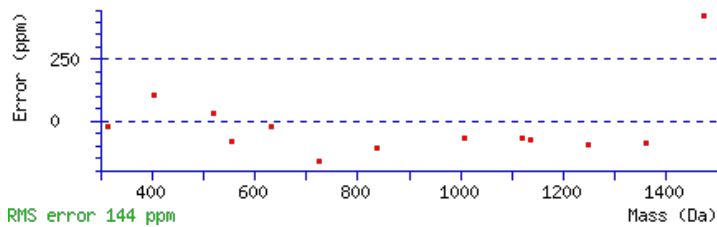

NCBI BLAST search of [AQLLQGLGFNLTER](#)

(Parameters: blastp, nr protein database, expect=20000, no filter, PAM30)

Other BLAST [web gateways](#)

**All matches to this query**

| Score | Mr(calc)  | Delta   | Sequence                        | Site Analysis          |
|-------|-----------|---------|---------------------------------|------------------------|
| 81.2  | 1559.8307 | 0.0042  | <a href="#">AQLLQGLGFNLTER</a>  | Deamidated N10 100.00% |
| 27.5  | 1559.8307 | 0.0042  | <a href="#">AQLLQGLGFNLTER</a>  | Deamidated Q5 0.00%    |
| 11.8  | 1559.8307 | 0.0042  | <a href="#">AQLLQGLGFNLTER</a>  | Deamidated Q2 0.00%    |
| 6.9   | 1559.8420 | -0.0071 | <a href="#">SPQLVVQHLSPEAR</a>  |                        |
| 5.0   | 1559.8280 | 0.0069  | <a href="#">RRAAQAGPTQPGPPR</a> |                        |
| 4.4   | 1559.8341 | 0.0008  | <a href="#">RVELAVMLNLTER</a>   |                        |
| 3.3   | 1558.8315 | 1.0035  | <a href="#">ELKLSKVGQGENTER</a> |                        |
| 1.5   | 1559.8280 | 0.0069  | <a href="#">RRAAQAGPTQPGPPR</a> |                        |
| 0.4   | 1558.8256 | 1.0093  | <a href="#">WKGTIHIRYEEK</a>    |                        |

Mascot: <http://www.matrixscience.com/>

# MATRIX SCIENCE Mascot Search Results

## Peptide View

MS/MS Fragmentation of **QINSYVKNKTQ GK**

Found in **G3V350** in **con\_Xuniprot\_HUMAN3**, G3V350\_HUMAN Corticosteroid-binding globulin OS=Homo sapiens GN=SERPINA6 PE=3 SV=1

Match to Query 6886: 1507.802828 from(754.908690,2+) intensity(8091.4111) rtinseconds(193) scans(273) index(22453)

Title: 111019\_Est\_MI\_YS\_G\_03Spectrum197\_scans\_\_273

Data file C:\\mascot\\20140703\_Tmgf\_1D\\CSV\_UseAnalysis\\MasterCSV\\All\_Glyco\\mgf\\ptm\\UC18ERLIC\_PTM\_35D.mgf

Click mouse within plot area to zoom in by factor of two about that point

Or, to Da

Label all possible matches Label matches used for scoring

Show Y-axis

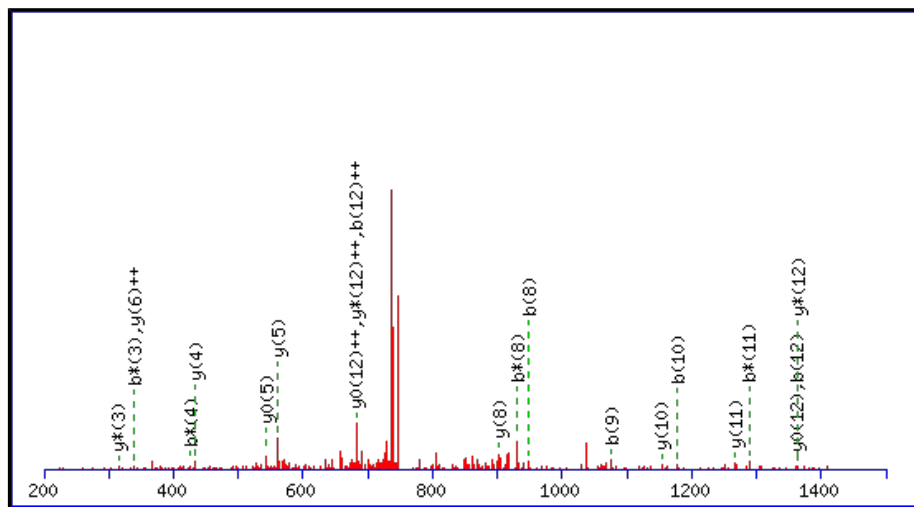

Monoisotopic mass of neutral peptide Mr(calc): 1507.7994

Fixed modifications: Carbamidomethyl (C) (apply to specified residues or termini only)

Variable modifications:

N8 : Deamidated (NQ)

Ions Score: 40 Expect: 0.018

Matches : 21/132 fragment ions using 24 most intense peaks ([help](#))

| #  | b         | b <sup>++</sup> | b <sup>*</sup> | b <sup>***</sup> | b <sup>0</sup> | b <sup>0++</sup> | Seq. | y         | y <sup>++</sup> | y <sup>*</sup> | y <sup>***</sup> | y <sup>0</sup> | y <sup>0++</sup> | #  |
|----|-----------|-----------------|----------------|------------------|----------------|------------------|------|-----------|-----------------|----------------|------------------|----------------|------------------|----|
| 1  | 129.0659  | 65.0366         | 112.0393       | 56.5233          |                |                  | Q    |           |                 |                |                  |                |                  | 13 |
| 2  | 242.1499  | 121.5786        | 225.1234       | 113.0653         |                |                  | I    | 1380.7482 | 690.8777        | 1363.7216      | 682.3644         | 1362.7376      | 681.8724         | 12 |
| 3  | 356.1928  | 178.6001        | 339.1663       | 170.0868         |                |                  | N    | 1267.6641 | 634.3357        | 1250.6375      | 625.8224         | 1249.6535      | 625.3304         | 11 |
| 4  | 443.2249  | 222.1161        | 426.1983       | 213.6028         | 425.2143       | 213.1108         | S    | 1153.6212 | 577.3142        | 1136.5946      | 568.8009         | 1135.6106      | 568.3089         | 10 |
| 5  | 606.2882  | 303.6477        | 589.2617       | 295.1345         | 588.2776       | 294.6425         | Y    | 1066.5891 | 533.7982        | 1049.5626      | 525.2849         | 1048.5786      | 524.7929         | 9  |
| 6  | 705.3566  | 353.1819        | 688.3301       | 344.6687         | 687.3461       | 344.1767         | V    | 903.5258  | 452.2665        | 886.4993       | 443.7533         | 885.5152       | 443.2613         | 8  |
| 7  | 833.4516  | 417.2294        | 816.4250       | 408.7162         | 815.4410       | 408.2241         | K    | 804.4574  | 402.7323        | 787.4308       | 394.2191         | 786.4468       | 393.7271         | 7  |
| 8  | 948.4785  | 474.7429        | 931.4520       | 466.2296         | 930.4680       | 465.7376         | N    | 676.3624  | 338.6849        | 659.3359       | 330.1716         | 658.3519       | 329.6796         | 6  |
| 9  | 1076.5735 | 538.7904        | 1059.5469      | 530.2771         | 1058.5629      | 529.7851         | K    | 561.3355  | 281.1714        | 544.3089       | 272.6581         | 543.3249       | 272.1661         | 5  |
| 10 | 1177.6212 | 589.3142        | 1160.5946      | 580.8009         | 1159.6106      | 580.3089         | T    | 433.2405  | 217.1239        | 416.2140       | 208.6106         | 415.2300       | 208.1186         | 4  |
| 11 | 1305.6797 | 653.3435        | 1288.6532      | 644.8302         | 1287.6692      | 644.3382         | Q    | 332.1928  | 166.6001        | 315.1663       | 158.0868         |                |                  | 3  |
| 12 | 1362.7012 | 681.8542        | 1345.6747      | 673.3410         | 1344.6906      | 672.8490         | G    | 204.1343  | 102.5708        | 187.1077       | 94.0575          |                |                  | 2  |
| 13 |           |                 |                |                  |                |                  | K    | 147.1128  | 74.0600         | 130.0863       | 65.5468          |                |                  | 1  |

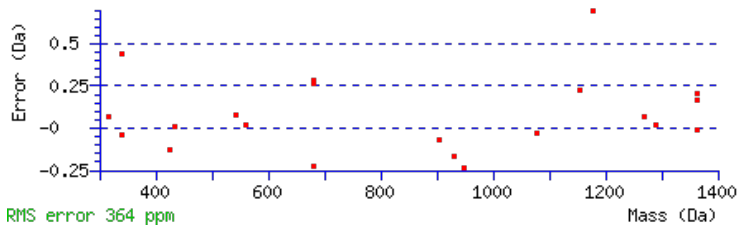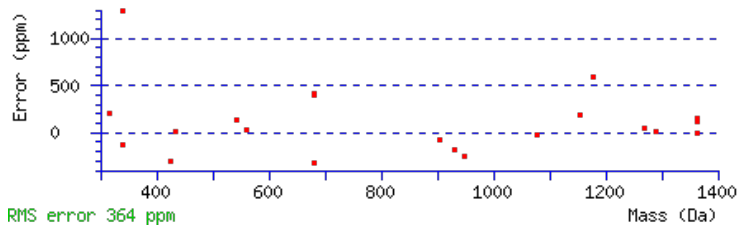

NCBI BLAST search of [QINSYVKNKTQGK](#)

(Parameters: blastp, nr protein database, expect=20000, no filter, PAM30)

Other BLAST [web gateways](#)

All matches to this query

| Score | Mr(calc)  | Delta   | Sequence                        | Site Analysis        |
|-------|-----------|---------|---------------------------------|----------------------|
| 39.9  | 1507.7994 | 0.0034  | <a href="#">QINSYVKNKTQGK</a>   | Deamidated N8 98.03% |
| 21.4  | 1507.7994 | 0.0034  | <a href="#">QINSYVKNKTQGK</a>   | Deamidated N3 1.38%  |
| 16.3  | 1507.7994 | 0.0034  | <a href="#">QINSYVKNKTQGK</a>   | Deamidated Q1 0.44%  |
| 11.8  | 1507.7994 | 0.0034  | <a href="#">QINSYVKNKTQGK</a>   | Deamidated Q11 0.15% |
| 8.3   | 1507.8068 | -0.0040 | <a href="#">DTYLNIMPKGTKK</a>   |                      |
| 7.7   | 1507.7967 | 0.0061  | <a href="#">GARAGGERPEGRAPK</a> |                      |
| 7.2   | 1507.8068 | -0.0040 | <a href="#">KINDDIKYQLMK</a>    |                      |
| 5.5   | 1507.8068 | -0.0040 | <a href="#">KLAKIAFMENTNK</a>   |                      |
| 5.5   | 1507.8068 | -0.0040 | <a href="#">KLAKIAFMENTNK</a>   |                      |
| 4.6   | 1507.8068 | -0.0040 | <a href="#">KLISGQVLRAEFM</a>   |                      |

Mascot: <http://www.matrixscience.com/>



# MASCOT SCIENCE Mascot Search Results

## Peptide View

MS/MS Fragmentation of **ADTHDEILEGLNFNLTPEAQIH**

Found in **G3V387** in **con\_Xuniprot\_HUMAN3**, G3V387\_HUMAN Short peptide from AAT (Fragment) OS=Homo sapiens GN=SERPINA1 PE=2 SV=1

Match to Query 25402: 2719.308462 from(907.443430,3+) intensity(34716.6563) rtinseconds(2320) scans(6088) index(18857)

Title: 111019\_Est\_MI\_YP\_G\_08Spectrum5314\_scans\_6088

Data file C:\mascot\20140703\_Tmgf\_1D\CSV\_UseAnalysis\MasterCSV\All\_Glyco\mgf\ptm\UC18ERLIC\_PTM\_35D.mgf

Click mouse within plot area to zoom in by factor of two about that point

Or, to Da

Label all possible matches Label matches used for scoring

Show Y-axis

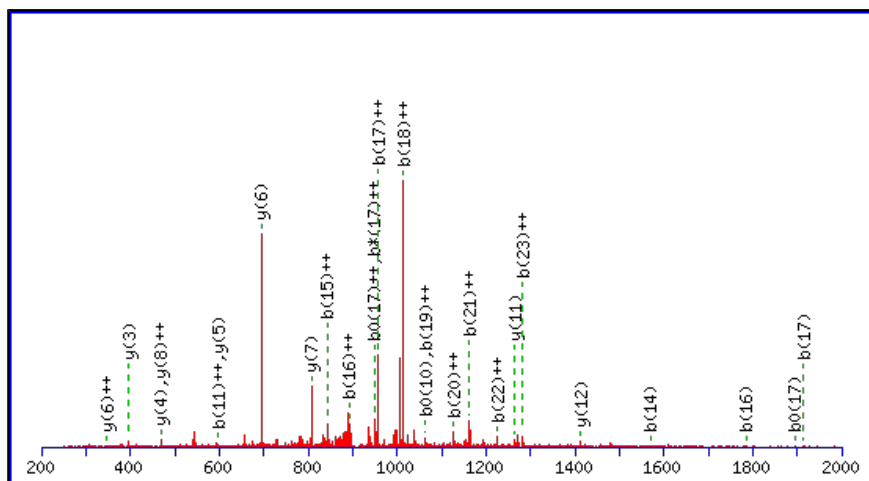

Monoisotopic mass of neutral peptide Mr(calc): 2719.2977

Fixed modifications: Carbamidomethyl (C) (apply to specified residues or termini only)

Variable modifications:

N14 : Deamidated (NQ)

Ions Score: 37 Expect: 0.049

Matches : 26/240 fragment ions using 52 most intense peaks ([help](#))

| #  | b         | b <sup>++</sup> | b <sup>*</sup> | b <sup>***</sup> | b <sup>0</sup> | b <sup>0++</sup> | Seq. | y         | y <sup>++</sup> | y <sup>*</sup> | y <sup>***</sup> | y <sup>0</sup> | y <sup>0++</sup> | #  |
|----|-----------|-----------------|----------------|------------------|----------------|------------------|------|-----------|-----------------|----------------|------------------|----------------|------------------|----|
| 1  | 72.0444   | 36.5258         |                |                  |                |                  | A    |           |                 |                |                  |                |                  | 24 |
| 2  | 187.0713  | 94.0393         |                |                  | 169.0608       | 85.0340          | D    | 2649.2679 | 1325.1376       | 2632.2413      | 1316.6243        | 2631.2573      | 1316.1323        | 23 |
| 3  | 288.1190  | 144.5631        |                |                  | 270.1084       | 135.5579         | T    | 2534.2409 | 1267.6241       | 2517.2144      | 1259.1108        | 2516.2304      | 1258.6188        | 22 |
| 4  | 425.1779  | 213.0926        |                |                  | 407.1674       | 204.0873         | H    | 2433.1932 | 1217.1003       | 2416.1667      | 1208.5870        | 2415.1827      | 1208.0950        | 21 |
| 5  | 540.2049  | 270.6061        |                |                  | 522.1943       | 261.6008         | D    | 2296.1343 | 1148.5708       | 2279.1078      | 1140.0575        | 2278.1238      | 1139.5655        | 20 |
| 6  | 669.2475  | 335.1274        |                |                  | 651.2369       | 326.1221         | E    | 2181.1074 | 1091.0573       | 2164.0808      | 1082.5441        | 2163.0968      | 1082.0521        | 19 |
| 7  | 782.3315  | 391.6694        |                |                  | 764.3210       | 382.6641         | I    | 2052.0648 | 1026.5360       | 2035.0382      | 1018.0228        | 2034.0542      | 1017.5308        | 18 |
| 8  | 895.4156  | 448.2114        |                |                  | 877.4050       | 439.2061         | L    | 1938.9807 | 969.9940        | 1921.9542      | 961.4807         | 1920.9702      | 960.9887         | 17 |
| 9  | 1024.4582 | 512.7327        |                |                  | 1006.4476      | 503.7274         | E    | 1825.8967 | 913.4520        | 1808.8701      | 904.9387         | 1807.8861      | 904.4467         | 16 |
| 10 | 1081.4796 | 541.2435        |                |                  | 1063.4691      | 532.2382         | G    | 1696.8541 | 848.9307        | 1679.8275      | 840.4174         | 1678.8435      | 839.9254         | 15 |
| 11 | 1194.5637 | 597.7855        |                |                  | 1176.5531      | 588.7802         | L    | 1639.8326 | 820.4199        | 1622.8061      | 811.9067         | 1621.8220      | 811.4147         | 14 |
| 12 | 1308.6066 | 654.8070        | 1291.5801      | 646.2937         | 1290.5961      | 645.8017         | N    | 1526.7486 | 763.8779        | 1509.7220      | 755.3646         | 1508.7380      | 754.8726         | 13 |
| 13 | 1455.6751 | 728.3412        | 1438.6485      | 719.8279         | 1437.6645      | 719.3359         | F    | 1412.7056 | 706.8564        | 1395.6791      | 698.3432         | 1394.6951      | 697.8512         | 12 |
| 14 | 1570.7020 | 785.8546        | 1553.6754      | 777.3414         | 1552.6914      | 776.8494         | N    | 1265.6372 | 633.3222        | 1248.6107      | 624.8090         | 1247.6266      | 624.3170         | 11 |
| 15 | 1683.7861 | 842.3967        | 1666.7595      | 833.8834         | 1665.7755      | 833.3914         | L    | 1150.6103 | 575.8088        | 1133.5837      | 567.2955         | 1132.5997      | 566.8035         | 10 |
| 16 | 1784.8337 | 892.9205        | 1767.8072      | 884.4072         | 1766.8232      | 883.9152         | T    | 1037.5262 | 519.2667        | 1020.4997      | 510.7535         | 1019.5156      | 510.2615         | 9  |
| 17 | 1913.8763 | 957.4418        | 1896.8498      | 948.9285         | 1895.8658      | 948.4365         | E    | 936.4785  | 468.7429        | 919.4520       | 460.2296         | 918.4680       | 459.7376         | 8  |
| 18 | 2026.9604 | 1013.9838       | 2009.9338      | 1005.4706        | 2008.9498      | 1004.9786        | I    | 807.4359  | 404.2216        | 790.4094       | 395.7083         | 789.4254       | 395.2163         | 7  |
| 19 | 2124.0132 | 1062.5102       | 2106.9866      | 1053.9969        | 2106.0026      | 1053.5049        | P    | 694.3519  | 347.6796        | 677.3253       | 339.1663         | 676.3413       | 338.6743         | 6  |
| 20 | 2253.0557 | 1127.0315       | 2236.0292      | 1118.5182        | 2235.0452      | 1118.0262        | E    | 597.2991  | 299.1532        | 580.2726       | 290.6399         | 579.2885       | 290.1479         | 5  |
| 21 | 2324.0929 | 1162.5501       | 2307.0663      | 1154.0368        | 2306.0823      | 1153.5448        | A    | 468.2565  | 234.6319        | 451.2300       | 226.1186         |                |                  | 4  |
| 22 | 2452.1514 | 1226.5794       | 2435.1249      | 1218.0661        | 2434.1409      | 1217.5741        | Q    | 397.2194  | 199.1133        | 380.1928       | 190.6001         |                |                  | 3  |

|    |           |                  |           |           |           |           |   |          |          |  |  |  |  |  |  |  |  |  |   |
|----|-----------|------------------|-----------|-----------|-----------|-----------|---|----------|----------|--|--|--|--|--|--|--|--|--|---|
| 23 | 2565.2355 | <b>1283.1214</b> | 2548.2090 | 1274.6081 | 2547.2249 | 1274.1161 | I | 269.1608 | 135.0840 |  |  |  |  |  |  |  |  |  | 2 |
| 24 |           |                  |           |           |           |           | H | 156.0768 | 78.5420  |  |  |  |  |  |  |  |  |  | 1 |

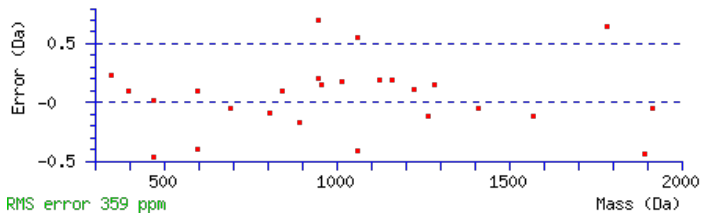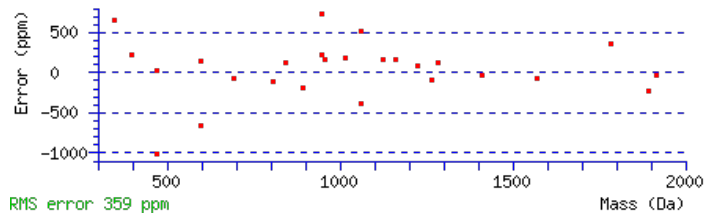

NCBI BLAST search of [ADTHDEILEGLNFNLTEIPEAQIH](#)

(Parameters: blastp, nr protein database, expect=20000, no filter, PAM30)

Other BLAST [web gateways](#)

**All matches to this query**

| Score | Mr(calc)  | Delta   | Sequence                                  | Site Analysis         |
|-------|-----------|---------|-------------------------------------------|-----------------------|
| 37.4  | 2719.2977 | 0.0108  | <a href="#">ADTHDEILEGLNFNLTEIPEAQIH</a>  | Deamidated N14 58.74% |
| 35.5  | 2719.2977 | 0.0108  | <a href="#">ADTHDEILEGLNFNLTEIPEAQIH</a>  | Deamidated N12 38.45% |
| 28.4  | 2718.3137 | 0.9948  | <a href="#">ADTHDEILEGLNFNLTEIPEAQIH</a>  |                       |
| 24.2  | 2719.2977 | 0.0108  | <a href="#">ADTHDEILEGLNFNLTEIPEAQIH</a>  | Deamidated Q22 2.81%  |
| 2.8   | 2717.2888 | 2.0197  | <a href="#">QHNLNAQEQTLLDSVQSLQMGLVM</a>  |                       |
| 2.4   | 2718.2959 | 1.0125  | <a href="#">GVDLSGNDKGGYFPENVKAMTSLR</a>  |                       |
| 1.7   | 2719.3104 | -0.0019 | <a href="#">WEILESEFNINYNNELPMYRK</a>     |                       |
| 1.5   | 2717.3105 | 1.9979  | <a href="#">VNKLMYLVESPLHSNALDGETLDAS</a> |                       |
| 1.3   | 2718.3137 | 0.9948  | <a href="#">NPQKNTPKFLYTVPNGNNPTGNSLT</a> |                       |
| 1.3   | 2719.2977 | 0.0108  | <a href="#">NPQKNTPKFLYTVPNGNNPTGNSLT</a> |                       |

Mascot: <http://www.matrixscience.com/>

# MASCOT SCIENCE Mascot Search Results

## Peptide View

MS/MS Fragmentation of **TLNQSSDELQLSMGNAMFVK**

Found in **G3V5I3** in **con\_Xuniprot\_HUMAN3**, G3V5I3\_HUMAN Alpha-1-antichymotrypsin OS=Homo sapiens GN=SERPINA3 PE=3 SV=1

Match to Query 14883: 2213.042368 from(1107.528460,2+) intensity(65689.0234) rtinseconds(2020) scans(4905) index(11918)

Title: 111019\_Est\_ISCardio\_NMI\_YS\_G\_8Spectrum4230\_scans\_\_4905

Data file C:\mascot\20140703\_Tmgf\_1D\CSV\_UseAnalysis\MasterCSV\All\_Glyco\mgf\ptm\UC18ERLIC\_PTM\_35D.mgf

Click mouse within plot area to zoom in by factor of two about that point

Or, to Da

Label all possible matches Label matches used for scoring

Show Y-axis

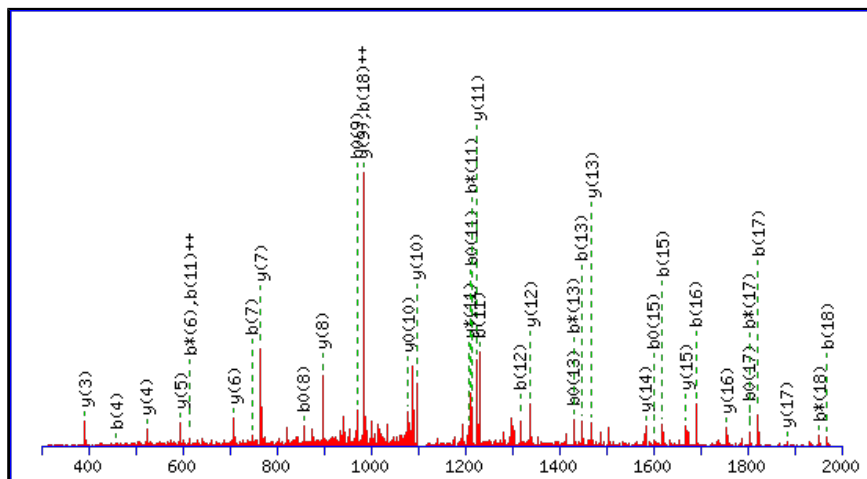

Monoisotopic mass of neutral peptide Mr(calc): 2213.0344

Fixed modifications: Carbamidomethyl (C) (apply to specified residues or termini only)

Variable modifications:

N3 : Deamidated (NQ)

Ions Score: 107 Expect: 4.7e-009

Matches : 39/208 fragment ions using 68 most intense peaks ([help](#))

| #  | b                | b <sup>++</sup> | b <sup>*</sup>   | b <sup>*++</sup> | b <sup>0</sup>   | b <sup>0++</sup> | Seq. | y                | y <sup>++</sup> | y <sup>*</sup>   | y <sup>*++</sup> | y <sup>0</sup>   | y <sup>0++</sup> | #  |
|----|------------------|-----------------|------------------|------------------|------------------|------------------|------|------------------|-----------------|------------------|------------------|------------------|------------------|----|
| 1  | 102.0550         | 51.5311         |                  |                  | 84.0444          | 42.5258          | T    |                  |                 |                  |                  |                  |                  | 20 |
| 2  | 215.1390         | 108.0731        |                  |                  | 197.1285         | 99.0679          | L    | 2112.9940        | 1057.0006       | 2095.9675        | 1048.4874        | 2094.9835        | 1047.9954        | 19 |
| 3  | 330.1660         | 165.5866        | 313.1394         | 157.0733         | 312.1554         | 156.5813         | N    | 1999.9100        | 1000.4586       | 1982.8834        | 991.9453         | 1981.8994        | 991.4533         | 18 |
| 4  | <b>458.2245</b>  | 229.6159        | 441.1980         | 221.1026         | 440.2140         | 220.6106         | Q    | <b>1884.8830</b> | 942.9451        | 1867.8565        | 934.4319         | 1866.8724        | 933.9399         | 17 |
| 5  | 545.2566         | 273.1319        | 528.2300         | 264.6186         | 527.2460         | 264.1266         | S    | <b>1756.8244</b> | 878.9159        | 1739.7979        | 870.4026         | 1738.8139        | 869.9106         | 16 |
| 6  | 632.2886         | 316.6479        | <b>615.2620</b>  | 308.1347         | 614.2780         | 307.6427         | S    | <b>1669.7924</b> | 835.3998        | 1652.7659        | 826.8866         | 1651.7818        | 826.3946         | 15 |
| 7  | <b>747.3155</b>  | 374.1614        | 730.2890         | 365.6481         | 729.3050         | 365.1561         | D    | <b>1582.7604</b> | 791.8838        | 1565.7338        | 783.3706         | 1564.7498        | 782.8785         | 14 |
| 8  | 876.3581         | 438.6827        | 859.3316         | 430.1694         | <b>858.3476</b>  | 429.6774         | E    | <b>1467.7334</b> | 734.3704        | 1450.7069        | 725.8571         | 1449.7229        | 725.3651         | 13 |
| 9  | 989.4422         | 495.2247        | 972.4156         | 486.7115         | <b>971.4316</b>  | 486.2195         | L    | <b>1338.6908</b> | 669.8491        | 1321.6643        | 661.3358         | 1320.6803        | 660.8438         | 12 |
| 10 | 1117.5008        | 559.2540        | 1100.4742        | 550.7408         | 1099.4902        | 550.2487         | Q    | <b>1225.6068</b> | 613.3070        | <b>1208.5802</b> | 604.7938         | 1207.5962        | 604.3017         | 11 |
| 11 | <b>1230.5848</b> | <b>615.7961</b> | <b>1213.5583</b> | 607.2828         | <b>1212.5743</b> | 606.7908         | L    | <b>1097.5482</b> | 549.2777        | 1080.5217        | 540.7645         | <b>1079.5376</b> | 540.2725         | 10 |
| 12 | <b>1317.6169</b> | 659.3121        | 1300.5903        | 650.7988         | 1299.6063        | 650.3068         | S    | <b>984.4641</b>  | 492.7357        | 967.4376         | 484.2224         | 966.4536         | 483.7304         | 9  |
| 13 | <b>1448.6574</b> | 724.8323        | <b>1431.6308</b> | 716.3190         | <b>1430.6468</b> | 715.8270         | M    | <b>897.4321</b>  | 449.2197        | 880.4056         | 440.7064         |                  |                  | 8  |
| 14 | 1505.6788        | 753.3430        | 1488.6523        | 744.8298         | 1487.6682        | 744.3378         | G    | <b>766.3916</b>  | 383.6994        | 749.3651         | 375.1862         |                  |                  | 7  |
| 15 | <b>1619.7217</b> | 810.3645        | 1602.6952        | 801.8512         | <b>1601.7112</b> | 801.3592         | N    | <b>709.3702</b>  | 355.1887        | 692.3436         | 346.6754         |                  |                  | 6  |
| 16 | <b>1690.7589</b> | 845.8831        | 1673.7323        | 837.3698         | 1672.7483        | 836.8778         | A    | <b>595.3272</b>  | 298.1673        | 578.3007         | 289.6540         |                  |                  | 5  |
| 17 | <b>1821.7993</b> | 911.4033        | <b>1804.7728</b> | 902.8900         | <b>1803.7888</b> | 902.3980         | M    | <b>524.2901</b>  | 262.6487        | 507.2636         | 254.1354         |                  |                  | 4  |
| 18 | <b>1968.8678</b> | <b>984.9375</b> | <b>1951.8412</b> | 976.4242         | 1950.8572        | 975.9322         | F    | <b>393.2496</b>  | 197.1285        | 376.2231         | 188.6152         |                  |                  | 3  |
| 19 | 2067.9362        | 1034.4717       | 2050.9096        | 1025.9584        | 2049.9256        | 1025.4664        | V    | 246.1812         | 123.5942        | 229.1547         | 115.0810         |                  |                  | 2  |
| 20 |                  |                 |                  |                  |                  |                  | K    | 147.1128         | 74.0600         | 130.0863         | 65.5468          |                  |                  | 1  |

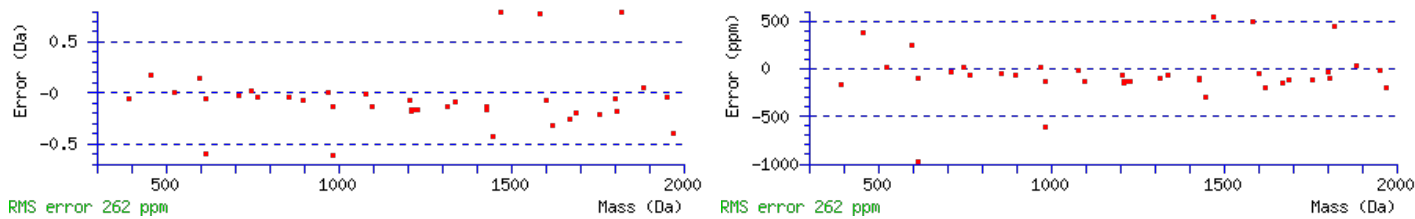

NCBI BLAST search of [TLNQSSDELQLSMGNAMFVK](#)  
 (Parameters: blastp, nr protein database, expect=20000, no filter, PAM30)  
 Other BLAST [web gateways](#)

**All matches to this query**

| Score | Mr(calc)  | Delta  | Sequence                               | Site Analysis        |
|-------|-----------|--------|----------------------------------------|----------------------|
| 106.6 | 2213.0344 | 0.0080 | <a href="#">TLNQSSDELQLSMGNAMFVK</a>   | Deamidated N3 93.32% |
| 94.8  | 2213.0344 | 0.0080 | <a href="#">TLNQSSDELQLSMGNAMFVK</a>   | Deamidated Q4 6.14%  |
| 84.2  | 2213.0344 | 0.0080 | <a href="#">TLNQSSDELQLSMGNAMFVK</a>   | Deamidated Q10 0.54% |
| 63.1  | 2213.0344 | 0.0080 | <a href="#">TLNQSSDELQLSMGNAMFVK</a>   | Deamidated N15 0.00% |
| 5.0   | 2211.0305 | 2.0119 | <a href="#">QFTTNSNNPGTNTGAFVGRAR</a>  |                      |
| 4.6   | 2211.0305 | 2.0119 | <a href="#">QFTTNSNNPGTNTGAFVGRAR</a>  |                      |
| 3.4   | 2212.0477 | 0.9947 | <a href="#">MNVGV AHSEVNP NTRVMNSR</a> |                      |
| 3.4   | 2212.0477 | 0.9947 | <a href="#">MNVGV AHSEVNP NTRVMNSR</a> |                      |
| 3.0   | 2211.0305 | 2.0119 | <a href="#">QFTTNSNNPGTNTGAFVGRAR</a>  |                      |
| 2.2   | 2212.0477 | 0.9947 | <a href="#">MNVGV AHSEVNP NTRVMNSR</a> |                      |

Mascot: <http://www.matrixscience.com/>

# MASCOT SCIENCE Mascot Search Results

## Peptide View

MS/MS Fragmentation of **TLNQSSDELQLSMGNAMFVK**

Found in **G3V5I3** in **con\_Xuniprot\_HUMAN3**, G3V5I3\_HUMAN Alpha-1-antichymotrypsin OS=Homo sapiens GN=SERPINA3 PE=3 SV=1

Match to Query 14935: 2229.037368 from(1115.525960,2+) intensity(185032.9844) rtinseconds(1685) scans(3972) index(11818)

Title: 111019\_Est\_ISCardio\_NMI\_YS\_G\_8Spectrum3393\_scans\_\_3972

Data file C:\mascot\20140703\_Tmgf\_1D\CSV\_UseAnalysis\MasterCSV\All\_Glyco\mgf\ptm\UC18ERLIC\_PTM\_35D.mgf

Click mouse within plot area to zoom in by factor of two about that point

Or,  to  Da

Label all possible matches  Label matches used for scoring

Show Y-axis

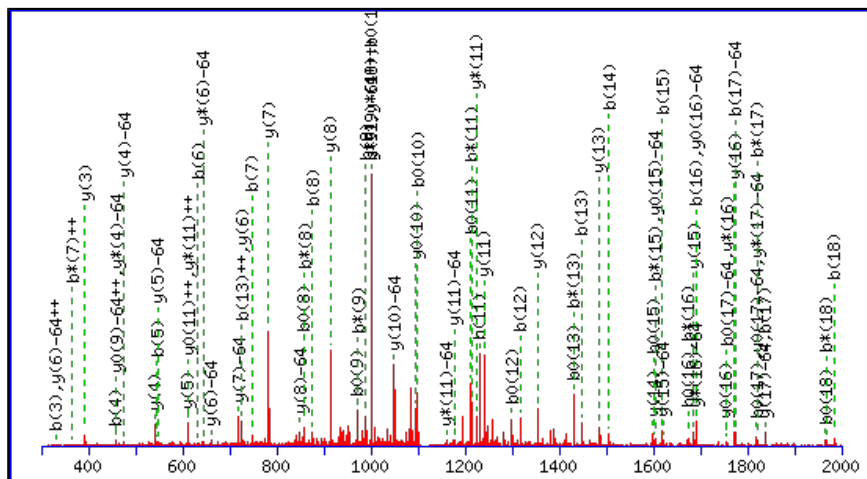

Monoisotopic mass of neutral peptide Mr(calc): 2229.0293

Fixed modifications: Carbamidomethyl (C) (apply to specified residues or termini only)

Variable modifications:

N3 : Deamidated (NQ)

M17 : Oxidation (M), with neutral losses 0.0000(shown in table), 63.9983

Ions Score: 87 Expect: 3.7e-007

Matches : 78/312 fragment ions using 119 most intense peaks ([help](#))

| #  | b                | b <sup>++</sup> | b <sup>*</sup>   | b <sup>*++</sup> | b <sup>0</sup>   | b <sup>0++</sup> | Seq. | y                | y <sup>++</sup> | y <sup>*</sup>   | y <sup>*++</sup> | y <sup>0</sup>   | y <sup>0++</sup> | #  |
|----|------------------|-----------------|------------------|------------------|------------------|------------------|------|------------------|-----------------|------------------|------------------|------------------|------------------|----|
| 1  | 102.0550         | 51.5311         |                  |                  | 84.0444          | 42.5258          | T    |                  |                 |                  |                  |                  |                  | 20 |
| 2  | 215.1390         | 108.0731        |                  |                  | 197.1285         | 99.0679          | L    | 2128.9889        | 1064.9981       | 2111.9624        | 1056.4848        | 2110.9784        | 1055.9928        | 19 |
| 3  | <b>330.1660</b>  | 165.5866        | 313.1394         | 157.0733         | 312.1554         | 156.5813         | N    | 2015.9049        | 1008.4561       | 1998.8783        | <b>999.9428</b>  | 1997.8943        | 999.4508         | 18 |
| 4  | <b>458.2245</b>  | 229.6159        | 441.1980         | 221.1026         | 440.2140         | 220.6106         | Q    | 1900.8779        | 950.9426        | 1883.8514        | 942.4293         | 1882.8674        | 941.9373         | 17 |
| 5  | <b>545.2566</b>  | 273.1319        | 528.2300         | 264.6186         | 527.2460         | 264.1266         | S    | <b>1772.8193</b> | 886.9133        | <b>1755.7928</b> | 878.4000         | <b>1754.8088</b> | 877.9080         | 16 |
| 6  | <b>632.2886</b>  | 316.6479        | 615.2620         | 308.1347         | 614.2780         | 307.6427         | S    | <b>1685.7873</b> | 843.3973        | 1668.7608        | 834.8840         | 1667.7768        | 834.3920         | 15 |
| 7  | <b>747.3155</b>  | 374.1614        | 730.2890         | <b>365.6481</b>  | 729.3050         | 365.1561         | D    | <b>1598.7553</b> | 799.8813        | 1581.7287        | 791.3680         | 1580.7447        | 790.8760         | 14 |
| 8  | <b>876.3581</b>  | 438.6827        | <b>859.3316</b>  | 430.1694         | <b>858.3476</b>  | 429.6774         | E    | <b>1483.7283</b> | 742.3678        | 1466.7018        | 733.8545         | 1465.7178        | 733.3625         | 13 |
| 9  | <b>989.4422</b>  | 495.2247        | <b>972.4156</b>  | 486.7115         | <b>971.4316</b>  | 486.2195         | L    | <b>1354.6858</b> | 677.8465        | 1337.6592        | 669.3332         | 1336.6752        | 668.8412         | 12 |
| 10 | 1117.5008        | 559.2540        | 1100.4742        | 550.7408         | <b>1099.4902</b> | 550.2487         | Q    | <b>1241.6017</b> | 621.3045        | <b>1224.5751</b> | <b>612.7912</b>  | 1223.5911        | <b>612.2992</b>  | 11 |
| 11 | <b>1230.5848</b> | 615.7961        | <b>1213.5583</b> | 607.2828         | <b>1212.5743</b> | 606.7908         | L    | 1113.5431        | 557.2752        | 1096.5166        | 548.7619         | <b>1095.5325</b> | 548.2699         | 10 |
| 12 | <b>1317.6169</b> | 659.3121        | 1300.5903        | 650.7988         | <b>1299.6063</b> | 650.3068         | S    | <b>1000.4590</b> | 500.7332        | 983.4325         | 492.2199         | 982.4485         | 491.7279         | 9  |
| 13 | <b>1448.6574</b> | <b>724.8323</b> | <b>1431.6308</b> | 716.3190         | <b>1430.6468</b> | 715.8270         | M    | <b>913.4270</b>  | 457.2171        | 896.4005         | 448.7039         |                  |                  | 8  |
| 14 | <b>1505.6788</b> | 753.3430        | 1488.6523        | 744.8298         | 1487.6682        | 744.3378         | G    | <b>782.3865</b>  | 391.6969        | 765.3600         | 383.1836         |                  |                  | 7  |
| 15 | <b>1619.7217</b> | 810.3645        | <b>1602.6952</b> | 801.8512         | <b>1601.7112</b> | 801.3592         | N    | <b>725.3651</b>  | 363.1862        | 708.3385         | 354.6729         |                  |                  | 6  |
| 16 | <b>1690.7589</b> | 845.8831        | <b>1673.7323</b> | 837.3698         | <b>1672.7483</b> | 836.8778         | A    | <b>611.3221</b>  | 306.1647        | 594.2956         | 297.6514         |                  |                  | 5  |
| 17 | <b>1837.7943</b> | 919.4008        | <b>1820.7677</b> | 910.8875         | <b>1819.7837</b> | 910.3955         | M    | <b>540.2850</b>  | 270.6462        | 523.2585         | 262.1329         |                  |                  | 4  |
| 18 | <b>1984.8627</b> | 992.9350        | <b>1967.8361</b> | 984.4217         | <b>1966.8521</b> | 983.9297         | F    | <b>393.2496</b>  | 197.1285        | 376.2231         | 188.6152         |                  |                  | 3  |
| 19 | 2083.9311        | 1042.4692       | 2066.9045        | 1033.9559        | 2065.9205        | 1033.4639        | V    | 246.1812         | 123.5942        | 229.1547         | 115.0810         |                  |                  | 2  |
| 20 |                  |                 |                  |                  |                  |                  | K    | 147.1128         | 74.0600         | 130.0863         | 65.5468          |                  |                  | 1  |

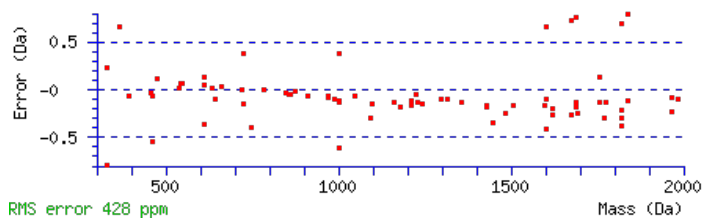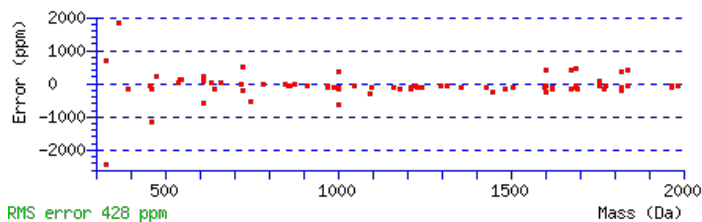

NCBI BLAST search of [TLNQSSDELQLSMGNAMFVK](#)  
 (Parameters: blastp, nr protein database, expect=20000, no filter, PAM30)  
 Other BLAST [web gateways](#)

All matches to this query

| Score | Mr(calc)  | Delta  | Sequence                             | Site Analysis                        |
|-------|-----------|--------|--------------------------------------|--------------------------------------|
| 87.4  | 2229.0293 | 0.0081 | <a href="#">TLNQSSDELQLSMGNAMFVK</a> | Deamidated N3, Oxidation M17; 82.65% |
| 80.0  | 2229.0293 | 0.0081 | <a href="#">TLNQSSDELQLSMGNAMFVK</a> | Deamidated Q4, Oxidation M17; 15.28% |
| 71.3  | 2229.0293 | 0.0081 | <a href="#">TLNQSSDELQLSMGNAMFVK</a> | Deamidated Q10, Oxidation M17; 2.06% |
| 48.3  | 2228.0453 | 0.9921 | <a href="#">TLNQSSDELQLSMGNAMFVK</a> |                                      |
| 48.2  | 2229.0293 | 0.0081 | <a href="#">TLNQSSDELQLSMGNAMFVK</a> | Deamidated N15, Oxidation M17; 0.01% |
| 38.0  | 2229.0293 | 0.0081 | <a href="#">TLNQSSDELQLSMGNAMFVK</a> | Deamidated N3, Oxidation M13; 0.00%  |
| 33.4  | 2229.0293 | 0.0081 | <a href="#">TLNQSSDELQLSMGNAMFVK</a> | Deamidated Q4, Oxidation M13; 0.00%  |
| 29.0  | 2229.0293 | 0.0081 | <a href="#">TLNQSSDELQLSMGNAMFVK</a> | Deamidated Q10, Oxidation M13; 0.00% |
| 17.6  | 2228.0453 | 0.9921 | <a href="#">TLNQSSDELQLSMGNAMFVK</a> |                                      |
| 12.3  | 2229.0293 | 0.0081 | <a href="#">TLNQSSDELQLSMGNAMFVK</a> | Deamidated N15, Oxidation M13; 0.00% |

Mascot: <http://www.matrixscience.com/>

# MATRIX SCIENCE Mascot Search Results

## Peptide View

MS/MS Fragmentation of **YTGNASALFILPDQDK**

Found in **G3V3A0** in **con\_Xuniprot\_HUMAN3**, G3V3A0\_HUMAN Alpha-1-antichymotrypsin OS=Homo sapiens GN=SERPINA3 PE=3 SV=1

Match to Query 9372: 1752.863648 from(877.439100,2+) intensity(21117.1152) rtinseconds(1865) scans(4455) index(27882)

Title: 111019\_Est\_MI\_YS\_G\_11Spectrum3886\_scans\_4455

Data file C:\\mascot\\20140703\_Tmgf\_1D\\CSV\_UseAnalysis\\MasterCSV\\All\_Glyco\\mgf\\ptm\\UC18ERLIC\_PTM\_35D.mgf

Click mouse within plot area to zoom in by factor of two about that point

Or, to Da

Label all possible matches Label matches used for scoring

Show Y-axis

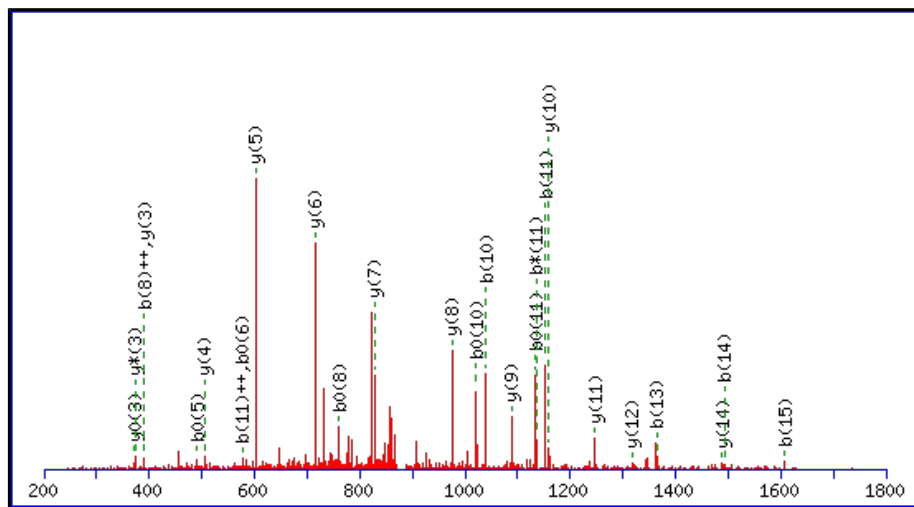

Monoisotopic mass of neutral peptide Mr(calc): 1752.8570

Fixed modifications: Carbamidomethyl (C) (apply to specified residues or termini only)

Variable modifications:

N4 : Deamidated (NQ)

Ions Score: 84 Expect: 9.6e-007

Matches : 26/170 fragment ions using 43 most intense peaks ([help](#))

| #  | b                | b <sup>++</sup> | b <sup>*</sup>   | b <sup>***</sup> | b <sup>0</sup>   | b <sup>0++</sup> | Seq. | y                | y <sup>++</sup> | y <sup>*</sup>  | y <sup>***</sup> | y <sup>0</sup>  | y <sup>0++</sup> | #  |
|----|------------------|-----------------|------------------|------------------|------------------|------------------|------|------------------|-----------------|-----------------|------------------|-----------------|------------------|----|
| 1  | 164.0706         | 82.5389         |                  |                  |                  |                  | Y    |                  |                 |                 |                  |                 |                  | 16 |
| 2  | 265.1183         | 133.0628        |                  |                  | 247.1077         | 124.0575         | T    | 1590.8010        | 795.9041        | 1573.7744       | 787.3909         | 1572.7904       | 786.8988         | 15 |
| 3  | 322.1397         | 161.5735        |                  |                  | 304.1292         | 152.5682         | G    | <b>1489.7533</b> | 745.3803        | 1472.7268       | 736.8670         | 1471.7427       | 736.3750         | 14 |
| 4  | 437.1667         | 219.0870        | 420.1401         | 210.5737         | 419.1561         | 210.0817         | N    | 1432.7318        | 716.8696        | 1415.7053       | 708.3563         | 1414.7213       | 707.8643         | 13 |
| 5  | 508.2038         | 254.6055        | 491.1773         | 246.0923         | <b>490.1932</b>  | 245.6003         | A    | <b>1317.7049</b> | 659.3561        | 1300.6783       | 650.8428         | 1299.6943       | 650.3508         | 12 |
| 6  | 595.2358         | 298.1216        | 578.2093         | 289.6083         | <b>577.2253</b>  | 289.1163         | S    | <b>1246.6678</b> | 623.8375        | 1229.6412       | 615.3243         | 1228.6572       | 614.8322         | 11 |
| 7  | 666.2729         | 333.6401        | 649.2464         | 325.1268         | 648.2624         | 324.6348         | A    | <b>1159.6358</b> | 580.3215        | 1142.6092       | 571.8082         | 1141.6252       | 571.3162         | 10 |
| 8  | 779.3570         | <b>390.1821</b> | 762.3305         | 381.6689         | <b>761.3464</b>  | 381.1769         | L    | <b>1088.5986</b> | 544.8030        | 1071.5721       | 536.2897         | 1070.5881       | 535.7977         | 9  |
| 9  | 926.4254         | 463.7164        | 909.3989         | 455.2031         | 908.4149         | 454.7111         | F    | <b>975.5146</b>  | 488.2609        | 958.4880        | 479.7477         | 957.5040        | 479.2556         | 8  |
| 10 | <b>1039.5095</b> | 520.2584        | 1022.4829        | 511.7451         | <b>1021.4989</b> | 511.2531         | I    | <b>828.4462</b>  | 414.7267        | 811.4196        | 406.2134         | 810.4356        | 405.7214         | 7  |
| 11 | <b>1152.5936</b> | <b>576.8004</b> | <b>1135.5670</b> | 568.2871         | <b>1134.5830</b> | 567.7951         | L    | <b>715.3621</b>  | 358.1847        | 698.3355        | 349.6714         | 697.3515        | 349.1794         | 6  |
| 12 | 1249.6463        | 625.3268        | 1232.6198        | 616.8135         | 1231.6358        | 616.3215         | P    | <b>602.2780</b>  | 301.6427        | 585.2515        | 293.1294         | 584.2675        | 292.6374         | 5  |
| 13 | <b>1364.6733</b> | 682.8403        | 1347.6467        | 674.3270         | 1346.6627        | 673.8350         | D    | <b>505.2253</b>  | 253.1163        | 488.1987        | 244.6030         | 487.2147        | 244.1110         | 4  |
| 14 | <b>1492.7318</b> | 746.8696        | 1475.7053        | 738.3563         | 1474.7213        | 737.8643         | Q    | <b>390.1983</b>  | 195.6028        | <b>373.1718</b> | 187.0895         | <b>372.1878</b> | 186.5975         | 3  |
| 15 | <b>1607.7588</b> | 804.3830        | 1590.7322        | 795.8698         | 1589.7482        | 795.3777         | D    | 262.1397         | 131.5735        | 245.1132        | 123.0602         | 244.1292        | 122.5682         | 2  |
| 16 |                  |                 |                  |                  |                  |                  | K    | 147.1128         | 74.0600         | 130.0863        | 65.5468          |                 |                  | 1  |



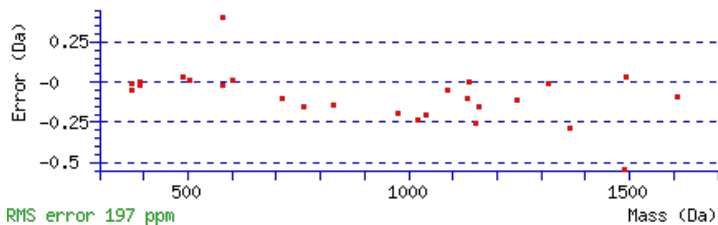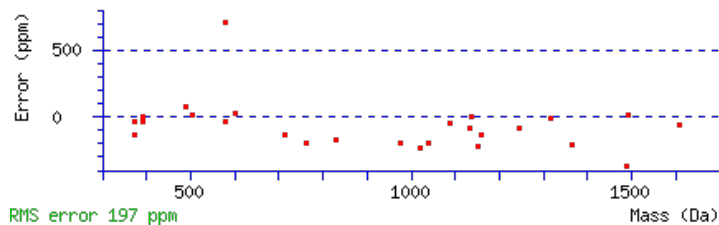

NCBI **BLAST** search of [YTGNASALFILPDQDK](#)

(Parameters: blastp, nr protein database, expect=20000, no filter, PAM30)

Other BLAST [web gateways](#)

**All matches to this query**

| Score | Mr(calc)  | Delta   | Sequence                         | Site Analysis         |
|-------|-----------|---------|----------------------------------|-----------------------|
| 84.0  | 1752.8570 | 0.0066  | <a href="#">YTGNASALFILPDQDK</a> | Deamidated N4 100.00% |
| 26.9  | 1752.8570 | 0.0066  | <a href="#">YTGNASALFILPDQDK</a> | Deamidated Q14 0.00%  |
| 18.2  | 1751.8690 | 0.9947  | <a href="#">EFQTSAISRDIDTAAK</a> |                       |
| 16.4  | 1752.8577 | 0.0060  | <a href="#">ERVHPKLNQMDQDK</a>   |                       |
| 14.1  | 1752.8570 | 0.0066  | <a href="#">DPYILEEASFVVQSR</a>  |                       |
| 9.3   | 1752.8682 | -0.0046 | <a href="#">NVQFGLAYQEGRLQK</a>  |                       |
| 9.3   | 1752.8682 | -0.0046 | <a href="#">NVQFGLAYQEGRLQK</a>  |                       |
| 9.1   | 1750.8625 | 2.0012  | <a href="#">QLSTGEELYIIDENK</a>  |                       |
| 8.5   | 1752.8682 | -0.0046 | <a href="#">FNQLNRSLODIEFK</a>   |                       |
| 7.1   | 1751.8619 | 1.0017  | <a href="#">QRADMLEMELKMLK</a>   |                       |

Mascot: <http://www.matrixscience.com/>

# MATRIX SCIENCE Mascot Search Results

## Peptide View

MS/MS Fragmentation of **TLNQSSDELQLSMGNAMFVK**

Found in **G3V5I3** in **con\_Xuniprot\_HUMAN3**, G3V5I3\_HUMAN Alpha-1-antichymotrypsin OS=Homo sapiens GN=SERPINA3 PE=3 SV=1

Match to Query 15005: 2245.028652 from(749.350160,3+) intensity(948436.5000) rtinseconds(1342) scans(3214) index(10884)

Title: 111019\_Est\_ISCardio\_NMI\_YS\_G\_7Spectrum2695\_scans\_\_3214

Data file C:\mascot\20140703\_Tmgf\_1D\CSV\_UseAnalysis\MasterCSV\All\_Glyco\mgf\ptm\UC18ERLIC\_PTM\_35D.mgf

Click mouse within plot area to zoom in by factor of two about that point

Or, to Da

Label all possible matches Label matches used for scoring

Show Y-axis

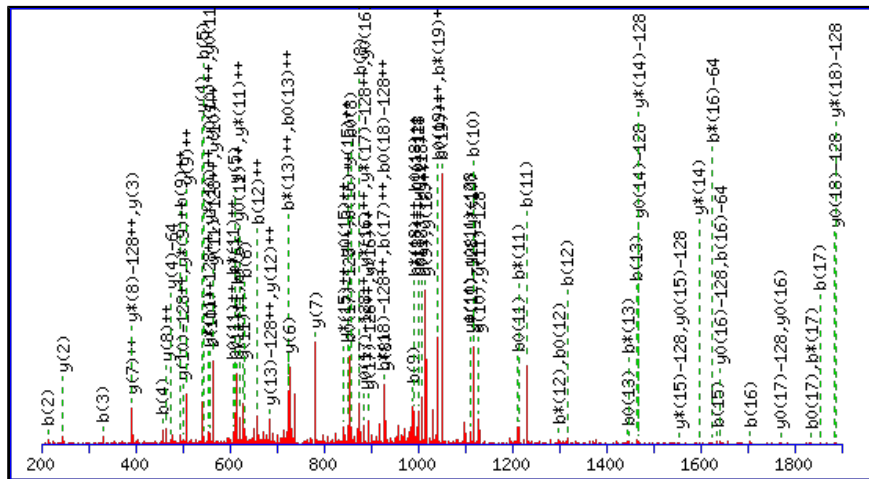

Monoisotopic mass of neutral peptide Mr(calc): 2245.0242

Fixed modifications: Carbamidomethyl (C) (apply to specified residues or termini only)

Variable modifications:

N3 : Deamidated (NQ)

M13 : Oxidation (M), with neutral losses 0.0000(shown in table), 63.9983

M17 : Oxidation (M), with neutral losses 0.0000(shown in table), 63.9983

Ions Score: 74 Expect: 7.1e-006

Matches : 100/336 fragment ions using 119 most intense peaks ([help](#))

| #  | b                | b <sup>++</sup>  | b <sup>*</sup>   | b <sup>*++</sup> | b <sup>0</sup>   | b <sup>0++</sup> | Seq. | y                | y <sup>++</sup>  | y <sup>*</sup>   | y <sup>*++</sup> | y <sup>0</sup>   | y <sup>0++</sup> | #  |
|----|------------------|------------------|------------------|------------------|------------------|------------------|------|------------------|------------------|------------------|------------------|------------------|------------------|----|
| 1  | 102.0550         | 51.5311          |                  |                  | 84.0444          | 42.5258          | T    |                  |                  |                  |                  |                  |                  | 20 |
| 2  | <b>215.1390</b>  | 108.0731         |                  |                  | 197.1285         | 99.0679          | L    | 2144.9838        | 1072.9956        | 2127.9573        | 1064.4823        | 2126.9733        | 1063.9903        | 19 |
| 3  | <b>330.1660</b>  | 165.5866         | 313.1394         | 157.0733         | 312.1554         | 156.5813         | N    | 2031.8998        | <b>1016.4535</b> | 2014.8732        | <b>1007.9403</b> | 2013.8892        | <b>1007.4482</b> | 18 |
| 4  | <b>458.2245</b>  | 229.6159         | 441.1980         | 221.1026         | 440.2140         | 220.6106         | Q    | 1916.8728        | 958.9401         | 1899.8463        | 950.4268         | 1898.8623        | 949.9348         | 17 |
| 5  | <b>545.2566</b>  | 273.1319         | 528.2300         | 264.6186         | 527.2460         | 264.1266         | S    | 1788.8143        | <b>894.9108</b>  | 1771.7877        | <b>886.3975</b>  | <b>1770.8037</b> | <b>885.9055</b>  | 16 |
| 6  | <b>632.2886</b>  | 316.6479         | <b>615.2620</b>  | 308.1347         | 614.2780         | 307.6427         | S    | 1701.7822        | <b>851.3948</b>  | 1684.7557        | <b>842.8815</b>  | 1683.7717        | <b>842.3895</b>  | 15 |
| 7  | 747.3155         | 374.1614         | 730.2890         | 365.6481         | 729.3050         | 365.1561         | D    | 1614.7502        | 807.8787         | <b>1597.7237</b> | 799.3655         | 1596.7396        | 798.8735         | 14 |
| 8  | <b>876.3581</b>  | 438.6827         | 859.3316         | 430.1694         | <b>858.3476</b>  | 429.6774         | E    | 1499.7233        | 750.3653         | 1482.6967        | 741.8520         | 1481.7127        | 741.3600         | 13 |
| 9  | <b>989.4422</b>  | <b>495.2247</b>  | 972.4156         | 486.7115         | 971.4316         | 486.2195         | L    | 1370.6807        | <b>685.8440</b>  | 1353.6541        | 677.3307         | 1352.6701        | 676.8387         | 12 |
| 10 | <b>1117.5008</b> | <b>559.2540</b>  | 1100.4742        | 550.7408         | 1099.4902        | 550.2487         | Q    | 1257.5966        | <b>629.3019</b>  | 1240.5701        | <b>620.7887</b>  | 1239.5860        | <b>620.2967</b>  | 11 |
| 11 | <b>1230.5848</b> | <b>615.7961</b>  | <b>1213.5583</b> | <b>607.2828</b>  | <b>1212.5743</b> | <b>606.7908</b>  | L    | <b>1129.5380</b> | <b>565.2727</b>  | <b>1112.5115</b> | <b>556.7594</b>  | <b>1111.5275</b> | <b>556.2674</b>  | 10 |
| 12 | <b>1317.6169</b> | <b>659.3121</b>  | <b>1300.5903</b> | 650.7988         | <b>1299.6063</b> | 650.3068         | S    | <b>1016.4540</b> | <b>508.7306</b>  | 999.4274         | <b>500.2173</b>  | 998.4434         | 499.7253         | 9  |
| 13 | <b>1464.6523</b> | 732.8298         | <b>1447.6257</b> | <b>724.3165</b>  | <b>1446.6417</b> | <b>723.8245</b>  | M    | <b>929.4219</b>  | <b>465.2146</b>  | 912.3954         | 456.7013         |                  |                  | 8  |
| 14 | 1521.6737        | 761.3405         | 1504.6472        | 752.8272         | 1503.6632        | 752.3352         | G    | <b>782.3865</b>  | <b>391.6969</b>  | 765.3600         | 383.1836         |                  |                  | 7  |
| 15 | <b>1635.7167</b> | 818.3620         | 1618.6901        | 809.8487         | 1617.7061        | 809.3567         | N    | <b>725.3651</b>  | 363.1862         | 708.3385         | 354.6729         |                  |                  | 6  |
| 16 | <b>1706.7538</b> | <b>853.8805</b>  | 1689.7272        | 845.3672         | 1688.7432        | 844.8752         | A    | <b>611.3221</b>  | 306.1647         | 594.2956         | 297.6514         |                  |                  | 5  |
| 17 | <b>1853.7892</b> | <b>927.3982</b>  | <b>1836.7626</b> | 918.8849         | <b>1835.7786</b> | 918.3929         | M    | <b>540.2850</b>  | 270.6462         | 523.2585         | 262.1329         |                  |                  | 4  |
| 18 | 2000.8576        | <b>1000.9324</b> | 1983.8310        | <b>992.4192</b>  | 1982.8470        | <b>991.9271</b>  | F    | <b>393.2496</b>  | 197.1285         | 376.2231         | 188.6152         |                  |                  | 3  |
| 19 | 2099.9260        | <b>1050.4666</b> | 2082.8994        | <b>1041.9534</b> | 2081.9154        | <b>1041.4614</b> | V    | <b>246.1812</b>  | 123.5942         | 229.1547         | 115.0810         |                  |                  | 2  |
| 20 |                  |                  |                  |                  |                  |                  | K    | 147.1128         | 74.0600          | 130.0863         | 65.5468          |                  |                  | 1  |

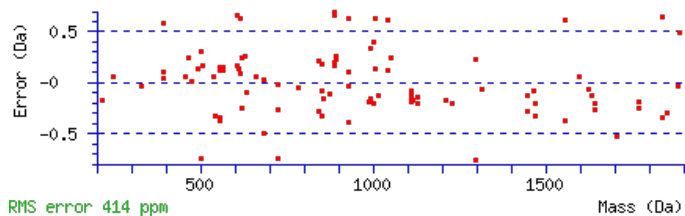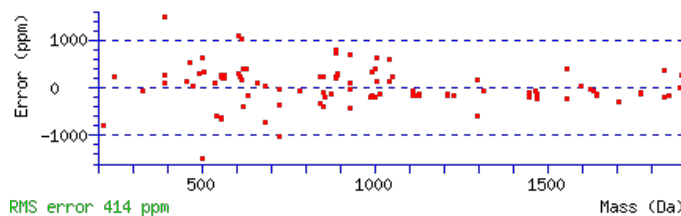

NCBI **BLAST** search of [TLNQSSDELQLSMGNAMFVK](#)  
 (Parameters: blastp, nr protein database, expect=20000, no filter, PAM30)  
 Other BLAST [web gateways](#)

**All matches to this query**

| Score | Mr(calc)  | Delta   | Sequence                               | Site Analysis        |
|-------|-----------|---------|----------------------------------------|----------------------|
| 73.6  | 2245.0242 | 0.0044  | <a href="#">TLNQSSDELQLSMGNAMFVK</a>   | Deamidated N3 90.75% |
| 63.6  | 2245.0242 | 0.0044  | <a href="#">TLNQSSDELQLSMGNAMFVK</a>   | Deamidated Q4 9.08%  |
| 46.0  | 2245.0242 | 0.0044  | <a href="#">TLNQSSDELQLSMGNAMFVK</a>   | Deamidated Q10 0.16% |
| 35.7  | 2245.0242 | 0.0044  | <a href="#">TLNQSSDELQLSMGNAMFVK</a>   | Deamidated N15 0.01% |
| 10.9  | 2244.0254 | 1.0032  | <a href="#">EPLLSSSENGNGGRETSPADAR</a> |                      |
| 7.4   | 2245.0354 | -0.0068 | <a href="#">RAETLMESNNAVISM RDEK</a>   |                      |
| 5.6   | 2245.0359 | -0.0073 | <a href="#">ENETTAHNTSGRSAPPSTNVR</a>  |                      |
| 5.6   | 2245.0359 | -0.0073 | <a href="#">ENETTAHNTSGRSAPPSTNVR</a>  |                      |
| 5.0   | 2245.0190 | 0.0096  | <a href="#">LSEYMVPDFFAFDHWNVK</a>     |                      |
| 4.8   | 2243.0277 | 2.0010  | <a href="#">RYDGAVQVMATQDGANFTAAR</a>  |                      |

Mascot: <http://www.matrixscience.com/>

# MATRIX SCIENCE Mascot Search Results

## Peptide View

MS/MS Fragmentation of **KLINDYVKNQTR**

Found in **G3V5I3** in **con\_Xuniprot\_HUMAN3**, G3V5I3\_HUMAN Alpha-1-antichymotrypsin OS=Homo sapiens GN=SERPINA3 PE=3 SV=1

Match to Query 2990: 1420.771428 from(711.392990,2+) intensity(129386.4219) rtinseconds(412) scans(797) index(23026)

Title: 111019\_Est\_MI\_YS\_G\_04Spectrum633\_scans\_797

Data file C:\\mascot\\20140703\_Tmgf\_1D\\CSV\_UseAnalysis\\MasterCSV\\All\_Glyco\\mgf\\ptm\\UC18ERLIC\_PTM\_35D.mgf

Click mouse within plot area to zoom in by factor of two about that point

Or, to Da

Label all possible matches Label matches used for scoring

Show Y-axis

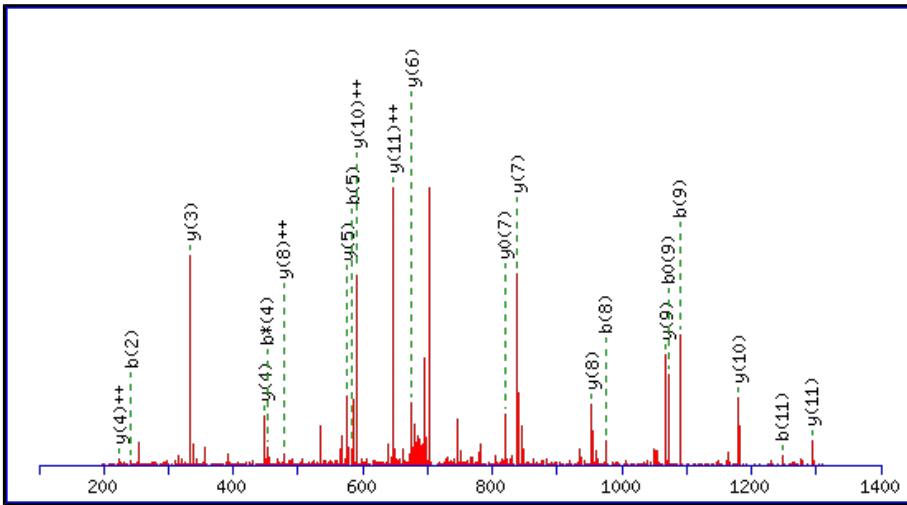

Monoisotopic mass of neutral peptide **Mr(calc)**: 1420.7674

Fixed modifications: Carbamidomethyl (C) (apply to specified residues or termini only)

Variable modifications:

N9 : Deamidated (NQ)

Ions Score: 68 Expect: 2.5e-005

Matches : 21/122 fragment ions using 36 most intense peaks ([help](#))

| #  | b                | b <sup>++</sup> | b <sup>*</sup>  | b <sup>***</sup> | b <sup>0</sup>   | b <sup>0++</sup> | Seq. | y                | y <sup>++</sup> | y <sup>*</sup> | y <sup>***</sup> | y <sup>0</sup>  | y <sup>0++</sup> | #  |
|----|------------------|-----------------|-----------------|------------------|------------------|------------------|------|------------------|-----------------|----------------|------------------|-----------------|------------------|----|
| 1  | 129.1022         | 65.0548         | 112.0757        | 56.5415          |                  |                  | K    |                  |                 |                |                  |                 |                  | 12 |
| 2  | <b>242.1863</b>  | 121.5968        | 225.1598        | 113.0835         |                  |                  | L    | <b>1293.6797</b> | <b>647.3435</b> | 1276.6532      | 638.8302         | 1275.6692       | 638.3382         | 11 |
| 3  | 355.2704         | 178.1388        | 338.2438        | 169.6255         |                  |                  | I    | <b>1180.5957</b> | <b>590.8015</b> | 1163.5691      | 582.2882         | 1162.5851       | 581.7962         | 10 |
| 4  | 469.3133         | 235.1603        | <b>452.2867</b> | 226.6470         |                  |                  | N    | <b>1067.5116</b> | 534.2594        | 1050.4851      | 525.7462         | 1049.5010       | 525.2542         | 9  |
| 5  | <b>584.3402</b>  | 292.6738        | 567.3137        | 284.1605         | 566.3297         | 283.6685         | D    | <b>953.4687</b>  | <b>477.2380</b> | 936.4421       | 468.7247         | 935.4581        | 468.2327         | 8  |
| 6  | 747.4036         | 374.2054        | 730.3770        | 365.6921         | 729.3930         | 365.2001         | Y    | <b>838.4417</b>  | 419.7245        | 821.4152       | 411.2112         | <b>820.4312</b> | 410.7192         | 7  |
| 7  | 846.4720         | 423.7396        | 829.4454        | 415.2264         | 828.4614         | 414.7343         | V    | <b>675.3784</b>  | 338.1928        | 658.3519       | 329.6796         | 657.3679        | 329.1876         | 6  |
| 8  | <b>974.5669</b>  | 487.7871        | 957.5404        | 479.2738         | 956.5564         | 478.7818         | K    | <b>576.3100</b>  | 288.6586        | 559.2835       | 280.1454         | 558.2994        | 279.6534         | 5  |
| 9  | <b>1089.5939</b> | 545.3006        | 1072.5673       | 536.7873         | <b>1071.5833</b> | 536.2953         | N    | <b>448.2150</b>  | <b>224.6112</b> | 431.1885       | 216.0979         | 430.2045        | 215.6059         | 4  |
| 10 | 1146.6154        | 573.8113        | 1129.5888       | 565.2980         | 1128.6048        | 564.8060         | G    | <b>333.1881</b>  | 167.0977        | 316.1615       | 158.5844         | 315.1775        | 158.0924         | 3  |
| 11 | <b>1247.6630</b> | 624.3352        | 1230.6365       | 615.8219         | 1229.6525        | 615.3299         | T    | 276.1666         | 138.5870        | 259.1401       | 130.0737         | 258.1561        | 129.5817         | 2  |
| 12 |                  |                 |                 |                  |                  |                  | R    | 175.1190         | 88.0631         | 158.0924       | 79.5498          |                 |                  | 1  |

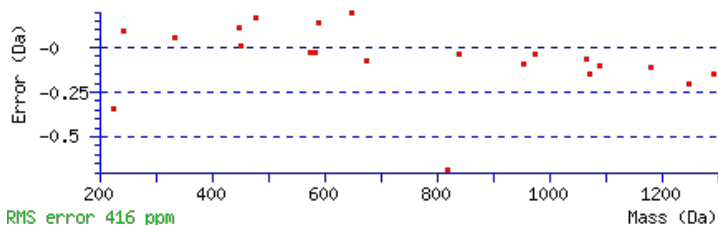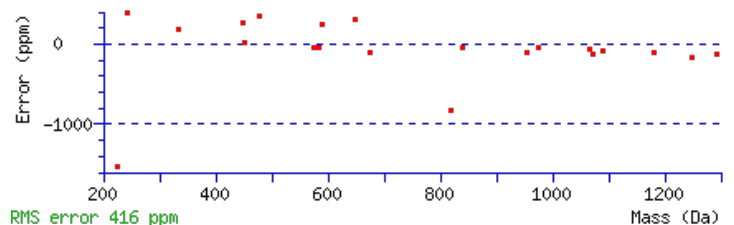

NCBI BLAST search of [KLINDYVKNGTR](#)

(Parameters: blastp, nr protein database, expect=20000, no filter, PAM30)

Other BLAST [web gateways](#)

**All matches to this query**

| Score | Mr(calc)  | Delta   | Sequence                      | Site Analysis        |
|-------|-----------|---------|-------------------------------|----------------------|
| 67.9  | 1420.7674 | 0.0040  | <a href="#">KLINDYVKNGTR</a>  | Deamidated N9 99.96% |
| 33.6  | 1420.7674 | 0.0040  | <a href="#">KLINDYVKNGTR</a>  | Deamidated N4 0.04%  |
| 16.7  | 1420.7714 | 0.0000  | <a href="#">KLLLNWVYNTR</a>   |                      |
| 11.8  | 1420.7786 | -0.0072 | <a href="#">QLLNKTKGYNSR</a>  |                      |
| 9.9   | 1420.7786 | -0.0072 | <a href="#">GANIDLIHLRGDK</a> |                      |
| 7.7   | 1420.7782 | -0.0067 | <a href="#">QIMMLSVLKNTK</a>  |                      |
| 7.7   | 1420.7782 | -0.0067 | <a href="#">QIMMLSVLKNTK</a>  |                      |
| 7.7   | 1420.7714 | 0.0000  | <a href="#">QLSEVYIKWQK</a>   |                      |
| 6.2   | 1420.7748 | -0.0034 | <a href="#">KIIMQYOAVAEK</a>  |                      |
| 5.7   | 1420.7674 | 0.0040  | <a href="#">ELTQRYLALSAR</a>  |                      |

Mascot: <http://www.matrixscience.com/>

# MATRIX SCIENCE Mascot Search Results

## Peptide View

MS/MS Fragmentation of **TLNQSSDELQLSMGNAMFVK**

Found in **G3V5I3** in **con\_Xuniprot\_HUMAN3**, G3V5I3\_HUMAN Alpha-1-antichymotrypsin OS=Homo sapiens GN=SERPINA3 PE=3 SV=1

Match to Query 14929: 2229.035892 from(744.019240,3+) intensity(167242.8906) rtinseconds(1584) scans(3962) index(26663)

Title: 111019\_Est\_MI\_YS\_G\_09Spectrum3433\_scans\_\_3962

Data file C:\mascot\20140703\_Tmgf\_1D\CSV\_UseAnalysis\MasterCSV\All\_Glyco\mgf\ptm\UC18ERLIC\_PTM\_35D.mgf

Click mouse within plot area to zoom in by factor of two about that point

Or, to Da

Label all possible matches Label matches used for scoring

Show Y-axis

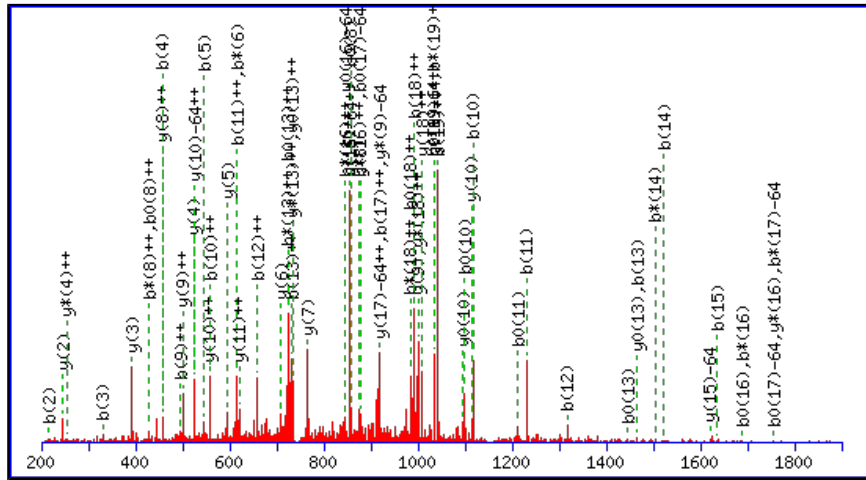

Monoisotopic mass of neutral peptide Mr(calc): 2229.0293

Fixed modifications: Carbamidomethyl (C) (apply to specified residues or termini only)

Variable modifications:

N3 : Deamidated (NQ)

M13 : Oxidation (M), with neutral losses 0.0000(shown in table), 63.9983

Ions Score: 68 Expect: 3.4e-005

Matches : 71/320 fragment ions using 96 most intense peaks ([help](#))

| #  | b                | b <sup>++</sup>  | b*               | b <sup>*++</sup> | b <sup>0</sup>   | b <sup>0++</sup> | Seq. | y                | y <sup>++</sup>  | y*               | y <sup>*++</sup> | y <sup>0</sup>   | y <sup>0++</sup> | #  |
|----|------------------|------------------|------------------|------------------|------------------|------------------|------|------------------|------------------|------------------|------------------|------------------|------------------|----|
| 1  | 102.0550         | 51.5311          |                  |                  | 84.0444          | 42.5258          | T    |                  |                  |                  |                  |                  |                  | 20 |
| 2  | <b>215.1390</b>  | 108.0731         |                  |                  | 197.1285         | 99.0679          | L    | 2128.9889        | 1064.9981        | 2111.9624        | 1056.4848        | 2110.9784        | 1055.9928        | 19 |
| 3  | <b>330.1660</b>  | 165.5866         | 313.1394         | 157.0733         | 312.1554         | 156.5813         | N    | 2015.9049        | <b>1008.4561</b> | 1998.8783        | <b>999.9428</b>  | 1997.8943        | 999.4508         | 18 |
| 4  | <b>458.2245</b>  | 229.6159         | 441.1980         | 221.1026         | 440.2140         | 220.6106         | Q    | 1900.8779        | 950.9426         | 1883.8514        | 942.4293         | 1882.8674        | 941.9373         | 17 |
| 5  | <b>545.2566</b>  | 273.1319         | 528.2300         | 264.6186         | 527.2460         | 264.1266         | S    | 1772.8193        | 886.9133         | <b>1755.7928</b> | <b>878.4000</b>  | 1754.8088        | <b>877.9080</b>  | 16 |
| 6  | 632.2886         | 316.6479         | <b>615.2620</b>  | 308.1347         | 614.2780         | 307.6427         | S    | 1685.7873        | 843.3973         | 1668.7608        | 834.8840         | 1667.7768        | 834.3920         | 15 |
| 7  | 747.3155         | 374.1614         | 730.2890         | 365.6481         | 729.3050         | 365.1561         | D    | 1598.7553        | 799.8813         | 1581.7287        | 791.3680         | 1580.7447        | 790.8760         | 14 |
| 8  | <b>876.3581</b>  | 438.6827         | 859.3316         | <b>430.1694</b>  | <b>858.3476</b>  | <b>429.6774</b>  | E    | 1483.7283        | 742.3678         | 1466.7018        | <b>733.8545</b>  | <b>1465.7178</b> | <b>733.3625</b>  | 13 |
| 9  | 989.4422         | <b>495.2247</b>  | 972.4156         | 486.7115         | 971.4316         | 486.2195         | L    | 1354.6858        | 677.8465         | 1337.6592        | 669.3332         | 1336.6752        | 668.8412         | 12 |
| 10 | <b>1117.5008</b> | <b>559.2540</b>  | 1100.4742        | 550.7408         | <b>1099.4902</b> | 550.2487         | Q    | 1241.6017        | <b>621.3045</b>  | 1224.5751        | 612.7912         | 1223.5911        | 612.2992         | 11 |
| 11 | <b>1230.5848</b> | <b>615.7961</b>  | 1213.5583        | 607.2828         | <b>1212.5743</b> | 606.7908         | L    | <b>1113.5431</b> | <b>557.2752</b>  | 1096.5166        | 548.7619         | <b>1095.5325</b> | 548.2699         | 10 |
| 12 | <b>1317.6169</b> | <b>659.3121</b>  | 1300.5903        | 650.7988         | 1299.6063        | 650.3068         | S    | <b>1000.4590</b> | <b>500.7332</b>  | 983.4325         | 492.2199         | 982.4485         | 491.7279         | 9  |
| 13 | <b>1464.6523</b> | <b>732.8298</b>  | 1447.6257        | <b>724.3165</b>  | <b>1446.6417</b> | <b>723.8245</b>  | M    | 913.4270         | <b>457.2171</b>  | 896.4005         | 448.7039         |                  |                  | 8  |
| 14 | <b>1521.6737</b> | 761.3405         | <b>1504.6472</b> | 752.8272         | 1503.6632        | 752.3352         | G    | <b>766.3916</b>  | 383.6994         | 749.3651         | 375.1862         |                  |                  | 7  |
| 15 | <b>1635.7167</b> | 818.3620         | 1618.6901        | 809.8487         | 1617.7061        | 809.3567         | N    | <b>709.3702</b>  | 355.1887         | 692.3436         | 346.6754         |                  |                  | 6  |
| 16 | 1706.7538        | <b>853.8805</b>  | <b>1689.7272</b> | <b>845.3672</b>  | <b>1688.7432</b> | <b>844.8752</b>  | A    | <b>595.3272</b>  | 298.1673         | 578.3007         | 289.6540         |                  |                  | 5  |
| 17 | 1837.7943        | <b>919.4008</b>  | 1820.7677        | 910.8875         | 1819.7837        | 910.3955         | M    | <b>524.2901</b>  | 262.6487         | 507.2636         | <b>254.1354</b>  |                  |                  | 4  |
| 18 | 1984.8627        | <b>992.9350</b>  | 1967.8361        | <b>984.4217</b>  | 1966.8521        | <b>983.9297</b>  | F    | <b>393.2496</b>  | 197.1285         | 376.2231         | 188.6152         |                  |                  | 3  |
| 19 | 2083.9311        | <b>1042.4692</b> | 2066.9045        | <b>1033.9559</b> | 2065.9205        | <b>1033.4639</b> | V    | <b>246.1812</b>  | 123.5942         | 229.1547         | 115.0810         |                  |                  | 2  |
| 20 |                  |                  |                  |                  |                  |                  | K    | 147.1128         | 74.0600          | 130.0863         | 65.5468          |                  |                  | 1  |

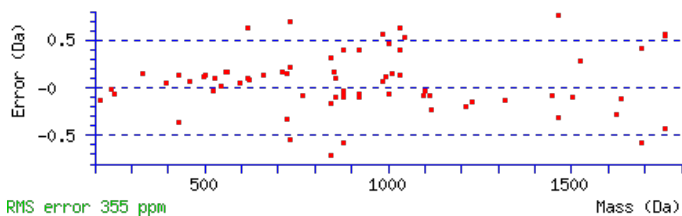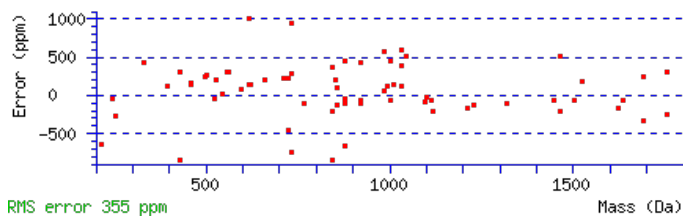

NCBI BLAST search of [TLNQSSDELQLSMGNAMFVK](#)  
 (Parameters: blastp, nr protein database, expect=20000, no filter, PAM30)  
 Other BLAST [web gateways](#)

**All matches to this query**

| Score | Mr(calc)  | Delta  | Sequence                                | Site Analysis                        |
|-------|-----------|--------|-----------------------------------------|--------------------------------------|
| 67.7  | 2229.0293 | 0.0066 | <a href="#">TLNQSSDELQLSMGNAMFVK</a>    | Deamidated N3, Oxidation M13; 85.52% |
| 59.9  | 2229.0293 | 0.0066 | <a href="#">TLNQSSDELQLSMGNAMFVK</a>    | Deamidated Q4, Oxidation M13; 14.16% |
| 41.3  | 2229.0293 | 0.0066 | <a href="#">TLNQSSDELQLSMGNAMFVK</a>    | Deamidated Q10, Oxidation M13; 0.20% |
| 37.3  | 2229.0293 | 0.0066 | <a href="#">TLNQSSDELQLSMGNAMFVK</a>    | Deamidated N3, Oxidation M17; 0.08%  |
| 31.7  | 2229.0293 | 0.0066 | <a href="#">TLNQSSDELQLSMGNAMFVK</a>    | Deamidated Q4, Oxidation M17; 0.02%  |
| 30.0  | 2229.0293 | 0.0066 | <a href="#">TLNQSSDELQLSMGNAMFVK</a>    | Deamidated N15, Oxidation M13; 0.01% |
| 27.5  | 2229.0293 | 0.0066 | <a href="#">TLNQSSDELQLSMGNAMFVK</a>    | Deamidated N15, Oxidation M17; 0.01% |
| 22.2  | 2229.0293 | 0.0066 | <a href="#">TLNQSSDELQLSMGNAMFVK</a>    | Deamidated Q10, Oxidation M17; 0.00% |
| 3.4   | 2229.0332 | 0.0027 | <a href="#">DDDSMGGSPGVPNAPTTRKRAQK</a> |                                      |
| 3.1   | 2227.0361 | 1.9998 | <a href="#">LMKNRDEVQAMIYDDGASR</a>     |                                      |

Mascot: <http://www.matrixscience.com/>



# MATRIX SCIENCE Mascot Search Results

## Peptide View

MS/MS Fragmentation of **LINDYVKNQTR**

Found in **G3V5I3** in **con\_Xuniprot\_HUMAN3**, G3V5I3\_HUMAN Alpha-1-antichymotrypsin OS=Homo sapiens GN=SERPINA3 PE=3 SV=1

Match to Query 1873: 1292.674468 from(647.344510,2+) intensity(414729.3125) rtinseconds(538) scans(1020) index(9983)

Title: 111019\_Est\_ISCardio\_NMI\_YS\_G\_6Spectrum832\_scans\_1020

Data file C:\mascot\20140703\_Tmgf\_1D\CSV\_UseAnalysis\MasterCSV\All\_Glyco\mgf\ptm\UC18ERLIC\_PTM\_35D.mgf

Click mouse within plot area to zoom in by factor of two about that point

Or, to Da

Label all possible matches Label matches used for scoring

Show Y-axis

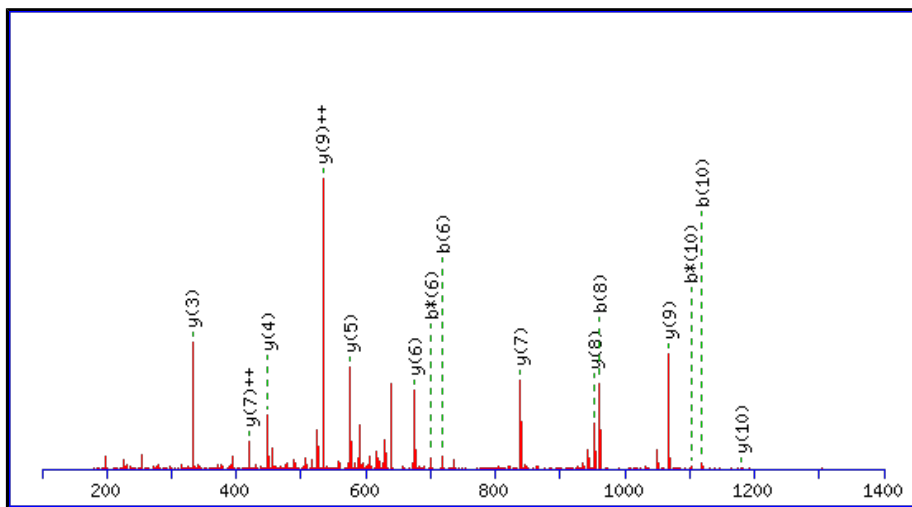

Monoisotopic mass of neutral peptide  $M_r(\text{calc})$ : 1292.6724

Fixed modifications: Carbamidomethyl (C) (apply to specified residues or termini only)

Variable modifications:

N8 : Deamidated (NQ)

Ions Score: 65 Expect: 6.1e-005

Matches : 15/108 fragment ions using 22 most intense peaks ([help](#))

| #  | b                | b <sup>++</sup> | b <sup>*</sup>   | b <sup>***</sup> | b <sup>0</sup> | b <sup>0++</sup> | Seq. | y                | y <sup>++</sup> | y <sup>*</sup> | y <sup>***</sup> | y <sup>0</sup> | y <sup>0++</sup> | #  |
|----|------------------|-----------------|------------------|------------------|----------------|------------------|------|------------------|-----------------|----------------|------------------|----------------|------------------|----|
| 1  | 114.0913         | 57.5493         |                  |                  |                |                  | L    |                  |                 |                |                  |                |                  | 11 |
| 2  | 227.1754         | 114.0913        |                  |                  |                |                  | I    | <b>1180.5957</b> | 590.8015        | 1163.5691      | 582.2882         | 1162.5851      | 581.7962         | 10 |
| 3  | 341.2183         | 171.1128        | 324.1918         | 162.5995         |                |                  | N    | <b>1067.5116</b> | <b>534.2594</b> | 1050.4851      | 525.7462         | 1049.5010      | 525.2542         | 9  |
| 4  | 456.2453         | 228.6263        | 439.2187         | 220.1130         | 438.2347       | 219.6210         | D    | <b>953.4687</b>  | 477.2380        | 936.4421       | 468.7247         | 935.4581       | 468.2327         | 8  |
| 5  | 619.3086         | 310.1579        | 602.2821         | 301.6447         | 601.2980       | 301.1527         | Y    | <b>838.4417</b>  | <b>419.7245</b> | 821.4152       | 411.2112         | 820.4312       | 410.7192         | 7  |
| 6  | <b>718.3770</b>  | 359.6921        | <b>701.3505</b>  | 351.1789         | 700.3665       | 350.6869         | V    | <b>675.3784</b>  | 338.1928        | 658.3519       | 329.6796         | 657.3678       | 329.1876         | 6  |
| 7  | 846.4720         | 423.7396        | 829.4454         | 415.2264         | 828.4614       | 414.7343         | K    | <b>576.3100</b>  | 288.6586        | 559.2835       | 280.1454         | 558.2994       | 279.6534         | 5  |
| 8  | <b>961.4989</b>  | 481.2531        | 944.4724         | 472.7398         | 943.4884       | 472.2478         | N    | <b>448.2150</b>  | 224.6112        | 431.1885       | 216.0979         | 430.2045       | 215.6059         | 4  |
| 9  | 1018.5204        | 509.7638        | 1001.4938        | 501.2506         | 1000.5098      | 500.7585         | G    | <b>333.1881</b>  | 167.0977        | 316.1615       | 158.5844         | 315.1775       | 158.0924         | 3  |
| 10 | <b>1119.5681</b> | 560.2877        | <b>1102.5415</b> | 551.7744         | 1101.5575      | 551.2824         | T    | 276.1666         | 138.5870        | 259.1401       | 130.0737         | 258.1561       | 129.5817         | 2  |
| 11 |                  |                 |                  |                  |                |                  | R    | 175.1190         | 88.0631         | 158.0924       | 79.5498          |                |                  | 1  |

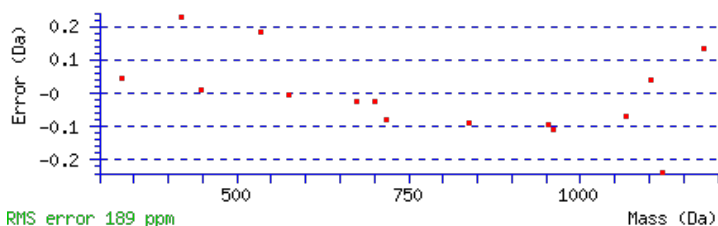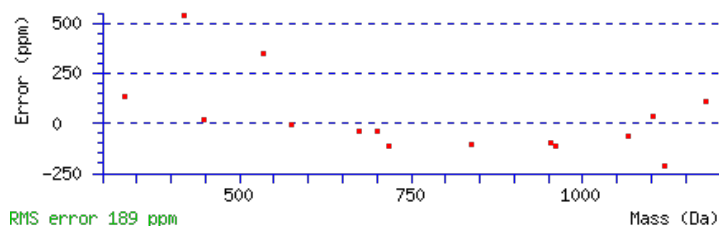

NCBI BLAST search of [LINDYVKNQTR](#)

(Parameters: blastp, nr protein database, expect=20000, no filter, PAM30)

Other BLAST [web gateways](#)

**All matches to this query**

| Score | Mr(calc)  | Delta   | Sequence                     | Site Analysis         |
|-------|-----------|---------|------------------------------|-----------------------|
| 65.3  | 1292.6724 | 0.0020  | <a href="#">LINDYVKNQTR</a>  | Deamidated N8 100.00% |
| 13.4  | 1292.6724 | 0.0020  | <a href="#">LINDYVKNQTR</a>  | Deamidated N3 0.00%   |
| 9.1   | 1292.6733 | 0.0011  | <a href="#">ILNMCQVIER</a>   |                       |
| 5.1   | 1292.6720 | 0.0025  | <a href="#">LLQTMDMIISK</a>  |                       |
| 4.5   | 1292.6765 | -0.0020 | <a href="#">LLLNWVYNTR</a>   |                       |
| 2.8   | 1292.6724 | 0.0020  | <a href="#">LLQYRQVQSR</a>   |                       |
| 1.5   | 1292.6758 | -0.0013 | <a href="#">TKESQSVQKMK</a>  |                       |
| 1.0   | 1292.6724 | 0.0020  | <a href="#">ILAESVANSAYR</a> |                       |
| 0.9   | 1292.6758 | -0.0013 | <a href="#">NKNSKLTLQMR</a>  |                       |
| 0.8   | 1291.6740 | 1.0004  | <a href="#">LLRVMQCLSR</a>   |                       |

**Mascot:** <http://www.matrixscience.com/>

# MASCOT SCIENCE Mascot Search Results

## Peptide View

MS/MS Fragmentation of **KLINDYVKNQTR**

Found in **G3V5I3** in **con\_Xuniprot\_HUMAN3**, G3V5I3\_HUMAN Alpha-1-antichymotrypsin OS=Homo sapiens GN=SERPINA3 PE=3 SV=1

Match to Query 3025: 1421.754132 from(474.925320,3+) intensity(10532.8223) rtinseconds(353) scans(722) index(24326)

Title: 111019\_Est\_MI\_YS\_G\_06Spectrum610\_scans\_722

Data file C:\mascot\20140703\_Tmgf\_1D\CSV\_UseAnalysis\MasterCSV\All\_Glyco\mgf\ptm\UC18ERLIC\_PTM\_35D.mgf

Click mouse within plot area to zoom in by factor of two about that point

Or, to Da

Label all possible matches Label matches used for scoring

Show Y-axis

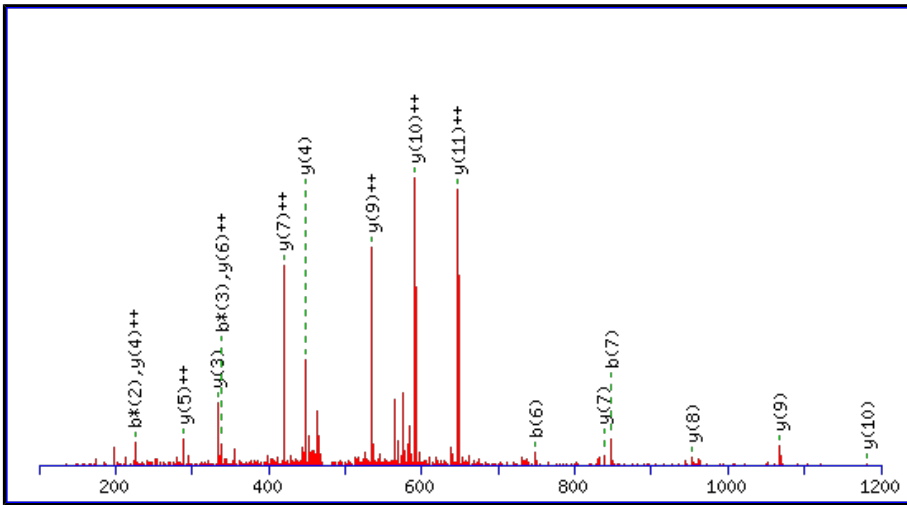

Monoisotopic mass of neutral peptide Mr(calc): 1421.7514

Fixed modifications: Carbamidomethyl (C) (apply to specified residues or termini only)

Variable modifications:

N4 : Deamidated (NQ)

N9 : Deamidated (NQ)

Ions Score: 65 Expect: 5.5e-005

Matches : 17/122 fragment ions using 21 most intense peaks ([help](#))

| #  | b               | b <sup>++</sup> | b <sup>*</sup>  | b <sup>***</sup> | b <sup>0</sup> | b <sup>0++</sup> | Seq.     | y                | y <sup>++</sup> | y <sup>*</sup> | y <sup>***</sup> | y <sup>0</sup> | y <sup>0++</sup> | #         |
|----|-----------------|-----------------|-----------------|------------------|----------------|------------------|----------|------------------|-----------------|----------------|------------------|----------------|------------------|-----------|
| 1  | 129.1022        | 65.0548         | 112.0757        | 56.5415          |                |                  | <b>K</b> |                  |                 |                |                  |                |                  | <b>12</b> |
| 2  | 242.1863        | 121.5968        | <b>225.1598</b> | 113.0835         |                |                  | <b>L</b> | 1294.6638        | <b>647.8355</b> | 1277.6372      | 639.3222         | 1276.6532      | 638.8302         | <b>11</b> |
| 3  | 355.2704        | 178.1388        | <b>338.2438</b> | 169.6255         |                |                  | <b>I</b> | <b>1181.5797</b> | <b>591.2935</b> | 1164.5531      | 582.7802         | 1163.5691      | 582.2882         | <b>10</b> |
| 4  | 470.2973        | 235.6523        | 453.2708        | 227.1390         |                |                  | <b>N</b> | <b>1068.4956</b> | <b>534.7515</b> | 1051.4691      | 526.2382         | 1050.4851      | 525.7462         | <b>9</b>  |
| 5  | 585.3243        | 293.1658        | 568.2977        | 284.6525         | 567.3137       | 284.1605         | <b>D</b> | <b>953.4687</b>  | 477.2380        | 936.4421       | 468.7247         | 935.4581       | 468.2327         | <b>8</b>  |
| 6  | <b>748.3876</b> | 374.6974        | 731.3610        | 366.1842         | 730.3770       | 365.6921         | <b>Y</b> | <b>838.4417</b>  | <b>419.7245</b> | 821.4152       | 411.2112         | 820.4312       | 410.7192         | <b>7</b>  |
| 7  | <b>847.4560</b> | 424.2316        | 830.4294        | 415.7184         | 829.4454       | 415.2264         | <b>V</b> | 675.3784         | <b>338.1928</b> | 658.3519       | 329.6796         | 657.3679       | 329.1876         | <b>6</b>  |
| 8  | 975.5510        | 488.2791        | 958.5244        | 479.7658         | 957.5404       | 479.2738         | <b>K</b> | 576.3100         | <b>288.6586</b> | 559.2835       | 280.1454         | 558.2994       | 279.6534         | <b>5</b>  |
| 9  | 1090.5779       | 545.7926        | 1073.5514       | 537.2793         | 1072.5673      | 536.7873         | <b>N</b> | <b>448.2150</b>  | <b>224.6112</b> | 431.1885       | 216.0979         | 430.2045       | 215.6059         | <b>4</b>  |
| 10 | 1147.5994       | 574.3033        | 1130.5728       | 565.7900         | 1129.5888      | 565.2980         | <b>G</b> | <b>333.1881</b>  | 167.0977        | 316.1615       | 158.5844         | 315.1775       | 158.0924         | <b>3</b>  |
| 11 | 1248.6470       | 624.8272        | 1231.6205       | 616.3139         | 1230.6365      | 615.8219         | <b>T</b> | 276.1666         | 138.5870        | 259.1401       | 130.0737         | 258.1561       | 129.5817         | <b>2</b>  |
| 12 |                 |                 |                 |                  |                |                  | <b>R</b> | 175.1190         | 88.0631         | 158.0924       | 79.5498          |                |                  | <b>1</b>  |

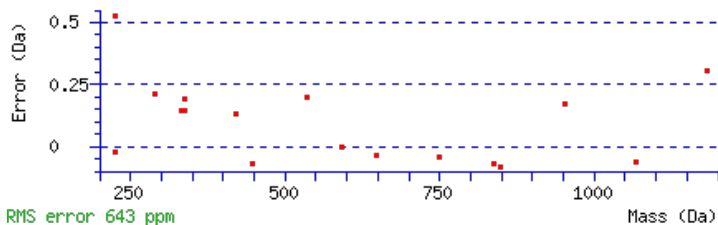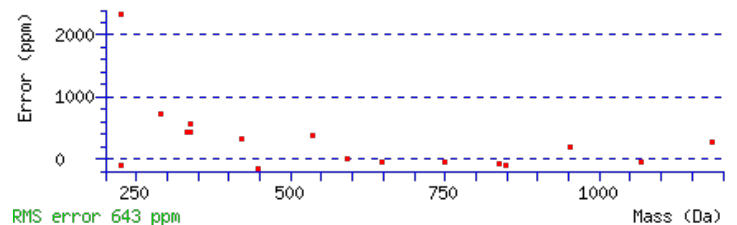

NCBI **BLAST** search of [KLINDYVKNQTR](#)

(Parameters: blastp, nr protein database, expect=20000, no filter, PAM30)

Other BLAST [web gateways](#)

**All matches to this query**

| Score | Mr(calc)  | Delta   | Sequence                       |
|-------|-----------|---------|--------------------------------|
| 65.0  | 1421.7514 | 0.0027  | <a href="#">KLINDYVKNQTR</a>   |
| 12.5  | 1419.7544 | 1.9997  | <a href="#">AMEVVVKVGGPVYR</a> |
| 12.5  | 1419.7544 | 1.9997  | <a href="#">SMEVVVKVGGPVYR</a> |
| 9.9   | 1421.7548 | -0.0006 | <a href="#">KLSMSSIETASLR</a>  |
| 9.9   | 1421.7588 | -0.0047 | <a href="#">KIIMQYQAVAEK</a>   |
| 9.9   | 1421.7588 | -0.0047 | <a href="#">KIIMQYQAVAEK</a>   |
| 9.9   | 1421.7523 | 0.0018  | <a href="#">KILHAGFKMMSK</a>   |
| 6.5   | 1420.7562 | 0.9979  | <a href="#">QIYGGLVGDVSSVK</a> |
| 6.0   | 1419.7544 | 1.9997  | <a href="#">QIMHQPIPLIR</a>    |
| 5.4   | 1420.7561 | 0.9980  | <a href="#">KLYQLENEKVR</a>    |

Mascot: <http://www.matrixscience.com/>

# MASCOT SCIENCE Mascot Search Results

## Peptide View

MS/MS Fragmentation of **GLKFNLTETSEAEIHQSFQHLLR**

Found in **G3V513** in **con\_Xuniprot\_HUMAN3**, G3V5I3\_HUMAN Alpha-1-antichymotrypsin OS=Homo sapiens GN=SERPINA3 PE=3 SV=1

Match to Query 25347: 2698.380856 from(675.602490,4+) intensity(30417.6230) rtinseconds(2133) scans(5220) index(11955)

Title: 111019\_Est\_ISCardio\_NMI\_YS\_G\_8Spectrum4513\_scans\_\_5220

Data file C:\mascot\20140703\_Tmgf\_1D\CSV\_UseAnalysis\MasterCSV\All\_Glyco\mgf\ptm\UC18ERLIC\_PTM\_35D.mgf

Click mouse within plot area to zoom in by factor of two about that point

Or, to Da

Label all possible matches Label matches used for scoring

Show Y-axis

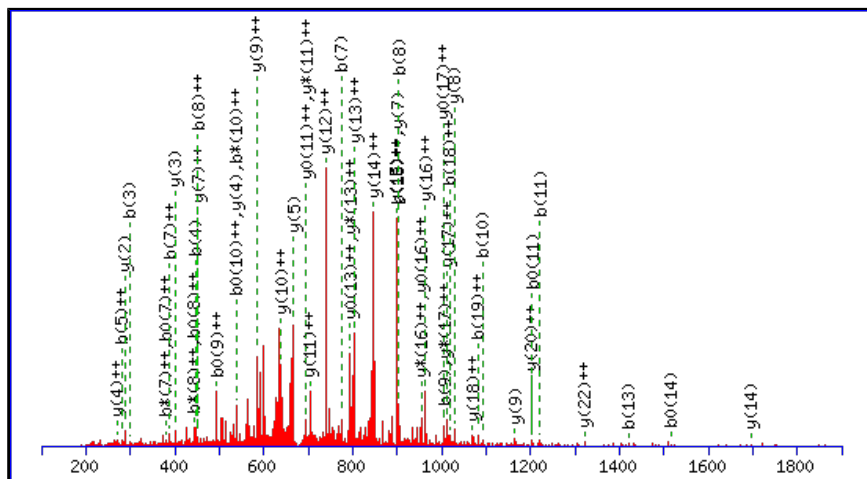

Monoisotopic mass of neutral peptide Mr(calc): 2698.3714

Fixed modifications: Carbamidomethyl (C) (apply to specified residues or termini only)

Variable modifications:

N5 : Deamidated (NQ)

Ions Score: 58 Expect: 0.00036

Matches : 53/236 fragment ions using 108 most intense peaks ([help](#))

| #  | b         | b <sup>++</sup> | b <sup>*</sup> | b <sup>*++</sup> | b <sup>0</sup> | b <sup>0++</sup> | Seq. | y         | y <sup>++</sup> | y <sup>*</sup> | y <sup>*++</sup> | y <sup>0</sup> | y <sup>0++</sup> | #  |
|----|-----------|-----------------|----------------|------------------|----------------|------------------|------|-----------|-----------------|----------------|------------------|----------------|------------------|----|
| 1  | 58.0287   | 29.5180         |                |                  |                |                  | G    |           |                 |                |                  |                |                  | 23 |
| 2  | 171.1128  | 86.0600         |                |                  |                |                  | L    | 2642.3573 | 1321.6823       | 2625.3307      | 1313.1690        | 2624.3467      | 1312.6770        | 22 |
| 3  | 299.2078  | 150.1075        | 282.1812       | 141.5942         |                |                  | K    | 2529.2732 | 1265.1403       | 2512.2467      | 1256.6270        | 2511.2627      | 1256.1350        | 21 |
| 4  | 446.2762  | 223.6417        | 429.2496       | 215.1285         |                |                  | F    | 2401.1783 | 1201.0928       | 2384.1517      | 1192.5795        | 2383.1677      | 1192.0875        | 20 |
| 5  | 561.3031  | 281.1552        | 544.2766       | 272.6419         |                |                  | N    | 2254.1099 | 1127.5586       | 2237.0833      | 1119.0453        | 2236.0993      | 1118.5533        | 19 |
| 6  | 674.3872  | 337.6972        | 657.3606       | 329.1840         |                |                  | L    | 2139.0829 | 1070.0451       | 2122.0564      | 1061.5318        | 2121.0723      | 1061.0398        | 18 |
| 7  | 775.4349  | 388.2211        | 758.4083       | 379.7078         | 757.4243       | 379.2158         | T    | 2025.9988 | 1013.5031       | 2008.9723      | 1004.9898        | 2007.9883      | 1004.4978        | 17 |
| 8  | 904.4775  | 452.7424        | 887.4509       | 444.2291         | 886.4669       | 443.7371         | E    | 1924.9512 | 962.9792        | 1907.9246      | 954.4659         | 1906.9406      | 953.9739         | 16 |
| 9  | 1005.5251 | 503.2662        | 988.4986       | 494.7529         | 987.5146       | 494.2609         | T    | 1795.9086 | 898.4579        | 1778.8820      | 889.9447         | 1777.8980      | 889.4526         | 15 |
| 10 | 1092.5572 | 546.7822        | 1075.5306      | 538.2689         | 1074.5466      | 537.7769         | S    | 1694.8609 | 847.9341        | 1677.8343      | 839.4208         | 1676.8503      | 838.9288         | 14 |
| 11 | 1221.5998 | 611.3035        | 1204.5732      | 602.7902         | 1203.5892      | 602.2982         | E    | 1607.8289 | 804.4181        | 1590.8023      | 795.9048         | 1589.8183      | 795.4128         | 13 |
| 12 | 1292.6369 | 646.8221        | 1275.6103      | 638.3088         | 1274.6263      | 637.8168         | A    | 1478.7863 | 739.8968        | 1461.7597      | 731.3835         | 1460.7757      | 730.8915         | 12 |
| 13 | 1421.6795 | 711.3434        | 1404.6529      | 702.8301         | 1403.6689      | 702.3381         | E    | 1407.7492 | 704.3782        | 1390.7226      | 695.8649         | 1389.7386      | 695.3729         | 11 |
| 14 | 1534.7635 | 767.8854        | 1517.7370      | 759.3721         | 1516.7530      | 758.8801         | I    | 1278.7066 | 639.8569        | 1261.6800      | 631.3436         | 1260.6960      | 630.8516         | 10 |
| 15 | 1671.8224 | 836.4149        | 1654.7959      | 827.9016         | 1653.8119      | 827.4096         | H    | 1165.6225 | 583.3149        | 1148.5960      | 574.8016         | 1147.6119      | 574.3096         | 9  |
| 16 | 1799.8810 | 900.4441        | 1782.8545      | 891.9309         | 1781.8705      | 891.4389         | Q    | 1028.5636 | 514.7854        | 1011.5370      | 506.2722         | 1010.5530      | 505.7802         | 8  |
| 17 | 1886.9130 | 943.9602        | 1869.8865      | 935.4469         | 1868.9025      | 934.9549         | S    | 900.5050  | 450.7561        | 883.4785       | 442.2429         | 882.4944       | 441.7509         | 7  |
| 18 | 2033.9815 | 1017.4944       | 2016.9549      | 1008.9811        | 2015.9709      | 1008.4891        | F    | 813.4730  | 407.2401        | 796.4464       | 398.7269         |                |                  | 6  |
| 19 | 2162.0400 | 1081.5237       | 2145.0135      | 1073.0104        | 2144.0295      | 1072.5184        | Q    | 666.4046  | 333.7059        | 649.3780       | 325.1926         |                |                  | 5  |
| 20 | 2299.0990 | 1150.0531       | 2282.0724      | 1141.5398        | 2281.0884      | 1141.0478        | H    | 538.3460  | 269.6766        | 521.3194       | 261.1634         |                |                  | 4  |
| 21 | 2412.1830 | 1206.5951       | 2395.1565      | 1198.0819        | 2394.1725      | 1197.5899        | L    | 401.2871  | 201.1472        | 384.2605       | 192.6339         |                |                  | 3  |
| 22 | 2525.2671 | 1263.1372       | 2508.2405      | 1254.6239        | 2507.2565      | 1254.1319        | L    | 288.2030  | 144.6051        | 271.1765       | 136.0919         |                |                  | 2  |
| 23 |           |                 |                |                  |                |                  | R    | 175.1190  | 88.0631         | 158.0924       | 79.5498          |                |                  | 1  |

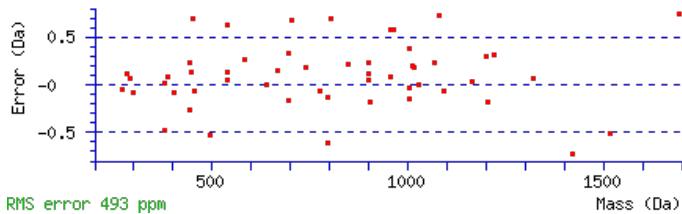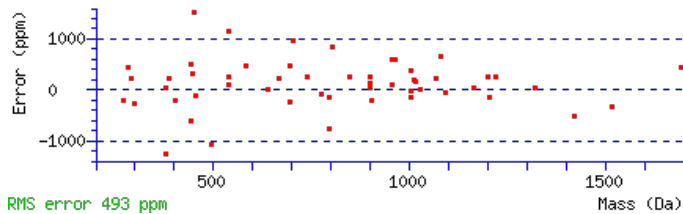

NCBI **BLAST** search of [GLKFNL TETSEAEIHQSFOHLLR](#)  
 (Parameters: blastp, nr protein database, expect=20000, no filter, PAM30)  
 Other BLAST [web gateways](#)

**All matches to this query**

| Score | Mr(calc)  | Delta  | Sequence                                 | Site Analysis         |
|-------|-----------|--------|------------------------------------------|-----------------------|
| 58.1  | 2698.3714 | 0.0094 | <a href="#">GLKFNL TETSEAEIHQSFOHLLR</a> | Deamidated N5 41.32%  |
| 57.2  | 2698.3714 | 0.0094 | <a href="#">GLKFNL TETSEAEIHQSFOHLLR</a> | Deamidated Q16 33.20% |
| 56.5  | 2697.3874 | 0.9934 | <a href="#">GLKFNL TETSEAEIHQSFOHLLR</a> |                       |
| 56.0  | 2698.3714 | 0.0094 | <a href="#">GLKFNL TETSEAEIHQSFOHLLR</a> | Deamidated Q19 25.48% |
| 7.3   | 2697.3874 | 0.9934 | <a href="#">KVEQDLWNHAFKNQITTLQGQAK</a>  |                       |
| 7.3   | 2697.3874 | 0.9934 | <a href="#">KVEQDLWNHAFKNQITTLQGQAK</a>  |                       |
| 6.4   | 2698.3714 | 0.0094 | <a href="#">KVEQDLWNHAFKNQITTLQGQAK</a>  |                       |
| 6.4   | 2698.3714 | 0.0094 | <a href="#">KVEQDLWNHAFKNQITTLQGQAK</a>  |                       |
| 6.3   | 2696.3802 | 2.0006 | <a href="#">NERELMLISHQKSIEQLQETLR</a>   |                       |
| 6.3   | 2696.3802 | 2.0006 | <a href="#">NERELMLISHQKSIEQLQETLR</a>   |                       |

Mascot: <http://www.matrixscience.com/>

# MATRIX SCIENCE Mascot Search Results

## Peptide View

MS/MS Fragmentation of **GLKFNLTETSEAEIHQSFQHLLR**

Found in **G3V513** in **con\_Xuniprot\_HUMAN3**, G3V513\_HUMAN Alpha-1-antichymotrypsin OS=Homo sapiens GN=SERPINA3 PE=3 SV=1

Match to Query 25354: 2699.363016 from(675.848030,4+) intensity(12991.5576) rtinseconds(2788) scans(7393) index(19034)

Title: 111019\_Est\_ML\_YP\_G\_08Spectrum6469\_scans\_\_7393

Data file C:\mascot\20140703\_Tmgf\_1D\CSV\_UseAnalysis\MasterCSV\All\_Glyco\mgf\ptm\UC18ERLIC\_PTM\_35D.mgf

Click mouse within plot area to zoom in by factor of two about that point

Or, to Da

Label all possible matches Label matches used for scoring

Show Y-axis

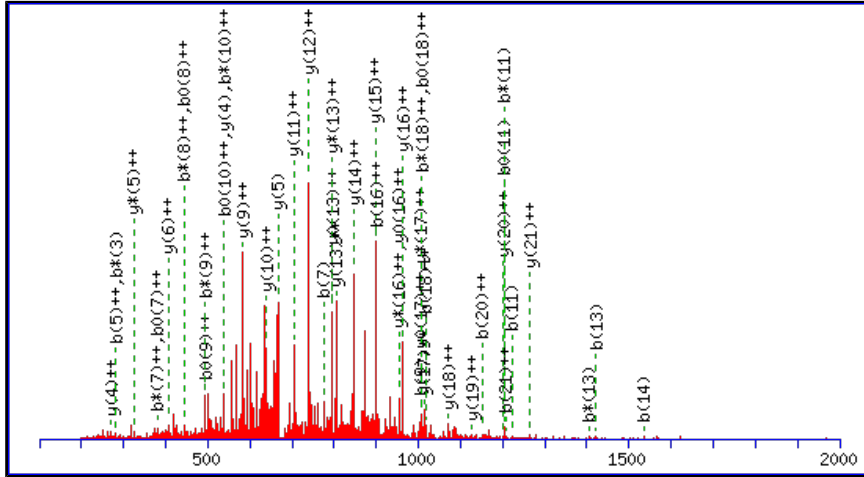

Monoisotopic mass of neutral peptide Mr(calc): 2699.3555

Fixed modifications: Carbamidomethyl (C) (apply to specified residues or termini only)

Variable modifications:

N5 : Deamidated (NQ)

Q19 : Deamidated (NQ)

Ions Score: 54 Expect: 0.0011

Matches : 48/236 fragment ions using 114 most intense peaks ([help](#))

| #  | b         | b <sup>++</sup> | b <sup>*</sup> | b <sup>*++</sup> | b <sup>0</sup> | b <sup>0++</sup> | Seq. | y         | y <sup>++</sup> | y <sup>*</sup> | y <sup>*++</sup> | y <sup>0</sup> | y <sup>0++</sup> | #  |
|----|-----------|-----------------|----------------|------------------|----------------|------------------|------|-----------|-----------------|----------------|------------------|----------------|------------------|----|
| 1  | 58.0287   | 29.5180         |                |                  |                |                  | G    |           |                 |                |                  |                |                  | 23 |
| 2  | 171.1128  | 86.0600         |                |                  |                |                  | L    | 2643.3413 | 1322.1743       | 2626.3148      | 1313.6610        | 2625.3307      | 1313.1690        | 22 |
| 3  | 299.2078  | 150.1075        | 282.1812       | 141.5942         |                |                  | K    | 2530.2572 | 1265.6323       | 2513.2307      | 1257.1190        | 2512.2467      | 1256.6270        | 21 |
| 4  | 446.2762  | 223.6417        | 429.2496       | 215.1285         |                |                  | F    | 2402.1623 | 1201.5848       | 2385.1357      | 1193.0715        | 2384.1517      | 1192.5795        | 20 |
| 5  | 561.3031  | 281.1552        | 544.2766       | 272.6419         |                |                  | N    | 2255.0939 | 1128.0506       | 2238.0673      | 1119.5373        | 2237.0833      | 1119.0453        | 19 |
| 6  | 674.3872  | 337.6972        | 657.3606       | 329.1840         |                |                  | L    | 2140.0669 | 1070.5371       | 2123.0404      | 1062.0238        | 2122.0564      | 1061.5318        | 18 |
| 7  | 775.4349  | 388.2211        | 758.4083       | 379.7078         | 757.4243       | 379.2158         | T    | 2026.9829 | 1013.9951       | 2009.9563      | 1005.4818        | 2008.9723      | 1004.9898        | 17 |
| 8  | 904.4775  | 452.7424        | 887.4509       | 444.2291         | 886.4669       | 443.7371         | E    | 1925.9352 | 963.4712        | 1908.9086      | 954.9580         | 1907.9246      | 954.4659         | 16 |
| 9  | 1005.5251 | 503.2662        | 988.4986       | 494.7529         | 987.5146       | 494.2609         | T    | 1796.8926 | 898.9499        | 1779.8660      | 890.4367         | 1778.8820      | 889.9447         | 15 |
| 10 | 1092.5572 | 546.7822        | 1075.5306      | 538.2689         | 1074.5466      | 537.7769         | S    | 1695.8449 | 848.4261        | 1678.8184      | 839.9128         | 1677.8343      | 839.4208         | 14 |
| 11 | 1221.5998 | 611.3035        | 1204.5732      | 602.7902         | 1203.5892      | 602.2982         | E    | 1608.8129 | 804.9101        | 1591.7863      | 796.3968         | 1590.8023      | 795.9048         | 13 |
| 12 | 1292.6369 | 646.8221        | 1275.6103      | 638.3088         | 1274.6263      | 637.8168         | A    | 1479.7703 | 740.3888        | 1462.7437      | 731.8755         | 1461.7597      | 731.3835         | 12 |
| 13 | 1421.6795 | 711.3434        | 1404.6529      | 702.8301         | 1403.6689      | 702.3381         | E    | 1408.7332 | 704.8702        | 1391.7066      | 696.3570         | 1390.7226      | 695.8649         | 11 |
| 14 | 1534.7635 | 767.8854        | 1517.7370      | 759.3721         | 1516.7530      | 758.8801         | I    | 1279.6906 | 640.3489        | 1262.6640      | 631.8357         | 1261.6800      | 631.3436         | 10 |
| 15 | 1671.8224 | 836.4149        | 1654.7959      | 827.9016         | 1653.8119      | 827.4096         | H    | 1166.6065 | 583.8069        | 1149.5800      | 575.2936         | 1148.5960      | 574.8016         | 9  |
| 16 | 1799.8810 | 900.4441        | 1782.8545      | 891.9309         | 1781.8705      | 891.4389         | Q    | 1029.5476 | 515.2774        | 1012.5211      | 506.7642         | 1011.5370      | 506.2722         | 8  |
| 17 | 1886.9130 | 943.9602        | 1869.8865      | 935.4469         | 1868.9025      | 934.9549         | S    | 901.4890  | 451.2482        | 884.4625       | 442.7349         | 883.4785       | 442.2429         | 7  |
| 18 | 2033.9815 | 1017.4944       | 2016.9549      | 1008.9811        | 2015.9709      | 1008.4891        | F    | 814.4570  | 407.7321        | 797.4305       | 399.2189         |                |                  | 6  |
| 19 | 2163.0241 | 1082.0157       | 2145.9975      | 1073.5024        | 2145.0135      | 1073.0104        | Q    | 667.3886  | 334.1979        | 650.3620       | 325.6847         |                |                  | 5  |
| 20 | 2300.0830 | 1150.5451       | 2283.0564      | 1142.0318        | 2282.0724      | 1141.5398        | H    | 538.3460  | 269.6766        | 521.3194       | 261.1634         |                |                  | 4  |
| 21 | 2413.1670 | 1207.0872       | 2396.1405      | 1198.5739        | 2395.1565      | 1198.0819        | L    | 401.2871  | 201.1472        | 384.2605       | 192.6339         |                |                  | 3  |
| 22 | 2526.2511 | 1263.6292       | 2509.2245      | 1255.1159        | 2508.2405      | 1254.6239        | L    | 288.2030  | 144.6051        | 271.1765       | 136.0919         |                |                  | 2  |



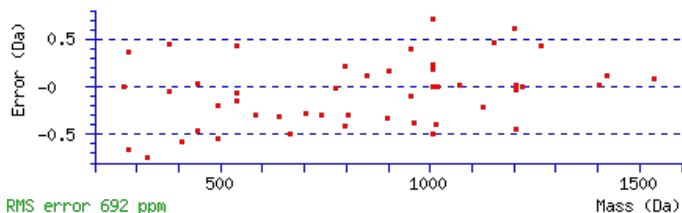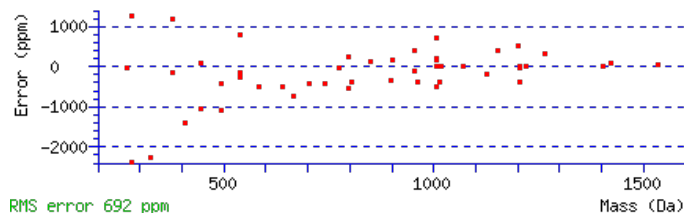

NCBI BLAST search of [GLKFNL TETSEAEIHQS FQHLLR](#)

(Parameters: blastp, nr protein database, expect=20000, no filter, PAM30)

Other BLAST [web gateways](#)

All matches to this query

| Score | Mr(calc)  | Delta  | Sequence                                   | Site Analysis             |
|-------|-----------|--------|--------------------------------------------|---------------------------|
| 53.7  | 2699.3555 | 0.0076 | <a href="#">GLKFNL TETSEAEIHQS FQHLLR</a>  | Deamidated N5, Q19 49.98% |
| 53.7  | 2699.3555 | 0.0076 | <a href="#">GLKFNL TETSEAEIHQS FQHLLR</a>  | Deamidated N5, Q16 49.98% |
| 44.1  | 2698.3714 | 0.9916 | <a href="#">GLKFNL TETSEAEIHQS FQHLLR</a>  |                           |
| 22.9  | 2698.3714 | 0.9916 | <a href="#">GLKFNL TETSEAEIHQS FQHLLR</a>  |                           |
| 22.9  | 2698.3714 | 0.9916 | <a href="#">GLKFNL TETSEAEIHQS FQHLLR</a>  |                           |
| 22.2  | 2699.3555 | 0.0076 | <a href="#">GLKFNL TETSEAEIHQS FQHLLR</a>  | Deamidated Q16, Q19 0.03% |
| 7.7   | 2699.3550 | 0.0080 | <a href="#">NASMKTFGVIDAFLISVEEIQQMK</a>   |                           |
| 7.7   | 2699.3550 | 0.0080 | <a href="#">NASMKTFGVIDAFLISVEEIQQMK</a>   |                           |
| 6.1   | 2698.3674 | 0.9956 | <a href="#">QASSQLSRGSATTPRGVLHTESPSPK</a> |                           |
| 5.1   | 2698.3714 | 0.9916 | <a href="#">KVEQDLWNHAFKNQITTLQGQAK</a>    |                           |

Mascot: <http://www.matrixscience.com/>

# MATRIX SCIENCE Mascot Search Results

## Peptide View

MS/MS Fragmentation of **LINDYVKNQTR**

Found in **G3V5I3** in **con\_Xuniprot\_HUMAN3**, G3V5I3\_HUMAN Alpha-1-antichymotrypsin OS=Homo sapiens GN=SERPINA3 PE=3 SV=1

Match to Query 1961: 1293.658828 from(647.836690,2+) intensity(11714.5625) rtinseconds(572) scans(1173) index(10759)

Title: 111019\_Est\_ISCardio\_NMI\_YS\_G\_7Spectrum956\_scans\_\_1173

Data file C:\\mascot\\20140703\_Tmgf\_1D\\CSV\_UseAnalysis\\MasterCSV\\All\_Glyco\\mgf\\ptm\\UC18ERLIC\_PTM\_35D.mgf

Click mouse within plot area to zoom in by factor of two about that point

Or, to Da

Label all possible matches Label matches used for scoring

Show Y-axis

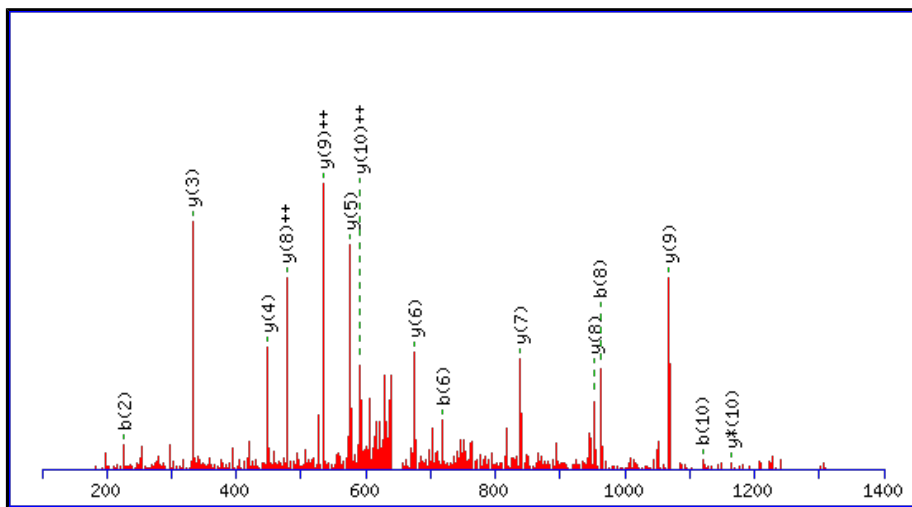

Monoisotopic mass of neutral peptide Mr(calc): 1293.6564

Fixed modifications: Carbamidomethyl (C) (apply to specified residues or termini only)

Variable modifications:

N3 : Deamidated (NQ)

N8 : Deamidated (NQ)

Ions Score: 50 Expect: 0.0021

Matches : 15/108 fragment ions using 22 most intense peaks ([help](#))

| #  | b                | b <sup>++</sup> | b*        | b <sup>+++</sup> | b <sup>0</sup> | b <sup>0++</sup> | Seq. | y                | y <sup>++</sup> | y*        | y <sup>+++</sup> | y <sup>0</sup> | y <sup>0++</sup> | #  |
|----|------------------|-----------------|-----------|------------------|----------------|------------------|------|------------------|-----------------|-----------|------------------|----------------|------------------|----|
| 1  | 114.0913         | 57.5493         |           |                  |                |                  | L    |                  |                 |           |                  |                |                  | 11 |
| 2  | <b>227.1754</b>  | 114.0913        |           |                  |                |                  | I    | 1181.5797        | 591.2935        | 1164.5531 | 582.7802         | 1163.5691      | 582.2882         | 10 |
| 3  | 342.2023         | 171.6048        | 325.1758  | 163.0915         |                |                  | N    | <b>1068.4956</b> | <b>534.7515</b> | 1051.4691 | 526.2382         | 1050.4851      | 525.7462         | 9  |
| 4  | 457.2293         | 229.1183        | 440.2027  | 220.6050         | 439.2187       | 220.1130         | D    | <b>953.4687</b>  | <b>477.2380</b> | 936.4421  | 468.7247         | 935.4581       | 468.2327         | 8  |
| 5  | 620.2926         | 310.6499        | 603.2661  | 302.1367         | 602.2821       | 301.6447         | Y    | <b>838.4417</b>  | 419.7245        | 821.4152  | 411.2112         | 820.4312       | 410.7192         | 7  |
| 6  | <b>719.3610</b>  | 360.1842        | 702.3345  | 351.6709         | 701.3505       | 351.1789         | V    | <b>675.3784</b>  | 338.1928        | 658.3519  | 329.6796         | 657.3678       | 329.1876         | 6  |
| 7  | 847.4560         | 424.2316        | 830.4294  | 415.7184         | 829.4454       | 415.2264         | K    | <b>576.3100</b>  | 288.6586        | 559.2835  | 280.1454         | 558.2994       | 279.6534         | 5  |
| 8  | <b>962.4829</b>  | 481.7451        | 945.4564  | 473.2318         | 944.4724       | 472.7398         | N    | <b>448.2150</b>  | 224.6112        | 431.1885  | 216.0979         | 430.2045       | 215.6059         | 4  |
| 9  | 1019.5044        | 510.2558        | 1002.4779 | 501.7426         | 1001.4938      | 501.2506         | G    | <b>333.1881</b>  | 167.0977        | 316.1615  | 158.5844         | 315.1775       | 158.0924         | 3  |
| 10 | <b>1120.5521</b> | 560.7797        | 1103.5255 | 552.2664         | 1102.5415      | 551.7744         | T    | 276.1666         | 138.5870        | 259.1401  | 130.0737         | 258.1561       | 129.5817         | 2  |
| 11 |                  |                 |           |                  |                |                  | R    | 175.1190         | 88.0631         | 158.0924  | 79.5498          |                |                  | 1  |

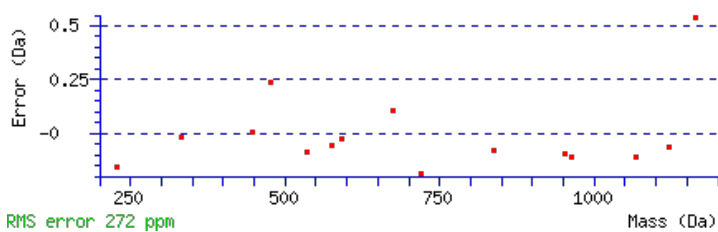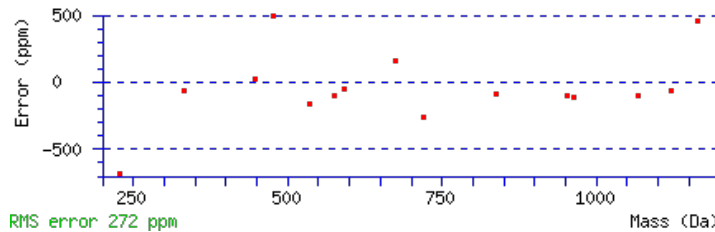

NCBI **BLAST** search of [LINDYVKNQTR](#)

(Parameters: blastp, nr protein database, expect=20000, no filter, PAM30)

Other BLAST [web gateways](#)

**All matches to this query**

| Score | Mr(calc)  | Delta   | Sequence                     |
|-------|-----------|---------|------------------------------|
| 50.1  | 1293.6564 | 0.0024  | <a href="#">LINDYVKNQTR</a>  |
| 7.0   | 1293.6564 | 0.0024  | <a href="#">LNSYIQGKNEK</a>  |
| 6.6   | 1293.6573 | 0.0015  | <a href="#">ILNMCQVIER</a>   |
| 5.7   | 1293.6573 | 0.0015  | <a href="#">EPAGKMVMLFR</a>  |
| 5.6   | 1293.6573 | 0.0015  | <a href="#">ILNMCQVIER</a>   |
| 4.3   | 1292.6580 | 1.0008  | <a href="#">AAMERQLISMK</a>  |
| 4.3   | 1293.6573 | 0.0015  | <a href="#">EPAGKMVMLFR</a>  |
| 3.5   | 1293.6564 | 0.0024  | <a href="#">ILAESVANSAYR</a> |
| 3.4   | 1293.6639 | -0.0050 | <a href="#">IISFGISDLQAM</a> |
| 2.9   | 1293.6605 | -0.0016 | <a href="#">EPLNLFYIER</a>   |

**Mascot:** <http://www.matrixscience.com/>

# MASCOT SCIENCE Mascot Search Results

## Peptide View

MS/MS Fragmentation of **FNLTETSEAEIHQSFQHLLR**

Found in **G3V5I3** in **con\_Xuniprot\_HUMAN3**, G3V5I3\_HUMAN Alpha-1-antichymotrypsin OS=Homo sapiens GN=SERPINA3 PE=3 SV=1

Match to Query 21492: 2400.179952 from(801.067260,3+) intensity(29116.8516) rtinseconds(2293) scans(5566) index(16972)

Title: 111019\_Est\_ML\_YP\_G\_06Spectrum4624\_scans\_\_5566

Data file C:\mascot\20140703\_Tmgf\_1D\CSV\_UseAnalysis\MasterCSV\All\_Glyco\mgf\ptm\UC18ERLIC\_PTM\_35D.mgf

Click mouse within plot area to zoom in by factor of two about that point

Or, to Da

Label all possible matches Label matches used for scoring

Show Y-axis

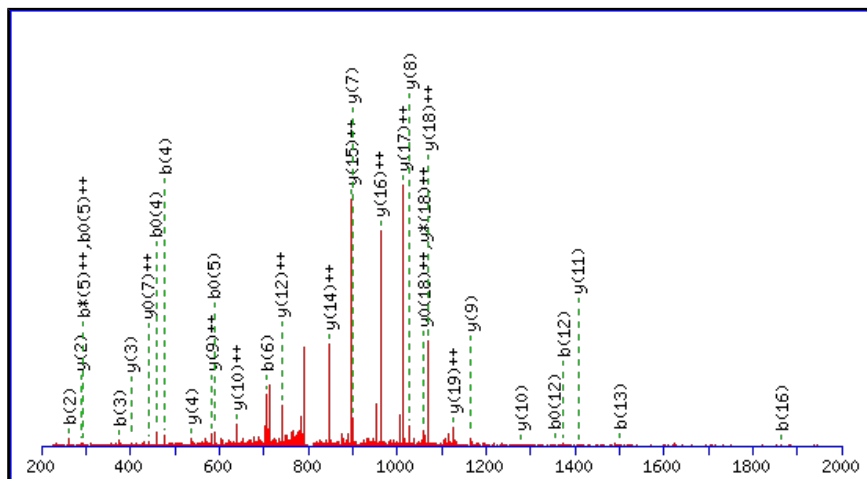

Monoisotopic mass of neutral peptide Mr(calc): 2400.1710

Fixed modifications: Carbamidomethyl (C) (apply to specified residues or termini only)

Variable modifications:

N2 : Deamidated (NQ)

Ions Score: 47 Expect: 0.0053

Matches : 32/208 fragment ions using 69 most intense peaks ([help](#))

| #  | b         | b <sup>++</sup> | b <sup>*</sup> | b <sup>*++</sup> | b <sup>0</sup> | b <sup>0++</sup> | Seq. | y         | y <sup>++</sup> | y <sup>*</sup> | y <sup>*++</sup> | y <sup>0</sup> | y <sup>0++</sup> | #  |
|----|-----------|-----------------|----------------|------------------|----------------|------------------|------|-----------|-----------------|----------------|------------------|----------------|------------------|----|
| 1  | 148.0757  | 74.5415         |                |                  |                |                  | F    |           |                 |                |                  |                |                  | 20 |
| 2  | 263.1026  | 132.0550        | 246.0761       | 123.5417         |                |                  | N    | 2254.1099 | 1127.5586       | 2237.0833      | 1119.0453        | 2236.0993      | 1118.5533        | 19 |
| 3  | 376.1867  | 188.5970        | 359.1601       | 180.0837         |                |                  | L    | 2139.0829 | 1070.0451       | 2122.0564      | 1061.5318        | 2121.0723      | 1061.0398        | 18 |
| 4  | 477.2344  | 239.1208        | 460.2078       | 230.6076         | 459.2238       | 230.1155         | T    | 2025.9988 | 1013.5031       | 2008.9723      | 1004.9898        | 2007.9883      | 1004.4978        | 17 |
| 5  | 606.2770  | 303.6421        | 589.2504       | 295.1288         | 588.2664       | 294.6368         | E    | 1924.9512 | 962.9792        | 1907.9246      | 954.4659         | 1906.9406      | 953.9739         | 16 |
| 6  | 707.3246  | 354.1660        | 690.2981       | 345.6527         | 689.3141       | 345.1607         | T    | 1795.9086 | 898.4579        | 1778.8820      | 889.9447         | 1777.8980      | 889.4526         | 15 |
| 7  | 794.3567  | 397.6820        | 777.3301       | 389.1687         | 776.3461       | 388.6767         | S    | 1694.8609 | 847.9341        | 1677.8343      | 839.4208         | 1676.8503      | 838.9288         | 14 |
| 8  | 923.3993  | 462.2033        | 906.3727       | 453.6900         | 905.3887       | 453.1980         | E    | 1607.8289 | 804.4181        | 1590.8023      | 795.9048         | 1589.8183      | 795.4128         | 13 |
| 9  | 994.4364  | 497.7218        | 977.4098       | 489.2086         | 976.4258       | 488.7165         | A    | 1478.7863 | 739.8968        | 1461.7597      | 731.3835         | 1460.7757      | 730.8915         | 12 |
| 10 | 1123.4790 | 562.2431        | 1106.4524      | 553.7299         | 1105.4684      | 553.2378         | E    | 1407.7492 | 704.3782        | 1390.7226      | 695.8649         | 1389.7386      | 695.3729         | 11 |
| 11 | 1236.5630 | 618.7852        | 1219.5365      | 610.2719         | 1218.5525      | 609.7799         | I    | 1278.7066 | 639.8569        | 1261.6800      | 631.3436         | 1260.6960      | 630.8516         | 10 |
| 12 | 1373.6220 | 687.3146        | 1356.5954      | 678.8013         | 1355.6114      | 678.3093         | H    | 1165.6225 | 583.3149        | 1148.5960      | 574.8016         | 1147.6119      | 574.3096         | 9  |
| 13 | 1501.6805 | 751.3439        | 1484.6540      | 742.8306         | 1483.6700      | 742.3386         | Q    | 1028.5636 | 514.7854        | 1011.5370      | 506.2722         | 1010.5530      | 505.7802         | 8  |
| 14 | 1588.7126 | 794.8599        | 1571.6860      | 786.3466         | 1570.7020      | 785.8546         | S    | 900.5050  | 450.7561        | 883.4785       | 442.2429         | 882.4944       | 441.7509         | 7  |
| 15 | 1735.7810 | 868.3941        | 1718.7544      | 859.8808         | 1717.7704      | 859.3888         | F    | 813.4730  | 407.2401        | 796.4464       | 398.7269         |                |                  | 6  |
| 16 | 1863.8395 | 932.4234        | 1846.8130      | 923.9101         | 1845.8290      | 923.4181         | Q    | 666.4046  | 333.7059        | 649.3780       | 325.1926         |                |                  | 5  |
| 17 | 2000.8985 | 1000.9529       | 1983.8719      | 992.4396         | 1982.8879      | 991.9476         | H    | 538.3460  | 269.6766        | 521.3194       | 261.1634         |                |                  | 4  |
| 18 | 2113.9825 | 1057.4949       | 2096.9560      | 1048.9816        | 2095.9720      | 1048.4896        | L    | 401.2871  | 201.1472        | 384.2605       | 192.6339         |                |                  | 3  |
| 19 | 2227.0666 | 1114.0369       | 2210.0400      | 1105.5237        | 2209.0560      | 1105.0317        | L    | 288.2030  | 144.6051        | 271.1765       | 136.0919         |                |                  | 2  |
| 20 |           |                 |                |                  |                |                  | R    | 175.1190  | 88.0631         | 158.0924       | 79.5498          |                |                  | 1  |

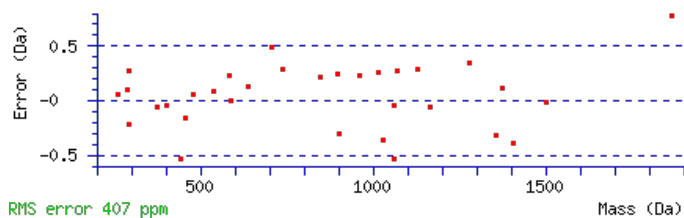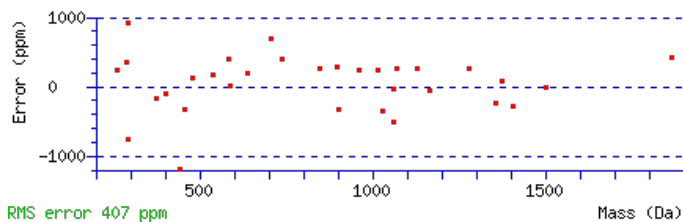

NCBI BLAST search of [FNL TETSEAEIHQS FQHLLR](#)

(Parameters: blastp, nr protein database, expect=20000, no filter, PAM30)

Other BLAST [web gateways](#)

**All matches to this query**

| Score | Mr(calc)  | Delta   | Sequence                               | Site Analysis        |
|-------|-----------|---------|----------------------------------------|----------------------|
| 47.1  | 2400.1710 | 0.0090  | <a href="#">FNL TETSEAEIHQS FQHLLR</a> | Deamidated N2 97.45% |
| 33.8  | 2399.1870 | 0.9930  | <a href="#">FNL TETSEAEIHQS FQHLLR</a> |                      |
| 30.3  | 2400.1710 | 0.0090  | <a href="#">FNL TETSEAEIHQS FQHLLR</a> | Deamidated Q13 2.04% |
| 24.3  | 2400.1710 | 0.0090  | <a href="#">FNL TETSEAEIHQS FQHLLR</a> | Deamidated Q16 0.51% |
| 22.6  | 2399.1712 | 1.0087  | <a href="#">MNL VVIPDSLQTTAMPQTLHR</a> |                      |
| 9.9   | 2399.1719 | 1.0081  | <a href="#">NFL DLPSECEEPALKKEFSK</a>  |                      |
| 8.6   | 2400.1921 | -0.0121 | <a href="#">AFQEQGGGSKEKEAKPPQEDLK</a> |                      |
| 8.4   | 2400.1817 | -0.0018 | <a href="#">PTMTWLQTLTGLLEQM QVHR</a>  |                      |
| 8.2   | 2400.1817 | -0.0018 | <a href="#">PTMTWLQTLTGLLEQM QVHR</a>  |                      |
| 7.7   | 2400.1759 | 0.0041  | <a href="#">MVDPRWPATFNFYICIVQK</a>    |                      |

Mascot: <http://www.matrixscience.com/>

# MASCOT SCIENCE Mascot Search Results

## Peptide View

MS/MS Fragmentation of **GTGNDTVLNVALLNVISNQECNIK**

Found in **G3XAK1** in **con\_Xuniprot\_HUMAN3**, G3XAK1\_HUMAN Hepatocyte growth factor-like protein alpha chain OS=Homo sapiens  
GN=MST1 PE=3 SV=1

Match to Query 22180: 2586.307108 from(1294.160830,2+) intensity(18587.8223) rtinseconds(2452) scans(6512) index(4647)

Title: 111019\_Est\_ISCardio\_NMI\_YP\_G\_7Spectrum5557\_scans\_6512

Data file C:\mascot\20140703\_Tmgf\_1D\CSV\_UseAnalysis\MasterCSV\All\_Glyco\mgf\ptm\UC18ERLIC\_PTM\_35D.mgf

Click mouse within plot area to zoom in by factor of two about that point

Or, to Da

Label all possible matches Label matches used for scoring

Show Y-axis

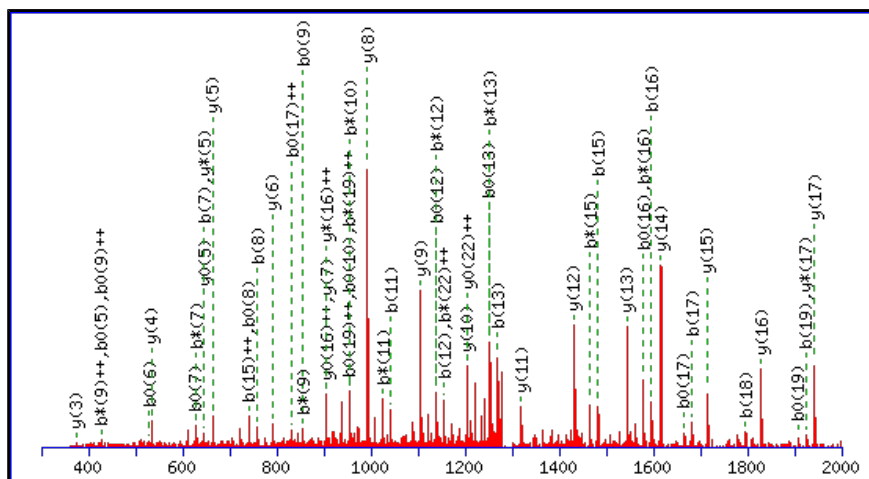

Monoisotopic mass of neutral peptide Mr(calc): 2586.2959

Fixed modifications: Carbamidomethyl (C) (apply to specified residues or termini only)

Variable modifications:

N4 : Deamidated (NQ)

Ions Score: 86 Expect: 6.8e-007

Matches : 57/260 fragment ions using 85 most intense peaks ([help](#))

| #  | b         | b <sup>++</sup> | b <sup>*</sup> | b <sup>***</sup> | b <sup>0</sup> | b <sup>0++</sup> | Seq. | y         | y <sup>++</sup> | y <sup>*</sup> | y <sup>***</sup> | y <sup>0</sup> | y <sup>0++</sup> | #  |
|----|-----------|-----------------|----------------|------------------|----------------|------------------|------|-----------|-----------------|----------------|------------------|----------------|------------------|----|
| 1  | 58.0287   | 29.5180         |                |                  |                |                  | G    |           |                 |                |                  |                |                  | 24 |
| 2  | 159.0764  | 80.0418         |                |                  | 141.0659       | 71.0366          | T    | 2530.2817 | 1265.6445       | 2513.2552      | 1257.1312        | 2512.2712      | 1256.6392        | 23 |
| 3  | 216.0979  | 108.5526        |                |                  | 198.0873       | 99.5473          | G    | 2429.2341 | 1215.1207       | 2412.2075      | 1206.6074        | 2411.2235      | 1206.1154        | 22 |
| 4  | 331.1248  | 166.0661        | 314.0983       | 157.5528         | 313.1143       | 157.0608         | N    | 2372.2126 | 1186.6099       | 2355.1861      | 1178.0967        | 2354.2020      | 1177.6047        | 21 |
| 5  | 446.1518  | 223.5795        | 429.1252       | 215.0662         | 428.1412       | 214.5742         | D    | 2257.1857 | 1129.0965       | 2240.1591      | 1120.5832        | 2239.1751      | 1120.0912        | 20 |
| 6  | 547.1994  | 274.1034        | 530.1729       | 265.5901         | 529.1889       | 265.0981         | T    | 2142.1587 | 1071.5830       | 2125.1322      | 1063.0697        | 2124.1481      | 1062.5777        | 19 |
| 7  | 646.2679  | 323.6376        | 629.2413       | 315.1243         | 628.2573       | 314.6323         | V    | 2041.1110 | 1021.0592       | 2024.0845      | 1012.5459        | 2023.1005      | 1012.0539        | 18 |
| 8  | 759.3519  | 380.1796        | 742.3254       | 371.6663         | 741.3414       | 371.1743         | L    | 1942.0426 | 971.5249        | 1925.0161      | 963.0117         | 1924.0321      | 962.5197         | 17 |
| 9  | 873.3949  | 437.2011        | 856.3683       | 428.6878         | 855.3843       | 428.1958         | N    | 1828.9586 | 914.9829        | 1811.9320      | 906.4696         | 1810.9480      | 905.9776         | 16 |
| 10 | 972.4633  | 486.7353        | 955.4367       | 478.2220         | 954.4527       | 477.7300         | V    | 1714.9156 | 857.9615        | 1697.8891      | 849.4482         | 1696.9051      | 848.9562         | 15 |
| 11 | 1043.5004 | 522.2538        | 1026.4738      | 513.7406         | 1025.4898      | 513.2485         | A    | 1615.8472 | 808.4272        | 1598.8207      | 799.9140         | 1597.8367      | 799.4220         | 14 |
| 12 | 1156.5844 | 578.7959        | 1139.5579      | 570.2826         | 1138.5739      | 569.7906         | L    | 1544.8101 | 772.9087        | 1527.7836      | 764.3954         | 1526.7995      | 763.9034         | 13 |
| 13 | 1269.6685 | 635.3379        | 1252.6420      | 626.8246         | 1251.6579      | 626.3326         | L    | 1431.7260 | 716.3667        | 1414.6995      | 707.8534         | 1413.7155      | 707.3614         | 12 |
| 14 | 1383.7114 | 692.3594        | 1366.6849      | 683.8461         | 1365.7009      | 683.3541         | N    | 1318.6420 | 659.8246        | 1301.6154      | 651.3114         | 1300.6314      | 650.8193         | 11 |
| 15 | 1482.7798 | 741.8936        | 1465.7533      | 733.3803         | 1464.7693      | 732.8883         | V    | 1204.5990 | 602.8032        | 1187.5725      | 594.2899         | 1186.5885      | 593.7979         | 10 |
| 16 | 1595.8639 | 798.4356        | 1578.8374      | 789.9223         | 1577.8533      | 789.4303         | I    | 1105.5306 | 553.2690        | 1088.5041      | 544.7557         | 1087.5201      | 544.2637         | 9  |
| 17 | 1682.8959 | 841.9516        | 1665.8694      | 833.4383         | 1664.8854      | 832.9463         | S    | 992.4466  | 496.7269        | 975.4200       | 488.2136         | 974.4360       | 487.7216         | 8  |
| 18 | 1796.9389 | 898.9731        | 1779.9123      | 890.4598         | 1778.9283      | 889.9678         | N    | 905.4145  | 453.2109        | 888.3880       | 444.6976         | 887.4040       | 444.2056         | 7  |
| 19 | 1924.9974 | 963.0024        | 1907.9709      | 954.4891         | 1906.9869      | 953.9971         | Q    | 791.3716  | 396.1894        | 774.3451       | 387.6762         | 773.3611       | 387.1842         | 6  |
| 20 | 2054.0400 | 1027.5237       | 2037.0135      | 1019.0104        | 2036.0295      | 1018.5184        | E    | 663.3130  | 332.1602        | 646.2865       | 323.6469         | 645.3025       | 323.1549         | 5  |
| 21 | 2214.0707 | 1107.5390       | 2197.0441      | 1099.0257        | 2196.0601      | 1098.5337        | C    | 534.2704  | 267.6389        | 517.2439       | 259.1256         |                |                  | 4  |
| 22 | 2328.1136 | 1164.5604       | 2311.0871      | 1156.0472        | 2310.1031      | 1155.5552        | N    | 374.2398  | 187.6235        | 357.2132       | 179.1103         |                |                  | 3  |

|    |           |           |           |           |           |           |   |          |          |          |          |  |  |   |
|----|-----------|-----------|-----------|-----------|-----------|-----------|---|----------|----------|----------|----------|--|--|---|
| 23 | 2441.1977 | 1221.1025 | 2424.1711 | 1212.5892 | 2423.1871 | 1212.0972 | I | 260.1969 | 130.6021 | 243.1703 | 122.0888 |  |  | 2 |
| 24 |           |           |           |           |           |           | K | 147.1128 | 74.0600  | 130.0863 | 65.5468  |  |  | 1 |

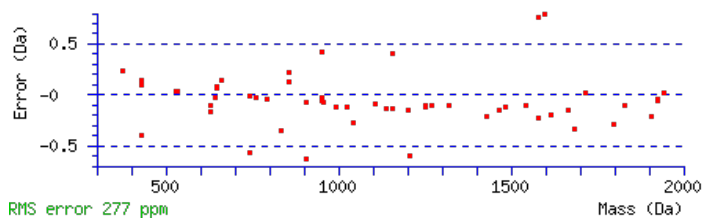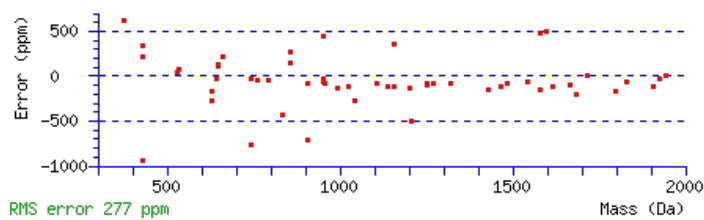

NCBI BLAST search of [GTGNDTVLNVALLNVISNQECNIK](#)  
 (Parameters: blastp, nr protein database, expect=20000, no filter, PAM30)  
 Other BLAST [web gateways](#)

All matches to this query

| Score | Mr(calc)  | Delta  | Sequence                                 | Site Analysis        |
|-------|-----------|--------|------------------------------------------|----------------------|
| 85.7  | 2586.2959 | 0.0112 | <a href="#">GTGNDTVLNVALLNVISNQECNIK</a> | Deamidated N4 63.98% |
| 83.2  | 2586.2959 | 0.0112 | <a href="#">GTGNDTVLNVALLNVISNQECNIK</a> | Deamidated N9 35.57% |
| 67.2  | 2585.3119 | 0.9952 | <a href="#">GTGNDTVLNVALLNVISNQECNIK</a> |                      |
| 63.3  | 2586.2959 | 0.0112 | <a href="#">GTGNDTVLNVALLNVISNQECNIK</a> | Deamidated N14 0.37% |
| 56.3  | 2586.2959 | 0.0112 | <a href="#">GTGNDTVLNVALLNVISNQECNIK</a> | Deamidated N18 0.07% |
| 46.2  | 2586.2959 | 0.0112 | <a href="#">GTGNDTVLNVALLNVISNQECNIK</a> | Deamidated N22 0.01% |
| 46.1  | 2586.2959 | 0.0112 | <a href="#">GTGNDTVLNVALLNVISNQECNIK</a> | Deamidated Q19 0.01% |
| 7.2   | 2584.2941 | 2.0130 | <a href="#">DQADPLDMKNVALLAPKTQLEEK</a>  |                      |
| 7.1   | 2586.3013 | 0.0058 | <a href="#">HLLQAPVDDAQEILHSRFPMPR</a>   |                      |
| 3.0   | 2586.3013 | 0.0058 | <a href="#">HLLQAPVDDAQEILHSRFPMPR</a>   |                      |

Mascot: <http://www.matrixscience.com/>



# MASCOT SCIENCE Mascot Search Results

## Peptide View

MS/MS Fragmentation of **GKGEYRGTANTTTAGVPCQR**

Found in **G3XAK1** in **con\_Xuniprot\_HUMAN3**, G3XAK1\_HUMAN Hepatocyte growth factor-like protein alpha chain OS=Homo sapiens  
GN=MST1 PE=3 SV=1

Match to Query 14730: 2181.029142 from(728.016990,3+) intensity(21610.6465) rtinseconds(315) scans(449) index(8178)

Title: 111019\_Est\_ISCardio\_NMI\_YS\_G\_3Spectrum342\_scans\_\_449

Data file C:\mascot\20140703\_Tmgf\_1D\CSV\_UseAnalysis\MasterCSV\All\_Glyco\mgf\ptm\UC18ERLIC\_PTM\_35D.mgf

Click mouse within plot area to zoom in by factor of two about that point

Or, to Da

Label all possible matches Label matches used for scoring

Show Y-axis

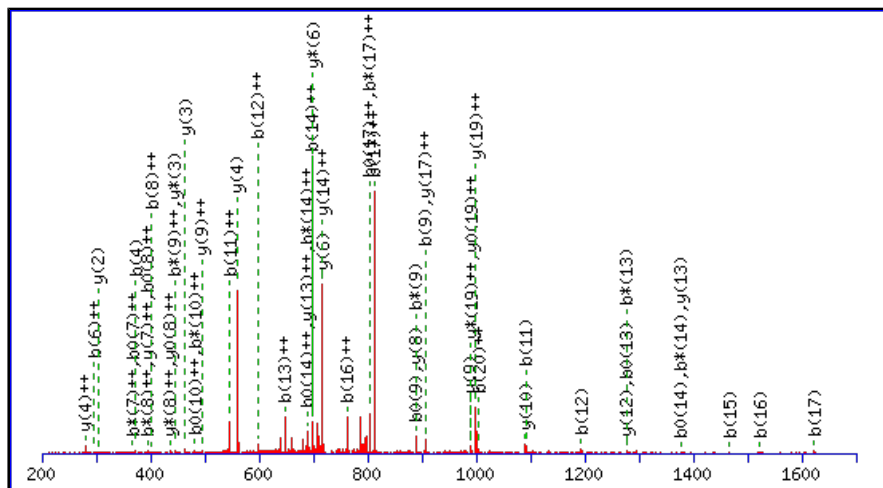

Monoisotopic mass of neutral peptide Mr(calc): 2181.0233

Fixed modifications: Carbamidomethyl (C) (apply to specified residues or termini only)

Variable modifications:

N11 : Deamidated (NQ)

Ions Score: 57 Expect: 0.00048

Matches : 55/218 fragment ions using 74 most intense peaks ([help](#))

| #  | b                | b <sup>++</sup>  | b <sup>*</sup>   | b <sup>*++</sup> | b <sup>0</sup>   | b <sup>0++</sup> | Seq. | y                | y <sup>++</sup> | y <sup>*</sup>  | y <sup>*++</sup> | y <sup>0</sup> | y <sup>0++</sup> | #  |
|----|------------------|------------------|------------------|------------------|------------------|------------------|------|------------------|-----------------|-----------------|------------------|----------------|------------------|----|
| 1  | 58.0287          | 29.5180          |                  |                  |                  |                  | G    |                  |                 |                 |                  |                |                  | 21 |
| 2  | 186.1237         | 93.5655          | 169.0972         | 85.0522          |                  |                  | K    | 2125.0091        | 1063.0082       | 2107.9825       | 1054.4949        | 2106.9985      | 1054.0029        | 20 |
| 3  | 243.1452         | 122.0762         | 226.1186         | 113.5629         |                  |                  | G    | 1996.9141        | 998.9607        | 1979.8876       | 990.4474         | 1978.9036      | 989.9554         | 19 |
| 4  | <b>372.1878</b>  | 186.5975         | 355.1612         | 178.0842         | 354.1772         | 177.5922         | E    | 1939.8927        | 970.4500        | 1922.8661       | 961.9367         | 1921.8821      | 961.4447         | 18 |
| 5  | 429.2092         | 215.1083         | 412.1827         | 206.5950         | 411.1987         | 206.1030         | G    | 1810.8501        | 905.9287        | 1793.8235       | 897.4154         | 1792.8395      | 896.9234         | 17 |
| 6  | 592.2726         | <b>296.6399</b>  | 575.2460         | 288.1266         | 574.2620         | 287.6346         | Y    | 1753.8286        | 877.4179        | 1736.8021       | 868.9047         | 1735.8180      | 868.4127         | 16 |
| 7  | 748.3737         | 374.6905         | 731.3471         | <b>366.1772</b>  | 730.3631         | <b>365.6852</b>  | R    | 1590.7653        | 795.8863        | 1573.7387       | 787.3730         | 1572.7547      | 786.8810         | 15 |
| 8  | 805.3951         | <b>403.2012</b>  | 788.3686         | <b>394.6879</b>  | 787.3846         | <b>394.1959</b>  | G    | 1434.6642        | <b>717.8357</b> | 1417.6376       | 709.3224         | 1416.6536      | 708.8304         | 14 |
| 9  | <b>906.4428</b>  | 453.7250         | <b>889.4163</b>  | <b>445.2118</b>  | <b>888.4322</b>  | 444.7198         | T    | <b>1377.6427</b> | <b>689.3250</b> | 1360.6162       | 680.8117         | 1359.6321      | 680.3197         | 13 |
| 10 | 977.4799         | 489.2436         | 960.4534         | <b>480.7303</b>  | 959.4694         | <b>480.2383</b>  | A    | <b>1276.5950</b> | 638.8012        | 1259.5685       | 630.2879         | 1258.5845      | 629.7959         | 12 |
| 11 | <b>1092.5069</b> | <b>546.7571</b>  | 1075.4803        | 538.2438         | 1074.4963        | 537.7518         | N    | 1205.5579        | 603.2826        | 1188.5314       | 594.7693         | 1187.5474      | 594.2773         | 11 |
| 12 | <b>1193.5545</b> | <b>597.2809</b>  | 1176.5280        | 588.7676         | 1175.5440        | 588.2756         | T    | <b>1090.5310</b> | 545.7691        | 1073.5044       | 537.2558         | 1072.5204      | 536.7638         | 10 |
| 13 | 1294.6022        | <b>647.8047</b>  | <b>1277.5757</b> | 639.2915         | <b>1276.5917</b> | 638.7995         | T    | <b>989.4833</b>  | <b>495.2453</b> | 972.4567        | 486.7320         | 971.4727       | 486.2400         | 9  |
| 14 | 1395.6499        | <b>698.3286</b>  | <b>1378.6234</b> | <b>689.8153</b>  | <b>1377.6393</b> | <b>689.3233</b>  | T    | <b>888.4356</b>  | 444.7214        | 871.4091        | <b>436.2082</b>  | 870.4250       | <b>435.7162</b>  | 8  |
| 15 | <b>1466.6870</b> | 733.8471         | 1449.6605        | 725.3339         | 1448.6765        | 724.8419         | A    | 787.3879         | <b>394.1976</b> | 770.3614        | 385.6843         |                |                  | 7  |
| 16 | <b>1523.7085</b> | <b>762.3579</b>  | 1506.6819        | 753.8446         | 1505.6979        | 753.3526         | G    | <b>716.3508</b>  | 358.6790        | <b>699.3243</b> | 350.1658         |                |                  | 6  |
| 17 | <b>1622.7769</b> | <b>811.8921</b>  | 1605.7503        | <b>803.3788</b>  | 1604.7663        | <b>802.8868</b>  | V    | 659.3294         | 330.1683        | 642.3028        | 321.6550         |                |                  | 5  |
| 18 | 1719.8297        | 860.4185         | 1702.8031        | 851.9052         | 1701.8191        | 851.4132         | P    | <b>560.2609</b>  | <b>280.6341</b> | 543.2344        | 272.1208         |                |                  | 4  |
| 19 | 1879.8603        | 940.4338         | 1862.8338        | 931.9205         | 1861.8497        | 931.4285         | C    | <b>463.2082</b>  | 232.1077        | <b>446.1816</b> | 223.5945         |                |                  | 3  |
| 20 | 2007.9189        | <b>1004.4631</b> | 1990.8923        | 995.9498         | 1989.9083        | 995.4578         | Q    | <b>303.1775</b>  | 152.0924        | 286.1510        | 143.5791         |                |                  | 2  |
| 21 |                  |                  |                  |                  |                  |                  | R    | 175.1190         | 88.0631         | 158.0924        | 79.5498          |                |                  | 1  |

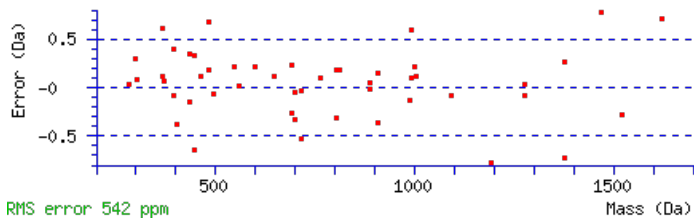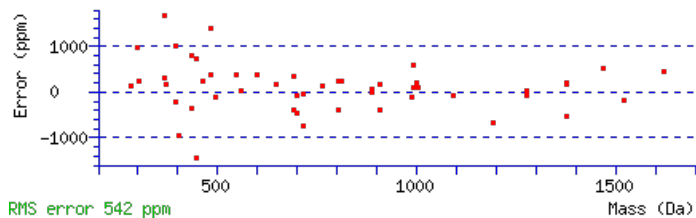

NCBI **BLAST** search of [GKGEGYRGTANTTTAGVPCQR](#)  
 (Parameters: blastp, nr protein database, expect=20000, no filter, PAM30)  
 Other BLAST [web gateways](#)

**All matches to this query**

| Score | Mr(calc)  | Delta  | Sequence                              | Site Analysis         |
|-------|-----------|--------|---------------------------------------|-----------------------|
| 56.9  | 2181.0233 | 0.0059 | <a href="#">GKGEGYRGTANTTTAGVPCQR</a> | Deamidated N11 96.09% |
| 43.0  | 2181.0233 | 0.0059 | <a href="#">GKGEGYRGTANTTTAGVPCQR</a> | Deamidated Q20 3.91%  |
| 5.3   | 2180.0206 | 1.0086 | <a href="#">EQLANSQANRVPHSSEAGAGR</a> |                       |
| 5.2   | 2181.0233 | 0.0059 | <a href="#">CLOTGTSGRERSTSGEWLR</a>   |                       |
| 5.0   | 2179.0137 | 2.0155 | <a href="#">IKEGEADSGMALDQEVSCLK</a>  |                       |
| 4.9   | 2180.0154 | 1.0137 | <a href="#">DSGNNILAEDLLSTSEKTC</a>   |                       |
| 4.9   | 2180.0154 | 1.0137 | <a href="#">DSGNNILAEDLLSTSEKTC</a>   |                       |
| 4.4   | 2181.0259 | 0.0032 | <a href="#">TDNDLDLMPSHLGPNGKLDK</a>  |                       |
| 3.9   | 2180.0320 | 0.9971 | <a href="#">DFAEMSSQLHLTPFTARGR</a>   |                       |
| 3.7   | 2180.0206 | 1.0086 | <a href="#">EQLANSQANRVPHSSEAGAGR</a> |                       |

Mascot: <http://www.matrixscience.com/>

# MATRIX SCIENCE Mascot Search Results

## Peptide View

MS/MS Fragmentation of **GEGYRGTANTTTAGVPCQR**

Found in **G3XAK1** in **con\_Xuniprot\_HUMAN3**, G3XAK1\_HUMAN Hepatocyte growth factor-like protein alpha chain OS=Homo sapiens GN=MST1 PE=3 SV=1

Match to Query 12212: 1995.911262 from(666.311030,3+) intensity(12724.2510) rtinseconds(367) scans(634) index(15572)

Title: 111019\_Est\_MI\_YP\_G\_05Spectrum512\_scans\_634

Data file C:\\mascot\\20140703\_Tmgf\_1D\\CSV\_UseAnalysis\\MasterCSV\\All\_Glyco\\mgf\\ptm\\UC18ERLIC\_PTM\_35D.mgf

Click mouse within plot area to zoom in by factor of two about that point

Or, to Da

Label all possible matches Label matches used for scoring

Show Y-axis

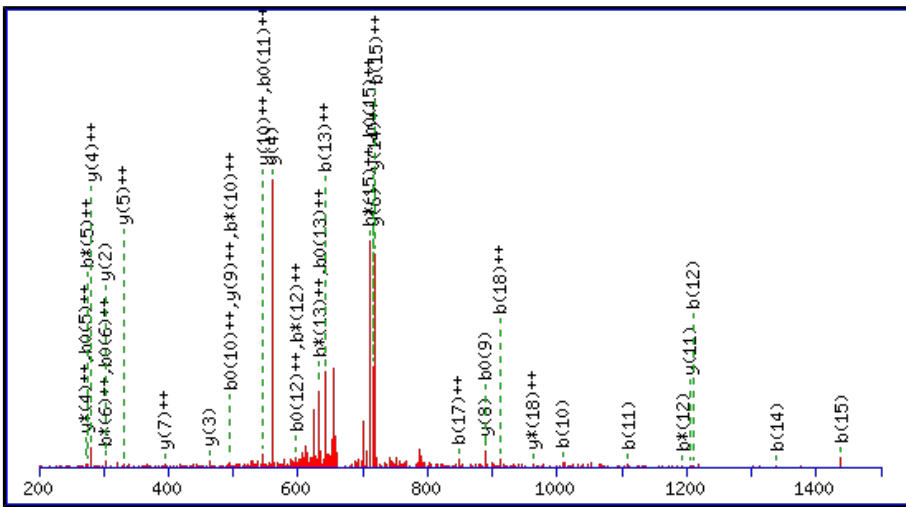

Monoisotopic mass of neutral peptide Mr(calc): 1995.9069

Fixed modifications: Carbamidomethyl (C) (apply to specified residues or termini only)

Variable modifications:

N9 : Deamidated (NQ)

Ions Score: 37 Expect: 0.035

Matches : 40/192 fragment ions using 60 most intense peaks ([help](#))

| #  | b         | b <sup>++</sup> | b <sup>*</sup> | b <sup>*++</sup> | b <sup>0</sup> | b <sup>0++</sup> | Seq.     | y         | y <sup>++</sup> | y <sup>*</sup> | y <sup>*++</sup> | y <sup>0</sup> | y <sup>0++</sup> | #  |
|----|-----------|-----------------|----------------|------------------|----------------|------------------|----------|-----------|-----------------|----------------|------------------|----------------|------------------|----|
| 1  | 58.0287   | 29.5180         |                |                  |                |                  | <b>G</b> |           |                 |                |                  |                |                  | 19 |
| 2  | 187.0713  | 94.0393         |                |                  | 169.0608       | 85.0340          | <b>E</b> | 1939.8927 | 970.4500        | 1922.8661      | 961.9367         | 1921.8821      | 961.4447         | 18 |
| 3  | 244.0928  | 122.5500        |                |                  | 226.0822       | 113.5448         | <b>G</b> | 1810.8501 | 905.9287        | 1793.8235      | 897.4154         | 1792.8395      | 896.9234         | 17 |
| 4  | 407.1561  | 204.0817        |                |                  | 389.1456       | 195.0764         | <b>Y</b> | 1753.8286 | 877.4179        | 1736.8021      | 868.9047         | 1735.8180      | 868.4127         | 16 |
| 5  | 563.2572  | 282.1323        | 546.2307       | 273.6190         | 545.2467       | 273.1270         | <b>R</b> | 1590.7653 | 795.8863        | 1573.7387      | 787.3730         | 1572.7547      | 786.8810         | 15 |
| 6  | 620.2787  | 310.6430        | 603.2522       | 302.1297         | 602.2681       | 301.6377         | <b>G</b> | 1434.6642 | 717.8357        | 1417.6376      | 709.3224         | 1416.6536      | 708.8304         | 14 |
| 7  | 721.3264  | 361.1668        | 704.2998       | 352.6536         | 703.3158       | 352.1615         | <b>T</b> | 1377.6427 | 689.3250        | 1360.6162      | 680.8117         | 1359.6321      | 680.3197         | 13 |
| 8  | 792.3635  | 396.6854        | 775.3369       | 388.1721         | 774.3529       | 387.6801         | <b>A</b> | 1276.5950 | 638.8012        | 1259.5685      | 630.2879         | 1258.5845      | 629.7959         | 12 |
| 9  | 907.3904  | 454.1989        | 890.3639       | 445.6856         | 889.3799       | 445.1936         | <b>N</b> | 1205.5579 | 603.2826        | 1188.5314      | 594.7693         | 1187.5474      | 594.2773         | 11 |
| 10 | 1008.4381 | 504.7227        | 991.4116       | 496.2094         | 990.4276       | 495.7174         | <b>T</b> | 1090.5310 | 545.7691        | 1073.5044      | 537.2558         | 1072.5204      | 536.7638         | 10 |
| 11 | 1109.4858 | 555.2465        | 1092.4592      | 546.7333         | 1091.4752      | 546.2413         | <b>T</b> | 989.4833  | 495.2453        | 972.4567       | 486.7320         | 971.4727       | 486.2400         | 9  |
| 12 | 1210.5335 | 605.7704        | 1193.5069      | 597.2571         | 1192.5229      | 596.7651         | <b>T</b> | 888.4356  | 444.7214        | 871.4091       | 436.2082         | 870.4250       | 435.7162         | 8  |
| 13 | 1281.5706 | 641.2889        | 1264.5440      | 632.7757         | 1263.5600      | 632.2836         | <b>A</b> | 787.3879  | 394.1976        | 770.3614       | 385.6843         |                |                  | 7  |
| 14 | 1338.5921 | 669.7997        | 1321.5655      | 661.2864         | 1320.5815      | 660.7944         | <b>G</b> | 716.3508  | 358.6790        | 699.3243       | 350.1658         |                |                  | 6  |
| 15 | 1437.6605 | 719.3339        | 1420.6339      | 710.8206         | 1419.6499      | 710.3286         | <b>V</b> | 659.3294  | 330.1683        | 642.3028       | 321.6550         |                |                  | 5  |
| 16 | 1534.7132 | 767.8603        | 1517.6867      | 759.3470         | 1516.7027      | 758.8550         | <b>P</b> | 560.2609  | 280.6341        | 543.2344       | 272.1208         |                |                  | 4  |
| 17 | 1694.7439 | 847.8756        | 1677.7173      | 839.3623         | 1676.7333      | 838.8703         | <b>C</b> | 463.2082  | 232.1077        | 446.1816       | 223.5945         |                |                  | 3  |
| 18 | 1822.8025 | 911.9049        | 1805.7759      | 903.3916         | 1804.7919      | 902.8996         | <b>Q</b> | 303.1775  | 152.0924        | 286.1510       | 143.5791         |                |                  | 2  |
| 19 |           |                 |                |                  |                |                  | <b>R</b> | 175.1190  | 88.0631         | 158.0924       | 79.5498          |                |                  | 1  |

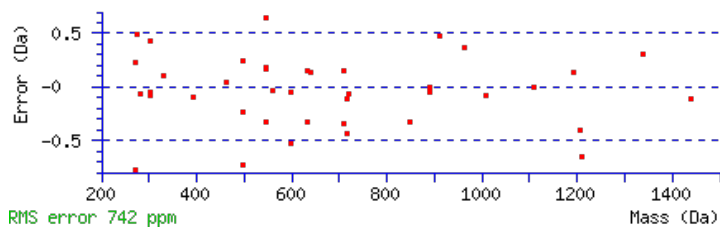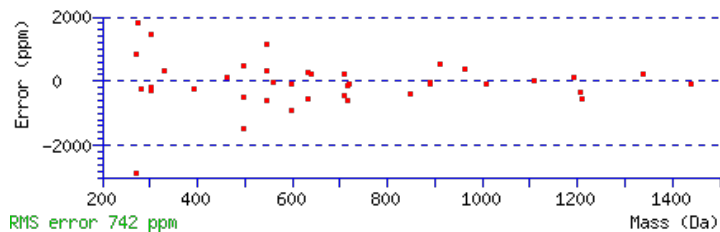

NCBI BLAST search of [GEGYRGTANTTTAGVPCQR](#)  
 (Parameters: blastp, nr protein database, expect=20000, no filter, PAM30)  
 Other BLAST [web gateways](#)

**All matches to this query**

| Score | Mr(calc)  | Delta   | Sequence                            | Site Analysis        |
|-------|-----------|---------|-------------------------------------|----------------------|
| 36.9  | 1995.9069 | 0.0044  | <a href="#">GEGYRGTANTTTAGVPCQR</a> | Deamidated N9 99.67% |
| 17.7  | 1995.9133 | -0.0021 | <a href="#">GSAIETSDQYQKQEQQR</a>   |                      |
| 16.3  | 1995.9133 | -0.0021 | <a href="#">GSAIETSDQYQKQEQQR</a>   |                      |
| 15.5  | 1995.9043 | 0.0069  | <a href="#">NGQMFEWINCROGSLR</a>    |                      |
| 15.1  | 1995.9133 | -0.0021 | <a href="#">GSAIETSDQYQKQEQQR</a>   |                      |
| 12.8  | 1995.9043 | 0.0069  | <a href="#">NGQMFEWINCROGSLR</a>    |                      |
| 12.0  | 1995.9069 | 0.0044  | <a href="#">GEGYRGTANTTTAGVPCQR</a> | Deamidated Q18 0.33% |
| 11.9  | 1995.9043 | 0.0069  | <a href="#">NGQMFEWINCROGSLR</a>    |                      |
| 11.9  | 1995.9043 | 0.0069  | <a href="#">NGQMFEWINCROGSLR</a>    |                      |
| 11.4  | 1995.9133 | -0.0021 | <a href="#">GSAIETSDQYQKQEQQR</a>   |                      |

Mascot: <http://www.matrixscience.com/>

# MATRIX SCIENCE Mascot Search Results

## Peptide View

MS/MS Fragmentation of **LISNCSKIFYGNR**

Found in **E7ETH0** in **con\_Xuniprot\_HUMAN3**, E7ETH0\_HUMAN Complement factor I light chain OS=Homo sapiens GN=CFI PE=2 SV=1

Match to Query 4230: 1458.697448 from(730.356000,2+) intensity(19167.0586) rtinseconds(479) scans(1047) index(24355)

Title: 111019\_Est\_MI\_YS\_G\_06Spectrum897\_scans\_\_1047

Data file C:\mascot\20140703\_Tmgf\_1D\CSV\_UseAnalysis\MasterCSV\All\_Glyco\mgf\ptm\UC18ERLIC\_PTM\_35D.mgf

Click mouse within plot area to zoom in by factor of two about that point

Or, to Da

Label all possible matches Label matches used for scoring

Show Y-axis

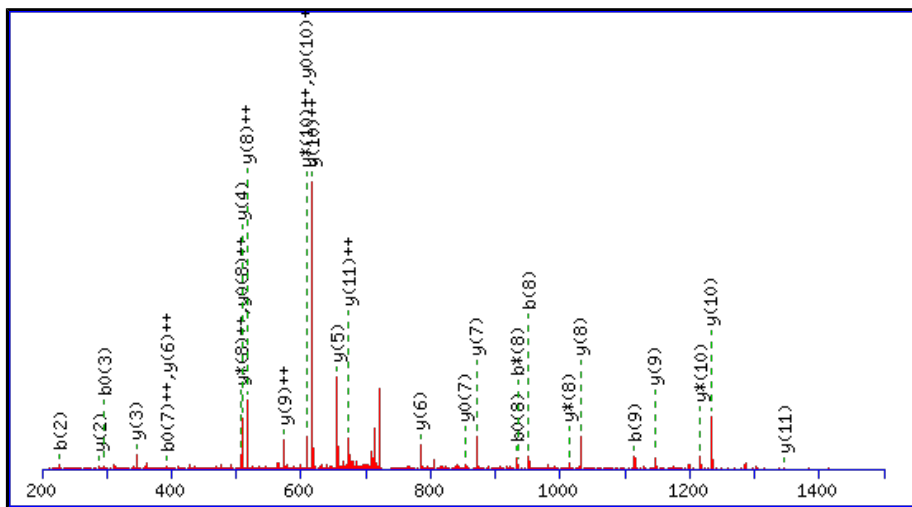

Monoisotopic mass of neutral peptide  $M_r(\text{calc})$ : 1458.6925

Fixed modifications: Carbamidomethyl (C) (apply to specified residues or termini only)

Variable modifications:

N4 : Deamidated (NQ)

Ions Score: 69 Expect: 2.1e-005

Matches : 29/110 fragment ions using 49 most intense peaks ([help](#))

| #  | b                | b <sup>++</sup> | b*              | b <sup>+++</sup> | b <sup>0</sup>  | b <sup>0++</sup> | Seq. | y                | y <sup>++</sup> | y*               | y <sup>+++</sup> | y <sup>0</sup>  | y <sup>0++</sup> | #  |
|----|------------------|-----------------|-----------------|------------------|-----------------|------------------|------|------------------|-----------------|------------------|------------------|-----------------|------------------|----|
| 1  | 114.0913         | 57.5493         |                 |                  |                 |                  | L    |                  |                 |                  |                  |                 |                  | 12 |
| 2  | <b>227.1754</b>  | 114.0913        |                 |                  |                 |                  | I    | <b>1346.6158</b> | <b>673.8115</b> | 1329.5892        | 665.2982         | 1328.6052       | 664.8062         | 11 |
| 3  | 314.2074         | 157.6074        |                 |                  | 296.1969        | 148.6021         | S    | <b>1233.5317</b> | <b>617.2695</b> | <b>1216.5051</b> | <b>608.7562</b>  | 1215.5211       | <b>608.2642</b>  | 10 |
| 4  | 429.2344         | 215.1208        | 412.2078        | 206.6076         | 411.2238        | 206.1155         | N    | <b>1146.4997</b> | <b>573.7535</b> | 1129.4731        | 565.2402         | 1128.4891       | 564.7482         | 9  |
| 5  | 589.2650         | 295.1362        | 572.2385        | 286.6229         | 571.2545        | 286.1309         | C    | <b>1031.4727</b> | <b>516.2400</b> | <b>1014.4462</b> | <b>507.7267</b>  | 1013.4622       | <b>507.2347</b>  | 8  |
| 6  | 676.2971         | 338.6522        | 659.2705        | 330.1389         | 658.2865        | 329.6469         | S    | <b>871.4421</b>  | 436.2247        | 854.4155         | 427.7114         | <b>853.4315</b> | 427.2194         | 7  |
| 7  | 804.3920         | 402.6996        | 787.3655        | 394.1864         | 786.3814        | <b>393.6944</b>  | K    | <b>784.4100</b>  | <b>392.7087</b> | 767.3835         | 384.1954         |                 |                  | 6  |
| 8  | <b>951.4604</b>  | 476.2339        | <b>934.4339</b> | 467.7206         | <b>933.4499</b> | 467.2286         | F    | <b>656.3151</b>  | 328.6612        | 639.2885         | 320.1479         |                 |                  | 5  |
| 9  | <b>1114.5238</b> | 557.7655        | 1097.4972       | 549.2522         | 1096.5132       | 548.7602         | Y    | <b>509.2467</b>  | 255.1270        | 492.2201         | 246.6137         |                 |                  | 4  |
| 10 | 1171.5452        | 586.2762        | 1154.5187       | 577.7630         | 1153.5347       | 577.2710         | G    | <b>346.1833</b>  | 173.5953        | 329.1568         | 165.0820         |                 |                  | 3  |
| 11 | 1285.5881        | 643.2977        | 1268.5616       | 634.7844         | 1267.5776       | 634.2924         | N    | <b>289.1619</b>  | 145.0846        | 272.1353         | 136.5713         |                 |                  | 2  |
| 12 |                  |                 |                 |                  |                 |                  | R    | 175.1190         | 88.0631         | 158.0924         | 79.5498          |                 |                  | 1  |

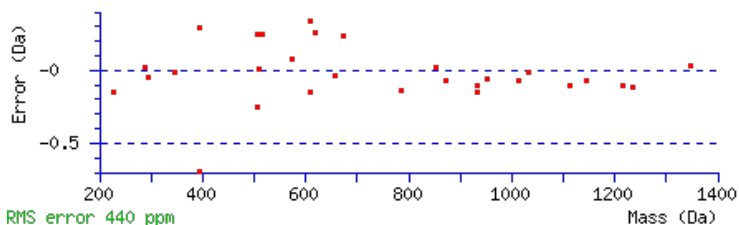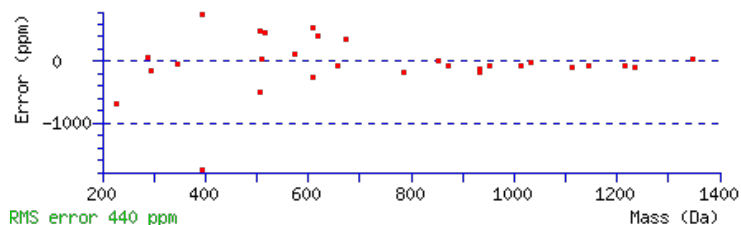

NCBI BLAST search of [LISNCSKFGYGNR](#)

(Parameters: blastp, nr protein database, expect=20000, no filter, PAM30)

Other BLAST [web gateways](#)

All matches to this query

| Score | Mr(calc)  | Delta   | Sequence                       | Site Analysis        |
|-------|-----------|---------|--------------------------------|----------------------|
| 69.1  | 1458.6925 | 0.0049  | <a href="#">LISNCSKFGYGNR</a>  | Deamidated N4 99.99% |
| 27.2  | 1458.6925 | 0.0049  | <a href="#">LISNCSKFGYGNR</a>  | Deamidated N11 0.01% |
| 9.5   | 1458.6950 | 0.0024  | <a href="#">LQSOGQSPQQR</a>    |                      |
| 9.5   | 1458.6950 | 0.0024  | <a href="#">LQSOGQSPQQR</a>    |                      |
| 9.1   | 1458.7024 | -0.0050 | <a href="#">LQALVNSLCAGQSP</a> |                      |
| 8.8   | 1458.7038 | -0.0063 | <a href="#">LLHDARFCEGK</a>    |                      |
| 8.0   | 1458.6950 | 0.0024  | <a href="#">LQSOGQSPQQR</a>    |                      |
| 7.3   | 1457.7007 | 0.9968  | <a href="#">KAYMNTQVVMNK</a>   |                      |
| 6.2   | 1458.6950 | 0.0024  | <a href="#">LQSOGQSPQQR</a>    |                      |
| 6.2   | 1458.6950 | 0.0024  | <a href="#">LQSOGQSPQQR</a>    |                      |

Mascot: <http://www.matrixscience.com/>

# MASCOT SCIENCE Mascot Search Results

## Peptide View

MS/MS Fragmentation of **FLNNGTCTAEGK**

Found in **D6R9Z8** in **con\_Xuniprot\_HUMAN3**, D6R9Z8\_HUMAN Complement factor I light chain OS=Homo sapiens GN=CFI PE=2 SV=1

Match to Query 1989: 1311.579728 from(656.797140,2+) intensity(6442.4878) rtinseconds(410) scans(757) index(1836)

Title: 111019\_Est\_ISCardio\_NMI\_YP\_G\_4Spectrum605\_scans\_757

Data file C:\mascot\20140703\_Tmgf\_1D\CSV\_UseAnalysis\MasterCSV\All\_Glyco\mgf\ptm\UC18ERLIC\_PTM\_35D.mgf

Click mouse within plot area to zoom in by factor of two about that point

Or, to Da

Label all possible matches Label matches used for scoring

Show Y-axis

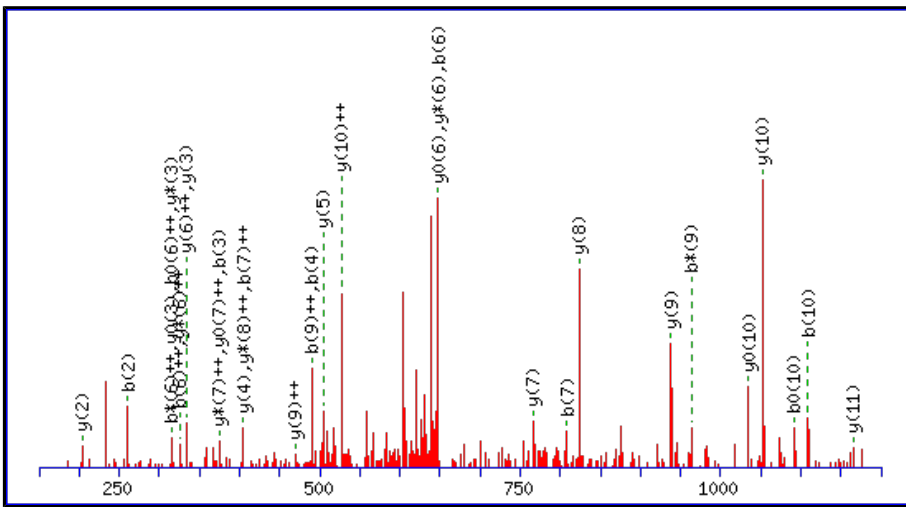

Monoisotopic mass of neutral peptide  $M_r(\text{calc})$ : 1311.5765

Fixed modifications: Carbamidomethyl (C) (apply to specified residues or termini only)

Variable modifications:

N4 : Deamidated (NQ)

Ions Score: 60 Expect: 0.0001

Matches : 34/114 fragment ions using 40 most intense peaks ([help](#))

| #  | b                | b <sup>++</sup> | b <sup>*</sup>  | b <sup>***</sup> | b <sup>0</sup>   | b <sup>0++</sup> | Seq. | y                | y <sup>++</sup> | y <sup>*</sup>  | y <sup>***</sup> | y <sup>0</sup>   | y <sup>0++</sup> | #  |
|----|------------------|-----------------|-----------------|------------------|------------------|------------------|------|------------------|-----------------|-----------------|------------------|------------------|------------------|----|
| 1  | 148.0757         | 74.5415         |                 |                  |                  |                  | F    |                  |                 |                 |                  |                  |                  | 12 |
| 2  | <b>261.1598</b>  | 131.0835        |                 |                  |                  |                  | L    | <b>1165.5154</b> | 583.2613        | 1148.4888       | 574.7481         | 1147.5048        | 574.2560         | 11 |
| 3  | <b>375.2027</b>  | 188.1050        | 358.1761        | 179.5917         |                  |                  | N    | <b>1052.4313</b> | <b>526.7193</b> | 1035.4048       | 518.2060         | <b>1034.4208</b> | 517.7140         | 10 |
| 4  | <b>490.2296</b>  | 245.6185        | 473.2031        | 237.1052         |                  |                  | N    | <b>938.3884</b>  | <b>469.6978</b> | 921.3618        | 461.1846         | 920.3778         | 460.6926         | 9  |
| 5  | 547.2511         | 274.1292        | 530.2245        | 265.6159         |                  |                  | G    | <b>823.3614</b>  | 412.1844        | 806.3349        | <b>403.6711</b>  | 805.3509         | 403.1791         | 8  |
| 6  | <b>648.2988</b>  | <b>324.6530</b> | 631.2722        | <b>316.1397</b>  | 630.2882         | <b>315.6477</b>  | T    | <b>766.3400</b>  | 383.6736        | 749.3134        | <b>375.1604</b>  | 748.3294         | <b>374.6683</b>  | 7  |
| 7  | <b>808.3294</b>  | <b>404.6683</b> | 791.3029        | 396.1551         | 790.3189         | 395.6631         | C    | 665.2923         | <b>333.1498</b> | <b>648.2658</b> | <b>324.6365</b>  | <b>647.2817</b>  | 324.1445         | 6  |
| 8  | 909.3771         | 455.1922        | 892.3505        | 446.6789         | 891.3665         | 446.1869         | T    | <b>505.2617</b>  | 253.1345        | 488.2351        | 244.6212         | 487.2511         | 244.1292         | 5  |
| 9  | 980.4142         | <b>490.7107</b> | <b>963.3877</b> | 482.1975         | 962.4036         | 481.7055         | A    | <b>404.2140</b>  | 202.6106        | 387.1874        | 194.0974         | 386.2034         | 193.6053         | 4  |
| 10 | <b>1109.4568</b> | 555.2320        | 1092.4303       | 546.7188         | <b>1091.4462</b> | 546.2268         | E    | <b>333.1769</b>  | 167.0921        | <b>316.1503</b> | 158.5788         | <b>315.1663</b>  | 158.0868         | 3  |
| 11 | 1166.4783        | 583.7428        | 1149.4517       | 575.2295         | 1148.4677        | 574.7375         | G    | <b>204.1343</b>  | 102.5708        | 187.1077        | 94.0575          |                  |                  | 2  |
| 12 |                  |                 |                 |                  |                  |                  | K    | 147.1128         | 74.0600         | 130.0863        | 65.5468          |                  |                  | 1  |

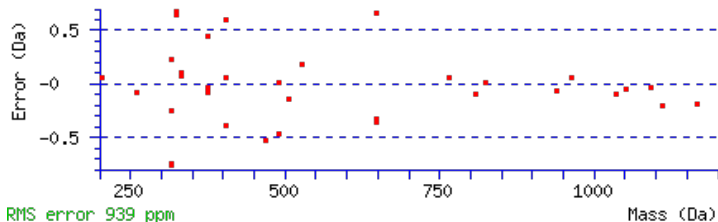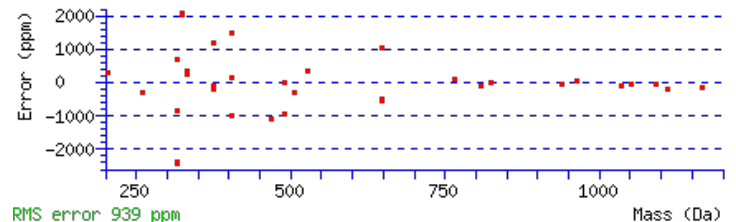



NCBI BLAST search of [FLNNGTCTAEGK](#)

(Parameters: blastp, nr protein database, expect=20000, no filter, PAM30)

Other BLAST [web gateways](#)

**All matches to this query**

| Score | Mr(calc)  | Delta  | Sequence                      | Site Analysis        |
|-------|-----------|--------|-------------------------------|----------------------|
| 59.9  | 1311.5765 | 0.0032 | <a href="#">FLNNGTCTAEGK</a>  | Deamidated N4 94.77% |
| 47.3  | 1311.5765 | 0.0032 | <a href="#">FLNNGTCTAEGK</a>  | Deamidated N3 5.23%  |
| 10.8  | 1310.5738 | 1.0059 | <a href="#">GANNGKOYGSEGK</a> |                      |
| 9.5   | 1310.5813 | 0.9985 | <a href="#">QFMNKSLSGPGQ</a>  |                      |
| 8.8   | 1309.5786 | 2.0011 | <a href="#">QEDGQLNNTYK</a>   |                      |
| 7.7   | 1310.5772 | 1.0025 | <a href="#">ASTDTSMNRSRK</a>  |                      |
| 5.2   | 1309.5748 | 2.0050 | <a href="#">QQVPTNLMTFE</a>   |                      |
| 4.7   | 1310.5813 | 0.9985 | <a href="#">VVCAGYDNGDIK</a>  |                      |
| 3.2   | 1309.5786 | 2.0011 | <a href="#">QADPNLHEAEGK</a>  |                      |
| 1.3   | 1311.5765 | 0.0033 | <a href="#">NMREQYDDLK</a>    |                      |

Mascot: <http://www.matrixscience.com/>

# MATRIX SCIENCE Mascot Search Results

## Peptide View

MS/MS Fragmentation of **LSDLINSTECLHVHCR**

Found in **E7ETH0** in **con\_Xuniprot\_HUMAN3**, E7ETH0\_HUMAN Complement factor I light chain OS=Homo sapiens GN=CFI PE=2 SV=1

Match to Query 13064: 2040.940376 from(511.242370,4+) intensity(61112.3945) rtinseconds(939) scans(1955) index(724)

Title: 111019\_Est\_ISCardio\_NMI\_YP\_G\_2Spectrum1657\_scans\_\_1955

Data file C:\mascot\20140703\_Tmgf\_1D\CSV\_UseAnalysis\MasterCSV\All\_Glyco\mgf\ptm\UC18ERLIC\_PTM\_35D.mgf

Click mouse within plot area to zoom in by factor of two about that point

Or, to Da

Label all possible matches Label matches used for scoring

Show Y-axis

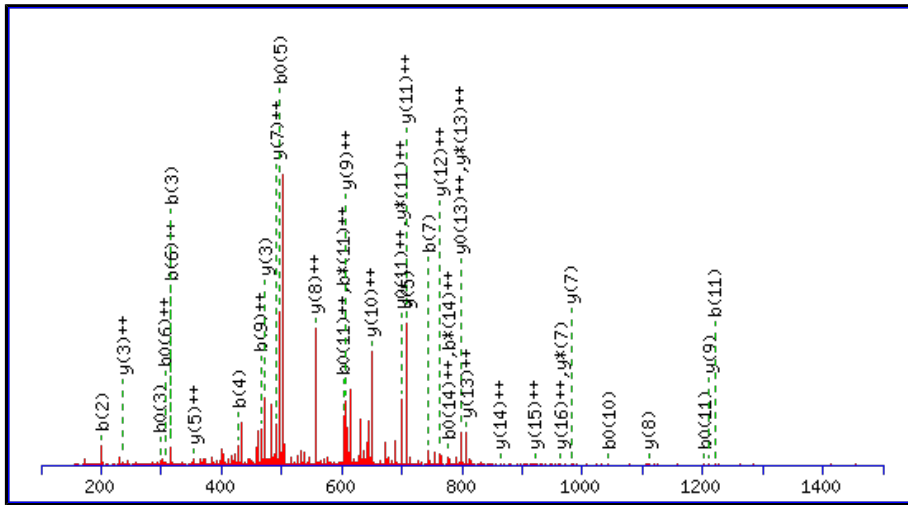

Monoisotopic mass of neutral peptide Mr(calc): 2040.9357

Fixed modifications: Carbamidomethyl (C) (apply to specified residues or termini only)

Variable modifications:

N7 : Deamidated (NQ)

Ions Score: 60 Expect: 0.0002

Matches : 38/164 fragment ions using 71 most intense peaks ([help](#))

| #  | b                | b <sup>++</sup> | b <sup>*</sup> | b <sup>*++</sup> | b <sup>0</sup>   | b <sup>0++</sup> | Seq. | y                | y <sup>++</sup> | y <sup>*</sup>  | y <sup>*++</sup> | y <sup>0</sup> | y <sup>0++</sup> | #  |
|----|------------------|-----------------|----------------|------------------|------------------|------------------|------|------------------|-----------------|-----------------|------------------|----------------|------------------|----|
| 1  | 114.0913         | 57.5493         |                |                  |                  |                  | L    |                  |                 |                 |                  |                |                  | 17 |
| 2  | <b>201.1234</b>  | 101.0653        |                |                  | 183.1128         | 92.0600          | S    | 1928.8589        | <b>964.9331</b> | 1911.8324       | 956.4198         | 1910.8484      | 955.9278         | 16 |
| 3  | <b>316.1503</b>  | 158.5788        |                |                  | <b>298.1397</b>  | 149.5735         | D    | 1841.8269        | <b>921.4171</b> | 1824.8003       | 912.9038         | 1823.8163      | 912.4118         | 15 |
| 4  | <b>429.2344</b>  | 215.1208        |                |                  | 411.2238         | 206.1155         | L    | 1726.8000        | <b>863.9036</b> | 1709.7734       | 855.3903         | 1708.7894      | 854.8983         | 14 |
| 5  | 516.2664         | 258.6368        |                |                  | <b>498.2558</b>  | 249.6316         | S    | 1613.7159        | <b>807.3616</b> | 1596.6893       | <b>798.8483</b>  | 1595.7053      | <b>798.3563</b>  | 13 |
| 6  | 629.3505         | <b>315.1789</b> |                |                  | 611.3399         | <b>306.1736</b>  | I    | 1526.6839        | <b>763.8456</b> | 1509.6573       | 755.3323         | 1508.6733      | 754.8403         | 12 |
| 7  | <b>744.3774</b>  | 372.6923        | 727.3509       | 364.1791         | 726.3668         | 363.6871         | N    | 1413.5998        | <b>707.3035</b> | 1396.5732       | <b>698.7903</b>  | 1395.5892      | <b>698.2983</b>  | 11 |
| 8  | 831.4094         | 416.2084        | 814.3829       | 407.6951         | 813.3989         | 407.2031         | S    | 1298.5729        | <b>649.7901</b> | 1281.5463       | 641.2768         | 1280.5623      | 640.7848         | 10 |
| 9  | 932.4571         | <b>466.7322</b> | 915.4306       | 458.2189         | 914.4466         | 457.7269         | T    | <b>1211.5408</b> | <b>606.2740</b> | 1194.5143       | 597.7608         | 1193.5303      | 597.2688         | 9  |
| 10 | 1061.4997        | 531.2535        | 1044.4732      | 522.7402         | <b>1043.4891</b> | 522.2482         | E    | <b>1110.4931</b> | <b>555.7502</b> | 1093.4666       | 547.2369         | 1092.4826      | 546.7449         | 8  |
| 11 | <b>1221.5304</b> | 611.2688        | 1204.5038      | <b>602.7555</b>  | <b>1203.5198</b> | <b>602.2635</b>  | C    | <b>981.4506</b>  | <b>491.2289</b> | <b>964.4240</b> | 482.7156         |                |                  | 7  |
| 12 | 1334.6144        | 667.8108        | 1317.5879      | 659.2976         | 1316.6039        | 658.8056         | L    | 821.4199         | 411.2136        | 804.3934        | 402.7003         |                |                  | 6  |
| 13 | 1471.6733        | 736.3403        | 1454.6468      | 727.8270         | 1453.6628        | 727.3350         | H    | <b>708.3358</b>  | <b>354.6716</b> | 691.3093        | 346.1583         |                |                  | 5  |
| 14 | 1570.7417        | 785.8745        | 1553.7152      | <b>777.3612</b>  | 1552.7312        | <b>776.8692</b>  | V    | 571.2769         | 286.1421        | 554.2504        | 277.6288         |                |                  | 4  |
| 15 | 1707.8007        | 854.4040        | 1690.7741      | 845.8907         | 1689.7901        | 845.3987         | H    | <b>472.2085</b>  | <b>236.6079</b> | 455.1820        | 228.0946         |                |                  | 3  |
| 16 | 1867.8313        | 934.4193        | 1850.8048      | 925.9060         | 1849.8207        | 925.4140         | C    | 335.1496         | 168.0784        | 318.1231        | 159.5652         |                |                  | 2  |
| 17 |                  |                 |                |                  |                  |                  | R    | 175.1190         | 88.0631         | 158.0924        | 79.5498          |                |                  | 1  |

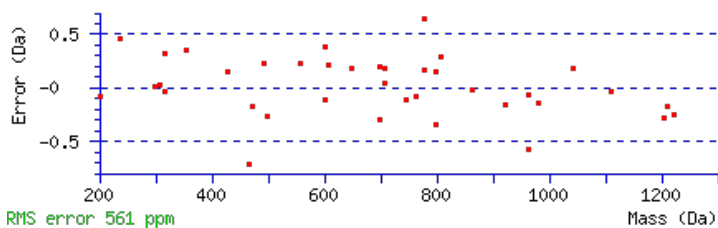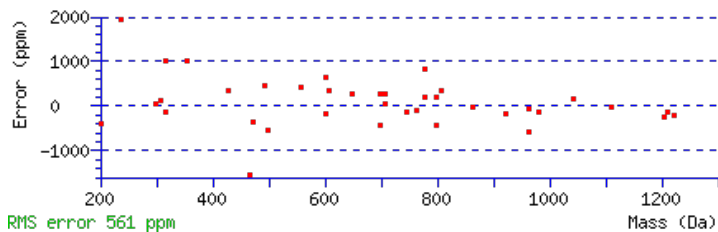

NCBI **BLAST** search of [LSDLSINSTECLHVHCR](#)

(Parameters: blastp, nr protein database, expect=20000, no filter, PAM30)

Other BLAST [web gateways](#)

**All matches to this query**

| Score | Mr(calc)  | Delta  | Sequence                            |
|-------|-----------|--------|-------------------------------------|
| 59.7  | 2040.9357 | 0.0047 | <a href="#">LSDLSINSTECLHVHCR</a>   |
| 10.6  | 2040.9384 | 0.0020 | <a href="#">EATWESVSMMLQLGGTVIG</a> |
| 10.0  | 2038.9300 | 2.0104 | <a href="#">GVSDMNSTIQVLTADNCAK</a> |
| 6.3   | 2039.9469 | 0.9934 | <a href="#">ENLATVEGNEFASIDERMK</a> |
| 6.2   | 2040.9310 | 0.0094 | <a href="#">ENLATVEGNEFASIDERMK</a> |
| 4.7   | 2039.9283 | 1.0121 | <a href="#">ETKRALDFTDSQENEEK</a>   |
| 4.5   | 2038.9339 | 2.0064 | <a href="#">SLDTNIMKHMPLNYSK</a>    |
| 4.5   | 2038.9339 | 2.0064 | <a href="#">SLDTNIMKHMPLNYSK</a>    |
| 4.5   | 2038.9299 | 2.0104 | <a href="#">QMENGMLVTDSAGKQLQR</a>  |
| 4.0   | 2038.9299 | 2.0104 | <a href="#">QMENGMLVTDSAGKQLQR</a>  |

Mascot: <http://www.matrixscience.com/>

# MATRIX SCIENCE Mascot Search Results

## Peptide View

MS/MS Fragmentation of **FLNNGTCTAEGK**

Found in **D6R9Z8** in **con\_Xuniprot\_HUMAN3**, D6R9Z8\_HUMAN Complement factor I light chain OS=Homo sapiens GN=CFI PE=2 SV=1

Match to Query 2012: 1312.565368 from(657.289960,2+) intensity(9313.6094) rtinseconds(419) scans(889) index(6135)

Title: 111019\_Est\_ISCardio\_NMI\_YP\_G\_9Spectrum763\_scans\_\_889

Data file C:\mascot\20140703\_Tmgf\_1D\CSV\_UseAnalysis\MasterCSV\All\_Glyco\mgf\ptm\UC18ERLIC\_PTM\_35D.mgf

Click mouse within plot area to zoom in by factor of two about that point

Or, to Da

Label all possible matches Label matches used for scoring

Show Y-axis

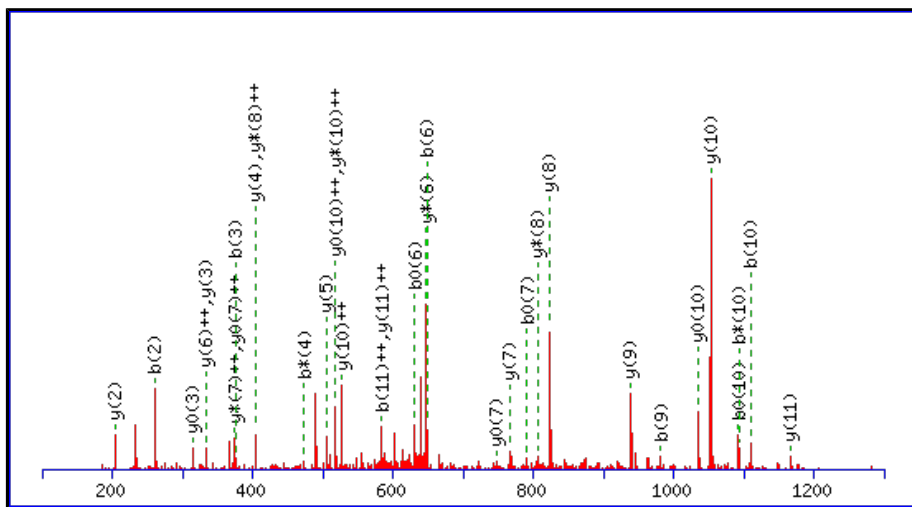

Monoisotopic mass of neutral peptide  $M_r(\text{calc})$ : 1312.5605

Fixed modifications: Carbamidomethyl (C) (apply to specified residues or termini only)

Variable modifications:

N3 : Deamidated (NQ)

N4 : Deamidated (NQ)

Ions Score: 57 Expect: 0.00014

Matches : 33/114 fragment ions using 52 most intense peaks ([help](#))

| #  | b                | b <sup>++</sup> | b*               | b <sup>+++</sup> | b <sup>0</sup>   | b <sup>0++</sup> | Seq. | y                | y <sup>++</sup> | y*              | y <sup>+++</sup> | y <sup>0</sup>   | y <sup>0++</sup> | #  |
|----|------------------|-----------------|------------------|------------------|------------------|------------------|------|------------------|-----------------|-----------------|------------------|------------------|------------------|----|
| 1  | 148.0757         | 74.5415         |                  |                  |                  |                  | F    |                  |                 |                 |                  |                  |                  | 12 |
| 2  | <b>261.1598</b>  | 131.0835        |                  |                  |                  |                  | L    | <b>1166.4994</b> | <b>583.7533</b> | 1149.4728       | 575.2401         | 1148.4888        | 574.7481         | 11 |
| 3  | <b>376.1867</b>  | 188.5970        | 359.1601         | 180.0837         |                  |                  | N    | <b>1053.4153</b> | <b>527.2113</b> | 1036.3888       | <b>518.6980</b>  | <b>1035.4048</b> | <b>518.2060</b>  | 10 |
| 4  | 491.2136         | 246.1105        | <b>474.1871</b>  | 237.5972         |                  |                  | N    | <b>938.3884</b>  | 469.6978        | 921.3618        | 461.1846         | 920.3778         | 460.6926         | 9  |
| 5  | 548.2351         | 274.6212        | 531.2086         | 266.1079         |                  |                  | G    | <b>823.3614</b>  | 412.1844        | <b>806.3349</b> | <b>403.6711</b>  | 805.3509         | 403.1791         | 8  |
| 6  | <b>649.2828</b>  | 325.1450        | 632.2562         | 316.6318         | <b>631.2722</b>  | 316.1397         | T    | <b>766.3400</b>  | 383.6736        | 749.3134        | <b>375.1604</b>  | <b>748.3294</b>  | <b>374.6683</b>  | 7  |
| 7  | 809.3134         | 405.1604        | 792.2869         | 396.6471         | <b>791.3029</b>  | 396.1551         | C    | 665.2923         | <b>333.1498</b> | <b>648.2658</b> | 324.6365         | 647.2817         | 324.1445         | 6  |
| 8  | 910.3611         | 455.6842        | 893.3346         | 447.1709         | 892.3505         | 446.6789         | T    | <b>505.2617</b>  | 253.1345        | 488.2351        | 244.6212         | 487.2511         | 244.1292         | 5  |
| 9  | <b>981.3982</b>  | 491.2028        | 964.3717         | 482.6895         | 963.3877         | 482.1975         | A    | <b>404.2140</b>  | 202.6106        | 387.1874        | 194.0974         | 386.2034         | 193.6053         | 4  |
| 10 | <b>1110.4408</b> | 555.7240        | <b>1093.4143</b> | 547.2108         | <b>1092.4303</b> | 546.7188         | E    | <b>333.1769</b>  | 167.0921        | 316.1503        | 158.5788         | <b>315.1663</b>  | 158.0868         | 3  |
| 11 | 1167.4623        | <b>584.2348</b> | 1150.4357        | 575.7215         | 1149.4517        | 575.2295         | G    | <b>204.1343</b>  | 102.5708        | 187.1077        | 94.0575          |                  |                  | 2  |
| 12 |                  |                 |                  |                  |                  |                  | K    | 147.1128         | 74.0600         | 130.0863        | 65.5468          |                  |                  | 1  |

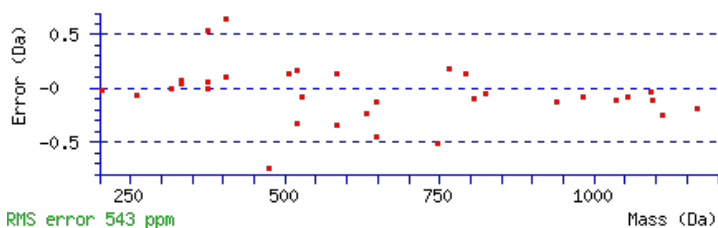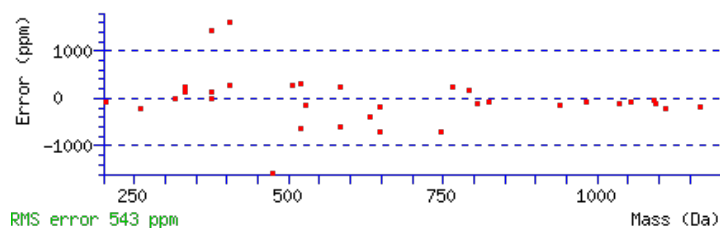

NCBI **BLAST** search of [FLNNGTCTAEGK](#)

(Parameters: blastp, nr protein database, expect=20000, no filter, PAM30)

Other BLAST [web gateways](#)

**All matches to this query**

| Score | Mr(calc)  | Delta   | Sequence                     |
|-------|-----------|---------|------------------------------|
| 56.9  | 1312.5605 | 0.0049  | <a href="#">FLNNGTCTAEGK</a> |
| 10.2  | 1311.5686 | 0.9967  | <a href="#">MINIESMDTDK</a>  |
| 9.2   | 1312.5717 | -0.0063 | <a href="#">EMSNANQYISR</a>  |
| 9.2   | 1312.5717 | -0.0063 | <a href="#">EMSNANQYISR</a>  |
| 7.8   | 1312.5686 | -0.0032 | <a href="#">MGNGMCSRKQK</a>  |
| 6.4   | 1312.5614 | 0.0040  | <a href="#">MIYCCTGPAPK</a>  |
| 6.1   | 1312.5605 | 0.0049  | <a href="#">NMREQYDDLK</a>   |
| 6.0   | 1310.5595 | 2.0059  | <a href="#">KMGADENQSGMK</a> |
| 5.9   | 1312.5605 | 0.0049  | <a href="#">NFSCNVNTDIK</a>  |
| 5.8   | 1311.5686 | 0.9968  | <a href="#">MENQMKGLESK</a>  |

Mascot: <http://www.matrixscience.com/>

# MASCOT SCIENCE Mascot Search Results

## Peptide View

MS/MS Fragmentation of **SIPACVPWSPYLFQPNDTCIVSGWGR**

Found in **E7ETH0** in **con\_Xuniprot\_HUMAN3**, E7ETH0\_HUMAN Complement factor I light chain OS=Homo sapiens GN=CFI PE=2 SV=1

Match to Query 27252: 3007.411392 from(1003.477740,3+) intensity(72679.7734) rtinseconds(2585) scans(6793) index(24879)

Title: 111019\_Est\_MI\_YS\_G\_06Spectrum5927\_scans\_\_6793

Data file C:\mascot\20140703\_Tmgf\_1D\CSV\_UseAnalysis\MasterCSV\All\_Glyco\mgf\ptm\UC18ERLIC\_PTM\_35D.mgf

Click mouse within plot area to zoom in by factor of two about that point

Or, to Da

Label all possible matches Label matches used for scoring

Show Y-axis

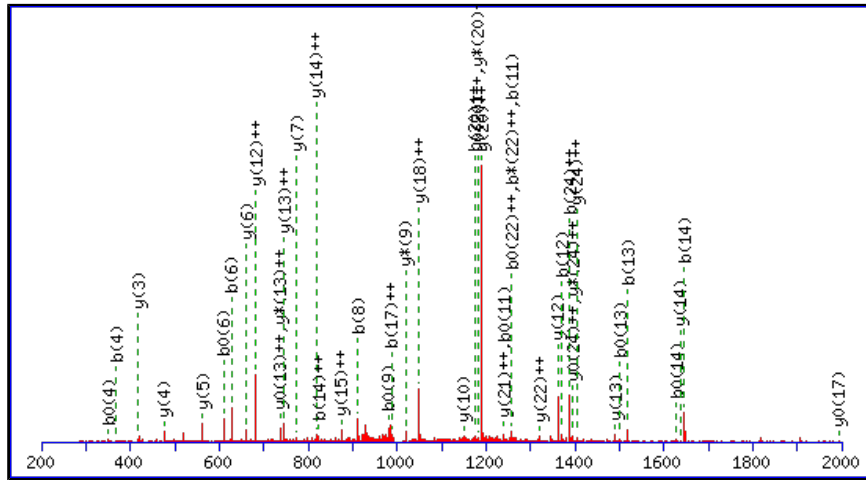

Monoisotopic mass of neutral peptide Mr(calc): 3007.3997

Fixed modifications: Carbamidomethyl (C) (apply to specified residues or termini only)

Variable modifications:

N16 : Deamidated (NQ)

Ions Score: 55 Expect: 0.00074

Matches : 45/266 fragment ions using 69 most intense peaks ([help](#))

| #  | b         | b <sup>++</sup> | b <sup>*</sup> | b <sup>*++</sup> | b <sup>0</sup> | b <sup>0++</sup> | Seq. | y         | y <sup>++</sup> | y <sup>*</sup> | y <sup>*++</sup> | y <sup>0</sup> | y <sup>0++</sup> | #  |
|----|-----------|-----------------|----------------|------------------|----------------|------------------|------|-----------|-----------------|----------------|------------------|----------------|------------------|----|
| 1  | 88.0393   | 44.5233         |                |                  | 70.0287        | 35.5180          | S    |           |                 |                |                  |                |                  | 26 |
| 2  | 201.1234  | 101.0653        |                |                  | 183.1128       | 92.0600          | I    | 2921.3749 | 1461.1911       | 2904.3484      | 1452.6778        | 2903.3644      | 1452.1858        | 25 |
| 3  | 298.1761  | 149.5917        |                |                  | 280.1656       | 140.5864         | P    | 2808.2909 | 1404.6491       | 2791.2643      | 1396.1358        | 2790.2803      | 1395.6438        | 24 |
| 4  | 369.2132  | 185.1103        |                |                  | 351.2027       | 176.1050         | A    | 2711.2381 | 1356.1227       | 2694.2116      | 1347.6094        | 2693.2275      | 1347.1174        | 23 |
| 5  | 529.2439  | 265.1256        |                |                  | 511.2333       | 256.1203         | C    | 2640.2010 | 1320.6041       | 2623.1744      | 1312.0909        | 2622.1904      | 1311.5989        | 22 |
| 6  | 628.3123  | 314.6598        |                |                  | 610.3017       | 305.6545         | V    | 2480.1703 | 1240.5888       | 2463.1438      | 1232.0755        | 2462.1598      | 1231.5835        | 21 |
| 7  | 725.3651  | 363.1862        |                |                  | 707.3545       | 354.1809         | P    | 2381.1019 | 1191.0546       | 2364.0754      | 1182.5413        | 2363.0914      | 1182.0493        | 20 |
| 8  | 911.4444  | 456.2258        |                |                  | 893.4338       | 447.2205         | W    | 2284.0492 | 1142.5282       | 2267.0226      | 1134.0149        | 2266.0386      | 1133.5229        | 19 |
| 9  | 998.4764  | 499.7418        |                |                  | 980.4658       | 490.7366         | S    | 2097.9699 | 1049.4886       | 2080.9433      | 1040.9753        | 2079.9593      | 1040.4833        | 18 |
| 10 | 1095.5292 | 548.2682        |                |                  | 1077.5186      | 539.2629         | P    | 2010.9378 | 1005.9726       | 1993.9113      | 997.4593         | 1992.9273      | 996.9673         | 17 |
| 11 | 1258.5925 | 629.7999        |                |                  | 1240.5819      | 620.7946         | Y    | 1913.8851 | 957.4462        | 1896.8585      | 948.9329         | 1895.8745      | 948.4409         | 16 |
| 12 | 1371.6766 | 686.3419        |                |                  | 1353.6660      | 677.3366         | L    | 1750.8217 | 875.9145        | 1733.7952      | 867.4012         | 1732.8112      | 866.9092         | 15 |
| 13 | 1518.7450 | 759.8761        |                |                  | 1500.7344      | 750.8708         | F    | 1637.7377 | 819.3725        | 1620.7111      | 810.8592         | 1619.7271      | 810.3672         | 14 |
| 14 | 1646.8036 | 823.9054        | 1629.7770      | 815.3921         | 1628.7930      | 814.9001         | Q    | 1490.6693 | 745.8383        | 1473.6427      | 737.3250         | 1472.6587      | 736.8330         | 13 |
| 15 | 1743.8563 | 872.4318        | 1726.8298      | 863.9185         | 1725.8458      | 863.4265         | P    | 1362.6107 | 681.8090        | 1345.5841      | 673.2957         | 1344.6001      | 672.8037         | 12 |
| 16 | 1858.8833 | 929.9453        | 1841.8567      | 921.4320         | 1840.8727      | 920.9400         | N    | 1265.5579 | 633.2826        | 1248.5314      | 624.7693         | 1247.5473      | 624.2773         | 11 |
| 17 | 1973.9102 | 987.4587        | 1956.8837      | 978.9455         | 1955.8996      | 978.4535         | D    | 1150.5310 | 575.7691        | 1133.5044      | 567.2558         | 1132.5204      | 566.7638         | 10 |
| 18 | 2074.9579 | 1037.9826       | 2057.9313      | 1029.4693        | 2056.9473      | 1028.9773        | T    | 1035.5040 | 518.2557        | 1018.4775      | 509.7424         | 1017.4935      | 509.2504         | 9  |
| 19 | 2234.9885 | 1117.9979       | 2217.9620      | 1109.4846        | 2216.9780      | 1108.9926        | C    | 934.4563  | 467.7318        | 917.4298       | 459.2185         | 916.4458       | 458.7265         | 8  |
| 20 | 2348.0726 | 1174.5399       | 2331.0461      | 1166.0267        | 2330.0620      | 1165.5347        | I    | 774.4257  | 387.7165        | 757.3992       | 379.2032         | 756.4151       | 378.7112         | 7  |
| 21 | 2447.1410 | 1224.0741       | 2430.1145      | 1215.5609        | 2429.1305      | 1215.0689        | V    | 661.3416  | 331.1745        | 644.3151       | 322.6612         | 643.3311       | 322.1692         | 6  |
| 22 | 2534.1730 | 1267.5902       | 2517.1465      | 1259.0769        | 2516.1625      | 1258.5849        | S    | 562.2732  | 281.6402        | 545.2467       | 273.1270         | 544.2627       | 272.6350         | 5  |
| 23 | 2591.1945 | 1296.1009       | 2574.1680      | 1287.5876        | 2573.1839      | 1287.0956        | G    | 475.2412  | 238.1242        | 458.2146       | 229.6110         |                |                  | 4  |

|    |           |           |           |           |           |           |   |          |          |          |          |  |  |   |
|----|-----------|-----------|-----------|-----------|-----------|-----------|---|----------|----------|----------|----------|--|--|---|
| 24 | 2777.2738 | 1389.1405 | 2760.2473 | 1380.6273 | 2759.2633 | 1380.1353 | W | 418.2197 | 209.6135 | 401.1932 | 201.1002 |  |  | 3 |
| 25 | 2834.2953 | 1417.6513 | 2817.2687 | 1409.1380 | 2816.2847 | 1408.6460 | G | 232.1404 | 116.5738 | 215.1139 | 108.0606 |  |  | 2 |
| 26 |           |           |           |           |           |           | R | 175.1190 | 88.0631  | 158.0924 | 79.5498  |  |  | 1 |

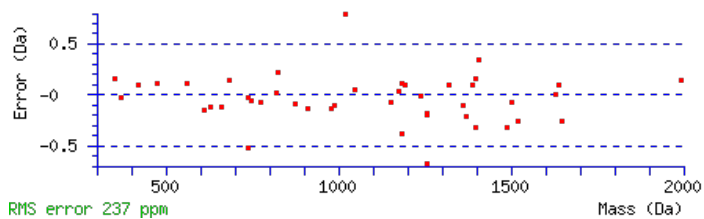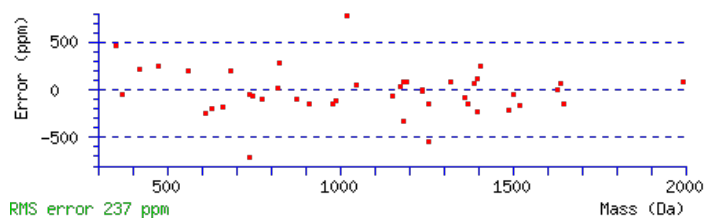

NCBI BLAST search of [SIPACVPWSPYLEFQPNDTCIVSGWGR](#)  
 (Parameters: blastp, nr protein database, expect=20000, no filter, PAM30)  
 Other BLAST [web gateways](#)

All matches to this query

| Score | Mr(calc)  | Delta  | Sequence                                     | Site Analysis         |
|-------|-----------|--------|----------------------------------------------|-----------------------|
| 55.1  | 3007.3997 | 0.0117 | <a href="#">SIPACVPWSPYLEFQPNDTCIVSGWGR</a>  | Deamidated N16 74.91% |
| 50.3  | 3007.3997 | 0.0117 | <a href="#">SIPACVPWSPYLEFQPNDTCIVSGWGR</a>  | Deamidated Q14 25.09% |
| 40.0  | 3006.4157 | 0.9957 | <a href="#">SIPACVPWSPYLEFQPNDTCIVSGWGR</a>  |                       |
| 14.1  | 3005.4070 | 2.0044 | <a href="#">SAIEISIAECKGTEQDTCTVHLSGDRK</a>  |                       |
| 8.9   | 3007.3981 | 0.0133 | <a href="#">QAMNHFVQENGLRAKPTGNGIYINGR</a>   |                       |
| 8.4   | 3006.4088 | 1.0026 | <a href="#">SSDKGSPSQSTSVKVMINILDENDNAPR</a> |                       |
| 8.4   | 3006.4088 | 1.0026 | <a href="#">SSDKGSPSQSTSVKVMINILDENDNAPR</a> |                       |
| 8.4   | 3006.4088 | 1.0026 | <a href="#">SSDKGSPSQSTSVKVMINILDENDNAPR</a> |                       |
| 4.7   | 3005.3932 | 2.0182 | <a href="#">SFGRYPSLMENNNMRIQDTLDLVMK</a>    |                       |
| 4.7   | 3005.3932 | 2.0182 | <a href="#">SFGRYPSLMENNNMRIQDTLDLVMK</a>    |                       |

Mascot: <http://www.matrixscience.com/>



# MATRIX SCIENCE Mascot Search Results

## Peptide View

MS/MS Fragmentation of **LPYQCPKNGTAVCATNR**

Found in **D6R9Z8** in **con\_Xuniprot\_HUMAN3**, D6R9Z8\_HUMAN Complement factor I light chain OS=Homo sapiens GN=CFI PE=2 SV=1

Match to Query 11741: 1949.915232 from(650.979020,3+) intensity(11413.1475) rtinseconds(405) scans(856) index(24338)

Title: 111019\_Est\_MI\_YS\_G\_06Spectrum729\_scans\_\_856

Data file C:\mascot\20140703\_Tmgf\_1D\CSV\_UseAnalysis\MasterCSV\All\_Glyco\mgf\ptm\UC18ERLIC\_PTM\_35D.mgf

Click mouse within plot area to zoom in by factor of two about that point

Or, to Da

Label all possible matches Label matches used for scoring

Show Y-axis

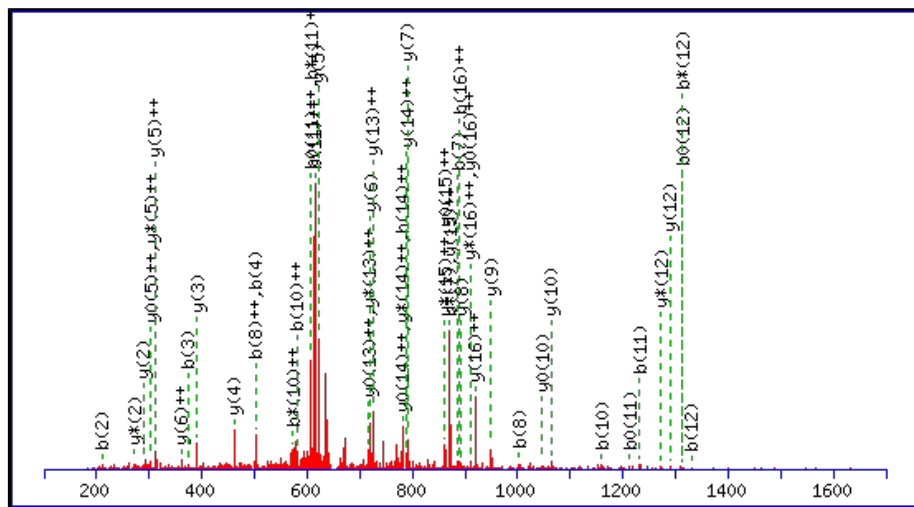

Monoisotopic mass of neutral peptide Mr(calc): 1949.9088

Fixed modifications: Carbamidomethyl (C) (apply to specified residues or termini only)

Variable modifications:

N8 : Deamidated (NQ)

Ions Score: 42 Expect: 0.015

Matches : 49/164 fragment ions using 103 most intense peaks ([help](#))

| #  | b                | b <sup>++</sup> | b <sup>*</sup>   | b <sup>*++</sup> | b <sup>0</sup>   | b <sup>0++</sup> | Seq. | y                | y <sup>++</sup> | y <sup>*</sup>   | y <sup>*++</sup> | y <sup>0</sup>   | y <sup>0++</sup> | #  |
|----|------------------|-----------------|------------------|------------------|------------------|------------------|------|------------------|-----------------|------------------|------------------|------------------|------------------|----|
| 1  | 114.0913         | 57.5493         |                  |                  |                  |                  | L    |                  |                 |                  |                  |                  |                  | 17 |
| 2  | <b>211.1441</b>  | 106.0757        |                  |                  |                  |                  | P    | 1837.8320        | 919.4196        | 1820.8054        | 910.9064         | 1819.8214        | 910.4143         | 16 |
| 3  | <b>374.2074</b>  | 187.6074        |                  |                  |                  |                  | Y    | 1740.7792        | 870.8932        | 1723.7527        | 862.3800         | 1722.7687        | 861.8880         | 15 |
| 4  | <b>502.2660</b>  | 251.6366        | 485.2395         | 243.1234         |                  |                  | Q    | 1577.7159        | 789.3616        | 1560.6893        | 780.8483         | 1559.7053        | 780.3563         | 14 |
| 5  | 662.2967         | 331.6520        | 645.2701         | 323.1387         |                  |                  | C    | 1449.6573        | 725.3323        | 1432.6308        | 716.8190         | 1431.6467        | 716.3270         | 13 |
| 6  | 759.3494         | 380.1784        | 742.3229         | 371.6651         |                  |                  | P    | <b>1289.6267</b> | 645.3170        | <b>1272.6001</b> | 636.8037         | 1271.6161        | 636.3117         | 12 |
| 7  | <b>887.4444</b>  | 444.2258        | <b>870.4178</b>  | 435.7126         |                  |                  | K    | 1192.5739        | 596.7906        | 1175.5473        | 588.2773         | 1174.5633        | 587.7853         | 11 |
| 8  | <b>1002.4713</b> | <b>501.7393</b> | 985.4448         | 493.2260         |                  |                  | N    | <b>1064.4789</b> | 532.7431        | 1047.4524        | 524.2298         | <b>1046.4684</b> | 523.7378         | 10 |
| 9  | 1059.4928        | 530.2500        | 1042.4662        | 521.7368         |                  |                  | G    | <b>949.4520</b>  | 475.2296        | 932.4254         | 466.7164         | 931.4414         | 466.2244         | 9  |
| 10 | <b>1160.5405</b> | <b>580.7739</b> | 1143.5139        | <b>572.2606</b>  | 1142.5299        | 571.7686         | T    | <b>892.4305</b>  | 446.7189        | 875.4040         | 438.2056         | 874.4200         | 437.7136         | 8  |
| 11 | <b>1231.5776</b> | <b>616.2924</b> | 1214.5510        | <b>607.7792</b>  | <b>1213.5670</b> | <b>607.2871</b>  | A    | <b>791.3828</b>  | 396.1951        | 774.3563         | 387.6818         | 773.3723         | 387.1898         | 7  |
| 12 | <b>1330.6460</b> | 665.8266        | <b>1313.6195</b> | 657.3134         | <b>1312.6354</b> | 656.8214         | V    | <b>720.3457</b>  | <b>360.6765</b> | 703.3192         | 352.1632         | 702.3352         | 351.6712         | 6  |
| 13 | 1490.6767        | 745.8420        | 1473.6501        | 737.3287         | 1472.6661        | 736.8367         | C    | <b>621.2773</b>  | <b>311.1423</b> | 604.2508         | <b>302.6290</b>  | 603.2668         | <b>302.1370</b>  | 5  |
| 14 | 1561.7138        | <b>781.3605</b> | 1544.6872        | 772.8472         | 1543.7032        | 772.3552         | A    | <b>461.2467</b>  | 231.1270        | 444.2201         | 222.6137         | 443.2361         | 222.1217         | 4  |
| 15 | 1662.7614        | 831.8844        | 1645.7349        | 823.3711         | 1644.7509        | 822.8791         | T    | <b>390.2096</b>  | 195.6084        | 373.1830         | 187.0951         | 372.1990         | 186.6031         | 3  |
| 16 | 1776.8044        | <b>888.9058</b> | 1759.7778        | 880.3925         | 1758.7938        | 879.9005         | N    | <b>289.1619</b>  | 145.0846        | <b>272.1353</b>  | 136.5713         |                  |                  | 2  |
| 17 |                  |                 |                  |                  |                  |                  | R    | 175.1190         | 88.0631         | 158.0924         | 79.5498          |                  |                  | 1  |

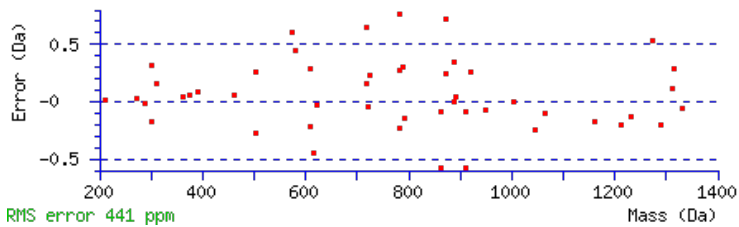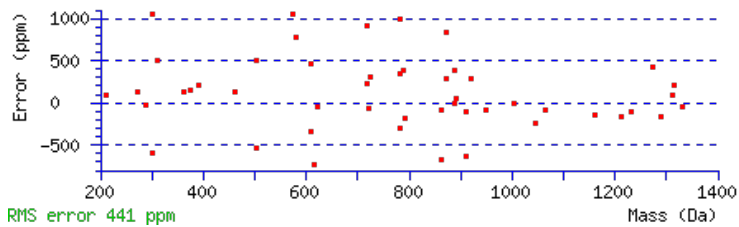

NCBI **BLAST** search of [LPYQCPKNGTAVCATNR](#)

(Parameters: blastp, nr protein database, expect=20000, no filter, PAM30)

Other BLAST [web gateways](#)

**All matches to this query**

| Score | Mr(calc)  | Delta   | Sequence                            | Site Analysis        |
|-------|-----------|---------|-------------------------------------|----------------------|
| 41.8  | 1949.9088 | 0.0065  | <a href="#">LPYQCPKNGTAVCATNR</a>   | Deamidated N8 71.77% |
| 37.7  | 1949.9088 | 0.0065  | <a href="#">LPYQCPKNGTAVCATNR</a>   | Deamidated Q4 27.86% |
| 19.0  | 1949.9088 | 0.0065  | <a href="#">LPYQCPKNGTAVCATNR</a>   | Deamidated N16 0.38% |
| 10.7  | 1948.9048 | 1.0105  | <a href="#">GSMVNLTSESHENTVSIK</a>  |                      |
| 4.9   | 1949.9153 | -0.0000 | <a href="#">SVDESGSLAAYHLCSLNK</a>  |                      |
| 3.1   | 1948.9086 | 1.0066  | <a href="#">EDEQATIGAVRSASASSDR</a> |                      |
| 1.8   | 1948.9061 | 1.0091  | <a href="#">DCGKAFTQNSDLTKHAR</a>   |                      |
| 1.8   | 1948.9061 | 1.0091  | <a href="#">DCGKAFTQNSDLTKHAR</a>   |                      |
| 1.0   | 1948.9088 | 1.0064  | <a href="#">MOSSPNGQFVAPSDIOLK</a>  |                      |

Mascot: <http://www.matrixscience.com/>

# MATRIX SCIENCE Mascot Search Results

## Peptide View

MS/MS Fragmentation of **FLNNGTCTAEGKFSVSLK**

Found in **D6R9Z8** in **con\_Xuniprot\_HUMAN3**, D6R9Z8\_HUMAN Complement factor I light chain OS=Homo sapiens GN=CFI PE=2 SV=1

Match to Query 11874: 1972.960932 from(658.660920,3+) intensity(77547.6250) rtinseconds(1304) scans(2913) index(8834)

Title: 111019\_Est\_ISCardio\_NMI\_YS\_G\_4Spectrum2458\_scans\_\_2913

Data file C:\mascot\20140703\_Tmgf\_1D\CSV\_UseAnalysis\MasterCSV\All\_Glyco\mgf\ptm\UC18ERLIC\_PTM\_35D.mgf

Click mouse within plot area to zoom in by factor of two about that point

Or, to Da

Label all possible matches Label matches used for scoring

Show Y-axis

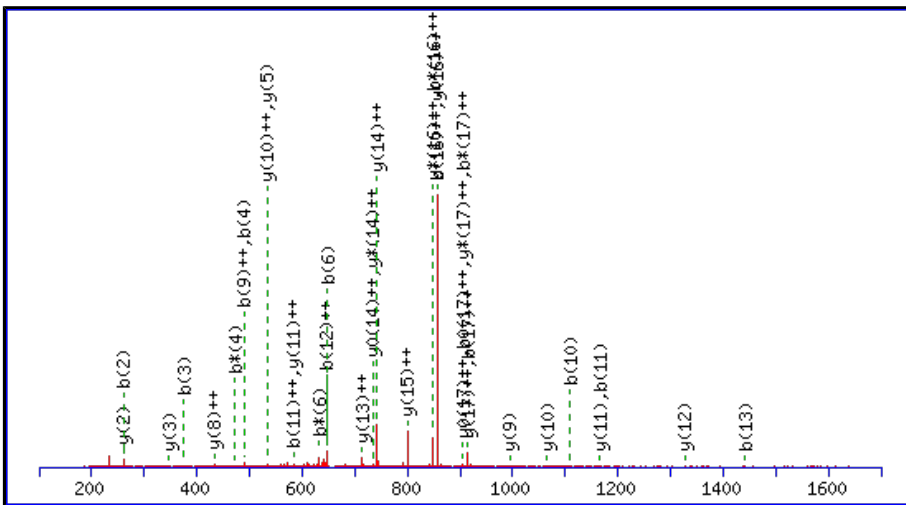

Monoisotopic mass of neutral peptide  $M_r(\text{calc})$ : 1972.9564

Fixed modifications: Carbamidomethyl (C) (apply to specified residues or termini only)

Variable modifications:

N4 : Deamidated (NQ)

Ions Score: 37 Expect: 0.053

Matches : 40/186 fragment ions using 73 most intense peaks ([help](#))

| #  | b                | b <sup>++</sup> | b <sup>*</sup>  | b <sup>*++</sup> | b <sup>0</sup> | b <sup>0++</sup> | Seq. | y                | y <sup>++</sup> | y <sup>*</sup>  | y <sup>*++</sup> | y <sup>0</sup> | y <sup>0++</sup> | #  |
|----|------------------|-----------------|-----------------|------------------|----------------|------------------|------|------------------|-----------------|-----------------|------------------|----------------|------------------|----|
| 1  | 148.0757         | 74.5415         |                 |                  |                |                  | F    |                  |                 |                 |                  |                |                  | 18 |
| 2  | <b>261.1598</b>  | 131.0835        |                 |                  |                |                  | L    | 1826.8953        | <b>913.9513</b> | 1809.8687       | <b>905.4380</b>  | 1808.8847      | <b>904.9460</b>  | 17 |
| 3  | <b>375.2027</b>  | 188.1050        | 358.1761        | 179.5917         |                |                  | N    | 1713.8112        | <b>857.4093</b> | 1696.7847       | <b>848.8960</b>  | 1695.8007      | <b>848.4040</b>  | 16 |
| 4  | <b>490.2296</b>  | 245.6185        | <b>473.2031</b> | 237.1052         |                |                  | N    | 1599.7683        | <b>800.3878</b> | 1582.7418       | 791.8745         | 1581.7577      | 791.3825         | 15 |
| 5  | 547.2511         | 274.1292        | 530.2245        | 265.6159         |                |                  | G    | 1484.7414        | <b>742.8743</b> | 1467.7148       | <b>734.3610</b>  | 1466.7308      | <b>733.8690</b>  | 14 |
| 6  | <b>648.2988</b>  | 324.6530        | <b>631.2722</b> | 316.1397         | 630.2882       | 315.6477         | T    | 1427.7199        | <b>714.3636</b> | 1410.6933       | 705.8503         | 1409.7093      | 705.3583         | 13 |
| 7  | 808.3294         | 404.6683        | 791.3029        | 396.1551         | 790.3189       | 395.6631         | C    | <b>1326.6722</b> | 663.8397        | 1309.6457       | 655.3265         | 1308.6616      | 654.8345         | 12 |
| 8  | 909.3771         | 455.1922        | 892.3505        | 446.6789         | 891.3665       | 446.1869         | T    | <b>1166.6416</b> | <b>583.8244</b> | 1149.6150       | 575.3111         | 1148.6310      | 574.8191         | 11 |
| 9  | 980.4142         | <b>490.7107</b> | 963.3877        | 482.1975         | 962.4036       | 481.7055         | A    | <b>1065.5939</b> | <b>533.3006</b> | 1048.5673       | 524.7873         | 1047.5833      | 524.2953         | 10 |
| 10 | <b>1109.4568</b> | 555.2320        | 1092.4303       | 546.7188         | 1091.4462      | 546.2268         | E    | <b>994.5568</b>  | 497.7820        | 977.5302        | 489.2687         | 976.5462       | 488.7767         | 9  |
| 11 | <b>1166.4783</b> | <b>583.7428</b> | 1149.4517       | 575.2295         | 1148.4677      | 574.7375         | G    | 865.5142         | <b>433.2607</b> | <b>848.4876</b> | 424.7475         | 847.5036       | 424.2554         | 8  |
| 12 | 1294.5732        | <b>647.7903</b> | 1277.5467       | 639.2770         | 1276.5627      | 638.7850         | K    | 808.4927         | 404.7500        | 791.4662        | 396.2367         | 790.4822       | 395.7447         | 7  |
| 13 | <b>1441.6416</b> | 721.3245        | 1424.6151       | 712.8112         | 1423.6311      | 712.3192         | F    | 680.3978         | 340.7025        | 663.3712        | 332.1892         | 662.3872       | 331.6972         | 6  |
| 14 | 1528.6737        | 764.8405        | 1511.6471       | 756.3272         | 1510.6631      | 755.8352         | S    | <b>533.3293</b>  | 267.1683        | 516.3028        | 258.6550         | 515.3188       | 258.1630         | 5  |
| 15 | 1627.7421        | 814.3747        | 1610.7155       | 805.8614         | 1609.7315      | 805.3694         | V    | 446.2973         | 223.6523        | 429.2708        | 215.1390         | 428.2867       | 214.6470         | 4  |
| 16 | 1714.7741        | <b>857.8907</b> | 1697.7476       | <b>849.3774</b>  | 1696.7635      | <b>848.8854</b>  | S    | <b>347.2289</b>  | 174.1181        | 330.2023        | 165.6048         | 329.2183       | 165.1128         | 3  |
| 17 | 1827.8582        | <b>914.4327</b> | 1810.8316       | <b>905.9195</b>  | 1809.8476      | <b>905.4274</b>  | L    | <b>260.1969</b>  | 130.6021        | 243.1703        | 122.0888         |                |                  | 2  |
| 18 |                  |                 |                 |                  |                |                  | K    | 147.1128         | 74.0600         | 130.0863        | 65.5468          |                |                  | 1  |

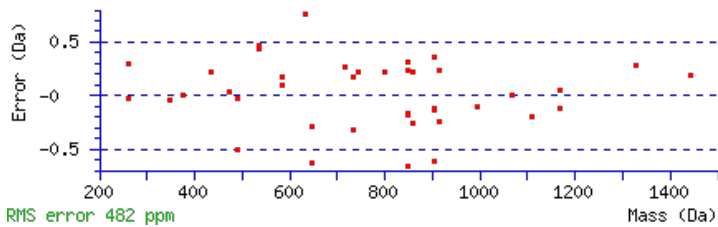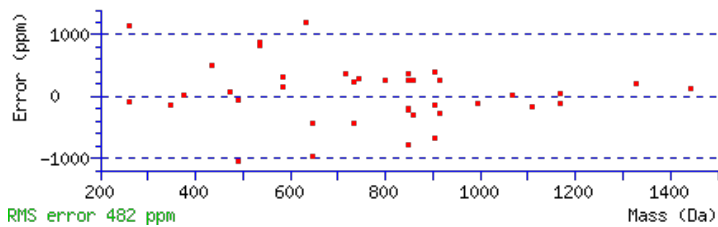

NCBI **BLAST** search of [FLNNGTCTAEGKFSVSLK](#)

(Parameters: blastp, nr protein database, expect=20000, no filter, PAM30)

Other BLAST [web gateways](#)

**All matches to this query**

| Score | Mr(calc)  | Delta   | Sequence                           | Site Analysis        |
|-------|-----------|---------|------------------------------------|----------------------|
| 36.5  | 1972.9564 | 0.0045  | <a href="#">FLNNGTCTAEGKFSVSLK</a> | Deamidated N4 50.06% |
| 36.5  | 1972.9564 | 0.0045  | <a href="#">FLNNGTCTAEGKFSVSLK</a> | Deamidated N3 49.94% |
| 14.6  | 1970.9594 | 2.0016  | <a href="#">QLYKLMSDMGQASGWIK</a>  |                      |
| 9.5   | 1971.9645 | 0.9964  | <a href="#">EMTLNKMOKSYQGALTK</a>  |                      |
| 9.0   | 1972.9564 | 0.0045  | <a href="#">NEYGPVLHMPTSKENLK</a>  |                      |
| 8.9   | 1972.9630 | -0.0020 | <a href="#">LLVQVLDVNDNDPEFDK</a>  |                      |
| 8.9   | 1972.9630 | -0.0020 | <a href="#">LLVQVLDVNDNDPEFDK</a>  |                      |
| 8.9   | 1972.9630 | -0.0020 | <a href="#">LLVQVLDVNDNDPEFDK</a>  |                      |
| 8.6   | 1972.9602 | 0.0007  | <a href="#">VDFTNHLEDTRRNINK</a>   |                      |
| 8.3   | 1971.9512 | 1.0097  | <a href="#">HRQAQEPWIGYDMVIK</a>   |                      |

Mascot: <http://www.matrixscience.com/>

# MASCOT SCIENCE Mascot Search Results

## Peptide View

MS/MS Fragmentation of **AFNSTLPTMAQMEK**

Found in **E7EPC6** in **con\_Xuniprot\_HUMAN3**, E7EPC6\_HUMAN CD44 antigen OS=Homo sapiens GN=CD44 PE=2 SV=2

Match to Query 7661: 1600.714648 from(801.364600,2+) intensity(3210.8350) rtinseconds(712) scans(1398) index(11587)

Title: 111019\_Est\_ISCardio\_NMI\_YS\_G\_8Spectrum1175\_scans\_\_1398

Data file C:\\mascot\\20140703\_Tmgf\_1D\\CSV\_UseAnalysis\\MasterCSV\\All\_Glyco\\mgf\\ptm\\UC18ERLIC\_PTM\_35D.mgf

Click mouse within plot area to zoom in by factor of two about that point

Or, to Da

Label all possible matches Label matches used for scoring

Show Y-axis

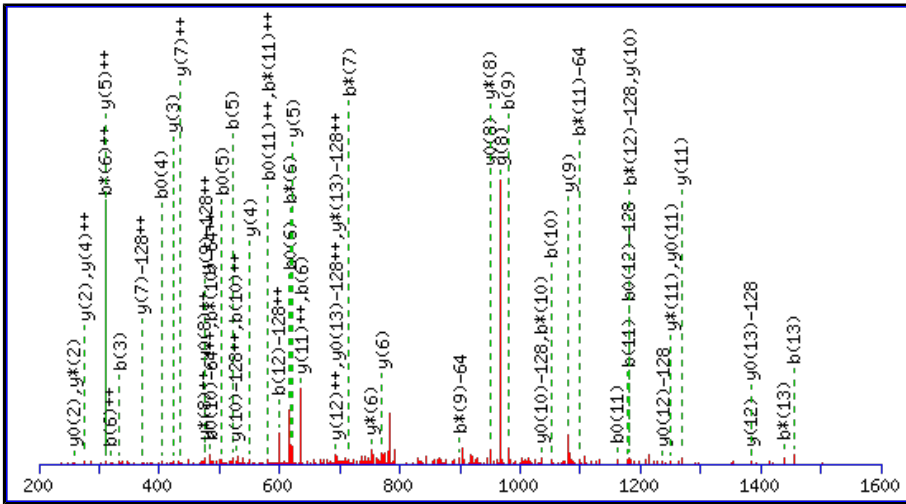

Monoisotopic mass of neutral peptide Mr(calc): 1600.7113

Fixed modifications: Carbamidomethyl (C) (apply to specified residues or termini only)

Variable modifications:

N3 : Deamidated (NQ)

M9 : Oxidation (M), with neutral losses 0.0000(shown in table), 63.9983

M12 : Oxidation (M), with neutral losses 0.0000(shown in table), 63.9983

Ions Score: 36 Expect: 0.028

Matches : 59/240 fragment ions using 119 most intense peaks ([help](#))

| #  | b                | b <sup>++</sup> | b <sup>*</sup>   | b <sup>*++</sup> | b <sup>0</sup>   | b <sup>0++</sup> | Seq. | y                | y <sup>++</sup> | y <sup>*</sup>   | y <sup>*++</sup> | y <sup>0</sup>   | y <sup>0++</sup> | #  |
|----|------------------|-----------------|------------------|------------------|------------------|------------------|------|------------------|-----------------|------------------|------------------|------------------|------------------|----|
| 1  | 72.0444          | 36.5258         |                  |                  |                  |                  | A    |                  |                 |                  |                  |                  |                  | 14 |
| 2  | 219.1128         | 110.0600        |                  |                  |                  |                  | F    | 1530.6815        | 765.8444        | 1513.6549        | 757.3311         | 1512.6709        | 756.8391         | 13 |
| 3  | <b>334.1397</b>  | 167.5735        | 317.1132         | 159.0602         |                  |                  | N    | <b>1383.6130</b> | <b>692.3102</b> | 1366.5865        | 683.7969         | 1365.6025        | 683.3049         | 12 |
| 4  | 421.1718         | 211.0895        | 404.1452         | 202.5763         | 403.1612         | 202.0842         | S    | <b>1268.5861</b> | <b>634.7967</b> | <b>1251.5596</b> | 626.2834         | <b>1250.5755</b> | 625.7914         | 11 |
| 5  | <b>522.2195</b>  | 261.6134        | 505.1929         | 253.1001         | <b>504.2089</b>  | 252.6081         | T    | <b>1181.5541</b> | 591.2807        | 1164.5275        | 582.7674         | 1163.5435        | 582.2754         | 10 |
| 6  | <b>635.3035</b>  | <b>318.1554</b> | <b>618.2770</b>  | <b>309.6421</b>  | <b>617.2930</b>  | 309.1501         | L    | <b>1080.5064</b> | 540.7568        | 1063.4798        | 532.2436         | 1062.4958        | 531.7516         | 9  |
| 7  | 732.3563         | 366.6818        | <b>715.3297</b>  | 358.1685         | 714.3457         | 357.6765         | P    | <b>967.4223</b>  | 484.2148        | <b>950.3958</b>  | <b>475.7015</b>  | <b>949.4118</b>  | <b>475.2095</b>  | 8  |
| 8  | 833.4040         | 417.2056        | 816.3774         | 408.6923         | 815.3934         | 408.2003         | T    | 870.3696         | <b>435.6884</b> | 853.3430         | 427.1751         | 852.3590         | 426.6831         | 7  |
| 9  | <b>980.4394</b>  | 490.7233        | 963.4128         | 482.2100         | 962.4288         | 481.7180         | M    | <b>769.3219</b>  | 385.1646        | <b>752.2953</b>  | 376.6513         | 751.3113         | 376.1593         | 6  |
| 10 | <b>1051.4765</b> | <b>526.2419</b> | <b>1034.4499</b> | 517.7286         | 1033.4659        | 517.2366         | A    | <b>622.2865</b>  | <b>311.6469</b> | 605.2599         | 303.1336         | 604.2759         | 302.6416         | 5  |
| 11 | <b>1179.5351</b> | 590.2712        | 1162.5085        | <b>581.7579</b>  | <b>1161.5245</b> | <b>581.2659</b>  | Q    | <b>551.2494</b>  | <b>276.1283</b> | 534.2228         | 267.6151         | 533.2388         | 267.1230         | 4  |
| 12 | 1326.5705        | 663.7889        | 1309.5439        | 655.2756         | 1308.5599        | 654.7836         | M    | <b>423.1908</b>  | 212.0990        | 406.1642         | 203.5858         | 405.1802         | 203.0938         | 3  |
| 13 | <b>1455.6130</b> | 728.3102        | <b>1438.5865</b> | 719.7969         | 1437.6025        | 719.3049         | E    | <b>276.1554</b>  | 138.5813        | <b>259.1288</b>  | 130.0681         | <b>258.1448</b>  | 129.5761         | 2  |
| 14 |                  |                 |                  |                  |                  |                  | K    | 147.1128         | 74.0600         | 130.0863         | 65.5468          |                  |                  | 1  |

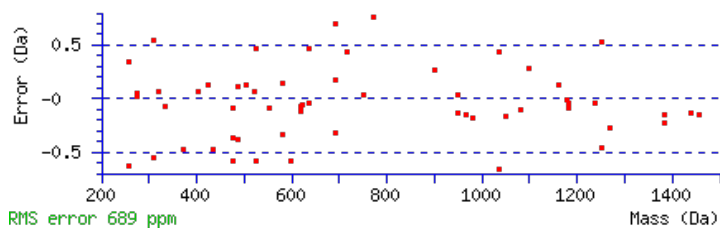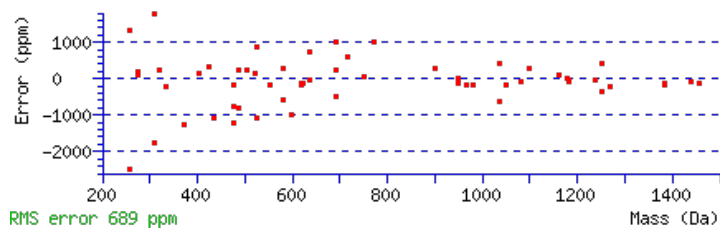

NCBI BLAST search of [AFNSTLPTMAQMEK](#)

(Parameters: blastp, nr protein database, expect=20000, no filter, PAM30)

Other BLAST [web gateways](#)

**All matches to this query**

| Score | Mr(calc)  | Delta   | Sequence                         | Site Analysis        |
|-------|-----------|---------|----------------------------------|----------------------|
| 35.7  | 1600.7113 | 0.0034  | <a href="#">AFNSTLPTMAQMEK</a>   | Deamidated N3 99.77% |
| 9.3   | 1600.7113 | 0.0034  | <a href="#">AFNSTLPTMAQMEK</a>   | Deamidated Q11 0.23% |
| 4.1   | 1600.7191 | -0.0045 | <a href="#">VNGPMPSFQPQEPR</a>   |                      |
| 2.7   | 1600.7079 | 0.0067  | <a href="#">IASFSQNCDIYPGK</a>   |                      |
| 2.7   | 1600.7077 | 0.0069  | <a href="#">QRQPREDGNEEDK</a>    |                      |
| 1.5   | 1598.7107 | 2.0040  | <a href="#">ACNPQPNGENAI SAR</a> |                      |
| 0.4   | 1600.7225 | -0.0079 | <a href="#">MFQIDQATKQCSK</a>    |                      |
| 0.2   | 1600.7104 | 0.0042  | <a href="#">DVSQSSIYSQTEEK</a>   |                      |
| 0.2   | 1600.7151 | -0.0004 | <a href="#">QTSRYSENACEKK</a>    |                      |
| 0.2   | 1600.7151 | -0.0004 | <a href="#">QTSRYSENACEKK</a>    |                      |

Mascot: <http://www.matrixscience.com/>

# MATRIX SCIENCE Mascot Search Results

## Peptide View

MS/MS Fragmentation of **AGPNGTLFVADAYK**

Found in **H0Y512** in **con\_Xuniprot\_HUMAN3**, H0Y512\_HUMAN Adipocyte plasma membrane-associated protein (Fragment) OS=Homo sapiens GN=APMAP PE=4 SV=1

Match to Query 3046: 1423.703028 from(712.858790,2+) intensity(168675.3438) rtinseconds(1282) scans(3108) index(5161)

Title: 111019\_Est\_ISCardio\_NMI\_YP\_G\_8Spectrum2703\_scans\_\_3108

Data file C:\\mascot\\20140703\_Tmfg\_1D\\CSV\_UseAnalysis\\MasterCSV\\All\_Glyco\\mgf\\ptm\\UC18ERLIC\_PTM\_35D.mgf

Click mouse within plot area to zoom in by factor of two about that point

Or, to Da

Label all possible matches Label matches used for scoring

Show Y-axis

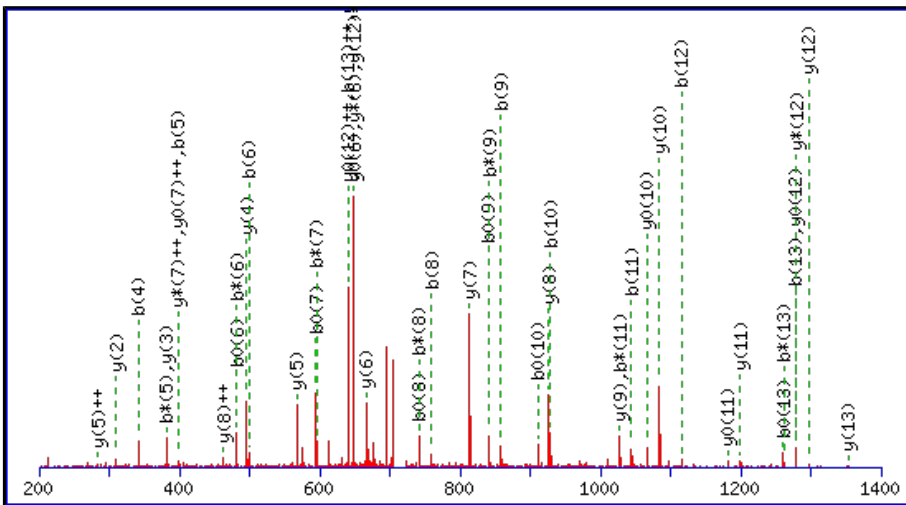

Monoisotopic mass of neutral peptide Mr(calc): 1423.6983

Fixed modifications: Carbamidomethyl (C) (apply to specified residues or termini only)

Variable modifications:

N4 : Deamidated (NQ)

Ions Score: 100 Expect: 2.2e-008

Matches : 48/134 fragment ions using 59 most intense peaks ([help](#))

| #  | b                | b <sup>++</sup> | b <sup>*</sup>   | b <sup>***</sup> | b <sup>0</sup>   | b <sup>0++</sup> | Seq. | y                | y <sup>++</sup> | y <sup>*</sup>   | y <sup>***</sup> | y <sup>0</sup>   | y <sup>0++</sup> | #  |
|----|------------------|-----------------|------------------|------------------|------------------|------------------|------|------------------|-----------------|------------------|------------------|------------------|------------------|----|
| 1  | 72.0444          | 36.5258         |                  |                  |                  |                  | A    |                  |                 |                  |                  |                  |                  | 14 |
| 2  | 129.0659         | 65.0366         |                  |                  |                  |                  | G    | <b>1353.6685</b> | 677.3379        | 1336.6420        | 668.8246         | 1335.6579        | 668.3326         | 13 |
| 3  | 226.1186         | 113.5629        |                  |                  |                  |                  | P    | <b>1296.6470</b> | <b>648.8272</b> | <b>1279.6205</b> | <b>640.3139</b>  | <b>1278.6365</b> | <b>639.8219</b>  | 12 |
| 4  | <b>341.1456</b>  | 171.0764        | 324.1190         | 162.5631         |                  |                  | N    | <b>1199.5943</b> | 600.3008        | 1182.5677        | 591.7875         | <b>1181.5837</b> | 591.2955         | 11 |
| 5  | <b>398.1670</b>  | 199.5872        | <b>381.1405</b>  | 191.0739         |                  |                  | G    | <b>1084.5673</b> | 542.7873        | 1067.5408        | 534.2740         | <b>1066.5568</b> | 533.7820         | 10 |
| 6  | <b>499.2147</b>  | 250.1110        | <b>482.1882</b>  | 241.5977         | <b>481.2041</b>  | 241.1057         | T    | <b>1027.5459</b> | 514.2766        | 1010.5193        | 505.7633         | 1009.5353        | 505.2713         | 9  |
| 7  | 612.2988         | 306.6530        | <b>595.2722</b>  | 298.1397         | <b>594.2882</b>  | 297.6477         | L    | <b>926.4982</b>  | <b>463.7527</b> | 909.4716         | 455.2395         | 908.4876         | 454.7475         | 8  |
| 8  | <b>759.3672</b>  | 380.1872        | <b>742.3406</b>  | 371.6740         | <b>741.3566</b>  | 371.1819         | F    | <b>813.4141</b>  | 407.2107        | 796.3876         | <b>398.6974</b>  | 795.4036         | <b>398.2054</b>  | 7  |
| 9  | <b>858.4356</b>  | 429.7214        | <b>841.4090</b>  | 421.2082         | <b>840.4250</b>  | 420.7162         | V    | <b>666.3457</b>  | 333.6765        | <b>649.3192</b>  | 325.1632         | <b>648.3352</b>  | 324.6712         | 6  |
| 10 | <b>929.4727</b>  | 465.2400        | 912.4462         | 456.7267         | <b>911.4621</b>  | 456.2347         | A    | <b>567.2773</b>  | <b>284.1423</b> | 550.2508         | 275.6290         | 549.2667         | 275.1370         | 5  |
| 11 | <b>1044.4997</b> | 522.7535        | <b>1027.4731</b> | 514.2402         | 1026.4891        | 513.7482         | D    | <b>496.2402</b>  | 248.6237        | 479.2136         | 240.1105         | 478.2296         | 239.6185         | 4  |
| 12 | <b>1115.5368</b> | 558.2720        | 1098.5102        | 549.7587         | 1097.5262        | 549.2667         | A    | <b>381.2132</b>  | 191.1103        | 364.1867         | 182.5970         |                  |                  | 3  |
| 13 | <b>1278.6001</b> | <b>639.8037</b> | <b>1261.5735</b> | 631.2904         | <b>1260.5895</b> | 630.7984         | Y    | <b>310.1761</b>  | 155.5917        | 293.1496         | 147.0784         |                  |                  | 2  |
| 14 |                  |                 |                  |                  |                  |                  | K    | 147.1128         | 74.0600         | 130.0863         | 65.5468          |                  |                  | 1  |



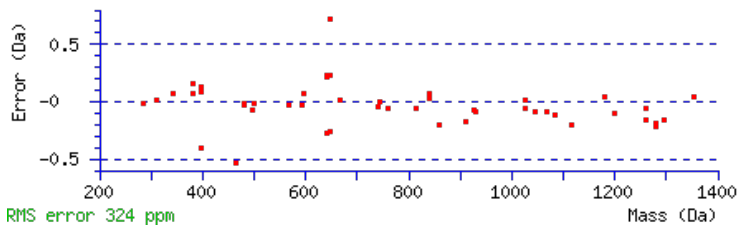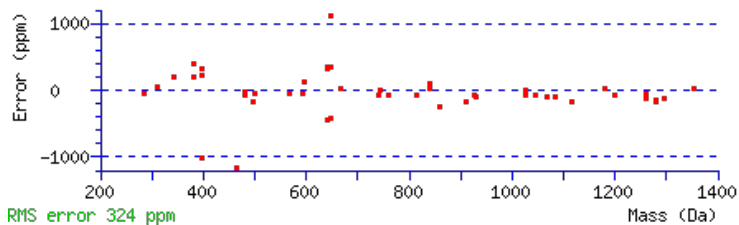

NCBI BLAST search of [AGPNGTLFVADAYK](#)

(Parameters: blastp, nr protein database, expect=20000, no filter, PAM30)

Other BLAST [web gateways](#)

All matches to this query

| Score | Mr(calc)  | Delta   | Sequence                        |
|-------|-----------|---------|---------------------------------|
| 99.7  | 1423.6983 | 0.0047  | <a href="#">AGPNGTLFVADAYK</a>  |
| 7.9   | 1423.6977 | 0.0053  | <a href="#">QVLGSSRQTLSTM</a>   |
| 7.6   | 1423.7069 | -0.0039 | <a href="#">WPGSAGQGAGGRAPR</a> |
| 7.1   | 1423.6983 | 0.0047  | <a href="#">KPDEIEGWEPPK</a>    |
| 5.8   | 1423.7017 | 0.0013  | <a href="#">QQIQIMDEIYK</a>     |
| 4.8   | 1423.7055 | -0.0025 | <a href="#">DPGSPRGAEEPGKK</a>  |
| 4.2   | 1423.6958 | 0.0072  | <a href="#">AYLMFDFRAYK</a>     |
| 3.0   | 1421.6998 | 2.0033  | <a href="#">AETETEISTRASK</a>   |
| 1.0   | 1423.7017 | 0.0013  | <a href="#">MPISLLQEYGTR</a>    |
| 0.3   | 1423.7096 | -0.0065 | <a href="#">HQSLSTYNFSK</a>     |

Mascot: <http://www.matrixscience.com/>

# MASCOT SCIENCE Mascot Search Results

## Peptide View

MS/MS Fragmentation of **LLLSSETPIEGKNMSFVNDLTVTQDGR**

Found in **H0Y512** in **con\_Xuniprot\_HUMAN3**, H0Y512\_HUMAN Adipocyte plasma membrane-associated protein (Fragment) OS=Homo sapiens  
GN=APMAP PE=4 SV=1

Match to Query 27083: 2982.491052 from(995.170960,3+) intensity(15082.6826) rtinseconds(1830) scans(4668) index(24632)

Title: 111019\_Est\_MI\_YS\_G\_06Spectrum4054\_scans\_4668

Data file C:\mascot\20140703\_Tmgf\_1D\CSV\_UseAnalysis\MasterCSV\All\_Glyco\mgf\ptm\UC18ERLIC\_PTM\_35D.mgf

Click mouse within plot area to zoom in by factor of two about that point

Or, to Da

Label all possible matches Label matches used for scoring

Show Y-axis

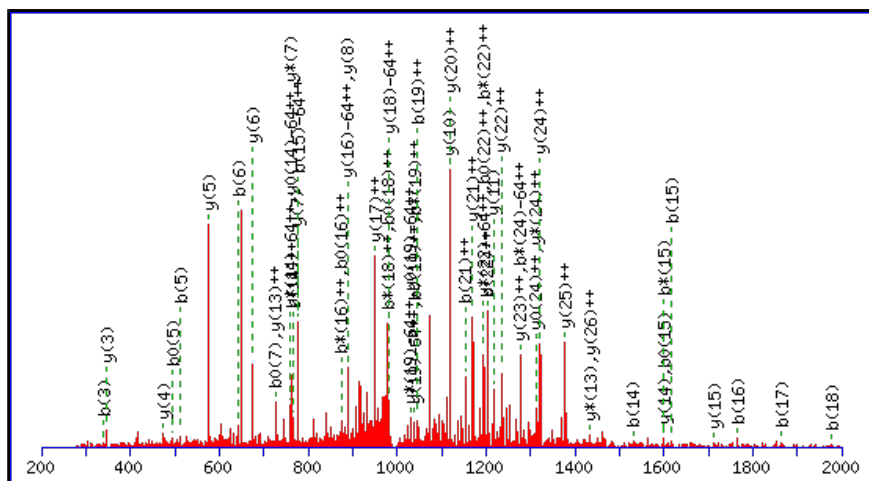

Monoisotopic mass of neutral peptide Mr(calc): 2980.4699

Fixed modifications: Carbamidomethyl (C) (apply to specified residues or termini only)

Variable modifications:

N13 : Deamidated (NQ)

M14 : Oxidation (M), with neutral losses 0.0000(shown in table), 63.9983

Ions Score: 53 Expect: 0.0012

Matches : 57/436 fragment ions using 105 most intense peaks ([help](#))

| #  | b         | b <sup>++</sup> | b <sup>*</sup> | b <sup>*++</sup> | b <sup>0</sup> | b <sup>0++</sup> | Seq. | y         | y <sup>++</sup> | y <sup>*</sup> | y <sup>*++</sup> | y <sup>0</sup> | y <sup>0++</sup> | #  |
|----|-----------|-----------------|----------------|------------------|----------------|------------------|------|-----------|-----------------|----------------|------------------|----------------|------------------|----|
| 1  | 114.0913  | 57.5493         |                |                  |                |                  | L    |           |                 |                |                  |                |                  | 27 |
| 2  | 227.1754  | 114.0913        |                |                  |                |                  | L    | 2868.3931 | 1434.7002       | 2851.3666      | 1426.1869        | 2850.3826      | 1425.6949        | 26 |
| 3  | 340.2595  | 170.6334        |                |                  |                |                  | L    | 2755.3091 | 1378.1582       | 2738.2825      | 1369.6449        | 2737.2985      | 1369.1529        | 25 |
| 4  | 427.2915  | 214.1494        |                |                  | 409.2809       | 205.1441         | S    | 2642.2250 | 1321.6161       | 2625.1985      | 1313.1029        | 2624.2145      | 1312.6109        | 24 |
| 5  | 514.3235  | 257.6654        |                |                  | 496.3130       | 248.6601         | S    | 2555.1930 | 1278.1001       | 2538.1664      | 1269.5869        | 2537.1824      | 1269.0949        | 23 |
| 6  | 643.3661  | 322.1867        |                |                  | 625.3556       | 313.1814         | E    | 2468.1610 | 1234.5841       | 2451.1344      | 1226.0708        | 2450.1504      | 1225.5788        | 22 |
| 7  | 744.4138  | 372.7105        |                |                  | 726.4032       | 363.7053         | T    | 2339.1184 | 1170.0628       | 2322.0918      | 1161.5495        | 2321.1078      | 1161.0575        | 21 |
| 8  | 841.4666  | 421.2369        |                |                  | 823.4560       | 412.2316         | P    | 2238.0707 | 1119.5390       | 2221.0441      | 1111.0257        | 2220.0601      | 1110.5337        | 20 |
| 9  | 954.5506  | 477.7790        |                |                  | 936.5401       | 468.7737         | I    | 2141.0179 | 1071.0126       | 2123.9914      | 1062.4993        | 2123.0074      | 1062.0073        | 19 |
| 10 | 1083.5932 | 542.3002        |                |                  | 1065.5827      | 533.2950         | E    | 2027.9339 | 1014.4706       | 2010.9073      | 1005.9573        | 2009.9233      | 1005.4653        | 18 |
| 11 | 1140.6147 | 570.8110        |                |                  | 1122.6041      | 561.8057         | G    | 1898.8913 | 949.9493        | 1881.8647      | 941.4360         | 1880.8807      | 940.9440         | 17 |
| 12 | 1268.7096 | 634.8585        | 1251.6831      | 626.3452         | 1250.6991      | 625.8532         | K    | 1841.8698 | 921.4385        | 1824.8433      | 912.9253         | 1823.8592      | 912.4333         | 16 |
| 13 | 1383.7366 | 692.3719        | 1366.7100      | 683.8587         | 1365.7260      | 683.3666         | N    | 1713.7748 | 857.3911        | 1696.7483      | 848.8778         | 1695.7643      | 848.3858         | 15 |
| 14 | 1530.7720 | 765.8896        | 1513.7454      | 757.3764         | 1512.7614      | 756.8843         | M    | 1598.7479 | 799.8776        | 1581.7213      | 791.3643         | 1580.7373      | 790.8723         | 14 |
| 15 | 1617.8040 | 809.4056        | 1600.7775      | 800.8924         | 1599.7935      | 800.4004         | S    | 1451.7125 | 726.3599        | 1434.6859      | 717.8466         | 1433.7019      | 717.3546         | 13 |
| 16 | 1764.8724 | 882.9399        | 1747.8459      | 874.4266         | 1746.8619      | 873.9346         | F    | 1364.6805 | 682.8439        | 1347.6539      | 674.3306         | 1346.6699      | 673.8386         | 12 |
| 17 | 1863.9408 | 932.4741        | 1846.9143      | 923.9608         | 1845.9303      | 923.4688         | V    | 1217.6121 | 609.3097        | 1200.5855      | 600.7964         | 1199.6015      | 600.3044         | 11 |
| 18 | 1977.9838 | 989.4955        | 1960.9572      | 980.9822         | 1959.9732      | 980.4902         | N    | 1118.5436 | 559.7755        | 1101.5171      | 551.2622         | 1100.5331      | 550.7702         | 10 |
| 19 | 2093.0107 | 1047.0090       | 2075.9842      | 1038.4957        | 2075.0001      | 1038.0037        | D    | 1004.5007 | 502.7540        | 987.4742       | 494.2407         | 986.4902       | 493.7487         | 9  |
| 20 | 2206.0948 | 1103.5510       | 2189.0682      | 1095.0378        | 2188.0842      | 1094.5457        | L    | 889.4738  | 445.2405        | 872.4472       | 436.7272         | 871.4632       | 436.2352         | 8  |
| 21 | 2307.1425 | 1154.0749       | 2290.1159      | 1145.5616        | 2289.1319      | 1145.0696        | T    | 776.3897  | 388.6985        | 759.3632       | 380.1852         | 758.3791       | 379.6932         | 7  |

|    |           |                  |           |                  |           |                  |   |                 |          |          |          |          |          |   |
|----|-----------|------------------|-----------|------------------|-----------|------------------|---|-----------------|----------|----------|----------|----------|----------|---|
| 22 | 2406.2109 | <b>1203.6091</b> | 2389.1843 | <b>1195.0958</b> | 2388.2003 | <b>1194.6038</b> | V | <b>675.3420</b> | 338.1747 | 658.3155 | 329.6614 | 657.3315 | 329.1694 | 6 |
| 23 | 2507.2585 | 1254.1329        | 2490.2320 | 1245.6196        | 2489.2480 | 1245.1276        | T | <b>576.2736</b> | 288.6404 | 559.2471 | 280.1272 | 558.2631 | 279.6352 | 5 |
| 24 | 2635.3171 | 1318.1622        | 2618.2906 | 1309.6489        | 2617.3066 | 1309.1569        | Q | <b>475.2259</b> | 238.1166 | 458.1994 | 229.6033 | 457.2154 | 229.1113 | 4 |
| 25 | 2750.3441 | 1375.6757        | 2733.3175 | 1367.1624        | 2732.3335 | 1366.6704        | D | <b>347.1674</b> | 174.0873 | 330.1408 | 165.5740 | 329.1568 | 165.0820 | 3 |
| 26 | 2807.3655 | 1404.1864        | 2790.3390 | 1395.6731        | 2789.3550 | 1395.1811        | G | 232.1404        | 116.5738 | 215.1139 | 108.0606 |          |          | 2 |
| 27 |           |                  |           |                  |           |                  | R | 175.1190        | 88.0631  | 158.0924 | 79.5498  |          |          | 1 |

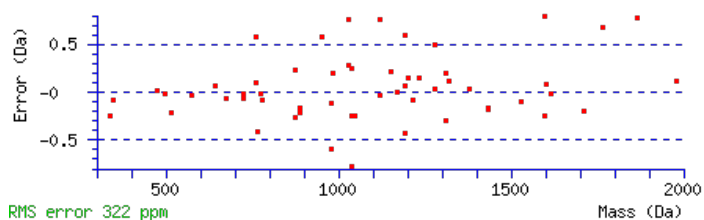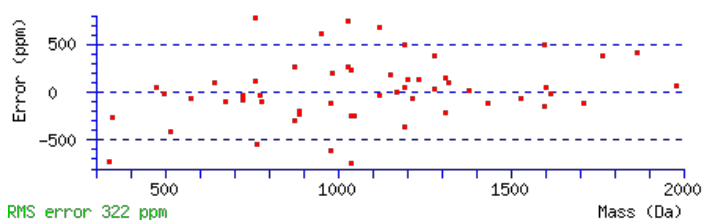

NCBI BLAST search of [LLLSSETPIEGKNMSFVNDLTVTQDGR](#)

(Parameters: blastp, nr protein database, expect=20000, no filter, PAM30)

Other BLAST [web gateways](#)

All matches to this query

| Score | Mr(calc)  | Delta   | Sequence                                     | Site Analysis         |
|-------|-----------|---------|----------------------------------------------|-----------------------|
| 53.4  | 2980.4699 | 2.0211  | <a href="#">LLLSSETPIEGKNMSFVNDLTVTQDGR</a>  | Deamidated N13 91.39% |
| 42.1  | 2980.4699 | 2.0211  | <a href="#">LLLSSETPIEGKNMSFVNDLTVTQDGR</a>  | Deamidated N18 6.77%  |
| 36.4  | 2980.4699 | 2.0211  | <a href="#">LLLSSETPIEGKNMSFVNDLTVTQDGR</a>  | Deamidated Q24 1.84%  |
| 5.3   | 2982.4830 | 0.0080  | <a href="#">KDMLFNQLIEMALLSLGYSHSSAAQAK</a>  |                       |
| 3.6   | 2980.4925 | 1.9985  | <a href="#">LMYNSSNPVLKNMWPEGKLSITEVTK</a>   |                       |
| 3.1   | 2980.4925 | 1.9985  | <a href="#">LMYNSSNPVLKNMWPEGKLSITEVTK</a>   |                       |
| 3.1   | 2980.4925 | 1.9985  | <a href="#">LMYNSSNPVLKNMWPEGKLSITEVTK</a>   |                       |
| 1.8   | 2982.5008 | -0.0097 | <a href="#">IPHTPPLETMAIDSAAKYAVLSNEAAEK</a> |                       |
| 1.1   | 2981.4765 | 1.0145  | <a href="#">LMYNSSNPVLKNMWPEGKLSITEVTK</a>   |                       |
| 0.9   | 2982.4929 | -0.0018 | <a href="#">RQYKLMEPNEIVATSLQAETMIALSK</a>   |                       |

Mascot: <http://www.matrixscience.com/>

# MATRIX SCIENCE Mascot Search Results

## Peptide View

MS/MS Fragmentation of **SVVAPATDGGLNLTSTFLR**

Found in **F8W7I2** in **con\_Xuniprot\_HUMAN3**, F8W7I2\_HUMAN Prostaglandin-H2 D-isomerase OS=Homo sapiens GN=PTGDS PE=2 SV=1

Match to Query 11612: 1919.004988 from(960.509770,2+) intensity(30677.5527) rtinseconds(2074) scans(5480) index(4561)

Title: 111019\_Est\_ISCardio\_NMI\_YP\_G\_7Spectrum4653\_scans\_\_5480

Data file C:\\mascot\\20140703\_Tmgf\_1D\\CSV\_UseAnalysis\\MasterCSV\\All\_Glyco\\mgf\\ptm\\UC18ERLIC\_PTM\_35D.mgf

Click mouse within plot area to zoom in by factor of two about that point

Or, to Da

Label all possible matches Label matches used for scoring

Show Y-axis

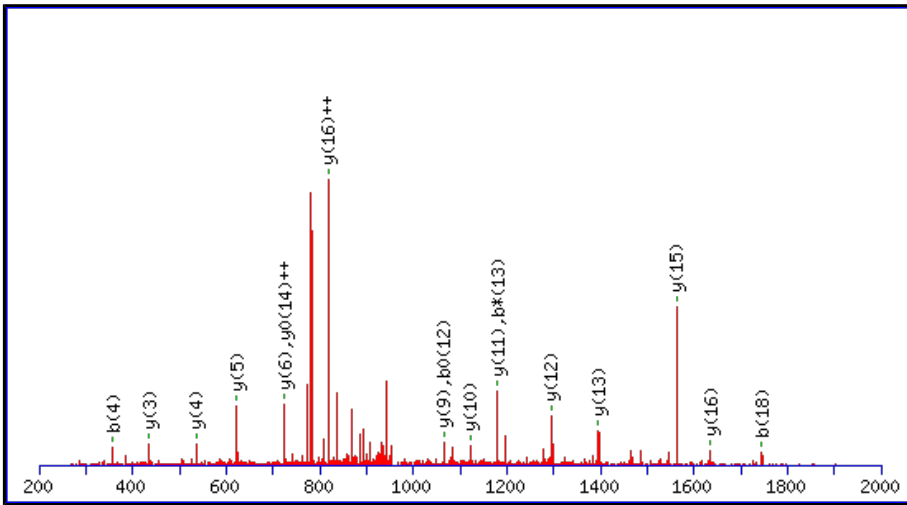

Monoisotopic mass of neutral peptide Mr(calc): 1919.0000

Fixed modifications: Carbamidomethyl (C) (apply to specified residues or termini only)

Variable modifications:

N12 : Deamidated (NQ)

Ions Score: 101 Expect: 1.7e-008

Matches : 17/188 fragment ions using 17 most intense peaks ([help](#))

| #  | b                | b <sup>++</sup> | b <sup>*</sup>   | b <sup>***</sup> | b <sup>0</sup>   | b <sup>0++</sup> | Seq. | y                | y <sup>++</sup> | y <sup>*</sup> | y <sup>***</sup> | y <sup>0</sup> | y <sup>0++</sup> | #  |
|----|------------------|-----------------|------------------|------------------|------------------|------------------|------|------------------|-----------------|----------------|------------------|----------------|------------------|----|
| 1  | 88.0393          | 44.5233         |                  |                  | 70.0287          | 35.5180          | S    |                  |                 |                |                  |                |                  | 19 |
| 2  | 187.1077         | 94.0575         |                  |                  | 169.0972         | 85.0522          | V    | 1832.9753        | 916.9913        | 1815.9487      | 908.4780         | 1814.9647      | 907.9860         | 18 |
| 3  | 286.1761         | 143.5917        |                  |                  | 268.1656         | 134.5864         | V    | 1733.9068        | 867.4571        | 1716.8803      | 858.9438         | 1715.8963      | 858.4518         | 17 |
| 4  | <b>357.2132</b>  | 179.1103        |                  |                  | 339.2027         | 170.1050         | A    | <b>1634.8384</b> | <b>817.9229</b> | 1617.8119      | 809.4096         | 1616.8279      | 808.9176         | 16 |
| 5  | 454.2660         | 227.6366        |                  |                  | 436.2554         | 218.6314         | P    | <b>1563.8013</b> | 782.4043        | 1546.7748      | 773.8910         | 1545.7908      | 773.3990         | 15 |
| 6  | 525.3031         | 263.1552        |                  |                  | 507.2926         | 254.1499         | A    | 1466.7486        | 733.8779        | 1449.7220      | 725.3646         | 1448.7380      | <b>724.8726</b>  | 14 |
| 7  | 626.3508         | 313.6790        |                  |                  | 608.3402         | 304.6738         | T    | <b>1395.7114</b> | 698.3594        | 1378.6849      | 689.8461         | 1377.7009      | 689.3541         | 13 |
| 8  | 741.3777         | 371.1925        |                  |                  | 723.3672         | 362.1872         | D    | <b>1294.6638</b> | 647.8355        | 1277.6372      | 639.3222         | 1276.6532      | 638.8302         | 12 |
| 9  | 798.3992         | 399.7032        |                  |                  | 780.3886         | 390.6980         | G    | <b>1179.6368</b> | 590.3220        | 1162.6103      | 581.8088         | 1161.6263      | 581.3168         | 11 |
| 10 | 855.4207         | 428.2140        |                  |                  | 837.4101         | 419.2087         | G    | <b>1122.6154</b> | 561.8113        | 1105.5888      | 553.2980         | 1104.6048      | 552.8060         | 10 |
| 11 | 968.5047         | 484.7560        |                  |                  | 950.4942         | 475.7507         | L    | <b>1065.5939</b> | 533.3006        | 1048.5673      | 524.7873         | 1047.5833      | 524.2953         | 9  |
| 12 | 1083.5317        | 542.2695        | 1066.5051        | 533.7562         | <b>1065.5211</b> | 533.2642         | N    | 952.5098         | 476.7585        | 935.4833       | 468.2453         | 934.4993       | 467.7533         | 8  |
| 13 | 1196.6157        | 598.8115        | <b>1179.5892</b> | 590.2982         | 1178.6052        | 589.8062         | L    | 837.4829         | 419.2451        | 820.4563       | 410.7318         | 819.4723       | 410.2398         | 7  |
| 14 | 1297.6634        | 649.3354        | 1280.6369        | 640.8221         | 1279.6529        | 640.3301         | T    | <b>724.3988</b>  | 362.7030        | 707.3723       | 354.1898         | 706.3883       | 353.6978         | 6  |
| 15 | 1384.6955        | 692.8514        | 1367.6689        | 684.3381         | 1366.6849        | 683.8461         | S    | <b>623.3511</b>  | 312.1792        | 606.3246       | 303.6659         | 605.3406       | 303.1739         | 5  |
| 16 | 1485.7431        | 743.3752        | 1468.7166        | 734.8619         | 1467.7326        | 734.3699         | T    | <b>536.3191</b>  | 268.6632        | 519.2926       | 260.1499         | 518.3085       | 259.6579         | 4  |
| 17 | 1632.8115        | 816.9094        | 1615.7850        | 808.3961         | 1614.8010        | 807.9041         | F    | <b>435.2714</b>  | 218.1394        | 418.2449       | 209.6261         |                |                  | 3  |
| 18 | <b>1745.8956</b> | 873.4514        | 1728.8691        | 864.9382         | 1727.8850        | 864.4462         | L    | 288.2030         | 144.6051        | 271.1765       | 136.0919         |                |                  | 2  |
| 19 |                  |                 |                  |                  |                  |                  | R    | 175.1190         | 88.0631         | 158.0924       | 79.5498          |                |                  | 1  |

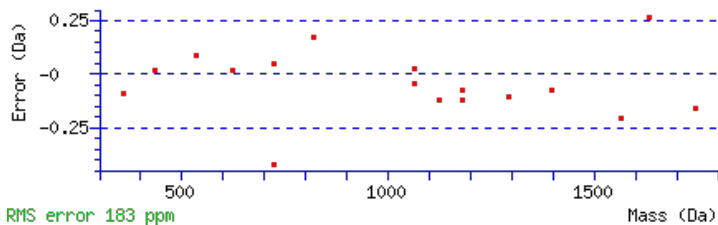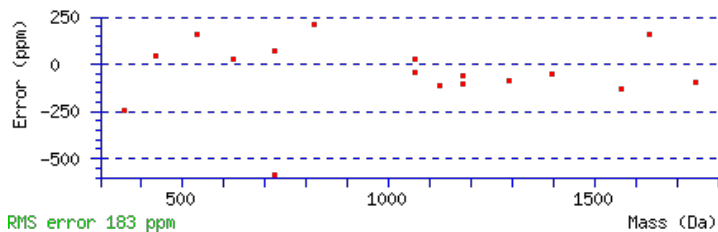

NCBI **BLAST** search of [SVVAPATDGGLNLTSTFLR](#)  
 (Parameters: blastp, nr protein database, expect=20000, no filter, PAM30)  
 Other BLAST [web gateways](#)

**All matches to this query**

| Score | Mr(calc)  | Delta   | Sequence                            |
|-------|-----------|---------|-------------------------------------|
| 100.8 | 1919.0000 | 0.0050  | <a href="#">SVVAPATDGGLNLTSTFLR</a> |
| 9.2   | 1918.0094 | 0.9956  | <a href="#">RQANQIGHGEPMIKPLK</a>   |
| 5.3   | 1919.0013 | 0.0037  | <a href="#">ERAIFKVHSDFTAAATR</a>   |
| 4.9   | 1918.0094 | 0.9956  | <a href="#">RQANQIGHGEPMIKPLK</a>   |
| 1.8   | 1918.0094 | 0.9956  | <a href="#">RQANQIGHGEPMIKPLK</a>   |
| 1.3   | 1916.9890 | 2.0160  | <a href="#">LENIQNCLQKLHAAHK</a>    |
| 1.3   | 1916.9890 | 2.0160  | <a href="#">LENIQNCLQKLHAAHK</a>    |
| 1.3   | 1916.9890 | 2.0160  | <a href="#">LENIQNCLQKLHAAHK</a>    |
| 0.8   | 1918.9968 | 0.0082  | <a href="#">KGLLLTNQNLRMATAQM</a>   |
| 0.4   | 1919.0074 | -0.0024 | <a href="#">ERFQIPLVMTDALQK</a>     |

Mascot: <http://www.matrixscience.com/>

# MASCOT SCIENCE Mascot Search Results

## Peptide View

MS/MS Fragmentation of **WFSAGLASNSSWLR**

Found in **F8W7I2** in **con\_Xuniprot\_HUMAN3**, F8W7I2\_HUMAN Prostaglandin-H2 D-isomerase OS=Homo sapiens GN=PTGDS PE=2 SV=1

Match to Query 7575: 1581.764228 from(791.889390,2+) intensity(24533.7910) rtinseconds(2175) scans(5368) index(26210)

Title: 111019\_Est\_MI\_YS\_G\_08Spectrum4649\_scans\_5368

Data file C:\\mascot\\20140703\_Tmgf\_1D\\CSV\_UseAnalysis\\MasterCSV\\All\_Glyco\\mgf\\ptm\\UC18ERLIC\_PTM\_35D.mgf

Click mouse within plot area to zoom in by factor of two about that point

Or, to Da

Label all possible matches Label matches used for scoring

Show Y-axis

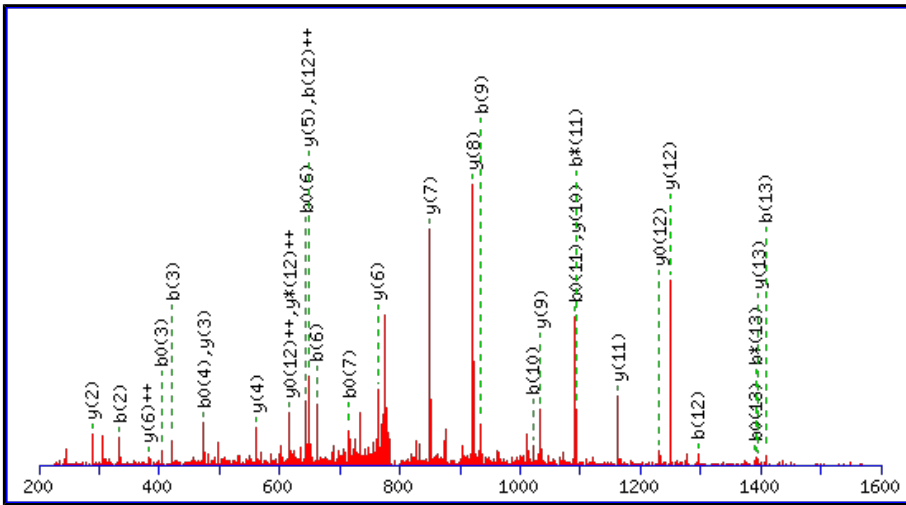

Monoisotopic mass of neutral peptide Mr(calc): 1581.7576

Fixed modifications: Carbamidomethyl (C) (apply to specified residues or termini only)

Variable modifications:

N9 : Deamidated (NQ)

Ions Score: 77 Expect: 4.2e-006

Matches : 32/130 fragment ions using 56 most intense peaks ([help](#))

| #  | b                | b <sup>++</sup> | b <sup>*</sup>   | b <sup>***</sup> | b <sup>0</sup>   | b <sup>0++</sup> | Seq. | y                | y <sup>++</sup> | y <sup>*</sup> | y <sup>***</sup> | y <sup>0</sup>   | y <sup>0++</sup> | #  |
|----|------------------|-----------------|------------------|------------------|------------------|------------------|------|------------------|-----------------|----------------|------------------|------------------|------------------|----|
| 1  | 187.0866         | 94.0469         |                  |                  |                  |                  | W    |                  |                 |                |                  |                  |                  | 14 |
| 2  | <b>334.1550</b>  | 167.5811        |                  |                  |                  |                  | F    | <b>1396.6856</b> | 698.8464        | 1379.6590      | 690.3331         | 1378.6750        | 689.8411         | 13 |
| 3  | <b>421.1870</b>  | 211.0972        |                  |                  | 403.1765         | 202.0919         | S    | <b>1249.6171</b> | 625.3122        | 1232.5906      | <b>616.7989</b>  | <b>1231.6066</b> | <b>616.3069</b>  | 12 |
| 4  | 492.2241         | 246.6157        |                  |                  | <b>474.2136</b>  | 237.6104         | A    | <b>1162.5851</b> | 581.7962        | 1145.5586      | 573.2829         | 1144.5745        | 572.7909         | 11 |
| 5  | 549.2456         | 275.1264        |                  |                  | 531.2350         | 266.1212         | G    | <b>1091.5480</b> | 546.2776        | 1074.5214      | 537.7644         | 1073.5374        | 537.2724         | 10 |
| 6  | <b>662.3297</b>  | 331.6685        |                  |                  | <b>644.3191</b>  | 322.6632         | L    | <b>1034.5265</b> | 517.7669        | 1017.5000      | 509.2536         | 1016.5160        | 508.7616         | 9  |
| 7  | 733.3668         | 367.1870        |                  |                  | <b>715.3562</b>  | 358.1817         | A    | <b>921.4425</b>  | 461.2249        | 904.4159       | 452.7116         | 903.4319         | 452.2196         | 8  |
| 8  | 820.3988         | 410.7030        |                  |                  | 802.3882         | 401.6978         | S    | <b>850.4054</b>  | 425.7063        | 833.3788       | 417.1930         | 832.3948         | 416.7010         | 7  |
| 9  | <b>935.4258</b>  | 468.2165        | 918.3992         | 459.7032         | 917.4152         | 459.2112         | N    | <b>763.3733</b>  | <b>382.1903</b> | 746.3468       | 373.6770         | 745.3628         | 373.1850         | 6  |
| 10 | <b>1022.4578</b> | 511.7325        | 1005.4312        | 503.2193         | 1004.4472        | 502.7272         | S    | <b>648.3464</b>  | 324.6768        | 631.3198       | 316.1636         | 630.3358         | 315.6715         | 5  |
| 11 | 1109.4898        | 555.2485        | <b>1092.4633</b> | 546.7353         | <b>1091.4792</b> | 546.2433         | S    | <b>561.3144</b>  | 281.1608        | 544.2878       | 272.6475         | 543.3038         | 272.1555         | 4  |
| 12 | <b>1295.5691</b> | <b>648.2882</b> | 1278.5426        | 639.7749         | 1277.5586        | 639.2829         | W    | <b>474.2823</b>  | 237.6448        | 457.2558       | 229.1315         |                  |                  | 3  |
| 13 | <b>1408.6532</b> | 704.8302        | <b>1391.6266</b> | 696.3170         | <b>1390.6426</b> | 695.8250         | L    | <b>288.2030</b>  | 144.6051        | 271.1765       | 136.0919         |                  |                  | 2  |
| 14 |                  |                 |                  |                  |                  |                  | R    | 175.1190         | 88.0631         | 158.0924       | 79.5498          |                  |                  | 1  |

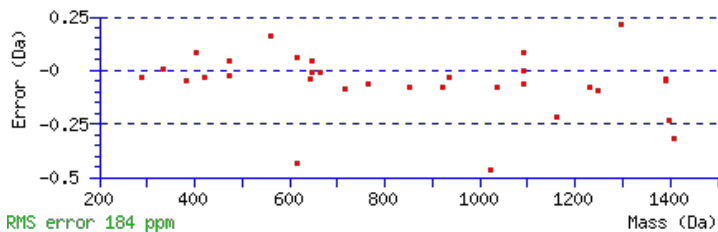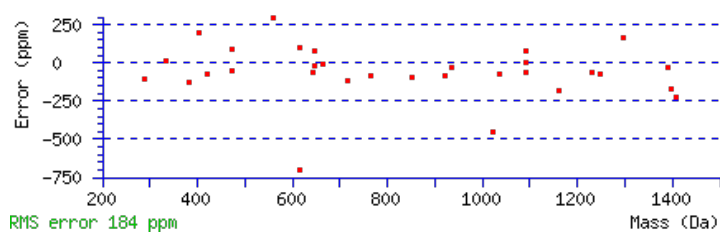

NCBI BLAST search of [WFSAGLASNSSWLR](#)

(Parameters: blastp, nr protein database, expect=20000, no filter, PAM30)

Other BLAST [web gateways](#)

**All matches to this query**

| Score | Mr(calc)  | Delta   | Sequence                        |
|-------|-----------|---------|---------------------------------|
| 76.8  | 1581.7576 | 0.0067  | <a href="#">WFSAGLASNSSWLR</a>  |
| 8.5   | 1580.7617 | 1.0026  | <a href="#">DAFSAQMVKNTVNR</a>  |
| 7.7   | 1580.7617 | 1.0026  | <a href="#">DAFSAQMVKNTVNR</a>  |
| 5.4   | 1580.7617 | 1.0026  | <a href="#">DAFSAQMVKNTVNR</a>  |
| 3.2   | 1581.7708 | -0.0066 | <a href="#">YGLVTNEIAMVQAR</a>  |
| 3.0   | 1581.7610 | 0.0033  | <a href="#">MSVGLFASQRQWGV</a>  |
| 2.8   | 1580.7682 | 0.9960  | <a href="#">VSTSVSAQPSYAVER</a> |
| 2.6   | 1580.7623 | 1.0019  | <a href="#">FWSQISQGHLSYK</a>   |
| 2.4   | 1579.7624 | 2.0019  | <a href="#">AAMDSRASDAINKSK</a> |
| 2.0   | 1581.7569 | 0.0073  | <a href="#">MSAKNNEERFVNK</a>   |

Mascot: <http://www.matrixscience.com/>



# MATRIX SCIENCE Mascot Search Results

## Peptide View

MS/MS Fragmentation of **IYSGILNLSDITK**

Found in **E9PBC5** in **con\_Xuniprot\_HUMAN3**, E9PBC5\_HUMAN Plasma kallikrein heavy chain OS=Homo sapiens GN=KLKB1 PE=2 SV=1

Match to Query 4015: 1436.777328 from(719.395940,2+) intensity(1334619.6250) rtinseconds(1982) scans(5028) index(5445)

Title: 111019\_Est\_ISCardio\_NMI\_YP\_G\_8Spectrum4417\_scans\_\_5028

Data file C:\\mascot\\20140703\_Tmgf\_1D\\CSV\_UseAnalysis\\MasterCSV\\All\_Glyco\\mgf\\ptm\\UC18ERLIC\_PTM\_35D.mgf

Click mouse within plot area to zoom in by factor of two about that point

Or, to Da

Label all possible matches Label matches used for scoring

Show Y-axis

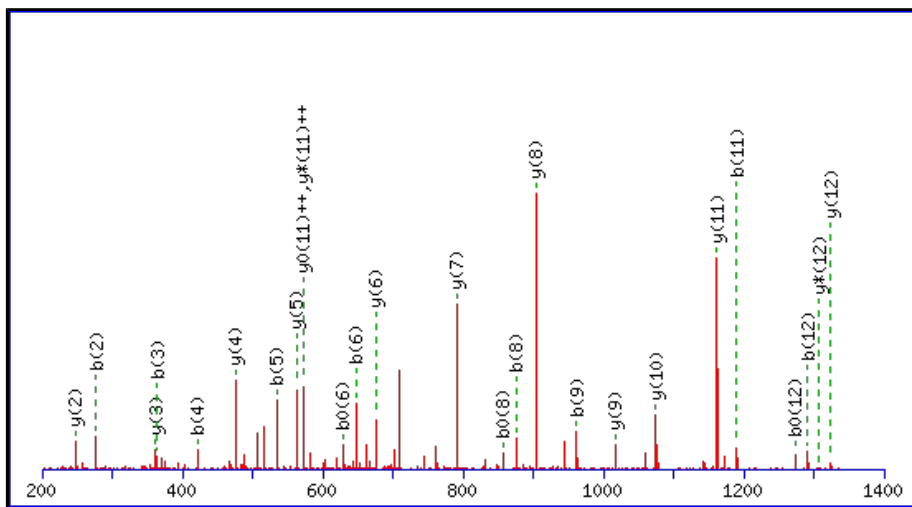

Monoisotopic mass of neutral peptide  $M_r(\text{calc})$ : 1436.7762

Fixed modifications: Carbamidomethyl (C) (apply to specified residues or termini only)

Variable modifications:

N7 : Deamidated (NQ)

Ions Score: 101 Expect: 1.3e-008

Matches : 26/126 fragment ions using 36 most intense peaks ([help](#))

| #  | b                | b <sup>++</sup> | b <sup>*</sup> | b <sup>***</sup> | b <sup>0</sup>   | b <sup>0++</sup> | Seq. | y                | y <sup>++</sup> | y <sup>*</sup>   | y <sup>***</sup> | y <sup>0</sup> | y <sup>0++</sup> | #  |
|----|------------------|-----------------|----------------|------------------|------------------|------------------|------|------------------|-----------------|------------------|------------------|----------------|------------------|----|
| 1  | 114.0913         | 57.5493         |                |                  |                  |                  | I    |                  |                 |                  |                  |                |                  | 13 |
| 2  | <b>277.1547</b>  | 139.0810        |                |                  |                  |                  | Y    | <b>1324.6995</b> | 662.8534        | <b>1307.6729</b> | 654.3401         | 1306.6889      | 653.8481         | 12 |
| 3  | <b>364.1867</b>  | 182.5970        |                |                  | 346.1761         | 173.5917         | S    | <b>1161.6361</b> | 581.3217        | 1144.6096        | <b>572.8084</b>  | 1143.6256      | <b>572.3164</b>  | 11 |
| 4  | <b>421.2082</b>  | 211.1077        |                |                  | 403.1976         | 202.1024         | G    | <b>1074.6041</b> | 537.8057        | 1057.5776        | 529.2924         | 1056.5936      | 528.8004         | 10 |
| 5  | <b>534.2922</b>  | 267.6498        |                |                  | 516.2817         | 258.6445         | I    | <b>1017.5827</b> | 509.2950        | 1000.5561        | 500.7817         | 999.5721       | 500.2897         | 9  |
| 6  | <b>647.3763</b>  | 324.1918        |                |                  | <b>629.3657</b>  | 315.1865         | L    | <b>904.4986</b>  | 452.7529        | 887.4720         | 444.2397         | 886.4880       | 443.7476         | 8  |
| 7  | 762.4032         | 381.7053        | 745.3767       | 373.1920         | 744.3927         | 372.7000         | N    | <b>791.4145</b>  | 396.2109        | 774.3880         | 387.6976         | 773.4040       | 387.2056         | 7  |
| 8  | <b>875.4873</b>  | 438.2473        | 858.4607       | 429.7340         | <b>857.4767</b>  | 429.2420         | L    | <b>676.3876</b>  | 338.6974        | 659.3610         | 330.1842         | 658.3770       | 329.6921         | 6  |
| 9  | <b>962.5193</b>  | 481.7633        | 945.4928       | 473.2500         | 944.5088         | 472.7580         | S    | <b>563.3035</b>  | 282.1554        | 546.2770         | 273.6421         | 545.2930       | 273.1501         | 5  |
| 10 | 1077.5463        | 539.2768        | 1060.5197      | 530.7635         | 1059.5357        | 530.2715         | D    | <b>476.2715</b>  | 238.6394        | 459.2449         | 230.1261         | 458.2609       | 229.6341         | 4  |
| 11 | <b>1190.6303</b> | 595.8188        | 1173.6038      | 587.3055         | 1172.6198        | 586.8135         | I    | <b>361.2445</b>  | 181.1259        | 344.2180         | 172.6126         | 343.2340       | 172.1206         | 3  |
| 12 | <b>1291.6780</b> | 646.3426        | 1274.6515      | 637.8294         | <b>1273.6674</b> | 637.3374         | T    | <b>248.1605</b>  | 124.5839        | 231.1339         | 116.0706         | 230.1499       | 115.5786         | 2  |
| 13 |                  |                 |                |                  |                  |                  | K    | 147.1128         | 74.0600         | 130.0863         | 65.5468          |                |                  | 1  |

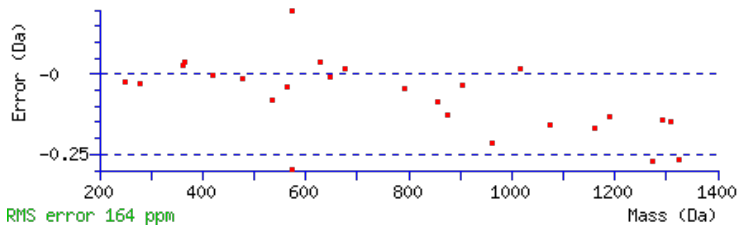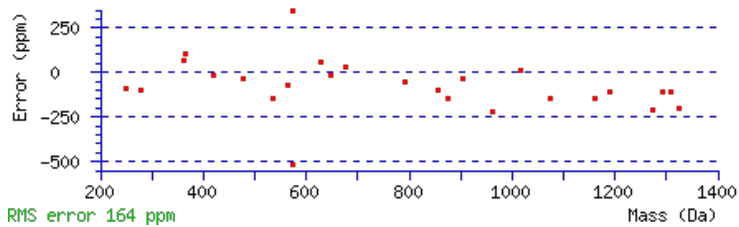

NCBI BLAST search of [IYSGILNLSDITK](#)

(Parameters: blastp, nr protein database, expect=20000, no filter, PAM30)

Other BLAST [web gateways](#)

**All matches to this query**

| Score | Mr(calc)  | Delta   | Sequence                      |
|-------|-----------|---------|-------------------------------|
| 100.6 | 1436.7762 | 0.0011  | <a href="#">IYSGILNLSDITK</a> |
| 18.2  | 1436.7762 | 0.0011  | <a href="#">LYVIQTLEETTK</a>  |
| 16.1  | 1434.7718 | 2.0055  | <a href="#">QKYLAQLLNSVR</a>  |
| 15.9  | 1434.7718 | 2.0055  | <a href="#">KEYLEKIQGAQK</a>  |
| 12.8  | 1434.7718 | 2.0055  | <a href="#">KEEFQELLGKSK</a>  |
| 9.2   | 1434.7718 | 2.0055  | <a href="#">KQEKQFDGITK</a>   |
| 8.5   | 1434.7718 | 2.0055  | <a href="#">KEYLEKIQGAQK</a>  |
| 7.8   | 1434.7718 | 2.0055  | <a href="#">KQEKQFDGITK</a>   |
| 6.8   | 1434.7653 | 2.0121  | <a href="#">ENRLMFKILDR</a>   |
| 3.4   | 1436.7776 | -0.0003 | <a href="#">LSIGEDVVFVRR</a>  |

Mascot: <http://www.matrixscience.com/>

# MASCOT SCIENCE Mascot Search Results

## Peptide View

MS/MS Fragmentation of **IYPGVDFGGEELNVTFVK**

Found in **E9PBC5** in **con\_Xuniprot\_HUMAN3**, E9PBC5\_HUMAN Plasma kallikrein heavy chain OS=Homo sapiens GN=KLKB1 PE=2 SV=1

Match to Query 11945: 1983.987048 from(993.000800,2+) intensity(1175188.1250) rtinseconds(2246) scans(5526) index(11992)

Title: 111019\_Est\_ISCardio\_NMI\_YS\_G\_8Spectrum4787\_scans\_\_5526

Data file C:\\mascot\\20140703\_Tmgf\_1D\\CSV\_UseAnalysis\\MasterCSV\\All\_Glyco\\mgf\\ptm\\UC18ERLIC\_PTM\_35D.mgf

Click mouse within plot area to zoom in by factor of two about that point

Or, to Da

Label all possible matches Label matches used for scoring

Show Y-axis

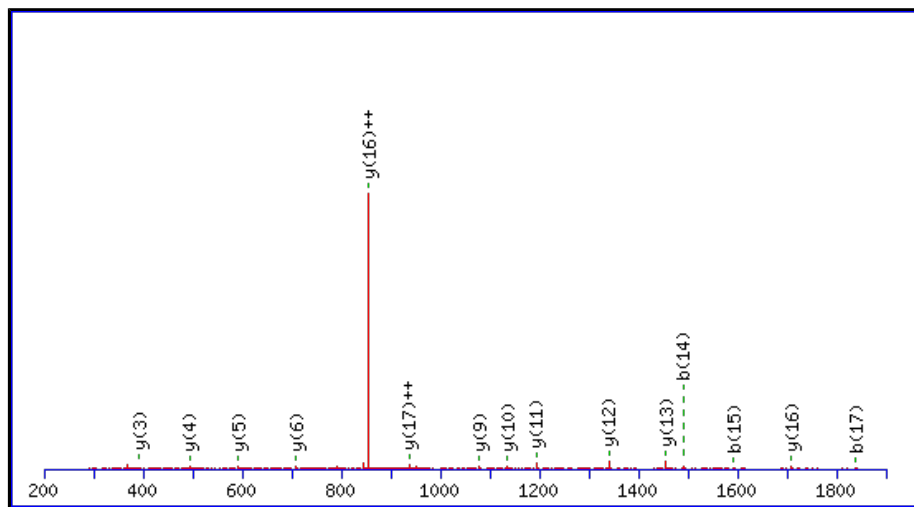

Monoisotopic mass of neutral peptide Mr(calc): 1983.9830

Fixed modifications: Carbamidomethyl (C) (apply to specified residues or termini only)

Variable modifications:

N13 : Deamidated (NQ)

Ions Score: 98 Expect: 3.6e-008

Matches : 15/164 fragment ions using 16 most intense peaks ([help](#))

| #  | b         | b <sup>++</sup> | b <sup>*</sup> | b <sup>*++</sup> | b <sup>0</sup> | b <sup>0++</sup> | Seq. | y         | y <sup>++</sup> | y <sup>*</sup> | y <sup>*++</sup> | y <sup>0</sup> | y <sup>0++</sup> | #  |
|----|-----------|-----------------|----------------|------------------|----------------|------------------|------|-----------|-----------------|----------------|------------------|----------------|------------------|----|
| 1  | 114.0913  | 57.5493         |                |                  |                |                  | I    |           |                 |                |                  |                |                  | 18 |
| 2  | 277.1547  | 139.0810        |                |                  |                |                  | Y    | 1871.9062 | 936.4567        | 1854.8796      | 927.9435         | 1853.8956      | 927.4514         | 17 |
| 3  | 374.2074  | 187.6074        |                |                  |                |                  | P    | 1708.8428 | 854.9251        | 1691.8163      | 846.4118         | 1690.8323      | 845.9198         | 16 |
| 4  | 431.2289  | 216.1181        |                |                  |                |                  | G    | 1611.7901 | 806.3987        | 1594.7635      | 797.8854         | 1593.7795      | 797.3934         | 15 |
| 5  | 530.2973  | 265.6523        |                |                  |                |                  | V    | 1554.7686 | 777.8879        | 1537.7421      | 769.3747         | 1536.7581      | 768.8827         | 14 |
| 6  | 645.3243  | 323.1658        |                |                  | 627.3137       | 314.1605         | D    | 1455.7002 | 728.3537        | 1438.6737      | 719.8405         | 1437.6896      | 719.3485         | 13 |
| 7  | 792.3927  | 396.7000        |                |                  | 774.3821       | 387.6947         | F    | 1340.6733 | 670.8403        | 1323.6467      | 662.3270         | 1322.6627      | 661.8350         | 12 |
| 8  | 849.4141  | 425.2107        |                |                  | 831.4036       | 416.2054         | G    | 1193.6048 | 597.3061        | 1176.5783      | 588.7928         | 1175.5943      | 588.3008         | 11 |
| 9  | 906.4356  | 453.7214        |                |                  | 888.4250       | 444.7162         | G    | 1136.5834 | 568.7953        | 1119.5568      | 560.2821         | 1118.5728      | 559.7900         | 10 |
| 10 | 1035.4782 | 518.2427        |                |                  | 1017.4676      | 509.2375         | E    | 1079.5619 | 540.2846        | 1062.5354      | 531.7713         | 1061.5514      | 531.2793         | 9  |
| 11 | 1164.5208 | 582.7640        |                |                  | 1146.5102      | 573.7587         | E    | 950.5193  | 475.7633        | 933.4928       | 467.2500         | 932.5088       | 466.7580         | 8  |
| 12 | 1277.6048 | 639.3061        |                |                  | 1259.5943      | 630.3008         | L    | 821.4767  | 411.2420        | 804.4502       | 402.7287         | 803.4662       | 402.2367         | 7  |
| 13 | 1392.6318 | 696.8195        | 1375.6052      | 688.3063         | 1374.6212      | 687.8143         | N    | 708.3927  | 354.7000        | 691.3661       | 346.1867         | 690.3821       | 345.6947         | 6  |
| 14 | 1491.7002 | 746.3537        | 1474.6737      | 737.8405         | 1473.6896      | 737.3485         | V    | 593.3657  | 297.1865        | 576.3392       | 288.6732         | 575.3552       | 288.1812         | 5  |
| 15 | 1592.7479 | 796.8776        | 1575.7213      | 788.3643         | 1574.7373      | 787.8723         | T    | 494.2973  | 247.6523        | 477.2708       | 239.1390         | 476.2867       | 238.6470         | 4  |
| 16 | 1739.8163 | 870.4118        | 1722.7897      | 861.8985         | 1721.8057      | 861.4065         | F    | 393.2496  | 197.1285        | 376.2231       | 188.6152         |                |                  | 3  |
| 17 | 1838.8847 | 919.9460        | 1821.8582      | 911.4327         | 1820.8741      | 910.9407         | V    | 246.1812  | 123.5942        | 229.1547       | 115.0810         |                |                  | 2  |
| 18 |           |                 |                |                  |                |                  | K    | 147.1128  | 74.0600         | 130.0863       | 65.5468          |                |                  | 1  |

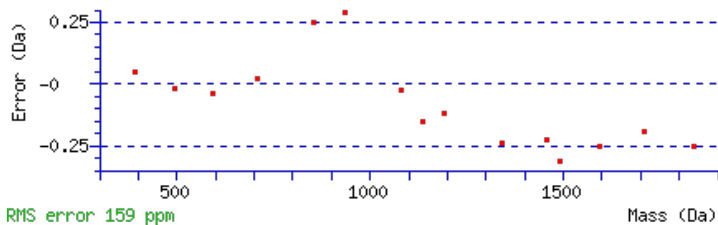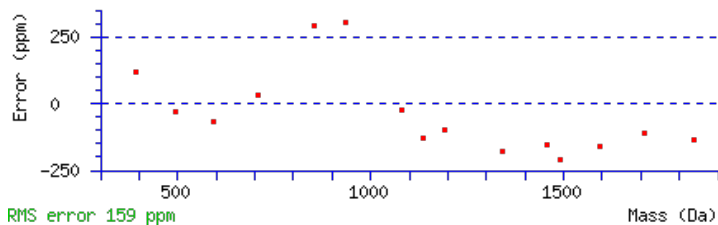

NCBI **BLAST** search of [IYPGVDFGGEELNVTFVK](#)

(Parameters: blastp, nr protein database, expect=20000, no filter, PAM30)

Other BLAST [web gateways](#)

**All matches to this query**

| Score | Mr(calc)  | Delta   | Sequence                           |
|-------|-----------|---------|------------------------------------|
| 98.2  | 1983.9830 | 0.0041  | <a href="#">IYPGVDFGGEELNVTFVK</a> |
| 13.2  | 1982.9796 | 1.0074  | <a href="#">SDDITSTKQQSFNLRLK</a>  |
| 12.2  | 1982.9796 | 1.0074  | <a href="#">GKGQLPGSEKQLEEQPQK</a> |
| 12.2  | 1982.9796 | 1.0074  | <a href="#">GKGQLPGSEKQLEEQPQK</a> |
| 11.5  | 1982.9796 | 1.0074  | <a href="#">GKGQLPGSEKQLEEQPQK</a> |
| 8.9   | 1983.9897 | -0.0026 | <a href="#">FLLTKMEQQQLETVMK</a>   |
| 8.9   | 1983.9897 | -0.0026 | <a href="#">FLLTKMEQQQLETVMK</a>   |
| 8.9   | 1983.9897 | -0.0026 | <a href="#">FLLTKMEQQQLETVMK</a>   |
| 8.9   | 1982.9839 | 1.0032  | <a href="#">MSKSSSLMKVEMOLOQK</a>  |
| 8.8   | 1982.9745 | 1.0126  | <a href="#">QHQVLHSARSEFAKGCEK</a> |

Mascot: <http://www.matrixscience.com/>

# MASCOT SCIENCE Mascot Search Results

## Peptide View

MS/MS Fragmentation of **IVGGTNSSWGEWQPWVSLQVK**

Found in **E9PBC5** in **con\_Xuniprot\_HUMAN3**, E9PBC5\_HUMAN Plasma kallikrein heavy chain OS=Homo sapiens GN=KLKB1 PE=2 SV=1

Match to Query 17886: 2358.172568 from(1180.093560,2+) intensity(20610.5195) rtinseconds(2456) scans(6377) index(4011)

Title: 111019\_Est\_ISCardio\_NMI\_YP\_G\_6Spectrum5211\_scans\_6377

Data file C:\mascot\20140703\_Tmgf\_1D\CSV\_UseAnalysis\MasterCSV\All\_Glyco\mgf\ptm\UC18ERLIC\_PTM\_35D.mgf

Click mouse within plot area to zoom in by factor of two about that point

Or,  to  Da

Label all possible matches  Label matches used for scoring

Show Y-axis

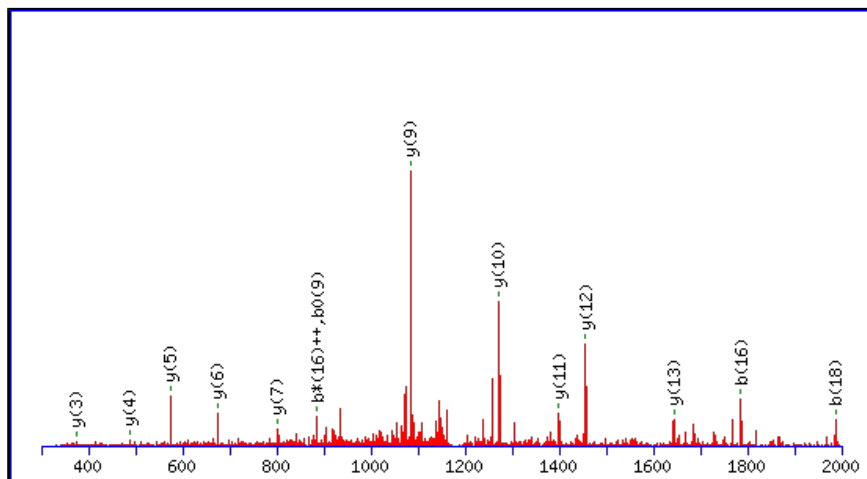

Monoisotopic mass of neutral peptide Mr(calc): 2358.1645

Fixed modifications: Carbamidomethyl (C) (apply to specified residues or termini only)

Variable modifications:

N6 : Deamidated (NQ)

Ions Score: 75 Expect: 8.1e-006

Matches : 14/214 fragment ions using 17 most intense peaks ([help](#))

| #  | b         | b <sup>++</sup> | b*        | b <sup>*++</sup> | b <sup>0</sup> | b <sup>0++</sup> | Seq. | y         | y <sup>++</sup> | y*        | y <sup>*++</sup> | y <sup>0</sup> | y <sup>0++</sup> | #  |
|----|-----------|-----------------|-----------|------------------|----------------|------------------|------|-----------|-----------------|-----------|------------------|----------------|------------------|----|
| 1  | 114.0913  | 57.5493         |           |                  |                |                  | I    |           |                 |           |                  |                |                  | 21 |
| 2  | 213.1598  | 107.0835        |           |                  |                |                  | V    | 2246.0877 | 1123.5475       | 2229.0611 | 1115.0342        | 2228.0771      | 1114.5422        | 20 |
| 3  | 270.1812  | 135.5942        |           |                  |                |                  | G    | 2147.0192 | 1074.0133       | 2129.9927 | 1065.5000        | 2129.0087      | 1065.0080        | 19 |
| 4  | 327.2027  | 164.1050        |           |                  |                |                  | G    | 2089.9978 | 1045.5025       | 2072.9712 | 1036.9893        | 2071.9872      | 1036.4972        | 18 |
| 5  | 428.2504  | 214.6288        |           |                  | 410.2398       | 205.6235         | T    | 2032.9763 | 1016.9918       | 2015.9498 | 1008.4785        | 2014.9658      | 1007.9865        | 17 |
| 6  | 543.2773  | 272.1423        | 526.2508  | 263.6290         | 525.2667       | 263.1370         | N    | 1931.9286 | 966.4680        | 1914.9021 | 957.9547         | 1913.9181      | 957.4627         | 16 |
| 7  | 630.3093  | 315.6583        | 613.2828  | 307.1450         | 612.2988       | 306.6530         | S    | 1816.9017 | 908.9545        | 1799.8751 | 900.4412         | 1798.8911      | 899.9492         | 15 |
| 8  | 717.3414  | 359.1743        | 700.3148  | 350.6610         | 699.3308       | 350.1690         | S    | 1729.8697 | 865.4385        | 1712.8431 | 856.9252         | 1711.8591      | 856.4332         | 14 |
| 9  | 903.4207  | 452.2140        | 886.3941  | 443.7007         | 885.4101       | 443.2087         | W    | 1642.8376 | 821.9225        | 1625.8111 | 813.4092         | 1624.8271      | 812.9172         | 13 |
| 10 | 960.4421  | 480.7247        | 943.4156  | 472.2114         | 942.4316       | 471.7194         | G    | 1456.7583 | 728.8828        | 1439.7318 | 720.3695         | 1438.7478      | 719.8775         | 12 |
| 11 | 1089.4847 | 545.2460        | 1072.4582 | 536.7327         | 1071.4742      | 536.2407         | E    | 1399.7369 | 700.3721        | 1382.7103 | 691.8588         | 1381.7263      | 691.3668         | 11 |
| 12 | 1275.5640 | 638.2857        | 1258.5375 | 629.7724         | 1257.5535      | 629.2804         | W    | 1270.6943 | 635.8508        | 1253.6677 | 627.3375         | 1252.6837      | 626.8455         | 10 |
| 13 | 1372.6168 | 686.8120        | 1355.5903 | 678.2988         | 1354.6062      | 677.8068         | P    | 1084.6150 | 542.8111        | 1067.5884 | 534.2978         | 1066.6044      | 533.8058         | 9  |
| 14 | 1558.6961 | 779.8517        | 1541.6696 | 771.3384         | 1540.6856      | 770.8464         | W    | 987.5622  | 494.2847        | 970.5356  | 485.7715         | 969.5516       | 485.2795         | 8  |
| 15 | 1686.7547 | 843.8810        | 1669.7281 | 835.3677         | 1668.7441      | 834.8757         | Q    | 801.4829  | 401.2451        | 784.4563  | 392.7318         | 783.4723       | 392.2398         | 7  |
| 16 | 1785.8231 | 893.4152        | 1768.7966 | 884.9019         | 1767.8125      | 884.4099         | V    | 673.4243  | 337.2158        | 656.3978  | 328.7025         | 655.4137       | 328.2105         | 6  |
| 17 | 1872.8551 | 936.9312        | 1855.8286 | 928.4179         | 1854.8446      | 927.9259         | S    | 574.3559  | 287.6816        | 557.3293  | 279.1683         | 556.3453       | 278.6763         | 5  |
| 18 | 1985.9392 | 993.4732        | 1968.9127 | 984.9600         | 1967.9286      | 984.4680         | L    | 487.3239  | 244.1656        | 470.2973  | 235.6523         |                |                  | 4  |
| 19 | 2113.9978 | 1057.5025       | 2096.9712 | 1048.9893        | 2095.9872      | 1048.4972        | Q    | 374.2398  | 187.6235        | 357.2132  | 179.1103         |                |                  | 3  |
| 20 | 2213.0662 | 1107.0367       | 2196.0396 | 1098.5235        | 2195.0556      | 1098.0315        | V    | 246.1812  | 123.5942        | 229.1547  | 115.0810         |                |                  | 2  |
| 21 |           |                 |           |                  |                |                  | K    | 147.1128  | 74.0600         | 130.0863  | 65.5468          |                |                  | 1  |

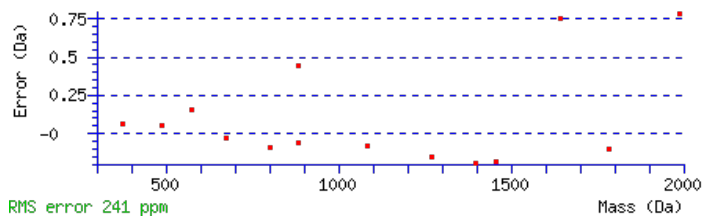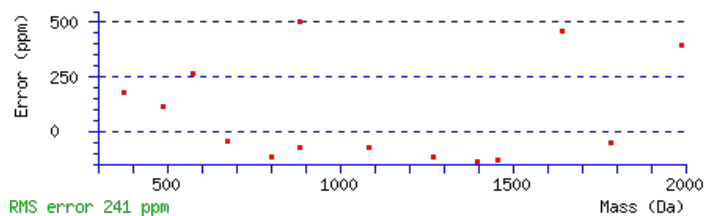

NCBI BLAST search of [IVGGTNSSWGEWPWQVSLQVK](#)

(Parameters: blastp, nr protein database, expect=20000, no filter, PAM30)

Other BLAST [web gateways](#)

All matches to this query

| Score | Mr(calc)  | Delta   | Sequence                               | Site Analysis         |
|-------|-----------|---------|----------------------------------------|-----------------------|
| 75.2  | 2358.1645 | 0.0081  | <a href="#">IVGGTNSSWGEWPWQVSLQVK</a>  | Deamidated N6 100.00% |
| 63.4  | 2357.1804 | 0.9921  | <a href="#">IVGGTNSSWGEWPWQVSLQVK</a>  |                       |
| 26.7  | 2358.1645 | 0.0081  | <a href="#">IVGGTNSSWGEWPWQVSLQVK</a>  | Deamidated Q15 0.00%  |
| 16.9  | 2357.1658 | 1.0067  | <a href="#">GGEEGGSVQPRAQYARLCPGLR</a> |                       |
| 4.6   | 2358.1676 | 0.0050  | <a href="#">QAGSAAPRPPRAQQPQPSQEK</a>  |                       |
| 4.0   | 2358.1736 | -0.0010 | <a href="#">LSEMDNPVLQAAEKLELERR</a>   |                       |
| 3.4   | 2358.1676 | 0.0050  | <a href="#">QAGSAAPRPPRAQQPQPSQEK</a>  |                       |
| 3.2   | 2357.1726 | 1.0000  | <a href="#">LMEEASFDGTFWLKITNVTR</a>   |                       |
| 2.8   | 2358.1736 | -0.0010 | <a href="#">GAIEQKQKEMQLELDLAEQR</a>   |                       |
| 1.5   | 2358.1645 | 0.0081  | <a href="#">IVGGTNSSWGEWPWQVSLQVK</a>  | Deamidated Q19 0.00%  |

Mascot: <http://www.matrixscience.com/>

# MASCOT SCIENCE Mascot Search Results

## Peptide View

MS/MS Fragmentation of **IYSGILNLSDITKDTPFQIK**

Found in **E9PBC5** in **con\_Xuniprot\_HUMAN3**, E9PBC5\_HUMAN Plasma kallikrein heavy chain OS=Homo sapiens GN=KLKB1 PE=2 SV=1

Match to Query 17820: 2353.247468 from(1177.631010,2+) intensity(65463.6328) rtinseconds(2422) scans(6334) index(1557)

Title: 111019\_Est\_ISCardio\_NMI\_YP\_G\_3Spectrum5549\_scans\_6334

Data file C:\mascot\20140703\_Tmgf\_1D\CSV\_UseAnalysis\MasterCSV\All\_Glyco\mgf\ptm\UC18ERLIC\_PTM\_35D.mgf

Click mouse within plot area to zoom in by factor of two about that point

Or, to Da

Label all possible matches Label matches used for scoring

Show Y-axis

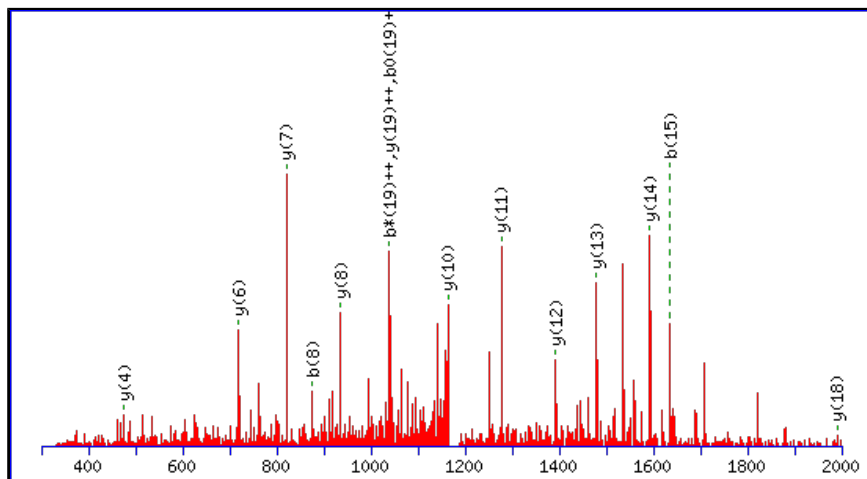

Monoisotopic mass of neutral peptide Mr(calc): 2353.2417

Fixed modifications: Carbamidomethyl (C) (apply to specified residues or termini only)

Variable modifications:

N7 : Deamidated (NQ)

Ions Score: 75 Expect: 5.6e-006

Matches : 15/218 fragment ions using 17 most intense peaks ([help](#))

| #  | b         | b <sup>++</sup> | b*        | b <sup>*++</sup> | b <sup>0</sup> | b <sup>0++</sup> | Seq. | y         | y <sup>++</sup> | y*        | y <sup>*++</sup> | y <sup>0</sup> | y <sup>0++</sup> | #  |
|----|-----------|-----------------|-----------|------------------|----------------|------------------|------|-----------|-----------------|-----------|------------------|----------------|------------------|----|
| 1  | 114.0913  | 57.5493         |           |                  |                |                  | I    |           |                 |           |                  |                |                  | 21 |
| 2  | 277.1547  | 139.0810        |           |                  |                |                  | Y    | 2241.1649 | 1121.0861       | 2224.1384 | 1112.5728        | 2223.1543      | 1112.0808        | 20 |
| 3  | 364.1867  | 182.5970        |           |                  | 346.1761       | 173.5917         | S    | 2078.1016 | 1039.5544       | 2061.0750 | 1031.0412        | 2060.0910      | 1030.5491        | 19 |
| 4  | 421.2082  | 211.1077        |           |                  | 403.1976       | 202.1024         | G    | 1991.0696 | 996.0384        | 1974.0430 | 987.5251         | 1973.0590      | 987.0331         | 18 |
| 5  | 534.2922  | 267.6498        |           |                  | 516.2817       | 258.6445         | I    | 1934.0481 | 967.5277        | 1917.0215 | 959.0144         | 1916.0375      | 958.5224         | 17 |
| 6  | 647.3763  | 324.1918        |           |                  | 629.3657       | 315.1865         | L    | 1820.9640 | 910.9856        | 1803.9375 | 902.4724         | 1802.9535      | 901.9804         | 16 |
| 7  | 762.4032  | 381.7053        | 745.3767  | 373.1920         | 744.3927       | 372.7000         | N    | 1707.8800 | 854.4436        | 1690.8534 | 845.9303         | 1689.8694      | 845.4383         | 15 |
| 8  | 875.4873  | 438.2473        | 858.4607  | 429.7340         | 857.4767       | 429.2420         | L    | 1592.8530 | 796.9301        | 1575.8265 | 788.4169         | 1574.8425      | 787.9249         | 14 |
| 9  | 962.5193  | 481.7633        | 945.4928  | 473.2500         | 944.5088       | 472.7580         | S    | 1479.7690 | 740.3881        | 1462.7424 | 731.8748         | 1461.7584      | 731.3828         | 13 |
| 10 | 1077.5463 | 539.2768        | 1060.5197 | 530.7635         | 1059.5357      | 530.2715         | D    | 1392.7369 | 696.8721        | 1375.7104 | 688.3588         | 1374.7264      | 687.8668         | 12 |
| 11 | 1190.6303 | 595.8188        | 1173.6038 | 587.3055         | 1172.6198      | 586.8135         | I    | 1277.7100 | 639.3586        | 1260.6834 | 630.8454         | 1259.6994      | 630.3533         | 11 |
| 12 | 1291.6780 | 646.3426        | 1274.6515 | 637.8294         | 1273.6674      | 637.3374         | T    | 1164.6259 | 582.8166        | 1147.5994 | 574.3033         | 1146.6154      | 573.8113         | 10 |
| 13 | 1419.7730 | 710.3901        | 1402.7464 | 701.8768         | 1401.7624      | 701.3848         | K    | 1063.5782 | 532.2928        | 1046.5517 | 523.7795         | 1045.5677      | 523.2875         | 9  |
| 14 | 1534.7999 | 767.9036        | 1517.7734 | 759.3903         | 1516.7894      | 758.8983         | D    | 935.4833  | 468.2453        | 918.4567  | 459.7320         | 917.4727       | 459.2400         | 8  |
| 15 | 1635.8476 | 818.4274        | 1618.8210 | 809.9142         | 1617.8370      | 809.4222         | T    | 820.4563  | 410.7318        | 803.4298  | 402.2185         | 802.4458       | 401.7265         | 7  |
| 16 | 1732.9004 | 866.9538        | 1715.8738 | 858.4405         | 1714.8898      | 857.9485         | P    | 719.4087  | 360.2080        | 702.3821  | 351.6947         | 701.3981       | 351.2027         | 6  |
| 17 | 1879.9688 | 940.4880        | 1862.9422 | 931.9748         | 1861.9582      | 931.4827         | F    | 622.3559  | 311.6816        | 605.3293  | 303.1683         | 604.3453       | 302.6763         | 5  |
| 18 | 1967.0008 | 984.0040        | 1949.9743 | 975.4908         | 1948.9902      | 974.9988         | S    | 475.2875  | 238.1474        | 458.2609  | 229.6341         | 457.2769       | 229.1421         | 4  |
| 19 | 2095.0594 | 1048.0333       | 2078.0328 | 1039.5201        | 2077.0488      | 1039.0280        | Q    | 388.2554  | 194.6314        | 371.2289  | 186.1181         |                |                  | 3  |
| 20 | 2208.1434 | 1104.5754       | 2191.1169 | 1096.0621        | 2190.1329      | 1095.5701        | I    | 260.1969  | 130.6021        | 243.1703  | 122.0888         |                |                  | 2  |
| 21 |           |                 |           |                  |                |                  | K    | 147.1128  | 74.0600         | 130.0863  | 65.5468          |                |                  | 1  |



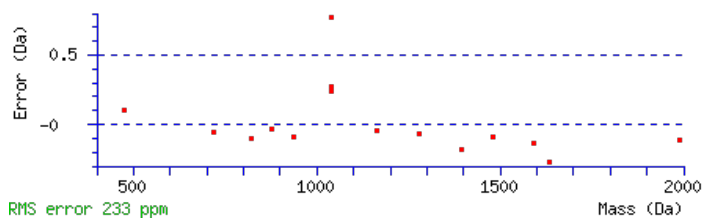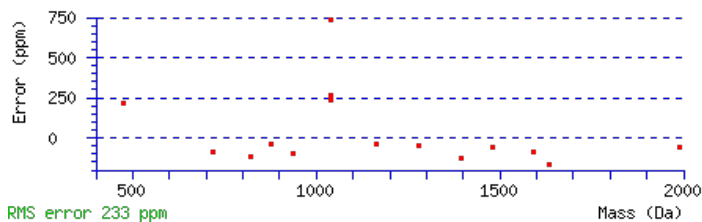

NCBI BLAST search of [IYSGILNLSDITKDTPFQIK](#)

(Parameters: blastp, nr protein database, expect=20000, no filter, PAM30)

Other BLAST [web gateways](#)

All matches to this query

| Score | Mr(calc)  | Delta   | Sequence                              | Site Analysis        |
|-------|-----------|---------|---------------------------------------|----------------------|
| 74.7  | 2353.2417 | 0.0058  | <a href="#">IYSGILNLSDITKDTPFQIK</a>  | Deamidated N7 99.94% |
| 42.5  | 2353.2417 | 0.0058  | <a href="#">IYSGILNLSDITKDTPFQIK</a>  | Deamidated Q19 0.06% |
| 4.3   | 2351.2519 | 1.9956  | <a href="#">ILMTELRTLATGYEVDGGKLR</a> |                      |
| 0.8   | 2353.2529 | -0.0054 | <a href="#">QKPOTKLHITFLSTDPIEEK</a>  |                      |

Mascot: <http://www.matrixscience.com/>

# MATRIX SCIENCE Mascot Search Results

## Peptide View

MS/MS Fragmentation of **GVNFNVSKVSSVEECQK**

Found in **C9IYG8** in **con\_Xuniprot\_HUMAN3**, C9IYG8\_HUMAN Plasma kallikrein heavy chain (Fragment) OS=Homo sapiens GN=KLKB1 PE=2 SV=1

Match to Query 11521: 1910.913668 from(956.464110,2+) intensity(7864.0273) rtinseconds(888) scans(2096) index(24419)  
 Title: 111019\_Est\_MI\_YS\_G\_06Spectrum1809\_scans\_2096  
 Data file C:\mascot\20140703\_Tmgf\_1D\CSV\_UseAnalysis\MasterCSV\All\_Glyco\mgf\ptm\UC18ERLIC\_PTM\_35D.mgf

Click mouse within plot area to zoom in by factor of two about that point

Or, to Da  
 Label all possible matches Label matches used for scoring  
 Show Y-axis

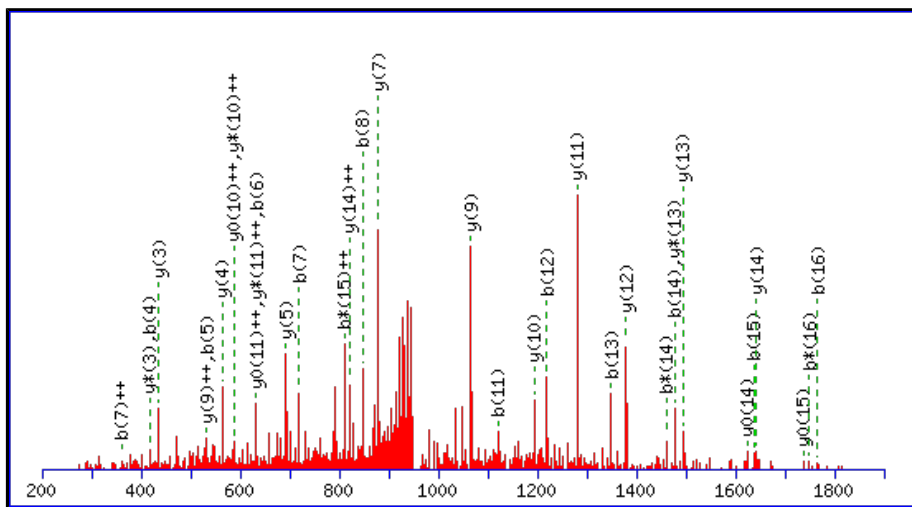

Monoisotopic mass of neutral peptide **Mr(calc)**: 1910.9044  
 Fixed modifications: Carbamidomethyl (C) (apply to specified residues or termini only)  
 Variable modifications:  
 N5 : Deamidated (NQ)  
 Ions Score: 72 Expect: 1.3e-005  
 Matches : 35/170 fragment ions using 48 most intense peaks ([help](#))

| #  | b                | b <sup>++</sup> | b <sup>*</sup>   | b <sup>***</sup> | b <sup>0</sup> | b <sup>0++</sup> | Seq.     | y                | y <sup>++</sup> | y <sup>*</sup>   | y <sup>***</sup> | y <sup>0</sup>   | y <sup>0++</sup> | #  |
|----|------------------|-----------------|------------------|------------------|----------------|------------------|----------|------------------|-----------------|------------------|------------------|------------------|------------------|----|
| 1  | 58.0287          | 29.5180         |                  |                  |                |                  | <b>G</b> |                  |                 |                  |                  |                  |                  | 17 |
| 2  | 157.0972         | 79.0522         |                  |                  |                |                  | <b>V</b> | 1854.8902        | 927.9487        | 1837.8637        | 919.4355         | 1836.8796        | 918.9435         | 16 |
| 3  | 271.1401         | 136.0737        | 254.1135         | 127.5604         |                |                  | <b>N</b> | 1755.8218        | 878.4145        | 1738.7952        | 869.9013         | 1737.8112        | 869.4093         | 15 |
| 4  | <b>418.2085</b>  | 209.6079        | 401.1819         | 201.0946         |                |                  | <b>F</b> | <b>1641.7789</b> | <b>821.3931</b> | 1624.7523        | 812.8798         | <b>1623.7683</b> | 812.3878         | 14 |
| 5  | <b>533.2354</b>  | 267.1214        | 516.2089         | 258.6081         |                |                  | <b>N</b> | <b>1494.7104</b> | 747.8589        | <b>1477.6839</b> | 739.3456         | 1476.6999        | 738.8536         | 13 |
| 6  | <b>632.3039</b>  | 316.6556        | 615.2773         | 308.1423         |                |                  | <b>V</b> | <b>1379.6835</b> | 690.3454        | 1362.6570        | 681.8321         | 1361.6729        | 681.3401         | 12 |
| 7  | <b>719.3359</b>  | <b>360.1716</b> | 702.3093         | 351.6583         | 701.3253       | 351.1663         | <b>S</b> | <b>1280.6151</b> | 640.8112        | 1263.5885        | <b>632.2979</b>  | 1262.6045        | <b>631.8059</b>  | 11 |
| 8  | <b>847.4308</b>  | 424.2191        | 830.4043         | 415.7058         | 829.4203       | 415.2138         | <b>K</b> | <b>1193.5831</b> | 597.2952        | 1176.5565        | <b>588.7819</b>  | 1175.5725        | <b>588.2899</b>  | 10 |
| 9  | 946.4993         | 473.7533        | 929.4727         | 465.2400         | 928.4887       | 464.7480         | <b>V</b> | <b>1065.4881</b> | <b>533.2477</b> | 1048.4616        | 524.7344         | 1047.4775        | 524.2424         | 9  |
| 10 | 1033.5313        | 517.2693        | 1016.5047        | 508.7560         | 1015.5207      | 508.2640         | <b>S</b> | 966.4197         | 483.7135        | 949.3931         | 475.2002         | 948.4091         | 474.7082         | 8  |
| 11 | <b>1120.5633</b> | 560.7853        | 1103.5368        | 552.2720         | 1102.5527      | 551.7800         | <b>S</b> | <b>879.3877</b>  | 440.1975        | 862.3611         | 431.6842         | 861.3771         | 431.1922         | 7  |
| 12 | <b>1219.6317</b> | 610.3195        | 1202.6052        | 601.8062         | 1201.6212      | 601.3142         | <b>V</b> | 792.3556         | 396.6815        | 775.3291         | 388.1682         | 774.3451         | 387.6762         | 6  |
| 13 | <b>1348.6743</b> | 674.8408        | 1331.6478        | 666.3275         | 1330.6638      | 665.8355         | <b>E</b> | <b>693.2872</b>  | 347.1472        | 676.2607         | 338.6340         | 675.2767         | 338.1420         | 5  |
| 14 | <b>1477.7169</b> | 739.3621        | <b>1460.6904</b> | 730.8488         | 1459.7063      | 730.3568         | <b>E</b> | <b>564.2446</b>  | 282.6260        | 547.2181         | 274.1127         | 546.2341         | 273.6207         | 4  |
| 15 | <b>1637.7476</b> | 819.3774        | 1620.7210        | <b>810.8641</b>  | 1619.7370      | 810.3721         | <b>C</b> | <b>435.2020</b>  | 218.1047        | <b>418.1755</b>  | 209.5914         |                  |                  | 3  |
| 16 | <b>1765.8061</b> | 883.4067        | <b>1748.7796</b> | 874.8934         | 1747.7956      | 874.4014         | <b>Q</b> | 275.1714         | 138.0893        | 258.1448         | 129.5761         |                  |                  | 2  |
| 17 |                  |                 |                  |                  |                |                  | <b>K</b> | 147.1128         | 74.0600         | 130.0863         | 65.5468          |                  |                  | 1  |

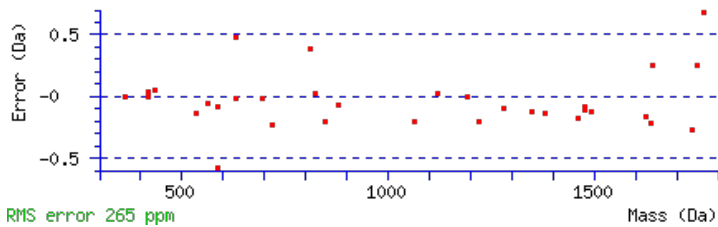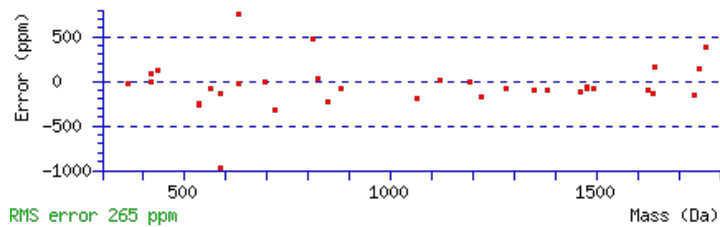

NCBI BLAST search of [GVNFNVSKVSSVEECQK](#)

(Parameters: blastp, nr protein database, expect=20000, no filter, PAM30)

Other BLAST [web gateways](#)

**All matches to this query**

| Score | Mr(calc)  | Delta   | Sequence                          | Site Analysis        |
|-------|-----------|---------|-----------------------------------|----------------------|
| 72.5  | 1910.9044 | 0.0093  | <a href="#">GVNFNVSKVSSVEECQK</a> | Deamidated N5 94.40% |
| 60.2  | 1910.9044 | 0.0093  | <a href="#">GVNFNVSKVSSVEECQK</a> | Deamidated N3 5.60%  |
| 31.1  | 1910.9044 | 0.0093  | <a href="#">GVNFNVSKVSSVEECQK</a> | Deamidated Q16 0.01% |
| 8.8   | 1910.9084 | 0.0053  | <a href="#">SENSLLDSIFWMAAPK</a>  |                      |
| 7.4   | 1910.9203 | -0.0067 | <a href="#">LSAGQSRFCGERQLMR</a>  |                      |
| 7.3   | 1909.9091 | 1.0046  | <a href="#">MDSTLAVQQYIQQNIR</a>  |                      |
| 6.9   | 1909.9091 | 1.0046  | <a href="#">MDSTLAVQQYIQQNIR</a>  |                      |
| 6.9   | 1909.9091 | 1.0046  | <a href="#">MDSTLAVQQYIQQNIR</a>  |                      |
| 5.7   | 1909.9091 | 1.0046  | <a href="#">MDSTLAVQQYIQQNIR</a>  |                      |
| 5.7   | 1909.9091 | 1.0046  | <a href="#">MDSTLAVQQYIQQNIR</a>  |                      |

Mascot: <http://www.matrixscience.com/>

# MATRIX SCIENCE Mascot Search Results

## Peptide View

MS/MS Fragmentation of **LQAPLNYTEFQKPICLPSK**

Found in **E9PBC5** in **con\_Xuniprot\_HUMAN3**, E9PBC5\_HUMAN Plasma kallikrein heavy chain OS=Homo sapiens GN=KLKB1 PE=2 SV=1

Match to Query 15081: 2247.168268 from(1124.591410,2+) intensity(27035.4980) rtinseconds(1710) scans(4328) index(1321)

Title: 111019\_Est\_ISCardio\_NMI\_YP\_G\_3Spectrum3768\_scans\_\_4328

Data file C:\mascot\20140703\_Tmgf\_1D\CSV\_UseAnalysis\MasterCSV\All\_Glyco\mgf\ptm\UC18ERLIC\_PTM\_35D.mgf

Click mouse within plot area to zoom in by factor of two about that point

Or, to Da

Label all possible matches Label matches used for scoring

Show Y-axis

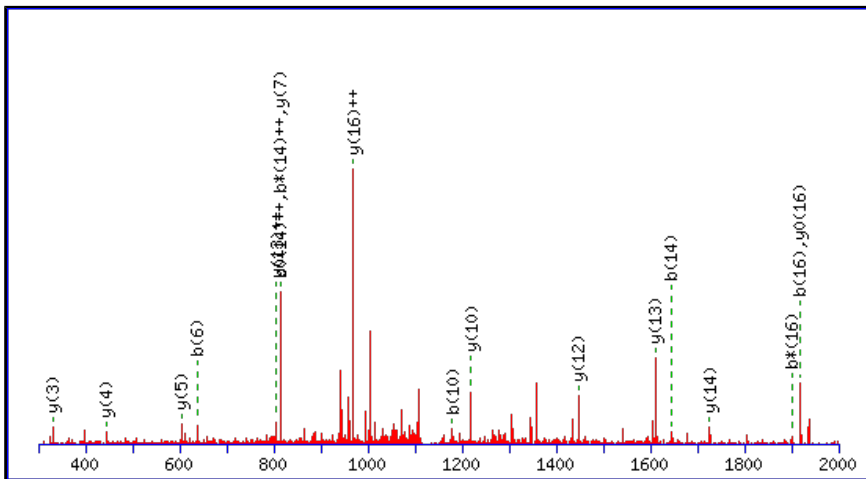

Monoisotopic mass of neutral peptide Mr(calc): 2247.1609

Fixed modifications: Carbamidomethyl (C) (apply to specified residues or termini only)

Variable modifications:

N6 : Deamidated (NQ)

Ions Score: 67 Expect: 4.9e-005

Matches : 18/198 fragment ions using 17 most intense peaks ([help](#))

| #  | b         | b <sup>++</sup> | b <sup>*</sup> | b <sup>*++</sup> | b <sup>0</sup> | b <sup>0++</sup> | Seq. | y         | y <sup>++</sup> | y <sup>*</sup> | y <sup>*++</sup> | y <sup>0</sup> | y <sup>0++</sup> | #  |
|----|-----------|-----------------|----------------|------------------|----------------|------------------|------|-----------|-----------------|----------------|------------------|----------------|------------------|----|
| 1  | 114.0913  | 57.5493         |                |                  |                |                  | L    |           |                 |                |                  |                |                  | 19 |
| 2  | 242.1499  | 121.5786        | 225.1234       | 113.0653         |                |                  | Q    | 2135.0842 | 1068.0457       | 2118.0576      | 1059.5324        | 2117.0736      | 1059.0404        | 18 |
| 3  | 313.1870  | 157.0972        | 296.1605       | 148.5839         |                |                  | A    | 2007.0256 | 1004.0164       | 1989.9990      | 995.5032         | 1989.0150      | 995.0111         | 17 |
| 4  | 410.2398  | 205.6235        | 393.2132       | 197.1103         |                |                  | P    | 1935.9885 | 968.4979        | 1918.9619      | 959.9846         | 1917.9779      | 959.4926         | 16 |
| 5  | 523.3239  | 262.1656        | 506.2973       | 253.6523         |                |                  | L    | 1838.9357 | 919.9715        | 1821.9092      | 911.4582         | 1820.9251      | 910.9662         | 15 |
| 6  | 638.3508  | 319.6790        | 621.3243       | 311.1658         |                |                  | N    | 1725.8516 | 863.4295        | 1708.8251      | 854.9162         | 1707.8411      | 854.4242         | 14 |
| 7  | 801.4141  | 401.2107        | 784.3876       | 392.6974         |                |                  | Y    | 1610.8247 | 805.9160        | 1593.7981      | 797.4027         | 1592.8141      | 796.9107         | 13 |
| 8  | 902.4618  | 451.7345        | 885.4353       | 443.2213         | 884.4512       | 442.7293         | T    | 1447.7614 | 724.3843        | 1430.7348      | 715.8710         | 1429.7508      | 715.3790         | 12 |
| 9  | 1031.5044 | 516.2558        | 1014.4779      | 507.7426         | 1013.4938      | 507.2506         | E    | 1346.7137 | 673.8605        | 1329.6871      | 665.3472         | 1328.7031      | 664.8552         | 11 |
| 10 | 1178.5728 | 589.7900        | 1161.5463      | 581.2768         | 1160.5623      | 580.7848         | F    | 1217.6711 | 609.3392        | 1200.6445      | 600.8259         | 1199.6605      | 600.3339         | 10 |
| 11 | 1306.6314 | 653.8193        | 1289.6048      | 645.3061         | 1288.6208      | 644.8141         | Q    | 1070.6027 | 535.8050        | 1053.5761      | 527.2917         | 1052.5921      | 526.7997         | 9  |
| 12 | 1434.7264 | 717.8668        | 1417.6998      | 709.3535         | 1416.7158      | 708.8615         | K    | 942.5441  | 471.7757        | 925.5176       | 463.2624         | 924.5335       | 462.7704         | 8  |
| 13 | 1531.7791 | 766.3932        | 1514.7526      | 757.8799         | 1513.7686      | 757.3879         | P    | 814.4491  | 407.7282        | 797.4226       | 399.2149         | 796.4386       | 398.7229         | 7  |
| 14 | 1644.8632 | 822.9352        | 1627.8366      | 814.4220         | 1626.8526      | 813.9299         | I    | 717.3964  | 359.2018        | 700.3698       | 350.6885         | 699.3858       | 350.1965         | 6  |
| 15 | 1804.8938 | 902.9506        | 1787.8673      | 894.4373         | 1786.8833      | 893.9453         | C    | 604.3123  | 302.6598        | 587.2858       | 294.1465         | 586.3017       | 293.6545         | 5  |
| 16 | 1917.9779 | 959.4926        | 1900.9514      | 950.9793         | 1899.9673      | 950.4873         | L    | 444.2817  | 222.6445        | 427.2551       | 214.1312         | 426.2711       | 213.6392         | 4  |
| 17 | 2015.0307 | 1008.0190       | 1998.0041      | 999.5057         | 1997.0201      | 999.0137         | P    | 331.1976  | 166.1024        | 314.1710       | 157.5892         | 313.1870       | 157.0972         | 3  |
| 18 | 2102.0627 | 1051.5350       | 2085.0361      | 1043.0217        | 2084.0521      | 1042.5297        | S    | 234.1448  | 117.5761        | 217.1183       | 109.0628         | 216.1343       | 108.5708         | 2  |
| 19 |           |                 |                |                  |                |                  | K    | 147.1128  | 74.0600         | 130.0863       | 65.5468          |                |                  | 1  |

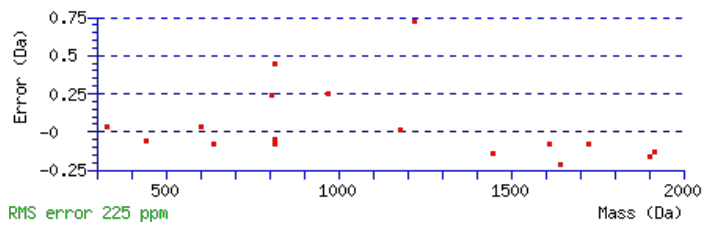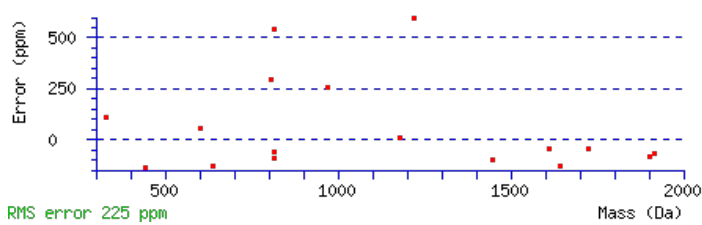

NCBI BLAST search of [LQAPLNYTEFQKPICLPSK](#)

(Parameters: blastp, nr protein database, expect=20000, no filter, PAM30)

Other BLAST [web gateways](#)

**All matches to this query**

| Score | Mr(calc)  | Delta  | Sequence                            | Site Analysis        |
|-------|-----------|--------|-------------------------------------|----------------------|
| 66.7  | 2247.1609 | 0.0074 | <a href="#">LQAPLNYTEFQKPICLPSK</a> | Deamidated N6 91.14% |
| 55.0  | 2247.1609 | 0.0074 | <a href="#">LQAPLNYTEFQKPICLPSK</a> | Deamidated Q11 6.12% |
| 51.5  | 2247.1609 | 0.0074 | <a href="#">LQAPLNYTEFQKPICLPSK</a> | Deamidated Q2 2.75%  |
| 3.0   | 2246.1735 | 0.9948 | <a href="#">ELKNIKFYAVQLYNYPSR</a>  |                      |

Mascot: <http://www.matrixscience.com/>

# MASCOT SCIENCE Mascot Search Results

## Peptide View

MS/MS Fragmentation of **GVNFNVSKVSSVEECQKR**

Found in **C9IYG8** in **con\_Xuniprot\_HUMAN3**, C9IYG8\_HUMAN Plasma kallikrein heavy chain (Fragment) OS=Homo sapiens  
GN=KLKB1 PE=2 SV=1

Match to Query 13125: 2067.010392 from(690.010740,3+) intensity(10894.8906) rtinseconds(885) scans(2011) index(23100)

Title: 111019\_Est\_MI\_YS\_G\_04Spectrum1687\_scans\_\_2011

Data file C:\mascot\20140703\_Tmgf\_1D\CSV\_UseAnalysis\MasterCSV\All\_Glyco\mgf\ptm\UC18ERLIC\_PTM\_35D.mgf

Click mouse within plot area to zoom in by factor of two about that point

Or, to Da

Label all possible matches Label matches used for scoring

Show Y-axis

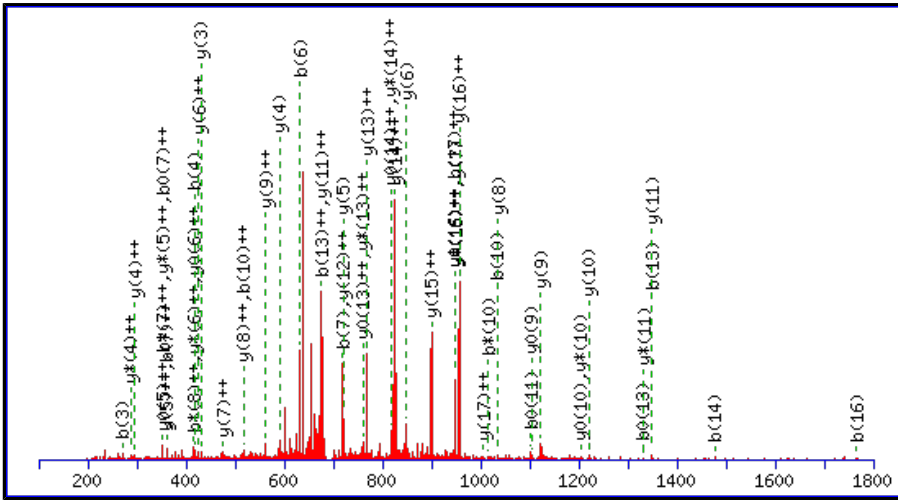

Monoisotopic mass of neutral peptide Mr(calc): 2067.0055

Fixed modifications: Carbamidomethyl (C) (apply to specified residues or termini only)

Variable modifications: N5 : Deamidated (NQ)

Ions Score: 58 Expect: 0.00046

Matches : 55/180 fragment ions using 105 most intense peaks ([help](#))

| #  | b         | b <sup>++</sup> | b <sup>*</sup> | b <sup>*++</sup> | b <sup>0</sup> | b <sup>0++</sup> | Seq. | y         | y <sup>++</sup> | y <sup>*</sup> | y <sup>*++</sup> | y <sup>0</sup> | y <sup>0++</sup> | #  |
|----|-----------|-----------------|----------------|------------------|----------------|------------------|------|-----------|-----------------|----------------|------------------|----------------|------------------|----|
| 1  | 58.0287   | 29.5180         |                |                  |                |                  | G    |           |                 |                |                  |                |                  | 18 |
| 2  | 157.0972  | 79.0522         |                |                  |                |                  | V    | 2010.9913 | 1005.9993       | 1993.9648      | 997.4860         | 1992.9808      | 996.9940         | 17 |
| 3  | 271.1401  | 136.0737        | 254.1135       | 127.5604         |                |                  | N    | 1911.9229 | 956.4651        | 1894.8964      | 947.9518         | 1893.9123      | 947.4598         | 16 |
| 4  | 418.2085  | 209.6079        | 401.1819       | 201.0946         |                |                  | F    | 1797.8800 | 899.4436        | 1780.8534      | 890.9304         | 1779.8694      | 890.4383         | 15 |
| 5  | 533.2354  | 267.1214        | 516.2089       | 258.6081         |                |                  | N    | 1650.8116 | 825.9094        | 1633.7850      | 817.3961         | 1632.8010      | 816.9041         | 14 |
| 6  | 632.3039  | 316.6556        | 615.2773       | 308.1423         |                |                  | V    | 1535.7846 | 768.3959        | 1518.7581      | 759.8827         | 1517.7741      | 759.3907         | 13 |
| 7  | 719.3359  | 360.1716        | 702.3093       | 351.6583         | 701.3253       | 351.1663         | S    | 1436.7162 | 718.8617        | 1419.6897      | 710.3485         | 1418.7056      | 709.8565         | 12 |
| 8  | 847.4308  | 424.2191        | 830.4043       | 415.7058         | 829.4203       | 415.2138         | K    | 1349.6842 | 675.3457        | 1332.6576      | 666.8325         | 1331.6736      | 666.3404         | 11 |
| 9  | 946.4993  | 473.7533        | 929.4727       | 465.2400         | 928.4887       | 464.7480         | V    | 1221.5892 | 611.2982        | 1204.5627      | 602.7850         | 1203.5786      | 602.2930         | 10 |
| 10 | 1033.5313 | 517.2693        | 1016.5047      | 508.7560         | 1015.5207      | 508.2640         | S    | 1122.5208 | 561.7640        | 1105.4942      | 553.2508         | 1104.5102      | 552.7588         | 9  |
| 11 | 1120.5633 | 560.7853        | 1103.5368      | 552.2720         | 1102.5527      | 551.7800         | S    | 1035.4888 | 518.2480        | 1018.4622      | 509.7347         | 1017.4782      | 509.2427         | 8  |
| 12 | 1219.6317 | 610.3195        | 1202.6052      | 601.8062         | 1201.6212      | 601.3142         | V    | 948.4567  | 474.7320        | 931.4302       | 466.2187         | 930.4462       | 465.7267         | 7  |
| 13 | 1348.6743 | 674.8408        | 1331.6478      | 666.3275         | 1330.6638      | 665.8355         | E    | 849.3883  | 425.1978        | 832.3618       | 416.6845         | 831.3778       | 416.1925         | 6  |
| 14 | 1477.7169 | 739.3621        | 1460.6904      | 730.8488         | 1459.7063      | 730.3568         | E    | 720.3457  | 360.6765        | 703.3192       | 352.1632         | 702.3352       | 351.6712         | 5  |
| 15 | 1637.7476 | 819.3774        | 1620.7210      | 810.8641         | 1619.7370      | 810.3721         | C    | 591.3031  | 296.1552        | 574.2766       | 287.6419         |                |                  | 4  |
| 16 | 1765.8061 | 883.4067        | 1748.7796      | 874.8934         | 1747.7956      | 874.4014         | Q    | 431.2725  | 216.1399        | 414.2459       | 207.6266         |                |                  | 3  |
| 17 | 1893.9011 | 947.4542        | 1876.8746      | 938.9409         | 1875.8905      | 938.4489         | K    | 303.2139  | 152.1106        | 286.1874       | 143.5973         |                |                  | 2  |
| 18 |           |                 |                |                  |                |                  | R    | 175.1190  | 88.0631         | 158.0924       | 79.5498          |                |                  | 1  |

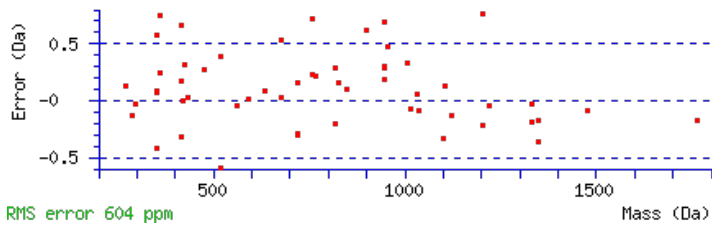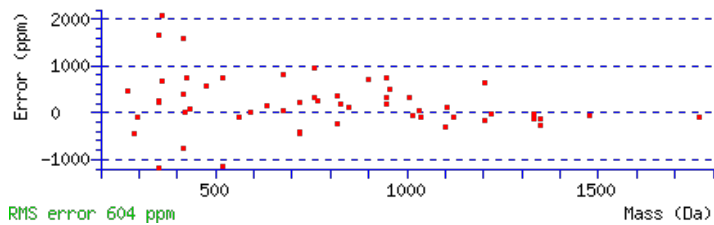

NCBI **BLAST** search of [GVNFNVSKVSSVEECQKR](#)

(Parameters: blastp, nr protein database, expect=20000, no filter, PAM30)

Other BLAST [web gateways](#)

**All matches to this query**

| Score | Mr(calc)  | Delta  | Sequence                            | Site Analysis         |
|-------|-----------|--------|-------------------------------------|-----------------------|
| 57.6  | 2067.0055 | 0.0049 | <a href="#">GVNFNVSKVSSVEECQKR</a>  | Deamidated N5 42.93%  |
| 56.8  | 2067.0055 | 0.0049 | <a href="#">GVNFNVSKVSSVEECQKR</a>  | Deamidated Q16 35.95% |
| 54.5  | 2067.0055 | 0.0049 | <a href="#">GVNFNVSKVSSVEECQKR</a>  | Deamidated N3 21.12%  |
| 10.7  | 2066.0069 | 1.0035 | <a href="#">EEHAEQLQSIIRTLFDH</a>   |                       |
| 10.7  | 2066.0069 | 1.0035 | <a href="#">EEHAEQLQSIIRTLFDH</a>   |                       |
| 4.2   | 2067.0095 | 0.0009 | <a href="#">ESISQSNYPMVNSVFIPR</a>  |                       |
| 3.9   | 2067.0008 | 0.0096 | <a href="#">SLEHKTQTPPVEENVVTQK</a> |                       |
| 2.8   | 2066.0028 | 1.0076 | <a href="#">TALQGDQYRSNIAQQRSK</a>  |                       |
| 2.6   | 2066.0028 | 1.0076 | <a href="#">TALQGDQYRSNIAQQRSK</a>  |                       |
| 2.1   | 2066.0028 | 1.0076 | <a href="#">TALQGDQYRSNIAQQRSK</a>  |                       |

Mascot: <http://www.matrixscience.com/>



# MASCOT SCIENCE Mascot Search Results

## Peptide View

MS/MS Fragmentation of **GVNFNVSK**

Found in **C9IYG8** in **con\_Xuniprot\_HUMAN3**, C9IYG8\_HUMAN Plasma kallikrein heavy chain (Fragment) OS=Homo sapiens GN=KLKB1 PE=2 SV=1

Match to Query 9: 864.435768 from(433.225160,2+) intensity(277389.1875) rtinseconds(469) scans(1065) index(19320)

Title: 111019\_Est\_MI\_YP\_G\_09Spectrum927\_scans\_\_1065

Data file C:\mascot\20140703\_Tmgf\_1D\CSV\_UseAnalysis\MasterCSV\All\_Glyco\mgf\ptm\UC18ERLIC\_PTM\_35D.mgf

Click mouse within plot area to zoom in by factor of two about that point

Or, to Da

Label all possible matches Label matches used for scoring

Show Y-axis

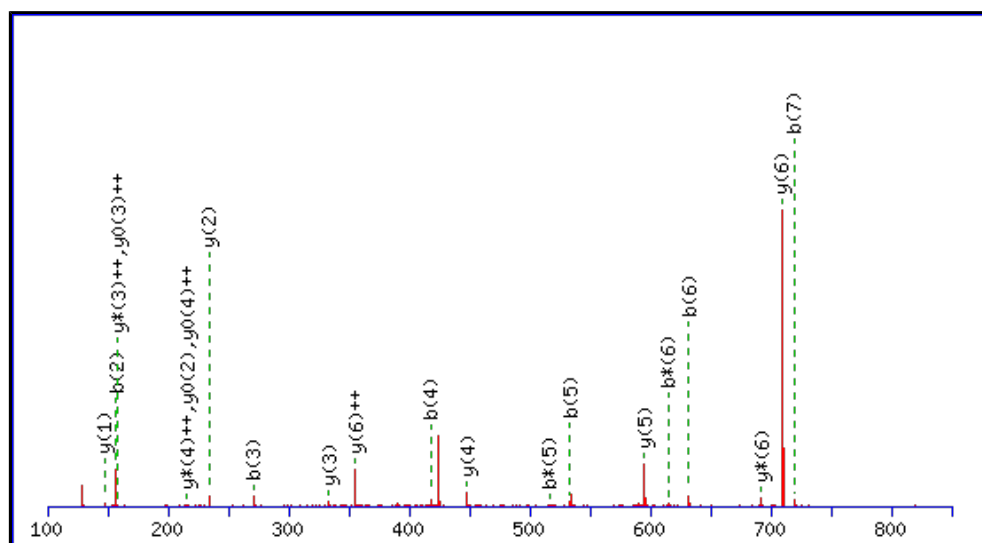

Monoisotopic mass of neutral peptide  $M_r(\text{calc})$ : 864.4341

Fixed modifications: Carbamidomethyl (C) (apply to specified residues or termini only)

Variable modifications:

N5 : Deamidated (NQ)

Ions Score: 39 Expect: 0.021

Matches : 21/66 fragment ions using 33 most intense peaks ([help](#))

| # | b               | b <sup>++</sup> | b*              | b <sup>***</sup> | b <sup>0</sup> | b <sup>0++</sup> | Seq. | y               | y <sup>++</sup> | y*              | y <sup>***</sup> | y <sup>0</sup>  | y <sup>0++</sup> | # |
|---|-----------------|-----------------|-----------------|------------------|----------------|------------------|------|-----------------|-----------------|-----------------|------------------|-----------------|------------------|---|
| 1 | 58.0287         | 29.5180         |                 |                  |                |                  | G    |                 |                 |                 |                  |                 |                  | 8 |
| 2 | <b>157.0972</b> | 79.0522         |                 |                  |                |                  | V    | 808.4199        | 404.7136        | 791.3934        | 396.2003         | 790.4094        | 395.7083         | 7 |
| 3 | <b>271.1401</b> | 136.0737        | 254.1135        | 127.5604         |                |                  | N    | <b>709.3515</b> | <b>355.1794</b> | <b>692.3250</b> | 346.6661         | 691.3410        | 346.1741         | 6 |
| 4 | <b>418.2085</b> | 209.6079        | 401.1819        | 201.0946         |                |                  | F    | <b>595.3086</b> | 298.1579        | 578.2821        | 289.6447         | 577.2980        | 289.1527         | 5 |
| 5 | <b>533.2354</b> | 267.1214        | <b>516.2089</b> | 258.6081         |                |                  | N    | <b>448.2402</b> | 224.6237        | 431.2136        | <b>216.1105</b>  | 430.2296        | <b>215.6184</b>  | 4 |
| 6 | <b>632.3039</b> | 316.6556        | <b>615.2773</b> | 308.1423         |                |                  | V    | <b>333.2132</b> | 167.1103        | 316.1867        | <b>158.5970</b>  | 315.2027        | <b>158.1050</b>  | 3 |
| 7 | <b>719.3359</b> | 360.1716        | 702.3093        | 351.6583         | 701.3253       | 351.1663         | S    | <b>234.1448</b> | 117.5761        | 217.1183        | 109.0628         | <b>216.1343</b> | 108.5708         | 2 |
| 8 |                 |                 |                 |                  |                |                  | K    | <b>147.1128</b> | 74.0600         | 130.0863        | 65.5468          |                 |                  | 1 |

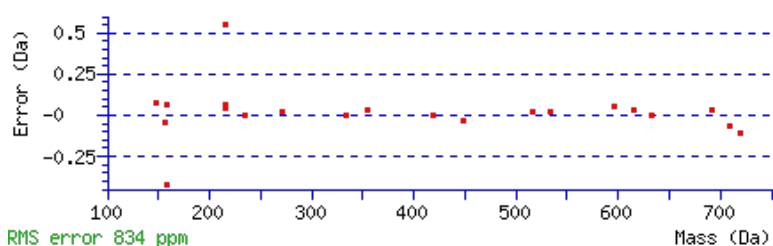

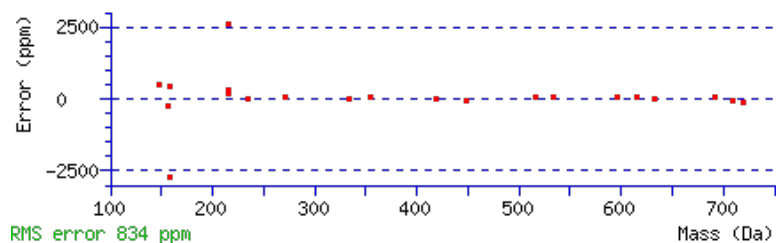

NCBI **BLAST** search of [GVNFENVSK](#)

(Parameters: blastp, nr protein database, expect=20000, no filter, PAM30)

Other BLAST [web gateways](#)

**All matches to this query**

| Score | Mr(calc) | Delta   | Sequence                  | Site Analysis        |
|-------|----------|---------|---------------------------|----------------------|
| 39.5  | 864.4341 | 0.0016  | <a href="#">GVNFENVSK</a> | Deamidated N5 96.03% |
| 25.6  | 864.4341 | 0.0016  | <a href="#">GVNFENVSK</a> | Deamidated N3 3.97%  |
| 13.9  | 864.4314 | 0.0043  | <a href="#">RNPQHGR</a>   |                      |
| 13.8  | 864.4388 | -0.0031 | <a href="#">RNCIFR</a>    |                      |
| 12.1  | 864.4341 | 0.0017  | <a href="#">KAAEGFDK</a>  |                      |
| 12.1  | 864.4341 | 0.0016  | <a href="#">QAEFGVSK</a>  |                      |
| 10.6  | 864.4375 | -0.0017 | <a href="#">KGMNGTLK</a>  |                      |
| 10.3  | 864.4341 | 0.0017  | <a href="#">GVYNGINK</a>  |                      |
| 9.3   | 864.4375 | -0.0017 | <a href="#">KMKEGEK</a>   |                      |
| 8.2   | 862.4257 | 2.0101  | <a href="#">RNTTGTGR</a>  |                      |

Mascot: <http://www.matrixscience.com/>

# MATRIX SCIENCE Mascot Search Results

## Peptide View

MS/MS Fragmentation of **VASVININPNTTHSTGSCR**

Found in **B4E2S7** in **con\_Xuniprot\_HUMAN3**, B4E2S7\_HUMAN Lysosome-associated membrane glycoprotein 2 OS=Homo sapiens  
GN=LAMP2 PE=2 SV=1

Match to Query 12760: 2027.976822 from(676.999550,3+) intensity(74919.8359) rtinseconds(756) scans(1673) index(25196)

Title: 111019\_Est\_MI\_YS\_G\_07Spectrum1398\_scans\_1673

Data file C:\mascot\20140703\_Tmgf\_1D\CSV\_UseAnalysis\MasterCSV\All\_Glyco\mgf\ptm\UC18ERLIC\_PTM\_35D.mgf

Click mouse within plot area to zoom in by factor of two about that point

Or, to Da

Label all possible matches Label matches used for scoring

Show Y-axis

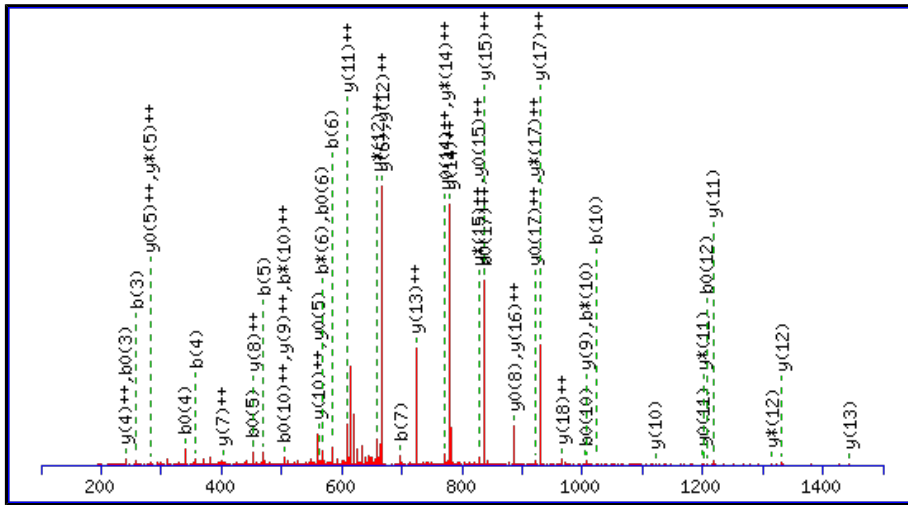

Monoisotopic mass of neutral peptide Mr(calc): 2027.9695

Fixed modifications: Carbamidomethyl (C) (apply to specified residues or termini only)

Variable modifications:

N10 : Deamidated (NQ)

Ions Score: 74 Expect: 9.5e-006

Matches : 50/198 fragment ions using 84 most intense peaks ([help](#))

| #  | b         | b <sup>++</sup> | b <sup>*</sup> | b <sup>*++</sup> | b <sup>0</sup> | b <sup>0++</sup> | Seq. | y         | y <sup>++</sup> | y <sup>*</sup> | y <sup>*++</sup> | y <sup>0</sup> | y <sup>0++</sup> | #  |
|----|-----------|-----------------|----------------|------------------|----------------|------------------|------|-----------|-----------------|----------------|------------------|----------------|------------------|----|
| 1  | 100.0757  | 50.5415         |                |                  |                |                  | V    |           |                 |                |                  |                |                  | 19 |
| 2  | 171.1128  | 86.0600         |                |                  |                |                  | A    | 1929.9083 | 965.4578        | 1912.8818      | 956.9445         | 1911.8978      | 956.4525         | 18 |
| 3  | 258.1448  | 129.5761        |                |                  | 240.1343       | 120.5708         | S    | 1858.8712 | 929.9392        | 1841.8447      | 921.4260         | 1840.8606      | 920.9340         | 17 |
| 4  | 357.2132  | 179.1103        |                |                  | 339.2027       | 170.1050         | V    | 1771.8392 | 886.4232        | 1754.8126      | 877.9100         | 1753.8286      | 877.4179         | 16 |
| 5  | 470.2973  | 235.6523        |                |                  | 452.2867       | 226.6470         | I    | 1672.7708 | 836.8890        | 1655.7442      | 828.3757         | 1654.7602      | 827.8837         | 15 |
| 6  | 584.3402  | 292.6738        | 567.3137       | 284.1605         | 566.3297       | 283.6685         | N    | 1559.6867 | 780.3470        | 1542.6601      | 771.8337         | 1541.6761      | 771.3417         | 14 |
| 7  | 697.4243  | 349.2158        | 680.3978       | 340.7025         | 679.4137       | 340.2105         | I    | 1445.6438 | 723.3255        | 1428.6172      | 714.8122         | 1427.6332      | 714.3202         | 13 |
| 8  | 811.4672  | 406.2373        | 794.4407       | 397.7240         | 793.4567       | 397.2320         | N    | 1332.5597 | 666.7835        | 1315.5332      | 658.2702         | 1314.5491      | 657.7782         | 12 |
| 9  | 908.5200  | 454.7636        | 891.4934       | 446.2504         | 890.5094       | 445.7584         | P    | 1218.5168 | 609.7620        | 1201.4902      | 601.2488         | 1200.5062      | 600.7567         | 11 |
| 10 | 1023.5469 | 512.2771        | 1006.5204      | 503.7638         | 1005.5364      | 503.2718         | N    | 1121.4640 | 561.2356        | 1104.4375      | 552.7224         | 1103.4534      | 552.2304         | 10 |
| 11 | 1124.5946 | 562.8009        | 1107.5681      | 554.2877         | 1106.5840      | 553.7957         | T    | 1006.4371 | 503.7222        | 989.4105       | 495.2089         | 988.4265       | 494.7169         | 9  |
| 12 | 1225.6423 | 613.3248        | 1208.6157      | 604.8115         | 1207.6317      | 604.3195         | T    | 905.3894  | 453.1983        | 888.3628       | 444.6851         | 887.3788       | 444.1931         | 8  |
| 13 | 1362.7012 | 681.8542        | 1345.6747      | 673.3410         | 1344.6906      | 672.8490         | H    | 804.3417  | 402.6745        | 787.3152       | 394.1612         | 786.3311       | 393.6692         | 7  |
| 14 | 1449.7332 | 725.3703        | 1432.7067      | 716.8570         | 1431.7227      | 716.3650         | S    | 667.2828  | 334.1450        | 650.2563       | 325.6318         | 649.2722       | 325.1398         | 6  |
| 15 | 1550.7809 | 775.8941        | 1533.7544      | 767.3808         | 1532.7703      | 766.8888         | T    | 580.2508  | 290.6290        | 563.2242       | 282.1157         | 562.2402       | 281.6237         | 5  |
| 16 | 1607.8024 | 804.4048        | 1590.7758      | 795.8916         | 1589.7918      | 795.3995         | G    | 479.2031  | 240.1052        | 462.1765       | 231.5919         | 461.1925       | 231.0999         | 4  |
| 17 | 1694.8344 | 847.9208        | 1677.8079      | 839.4076         | 1676.8238      | 838.9156         | S    | 422.1816  | 211.5945        | 405.1551       | 203.0812         | 404.1711       | 202.5892         | 3  |
| 18 | 1854.8651 | 927.9362        | 1837.8385      | 919.4229         | 1836.8545      | 918.9309         | C    | 335.1496  | 168.0784        | 318.1231       | 159.5652         |                |                  | 2  |
| 19 |           |                 |                |                  |                |                  | R    | 175.1190  | 88.0631         | 158.0924       | 79.5498          |                |                  | 1  |

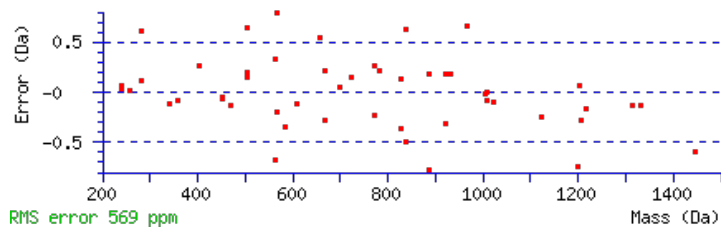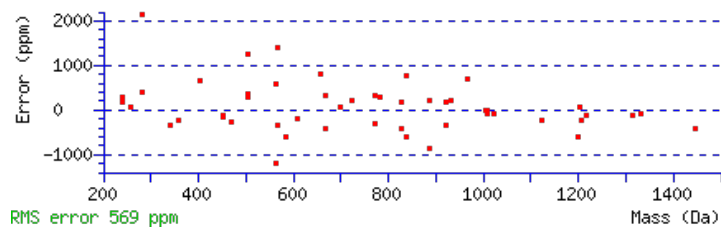

NCBI BLAST search of [VASVININPNTTHSTGSCR](#)

(Parameters: blastp, nr protein database, expect=20000, no filter, PAM30)

Other BLAST [web gateways](#)

**All matches to this query**

| Score | Mr(calc)  | Delta   | Sequence                            | Site Analysis         |
|-------|-----------|---------|-------------------------------------|-----------------------|
| 73.9  | 2027.9695 | 0.0074  | <a href="#">VASVININPNTTHSTGSCR</a> | Deamidated N10 93.21% |
| 61.1  | 2027.9695 | 0.0074  | <a href="#">VASVININPNTTHSTGSCR</a> | Deamidated N8 4.91%   |
| 56.9  | 2027.9695 | 0.0074  | <a href="#">VASVININPNTTHSTGSCR</a> | Deamidated N6 1.87%   |
| 13.4  | 2025.9677 | 2.0091  | <a href="#">IASDLTRSQDLMINSSQE</a>  |                       |
| 11.6  | 2025.9677 | 2.0091  | <a href="#">IASDLTRSQDLMINSSQE</a>  |                       |
| 11.0  | 2027.9690 | 0.0078  | <a href="#">LRSLLLNSCTGTSCCTMI</a>  |                       |
| 11.0  | 2027.9690 | 0.0078  | <a href="#">LRSLLLNSCTGTSCCTML</a>  |                       |
| 10.7  | 2025.9677 | 2.0091  | <a href="#">IASDLTRSQDLMINSSQE</a>  |                       |
| 9.2   | 2027.9807 | -0.0038 | <a href="#">RVDNQMSERITVNNNAHK</a>  |                       |
| 7.8   | 2027.9669 | 0.0099  | <a href="#">LIGRHWNEQMLDIACR</a>    |                       |

Mascot: <http://www.matrixscience.com/>

# MATRIX SCIENCE Mascot Search Results

## Peptide View

MS/MS Fragmentation of **EHEAQSNASLDVFLGHTNVEELMK**

Found in **H0YFH3** in **con\_Xuniprot\_HUMAN3**, H0YFH3\_HUMAN Complement C1r subcomponent OS=Homo sapiens GN=C1R PE=2 SV=1

Match to Query 25369: 2714.254416 from(679.570880,4+) intensity(40981.7188) rtinseconds(1595) scans(3978) index(14515)

Title: 111019\_Est\_ML\_YP\_G\_03Spectrum3433\_scans\_\_3978

Data file C:\mascot\20140703\_Tmgf\_1D\CSV\_UseAnalysis\MasterCSV\All\_Glyco\mgf\ptm\UC18ERLIC\_PTM\_35D.mgf

Click mouse within plot area to zoom in by factor of two about that point

Or, to Da

Label all possible matches Label matches used for scoring

Show Y-axis

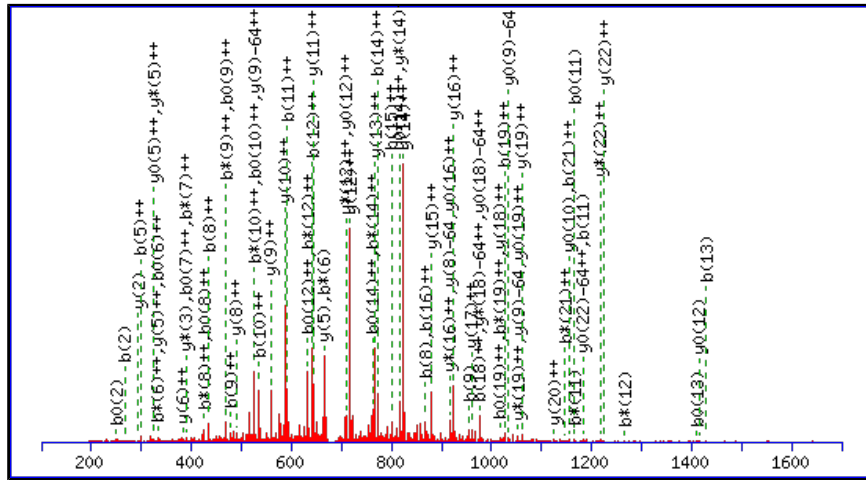

Monoisotopic mass of neutral peptide Mr(calc): 2714.2493

Fixed modifications: Carbamidomethyl (C) (apply to specified residues or termini only)

Variable modifications:

N7 : Deamidated (NQ)

M23 : Oxidation (M), with neutral losses 0.0000(shown in table), 63.9983

Ions Score: 76 Expect: 4.9e-006

Matches : 79/396 fragment ions using 107 most intense peaks ([help](#))

| #  | b                | b <sup>++</sup>  | b <sup>*</sup>   | b <sup>*++</sup> | b <sup>0</sup>   | b <sup>0++</sup> | Seq. | y               | y <sup>++</sup>  | y <sup>*</sup>  | y <sup>*++</sup> | y <sup>0</sup>   | y <sup>0++</sup> | #  |
|----|------------------|------------------|------------------|------------------|------------------|------------------|------|-----------------|------------------|-----------------|------------------|------------------|------------------|----|
| 1  | 130.0499         | 65.5286          |                  |                  | 112.0393         | 56.5233          | E    |                 |                  |                 |                  |                  |                  | 24 |
| 2  | <b>267.1088</b>  | 134.0580         |                  |                  | <b>249.0982</b>  | 125.0527         | H    | 2586.2141       | 1293.6107        | 2569.1875       | 1285.0974        | 2568.2035        | 1284.6054        | 23 |
| 3  | 396.1514         | 198.5793         |                  |                  | 378.1408         | 189.5740         | E    | 2449.1551       | <b>1225.0812</b> | 2432.1286       | <b>1216.5679</b> | 2431.1446        | 1216.0759        | 22 |
| 4  | 467.1885         | 234.0979         |                  |                  | 449.1779         | 225.0926         | A    | 2320.1126       | 1160.5599        | 2303.0860       | 1152.0466        | 2302.1020        | 1151.5546        | 21 |
| 5  | 595.2471         | <b>298.1272</b>  | 578.2205         | 289.6139         | 577.2365         | 289.1219         | Q    | 2249.0754       | <b>1125.0414</b> | 2232.0489       | 1116.5281        | 2231.0649        | 1116.0361        | 20 |
| 6  | 682.2791         | 341.6432         | <b>665.2525</b>  | <b>333.1299</b>  | 664.2685         | <b>332.6379</b>  | S    | 2121.0169       | <b>1061.0121</b> | 2103.9903       | <b>1052.4988</b> | 2103.0063        | <b>1052.0068</b> | 19 |
| 7  | 797.3060         | 399.1567         | 780.2795         | <b>390.6434</b>  | 779.2955         | <b>390.1514</b>  | N    | 2033.9848       | <b>1017.4961</b> | 2016.9583       | 1008.9828        | 2015.9743        | 1008.4908        | 18 |
| 8  | <b>868.3432</b>  | <b>434.6752</b>  | 851.3166         | <b>426.1619</b>  | 850.3326         | <b>425.6699</b>  | A    | 1918.9579       | <b>959.9826</b>  | 1901.9313       | 951.4693         | 1900.9473        | 950.9773         | 17 |
| 9  | <b>955.3752</b>  | <b>478.1912</b>  | 938.3486         | <b>469.6780</b>  | 937.3646         | <b>469.1859</b>  | S    | 1847.9208       | <b>924.4640</b>  | 1830.8942       | <b>915.9508</b>  | 1829.9102        | <b>915.4587</b>  | 16 |
| 10 | 1068.4592        | <b>534.7333</b>  | 1051.4327        | <b>526.2200</b>  | 1050.4487        | <b>525.7280</b>  | L    | 1760.8887       | <b>880.9480</b>  | 1743.8622       | 872.4347         | 1742.8782        | 871.9427         | 15 |
| 11 | <b>1183.4862</b> | <b>592.2467</b>  | <b>1166.4596</b> | 583.7335         | <b>1165.4756</b> | 583.2414         | D    | 1647.8047       | <b>824.4060</b>  | 1630.7781       | <b>815.8927</b>  | 1629.7941        | <b>815.4007</b>  | 14 |
| 12 | 1282.5546        | <b>641.7809</b>  | <b>1265.5281</b> | <b>633.2677</b>  | 1264.5440        | <b>632.7757</b>  | V    | 1532.7777       | <b>766.8925</b>  | 1515.7512       | 758.3792         | 1514.7672        | 757.8872         | 13 |
| 13 | <b>1429.6230</b> | 715.3151         | 1412.5965        | 706.8019         | <b>1411.6124</b> | 706.3099         | F    | 1433.7093       | <b>717.3583</b>  | 1416.6828       | <b>708.8450</b>  | <b>1415.6988</b> | <b>708.3530</b>  | 12 |
| 14 | 1542.7071        | <b>771.8572</b>  | 1525.6805        | <b>763.3439</b>  | 1524.6965        | <b>762.8519</b>  | L    | 1286.6409       | <b>643.8241</b>  | 1269.6144       | 635.3108         | 1268.6303        | 634.8188         | 11 |
| 15 | 1599.7285        | <b>800.3679</b>  | 1582.7020        | 791.8546         | 1581.7180        | 791.3626         | G    | 1173.5569       | <b>587.2821</b>  | 1156.5303       | 578.7688         | <b>1155.5463</b> | 578.2768         | 10 |
| 16 | 1736.7875        | <b>868.8974</b>  | 1719.7609        | 860.3841         | 1718.7769        | 859.8921         | H    | 1116.5354       | <b>558.7713</b>  | 1099.5088       | 550.2581         | 1098.5248        | 549.7660         | 9  |
| 17 | 1837.8351        | 919.4212         | 1820.8086        | 910.9079         | 1819.8246        | 910.4159         | T    | 979.4765        | <b>490.2419</b>  | 962.4499        | 481.7286         | 961.4659         | 481.2366         | 8  |
| 18 | 1951.8781        | <b>976.4427</b>  | 1934.8515        | 967.9294         | 1933.8675        | 967.4374         | N    | 878.4288        | 439.7180         | 861.4022        | 431.2048         | 860.4182         | 430.7128         | 7  |
| 19 | 2050.9465        | <b>1025.9769</b> | 2033.9199        | <b>1017.4636</b> | 2032.9359        | <b>1016.9716</b> | V    | 764.3859        | <b>382.6966</b>  | 747.3593        | 374.1833         | 746.3753         | 373.6913         | 6  |
| 20 | 2179.9891        | 1090.4982        | 2162.9625        | 1081.9849        | 2161.9785        | 1081.4929        | E    | <b>665.3175</b> | <b>333.1624</b>  | 648.2909        | <b>324.6491</b>  | 647.3069         | <b>324.1571</b>  | 5  |
| 21 | 2309.0317        | <b>1155.0195</b> | 2292.0051        | <b>1146.5062</b> | 2291.0211        | 1146.0142        | E    | 536.2749        | 268.6411         | 519.2483        | 260.1278         | 518.2643         | 259.6358         | 4  |
| 22 | 2422.1157        | 1211.5615        | 2405.0892        | 1203.0482        | 2404.1052        | 1202.5562        | L    | 407.2323        | 204.1198         | <b>390.2057</b> | 195.6065         |                  |                  | 3  |

|    |           |           |           |           |           |           |   |          |          |          |          |  |  |   |
|----|-----------|-----------|-----------|-----------|-----------|-----------|---|----------|----------|----------|----------|--|--|---|
| 23 | 2569.1511 | 1285.0792 | 2552.1246 | 1276.5659 | 2551.1406 | 1276.0739 | M | 294.1482 | 147.5777 | 277.1217 | 139.0645 |  |  | 2 |
| 24 |           |           |           |           |           |           | K | 147.1128 | 74.0600  | 130.0863 | 65.5468  |  |  | 1 |

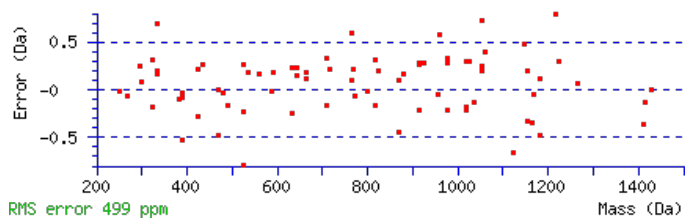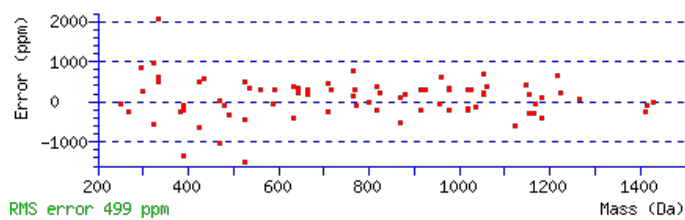

NCBI **BLAST** search of [EHEAQSNASLDVFLGHTNVEELMK](#)  
 (Parameters: blastp, nr protein database, expect=20000, no filter, PAM30)  
 Other BLAST [web gateways](#)

**All matches to this query**

| Score | Mr(calc)  | Delta  | Sequence                                  | Site Analysis        |
|-------|-----------|--------|-------------------------------------------|----------------------|
| 76.3  | 2714.2493 | 0.0051 | <a href="#">EHEAQSNASLDVFLGHTNVEELMK</a>  | Deamidated N7 87.14% |
| 67.8  | 2714.2493 | 0.0051 | <a href="#">EHEAQSNASLDVFLGHTNVEELMK</a>  | Deamidated Q5 12.37% |
| 53.8  | 2714.2493 | 0.0051 | <a href="#">EHEAQSNASLDVFLGHTNVEELMK</a>  | Deamidated N18 0.50% |
| 6.5   | 2712.2602 | 1.9942 | <a href="#">MEADLSGENIDAPRWDQRTEFLGR</a>  |                      |
| 5.9   | 2713.2649 | 0.9895 | <a href="#">AVDDGKPQLIDSAMDMLDIGATFMK</a> |                      |
| 5.9   | 2714.2489 | 0.0055 | <a href="#">AVDDGKPQLIDSAMDMLDIGATFMK</a> |                      |
| 5.5   | 2713.2509 | 1.0035 | <a href="#">YMMDLLNGLSQATCATEQIPARGR</a>  |                      |
| 5.1   | 2712.2597 | 1.9947 | <a href="#">MDIDAPDVEVQGPDWHLKMPKMK</a>   |                      |
| 5.0   | 2713.2509 | 1.0035 | <a href="#">YMMDLLNGLSQATCATEQIPARGR</a>  |                      |
| 4.8   | 2713.2509 | 1.0035 | <a href="#">YMMDLLNGLSQATCATEQIPARGR</a>  |                      |

Mascot: <http://www.matrixscience.com/>

# MATRIX SCIENCE Mascot Search Results

## Peptide View

MS/MS Fragmentation of **EHEAQSNASLDVFLGHTNVEELMK**

Found in **H0YFH3** in **con\_Xuniprot\_HUMAN3**, H0YFH3\_HUMAN Complement C1r subcomponent OS=Homo sapiens GN=C1R PE=2 SV=1

Match to Query 25335: 2698.268172 from(900.430000,3+) intensity(57492.3398) rtinseconds(1991) scans(5078) index(14651)

Title: 111019\_Est\_ML\_YP\_G\_03Spectrum4412\_scans\_5078

Data file C:\mascot\20140703\_Tmgf\_1D\CSV\_UseAnalysis\MasterCSV\All\_Glyco\mgf\ptm\UC18ERLIC\_PTM\_35D.mgf

Click mouse within plot area to zoom in by factor of two about that point

Or, to Da

Label all possible matches Label matches used for scoring

Show Y-axis

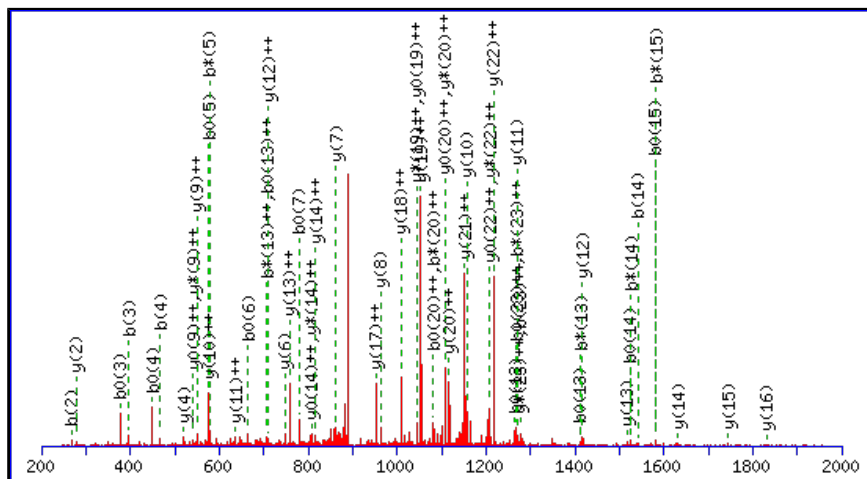

Monoisotopic mass of neutral peptide  $M_r(\text{calc})$ : 2698.2544

Fixed modifications: Carbamidomethyl (C) (apply to specified residues or termini only)

Variable modifications:

N7 : Deamidated (NQ)

Ions Score: 76 Expect: 6.4e-006

Matches : 59/262 fragment ions using 103 most intense peaks (help)

| #  | b                | b <sup>++</sup>  | b <sup>*</sup>   | b <sup>*++</sup> | b <sup>0</sup>   | b <sup>0++</sup> | Seq. | y                | y <sup>++</sup>  | y <sup>*</sup> | y <sup>*++</sup> | y <sup>0</sup> | y <sup>0++</sup> | #  |
|----|------------------|------------------|------------------|------------------|------------------|------------------|------|------------------|------------------|----------------|------------------|----------------|------------------|----|
| 1  | 130.0499         | 65.5286          |                  |                  | 112.0393         | 56.5233          | E    |                  |                  |                |                  |                |                  | 24 |
| 2  | <b>267.1088</b>  | 134.0580         |                  |                  | 249.0982         | 125.0527         | H    | 2570.2191        | 1285.6132        | 2553.1926      | <b>1277.0999</b> | 2552.2086      | 1276.6079        | 23 |
| 3  | <b>396.1514</b>  | 198.5793         |                  |                  | <b>378.1408</b>  | 189.5740         | E    | 2433.1602        | <b>1217.0838</b> | 2416.1337      | <b>1208.5705</b> | 2415.1497      | <b>1208.0785</b> | 22 |
| 4  | <b>467.1885</b>  | 234.0979         |                  |                  | <b>449.1779</b>  | 225.0926         | A    | 2304.1176        | <b>1152.5625</b> | 2287.0911      | 1144.0492        | 2286.1071      | 1143.5572        | 21 |
| 5  | 595.2471         | 298.1272         | <b>578.2205</b>  | 289.6139         | <b>577.2365</b>  | 289.1219         | Q    | 2233.0805        | <b>1117.0439</b> | 2216.0540      | <b>1108.5306</b> | 2215.0700      | <b>1108.0386</b> | 20 |
| 6  | 682.2791         | 341.6432         | 665.2525         | 333.1299         | <b>664.2685</b>  | 332.6379         | S    | 2105.0219        | <b>1053.0146</b> | 2087.9954      | <b>1044.5013</b> | 2087.0114      | <b>1044.0093</b> | 19 |
| 7  | 797.3060         | 399.1567         | 780.2795         | 390.6434         | <b>779.2955</b>  | 390.1514         | N    | 2017.9899        | <b>1009.4986</b> | 2000.9634      | 1000.9853        | 1999.9794      | 1000.4933        | 18 |
| 8  | 868.3432         | 434.6752         | 851.3166         | 426.1619         | 850.3326         | 425.6699         | A    | 1902.9630        | <b>951.9851</b>  | 1885.9364      | 943.4719         | 1884.9524      | 942.9798         | 17 |
| 9  | 955.3752         | 478.1912         | 938.3486         | 469.6780         | 937.3646         | 469.1859         | S    | <b>1831.9259</b> | 916.4666         | 1814.8993      | 907.9533         | 1813.9153      | 907.4613         | 16 |
| 10 | 1068.4592        | 534.7333         | 1051.4327        | 526.2200         | 1050.4487        | 525.7280         | L    | <b>1744.8938</b> | 872.9506         | 1727.8673      | 864.4373         | 1726.8833      | 863.9453         | 15 |
| 11 | 1183.4862        | 592.2467         | 1166.4596        | 583.7335         | 1165.4756        | 583.2414         | D    | <b>1631.8098</b> | <b>816.4085</b>  | 1614.7832      | <b>807.8952</b>  | 1613.7992      | <b>807.4032</b>  | 14 |
| 12 | 1282.5546        | 641.7809         | 1265.5281        | 633.2677         | <b>1264.5440</b> | 632.7757         | V    | <b>1516.7828</b> | <b>758.8951</b>  | 1499.7563      | 750.3818         | 1498.7723      | 749.8898         | 13 |
| 13 | 1429.6230        | 715.3151         | <b>1412.5965</b> | <b>706.8019</b>  | <b>1411.6124</b> | <b>706.3099</b>  | F    | <b>1417.7144</b> | <b>709.3608</b>  | 1400.6879      | 700.8476         | 1399.7038      | 700.3556         | 12 |
| 14 | <b>1542.7071</b> | 771.8572         | <b>1525.6805</b> | 763.3439         | <b>1524.6965</b> | 762.8519         | L    | <b>1270.6460</b> | <b>635.8266</b>  | 1253.6195      | 627.3134         | 1252.6354      | 626.8214         | 11 |
| 15 | 1599.7285        | 800.3679         | <b>1582.7020</b> | 791.8546         | <b>1581.7180</b> | 791.3626         | G    | <b>1157.5619</b> | <b>579.2846</b>  | 1140.5354      | 570.7713         | 1139.5514      | 570.2793         | 10 |
| 16 | 1736.7875        | 868.8974         | 1719.7609        | 860.3841         | 1718.7769        | 859.8921         | H    | 1100.5405        | <b>550.7739</b>  | 1083.5139      | <b>542.2606</b>  | 1082.5299      | <b>541.7686</b>  | 9  |
| 17 | 1837.8351        | 919.4212         | 1820.8086        | 910.9079         | 1819.8246        | 910.4159         | T    | <b>963.4816</b>  | 482.2444         | 946.4550       | 473.7311         | 945.4710       | 473.2391         | 8  |
| 18 | 1951.8781        | 976.4427         | 1934.8515        | 967.9294         | 1933.8675        | 967.4374         | N    | <b>862.4339</b>  | 431.7206         | 845.4073       | 423.2073         | 844.4233       | 422.7153         | 7  |
| 19 | 2050.9465        | 1025.9769        | 2033.9199        | 1017.4636        | 2032.9359        | 1016.9716        | V    | <b>748.3910</b>  | 374.6991         | 731.3644       | 366.1858         | 730.3804       | 365.6938         | 6  |
| 20 | 2179.9891        | 1090.4982        | 2162.9625        | <b>1081.9849</b> | 2161.9785        | <b>1081.4929</b> | E    | 649.3225         | 325.1649         | 632.2960       | 316.6516         | 631.3120       | 316.1596         | 5  |
| 21 | 2309.0317        | 1155.0195        | 2292.0051        | 1146.5062        | 2291.0211        | 1146.0142        | E    | <b>520.2799</b>  | 260.6436         | 503.2534       | 252.1303         | 502.2694       | 251.6383         | 4  |
| 22 | 2422.1157        | 1211.5615        | 2405.0892        | 1203.0482        | 2404.1052        | 1202.5562        | L    | 391.2374         | 196.1223         | 374.2108       | 187.6090         |                |                  | 3  |
| 23 | 2553.1562        | <b>1277.0817</b> | 2536.1297        | <b>1268.5685</b> | 2535.1456        | <b>1268.0765</b> | M    | <b>278.1533</b>  | 139.5803         | 261.1267       | 131.0670         |                |                  | 2  |



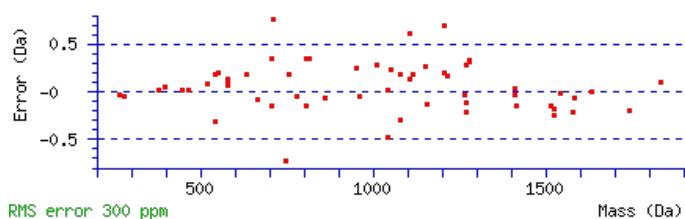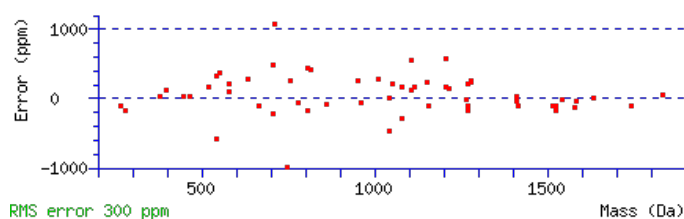

NCBI BLAST search of [EHEAQSNASLDVFLGHTNVEELMK](#)  
 (Parameters: blastp, nr protein database, expect=20000, no filter, PAM30)  
 Other BLAST [web gateways](#)

All matches to this query

| Score | Mr(calc)  | Delta   | Sequence                                  | Site Analysis        |
|-------|-----------|---------|-------------------------------------------|----------------------|
| 75.8  | 2698.2544 | 0.0137  | <a href="#">EHEAQSNASLDVFLGHTNVEELMK</a>  | Deamidated N7 62.04% |
| 73.6  | 2698.2544 | 0.0137  | <a href="#">EHEAQSNASLDVFLGHTNVEELMK</a>  | Deamidated Q5 37.90% |
| 67.4  | 2697.2704 | 0.9978  | <a href="#">EHEAQSNASLDVFLGHTNVEELMK</a>  |                      |
| 45.0  | 2698.2544 | 0.0137  | <a href="#">EHEAQSNASLDVFLGHTNVEELMK</a>  | Deamidated N18 0.05% |
| 5.1   | 2696.2541 | 2.0141  | <a href="#">WQYDVWSTDVTVANKMEAGGIPGR</a>  |                      |
| 4.2   | 2696.2501 | 2.0181  | <a href="#">GFSSDGEQDSTAVPMVSVPAQYPRR</a> |                      |
| 3.4   | 2698.2811 | -0.0129 | <a href="#">FGEKMAFIPQNLFLFQHQEPMK</a>    |                      |
| 3.4   | 2698.2811 | -0.0129 | <a href="#">FGEKMAFIPQNLFLFQHQEPMK</a>    |                      |
| 2.0   | 2698.2632 | 0.0050  | <a href="#">QHQTLYTSHSFTKSCVNCIYPK</a>    |                      |
| 1.9   | 2698.2771 | -0.0089 | <a href="#">QGNFMVTAWNDNGKKLVFVINGPM</a>  |                      |

Mascot: <http://www.matrixscience.com/>

# MASCOT SCIENCE Mascot Search Results

## Peptide View

MS/MS Fragmentation of **EHEAQSNASLDVFLGHTNVEELMK**

Found in **H0YFH3** in **con\_Xuniprot\_HUMAN3**, H0YFH3\_HUMAN Complement C1r subcomponent OS=Homo sapiens GN=C1R PE=2 SV=1

Match to Query 25352: 2699.237622 from(900.753150,3+) intensity(18860.4766) rtinseconds(2197) scans(5653) index(14699)

Title: 111019\_Est\_ML\_YP\_G\_03Spectrum4920\_scans\_\_5653

Data file C:\mascot\20140703\_Tmgf\_1D\CSV\_UseAnalysis\MasterCSV\All\_Glyco\mgf\ptm\UC18ERLIC\_PTM\_35D.mgf

Click mouse within plot area to zoom in by factor of two about that point

Or, to Da

Label all possible matches Label matches used for scoring

Show Y-axis

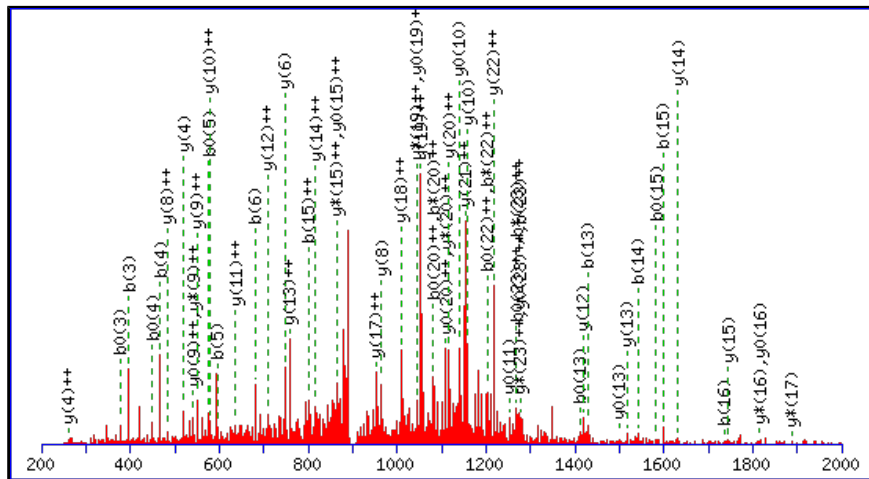

Monoisotopic mass of neutral peptide Mr(calc): 2699.2384

Fixed modifications: Carbamidomethyl (C) (apply to specified residues or termini only)

Variable modifications:

N7 : Deamidated (NQ)

N18 : Deamidated (NQ)

Ions Score: 45 Expect: 0.0057

Matches : 59/262 fragment ions using 142 most intense peaks ([help](#))

| #  | b         | b <sup>++</sup> | b <sup>*</sup> | b <sup>*++</sup> | b <sup>0</sup> | b <sup>0++</sup> | Seq. | y         | y <sup>++</sup> | y <sup>*</sup> | y <sup>*++</sup> | y <sup>0</sup> | y <sup>0++</sup> | #  |
|----|-----------|-----------------|----------------|------------------|----------------|------------------|------|-----------|-----------------|----------------|------------------|----------------|------------------|----|
| 1  | 130.0499  | 65.5286         |                |                  | 112.0393       | 56.5233          | E    |           |                 |                |                  |                |                  | 24 |
| 2  | 267.1088  | 134.0580        |                |                  | 249.0982       | 125.0527         | H    | 2571.2032 | 1286.1052       | 2554.1766      | 1277.5919        | 2553.1926      | 1277.0999        | 23 |
| 3  | 396.1514  | 198.5793        |                |                  | 378.1408       | 189.5740         | E    | 2434.1442 | 1217.5758       | 2417.1177      | 1209.0625        | 2416.1337      | 1208.5705        | 22 |
| 4  | 467.1885  | 234.0979        |                |                  | 449.1779       | 225.0926         | A    | 2305.1017 | 1153.0545       | 2288.0751      | 1144.5412        | 2287.0911      | 1144.0492        | 21 |
| 5  | 595.2471  | 298.1272        | 578.2205       | 289.6139         | 577.2365       | 289.1219         | Q    | 2234.0645 | 1117.5359       | 2217.0380      | 1109.0226        | 2216.0540      | 1108.5306        | 20 |
| 6  | 682.2791  | 341.6432        | 665.2525       | 333.1299         | 664.2685       | 332.6379         | S    | 2106.0060 | 1053.5066       | 2088.9794      | 1044.9933        | 2087.9954      | 1044.5013        | 19 |
| 7  | 797.3060  | 399.1567        | 780.2795       | 390.6434         | 779.2955       | 390.1514         | N    | 2018.9739 | 1009.9906       | 2001.9474      | 1001.4773        | 2000.9634      | 1000.9853        | 18 |
| 8  | 868.3432  | 434.6752        | 851.3166       | 426.1619         | 850.3326       | 425.6699         | A    | 1903.9470 | 952.4771        | 1886.9204      | 943.9639         | 1885.9364      | 943.4719         | 17 |
| 9  | 955.3752  | 478.1912        | 938.3486       | 469.6780         | 937.3646       | 469.1859         | S    | 1832.9099 | 916.9586        | 1815.8833      | 908.4453         | 1814.8993      | 907.9533         | 16 |
| 10 | 1068.4592 | 534.7333        | 1051.4327      | 526.2200         | 1050.4487      | 525.7280         | L    | 1745.8779 | 873.4426        | 1728.8513      | 864.9293         | 1727.8673      | 864.4373         | 15 |
| 11 | 1183.4862 | 592.2467        | 1166.4596      | 583.7335         | 1165.4756      | 583.2414         | D    | 1632.7938 | 816.9005        | 1615.7672      | 808.3873         | 1614.7832      | 807.8952         | 14 |
| 12 | 1282.5546 | 641.7809        | 1265.5281      | 633.2677         | 1264.5440      | 632.7757         | V    | 1517.7668 | 759.3871        | 1500.7403      | 750.8738         | 1499.7563      | 750.3818         | 13 |
| 13 | 1429.6230 | 715.3151        | 1412.5965      | 706.8019         | 1411.6124      | 706.3099         | F    | 1418.6984 | 709.8529        | 1401.6719      | 701.3396         | 1400.6879      | 700.8476         | 12 |
| 14 | 1542.7071 | 771.8572        | 1525.6805      | 763.3439         | 1524.6965      | 762.8519         | L    | 1271.6300 | 636.3186        | 1254.6035      | 627.8054         | 1253.6195      | 627.3134         | 11 |
| 15 | 1599.7285 | 800.3679        | 1582.7020      | 791.8546         | 1581.7180      | 791.3626         | G    | 1158.5460 | 579.7766        | 1141.5194      | 571.2633         | 1140.5354      | 570.7713         | 10 |
| 16 | 1736.7875 | 868.8974        | 1719.7609      | 860.3841         | 1718.7769      | 859.8921         | H    | 1101.5245 | 551.2659        | 1084.4979      | 542.7526         | 1083.5139      | 542.2606         | 9  |
| 17 | 1837.8351 | 919.4212        | 1820.8086      | 910.9079         | 1819.8246      | 910.4159         | T    | 964.4656  | 482.7364        | 947.4390       | 474.2232         | 946.4550       | 473.7311         | 8  |
| 18 | 1952.8621 | 976.9347        | 1935.8355      | 968.4214         | 1934.8515      | 967.9294         | N    | 863.4179  | 432.2126        | 846.3913       | 423.6993         | 845.4073       | 423.2073         | 7  |
| 19 | 2051.9305 | 1026.4689       | 2034.9039      | 1017.9556        | 2033.9199      | 1017.4636        | V    | 748.3910  | 374.6991        | 731.3644       | 366.1858         | 730.3804       | 365.6938         | 6  |
| 20 | 2180.9731 | 1090.9902       | 2163.9465      | 1082.4769        | 2162.9625      | 1081.9849        | E    | 649.3225  | 325.1649        | 632.2960       | 316.6516         | 631.3120       | 316.1596         | 5  |
| 21 | 2310.0157 | 1155.5115       | 2292.9891      | 1146.9982        | 2292.0051      | 1146.5062        | E    | 520.2799  | 260.6436        | 503.2534       | 252.1303         | 502.2694       | 251.6383         | 4  |
| 22 | 2423.0997 | 1212.0535       | 2406.0732      | 1203.5402        | 2405.0892      | 1203.0482        | L    | 391.2374  | 196.1223        | 374.2108       | 187.6090         |                |                  | 3  |

|    |           |           |           |           |           |           |   |          |          |          |          |  |  |   |
|----|-----------|-----------|-----------|-----------|-----------|-----------|---|----------|----------|----------|----------|--|--|---|
| 23 | 2554.1402 | 1277.5738 | 2537.1137 | 1269.0605 | 2536.1297 | 1268.5685 | M | 278.1533 | 139.5803 | 261.1267 | 131.0670 |  |  | 2 |
| 24 |           |           |           |           |           |           | K | 147.1128 | 74.0600  | 130.0863 | 65.5468  |  |  | 1 |

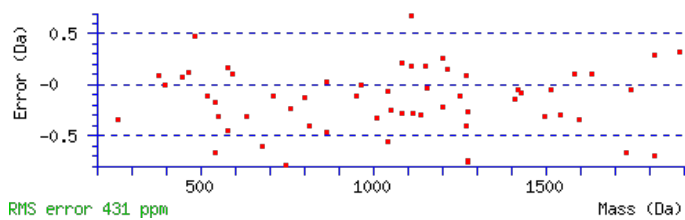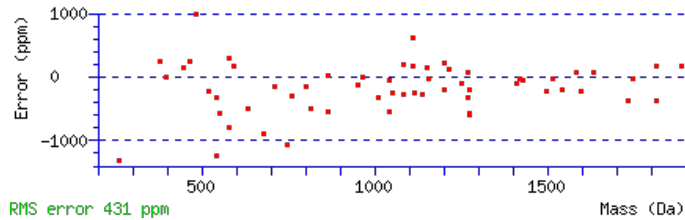

NCBI BLAST search of [EHEAQSNASLDVFLGHTNVEELMK](#)  
 (Parameters: blastp, nr protein database, expect=20000, no filter, PAM30)  
 Other BLAST [web gateways](#)

All matches to this query

| Score | Mr(calc)  | Delta   | Sequence                                 | Site Analysis             |
|-------|-----------|---------|------------------------------------------|---------------------------|
| 45.2  | 2699.2384 | -0.0008 | <a href="#">EHEAQSNASLDVFLGHTNVEELMK</a> | Deamidated N7, N18 66.41% |
| 42.0  | 2699.2384 | -0.0008 | <a href="#">EHEAQSNASLDVFLGHTNVEELMK</a> | Deamidated Q5, N18 31.93% |
| 29.1  | 2699.2384 | -0.0008 | <a href="#">EHEAQSNASLDVFLGHTNVEELMK</a> | Deamidated Q5, N7 1.66%   |
| 8.5   | 2699.2360 | 0.0017  | <a href="#">RFQQFLDEMEKTNAESLSNMTQ</a>   |                           |
| 8.5   | 2699.2360 | 0.0017  | <a href="#">RFQQFLDEMEKTNAESLSNMTQ</a>   |                           |
| 1.9   | 2698.2466 | 0.9910  | <a href="#">NHMSSTDLLSVVKMEIEDEGFSK</a>  |                           |
| 1.9   | 2699.2306 | 0.0070  | <a href="#">NHMSSTDLLSVVKMEIEDEGFSK</a>  |                           |
| 1.9   | 2699.2254 | 0.0122  | <a href="#">NWNLYPACLREMSRVCTPTTGR</a>   |                           |

Mascot: <http://www.matrixscience.com/>

# MASCOT SCIENCE Mascot Search Results

## Peptide View

MS/MS Fragmentation of **KENSSEICSNNGECVCGQCVC**R

Found in **H7C4N8** in **con\_Xuniprot\_HUMAN3**, H7C4N8\_HUMAN Integrin beta-1 (Fragment) OS=Homo sapiens GN=ITGB1 PE=4 SV=1

Match to Query 22381: 2647.029252 from(883.350360,3+) intensity(4828.0942) rtinseconds(389) scans(812) index(6125)

Title: 111019\_Est\_ISCardio\_NMI\_YP\_G\_9Spectrum695\_scans\_\_812

Data file C:\mascot\20140703\_Tmgf\_1D\CSV\_UseAnalysis\MasterCSV\All\_Glyco\mgf\ptm\UC18ERLIC\_PTM\_35D.mgf

Click mouse within plot area to zoom in by factor of two about that point

Or, to Da

Label all possible matches Label matches used for scoring

Show Y-axis

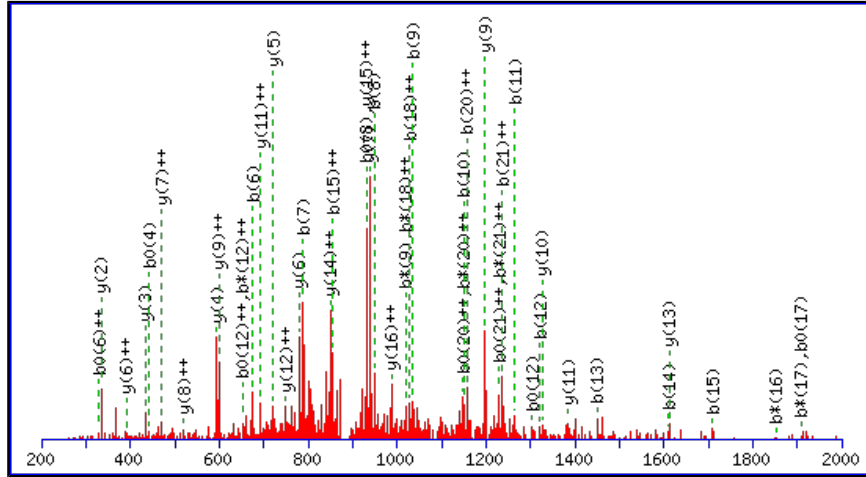

Monoisotopic mass of neutral peptide Mr(calc): 2647.0189

Fixed modifications: Carbamidomethyl (C) (apply to specified residues or termini only)

Variable modifications:

N3 : Deamidated (NQ)

Ions Score: 55 Expect: 3.1e-005

Matches : 48/232 fragment ions using 83 most intense peaks ([help](#))

| #  | b                | b <sup>++</sup>  | b <sup>*</sup>   | b <sup>*++</sup> | b <sup>0</sup>   | b <sup>0++</sup> | Seq.     | y                | y <sup>++</sup> | y <sup>*</sup> | y <sup>*++</sup> | y <sup>0</sup> | y <sup>0++</sup> | #         |
|----|------------------|------------------|------------------|------------------|------------------|------------------|----------|------------------|-----------------|----------------|------------------|----------------|------------------|-----------|
| 1  | 129.1022         | 65.0548          | 112.0757         | 56.5415          |                  |                  | <b>K</b> |                  |                 |                |                  |                |                  | <b>22</b> |
| 2  | 258.1448         | 129.5761         | 241.1183         | 121.0628         | 240.1343         | 120.5708         | <b>E</b> | 2519.9313        | 1260.4693       | 2502.9047      | 1251.9560        | 2501.9207      | 1251.4640        | <b>21</b> |
| 3  | 373.1718         | 187.0895         | 356.1452         | 178.5763         | 355.1612         | 178.0842         | <b>N</b> | 2390.8887        | 1195.9480       | 2373.8621      | 1187.4347        | 2372.8781      | 1186.9427        | <b>20</b> |
| 4  | 460.2038         | 230.6055         | 443.1773         | 222.0923         | <b>442.1932</b>  | 221.6003         | <b>S</b> | 2275.8617        | 1138.4345       | 2258.8352      | 1129.9212        | 2257.8512      | 1129.4292        | <b>19</b> |
| 5  | 547.2358         | 274.1216         | 530.2093         | 265.6083         | 529.2253         | 265.1163         | <b>S</b> | 2188.8297        | 1094.9185       | 2171.8031      | 1086.4052        | 2170.8191      | 1085.9132        | <b>18</b> |
| 6  | <b>676.2784</b>  | 338.6429         | 659.2519         | 330.1296         | 658.2679         | <b>329.6376</b>  | <b>E</b> | 2101.7977        | 1051.4025       | 2084.7711      | 1042.8892        | 2083.7871      | 1042.3972        | <b>17</b> |
| 7  | <b>789.3625</b>  | 395.1849         | 772.3359         | 386.6716         | 771.3519         | 386.1796         | <b>I</b> | 1972.7551        | <b>986.8812</b> | 1955.7285      | 978.3679         | 1954.7445      | 977.8759         | <b>16</b> |
| 8  | <b>949.3931</b>  | 475.2002         | 932.3666         | 466.6869         | <b>931.3826</b>  | 466.1949         | <b>C</b> | 1859.6710        | <b>930.3391</b> | 1842.6445      | 921.8259         | 1841.6604      | 921.3339         | <b>15</b> |
| 9  | <b>1036.4252</b> | 518.7162         | <b>1019.3986</b> | 510.2029         | 1018.4146        | 509.7109         | <b>S</b> | 1699.6404        | <b>850.3238</b> | 1682.6138      | 841.8105         | 1681.6298      | 841.3185         | <b>14</b> |
| 10 | <b>1150.4681</b> | 575.7377         | 1133.4415        | 567.2244         | 1132.4575        | 566.7324         | <b>N</b> | <b>1612.6083</b> | 806.8078        | 1595.5818      | 798.2945         | 1594.5978      | 797.8025         | <b>13</b> |
| 11 | <b>1264.5110</b> | 632.7591         | 1247.4845        | 624.2459         | 1246.5005        | 623.7539         | <b>N</b> | 1498.5654        | <b>749.7863</b> | 1481.5389      | 741.2731         | 1480.5548      | 740.7811         | <b>12</b> |
| 12 | <b>1321.5325</b> | 661.2699         | 1304.5059        | <b>652.7566</b>  | <b>1303.5219</b> | <b>652.2646</b>  | <b>G</b> | <b>1384.5225</b> | <b>692.7649</b> | 1367.4959      | 684.2516         | 1366.5119      | 683.7596         | <b>11</b> |
| 13 | <b>1450.5751</b> | 725.7912         | 1433.5485        | 717.2779         | 1432.5645        | 716.7859         | <b>E</b> | <b>1327.5010</b> | 664.2541        | 1310.4745      | 655.7409         | 1309.4904      | 655.2489         | <b>10</b> |
| 14 | <b>1610.6057</b> | 805.8065         | 1593.5792        | 797.2932         | 1592.5952        | 796.8012         | <b>C</b> | <b>1198.4584</b> | <b>599.7328</b> | 1181.4319      | 591.2196         |                |                  | <b>9</b>  |
| 15 | <b>1709.6741</b> | <b>855.3407</b>  | 1692.6476        | 846.8274         | 1691.6636        | 846.3354         | <b>V</b> | 1038.4278        | <b>519.7175</b> | 1021.4012      | 511.2042         |                |                  | <b>8</b>  |
| 16 | 1869.7048        | 935.3560         | <b>1852.6782</b> | 926.8428         | 1851.6942        | 926.3507         | <b>C</b> | <b>939.3594</b>  | <b>470.1833</b> | 922.3328       | 461.6700         |                |                  | <b>7</b>  |
| 17 | 1926.7263        | 963.8668         | <b>1909.6997</b> | 955.3535         | <b>1908.7157</b> | 954.8615         | <b>G</b> | <b>779.3287</b>  | <b>390.1680</b> | 762.3022       | 381.6547         |                |                  | <b>6</b>  |
| 18 | 2054.7848        | <b>1027.8961</b> | 2037.7583        | <b>1019.3828</b> | 2036.7743        | 1018.8908        | <b>Q</b> | <b>722.3072</b>  | 361.6573        | 705.2807       | 353.1440         |                |                  | <b>5</b>  |
| 19 | 2214.8155        | 1107.9114        | 2197.7889        | 1099.3981        | 2196.8049        | 1098.9061        | <b>C</b> | <b>594.2487</b>  | 297.6280        | 577.2221       | 289.1147         |                |                  | <b>4</b>  |
| 20 | 2313.8839        | <b>1157.4456</b> | 2296.8573        | <b>1148.9323</b> | 2295.8733        | <b>1148.4403</b> | <b>V</b> | <b>434.2180</b>  | 217.6126        | 417.1915       | 209.0994         |                |                  | <b>3</b>  |
| 21 | 2473.9145        | <b>1237.4609</b> | 2456.8880        | <b>1228.9476</b> | 2455.9040        | <b>1228.4556</b> | <b>C</b> | <b>335.1496</b>  | 168.0784        | 318.1231       | 159.5652         |                |                  | <b>2</b>  |
| 22 |                  |                  |                  |                  |                  |                  | <b>R</b> | 175.1190         | 88.0631         | 158.0924       | 79.5498          |                |                  | <b>1</b>  |

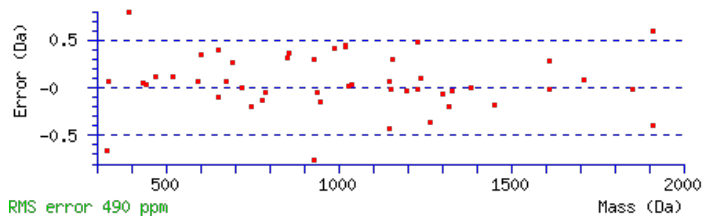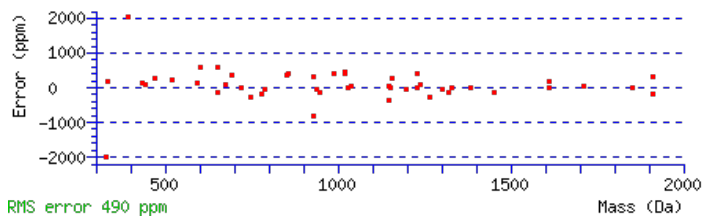

NCBI BLAST search of [KENSSEICSNNGECVCGQCVCR](#)

(Parameters: blastp, nr protein database, expect=20000, no filter, PAM30)

Other BLAST [web gateways](#)

All matches to this query

| Score | Mr(calc)  | Delta  | Sequence                               | Site Analysis         |
|-------|-----------|--------|----------------------------------------|-----------------------|
| 55.1  | 2647.0189 | 0.0103 | <a href="#">KENSSEICSNNGECVCGQCVCR</a> | Deamidated N3 70.48%  |
| 48.8  | 2647.0189 | 0.0103 | <a href="#">KENSSEICSNNGECVCGQCVCR</a> | Deamidated N10 16.41% |
| 47.8  | 2647.0189 | 0.0103 | <a href="#">KENSSEICSNNGECVCGQCVCR</a> | Deamidated N11 13.09% |
| 31.2  | 2646.0349 | 0.9943 | <a href="#">KENSSEICSNNGECVCGQCVCR</a> |                       |
| 20.1  | 2647.0189 | 0.0103 | <a href="#">KENSSEICSNNGECVCGQCVCR</a> | Deamidated Q18 0.02%  |

Mascot: <http://www.matrixscience.com/>

# MASCOT SCIENCE Mascot Search Results

## Peptide View

MS/MS Fragmentation of **VTQNLTLIEESLTSEFIHDIDR**

Found in **I3L4N7** in **con\_Xuniprot\_HUMAN3**, I3L4N7\_HUMAN Pigment epithelium-derived factor (Fragment) OS=Homo sapiens  
GN=SERPINF1 PE=2 SV=1

Match to Query 21936: 2573.296692 from(858.772840,3+) intensity(59197.3633) rtinseconds(2756) scans(7375) index(16377)

Title: 111019\_Est\_MI\_YP\_G\_05Spectrum6349\_scans\_7375

Data file C:\mascot\20140703\_Tmgf\_1D\CSV\_UseAnalysis\MasterCSV\All\_Glyco\mgf\ptm\UC18ERLIC\_PTM\_35D.mgf

Click mouse within plot area to zoom in by factor of two about that point

Or, to Da

Label all possible matches Label matches used for scoring

Show Y-axis

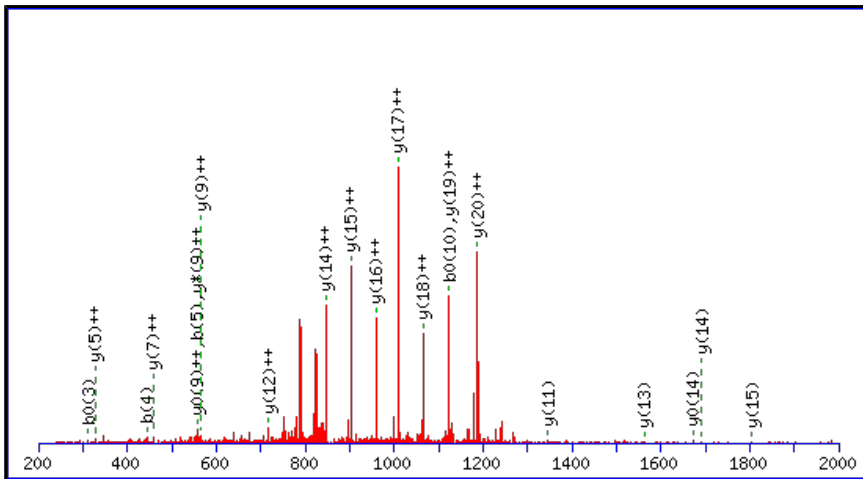

Monoisotopic mass of neutral peptide Mr(calc): 2573.2861

Fixed modifications: Carbamidomethyl (C) (apply to specified residues or termini only)

Variable modifications:

N4 : Deamidated (NQ)

Ions Score: 58 Expect: 0.00038

Matches : 22/244 fragment ions using 36 most intense peaks ([help](#))

| #  | b         | b <sup>++</sup> | b <sup>*</sup> | b <sup>*++</sup> | b <sup>0</sup> | b <sup>0++</sup> | Seq. | y         | y <sup>++</sup> | y <sup>*</sup> | y <sup>*++</sup> | y <sup>0</sup> | y <sup>0++</sup> | #  |
|----|-----------|-----------------|----------------|------------------|----------------|------------------|------|-----------|-----------------|----------------|------------------|----------------|------------------|----|
| 1  | 100.0757  | 50.5415         |                |                  |                |                  | V    |           |                 |                |                  |                |                  | 22 |
| 2  | 201.1234  | 101.0653        |                |                  | 183.1128       | 92.0600          | T    | 2475.2249 | 1238.1161       | 2458.1984      | 1229.6028        | 2457.2144      | 1229.1108        | 21 |
| 3  | 329.1819  | 165.0946        | 312.1554       | 156.5813         | 311.1714       | 156.0893         | Q    | 2374.1773 | 1187.5923       | 2357.1507      | 1179.0790        | 2356.1667      | 1178.5870        | 20 |
| 4  | 444.2089  | 222.6081        | 427.1823       | 214.0948         | 426.1983       | 213.6028         | N    | 2246.1187 | 1123.5630       | 2229.0921      | 1115.0497        | 2228.1081      | 1114.5577        | 19 |
| 5  | 557.2930  | 279.1501        | 540.2664       | 270.6368         | 539.2824       | 270.1448         | L    | 2131.0917 | 1066.0495       | 2114.0652      | 1057.5362        | 2113.0812      | 1057.0442        | 18 |
| 6  | 658.3406  | 329.6740        | 641.3141       | 321.1607         | 640.3301       | 320.6687         | T    | 2018.0077 | 1009.5075       | 2000.9811      | 1000.9942        | 1999.9971      | 1000.5022        | 17 |
| 7  | 771.4247  | 386.2160        | 754.3981       | 377.7027         | 753.4141       | 377.2107         | L    | 1916.9600 | 958.9836        | 1899.9334      | 950.4704         | 1898.9494      | 949.9784         | 16 |
| 8  | 884.5088  | 442.7580        | 867.4822       | 434.2447         | 866.4982       | 433.7527         | I    | 1803.8759 | 902.4416        | 1786.8494      | 893.9283         | 1785.8654      | 893.4363         | 15 |
| 9  | 1013.5514 | 507.2793        | 996.5248       | 498.7660         | 995.5408       | 498.2740         | E    | 1690.7919 | 845.8996        | 1673.7653      | 837.3863         | 1672.7813      | 836.8943         | 14 |
| 10 | 1142.5939 | 571.8006        | 1125.5674      | 563.2873         | 1124.5834      | 562.7953         | E    | 1561.7493 | 781.3783        | 1544.7227      | 772.8650         | 1543.7387      | 772.3730         | 13 |
| 11 | 1229.6260 | 615.3166        | 1212.5994      | 606.8034         | 1211.6154      | 606.3113         | S    | 1432.7067 | 716.8570        | 1415.6801      | 708.3437         | 1414.6961      | 707.8517         | 12 |
| 12 | 1342.7100 | 671.8587        | 1325.6835      | 663.3454         | 1324.6995      | 662.8534         | L    | 1345.6747 | 673.3410        | 1328.6481      | 664.8277         | 1327.6641      | 664.3357         | 11 |
| 13 | 1443.7577 | 722.3825        | 1426.7312      | 713.8692         | 1425.7472      | 713.3772         | T    | 1232.5906 | 616.7989        | 1215.5640      | 608.2857         | 1214.5800      | 607.7937         | 10 |
| 14 | 1530.7897 | 765.8985        | 1513.7632      | 757.3852         | 1512.7792      | 756.8932         | S    | 1131.5429 | 566.2751        | 1114.5164      | 557.7618         | 1113.5323      | 557.2698         | 9  |
| 15 | 1659.8323 | 830.4198        | 1642.8058      | 821.9065         | 1641.8218      | 821.4145         | E    | 1044.5109 | 522.7591        | 1027.4843      | 514.2458         | 1026.5003      | 513.7538         | 8  |
| 16 | 1806.9008 | 903.9540        | 1789.8742      | 895.4407         | 1788.8902      | 894.9487         | F    | 915.4683  | 458.2378        | 898.4417       | 449.7245         | 897.4577       | 449.2325         | 7  |
| 17 | 1919.9848 | 960.4960        | 1902.9583      | 951.9828         | 1901.9743      | 951.4908         | I    | 768.3999  | 384.7036        | 751.3733       | 376.1903         | 750.3893       | 375.6983         | 6  |
| 18 | 2057.0437 | 1029.0255       | 2040.0172      | 1020.5122        | 2039.0332      | 1020.0202        | H    | 655.3158  | 328.1615        | 638.2893       | 319.6483         | 637.3052       | 319.1563         | 5  |
| 19 | 2172.0707 | 1086.5390       | 2155.0441      | 1078.0257        | 2154.0601      | 1077.5337        | D    | 518.2569  | 259.6321        | 501.2304       | 251.1188         | 500.2463       | 250.6268         | 4  |
| 20 | 2285.1547 | 1143.0810       | 2268.1282      | 1134.5677        | 2267.1442      | 1134.0757        | I    | 403.2300  | 202.1186        | 386.2034       | 193.6053         | 385.2194       | 193.1133         | 3  |
| 21 | 2400.1817 | 1200.5945       | 2383.1551      | 1192.0812        | 2382.1711      | 1191.5892        | D    | 290.1459  | 145.5766        | 273.1193       | 137.0633         | 272.1353       | 136.5713         | 2  |
| 22 |           |                 |                |                  |                |                  | R    | 175.1190  | 88.0631         | 158.0924       | 79.5498          |                |                  | 1  |

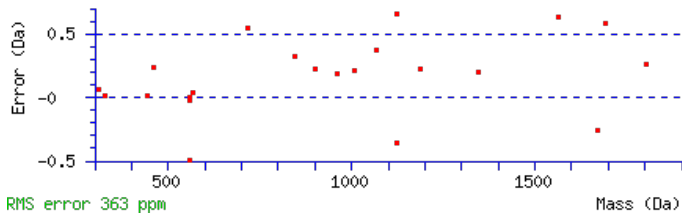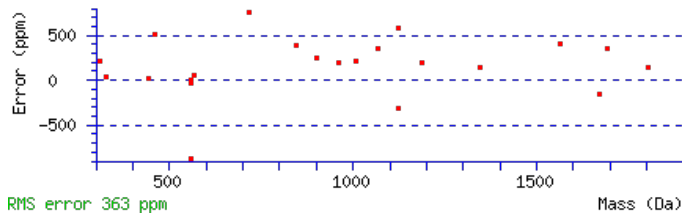

NCBI BLAST search of [VTQNLTIEESLTSEFIHDIDR](#)

(Parameters: blastp, nr protein database, expect=20000, no filter, PAM30)

Other BLAST [web gateways](#)

All matches to this query

| Score | Mr(calc)  | Delta   | Sequence                                  | Site Analysis        |
|-------|-----------|---------|-------------------------------------------|----------------------|
| 58.4  | 2573.2861 | 0.0106  | <a href="#">VTQNLTIEESLTSEFIHDIDR</a>     | Deamidated N4 86.51% |
| 50.3  | 2573.2861 | 0.0106  | <a href="#">VTQNLTIEESLTSEFIHDIDR</a>     | Deamidated Q3 13.49% |
| 47.5  | 2572.3020 | 0.9946  | <a href="#">VTQNLTIEESLTSEFIHDIDR</a>     |                      |
| 5.8   | 2573.3006 | -0.0039 | <a href="#">AQKENS LQLQKAQLEQLLADMR</a>   |                      |
| 5.8   | 2573.3006 | -0.0039 | <a href="#">AQKENS LQLQKAQLEQLLADMR</a>   |                      |
| 5.4   | 2573.3006 | -0.0039 | <a href="#">AQKENS LQLQKAQLEQLLADMR</a>   |                      |
| 5.0   | 2573.3006 | -0.0039 | <a href="#">AQKENS LQLQKAQLEQLLADMR</a>   |                      |
| 2.5   | 2571.2978 | 1.9989  | <a href="#">SIRIFVHFINSYMEKPTVAMR</a>     |                      |
| 2.2   | 2571.2890 | 2.0077  | <a href="#">VKTMEVTSVSIELEKNFSNFR</a>     |                      |
| 2.0   | 2571.2830 | 2.0137  | <a href="#">HLSPOG PQLSHLQAQAALPGPHQR</a> |                      |

Mascot: <http://www.matrixscience.com/>



# MASCOT SCIENCE Mascot Search Results

## Peptide View

MS/MS Fragmentation of **ILRQQHLFGSNVTDCSGNFCLFR**

Found in **J3KN47** in **con\_Xuniprot\_HUMAN3**, J3KN47\_HUMAN Serotransferrin OS=Homo sapiens GN=TF PE=2 SV=1

Match to Query 26121: 2897.382912 from(966.801580,3+) intensity(83093.0703) rtinseconds(1646) scans(4144) index(26690)

Title: 111019\_Est\_MI\_YS\_G\_09Spectrum3592\_scans\_\_4144

Data file C:\mascot\20140703\_Tmgf\_1D\CSV\_UseAnalysis\MasterCSV\All\_Glyco\mgf\ptm\UC18ERLIC\_PTM\_35D.mgf

Click mouse within plot area to zoom in by factor of two about that point

Or, to Da

Label all possible matches Label matches used for scoring

Show Y-axis

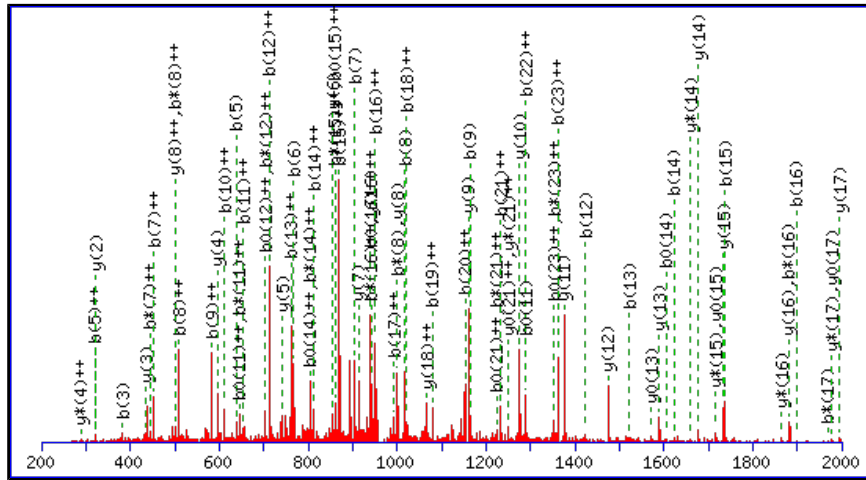

Monoisotopic mass of neutral peptide Mr(calc): 2897.3701

Fixed modifications: Carbamidomethyl (C) (apply to specified residues or termini only)

Variable modifications:

N12 : Deamidated (NQ)

Ions Score: 90 Expect: 2.4e-007

Matches : 79/238 fragment ions using 141 most intense peaks ([help](#))

| #  | b                | b <sup>++</sup>  | b <sup>*</sup>   | b <sup>*++</sup> | b <sup>0</sup>   | b <sup>0++</sup> | Seq. | y                | y <sup>++</sup>  | y <sup>*</sup>   | y <sup>*++</sup> | y <sup>0</sup>   | y <sup>0++</sup> | #  |
|----|------------------|------------------|------------------|------------------|------------------|------------------|------|------------------|------------------|------------------|------------------|------------------|------------------|----|
| 1  | 114.0913         | 57.5493          |                  |                  |                  |                  | I    |                  |                  |                  |                  |                  |                  | 24 |
| 2  | 227.1754         | 114.0913         |                  |                  |                  |                  | L    | 2785.2933        | 1393.1503        | 2768.2668        | 1384.6370        | 2767.2828        | 1384.1450        | 23 |
| 3  | <b>383.2765</b>  | 192.1419         | 366.2500         | 183.6286         |                  |                  | R    | 2672.2093        | 1336.6083        | 2655.1827        | 1328.0950        | 2654.1987        | 1327.6030        | 22 |
| 4  | 511.3351         | 256.1712         | 494.3085         | 247.6579         |                  |                  | Q    | 2516.1082        | 1258.5577        | 2499.0816        | <b>1250.0444</b> | 2498.0976        | <b>1249.5524</b> | 21 |
| 5  | <b>639.3937</b>  | <b>320.2005</b>  | 622.3671         | 311.6872         |                  |                  | Q    | 2388.0496        | 1194.5284        | 2371.0230        | 1186.0152        | 2370.0390        | 1185.5231        | 20 |
| 6  | <b>767.4522</b>  | 384.2298         | 750.4257         | 375.7165         |                  |                  | Q    | 2259.9910        | 1130.4991        | 2242.9645        | 1121.9859        | 2241.9804        | 1121.4939        | 19 |
| 7  | <b>904.5112</b>  | <b>452.7592</b>  | 887.4846         | <b>444.2459</b>  |                  |                  | H    | 2131.9324        | <b>1066.4698</b> | 2114.9059        | 1057.9566        | 2113.9219        | 1057.4646        | 18 |
| 8  | <b>1017.5952</b> | <b>509.3013</b>  | <b>1000.5687</b> | <b>500.7880</b>  |                  |                  | L    | <b>1994.8735</b> | 997.9404         | <b>1977.8470</b> | 989.4271         | <b>1976.8629</b> | 988.9351         | 17 |
| 9  | <b>1164.6636</b> | <b>582.8355</b>  | 1147.6371        | 574.3222         |                  |                  | F    | <b>1881.7894</b> | 941.3984         | <b>1864.7629</b> | 932.8851         | 1863.7789        | 932.3931         | 16 |
| 10 | 1221.6851        | <b>611.3462</b>  | 1204.6586        | 602.8329         |                  |                  | G    | <b>1734.7210</b> | 867.8642         | <b>1717.6945</b> | 859.3509         | <b>1716.7105</b> | 858.8589         | 15 |
| 11 | 1308.7171        | <b>654.8622</b>  | 1291.6906        | <b>646.3489</b>  | <b>1290.7066</b> | <b>645.8569</b>  | S    | <b>1677.6996</b> | 839.3534         | <b>1660.6730</b> | 830.8401         | 1659.6890        | 830.3481         | 14 |
| 12 | <b>1423.7441</b> | <b>712.3757</b>  | 1406.7175        | <b>703.8624</b>  | 1405.7335        | <b>703.3704</b>  | N    | <b>1590.6675</b> | 795.8374         | 1573.6410        | 787.3241         | <b>1572.6570</b> | 786.8321         | 13 |
| 13 | <b>1522.8125</b> | <b>761.9099</b>  | 1505.7859        | 753.3966         | 1504.8019        | 752.9046         | V    | <b>1475.6406</b> | 738.3239         | 1458.6140        | 729.8107         | 1457.6300        | 729.3187         | 12 |
| 14 | <b>1623.8602</b> | <b>812.4337</b>  | 1606.8336        | <b>803.9204</b>  | <b>1605.8496</b> | <b>803.4284</b>  | T    | <b>1376.5722</b> | 688.7897         | 1359.5456        | 680.2765         | 1358.5616        | 679.7844         | 11 |
| 15 | <b>1738.8871</b> | <b>869.9472</b>  | 1721.8606        | <b>861.4339</b>  | 1720.8765        | <b>860.9419</b>  | D    | <b>1275.5245</b> | 638.2659         | 1258.4980        | 629.7526         | 1257.5139        | 629.2606         | 10 |
| 16 | <b>1898.9178</b> | <b>949.9625</b>  | 1881.8912        | <b>941.4492</b>  | 1880.9072        | <b>940.9572</b>  | C    | <b>1160.4976</b> | 580.7524         | 1143.4710        | 572.2391         | 1142.4870        | 571.7471         | 9  |
| 17 | 1985.9498        | <b>993.4785</b>  | <b>1968.9232</b> | 984.9653         | 1967.9392        | 984.4732         | S    | <b>1000.4669</b> | <b>500.7371</b>  | 983.4404         | 492.2238         | 982.4563         | 491.7318         | 8  |
| 18 | 2042.9713        | <b>1021.9893</b> | 2025.9447        | 1013.4760        | 2024.9607        | 1012.9840        | G    | <b>913.4349</b>  | 457.2211         | 896.4083         | 448.7078         |                  |                  | 7  |
| 19 | 2157.0142        | <b>1079.0107</b> | 2139.9876        | 1070.4975        | 2139.0036        | 1070.0054        | N    | <b>856.4134</b>  | 428.7103         | 839.3869         | 420.1971         |                  |                  | 6  |
| 20 | 2304.0826        | <b>1152.5449</b> | 2287.0560        | 1144.0317        | 2286.0720        | 1143.5397        | F    | <b>742.3705</b>  | 371.6889         | 725.3439         | 363.1756         |                  |                  | 5  |
| 21 | 2464.1132        | <b>1232.5603</b> | 2447.0867        | <b>1224.0470</b> | 2446.1027        | <b>1223.5550</b> | C    | <b>595.3021</b>  | 298.1547         | 578.2755         | <b>289.6414</b>  |                  |                  | 4  |
| 22 | 2577.1973        | <b>1289.1023</b> | 2560.1708        | 1280.5890        | 2559.1867        | 1280.0970        | L    | <b>435.2714</b>  | 218.1394         | 418.2449         | 209.6261         |                  |                  | 3  |
| 23 | 2724.2657        | <b>1362.6365</b> | 2707.2392        | <b>1354.1232</b> | 2706.2552        | <b>1353.6312</b> | F    | <b>322.1874</b>  | 161.5973         | 305.1608         | 153.0840         |                  |                  | 2  |

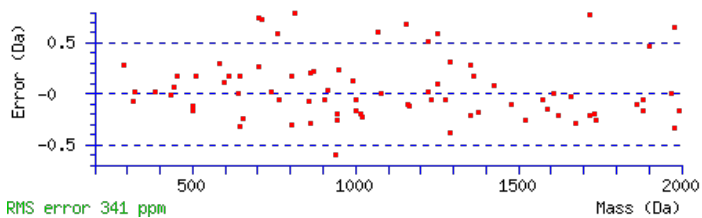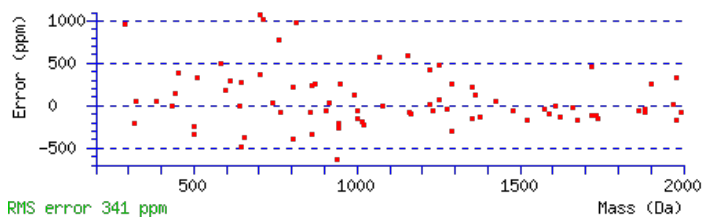

NCBI BLAST search of [ILRQQQHLEFGSNVTDCSGNFCLER](#)

(Parameters: blastp, nr protein database, expect=20000, no filter, PAM30)

Other BLAST [web gateways](#)

All matches to this query

| Score | Mr(calc)  | Delta   | Sequence                                  | Site Analysis         |
|-------|-----------|---------|-------------------------------------------|-----------------------|
| 90.2  | 2897.3701 | 0.0128  | <a href="#">ILRQQQHLEFGSNVTDCSGNFCLER</a> | Deamidated N12 53.17% |
| 84.5  | 2897.3701 | 0.0128  | <a href="#">ILRQQQHLEFGSNVTDCSGNFCLER</a> | Deamidated Q6 14.31%  |
| 84.5  | 2897.3701 | 0.0128  | <a href="#">ILRQQQHLEFGSNVTDCSGNFCLER</a> | Deamidated Q4 14.28%  |
| 83.6  | 2897.3701 | 0.0128  | <a href="#">ILRQQQHLEFGSNVTDCSGNFCLER</a> | Deamidated Q5 11.55%  |
| 81.2  | 2897.3701 | 0.0128  | <a href="#">ILRQQQHLEFGSNVTDCSGNFCLER</a> | Deamidated N19 6.69%  |
| 67.5  | 2896.3861 | 0.9968  | <a href="#">ILRQQQHLEFGSNVTDCSGNFCLER</a> |                       |
| 8.3   | 2897.3851 | -0.0022 | <a href="#">VYELENRLQTETEQLNEIQKLMR</a>   |                       |
| 5.3   | 2897.3800 | 0.0029  | <a href="#">MNDDATQQLVHRTEVVMNNLSPAWK</a> |                       |
| 5.3   | 2897.3800 | 0.0029  | <a href="#">MNDDATQQLVHRTEVVMNNLSPAWK</a> |                       |
| 4.3   | 2897.3930 | -0.0101 | <a href="#">SKSDGTLFALNNIENQIVFNQEERK</a> |                       |

Mascot: <http://www.matrixscience.com/>

# MATRIX SCIENCE Mascot Search Results

## Peptide View

MS/MS Fragmentation of **IMNGEADAMSLDGGFVYIAGKCGLPVLAENYNK**

Found in **J3KN47** in **con\_Xuniprot\_HUMAN3**, J3KN47\_HUMAN Serotransferrin OS=Homo sapiens GN=TF PE=2 SV=1

Match to Query 27831: 3616.740852 from(1206.587560,3+) intensity(24875.5430) rtinseconds(2463) scans(6535) index(16259)

Title: 111019\_Est\_ML\_YP\_G\_05Spectrum5602\_scans\_\_6535

Data file C:\\mascot\\20140703\_Tmgf\_1D\\CSV\_UseAnalysis\\MasterCSV\\All\_Glyco\\mgf\\ptm\\UC18ERLIC\_PTM\_35D.mgf

Click mouse within plot area to zoom in by factor of two about that point

Or, to Da

Label all possible matches Label matches used for scoring

Show Y-axis

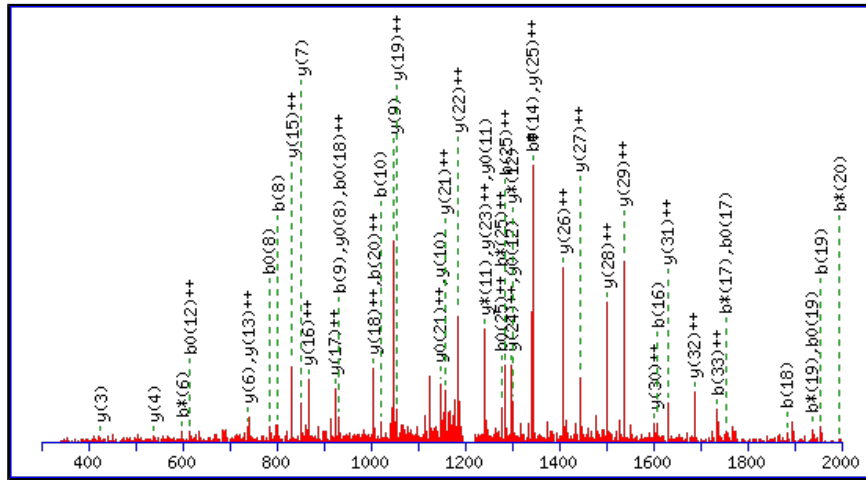

Monoisotopic mass of neutral peptide Mr(calc): 3616.7251

Fixed modifications: Carbamidomethyl (C) (apply to specified residues or termini only)

Variable modifications:

N33 : Deamidated (NQ)

Ions Score: 89 Expect: 2.9e-007

Matches : 52/376 fragment ions using 85 most intense peaks ([help](#))

| #  | b         | b <sup>++</sup> | b <sup>*</sup> | b <sup>*++</sup> | b <sup>0</sup> | b <sup>0++</sup> | Seq. | y         | y <sup>++</sup> | y <sup>*</sup> | y <sup>*++</sup> | y <sup>0</sup> | y <sup>0++</sup> | #  |
|----|-----------|-----------------|----------------|------------------|----------------|------------------|------|-----------|-----------------|----------------|------------------|----------------|------------------|----|
| 1  | 114.0913  | 57.5493         |                |                  |                |                  | I    |           |                 |                |                  |                |                  | 34 |
| 2  | 245.1318  | 123.0696        |                |                  |                |                  | M    | 3504.6484 | 1752.8278       | 3487.6218      | 1744.3146        | 3486.6378      | 1743.8226        | 33 |
| 3  | 359.1748  | 180.0910        | 342.1482       | 171.5777         |                |                  | N    | 3373.6079 | 1687.3076       | 3356.5814      | 1678.7943        | 3355.5973      | 1678.3023        | 32 |
| 4  | 416.1962  | 208.6017        | 399.1697       | 200.0885         |                |                  | G    | 3259.5650 | 1630.2861       | 3242.5384      | 1621.7729        | 3241.5544      | 1621.2808        | 31 |
| 5  | 545.2388  | 273.1230        | 528.2123       | 264.6098         | 527.2282       | 264.1178         | E    | 3202.5435 | 1601.7754       | 3185.5170      | 1593.2621        | 3184.5330      | 1592.7701        | 30 |
| 6  | 616.2759  | 308.6416        | 599.2494       | 300.1283         | 598.2654       | 299.6363         | A    | 3073.5009 | 1537.2541       | 3056.4744      | 1528.7408        | 3055.4904      | 1528.2488        | 29 |
| 7  | 731.3029  | 366.1551        | 714.2763       | 357.6418         | 713.2923       | 357.1498         | D    | 3002.4638 | 1501.7355       | 2985.4373      | 1493.2223        | 2984.4532      | 1492.7303        | 28 |
| 8  | 802.3400  | 401.6736        | 785.3134       | 393.1604         | 784.3294       | 392.6683         | A    | 2887.4369 | 1444.2221       | 2870.4103      | 1435.7088        | 2869.4263      | 1435.2168        | 27 |
| 9  | 933.3805  | 467.1939        | 916.3539       | 458.6806         | 915.3699       | 458.1886         | M    | 2816.3998 | 1408.7035       | 2799.3732      | 1400.1902        | 2798.3892      | 1399.6982        | 26 |
| 10 | 1020.4125 | 510.7099        | 1003.3859      | 502.1966         | 1002.4019      | 501.7046         | S    | 2685.3593 | 1343.1833       | 2668.3327      | 1334.6700        | 2667.3487      | 1334.1780        | 25 |
| 11 | 1133.4966 | 567.2519        | 1116.4700      | 558.7386         | 1115.4860      | 558.2466         | L    | 2598.3272 | 1299.6673       | 2581.3007      | 1291.1540        | 2580.3167      | 1290.6620        | 24 |
| 12 | 1248.5235 | 624.7654        | 1231.4970      | 616.2521         | 1230.5129      | 615.7601         | D    | 2485.2432 | 1243.1252       | 2468.2166      | 1234.6120        | 2467.2326      | 1234.1199        | 23 |
| 13 | 1305.5450 | 653.2761        | 1288.5184      | 644.7628         | 1287.5344      | 644.2708         | G    | 2370.2162 | 1185.6118       | 2353.1897      | 1177.0985        | 2352.2057      | 1176.6065        | 22 |
| 14 | 1362.5664 | 681.7869        | 1345.5399      | 673.2736         | 1344.5559      | 672.7816         | G    | 2313.1948 | 1157.1010       | 2296.1682      | 1148.5877        | 2295.1842      | 1148.0957        | 21 |
| 15 | 1509.6348 | 755.3211        | 1492.6083      | 746.8078         | 1491.6243      | 746.3158         | F    | 2256.1733 | 1128.5903       | 2239.1468      | 1120.0770        | 2238.1627      | 1119.5850        | 20 |
| 16 | 1608.7033 | 804.8553        | 1591.6767      | 796.3420         | 1590.6927      | 795.8500         | V    | 2109.1049 | 1055.0561       | 2092.0783      | 1046.5428        | 2091.0943      | 1046.0508        | 19 |
| 17 | 1771.7666 | 886.3869        | 1754.7400      | 877.8737         | 1753.7560      | 877.3816         | Y    | 2010.0365 | 1005.5219       | 1993.0099      | 997.0086         | 1992.0259      | 996.5166         | 18 |
| 18 | 1884.8506 | 942.9290        | 1867.8241      | 934.4157         | 1866.8401      | 933.9237         | I    | 1846.9731 | 923.9902        | 1829.9466      | 915.4769         | 1828.9626      | 914.9849         | 17 |
| 19 | 1955.8878 | 978.4475        | 1938.8612      | 969.9342         | 1937.8772      | 969.4422         | A    | 1733.8891 | 867.4482        | 1716.8625      | 858.9349         | 1715.8785      | 858.4429         | 16 |
| 20 | 2012.9092 | 1006.9583       | 1995.8827      | 998.4450         | 1994.8987      | 997.9530         | G    | 1662.8520 | 831.9296        | 1645.8254      | 823.4163         | 1644.8414      | 822.9243         | 15 |
| 21 | 2141.0042 | 1071.0057       | 2123.9776      | 1062.4925        | 2122.9936      | 1062.0005        | K    | 1605.8305 | 803.4189        | 1588.8040      | 794.9056         | 1587.8199      | 794.4136         | 14 |
| 22 | 2301.0348 | 1151.0211       | 2284.0083      | 1142.5078        | 2283.0243      | 1142.0158        | C    | 1477.7355 | 739.3714        | 1460.7090      | 730.8581         | 1459.7250      | 730.3661         | 13 |
| 23 | 2358.0563 | 1179.5318       | 2341.0298      | 1171.0185        | 2340.0457      | 1170.5265        | G    | 1317.7049 | 659.3561        | 1300.6783      | 650.8428         | 1299.6943      | 650.3508         | 12 |

|    |           |           |           |           |           |           |   |           |          |           |          |           |          |    |
|----|-----------|-----------|-----------|-----------|-----------|-----------|---|-----------|----------|-----------|----------|-----------|----------|----|
| 24 | 2471.1404 | 1236.0738 | 2454.1138 | 1227.5605 | 2453.1298 | 1227.0685 | L | 1260.6834 | 630.8454 | 1243.6569 | 622.3321 | 1242.6729 | 621.8401 | 11 |
| 25 | 2570.2088 | 1285.6080 | 2553.1822 | 1277.0948 | 2552.1982 | 1276.6027 | V | 1147.5994 | 574.3033 | 1130.5728 | 565.7900 | 1129.5888 | 565.2980 | 10 |
| 26 | 2667.2615 | 1334.1344 | 2650.2350 | 1325.6211 | 2649.2510 | 1325.1291 | P | 1048.5310 | 524.7691 | 1031.5044 | 516.2558 | 1030.5204 | 515.7638 | 9  |
| 27 | 2766.3300 | 1383.6686 | 2749.3034 | 1375.1553 | 2748.3194 | 1374.6633 | V | 951.4782  | 476.2427 | 934.4516  | 467.7295 | 933.4676  | 467.2374 | 8  |
| 28 | 2879.4140 | 1440.2106 | 2862.3875 | 1431.6974 | 2861.4035 | 1431.2054 | L | 852.4098  | 426.7085 | 835.3832  | 418.1953 | 834.3992  | 417.7032 | 7  |
| 29 | 2950.4511 | 1475.7292 | 2933.4246 | 1467.2159 | 2932.4406 | 1466.7239 | A | 739.3257  | 370.1665 | 722.2992  | 361.6532 | 721.3151  | 361.1612 | 6  |
| 30 | 3079.4937 | 1540.2505 | 3062.4672 | 1531.7372 | 3061.4832 | 1531.2452 | E | 668.2886  | 334.6479 | 651.2620  | 326.1347 | 650.2780  | 325.6427 | 5  |
| 31 | 3193.5367 | 1597.2720 | 3176.5101 | 1588.7587 | 3175.5261 | 1588.2667 | N | 539.2460  | 270.1266 | 522.2195  | 261.6134 |           |          | 4  |
| 32 | 3356.6000 | 1678.8036 | 3339.5734 | 1670.2904 | 3338.5894 | 1669.7983 | Y | 425.2031  | 213.1052 | 408.1765  | 204.5919 |           |          | 3  |
| 33 | 3471.6269 | 1736.3171 | 3454.6004 | 1727.8038 | 3453.6164 | 1727.3118 | N | 262.1397  | 131.5735 | 245.1132  | 123.0602 |           |          | 2  |
| 34 |           |           |           |           |           |           | K | 147.1128  | 74.0600  | 130.0863  | 65.5468  |           |          | 1  |

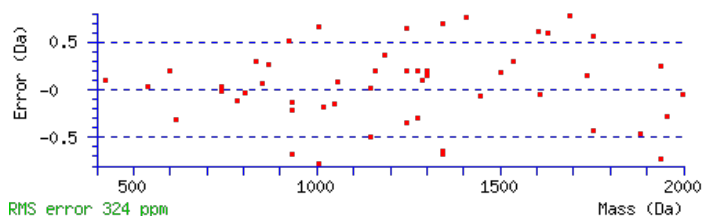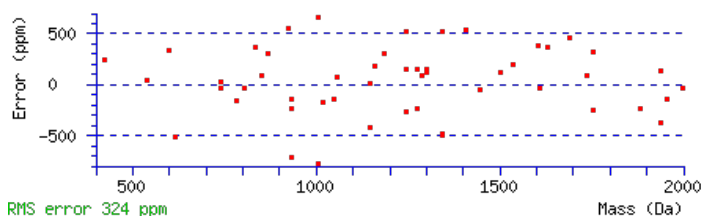

NCBI BLAST search of [IMNGEADAMSLDGGFVYIAGKCGLVPVLAENYK](#)

(Parameters: blastp, nr protein database, expect=20000, no filter, PAM30)

Other BLAST [web gateways](#)

All matches to this query

| Score | Mr(calc)  | Delta  | Sequence                                          | Site Analysis         |
|-------|-----------|--------|---------------------------------------------------|-----------------------|
| 89.3  | 3616.7251 | 0.0157 | <a href="#">IMNGEADAMSLDGGFVYIAGKCGLVPVLAENYK</a> | Deamidated N33 58.38% |
| 87.8  | 3616.7251 | 0.0157 | <a href="#">IMNGEADAMSLDGGFVYIAGKCGLVPVLAENYK</a> | Deamidated N31 41.62% |
| 53.8  | 3615.7411 | 0.9997 | <a href="#">IMNGEADAMSLDGGFVYIAGKCGLVPVLAENYK</a> |                       |
| 47.6  | 3616.7251 | 0.0157 | <a href="#">IMNGEADAMSLDGGFVYIAGKCGLVPVLAENYK</a> | Deamidated N3 0.00%   |
| 3.6   | 3616.7290 | 0.0118 | <a href="#">LVCNLSRKVWIYQDSNTGVSHCEEQPQIPTK</a>   |                       |
| 3.6   | 3615.7501 | 0.9908 | <a href="#">AIGEKEKLYTLEAASNISLLDAGQNQCSVYAEK</a> |                       |
| 3.6   | 3615.7501 | 0.9908 | <a href="#">AIGEKEKLYTLEAASNISLLDAGQNQCSVYAEK</a> |                       |
| 3.6   | 3615.7501 | 0.9908 | <a href="#">AIGEKEKLYTLEAASNISLLDAGQNQCSVYAEK</a> |                       |
| 3.6   | 3615.7501 | 0.9908 | <a href="#">AIGEKEKLYTLEAASNISLLDAGQNQCSVYAEK</a> |                       |
| 3.3   | 3616.7290 | 0.0118 | <a href="#">LVCNLSRKVWIYQDSNTGVSHCEEQPQIPTK</a>   |                       |

Mascot: <http://www.matrixscience.com/>

# MASCOT SCIENCE Mascot Search Results

## Peptide View

MS/MS Fragmentation of **QQQH<sup>+</sup>LF<sup>+</sup>GS<sup>+</sup>NV<sup>+</sup>TD<sup>+</sup>CS<sup>+</sup>GN<sup>+</sup>F<sup>+</sup>CL<sup>+</sup>R**

Found in **J3KN47** in **con\_Xuniprot\_HUMAN3**, J3KN47\_HUMAN Serotransferrin OS=Homo sapiens GN=TF PE=2 SV=1

Match to Query 21662: 2515.109248 from(1258.561900,2+) intensity(36848.5430) rtinseconds(1870) scans(4780) index(24658)

Title: 111019\_Est\_MI\_YS\_G\_06Spectrum4153\_scans\_\_4780

Data file C:\mascot\20140703\_Tmgf\_1D\CSV\_UseAnalysis\MasterCSV\All\_Glyco\mgf\ptm\UC18ERLIC\_PTM\_35D.mgf

Click mouse within plot area to zoom in by factor of two about that point

Or, to Da

Label all possible matches Label matches used for scoring

Show Y-axis

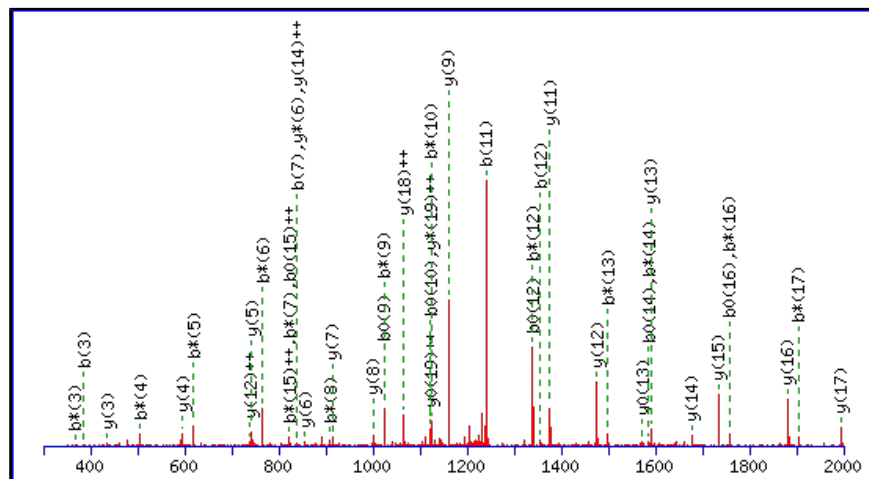

Monoisotopic mass of neutral peptide Mr(calc): 2515.1009

Fixed modifications: Carbamidomethyl (C) (apply to specified residues or termini only)

Variable modifications:

N9 : Deamidated (NQ)

Ions Score: 85 Expect: 3.7e-007

Matches : 45/212 fragment ions using 68 most intense peaks ([help](#))

| #  | b                | b <sup>++</sup> | b*               | b <sup>*++</sup> | b <sup>0</sup>   | b <sup>0++</sup> | Seq. | y                | y <sup>++</sup>  | y*              | y <sup>*++</sup> | y <sup>0</sup>   | y <sup>0++</sup> | #  |
|----|------------------|-----------------|------------------|------------------|------------------|------------------|------|------------------|------------------|-----------------|------------------|------------------|------------------|----|
| 1  | 129.0659         | 65.0366         | 112.0393         | 56.5233          |                  |                  | Q    |                  |                  |                 |                  |                  |                  | 21 |
| 2  | 257.1244         | 129.0659        | 240.0979         | 120.5526         |                  |                  | Q    | 2388.0496        | 1194.5284        | 2371.0230       | 1186.0152        | 2370.0390        | 1185.5231        | 20 |
| 3  | <b>385.1830</b>  | 193.0951        | <b>368.1565</b>  | 184.5819         |                  |                  | Q    | 2259.9910        | 1130.4991        | 2242.9645       | <b>1121.9859</b> | 2241.9804        | <b>1121.4939</b> | 19 |
| 4  | 522.2419         | 261.6246        | <b>505.2154</b>  | 253.1113         |                  |                  | H    | 2131.9324        | <b>1066.4698</b> | 2114.9059       | 1057.9566        | 2113.9219        | 1057.4646        | 18 |
| 5  | 635.3260         | 318.1666        | <b>618.2994</b>  | 309.6534         |                  |                  | L    | <b>1994.8735</b> | 997.9404         | 1977.8470       | 989.4271         | 1976.8629        | 988.9351         | 17 |
| 6  | 782.3944         | 391.7008        | <b>765.3679</b>  | 383.1876         |                  |                  | F    | <b>1881.7894</b> | 941.3984         | 1864.7629       | 932.8851         | 1863.7789        | 932.3931         | 16 |
| 7  | <b>839.4159</b>  | 420.2116        | <b>822.3893</b>  | 411.6983         |                  |                  | G    | <b>1734.7210</b> | 867.8642         | 1717.6945       | 859.3509         | 1716.7105        | 858.8589         | 15 |
| 8  | 926.4479         | 463.7276        | <b>909.4213</b>  | 455.2143         | 908.4373         | 454.7223         | S    | <b>1677.6996</b> | <b>839.3534</b>  | 1660.6730       | 830.8401         | 1659.6890        | 830.3481         | 14 |
| 9  | 1041.4748        | 521.2411        | <b>1024.4483</b> | 512.7278         | <b>1023.4643</b> | 512.2358         | N    | <b>1590.6675</b> | 795.8374         | 1573.6410       | 787.3241         | <b>1572.6570</b> | 786.8321         | 13 |
| 10 | 1140.5432        | 570.7753        | <b>1123.5167</b> | 562.2620         | <b>1122.5327</b> | 561.7700         | V    | <b>1475.6406</b> | <b>738.3239</b>  | 1458.6140       | 729.8107         | 1457.6300        | 729.3187         | 12 |
| 11 | <b>1241.5909</b> | 621.2991        | 1224.5644        | 612.7858         | 1223.5804        | 612.2938         | T    | <b>1376.5722</b> | 688.7897         | 1359.5456       | 680.2765         | 1358.5616        | 679.7844         | 11 |
| 12 | <b>1356.6179</b> | 678.8126        | <b>1339.5913</b> | 670.2993         | <b>1338.6073</b> | 669.8073         | D    | 1275.5245        | 638.2659         | 1258.4980       | 629.7526         | 1257.5139        | 629.2606         | 10 |
| 13 | 1516.6485        | 758.8279        | <b>1499.6220</b> | 750.3146         | 1498.6380        | 749.8226         | C    | <b>1160.4976</b> | 580.7524         | 1143.4710       | 572.2391         | 1142.4870        | 571.7471         | 9  |
| 14 | 1603.6805        | 802.3439        | <b>1586.6540</b> | 793.8306         | <b>1585.6700</b> | 793.3386         | S    | <b>1000.4669</b> | 500.7371         | 983.4404        | 492.2238         | 982.4563         | 491.7318         | 8  |
| 15 | 1660.7020        | 830.8546        | 1643.6755        | <b>822.3414</b>  | 1642.6914        | <b>821.8494</b>  | G    | <b>913.4349</b>  | 457.2211         | 896.4083        | 448.7078         |                  |                  | 7  |
| 16 | 1774.7449        | 887.8761        | <b>1757.7184</b> | 879.3628         | <b>1756.7344</b> | 878.8708         | N    | <b>856.4134</b>  | 428.7103         | <b>839.3869</b> | 420.1971         |                  |                  | 6  |
| 17 | 1921.8134        | 961.4103        | <b>1904.7868</b> | 952.8970         | 1903.8028        | 952.4050         | F    | <b>742.3705</b>  | 371.6889         | 725.3439        | 363.1756         |                  |                  | 5  |
| 18 | 2081.8440        | 1041.4256       | 2064.8175        | 1032.9124        | 2063.8334        | 1032.4204        | C    | <b>595.3021</b>  | 298.1547         | 578.2755        | 289.6414         |                  |                  | 4  |
| 19 | 2194.9281        | 1097.9677       | 2177.9015        | 1089.4544        | 2176.9175        | 1088.9624        | L    | <b>435.2714</b>  | 218.1394         | 418.2449        | 209.6261         |                  |                  | 3  |
| 20 | 2341.9965        | 1171.5019       | 2324.9699        | 1162.9886        | 2323.9859        | 1162.4966        | F    | 322.1874         | 161.5973         | 305.1608        | 153.0840         |                  |                  | 2  |
| 21 |                  |                 |                  |                  |                  |                  | R    | 175.1190         | 88.0631          | 158.0924        | 79.5498          |                  |                  | 1  |

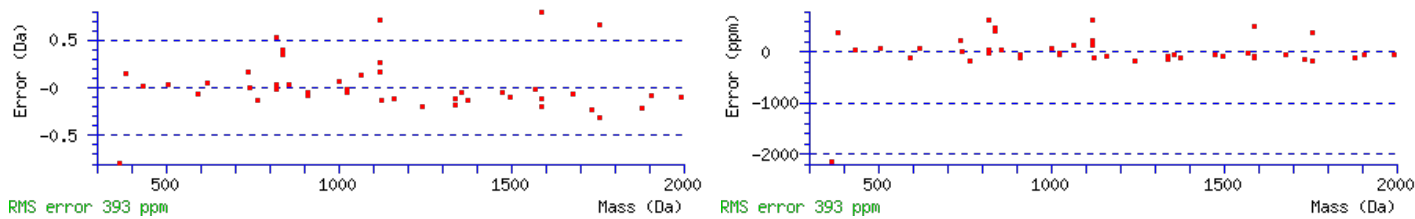

NCBI BLAST search of [QQQHLEFGSNVTDCSGNFCLER](#)  
 (Parameters: blastp, nr protein database, expect=20000, no filter, PAM30)  
 Other BLAST [web gateways](#)

All matches to this query

| Score | Mr(calc)  | Delta   | Sequence                                | Site Analysis        |
|-------|-----------|---------|-----------------------------------------|----------------------|
| 85.0  | 2515.1009 | 0.0083  | <a href="#">QQQHLEFGSNVTDCSGNFCLER</a>  | Deamidated N9 99.95% |
| 46.9  | 2515.1009 | 0.0083  | <a href="#">QQQHLEFGSNVTDCSGNFCLER</a>  | Deamidated Q3 0.02%  |
| 46.9  | 2515.1009 | 0.0083  | <a href="#">QQQHLEFGSNVTDCSGNFCLER</a>  | Deamidated Q2 0.02%  |
| 46.9  | 2515.1009 | 0.0083  | <a href="#">QQQHLEFGSNVTDCSGNFCLER</a>  | Deamidated Q1 0.02%  |
| 42.7  | 2515.1009 | 0.0083  | <a href="#">QQQHLEFGSNVTDCSGNFCLER</a>  | Deamidated N16 0.01% |
| 40.9  | 2514.1169 | 0.9923  | <a href="#">QQQHLEFGSNVTDCSGNFCLER</a>  |                      |
| 5.0   | 2515.1161 | -0.0069 | <a href="#">NRYSLDYHQHCROYEPLSM</a>     |                      |
| 1.1   | 2515.1148 | -0.0055 | <a href="#">YVLQDARDNDFGSEFHIMGGPMK</a> |                      |
| 0.6   | 2515.1148 | -0.0055 | <a href="#">YVLQDARDNDFGSEFHIMGGPMK</a> |                      |

Mascot: <http://www.matrixscience.com/>



# MASCOT SCIENCE Mascot Search Results

## Peptide View

MS/MS Fragmentation of **ILRQQQHFLFGSNVTDCSGNFCLFR**

Found in **J3KN47** in **con\_Xuniprot\_HUMAN3**, J3KN47\_HUMAN Serotransferrin OS=Homo sapiens GN=TF PE=2 SV=1

Match to Query 26149: 2898.365712 from(967.129180,3+) intensity(47065.1914) rtinseconds(1831) scans(4456) index(10201)

Title: 111019\_Est\_ISCardio\_NMI\_YS\_G\_6Spectrum3786\_scans\_\_4456

Data file C:\mascot\20140703\_Tmgf\_1D\CSV\_UseAnalysis\MasterCSV\All\_Glyco\mgf\ptm\UC18ERLIC\_PTM\_35D.mgf

Click mouse within plot area to zoom in by factor of two about that point

Or, to Da

Label all possible matches Label matches used for scoring

Show Y-axis

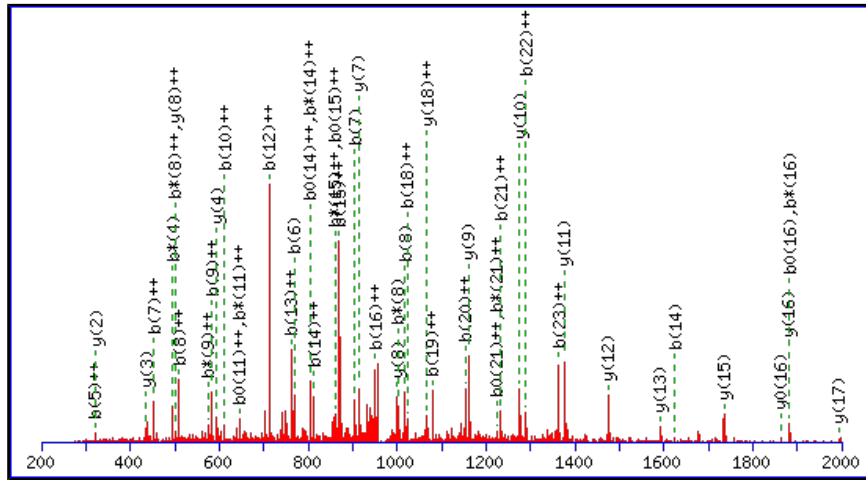

Monoisotopic mass of neutral peptide Mr(calc): 2898.3541

Fixed modifications: Carbamidomethyl (C) (apply to specified residues or termini only)

Variable modifications:

Q4 : Deamidated (NQ)

N12 : Deamidated (NQ)

Ions Score: 78 Expect: 3.4e-006

Matches : 50/238 fragment ions using 107 most intense peaks ([help](#))

| #  | b         | b <sup>++</sup> | b <sup>*</sup> | b <sup>*++</sup> | b <sup>0</sup> | b <sup>0++</sup> | Seq. | y         | y <sup>++</sup> | y <sup>*</sup> | y <sup>*++</sup> | y <sup>0</sup> | y <sup>0++</sup> | #  |
|----|-----------|-----------------|----------------|------------------|----------------|------------------|------|-----------|-----------------|----------------|------------------|----------------|------------------|----|
| 1  | 114.0913  | 57.5493         |                |                  |                |                  | I    |           |                 |                |                  |                |                  | 24 |
| 2  | 227.1754  | 114.0913        |                |                  |                |                  | L    | 2786.2773 | 1393.6423       | 2769.2508      | 1385.1290        | 2768.2668      | 1384.6370        | 23 |
| 3  | 383.2765  | 192.1419        | 366.2500       | 183.6286         |                |                  | R    | 2673.1933 | 1337.1003       | 2656.1667      | 1328.5870        | 2655.1827      | 1328.0950        | 22 |
| 4  | 512.3191  | 256.6632        | 495.2926       | 248.1499         |                |                  | Q    | 2517.0922 | 1259.0497       | 2500.0656      | 1250.5364        | 2499.0816      | 1250.0444        | 21 |
| 5  | 640.3777  | 320.6925        | 623.3511       | 312.1792         |                |                  | Q    | 2388.0496 | 1194.5284       | 2371.0230      | 1186.0152        | 2370.0390      | 1185.5231        | 20 |
| 6  | 768.4363  | 384.7218        | 751.4097       | 376.2085         |                |                  | Q    | 2259.9910 | 1130.4991       | 2242.9645      | 1121.9859        | 2241.9804      | 1121.4939        | 19 |
| 7  | 905.4952  | 453.2512        | 888.4686       | 444.7380         |                |                  | H    | 2131.9324 | 1066.4698       | 2114.9059      | 1057.9566        | 2113.9219      | 1057.4646        | 18 |
| 8  | 1018.5792 | 509.7933        | 1001.5527      | 501.2800         |                |                  | L    | 1994.8735 | 997.9404        | 1977.8470      | 989.4271         | 1976.8629      | 988.9351         | 17 |
| 9  | 1165.6477 | 583.3275        | 1148.6211      | 574.8142         |                |                  | F    | 1881.7894 | 941.3984        | 1864.7629      | 932.8851         | 1863.7789      | 932.3931         | 16 |
| 10 | 1222.6691 | 611.8382        | 1205.6426      | 603.3249         |                |                  | G    | 1734.7210 | 867.8642        | 1717.6945      | 859.3509         | 1716.7105      | 858.8589         | 15 |
| 11 | 1309.7011 | 655.3542        | 1292.6746      | 646.8409         | 1291.6906      | 646.3489         | S    | 1677.6996 | 839.3534        | 1660.6730      | 830.8401         | 1659.6890      | 830.3481         | 14 |
| 12 | 1424.7281 | 712.8677        | 1407.7015      | 704.3544         | 1406.7175      | 703.8624         | N    | 1590.6675 | 795.8374        | 1573.6410      | 787.3241         | 1572.6570      | 786.8321         | 13 |
| 13 | 1523.7965 | 762.4019        | 1506.7700      | 753.8886         | 1505.7859      | 753.3966         | V    | 1475.6406 | 738.3239        | 1458.6140      | 729.8107         | 1457.6300      | 729.3187         | 12 |
| 14 | 1624.8442 | 812.9257        | 1607.8176      | 804.4125         | 1606.8336      | 803.9204         | T    | 1376.5722 | 688.7897        | 1359.5456      | 680.2765         | 1358.5616      | 679.7844         | 11 |
| 15 | 1739.8711 | 870.4392        | 1722.8446      | 861.9259         | 1721.8606      | 861.4339         | D    | 1275.5245 | 638.2659        | 1258.4980      | 629.7526         | 1257.5139      | 629.2606         | 10 |
| 16 | 1899.9018 | 950.4545        | 1882.8752      | 941.9413         | 1881.8912      | 941.4492         | C    | 1160.4976 | 580.7524        | 1143.4710      | 572.2391         | 1142.4870      | 571.7471         | 9  |
| 17 | 1986.9338 | 993.9705        | 1969.9073      | 985.4573         | 1968.9232      | 984.9653         | S    | 1000.4669 | 500.7371        | 983.4404       | 492.2238         | 982.4563       | 491.7318         | 8  |
| 18 | 2043.9553 | 1022.4813       | 2026.9287      | 1013.9680        | 2025.9447      | 1013.4760        | G    | 913.4349  | 457.2211        | 896.4083       | 448.7078         |                |                  | 7  |
| 19 | 2157.9982 | 1079.5027       | 2140.9716      | 1070.9895        | 2139.9876      | 1070.4975        | N    | 856.4134  | 428.7103        | 839.3869       | 420.1971         |                |                  | 6  |
| 20 | 2305.0666 | 1153.0369       | 2288.0401      | 1144.5237        | 2287.0560      | 1144.0317        | F    | 742.3705  | 371.6889        | 725.3439       | 363.1756         |                |                  | 5  |
| 21 | 2465.0973 | 1233.0523       | 2448.0707      | 1224.5390        | 2447.0867      | 1224.0470        | C    | 595.3021  | 298.1547        | 578.2755       | 289.6414         |                |                  | 4  |
| 22 | 2578.1813 | 1289.5943       | 2561.1548      | 1281.0810        | 2560.1708      | 1280.5890        | L    | 435.2714  | 218.1394        | 418.2449       | 209.6261         |                |                  | 3  |



|    |           |                  |           |           |           |           |   |                 |          |          |          |  |  |   |
|----|-----------|------------------|-----------|-----------|-----------|-----------|---|-----------------|----------|----------|----------|--|--|---|
| 23 | 2725.2497 | <b>1363.1285</b> | 2708.2232 | 1354.6152 | 2707.2392 | 1354.1232 | F | <b>322.1874</b> | 161.5973 | 305.1608 | 153.0840 |  |  | 2 |
| 24 |           |                  |           |           |           |           | R | 175.1190        | 88.0631  | 158.0924 | 79.5498  |  |  | 1 |

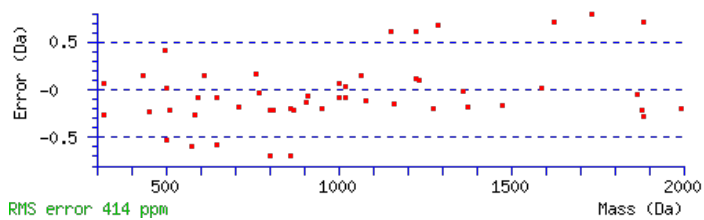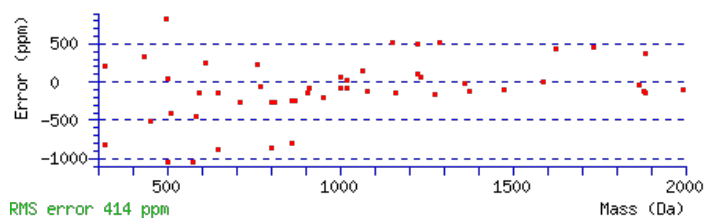

NCBI BLAST search of [ILRQQQHLEFGSNVTDCSGNFCLER](#)

(Parameters: blastp, nr protein database, expect=20000, no filter, PAM30)

Other BLAST [web gateways](#)

All matches to this query

| Score | Mr(calc)  | Delta  | Sequence                                  | Site Analysis             |
|-------|-----------|--------|-------------------------------------------|---------------------------|
| 78.4  | 2898.3541 | 0.0116 | <a href="#">ILRQQQHLEFGSNVTDCSGNFCLER</a> | Deamidated Q4, N12 36.70% |
| 77.3  | 2898.3541 | 0.0116 | <a href="#">ILRQQQHLEFGSNVTDCSGNFCLER</a> | Deamidated Q6, N12 28.49% |
| 77.3  | 2898.3541 | 0.0116 | <a href="#">ILRQQQHLEFGSNVTDCSGNFCLER</a> | Deamidated Q5, N12 28.49% |
| 65.4  | 2898.3541 | 0.0116 | <a href="#">ILRQQQHLEFGSNVTDCSGNFCLER</a> | Deamidated Q4, N19 1.82%  |
| 64.4  | 2898.3541 | 0.0116 | <a href="#">ILRQQQHLEFGSNVTDCSGNFCLER</a> | Deamidated Q5, N19 1.45%  |
| 63.5  | 2898.3541 | 0.0116 | <a href="#">ILRQQQHLEFGSNVTDCSGNFCLER</a> | Deamidated Q6, N19 1.17%  |
| 60.0  | 2898.3541 | 0.0116 | <a href="#">ILRQQQHLEFGSNVTDCSGNFCLER</a> | Deamidated Q4, Q6 0.53%   |
| 59.9  | 2898.3541 | 0.0116 | <a href="#">ILRQQQHLEFGSNVTDCSGNFCLER</a> | Deamidated Q5, Q6 0.52%   |
| 59.6  | 2898.3541 | 0.0116 | <a href="#">ILRQQQHLEFGSNVTDCSGNFCLER</a> | Deamidated Q4, Q5 0.49%   |
| 58.9  | 2897.3701 | 0.9956 | <a href="#">ILRQQQHLEFGSNVTDCSGNFCLER</a> |                           |

Mascot: <http://www.matrixscience.com/>

# MATRIX SCIENCE Mascot Search Results

## Peptide View

MS/MS Fragmentation of **QQQHFLGNSVTD CSGNFCLFR**

Found in **J3KN47** in **con\_Xuniprot\_HUMAN3**, J3KN47\_HUMAN Serotransferrin OS=Homo sapiens GN=TF PE=2 SV=1

Match to Query 21801: 2516.093588 from(1259.054070,2+) intensity(29714.0586) rtinseconds(1887) scans(4901) index(15977)

Title: 111019\_Est\_MI\_YP\_G\_05Spectrum4159\_scans\_\_4901

Data file C:\\mascot\\20140703\_Tmgf\_1D\\CSV\_UseAnalysis\\MasterCSV\\All\_Glyco\\mgf\\ptm\\UC18ERLIC\_PTM\_35D.mgf

Click mouse within plot area to zoom in by factor of two about that point

Or, to Da

Label all possible matches Label matches used for scoring

Show Y-axis

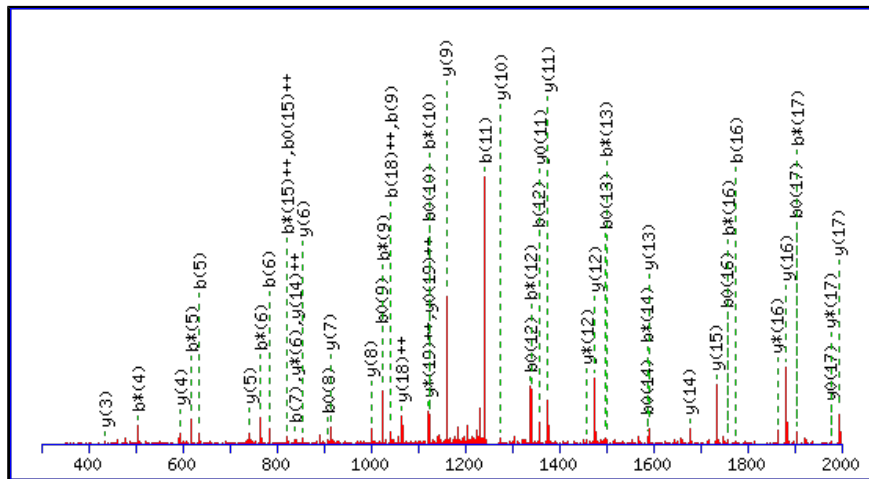

Monoisotopic mass of neutral peptide Mr(calc): 2516.0849

Fixed modifications: Carbamidomethyl (C) (apply to specified residues or termini only)

Variable modifications:

Q3 : Deamidated (NQ)

N9 : Deamidated (NQ)

Ions Score: 75 Expect: 2.7e-006

Matches : 53/212 fragment ions using 102 most intense peaks ([help](#))

| #  | b         | b <sup>++</sup> | b*        | b <sup>*++</sup> | b <sup>0</sup> | b <sup>0++</sup> | Seq. | y         | y <sup>++</sup> | y*        | y <sup>*++</sup> | y <sup>0</sup> | y <sup>0++</sup> | #  |
|----|-----------|-----------------|-----------|------------------|----------------|------------------|------|-----------|-----------------|-----------|------------------|----------------|------------------|----|
| 1  | 129.0659  | 65.0366         | 112.0393  | 56.5233          |                |                  | Q    |           |                 |           |                  |                |                  | 21 |
| 2  | 257.1244  | 129.0659        | 240.0979  | 120.5526         |                |                  | Q    | 2389.0336 | 1195.0204       | 2372.0070 | 1186.5072        | 2371.0230      | 1186.0152        | 20 |
| 3  | 386.1670  | 193.5872        | 369.1405  | 185.0739         |                |                  | Q    | 2260.9750 | 1130.9911       | 2243.9485 | 1122.4779        | 2242.9645      | 1121.9859        | 19 |
| 4  | 523.2259  | 262.1166        | 506.1994  | 253.6033         |                |                  | H    | 2131.9324 | 1066.4698       | 2114.9059 | 1057.9566        | 2113.9219      | 1057.4646        | 18 |
| 5  | 636.3100  | 318.6586        | 619.2835  | 310.1454         |                |                  | L    | 1994.8735 | 997.9404        | 1977.8470 | 989.4271         | 1976.8629      | 988.9351         | 17 |
| 6  | 783.3784  | 392.1928        | 766.3519  | 383.6796         |                |                  | F    | 1881.7894 | 941.3984        | 1864.7629 | 932.8851         | 1863.7789      | 932.3931         | 16 |
| 7  | 840.3999  | 420.7036        | 823.3733  | 412.1903         |                |                  | G    | 1734.7210 | 867.8642        | 1717.6945 | 859.3509         | 1716.7105      | 858.8589         | 15 |
| 8  | 927.4319  | 464.2196        | 910.4054  | 455.7063         | 909.4213       | 455.2143         | S    | 1677.6996 | 839.3534        | 1660.6730 | 830.8401         | 1659.6890      | 830.3481         | 14 |
| 9  | 1042.4589 | 521.7331        | 1025.4323 | 513.2198         | 1024.4483      | 512.7278         | N    | 1590.6675 | 795.8374        | 1573.6410 | 787.3241         | 1572.6570      | 786.8321         | 13 |
| 10 | 1141.5273 | 571.2673        | 1124.5007 | 562.7540         | 1123.5167      | 562.2620         | V    | 1475.6406 | 738.3239        | 1458.6140 | 729.8107         | 1457.6300      | 729.3187         | 12 |
| 11 | 1242.5749 | 621.7911        | 1225.5484 | 613.2778         | 1224.5644      | 612.7858         | T    | 1376.5722 | 688.7897        | 1359.5456 | 680.2765         | 1358.5616      | 679.7844         | 11 |
| 12 | 1357.6019 | 679.3046        | 1340.5753 | 670.7913         | 1339.5913      | 670.2993         | D    | 1275.5245 | 638.2659        | 1258.4980 | 629.7526         | 1257.5139      | 629.2606         | 10 |
| 13 | 1517.6325 | 759.3199        | 1500.6060 | 750.8066         | 1499.6220      | 750.3146         | C    | 1160.4976 | 580.7524        | 1143.4710 | 572.2391         | 1142.4870      | 571.7471         | 9  |
| 14 | 1604.6646 | 802.8359        | 1587.6380 | 794.3226         | 1586.6540      | 793.8306         | S    | 1000.4669 | 500.7371        | 983.4404  | 492.2238         | 982.4563       | 491.7318         | 8  |
| 15 | 1661.6860 | 831.3467        | 1644.6595 | 822.8334         | 1643.6755      | 822.3414         | G    | 913.4349  | 457.2211        | 896.4083  | 448.7078         |                |                  | 7  |
| 16 | 1775.7290 | 888.3681        | 1758.7024 | 879.8548         | 1757.7184      | 879.3628         | N    | 856.4134  | 428.7103        | 839.3869  | 420.1971         |                |                  | 6  |
| 17 | 1922.7974 | 961.9023        | 1905.7708 | 953.3890         | 1904.7868      | 952.8970         | F    | 742.3705  | 371.6889        | 725.3439  | 363.1756         |                |                  | 5  |
| 18 | 2082.8280 | 1041.9176       | 2065.8015 | 1033.4044        | 2064.8175      | 1032.9124        | C    | 595.3021  | 298.1547        | 578.2755  | 289.6414         |                |                  | 4  |
| 19 | 2195.9121 | 1098.4597       | 2178.8855 | 1089.9464        | 2177.9015      | 1089.4544        | L    | 435.2714  | 218.1394        | 418.2449  | 209.6261         |                |                  | 3  |
| 20 | 2342.9805 | 1171.9939       | 2325.9539 | 1163.4806        | 2324.9699      | 1162.9886        | F    | 322.1874  | 161.5973        | 305.1608  | 153.0840         |                |                  | 2  |
| 21 |           |                 |           |                  |                |                  | R    | 175.1190  | 88.0631         | 158.0924  | 79.5498          |                |                  | 1  |

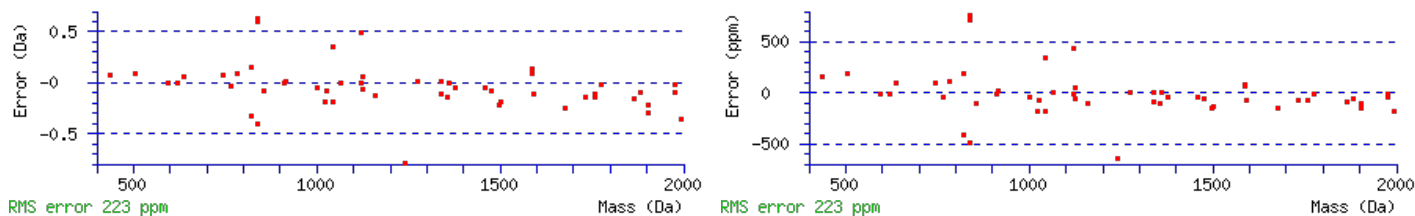

NCBI BLAST search of [QQQHLEFGSNVTDCSGNFCLER](#)  
 (Parameters: blastp, nr protein database, expect=20000, no filter, PAM30)  
 Other BLAST [web gateways](#)

All matches to this query

| Score | Mr(calc)  | Delta  | Sequence                               | Site Analysis            |
|-------|-----------|--------|----------------------------------------|--------------------------|
| 75.2  | 2516.0849 | 0.0087 | <a href="#">QQQHLEFGSNVTDCSGNFCLER</a> | Deamidated Q3, N9 32.88% |
| 75.2  | 2516.0849 | 0.0087 | <a href="#">QQQHLEFGSNVTDCSGNFCLER</a> | Deamidated Q2, N9 32.88% |
| 75.2  | 2516.0849 | 0.0087 | <a href="#">QQQHLEFGSNVTDCSGNFCLER</a> | Deamidated Q1, N9 32.88% |
| 56.2  | 2516.0849 | 0.0087 | <a href="#">QQQHLEFGSNVTDCSGNFCLER</a> | Deamidated Q3, N16 0.42% |
| 56.2  | 2516.0849 | 0.0087 | <a href="#">QQQHLEFGSNVTDCSGNFCLER</a> | Deamidated Q2, N16 0.42% |
| 56.2  | 2516.0849 | 0.0087 | <a href="#">QQQHLEFGSNVTDCSGNFCLER</a> | Deamidated Q1, N16 0.42% |
| 53.6  | 2515.1009 | 0.9927 | <a href="#">QQQHLEFGSNVTDCSGNFCLER</a> |                          |
| 46.7  | 2516.0849 | 0.0087 | <a href="#">QQQHLEFGSNVTDCSGNFCLER</a> | Deamidated N9, N16 0.05% |
| 42.5  | 2516.0849 | 0.0087 | <a href="#">QQQHLEFGSNVTDCSGNFCLER</a> | Deamidated Q2, Q3 0.02%  |
| 42.5  | 2516.0849 | 0.0087 | <a href="#">QQQHLEFGSNVTDCSGNFCLER</a> | Deamidated Q1, Q3 0.02%  |

Mascot: <http://www.matrixscience.com/>

# MATRIX SCIENCE Mascot Search Results

## Peptide View

MS/MS Fragmentation of **ILRQQHLFGSNVTDCSGNFCLFR**

Found in **J3KN47** in **con\_Xuniprot\_HUMAN3**, J3KN47\_HUMAN Serotransferrin OS=Homo sapiens GN=TF PE=2 SV=1

Match to Query 26144: 2898.351642 from(967.124490,3+) intensity(28517.1113) rtinseconds(1817) scans(4575) index(11040)

Title: 111019\_Est\_ISCardio\_NMI\_YS\_G\_7Spectrum3873\_scans\_\_4575

Data file C:\mascot\20140703\_Tmgf\_1D\CSV\_UseAnalysis\MasterCSV\All\_Glyco\mgf\ptm\UC18ERLIC\_PTM\_35D.mgf

Click mouse within plot area to zoom in by factor of two about that point

Or, to Da

Label all possible matches Label matches used for scoring

Show Y-axis

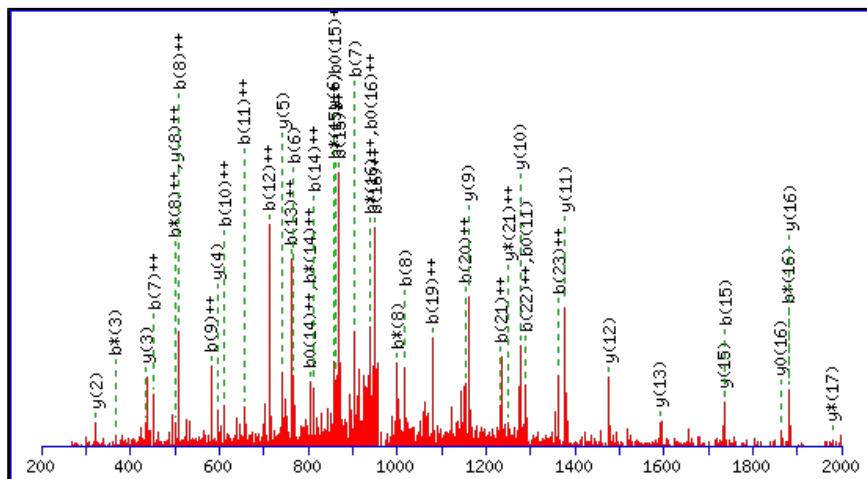

Monoisotopic mass of neutral peptide Mr(calc): 2898.3541

Fixed modifications: Carbamidomethyl (C) (apply to specified residues or termini only)

Variable modifications:

N12 : Deamidated (NQ)

N19 : Deamidated (NQ)

Ions Score: 69 Expect: 2.7e-005

Matches : 46/238 fragment ions using 90 most intense peaks ([help](#))

| #  | b         | b <sup>++</sup> | b <sup>*</sup> | b <sup>*++</sup> | b <sup>0</sup> | b <sup>0++</sup> | Seq. | y         | y <sup>++</sup> | y <sup>*</sup> | y <sup>*++</sup> | y <sup>0</sup> | y <sup>0++</sup> | #  |
|----|-----------|-----------------|----------------|------------------|----------------|------------------|------|-----------|-----------------|----------------|------------------|----------------|------------------|----|
| 1  | 114.0913  | 57.5493         |                |                  |                |                  | I    |           |                 |                |                  |                |                  | 24 |
| 2  | 227.1754  | 114.0913        |                |                  |                |                  | L    | 2786.2773 | 1393.6423       | 2769.2508      | 1385.1290        | 2768.2668      | 1384.6370        | 23 |
| 3  | 383.2765  | 192.1419        | 366.2500       | 183.6286         |                |                  | R    | 2673.1933 | 1337.1003       | 2656.1667      | 1328.5870        | 2655.1827      | 1328.0950        | 22 |
| 4  | 511.3351  | 256.1712        | 494.3085       | 247.6579         |                |                  | Q    | 2517.0922 | 1259.0497       | 2500.0656      | 1250.5364        | 2499.0816      | 1250.0444        | 21 |
| 5  | 639.3937  | 320.2005        | 622.3671       | 311.6872         |                |                  | Q    | 2389.0336 | 1195.0204       | 2372.0070      | 1186.5072        | 2371.0230      | 1186.0152        | 20 |
| 6  | 767.4522  | 384.2298        | 750.4257       | 375.7165         |                |                  | Q    | 2260.9750 | 1130.9911       | 2243.9485      | 1122.4779        | 2242.9645      | 1121.9859        | 19 |
| 7  | 904.5112  | 452.7592        | 887.4846       | 444.2459         |                |                  | H    | 2132.9164 | 1066.9619       | 2115.8899      | 1058.4486        | 2114.9059      | 1057.9566        | 18 |
| 8  | 1017.5952 | 509.3013        | 1000.5687      | 500.7880         |                |                  | L    | 1995.8575 | 998.4324        | 1978.8310      | 989.9191         | 1977.8470      | 989.4271         | 17 |
| 9  | 1164.6636 | 582.8355        | 1147.6371      | 574.3222         |                |                  | F    | 1882.7735 | 941.8904        | 1865.7469      | 933.3771         | 1864.7629      | 932.8851         | 16 |
| 10 | 1221.6851 | 611.3462        | 1204.6586      | 602.8329         |                |                  | G    | 1735.7050 | 868.3562        | 1718.6785      | 859.8429         | 1717.6945      | 859.3509         | 15 |
| 11 | 1308.7171 | 654.8622        | 1291.6906      | 646.3489         | 1290.7066      | 645.8569         | S    | 1678.6836 | 839.8454        | 1661.6570      | 831.3322         | 1660.6730      | 830.8401         | 14 |
| 12 | 1423.7441 | 712.3757        | 1406.7175      | 703.8624         | 1405.7335      | 703.3704         | N    | 1591.6516 | 796.3294        | 1574.6250      | 787.8161         | 1573.6410      | 787.3241         | 13 |
| 13 | 1522.8125 | 761.9099        | 1505.7859      | 753.3966         | 1504.8019      | 752.9046         | V    | 1476.6246 | 738.8159        | 1459.5981      | 730.3027         | 1458.6140      | 729.8107         | 12 |
| 14 | 1623.8602 | 812.4337        | 1606.8336      | 803.9204         | 1605.8496      | 803.4284         | T    | 1377.5562 | 689.2817        | 1360.5296      | 680.7685         | 1359.5456      | 680.2765         | 11 |
| 15 | 1738.8871 | 869.9472        | 1721.8606      | 861.4339         | 1720.8765      | 860.9419         | D    | 1276.5085 | 638.7579        | 1259.4820      | 630.2446         | 1258.4980      | 629.7526         | 10 |
| 16 | 1898.9178 | 949.9625        | 1881.8912      | 941.4492         | 1880.9072      | 940.9572         | C    | 1161.4816 | 581.2444        | 1144.4550      | 572.7312         | 1143.4710      | 572.2391         | 9  |
| 17 | 1985.9498 | 993.4785        | 1968.9232      | 984.9653         | 1967.9392      | 984.4732         | S    | 1001.4509 | 501.2291        | 984.4244       | 492.7158         | 983.4404       | 492.2238         | 8  |
| 18 | 2042.9713 | 1021.9893       | 2025.9447      | 1013.4760        | 2024.9607      | 1012.9840        | G    | 914.4189  | 457.7131        | 897.3924       | 449.1998         |                |                  | 7  |
| 19 | 2157.9982 | 1079.5027       | 2140.9716      | 1070.9895        | 2139.9876      | 1070.4975        | N    | 857.3974  | 429.2024        | 840.3709       | 420.6891         |                |                  | 6  |
| 20 | 2305.0666 | 1153.0369       | 2288.0401      | 1144.5237        | 2287.0560      | 1144.0317        | F    | 742.3705  | 371.6889        | 725.3439       | 363.1756         |                |                  | 5  |
| 21 | 2465.0973 | 1233.0523       | 2448.0707      | 1224.5390        | 2447.0867      | 1224.0470        | C    | 595.3021  | 298.1547        | 578.2755       | 289.6414         |                |                  | 4  |
| 22 | 2578.1813 | 1289.5943       | 2561.1548      | 1281.0810        | 2560.1708      | 1280.5890        | L    | 435.2714  | 218.1394        | 418.2449       | 209.6261         |                |                  | 3  |

|    |           |                  |           |           |           |           |   |                 |          |          |          |  |  |   |
|----|-----------|------------------|-----------|-----------|-----------|-----------|---|-----------------|----------|----------|----------|--|--|---|
| 23 | 2725.2497 | <b>1363.1285</b> | 2708.2232 | 1354.6152 | 2707.2392 | 1354.1232 | F | <b>322.1874</b> | 161.5973 | 305.1608 | 153.0840 |  |  | 2 |
| 24 |           |                  |           |           |           |           | R | 175.1190        | 88.0631  | 158.0924 | 79.5498  |  |  | 1 |

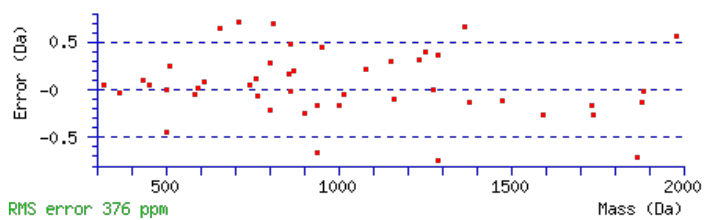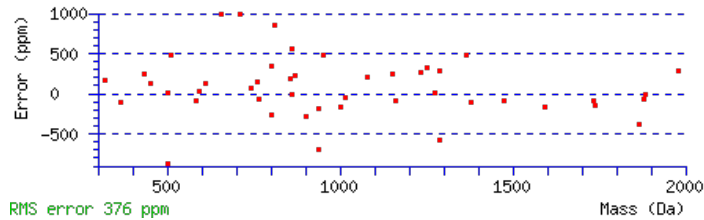

NCBI BLAST search of [ILRQQQHLEFGSNVTDCSGNFCLER](#)

(Parameters: blastp, nr protein database, expect=20000, no filter, PAM30)

Other BLAST [web gateways](#)

All matches to this query

| Score | Mr(calc)  | Delta   | Sequence                                  | Site Analysis              |
|-------|-----------|---------|-------------------------------------------|----------------------------|
| 68.9  | 2898.3541 | -0.0025 | <a href="#">ILRQQQHLEFGSNVTDCSGNFCLER</a> | Deamidated N12, N19 79.83% |
| 55.4  | 2898.3541 | -0.0025 | <a href="#">ILRQQQHLEFGSNVTDCSGNFCLER</a> | Deamidated Q6, N19 3.56%   |
| 55.1  | 2898.3541 | -0.0025 | <a href="#">ILRQQQHLEFGSNVTDCSGNFCLER</a> | Deamidated Q5, N19 3.39%   |
| 55.1  | 2898.3541 | -0.0025 | <a href="#">ILRQQQHLEFGSNVTDCSGNFCLER</a> | Deamidated Q4, N19 3.39%   |
| 54.9  | 2898.3541 | -0.0025 | <a href="#">ILRQQQHLEFGSNVTDCSGNFCLER</a> | Deamidated Q6, N12 3.17%   |
| 54.9  | 2898.3541 | -0.0025 | <a href="#">ILRQQQHLEFGSNVTDCSGNFCLER</a> | Deamidated Q5, N12 3.17%   |
| 54.9  | 2898.3541 | -0.0025 | <a href="#">ILRQQQHLEFGSNVTDCSGNFCLER</a> | Deamidated Q4, N12 3.17%   |
| 40.2  | 2898.3541 | -0.0025 | <a href="#">ILRQQQHLEFGSNVTDCSGNFCLER</a> | Deamidated Q5, Q6 0.11%    |
| 40.2  | 2898.3541 | -0.0025 | <a href="#">ILRQQQHLEFGSNVTDCSGNFCLER</a> | Deamidated Q4, Q6 0.11%    |
| 40.2  | 2898.3541 | -0.0025 | <a href="#">ILRQQQHLEFGSNVTDCSGNFCLER</a> | Deamidated Q4, Q5 0.11%    |

Mascot: <http://www.matrixscience.com/>

# MATRIX SCIENCE Mascot Search Results

## Peptide View

MS/MS Fragmentation of **ILRQQQHLFGSNVTDCSGNFCLFR**

Found in **J3KN47** in **con\_Xuniprot\_HUMAN3**, J3KN47\_HUMAN Serotransferrin OS=Homo sapiens GN=TF PE=2 SV=1

Match to Query 26119: 2897.382852 from(966.801560,3+) intensity(24861.1074) rtinseconds(1747) scans(4576) index(4447)

Title: 111019\_Est\_ISCardio\_NMI\_YP\_G\_7Spectrum3881\_scans\_\_4576

Data file C:\mascot\20140703\_Tmgf\_1D\CSV\_UseAnalysis\MasterCSV\All\_Glyco\mgf\ptm\UC18ERLIC\_PTM\_35D.mgf

Click mouse within plot area to zoom in by factor of two about that point

Or,  to  Da

Label all possible matches  Label matches used for scoring

Show Y-axis

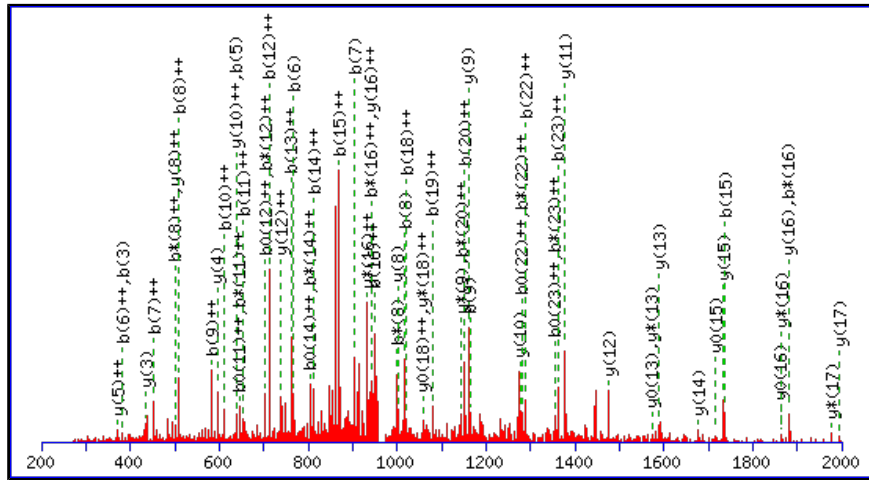

Monoisotopic mass of neutral peptide  $M_r(\text{calc})$ : 2897.3701

Fixed modifications: Carbamidomethyl (C) (apply to specified residues or termini only)

Variable modifications:

N19 : Deamidated (NQ)

Ions Score: 66 Expect: 5.8e-005

Matches : 65/238 fragment ions using 123 most intense peaks ([help](#))

| #  | b                | b <sup>++</sup>  | b <sup>*</sup>   | b <sup>*++</sup> | b <sup>0</sup> | b <sup>0++</sup> | Seq. | y                | y <sup>++</sup> | y <sup>*</sup>   | y <sup>*++</sup> | y <sup>0</sup>   | y <sup>0++</sup> | #  |
|----|------------------|------------------|------------------|------------------|----------------|------------------|------|------------------|-----------------|------------------|------------------|------------------|------------------|----|
| 1  | 114.0913         | 57.5493          |                  |                  |                |                  | I    |                  |                 |                  |                  |                  |                  | 24 |
| 2  | 227.1754         | 114.0913         |                  |                  |                |                  | L    | 2785.2933        | 1393.1503       | 2768.2668        | 1384.6370        | 2767.2828        | 1384.1450        | 23 |
| 3  | <b>383.2765</b>  | 192.1419         | 366.2500         | 183.6286         |                |                  | R    | 2672.2093        | 1336.6083       | 2655.1827        | 1328.0950        | 2654.1987        | 1327.6030        | 22 |
| 4  | 511.3351         | 256.1712         | 494.3085         | 247.6579         |                |                  | Q    | 2516.1082        | 1258.5577       | 2499.0816        | 1250.0444        | 2498.0976        | 1249.5524        | 21 |
| 5  | <b>639.3937</b>  | 320.2005         | 622.3671         | 311.6872         |                |                  | Q    | 2388.0496        | 1194.5284       | 2371.0230        | 1186.0152        | 2370.0390        | 1185.5231        | 20 |
| 6  | <b>767.4522</b>  | <b>384.2298</b>  | 750.4257         | 375.7165         |                |                  | Q    | 2259.9910        | 1130.4991       | 2242.9645        | 1121.9859        | 2241.9804        | 1121.4939        | 19 |
| 7  | <b>904.5112</b>  | <b>452.7592</b>  | 887.4846         | 444.2459         |                |                  | H    | 2131.9324        | 1066.4698       | 2114.9059        | <b>1057.9566</b> | 2113.9219        | <b>1057.4646</b> | 18 |
| 8  | <b>1017.5952</b> | <b>509.3013</b>  | <b>1000.5687</b> | <b>500.7880</b>  |                |                  | L    | <b>1994.8735</b> | 997.9404        | <b>1977.8470</b> | 989.4271         | 1976.8629        | 988.9351         | 17 |
| 9  | <b>1164.6636</b> | <b>582.8355</b>  | 1147.6371        | 574.3222         |                |                  | F    | <b>1881.7894</b> | 941.3984        | <b>1864.7629</b> | <b>932.8851</b>  | <b>1863.7789</b> | 932.3931         | 16 |
| 10 | 1221.6851        | <b>611.3462</b>  | 1204.6586        | 602.8329         |                |                  | G    | <b>1734.7210</b> | 867.8642        | 1717.6945        | 859.3509         | <b>1716.7105</b> | 858.8589         | 15 |
| 11 | 1308.7171        | <b>654.8622</b>  | 1291.6906        | <b>646.3489</b>  | 1290.7066      | <b>645.8569</b>  | S    | <b>1677.6996</b> | 839.3534        | 1660.6730        | 830.8401         | 1659.6890        | 830.3481         | 14 |
| 12 | 1422.7601        | <b>711.8837</b>  | 1405.7335        | <b>703.3704</b>  | 1404.7495      | <b>702.8784</b>  | N    | <b>1590.6675</b> | 795.8374        | <b>1573.6410</b> | 787.3241         | <b>1572.6570</b> | 786.8321         | 13 |
| 13 | 1521.8285        | <b>761.4179</b>  | 1504.8019        | 752.9046         | 1503.8179      | 752.4126         | V    | <b>1476.6246</b> | <b>738.8159</b> | 1459.5981        | 730.3027         | 1458.6140        | 729.8107         | 12 |
| 14 | 1622.8762        | <b>811.9417</b>  | 1605.8496        | <b>803.4284</b>  | 1604.8656      | <b>802.9364</b>  | T    | <b>1377.5562</b> | 689.2817        | 1360.5296        | 680.7685         | 1359.5456        | 680.2765         | 11 |
| 15 | <b>1737.9031</b> | <b>869.4552</b>  | 1720.8765        | 860.9419         | 1719.8925      | 860.4499         | D    | <b>1276.5085</b> | <b>638.7579</b> | 1259.4820        | 630.2446         | 1258.4980        | 629.7526         | 10 |
| 16 | 1897.9337        | <b>949.4705</b>  | <b>1880.9072</b> | <b>940.9572</b>  | 1879.9232      | 940.4652         | C    | <b>1161.4816</b> | 581.2444        | <b>1144.4550</b> | 572.7312         | 1143.4710        | 572.2391         | 9  |
| 17 | 1984.9658        | 992.9865         | 1967.9392        | 984.4732         | 1966.9552      | 983.9812         | S    | <b>1001.4509</b> | <b>501.2291</b> | 984.4244         | 492.7158         | 983.4404         | 492.2238         | 8  |
| 18 | 2041.9872        | <b>1021.4973</b> | 2024.9607        | 1012.9840        | 2023.9767      | 1012.4920        | G    | 914.4189         | 457.7131        | 897.3924         | 449.1998         |                  |                  | 7  |
| 19 | 2157.0142        | <b>1079.0107</b> | 2139.9876        | 1070.4975        | 2139.0036      | 1070.0054        | N    | 857.3974         | 429.2024        | 840.3709         | 420.6891         |                  |                  | 6  |
| 20 | 2304.0826        | <b>1152.5449</b> | 2287.0560        | <b>1144.0317</b> | 2286.0720      | 1143.5397        | F    | 742.3705         | <b>371.6889</b> | 725.3439         | 363.1756         |                  |                  | 5  |
| 21 | 2464.1132        | 1232.5603        | 2447.0867        | 1224.0470        | 2446.1027      | 1223.5550        | C    | <b>595.3021</b>  | 298.1547        | 578.2755         | 289.6414         |                  |                  | 4  |
| 22 | 2577.1973        | <b>1289.1023</b> | 2560.1708        | <b>1280.5890</b> | 2559.1867      | <b>1280.0970</b> | L    | <b>435.2714</b>  | 218.1394        | 418.2449         | 209.6261         |                  |                  | 3  |
| 23 | 2724.2657        | <b>1362.6365</b> | 2707.2392        | <b>1354.1232</b> | 2706.2552      | <b>1353.6312</b> | F    | 322.1874         | 161.5973        | 305.1608         | 153.0840         |                  |                  | 2  |

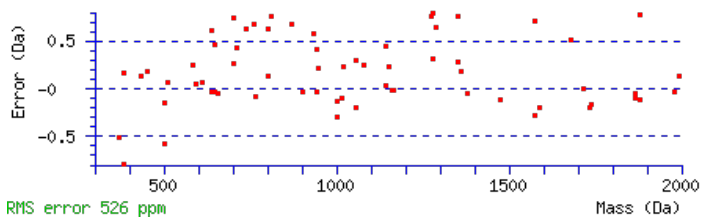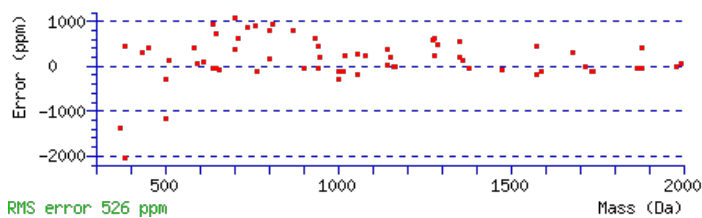

NCBI **BLAST** search of [ILRQQQHLEFGSNVTDCSGNFCLER](#)  
 (Parameters: blastp, nr protein database, expect=20000, no filter, PAM30)  
 Other BLAST [web gateways](#)

**All matches to this query**

| Score | Mr(calc)  | Delta  | Sequence                                       | Site Analysis         |
|-------|-----------|--------|------------------------------------------------|-----------------------|
| 66.4  | 2897.3701 | 0.0127 | <a href="#">ILRQQQHLEFGSNVTDCSGNFCLER</a>      | Deamidated N19 49.58% |
| 66.0  | 2897.3701 | 0.0127 | <a href="#">ILRQQQHLEFGSNVTDCSGNFCLER</a>      | Deamidated N12 45.43% |
| 53.1  | 2897.3701 | 0.0127 | <a href="#">ILRQQQHLEFGSNVTDCSGNFCLER</a>      | Deamidated Q4 2.33%   |
| 52.4  | 2897.3701 | 0.0127 | <a href="#">ILRQQQHLEFGSNVTDCSGNFCLER</a>      | Deamidated Q5 1.96%   |
| 48.9  | 2896.3861 | 0.9967 | <a href="#">ILRQQQHLEFGSNVTDCSGNFCLER</a>      |                       |
| 48.0  | 2897.3701 | 0.0127 | <a href="#">ILRQQQHLEFGSNVTDCSGNFCLER</a>      | Deamidated Q6 0.71%   |
| 8.8   | 2897.3825 | 0.0004 | <a href="#">KIPAVGRELAGAGSDGGGNELPAEATGEAM</a> |                       |
| 8.4   | 2897.3800 | 0.0029 | <a href="#">MNDDATQQLVHRTEVVMNNLSPAWK</a>      |                       |
| 8.4   | 2897.3800 | 0.0029 | <a href="#">MNDDATQQLVHRTEVVMNNLSPAWK</a>      |                       |
| 8.2   | 2896.3697 | 1.0132 | <a href="#">ADIMELVDSSGSIGPENFSKMKTEMK</a>     |                       |

Mascot: <http://www.matrixscience.com/>



# MASCOT SCIENCE Mascot Search Results

## Peptide View

MS/MS Fragmentation of **QQQHFLGNSVNTDCSGNFCLFR**

Found in **J3KN47** in **con\_Xuniprot\_HUMAN3**, J3KN47\_HUMAN Serotransferrin OS=Homo sapiens GN=TF PE=2 SV=1

Match to Query 21799: 2516.091552 from(839.704460,3+) intensity(104068.3750) rtinseconds(1982) scans(5052) index(25487)

Title: 111019\_Est\_MI\_YS\_G\_07Spectrum4314\_scans\_\_5052

Data file C:\mascot\20140703\_Tmgf\_1D\CSV\_UseAnalysis\MasterCSV\All\_Glyco\mgf\ptm\UC18ERLIC\_PTM\_35D.mgf

Click mouse within plot area to zoom in by factor of two about that point

Or, to Da

Label all possible matches Label matches used for scoring

Show Y-axis

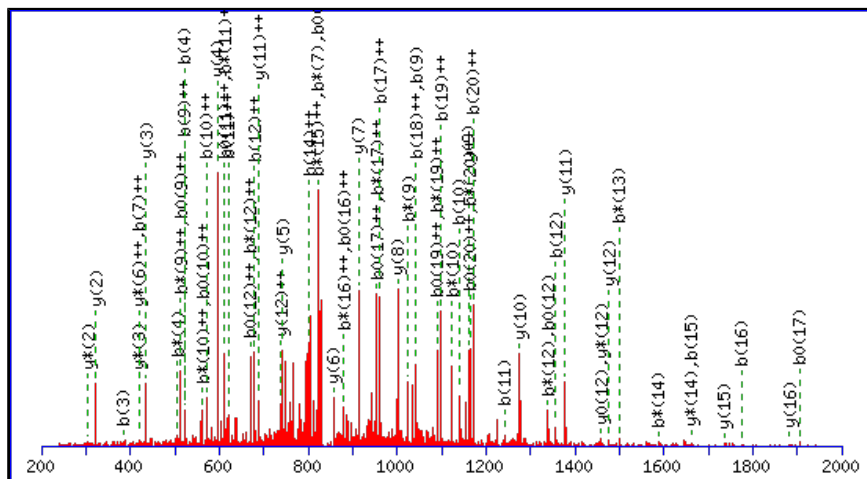

Monoisotopic mass of neutral peptide Mr(calc): 2516.0849

Fixed modifications: Carbamidomethyl (C) (apply to specified residues or termini only)

Variable modifications:

N9 : Deamidated (NQ)

N16 : Deamidated (NQ)

Ions Score: 60 Expect: 7.7e-005

Matches : 66/212 fragment ions using 103 most intense peaks ([help](#))

| #  | b                | b <sup>++</sup>  | b*               | b <sup>*++</sup> | b <sup>0</sup>   | b <sup>0++</sup> | Seq. | y                | y <sup>++</sup> | y*               | y <sup>*++</sup> | y <sup>0</sup>   | y <sup>0++</sup> | #  |
|----|------------------|------------------|------------------|------------------|------------------|------------------|------|------------------|-----------------|------------------|------------------|------------------|------------------|----|
| 1  | 129.0659         | 65.0366          | 112.0393         | 56.5233          |                  |                  | Q    |                  |                 |                  |                  |                  |                  | 21 |
| 2  | 257.1244         | 129.0659         | 240.0979         | 120.5526         |                  |                  | Q    | 2389.0336        | 1195.0204       | 2372.0070        | 1186.5072        | 2371.0230        | 1186.0152        | 20 |
| 3  | <b>385.1830</b>  | 193.0951         | 368.1565         | 184.5819         |                  |                  | Q    | 2260.9750        | 1130.9911       | 2243.9485        | 1122.4779        | 2242.9645        | 1121.9859        | 19 |
| 4  | <b>522.2419</b>  | 261.6246         | <b>505.2154</b>  | 253.1113         |                  |                  | H    | 2132.9164        | 1066.9619       | 2115.8899        | 1058.4486        | 2114.9059        | 1057.9566        | 18 |
| 5  | 635.3260         | 318.1666         | 618.2994         | 309.6534         |                  |                  | L    | 1995.8575        | 998.4324        | 1978.8310        | 989.9191         | 1977.8470        | 989.4271         | 17 |
| 6  | 782.3944         | 391.7008         | 765.3679         | 383.1876         |                  |                  | F    | <b>1882.7735</b> | 941.8904        | 1865.7469        | 933.3771         | 1864.7629        | 932.8851         | 16 |
| 7  | 839.4159         | <b>420.2116</b>  | <b>822.3893</b>  | 411.6983         |                  |                  | G    | <b>1735.7050</b> | 868.3562        | 1718.6785        | 859.8429         | 1717.6945        | 859.3509         | 15 |
| 8  | 926.4479         | 463.7276         | 909.4213         | 455.2143         | 908.4373         | 454.7223         | S    | 1678.6836        | 839.8454        | <b>1661.6570</b> | 831.3322         | 1660.6730        | 830.8401         | 14 |
| 9  | <b>1041.4748</b> | <b>521.2411</b>  | <b>1024.4483</b> | <b>512.7278</b>  | 1023.4643        | <b>512.2358</b>  | N    | 1591.6516        | 796.3294        | 1574.6250        | 787.8161         | 1573.6410        | 787.3241         | 13 |
| 10 | <b>1140.5432</b> | <b>570.7753</b>  | <b>1123.5167</b> | <b>562.2620</b>  | 1122.5327        | <b>561.7700</b>  | V    | <b>1476.6246</b> | <b>738.8159</b> | <b>1459.5981</b> | 730.3027         | <b>1458.6140</b> | 729.8107         | 12 |
| 11 | <b>1241.5909</b> | <b>621.2991</b>  | 1224.5644        | <b>612.7858</b>  | 1223.5804        | <b>612.2938</b>  | T    | <b>1377.5562</b> | <b>689.2817</b> | 1360.5297        | 680.7685         | 1359.5456        | 680.2765         | 11 |
| 12 | <b>1356.6179</b> | <b>678.8126</b>  | <b>1339.5913</b> | <b>670.2993</b>  | <b>1338.6073</b> | <b>669.8073</b>  | D    | <b>1276.5085</b> | 638.7579        | 1259.4820        | 630.2446         | 1258.4980        | 629.7526         | 10 |
| 13 | 1516.6485        | 758.8279         | <b>1499.6220</b> | 750.3146         | 1498.6380        | 749.8226         | C    | <b>1161.4816</b> | 581.2444        | 1144.4550        | 572.7312         | 1143.4710        | 572.2391         | 9  |
| 14 | 1603.6805        | <b>802.3439</b>  | <b>1586.6540</b> | 793.8306         | 1585.6700        | 793.3386         | S    | <b>1001.4509</b> | 501.2291        | 984.4244         | 492.7158         | 983.4404         | 492.2238         | 8  |
| 15 | <b>1660.7020</b> | 830.8546         | 1643.6755        | <b>822.3414</b>  | 1642.6914        | <b>821.8494</b>  | G    | <b>914.4189</b>  | 457.7131        | 897.3924         | 449.1998         |                  |                  | 7  |
| 16 | <b>1775.7290</b> | 888.3681         | 1758.7024        | <b>879.8548</b>  | 1757.7184        | <b>879.3628</b>  | N    | <b>857.3974</b>  | 429.2024        | 840.3709         | <b>420.6891</b>  |                  |                  | 6  |
| 17 | 1922.7974        | <b>961.9023</b>  | 1905.7708        | <b>953.3890</b>  | <b>1904.7868</b> | <b>952.8970</b>  | F    | <b>742.3705</b>  | 371.6889        | 725.3439         | 363.1756         |                  |                  | 5  |
| 18 | 2082.8280        | <b>1041.9176</b> | 2065.8015        | 1033.4044        | 2064.8175        | 1032.9124        | C    | <b>595.3021</b>  | 298.1547        | 578.2755         | 289.6414         |                  |                  | 4  |
| 19 | 2195.9121        | <b>1098.4597</b> | 2178.8855        | <b>1089.9464</b> | 2177.9015        | <b>1089.4544</b> | L    | <b>435.2714</b>  | 218.1394        | <b>418.2449</b>  | 209.6261         |                  |                  | 3  |
| 20 | 2342.9805        | <b>1171.9939</b> | 2325.9539        | <b>1163.4806</b> | 2324.9699        | <b>1162.9886</b> | F    | <b>322.1874</b>  | 161.5973        | <b>305.1608</b>  | 153.0840         |                  |                  | 2  |
| 21 |                  |                  |                  |                  |                  |                  | R    | 175.1190         | 88.0631         | 158.0924         | 79.5498          |                  |                  | 1  |

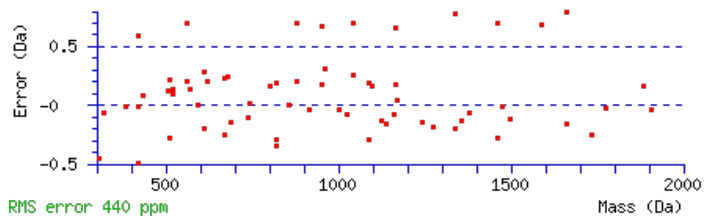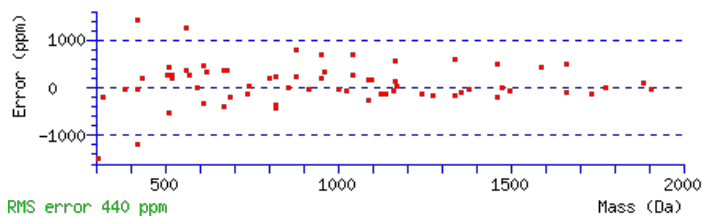

NCBI BLAST search of [QQQHLEFGSNVTDCSGNFCLER](#)

(Parameters: blastp, nr protein database, expect=20000, no filter, PAM30)

Other BLAST [web gateways](#)

All matches to this query

| Score | Mr(calc)  | Delta  | Sequence                               | Site Analysis             |
|-------|-----------|--------|----------------------------------------|---------------------------|
| 60.4  | 2516.0849 | 0.0066 | <a href="#">QQQHLEFGSNVTDCSGNFCLER</a> | Deamidated N9, N16 37.81% |
| 57.8  | 2516.0849 | 0.0066 | <a href="#">QQQHLEFGSNVTDCSGNFCLER</a> | Deamidated Q3, N16 20.64% |
| 57.8  | 2516.0849 | 0.0066 | <a href="#">QQQHLEFGSNVTDCSGNFCLER</a> | Deamidated Q2, N16 20.64% |
| 57.8  | 2516.0849 | 0.0066 | <a href="#">QQQHLEFGSNVTDCSGNFCLER</a> | Deamidated Q1, N16 20.64% |
| 41.3  | 2515.1009 | 0.9906 | <a href="#">QQQHLEFGSNVTDCSGNFCLER</a> |                           |
| 33.9  | 2516.0849 | 0.0066 | <a href="#">QQQHLEFGSNVTDCSGNFCLER</a> | Deamidated Q3, N9 0.08%   |
| 33.9  | 2516.0849 | 0.0066 | <a href="#">QQQHLEFGSNVTDCSGNFCLER</a> | Deamidated Q2, N9 0.08%   |
| 33.9  | 2516.0849 | 0.0066 | <a href="#">QQQHLEFGSNVTDCSGNFCLER</a> | Deamidated Q1, N9 0.08%   |
| 32.5  | 2515.1009 | 0.9906 | <a href="#">QQQHLEFGSNVTDCSGNFCLER</a> |                           |
| 24.8  | 2515.1009 | 0.9906 | <a href="#">QQQHLEFGSNVTDCSGNFCLER</a> |                           |

Mascot: <http://www.matrixscience.com/>

# MATRIX SCIENCE Mascot Search Results

## Peptide View

MS/MS Fragmentation of **QQQHLEGSNVTDGSGNFCLFR**

Found in **J3KN47** in **con\_Xuniprot\_HUMAN3**, J3KN47\_HUMAN Serotransferrin OS=Homo sapiens GN=TF PE=2 SV=1

Match to Query 21632: 2515.107822 from(839.376550,3+) intensity(1010477.7500) rtinseconds(1856) scans(4741) index(24647)

Title: 111019\_Est\_MI\_YS\_G\_06Spectrum4118\_scans\_\_4741

Data file C:\mascot\20140703\_Tmgf\_1D\CSV\_UseAnalysis\MasterCSV\All\_Glyco\mgf\ptm\UC18ERLIC\_PTM\_35D.mgf

Click mouse within plot area to zoom in by factor of two about that point

Or, to Da

Label all possible matches Label matches used for scoring

Show Y-axis

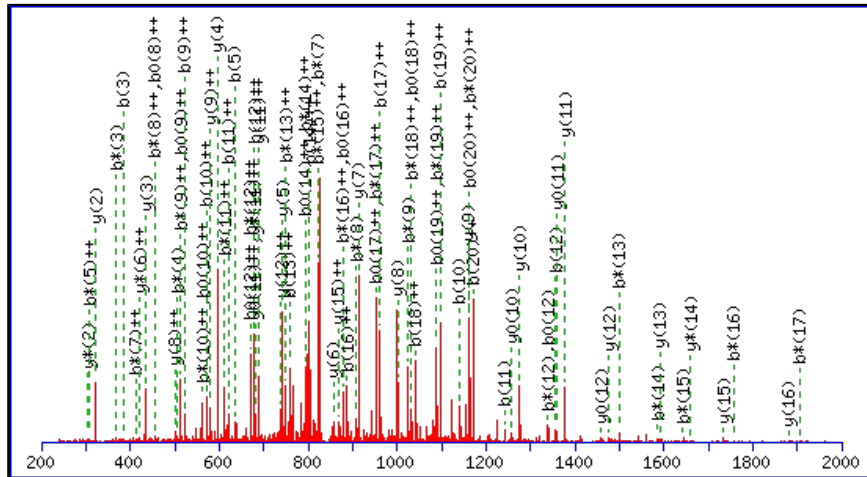

Monoisotopic mass of neutral peptide Mr(calc): 2515.1009

Fixed modifications: Carbamidomethyl (C) (apply to specified residues or termini only)

Variable modifications:

N16 : Deamidated (NQ)

Ions Score: 55 Expect: 0.00036

Matches : 80/212 fragment ions using 154 most intense peaks ([help](#))

| #  | b                | b <sup>++</sup>  | b <sup>*</sup>   | b <sup>*++</sup> | b <sup>0</sup>   | b <sup>0++</sup> | Seq. | y                | y <sup>++</sup> | y <sup>*</sup>   | y <sup>*++</sup> | y <sup>0</sup>   | y <sup>0++</sup> | #  |
|----|------------------|------------------|------------------|------------------|------------------|------------------|------|------------------|-----------------|------------------|------------------|------------------|------------------|----|
| 1  | 129.0659         | 65.0366          | 112.0393         | 56.5233          |                  |                  | Q    |                  |                 |                  |                  |                  |                  | 21 |
| 2  | 257.1244         | 129.0659         | 240.0979         | 120.5526         |                  |                  | Q    | 2388.0496        | 1194.5284       | 2371.0230        | 1186.0152        | 2370.0390        | 1185.5231        | 20 |
| 3  | <b>385.1830</b>  | 193.0951         | <b>368.1565</b>  | 184.5819         |                  |                  | Q    | 2259.9910        | 1130.4991       | 2242.9645        | 1121.9859        | 2241.9804        | 1121.4939        | 19 |
| 4  | 522.2419         | 261.6246         | <b>505.2154</b>  | 253.1113         |                  |                  | H    | 2131.9324        | 1066.4698       | 2114.9059        | 1057.9566        | 2113.9219        | 1057.4646        | 18 |
| 5  | <b>635.3260</b>  | 318.1666         | 618.2994         | <b>309.6534</b>  |                  |                  | L    | 1994.8735        | 997.9404        | 1977.8470        | 989.4271         | 1976.8629        | 988.9351         | 17 |
| 6  | 782.3944         | 391.7008         | 765.3679         | 383.1876         |                  |                  | F    | <b>1881.7894</b> | 941.3984        | 1864.7629        | 932.8851         | 1863.7789        | 932.3931         | 16 |
| 7  | 839.4159         | 420.2116         | <b>822.3893</b>  | <b>411.6983</b>  |                  |                  | G    | <b>1734.7210</b> | <b>867.8642</b> | 1717.6945        | 859.3509         | 1716.7105        | 858.8589         | 15 |
| 8  | 926.4479         | 463.7276         | <b>909.4213</b>  | <b>455.2143</b>  | 908.4373         | <b>454.7223</b>  | S    | 1677.6996        | 839.3534        | <b>1660.6730</b> | 830.8401         | 1659.6890        | 830.3481         | 14 |
| 9  | 1040.4908        | <b>520.7490</b>  | <b>1023.4643</b> | <b>512.2358</b>  | 1022.4803        | <b>511.7438</b>  | N    | <b>1590.6675</b> | 795.8374        | 1573.6410        | 787.3241         | 1572.6570        | 786.8321         | 13 |
| 10 | <b>1139.5592</b> | <b>570.2833</b>  | 1122.5327        | <b>561.7700</b>  | 1121.5487        | <b>561.2780</b>  | V    | <b>1476.6246</b> | <b>738.8159</b> | 1459.5981        | 730.3027         | <b>1458.6140</b> | 729.8107         | 12 |
| 11 | <b>1240.6069</b> | <b>620.8071</b>  | 1223.5804        | <b>612.2938</b>  | 1222.5963        | 611.8018         | T    | <b>1377.5562</b> | <b>689.2817</b> | 1360.5297        | <b>680.7685</b>  | <b>1359.5456</b> | <b>680.2765</b>  | 11 |
| 12 | <b>1355.6339</b> | <b>678.3206</b>  | 1338.6073        | <b>669.8073</b>  | <b>1337.6233</b> | <b>669.3153</b>  | D    | <b>1276.5085</b> | 638.7579        | 1259.4820        | 630.2446         | <b>1258.4980</b> | 629.7526         | 10 |
| 13 | 1515.6645        | <b>758.3359</b>  | 1498.6380        | <b>749.8226</b>  | 1497.6539        | 749.3306         | C    | <b>1161.4816</b> | <b>581.2444</b> | 1144.4550        | 572.7312         | 1143.4710        | 572.2391         | 9  |
| 14 | 1602.6965        | <b>801.8519</b>  | 1585.6700        | <b>793.3386</b>  | 1584.6860        | <b>792.8466</b>  | S    | <b>1001.4509</b> | <b>501.2291</b> | 984.4244         | 492.7158         | 983.4404         | 492.2238         | 8  |
| 15 | 1659.7180        | 830.3626         | 1642.6914        | <b>821.8494</b>  | 1641.7074        | 821.3574         | G    | <b>914.4189</b>  | 457.7131        | 897.3924         | 449.1998         |                  |                  | 7  |
| 16 | 1774.7449        | <b>887.8761</b>  | <b>1757.7184</b> | <b>879.3628</b>  | 1756.7344        | <b>878.8708</b>  | N    | <b>857.3974</b>  | 429.2024        | 840.3709         | <b>420.6891</b>  |                  |                  | 6  |
| 17 | 1921.8134        | <b>961.4103</b>  | 1904.7868        | <b>952.8970</b>  | 1903.8028        | <b>952.4050</b>  | F    | <b>742.3705</b>  | 371.6889        | 725.3439         | 363.1756         |                  |                  | 5  |
| 18 | 2081.8440        | <b>1041.4256</b> | 2064.8175        | <b>1032.9124</b> | 2063.8334        | <b>1032.4204</b> | C    | <b>595.3021</b>  | 298.1547        | 578.2755         | 289.6414         |                  |                  | 4  |
| 19 | 2194.9281        | <b>1097.9677</b> | 2177.9015        | <b>1089.4544</b> | 2176.9175        | <b>1088.9624</b> | L    | <b>435.2714</b>  | 218.1394        | 418.2449         | 209.6261         |                  |                  | 3  |
| 20 | 2341.9965        | <b>1171.5019</b> | 2324.9699        | <b>1162.9886</b> | 2323.9859        | <b>1162.4966</b> | F    | <b>322.1874</b>  | 161.5973        | <b>305.1608</b>  | 153.0840         |                  |                  | 2  |
| 21 |                  |                  |                  |                  |                  |                  | R    | 175.1190         | 88.0631         | 158.0924         | 79.5498          |                  |                  | 1  |

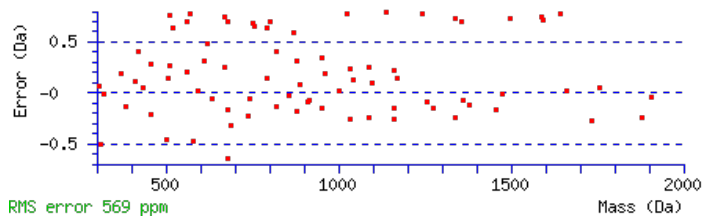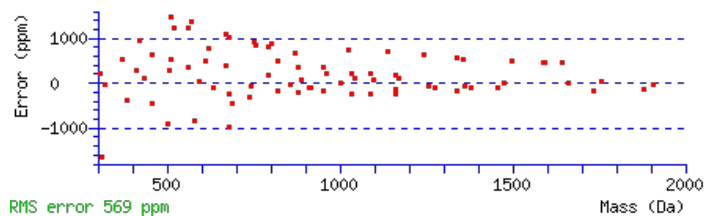

NCBI BLAST search of [QQQHLEFGSNVTDCSGNFCLER](#)

(Parameters: blastp, nr protein database, expect=20000, no filter, PAM30)

Other BLAST [web gateways](#)

All matches to this query

| Score | Mr(calc)  | Delta  | Sequence                               | Site Analysis         |
|-------|-----------|--------|----------------------------------------|-----------------------|
| 55.0  | 2515.1009 | 0.0069 | <a href="#">QQQHLEFGSNVTDCSGNFCLER</a> | Deamidated N16 63.49% |
| 50.8  | 2515.1009 | 0.0069 | <a href="#">QQQHLEFGSNVTDCSGNFCLER</a> | Deamidated N9 23.70%  |
| 43.3  | 2515.1009 | 0.0069 | <a href="#">QQQHLEFGSNVTDCSGNFCLER</a> | Deamidated Q3 4.27%   |
| 43.3  | 2515.1009 | 0.0069 | <a href="#">QQQHLEFGSNVTDCSGNFCLER</a> | Deamidated Q2 4.27%   |
| 43.3  | 2515.1009 | 0.0069 | <a href="#">QQQHLEFGSNVTDCSGNFCLER</a> | Deamidated Q1 4.27%   |
| 34.6  | 2514.1169 | 0.9909 | <a href="#">QQQHLEFGSNVTDCSGNFCLER</a> |                       |
| 2.0   | 2514.0978 | 1.0101 | <a href="#">HCNVVKTMQFEPSTAVYDACR</a>  |                       |
| 0.1   | 2513.0938 | 2.0141 | <a href="#">WATEASAVEQTAESCEVQEMLK</a> |                       |

Mascot: <http://www.matrixscience.com/>

# MASCOT SCIENCE Mascot Search Results

## Peptide View

MS/MS Fragmentation of **CGLVPVLAENYNK**

Found in **J3KN47** in **con\_Xuniprot\_HUMAN3**, J3KN47\_HUMAN Serotransferrin OS=Homo sapiens GN=TF PE=2 SV=1

Match to Query 6672: 1476.730868 from(739.372710,2+) intensity(478122.6875) rtinseconds(1447) scans(3566) index(5214)

Title: 111019\_Est\_ISCardio\_NMI\_YP\_G\_8Spectrum3111\_scans\_\_3566

Data file C:\\mascot\\20140703\_Tmgf\_1D\\CSV\_UseAnalysis\\MasterCSV\\All\_Glyco\\mgf\\ptm\\UC18ERLIC\_PTM\_35D.mgf

Click mouse within plot area to zoom in by factor of two about that point

Or, to Da

Label all possible matches      Label matches used for scoring

Show Y-axis

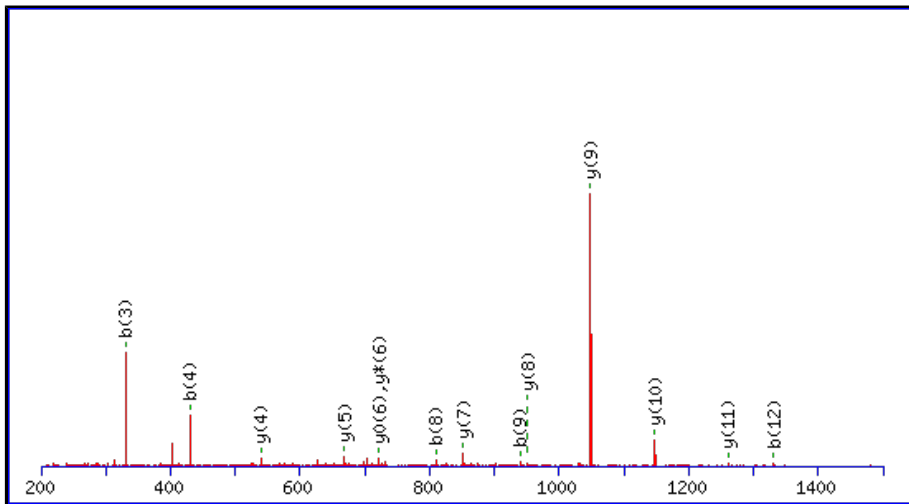

Monoisotopic mass of neutral peptide Mr(calc): 1476.7282

Fixed modifications: Carbamidomethyl (C) (apply to specified residues or termini only)

Variable modifications:

N12 : Deamidated (NQ)

Ions Score: 45      Expect: 0.0074

Matches : 14/102 fragment ions using 24 most intense peaks      ([help](#))

| #  | b                | b <sup>++</sup> | b*        | b <sup>+++</sup> | b <sup>0</sup> | b <sup>0++</sup> | Seq. | y                | y <sup>++</sup> | y*              | y <sup>+++</sup> | y <sup>0</sup>  | y <sup>0++</sup> | #  |
|----|------------------|-----------------|-----------|------------------|----------------|------------------|------|------------------|-----------------|-----------------|------------------|-----------------|------------------|----|
| 1  | 161.0379         | 81.0226         |           |                  |                |                  | C    |                  |                 |                 |                  |                 |                  | 13 |
| 2  | 218.0594         | 109.5333        |           |                  |                |                  | G    | 1317.7049        | 659.3561        | 1300.6783       | 650.8428         | 1299.6943       | 650.3508         | 12 |
| 3  | <b>331.1435</b>  | 166.0754        |           |                  |                |                  | L    | <b>1260.6834</b> | 630.8454        | 1243.6569       | 622.3321         | 1242.6729       | 621.8401         | 11 |
| 4  | <b>430.2119</b>  | 215.6096        |           |                  |                |                  | V    | <b>1147.5994</b> | 574.3033        | 1130.5728       | 565.7900         | 1129.5888       | 565.2980         | 10 |
| 5  | 527.2646         | 264.1360        |           |                  |                |                  | P    | <b>1048.5310</b> | 524.7691        | 1031.5044       | 516.2558         | 1030.5204       | 515.7638         | 9  |
| 6  | 626.3330         | 313.6702        |           |                  |                |                  | V    | <b>951.4782</b>  | 476.2427        | 934.4516        | 467.7295         | 933.4676        | 467.2374         | 8  |
| 7  | 739.4171         | 370.2122        |           |                  |                |                  | L    | <b>852.4098</b>  | 426.7085        | 835.3832        | 418.1953         | 834.3992        | 417.7032         | 7  |
| 8  | <b>810.4542</b>  | 405.7307        |           |                  |                |                  | A    | 739.3257         | 370.1665        | <b>722.2992</b> | 361.6532         | <b>721.3151</b> | 361.1612         | 6  |
| 9  | <b>939.4968</b>  | 470.2520        |           |                  | 921.4863       | 461.2468         | E    | <b>668.2886</b>  | 334.6479        | 651.2620        | 326.1347         | 650.2780        | 325.6427         | 5  |
| 10 | 1053.5397        | 527.2735        | 1036.5132 | 518.7602         | 1035.5292      | 518.2682         | N    | <b>539.2460</b>  | 270.1266        | 522.2195        | 261.6134         |                 |                  | 4  |
| 11 | 1216.6031        | 608.8052        | 1199.5765 | 600.2919         | 1198.5925      | 599.7999         | Y    | 425.2031         | 213.1052        | 408.1765        | 204.5919         |                 |                  | 3  |
| 12 | <b>1331.6300</b> | 666.3186        | 1314.6035 | 657.8054         | 1313.6195      | 657.3134         | N    | 262.1397         | 131.5735        | 245.1132        | 123.0602         |                 |                  | 2  |
| 13 |                  |                 |           |                  |                |                  | K    | 147.1128         | 74.0600         | 130.0863        | 65.5468          |                 |                  | 1  |

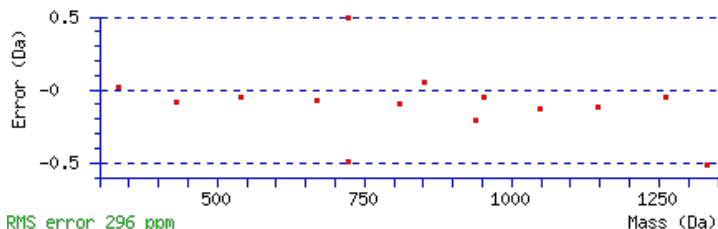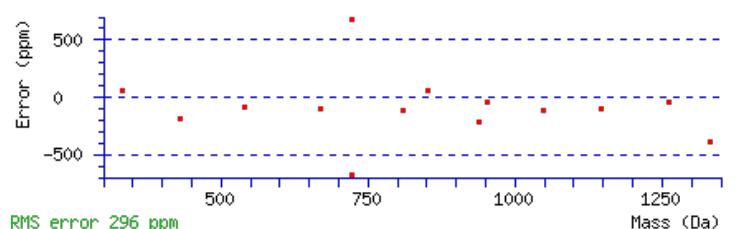

NCBI **BLAST** search of [CGLVPVLAENYNK](#)

(Parameters: blastp, nr protein database, expect=20000, no filter, PAM30)

Other BLAST [web gateways](#)

**All matches to this query**

| Score | Mr(calc)  | Delta   | Sequence                       | Site Analysis         |
|-------|-----------|---------|--------------------------------|-----------------------|
| 44.9  | 1476.7282 | 0.0026  | <a href="#">CGLVPVLAENYNK</a>  | Deamidated N12 50.00% |
| 44.9  | 1476.7282 | 0.0026  | <a href="#">CGLVPVLAENYNK</a>  | Deamidated N10 50.00% |
| 7.7   | 1476.7242 | 0.0067  | <a href="#">LMNATSALESNQAK</a> |                       |
| 7.1   | 1475.7263 | 1.0046  | <a href="#">TNNDRLMRGVR</a>    |                       |
| 5.5   | 1476.7242 | 0.0067  | <a href="#">SGQGAQLRAMIEAK</a> |                       |
| 5.2   | 1476.7361 | -0.0052 | <a href="#">TAQEFGFAEPPRK</a>  |                       |
| 4.9   | 1475.7256 | 1.0053  | <a href="#">ERAPYQADLVQGK</a>  |                       |
| 4.3   | 1476.7316 | -0.0007 | <a href="#">AKEEMMQGIQIAK</a>  |                       |
| 4.3   | 1476.7316 | -0.0007 | <a href="#">AKEEMMQGIQIAK</a>  |                       |
| 3.5   | 1476.7242 | 0.0067  | <a href="#">QSNDKSPMLKVGR</a>  |                       |

**Mascot:** <http://www.matrixscience.com/>

# MATRIX SCIENCE Mascot Search Results

## Peptide View

MS/MS Fragmentation of **QQQHFLGFSNVTDCSGNFCLFR**

Found in **J3KN47** in **con\_Xuniprot\_HUMAN3**, J3KN47\_HUMAN Serotransferrin OS=Homo sapiens GN=TF PE=2 SV=1

Match to Query 21796: 2516.090112 from(839.703980,3+) intensity(51950.7305) rtinseconds(1872) scans(4731) index(5394)

Title: 111019\_Est\_ISCardio\_NMI\_YP\_G\_8Spectrum4147\_scans\_\_4731

Data file C:\mascot\20140703\_Tmgf\_1D\CSV\_UseAnalysis\MasterCSV\All\_Glyco\mgf\ptm\UC18ERLIC\_PTM\_35D.mgf

Click mouse within plot area to zoom in by factor of two about that point

Or, to Da

Label all possible matches Label matches used for scoring

Show Y-axis

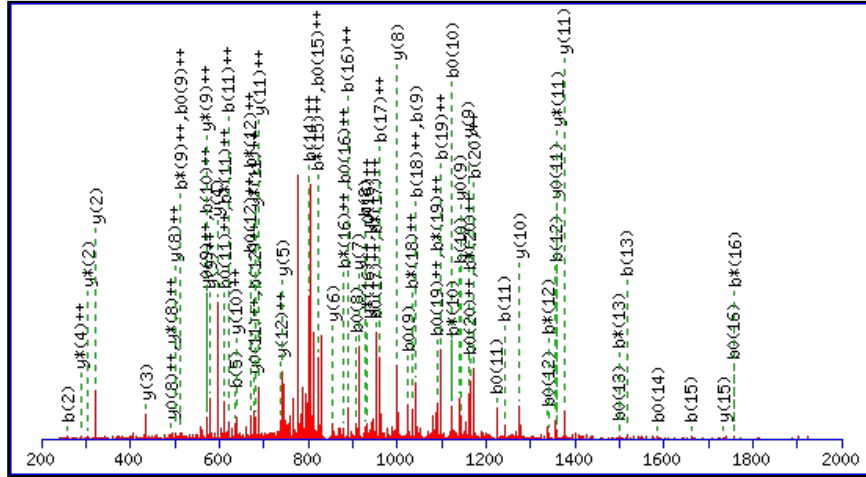

Monoisotopic mass of neutral peptide Mr(calc): 2516.0849

Fixed modifications: Carbamidomethyl (C) (apply to specified residues or termini only)

Variable modifications:

Q2 : Deamidated (NQ)

N9 : Deamidated (NQ)

Ions Score: 43 Expect: 0.0045

Matches : 76/212 fragment ions using 144 most intense peaks ([help](#))

| #  | b                | b <sup>++</sup>  | b*               | b <sup>*++</sup> | b <sup>0</sup>   | b <sup>0++</sup> | Seq. | y                | y <sup>++</sup> | y*               | y <sup>*++</sup> | y <sup>0</sup>   | y <sup>0++</sup> | #  |
|----|------------------|------------------|------------------|------------------|------------------|------------------|------|------------------|-----------------|------------------|------------------|------------------|------------------|----|
| 1  | 129.0659         | 65.0366          | 112.0393         | 56.5233          |                  |                  | Q    |                  |                 |                  |                  |                  |                  | 21 |
| 2  | <b>258.1084</b>  | 129.5579         | 241.0819         | 121.0446         |                  |                  | Q    | 2389.0336        | 1195.0204       | 2372.0070        | 1186.5072        | 2371.0230        | 1186.0152        | 20 |
| 3  | 386.1670         | 193.5872         | 369.1405         | 185.0739         |                  |                  | Q    | 2259.9910        | 1130.4991       | 2242.9645        | 1121.9859        | 2241.9804        | 1121.4939        | 19 |
| 4  | 523.2259         | 262.1166         | 506.1994         | 253.6033         |                  |                  | H    | 2131.9324        | 1066.4698       | 2114.9059        | 1057.9566        | 2113.9219        | 1057.4646        | 18 |
| 5  | <b>636.3100</b>  | 318.6586         | 619.2835         | 310.1454         |                  |                  | L    | 1994.8735        | 997.9404        | 1977.8470        | 989.4271         | 1976.8629        | 988.9351         | 17 |
| 6  | 783.3784         | 392.1928         | 766.3519         | 383.6796         |                  |                  | F    | 1881.7894        | 941.3984        | 1864.7629        | <b>932.8851</b>  | 1863.7789        | <b>932.3931</b>  | 16 |
| 7  | 840.3999         | 420.7036         | 823.3733         | 412.1903         |                  |                  | G    | <b>1734.7210</b> | 867.8642        | 1717.6945        | 859.3509         | 1716.7105        | 858.8589         | 15 |
| 8  | <b>927.4319</b>  | 464.2196         | 910.4054         | 455.7063         | <b>909.4213</b>  | 455.2143         | S    | 1677.6996        | 839.3534        | 1660.6730        | 830.8401         | 1659.6890        | 830.3481         | 14 |
| 9  | <b>1042.4589</b> | 521.7331         | 1025.4323        | <b>513.2198</b>  | <b>1024.4483</b> | <b>512.7278</b>  | N    | 1590.6675        | 795.8374        | 1573.6410        | 787.3241         | 1572.6570        | 786.8321         | 13 |
| 10 | <b>1141.5273</b> | <b>571.2673</b>  | <b>1124.5007</b> | 562.7540         | <b>1123.5167</b> | 562.2620         | V    | 1475.6406        | <b>738.3239</b> | 1458.6140        | 729.8107         | 1457.6300        | 729.3187         | 12 |
| 11 | <b>1242.5749</b> | <b>621.7911</b>  | 1225.5484        | 613.2778         | <b>1224.5644</b> | <b>612.7858</b>  | T    | <b>1376.5722</b> | <b>688.7897</b> | <b>1359.5456</b> | <b>680.2765</b>  | <b>1358.5616</b> | <b>679.7844</b>  | 11 |
| 12 | <b>1357.6019</b> | <b>679.3046</b>  | <b>1340.5753</b> | <b>670.7913</b>  | <b>1339.5913</b> | <b>670.2993</b>  | D    | <b>1275.5245</b> | <b>638.2659</b> | 1258.4980        | 629.7526         | 1257.5139        | 629.2606         | 10 |
| 13 | <b>1517.6325</b> | 759.3199         | <b>1500.6060</b> | 750.8066         | <b>1499.6220</b> | 750.3146         | C    | <b>1160.4976</b> | <b>580.7524</b> | 1143.4710        | <b>572.2391</b>  | <b>1142.4870</b> | <b>571.7471</b>  | 9  |
| 14 | 1604.6646        | <b>802.8359</b>  | 1587.6380        | 794.3226         | <b>1586.6540</b> | 793.8306         | S    | <b>1000.4669</b> | <b>500.7371</b> | 983.4404         | <b>492.2238</b>  | 982.4563         | <b>491.7318</b>  | 8  |
| 15 | <b>1661.6860</b> | 831.3467         | 1644.6595        | <b>822.8334</b>  | 1643.6755        | <b>822.3414</b>  | G    | <b>913.4349</b>  | 457.2211        | 896.4083         | 448.7078         |                  |                  | 7  |
| 16 | 1775.7290        | <b>888.3681</b>  | <b>1758.7024</b> | <b>879.8548</b>  | <b>1757.7184</b> | <b>879.3628</b>  | N    | <b>856.4134</b>  | 428.7103        | 839.3869         | 420.1971         |                  |                  | 6  |
| 17 | 1922.7974        | <b>961.9023</b>  | 1905.7708        | <b>953.3890</b>  | 1904.7868        | <b>952.8970</b>  | F    | <b>742.3705</b>  | 371.6889        | 725.3439         | 363.1756         |                  |                  | 5  |
| 18 | 2082.8280        | <b>1041.9176</b> | 2065.8015        | <b>1033.4044</b> | 2064.8175        | 1032.9124        | C    | <b>595.3021</b>  | 298.1547        | 578.2755         | <b>289.6414</b>  |                  |                  | 4  |
| 19 | 2195.9121        | <b>1098.4597</b> | 2178.8855        | <b>1089.9464</b> | 2177.9015        | <b>1089.4544</b> | L    | <b>435.2714</b>  | 218.1394        | 418.2449         | 209.6261         |                  |                  | 3  |
| 20 | 2342.9805        | <b>1171.9939</b> | 2325.9539        | <b>1163.4806</b> | 2324.9699        | <b>1162.9886</b> | F    | <b>322.1874</b>  | 161.5973        | <b>305.1608</b>  | 153.0840         |                  |                  | 2  |
| 21 |                  |                  |                  |                  |                  |                  | R    | 175.1190         | 88.0631         | 158.0924         | 79.5498          |                  |                  | 1  |



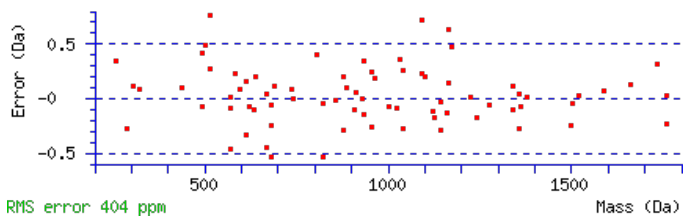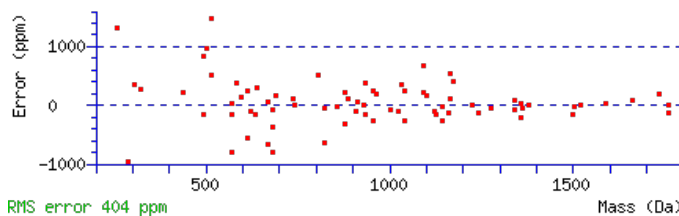

NCBI BLAST search of [QQQHLEFGSNVTDCSGNFCLER](#)

(Parameters: blastp, nr protein database, expect=20000, no filter, PAM30)

Other BLAST [web gateways](#)

**All matches to this query**

| Score | Mr(calc)  | Delta  | Sequence                               | Site Analysis            |
|-------|-----------|--------|----------------------------------------|--------------------------|
| 42.8  | 2516.0849 | 0.0052 | <a href="#">QQQHLEFGSNVTDCSGNFCLER</a> | Deamidated Q2, N9 30.24% |
| 42.8  | 2516.0849 | 0.0052 | <a href="#">QQQHLEFGSNVTDCSGNFCLER</a> | Deamidated Q1, N9 30.24% |
| 38.5  | 2516.0849 | 0.0052 | <a href="#">QQQHLEFGSNVTDCSGNFCLER</a> | Deamidated Q3, N9 11.47% |
| 37.3  | 2516.0849 | 0.0052 | <a href="#">QQQHLEFGSNVTDCSGNFCLER</a> | Deamidated Q2, Q3 8.60%  |
| 37.3  | 2516.0849 | 0.0052 | <a href="#">QQQHLEFGSNVTDCSGNFCLER</a> | Deamidated Q1, Q3 8.60%  |
| 37.3  | 2516.0849 | 0.0052 | <a href="#">QQQHLEFGSNVTDCSGNFCLER</a> | Deamidated Q1, Q2 8.60%  |
| 28.1  | 2516.0849 | 0.0052 | <a href="#">QQQHLEFGSNVTDCSGNFCLER</a> | Deamidated Q2, N16 1.03% |
| 28.1  | 2516.0849 | 0.0052 | <a href="#">QQQHLEFGSNVTDCSGNFCLER</a> | Deamidated Q1, N16 1.03% |
| 20.0  | 2516.0849 | 0.0052 | <a href="#">QQQHLEFGSNVTDCSGNFCLER</a> | Deamidated Q3, N16 0.16% |
| 12.1  | 2516.0849 | 0.0052 | <a href="#">QQQHLEFGSNVTDCSGNFCLER</a> | Deamidated N9, N16 0.03% |

Mascot: <http://www.matrixscience.com/>

# MATRIX SCIENCE Mascot Search Results

## Peptide View

MS/MS Fragmentation of **LCMGSGGLNLCEPNNK**

Found in **H7C5E8** in **con\_Xuniprot\_HUMAN3**, H7C5E8\_HUMAN Serotransferrin (Fragment) OS=Homo sapiens GN=TF PE=4 SV=1

Match to Query 8708: 1707.744188 from(854.879370,2+) intensity(43030.5859) rtinseconds(1261) scans(2810) index(22228)

Title: 111019\_Est\_MI\_YS\_G\_02Spectrum2373\_scans\_\_2810

Data file C:\\mascot\\20140703\_Tmgf\_1D\\CSV\_UseAnalysis\\MasterCSV\\All\_Glyco\\mgf\\ptm\\UC18ERLIC\_PTM\_35D.mgf

Click mouse within plot area to zoom in by factor of two about that point

Or, to Da

Label all possible matches Label matches used for scoring

Show Y-axis

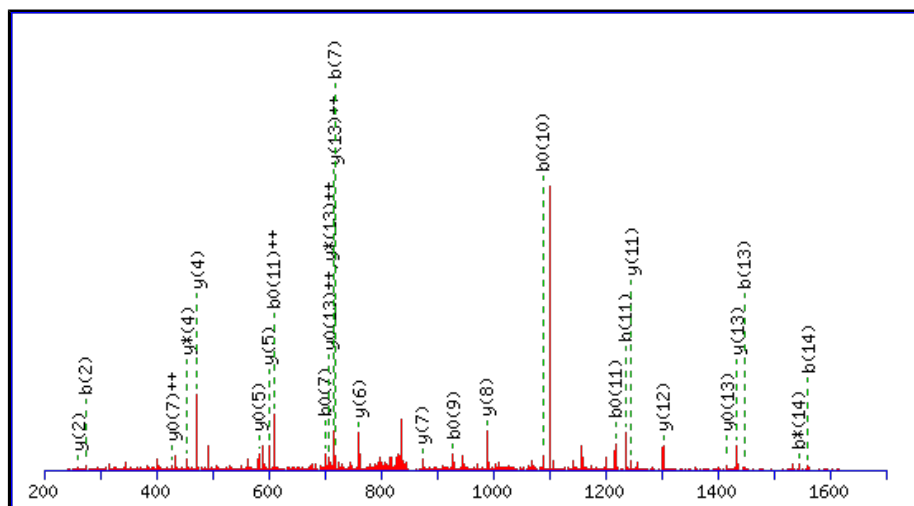

Monoisotopic mass of neutral peptide Mr(calc): 1706.7426

Fixed modifications: Carbamidomethyl (C) (apply to specified residues or termini only)

Variable modifications:

N8 : Deamidated (NQ)

Ions Score: 41 Expect: 0.0066

Matches : 27/138 fragment ions using 56 most intense peaks ([help](#))

| #  | b                | b <sup>++</sup> | b <sup>*</sup>   | b <sup>*++</sup> | b <sup>0</sup>   | b <sup>0++</sup> | Seq. | y                | y <sup>++</sup> | y <sup>*</sup>  | y <sup>*++</sup> | y <sup>0</sup>   | y <sup>0++</sup> | #  |
|----|------------------|-----------------|------------------|------------------|------------------|------------------|------|------------------|-----------------|-----------------|------------------|------------------|------------------|----|
| 1  | 114.0913         | 57.5493         |                  |                  |                  |                  | L    |                  |                 |                 |                  |                  |                  | 15 |
| 2  | <b>274.1220</b>  | 137.5646        |                  |                  |                  |                  | C    | 1594.6658        | 797.8366        | 1577.6393       | 789.3233         | 1576.6553        | 788.8313         | 14 |
| 3  | 405.1625         | 203.0849        |                  |                  |                  |                  | M    | <b>1434.6352</b> | <b>717.8212</b> | 1417.6086       | <b>709.3080</b>  | <b>1416.6246</b> | <b>708.8159</b>  | 13 |
| 4  | 462.1839         | 231.5956        |                  |                  |                  |                  | G    | <b>1303.5947</b> | 652.3010        | 1286.5681       | 643.7877         | 1285.5841        | 643.2957         | 12 |
| 5  | 549.2160         | 275.1116        |                  |                  | 531.2054         | 266.1063         | S    | <b>1246.5732</b> | 623.7903        | 1229.5467       | 615.2770         | 1228.5627        | 614.7850         | 11 |
| 6  | 606.2374         | 303.6224        |                  |                  | 588.2269         | 294.6171         | G    | 1159.5412        | 580.2742        | 1142.5147       | 571.7610         | 1141.5306        | 571.2690         | 10 |
| 7  | <b>719.3215</b>  | 360.1644        |                  |                  | <b>701.3109</b>  | 351.1591         | L    | 1102.5197        | 551.7635        | 1085.4932       | 543.2502         | 1084.5092        | 542.7582         | 9  |
| 8  | 834.3484         | 417.6779        | 817.3219         | 409.1646         | 816.3379         | 408.6726         | N    | <b>989.4357</b>  | 495.2215        | 972.4091        | 486.7082         | 971.4251         | 486.2162         | 8  |
| 9  | 947.4325         | 474.2199        | 930.4060         | 465.7066         | <b>929.4219</b>  | 465.2146         | L    | <b>874.4087</b>  | 437.7080        | 857.3822        | 429.1947         | 856.3982         | <b>428.7027</b>  | 7  |
| 10 | 1107.4632        | 554.2352        | 1090.4366        | 545.7219         | <b>1089.4526</b> | 545.2299         | C    | <b>761.3247</b>  | 381.1660        | 744.2981        | 372.6527         | 743.3141         | 372.1607         | 6  |
| 11 | <b>1236.5057</b> | 618.7565        | 1219.4792        | 610.2432         | <b>1218.4952</b> | <b>609.7512</b>  | E    | <b>601.2940</b>  | 301.1506        | 584.2675        | 292.6374         | <b>583.2834</b>  | 292.1454         | 5  |
| 12 | 1333.5585        | 667.2829        | 1316.5320        | 658.7696         | 1315.5479        | 658.2776         | P    | <b>472.2514</b>  | 236.6293        | <b>455.2249</b> | 228.1161         |                  |                  | 4  |
| 13 | <b>1447.6014</b> | 724.3044        | 1430.5749        | 715.7911         | 1429.5909        | 715.2991         | N    | 375.1987         | 188.1030        | 358.1721        | 179.5897         |                  |                  | 3  |
| 14 | <b>1561.6444</b> | 781.3258        | <b>1544.6178</b> | 772.8125         | 1543.6338        | 772.3205         | N    | <b>261.1557</b>  | 131.0815        | 244.1292        | 122.5682         |                  |                  | 2  |
| 15 |                  |                 |                  |                  |                  |                  | K    | 147.1128         | 74.0600         | 130.0863        | 65.5468          |                  |                  | 1  |

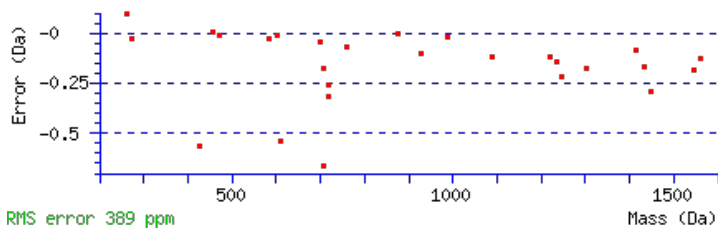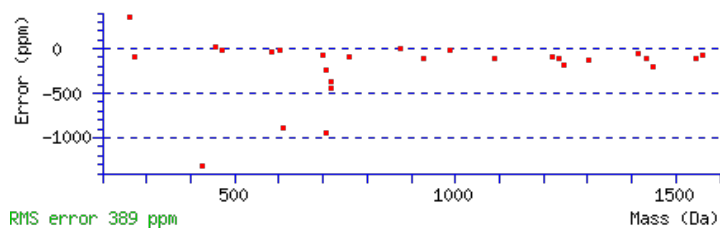

NCBI **BLAST** search of [LCMGSGNLNCEPNNK](#)

(Parameters: blastp, nr protein database, expect=20000, no filter, PAM30)

Other BLAST [web gateways](#)

**All matches to this query**

| Score | Mr(calc)  | Delta   | Sequence                        | Site Analysis        |
|-------|-----------|---------|---------------------------------|----------------------|
| 41.1  | 1706.7426 | 1.0016  | <a href="#">LCMGSGNLNCEPNNK</a> | Deamidated N8 88.37% |
| 30.5  | 1706.7426 | 1.0016  | <a href="#">LCMGSGNLNCEPNNK</a> | Deamidated N13 7.71% |
| 27.6  | 1706.7426 | 1.0016  | <a href="#">LCMGSGNLNCEPNNK</a> | Deamidated N14 3.91% |
| 11.6  | 1706.7343 | 1.0099  | <a href="#">SRNEQEEDEQTSVR</a>  |                      |
| 10.9  | 1706.7343 | 1.0099  | <a href="#">SRNEQEEDEQTSVR</a>  |                      |
| 10.9  | 1706.7393 | 1.0049  | <a href="#">VPEFQPMPTSCAGR</a>  |                      |
| 6.0   | 1707.7410 | 0.0032  | <a href="#">EYCGVPGDGDELLR</a>  |                      |
| 5.9   | 1707.7475 | -0.0033 | <a href="#">QYDIKDNEPNNNK</a>   |                      |
| 5.3   | 1707.7475 | -0.0033 | <a href="#">QYDIKDNEPNNNK</a>   |                      |
| 5.3   | 1707.7370 | 0.0072  | <a href="#">RQNAQSAGEMDEVVR</a> |                      |

Mascot: <http://www.matrixscience.com/>

# MASCOT SCIENCE Mascot Search Results

## Peptide View

MS/MS Fragmentation of **QQQHFLGNSVNTDCSGNFCLFR**

Found in **J3KN47** in **con\_Xuniprot\_HUMAN3**, J3KN47\_HUMAN Serotransferrin OS=Homo sapiens GN=TF PE=2 SV=1

Match to Query 21815: 2517.087668 from(1259.551110,2+) intensity(12182.5811) rtinseconds(1954) scans(4789) index(15257)

Title: 111019\_Est\_MI\_YP\_G\_04Spectrum4114\_scans\_\_4789

Data file C:\mascot\20140703\_Tmgf\_1D\CSV\_UseAnalysis\MasterCSV\All\_Glyco\mgf\ptm\UC18ERLIC\_PTM\_35D.mgf

Click mouse within plot area to zoom in by factor of two about that point

Or, to Da

Label all possible matches Label matches used for scoring

Show Y-axis

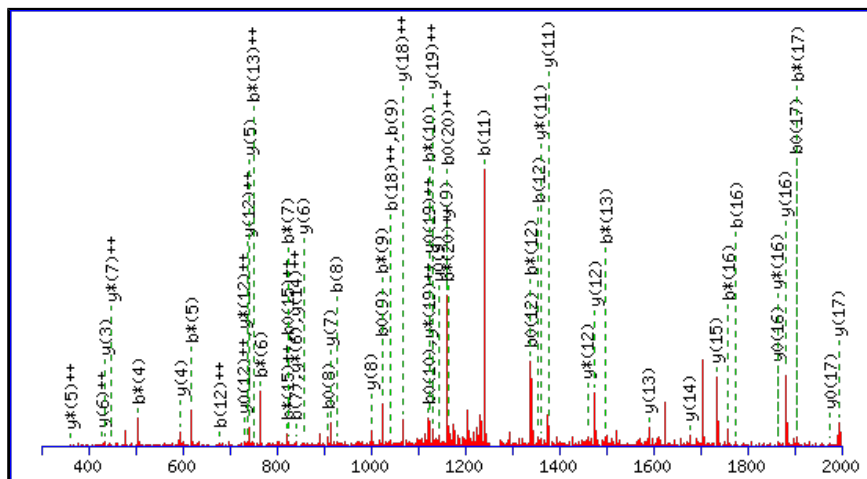

Monoisotopic mass of neutral peptide Mr(calc): 2516.0849

Fixed modifications: Carbamidomethyl (C) (apply to specified residues or termini only)

Variable modifications:

Q3 : Deamidated (NQ)

N16 : Deamidated (NQ)

Ions Score: 37 Expect: 0.016

Matches : 60/212 fragment ions using 170 most intense peaks ([help](#))

| #  | b         | b <sup>++</sup> | b <sup>*</sup> | b <sup>*++</sup> | b <sup>0</sup> | b <sup>0++</sup> | Seq. | y         | y <sup>++</sup> | y <sup>*</sup> | y <sup>*++</sup> | y <sup>0</sup> | y <sup>0++</sup> | #  |
|----|-----------|-----------------|----------------|------------------|----------------|------------------|------|-----------|-----------------|----------------|------------------|----------------|------------------|----|
| 1  | 129.0659  | 65.0366         | 112.0393       | 56.5233          |                |                  | Q    |           |                 |                |                  |                |                  | 21 |
| 2  | 257.1244  | 129.0659        | 240.0979       | 120.5526         |                |                  | Q    | 2389.0336 | 1195.0204       | 2372.0070      | 1186.5072        | 2371.0230      | 1186.0152        | 20 |
| 3  | 386.1670  | 193.5872        | 369.1405       | 185.0739         |                |                  | Q    | 2260.9750 | 1130.9911       | 2243.9485      | 1122.4779        | 2242.9645      | 1121.9859        | 19 |
| 4  | 523.2259  | 262.1166        | 506.1994       | 253.6033         |                |                  | H    | 2131.9324 | 1066.4698       | 2114.9059      | 1057.9566        | 2113.9219      | 1057.4646        | 18 |
| 5  | 636.3100  | 318.6586        | 619.2835       | 310.1454         |                |                  | L    | 1994.8735 | 997.9404        | 1977.8470      | 989.4271         | 1976.8629      | 988.9351         | 17 |
| 6  | 783.3784  | 392.1928        | 766.3519       | 383.6796         |                |                  | F    | 1881.7894 | 941.3984        | 1864.7629      | 932.8851         | 1863.7789      | 932.3931         | 16 |
| 7  | 840.3999  | 420.7036        | 823.3733       | 412.1903         |                |                  | G    | 1734.7210 | 867.8642        | 1717.6945      | 859.3509         | 1716.7105      | 858.8589         | 15 |
| 8  | 927.4319  | 464.2196        | 910.4054       | 455.7063         | 909.4213       | 455.2143         | S    | 1677.6996 | 839.3534        | 1660.6730      | 830.8401         | 1659.6890      | 830.3481         | 14 |
| 9  | 1041.4748 | 521.2411        | 1024.4483      | 512.7278         | 1023.4643      | 512.2358         | N    | 1590.6675 | 795.8374        | 1573.6410      | 787.3241         | 1572.6570      | 786.8321         | 13 |
| 10 | 1140.5432 | 570.7753        | 1123.5167      | 562.2620         | 1122.5327      | 561.7700         | V    | 1476.6246 | 738.8159        | 1459.5981      | 730.3027         | 1458.6140      | 729.8107         | 12 |
| 11 | 1241.5909 | 621.2991        | 1224.5644      | 612.7858         | 1223.5804      | 612.2938         | T    | 1377.5562 | 689.2817        | 1360.5297      | 680.7685         | 1359.5456      | 680.2765         | 11 |
| 12 | 1356.6179 | 678.8126        | 1339.5913      | 670.2993         | 1338.6073      | 669.8073         | D    | 1276.5085 | 638.7579        | 1259.4820      | 630.2446         | 1258.4980      | 629.7526         | 10 |
| 13 | 1516.6485 | 758.8279        | 1499.6220      | 750.3146         | 1498.6380      | 749.8226         | C    | 1161.4816 | 581.2444        | 1144.4550      | 572.7312         | 1143.4710      | 572.2391         | 9  |
| 14 | 1603.6805 | 802.3439        | 1586.6540      | 793.8306         | 1585.6700      | 793.3386         | S    | 1001.4509 | 501.2291        | 984.4244       | 492.7158         | 983.4404       | 492.2238         | 8  |
| 15 | 1660.7020 | 830.8546        | 1643.6755      | 822.3414         | 1642.6914      | 821.8494         | G    | 914.4189  | 457.7131        | 897.3924       | 449.1998         |                |                  | 7  |
| 16 | 1775.7290 | 888.3681        | 1758.7024      | 879.8548         | 1757.7184      | 879.3628         | N    | 857.3974  | 429.2024        | 840.3709       | 420.6891         |                |                  | 6  |
| 17 | 1922.7974 | 961.9023        | 1905.7708      | 953.3890         | 1904.7868      | 952.8970         | F    | 742.3705  | 371.6889        | 725.3439       | 363.1756         |                |                  | 5  |
| 18 | 2082.8280 | 1041.9176       | 2065.8015      | 1033.4044        | 2064.8175      | 1032.9124        | C    | 595.3021  | 298.1547        | 578.2755       | 289.6414         |                |                  | 4  |
| 19 | 2195.9121 | 1098.4597       | 2178.8855      | 1089.9464        | 2177.9015      | 1089.4544        | L    | 435.2714  | 218.1394        | 418.2449       | 209.6261         |                |                  | 3  |
| 20 | 2342.9805 | 1171.9939       | 2325.9539      | 1163.4806        | 2324.9699      | 1162.9886        | F    | 322.1874  | 161.5973        | 305.1608       | 153.0840         |                |                  | 2  |
| 21 |           |                 |                |                  |                |                  | R    | 175.1190  | 88.0631         | 158.0924       | 79.5498          |                |                  | 1  |

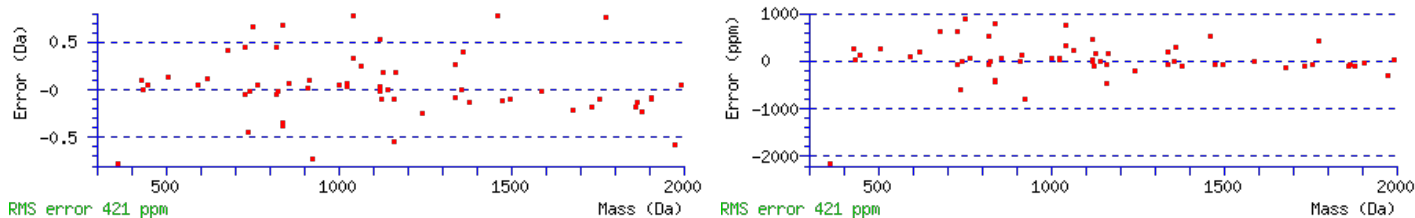

NCBI BLAST search of [QQQHLEFGSNVTDCSGNFCLER](#)

(Parameters: blastp, nr protein database, expect=20000, no filter, PAM30)

Other BLAST [web gateways](#)

All matches to this query

| Score | Mr(calc)  | Delta  | Sequence                               | Site Analysis             |
|-------|-----------|--------|----------------------------------------|---------------------------|
| 36.9  | 2516.0849 | 1.0028 | <a href="#">QQQHLEFGSNVTDCSGNFCLER</a> | Deamidated Q3, N16 23.78% |
| 36.9  | 2516.0849 | 1.0028 | <a href="#">QQQHLEFGSNVTDCSGNFCLER</a> | Deamidated Q2, N16 23.78% |
| 36.9  | 2516.0849 | 1.0028 | <a href="#">QQQHLEFGSNVTDCSGNFCLER</a> | Deamidated Q1, N16 23.78% |
| 36.6  | 2516.0849 | 1.0028 | <a href="#">QQQHLEFGSNVTDCSGNFCLER</a> | Deamidated N9, N16 22.34% |
| 25.7  | 2516.0849 | 1.0028 | <a href="#">QQQHLEFGSNVTDCSGNFCLER</a> | Deamidated Q3, N9 1.82%   |
| 25.7  | 2516.0849 | 1.0028 | <a href="#">QQQHLEFGSNVTDCSGNFCLER</a> | Deamidated Q2, N9 1.82%   |
| 25.7  | 2516.0849 | 1.0028 | <a href="#">QQQHLEFGSNVTDCSGNFCLER</a> | Deamidated Q1, N9 1.82%   |
| 18.2  | 2516.0849 | 1.0028 | <a href="#">QQQHLEFGSNVTDCSGNFCLER</a> | Deamidated Q2, Q3 0.33%   |
| 18.2  | 2516.0849 | 1.0028 | <a href="#">QQQHLEFGSNVTDCSGNFCLER</a> | Deamidated Q1, Q3 0.33%   |
| 16.5  | 2516.0849 | 1.0028 | <a href="#">QQQHLEFGSNVTDCSGNFCLER</a> | Deamidated Q1, Q2 0.22%   |

Mascot: <http://www.matrixscience.com/>

# MASCOT SCIENCE Mascot Search Results

## Peptide View

MS/MS Fragmentation of **DSCKASCNCNSIY**

Found in **J3KPA1** in **con\_Xuniprot\_HUMAN3**, J3KPA1\_HUMAN Cysteine-rich secretory protein 3 OS=Homo sapiens GN=CRISP3 PE=2 SV=1

Match to Query 8413: 1665.611608 from(833.813080,2+) intensity(9400.8848) rtinseconds(424) scans(806) index(25954)

Title: 111019\_Est\_MI\_YS\_G\_08Spectrum669\_scans\_\_806

Data file C:\\mascot\\20140703\_Tmgf\_1D\\CSV\_UseAnalysis\\MasterCSV\\All\_Glyco\\mgf\\ptm\\UC18ERLIC\_PTM\_35D.mgf

Click mouse within plot area to zoom in by factor of two about that point

Or, to Da

Label all possible matches Label matches used for scoring

Show Y-axis

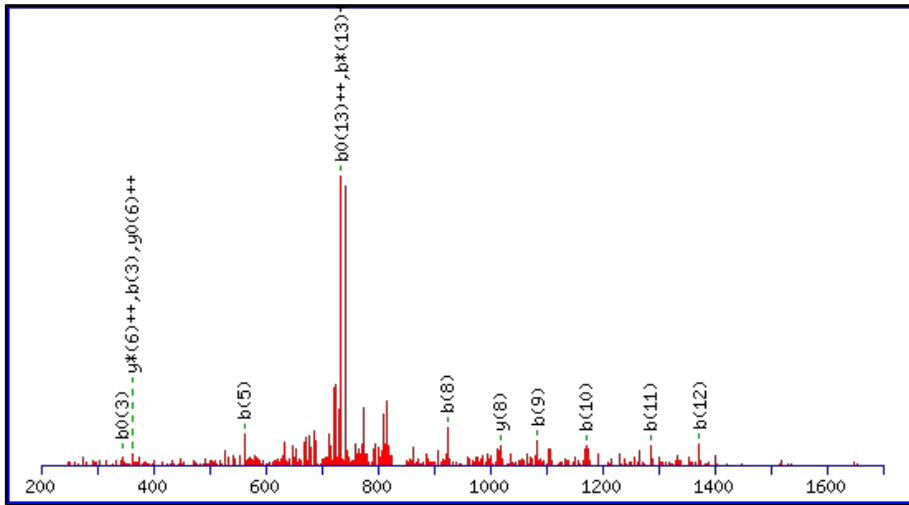

Monoisotopic mass of neutral peptide Mr(calc): 1665.6069

Fixed modifications: Carbamidomethyl (C) (apply to specified residues or termini only)

Variable modifications:

N8 : Deamidated (NQ)

Ions Score: 48 Expect: 5.5e-005

Matches : 13/140 fragment ions using 14 most intense peaks ([help](#))

| #  | b                | b <sup>++</sup> | b <sup>*</sup> | b <sup>***</sup> | b <sup>0</sup>  | b <sup>0++</sup> | Seq. | y                | y <sup>++</sup> | y <sup>*</sup> | y <sup>***</sup> | y <sup>0</sup> | y <sup>0++</sup> | #  |
|----|------------------|-----------------|----------------|------------------|-----------------|------------------|------|------------------|-----------------|----------------|------------------|----------------|------------------|----|
| 1  | 116.0342         | 58.5207         |                |                  | 98.0237         | 49.5155          | D    |                  |                 |                |                  |                |                  | 14 |
| 2  | 203.0662         | 102.0368        |                |                  | 185.0557        | 93.0315          | S    | 1551.5872        | 776.2973        | 1534.5607      | 767.7840         | 1533.5767      | 767.2920         | 13 |
| 3  | <b>363.0969</b>  | 182.0521        |                |                  | <b>345.0863</b> | 173.0468         | C    | 1464.5552        | 732.7812        | 1447.5287      | 724.2680         | 1446.5446      | 723.7760         | 12 |
| 4  | 491.1919         | 246.0996        | 474.1653       | 237.5863         | 473.1813        | 237.0943         | K    | 1304.5246        | 652.7659        | 1287.4980      | 644.2526         | 1286.5140      | 643.7606         | 11 |
| 5  | <b>562.2290</b>  | 281.6181        | 545.2024       | 273.1049         | 544.2184        | 272.6128         | A    | 1176.4296        | 588.7184        | 1159.4031      | 580.2052         | 1158.4190      | 579.7132         | 10 |
| 6  | 649.2610         | 325.1341        | 632.2345       | 316.6209         | 631.2504        | 316.1289         | S    | 1105.3925        | 553.1999        | 1088.3659      | 544.6866         | 1087.3819      | 544.1946         | 9  |
| 7  | 809.2917         | 405.1495        | 792.2651       | 396.6362         | 791.2811        | 396.1442         | C    | <b>1018.3605</b> | 509.6839        | 1001.3339      | 501.1706         | 1000.3499      | 500.6786         | 8  |
| 8  | <b>924.3186</b>  | 462.6629        | 907.2920       | 454.1497         | 906.3080        | 453.6577         | N    | 858.3298         | 429.6685        | 841.3033       | 421.1553         | 840.3192       | 420.6633         | 7  |
| 9  | <b>1084.3492</b> | 542.6783        | 1067.3227      | 534.1650         | 1066.3387       | 533.6730         | C    | 743.3029         | 372.1551        | 726.2763       | <b>363.6418</b>  | 725.2923       | <b>363.1498</b>  | 6  |
| 10 | <b>1171.3813</b> | 586.1943        | 1154.3547      | 577.6810         | 1153.3707       | 577.1890         | S    | 583.2722         | 292.1397        | 566.2457       | 283.6265         | 565.2617       | 283.1345         | 5  |
| 11 | <b>1285.4242</b> | 643.2157        | 1268.3976      | 634.7025         | 1267.4136       | 634.2105         | N    | 496.2402         | 248.6237        | 479.2136       | 240.1105         | 478.2296       | 239.6185         | 4  |
| 12 | <b>1372.4562</b> | 686.7318        | 1355.4297      | 678.2185         | 1354.4457       | 677.7265         | S    | 382.1973         | 191.6023        |                |                  | 364.1867       | 182.5970         | 3  |
| 13 | 1485.5403        | 743.2738        | 1468.5137      | <b>734.7605</b>  | 1467.5297       | <b>734.2685</b>  | I    | 295.1652         | 148.0863        |                |                  |                |                  | 2  |
| 14 |                  |                 |                |                  |                 |                  | Y    | 182.0812         | 91.5442         |                |                  |                |                  | 1  |

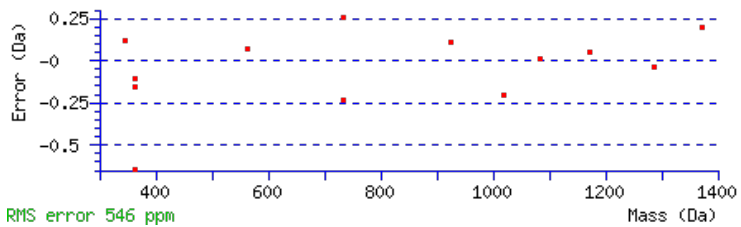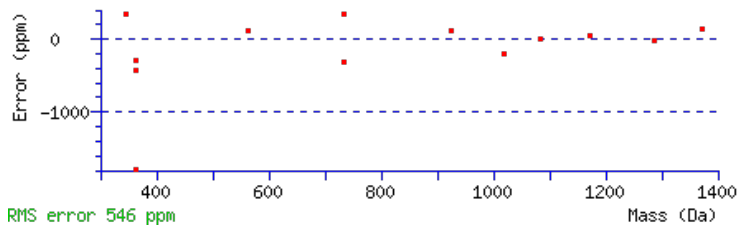

NCBI **BLAST** search of [DSCKASCNCSNSIY](#)

(Parameters: blastp, nr protein database, expect=20000, no filter, PAM30)

Other BLAST [web gateways](#)

**All matches to this query**

| Score | Mr(calc)  | Delta  | Sequence                       | Site Analysis        |
|-------|-----------|--------|--------------------------------|----------------------|
| 47.7  | 1665.6069 | 0.0047 | <a href="#">DSCKASCNCSNSIY</a> | Deamidated N8 99.86% |
| 19.1  | 1665.6069 | 0.0047 | <a href="#">DSCKASCNCSNSIY</a> | Deamidated N11 0.14% |
| 5.5   | 1664.6038 | 1.0078 | <a href="#">EQCITTQMCDSKM</a>  |                      |

Mascot: <http://www.matrixscience.com/>



# MASCOT SCIENCE Mascot Search Results

## Peptide View

MS/MS Fragmentation of **LVPHMNVSAVEK**

Found in **J3KRP0** in **con\_Xuniprot\_HUMAN3**, J3KRP0\_HUMAN Beta-Ala-His dipeptidase OS=Homo sapiens GN=CNDP1 PE=2 SV=1

Match to Query 2016: 1323.690268 from(662.852410,2+) intensity(26937.2324) rtinseconds(784) scans(1679) index(12359)

Title: 111019\_Est\_ISCardio\_NMI\_YS\_G\_9Spectrum1443\_scans\_\_1679

Data file C:\\mascot\\20140703\_Tmgf\_1D\\CSV\_UseAnalysis\\MasterCSV\\All\_Glyco\\mgf\\ptm\\UC18ERLIC\_PTM\_35D.mgf

Click mouse within plot area to zoom in by factor of two about that point

Or, to Da

Label all possible matches Label matches used for scoring

Show Y-axis

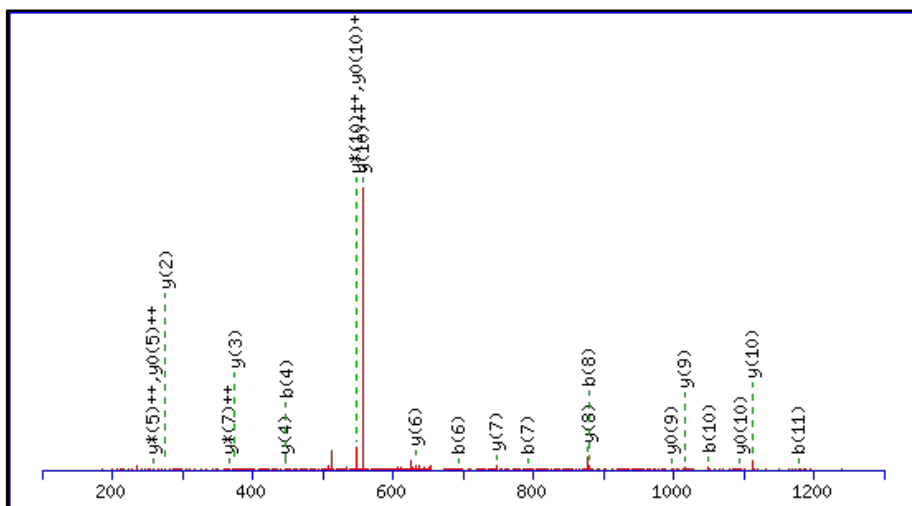

Monoisotopic mass of neutral peptide Mr(calc): 1323.6857

Fixed modifications: Carbamidomethyl (C) (apply to specified residues or termini only)

Variable modifications:

N6 : Deamidated (NQ)

Ions Score: 46 Expect: 0.0051

Matches : 23/106 fragment ions using 44 most intense peaks ([help](#))

| #  | b         | b <sup>++</sup> | b <sup>*</sup> | b <sup>*++</sup> | b <sup>0</sup> | b <sup>0++</sup> | Seq. | y         | y <sup>++</sup> | y <sup>*</sup> | y <sup>*++</sup> | y <sup>0</sup> | y <sup>0++</sup> | #  |
|----|-----------|-----------------|----------------|------------------|----------------|------------------|------|-----------|-----------------|----------------|------------------|----------------|------------------|----|
| 1  | 114.0913  | 57.5493         |                |                  |                |                  | L    |           |                 |                |                  |                |                  | 12 |
| 2  | 213.1598  | 107.0835        |                |                  |                |                  | V    | 1211.6089 | 606.3081        | 1194.5823      | 597.7948         | 1193.5983      | 597.3028         | 11 |
| 3  | 310.2125  | 155.6099        |                |                  |                |                  | P    | 1112.5405 | 556.7739        | 1095.5139      | 548.2606         | 1094.5299      | 547.7686         | 10 |
| 4  | 447.2714  | 224.1394        |                |                  |                |                  | H    | 1015.4877 | 508.2475        | 998.4612       | 499.7342         | 997.4771       | 499.2422         | 9  |
| 5  | 578.3119  | 289.6596        |                |                  |                |                  | M    | 878.4288  | 439.7180        | 861.4022       | 431.2048         | 860.4182       | 430.7128         | 8  |
| 6  | 693.3389  | 347.1731        | 676.3123       | 338.6598         |                |                  | N    | 747.3883  | 374.1978        | 730.3618       | 365.6845         | 729.3777       | 365.1925         | 7  |
| 7  | 792.4073  | 396.7073        | 775.3807       | 388.1940         |                |                  | V    | 632.3614  | 316.6843        | 615.3348       | 308.1710         | 614.3508       | 307.6790         | 6  |
| 8  | 879.4393  | 440.2233        | 862.4128       | 431.7100         | 861.4287       | 431.2180         | S    | 533.2930  | 267.1501        | 516.2664       | 258.6368         | 515.2824       | 258.1448         | 5  |
| 9  | 950.4764  | 475.7418        | 933.4499       | 467.2286         | 932.4658       | 466.7366         | A    | 446.2609  | 223.6341        | 429.2344       | 215.1208         | 428.2504       | 214.6288         | 4  |
| 10 | 1049.5448 | 525.2761        | 1032.5183      | 516.7628         | 1031.5343      | 516.2708         | V    | 375.2238  | 188.1155        | 358.1973       | 179.6023         | 357.2132       | 179.1103         | 3  |
| 11 | 1178.5874 | 589.7973        | 1161.5609      | 581.2841         | 1160.5769      | 580.7921         | E    | 276.1554  | 138.5813        | 259.1288       | 130.0681         | 258.1448       | 129.5761         | 2  |
| 12 |           |                 |                |                  |                |                  | K    | 147.1128  | 74.0600         | 130.0863       | 65.5468          |                |                  | 1  |

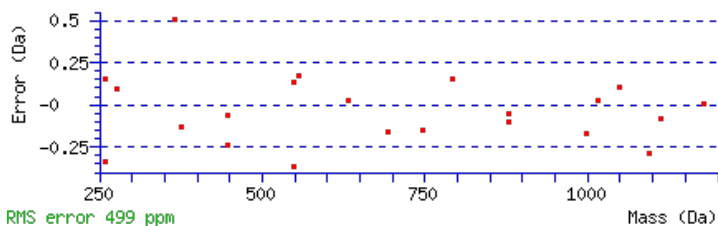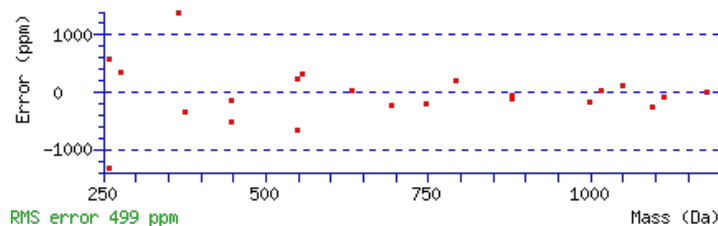

NCBI **BLAST** search of [LVPHMNVSAVEK](#)

(Parameters: blastp, nr protein database, expect=20000, no filter, PAM30)

Other BLAST [web gateways](#)

**All matches to this query**

| Score | Mr(calc)  | Delta  | Sequence                      |
|-------|-----------|--------|-------------------------------|
| 45.6  | 1323.6857 | 0.0046 | <a href="#">LVPHMNVSAVEK</a>  |
| 7.1   | 1322.6904 | 0.9999 | <a href="#">KVQIFDLMDAK</a>   |
| 6.8   | 1321.6846 | 2.0057 | <a href="#">INSKRMMNAIK</a>   |
| 4.6   | 1321.6799 | 2.0104 | <a href="#">MEEKLLQLSSK</a>   |
| 4.0   | 1322.6917 | 0.9985 | <a href="#">FPEHILMHRK</a>    |
| 3.7   | 1321.6886 | 2.0017 | <a href="#">KLMDWKNMIK</a>    |
| 3.6   | 1321.6812 | 2.0090 | <a href="#">NVGLPKEGPHMK</a>  |
| 3.5   | 1321.6812 | 2.0091 | <a href="#">NLMANRPAKYK</a>   |
| 3.4   | 1323.6895 | 0.0008 | <a href="#">VLPGSNGKPNGQR</a> |
| 3.4   | 1323.6857 | 0.0046 | <a href="#">VITDRLGFKQM</a>   |

**Mascot:** <http://www.matrixscience.com/>

# MASCOT SCIENCE Mascot Search Results

## Peptide View

MS/MS Fragmentation of **LVPHMNVSAVEK**

Found in **J3KRP0** in **con\_Xuniprot\_HUMAN3**, J3KRP0\_HUMAN Beta-Ala-His dipeptidase OS=Homo sapiens GN=CNDP1 PE=2 SV=1

Match to Query 2030: 1339.685168 from(670.849860,2+) intensity(8134.3296) rtinseconds(317) scans(631) index(6112)

Title: 111019\_Est\_ISCardio\_NMI\_YP\_G\_9Spectrum539\_scans\_631

Data file C:\\mascot\\20140703\_Tmgf\_1D\\CSV\_UseAnalysis\\MasterCSV\\All\_Glyco\\mgf\\ptm\\UC18ERLIC\_PTM\_35D.mgf

Click mouse within plot area to zoom in by factor of two about that point

Or, to Da

Label all possible matches Label matches used for scoring

Show Y-axis

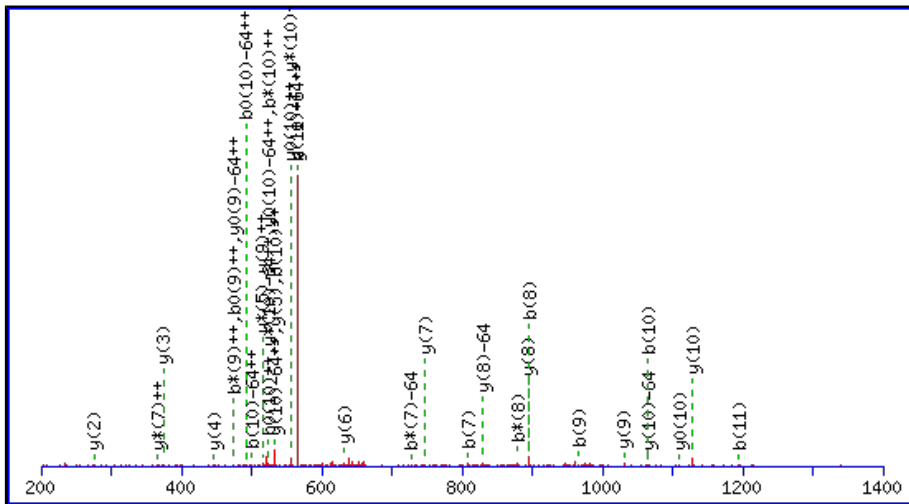

Monoisotopic mass of neutral peptide Mr(calc): 1339.6806

Fixed modifications: Carbamidomethyl (C) (apply to specified residues or termini only)

Variable modifications:

M5 : Oxidation (M), with neutral losses 0.0000(shown in table), 63.9983

N6 : Deamidated (NQ)

Ions Score: 37 Expect: 0.037

Matches : 37/164 fragment ions using 82 most intense peaks ([help](#))

| #  | b                | b <sup>++</sup> | b*              | b <sup>+++</sup> | b <sup>0</sup> | b <sup>0++</sup> | Seq. | y                | y <sup>++</sup> | y*              | y <sup>+++</sup> | y <sup>0</sup>   | y <sup>0++</sup> | #  |
|----|------------------|-----------------|-----------------|------------------|----------------|------------------|------|------------------|-----------------|-----------------|------------------|------------------|------------------|----|
| 1  | 114.0913         | 57.5493         |                 |                  |                |                  | L    |                  |                 |                 |                  |                  |                  | 12 |
| 2  | 213.1598         | 107.0835        |                 |                  |                |                  | V    | 1227.6038        | 614.3055        | 1210.5773       | 605.7923         | 1209.5932        | 605.3003         | 11 |
| 3  | 310.2125         | 155.6099        |                 |                  |                |                  | P    | <b>1128.5354</b> | <b>564.7713</b> | 1111.5088       | <b>556.2581</b>  | <b>1110.5248</b> | <b>555.7660</b>  | 10 |
| 4  | 447.2714         | 224.1394        |                 |                  |                |                  | H    | <b>1031.4826</b> | <b>516.2449</b> | 1014.4561       | 507.7317         | 1013.4721        | 507.2397         | 9  |
| 5  | 594.3068         | 297.6571        |                 |                  |                |                  | M    | <b>894.4237</b>  | 447.7155        | 877.3972        | 439.2022         | 876.4131         | 438.7102         | 8  |
| 6  | 709.3338         | 355.1705        | 692.3072        | 346.6572         |                |                  | N    | <b>747.3883</b>  | 374.1978        | 730.3618        | <b>365.6845</b>  | 729.3777         | 365.1925         | 7  |
| 7  | <b>808.4022</b>  | 404.7047        | 791.3756        | 396.1915         |                |                  | V    | <b>632.3614</b>  | 316.6843        | 615.3348        | 308.1710         | 614.3508         | 307.6790         | 6  |
| 8  | <b>895.4342</b>  | 448.2207        | <b>878.4077</b> | 439.7075         | 877.4236       | 439.2155         | S    | <b>533.2930</b>  | 267.1501        | <b>516.2664</b> | 258.6368         | 515.2824         | 258.1448         | 5  |
| 9  | <b>966.4713</b>  | 483.7393        | 949.4448        | <b>475.2260</b>  | 948.4608       | <b>474.7340</b>  | A    | <b>446.2609</b>  | 223.6341        | 429.2344        | 215.1208         | 428.2504         | 214.6288         | 4  |
| 10 | <b>1065.5397</b> | <b>533.2735</b> | 1048.5132       | <b>524.7602</b>  | 1047.5292      | <b>524.2682</b>  | V    | <b>375.2238</b>  | 188.1155        | 358.1973        | 179.6023         | 357.2132         | 179.1103         | 3  |
| 11 | <b>1194.5823</b> | 597.7948        | 1177.5558       | 589.2815         | 1176.5718      | 588.7895         | E    | <b>276.1554</b>  | 138.5813        | 259.1288        | 130.0681         | 258.1448         | 129.5761         | 2  |
| 12 |                  |                 |                 |                  |                |                  | K    | 147.1128         | 74.0600         | 130.0863        | 65.5468          |                  |                  | 1  |

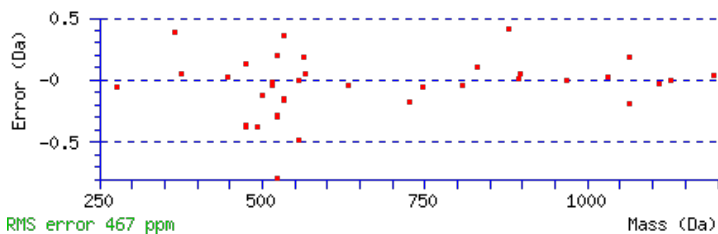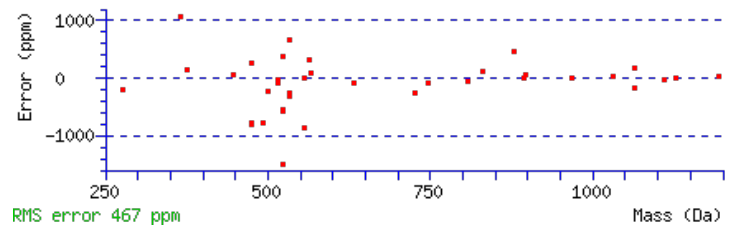

NCBI **BLAST** search of [LVPHMNVSAVEK](#)

(Parameters: blastp, nr protein database, expect=20000, no filter, PAM30)

Other BLAST [web gateways](#)

**All matches to this query**

| Score | Mr(calc)  | Delta   | Sequence                     |
|-------|-----------|---------|------------------------------|
| 36.9  | 1339.6806 | 0.0046  | <a href="#">LVPHMNVSAVEK</a> |
| 10.0  | 1338.6788 | 1.0064  | <a href="#">MRIPALNAYMK</a>  |
| 7.5   | 1337.6795 | 2.0056  | <a href="#">SSVQKMMQAGKK</a> |
| 7.3   | 1337.6728 | 2.0124  | <a href="#">IPSEFTDAERR</a>  |
| 7.2   | 1338.6853 | 0.9999  | <a href="#">FVENGMISVAKK</a> |
| 4.3   | 1337.6826 | 2.0025  | <a href="#">AYSLEIETREK</a>  |
| 4.0   | 1339.6884 | -0.0032 | <a href="#">QKYLENYLNR</a>   |
| 3.7   | 1339.6918 | -0.0066 | <a href="#">IVHPESVVSSMR</a> |
| 3.7   | 1337.6795 | 2.0056  | <a href="#">MSILGKGSMDK</a>  |
| 3.7   | 1337.6800 | 2.0052  | <a href="#">RSSNLOSRSER</a>  |

**Mascot:** <http://www.matrixscience.com/>

# MATRIX SCIENCE Mascot Search Results

## Peptide View

MS/MS Fragmentation of **AAPAPQEATATFNSTADR**

Found in **J3QKR4** in **con\_Xuniprot\_HUMAN3**, J3QKR4\_HUMAN Intercellular adhesion molecule 2 OS=Homo sapiens GN=ICAM2 PE=2 SV=1

Match to Query 10897: 1818.841468 from(910.428010,2+) intensity(3988.0891) rtinseconds(848) scans(1644) index(28364)

Title: 111019\_Est\_MI\_YS\_G\_13Spectrum1372\_scans\_1644

Data file C:\mascot\20140703\_Tmgf\_1D\CSV\_UseAnalysis\MasterCSV\All\_Glyco\mgf\ptm\UC18ERLIC\_PTM\_35D.mgf

Click mouse within plot area to zoom in by factor of two about that point

Or, to Da

Label all possible matches Label matches used for scoring

Show Y-axis

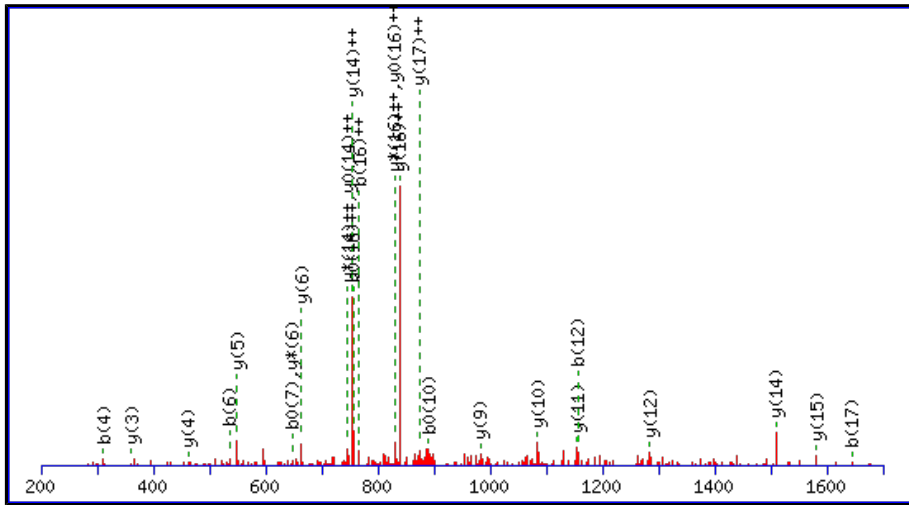

Monoisotopic mass of neutral peptide Mr(calc): 1818.8384

Fixed modifications: Carbamidomethyl (C) (apply to specified residues or termini only)

Variable modifications:

N13 : Deamidated (NQ)

Ions Score: 41 Expect: 0.014

Matches : 26/180 fragment ions using 56 most intense peaks ([help](#))

| #  | b         | b <sup>++</sup> | b <sup>*</sup> | b <sup>***</sup> | b <sup>0</sup> | b <sup>0++</sup> | Seq. | y         | y <sup>++</sup> | y <sup>*</sup> | y <sup>***</sup> | y <sup>0</sup> | y <sup>0++</sup> | #  |
|----|-----------|-----------------|----------------|------------------|----------------|------------------|------|-----------|-----------------|----------------|------------------|----------------|------------------|----|
| 1  | 72.0444   | 36.5258         |                |                  |                |                  | A    |           |                 |                |                  |                |                  | 18 |
| 2  | 143.0815  | 72.0444         |                |                  |                |                  | A    | 1748.8086 | 874.9079        | 1731.7820      | 866.3947         | 1730.7980      | 865.9026         | 17 |
| 3  | 240.1343  | 120.5708        |                |                  |                |                  | P    | 1677.7715 | 839.3894        | 1660.7449      | 830.8761         | 1659.7609      | 830.3841         | 16 |
| 4  | 311.1714  | 156.0893        |                |                  |                |                  | A    | 1580.7187 | 790.8630        | 1563.6922      | 782.3497         | 1562.7081      | 781.8577         | 15 |
| 5  | 408.2241  | 204.6157        |                |                  |                |                  | P    | 1509.6816 | 755.3444        | 1492.6550      | 746.8312         | 1491.6710      | 746.3392         | 14 |
| 6  | 536.2827  | 268.6450        | 519.2562       | 260.1317         |                |                  | Q    | 1412.6288 | 706.8181        | 1395.6023      | 698.3048         | 1394.6183      | 697.8128         | 13 |
| 7  | 665.3253  | 333.1663        | 648.2988       | 324.6530         | 647.3148       | 324.1610         | E    | 1284.5703 | 642.7888        | 1267.5437      | 634.2755         | 1266.5597      | 633.7835         | 12 |
| 8  | 736.3624  | 368.6849        | 719.3359       | 360.1716         | 718.3519       | 359.6796         | A    | 1155.5277 | 578.2675        | 1138.5011      | 569.7542         | 1137.5171      | 569.2622         | 11 |
| 9  | 837.4101  | 419.2087        | 820.3836       | 410.6954         | 819.3995       | 410.2034         | T    | 1084.4905 | 542.7489        | 1067.4640      | 534.2356         | 1066.4800      | 533.7436         | 10 |
| 10 | 908.4472  | 454.7273        | 891.4207       | 446.2140         | 890.4367       | 445.7220         | A    | 983.4429  | 492.2251        | 966.4163       | 483.7118         | 965.4323       | 483.2198         | 9  |
| 11 | 1009.4949 | 505.2511        | 992.4684       | 496.7378         | 991.4843       | 496.2458         | T    | 912.4058  | 456.7065        | 895.3792       | 448.1932         | 894.3952       | 447.7012         | 8  |
| 12 | 1156.5633 | 578.7853        | 1139.5368      | 570.2720         | 1138.5528      | 569.7800         | F    | 811.3581  | 406.1827        | 794.3315       | 397.6694         | 793.3475       | 397.1774         | 7  |
| 13 | 1271.5903 | 636.2988        | 1254.5637      | 627.7855         | 1253.5797      | 627.2935         | N    | 664.2897  | 332.6485        | 647.2631       | 324.1352         | 646.2791       | 323.6432         | 6  |
| 14 | 1358.6223 | 679.8148        | 1341.5957      | 671.3015         | 1340.6117      | 670.8095         | S    | 549.2627  | 275.1350        | 532.2362       | 266.6217         | 531.2522       | 266.1297         | 5  |
| 15 | 1459.6700 | 730.3386        | 1442.6434      | 721.8253         | 1441.6594      | 721.3333         | T    | 462.2307  | 231.6190        | 445.2041       | 223.1057         | 444.2201       | 222.6137         | 4  |
| 16 | 1530.7071 | 765.8572        | 1513.6805      | 757.3439         | 1512.6965      | 756.8519         | A    | 361.1830  | 181.0951        | 344.1565       | 172.5819         | 343.1724       | 172.0899         | 3  |
| 17 | 1645.7340 | 823.3707        | 1628.7075      | 814.8574         | 1627.7235      | 814.3654         | D    | 290.1459  | 145.5766        | 273.1193       | 137.0633         | 272.1353       | 136.5713         | 2  |
| 18 |           |                 |                |                  |                |                  | R    | 175.1190  | 88.0631         | 158.0924       | 79.5498          |                |                  | 1  |

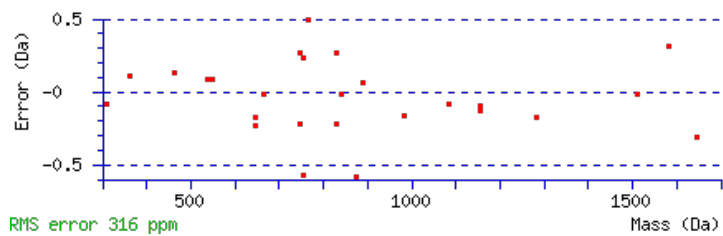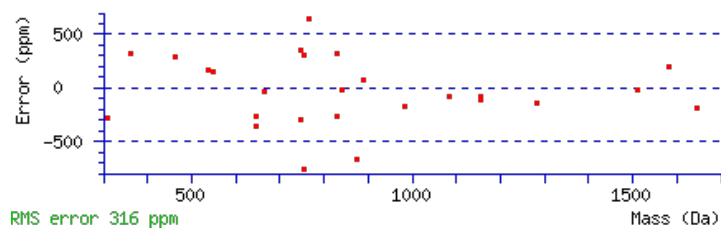

NCBI **BLAST** search of [AAPAPQEATATFNSTADR](#)

(Parameters: blastp, nr protein database, expect=20000, no filter, PAM30)

Other BLAST [web gateways](#)

**All matches to this query**

| Score | Mr(calc)  | Delta  | Sequence                           | Site Analysis         |
|-------|-----------|--------|------------------------------------|-----------------------|
| 41.2  | 1818.8384 | 0.0031 | <a href="#">AAPAPQEATATFNSTADR</a> | Deamidated N13 99.99% |
| 2.6   | 1818.8325 | 0.0089 | <a href="#">RPGPGAAPYYSDYSR</a>    |                       |
| 1.8   | 1818.8384 | 0.0031 | <a href="#">AAPAPQEATATFNSTADR</a> | Deamidated Q6 0.01%   |
| 0.4   | 1817.8406 | 1.0008 | <a href="#">YLYGRHMQANPEPPK</a>    |                       |
| 0.2   | 1817.8440 | 0.9974 | <a href="#">QMGVPEDMPGLLGGENR</a>  |                       |

**Mascot:** <http://www.matrixscience.com/>

# MATRIX SCIENCE Mascot Search Results

## Peptide View

MS/MS Fragmentation of **ATPEAANASELAALR**

Found in **K7EKF6** in **con\_Xuniprot\_HUMAN3**, K7EKF6\_HUMAN Angiopoietin-related protein 6 OS=Homo sapiens GN=ANGPTL6 PE=2 SV=1

Match to Query 6675: 1484.749768 from(743.382160,2+) intensity(12293.5537) rtinseconds(1218) scans(2517) index(82)

Title: 111019\_Est\_ISCardio\_NMI\_200000g\_G\_3Spectrum2154\_scans\_2517

Data file C:\mascot\20140703\_Tmgf\_1D\CSV\_UseAnalysis\MasterCSV\All\_Glyco\mgf\ptm\UC18ERLIC\_PTM\_35D.mgf

Click mouse within plot area to zoom in by factor of two about that point

Or, to Da

Label all possible matches Label matches used for scoring

Show Y-axis

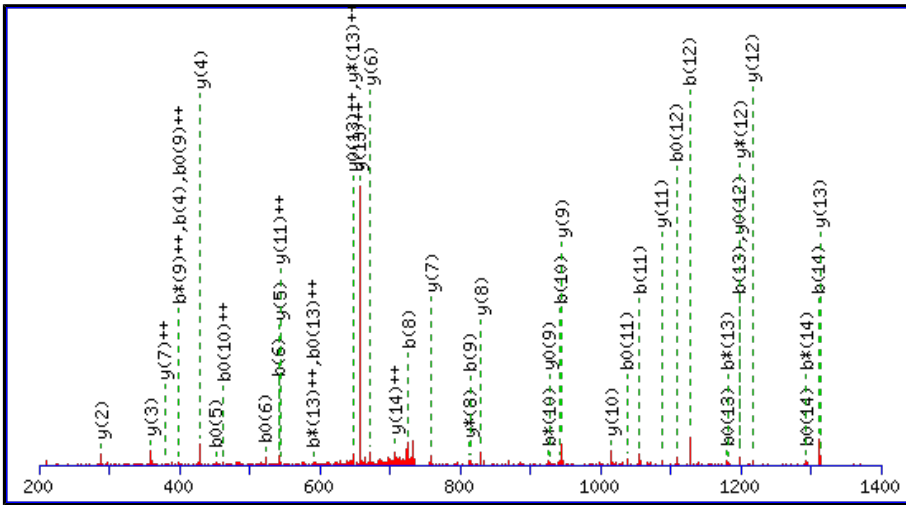

Monoisotopic mass of neutral peptide Mr(calc): 1484.7470

Fixed modifications: Carbamidomethyl (C) (apply to specified residues or termini only)

Variable modifications:

N7 : Deamidated (NQ)

Ions Score: 82 Expect: 1.1e-006

Matches : 46/144 fragment ions using 72 most intense peaks ([help](#))

| #  | b         | b <sup>++</sup> | b <sup>*</sup> | b <sup>*++</sup> | b <sup>0</sup> | b <sup>0++</sup> | Seq. | y         | y <sup>++</sup> | y <sup>*</sup> | y <sup>*++</sup> | y <sup>0</sup> | y <sup>0++</sup> | #  |
|----|-----------|-----------------|----------------|------------------|----------------|------------------|------|-----------|-----------------|----------------|------------------|----------------|------------------|----|
| 1  | 72.0444   | 36.5258         |                |                  |                |                  | A    |           |                 |                |                  |                |                  | 15 |
| 2  | 173.0921  | 87.0497         |                |                  | 155.0815       | 78.0444          | T    | 1414.7172 | 707.8623        | 1397.6907      | 699.3490         | 1396.7067      | 698.8570         | 14 |
| 3  | 270.1448  | 135.5761        |                |                  | 252.1343       | 126.5708         | P    | 1313.6696 | 657.3384        | 1296.6430      | 648.8251         | 1295.6590      | 648.3331         | 13 |
| 4  | 399.1874  | 200.0974        |                |                  | 381.1769       | 191.0921         | E    | 1216.6168 | 608.8120        | 1199.5903      | 600.2988         | 1198.6062      | 599.8068         | 12 |
| 5  | 470.2245  | 235.6159        |                |                  | 452.2140       | 226.6106         | A    | 1087.5742 | 544.2907        | 1070.5477      | 535.7775         | 1069.5636      | 535.2855         | 11 |
| 6  | 541.2617  | 271.1345        |                |                  | 523.2511       | 262.1292         | A    | 1016.5371 | 508.7722        | 999.5106       | 500.2589         | 998.5265       | 499.7669         | 10 |
| 7  | 656.2886  | 328.6479        | 639.2620       | 320.1347         | 638.2780       | 319.6427         | N    | 945.5000  | 473.2536        | 928.4734       | 464.7404         | 927.4894       | 464.2483         | 9  |
| 8  | 727.3257  | 364.1665        | 710.2992       | 355.6532         | 709.3151       | 355.1612         | A    | 830.4730  | 415.7402        | 813.4465       | 407.2269         | 812.4625       | 406.7349         | 8  |
| 9  | 814.3577  | 407.6825        | 797.3312       | 399.1692         | 796.3472       | 398.6772         | S    | 759.4359  | 380.2216        | 742.4094       | 371.7083         | 741.4254       | 371.2163         | 7  |
| 10 | 943.4003  | 472.2038        | 926.3738       | 463.6905         | 925.3898       | 463.1985         | E    | 672.4039  | 336.7056        | 655.3774       | 328.1923         | 654.3933       | 327.7003         | 6  |
| 11 | 1056.4844 | 528.7458        | 1039.4578      | 520.2326         | 1038.4738      | 519.7406         | L    | 543.3613  | 272.1843        | 526.3348       | 263.6710         |                |                  | 5  |
| 12 | 1127.5215 | 564.2644        | 1110.4950      | 555.7511         | 1109.5109      | 555.2591         | A    | 430.2772  | 215.6423        | 413.2507       | 207.1290         |                |                  | 4  |
| 13 | 1198.5586 | 599.7829        | 1181.5321      | 591.2697         | 1180.5481      | 590.7777         | A    | 359.2401  | 180.1237        | 342.2136       | 171.6104         |                |                  | 3  |
| 14 | 1311.6427 | 656.3250        | 1294.6161      | 647.8117         | 1293.6321      | 647.3197         | L    | 288.2030  | 144.6051        | 271.1765       | 136.0919         |                |                  | 2  |
| 15 |           |                 |                |                  |                |                  | R    | 175.1190  | 88.0631         | 158.0924       | 79.5498          |                |                  | 1  |



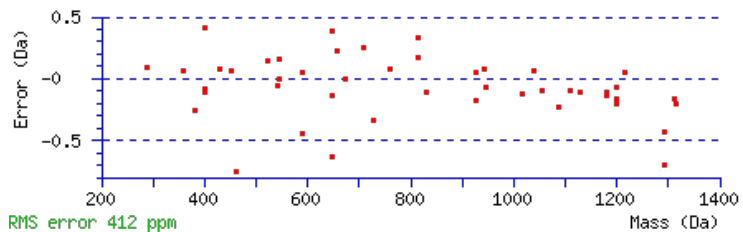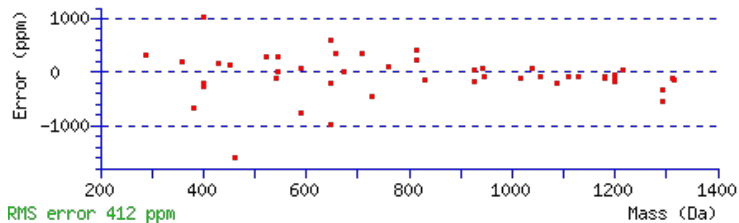

NCBI **BLAST** search of [ATPEAANASELAALR](#)

(Parameters: blastp, nr protein database, expect=20000, no filter, PAM30)

Other BLAST [web gateways](#)

**All matches to this query**

| Score | Mr(calc)  | Delta   | Sequence                        |
|-------|-----------|---------|---------------------------------|
| 81.8  | 1484.7470 | 0.0027  | <a href="#">ATPEAANASELAALR</a> |
| 13.7  | 1484.7518 | -0.0020 | <a href="#">GNEMLRQDPRLR</a>    |
| 13.7  | 1484.7518 | -0.0020 | <a href="#">GNEMLRQDPRLR</a>    |
| 13.7  | 1484.7480 | 0.0018  | <a href="#">VGMKPMAPTTSPR</a>   |
| 9.8   | 1484.7471 | 0.0027  | <a href="#">LLAQDDSEQTLR</a>    |
| 8.5   | 1482.7426 | 2.0071  | <a href="#">IGTGEVPSAPREN</a>   |
| 8.5   | 1482.7426 | 2.0071  | <a href="#">LGTGEVPSAPREN</a>   |
| 7.9   | 1484.7518 | -0.0020 | <a href="#">LACPVGSRAGASSPR</a> |
| 7.7   | 1484.7480 | 0.0018  | <a href="#">VGMKPMAPTTSPR</a>   |
| 6.8   | 1483.7518 | 0.9980  | <a href="#">LANDAGNTVLLPER</a>  |

Mascot: <http://www.matrixscience.com/>

# MASCOT SCIENCE Mascot Search Results

## Peptide View

MS/MS Fragmentation of **VLNASAEAQR**

Found in **K7EKF6** in **con\_Xuniprot\_HUMAN3**, K7EKF6\_HUMAN Angiotensin-converting enzyme 2 OS=Homo sapiens  
 GN=ANGPTL6 PE=2 SV=1

Match to Query 208: 1058.538328 from(530.276440,2+) intensity(1054.8698) rtinseconds(255) scans(402) index(1822)

Title: 111019\_Est\_ISCardio\_NMI\_YP\_G\_4Spectrum306\_scans\_402

Data file C:\\mascot\\20140703\_Tmgf\_1D\\CSV\_UseAnalysis\\MasterCSV\\All\_Glyco\\mgf\\ptm\\UC18ERLIC\_PTM\_35D.mgf

Click mouse within plot area to zoom in by factor of two about that point

Or, to Da

Label all possible matches Label matches used for scoring

Show Y-axis

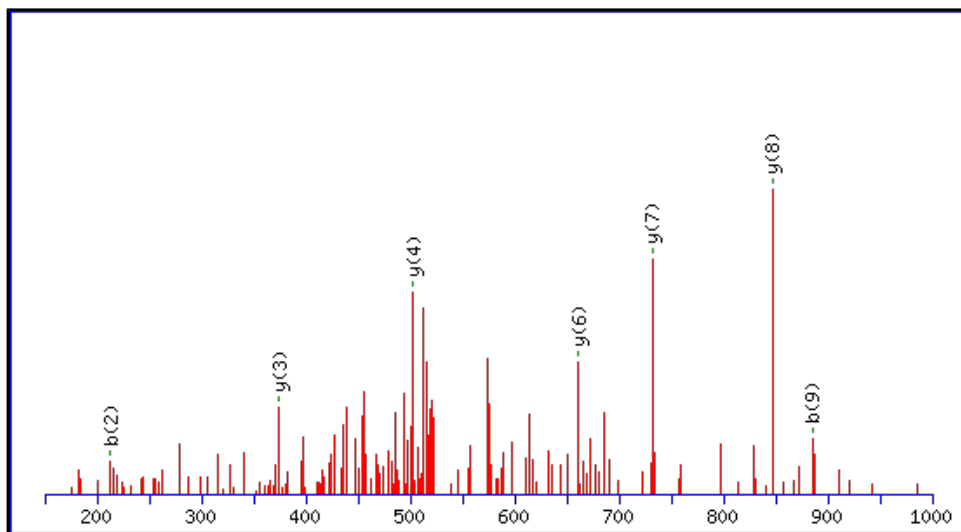

Monoisotopic mass of neutral peptide **Mr(calc):** 1058.5356

**Fixed modifications:** Carbamidomethyl (C) (apply to specified residues or termini only)

**Variable modifications:**

N3 : Deamidated (NQ)

**Ions Score:** 38 **Expect:** 0.032

**Matches :** 7/90 fragment ions using 9 most intense peaks ([help](#))

| #  | b               | b <sup>++</sup> | b*       | b <sup>*++</sup> | b <sup>0</sup> | b <sup>0++</sup> | Seq. | y               | y <sup>++</sup> | y*       | y <sup>*++</sup> | y <sup>0</sup> | y <sup>0++</sup> | #  |
|----|-----------------|-----------------|----------|------------------|----------------|------------------|------|-----------------|-----------------|----------|------------------|----------------|------------------|----|
| 1  | 100.0757        | 50.5415         |          |                  |                |                  | V    |                 |                 |          |                  |                |                  | 10 |
| 2  | <b>213.1598</b> | 107.0835        |          |                  |                |                  | L    | 960.4745        | 480.7409        | 943.4480 | 472.2276         | 942.4639       | 471.7356         | 9  |
| 3  | 328.1867        | 164.5970        | 311.1601 | 156.0837         |                |                  | N    | <b>847.3904</b> | 424.1989        | 830.3639 | 415.6856         | 829.3799       | 415.1936         | 8  |
| 4  | 399.2238        | 200.1155        | 382.1973 | 191.6023         |                |                  | A    | <b>732.3635</b> | 366.6854        | 715.3369 | 358.1721         | 714.3529       | 357.6801         | 7  |
| 5  | 486.2558        | 243.6316        | 469.2293 | 235.1183         | 468.2453       | 234.6263         | S    | <b>661.3264</b> | 331.1668        | 644.2998 | 322.6536         | 643.3158       | 322.1615         | 6  |
| 6  | 557.2930        | 279.1501        | 540.2664 | 270.6368         | 539.2824       | 270.1448         | A    | 574.2944        | 287.6508        | 557.2678 | 279.1375         | 556.2838       | 278.6455         | 5  |
| 7  | 686.3355        | 343.6714        | 669.3090 | 335.1581         | 668.3250       | 334.6661         | E    | <b>503.2572</b> | 252.1323        | 486.2307 | 243.6190         | 485.2467       | 243.1270         | 4  |
| 8  | 757.3727        | 379.1900        | 740.3461 | 370.6767         | 739.3621       | 370.1847         | A    | <b>374.2146</b> | 187.6110        | 357.1881 | 179.0977         |                |                  | 3  |
| 9  | <b>885.4312</b> | 443.2193        | 868.4047 | 434.7060         | 867.4207       | 434.2140         | Q    | 303.1775        | 152.0924        | 286.1510 | 143.5791         |                |                  | 2  |
| 10 |                 |                 |          |                  |                |                  | R    | 175.1190        | 88.0631         | 158.0924 | 79.5498          |                |                  | 1  |

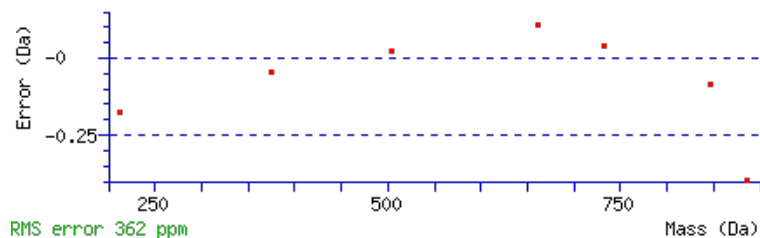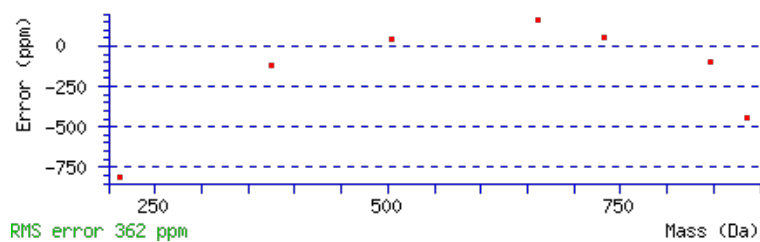

NCBI **BLAST** search of [VLNASAEAR](#)  
 (Parameters: blastp, nr protein database, expect=20000, no filter, PAM30)  
 Other BLAST [web gateways](#)

**All matches to this query**

| Score | Mr(calc)  | Delta   | Sequence                   |
|-------|-----------|---------|----------------------------|
| 37.7  | 1058.5356 | 0.0027  | <a href="#">VLNASAEAR</a>  |
| 6.3   | 1058.5356 | 0.0027  | <a href="#">VIENGEKNR</a>  |
| 5.2   | 1058.5356 | 0.0027  | <a href="#">GEQQIQKAR</a>  |
| 4.8   | 1057.5379 | 1.0005  | <a href="#">FLKFMNSR</a>   |
| 4.5   | 1056.5312 | 2.0071  | <a href="#">GQNPTGEAKR</a> |
| 3.7   | 1058.5356 | 0.0027  | <a href="#">NQEELLRR</a>   |
| 2.9   | 1056.5274 | 2.0110  | <a href="#">TGKSYLMNK</a>  |
| 2.7   | 1057.5305 | 1.0078  | <a href="#">FPKEGTHSR</a>  |
| 2.2   | 1058.5356 | 0.0027  | <a href="#">QGNASDVVLR</a> |
| 2.2   | 1058.5430 | -0.0047 | <a href="#">VLPMQVQSR</a>  |

Mascot: <http://www.matrixscience.com/>

# MASCOT SCIENCE Mascot Search Results

## Peptide View

MS/MS Fragmentation of **ELLETVVNRTR**

Found in **K7EMC3** in **con\_Xuniprot\_HUMAN3**, K7EMC3\_HUMAN Apolipoprotein C-IV OS=Homo sapiens GN=APOC4 PE=2 SV=1

Match to Query 2017: 1329.726852 from(444.249560,3+) intensity(24947.9785) rtinseconds(924) scans(2187) index(24430)

Title: 111019\_Est\_MI\_YS\_G\_06Spectrum1887\_scans\_\_2187

Data file C:\\mascot\\20140703\_Tmgf\_1D\\CSV\_UseAnalysis\\MasterCSV\\All\_Glyco\\mgf\\ptm\\UC18ERLIC\_PTM\_35D.mgf

Click mouse within plot area to zoom in by factor of two about that point

Or, to Da

Label all possible matches Label matches used for scoring

Show Y-axis

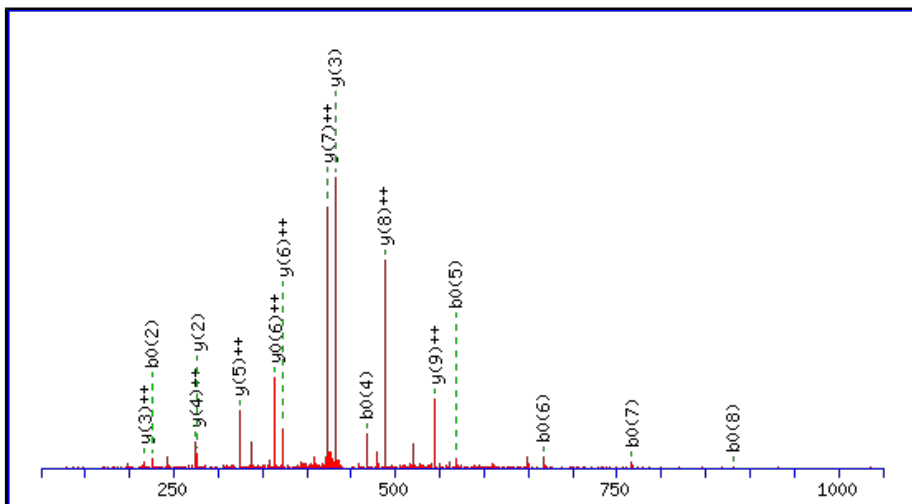

Monoisotopic mass of neutral peptide Mr(calc): 1329.7252

Fixed modifications: Carbamidomethyl (C) (apply to specified residues or termini only)

Variable modifications:

N8 : Deamidated (NQ)

Ions Score: 36 Expect: 0.05

Matches : 16/104 fragment ions using 26 most intense peaks ([help](#))

| #  | b         | b <sup>++</sup> | b <sup>*</sup> | b <sup>*++</sup> | b <sup>0</sup> | b <sup>0++</sup> | Seq. | y         | y <sup>++</sup> | y <sup>*</sup> | y <sup>*++</sup> | y <sup>0</sup> | y <sup>0++</sup> | #  |
|----|-----------|-----------------|----------------|------------------|----------------|------------------|------|-----------|-----------------|----------------|------------------|----------------|------------------|----|
| 1  | 130.0499  | 65.5286         |                |                  | 112.0393       | 56.5233          | E    |           |                 |                |                  |                |                  | 11 |
| 2  | 243.1339  | 122.0706        |                |                  | 225.1234       | 113.0653         | L    | 1201.6899 | 601.3486        | 1184.6634      | 592.8353         | 1183.6793      | 592.3433         | 10 |
| 3  | 356.2180  | 178.6126        |                |                  | 338.2074       | 169.6074         | L    | 1088.6058 | 544.8066        | 1071.5793      | 536.2933         | 1070.5953      | 535.8013         | 9  |
| 4  | 485.2606  | 243.1339        |                |                  | 467.2500       | 234.1287         | E    | 975.5218  | 488.2645        | 958.4952       | 479.7513         | 957.5112       | 479.2592         | 8  |
| 5  | 586.3083  | 293.6578        |                |                  | 568.2977       | 284.6525         | T    | 846.4792  | 423.7432        | 829.4526       | 415.2300         | 828.4686       | 414.7380         | 7  |
| 6  | 685.3767  | 343.1920        |                |                  | 667.3661       | 334.1867         | V    | 745.4315  | 373.2194        | 728.4050       | 364.7061         | 727.4209       | 364.2141         | 6  |
| 7  | 784.4451  | 392.7262        |                |                  | 766.4345       | 383.7209         | V    | 646.3631  | 323.6852        | 629.3365       | 315.1719         | 628.3525       | 314.6799         | 5  |
| 8  | 899.4720  | 450.2397        | 882.4455       | 441.7264         | 881.4615       | 441.2344         | N    | 547.2947  | 274.1510        | 530.2681       | 265.6377         | 529.2841       | 265.1457         | 4  |
| 9  | 1055.5732 | 528.2902        | 1038.5466      | 519.7769         | 1037.5626      | 519.2849         | R    | 432.2677  | 216.6375        | 415.2412       | 208.1242         | 414.2572       | 207.6322         | 3  |
| 10 | 1156.6208 | 578.8141        | 1139.5943      | 570.3008         | 1138.6103      | 569.8088         | T    | 276.1666  | 138.5870        | 259.1401       | 130.0737         | 258.1561       | 129.5817         | 2  |
| 11 |           |                 |                |                  |                |                  | R    | 175.1190  | 88.0631         | 158.0924       | 79.5498          |                |                  | 1  |

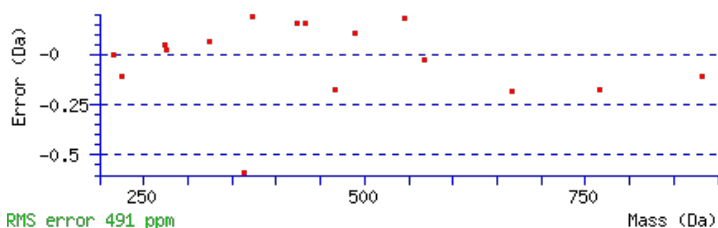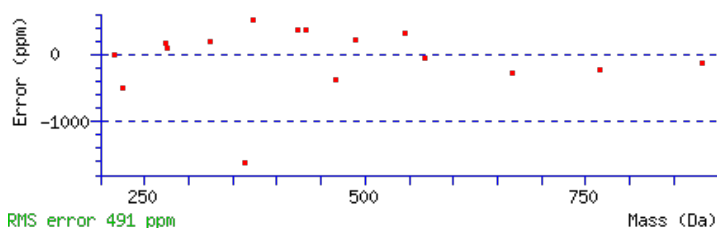

NCBI BLAST search of **ELLETVVNRTR**

(Parameters: blastp, nr protein database, expect=20000, no filter, PAM30)

Other BLAST [web gateways](#)

**All matches to this query**

| Score | Mr(calc)  | Delta   | Sequence                      |
|-------|-----------|---------|-------------------------------|
| 36.1  | 1329.7252 | 0.0016  | <a href="#">ELLETVVNRTR</a>   |
| 8.9   | 1328.7300 | 0.9969  | <a href="#">KNLGGITTPAETK</a> |
| 8.3   | 1327.7208 | 2.0061  | <a href="#">KPEORLGSREK</a>   |
| 7.7   | 1329.7252 | 0.0017  | <a href="#">LQTAQINAGKKR</a>  |
| 7.6   | 1329.7292 | -0.0024 | <a href="#">ESWKVKSEIPK</a>   |
| 5.2   | 1329.7252 | 0.0017  | <a href="#">LLESQLQSQKR</a>   |
| 5.0   | 1328.7299 | 0.9969  | <a href="#">LQILNASSDVLR</a>  |
| 4.3   | 1329.7326 | -0.0058 | <a href="#">ELILAGTMLDVR</a>  |
| 4.1   | 1329.7252 | 0.0017  | <a href="#">DKQNISQLEKK</a>   |
| 4.1   | 1327.7208 | 2.0061  | <a href="#">LQQLAESRVR</a>    |

**Mascot:** <http://www.matrixscience.com/>

# MASCOT SCIENCE Mascot Search Results

## Peptide View

MS/MS Fragmentation of **EGDHEFLEVP EAQEDVEATFPVHQPGNYSCSYR**

Found in **M0R009** in **con\_Xumiprot\_HUMAN3**, M0R009\_HUMAN Alpha-1B-glycoprotein (Fragment) OS=Homo sapiens GN=A1BG PE=2 SV=1

Match to Query 28124: 3836.669096 from(960.174550,4+) intensity(1271696.5000) rtinseconds(1871) scans(4945) index(24030)  
 Title: 111019\_Est\_MI\_YS\_G\_05Spectrum4276\_scans\_4945  
 Data file C:\mascot\20140703\_Tmgf\_1D\CSV\_UseAnalysis\MasterCSV\All\_Glyco\mgf\ptm\UC18ERLIC\_PTM\_35D.mgf

Click mouse within plot area to zoom in by factor of two about that point

Or, to Da  
 Label all possible matches Label matches used for scoring  
 Show Y-axis

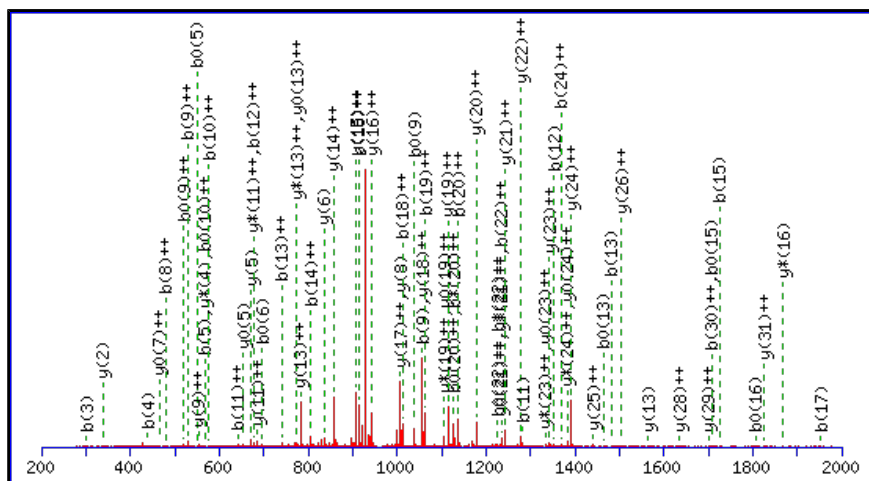

Monoisotopic mass of neutral peptide Mr(calc): 3836.6537  
 Fixed modifications: Carbamidomethyl (C) (apply to specified residues or termini only)  
 Variable modifications:  
 N27 : Deamidated (NQ)  
 Ions Score: 97 Expect: 1.5e-008  
 Matches : 74/356 fragment ions using 119 most intense peaks ([help](#))

| #  | b                | b <sup>++</sup>  | b <sup>*</sup> | b <sup>***</sup> | b <sup>0</sup>   | b <sup>0++</sup> | Seq. | y                | y <sup>++</sup>  | y <sup>*</sup>   | y <sup>***</sup> | y <sup>0</sup> | y <sup>0++</sup> | #  |
|----|------------------|------------------|----------------|------------------|------------------|------------------|------|------------------|------------------|------------------|------------------|----------------|------------------|----|
| 1  | 130.0499         | 65.5286          |                |                  | 112.0393         | 56.5233          | E    |                  |                  |                  |                  |                |                  | 33 |
| 2  | 187.0713         | 94.0393          |                |                  | 169.0608         | 85.0340          | G    | 3708.6183        | 1854.8128        | 3691.5918        | 1846.2995        | 3690.6078      | 1845.8075        | 32 |
| 3  | <b>302.0983</b>  | 151.5528         |                |                  | 284.0877         | 142.5475         | D    | 3651.5969        | <b>1826.3021</b> | 3634.5703        | 1817.7888        | 3633.5863      | 1817.2968        | 31 |
| 4  | <b>439.1572</b>  | 220.0822         |                |                  | 421.1466         | 211.0769         | H    | 3536.5699        | 1768.7886        | 3519.5434        | 1760.2753        | 3518.5594      | 1759.7833        | 30 |
| 5  | <b>568.1998</b>  | 284.6035         |                |                  | <b>550.1892</b>  | 275.5982         | E    | 3399.5110        | <b>1700.2592</b> | 3382.4845        | 1691.7459        | 3381.5005      | 1691.2539        | 29 |
| 6  | 715.2682         | 358.1377         |                |                  | <b>697.2576</b>  | 349.1325         | F    | 3270.4684        | <b>1635.7379</b> | 3253.4419        | 1627.2246        | 3252.4579      | 1626.7326        | 28 |
| 7  | 828.3523         | 414.6798         |                |                  | 810.3417         | 405.6745         | L    | 3123.4000        | 1562.2036        | 3106.3735        | 1553.6904        | 3105.3895      | 1553.1984        | 27 |
| 8  | 957.3949         | <b>479.2011</b>  |                |                  | 939.3843         | 470.1958         | E    | 3010.3160        | <b>1505.6616</b> | 2993.2894        | 1497.1483        | 2992.3054      | 1496.6563        | 26 |
| 9  | <b>1056.4633</b> | <b>528.7353</b>  |                |                  | <b>1038.4527</b> | <b>519.7300</b>  | V    | 2881.2734        | <b>1441.1403</b> | 2864.2468        | 1432.6270        | 2863.2628      | 1432.1350        | 25 |
| 10 | 1153.5160        | <b>577.2617</b>  |                |                  | 1135.5055        | <b>568.2564</b>  | P    | 2782.2050        | <b>1391.6061</b> | 2765.1784        | <b>1383.0928</b> | 2764.1944      | <b>1382.6008</b> | 24 |
| 11 | <b>1282.5586</b> | <b>641.7829</b>  |                |                  | 1264.5481        | 632.7777         | E    | 2685.1522        | <b>1343.0797</b> | 2668.1256        | <b>1334.5665</b> | 2667.1416      | <b>1334.0744</b> | 23 |
| 12 | <b>1353.5957</b> | <b>677.3015</b>  |                |                  | 1335.5852        | 668.2962         | A    | 2556.1096        | <b>1278.5584</b> | 2539.0830        | 1270.0452        | 2538.0990      | 1269.5532        | 22 |
| 13 | <b>1481.6543</b> | <b>741.3308</b>  | 1464.6278      | 732.8175         | <b>1463.6438</b> | 732.3255         | Q    | 2485.0725        | <b>1243.0399</b> | 2468.0459        | <b>1234.5266</b> | 2467.0619      | <b>1234.0346</b> | 21 |
| 14 | 1610.6969        | <b>805.8521</b>  | 1593.6704      | 797.3388         | 1592.6863        | 796.8468         | E    | 2357.0139        | <b>1179.0106</b> | 2339.9874        | 1170.4973        | 2339.0033      | 1170.0053        | 20 |
| 15 | <b>1725.7239</b> | 863.3656         | 1708.6973      | 854.8523         | <b>1707.7133</b> | 854.3603         | D    | 2227.9713        | <b>1114.4893</b> | 2210.9448        | <b>1105.9760</b> | 2209.9607      | <b>1105.4840</b> | 19 |
| 16 | 1824.7923        | <b>912.8998</b>  | 1807.7657      | 904.3865         | <b>1806.7817</b> | 903.8945         | V    | 2112.9444        | <b>1056.9758</b> | 2095.9178        | 1048.4625        | 2094.9338      | 1047.9705        | 18 |
| 17 | <b>1953.8349</b> | 977.4211         | 1936.8083      | 968.9078         | 1935.8243        | 968.4158         | E    | 2013.8760        | <b>1007.4416</b> | 1996.8494        | 998.9283         | 1995.8654      | 998.4363         | 17 |
| 18 | 2024.8720        | <b>1012.9396</b> | 2007.8454      | 1004.4263        | 2006.8614        | 1003.9343        | A    | 1884.8334        | <b>942.9203</b>  | <b>1867.8068</b> | 934.4070         | 1866.8228      | 933.9150         | 16 |
| 19 | 2125.9197        | <b>1063.4635</b> | 2108.8931      | 1054.9502        | 2107.9091        | 1054.4582        | T    | 1813.7962        | <b>907.4018</b>  | 1796.7697        | 898.8885         | 1795.7857      | 898.3965         | 15 |
| 20 | 2272.9881        | <b>1136.9977</b> | 2255.9615      | <b>1128.4844</b> | 2254.9775        | <b>1127.9924</b> | F    | 1712.7486        | <b>856.8779</b>  | 1695.7220        | 848.3646         | 1694.7380      | 847.8726         | 14 |
| 21 | 2370.0408        | 1185.5241        | 2353.0143      | 1177.0108        | 2352.0303        | 1176.5188        | P    | <b>1565.6802</b> | <b>783.3437</b>  | 1548.6536        | <b>774.8304</b>  | 1547.6696      | <b>774.3384</b>  | 13 |
| 22 | 2469.1092        | <b>1235.0583</b> | 2452.0827      | <b>1226.5450</b> | 2451.0987        | <b>1226.0530</b> | V    | 1468.6274        | 734.8173         | 1451.6008        | 726.3041         | 1450.6168      | 725.8121         | 12 |

|    |           |           |           |           |           |           |   |           |          |           |          |           |          |    |
|----|-----------|-----------|-----------|-----------|-----------|-----------|---|-----------|----------|-----------|----------|-----------|----------|----|
| 23 | 2606.1682 | 1303.5877 | 2589.1416 | 1295.0744 | 2588.1576 | 1294.5824 | H | 1369.5590 | 685.2831 | 1352.5324 | 676.7699 | 1351.5484 | 676.2778 | 11 |
| 24 | 2734.2267 | 1367.6170 | 2717.2002 | 1359.1037 | 2716.2162 | 1358.6117 | Q | 1232.5001 | 616.7537 | 1215.4735 | 608.2404 | 1214.4895 | 607.7484 | 10 |
| 25 | 2831.2795 | 1416.1434 | 2814.2529 | 1407.6301 | 2813.2689 | 1407.1381 | P | 1104.4415 | 552.7244 | 1087.4149 | 544.2111 | 1086.4309 | 543.7191 | 9  |
| 26 | 2888.3010 | 1444.6541 | 2871.2744 | 1436.1408 | 2870.2904 | 1435.6488 | G | 1007.3887 | 504.1980 | 990.3622  | 495.6847 | 989.3782  | 495.1927 | 8  |
| 27 | 3003.3279 | 1502.1676 | 2986.3014 | 1493.6543 | 2985.3173 | 1493.1623 | N | 950.3673  | 475.6873 | 933.3407  | 467.1740 | 932.3567  | 466.6820 | 7  |
| 28 | 3166.3912 | 1583.6993 | 3149.3647 | 1575.1860 | 3148.3807 | 1574.6940 | Y | 835.3403  | 418.1738 | 818.3138  | 409.6605 | 817.3298  | 409.1685 | 6  |
| 29 | 3253.4233 | 1627.2153 | 3236.3967 | 1618.7020 | 3235.4127 | 1618.2100 | S | 672.2770  | 336.6421 | 655.2504  | 328.1289 | 654.2664  | 327.6368 | 5  |
| 30 | 3413.4539 | 1707.2306 | 3396.4274 | 1698.7173 | 3395.4433 | 1698.2253 | C | 585.2450  | 293.1261 | 568.2184  | 284.6128 | 567.2344  | 284.1208 | 4  |
| 31 | 3500.4859 | 1750.7466 | 3483.4594 | 1742.2333 | 3482.4754 | 1741.7413 | S | 425.2143  | 213.1108 | 408.1878  | 204.5975 | 407.2037  | 204.1055 | 3  |
| 32 | 3663.5493 | 1832.2783 | 3646.5227 | 1823.7650 | 3645.5387 | 1823.2730 | Y | 338.1823  | 169.5948 | 321.1557  | 161.0815 |           |          | 2  |
| 33 |           |           |           |           |           |           | R | 175.1190  | 88.0631  | 158.0924  | 79.5498  |           |          | 1  |

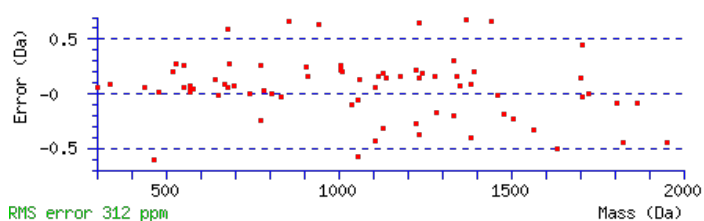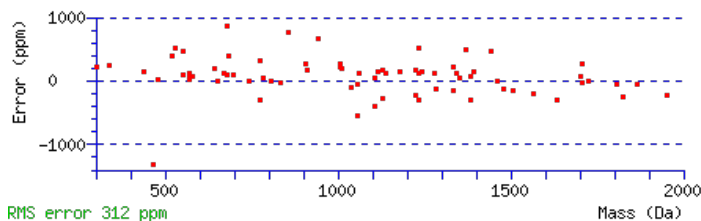

NCBI BLAST search of [EGDHEFLEVPEAQEDVEATFPVHQPGRNYSCSYR](#)

(Parameters: blastp, nr protein database, expect=20000, no filter, PAM30)

Other BLAST [web gateways](#)

All matches to this query

| Score | Mr(calc)  | Delta   | Sequence                                              | Site Analysis         |
|-------|-----------|---------|-------------------------------------------------------|-----------------------|
| 96.9  | 3836.6537 | 0.0154  | <a href="#">EGDHEFLEVPEAQEDVEATFPVHQPGRNYSCSYR</a>    | Deamidated N27 62.67% |
| 93.2  | 3836.6537 | 0.0154  | <a href="#">EGDHEFLEVPEAQEDVEATFPVHQPGRNYSCSYR</a>    | Deamidated Q24 26.49% |
| 89.3  | 3836.6537 | 0.0154  | <a href="#">EGDHEFLEVPEAQEDVEATFPVHQPGRNYSCSYR</a>    | Deamidated Q13 10.84% |
| 78.7  | 3835.6696 | 0.9994  | <a href="#">EGDHEFLEVPEAQEDVEATFPVHQPGRNYSCSYR</a>    |                       |
| 6.6   | 3836.6741 | -0.0050 | <a href="#">VRNPNSGSRSESPSMFSSTVLLVEYDQEGAGGASSGC</a> |                       |
| 6.6   | 3836.6741 | -0.0050 | <a href="#">VRNPNSGSRSESPSMFSSTVLLVEYDQEGAGGASSGC</a> |                       |
| 5.8   | 3834.6526 | 2.0165  | <a href="#">WFTDFNFMGPSTESNQIGSEGSRAENGPKECGPK</a>    |                       |
| 5.5   | 3834.6737 | 1.9954  | <a href="#">EDLRTLLRYYNQSEAGSHTLQNMVYDQVGPDPGR</a>    |                       |
| 4.8   | 3836.6835 | -0.0144 | <a href="#">LQGLPDESNNPNEVGMQCGANWFPQPNYSSDVR</a>     |                       |
| 4.5   | 3834.6526 | 2.0165  | <a href="#">WFTDFNFMGPSTESNQIGSEGSRAENGPKECGPK</a>    |                       |

Mascot: <http://www.matrixscience.com/>



# MATRIX SCIENCE Mascot Search Results

## Peptide View

MS/MS Fragmentation of **REGDHEFLEVPEAQEDVEATFPVHQPGNYSCSYR**

Found in **M0R009** in **con\_Xumiprot\_HUMAN3**, M0R009\_HUMAN Alpha-1B-glycoprotein (Fragment) OS=Homo sapiens GN=A1BG PE=2 SV=1

Match to Query 28278: 3992.769416 from(999.199630,4+) intensity(87841.7969) rtinseconds(1745) scans(4122) index(8916)

Title: 111019\_Est\_ISCardio\_NMI\_YS\_G\_4Spectrum3528\_scans\_4122

Data file C:\mascot\20140703\_Tmgf\_1D\CSV\_UseAnalysis\MasterCSV\All\_Glyco\mgf\ptm\UC18ERLIC\_PTM\_35D.mgf

Click mouse within plot area to zoom in by factor of two about that point

Or, to Da

Label all possible matches Label matches used for scoring

Show Y-axis

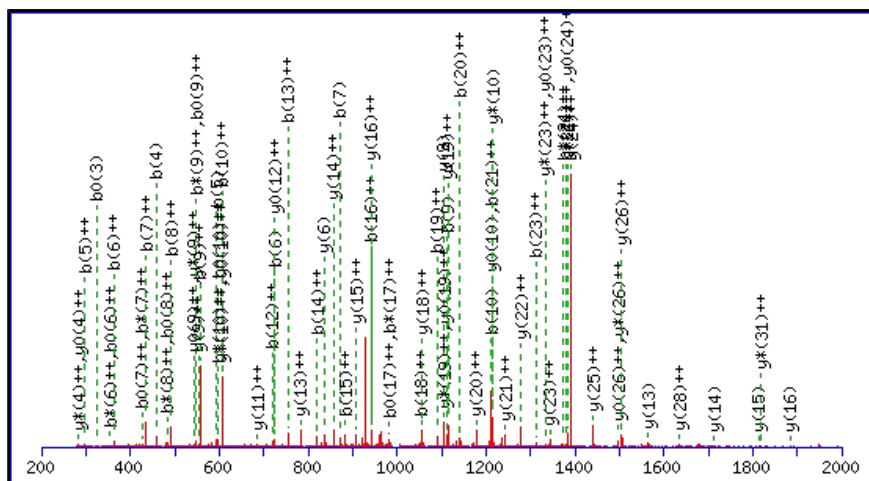

Monoisotopic mass of neutral peptide Mr(calc): 3992.7548

Fixed modifications: Carbamidomethyl (C) (apply to specified residues or termini only)

Variable modifications:

N28 : Deamidated (NQ)

Ions Score: 80 Expect: 9.5e-007

Matches : 77/390 fragment ions using 120 most intense peaks ([help](#))

| #  | b         | b <sup>++</sup> | b <sup>*</sup> | b <sup>***</sup> | b <sup>0</sup> | b <sup>0++</sup> | Seq. | y         | y <sup>++</sup> | y <sup>*</sup> | y <sup>***</sup> | y <sup>0</sup> | y <sup>0++</sup> | #  |
|----|-----------|-----------------|----------------|------------------|----------------|------------------|------|-----------|-----------------|----------------|------------------|----------------|------------------|----|
| 1  | 157.1084  | 79.0578         | 140.0818       | 70.5446          |                |                  | R    |           |                 |                |                  |                |                  | 34 |
| 2  | 286.1510  | 143.5791        | 269.1244       | 135.0659         | 268.1404       | 134.5738         | E    | 3837.6609 | 1919.3341       | 3820.6344      | 1910.8208        | 3819.6504      | 1910.3288        | 33 |
| 3  | 343.1724  | 172.0899        | 326.1459       | 163.5766         | 325.1619       | 163.0846         | G    | 3708.6183 | 1854.8128       | 3691.5918      | 1846.2995        | 3690.6078      | 1845.8075        | 32 |
| 4  | 458.1994  | 229.6033        | 441.1728       | 221.0901         | 440.1888       | 220.5980         | D    | 3651.5969 | 1826.3021       | 3634.5703      | 1817.7888        | 3633.5863      | 1817.2968        | 31 |
| 5  | 595.2583  | 298.1328        | 578.2318       | 289.6195         | 577.2477       | 289.1275         | H    | 3536.5699 | 1768.7886       | 3519.5434      | 1760.2753        | 3518.5594      | 1759.7833        | 30 |
| 6  | 724.3009  | 362.6541        | 707.2743       | 354.1408         | 706.2903       | 353.6488         | E    | 3399.5110 | 1700.2592       | 3382.4845      | 1691.7459        | 3381.5005      | 1691.2539        | 29 |
| 7  | 871.3693  | 436.1883        | 854.3428       | 427.6750         | 853.3587       | 427.1830         | F    | 3270.4684 | 1635.7379       | 3253.4419      | 1627.2246        | 3252.4579      | 1626.7326        | 28 |
| 8  | 984.4534  | 492.7303        | 967.4268       | 484.2170         | 966.4428       | 483.7250         | L    | 3123.4000 | 1562.2036       | 3106.3735      | 1553.6904        | 3105.3895      | 1553.1984        | 27 |
| 9  | 1113.4960 | 557.2516        | 1096.4694      | 548.7383         | 1095.4854      | 548.2463         | E    | 3010.3160 | 1505.6616       | 2993.2894      | 1497.1483        | 2992.3054      | 1496.6563        | 26 |
| 10 | 1212.5644 | 606.7858        | 1195.5378      | 598.2726         | 1194.5538      | 597.7805         | V    | 2881.2734 | 1441.1403       | 2864.2468      | 1432.6270        | 2863.2628      | 1432.1350        | 25 |
| 11 | 1309.6171 | 655.3122        | 1292.5906      | 646.7989         | 1291.6066      | 646.3069         | P    | 2782.2050 | 1391.6061       | 2765.1784      | 1383.0928        | 2764.1944      | 1382.6008        | 24 |
| 12 | 1438.6597 | 719.8335        | 1421.6332      | 711.3202         | 1420.6492      | 710.8282         | E    | 2685.1522 | 1343.0797       | 2668.1256      | 1334.5665        | 2667.1416      | 1334.0744        | 23 |
| 13 | 1509.6968 | 755.3521        | 1492.6703      | 746.8388         | 1491.6863      | 746.3468         | A    | 2556.1096 | 1278.5584       | 2539.0830      | 1270.0452        | 2538.0990      | 1269.5532        | 22 |
| 14 | 1637.7554 | 819.3814        | 1620.7289      | 810.8681         | 1619.7449      | 810.3761         | Q    | 2485.0725 | 1243.0399       | 2468.0459      | 1234.5266        | 2467.0619      | 1234.0346        | 21 |
| 15 | 1766.7980 | 883.9026        | 1749.7715      | 875.3894         | 1748.7875      | 874.8974         | E    | 2357.0139 | 1179.0106       | 2339.9874      | 1170.4973        | 2339.0033      | 1170.0053        | 20 |
| 16 | 1881.8250 | 941.4161        | 1864.7984      | 932.9028         | 1863.8144      | 932.4108         | D    | 2227.9713 | 1114.4893       | 2210.9448      | 1105.9760        | 2209.9607      | 1105.4840        | 19 |
| 17 | 1980.8934 | 990.9503        | 1963.8668      | 982.4371         | 1962.8828      | 981.9450         | V    | 2112.9444 | 1056.9758       | 2095.9178      | 1048.4625        | 2094.9338      | 1047.9705        | 18 |
| 18 | 2109.9360 | 1055.4716       | 2092.9094      | 1046.9583        | 2091.9254      | 1046.4663        | E    | 2013.8760 | 1007.4416       | 1996.8494      | 998.9283         | 1995.8654      | 998.4363         | 17 |
| 19 | 2180.9731 | 1090.9902       | 2163.9465      | 1082.4769        | 2162.9625      | 1081.9849        | A    | 1884.8334 | 942.9203        | 1867.8068      | 934.4070         | 1866.8228      | 933.9150         | 16 |
| 20 | 2282.0208 | 1141.5140       | 2264.9942      | 1133.0007        | 2264.0102      | 1132.5087        | T    | 1813.7962 | 907.4018        | 1796.7697      | 898.8885         | 1795.7857      | 898.3965         | 15 |
| 21 | 2429.0892 | 1215.0482       | 2412.0626      | 1206.5350        | 2411.0786      | 1206.0429        | F    | 1712.7486 | 856.8779        | 1695.7220      | 848.3646         | 1694.7380      | 847.8726         | 14 |
| 22 | 2526.1419 | 1263.5746       | 2509.1154      | 1255.0613        | 2508.1314      | 1254.5693        | P    | 1565.6802 | 783.3437        | 1548.6536      | 774.8304         | 1547.6696      | 774.3384         | 13 |

|    |           |                  |           |                  |           |           |   |                  |                 |                  |                 |                  |                 |    |
|----|-----------|------------------|-----------|------------------|-----------|-----------|---|------------------|-----------------|------------------|-----------------|------------------|-----------------|----|
| 23 | 2625.2104 | <b>1313.1088</b> | 2608.1838 | 1304.5955        | 2607.1998 | 1304.1035 | V | 1468.6274        | 734.8173        | 1451.6008        | 726.3041        | 1450.6168        | <b>725.8121</b> | 12 |
| 24 | 2762.2693 | <b>1381.6383</b> | 2745.2427 | <b>1373.1250</b> | 2744.2587 | 1372.6330 | H | 1369.5590        | <b>685.2831</b> | 1352.5324        | 676.7699        | 1351.5484        | 676.2778        | 11 |
| 25 | 2890.3278 | 1445.6676        | 2873.3013 | 1437.1543        | 2872.3173 | 1436.6623 | Q | 1232.5001        | 616.7537        | <b>1215.4735</b> | <b>608.2404</b> | <b>1214.4895</b> | <b>607.7484</b> | 10 |
| 26 | 2987.3806 | 1494.1939        | 2970.3541 | 1485.6807        | 2969.3700 | 1485.1887 | P | <b>1104.4415</b> | <b>552.7244</b> | 1087.4149        | <b>544.2111</b> | 1086.4309        | <b>543.7191</b> | 9  |
| 27 | 3044.4021 | 1522.7047        | 3027.3755 | 1514.1914        | 3026.3915 | 1513.6994 | G | 1007.3887        | 504.1980        | 990.3622         | 495.6847        | 989.3782         | 495.1927        | 8  |
| 28 | 3159.4290 | 1580.2181        | 3142.4025 | 1571.7049        | 3141.4184 | 1571.2129 | N | 950.3673         | 475.6873        | 933.3407         | 467.1740        | 932.3567         | 466.6820        | 7  |
| 29 | 3322.4923 | 1661.7498        | 3305.4658 | 1653.2365        | 3304.4818 | 1652.7445 | Y | <b>835.3403</b>  | 418.1738        | 818.3138         | 409.6605        | 817.3298         | 409.1685        | 6  |
| 30 | 3409.5244 | 1705.2658        | 3392.4978 | 1696.7525        | 3391.5138 | 1696.2605 | S | 672.2770         | 336.6421        | 655.2504         | 328.1289        | 654.2664         | 327.6368        | 5  |
| 31 | 3569.5550 | 1785.2811        | 3552.5285 | 1776.7679        | 3551.5445 | 1776.2759 | C | 585.2450         | 293.1261        | 568.2184         | <b>284.6128</b> | 567.2344         | <b>284.1208</b> | 4  |
| 32 | 3656.5870 | 1828.7972        | 3639.5605 | 1820.2839        | 3638.5765 | 1819.7919 | S | 425.2143         | 213.1108        | 408.1878         | 204.5975        | 407.2037         | 204.1055        | 3  |
| 33 | 3819.6504 | 1910.3288        | 3802.6238 | 1901.8156        | 3801.6398 | 1901.3235 | Y | 338.1823         | 169.5948        | 321.1557         | 161.0815        |                  |                 | 2  |
| 34 |           |                  |           |                  |           |           | R | 175.1190         | 88.0631         | 158.0924         | 79.5498         |                  |                 | 1  |

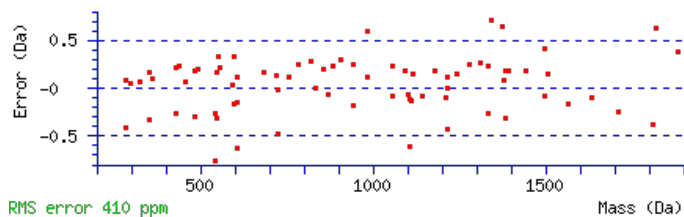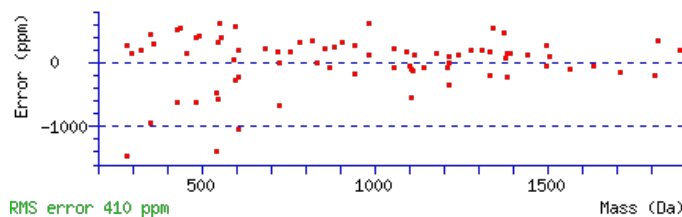

NCBI BLAST search of [REGDHEFLEVPEAQEDVEATFPVHQPGRNYSCSYR](#)

(Parameters: blastp, nr protein database, expect=20000, no filter, PAM30)

Other BLAST [web gateways](#)

All matches to this query

| Score | Mr(calc)  | Delta   | Sequence                                            | Site Analysis         |
|-------|-----------|---------|-----------------------------------------------------|-----------------------|
| 80.0  | 3992.7548 | 0.0147  | <a href="#">REGDHEFLEVPEAQEDVEATFPVHQPGRNYSCSYR</a> | Deamidated N28 61.89% |
| 75.6  | 3992.7548 | 0.0147  | <a href="#">REGDHEFLEVPEAQEDVEATFPVHQPGRNYSCSYR</a> | Deamidated Q25 22.42% |
| 74.0  | 3992.7548 | 0.0147  | <a href="#">REGDHEFLEVPEAQEDVEATFPVHQPGRNYSCSYR</a> | Deamidated Q14 15.69% |
| 73.1  | 3991.7708 | 0.9987  | <a href="#">REGDHEFLEVPEAQEDVEATFPVHQPGRNYSCSYR</a> |                       |
| 8.6   | 3990.7570 | 2.0124  | <a href="#">QGKPRHLHTLSGQQMAGYHQEVLWMTNQRNCR</a>    |                       |
| 6.2   | 3992.7740 | -0.0046 | <a href="#">WEQENLNLDPMLNSQSISGVTGTIMCPLDEVPEQK</a> |                       |
| 6.2   | 3992.7605 | 0.0089  | <a href="#">LHREQNGQONELWNECELAELNSDYVSNRTL</a>     |                       |
| 5.8   | 3992.7740 | -0.0046 | <a href="#">WEQENLNLDPMLNSQSISGVTGTIMCPLDEVPEQK</a> |                       |
| 5.7   | 3992.7740 | -0.0046 | <a href="#">WEQENLNLDPMLNSQSISGVTGTIMCPLDEVPEQK</a> |                       |
| 4.8   | 3992.7740 | -0.0046 | <a href="#">WEQENLNLDPMLNSQSISGVTGTIMCPLDEVPEQK</a> |                       |

Mascot: <http://www.matrixscience.com/>

# MATRIX SCIENCE Mascot Search Results

## Peptide View

MS/MS Fragmentation of **EGDHEFLEVPEAQEDVEATFPVHQPGNYSCSYR**

Found in **M0R009** in **con\_Xumiprot\_HUMAN3**, M0R009\_HUMAN Alpha-1B-glycoprotein (Fragment) OS=Homo sapiens GN=A1BG PE=2 SV=1

Match to Query 28140: 3837.643296 from(960.418100,4+) intensity(25846.1465) rtinseconds(1983) scans(5049) index(2149)

Title: 111019\_Est\_ISCardio\_NMI\_YP\_G\_4Spectrum4375\_scans\_5049

Data file C:\mascot\20140703\_Tmgf\_1D\CSV\_UseAnalysis\MasterCSV\All\_Glyco\mgf\ptm\UC18ERLIC\_PTM\_35D.mgf

Click mouse within plot area to zoom in by factor of two about that point

Or, to Da

Label all possible matches Label matches used for scoring

Show Y-axis

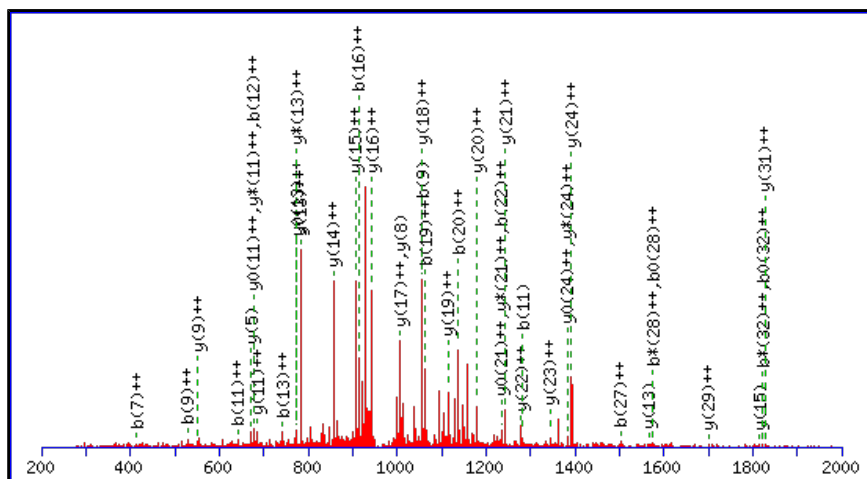

Monoisotopic mass of neutral peptide Mr(calc): 3837.6377

Fixed modifications: Carbamidomethyl (C) (apply to specified residues or termini only)

Variable modifications:

Q24 : Deamidated (NQ)

N27 : Deamidated (NQ)

Ions Score: 64 Expect: 2.3e-005

Matches : 44/356 fragment ions using 85 most intense peaks ([help](#))

| #  | b         | b <sup>++</sup> | b*        | b <sup>*++</sup> | b <sup>0</sup> | b <sup>0++</sup> | Seq. | y         | y <sup>++</sup> | y*        | y <sup>*++</sup> | y <sup>0</sup> | y <sup>0++</sup> | #  |
|----|-----------|-----------------|-----------|------------------|----------------|------------------|------|-----------|-----------------|-----------|------------------|----------------|------------------|----|
| 1  | 130.0499  | 65.5286         |           |                  | 112.0393       | 56.5233          | E    |           |                 |           |                  |                |                  | 33 |
| 2  | 187.0713  | 94.0393         |           |                  | 169.0608       | 85.0340          | G    | 3709.6024 | 1855.3048       | 3692.5758 | 1846.7915        | 3691.5918      | 1846.2995        | 32 |
| 3  | 302.0983  | 151.5528        |           |                  | 284.0877       | 142.5475         | D    | 3652.5809 | 1826.7941       | 3635.5544 | 1818.2808        | 3634.5703      | 1817.7888        | 31 |
| 4  | 439.1572  | 220.0822        |           |                  | 421.1466       | 211.0769         | H    | 3537.5540 | 1769.2806       | 3520.5274 | 1760.7673        | 3519.5434      | 1760.2753        | 30 |
| 5  | 568.1998  | 284.6035        |           |                  | 550.1892       | 275.5982         | E    | 3400.4950 | 1700.7512       | 3383.4685 | 1692.2379        | 3382.4845      | 1691.7459        | 29 |
| 6  | 715.2682  | 358.1377        |           |                  | 697.2576       | 349.1325         | F    | 3271.4525 | 1636.2299       | 3254.4259 | 1627.7166        | 3253.4419      | 1627.2246        | 28 |
| 7  | 828.3523  | 414.6798        |           |                  | 810.3417       | 405.6745         | L    | 3124.3840 | 1562.6957       | 3107.3575 | 1554.1824        | 3106.3735      | 1553.6904        | 27 |
| 8  | 957.3949  | 479.2011        |           |                  | 939.3843       | 470.1958         | E    | 3011.3000 | 1506.1536       | 2994.2734 | 1497.6404        | 2993.2894      | 1497.1483        | 26 |
| 9  | 1056.4633 | 528.7353        |           |                  | 1038.4527      | 519.7300         | V    | 2882.2574 | 1441.6323       | 2865.2308 | 1433.1191        | 2864.2468      | 1432.6270        | 25 |
| 10 | 1153.5160 | 577.2617        |           |                  | 1135.5055      | 568.2564         | P    | 2783.1890 | 1392.0981       | 2766.1624 | 1383.5848        | 2765.1784      | 1383.0928        | 24 |
| 11 | 1282.5586 | 641.7829        |           |                  | 1264.5481      | 632.7777         | E    | 2686.1362 | 1343.5717       | 2669.1097 | 1335.0585        | 2668.1256      | 1334.5665        | 23 |
| 12 | 1353.5957 | 677.3015        |           |                  | 1335.5852      | 668.2962         | A    | 2557.0936 | 1279.0504       | 2540.0671 | 1270.5372        | 2539.0830      | 1270.0452        | 22 |
| 13 | 1481.6543 | 741.3308        | 1464.6278 | 732.8175         | 1463.6438      | 732.3255         | Q    | 2486.0565 | 1243.5319       | 2469.0299 | 1235.0186        | 2468.0459      | 1234.5266        | 21 |
| 14 | 1610.6969 | 805.8521        | 1593.6704 | 797.3388         | 1592.6863      | 796.8468         | E    | 2357.9979 | 1179.5026       | 2340.9714 | 1170.9893        | 2339.9874      | 1170.4973        | 20 |
| 15 | 1725.7239 | 863.3656        | 1708.6973 | 854.8523         | 1707.7133      | 854.3603         | D    | 2228.9553 | 1114.9813       | 2211.9288 | 1106.4680        | 2210.9448      | 1105.9760        | 19 |
| 16 | 1824.7923 | 912.8998        | 1807.7657 | 904.3865         | 1806.7817      | 903.8945         | V    | 2113.9284 | 1057.4678       | 2096.9018 | 1048.9546        | 2095.9178      | 1048.4625        | 18 |
| 17 | 1953.8349 | 977.4211        | 1936.8083 | 968.9078         | 1935.8243      | 968.4158         | E    | 2014.8600 | 1007.9336       | 1997.8334 | 999.4203         | 1996.8494      | 998.9283         | 17 |
| 18 | 2024.8720 | 1012.9396       | 2007.8454 | 1004.4263        | 2006.8614      | 1003.9343        | A    | 1885.8174 | 943.4123        | 1868.7908 | 934.8991         | 1867.8068      | 934.4070         | 16 |
| 19 | 2125.9197 | 1063.4635       | 2108.8931 | 1054.9502        | 2107.9091      | 1054.4582        | T    | 1814.7803 | 907.8938        | 1797.7537 | 899.3805         | 1796.7697      | 898.8885         | 15 |
| 20 | 2272.9881 | 1136.9977       | 2255.9615 | 1128.4844        | 2254.9775      | 1127.9924        | F    | 1713.7326 | 857.3699        | 1696.7060 | 848.8567         | 1695.7220      | 848.3646         | 14 |
| 21 | 2370.0408 | 1185.5241       | 2353.0143 | 1177.0108        | 2352.0303      | 1176.5188        | P    | 1566.6642 | 783.8357        | 1549.6376 | 775.3224         | 1548.6536      | 774.8304         | 13 |

|    |           |                  |           |                  |           |                  |   |                  |                 |           |                 |           |                 |    |
|----|-----------|------------------|-----------|------------------|-----------|------------------|---|------------------|-----------------|-----------|-----------------|-----------|-----------------|----|
| 22 | 2469.1092 | <b>1235.0583</b> | 2452.0827 | 1226.5450        | 2451.0987 | 1226.0530        | V | 1469.6114        | 735.3093        | 1452.5849 | 726.7961        | 1451.6008 | 726.3041        | 12 |
| 23 | 2606.1682 | 1303.5877        | 2589.1416 | 1295.0744        | 2588.1576 | 1294.5824        | H | 1370.5430        | <b>685.7751</b> | 1353.5164 | <b>677.2619</b> | 1352.5324 | <b>676.7699</b> | 11 |
| 24 | 2735.2107 | 1368.1090        | 2718.1842 | 1359.5957        | 2717.2002 | 1359.1037        | Q | 1233.4841        | 617.2457        | 1216.4575 | 608.7324        | 1215.4735 | 608.2404        | 10 |
| 25 | 2832.2635 | 1416.6354        | 2815.2370 | 1408.1221        | 2814.2529 | 1407.6301        | P | 1104.4415        | <b>552.7244</b> | 1087.4149 | 544.2111        | 1086.4309 | 543.7191        | 9  |
| 26 | 2889.2850 | 1445.1461        | 2872.2584 | 1436.6329        | 2871.2744 | 1436.1408        | G | <b>1007.3887</b> | 504.1980        | 990.3622  | 495.6847        | 989.3782  | 495.1927        | 8  |
| 27 | 3004.3119 | <b>1502.6596</b> | 2987.2854 | 1494.1463        | 2986.3014 | 1493.6543        | N | 950.3673         | 475.6873        | 933.3407  | 467.1740        | 932.3567  | 466.6820        | 7  |
| 28 | 3167.3752 | 1584.1913        | 3150.3487 | <b>1575.6780</b> | 3149.3647 | <b>1575.1860</b> | Y | 835.3403         | 418.1738        | 818.3138  | 409.6605        | 817.3298  | 409.1685        | 6  |
| 29 | 3254.4073 | 1627.7073        | 3237.3807 | 1619.1940        | 3236.3967 | 1618.7020        | S | <b>672.2770</b>  | 336.6421        | 655.2504  | 328.1289        | 654.2664  | 327.6368        | 5  |
| 30 | 3414.4379 | 1707.7226        | 3397.4114 | 1699.2093        | 3396.4274 | 1698.7173        | C | 585.2450         | 293.1261        | 568.2184  | 284.6128        | 567.2344  | 284.1208        | 4  |
| 31 | 3501.4700 | 1751.2386        | 3484.4434 | 1742.7253        | 3483.4594 | 1742.2333        | S | 425.2143         | 213.1108        | 408.1878  | 204.5975        | 407.2037  | 204.1055        | 3  |
| 32 | 3664.5333 | 1832.7703        | 3647.5067 | <b>1824.2570</b> | 3646.5227 | <b>1823.7650</b> | Y | 338.1823         | 169.5948        | 321.1557  | 161.0815        |           |                 | 2  |
| 33 |           |                  |           |                  |           |                  | R | 175.1190         | 88.0631         | 158.0924  | 79.5498         |           |                 | 1  |

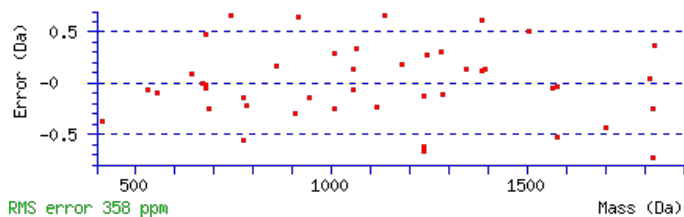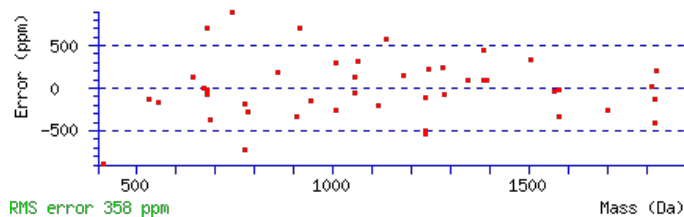

NCBI BLAST search of [EGDHEFLEVPEAQEDVEATFPVHQPGRNYSCSYR](#)

(Parameters: blastp, nr protein database, expect=20000, no filter, PAM30)

Other BLAST [web gateways](#)

All matches to this query

| Score | Mr(calc)  | Delta   | Sequence                                           | Site Analysis              |
|-------|-----------|---------|----------------------------------------------------|----------------------------|
| 64.1  | 3837.6377 | 0.0056  | <a href="#">EGDHEFLEVPEAQEDVEATFPVHQPGRNYSCSYR</a> | Deamidated Q24, N27 75.21% |
| 57.4  | 3837.6377 | 0.0056  | <a href="#">EGDHEFLEVPEAQEDVEATFPVHQPGRNYSCSYR</a> | Deamidated Q13, N27 15.79% |
| 54.9  | 3837.6377 | 0.0056  | <a href="#">EGDHEFLEVPEAQEDVEATFPVHQPGRNYSCSYR</a> | Deamidated Q13, Q24 9.00%  |
| 47.2  | 3836.6537 | 0.9896  | <a href="#">EGDHEFLEVPEAQEDVEATFPVHQPGRNYSCSYR</a> |                            |
| 45.6  | 3836.6537 | 0.9896  | <a href="#">EGDHEFLEVPEAQEDVEATFPVHQPGRNYSCSYR</a> |                            |
| 34.8  | 3836.6537 | 0.9896  | <a href="#">EGDHEFLEVPEAQEDVEATFPVHQPGRNYSCSYR</a> |                            |
| 3.1   | 3836.6540 | 0.9893  | <a href="#">HLQGMLDMVTLGWYIGSMRLYESMCYEYDDK</a>    |                            |
| 3.1   | 3836.6540 | 0.9893  | <a href="#">HLQGMLDMVTLGWYIGSMRLYESMCYEYDDK</a>    |                            |
| 1.9   | 3837.6439 | -0.0006 | <a href="#">DCVRQTYANSENMCHGNAICIAHGPNPYHMINR</a>  |                            |
| 1.5   | 3837.6523 | -0.0090 | <a href="#">DTQQGMYDAVLHVGDFAYNLDQDNARVGDREMR</a>  |                            |

Mascot: <http://www.matrixscience.com/>

# MATRIX SCIENCE Mascot Search Results

## Peptide View

MS/MS Fragmentation of **VVINSNITPICLPR**

Found in **O00187** in **con\_Xuniprot\_HUMAN3**, MASP2\_HUMAN Mannan-binding lectin serine protease 2 OS=Homo sapiens  
GN=MASP2 PE=1 SV=4

Match to Query 7655: 1595.873008 from(798.943780,2+) intensity(43672.8945) rtinseconds(1621) scans(4222) index(4407)  
Title: 111019\_Est\_ISCardio\_NMI\_YP\_G\_7Spectrum3582\_scans\_\_4222  
Data file C:\\mascot\\20140703\_Tmgf\_1D\\CSV\_UseAnalysis\\MasterCSV\\All\_Glyco\\mgf\\ptm\\UC18ERLIC\_PTM\_35D.mgf

Click mouse within plot area to zoom in by factor of two about that point

Or, to Da  
Label all possible matches Label matches used for scoring  
Show Y-axis

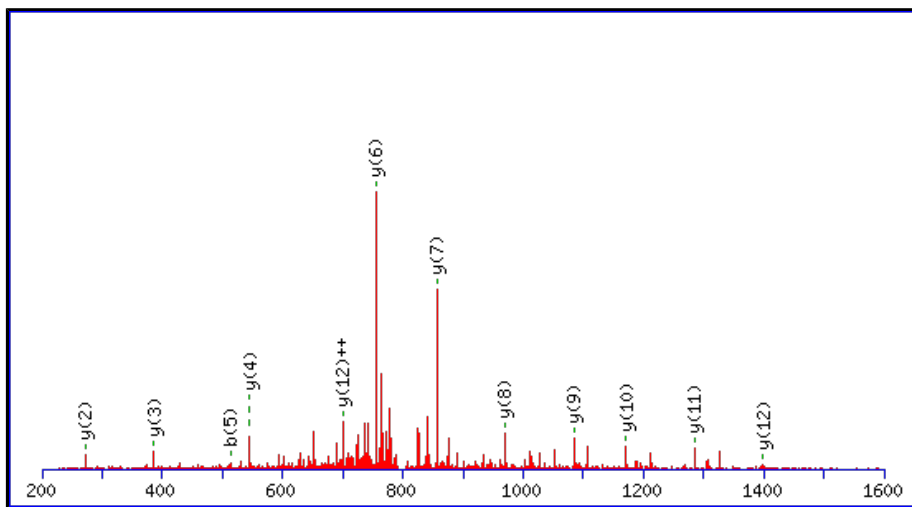

**Monoisotopic mass of neutral peptide Mr(calc):** 1595.8705  
**Fixed modifications:** Carbamidomethyl (C) (apply to specified residues or termini only)  
**Variable modifications:**  
N6 : Deamidated (NQ)  
**Ions Score:** 85 **Expect:** 3.8e-007  
**Matches :** 12/130 fragment ions using 14 most intense peaks ([help](#))

| #  | b               | b <sup>++</sup> | b <sup>*</sup> | b <sup>+++</sup> | b <sup>0</sup> | b <sup>0++</sup> | Seq. | y                | y <sup>++</sup> | y <sup>*</sup> | y <sup>+++</sup> | y <sup>0</sup> | y <sup>0++</sup> | #  |
|----|-----------------|-----------------|----------------|------------------|----------------|------------------|------|------------------|-----------------|----------------|------------------|----------------|------------------|----|
| 1  | 100.0757        | 50.5415         |                |                  |                |                  | V    |                  |                 |                |                  |                |                  | 14 |
| 2  | 199.1441        | 100.0757        |                |                  |                |                  | V    | 1497.8094        | 749.4083        | 1480.7828      | 740.8951         | 1479.7988      | 740.4030         | 13 |
| 3  | 312.2282        | 156.6177        |                |                  |                |                  | I    | <b>1398.7410</b> | <b>699.8741</b> | 1381.7144      | 691.3608         | 1380.7304      | 690.8688         | 12 |
| 4  | 426.2711        | 213.6392        | 409.2445       | 205.1259         |                |                  | N    | <b>1285.6569</b> | 643.3321        | 1268.6303      | 634.8188         | 1267.6463      | 634.3268         | 11 |
| 5  | <b>513.3031</b> | 257.1552        | 496.2766       | 248.6419         | 495.2926       | 248.1499         | S    | <b>1171.6140</b> | 586.3106        | 1154.5874      | 577.7973         | 1153.6034      | 577.3053         | 10 |
| 6  | 628.3301        | 314.6687        | 611.3035       | 306.1554         | 610.3195       | 305.6634         | N    | <b>1084.5819</b> | 542.7946        | 1067.5554      | 534.2813         | 1066.5714      | 533.7893         | 9  |
| 7  | 741.4141        | 371.2107        | 724.3876       | 362.6974         | 723.4036       | 362.2054         | I    | <b>969.5550</b>  | 485.2811        | 952.5285       | 476.7679         | 951.5444       | 476.2759         | 8  |
| 8  | 842.4618        | 421.7345        | 825.4353       | 413.2213         | 824.4512       | 412.7293         | T    | <b>856.4709</b>  | 428.7391        | 839.4444       | 420.2258         | 838.4604       | 419.7338         | 7  |
| 9  | 939.5146        | 470.2609        | 922.4880       | 461.7477         | 921.5040       | 461.2556         | P    | <b>755.4233</b>  | 378.2153        | 738.3967       | 369.7020         |                |                  | 6  |
| 10 | 1052.5986       | 526.8030        | 1035.5721      | 518.2897         | 1034.5881      | 517.7977         | I    | 658.3705         | 329.6889        | 641.3439       | 321.1756         |                |                  | 5  |
| 11 | 1212.6293       | 606.8183        | 1195.6027      | 598.3050         | 1194.6187      | 597.8130         | C    | <b>545.2864</b>  | 273.1469        | 528.2599       | 264.6336         |                |                  | 4  |
| 12 | 1325.7134       | 663.3603        | 1308.6868      | 654.8470         | 1307.7028      | 654.3550         | L    | <b>385.2558</b>  | 193.1315        | 368.2292       | 184.6183         |                |                  | 3  |
| 13 | 1422.7661       | 711.8867        | 1405.7396      | 703.3734         | 1404.7555      | 702.8814         | P    | <b>272.1717</b>  | 136.5895        | 255.1452       | 128.0762         |                |                  | 2  |
| 14 |                 |                 |                |                  |                |                  | R    | 175.1190         | 88.0631         | 158.0924       | 79.5498          |                |                  | 1  |

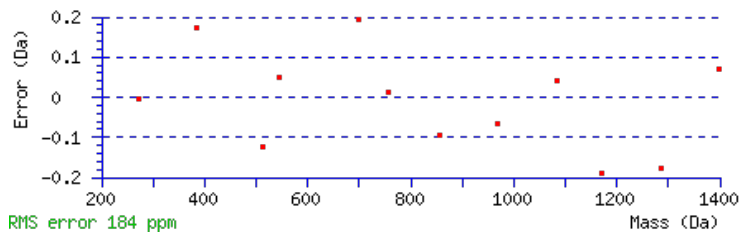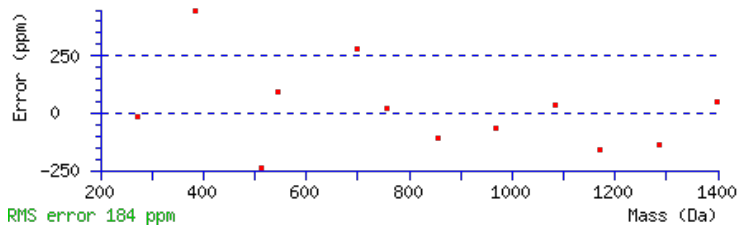

NCBI **BLAST** search of [VVINSNITPICLPR](#)

(Parameters: blastp, nr protein database, expect=20000, no filter, PAM30)

Other BLAST [web gateways](#)

**All matches to this query**

| Score | Mr(calc)  | Delta   | Sequence                         | Site Analysis        |
|-------|-----------|---------|----------------------------------|----------------------|
| 85.2  | 1595.8705 | 0.0025  | <a href="#">VVINSNITPICLPR</a>   | Deamidated N6 97.87% |
| 68.6  | 1595.8705 | 0.0025  | <a href="#">VVINSNITPICLPR</a>   | Deamidated N4 2.13%  |
| 1.0   | 1595.8671 | 0.0059  | <a href="#">ENLDHILPTIGSLR</a>   |                      |
| 0.9   | 1595.8770 | -0.0040 | <a href="#">AAEVSSLPPSIVLDAK</a> |                      |
| 0.9   | 1595.8671 | 0.0059  | <a href="#">SALPEWASPQKLIR</a>   |                      |

**Mascot:** <http://www.matrixscience.com/>

# MATRIX SCIENCE Mascot Search Results

## Peptide View

MS/MS Fragmentation of **ISNSSDTVECESENWK**

Found in **O75882** in **con\_Xuniprot\_HUMAN3**, ATRN\_HUMAN Attractin OS=Homo sapiens GN=ATRN PE=1 SV=2

Match to Query 13078: 2044.804908 from(1023.409730,2+) intensity(0.0000) rtinseconds(585) scans(1381) index(19349)

Title: 111019\_Est\_MI\_YP\_G\_09Spectrum1209\_scans\_\_1381

Data file C:\\mascot\\20140703\_Tmgf\_1D\\CSV\_UseAnalysis\\MasterCSV\\All\_Glyco\\mgf\\ptm\\UC18ERLIC\_PTM\_35D.mgf

Click mouse within plot area to zoom in by factor of two about that point

Or, to Da

Label all possible matches Label matches used for scoring

Show Y-axis

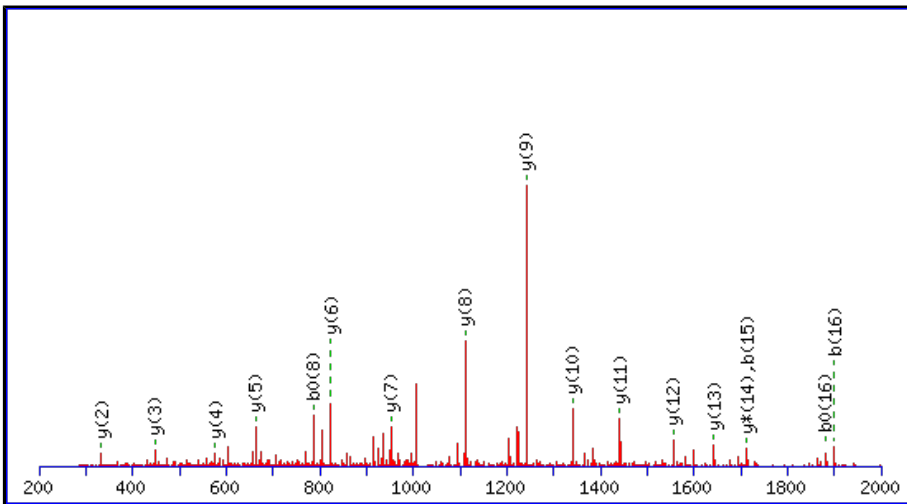

Monoisotopic mass of neutral peptide Mr(calc): 2044.7990

Fixed modifications: Carbamidomethyl (C) (apply to specified residues or termini only)

Variable modifications:

N3 : Deamidated (NQ)

Ions Score: 121 Expect: 1.2e-011

Matches : 17/180 fragment ions using 18 most intense peaks ([help](#))

| #  | b         | b <sup>++</sup> | b <sup>*</sup> | b <sup>*++</sup> | b <sup>0</sup> | b <sup>0++</sup> | Seq. | y         | y <sup>++</sup> | y <sup>*</sup> | y <sup>*++</sup> | y <sup>0</sup> | y <sup>0++</sup> | #  |
|----|-----------|-----------------|----------------|------------------|----------------|------------------|------|-----------|-----------------|----------------|------------------|----------------|------------------|----|
| 1  | 114.0913  | 57.5493         |                |                  |                |                  | I    |           |                 |                |                  |                |                  | 17 |
| 2  | 201.1234  | 101.0653        |                |                  | 183.1128       | 92.0600          | S    | 1932.7222 | 966.8647        | 1915.6957      | 958.3515         | 1914.7116      | 957.8595         | 16 |
| 3  | 316.1503  | 158.5788        | 299.1238       | 150.0655         | 298.1397       | 149.5735         | N    | 1845.6902 | 923.3487        | 1828.6636      | 914.8355         | 1827.6796      | 914.3434         | 15 |
| 4  | 403.1823  | 202.0948        | 386.1558       | 193.5815         | 385.1718       | 193.0895         | S    | 1730.6632 | 865.8353        | 1713.6367      | 857.3220         | 1712.6527      | 856.8300         | 14 |
| 5  | 490.2144  | 245.6108        | 473.1878       | 237.0975         | 472.2038       | 236.6055         | S    | 1643.6312 | 822.3192        | 1626.6047      | 813.8060         | 1625.6206      | 813.3140         | 13 |
| 6  | 605.2413  | 303.1243        | 588.2148       | 294.6110         | 587.2307       | 294.1190         | D    | 1556.5992 | 778.8032        | 1539.5726      | 770.2900         | 1538.5886      | 769.7979         | 12 |
| 7  | 706.2890  | 353.6481        | 689.2624       | 345.1349         | 688.2784       | 344.6429         | T    | 1441.5722 | 721.2898        | 1424.5457      | 712.7765         | 1423.5617      | 712.2845         | 11 |
| 8  | 805.3574  | 403.1823        | 788.3309       | 394.6691         | 787.3468       | 394.1771         | V    | 1340.5246 | 670.7659        | 1323.4980      | 662.2526         | 1322.5140      | 661.7606         | 10 |
| 9  | 934.4000  | 467.7036        | 917.3734       | 459.1904         | 916.3894       | 458.6984         | E    | 1241.4561 | 621.2317        | 1224.4296      | 612.7184         | 1223.4456      | 612.2264         | 9  |
| 10 | 1094.4306 | 547.7190        | 1077.4041      | 539.2057         | 1076.4201      | 538.7137         | C    | 1112.4136 | 556.7104        | 1095.3870      | 548.1971         | 1094.4030      | 547.7051         | 8  |
| 11 | 1223.4732 | 612.2403        | 1206.4467      | 603.7270         | 1205.4627      | 603.2350         | E    | 952.3829  | 476.6951        | 935.3564       | 468.1818         | 934.3723       | 467.6898         | 7  |
| 12 | 1383.5039 | 692.2556        | 1366.4773      | 683.7423         | 1365.4933      | 683.2503         | C    | 823.3403  | 412.1738        | 806.3138       | 403.6605         | 805.3297       | 403.1685         | 6  |
| 13 | 1470.5359 | 735.7716        | 1453.5094      | 727.2583         | 1452.5253      | 726.7663         | S    | 663.3097  | 332.1585        | 646.2831       | 323.6452         | 645.2991       | 323.1532         | 5  |
| 14 | 1599.5785 | 800.2929        | 1582.5520      | 791.7796         | 1581.5679      | 791.2876         | E    | 576.2776  | 288.6425        | 559.2511       | 280.1292         | 558.2671       | 279.6372         | 4  |
| 15 | 1713.6214 | 857.3144        | 1696.5949      | 848.8011         | 1695.6109      | 848.3091         | N    | 447.2350  | 224.1212        | 430.2085       | 215.6079         |                |                  | 3  |
| 16 | 1899.7007 | 950.3540        | 1882.6742      | 941.8407         | 1881.6902      | 941.3487         | W    | 333.1921  | 167.0997        | 316.1656       | 158.5864         |                |                  | 2  |
| 17 |           |                 |                |                  |                |                  | K    | 147.1128  | 74.0600         | 130.0863       | 65.5468          |                |                  | 1  |



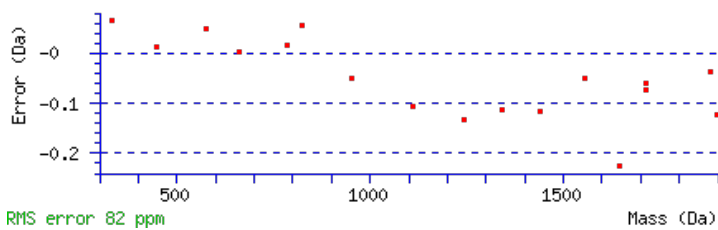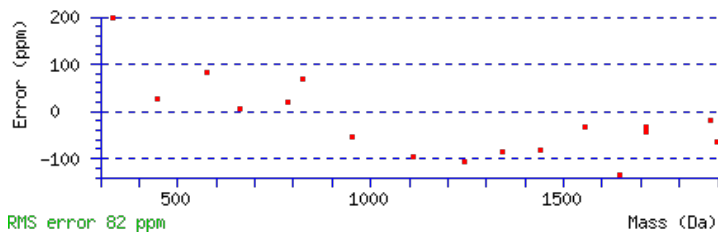

NCBI **BLAST** search of [ISNSSDTVECECSENWK](#)

(Parameters: blastp, nr protein database, expect=20000, no filter, PAM30)

Other BLAST [web gateways](#)

**All matches to this query**

| Score | Mr(calc)  | Delta  | Sequence                           | Site Analysis         |
|-------|-----------|--------|------------------------------------|-----------------------|
| 120.6 | 2044.7990 | 0.0059 | <a href="#">ISNSSDTVECECSENWK</a>  | Deamidated N3 100.00% |
| 40.2  | 2044.7990 | 0.0059 | <a href="#">ISNSSDTVECECSENWK</a>  | Deamidated N15 0.00%  |
| 0.7   | 2043.8037 | 1.0012 | <a href="#">QDSNEEDQGGNKPMYAMK</a> |                       |
| 0.7   | 2043.8037 | 1.0012 | <a href="#">QDSNEEDQGGNKPMYAMK</a> |                       |

Mascot: <http://www.matrixscience.com/>



# MASCOT SCIENCE Mascot Search Results

## Peptide View

MS/MS Fragmentation of **GCSCFSDWQGP GCSVPVPANQSFWTR**

Found in **075882** in **con\_Xuniprot\_HUMAN3**, ATRN\_HUMAN Attractin OS=Homo sapiens GN=ATRN PE=1 SV=2

Match to Query 27089: 2987.243968 from(1494.629260,2+) intensity(9965.8467) rtinseconds(2045) scans(5353) index(19786)

Title: 111019\_Est\_ML\_YP\_G\_09Spectrum4727\_scans\_\_5353

Data file C:\mascot\20140703\_Tmgf\_1D\CSV\_UseAnalysis\MasterCSV\All\_Glyco\mgf\ptm\UC18ERLIC\_PTM\_35D.mgf

Click mouse within plot area to zoom in by factor of two about that point

Or, to Da

Label all possible matches Label matches used for scoring

Show Y-axis

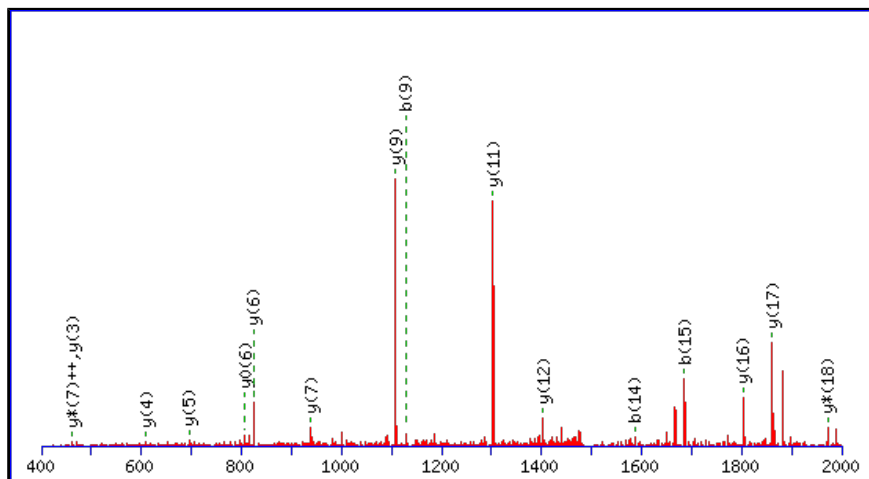

Monoisotopic mass of neutral peptide Mr(calc): 2987.2426

Fixed modifications: Carbamidomethyl (C) (apply to specified residues or termini only)

Variable modifications:

N20 : Deamidated (NQ)

Ions Score: 85 Expect: 1.1e-007

Matches : 16/278 fragment ions using 16 most intense peaks ([help](#))

| #  | b                | b <sup>++</sup> | b <sup>*</sup> | b <sup>*++</sup> | b <sup>0</sup> | b <sup>0++</sup> | Seq. | y                | y <sup>++</sup> | y <sup>*</sup>   | y <sup>*++</sup> | y <sup>0</sup>  | y <sup>0++</sup> | #  |
|----|------------------|-----------------|----------------|------------------|----------------|------------------|------|------------------|-----------------|------------------|------------------|-----------------|------------------|----|
| 1  | 58.0287          | 29.5180         |                |                  |                |                  | G    |                  |                 |                  |                  |                 |                  | 26 |
| 2  | 218.0594         | 109.5333        |                |                  |                |                  | C    | 2931.2283        | 1466.1178       | 2914.2018        | 1457.6045        | 2913.2178       | 1457.1125        | 25 |
| 3  | 305.0914         | 153.0493        |                |                  | 287.0809       | 144.0441         | S    | 2771.1977        | 1386.1025       | 2754.1711        | 1377.5892        | 2753.1871       | 1377.0972        | 24 |
| 4  | 465.1221         | 233.0647        |                |                  | 447.1115       | 224.0594         | C    | 2684.1657        | 1342.5865       | 2667.1391        | 1334.0732        | 2666.1551       | 1333.5812        | 23 |
| 5  | 612.1905         | 306.5989        |                |                  | 594.1799       | 297.5936         | F    | 2524.1350        | 1262.5711       | 2507.1085        | 1254.0579        | 2506.1245       | 1253.5659        | 22 |
| 6  | 699.2225         | 350.1149        |                |                  | 681.2119       | 341.1096         | S    | 2377.0666        | 1189.0369       | 2360.0401        | 1180.5237        | 2359.0560       | 1180.0317        | 21 |
| 7  | 814.2495         | 407.6284        |                |                  | 796.2389       | 398.6231         | D    | 2290.0346        | 1145.5209       | 2273.0080        | 1137.0077        | 2272.0240       | 1136.5156        | 20 |
| 8  | 1000.3288        | 500.6680        |                |                  | 982.3182       | 491.6627         | W    | 2175.0076        | 1088.0075       | 2157.9811        | 1079.4942        | 2156.9971       | 1079.0022        | 19 |
| 9  | <b>1128.3873</b> | 564.6973        | 1111.3608      | 556.1840         | 1110.3768      | 555.6920         | Q    | 1988.9283        | 994.9678        | <b>1971.9018</b> | 986.4545         | 1970.9178       | 985.9625         | 18 |
| 10 | 1185.4088        | 593.2080        | 1168.3823      | 584.6948         | 1167.3982      | 584.2028         | G    | <b>1860.8697</b> | 930.9385        | 1843.8432        | 922.4252         | 1842.8592       | 921.9332         | 17 |
| 11 | 1282.4616        | 641.7344        | 1265.4350      | 633.2211         | 1264.4510      | 632.7291         | P    | <b>1803.8483</b> | 902.4278        | 1786.8217        | 893.9145         | 1785.8377       | 893.4225         | 16 |
| 12 | 1339.4830        | 670.2452        | 1322.4565      | 661.7319         | 1321.4725      | 661.2399         | G    | 1706.7955        | 853.9014        | 1689.7690        | 845.3881         | 1688.7850       | 844.8961         | 15 |
| 13 | 1499.5137        | 750.2605        | 1482.4871      | 741.7472         | 1481.5031      | 741.2552         | C    | 1649.7741        | 825.3907        | 1632.7475        | 816.8774         | 1631.7635       | 816.3854         | 14 |
| 14 | <b>1586.5457</b> | 793.7765        | 1569.5192      | 785.2632         | 1568.5351      | 784.7712         | S    | 1489.7434        | 745.3753        | 1472.7169        | 736.8621         | 1471.7328       | 736.3701         | 13 |
| 15 | <b>1685.6141</b> | 843.3107        | 1668.5876      | 834.7974         | 1667.6036      | 834.3054         | V    | <b>1402.7114</b> | 701.8593        | 1385.6848        | 693.3461         | 1384.7008       | 692.8540         | 12 |
| 16 | 1782.6669        | 891.8371        | 1765.6403      | 883.3238         | 1764.6563      | 882.8318         | P    | <b>1303.6430</b> | 652.3251        | 1286.6164        | 643.8118         | 1285.6324       | 643.3198         | 11 |
| 17 | 1881.7353        | 941.3713        | 1864.7088      | 932.8580         | 1863.7247      | 932.3660         | V    | 1206.5902        | 603.7987        | 1189.5637        | 595.2855         | 1188.5796       | 594.7935         | 10 |
| 18 | 1978.7881        | 989.8977        | 1961.7615      | 981.3844         | 1960.7775      | 980.8924         | P    | <b>1107.5218</b> | 554.2645        | 1090.4952        | 545.7513         | 1089.5112       | 545.2592         | 9  |
| 19 | 2049.8252        | 1025.4162       | 2032.7986      | 1016.9030        | 2031.8146      | 1016.4109        | A    | 1010.4690        | 505.7381        | 993.4425         | 497.2249         | 992.4585        | 496.7329         | 8  |
| 20 | 2164.8521        | 1082.9297       | 2147.8256      | 1074.4164        | 2146.8416      | 1073.9244        | N    | <b>939.4319</b>  | 470.2196        | 922.4054         | <b>461.7063</b>  | 921.4213        | 461.2143         | 7  |
| 21 | 2292.9107        | 1146.9590       | 2275.8842      | 1138.4457        | 2274.9001      | 1137.9537        | Q    | <b>824.4050</b>  | 412.7061        | 807.3784         | 404.1928         | <b>806.3944</b> | 403.7008         | 6  |
| 22 | 2379.9427        | 1190.4750       | 2362.9162      | 1181.9617        | 2361.9322      | 1181.4697        | S    | <b>696.3464</b>  | 348.6768        | 679.3198         | 340.1636         | 678.3358        | 339.6715         | 5  |
| 23 | 2527.0111        | 1264.0092       | 2509.9846      | 1255.4959        | 2509.0006      | 1255.0039        | F    | <b>609.3144</b>  | 305.1608        | 592.2878         | 296.6475         | 591.3038        | 296.1555         | 4  |

|    |           |           |           |           |           |           |   |          |          |          |          |          |          |   |
|----|-----------|-----------|-----------|-----------|-----------|-----------|---|----------|----------|----------|----------|----------|----------|---|
| 24 | 2713.0905 | 1357.0489 | 2696.0639 | 1348.5356 | 2695.0799 | 1348.0436 | W | 462.2459 | 231.6266 | 445.2194 | 223.1133 | 444.2354 | 222.6213 | 3 |
| 25 | 2814.1381 | 1407.5727 | 2797.1116 | 1399.0594 | 2796.1276 | 1398.5674 | T | 276.1666 | 138.5870 | 259.1401 | 130.0737 | 258.1561 | 129.5817 | 2 |
| 26 |           |           |           |           |           |           | R | 175.1190 | 88.0631  | 158.0924 | 79.5498  |          |          | 1 |

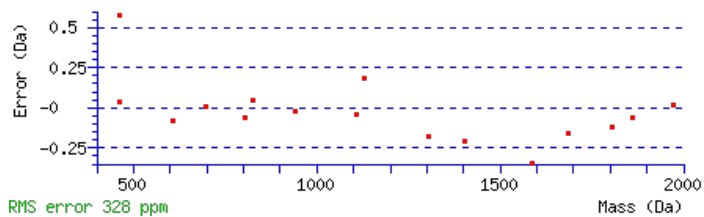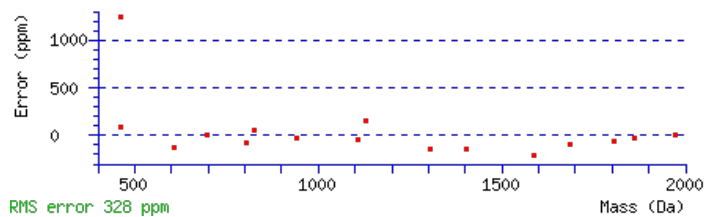

NCBI BLAST search of [GCSCFSDWQGPGCSVPVPANQSFWTR](#)  
 (Parameters: blastp, nr protein database, expect=20000, no filter, PAM30)  
 Other BLAST [web gateways](#)

All matches to this query

| Score | Mr(calc)  | Delta  | Sequence                                   | Site Analysis         |
|-------|-----------|--------|--------------------------------------------|-----------------------|
| 85.0  | 2987.2426 | 0.0014 | <a href="#">GCSCFSDWQGPGCSVPVPANQSFWTR</a> | Deamidated N20 99.07% |
| 64.7  | 2987.2426 | 0.0014 | <a href="#">GCSCFSDWQGPGCSVPVPANQSFWTR</a> | Deamidated Q21 0.93%  |
| 17.0  | 2987.2426 | 0.0014 | <a href="#">GCSCFSDWQGPGCSVPVPANQSFWTR</a> | Deamidated Q9 0.00%   |

Mascot: <http://www.matrixscience.com/>

# MASCOT SCIENCE Mascot Search Results

## Peptide View

MS/MS Fragmentation of **IDSTGNVTNELR**

Found in **O75882** in **con\_Xuniprot\_HUMAN3**, ATRN\_HUMAN Attractin OS=Homo sapiens GN=ATRN PE=1 SV=2

Match to Query 2015: 1318.642328 from(660.328440,2+) intensity(8168.3721) rtinseconds(663) scans(1397) index(1896)

Title: 111019\_Est\_ISCardio\_NMI\_YP\_G\_4Spectrum1149\_scans\_\_1397

Data file C:\mascot\20140703\_Tmgf\_1D\CSV\_UseAnalysis\MasterCSV\All\_Glyco\mgf\ptm\UC18ERLIC\_PTM\_35D.mgf

Click mouse within plot area to zoom in by factor of two about that point

Or, to Da

Label all possible matches Label matches used for scoring

Show Y-axis

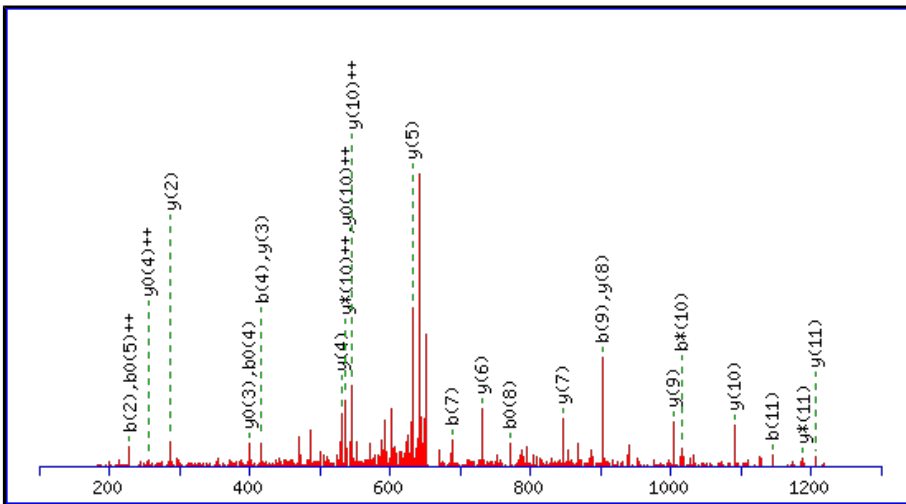

Monoisotopic mass of neutral peptide Mr(calc): 1318.6365

Fixed modifications: Carbamidomethyl (C) (apply to specified residues or termini only)

Variable modifications:

N6 : Deamidated (NQ)

Ions Score: 79 Expect: 2.6e-006

Matches : 25/116 fragment ions using 33 most intense peaks ([help](#))

| #  | b                | b <sup>++</sup> | b <sup>*</sup>   | b <sup>*++</sup> | b <sup>0</sup>  | b <sup>0++</sup> | Seq. | y                | y <sup>++</sup> | y <sup>*</sup>   | y <sup>*++</sup> | y <sup>0</sup>  | y <sup>0++</sup> | #  |
|----|------------------|-----------------|------------------|------------------|-----------------|------------------|------|------------------|-----------------|------------------|------------------|-----------------|------------------|----|
| 1  | 114.0913         | 57.5493         |                  |                  |                 |                  | I    |                  |                 |                  |                  |                 |                  | 12 |
| 2  | <b>229.1183</b>  | 115.0628        |                  |                  | 211.1077        | 106.0575         | D    | <b>1206.5597</b> | 603.7835        | <b>1189.5331</b> | 595.2702         | 1188.5491       | 594.7782         | 11 |
| 3  | 316.1503         | 158.5788        |                  |                  | 298.1397        | 149.5735         | S    | <b>1091.5327</b> | <b>546.2700</b> | 1074.5062        | <b>537.7567</b>  | 1073.5222       | <b>537.2647</b>  | 10 |
| 4  | <b>417.1980</b>  | 209.1026        |                  |                  | <b>399.1874</b> | 200.0974         | T    | <b>1004.5007</b> | 502.7540        | 987.4742         | 494.2407         | 986.4901        | 493.7487         | 9  |
| 5  | 474.2195         | 237.6134        |                  |                  | 456.2089        | <b>228.6081</b>  | G    | <b>903.4530</b>  | 452.2302        | 886.4265         | 443.7169         | 885.4425        | 443.2249         | 8  |
| 6  | 589.2464         | 295.1268        | 572.2198         | 286.6136         | 571.2358        | 286.1216         | N    | <b>846.4316</b>  | 423.7194        | 829.4050         | 415.2061         | 828.4210        | 414.7141         | 7  |
| 7  | <b>688.3148</b>  | 344.6610        | 671.2883         | 336.1478         | 670.3042        | 335.6558         | V    | <b>731.4046</b>  | 366.2060        | 714.3781         | 357.6927         | 713.3941        | 357.2007         | 6  |
| 8  | 789.3625         | 395.1849        | 772.3359         | 386.6716         | <b>771.3519</b> | 386.1796         | T    | <b>632.3362</b>  | 316.6717        | 615.3097         | 308.1585         | 614.3256        | 307.6665         | 5  |
| 9  | <b>903.4054</b>  | 452.2063        | 886.3789         | 443.6931         | 885.3949        | 443.2011         | N    | <b>531.2885</b>  | 266.1479        | 514.2620         | 257.6346         | 513.2780        | <b>257.1426</b>  | 4  |
| 10 | 1032.4480        | 516.7276        | <b>1015.4215</b> | 508.2144         | 1014.4374       | 507.7224         | E    | <b>417.2456</b>  | 209.1264        | 400.2191         | 200.6132         | <b>399.2350</b> | 200.1212         | 3  |
| 11 | <b>1145.5321</b> | 573.2697        | 1128.5055        | 564.7564         | 1127.5215       | 564.2644         | L    | <b>288.2030</b>  | 144.6051        | 271.1765         | 136.0919         |                 |                  | 2  |
| 12 |                  |                 |                  |                  |                 |                  | R    | 175.1190         | 88.0631         | 158.0924         | 79.5498          |                 |                  | 1  |

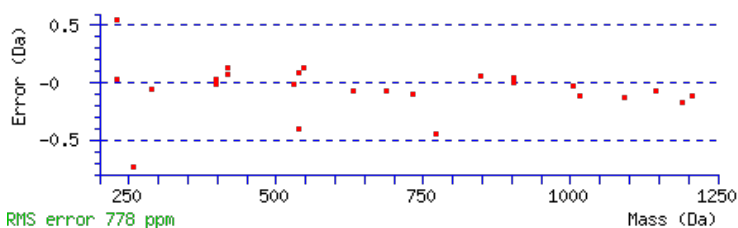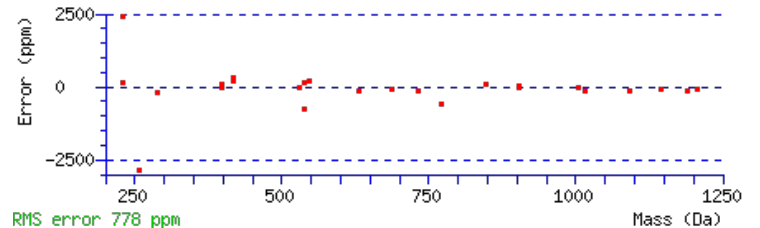

NCBI **BLAST** search of [IDSTGNVTNELR](#)

(Parameters: blastp, nr protein database, expect=20000, no filter, PAM30)

Other BLAST [web gateways](#)

**All matches to this query**

| Score | Mr(calc)  | Delta   | Sequence                     | Site Analysis        |
|-------|-----------|---------|------------------------------|----------------------|
| 79.2  | 1318.6365 | 0.0059  | <a href="#">IDSTGNVTNELR</a> | Deamidated N6 99.05% |
| 59.0  | 1318.6365 | 0.0059  | <a href="#">IDSTGNVTNELR</a> | Deamidated N9 0.95%  |
| 23.7  | 1318.6365 | 0.0059  | <a href="#">TSNLQGSVDQLR</a> |                      |
| 21.5  | 1318.6365 | 0.0059  | <a href="#">TSNLQGSVDQLR</a> |                      |
| 17.5  | 1318.6365 | 0.0059  | <a href="#">TSNLQGSVDQLR</a> |                      |
| 12.8  | 1318.6364 | 0.0059  | <a href="#">LNNTSQKGLEGR</a> |                      |
| 12.0  | 1317.6347 | 1.0076  | <a href="#">QSQAICVGGIER</a> |                      |
| 11.3  | 1317.6347 | 1.0076  | <a href="#">QSQAICVGGIER</a> |                      |
| 9.8   | 1318.6477 | -0.0054 | <a href="#">GQQQSDTSSLLR</a> |                      |
| 9.4   | 1318.6405 | 0.0019  | <a href="#">NLNPVFNETLR</a>  |                      |

**Mascot:** <http://www.matrixscience.com/>

# MATRIX SCIENCE Mascot Search Results

## Peptide View

MS/MS Fragmentation of **MPSQAPTGNFYQPQLLNSSMCLEDSR**

Found in **O75882** in **con\_Xuniprot\_HUMAN3**, ATRN\_HUMAN Attractin OS=Homo sapiens GN=ATRN PE=1 SV=2

Match to Query 27062: 2972.310852 from(991.777560,3+) intensity(18014.0879) rtinseconds(1679) scans(4201) index(5313)

Title: 111019\_Est\_ISCardio\_NMI\_YP\_G\_8Spectrum3673\_scans\_\_4201

Data file C:\mascot\20140703\_Tmgf\_1D\CSV\_UseAnalysis\MasterCSV\All\_Glyco\mgf\ptm\UC18ERLIC\_PTM\_35D.mgf

Click mouse within plot area to zoom in by factor of two about that point

Or,  to  Da

Label all possible matches  Label matches used for scoring

Show Y-axis

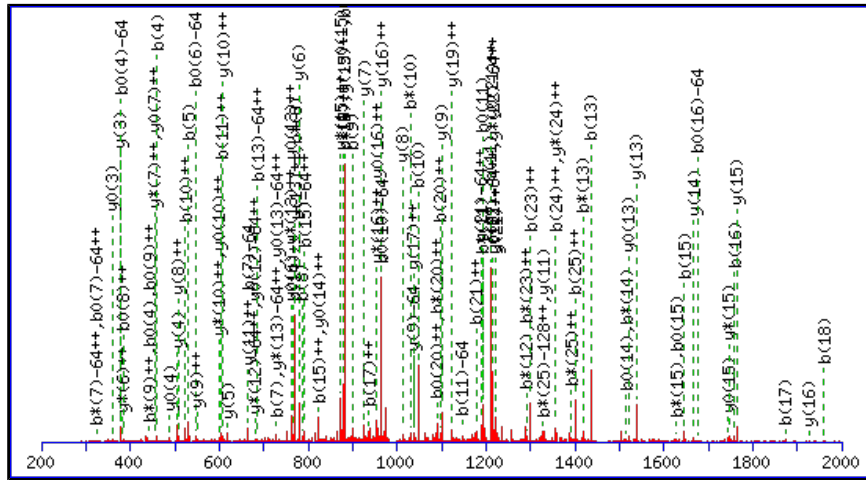

Monoisotopic mass of neutral peptide Mr(calc): 2972.2990

Fixed modifications: Carbamidomethyl (C) (apply to specified residues or termini only)

Variable modifications:

M1 : Oxidation (M), with neutral losses 0.0000(shown in table), 63.9983

N17 : Deamidated (NQ)

M20 : Oxidation (M), with neutral losses 0.0000(shown in table), 63.9983

Ions Score: 55 Expect: 0.00031

Matches : 105/542 fragment ions using 171 most intense peaks ([help](#))

| #  | b                | b <sup>++</sup>  | b <sup>*</sup>   | b <sup>*++</sup> | b <sup>0</sup>   | b <sup>0++</sup> | Seq. | y                | y <sup>++</sup>  | y <sup>*</sup>   | y <sup>*++</sup> | y <sup>0</sup>   | y <sup>0++</sup> | #  |
|----|------------------|------------------|------------------|------------------|------------------|------------------|------|------------------|------------------|------------------|------------------|------------------|------------------|----|
| 1  | 148.0427         | 74.5250          |                  |                  |                  |                  | M    |                  |                  |                  |                  |                  |                  | 26 |
| 2  | 245.0954         | 123.0514         |                  |                  |                  |                  | P    | 2826.2709        | 1413.6391        | 2809.2444        | 1405.1258        | 2808.2604        | 1404.6338        | 25 |
| 3  | 332.1275         | 166.5674         |                  |                  | 314.1169         | 157.5621         | S    | 2729.2182        | 1365.1127        | 2712.1916        | 1356.5994        | 2711.2076        | 1356.1074        | 24 |
| 4  | <b>460.1860</b>  | 230.5967         | 443.1595         | 222.0834         | <b>442.1755</b>  | 221.5914         | Q    | 2642.1861        | 1321.5967        | 2625.1596        | 1313.0834        | 2624.1756        | 1312.5914        | 23 |
| 5  | <b>531.2232</b>  | 266.1152         | 514.1966         | 257.6019         | 513.2126         | 257.1099         | A    | 2514.1276        | 1257.5674        | 2497.1010        | 1249.0541        | 2496.1170        | 1248.5621        | 22 |
| 6  | 628.2759         | 314.6416         | 611.2494         | 306.1283         | 610.2654         | 305.6363         | P    | 2443.0904        | <b>1222.0489</b> | 2426.0639        | 1213.5356        | 2425.0799        | <b>1213.0436</b> | 21 |
| 7  | <b>729.3236</b>  | 365.1654         | 712.2971         | 356.6522         | 711.3130         | 356.1602         | T    | 2346.0377        | 1173.5225        | 2329.0111        | 1165.0092        | 2328.0271        | 1164.5172        | 20 |
| 8  | <b>786.3451</b>  | 393.6762         | <b>769.3185</b>  | 385.1629         | 768.3345         | <b>384.6709</b>  | G    | 2244.9900        | <b>1122.9986</b> | 2227.9634        | 1114.4854        | 2226.9794        | 1113.9934        | 19 |
| 9  | <b>900.3880</b>  | 450.6976         | <b>883.3614</b>  | <b>442.1844</b>  | <b>882.3774</b>  | <b>441.6924</b>  | N    | 2187.9685        | 1094.4879        | 2170.9420        | 1085.9746        | 2169.9580        | 1085.4826        | 18 |
| 10 | <b>1047.4564</b> | <b>524.2318</b>  | <b>1030.4299</b> | 515.7186         | 1029.4458        | 515.2266         | F    | 2073.9256        | <b>1037.4664</b> | 2056.8991        | 1028.9532        | 2055.9150        | 1028.4612        | 17 |
| 11 | <b>1210.5197</b> | <b>605.7635</b>  | <b>1193.4932</b> | 597.2502         | <b>1192.5092</b> | 596.7582         | Y    | <b>1926.8572</b> | <b>963.9322</b>  | 1909.8306        | <b>955.4190</b>  | 1908.8466        | <b>954.9270</b>  | 16 |
| 12 | 1307.5725        | 654.2899         | <b>1290.5460</b> | 645.7766         | 1289.5619        | 645.2846         | P    | <b>1763.7939</b> | <b>882.4006</b>  | <b>1746.7673</b> | <b>873.8873</b>  | <b>1745.7833</b> | <b>873.3953</b>  | 15 |
| 13 | <b>1435.6311</b> | 718.3192         | <b>1418.6045</b> | 709.8059         | 1417.6205        | 709.3139         | Q    | <b>1666.7411</b> | 833.8742         | 1649.7145        | 825.3609         | 1648.7305        | <b>824.8689</b>  | 14 |
| 14 | 1532.6838        | <b>766.8456</b>  | <b>1515.6573</b> | 758.3323         | <b>1514.6733</b> | 757.8403         | P    | <b>1538.6825</b> | <b>769.8449</b>  | 1521.6560        | <b>761.3316</b>  | <b>1520.6720</b> | <b>760.8396</b>  | 13 |
| 15 | <b>1645.7679</b> | <b>823.3876</b>  | <b>1628.7414</b> | 814.8743         | <b>1627.7573</b> | 814.3823         | L    | 1441.6298        | 721.3185         | 1424.6032        | 712.8052         | 1423.6192        | 712.3132         | 12 |
| 16 | <b>1758.8520</b> | <b>879.9296</b>  | 1741.8254        | 871.4163         | 1740.8414        | 870.9243         | L    | <b>1328.5457</b> | <b>664.7765</b>  | 1311.5191        | 656.2632         | 1310.5351        | 655.7712         | 11 |
| 17 | <b>1873.8789</b> | <b>937.4431</b>  | 1856.8524        | 928.9298         | 1855.8683        | 928.4378         | N    | <b>1215.4616</b> | <b>608.2345</b>  | 1198.4351        | <b>599.7212</b>  | 1197.4511        | <b>599.2292</b>  | 10 |
| 18 | <b>1960.9109</b> | 980.9591         | 1943.8844        | 972.4458         | 1942.9004        | 971.9538         | S    | <b>1100.4347</b> | <b>550.7210</b>  | 1083.4081        | 542.2077         | 1082.4241        | 541.7157         | 9  |
| 19 | 2047.9430        | 1024.4751        | 2030.9164        | 1015.9618        | 2029.9324        | 1015.4698        | S    | <b>1013.4027</b> | <b>507.2050</b>  | 996.3761         | 498.6917         | 995.3921         | 498.1997         | 8  |
| 20 | 2194.9784        | <b>1097.9928</b> | 2177.9518        | <b>1089.4795</b> | 2176.9678        | <b>1088.9875</b> | M    | <b>926.3706</b>  | 463.6890         | 909.3441         | <b>455.1757</b>  | 908.3601         | <b>454.6837</b>  | 7  |
| 21 | 2355.0090        | <b>1178.0081</b> | 2337.9825        | 1169.4949        | 2336.9985        | 1169.0029        | C    | <b>779.3352</b>  | 390.1713         | 762.3087         | <b>381.6580</b>  | <b>761.3247</b>  | 381.1660         | 6  |
| 22 | 2468.0931        | 1234.5502        | 2451.0665        | 1226.0369        | 2450.0825        | 1225.5449        | L    | <b>619.3046</b>  | 310.1559         | 602.2780         | 301.6427         | 601.2940         | 301.1506         | 5  |

|    |           |                  |           |                  |           |           |          |                 |          |          |          |                 |          |          |
|----|-----------|------------------|-----------|------------------|-----------|-----------|----------|-----------------|----------|----------|----------|-----------------|----------|----------|
| 23 | 2597.1357 | <b>1299.0715</b> | 2580.1091 | <b>1290.5582</b> | 2579.1251 | 1290.0662 | <b>E</b> | <b>506.2205</b> | 253.6139 | 489.1940 | 245.1006 | <b>488.2100</b> | 244.6086 | <b>4</b> |
| 24 | 2712.1626 | <b>1356.5849</b> | 2695.1361 | 1348.0717        | 2694.1521 | 1347.5797 | <b>D</b> | <b>377.1779</b> | 189.0926 | 360.1514 | 180.5793 | <b>359.1674</b> | 180.0873 | <b>3</b> |
| 25 | 2799.1946 | <b>1400.1010</b> | 2782.1681 | <b>1391.5877</b> | 2781.1841 | 1391.0957 | <b>S</b> | 262.1510        | 131.5791 | 245.1244 | 123.0659 | 244.1404        | 122.5738 | <b>2</b> |
| 26 |           |                  |           |                  |           |           | <b>R</b> | 175.1190        | 88.0631  | 158.0924 | 79.5498  |                 |          | <b>1</b> |

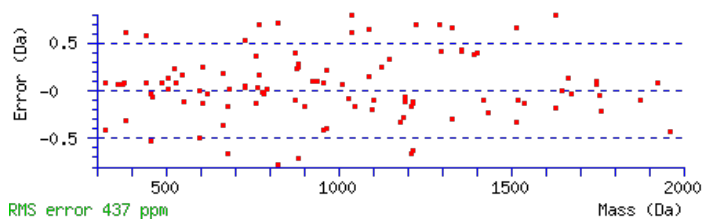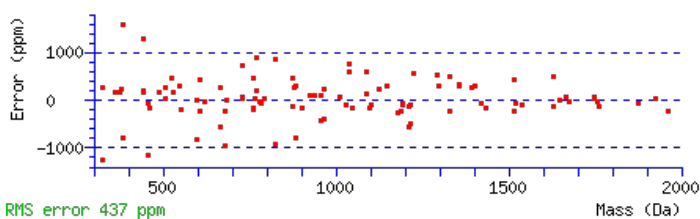

NCBI **BLAST** search of [MPSQAPTGNFYPOPLLNSSMCLEDSR](#)  
 (Parameters: blastp, nr protein database, expect=20000, no filter, PAM30)  
 Other BLAST [web gateways](#)

**All matches to this query**

| Score | Mr(calc)  | Delta  | Sequence                                    | Site Analysis         |
|-------|-----------|--------|---------------------------------------------|-----------------------|
| 55.5  | 2972.2990 | 0.0118 | <a href="#">MPSQAPTGNFYPOPLLNSSMCLEDSR</a>  | Deamidated N17 45.69% |
| 53.8  | 2972.2990 | 0.0118 | <a href="#">MPSQAPTGNFYPOPLLNSSMCLEDSR</a>  | Deamidated N9 30.61%  |
| 52.3  | 2972.2990 | 0.0118 | <a href="#">MPSQAPTGNFYPOPLLNSSMCLEDSR</a>  | Deamidated Q13 21.92% |
| 45.2  | 2971.3150 | 0.9958 | <a href="#">MPSQAPTGNFYPOPLLNSSMCLEDSR</a>  |                       |
| 41.4  | 2972.2990 | 0.0118 | <a href="#">MPSQAPTGNFYPOPLLNSSMCLEDSR</a>  | Deamidated Q4 1.79%   |
| 12.6  | 2971.3105 | 1.0004 | <a href="#">HSAGNSMLIPMSVTMETSMIMSNIQR</a>  |                       |
| 4.3   | 2972.3015 | 0.0093 | <a href="#">MNNGDVDLTSDRYSMVGGNLVINNPDK</a> |                       |
| 4.0   | 2972.3015 | 0.0093 | <a href="#">MNNGDVDLTSDRYSMVGGNLVINNPDK</a> |                       |
| 4.0   | 2972.3015 | 0.0093 | <a href="#">MNNGDVDLTSDRYSMVGGNLVINNPDK</a> |                       |
| 3.7   | 2972.3015 | 0.0093 | <a href="#">MNNGDVDLTSDRYSMVGGNLVINNPDK</a> |                       |

Mascot: <http://www.matrixscience.com/>

# MATRIX SCIENCE Mascot Search Results

## Peptide View

MS/MS Fragmentation of **GPVKMPSQAPTGNFYQPQLLNSSMCLEDSR**

Found in **O75882** in **con\_Xuniprot\_HUMAN3**, ATRN\_HUMAN Attractin OS=Homo sapiens GN=ATRN PE=1 SV=2

Match to Query 27416: 3338.547582 from(1113.856470,3+) intensity(19385.6973) rtinseconds(1788) scans(4497) index(2076)

Title: 111019\_Est\_ISCardio\_NMI\_YP\_G\_4Spectrum3892\_scans\_\_4497

Data file C:\mascot\20140703\_Tmgf\_1D\CSV\_UseAnalysis\MasterCSV\All\_Glyco\mgf\ptm\UC18ERLIC\_PTM\_35D.mgf

Click mouse within plot area to zoom in by factor of two about that point

Or, to Da

Label all possible matches Label matches used for scoring

Show Y-axis

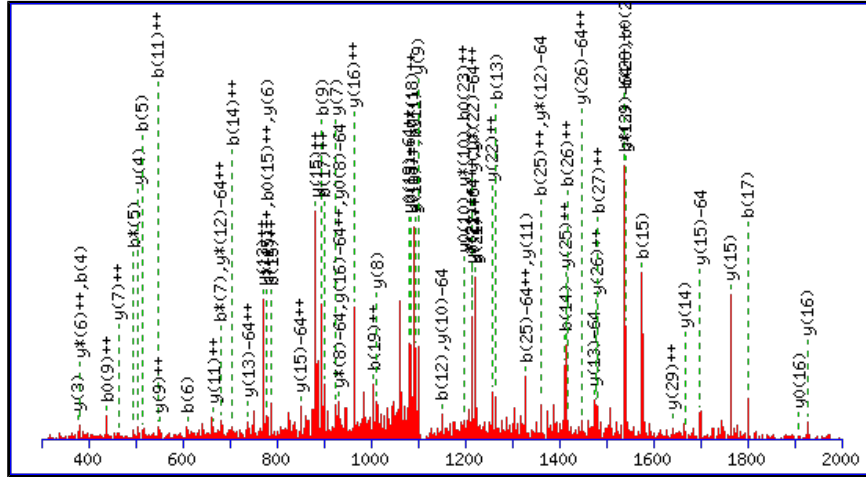

Monoisotopic mass of neutral peptide Mr(calc): 3337.5417

Fixed modifications: Carbamidomethyl (C) (apply to specified residues or termini only)

Variable modifications:

N21 : Deamidated (NQ)

M24 : Oxidation (M), with neutral losses 0.0000(shown in table), 63.9983

Ions Score: 54 Expect: 0.00078

Matches : 73/502 fragment ions using 119 most intense peaks ([help](#))

| #  | b                | b <sup>++</sup>  | b*              | b <sup>*++</sup> | b <sup>0</sup> | b <sup>0++</sup> | Seq. | y                | y <sup>++</sup>  | y*               | y <sup>*++</sup> | y <sup>0</sup>   | y <sup>0++</sup> | #  |
|----|------------------|------------------|-----------------|------------------|----------------|------------------|------|------------------|------------------|------------------|------------------|------------------|------------------|----|
| 1  | 58.0287          | 29.5180          |                 |                  |                |                  | G    |                  |                  |                  |                  |                  |                  | 30 |
| 2  | 155.0815         | 78.0444          |                 |                  |                |                  | P    | 3281.5275        | 1641.2674        | 3264.5010        | 1632.7541        | 3263.5170        | 1632.2621        | 29 |
| 3  | 254.1499         | 127.5786         |                 |                  |                |                  | V    | 3184.4748        | 1592.7410        | 3167.4482        | 1584.2278        | 3166.4642        | 1583.7357        | 28 |
| 4  | <b>382.2449</b>  | 191.6261         | 365.2183        | 183.1128         |                |                  | K    | 3085.4064        | 1543.2068        | 3068.3798        | 1534.6935        | 3067.3958        | 1534.2015        | 27 |
| 5  | <b>513.2854</b>  | 257.1463         | <b>496.2588</b> | 248.6330         |                |                  | M    | 2957.3114        | <b>1479.1593</b> | 2940.2849        | 1470.6461        | 2939.3008        | 1470.1541        | 26 |
| 6  | <b>610.3381</b>  | 305.6727         | 593.3116        | 297.1594         |                |                  | P    | 2826.2709        | <b>1413.6391</b> | 2809.2444        | 1405.1258        | 2808.2604        | 1404.6338        | 25 |
| 7  | 697.3702         | 349.1887         | <b>680.3436</b> | 340.6754         | 679.3596       | 340.1834         | S    | 2729.2182        | 1365.1127        | 2712.1916        | 1356.5994        | 2711.2076        | 1356.1074        | 24 |
| 8  | 825.4287         | 413.2180         | 808.4022        | 404.7047         | 807.4182       | 404.2127         | Q    | 2642.1861        | 1321.5967        | 2625.1596        | 1313.0834        | 2624.1756        | 1312.5914        | 23 |
| 9  | <b>896.4659</b>  | 448.7366         | 879.4393        | 440.2233         | 878.4553       | <b>439.7313</b>  | A    | 2514.1276        | <b>1257.5674</b> | 2497.1010        | 1249.0541        | 2496.1170        | 1248.5621        | 22 |
| 10 | 993.5186         | 497.2629         | 976.4921        | 488.7497         | 975.5080       | 488.2577         | P    | 2443.0904        | <b>1222.0489</b> | 2426.0639        | <b>1213.5356</b> | 2425.0799        | 1213.0436        | 21 |
| 11 | <b>1094.5663</b> | <b>547.7868</b>  | 1077.5397       | 539.2735         | 1076.5557      | 538.7815         | T    | 2346.0377        | 1173.5225        | 2329.0111        | 1165.0092        | 2328.0271        | 1164.5172        | 20 |
| 12 | <b>1151.5878</b> | 576.2975         | 1134.5612       | 567.7842         | 1133.5772      | 567.2922         | G    | 2244.9900        | 1122.9986        | 2227.9634        | 1114.4854        | 2226.9794        | 1113.9934        | 19 |
| 13 | <b>1265.6307</b> | 633.3190         | 1248.6041       | 624.8057         | 1247.6201      | 624.3137         | N    | 2187.9685        | <b>1094.4879</b> | 2170.9420        | <b>1085.9746</b> | 2169.9580        | <b>1085.4826</b> | 18 |
| 14 | <b>1412.6991</b> | <b>706.8532</b>  | 1395.6725       | 698.3399         | 1394.6885      | 697.8479         | F    | 2073.9256        | 1037.4664        | 2056.8991        | 1028.9532        | 2055.9150        | 1028.4612        | 17 |
| 15 | <b>1575.7624</b> | <b>788.3849</b>  | 1558.7359       | <b>779.8716</b>  | 1557.7519      | <b>779.3796</b>  | Y    | <b>1926.8572</b> | <b>963.9322</b>  | 1909.8306        | 955.4190         | <b>1908.8466</b> | 954.9270         | 16 |
| 16 | 1672.8152        | 836.9112         | 1655.7886       | 828.3980         | 1654.8046      | 827.9060         | P    | <b>1763.7939</b> | <b>882.4006</b>  | 1746.7673        | 873.8873         | 1745.7833        | 873.3953         | 15 |
| 17 | <b>1800.8738</b> | <b>900.9405</b>  | 1783.8472       | 892.4272         | 1782.8632      | 891.9352         | Q    | <b>1666.7411</b> | 833.8742         | 1649.7145        | 825.3609         | 1648.7305        | 824.8689         | 14 |
| 18 | 1897.9265        | 949.4669         | 1880.9000       | 940.9536         | 1879.9160      | 940.4616         | P    | <b>1538.6825</b> | <b>769.8449</b>  | 1521.6560        | 761.3316         | 1520.6720        | 760.8396         | 13 |
| 19 | 2011.0106        | <b>1006.0089</b> | 1993.9840       | 997.4957         | 1993.0000      | 997.0037         | L    | 1441.6298        | 721.3185         | 1424.6032        | 712.8052         | 1423.6192        | 712.3132         | 12 |
| 20 | 2124.0947        | 1062.5510        | 2107.0681       | 1054.0377        | 2106.0841      | 1053.5457        | L    | <b>1328.5457</b> | <b>664.7765</b>  | 1311.5191        | 656.2632         | 1310.5351        | 655.7712         | 11 |
| 21 | 2239.1216        | 1120.0644        | 2222.0951       | 1111.5512        | 2221.1110      | 1111.0592        | N    | <b>1215.4616</b> | 608.2345         | <b>1198.4351</b> | 599.7212         | <b>1197.4511</b> | 599.2292         | 10 |
| 22 | 2326.1536        | 1163.5805        | 2309.1271       | 1155.0672        | 2308.1431      | 1154.5752        | S    | <b>1100.4347</b> | <b>550.7210</b>  | 1083.4081        | 542.2077         | 1082.4241        | 541.7157         | 9  |



|    |           |           |           |           |           |           |   |           |          |          |          |          |          |   |
|----|-----------|-----------|-----------|-----------|-----------|-----------|---|-----------|----------|----------|----------|----------|----------|---|
| 23 | 2413.1857 | 1207.0965 | 2396.1591 | 1198.5832 | 2395.1751 | 1198.0912 | S | 1013.4027 | 507.2050 | 996.3761 | 498.6917 | 995.3921 | 498.1997 | 8 |
| 24 | 2560.2211 | 1280.6142 | 2543.1945 | 1272.1009 | 2542.2105 | 1271.6089 | M | 926.3706  | 463.6890 | 909.3441 | 455.1757 | 908.3601 | 454.6837 | 7 |
| 25 | 2720.2517 | 1360.6295 | 2703.2252 | 1352.1162 | 2702.2411 | 1351.6242 | C | 779.3352  | 390.1713 | 762.3087 | 381.6580 | 761.3247 | 381.1660 | 6 |
| 26 | 2833.3358 | 1417.1715 | 2816.3092 | 1408.6582 | 2815.3252 | 1408.1662 | L | 619.3046  | 310.1559 | 602.2780 | 301.6427 | 601.2940 | 301.1506 | 5 |
| 27 | 2962.3784 | 1481.6928 | 2945.3518 | 1473.1795 | 2944.3678 | 1472.6875 | E | 506.2205  | 253.6139 | 489.1940 | 245.1006 | 488.2100 | 244.6086 | 4 |
| 28 | 3077.4053 | 1539.2063 | 3060.3788 | 1530.6930 | 3059.3947 | 1530.2010 | D | 377.1779  | 189.0926 | 360.1514 | 180.5793 | 359.1674 | 180.0873 | 3 |
| 29 | 3164.4373 | 1582.7223 | 3147.4108 | 1574.2090 | 3146.4268 | 1573.7170 | S | 262.1510  | 131.5791 | 245.1244 | 123.0659 | 244.1404 | 122.5738 | 2 |
| 30 |           |           |           |           |           |           | R | 175.1190  | 88.0631  | 158.0924 | 79.5498  |          |          | 1 |

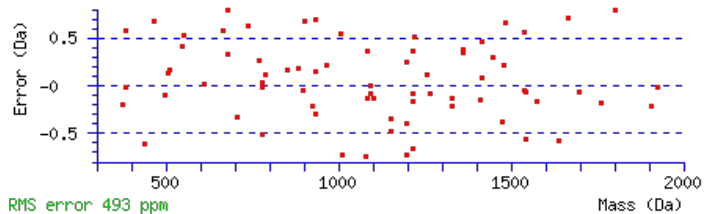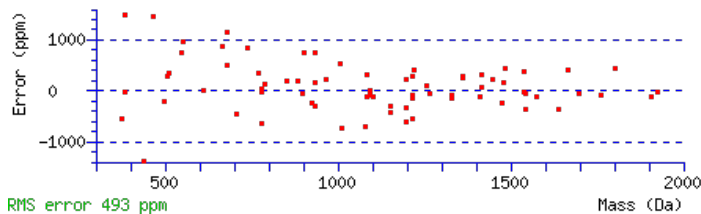

NCBI BLAST search of [GPVKMPSQAPTGNFYQPQLLNSSMCLEDSR](#)

(Parameters: blastp, nr protein database, expect=20000, no filter, PAM30)

Other BLAST [web gateways](#)

All matches to this query

| Score | Mr(calc)  | Delta   | Sequence                                       | Site Analysis                         |
|-------|-----------|---------|------------------------------------------------|---------------------------------------|
| 54.4  | 3337.5417 | 1.0059  | <a href="#">GPVKMPSQAPTGNFYQPQLLNSSMCLEDSR</a> | Deamidated N21, Oxidation M24; 59.49% |
| 51.3  | 3337.5417 | 1.0059  | <a href="#">GPVKMPSQAPTGNFYQPQLLNSSMCLEDSR</a> | Deamidated Q17, Oxidation M24; 29.40% |
| 46.0  | 3337.5417 | 1.0059  | <a href="#">GPVKMPSQAPTGNFYQPQLLNSSMCLEDSR</a> | Deamidated N13, Oxidation M24; 8.72%  |
| 40.4  | 3337.5417 | 1.0059  | <a href="#">GPVKMPSQAPTGNFYQPQLLNSSMCLEDSR</a> | Deamidated Q8, Oxidation M24; 2.39%   |
| 39.7  | 3336.5577 | 1.9899  | <a href="#">GPVKMPSQAPTGNFYQPQLLNSSMCLEDSR</a> |                                       |
| 6.5   | 3337.5555 | 0.9921  | <a href="#">AQLGTTLVHQFSEQSSINQIDMQLMDESR</a>  |                                       |
| 3.5   | 3338.5587 | -0.0111 | <a href="#">SASINGVDQLLEVDPMHYTEWLER YMDK</a>  |                                       |
| 2.1   | 3338.5395 | 0.0081  | <a href="#">AQLGTTLVHQFSEQSSINQIDMQLMDESR</a>  |                                       |
| 1.0   | 3336.5497 | 1.9979  | <a href="#">SGMDSDKWLYVQQENTFTDQTGELPTLSK</a>  |                                       |
| 1.0   | 3337.5554 | 0.9922  | <a href="#">SPSLSYFIQPD LHPAEDFPISIEFTEDDK</a> |                                       |

Mascot: <http://www.matrixscience.com/>



# MATRIX SCIENCE Mascot Search Results

## Peptide View

MS/MS Fragmentation of **CENLTTGKHCETCISGFYGDPTNGGK**

Found in **O75882** in **con\_Xuniprot\_HUMAN3**, ATRN\_HUMAN Attractin OS=Homo sapiens GN=ATRN PE=1 SV=2

Match to Query 26767: 2904.221616 from(727.062680,4+) intensity(0.0000) rtinseconds(982) scans(2272) index(3712)

Title: 111019\_Est\_ISCardio\_NMI\_YP\_G\_6Spectrum1932\_scans\_\_2272

Data file C:\mascot\20140703\_Tmgf\_1D\CSV\_UseAnalysis\MasterCSV\All\_Glyco\mgf\ptm\UC18ERLIC\_PTM\_35D.mgf

Click mouse within plot area to zoom in by factor of two about that point

Or, to Da

Label all possible matches Label matches used for scoring

Show Y-axis

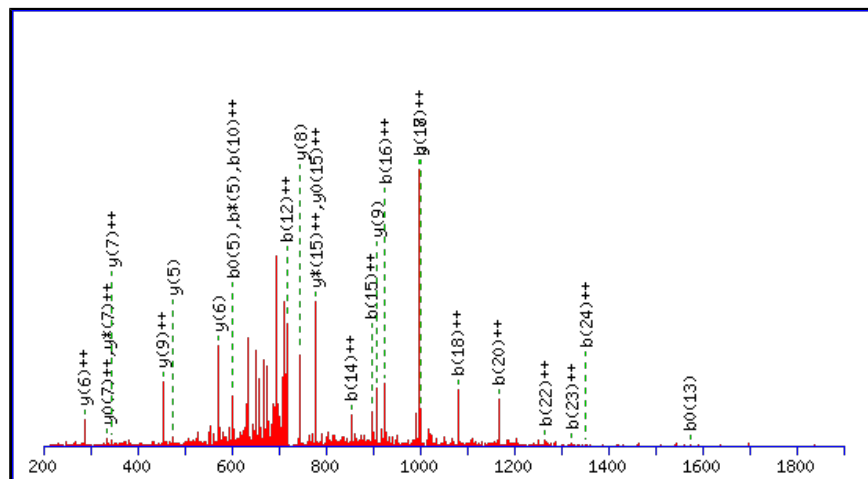

Monoisotopic mass of neutral peptide Mr(calc): 2903.2161

Fixed modifications: Carbamidomethyl (C) (apply to specified residues or termini only)

Variable modifications:

N3 : Deamidated (NQ)

Ions Score: 49 Expect: 0.00052

Matches : 26/286 fragment ions using 45 most intense peaks ([help](#))

| #  | b         | b <sup>++</sup> | b <sup>*</sup> | b <sup>*++</sup> | b <sup>0</sup> | b <sup>0++</sup> | Seq. | y         | y <sup>++</sup> | y <sup>*</sup> | y <sup>*++</sup> | y <sup>0</sup> | y <sup>0++</sup> | #  |
|----|-----------|-----------------|----------------|------------------|----------------|------------------|------|-----------|-----------------|----------------|------------------|----------------|------------------|----|
| 1  | 161.0379  | 81.0226         |                |                  |                |                  | C    |           |                 |                |                  |                |                  | 26 |
| 2  | 290.0805  | 145.5439        |                |                  | 272.0700       | 136.5386         | E    | 2744.1927 | 1372.6000       | 2727.1661      | 1364.0867        | 2726.1821      | 1363.5947        | 25 |
| 3  | 405.1075  | 203.0574        | 388.0809       | 194.5441         | 387.0969       | 194.0521         | N    | 2615.1501 | 1308.0787       | 2598.1235      | 1299.5654        | 2597.1395      | 1299.0734        | 24 |
| 4  | 518.1915  | 259.5994        | 501.1650       | 251.0861         | 500.1810       | 250.5941         | L    | 2500.1231 | 1250.5652       | 2483.0966      | 1242.0519        | 2482.1126      | 1241.5599        | 23 |
| 5  | 619.2392  | 310.1232        | 602.2127       | 301.6100         | 601.2286       | 301.1180         | T    | 2387.0391 | 1194.0232       | 2370.0125      | 1185.5099        | 2369.0285      | 1185.0179        | 22 |
| 6  | 720.2869  | 360.6471        | 703.2603       | 352.1338         | 702.2763       | 351.6418         | T    | 2285.9914 | 1143.4993       | 2268.9648      | 1134.9861        | 2267.9808      | 1134.4941        | 21 |
| 7  | 777.3083  | 389.1578        | 760.2818       | 380.6445         | 759.2978       | 380.1525         | G    | 2184.9437 | 1092.9755       | 2167.9172      | 1084.4622        | 2166.9332      | 1083.9702        | 20 |
| 8  | 905.4033  | 453.2053        | 888.3768       | 444.6920         | 887.3927       | 444.2000         | K    | 2127.9223 | 1064.4648       | 2110.8957      | 1055.9515        | 2109.9117      | 1055.4595        | 19 |
| 9  | 1042.4622 | 521.7347        | 1025.4357      | 513.2215         | 1024.4517      | 512.7295         | H    | 1999.8273 | 1000.4173       | 1982.8007      | 991.9040         | 1981.8167      | 991.4120         | 18 |
| 10 | 1202.4929 | 601.7501        | 1185.4663      | 593.2368         | 1184.4823      | 592.7448         | C    | 1862.7684 | 931.8878        | 1845.7418      | 923.3746         | 1844.7578      | 922.8825         | 17 |
| 11 | 1331.5355 | 666.2714        | 1314.5089      | 657.7581         | 1313.5249      | 657.2661         | E    | 1702.7377 | 851.8725        | 1685.7112      | 843.3592         | 1684.7272      | 842.8672         | 16 |
| 12 | 1432.5831 | 716.7952        | 1415.5566      | 708.2819         | 1414.5726      | 707.7899         | T    | 1573.6951 | 787.3512        | 1556.6686      | 778.8379         | 1555.6846      | 778.3459         | 15 |
| 13 | 1592.6138 | 796.8105        | 1575.5872      | 788.2973         | 1574.6032      | 787.8053         | C    | 1472.6475 | 736.8274        | 1455.6209      | 728.3141         | 1454.6369      | 727.8221         | 14 |
| 14 | 1705.6979 | 853.3526        | 1688.6713      | 844.8393         | 1687.6873      | 844.3473         | I    | 1312.6168 | 656.8120        | 1295.5903      | 648.2988         | 1294.6062      | 647.8068         | 13 |
| 15 | 1792.7299 | 896.8686        | 1775.7033      | 888.3553         | 1774.7193      | 887.8633         | S    | 1199.5327 | 600.2700        | 1182.5062      | 591.7567         | 1181.5222      | 591.2647         | 12 |
| 16 | 1849.7513 | 925.3793        | 1832.7248      | 916.8660         | 1831.7408      | 916.3740         | G    | 1112.5007 | 556.7540        | 1095.4742      | 548.2407         | 1094.4902      | 547.7487         | 11 |
| 17 | 1996.8198 | 998.9135        | 1979.7932      | 990.4002         | 1978.8092      | 989.9082         | F    | 1055.4793 | 528.2433        | 1038.4527      | 519.7300         | 1037.4687      | 519.2380         | 10 |
| 18 | 2159.8831 | 1080.4452       | 2142.8565      | 1071.9319        | 2141.8725      | 1071.4399        | Y    | 908.4108  | 454.7091        | 891.3843       | 446.1958         | 890.4003       | 445.7038         | 9  |
| 19 | 2216.9046 | 1108.9559       | 2199.8780      | 1100.4426        | 2198.8940      | 1099.9506        | G    | 745.3475  | 373.1774        | 728.3210       | 364.6641         | 727.3369       | 364.1721         | 8  |
| 20 | 2331.9315 | 1166.4694       | 2314.9049      | 1157.9561        | 2313.9209      | 1157.4641        | D    | 688.3260  | 344.6667        | 671.2995       | 336.1534         | 670.3155       | 335.6614         | 7  |
| 21 | 2428.9843 | 1214.9958       | 2411.9577      | 1206.4825        | 2410.9737      | 1205.9905        | P    | 573.2991  | 287.1532        | 556.2726       | 278.6399         | 555.2885       | 278.1479         | 6  |
| 22 | 2530.0319 | 1265.5196       | 2513.0054      | 1257.0063        | 2512.0214      | 1256.5143        | T    | 476.2463  | 238.6268        | 459.2198       | 230.1135         | 458.2358       | 229.6215         | 5  |
| 23 | 2644.0749 | 1322.5411       | 2627.0483      | 1314.0278        | 2626.0643      | 1313.5358        | N    | 375.1987  | 188.1030        | 358.1721       | 179.5897         |                |                  | 4  |

|    |           |                  |           |           |           |           |   |          |          |          |          |  |  |   |
|----|-----------|------------------|-----------|-----------|-----------|-----------|---|----------|----------|----------|----------|--|--|---|
| 24 | 2701.0963 | <b>1351.0518</b> | 2684.0698 | 1342.5385 | 2683.0858 | 1342.0465 | G | 261.1557 | 131.0815 | 244.1292 | 122.5682 |  |  | 3 |
| 25 | 2758.1178 | 1379.5625        | 2741.0912 | 1371.0493 | 2740.1072 | 1370.5573 | G | 204.1343 | 102.5708 | 187.1077 | 94.0575  |  |  | 2 |
| 26 |           |                  |           |           |           |           | K | 147.1128 | 74.0600  | 130.0863 | 65.5468  |  |  | 1 |

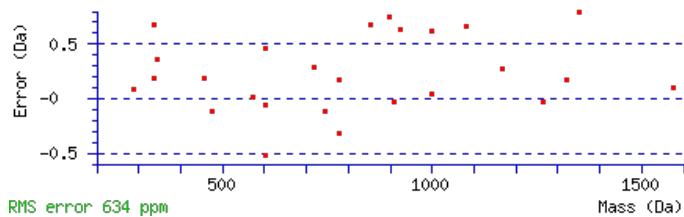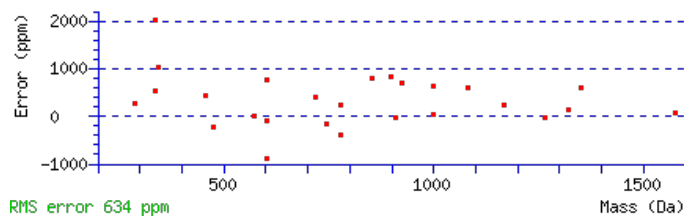

NCBI BLAST search of [CENLTTGKHCETCISGFYGDPTNGGK](#)  
 (Parameters: blastp, nr protein database, expect=20000, no filter, PAM30)  
 Other BLAST [web gateways](#)

All matches to this query

| Score | Mr(calc)  | Delta  | Sequence                                      | Site Analysis        |
|-------|-----------|--------|-----------------------------------------------|----------------------|
| 49.0  | 2903.2161 | 1.0056 | <a href="#">CENLTTGKHCETCISGFYGDPTNGGK</a>    | Deamidated N3 99.99% |
| 8.4   | 2904.2178 | 0.0038 | <a href="#">FMGEPEAEEDGGDGGQGGAVQPAEAVPMR</a> |                      |
| 6.6   | 2904.2178 | 0.0038 | <a href="#">FMGEPEAEEDGGDGGQGGAVQPAEAVPMR</a> |                      |
| 6.1   | 2903.2161 | 1.0056 | <a href="#">CENLTTGKHCETCISGFYGDPTNGGK</a>    | Deamidated N23 0.01% |
| 2.8   | 2903.2250 | 0.9966 | <a href="#">QVDGDNSHVEMKLA VDEEENADNNTK</a>   |                      |
| 0.3   | 2902.2169 | 2.0047 | <a href="#">ELCDPKKAMEEEYNMAVYCFSEK</a>       |                      |
| 0.3   | 2903.2281 | 0.9935 | <a href="#">RNMGGPPPCMGSGVQPPMNAMNPGYPR</a>   |                      |

Mascot: <http://www.matrixscience.com/>

# MASCOT SCIENCE Mascot Search Results

## Peptide View

MS/MS Fragmentation of **CINQSICEK**

Found in **075882** in **con\_Xuniprot\_HUMAN3**, ATRN\_HUMAN Attractin OS=Homo sapiens GN=ATRN PE=1 SV=2

Match to Query 1582: 1151.499408 from(576.756980,2+) intensity(3854.9431) rtinseconds(297) scans(582) index(6108)

Title: 111019\_Est\_ISCardio\_NMI\_YP\_G\_9Spectrum497\_scans\_\_582

Data file C:\\mascot\\20140703\_Tmgf\_1D\\CSV\_UseAnalysis\\MasterCSV\\All\_Glyco\\mgf\\ptm\\UC18ERLIC\_PTM\_35D.mgf

Click mouse within plot area to zoom in by factor of two about that point

Or, to Da

Label all possible matches Label matches used for scoring

Show Y-axis

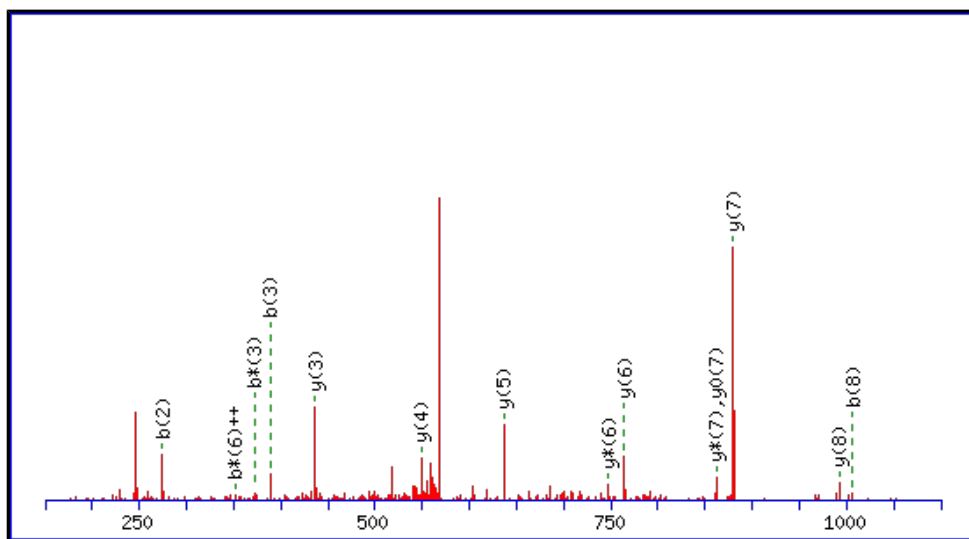

Monoisotopic mass of neutral peptide **Mr(calc)**: 1151.4951

**Fixed modifications:** Carbamidomethyl (C) (apply to specified residues or termini only)

**Variable modifications:**

N3 : Deamidated (NQ)

Ions Score: 48 Expect: 0.0013

Matches : 14/82 fragment ions using 18 most intense peaks ([help](#))

| # | b                | b <sup>++</sup> | b <sup>*</sup>  | b <sup>*++</sup> | b <sup>0</sup> | b <sup>0++</sup> | Seq. | y               | y <sup>++</sup> | y <sup>*</sup>  | y <sup>*++</sup> | y <sup>0</sup>  | y <sup>0++</sup> | # |
|---|------------------|-----------------|-----------------|------------------|----------------|------------------|------|-----------------|-----------------|-----------------|------------------|-----------------|------------------|---|
| 1 | 161.0379         | 81.0226         |                 |                  |                |                  | C    |                 |                 |                 |                  |                 |                  | 9 |
| 2 | <b>274.1220</b>  | 137.5646        |                 |                  |                |                  | I    | <b>992.4717</b> | 496.7395        | 975.4452        | 488.2262         | 974.4612        | 487.7342         | 8 |
| 3 | <b>389.1489</b>  | 195.0781        | <b>372.1224</b> | 186.5648         |                |                  | N    | <b>879.3877</b> | 440.1975        | <b>862.3611</b> | 431.6842         | <b>861.3771</b> | 431.1922         | 7 |
| 4 | 517.2075         | 259.1074        | 500.1810        | 250.5941         |                |                  | Q    | <b>764.3607</b> | 382.6840        | <b>747.3342</b> | 374.1707         | 746.3502        | 373.6787         | 6 |
| 5 | 604.2395         | 302.6234        | 587.2130        | 294.1101         | 586.2290       | 293.6181         | S    | <b>636.3021</b> | 318.6547        | 619.2756        | 310.1414         | 618.2916        | 309.6494         | 5 |
| 6 | 717.3236         | 359.1654        | 700.2971        | <b>350.6522</b>  | 699.3130       | 350.1602         | I    | <b>549.2701</b> | 275.1387        | 532.2436        | 266.6254         | 531.2595        | 266.1334         | 4 |
| 7 | 877.3543         | 439.1808        | 860.3277        | 430.6675         | 859.3437       | 430.1755         | C    | <b>436.1860</b> | 218.5967        | 419.1595        | 210.0834         | 418.1755        | 209.5914         | 3 |
| 8 | <b>1006.3968</b> | 503.7021        | 989.3703        | 495.1888         | 988.3863       | 494.6968         | E    | 276.1554        | 138.5813        | 259.1288        | 130.0681         | 258.1448        | 129.5761         | 2 |
| 9 |                  |                 |                 |                  |                |                  | K    | 147.1128        | 74.0600         | 130.0863        | 65.5468          |                 |                  | 1 |

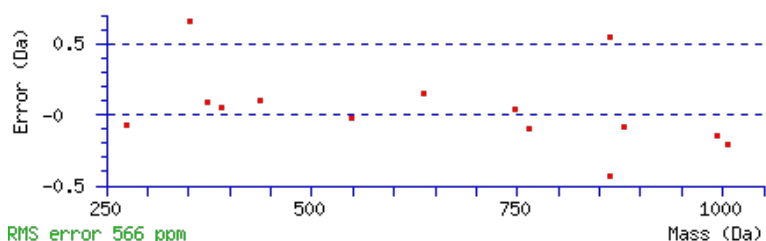

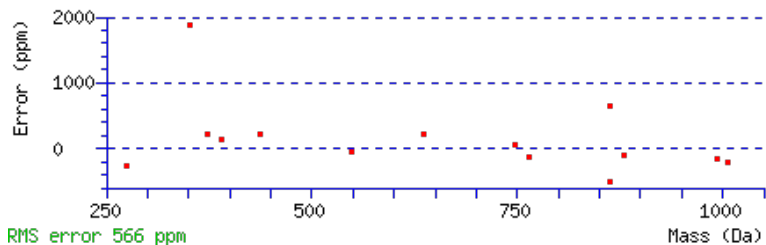

NCBI **BLAST** search of [CINQSICEK](#)  
 (Parameters: blastp, nr protein database, expect=20000, no filter, PAM30)  
 Other BLAST [web gateways](#)

**All matches to this query**

| Score | Mr(calc)  | Delta   | Sequence                   | Site Analysis        |
|-------|-----------|---------|----------------------------|----------------------|
| 47.6  | 1151.4951 | 0.0043  | <a href="#">CINQSICEK</a>  | Deamidated N3 93.35% |
| 36.2  | 1151.4951 | 0.0043  | <a href="#">CINQSICEK</a>  | Deamidated Q4 6.65%  |
| 19.1  | 1151.4951 | 0.0044  | <a href="#">CNLKQCAQK</a>  |                      |
| 7.5   | 1150.4924 | 1.0070  | <a href="#">GLTDSECNQK</a> |                      |
| 6.3   | 1151.5029 | -0.0035 | <a href="#">HHNMNELQK</a>  |                      |
| 5.0   | 1151.5016 | -0.0022 | <a href="#">ENVSALDMEK</a> |                      |
| 4.8   | 1151.5016 | -0.0022 | <a href="#">LTNGMNNIEK</a> |                      |
| 4.5   | 1151.4951 | 0.0043  | <a href="#">CLVSNCGVNK</a> |                      |
| 3.4   | 1151.5029 | -0.0035 | <a href="#">HHNMNELQK</a>  |                      |
| 3.2   | 1150.4924 | 1.0070  | <a href="#">ENSGTCQVQK</a> |                      |

**Mascot:** <http://www.matrixscience.com/>

# MASCOT SCIENCE Mascot Search Results

## Peptide View

MS/MS Fragmentation of **AATCINPLNGSVCERPANHSK**

Found in **075882** in **con\_Xuniprot\_HUMAN3**, ATRN\_HUMAN Attractin OS=Homo sapiens GN=ATRN PE=1 SV=2

Match to Query 20957: 2368.093016 from(593.030530,4+) intensity(30446.5313) rtinseconds(584) scans(1402) index(17360)

Title: 111019\_Est\_ML\_YP\_G\_07Spectrum1217\_scans\_\_1402

Data file C:\\mascot\\20140703\_Tmgf\_1D\\CSV\_UseAnalysis\\MasterCSV\\All\_Glyco\\mgf\\ptm\\UC18ERLIC\_PTM\_35D.mgf

Click mouse within plot area to zoom in by factor of two about that point

Or, to Da

Label all possible matches Label matches used for scoring

Show Y-axis

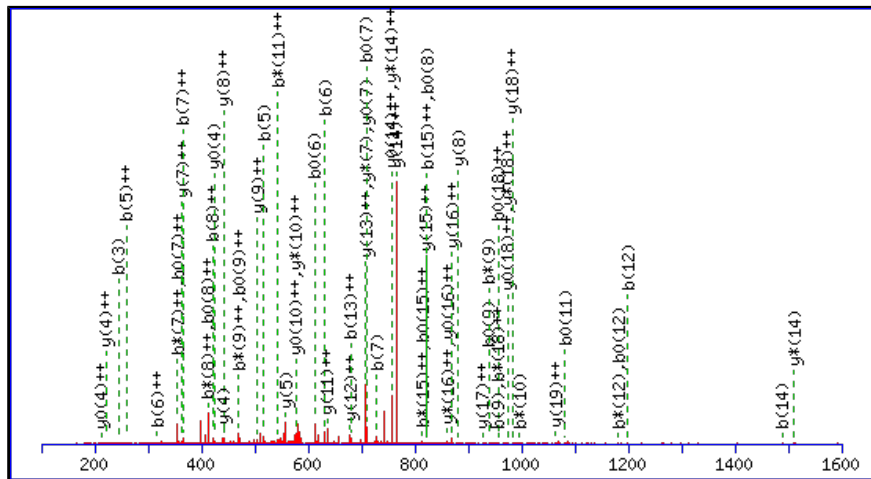

Monoisotopic mass of neutral peptide Mr(calc): 2368.0899

Fixed modifications: Carbamidomethyl (C) (apply to specified residues or termini only)

Variable modifications:

N9 : Deamidated (NQ)

N18 : Deamidated (NQ)

Ions Score: 45 Expect: 0.0058

Matches : 62/234 fragment ions using 118 most intense peaks ([help](#))

| #  | b                | b <sup>++</sup> | b <sup>*</sup>   | b <sup>*++</sup> | b <sup>0</sup>   | b <sup>0++</sup> | Seq. | y               | y <sup>++</sup>  | y <sup>*</sup>   | y <sup>*++</sup> | y <sup>0</sup>  | y <sup>0++</sup> | #  |
|----|------------------|-----------------|------------------|------------------|------------------|------------------|------|-----------------|------------------|------------------|------------------|-----------------|------------------|----|
| 1  | 72.0444          | 36.5258         |                  |                  |                  |                  | A    |                 |                  |                  |                  |                 |                  | 22 |
| 2  | 143.0815         | 72.0444         |                  |                  |                  |                  | A    | 2298.0601       | 1149.5337        | 2281.0336        | 1141.0204        | 2280.0496       | 1140.5284        | 21 |
| 3  | <b>244.1292</b>  | 122.5682        |                  |                  | 226.1186         | 113.5629         | T    | 2227.0230       | 1114.0152        | 2209.9965        | 1105.5019        | 2209.0125       | 1105.0099        | 20 |
| 4  | 404.1598         | 202.5836        |                  |                  | 386.1493         | 193.5783         | C    | 2125.9753       | <b>1063.4913</b> | 2108.9488        | 1054.9780        | 2107.9648       | 1054.4860        | 19 |
| 5  | <b>517.2439</b>  | <b>259.1256</b> |                  |                  | 499.2333         | 250.1203         | I    | 1965.9447       | <b>983.4760</b>  | 1948.9182        | <b>974.9627</b>  | 1947.9341       | <b>974.4707</b>  | 18 |
| 6  | <b>631.2868</b>  | <b>316.1470</b> | 614.2603         | 307.6338         | <b>613.2763</b>  | 307.1418         | N    | 1852.8606       | <b>926.9340</b>  | 1835.8341        | 918.4207         | 1834.8501       | 917.9287         | 17 |
| 7  | <b>728.3396</b>  | <b>364.6734</b> | 711.3130         | <b>356.1602</b>  | <b>710.3290</b>  | <b>355.6681</b>  | P    | 1738.8177       | <b>869.9125</b>  | 1721.7912        | <b>861.3992</b>  | 1720.8071       | <b>860.9072</b>  | 16 |
| 8  | 841.4237         | <b>421.2155</b> | 824.3971         | <b>412.7022</b>  | <b>823.4131</b>  | <b>412.2102</b>  | L    | 1641.7649       | <b>821.3861</b>  | 1624.7384        | 812.8728         | 1623.7544       | 812.3808         | 15 |
| 9  | <b>956.4506</b>  | 478.7289        | <b>939.4240</b>  | <b>470.2157</b>  | <b>938.4400</b>  | <b>469.7237</b>  | N    | 1528.6809       | <b>764.8441</b>  | <b>1511.6543</b> | <b>756.3308</b>  | 1510.6703       | <b>755.8388</b>  | 14 |
| 10 | 1013.4721        | 507.2397        | <b>996.4455</b>  | 498.7264         | 995.4615         | 498.2344         | G    | 1413.6539       | <b>707.3306</b>  | 1396.6274        | 698.8173         | 1395.6434       | 698.3253         | 13 |
| 11 | 1100.5041        | 550.7557        | 1083.4775        | <b>542.2424</b>  | <b>1082.4935</b> | 541.7504         | S    | 1356.6325       | <b>678.8199</b>  | 1339.6059        | 670.3066         | 1338.6219       | 669.8146         | 12 |
| 12 | <b>1199.5725</b> | 600.2899        | <b>1182.5460</b> | 591.7766         | <b>1181.5619</b> | 591.2846         | V    | 1269.6004       | <b>635.3039</b>  | 1252.5739        | 626.7906         | 1251.5899       | 626.2986         | 11 |
| 13 | 1359.6031        | <b>680.3052</b> | 1342.5766        | 671.7919         | 1341.5926        | 671.2999         | C    | 1170.5320       | 585.7697         | 1153.5055        | <b>577.2564</b>  | 1152.5215       | <b>576.7644</b>  | 10 |
| 14 | <b>1488.6457</b> | 744.8265        | 1471.6192        | 736.3132         | 1470.6352        | 735.8212         | E    | 1010.5014       | <b>505.7543</b>  | 993.4748         | 497.2411         | 992.4908        | 496.7490         | 9  |
| 15 | 1644.7469        | <b>822.8771</b> | 1627.7203        | <b>814.3638</b>  | 1626.7363        | <b>813.8718</b>  | R    | <b>881.4588</b> | <b>441.2330</b>  | 864.4322         | 432.7198         | 863.4482        | 432.2278         | 8  |
| 16 | 1741.7996        | 871.4034        | 1724.7731        | 862.8902         | 1723.7891        | 862.3982         | P    | 725.3577        | <b>363.1825</b>  | <b>708.3311</b>  | 354.6692         | <b>707.3471</b> | 354.1772         | 7  |
| 17 | 1812.8367        | 906.9220        | 1795.8102        | 898.4087         | 1794.8262        | 897.9167         | A    | 628.3049        | 314.6561         | 611.2784         | 306.1428         | 610.2944        | 305.6508         | 6  |
| 18 | 1927.8637        | 964.4355        | 1910.8371        | <b>955.9222</b>  | 1909.8531        | <b>955.4302</b>  | N    | <b>557.2678</b> | 279.1375         | 540.2413         | 270.6243         | 539.2572        | 270.1323         | 5  |
| 19 | 2064.9226        | 1032.9649       | 2047.8960        | 1024.4517        | 2046.9120        | 1023.9596        | H    | <b>442.2409</b> | <b>221.6241</b>  | 425.2143         | 213.1108         | <b>424.2303</b> | <b>212.6188</b>  | 4  |
| 20 | 2151.9546        | 1076.4809       | 2134.9281        | 1067.9677        | 2133.9440        | 1067.4757        | S    | 305.1819        | 153.0946         | 288.1554         | 144.5813         | 287.1714        | 144.0893         | 3  |
| 21 | 2222.9917        | 1111.9995       | 2205.9652        | 1103.4862        | 2204.9812        | 1102.9942        | A    | 218.1499        | 109.5786         | 201.1234         | 101.0653         |                 |                  | 2  |
| 22 |                  |                 |                  |                  |                  |                  | K    | 147.1128        | 74.0600          | 130.0863         | 65.5468          |                 |                  | 1  |

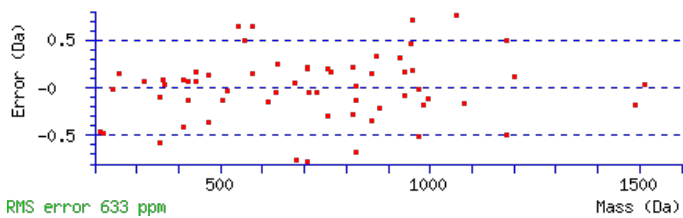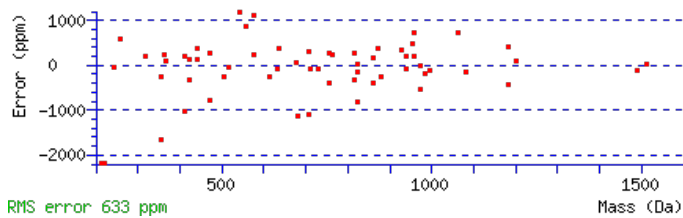

NCBI BLAST search of [AATCINPLNGSVCERPANHSAK](#)

(Parameters: blastp, nr protein database, expect=20000, no filter, PAM30)

Other BLAST [web gateways](#)

All matches to this query

| Score | Mr(calc)  | Delta   | Sequence                               | Site Analysis             |
|-------|-----------|---------|----------------------------------------|---------------------------|
| 45.1  | 2368.0899 | 0.0031  | <a href="#">AATCINPLNGSVCERPANHSAK</a> | Deamidated N9, N18 89.68% |
| 33.3  | 2368.0899 | 0.0031  | <a href="#">AATCINPLNGSVCERPANHSAK</a> | Deamidated N6, N18 5.97%  |
| 31.9  | 2368.0899 | 0.0031  | <a href="#">AATCINPLNGSVCERPANHSAK</a> | Deamidated N6, N9 4.35%   |
| 7.1   | 2366.0930 | 2.0001  | <a href="#">LGTGAAVGLWGCRNNCMGTITR</a> |                           |
| 3.0   | 2367.0776 | 1.0154  | <a href="#">YSEAARSAMIADYMEWLGGGR</a>  |                           |
| 2.9   | 2367.0835 | 1.0095  | <a href="#">ERKNVNVESCAVWNSTLIC</a>    |                           |
| 2.8   | 2368.0940 | -0.0010 | <a href="#">VHTGERPYECSECGKAFLTK</a>   |                           |
| 2.6   | 2368.0821 | 0.0109  | <a href="#">LNHMSNKTSSKNMEMVQOK</a>    |                           |
| 2.6   | 2368.0821 | 0.0109  | <a href="#">LNHMSNKTSSKNMEMVQOK</a>    |                           |
| 2.6   | 2368.0821 | 0.0109  | <a href="#">LNHMSNKTSSKNMEMVQOK</a>    |                           |

Mascot: <http://www.matrixscience.com/>

# MASCOT SCIENCE Mascot Search Results

## Peptide View

MS/MS Fragmentation of **GICNSSDVR**

Found in **075882** in **con\_Xuniprot\_HUMAN3**, ATRN\_HUMAN Attractin OS=Homo sapiens GN=ATRN PE=1 SV=2

Match to Query 164: 1007.435788 from(504.725170,2+) intensity(8102.9697) rtinseconds(196) scans(383) index(19264)

Title: 111019\_Est\_MI\_YP\_G\_09Spectrum326\_scans\_383

Data file C:\mascot\20140703\_Tmgf\_1D\CSV\_UseAnalysis\MasterCSV\All\_Glyco\mgf\ptm\UC18ERLIC\_PTM\_35D.mgf

Click mouse within plot area to zoom in by factor of two about that point

Or,  to  Da

Label all possible matches  Label matches used for scoring

Show Y-axis

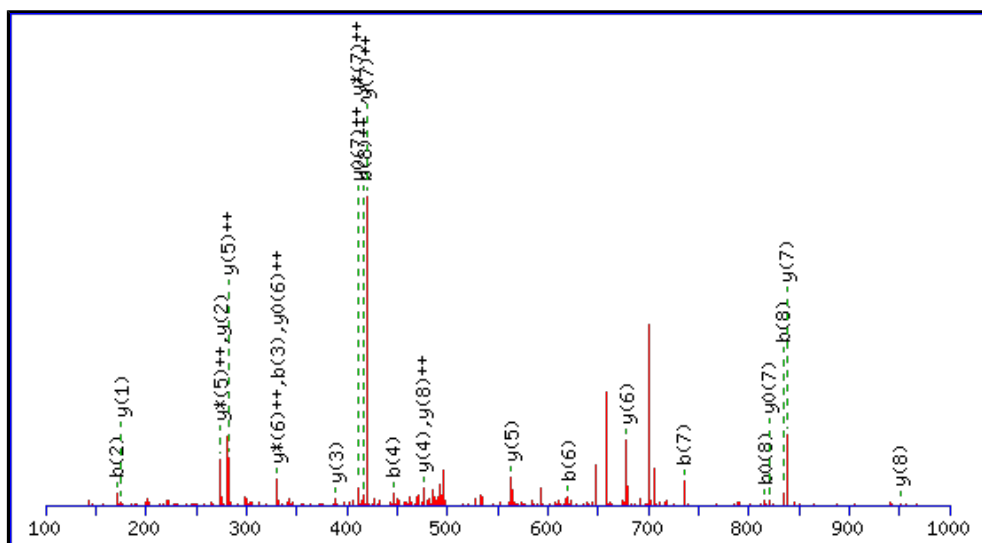

Monoisotopic mass of neutral peptide  $M_r(\text{calc})$ : 1007.4342

Fixed modifications: Carbamidomethyl (C) (apply to specified residues or termini only)

Variable modifications:

N4 : Deamidated (NQ)

Ions Score: 42 Expect: 0.0051

Matches : 25/78 fragment ions using 51 most intense peaks ([help](#))

| # | b        | b <sup>++</sup> | b*       | b <sup>***</sup> | b <sup>0</sup> | b <sup>0++</sup> | Seq. | y        | y <sup>++</sup> | y*       | y <sup>***</sup> | y <sup>0</sup> | y <sup>0++</sup> | # |
|---|----------|-----------------|----------|------------------|----------------|------------------|------|----------|-----------------|----------|------------------|----------------|------------------|---|
| 1 | 58.0287  | 29.5180         |          |                  |                |                  | G    |          |                 |          |                  |                |                  | 9 |
| 2 | 171.1128 | 86.0600         |          |                  |                |                  | I    | 951.4200 | 476.2136        | 934.3935 | 467.7004         | 933.4095       | 467.2084         | 8 |
| 3 | 331.1435 | 166.0754        |          |                  |                |                  | C    | 838.3360 | 419.6716        | 821.3094 | 411.1583         | 820.3254       | 410.6663         | 7 |
| 4 | 446.1704 | 223.5888        | 429.1438 | 215.0756         |                |                  | N    | 678.3053 | 339.6563        | 661.2788 | 331.1430         | 660.2947       | 330.6510         | 6 |
| 5 | 533.2024 | 267.1049        | 516.1759 | 258.5916         | 515.1919       | 258.0996         | S    | 563.2784 | 282.1428        | 546.2518 | 273.6295         | 545.2678       | 273.1375         | 5 |
| 6 | 620.2345 | 310.6209        | 603.2079 | 302.1076         | 602.2239       | 301.6156         | S    | 476.2463 | 238.6268        | 459.2198 | 230.1135         | 458.2358       | 229.6215         | 4 |
| 7 | 735.2614 | 368.1343        | 718.2348 | 359.6211         | 717.2508       | 359.1291         | D    | 389.2143 | 195.1108        | 372.1878 | 186.5975         | 371.2037       | 186.1055         | 3 |
| 8 | 834.3298 | 417.6685        | 817.3033 | 409.1553         | 816.3192       | 408.6633         | V    | 274.1874 | 137.5973        | 257.1608 | 129.0840         |                |                  | 2 |
| 9 |          |                 |          |                  |                |                  | R    | 175.1190 | 88.0631         | 158.0924 | 79.5498          |                |                  | 1 |

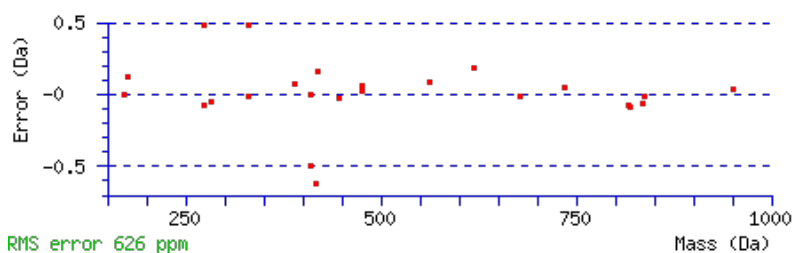



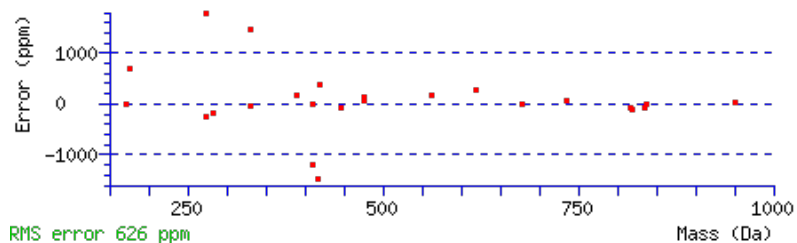

NCBI **BLAST** search of [GICNSSDVR](#)

(Parameters: blastp, nr protein database, expect=20000, no filter, PAM30)

Other BLAST [web gateways](#)

**All matches to this query**

| Score | Mr(calc)  | Delta  | Sequence                   |
|-------|-----------|--------|----------------------------|
| 41.6  | 1007.4342 | 0.0016 | <a href="#">GICNSSDVR</a>  |
| 7.0   | 1007.4342 | 0.0016 | <a href="#">VACQASSER</a>  |
| 4.9   | 1007.4342 | 0.0016 | <a href="#">AAMSGQGVDR</a> |
| 4.7   | 1007.4342 | 0.0016 | <a href="#">SSAGGEDMVR</a> |
| 1.5   | 1006.4291 | 1.0067 | <a href="#">WDAATGACR</a>  |
| 1.2   | 1005.4298 | 2.0060 | <a href="#">CGDKGGGAER</a> |
| 0.5   | 1007.4342 | 0.0016 | <a href="#">ALMNN SQGR</a> |
| 0.2   | 1006.4291 | 1.0067 | <a href="#">IGCDYSHR</a>   |
| 0.1   | 1006.4316 | 1.0042 | <a href="#">TQSGAGSDER</a> |

**Mascot:** <http://www.matrixscience.com/>

# MASCOT SCIENCE Mascot Search Results

## Peptide View

MS/MS Fragmentation of **MVSHHNLTTGATLINEQWLLTTAKNLFNLHSEENATAK**

Found in **J3QR68** in **con\_Xuniprot\_HUMAN3**, J3QR68\_HUMAN Haptoglobin (Fragment) OS=Homo sapiens GN=HP PE=3 SV=1

Match to Query 28443: 4121.065016 from(1031.273530,4+) intensity(57221.5000) rtinseconds(2505) scans(6608) index(19889)

Title: 111019\_Est\_MI\_YP\_G\_09Spectrum5854\_scans\_\_6608

Data file C:\mascot\20140703\_Tmgf\_1D\CSV\_UseAnalysis\MasterCSV\All\_Glyco\mgf\ptm\UC18ERLIC\_PTM\_35D.mgf

Click mouse within plot area to zoom in by factor of two about that point

Or, to Da

Label all possible matches Label matches used for scoring

Show Y-axis

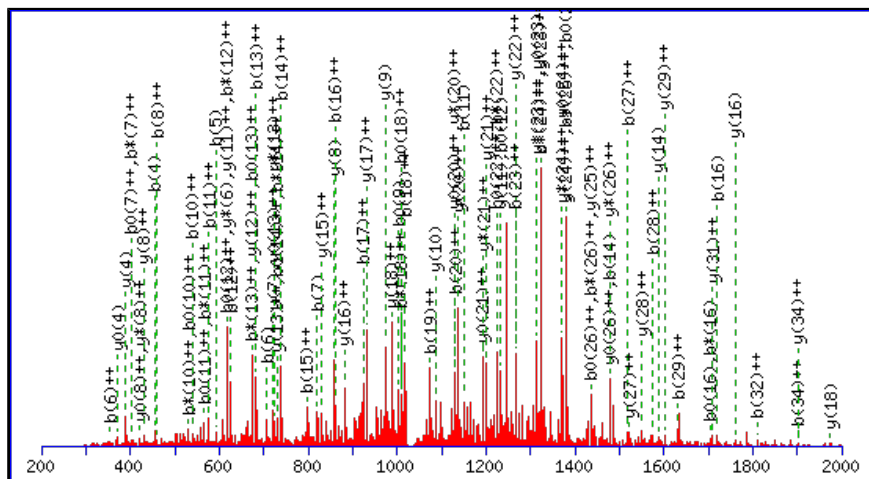

Monoisotopic mass of neutral peptide Mr(calc): 4121.0527

Fixed modifications: Carbamidomethyl (C) (apply to specified residues or termini only)

Variable modifications:

N6 : Deamidated (NQ)

N29 : Deamidated (NQ)

N33 : Deamidated (NQ)

Ions Score: 130 Expect: 1.7e-011

Matches : 96/414 fragment ions using 119 most intense peaks (help)

| #  | b                | b <sup>++</sup>  | b <sup>*</sup>   | b <sup>*++</sup> | b <sup>0</sup>   | b <sup>0++</sup> | Seq. | y                | y <sup>++</sup>  | y <sup>*</sup> | y <sup>*++</sup> | y <sup>0</sup> | y <sup>0++</sup> | #  |
|----|------------------|------------------|------------------|------------------|------------------|------------------|------|------------------|------------------|----------------|------------------|----------------|------------------|----|
| 1  | 132.0478         | 66.5275          |                  |                  |                  |                  | M    |                  |                  |                |                  |                |                  | 37 |
| 2  | 231.1162         | 116.0617         |                  |                  |                  |                  | V    | 3991.0196        | 1996.0134        | 3973.9930      | 1987.5002        | 3973.0090      | 1987.0081        | 36 |
| 3  | 318.1482         | 159.5777         |                  |                  | 300.1376         | 150.5725         | S    | 3891.9512        | 1946.4792        | 3874.9246      | 1937.9660        | 3873.9406      | 1937.4739        | 35 |
| 4  | <b>455.2071</b>  | 228.1072         |                  |                  | 437.1966         | 219.1019         | H    | 3804.9191        | <b>1902.9632</b> | 3787.8926      | 1894.4499        | 3786.9086      | 1893.9579        | 34 |
| 5  | <b>592.2660</b>  | 296.6367         |                  |                  | 574.2555         | 287.6314         | H    | 3667.8602        | 1834.4338        | 3650.8337      | 1825.9205        | 3649.8497      | 1825.4285        | 33 |
| 6  | <b>707.2930</b>  | <b>354.1501</b>  | 690.2664         | 345.6368         | 689.2824         | 345.1448         | N    | 3530.8013        | 1765.9043        | 3513.7748      | 1757.3910        | 3512.7908      | 1756.8990        | 32 |
| 7  | <b>820.3770</b>  | 410.6922         | 803.3505         | <b>402.1789</b>  | 802.3665         | <b>401.6869</b>  | L    | 3415.7744        | <b>1708.3908</b> | 3398.7478      | 1699.8776        | 3397.7638      | 1699.3855        | 31 |
| 8  | 921.4247         | <b>461.2160</b>  | 904.3982         | 452.7027         | 903.4141         | 452.2107         | T    | 3302.6903        | 1651.8488        | 3285.6638      | 1643.3355        | 3284.6798      | 1642.8435        | 30 |
| 9  | 1022.4724        | 511.7398         | 1005.4458        | 503.2266         | <b>1004.4618</b> | 502.7346         | T    | 3201.6426        | <b>1601.3250</b> | 3184.6161      | 1592.8117        | 3183.6321      | 1592.3197        | 29 |
| 10 | 1079.4939        | <b>540.2506</b>  | 1062.4673        | <b>531.7373</b>  | 1061.4833        | <b>531.2453</b>  | G    | 3100.5950        | <b>1550.8011</b> | 3083.5684      | 1542.2878        | 3082.5844      | 1541.7958        | 28 |
| 11 | <b>1150.5310</b> | <b>575.7691</b>  | 1133.5044        | <b>567.2558</b>  | 1132.5204        | <b>566.7638</b>  | A    | 3043.5735        | <b>1522.2904</b> | 3026.5469      | 1513.7771        | 3025.5629      | 1513.2851        | 27 |
| 12 | 1251.5786        | <b>626.2930</b>  | 1234.5521        | <b>617.7797</b>  | <b>1233.5681</b> | <b>617.2877</b>  | T    | 2972.5364        | 1486.7718        | 2955.5098      | <b>1478.2586</b> | 2954.5258      | <b>1477.7665</b> | 26 |
| 13 | 1364.6627        | <b>682.8350</b>  | 1347.6362        | <b>674.3217</b>  | 1346.6521        | <b>673.8297</b>  | L    | 2871.4887        | <b>1436.2480</b> | 2854.4622      | 1427.7347        | 2853.4781      | 1427.2427        | 25 |
| 14 | <b>1477.7468</b> | <b>739.3770</b>  | 1460.7202        | <b>730.8638</b>  | 1459.7362        | <b>730.3717</b>  | I    | 2758.4046        | <b>1379.7060</b> | 2741.3781      | <b>1371.1927</b> | 2740.3941      | <b>1370.7007</b> | 24 |
| 15 | 1591.7897        | <b>796.3985</b>  | 1574.7632        | 787.8852         | 1573.7791        | 787.3932         | N    | 2645.3206        | <b>1323.1639</b> | 2628.2940      | <b>1314.6506</b> | 2627.3100      | <b>1314.1586</b> | 23 |
| 16 | <b>1720.8323</b> | <b>860.9198</b>  | <b>1703.8057</b> | 852.4065         | <b>1702.8217</b> | 851.9145         | E    | 2531.2776        | <b>1266.1425</b> | 2514.2511      | 1257.6292        | 2513.2671      | 1257.1372        | 22 |
| 17 | 1848.8909        | <b>924.9491</b>  | 1831.8643        | 916.4358         | 1830.8803        | 915.9438         | Q    | 2402.2351        | <b>1201.6212</b> | 2385.2085      | <b>1193.1079</b> | 2384.2245      | <b>1192.6159</b> | 21 |
| 18 | 2034.9702        | <b>1017.9887</b> | 2017.9436        | <b>1009.4755</b> | 2016.9596        | <b>1008.9834</b> | W    | 2274.1765        | <b>1137.5919</b> | 2257.1499      | <b>1129.0786</b> | 2256.1659      | <b>1128.5866</b> | 20 |
| 19 | 2148.0543        | <b>1074.5308</b> | 2131.0277        | 1066.0175        | 2130.0437        | 1065.5255        | L    | 2088.0972        | 1044.5522        | 2071.0706      | 1036.0389        | 2070.0866      | 1035.5469        | 19 |
| 20 | 2261.1383        | <b>1131.0728</b> | 2244.1118        | 1122.5595        | 2243.1278        | 1122.0675        | L    | <b>1975.0131</b> | <b>988.0102</b>  | 1957.9865      | 979.4969         | 1957.0025      | 979.0049         | 18 |
| 21 | 2362.1860        | 1181.5966        | 2345.1594        | 1173.0834        | 2344.1754        | 1172.5914        | T    | 1861.9290        | <b>931.4682</b>  | 1844.9025      | 922.9549         | 1843.9185      | 922.4629         | 17 |
| 22 | 2463.2337        | 1232.1205        | 2446.2071        | <b>1223.6072</b> | 2445.2231        | <b>1223.1152</b> | T    | <b>1760.8814</b> | <b>880.9443</b>  | 1743.8548      | 872.4310         | 1742.8708      | 871.9390         | 16 |

|    |           |                  |           |                  |           |                  |   |                  |                 |                 |                 |                 |                 |    |
|----|-----------|------------------|-----------|------------------|-----------|------------------|---|------------------|-----------------|-----------------|-----------------|-----------------|-----------------|----|
| 23 | 2534.2708 | <b>1267.6390</b> | 2517.2442 | 1259.1258        | 2516.2602 | 1258.6337        | A | 1659.8337        | <b>830.4205</b> | 1642.8071       | 821.9072        | 1641.8231       | 821.4152        | 15 |
| 24 | 2662.3658 | 1331.6865        | 2645.3392 | <b>1323.1732</b> | 2644.3552 | <b>1322.6812</b> | K | <b>1588.7966</b> | 794.9019        | 1571.7700       | 786.3886        | 1570.7860       | 785.8966        | 14 |
| 25 | 2776.4087 | 1388.7080        | 2759.3821 | <b>1380.1947</b> | 2758.3981 | <b>1379.7027</b> | N | 1460.7016        | <b>730.8544</b> | 1443.6751       | <b>722.3412</b> | 1442.6910       | <b>721.8492</b> | 13 |
| 26 | 2889.4927 | 1445.2500        | 2872.4662 | <b>1436.7367</b> | 2871.4822 | <b>1436.2447</b> | L | 1346.6587        | <b>673.8330</b> | 1329.6321       | 665.3197        | 1328.6481       | 664.8277        | 12 |
| 27 | 3036.5612 | <b>1518.7842</b> | 3019.5346 | 1510.2709        | 3018.5506 | 1509.7789        | F | <b>1233.5746</b> | <b>617.2909</b> | 1216.5481       | 608.7777        | 1215.5640       | 608.2857        | 11 |
| 28 | 3149.6452 | <b>1575.3262</b> | 3132.6187 | 1566.8130        | 3131.6347 | 1566.3210        | L | <b>1086.5062</b> | 543.7567        | 1069.4796       | 535.2435        | 1068.4956       | 534.7515        | 10 |
| 29 | 3264.6722 | <b>1632.8397</b> | 3247.6456 | 1624.3264        | 3246.6616 | 1623.8344        | N | <b>973.4221</b>  | 487.2147        | 956.3956        | 478.7014        | 955.4116        | 478.2094        | 9  |
| 30 | 3401.7311 | 1701.3692        | 3384.7045 | 1692.8559        | 3383.7205 | 1692.3639        | H | <b>858.3952</b>  | <b>429.7012</b> | 841.3686        | <b>421.1880</b> | 840.3846        | <b>420.6959</b> | 8  |
| 31 | 3488.7631 | 1744.8852        | 3471.7366 | 1736.3719        | 3470.7525 | 1735.8799        | S | <b>721.3363</b>  | 361.1718        | 704.3097        | 352.6585        | 703.3257        | 352.1665        | 7  |
| 32 | 3617.8057 | <b>1809.4065</b> | 3600.7791 | 1800.8932        | 3599.7951 | 1800.4012        | E | 634.3042         | 317.6558        | <b>617.2777</b> | 309.1425        | 616.2937        | 308.6505        | 6  |
| 33 | 3732.8326 | 1866.9200        | 3715.8061 | 1858.4067        | 3714.8221 | 1857.9147        | N | 505.2617         | 253.1345        | 488.2351        | 244.6212        | 487.2511        | 244.1292        | 5  |
| 34 | 3803.8698 | <b>1902.4385</b> | 3786.8432 | 1893.9252        | 3785.8592 | 1893.4332        | A | <b>390.2347</b>  | 195.6210        | 373.2082        | 187.1077        | <b>372.2241</b> | 186.6157        | 4  |
| 35 | 3904.9174 | 1952.9624        | 3887.8909 | 1944.4491        | 3886.9069 | 1943.9571        | T | 319.1976         | 160.1024        | 302.1710        | 151.5892        | 301.1870        | 151.0972        | 3  |
| 36 | 3975.9545 | 1988.4809        | 3958.9280 | 1979.9676        | 3957.9440 | 1979.4756        | A | 218.1499         | 109.5786        | 201.1234        | 101.0653        |                 |                 | 2  |
| 37 |           |                  |           |                  |           |                  | K | 147.1128         | 74.0600         | 130.0863        | 65.5468         |                 |                 | 1  |

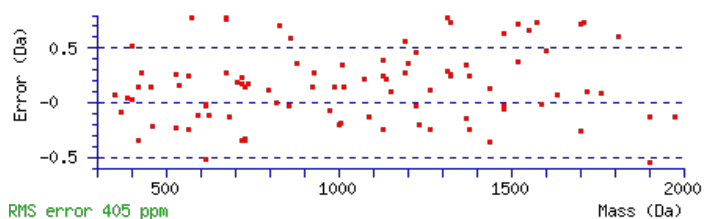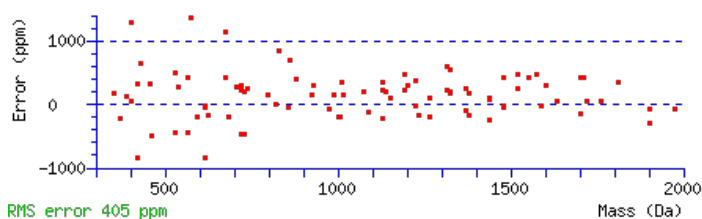

NCBI BLAST search of [MVSHHNLTTGATLINEQWLLTTAKNLFNLHSENATAK](#)

(Parameters: blastp, nr protein database, expect=20000, no filter, PAM30)

Other BLAST [web gateways](#)

All matches to this query

| Score | Mr(calc)  | Delta  | Sequence                                              | Site Analysis                  |
|-------|-----------|--------|-------------------------------------------------------|--------------------------------|
| 130.4 | 4121.0527 | 0.0123 | <a href="#">MVSHHNLTTGATLINEQWLLTTAKNLFNLHSENATAK</a> | Deamidated N6, N29, N33 94.45% |
| 115.6 | 4121.0527 | 0.0123 | <a href="#">MVSHHNLTTGATLINEQWLLTTAKNLFNLHSENATAK</a> | Deamidated Q17, N25, N29 3.13% |
| 111.9 | 4121.0527 | 0.0123 | <a href="#">MVSHHNLTTGATLINEQWLLTTAKNLFNLHSENATAK</a> | Deamidated N6, N15, N33 1.34%  |
| 110.8 | 4121.0527 | 0.0123 | <a href="#">MVSHHNLTTGATLINEQWLLTTAKNLFNLHSENATAK</a> | Deamidated N25, N29, N33 1.04% |
| 95.9  | 4121.0527 | 0.0123 | <a href="#">MVSHHNLTTGATLINEQWLLTTAKNLFNLHSENATAK</a> | Deamidated N15, Q17, N25 0.03% |
| 94.0  | 4120.0687 | 0.9963 | <a href="#">MVSHHNLTTGATLINEQWLLTTAKNLFNLHSENATAK</a> |                                |
| 91.3  | 4120.0687 | 0.9963 | <a href="#">MVSHHNLTTGATLINEQWLLTTAKNLFNLHSENATAK</a> |                                |
| 89.3  | 4120.0687 | 0.9963 | <a href="#">MVSHHNLTTGATLINEQWLLTTAKNLFNLHSENATAK</a> |                                |
| 85.1  | 4120.0687 | 0.9963 | <a href="#">MVSHHNLTTGATLINEQWLLTTAKNLFNLHSENATAK</a> |                                |
| 82.8  | 4120.0687 | 0.9963 | <a href="#">MVSHHNLTTGATLINEQWLLTTAKNLFNLHSENATAK</a> |                                |

Mascot: <http://www.matrixscience.com/>

# MATRIX SCIENCE Mascot Search Results

## Peptide View

MS/MS Fragmentation of **MVSHHNLTTGATLINEQWLLTTAKNLFNLHSEENATAK**

Found in **J3QR68** in **con\_Xuniprot\_HUMAN3**, J3QR68\_HUMAN Haptoglobin (Fragment) OS=Homo sapiens GN=HP PE=3 SV=1

Match to Query 28479: 4121.069016 from(1031.274530,4+) intensity(134370.2344) rtinseconds(2578) scans(6736) index(25646)

Title: 111019\_Est\_MI\_YS\_G\_07Spectrum5803\_scans\_6736

Data file C:\mascot\20140703\_Tmgf\_1D\CSV\_UseAnalysis\MasterCSV\All\_Glyco\mgf\ptm\UC18ERLIC\_PTM\_35D.mgf

Click mouse within plot area to zoom in by factor of two about that point

Or,  to  Da

Label all possible matches  Label matches used for scoring

Show Y-axis

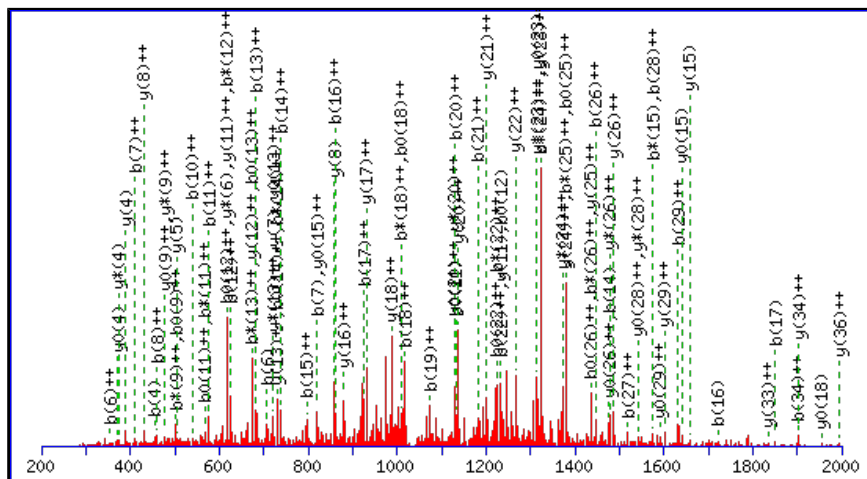

Monoisotopic mass of neutral peptide Mr(calc): 4121.0527

Fixed modifications: Carbamidomethyl (C) (apply to specified residues or termini only)

Variable modifications:

N6 : Deamidated (NQ)

N15 : Deamidated (NQ)

N33 : Deamidated (NQ)

Ions Score: 123 Expect: 8.5e-011

Matches : 94/414 fragment ions using 121 most intense peaks ([help](#))

| #  | b                | b <sup>++</sup>  | b <sup>*</sup>   | b <sup>*++</sup> | b <sup>0</sup>   | b <sup>0++</sup> | Seq. | y         | y <sup>++</sup>  | y <sup>*</sup> | y <sup>*++</sup> | y <sup>0</sup>   | y <sup>0++</sup> | #  |
|----|------------------|------------------|------------------|------------------|------------------|------------------|------|-----------|------------------|----------------|------------------|------------------|------------------|----|
| 1  | 132.0478         | 66.5275          |                  |                  |                  |                  | M    |           |                  |                |                  |                  |                  | 37 |
| 2  | 231.1162         | 116.0617         |                  |                  |                  |                  | V    | 3991.0196 | 1996.0134        | 3973.9930      | 1987.5002        | 3973.0090        | 1987.0081        | 36 |
| 3  | 318.1482         | 159.5777         |                  |                  | 300.1376         | 150.5725         | S    | 3891.9512 | 1946.4792        | 3874.9246      | 1937.9660        | 3873.9406        | 1937.4739        | 35 |
| 4  | <b>455.2071</b>  | 228.1072         |                  |                  | 437.1966         | 219.1019         | H    | 3804.9191 | <b>1902.9632</b> | 3787.8926      | 1894.4499        | 3786.9086        | 1893.9579        | 34 |
| 5  | 592.2660         | 296.6367         |                  |                  | 574.2555         | 287.6314         | H    | 3667.8602 | <b>1834.4338</b> | 3650.8337      | 1825.9205        | 3649.8497        | 1825.4285        | 33 |
| 6  | <b>707.2930</b>  | <b>354.1501</b>  | 690.2664         | 345.6368         | 689.2824         | 345.1448         | N    | 3530.8013 | 1765.9043        | 3513.7748      | 1757.3910        | 3512.7908        | 1756.8990        | 32 |
| 7  | <b>820.3770</b>  | <b>410.6922</b>  | 803.3505         | 402.1789         | 802.3665         | 401.6869         | L    | 3415.7744 | 1708.3908        | 3398.7478      | 1699.8776        | 3397.7638        | 1699.3855        | 31 |
| 8  | 921.4247         | <b>461.2160</b>  | 904.3982         | 452.7027         | 903.4141         | 452.2107         | T    | 3302.6903 | 1651.8488        | 3285.6638      | 1643.3355        | 3284.6798        | 1642.8435        | 30 |
| 9  | 1022.4724        | 511.7398         | 1005.4458        | <b>503.2266</b>  | 1004.4618        | <b>502.7346</b>  | T    | 3201.6426 | <b>1601.3250</b> | 3184.6161      | 1592.8117        | 3183.6321        | <b>1592.3197</b> | 29 |
| 10 | 1079.4939        | <b>540.2506</b>  | 1062.4673        | 531.7373         | 1061.4833        | 531.2453         | G    | 3100.5950 | 1550.8011        | 3083.5684      | <b>1542.2878</b> | 3082.5844        | <b>1541.7958</b> | 28 |
| 11 | 1150.5310        | <b>575.7691</b>  | 1133.5044        | <b>567.2558</b>  | <b>1132.5204</b> | <b>566.7638</b>  | A    | 3043.5735 | 1522.2904        | 3026.5469      | 1513.7771        | 3025.5629        | 1513.2851        | 27 |
| 12 | 1251.5786        | <b>626.2930</b>  | 1234.5521        | <b>617.7797</b>  | <b>1233.5681</b> | <b>617.2877</b>  | T    | 2972.5364 | <b>1486.7718</b> | 2955.5098      | <b>1478.2586</b> | 2954.5258        | <b>1477.7665</b> | 26 |
| 13 | 1364.6627        | <b>682.8350</b>  | 1347.6362        | <b>674.3217</b>  | 1346.6521        | <b>673.8297</b>  | L    | 2871.4887 | <b>1436.2480</b> | 2854.4622      | 1427.7347        | 2853.4781        | 1427.2427        | 25 |
| 14 | <b>1477.7468</b> | <b>739.3770</b>  | 1460.7202        | <b>730.8638</b>  | 1459.7362        | <b>730.3717</b>  | I    | 2758.4046 | <b>1379.7060</b> | 2741.3781      | <b>1371.1927</b> | 2740.3941        | 1370.7007        | 24 |
| 15 | 1592.7737        | <b>796.8905</b>  | <b>1575.7472</b> | 788.3772         | 1574.7632        | 787.8852         | N    | 2645.3206 | <b>1323.1639</b> | 2628.2940      | <b>1314.6506</b> | 2627.3100        | <b>1314.1586</b> | 23 |
| 16 | <b>1721.8163</b> | <b>861.4118</b>  | 1704.7898        | 852.8985         | 1703.8057        | 852.4065         | E    | 2530.2936 | <b>1265.6505</b> | 2513.2671      | 1257.1372        | 2512.2831        | 1256.6452        | 22 |
| 17 | <b>1849.8749</b> | <b>925.4411</b>  | 1832.8483        | 916.9278         | 1831.8643        | 916.4358         | Q    | 2401.2510 | <b>1201.1292</b> | 2384.2245      | 1192.6159        | 2383.2405        | 1192.1239        | 21 |
| 18 | 2035.9542        | <b>1018.4807</b> | 2018.9277        | <b>1009.9675</b> | 2017.9436        | <b>1009.4755</b> | W    | 2273.1925 | <b>1137.0999</b> | 2256.1659      | <b>1128.5866</b> | 2255.1819        | <b>1128.0946</b> | 20 |
| 19 | 2149.0383        | <b>1075.0228</b> | 2132.0117        | 1066.5095        | 2131.0277        | 1066.0175        | L    | 2087.1131 | 1044.0602        | 2070.0866      | 1035.5469        | 2069.1026        | 1035.0549        | 19 |
| 20 | 2262.1223        | <b>1131.5648</b> | 2245.0958        | 1123.0515        | 2244.1118        | 1122.5595        | L    | 1974.0291 | <b>987.5182</b>  | 1957.0025      | 979.0049         | <b>1956.0185</b> | 978.5129         | 18 |
| 21 | 2363.1700        | <b>1182.0886</b> | 2346.1435        | 1173.5754        | 2345.1594        | 1173.0834        | T    | 1860.9450 | <b>930.9761</b>  | 1843.9185      | 922.4629         | 1842.9345        | 921.9709         | 17 |
| 22 | 2464.2177        | <b>1232.6125</b> | 2447.1911        | <b>1224.0992</b> | 2446.2071        | <b>1223.6072</b> | T    | 1759.8973 | <b>880.4523</b>  | 1742.8708      | 871.9390         | 1741.8868        | 871.4470         | 16 |

|    |           |           |           |           |           |           |   |           |          |           |          |           |          |    |
|----|-----------|-----------|-----------|-----------|-----------|-----------|---|-----------|----------|-----------|----------|-----------|----------|----|
| 23 | 2535.2548 | 1268.1310 | 2518.2283 | 1259.6178 | 2517.2442 | 1259.1258 | A | 1658.8497 | 829.9285 | 1641.8231 | 821.4152 | 1640.8391 | 820.9232 | 15 |
| 24 | 2663.3498 | 1332.1785 | 2646.3232 | 1323.6652 | 2645.3392 | 1323.1732 | K | 1587.8125 | 794.4099 | 1570.7860 | 785.8966 | 1569.8020 | 785.4046 | 14 |
| 25 | 2777.3927 | 1389.2000 | 2760.3661 | 1380.6867 | 2759.3821 | 1380.1947 | N | 1459.7176 | 730.3624 | 1442.6910 | 721.8492 | 1441.7070 | 721.3571 | 13 |
| 26 | 2890.4768 | 1445.7420 | 2873.4502 | 1437.2287 | 2872.4662 | 1436.7367 | L | 1345.6747 | 673.3410 | 1328.6481 | 664.8277 | 1327.6641 | 664.3357 | 12 |
| 27 | 3037.5452 | 1519.2762 | 3020.5186 | 1510.7629 | 3019.5346 | 1510.2709 | F | 1232.5906 | 616.7989 | 1215.5640 | 608.2857 | 1214.5800 | 607.7937 | 11 |
| 28 | 3150.6292 | 1575.8183 | 3133.6027 | 1567.3050 | 3132.6187 | 1566.8130 | L | 1085.5222 | 543.2647 | 1068.4956 | 534.7515 | 1067.5116 | 534.2594 | 10 |
| 29 | 3264.6722 | 1632.8397 | 3247.6456 | 1624.3264 | 3246.6616 | 1623.8344 | N | 972.4381  | 486.7227 | 955.4116  | 478.2094 | 954.4275  | 477.7174 | 9  |
| 30 | 3401.7311 | 1701.3692 | 3384.7045 | 1692.8559 | 3383.7205 | 1692.3639 | H | 858.3952  | 429.7012 | 841.3686  | 421.1880 | 840.3846  | 420.6959 | 8  |
| 31 | 3488.7631 | 1744.8852 | 3471.7366 | 1736.3719 | 3470.7525 | 1735.8799 | S | 721.3363  | 361.1718 | 704.3097  | 352.6585 | 703.3257  | 352.1665 | 7  |
| 32 | 3617.8057 | 1809.4065 | 3600.7791 | 1800.8932 | 3599.7951 | 1800.4012 | E | 634.3042  | 317.6558 | 617.2777  | 309.1425 | 616.2937  | 308.6505 | 6  |
| 33 | 3732.8326 | 1866.9200 | 3715.8061 | 1858.4067 | 3714.8221 | 1857.9147 | N | 505.2617  | 253.1345 | 488.2351  | 244.6212 | 487.2511  | 244.1292 | 5  |
| 34 | 3803.8698 | 1902.4385 | 3786.8432 | 1893.9252 | 3785.8592 | 1893.4332 | A | 390.2347  | 195.6210 | 373.2082  | 187.1077 | 372.2241  | 186.6157 | 4  |
| 35 | 3904.9174 | 1952.9624 | 3887.8909 | 1944.4491 | 3886.9069 | 1943.9571 | T | 319.1976  | 160.1024 | 302.1710  | 151.5892 | 301.1870  | 151.0972 | 3  |
| 36 | 3975.9545 | 1988.4809 | 3958.9280 | 1979.9676 | 3957.9440 | 1979.4756 | A | 218.1499  | 109.5786 | 201.1234  | 101.0653 |           |          | 2  |
| 37 |           |           |           |           |           |           | K | 147.1128  | 74.0600  | 130.0863  | 65.5468  |           |          | 1  |

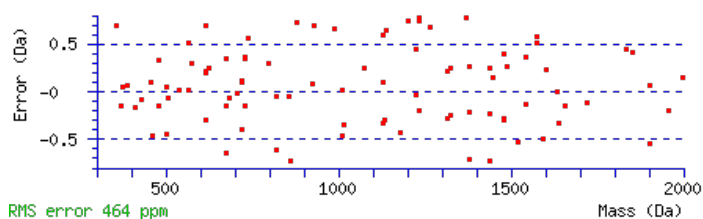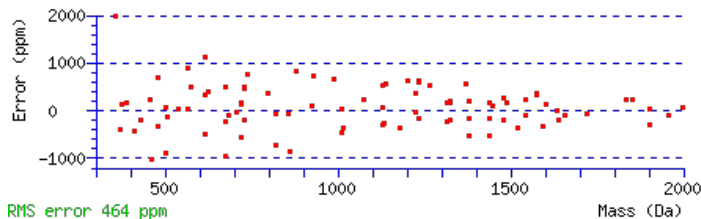

NCBI BLAST search of [MVSHHNLTTGATLINEQWLLTTAKNLFNLHSENATAK](#)

(Parameters: blastp, nr protein database, expect=20000, no filter, PAM30)

Other BLAST [web gateways](#)

All matches to this query

| Score | Mr(calc)  | Delta  | Sequence                                              | Site Analysis                  |
|-------|-----------|--------|-------------------------------------------------------|--------------------------------|
| 123.4 | 4121.0527 | 0.0163 | <a href="#">MVSHHNLTTGATLINEQWLLTTAKNLFNLHSENATAK</a> | Deamidated N6, N15, N33 81.52% |
| 116.1 | 4121.0527 | 0.0163 | <a href="#">MVSHHNLTTGATLINEQWLLTTAKNLFNLHSENATAK</a> | Deamidated N6, N29, N33 15.35% |
| 107.3 | 4121.0527 | 0.0163 | <a href="#">MVSHHNLTTGATLINEQWLLTTAKNLFNLHSENATAK</a> | Deamidated N25, N29, N33 1.99% |
| 104.4 | 4121.0527 | 0.0163 | <a href="#">MVSHHNLTTGATLINEQWLLTTAKNLFNLHSENATAK</a> | Deamidated N15, Q17, N25 1.02% |
| 99.6  | 4120.0687 | 1.0003 | <a href="#">MVSHHNLTTGATLINEQWLLTTAKNLFNLHSENATAK</a> |                                |
| 91.0  | 4120.0687 | 1.0003 | <a href="#">MVSHHNLTTGATLINEQWLLTTAKNLFNLHSENATAK</a> |                                |
| 90.3  | 4121.0527 | 0.0163 | <a href="#">MVSHHNLTTGATLINEQWLLTTAKNLFNLHSENATAK</a> | Deamidated Q17, N25, N29 0.04% |
| 87.1  | 4120.0687 | 1.0003 | <a href="#">MVSHHNLTTGATLINEQWLLTTAKNLFNLHSENATAK</a> |                                |
| 86.7  | 4120.0687 | 1.0003 | <a href="#">MVSHHNLTTGATLINEQWLLTTAKNLFNLHSENATAK</a> |                                |
| 82.6  | 4120.0687 | 1.0003 | <a href="#">MVSHHNLTTGATLINEQWLLTTAKNLFNLHSENATAK</a> |                                |

Mascot: <http://www.matrixscience.com/>



# MASCOT SCIENCE Mascot Search Results

## Peptide View

MS/MS Fragmentation of **MVSHHNLTTGATLINEQWLLTTAKNLFNLHSEENATAK**

Found in **J3QR68** in **con\_Xuniprot\_HUMAN3**, J3QR68\_HUMAN Haptoglobin (Fragment) OS=Homo sapiens GN=HP PE=3 SV=1

Match to Query 28817: 4137.065456 from(1035.273640,4+) intensity(69579.8750) rtinseconds(2601) scans(6545) index(26282)

Title: 111019\_Est\_MI\_YS\_G\_08Spectrum5692\_scans\_\_6545

Data file C:\mascot\20140703\_Tmgf\_1D\CSV\_UseAnalysis\MasterCSV\All\_Glyco\mgf\ptm\UC18ERLIC\_PTM\_35D.mgf

Click mouse within plot area to zoom in by factor of two about that point

Or, to Da

Label all possible matches Label matches used for scoring

Show Y-axis

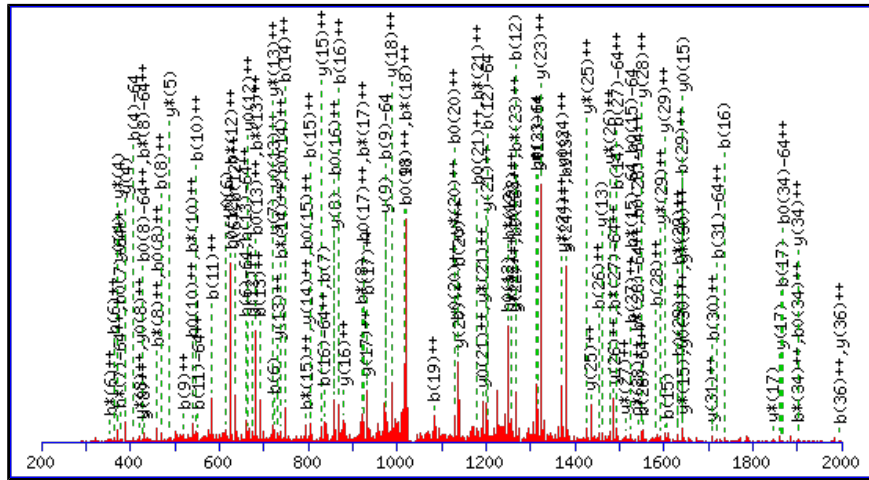

Monoisotopic mass of neutral peptide Mr(calc): 4137.0477

Fixed modifications: Carbamidomethyl (C) (apply to specified residues or termini only)

Variable modifications:

M1 : Oxidation (M), with neutral losses 0.0000(shown in table), 63.9983

N6 : Deamidated (NQ)

N29 : Deamidated (NQ)

N33 : Deamidated (NQ)

Ions Score: 120 Expect: 2.1e-010

Matches : 135/616 fragment ions using 174 most intense peaks (help)

| #  | b         | b <sup>++</sup> | b <sup>*</sup> | b <sup>*++</sup> | b <sup>0</sup> | b <sup>0++</sup> | Seq. | y         | y <sup>++</sup> | y <sup>*</sup> | y <sup>*++</sup> | y <sup>0</sup> | y <sup>0++</sup> | #  |
|----|-----------|-----------------|----------------|------------------|----------------|------------------|------|-----------|-----------------|----------------|------------------|----------------|------------------|----|
| 1  | 148.0427  | 74.5250         |                |                  |                |                  | M    |           |                 |                |                  |                |                  | 37 |
| 2  | 247.1111  | 124.0592        |                |                  |                |                  | V    | 3991.0196 | 1996.0134       | 3973.9930      | 1987.5002        | 3973.0090      | 1987.0081        | 36 |
| 3  | 334.1431  | 167.5752        |                |                  | 316.1326       | 158.5699         | S    | 3891.9512 | 1946.4792       | 3874.9246      | 1937.9660        | 3873.9406      | 1937.4739        | 35 |
| 4  | 471.2020  | 236.1047        |                |                  | 453.1915       | 227.0994         | H    | 3804.9191 | 1902.9632       | 3787.8926      | 1894.4499        | 3786.9086      | 1893.9579        | 34 |
| 5  | 608.2609  | 304.6341        |                |                  | 590.2504       | 295.6288         | H    | 3667.8602 | 1834.4338       | 3650.8337      | 1825.9205        | 3649.8497      | 1825.4285        | 33 |
| 6  | 723.2879  | 362.1476        | 706.2613       | 353.6343         | 705.2773       | 353.1423         | N    | 3530.8013 | 1765.9043       | 3513.7748      | 1757.3910        | 3512.7908      | 1756.8990        | 32 |
| 7  | 836.3719  | 418.6896        | 819.3454       | 410.1763         | 818.3614       | 409.6843         | L    | 3415.7744 | 1708.3908       | 3398.7478      | 1699.8776        | 3397.7638      | 1699.3855        | 31 |
| 8  | 937.4196  | 469.2135        | 920.3931       | 460.7002         | 919.4091       | 460.2082         | T    | 3302.6903 | 1651.8488       | 3285.6638      | 1643.3355        | 3284.6798      | 1642.8435        | 30 |
| 9  | 1038.4673 | 519.7373        | 1021.4408      | 511.2240         | 1020.4567      | 510.7320         | T    | 3201.6426 | 1601.3250       | 3184.6161      | 1592.8117        | 3183.6321      | 1592.3197        | 29 |
| 10 | 1095.4888 | 548.2480        | 1078.4622      | 539.7347         | 1077.4782      | 539.2427         | G    | 3100.5950 | 1550.8011       | 3083.5684      | 1542.2878        | 3082.5844      | 1541.7958        | 28 |
| 11 | 1166.5259 | 583.7666        | 1149.4993      | 575.2533         | 1148.5153      | 574.7613         | A    | 3043.5735 | 1522.2904       | 3026.5469      | 1513.7771        | 3025.5629      | 1513.2851        | 27 |
| 12 | 1267.5736 | 634.2904        | 1250.5470      | 625.7771         | 1249.5630      | 625.2851         | T    | 2972.5364 | 1486.7718       | 2955.5098      | 1478.2586        | 2954.5258      | 1477.7665        | 26 |
| 13 | 1380.6576 | 690.8325        | 1363.6311      | 682.3192         | 1362.6471      | 681.8272         | L    | 2871.4887 | 1436.2480       | 2854.4622      | 1427.7347        | 2853.4781      | 1427.2427        | 25 |
| 14 | 1493.7417 | 747.3745        | 1476.7151      | 738.8612         | 1475.7311      | 738.3692         | I    | 2758.4046 | 1379.7060       | 2741.3781      | 1371.1927        | 2740.3941      | 1370.7007        | 24 |
| 15 | 1607.7846 | 804.3959        | 1590.7581      | 795.8827         | 1589.7741      | 795.3907         | N    | 2645.3206 | 1323.1639       | 2628.2940      | 1314.6506        | 2627.3100      | 1314.1586        | 23 |
| 16 | 1736.8272 | 868.9172        | 1719.8007      | 860.4040         | 1718.8166      | 859.9120         | E    | 2531.2776 | 1266.1425       | 2514.2511      | 1257.6292        | 2513.2671      | 1257.1372        | 22 |
| 17 | 1864.8858 | 932.9465        | 1847.8592      | 924.4333         | 1846.8752      | 923.9413         | Q    | 2402.2351 | 1201.6212       | 2385.2085      | 1193.1079        | 2384.2245      | 1192.6159        | 21 |
| 18 | 2050.9651 | 1025.9862       | 2033.9386      | 1017.4729        | 2032.9545      | 1016.9809        | W    | 2274.1765 | 1137.5919       | 2257.1499      | 1129.0786        | 2256.1659      | 1128.5866        | 20 |
| 19 | 2164.0492 | 1082.5282       | 2147.0226      | 1074.0149        | 2146.0386      | 1073.5229        | L    | 2088.0972 | 1044.5522       | 2071.0706      | 1036.0389        | 2070.0866      | 1035.5469        | 19 |
| 20 | 2277.1332 | 1139.0703       | 2260.1067      | 1130.5570        | 2259.1227      | 1130.0650        | L    | 1975.0131 | 988.0102        | 1957.9865      | 979.4969         | 1957.0025      | 979.0049         | 18 |
| 21 | 2378.1809 | 1189.5941       | 2361.1544      | 1181.0808        | 2360.1703      | 1180.5888        | T    | 1861.9290 | 931.4682        | 1844.9025      | 922.9549         | 1843.9185      | 922.4629         | 17 |

|    |           |           |           |           |           |           |   |           |          |           |          |           |          |    |
|----|-----------|-----------|-----------|-----------|-----------|-----------|---|-----------|----------|-----------|----------|-----------|----------|----|
| 22 | 2479.2286 | 1240.1179 | 2462.2020 | 1231.6047 | 2461.2180 | 1231.1126 | T | 1760.8814 | 880.9443 | 1743.8548 | 872.4310 | 1742.8708 | 871.9390 | 16 |
| 23 | 2550.2657 | 1275.6365 | 2533.2392 | 1267.1232 | 2532.2551 | 1266.6312 | A | 1659.8337 | 830.4205 | 1642.8071 | 821.9072 | 1641.8231 | 821.4152 | 15 |
| 24 | 2678.3607 | 1339.6840 | 2661.3341 | 1331.1707 | 2660.3501 | 1330.6787 | K | 1588.7966 | 794.9019 | 1571.7700 | 786.3886 | 1570.7860 | 785.8966 | 14 |
| 25 | 2792.4036 | 1396.7054 | 2775.3770 | 1388.1922 | 2774.3930 | 1387.7002 | N | 1460.7016 | 730.8544 | 1443.6750 | 722.3412 | 1442.6910 | 721.8492 | 13 |
| 26 | 2905.4877 | 1453.2475 | 2888.4611 | 1444.7342 | 2887.4771 | 1444.2422 | L | 1346.6587 | 673.8330 | 1329.6321 | 665.3197 | 1328.6481 | 664.8277 | 12 |
| 27 | 3052.5561 | 1526.7817 | 3035.5295 | 1518.2684 | 3034.5455 | 1517.7764 | F | 1233.5746 | 617.2909 | 1216.5481 | 608.7777 | 1215.5640 | 608.2857 | 11 |
| 28 | 3165.6401 | 1583.3237 | 3148.6136 | 1574.8104 | 3147.6296 | 1574.3184 | L | 1086.5062 | 543.7567 | 1069.4796 | 535.2435 | 1068.4956 | 534.7515 | 10 |
| 29 | 3280.6671 | 1640.8372 | 3263.6405 | 1632.3239 | 3262.6565 | 1631.8319 | N | 973.4221  | 487.2147 | 956.3956  | 478.7014 | 955.4116  | 478.2094 | 9  |
| 30 | 3417.7260 | 1709.3666 | 3400.6994 | 1700.8534 | 3399.7154 | 1700.3614 | H | 858.3952  | 429.7012 | 841.3686  | 421.1880 | 840.3846  | 420.6959 | 8  |
| 31 | 3504.7580 | 1752.8826 | 3487.7315 | 1744.3694 | 3486.7475 | 1743.8774 | S | 721.3363  | 361.1718 | 704.3097  | 352.6585 | 703.3257  | 352.1665 | 7  |
| 32 | 3633.8006 | 1817.4039 | 3616.7741 | 1808.8907 | 3615.7900 | 1808.3987 | E | 634.3042  | 317.6558 | 617.2777  | 309.1425 | 616.2937  | 308.6505 | 6  |
| 33 | 3748.8276 | 1874.9174 | 3731.8010 | 1866.4041 | 3730.8170 | 1865.9121 | N | 505.2617  | 253.1345 | 488.2351  | 244.6212 | 487.2511  | 244.1292 | 5  |
| 34 | 3819.8647 | 1910.4360 | 3802.8381 | 1901.9227 | 3801.8541 | 1901.4307 | A | 390.2347  | 195.6210 | 373.2082  | 187.1077 | 372.2241  | 186.6157 | 4  |
| 35 | 3920.9123 | 1960.9598 | 3903.8858 | 1952.4465 | 3902.9018 | 1951.9545 | T | 319.1976  | 160.1024 | 302.1710  | 151.5892 | 301.1870  | 151.0972 | 3  |
| 36 | 3991.9495 | 1996.4784 | 3974.9229 | 1987.9651 | 3973.9389 | 1987.4731 | A | 218.1499  | 109.5786 | 201.1234  | 101.0653 |           |          | 2  |
| 37 |           |           |           |           |           |           | K | 147.1128  | 74.0600  | 130.0863  | 65.5468  |           |          | 1  |

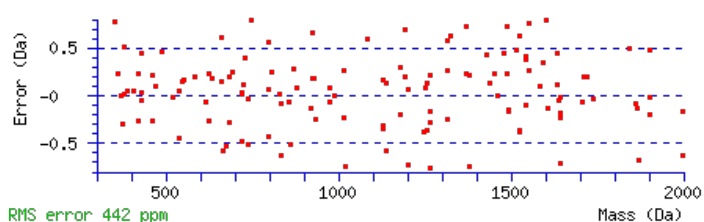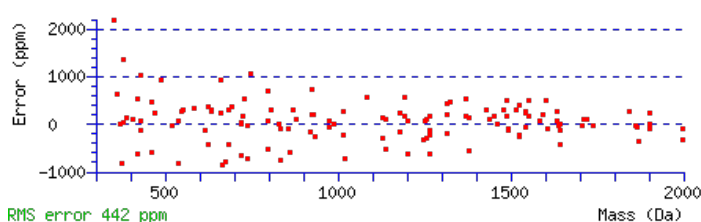

NCBI BLAST search of [MVSHHNLTGATLINEQWLLTTAKNLFNLHSENATAK](#)

(Parameters: blastp, nr protein database, expect=20000, no filter, PAM30)

Other BLAST [web gateways](#)

All matches to this query

| Score | Mr(calc)  | Delta  | Sequence                                             | Site Analysis                  |
|-------|-----------|--------|------------------------------------------------------|--------------------------------|
| 120.0 | 4137.0477 | 0.0178 | <a href="#">MVSHHNLTGATLINEQWLLTTAKNLFNLHSENATAK</a> | Deamidated N6, N29, N33 99.88% |
| 88.7  | 4136.0636 | 1.0018 | <a href="#">MVSHHNLTGATLINEQWLLTTAKNLFNLHSENATAK</a> |                                |
| 85.8  | 4136.0636 | 1.0018 | <a href="#">MVSHHNLTGATLINEQWLLTTAKNLFNLHSENATAK</a> |                                |
| 85.7  | 4137.0477 | 0.0178 | <a href="#">MVSHHNLTGATLINEQWLLTTAKNLFNLHSENATAK</a> | Deamidated N6, N15, N33 0.04%  |
| 82.2  | 4137.0477 | 0.0178 | <a href="#">MVSHHNLTGATLINEQWLLTTAKNLFNLHSENATAK</a> | Deamidated N25, N29, N33 0.02% |
| 81.5  | 4136.0636 | 1.0018 | <a href="#">MVSHHNLTGATLINEQWLLTTAKNLFNLHSENATAK</a> |                                |
| 79.3  | 4136.0636 | 1.0018 | <a href="#">MVSHHNLTGATLINEQWLLTTAKNLFNLHSENATAK</a> |                                |
| 78.5  | 4136.0636 | 1.0018 | <a href="#">MVSHHNLTGATLINEQWLLTTAKNLFNLHSENATAK</a> |                                |
| 77.6  | 4136.0636 | 1.0018 | <a href="#">MVSHHNLTGATLINEQWLLTTAKNLFNLHSENATAK</a> |                                |
| 76.6  | 4136.0636 | 1.0018 | <a href="#">MVSHHNLTGATLINEQWLLTTAKNLFNLHSENATAK</a> |                                |

Mascot: <http://www.matrixscience.com/>



# MATRIX SCIENCE Mascot Search Results

## Peptide View

MS/MS Fragmentation of **MVSHHNLTTGATLINEQWLLTTAKNLFNLHSEENATAK**

Found in **J3QR68** in **con\_Xuniprot\_HUMAN3**, J3QR68\_HUMAN Haptoglobin (Fragment) OS=Homo sapiens GN=HP PE=3 SV=1

Match to Query 28857: 4137.071576 from(1035.275170,4+) intensity(220692.9375) rtinseconds(2414) scans(6158) index(12860)

Title: 111019\_Est\_ISCardio\_NMI\_YS\_G\_9Spectrum5411\_scans\_\_6158

Data file C:\mascot\20140703\_Tmgf\_1D\CSV\_UseAnalysis\MasterCSV\All\_Glyco\mgf\ptm\UC18ERLIC\_PTM\_35D.mgf

Click mouse within plot area to zoom in by factor of two about that point

Or, to Da

Label all possible matches Label matches used for scoring

Show Y-axis

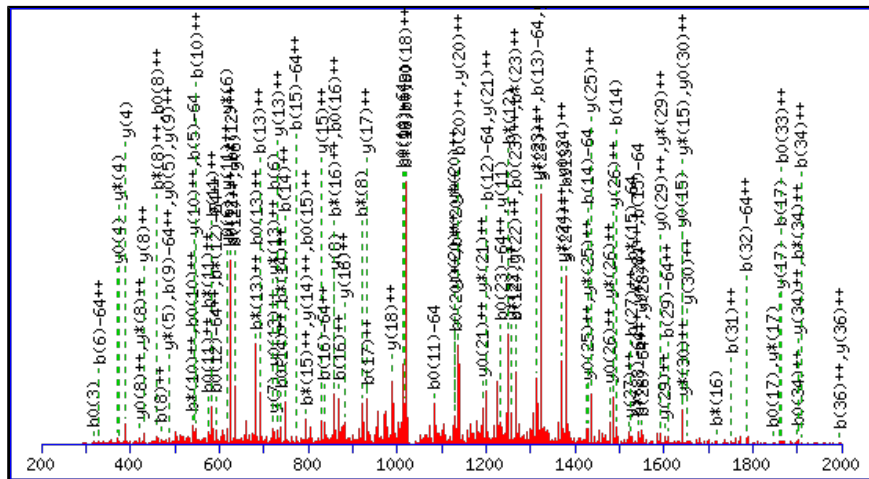

Monoisotopic mass of neutral peptide Mr(calc): 4136.0636

Fixed modifications: Carbamidomethyl (C) (apply to specified residues or termini only)

Variable modifications:

M1 : Oxidation (M), with neutral losses 0.0000 (shown in table), 63.9983

N29 : Deamidated (NQ)

N33 : Deamidated (NQ)

Ions Score: 119 Expect: 2.5e-010

Matches : 129/616 fragment ions using 155 most intense peaks ([help](#))

| #  | b         | b <sup>++</sup> | b <sup>*</sup> | b <sup>*++</sup> | b <sup>0</sup> | b <sup>0++</sup> | Seq. | y         | y <sup>++</sup> | y <sup>*</sup> | y <sup>*++</sup> | y <sup>0</sup> | y <sup>0++</sup> | #  |
|----|-----------|-----------------|----------------|------------------|----------------|------------------|------|-----------|-----------------|----------------|------------------|----------------|------------------|----|
| 1  | 148.0427  | 74.5250         |                |                  |                |                  | M    |           |                 |                |                  |                |                  | 37 |
| 2  | 247.1111  | 124.0592        |                |                  |                |                  | V    | 3990.0356 | 1995.5214       | 3973.0090      | 1987.0081        | 3972.0250      | 1986.5161        | 36 |
| 3  | 334.1431  | 167.5752        |                |                  | 316.1326       | 158.5699         | S    | 3890.9672 | 1945.9872       | 3873.9406      | 1937.4739        | 3872.9566      | 1936.9819        | 35 |
| 4  | 471.2020  | 236.1047        |                |                  | 453.1915       | 227.0994         | H    | 3803.9351 | 1902.4712       | 3786.9086      | 1893.9579        | 3785.9246      | 1893.4659        | 34 |
| 5  | 608.2609  | 304.6341        |                |                  | 590.2504       | 295.6288         | H    | 3666.8762 | 1833.9417       | 3649.8497      | 1825.4285        | 3648.8657      | 1824.9365        | 33 |
| 6  | 722.3039  | 361.6556        | 705.2773       | 353.1423         | 704.2933       | 352.6503         | N    | 3529.8173 | 1765.4123       | 3512.7908      | 1756.8990        | 3511.8067      | 1756.4070        | 32 |
| 7  | 835.3879  | 418.1976        | 818.3614       | 409.6843         | 817.3774       | 409.1923         | L    | 3415.7744 | 1708.3908       | 3398.7478      | 1699.8776        | 3397.7638      | 1699.3855        | 31 |
| 8  | 936.4356  | 468.7214        | 919.4091       | 460.2082         | 918.4250       | 459.7162         | T    | 3302.6903 | 1651.8488       | 3285.6638      | 1643.3355        | 3284.6798      | 1642.8435        | 30 |
| 9  | 1037.4833 | 519.2453        | 1020.4567      | 510.7320         | 1019.4727      | 510.2400         | T    | 3201.6426 | 1601.3250       | 3184.6161      | 1592.8117        | 3183.6321      | 1592.3197        | 29 |
| 10 | 1094.5048 | 547.7560        | 1077.4782      | 539.2427         | 1076.4942      | 538.7507         | G    | 3100.5950 | 1550.8011       | 3083.5684      | 1542.2878        | 3082.5844      | 1541.7958        | 28 |
| 11 | 1165.5419 | 583.2746        | 1148.5153      | 574.7613         | 1147.5313      | 574.2693         | A    | 3043.5735 | 1522.2904       | 3026.5469      | 1513.7771        | 3025.5629      | 1513.2851        | 27 |
| 12 | 1266.5895 | 633.7984        | 1249.5630      | 625.2851         | 1248.5790      | 624.7931         | T    | 2972.5364 | 1486.7718       | 2955.5098      | 1478.2586        | 2954.5258      | 1477.7665        | 26 |
| 13 | 1379.6736 | 690.3404        | 1362.6471      | 681.8272         | 1361.6630      | 681.3352         | L    | 2871.4887 | 1436.2480       | 2854.4622      | 1427.7347        | 2853.4781      | 1427.2427        | 25 |
| 14 | 1492.7577 | 746.8825        | 1475.7311      | 738.3692         | 1474.7471      | 737.8772         | I    | 2758.4046 | 1379.7060       | 2741.3781      | 1371.1927        | 2740.3941      | 1370.7007        | 24 |
| 15 | 1606.8006 | 803.9039        | 1589.7741      | 795.3907         | 1588.7900      | 794.8987         | N    | 2645.3206 | 1323.1639       | 2628.2940      | 1314.6506        | 2627.3100      | 1314.1586        | 23 |
| 16 | 1735.8432 | 868.4252        | 1718.8166      | 859.9120         | 1717.8326      | 859.4200         | E    | 2531.2776 | 1266.1425       | 2514.2511      | 1257.6292        | 2513.2671      | 1257.1372        | 22 |
| 17 | 1863.9018 | 932.4545        | 1846.8752      | 923.9413         | 1845.8912      | 923.4492         | Q    | 2402.2351 | 1201.6212       | 2385.2085      | 1193.1079        | 2384.2245      | 1192.6159        | 21 |
| 18 | 2049.9811 | 1025.4942       | 2032.9545      | 1016.9809        | 2031.9705      | 1016.4889        | W    | 2274.1765 | 1137.5919       | 2257.1499      | 1129.0786        | 2256.1659      | 1128.5866        | 20 |
| 19 | 2163.0652 | 1082.0362       | 2146.0386      | 1073.5229        | 2145.0546      | 1073.0309        | L    | 2088.0972 | 1044.5522       | 2071.0706      | 1036.0389        | 2070.0866      | 1035.5469        | 19 |
| 20 | 2276.1492 | 1138.5782       | 2259.1227      | 1130.0650        | 2258.1386      | 1129.5730        | L    | 1975.0131 | 988.0102        | 1957.9865      | 979.4969         | 1957.0025      | 979.0049         | 18 |
| 21 | 2377.1969 | 1189.1021       | 2360.1703      | 1180.5888        | 2359.1863      | 1180.0968        | T    | 1861.9290 | 931.4682        | 1844.9025      | 922.9549         | 1843.9185      | 922.4629         | 17 |
| 22 | 2478.2446 | 1239.6259       | 2461.2180      | 1231.1126        | 2460.2340      | 1230.6206        | T    | 1760.8814 | 880.9443        | 1743.8548      | 872.4310         | 1742.8708      | 871.9390         | 16 |

|    |           |           |           |           |           |           |   |           |          |           |          |           |          |    |
|----|-----------|-----------|-----------|-----------|-----------|-----------|---|-----------|----------|-----------|----------|-----------|----------|----|
| 23 | 2549.2817 | 1275.1445 | 2532.2551 | 1266.6312 | 2531.2711 | 1266.1392 | A | 1659.8337 | 830.4205 | 1642.8071 | 821.9072 | 1641.8231 | 821.4152 | 15 |
| 24 | 2677.3766 | 1339.1920 | 2660.3501 | 1330.6787 | 2659.3661 | 1330.1867 | K | 1588.7966 | 794.9019 | 1571.7700 | 786.3886 | 1570.7860 | 785.8966 | 14 |
| 25 | 2791.4196 | 1396.2134 | 2774.3930 | 1387.7002 | 2773.4090 | 1387.2081 | N | 1460.7016 | 730.8544 | 1443.6751 | 722.3412 | 1442.6910 | 721.8492 | 13 |
| 26 | 2904.5036 | 1452.7555 | 2887.4771 | 1444.2422 | 2886.4931 | 1443.7502 | L | 1346.6587 | 673.8330 | 1329.6321 | 665.3197 | 1328.6481 | 664.8277 | 12 |
| 27 | 3051.5721 | 1526.2897 | 3034.5455 | 1517.7764 | 3033.5615 | 1517.2844 | F | 1233.5746 | 617.2909 | 1216.5481 | 608.7777 | 1215.5640 | 608.2857 | 11 |
| 28 | 3164.6561 | 1582.8317 | 3147.6296 | 1574.3184 | 3146.6456 | 1573.8264 | L | 1086.5062 | 543.7567 | 1069.4796 | 535.2435 | 1068.4956 | 534.7515 | 10 |
| 29 | 3279.6831 | 1640.3452 | 3262.6565 | 1631.8319 | 3261.6725 | 1631.3399 | N | 973.4221  | 487.2147 | 956.3956  | 478.7014 | 955.4116  | 478.2094 | 9  |
| 30 | 3416.7420 | 1708.8746 | 3399.7154 | 1700.3614 | 3398.7314 | 1699.8693 | H | 858.3952  | 429.7012 | 841.3686  | 421.1880 | 840.3846  | 420.6959 | 8  |
| 31 | 3503.7740 | 1752.3906 | 3486.7475 | 1743.8774 | 3485.7634 | 1743.3854 | S | 721.3363  | 361.1718 | 704.3097  | 352.6585 | 703.3257  | 352.1665 | 7  |
| 32 | 3632.8166 | 1816.9119 | 3615.7900 | 1808.3987 | 3614.8060 | 1807.9067 | E | 634.3042  | 317.6558 | 617.2777  | 309.1425 | 616.2937  | 308.6505 | 6  |
| 33 | 3747.8435 | 1874.4254 | 3730.8170 | 1865.9121 | 3729.8330 | 1865.4201 | N | 505.2617  | 253.1345 | 488.2351  | 244.6212 | 487.2511  | 244.1292 | 5  |
| 34 | 3818.8807 | 1909.9440 | 3801.8541 | 1901.4307 | 3800.8701 | 1900.9387 | A | 390.2347  | 195.6210 | 373.2082  | 187.1077 | 372.2241  | 186.6157 | 4  |
| 35 | 3919.9283 | 1960.4678 | 3902.9018 | 1951.9545 | 3901.9178 | 1951.4625 | T | 319.1976  | 160.1024 | 302.1710  | 151.5892 | 301.1870  | 151.0972 | 3  |
| 36 | 3990.9654 | 1995.9864 | 3973.9389 | 1987.4731 | 3972.9549 | 1986.9811 | A | 218.1499  | 109.5786 | 201.1234  | 101.0653 |           |          | 2  |
| 37 |           |           |           |           |           |           | K | 147.1128  | 74.0600  | 130.0863  | 65.5468  |           |          | 1  |

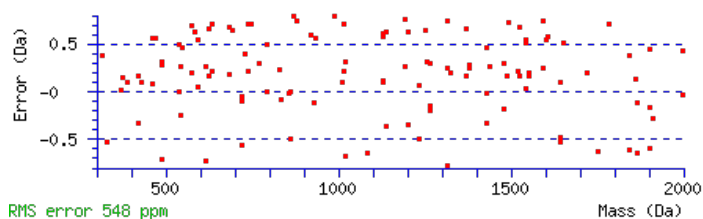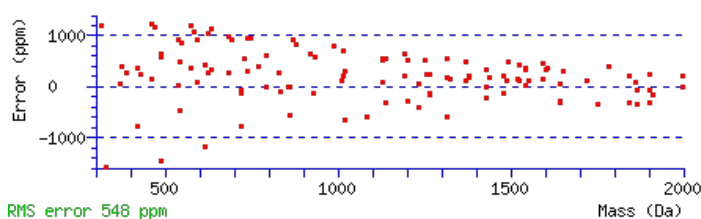

NCBI BLAST search of [MVSHHNLTTGATLINEQWLLTTAKNLFNLHSENATAK](#)

(Parameters: blastp, nr protein database, expect=20000, no filter, PAM30)

Other BLAST [web gateways](#)

All matches to this query

| Score | Mr(calc)  | Delta  | Sequence                                              | Site Analysis              |
|-------|-----------|--------|-------------------------------------------------------|----------------------------|
| 119.0 | 4136.0636 | 1.0079 | <a href="#">MVSHHNLTTGATLINEQWLLTTAKNLFNLHSENATAK</a> | Deamidated N29, N33 84.39% |
| 110.8 | 4136.0636 | 1.0079 | <a href="#">MVSHHNLTTGATLINEQWLLTTAKNLFNLHSENATAK</a> | Deamidated N25, N33 12.69% |
| 104.3 | 4136.0636 | 1.0079 | <a href="#">MVSHHNLTTGATLINEQWLLTTAKNLFNLHSENATAK</a> | Deamidated N25, N29 2.87%  |
| 83.3  | 4136.0636 | 1.0079 | <a href="#">MVSHHNLTTGATLINEQWLLTTAKNLFNLHSENATAK</a> | Deamidated Q17, N29 0.02%  |
| 76.6  | 4136.0636 | 1.0079 | <a href="#">MVSHHNLTTGATLINEQWLLTTAKNLFNLHSENATAK</a> | Deamidated N15, N29 0.00%  |
| 75.7  | 4136.0636 | 1.0079 | <a href="#">MVSHHNLTTGATLINEQWLLTTAKNLFNLHSENATAK</a> | Deamidated Q17, N25 0.00%  |
| 75.3  | 4136.0636 | 1.0079 | <a href="#">MVSHHNLTTGATLINEQWLLTTAKNLFNLHSENATAK</a> | Deamidated Q17, N33 0.00%  |
| 74.6  | 4136.0636 | 1.0079 | <a href="#">MVSHHNLTTGATLINEQWLLTTAKNLFNLHSENATAK</a> | Deamidated N6, N29 0.00%   |
| 72.5  | 4136.0636 | 1.0079 | <a href="#">MVSHHNLTTGATLINEQWLLTTAKNLFNLHSENATAK</a> | Deamidated N6, N33 0.00%   |
| 72.2  | 4136.0636 | 1.0079 | <a href="#">MVSHHNLTTGATLINEQWLLTTAKNLFNLHSENATAK</a> | Deamidated N6, N25 0.00%   |

Mascot: <http://www.matrixscience.com/>

# MASCOT SCIENCE Mascot Search Results

## Peptide View

MS/MS Fragmentation of **MVSHHNLTTGATLINEQWLLTTAKNLFNLHSENAK**

Found in **J3QR68** in **con\_Xuniprot\_HUMAN3**, J3QR68\_HUMAN Haptoglobin (Fragment) OS=Homo sapiens GN=HP PE=3 SV=1

Match to Query 28870: 4137.072816 from(1035.275480,4+) intensity(477273.9688) rtinseconds(2527) scans(6845) index(24173)

Title: 111019\_Est\_MI\_YS\_G\_05Spectrum5941\_scans\_\_6845

Data file C:\mascot\20140703\_Tmgf\_1D\CSV\_UseAnalysis\MasterCSV\All\_Glyco\mgf\ptm\UC18ERLIC\_PTM\_35D.mgf

Click mouse within plot area to zoom in by factor of two about that point

Or, to Da

Label all possible matches Label matches used for scoring

Show Y-axis

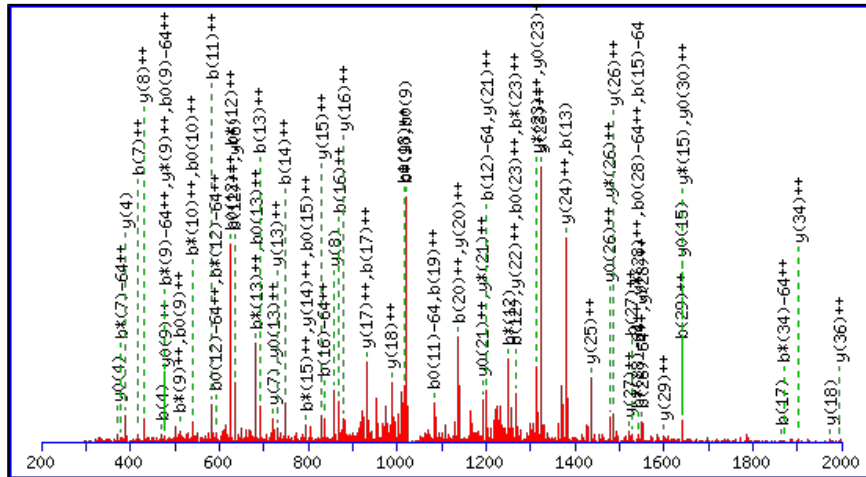

Monoisotopic mass of neutral peptide Mr(calc): 4136.0636

Fixed modifications: Carbamidomethyl (C) (apply to specified residues or termini only)

Variable modifications:

M1 : Oxidation (M), with neutral losses 0.0000 (shown in table), 63.9983

N25 : Deamidated (NQ)

N33 : Deamidated (NQ)

Ions Score: 118 Expect: 2.9e-010

Matches : 82/616 fragment ions using 85 most intense peaks ([help](#))

| #  | b                | b <sup>++</sup>  | b <sup>*</sup>   | b <sup>*++</sup> | b <sup>0</sup>   | b <sup>0++</sup> | Seq. | y                | y <sup>++</sup>  | y <sup>*</sup> | y <sup>*++</sup> | y <sup>0</sup> | y <sup>0++</sup> | #  |
|----|------------------|------------------|------------------|------------------|------------------|------------------|------|------------------|------------------|----------------|------------------|----------------|------------------|----|
| 1  | 148.0427         | 74.5250          |                  |                  |                  |                  | M    |                  |                  |                |                  |                |                  | 37 |
| 2  | 247.1111         | 124.0592         |                  |                  |                  |                  | V    | 3990.0356        | 1995.5214        | 3973.0090      | 1987.0081        | 3972.0250      | 1986.5161        | 36 |
| 3  | 334.1431         | 167.5752         |                  |                  | 316.1326         | 158.5699         | S    | 3890.9672        | 1945.9872        | 3873.9406      | 1937.4739        | 3872.9566      | 1936.9819        | 35 |
| 4  | <b>471.2020</b>  | 236.1047         |                  |                  | 453.1915         | 227.0994         | H    | 3803.9351        | <b>1902.4712</b> | 3786.9086      | 1893.9579        | 3785.9246      | 1893.4659        | 34 |
| 5  | 608.2609         | 304.6341         |                  |                  | 590.2504         | 295.6288         | H    | 3666.8762        | 1833.9417        | 3649.8497      | 1825.4285        | 3648.8657      | 1824.9365        | 33 |
| 6  | 722.3039         | 361.6556         | 705.2773         | 353.1423         | 704.2933         | 352.6503         | N    | 3529.8173        | 1765.4123        | 3512.7908      | 1756.8990        | 3511.8067      | 1756.4070        | 32 |
| 7  | 835.3879         | <b>418.1976</b>  | 818.3614         | 409.6843         | 817.3774         | 409.1923         | L    | 3415.7744        | 1708.3908        | 3398.7478      | 1699.8776        | 3397.7638      | 1699.3855        | 31 |
| 8  | 936.4356         | 468.7214         | 919.4091         | 460.2082         | 918.4250         | 459.7162         | T    | 3302.6903        | 1651.8488        | 3285.6638      | 1643.3355        | 3284.6798      | <b>1642.8435</b> | 30 |
| 9  | 1037.4833        | 519.2453         | <b>1020.4567</b> | <b>510.7320</b>  | <b>1019.4727</b> | <b>510.2400</b>  | T    | 3201.6426        | <b>1601.3250</b> | 3184.6161      | 1592.8117        | 3183.6321      | 1592.3197        | 29 |
| 10 | 1094.5048        | 547.7560         | 1077.4782        | <b>539.2427</b>  | 1076.4942        | <b>538.7507</b>  | G    | 3100.5950        | <b>1550.8011</b> | 3083.5684      | <b>1542.2878</b> | 3082.5844      | 1541.7958        | 28 |
| 11 | 1165.5419        | <b>583.2746</b>  | 1148.5153        | 574.7613         | 1147.5313        | 574.2693         | A    | 3043.5735        | <b>1522.2904</b> | 3026.5469      | 1513.7771        | 3025.5629      | 1513.2851        | 27 |
| 12 | <b>1266.5895</b> | <b>633.7984</b>  | <b>1249.5630</b> | <b>625.2851</b>  | 1248.5790        | <b>624.7931</b>  | T    | 2972.5364        | <b>1486.7718</b> | 2955.5098      | <b>1478.2586</b> | 2954.5258      | <b>1477.7665</b> | 26 |
| 13 | <b>1379.6736</b> | <b>690.3404</b>  | 1362.6471        | <b>681.8272</b>  | 1361.6630        | <b>681.3352</b>  | L    | 2871.4887        | <b>1436.2480</b> | 2854.4622      | 1427.7347        | 2853.4781      | 1427.2427        | 25 |
| 14 | 1492.7577        | <b>746.8825</b>  | 1475.7311        | 738.3692         | 1474.7471        | 737.8772         | I    | 2758.4046        | <b>1379.7060</b> | 2741.3781      | 1371.1927        | 2740.3941      | 1370.7007        | 24 |
| 15 | 1606.8006        | 803.9039         | 1589.7741        | <b>795.3907</b>  | 1588.7900        | <b>794.8987</b>  | N    | 2645.3206        | <b>1323.1639</b> | 2628.2940      | <b>1314.6506</b> | 2627.3100      | <b>1314.1586</b> | 23 |
| 16 | 1735.8432        | <b>868.4252</b>  | 1718.8166        | 859.9120         | 1717.8326        | 859.4200         | E    | 2531.2776        | <b>1266.1425</b> | 2514.2511      | 1257.6292        | 2513.2671      | 1257.1372        | 22 |
| 17 | <b>1863.9018</b> | <b>932.4545</b>  | 1846.8752        | 923.9413         | 1845.8912        | 923.4492         | Q    | 2402.2351        | <b>1201.6212</b> | 2385.2085      | <b>1193.1079</b> | 2384.2245      | <b>1192.6159</b> | 21 |
| 18 | 2049.9811        | 1025.4942        | 2032.9545        | 1016.9809        | 2031.9705        | <b>1016.4889</b> | W    | 2274.1765        | <b>1137.5919</b> | 2257.1499      | 1129.0786        | 2256.1659      | 1128.5866        | 20 |
| 19 | 2163.0652        | <b>1082.0362</b> | 2146.0386        | 1073.5229        | 2145.0546        | 1073.0309        | L    | 2088.0972        | 1044.5522        | 2071.0706      | 1036.0389        | 2070.0866      | 1035.5469        | 19 |
| 20 | 2276.1492        | <b>1138.5782</b> | 2259.1227        | 1130.0650        | 2258.1386        | 1129.5730        | L    | <b>1975.0131</b> | <b>988.0102</b>  | 1957.9865      | 979.4969         | 1957.0025      | 979.0049         | 18 |
| 21 | 2377.1969        | 1189.1021        | 2360.1703        | 1180.5888        | 2359.1863        | 1180.0968        | T    | 1861.9290        | <b>931.4682</b>  | 1844.9025      | 922.9549         | 1843.9185      | 922.4629         | 17 |
| 22 | 2478.2446        | 1239.6259        | 2461.2180        | 1231.1126        | 2460.2340        | 1230.6206        | T    | 1760.8814        | <b>880.9443</b>  | 1743.8548      | 872.4310         | 1742.8708      | 871.9390         | 16 |

|    |           |           |           |           |           |           |   |           |          |           |          |           |          |    |
|----|-----------|-----------|-----------|-----------|-----------|-----------|---|-----------|----------|-----------|----------|-----------|----------|----|
| 23 | 2549.2817 | 1275.1445 | 2532.2551 | 1266.6312 | 2531.2711 | 1266.1392 | A | 1659.8337 | 830.4205 | 1642.8071 | 821.9072 | 1641.8231 | 821.4152 | 15 |
| 24 | 2677.3766 | 1339.1920 | 2660.3501 | 1330.6787 | 2659.3661 | 1330.1867 | K | 1588.7966 | 794.9019 | 1571.7700 | 786.3886 | 1570.7860 | 785.8966 | 14 |
| 25 | 2792.4036 | 1396.7054 | 2775.3770 | 1388.1922 | 2774.3930 | 1387.7002 | N | 1460.7016 | 730.8544 | 1443.6751 | 722.3412 | 1442.6910 | 721.8492 | 13 |
| 26 | 2905.4877 | 1453.2475 | 2888.4611 | 1444.7342 | 2887.4771 | 1444.2422 | L | 1345.6747 | 673.3410 | 1328.6481 | 664.8277 | 1327.6641 | 664.3357 | 12 |
| 27 | 3052.5561 | 1526.7817 | 3035.5295 | 1518.2684 | 3034.5455 | 1517.7764 | F | 1232.5906 | 616.7989 | 1215.5640 | 608.2857 | 1214.5800 | 607.7937 | 11 |
| 28 | 3165.6401 | 1583.3237 | 3148.6136 | 1574.8104 | 3147.6296 | 1574.3184 | L | 1085.5222 | 543.2647 | 1068.4956 | 534.7515 | 1067.5116 | 534.2594 | 10 |
| 29 | 3279.6831 | 1640.3452 | 3262.6565 | 1631.8319 | 3261.6725 | 1631.3399 | N | 972.4381  | 486.7227 | 955.4116  | 478.2094 | 954.4275  | 477.7174 | 9  |
| 30 | 3416.7420 | 1708.8746 | 3399.7154 | 1700.3614 | 3398.7314 | 1699.8693 | H | 858.3952  | 429.7012 | 841.3686  | 421.1880 | 840.3846  | 420.6959 | 8  |
| 31 | 3503.7740 | 1752.3906 | 3486.7475 | 1743.8774 | 3485.7634 | 1743.3854 | S | 721.3363  | 361.1718 | 704.3097  | 352.6585 | 703.3257  | 352.1665 | 7  |
| 32 | 3632.8166 | 1816.9119 | 3615.7900 | 1808.3987 | 3614.8060 | 1807.9067 | E | 634.3042  | 317.6558 | 617.2777  | 309.1425 | 616.2937  | 308.6505 | 6  |
| 33 | 3747.8435 | 1874.4254 | 3730.8170 | 1865.9121 | 3729.8330 | 1865.4201 | N | 505.2617  | 253.1345 | 488.2351  | 244.6212 | 487.2511  | 244.1292 | 5  |
| 34 | 3818.8807 | 1909.9440 | 3801.8541 | 1901.4307 | 3800.8701 | 1900.9387 | A | 390.2347  | 195.6210 | 373.2082  | 187.1077 | 372.2241  | 186.6157 | 4  |
| 35 | 3919.9283 | 1960.4678 | 3902.9018 | 1951.9545 | 3901.9178 | 1951.4625 | T | 319.1976  | 160.1024 | 302.1710  | 151.5892 | 301.1870  | 151.0972 | 3  |
| 36 | 3990.9654 | 1995.9864 | 3973.9389 | 1987.4731 | 3972.9549 | 1986.9811 | A | 218.1499  | 109.5786 | 201.1234  | 101.0653 |           |          | 2  |
| 37 |           |           |           |           |           |           | K | 147.1128  | 74.0600  | 130.0863  | 65.5468  |           |          | 1  |

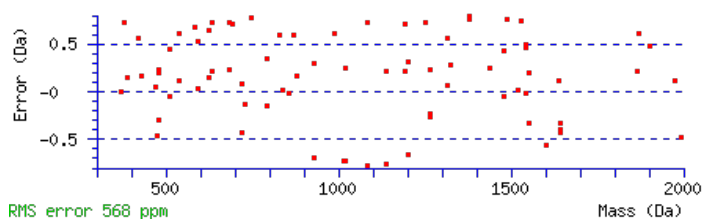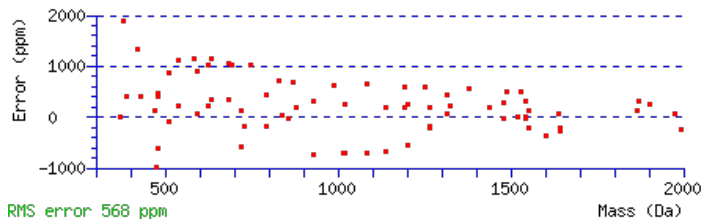

NCBI BLAST search of [MVSHHNLTTGATLINEQWLLTTAKNLFNLHSENATAK](#)

(Parameters: blastp, nr protein database, expect=20000, no filter, PAM30)

Other BLAST [web gateways](#)

All matches to this query

| Score | Mr(calc)  | Delta  | Sequence                                              | Site Analysis              |
|-------|-----------|--------|-------------------------------------------------------|----------------------------|
| 118.2 | 4136.0636 | 1.0092 | <a href="#">MVSHHNLTTGATLINEQWLLTTAKNLFNLHSENATAK</a> | Deamidated N25, N33 74.93% |
| 113.2 | 4136.0636 | 1.0092 | <a href="#">MVSHHNLTTGATLINEQWLLTTAKNLFNLHSENATAK</a> | Deamidated N29, N33 23.42% |
| 100.5 | 4136.0636 | 1.0092 | <a href="#">MVSHHNLTTGATLINEQWLLTTAKNLFNLHSENATAK</a> | Deamidated N25, N29 1.26%  |
| 94.1  | 4136.0636 | 1.0092 | <a href="#">MVSHHNLTTGATLINEQWLLTTAKNLFNLHSENATAK</a> | Deamidated Q17, N33 0.29%  |
| 85.1  | 4136.0636 | 1.0092 | <a href="#">MVSHHNLTTGATLINEQWLLTTAKNLFNLHSENATAK</a> | Deamidated N15, N33 0.04%  |
| 84.1  | 4136.0636 | 1.0092 | <a href="#">MVSHHNLTTGATLINEQWLLTTAKNLFNLHSENATAK</a> | Deamidated N6, N33 0.03%   |
| 79.7  | 4136.0636 | 1.0092 | <a href="#">MVSHHNLTTGATLINEQWLLTTAKNLFNLHSENATAK</a> | Deamidated Q17, N29 0.01%  |
| 79.7  | 4136.0636 | 1.0092 | <a href="#">MVSHHNLTTGATLINEQWLLTTAKNLFNLHSENATAK</a> | Deamidated Q17, N25 0.01%  |
| 70.3  | 4136.0636 | 1.0092 | <a href="#">MVSHHNLTTGATLINEQWLLTTAKNLFNLHSENATAK</a> | Deamidated N15, N29 0.00%  |
| 70.3  | 4136.0636 | 1.0092 | <a href="#">MVSHHNLTTGATLINEQWLLTTAKNLFNLHSENATAK</a> | Deamidated N15, N25 0.00%  |

Mascot: <http://www.matrixscience.com/>

# MASCOT SCIENCE Mascot Search Results

## Peptide View

MS/MS Fragmentation of **MVSHHNLTTGATLINEQWLLTTAKNLFNLHSENAK**

Found in **J3QR68** in **con\_Xuniprot\_HUMAN3**, J3QR68\_HUMAN Haptoglobin (Fragment) OS=Homo sapiens GN=HP PE=3 SV=1

Match to Query 28595: 4122.050176 from(1031.519820,4+) intensity(34464.0820) rtinseconds(2545) scans(6632) index(4038)

Title: 111019\_Est\_ISCardio\_NMI\_YP\_G\_6Spectrum5425\_scans\_\_6632

Data file C:\mascot\20140703\_Tmgf\_1D\CSV\_UseAnalysis\MasterCSV\All\_Glyco\mgf\ptm\UC18ERLIC\_PTM\_35D.mgf

Click mouse within plot area to zoom in by factor of two about that point

Or,  to  Da

Label all possible matches  Label matches used for scoring

Show Y-axis

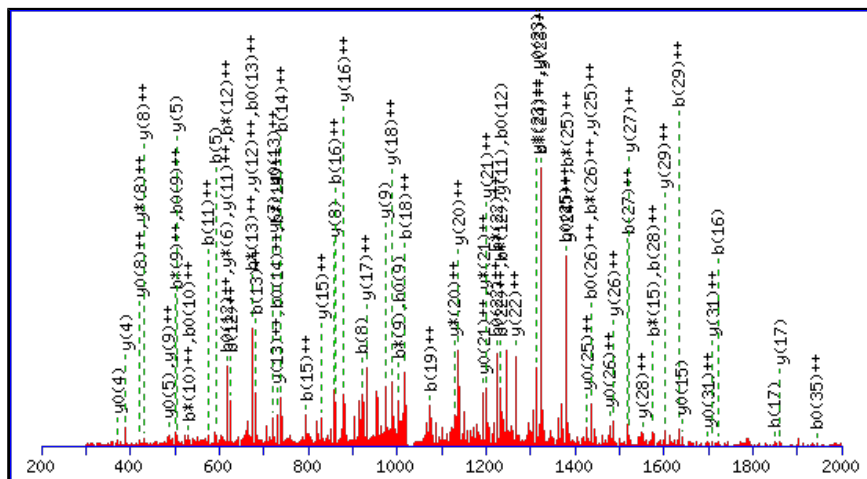

Monoisotopic mass of neutral peptide Mr(calc): 4122.0367

Fixed modifications: Carbamidomethyl (C) (apply to specified residues or termini only)

Variable modifications:

N15 : Deamidated (NQ)

Q17 : Deamidated (NQ)

N29 : Deamidated (NQ)

N33 : Deamidated (NQ)

Ions Score: 118 Expect: 3.3e-010

Matches : 82/414 fragment ions using 103 most intense peaks [\(help\)](#)

| #  | b                | b <sup>++</sup>  | b <sup>*</sup>   | b <sup>*++</sup> | b <sup>0</sup>   | b <sup>0++</sup> | Seq. | y                | y <sup>++</sup>  | y <sup>*</sup> | y <sup>*++</sup> | y <sup>0</sup> | y <sup>0++</sup> | #  |
|----|------------------|------------------|------------------|------------------|------------------|------------------|------|------------------|------------------|----------------|------------------|----------------|------------------|----|
| 1  | 132.0478         | 66.5275          |                  |                  |                  |                  | M    |                  |                  |                |                  |                |                  | 37 |
| 2  | 231.1162         | 116.0617         |                  |                  |                  |                  | V    | 3992.0036        | 1996.5054        | 3974.9771      | 1987.9922        | 3973.9930      | 1987.5002        | 36 |
| 3  | 318.1482         | 159.5777         |                  |                  | 300.1376         | 150.5725         | S    | 3892.9352        | 1946.9712        | 3875.9086      | 1938.4580        | 3874.9246      | 1937.9660        | 35 |
| 4  | 455.2071         | 228.1072         |                  |                  | 437.1966         | 219.1019         | H    | 3805.9032        | 1903.4552        | 3788.8766      | 1894.9419        | 3787.8926      | 1894.4499        | 34 |
| 5  | <b>592.2660</b>  | 296.6367         |                  |                  | 574.2555         | 287.6314         | H    | 3668.8443        | 1834.9258        | 3651.8177      | 1826.4125        | 3650.8337      | 1825.9205        | 33 |
| 6  | 706.3090         | 353.6581         | 689.2824         | 345.1448         | 688.2984         | 344.6528         | N    | 3531.7853        | 1766.3963        | 3514.7588      | 1757.8830        | 3513.7748      | 1757.3910        | 32 |
| 7  | 819.3930         | 410.2001         | 802.3665         | 401.6869         | 801.3825         | 401.1949         | L    | 3417.7424        | <b>1709.3748</b> | 3400.7159      | 1700.8616        | 3399.7318      | <b>1700.3696</b> | 31 |
| 8  | <b>920.4407</b>  | 460.7240         | 903.4141         | 452.2107         | 902.4301         | 451.7187         | T    | 3304.6583        | 1652.8328        | 3287.6318      | 1644.3195        | 3286.6478      | 1643.8275        | 30 |
| 9  | 1021.4884        | 511.2478         | <b>1004.4618</b> | <b>502.7346</b>  | <b>1003.4778</b> | <b>502.2425</b>  | T    | 3203.6107        | <b>1602.3090</b> | 3186.5841      | 1593.7957        | 3185.6001      | 1593.3037        | 29 |
| 10 | 1078.5098        | 539.7586         | 1061.4833        | <b>531.2453</b>  | 1060.4993        | <b>530.7533</b>  | G    | 3102.5630        | <b>1551.7851</b> | 3085.5364      | 1543.2719        | 3084.5524      | 1542.7799        | 28 |
| 11 | 1149.5470        | <b>575.2771</b>  | 1132.5204        | 566.7638         | 1131.5364        | 566.2718         | A    | 3045.5415        | <b>1523.2744</b> | 3028.5150      | 1514.7611        | 3027.5310      | 1514.2691        | 27 |
| 12 | 1250.5946        | <b>625.8010</b>  | <b>1233.5681</b> | <b>617.2877</b>  | <b>1232.5841</b> | <b>616.7957</b>  | T    | 2974.5044        | <b>1487.7558</b> | 2957.4779      | 1479.2426        | 2956.4938      | <b>1478.7506</b> | 26 |
| 13 | 1363.6787        | <b>682.3430</b>  | 1346.6521        | <b>673.8297</b>  | 1345.6681        | <b>673.3377</b>  | L    | 2873.4567        | <b>1437.2320</b> | 2856.4302      | 1428.7187        | 2855.4462      | <b>1428.2267</b> | 25 |
| 14 | 1476.7628        | <b>738.8850</b>  | 1459.7362        | <b>730.3717</b>  | 1458.7522        | <b>729.8797</b>  | I    | 2760.3727        | <b>1380.6900</b> | 2743.3461      | 1372.1767        | 2742.3621      | 1371.6847        | 24 |
| 15 | 1591.7897        | <b>796.3985</b>  | <b>1574.7632</b> | 787.8852         | 1573.7791        | 787.3932         | N    | 2647.2886        | <b>1324.1479</b> | 2630.2621      | <b>1315.6347</b> | 2629.2780      | <b>1315.1427</b> | 23 |
| 16 | <b>1720.8323</b> | <b>860.9198</b>  | 1703.8057        | 852.4065         | 1702.8217        | 851.9145         | E    | 2532.2617        | <b>1266.6345</b> | 2515.2351      | 1258.1212        | 2514.2511      | 1257.6292        | 22 |
| 17 | <b>1849.8749</b> | 925.4411         | 1832.8483        | 916.9278         | 1831.8643        | 916.4358         | Q    | 2403.2191        | <b>1202.1132</b> | 2386.1925      | <b>1193.5999</b> | 2385.2085      | <b>1193.1079</b> | 21 |
| 18 | 2035.9542        | <b>1018.4807</b> | 2018.9277        | 1009.9675        | 2017.9436        | 1009.4755        | W    | 2274.1765        | <b>1137.5919</b> | 2257.1499      | <b>1129.0786</b> | 2256.1659      | 1128.5866        | 20 |
| 19 | 2149.0383        | <b>1075.0228</b> | 2132.0117        | 1066.5095        | 2131.0277        | 1066.0175        | L    | 2088.0972        | 1044.5522        | 2071.0706      | 1036.0389        | 2070.0866      | 1035.5469        | 19 |
| 20 | 2262.1223        | 1131.5648        | 2245.0958        | 1123.0515        | 2244.1118        | 1122.5595        | L    | 1975.0131        | <b>988.0102</b>  | 1957.9865      | 979.4969         | 1957.0025      | 979.0049         | 18 |
| 21 | 2363.1700        | 1182.0886        | 2346.1435        | 1173.5754        | 2345.1594        | 1173.0834        | T    | <b>1861.9290</b> | <b>931.4682</b>  | 1844.9025      | 922.9549         | 1843.9185      | 922.4629         | 17 |



|    |           |                  |           |                  |           |                  |   |                  |                 |                 |                 |                  |                 |           |
|----|-----------|------------------|-----------|------------------|-----------|------------------|---|------------------|-----------------|-----------------|-----------------|------------------|-----------------|-----------|
| 22 | 2464.2177 | <b>1232.6125</b> | 2447.1911 | <b>1224.0992</b> | 2446.2071 | <b>1223.6072</b> | T | 1760.8814        | <b>880.9443</b> | 1743.8548       | 872.4310        | 1742.8708        | 871.9390        | <b>16</b> |
| 23 | 2535.2548 | 1268.1310        | 2518.2283 | 1259.6178        | 2517.2442 | 1259.1258        | A | 1659.8337        | <b>830.4205</b> | 1642.8071       | 821.9072        | <b>1641.8231</b> | 821.4152        | <b>15</b> |
| 24 | 2663.3498 | 1332.1785        | 2646.3232 | <b>1323.6652</b> | 2645.3392 | <b>1323.1732</b> | K | 1588.7966        | 794.9019        | 1571.7700       | 786.3886        | 1570.7860        | 785.8966        | <b>14</b> |
| 25 | 2777.3927 | 1389.2000        | 2760.3661 | <b>1380.6867</b> | 2759.3821 | <b>1380.1947</b> | N | 1460.7016        | <b>730.8544</b> | 1443.6751       | 722.3412        | 1442.6910        | <b>721.8492</b> | <b>13</b> |
| 26 | 2890.4768 | 1445.7420        | 2873.4502 | <b>1437.2287</b> | 2872.4662 | <b>1436.7367</b> | L | 1346.6587        | <b>673.8330</b> | 1329.6321       | 665.3197        | 1328.6481        | 664.8277        | <b>12</b> |
| 27 | 3037.5452 | <b>1519.2762</b> | 3020.5186 | 1510.7629        | 3019.5346 | 1510.2709        | F | <b>1233.5746</b> | <b>617.2909</b> | 1216.5481       | 608.7777        | 1215.5640        | 608.2857        | <b>11</b> |
| 28 | 3150.6292 | <b>1575.8183</b> | 3133.6027 | 1567.3050        | 3132.6187 | 1566.8130        | L | 1086.5062        | 543.7567        | 1069.4796       | 535.2435        | 1068.4956        | 534.7515        | <b>10</b> |
| 29 | 3265.6562 | <b>1633.3317</b> | 3248.6296 | 1624.8185        | 3247.6456 | 1624.3264        | N | <b>973.4221</b>  | <b>487.2147</b> | 956.3956        | 478.7014        | 955.4116         | 478.2094        | <b>9</b>  |
| 30 | 3402.7151 | 1701.8612        | 3385.6885 | 1693.3479        | 3384.7045 | 1692.8559        | H | <b>858.3952</b>  | <b>429.7012</b> | 841.3686        | <b>421.1880</b> | 840.3846         | <b>420.6959</b> | <b>8</b>  |
| 31 | 3489.7471 | 1745.3772        | 3472.7206 | 1736.8639        | 3471.7366 | 1736.3719        | S | <b>721.3363</b>  | 361.1718        | 704.3097        | 352.6585        | 703.3257         | 352.1665        | <b>7</b>  |
| 32 | 3618.7897 | 1809.8985        | 3601.7632 | 1801.3852        | 3600.7791 | 1800.8932        | E | 634.3042         | 317.6558        | <b>617.2777</b> | 309.1425        | 616.2937         | 308.6505        | <b>6</b>  |
| 33 | 3733.8167 | 1867.4120        | 3716.7901 | 1858.8987        | 3715.8061 | 1858.4067        | N | <b>505.2617</b>  | 253.1345        | 488.2351        | 244.6212        | <b>487.2511</b>  | 244.1292        | <b>5</b>  |
| 34 | 3804.8538 | 1902.9305        | 3787.8272 | 1894.4172        | 3786.8432 | 1893.9252        | A | <b>390.2347</b>  | 195.6210        | 373.2082        | 187.1077        | <b>372.2241</b>  | 186.6157        | <b>4</b>  |
| 35 | 3905.9014 | 1953.4544        | 3888.8749 | 1944.9411        | 3887.8909 | <b>1944.4491</b> | T | 319.1976         | 160.1024        | 302.1710        | 151.5892        | 301.1870         | 151.0972        | <b>3</b>  |
| 36 | 3976.9386 | 1988.9729        | 3959.9120 | 1980.4596        | 3958.9280 | 1979.9676        | A | 218.1499         | 109.5786        | 201.1234        | 101.0653        |                  |                 | <b>2</b>  |
| 37 |           |                  |           |                  |           |                  | K | 147.1128         | 74.0600         | 130.0863        | 65.5468         |                  |                 | <b>1</b>  |

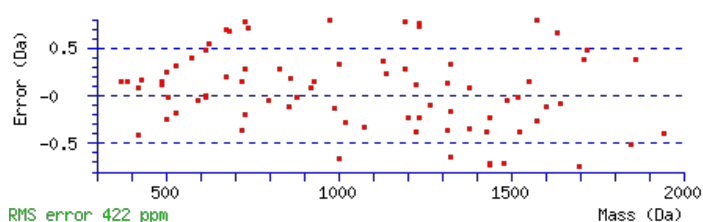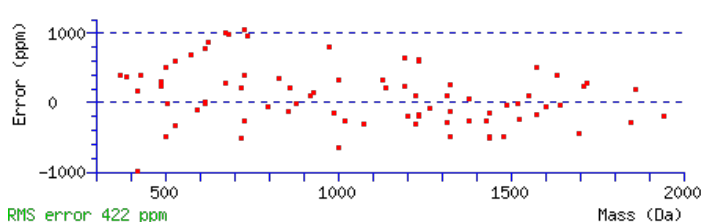

NCBI BLAST search of [MVSHHNLTTGATLINEQWLLTTAKNLFNLHSENATAK](#)

(Parameters: blastp, nr protein database, expect=20000, no filter, PAM30)

Other BLAST [web gateways](#)

All matches to this query

| Score | Mr(calc)  | Delta  | Sequence                                              | Site Analysis                        |
|-------|-----------|--------|-------------------------------------------------------|--------------------------------------|
| 117.9 | 4122.0367 | 0.0134 | <a href="#">MVSHHNLTTGATLINEQWLLTTAKNLFNLHSENATAK</a> | Deamidated N15, Q17, N29, N33 19.71% |
| 116.5 | 4122.0367 | 0.0134 | <a href="#">MVSHHNLTTGATLINEQWLLTTAKNLFNLHSENATAK</a> | Deamidated N15, N25, N29, N33 14.21% |
| 115.9 | 4122.0367 | 0.0134 | <a href="#">MVSHHNLTTGATLINEQWLLTTAKNLFNLHSENATAK</a> | Deamidated N6, Q17, N29, N33 12.61%  |
| 115.9 | 4122.0367 | 0.0134 | <a href="#">MVSHHNLTTGATLINEQWLLTTAKNLFNLHSENATAK</a> | Deamidated N6, N15, N29, N33 12.61%  |
| 114.6 | 4122.0367 | 0.0134 | <a href="#">MVSHHNLTTGATLINEQWLLTTAKNLFNLHSENATAK</a> | Deamidated N6, Q17, N25, N33 9.26%   |
| 114.6 | 4122.0367 | 0.0134 | <a href="#">MVSHHNLTTGATLINEQWLLTTAKNLFNLHSENATAK</a> | Deamidated N6, N15, N25, N33 9.26%   |
| 113.4 | 4122.0367 | 0.0134 | <a href="#">MVSHHNLTTGATLINEQWLLTTAKNLFNLHSENATAK</a> | Deamidated N6, N25, N29, N33 7.04%   |
| 113.1 | 4122.0367 | 0.0134 | <a href="#">MVSHHNLTTGATLINEQWLLTTAKNLFNLHSENATAK</a> | Deamidated N15, Q17, N25, N33 6.63%  |
| 108.2 | 4121.0527 | 0.9974 | <a href="#">MVSHHNLTTGATLINEQWLLTTAKNLFNLHSENATAK</a> |                                      |
| 106.7 | 4122.0367 | 0.0134 | <a href="#">MVSHHNLTTGATLINEQWLLTTAKNLFNLHSENATAK</a> | Deamidated N6, N15, Q17, N33 1.50%   |

Mascot: <http://www.matrixscience.com/>

# MASCOT SCIENCE Mascot Search Results

## Peptide View

MS/MS Fragmentation of **MVSHHNLTTGATLINEQWLLTTAKNLFNLHSEENATAK**

Found in **J3QR68** in **con\_Xuniprot\_HUMAN3**, J3QR68\_HUMAN Haptoglobin (Fragment) OS=Homo sapiens GN=HP PE=3 SV=1

Match to Query 28597: 4122.054256 from(1031.520840,4+) intensity(25418.1895) rtinseconds(2552) scans(6742) index(18938)

Title: 111019\_Est\_MI\_YP\_G\_08Spectrum5890\_scans\_\_6742

Data file C:\mascot\20140703\_Tmgf\_1D\CSV\_UseAnalysis\MasterCSV\All\_Glyco\mgf\ptm\UC18ERLIC\_PTM\_35D.mgf

Click mouse within plot area to zoom in by factor of two about that point

Or,  to  Da

Label all possible matches  Label matches used for scoring

Show Y-axis

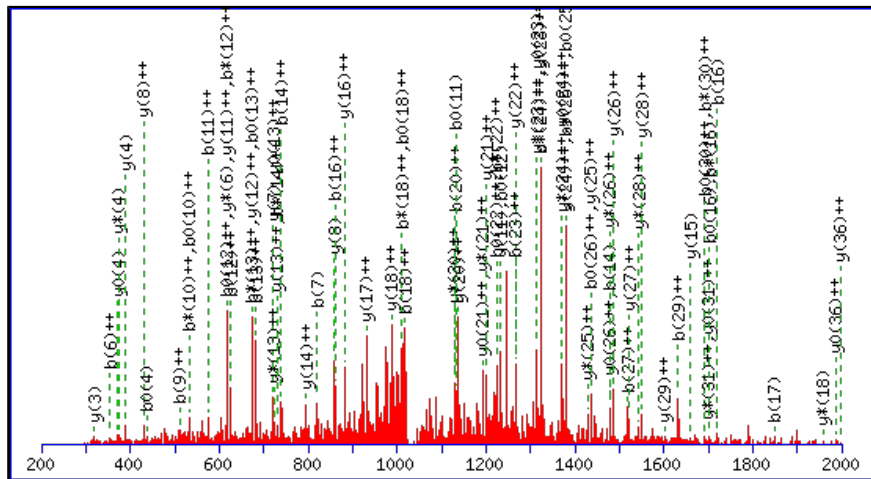

Monoisotopic mass of neutral peptide Mr(calc): 4122.0367

Fixed modifications: Carbamidomethyl (C) (apply to specified residues or termini only)

Variable modifications:

N6 : Deamidated (NQ)

Q17 : Deamidated (NQ)

N29 : Deamidated (NQ)

N33 : Deamidated (NQ)

Ions Score: 114 Expect: 8.9e-010

Matches : 84/414 fragment ions using 103 most intense peaks [\(help\)](#)

| #  | b         | b <sup>++</sup> | b <sup>*</sup> | b <sup>*++</sup> | b <sup>0</sup> | b <sup>0++</sup> | Seq. | y         | y <sup>++</sup> | y <sup>*</sup> | y <sup>*++</sup> | y <sup>0</sup> | y <sup>0++</sup> | #  |
|----|-----------|-----------------|----------------|------------------|----------------|------------------|------|-----------|-----------------|----------------|------------------|----------------|------------------|----|
| 1  | 132.0478  | 66.5275         |                |                  |                |                  | M    |           |                 |                |                  |                |                  | 37 |
| 2  | 231.1162  | 116.0617        |                |                  |                |                  | V    | 3992.0036 | 1996.5054       | 3974.9771      | 1987.9922        | 3973.9930      | 1987.5002        | 36 |
| 3  | 318.1482  | 159.5777        |                |                  | 300.1376       | 150.5725         | S    | 3892.9352 | 1946.9712       | 3875.9086      | 1938.4580        | 3874.9246      | 1937.9660        | 35 |
| 4  | 455.2071  | 228.1072        |                |                  | 437.1966       | 219.1019         | H    | 3805.9032 | 1903.4552       | 3788.8766      | 1894.9419        | 3787.8926      | 1894.4499        | 34 |
| 5  | 592.2660  | 296.6367        |                |                  | 574.2555       | 287.6314         | H    | 3668.8443 | 1834.9258       | 3651.8177      | 1826.4125        | 3650.8337      | 1825.9205        | 33 |
| 6  | 707.2930  | 354.1501        | 690.2664       | 345.6368         | 689.2824       | 345.1448         | N    | 3531.7853 | 1766.3963       | 3514.7588      | 1757.8830        | 3513.7748      | 1757.3910        | 32 |
| 7  | 820.3770  | 410.6922        | 803.3505       | 402.1789         | 802.3665       | 401.6869         | L    | 3416.7584 | 1708.8828       | 3399.7318      | 1700.3696        | 3398.7478      | 1699.8776        | 31 |
| 8  | 921.4247  | 461.2160        | 904.3982       | 452.7027         | 903.4141       | 452.2107         | T    | 3303.6743 | 1652.3408       | 3286.6478      | 1643.8275        | 3285.6638      | 1643.3355        | 30 |
| 9  | 1022.4724 | 511.7398        | 1005.4458      | 503.2266         | 1004.4618      | 502.7346         | T    | 3202.6267 | 1601.8170       | 3185.6001      | 1593.3037        | 3184.6161      | 1592.8117        | 29 |
| 10 | 1079.4939 | 540.2506        | 1062.4673      | 531.7373         | 1061.4833      | 531.2453         | G    | 3101.5790 | 1551.2931       | 3084.5524      | 1542.7799        | 3083.5684      | 1542.2878        | 28 |
| 11 | 1150.5310 | 575.7691        | 1133.5044      | 567.2558         | 1132.5204      | 566.7638         | A    | 3044.5575 | 1522.7824       | 3027.5310      | 1514.2691        | 3026.5469      | 1513.7771        | 27 |
| 12 | 1251.5786 | 626.2930        | 1234.5521      | 617.7797         | 1233.5681      | 617.2877         | T    | 2973.5204 | 1487.2638       | 2956.4938      | 1478.7506        | 2955.5098      | 1478.2586        | 26 |
| 13 | 1364.6627 | 682.8350        | 1347.6362      | 674.3217         | 1346.6521      | 673.8297         | L    | 2872.4727 | 1436.7400       | 2855.4462      | 1428.2267        | 2854.4622      | 1427.7347        | 25 |
| 14 | 1477.7468 | 739.3770        | 1460.7202      | 730.8638         | 1459.7362      | 730.3717         | I    | 2759.3887 | 1380.1980       | 2742.3621      | 1371.6847        | 2741.3781      | 1371.1927        | 24 |
| 15 | 1591.7897 | 796.3985        | 1574.7632      | 787.8852         | 1573.7791      | 787.3932         | N    | 2646.3046 | 1323.6559       | 2629.2780      | 1315.1427        | 2628.2940      | 1314.6506        | 23 |
| 16 | 1720.8323 | 860.9198        | 1703.8057      | 852.4065         | 1702.8217      | 851.9145         | E    | 2532.2617 | 1266.6345       | 2515.2351      | 1258.1212        | 2514.2511      | 1257.6292        | 22 |
| 17 | 1849.8749 | 925.4411        | 1832.8483      | 916.9278         | 1831.8643      | 916.4358         | Q    | 2403.2191 | 1202.1132       | 2386.1925      | 1193.5999        | 2385.2085      | 1193.1079        | 21 |
| 18 | 2035.9542 | 1018.4807       | 2018.9277      | 1009.9675        | 2017.9436      | 1009.4755        | W    | 2274.1765 | 1137.5919       | 2257.1499      | 1129.0786        | 2256.1659      | 1128.5866        | 20 |
| 19 | 2149.0383 | 1075.0228       | 2132.0117      | 1066.5095        | 2131.0277      | 1066.0175        | L    | 2088.0972 | 1044.5522       | 2071.0706      | 1036.0389        | 2070.0866      | 1035.5469        | 19 |
| 20 | 2262.1223 | 1131.5648       | 2245.0958      | 1123.0515        | 2244.1118      | 1122.5595        | L    | 1975.0131 | 988.0102        | 1957.9865      | 979.4969         | 1957.0025      | 979.0049         | 18 |
| 21 | 2363.1700 | 1182.0886       | 2346.1435      | 1173.5754        | 2345.1594      | 1173.0834        | T    | 1861.9290 | 931.4682        | 1844.9025      | 922.9549         | 1843.9185      | 922.4629         | 17 |



|    |           |           |           |           |           |           |   |           |          |           |          |           |          |    |
|----|-----------|-----------|-----------|-----------|-----------|-----------|---|-----------|----------|-----------|----------|-----------|----------|----|
| 22 | 2464.2177 | 1232.6125 | 2447.1911 | 1224.0992 | 2446.2071 | 1223.6072 | T | 1760.8814 | 880.9443 | 1743.8548 | 872.4310 | 1742.8708 | 871.9390 | 16 |
| 23 | 2535.2548 | 1268.1310 | 2518.2283 | 1259.6178 | 2517.2442 | 1259.1258 | A | 1659.8337 | 830.4205 | 1642.8071 | 821.9072 | 1641.8231 | 821.4152 | 15 |
| 24 | 2663.3498 | 1332.1785 | 2646.3232 | 1323.6652 | 2645.3392 | 1323.1732 | K | 1588.7966 | 794.9019 | 1571.7700 | 786.3886 | 1570.7860 | 785.8966 | 14 |
| 25 | 2777.3927 | 1389.2000 | 2760.3661 | 1380.6867 | 2759.3821 | 1380.1947 | N | 1460.7016 | 730.8544 | 1443.6751 | 722.3412 | 1442.6910 | 721.8492 | 13 |
| 26 | 2890.4768 | 1445.7420 | 2873.4502 | 1437.2287 | 2872.4662 | 1436.7367 | L | 1346.6587 | 673.8330 | 1329.6321 | 665.3197 | 1328.6481 | 664.8277 | 12 |
| 27 | 3037.5452 | 1519.2762 | 3020.5186 | 1510.7629 | 3019.5346 | 1510.2709 | F | 1233.5746 | 617.2909 | 1216.5481 | 608.7777 | 1215.5640 | 608.2857 | 11 |
| 28 | 3150.6292 | 1575.8183 | 3133.6027 | 1567.3050 | 3132.6187 | 1566.8130 | L | 1086.5062 | 543.7567 | 1069.4796 | 535.2435 | 1068.4956 | 534.7515 | 10 |
| 29 | 3265.6562 | 1633.3317 | 3248.6296 | 1624.8185 | 3247.6456 | 1624.3264 | N | 973.4221  | 487.2147 | 956.3956  | 478.7014 | 955.4116  | 478.2094 | 9  |
| 30 | 3402.7151 | 1701.8612 | 3385.6885 | 1693.3479 | 3384.7045 | 1692.8559 | H | 858.3952  | 429.7012 | 841.3686  | 421.1880 | 840.3846  | 420.6959 | 8  |
| 31 | 3489.7471 | 1745.3772 | 3472.7206 | 1736.8639 | 3471.7366 | 1736.3719 | S | 721.3363  | 361.1718 | 704.3097  | 352.6585 | 703.3257  | 352.1665 | 7  |
| 32 | 3618.7897 | 1809.8985 | 3601.7632 | 1801.3852 | 3600.7791 | 1800.8932 | E | 634.3042  | 317.6558 | 617.2777  | 309.1425 | 616.2937  | 308.6505 | 6  |
| 33 | 3733.8167 | 1867.4120 | 3716.7901 | 1858.8987 | 3715.8061 | 1858.4067 | N | 505.2617  | 253.1345 | 488.2351  | 244.6212 | 487.2511  | 244.1292 | 5  |
| 34 | 3804.8538 | 1902.9305 | 3787.8272 | 1894.4172 | 3786.8432 | 1893.9252 | A | 390.2347  | 195.6210 | 373.2082  | 187.1077 | 372.2241  | 186.6157 | 4  |
| 35 | 3905.9014 | 1953.4544 | 3888.8749 | 1944.9411 | 3887.8909 | 1944.4491 | T | 319.1976  | 160.1024 | 302.1710  | 151.5892 | 301.1870  | 151.0972 | 3  |
| 36 | 3976.9386 | 1988.9729 | 3959.9120 | 1980.4596 | 3958.9280 | 1979.9676 | A | 218.1499  | 109.5786 | 201.1234  | 101.0653 |           |          | 2  |
| 37 |           |           |           |           |           |           | K | 147.1128  | 74.0600  | 130.0863  | 65.5468  |           |          | 1  |

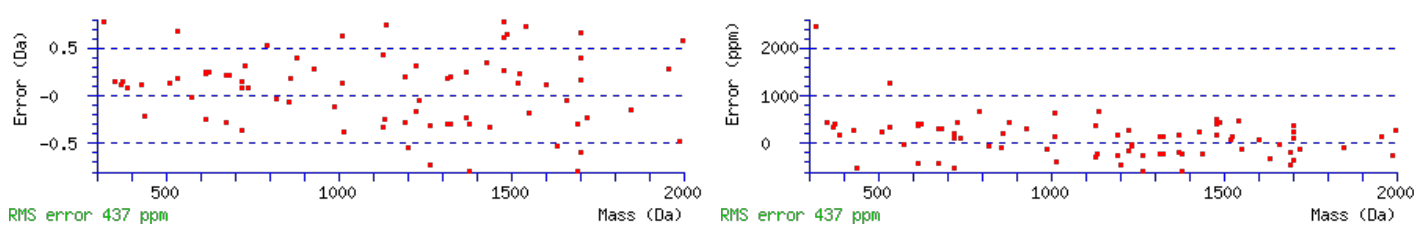

NCBI BLAST search of [MVSHHNLTTGATLINEQWLLTTAKNLFNLHSENATAK](#)  
 (Parameters: blastp, nr protein database, expect=20000, no filter, PAM30)  
 Other BLAST [web gateways](#)

All matches to this query

| Score | Mr(calc)  | Delta  | Sequence                                              | Site Analysis                       |
|-------|-----------|--------|-------------------------------------------------------|-------------------------------------|
| 113.6 | 4122.0367 | 0.0175 | <a href="#">MVSHHNLTTGATLINEQWLLTTAKNLFNLHSENATAK</a> | Deamidated N6, Q17, N29, N33 54.51% |
| 112.2 | 4122.0367 | 0.0175 | <a href="#">MVSHHNLTTGATLINEQWLLTTAKNLFNLHSENATAK</a> | Deamidated N6, Q17, N25, N33 39.13% |
| 100.0 | 4122.0367 | 0.0175 | <a href="#">MVSHHNLTTGATLINEQWLLTTAKNLFNLHSENATAK</a> | Deamidated N6, N15, N29, N33 2.37%  |
| 99.6  | 4122.0367 | 0.0175 | <a href="#">MVSHHNLTTGATLINEQWLLTTAKNLFNLHSENATAK</a> | Deamidated N6, N25, N29, N33 2.16%  |
| 97.4  | 4122.0367 | 0.0175 | <a href="#">MVSHHNLTTGATLINEQWLLTTAKNLFNLHSENATAK</a> | Deamidated N6, N15, N25, N33 1.30%  |
| 86.5  | 4122.0367 | 0.0175 | <a href="#">MVSHHNLTTGATLINEQWLLTTAKNLFNLHSENATAK</a> | Deamidated N6, Q17, N25, N29 0.11%  |
| 85.8  | 4122.0367 | 0.0175 | <a href="#">MVSHHNLTTGATLINEQWLLTTAKNLFNLHSENATAK</a> | Deamidated N15, Q17, N29, N33 0.09% |
| 83.3  | 4121.0527 | 1.0015 | <a href="#">MVSHHNLTTGATLINEQWLLTTAKNLFNLHSENATAK</a> |                                     |
| 83.3  | 4122.0367 | 0.0175 | <a href="#">MVSHHNLTTGATLINEQWLLTTAKNLFNLHSENATAK</a> | Deamidated N15, Q17, N25, N33 0.05% |
| 83.2  | 4122.0367 | 0.0175 | <a href="#">MVSHHNLTTGATLINEQWLLTTAKNLFNLHSENATAK</a> | Deamidated N15, N25, N29, N33 0.05% |

Mascot: <http://www.matrixscience.com/>

# MASCOT SCIENCE Mascot Search Results

## Peptide View

MS/MS Fragmentation of **MVSHHNLTTGATLINEQWLLTTAKNLFNLHSEENATAK**

Found in **J3QR68** in **con\_Xuniprot\_HUMAN3**, J3QR68\_HUMAN Haptoglobin (Fragment) OS=Homo sapiens GN=HP PE=3 SV=1

Match to Query 28928: 4138.043176 from(1035.518070,4+) intensity(0.0000) rtinseconds(2628) scans(6877) index(25666)

Title: 111019\_Est\_MI\_YS\_G\_07Spectrum5930\_scans\_\_6877

Data file C:\mascot\20140703\_Tmgf\_1D\CSV\_UseAnalysis\MasterCSV\All\_Glyco\mgf\ptm\UC18ERLIC\_PTM\_35D.mgf

Click mouse within plot area to zoom in by factor of two about that point

Or, to Da

Label all possible matches Label matches used for scoring

Show Y-axis

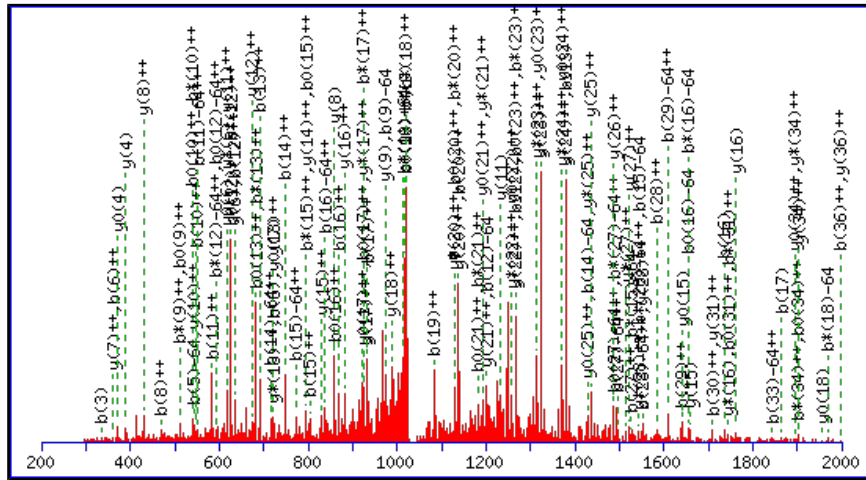

Monoisotopic mass of neutral peptide Mr(calc): 4138.0317

Fixed modifications: Carbamidomethyl (C) (apply to specified residues or termini only)

Variable modifications:

M1 : Oxidation (M), with neutral losses 0.0000 (shown in table), 63.9983

N15 : Deamidated (NQ)

N25 : Deamidated (NQ)

N29 : Deamidated (NQ)

N33 : Deamidated (NQ)

Ions Score: 111 Expect: 1.9e-009

Matches : 129/616 fragment ions using 172 most intense peaks (help)

| #  | b         | b <sup>++</sup> | b <sup>*</sup> | b <sup>*++</sup> | b <sup>0</sup> | b <sup>0++</sup> | Seq. | y         | y <sup>++</sup> | y <sup>*</sup> | y <sup>*++</sup> | y <sup>0</sup> | y <sup>0++</sup> | #  |
|----|-----------|-----------------|----------------|------------------|----------------|------------------|------|-----------|-----------------|----------------|------------------|----------------|------------------|----|
| 1  | 148.0427  | 74.5250         |                |                  |                |                  | M    |           |                 |                |                  |                |                  | 37 |
| 2  | 247.1111  | 124.0592        |                |                  |                |                  | V    | 3992.0036 | 1996.5054       | 3974.9771      | 1987.9922        | 3973.9930      | 1987.5002        | 36 |
| 3  | 334.1431  | 167.5752        |                |                  | 316.1326       | 158.5699         | S    | 3892.9352 | 1946.9712       | 3875.9086      | 1938.4580        | 3874.9246      | 1937.9660        | 35 |
| 4  | 471.2020  | 236.1047        |                |                  | 453.1915       | 227.0994         | H    | 3805.9032 | 1903.4552       | 3788.8766      | 1894.9419        | 3787.8926      | 1894.4499        | 34 |
| 5  | 608.2609  | 304.6341        |                |                  | 590.2504       | 295.6288         | H    | 3668.8443 | 1834.9258       | 3651.8177      | 1826.4125        | 3650.8337      | 1825.9205        | 33 |
| 6  | 722.3039  | 361.6556        | 705.2773       | 353.1423         | 704.2933       | 352.6503         | N    | 3531.7853 | 1766.3963       | 3514.7588      | 1757.8830        | 3513.7748      | 1757.3910        | 32 |
| 7  | 835.3879  | 418.1976        | 818.3614       | 409.6843         | 817.3774       | 409.1923         | L    | 3417.7424 | 1709.3748       | 3400.7159      | 1700.8616        | 3399.7318      | 1700.3696        | 31 |
| 8  | 936.4356  | 468.7214        | 919.4091       | 460.2082         | 918.4250       | 459.7162         | T    | 3304.6583 | 1652.8328       | 3287.6318      | 1644.3195        | 3286.6478      | 1643.8275        | 30 |
| 9  | 1037.4833 | 519.2453        | 1020.4567      | 510.7320         | 1019.4727      | 510.2400         | T    | 3203.6107 | 1602.3090       | 3186.5841      | 1593.7957        | 3185.6001      | 1593.3037        | 29 |
| 10 | 1094.5048 | 547.7560        | 1077.4782      | 539.2427         | 1076.4942      | 538.7507         | G    | 3102.5630 | 1551.7851       | 3085.5364      | 1543.2719        | 3084.5524      | 1542.7799        | 28 |
| 11 | 1165.5419 | 583.2746        | 1148.5153      | 574.7613         | 1147.5313      | 574.2693         | A    | 3045.5415 | 1523.2744       | 3028.5150      | 1514.7611        | 3027.5310      | 1514.2691        | 27 |
| 12 | 1266.5895 | 633.7984        | 1249.5630      | 625.2851         | 1248.5790      | 624.7931         | T    | 2974.5044 | 1487.7558       | 2957.4779      | 1479.2426        | 2956.4938      | 1478.7506        | 26 |
| 13 | 1379.6736 | 690.3404        | 1362.6471      | 681.8272         | 1361.6630      | 681.3352         | L    | 2873.4567 | 1437.2320       | 2856.4302      | 1428.7187        | 2855.4462      | 1428.2267        | 25 |
| 14 | 1492.7577 | 746.8825        | 1475.7311      | 738.3692         | 1474.7471      | 737.8772         | I    | 2760.3727 | 1380.6900       | 2743.3461      | 1372.1767        | 2742.3621      | 1371.6847        | 24 |
| 15 | 1607.7846 | 804.3959        | 1590.7581      | 795.8827         | 1589.7741      | 795.3907         | N    | 2647.2886 | 1324.1479       | 2630.2621      | 1315.6347        | 2629.2780      | 1315.1427        | 23 |
| 16 | 1736.8272 | 868.9172        | 1719.8007      | 860.4040         | 1718.8166      | 859.9120         | E    | 2532.2617 | 1266.6345       | 2515.2351      | 1258.1212        | 2514.2511      | 1257.6292        | 22 |
| 17 | 1864.8858 | 932.9465        | 1847.8592      | 924.4333         | 1846.8752      | 923.9413         | Q    | 2403.2191 | 1202.1132       | 2386.1925      | 1193.5999        | 2385.2085      | 1193.1079        | 21 |
| 18 | 2050.9651 | 1025.9862       | 2033.9386      | 1017.4729        | 2032.9545      | 1016.9809        | W    | 2275.1605 | 1138.0839       | 2258.1339      | 1129.5706        | 2257.1499      | 1129.0786        | 20 |
| 19 | 2164.0492 | 1082.5282       | 2147.0226      | 1074.0149        | 2146.0386      | 1073.5229        | L    | 2089.0812 | 1045.0442       | 2072.0546      | 1036.5310        | 2071.0706      | 1036.0389        | 19 |
| 20 | 2277.1332 | 1139.0703       | 2260.1067      | 1130.5570        | 2259.1227      | 1130.0650        | L    | 1975.9971 | 988.5022        | 1958.9706      | 979.9889         | 1957.9865      | 979.4969         | 18 |
| 21 | 2378.1809 | 1189.5941       | 2361.1544      | 1181.0808        | 2360.1703      | 1180.5888        | T    | 1862.9130 | 931.9602        | 1845.8865      | 923.4469         | 1844.9025      | 922.9549         | 17 |

|    |           |           |           |           |           |           |   |           |          |           |          |           |          |    |
|----|-----------|-----------|-----------|-----------|-----------|-----------|---|-----------|----------|-----------|----------|-----------|----------|----|
| 22 | 2479.2286 | 1240.1179 | 2462.2020 | 1231.6047 | 2461.2180 | 1231.1126 | T | 1761.8654 | 881.4363 | 1744.8388 | 872.9230 | 1743.8548 | 872.4310 | 16 |
| 23 | 2550.2657 | 1275.6365 | 2533.2392 | 1267.1232 | 2532.2551 | 1266.6312 | A | 1660.8177 | 830.9125 | 1643.7911 | 822.3992 | 1642.8071 | 821.9072 | 15 |
| 24 | 2678.3607 | 1339.6840 | 2661.3341 | 1331.1707 | 2660.3501 | 1330.6787 | K | 1589.7806 | 795.3939 | 1572.7540 | 786.8807 | 1571.7700 | 786.3886 | 14 |
| 25 | 2793.3876 | 1397.1974 | 2776.3611 | 1388.6842 | 2775.3770 | 1388.1922 | N | 1461.6856 | 731.3464 | 1444.6591 | 722.8332 | 1443.6750 | 722.3412 | 13 |
| 26 | 2906.4717 | 1453.7395 | 2889.4451 | 1445.2262 | 2888.4611 | 1444.7342 | L | 1346.6587 | 673.8330 | 1329.6321 | 665.3197 | 1328.6481 | 664.8277 | 12 |
| 27 | 3053.5401 | 1527.2737 | 3036.5135 | 1518.7604 | 3035.5295 | 1518.2684 | F | 1233.5746 | 617.2909 | 1216.5481 | 608.7777 | 1215.5640 | 608.2857 | 11 |
| 28 | 3166.6242 | 1583.8157 | 3149.5976 | 1575.3024 | 3148.6136 | 1574.8104 | L | 1086.5062 | 543.7567 | 1069.4796 | 535.2435 | 1068.4956 | 534.7515 | 10 |
| 29 | 3281.6511 | 1641.3292 | 3264.6245 | 1632.8159 | 3263.6405 | 1632.3239 | N | 973.4221  | 487.2147 | 956.3956  | 478.7014 | 955.4116  | 478.2094 | 9  |
| 30 | 3418.7100 | 1709.8586 | 3401.6835 | 1701.3454 | 3400.6994 | 1700.8534 | H | 858.3952  | 429.7012 | 841.3686  | 421.1880 | 840.3846  | 420.6959 | 8  |
| 31 | 3505.7420 | 1753.3747 | 3488.7155 | 1744.8614 | 3487.7315 | 1744.3694 | S | 721.3363  | 361.1718 | 704.3097  | 352.6585 | 703.3257  | 352.1665 | 7  |
| 32 | 3634.7846 | 1817.8960 | 3617.7581 | 1809.3827 | 3616.7741 | 1808.8907 | E | 634.3042  | 317.6558 | 617.2777  | 309.1425 | 616.2937  | 308.6505 | 6  |
| 33 | 3749.8116 | 1875.4094 | 3732.7850 | 1866.8961 | 3731.8010 | 1866.4041 | N | 505.2617  | 253.1345 | 488.2351  | 244.6212 | 487.2511  | 244.1292 | 5  |
| 34 | 3820.8487 | 1910.9280 | 3803.8221 | 1902.4147 | 3802.8381 | 1901.9227 | A | 390.2347  | 195.6210 | 373.2082  | 187.1077 | 372.2241  | 186.6157 | 4  |
| 35 | 3921.8964 | 1961.4518 | 3904.8698 | 1952.9385 | 3903.8858 | 1952.4465 | T | 319.1976  | 160.1024 | 302.1710  | 151.5892 | 301.1870  | 151.0972 | 3  |
| 36 | 3992.9335 | 1996.9704 | 3975.9069 | 1988.4571 | 3974.9229 | 1987.9651 | A | 218.1499  | 109.5786 | 201.1234  | 101.0653 |           |          | 2  |
| 37 |           |           |           |           |           |           | K | 147.1128  | 74.0600  | 130.0863  | 65.5468  |           |          | 1  |

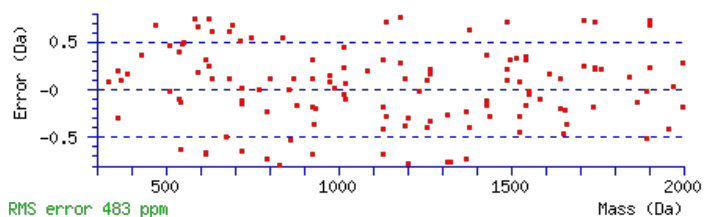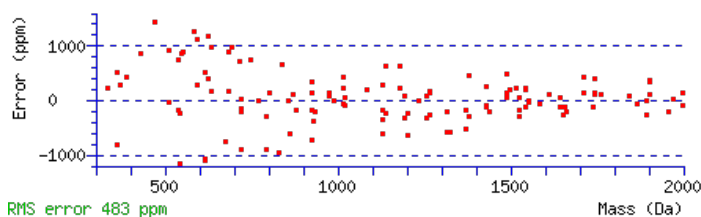

NCBI BLAST search of [MVSHHNLTGATLINEQWLLTTAKNLFNHSENATAK](#)

(Parameters: blastp, nr protein database, expect=20000, no filter, PAM30)

Other BLAST [web gateways](#)

All matches to this query

| Score | Mr(calc)  | Delta  | Sequence                                            | Site Analysis                        |
|-------|-----------|--------|-----------------------------------------------------|--------------------------------------|
| 110.8 | 4138.0317 | 0.0115 | <a href="#">MVSHHNLTGATLINEQWLLTTAKNLFNHSENATAK</a> | Deamidated N15, N25, N29, N33 24.82% |
| 109.9 | 4138.0317 | 0.0115 | <a href="#">MVSHHNLTGATLINEQWLLTTAKNLFNHSENATAK</a> | Deamidated N15, Q17, N29, N33 20.41% |
| 109.4 | 4138.0317 | 0.0115 | <a href="#">MVSHHNLTGATLINEQWLLTTAKNLFNHSENATAK</a> | Deamidated N15, Q17, N25, N33 18.15% |
| 106.7 | 4138.0317 | 0.0115 | <a href="#">MVSHHNLTGATLINEQWLLTTAKNLFNHSENATAK</a> | Deamidated Q17, N25, N29, N33 9.61%  |
| 104.5 | 4138.0317 | 0.0115 | <a href="#">MVSHHNLTGATLINEQWLLTTAKNLFNHSENATAK</a> | Deamidated N6, Q17, N29, N33 5.79%   |
| 104.4 | 4138.0317 | 0.0115 | <a href="#">MVSHHNLTGATLINEQWLLTTAKNLFNHSENATAK</a> | Deamidated N6, N25, N29, N33 5.70%   |
| 101.8 | 4138.0317 | 0.0115 | <a href="#">MVSHHNLTGATLINEQWLLTTAKNLFNHSENATAK</a> | Deamidated N6, N15, N29, N33 3.13%   |
| 101.8 | 4138.0317 | 0.0115 | <a href="#">MVSHHNLTGATLINEQWLLTTAKNLFNHSENATAK</a> | Deamidated N6, Q17, N25, N33 3.11%   |
| 99.8  | 4137.0477 | 0.9955 | <a href="#">MVSHHNLTGATLINEQWLLTTAKNLFNHSENATAK</a> |                                      |
| 98.9  | 4138.0317 | 0.0115 | <a href="#">MVSHHNLTGATLINEQWLLTTAKNLFNHSENATAK</a> | Deamidated N6, N15, N25, N33 1.61%   |

Mascot: <http://www.matrixscience.com/>

# MASCOT SCIENCE Mascot Search Results

## Peptide View

MS/MS Fragmentation of **MVSHHNLTTGATLINEQWLLTTAKNLFNLHSEENATAK**

Found in **J3QR68** in **con\_Xuniprot\_HUMAN3**, J3QR68\_HUMAN Haptoglobin (Fragment) OS=Homo sapiens GN=HP PE=3 SV=1

Match to Query 28556: 4121.084656 from(1031.278440,4+) intensity(0.0000) rtinseconds(2708) scans(7182) index(19936)

Title: 111019\_Est\_MI\_YP\_G\_09Spectrum6371\_scans\_7182

Data file C:\mascot\20140703\_Tmgf\_1D\CSV\_UseAnalysis\MasterCSV\All\_Glyco\mgf\ptm\UC18ERLIC\_PTM\_35D.mgf

Click mouse within plot area to zoom in by factor of two about that point

Or, to Da

Label all possible matches Label matches used for scoring

Show Y-axis

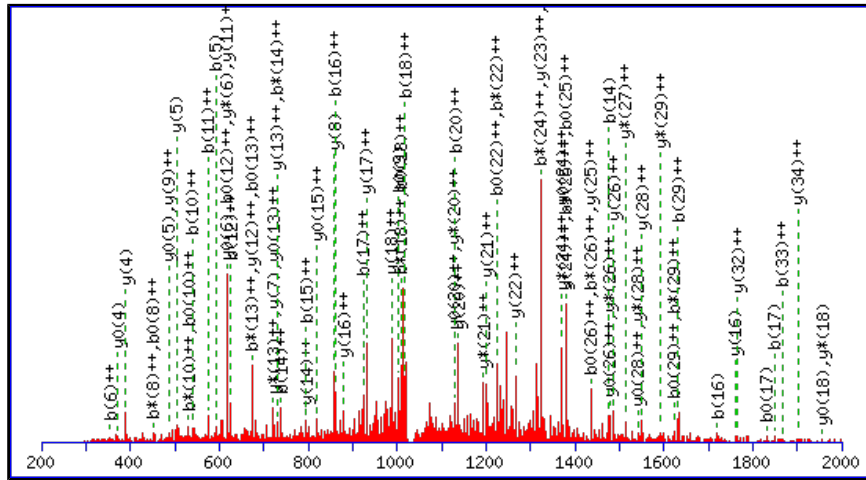

Monoisotopic mass of neutral peptide Mr(calc): 4120.0687

Fixed modifications: Carbamidomethyl (C) (apply to specified residues or termini only)

Variable modifications:

Q17 : Deamidated (NQ)

N33 : Deamidated (NQ)

Ions Score: 111 Expect: 1.4e-009

Matches : 82/414 fragment ions using 87 most intense peaks ([help](#))

| #  | b         | b <sup>++</sup> | b <sup>*</sup> | b <sup>*++</sup> | b <sup>0</sup> | b <sup>0++</sup> | Seq. | y         | y <sup>++</sup> | y <sup>*</sup> | y <sup>*++</sup> | y <sup>0</sup> | y <sup>0++</sup> | #  |
|----|-----------|-----------------|----------------|------------------|----------------|------------------|------|-----------|-----------------|----------------|------------------|----------------|------------------|----|
| 1  | 132.0478  | 66.5275         |                |                  |                |                  | M    |           |                 |                |                  |                |                  | 37 |
| 2  | 231.1162  | 116.0617        |                |                  |                |                  | V    | 3990.0356 | 1995.5214       | 3973.0090      | 1987.0081        | 3972.0250      | 1986.5161        | 36 |
| 3  | 318.1482  | 159.5777        |                |                  | 300.1376       | 150.5725         | S    | 3890.9672 | 1945.9872       | 3873.9406      | 1937.4739        | 3872.9566      | 1936.9819        | 35 |
| 4  | 455.2071  | 228.1072        |                |                  | 437.1966       | 219.1019         | H    | 3803.9351 | 1902.4712       | 3786.9086      | 1893.9579        | 3785.9246      | 1893.4659        | 34 |
| 5  | 592.2660  | 296.6367        |                |                  | 574.2555       | 287.6314         | H    | 3666.8762 | 1833.9417       | 3649.8497      | 1825.4285        | 3648.8657      | 1824.9365        | 33 |
| 6  | 706.3090  | 353.6581        | 689.2824       | 345.1448         | 688.2984       | 344.6528         | N    | 3529.8173 | 1765.4123       | 3512.7908      | 1756.8990        | 3511.8067      | 1756.4070        | 32 |
| 7  | 819.3930  | 410.2001        | 802.3665       | 401.6869         | 801.3825       | 401.1949         | L    | 3415.7744 | 1708.3908       | 3398.7478      | 1699.8776        | 3397.7638      | 1699.3855        | 31 |
| 8  | 920.4407  | 460.7240        | 903.4141       | 452.2107         | 902.4301       | 451.7187         | T    | 3302.6903 | 1651.8488       | 3285.6638      | 1643.3355        | 3284.6798      | 1642.8435        | 30 |
| 9  | 1021.4884 | 511.2478        | 1004.4618      | 502.7346         | 1003.4778      | 502.2425         | T    | 3201.6426 | 1601.3250       | 3184.6161      | 1592.8117        | 3183.6321      | 1592.3197        | 29 |
| 10 | 1078.5098 | 539.7586        | 1061.4833      | 531.2453         | 1060.4993      | 530.7533         | G    | 3100.5950 | 1550.8011       | 3083.5684      | 1542.2878        | 3082.5844      | 1541.7958        | 28 |
| 11 | 1149.5470 | 575.2771        | 1132.5204      | 566.7638         | 1131.5364      | 566.2718         | A    | 3043.5735 | 1522.2904       | 3026.5469      | 1513.7771        | 3025.5629      | 1513.2851        | 27 |
| 12 | 1250.5946 | 625.8010        | 1233.5681      | 617.2877         | 1232.5841      | 616.7957         | T    | 2972.5364 | 1486.7718       | 2955.5098      | 1478.2586        | 2954.5258      | 1477.7665        | 26 |
| 13 | 1363.6787 | 682.3430        | 1346.6521      | 673.8297         | 1345.6681      | 673.3377         | L    | 2871.4887 | 1436.2480       | 2854.4622      | 1427.7347        | 2853.4781      | 1427.2427        | 25 |
| 14 | 1476.7628 | 738.8850        | 1459.7362      | 730.3717         | 1458.7522      | 729.8797         | I    | 2758.4046 | 1379.7060       | 2741.3781      | 1371.1927        | 2740.3941      | 1370.7007        | 24 |
| 15 | 1590.8057 | 795.9065        | 1573.7791      | 787.3932         | 1572.7951      | 786.9012         | N    | 2645.3206 | 1323.1639       | 2628.2940      | 1314.6506        | 2627.3100      | 1314.1586        | 23 |
| 16 | 1719.8483 | 860.4278        | 1702.8217      | 851.9145         | 1701.8377      | 851.4225         | E    | 2531.2776 | 1266.1425       | 2514.2511      | 1257.6292        | 2513.2671      | 1257.1372        | 22 |
| 17 | 1848.8909 | 924.9491        | 1831.8643      | 916.4358         | 1830.8803      | 915.9438         | Q    | 2402.2351 | 1201.6212       | 2385.2085      | 1193.1079        | 2384.2245      | 1192.6159        | 21 |
| 18 | 2034.9702 | 1017.9887       | 2017.9436      | 1009.4755        | 2016.9596      | 1008.9834        | W    | 2273.1925 | 1137.0999       | 2256.1659      | 1128.5866        | 2255.1819      | 1128.0946        | 20 |
| 19 | 2148.0543 | 1074.5308       | 2131.0277      | 1066.0175        | 2130.0437      | 1065.5255        | L    | 2087.1131 | 1044.0602       | 2070.0866      | 1035.5469        | 2069.1026      | 1035.0549        | 19 |
| 20 | 2261.1383 | 1131.0728       | 2244.1118      | 1122.5595        | 2243.1278      | 1122.0675        | L    | 1974.0291 | 987.5182        | 1957.0025      | 979.0049         | 1956.0185      | 978.5129         | 18 |
| 21 | 2362.1860 | 1181.5966       | 2345.1594      | 1173.0834        | 2344.1754      | 1172.5914        | T    | 1860.9450 | 930.9761        | 1843.9185      | 922.4629         | 1842.9345      | 921.9709         | 17 |
| 22 | 2463.2337 | 1232.1205       | 2446.2071      | 1223.6072        | 2445.2231      | 1223.1152        | T    | 1759.8973 | 880.4523        | 1742.8708      | 871.9390         | 1741.8868      | 871.4470         | 16 |

|    |           |           |           |           |           |           |   |           |          |           |          |           |          |    |
|----|-----------|-----------|-----------|-----------|-----------|-----------|---|-----------|----------|-----------|----------|-----------|----------|----|
| 23 | 2534.2708 | 1267.6390 | 2517.2442 | 1259.1258 | 2516.2602 | 1258.6337 | A | 1658.8497 | 829.9285 | 1641.8231 | 821.4152 | 1640.8391 | 820.9232 | 15 |
| 24 | 2662.3658 | 1331.6865 | 2645.3392 | 1323.1732 | 2644.3552 | 1322.6812 | K | 1587.8125 | 794.4099 | 1570.7860 | 785.8966 | 1569.8020 | 785.4046 | 14 |
| 25 | 2776.4087 | 1388.7080 | 2759.3821 | 1380.1947 | 2758.3981 | 1379.7027 | N | 1459.7176 | 730.3624 | 1442.6910 | 721.8492 | 1441.7070 | 721.3571 | 13 |
| 26 | 2889.4927 | 1445.2500 | 2872.4662 | 1436.7367 | 2871.4822 | 1436.2447 | L | 1345.6747 | 673.3410 | 1328.6481 | 664.8277 | 1327.6641 | 664.3357 | 12 |
| 27 | 3036.5612 | 1518.7842 | 3019.5346 | 1510.2709 | 3018.5506 | 1509.7789 | F | 1232.5906 | 616.7989 | 1215.5640 | 608.2857 | 1214.5800 | 607.7937 | 11 |
| 28 | 3149.6452 | 1575.3262 | 3132.6187 | 1566.8130 | 3131.6347 | 1566.3210 | L | 1085.5222 | 543.2647 | 1068.4956 | 534.7515 | 1067.5116 | 534.2594 | 10 |
| 29 | 3263.6881 | 1632.3477 | 3246.6616 | 1623.8344 | 3245.6776 | 1623.3424 | N | 972.4381  | 486.7227 | 955.4116  | 478.2094 | 954.4275  | 477.7174 | 9  |
| 30 | 3400.7471 | 1700.8772 | 3383.7205 | 1692.3639 | 3382.7365 | 1691.8719 | H | 858.3952  | 429.7012 | 841.3686  | 421.1880 | 840.3846  | 420.6959 | 8  |
| 31 | 3487.7791 | 1744.3932 | 3470.7525 | 1735.8799 | 3469.7685 | 1735.3879 | S | 721.3363  | 361.1718 | 704.3097  | 352.6585 | 703.3257  | 352.1665 | 7  |
| 32 | 3616.8217 | 1808.9145 | 3599.7951 | 1800.4012 | 3598.8111 | 1799.9092 | E | 634.3042  | 317.6558 | 617.2777  | 309.1425 | 616.2937  | 308.6505 | 6  |
| 33 | 3731.8486 | 1866.4279 | 3714.8221 | 1857.9147 | 3713.8381 | 1857.4227 | N | 505.2617  | 253.1345 | 488.2351  | 244.6212 | 487.2511  | 244.1292 | 5  |
| 34 | 3802.8857 | 1901.9465 | 3785.8592 | 1893.4332 | 3784.8752 | 1892.9412 | A | 390.2347  | 195.6210 | 373.2082  | 187.1077 | 372.2241  | 186.6157 | 4  |
| 35 | 3903.9334 | 1952.4703 | 3886.9069 | 1943.9571 | 3885.9229 | 1943.4651 | T | 319.1976  | 160.1024 | 302.1710  | 151.5892 | 301.1870  | 151.0972 | 3  |
| 36 | 3974.9705 | 1987.9889 | 3957.9440 | 1979.4756 | 3956.9600 | 1978.9836 | A | 218.1499  | 109.5786 | 201.1234  | 101.0653 |           |          | 2  |
| 37 |           |           |           |           |           |           | K | 147.1128  | 74.0600  | 130.0863  | 65.5468  |           |          | 1  |

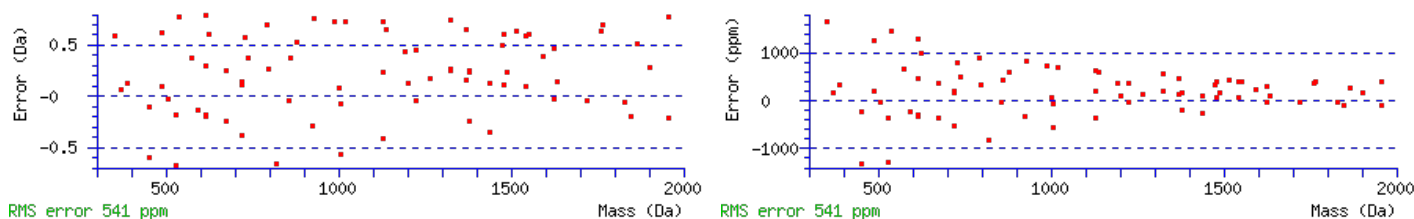

NCBI BLAST search of [MVSHHNLTTGATLINEQWLLTTAKNLFNLHSENATAK](#)

(Parameters: blastp, nr protein database, expect=20000, no filter, PAM30)

Other BLAST [web gateways](#)

All matches to this query

| Score | Mr(calc)  | Delta  | Sequence                                              | Site Analysis              |
|-------|-----------|--------|-------------------------------------------------------|----------------------------|
| 110.8 | 4120.0687 | 1.0159 | <a href="#">MVSHHNLTTGATLINEQWLLTTAKNLFNLHSENATAK</a> | Deamidated Q17, N33 60.07% |
| 104.9 | 4120.0687 | 1.0159 | <a href="#">MVSHHNLTTGATLINEQWLLTTAKNLFNLHSENATAK</a> | Deamidated N29, N33 15.73% |
| 103.2 | 4120.0687 | 1.0159 | <a href="#">MVSHHNLTTGATLINEQWLLTTAKNLFNLHSENATAK</a> | Deamidated N25, N33 10.58% |
| 102.7 | 4120.0687 | 1.0159 | <a href="#">MVSHHNLTTGATLINEQWLLTTAKNLFNLHSENATAK</a> | Deamidated N6, N33 9.28%   |
| 96.8  | 4120.0687 | 1.0159 | <a href="#">MVSHHNLTTGATLINEQWLLTTAKNLFNLHSENATAK</a> | Deamidated N25, N29 2.41%  |
| 91.2  | 4120.0687 | 1.0159 | <a href="#">MVSHHNLTTGATLINEQWLLTTAKNLFNLHSENATAK</a> | Deamidated N15, N33 0.67%  |
| 89.3  | 4120.0687 | 1.0159 | <a href="#">MVSHHNLTTGATLINEQWLLTTAKNLFNLHSENATAK</a> | Deamidated Q17, N29 0.42%  |
| 89.2  | 4120.0687 | 1.0159 | <a href="#">MVSHHNLTTGATLINEQWLLTTAKNLFNLHSENATAK</a> | Deamidated N6, N29 0.42%   |
| 85.1  | 4119.0847 | 1.9999 | <a href="#">MVSHHNLTTGATLINEQWLLTTAKNLFNLHSENATAK</a> |                            |
| 81.6  | 4120.0687 | 1.0159 | <a href="#">MVSHHNLTTGATLINEQWLLTTAKNLFNLHSENATAK</a> | Deamidated Q17, N25 0.07%  |

Mascot: <http://www.matrixscience.com/>



# MASCOT SCIENCE Mascot Search Results

## Peptide View

MS/MS Fragmentation of **MVSHHNLTTGATLINEQWLLTTAK**

Found in **J3QR68** in **con\_Xuniprot\_HUMAN3**, J3QR68\_HUMAN Haptoglobin (Fragment) OS=Homo sapiens GN=HP PE=3 SV=1

Match to Query 24119: 2695.369188 from(1348.691870,2+) intensity(19993.7578) rtinseconds(1783) scans(4535) index(24606)

Title: 111019\_Est\_ML\_YS\_G\_06Spectrum3943\_scans\_\_4535

Data file C:\mascot\20140703\_Tmgf\_1D\CSV\_UseAnalysis\MasterCSV\All\_Glyco\mgf\ptm\UC18ERLIC\_PTM\_35D.mgf

Click mouse within plot area to zoom in by factor of two about that point

Or,  to  Da

Label all possible matches  Label matches used for scoring

Show Y-axis

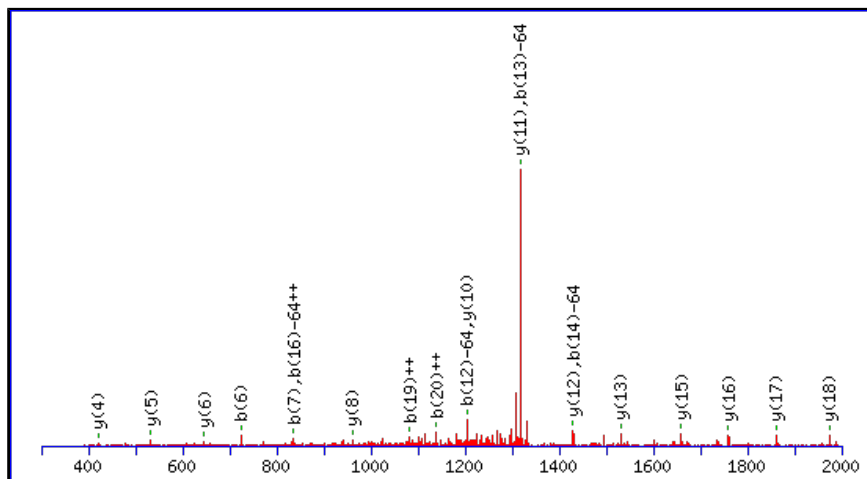

Monoisotopic mass of neutral peptide Mr(calc): 2695.3639

Fixed modifications: Carbamidomethyl (C) (apply to specified residues or termini only)

Variable modifications:

M1 : Oxidation (M), with neutral losses 0.0000 (shown in table), 63.9983

N6 : Deamidated (NQ)

Ions Score: 110 Expect: 2.1e-009

Matches : 20/382 fragment ions using 17 most intense peaks ([help](#))

| #  | b               | b <sup>++</sup>  | b <sup>*</sup> | b <sup>*++</sup> | b <sup>0</sup> | b <sup>0++</sup> | Seq. | y                | y <sup>++</sup> | y <sup>*</sup> | y <sup>*++</sup> | y <sup>0</sup> | y <sup>0++</sup> | #  |
|----|-----------------|------------------|----------------|------------------|----------------|------------------|------|------------------|-----------------|----------------|------------------|----------------|------------------|----|
| 1  | 148.0427        | 74.5250          |                |                  |                |                  | M    |                  |                 |                |                  |                |                  | 24 |
| 2  | 247.1111        | 124.0592         |                |                  |                |                  | V    | 2549.3358        | 1275.1716       | 2532.3093      | 1266.6583        | 2531.3253      | 1266.1663        | 23 |
| 3  | 334.1431        | 167.5752         |                |                  | 316.1326       | 158.5699         | S    | 2450.2674        | 1225.6373       | 2433.2409      | 1217.1241        | 2432.2569      | 1216.6321        | 22 |
| 4  | 471.2020        | 236.1047         |                |                  | 453.1915       | 227.0994         | H    | 2363.2354        | 1182.1213       | 2346.2088      | 1173.6081        | 2345.2248      | 1173.1160        | 21 |
| 5  | 608.2609        | 304.6341         |                |                  | 590.2504       | 295.6288         | H    | 2226.1765        | 1113.5919       | 2209.1499      | 1105.0786        | 2208.1659      | 1104.5866        | 20 |
| 6  | <b>723.2879</b> | 362.1476         | 706.2613       | 353.6343         | 705.2773       | 353.1423         | N    | 2089.1176        | 1045.0624       | 2072.0910      | 1036.5491        | 2071.1070      | 1036.0571        | 19 |
| 7  | <b>836.3719</b> | 418.6896         | 819.3454       | 410.1763         | 818.3614       | 409.6843         | L    | <b>1974.0906</b> | 987.5489        | 1957.0641      | 979.0357         | 1956.0801      | 978.5437         | 18 |
| 8  | 937.4196        | 469.2135         | 920.3931       | 460.7002         | 919.4091       | 460.2082         | T    | <b>1861.0066</b> | 931.0069        | 1843.9800      | 922.4936         | 1842.9960      | 922.0016         | 17 |
| 9  | 1038.4673       | 519.7373         | 1021.4408      | 511.2240         | 1020.4567      | 510.7320         | T    | <b>1759.9589</b> | 880.4831        | 1742.9323      | 871.9698         | 1741.9483      | 871.4778         | 16 |
| 10 | 1095.4888       | 548.2480         | 1078.4622      | 539.7347         | 1077.4782      | 539.2427         | G    | <b>1658.9112</b> | 829.9592        | 1641.8847      | 821.4460         | 1640.9006      | 820.9540         | 15 |
| 11 | 1166.5259       | 583.7666         | 1149.4993      | 575.2533         | 1148.5153      | 574.7613         | A    | 1601.8897        | 801.4485        | 1584.8632      | 792.9352         | 1583.8792      | 792.4432         | 14 |
| 12 | 1267.5736       | 634.2904         | 1250.5470      | 625.7771         | 1249.5630      | 625.2851         | T    | <b>1530.8526</b> | 765.9299        | 1513.8261      | 757.4167         | 1512.8421      | 756.9247         | 13 |
| 13 | 1380.6576       | 690.8325         | 1363.6311      | 682.3192         | 1362.6471      | 681.8272         | L    | <b>1429.8049</b> | 715.4061        | 1412.7784      | 706.8928         | 1411.7944      | 706.4008         | 12 |
| 14 | 1493.7417       | 747.3745         | 1476.7151      | 738.8612         | 1475.7311      | 738.3692         | I    | <b>1316.7209</b> | 658.8641        | 1299.6943      | 650.3508         | 1298.7103      | 649.8588         | 11 |
| 15 | 1607.7846       | 804.3959         | 1590.7581      | 795.8827         | 1589.7741      | 795.3907         | N    | <b>1203.6368</b> | 602.3220        | 1186.6103      | 593.8088         | 1185.6263      | 593.3168         | 10 |
| 16 | 1736.8272       | 868.9172         | 1719.8007      | 860.4040         | 1718.8166      | 859.9120         | E    | 1089.5939        | 545.3006        | 1072.5673      | 536.7873         | 1071.5833      | 536.2953         | 9  |
| 17 | 1864.8858       | 932.9465         | 1847.8592      | 924.4333         | 1846.8752      | 923.9413         | Q    | <b>960.5513</b>  | 480.7793        | 943.5247       | 472.2660         | 942.5407       | 471.7740         | 8  |
| 18 | 2050.9651       | 1025.9862        | 2033.9386      | 1017.4729        | 2032.9545      | 1016.9809        | W    | 832.4927         | 416.7500        | 815.4662       | 408.2367         | 814.4822       | 407.7447         | 7  |
| 19 | 2164.0492       | <b>1082.5282</b> | 2147.0226      | 1074.0149        | 2146.0386      | 1073.5229        | L    | <b>646.4134</b>  | 323.7103        | 629.3869       | 315.1971         | 628.4028       | 314.7051         | 6  |
| 20 | 2277.1332       | <b>1139.0703</b> | 2260.1067      | 1130.5570        | 2259.1227      | 1130.0650        | L    | <b>533.3293</b>  | 267.1683        | 516.3028       | 258.6550         | 515.3188       | 258.1630         | 5  |
| 21 | 2378.1809       | 1189.5941        | 2361.1544      | 1181.0808        | 2360.1703      | 1180.5888        | T    | <b>420.2453</b>  | 210.6263        | 403.2187       | 202.1130         | 402.2347       | 201.6210         | 4  |
| 22 | 2479.2286       | 1240.1179        | 2462.2020      | 1231.6047        | 2461.2180      | 1231.1126        | T    | 319.1976         | 160.1024        | 302.1710       | 151.5892         | 301.1870       | 151.0972         | 3  |

|    |           |           |           |           |           |           |   |          |          |          |          |  |  |   |
|----|-----------|-----------|-----------|-----------|-----------|-----------|---|----------|----------|----------|----------|--|--|---|
| 23 | 2550.2657 | 1275.6365 | 2533.2392 | 1267.1232 | 2532.2551 | 1266.6312 | A | 218.1499 | 109.5786 | 201.1234 | 101.0653 |  |  | 2 |
| 24 |           |           |           |           |           |           | K | 147.1128 | 74.0600  | 130.0863 | 65.5468  |  |  | 1 |

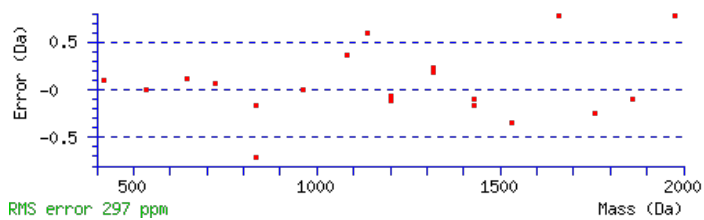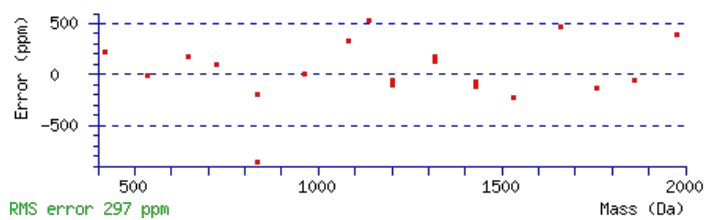

NCBI BLAST search of [MVSHHNLTTGATLINEQWLLTTAK](#)  
 (Parameters: blastp, nr protein database, expect=20000, no filter, PAM30)  
 Other BLAST [web gateways](#)

All matches to this query

| Score | Mr(calc)  | Delta   | Sequence                                 | Site Analysis        |
|-------|-----------|---------|------------------------------------------|----------------------|
| 110.5 | 2695.3639 | 0.0053  | <a href="#">MVSHHNLTTGATLINEQWLLTTAK</a> | Deamidated N6 99.36% |
| 88.5  | 2695.3639 | 0.0053  | <a href="#">MVSHHNLTTGATLINEQWLLTTAK</a> | Deamidated N15 0.64% |
| 65.4  | 2695.3639 | 0.0053  | <a href="#">MVSHHNLTTGATLINEQWLLTTAK</a> | Deamidated Q17 0.00% |
| 6.7   | 2694.3608 | 1.0084  | <a href="#">GTVLWTENALEVLQMTRSLMKEK</a>  |                      |
| 6.7   | 2694.3608 | 1.0084  | <a href="#">GTVLWTENALEVLQMTRSLMKEK</a>  |                      |
| 5.8   | 2695.3680 | 0.0012  | <a href="#">YGSLIFHTIGQLLPQMQAFHSPK</a>  |                      |
| 5.6   | 2694.3766 | 0.9926  | <a href="#">SDDVNLAIYPDLEFQPRPGVAHR</a>  |                      |
| 4.8   | 2694.3646 | 1.0045  | <a href="#">EVQYSNDIMQRGASVGATLLLREK</a> |                      |
| 4.8   | 2694.3646 | 1.0045  | <a href="#">EVQYSNDIMQRGASVGATLLLREK</a> |                      |
| 2.7   | 2695.3700 | -0.0008 | <a href="#">YSMIKVIDAQTLLEAEGDIMEDK</a>  |                      |

Mascot: <http://www.matrixscience.com/>



# MASCOT SCIENCE Mascot Search Results

## Peptide View

MS/MS Fragmentation of **MVSHHNLTTGATLINEQWLLTTAKNLFNLHSEENATAK**

Found in **J3QR68** in **con\_Xuniprot\_HUMAN3**, J3QR68\_HUMAN Haptoglobin (Fragment) OS=Homo sapiens GN=HP PE=3 SV=1

Match to Query 28554: 4121.083816 from(1031.278230,4+) intensity(59996.1875) rtinseconds(2503) scans(6460) index(23523)

Title: 111019\_Est\_MI\_YS\_G\_04Spectrum5600\_scans\_6460

Data file C:\mascot\20140703\_Tmgf\_1D\CSV\_UseAnalysis\MasterCSV\All\_Glyco\mgf\ptm\UC18ERLIC\_PTM\_35D.mgf

Click mouse within plot area to zoom in by factor of two about that point

Or, to Da

Label all possible matches Label matches used for scoring

Show Y-axis

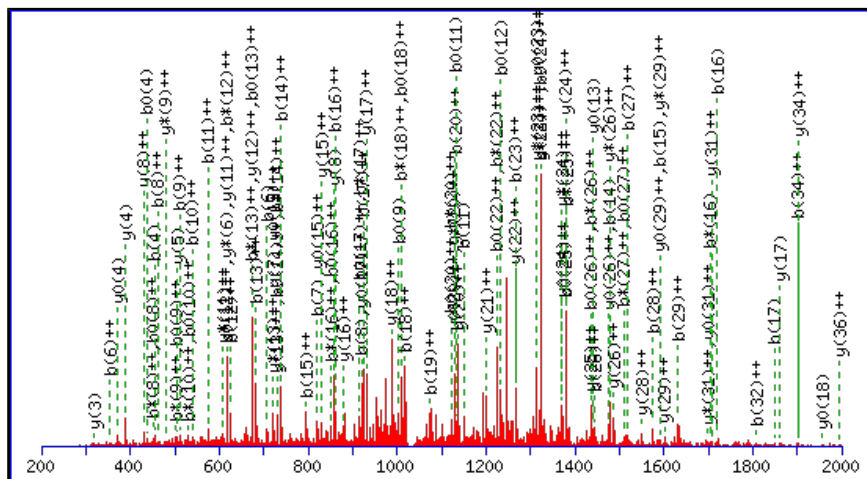

Monoisotopic mass of neutral peptide Mr(calc): 4120.0687

Fixed modifications: Carbamidomethyl (C) (apply to specified residues or termini only)

Variable modifications:

N6 : Deamidated (NQ)

N33 : Deamidated (NQ)

Ions Score: 110 Expect: 1.7e-009

Matches : 113/414 fragment ions using 173 most intense peaks ([help](#))

| #  | b         | b <sup>++</sup> | b <sup>*</sup> | b <sup>*++</sup> | b <sup>0</sup> | b <sup>0++</sup> | Seq. | y         | y <sup>++</sup> | y <sup>*</sup> | y <sup>*++</sup> | y <sup>0</sup> | y <sup>0++</sup> | #  |
|----|-----------|-----------------|----------------|------------------|----------------|------------------|------|-----------|-----------------|----------------|------------------|----------------|------------------|----|
| 1  | 132.0478  | 66.5275         |                |                  |                |                  | M    |           |                 |                |                  |                |                  | 37 |
| 2  | 231.1162  | 116.0617        |                |                  |                |                  | V    | 3990.0356 | 1995.5214       | 3973.0090      | 1987.0081        | 3972.0250      | 1986.5161        | 36 |
| 3  | 318.1482  | 159.5777        |                |                  | 300.1376       | 150.5725         | S    | 3890.9672 | 1945.9872       | 3873.9406      | 1937.4739        | 3872.9566      | 1936.9819        | 35 |
| 4  | 455.2071  | 228.1072        |                |                  | 437.1966       | 219.1019         | H    | 3803.9351 | 1902.4712       | 3786.9086      | 1893.9579        | 3785.9246      | 1893.4659        | 34 |
| 5  | 592.2660  | 296.6367        |                |                  | 574.2555       | 287.6314         | H    | 3666.8762 | 1833.9417       | 3649.8497      | 1825.4285        | 3648.8657      | 1824.9365        | 33 |
| 6  | 707.2930  | 354.1501        | 690.2664       | 345.6368         | 689.2824       | 345.1448         | N    | 3529.8173 | 1765.4123       | 3512.7908      | 1756.8990        | 3511.8067      | 1756.4070        | 32 |
| 7  | 820.3770  | 410.6922        | 803.3505       | 402.1789         | 802.3665       | 401.6869         | L    | 3414.7904 | 1707.8988       | 3397.7638      | 1699.3855        | 3396.7798      | 1698.8935        | 31 |
| 8  | 921.4247  | 461.2160        | 904.3982       | 452.7027         | 903.4141       | 452.2107         | T    | 3301.7063 | 1651.3568       | 3284.6798      | 1642.8435        | 3283.6957      | 1642.3515        | 30 |
| 9  | 1022.4724 | 511.7398        | 1005.4458      | 503.2266         | 1004.4618      | 502.7346         | T    | 3200.6586 | 1600.8329       | 3183.6321      | 1592.3197        | 3182.6481      | 1591.8277        | 29 |
| 10 | 1079.4939 | 540.2506        | 1062.4673      | 531.7373         | 1061.4833      | 531.2453         | G    | 3099.6109 | 1550.3091       | 3082.5844      | 1541.7958        | 3081.6004      | 1541.3038        | 28 |
| 11 | 1150.5310 | 575.7691        | 1133.5044      | 567.2558         | 1132.5204      | 566.7638         | A    | 3042.5895 | 1521.7984       | 3025.5629      | 1513.2851        | 3024.5789      | 1512.7931        | 27 |
| 12 | 1251.5786 | 626.2930        | 1234.5521      | 617.7797         | 1233.5681      | 617.2877         | T    | 2971.5524 | 1486.2798       | 2954.5258      | 1477.7665        | 2953.5418      | 1477.2745        | 26 |
| 13 | 1364.6627 | 682.8350        | 1347.6362      | 674.3217         | 1346.6521      | 673.8297         | L    | 2870.5047 | 1435.7560       | 2853.4781      | 1427.2427        | 2852.4941      | 1426.7507        | 25 |
| 14 | 1477.7468 | 739.3770        | 1460.7202      | 730.8638         | 1459.7362      | 730.3717         | I    | 2757.4206 | 1379.2139       | 2740.3941      | 1370.7007        | 2739.4101      | 1370.2087        | 24 |
| 15 | 1591.7897 | 796.3985        | 1574.7632      | 787.8852         | 1573.7791      | 787.3932         | N    | 2644.3366 | 1322.6719       | 2627.3100      | 1314.1586        | 2626.3260      | 1313.6666        | 23 |
| 16 | 1720.8323 | 860.9198        | 1703.8057      | 852.4065         | 1702.8217      | 851.9145         | E    | 2530.2936 | 1265.6505       | 2513.2671      | 1257.1372        | 2512.2831      | 1256.6452        | 22 |
| 17 | 1848.8909 | 924.9491        | 1831.8643      | 916.4358         | 1830.8803      | 915.9438         | Q    | 2401.2510 | 1201.1292       | 2384.2245      | 1192.6159        | 2383.2405      | 1192.1239        | 21 |
| 18 | 2034.9702 | 1017.9887       | 2017.9436      | 1009.4755        | 2016.9596      | 1008.9834        | W    | 2273.1925 | 1137.0999       | 2256.1659      | 1128.5866        | 2255.1819      | 1128.0946        | 20 |
| 19 | 2148.0543 | 1074.5308       | 2131.0277      | 1066.0175        | 2130.0437      | 1065.5255        | L    | 2087.1131 | 1044.0602       | 2070.0866      | 1035.5469        | 2069.1026      | 1035.0549        | 19 |
| 20 | 2261.1383 | 1131.0728       | 2244.1118      | 1122.5595        | 2243.1278      | 1122.0675        | L    | 1974.0291 | 987.5182        | 1957.0025      | 979.0049         | 1956.0185      | 978.5129         | 18 |
| 21 | 2362.1860 | 1181.5966       | 2345.1594      | 1173.0834        | 2344.1754      | 1172.5914        | T    | 1860.9450 | 930.9761        | 1843.9185      | 922.4629         | 1842.9345      | 921.9709         | 17 |
| 22 | 2463.2337 | 1232.1205       | 2446.2071      | 1223.6072        | 2445.2231      | 1223.1152        | T    | 1759.8973 | 880.4523        | 1742.8708      | 871.9390         | 1741.8868      | 871.4470         | 16 |

|    |           |                  |           |                  |           |                  |   |                 |                 |                 |                 |                  |                 |    |
|----|-----------|------------------|-----------|------------------|-----------|------------------|---|-----------------|-----------------|-----------------|-----------------|------------------|-----------------|----|
| 23 | 2534.2708 | <b>1267.6390</b> | 2517.2442 | 1259.1258        | 2516.2602 | 1258.6337        | A | 1658.8497       | <b>829.9285</b> | 1641.8231       | 821.4152        | 1640.8391        | <b>820.9232</b> | 15 |
| 24 | 2662.3658 | 1331.6865        | 2645.3392 | <b>1323.1732</b> | 2644.3552 | <b>1322.6812</b> | K | 1587.8125       | 794.4099        | 1570.7860       | 785.8966        | 1569.8020        | 785.4046        | 14 |
| 25 | 2776.4087 | 1388.7080        | 2759.3821 | <b>1380.1947</b> | 2758.3981 | <b>1379.7027</b> | N | 1459.7176       | <b>730.3624</b> | 1442.6910       | <b>721.8492</b> | <b>1441.7070</b> | <b>721.3571</b> | 13 |
| 26 | 2889.4927 | <b>1445.2500</b> | 2872.4662 | <b>1436.7367</b> | 2871.4822 | <b>1436.2447</b> | L | 1345.6747       | <b>673.3410</b> | 1328.6481       | 664.8277        | 1327.6641        | 664.3357        | 12 |
| 27 | 3036.5612 | <b>1518.7842</b> | 3019.5346 | <b>1510.2709</b> | 3018.5506 | <b>1509.7789</b> | F | 1232.5906       | <b>616.7989</b> | 1215.5640       | <b>608.2857</b> | 1214.5800        | 607.7937        | 11 |
| 28 | 3149.6452 | <b>1575.3262</b> | 3132.6187 | 1566.8130        | 3131.6347 | 1566.3210        | L | 1085.5222       | 543.2647        | 1068.4956       | 534.7515        | 1067.5116        | 534.2594        | 10 |
| 29 | 3263.6881 | <b>1632.3477</b> | 3246.6616 | 1623.8344        | 3245.6776 | 1623.3424        | N | 972.4381        | 486.7227        | 955.4116        | <b>478.2094</b> | 954.4275         | 477.7174        | 9  |
| 30 | 3400.7471 | 1700.8772        | 3383.7205 | 1692.3639        | 3382.7365 | 1691.8719        | H | <b>858.3952</b> | <b>429.7012</b> | 841.3686        | 421.1880        | 840.3846         | 420.6959        | 8  |
| 31 | 3487.7791 | 1744.3932        | 3470.7525 | 1735.8799        | 3469.7685 | 1735.3879        | S | <b>721.3363</b> | 361.1718        | 704.3097        | 352.6585        | 703.3257         | 352.1665        | 7  |
| 32 | 3616.8217 | <b>1808.9145</b> | 3599.7951 | 1800.4012        | 3598.8111 | 1799.9092        | E | 634.3042        | 317.6558        | <b>617.2777</b> | 309.1425        | 616.2937         | 308.6505        | 6  |
| 33 | 3731.8486 | 1866.4279        | 3714.8221 | 1857.9147        | 3713.8381 | 1857.4227        | N | <b>505.2617</b> | 253.1345        | 488.2351        | 244.6212        | 487.2511         | 244.1292        | 5  |
| 34 | 3802.8857 | <b>1901.9465</b> | 3785.8592 | 1893.4332        | 3784.8752 | 1892.9412        | A | <b>390.2347</b> | 195.6210        | 373.2082        | 187.1077        | <b>372.2241</b>  | 186.6157        | 4  |
| 35 | 3903.9334 | 1952.4703        | 3886.9069 | 1943.9571        | 3885.9229 | 1943.4651        | T | <b>319.1976</b> | 160.1024        | 302.1710        | 151.5892        | 301.1870         | 151.0972        | 3  |
| 36 | 3974.9705 | 1987.9889        | 3957.9440 | 1979.4756        | 3956.9600 | 1978.9836        | A | 218.1499        | 109.5786        | 201.1234        | 101.0653        |                  |                 | 2  |
| 37 |           |                  |           |                  |           |                  | K | 147.1128        | 74.0600         | 130.0863        | 65.5468         |                  |                 | 1  |

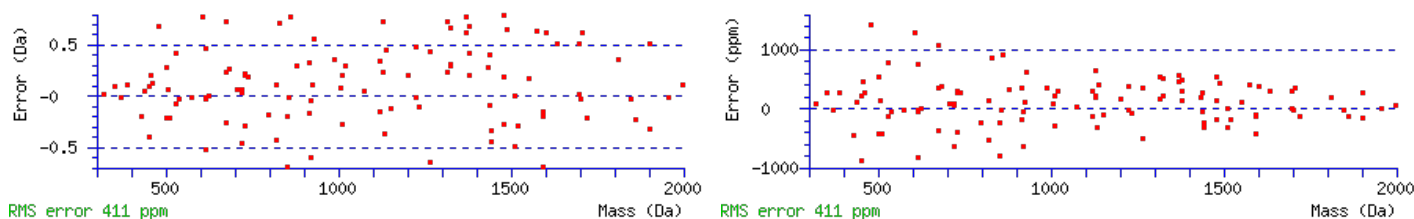

NCBI BLAST search of [MVSHHNLTGATLINEQWLLTTAKNLFNHSENATAK](#)

(Parameters: blastp, nr protein database, expect=20000, no filter, PAM30)

Other BLAST [web gateways](#)

All matches to this query

| Score | Mr(calc)  | Delta  | Sequence                                            | Site Analysis              |
|-------|-----------|--------|-----------------------------------------------------|----------------------------|
| 110.2 | 4120.0687 | 1.0151 | <a href="#">MVSHHNLTGATLINEQWLLTTAKNLFNHSENATAK</a> | Deamidated N6, N33 54.43%  |
| 108.4 | 4120.0687 | 1.0151 | <a href="#">MVSHHNLTGATLINEQWLLTTAKNLFNHSENATAK</a> | Deamidated N15, N33 36.05% |
| 98.1  | 4120.0687 | 1.0151 | <a href="#">MVSHHNLTGATLINEQWLLTTAKNLFNHSENATAK</a> | Deamidated N6, N29 3.42%   |
| 95.2  | 4120.0687 | 1.0151 | <a href="#">MVSHHNLTGATLINEQWLLTTAKNLFNHSENATAK</a> | Deamidated N25, N33 1.75%  |
| 95.1  | 4120.0687 | 1.0151 | <a href="#">MVSHHNLTGATLINEQWLLTTAKNLFNHSENATAK</a> | Deamidated N25, N29 1.72%  |
| 91.6  | 4120.0687 | 1.0151 | <a href="#">MVSHHNLTGATLINEQWLLTTAKNLFNHSENATAK</a> | Deamidated Q17, N33 0.75%  |
| 90.8  | 4120.0687 | 1.0151 | <a href="#">MVSHHNLTGATLINEQWLLTTAKNLFNHSENATAK</a> | Deamidated N29, N33 0.63%  |
| 89.0  | 4120.0687 | 1.0151 | <a href="#">MVSHHNLTGATLINEQWLLTTAKNLFNHSENATAK</a> | Deamidated N15, N29 0.42%  |
| 86.9  | 4120.0687 | 1.0151 | <a href="#">MVSHHNLTGATLINEQWLLTTAKNLFNHSENATAK</a> | Deamidated Q17, N29 0.26%  |
| 83.4  | 4120.0687 | 1.0151 | <a href="#">MVSHHNLTGATLINEQWLLTTAKNLFNHSENATAK</a> | Deamidated N6, N25 0.12%   |

Mascot: <http://www.matrixscience.com/>

# MATRIX SCIENCE Mascot Search Results

## Peptide View

MS/MS Fragmentation of **MVSHHNLTTGATLINEQWLLTTAKNLFNLHSEENATAK**

Found in **J3QR68** in **con\_Xuniprot\_HUMAN3**, J3QR68\_HUMAN Haptoglobin (Fragment) OS=Homo sapiens GN=HP PE=3 SV=1

Match to Query 28706: 4137.057896 from(1035.271750,4+) intensity(5739.0840) rtinseconds(2564) scans(6586) index(5679)

Title: 111019\_Est\_ISCardio\_NMI\_YP\_G\_8Spectrum5816\_scans\_6586

Data file C:\mascot\20140703\_Tmgf\_1D\CSV\_UseAnalysis\MasterCSV\All\_Glyco\mgf\ptm\UC18ERLIC\_PTM\_35D.mgf

Click mouse within plot area to zoom in by factor of two about that point

Or, to Da

Label all possible matches Label matches used for scoring

Show Y-axis

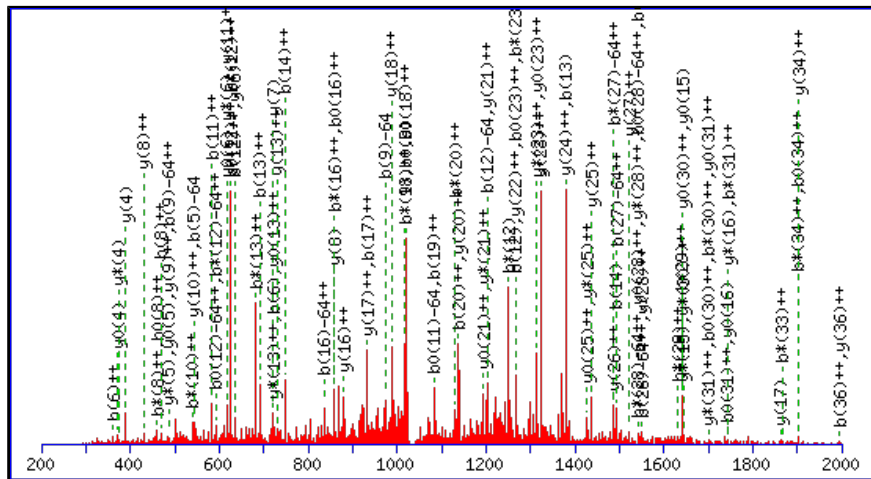

Monoisotopic mass of neutral peptide Mr(calc): 4137.0477

Fixed modifications: Carbamidomethyl (C) (apply to specified residues or termini only)

Variable modifications:

M1 : Oxidation (M), with neutral losses 0.0000 (shown in table), 63.9983

N25 : Deamidated (NQ)

N29 : Deamidated (NQ)

N33 : Deamidated (NQ)

Ions Score: 110 Expect: 2.2e-009

Matches : 101/616 fragment ions using 105 most intense peaks (help)

| #  | b         | b <sup>++</sup> | b <sup>*</sup> | b <sup>*++</sup> | b <sup>0</sup> | b <sup>0++</sup> | Seq. | y         | y <sup>++</sup> | y <sup>*</sup> | y <sup>*++</sup> | y <sup>0</sup> | y <sup>0++</sup> | #  |
|----|-----------|-----------------|----------------|------------------|----------------|------------------|------|-----------|-----------------|----------------|------------------|----------------|------------------|----|
| 1  | 148.0427  | 74.5250         |                |                  |                |                  | M    |           |                 |                |                  |                |                  | 37 |
| 2  | 247.1111  | 124.0592        |                |                  |                |                  | V    | 3991.0196 | 1996.0134       | 3973.9930      | 1987.5002        | 3973.0090      | 1987.0081        | 36 |
| 3  | 334.1431  | 167.5752        |                |                  | 316.1326       | 158.5699         | S    | 3891.9512 | 1946.4792       | 3874.9246      | 1937.9660        | 3873.9406      | 1937.4739        | 35 |
| 4  | 471.2020  | 236.1047        |                |                  | 453.1915       | 227.0994         | H    | 3804.9191 | 1902.9632       | 3787.8926      | 1894.4499        | 3786.9086      | 1893.9579        | 34 |
| 5  | 608.2609  | 304.6341        |                |                  | 590.2504       | 295.6288         | H    | 3667.8602 | 1834.4338       | 3650.8337      | 1825.9205        | 3649.8497      | 1825.4285        | 33 |
| 6  | 722.3039  | 361.6556        | 705.2773       | 353.1423         | 704.2933       | 352.6503         | N    | 3530.8013 | 1765.9043       | 3513.7748      | 1757.3910        | 3512.7908      | 1756.8990        | 32 |
| 7  | 835.3879  | 418.1976        | 818.3614       | 409.6843         | 817.3774       | 409.1923         | L    | 3416.7584 | 1708.8828       | 3399.7318      | 1700.3696        | 3398.7478      | 1699.8776        | 31 |
| 8  | 936.4356  | 468.7214        | 919.4091       | 460.2082         | 918.4250       | 459.7162         | T    | 3303.6743 | 1652.3408       | 3286.6478      | 1643.8275        | 3285.6638      | 1643.3355        | 30 |
| 9  | 1037.4833 | 519.2453        | 1020.4567      | 510.7320         | 1019.4727      | 510.2400         | T    | 3202.6267 | 1601.8170       | 3185.6001      | 1593.3037        | 3184.6161      | 1592.8117        | 29 |
| 10 | 1094.5048 | 547.7560        | 1077.4782      | 539.2427         | 1076.4942      | 538.7507         | G    | 3101.5790 | 1551.2931       | 3084.5524      | 1542.7799        | 3083.5684      | 1542.2878        | 28 |
| 11 | 1165.5419 | 583.2746        | 1148.5153      | 574.7613         | 1147.5313      | 574.2693         | A    | 3044.5575 | 1522.7824       | 3027.5310      | 1514.2691        | 3026.5469      | 1513.7771        | 27 |
| 12 | 1266.5895 | 633.7984        | 1249.5630      | 625.2851         | 1248.5790      | 624.7931         | T    | 2973.5204 | 1487.2638       | 2956.4938      | 1478.7506        | 2955.5098      | 1478.2586        | 26 |
| 13 | 1379.6736 | 690.3404        | 1362.6471      | 681.8272         | 1361.6630      | 681.3352         | L    | 2872.4727 | 1436.7400       | 2855.4462      | 1428.2267        | 2854.4622      | 1427.7347        | 25 |
| 14 | 1492.7577 | 746.8825        | 1475.7311      | 738.3692         | 1474.7471      | 737.8772         | I    | 2759.3887 | 1380.1980       | 2742.3621      | 1371.6847        | 2741.3781      | 1371.1927        | 24 |
| 15 | 1606.8006 | 803.9039        | 1589.7741      | 795.3907         | 1588.7900      | 794.8987         | N    | 2646.3046 | 1323.6559       | 2629.2780      | 1315.1427        | 2628.2940      | 1314.6506        | 23 |
| 16 | 1735.8432 | 868.4252        | 1718.8166      | 859.9120         | 1717.8326      | 859.4200         | E    | 2532.2617 | 1266.6345       | 2515.2351      | 1258.1212        | 2514.2511      | 1257.6292        | 22 |
| 17 | 1863.9018 | 932.4545        | 1846.8752      | 923.9413         | 1845.8912      | 923.4492         | Q    | 2403.2191 | 1202.1132       | 2386.1925      | 1193.5999        | 2385.2085      | 1193.1079        | 21 |
| 18 | 2049.9811 | 1025.4942       | 2032.9545      | 1016.9809        | 2031.9705      | 1016.4889        | W    | 2275.1605 | 1138.0839       | 2258.1339      | 1129.5706        | 2257.1499      | 1129.0786        | 20 |
| 19 | 2163.0652 | 1082.0362       | 2146.0386      | 1073.5229        | 2145.0546      | 1073.0309        | L    | 2089.0812 | 1045.0442       | 2072.0546      | 1036.5310        | 2071.0706      | 1036.0389        | 19 |
| 20 | 2276.1492 | 1138.5782       | 2259.1227      | 1130.0650        | 2258.1386      | 1129.5730        | L    | 1975.9971 | 988.5022        | 1958.9706      | 979.9889         | 1957.9865      | 979.4969         | 18 |
| 21 | 2377.1969 | 1189.1021       | 2360.1703      | 1180.5888        | 2359.1863      | 1180.0968        | T    | 1862.9130 | 931.9602        | 1845.8865      | 923.4469         | 1844.9025      | 922.9549         | 17 |

|    |           |           |           |           |           |           |   |           |          |           |          |           |          |    |
|----|-----------|-----------|-----------|-----------|-----------|-----------|---|-----------|----------|-----------|----------|-----------|----------|----|
| 22 | 2478.2446 | 1239.6259 | 2461.2180 | 1231.1126 | 2460.2340 | 1230.6206 | T | 1761.8654 | 881.4363 | 1744.8388 | 872.9230 | 1743.8548 | 872.4310 | 16 |
| 23 | 2549.2817 | 1275.1445 | 2532.2551 | 1266.6312 | 2531.2711 | 1266.1392 | A | 1660.8177 | 830.9125 | 1643.7911 | 822.3992 | 1642.8071 | 821.9072 | 15 |
| 24 | 2677.3766 | 1339.1920 | 2660.3501 | 1330.6787 | 2659.3661 | 1330.1867 | K | 1589.7806 | 795.3939 | 1572.7540 | 786.8807 | 1571.7700 | 786.3886 | 14 |
| 25 | 2792.4036 | 1396.7054 | 2775.3770 | 1388.1922 | 2774.3930 | 1387.7002 | N | 1461.6856 | 731.3464 | 1444.6591 | 722.8332 | 1443.6750 | 722.3412 | 13 |
| 26 | 2905.4877 | 1453.2475 | 2888.4611 | 1444.7342 | 2887.4771 | 1444.2422 | L | 1346.6587 | 673.8330 | 1329.6321 | 665.3197 | 1328.6481 | 664.8277 | 12 |
| 27 | 3052.5561 | 1526.7817 | 3035.5295 | 1518.2684 | 3034.5455 | 1517.7764 | F | 1233.5746 | 617.2909 | 1216.5481 | 608.7777 | 1215.5640 | 608.2857 | 11 |
| 28 | 3165.6401 | 1583.3237 | 3148.6136 | 1574.8104 | 3147.6296 | 1574.3184 | L | 1086.5062 | 543.7567 | 1069.4796 | 535.2435 | 1068.4956 | 534.7515 | 10 |
| 29 | 3280.6671 | 1640.8372 | 3263.6405 | 1632.3239 | 3262.6565 | 1631.8319 | N | 973.4221  | 487.2147 | 956.3956  | 478.7014 | 955.4116  | 478.2094 | 9  |
| 30 | 3417.7260 | 1709.3666 | 3400.6994 | 1700.8534 | 3399.7154 | 1700.3614 | H | 858.3952  | 429.7012 | 841.3686  | 421.1880 | 840.3846  | 420.6959 | 8  |
| 31 | 3504.7580 | 1752.8826 | 3487.7315 | 1744.3694 | 3486.7475 | 1743.8774 | S | 721.3363  | 361.1718 | 704.3097  | 352.6585 | 703.3257  | 352.1665 | 7  |
| 32 | 3633.8006 | 1817.4039 | 3616.7741 | 1808.8907 | 3615.7900 | 1808.3987 | E | 634.3042  | 317.6558 | 617.2777  | 309.1425 | 616.2937  | 308.6505 | 6  |
| 33 | 3748.8276 | 1874.9174 | 3731.8010 | 1866.4041 | 3730.8170 | 1865.9121 | N | 505.2617  | 253.1345 | 488.2351  | 244.6212 | 487.2511  | 244.1292 | 5  |
| 34 | 3819.8647 | 1910.4360 | 3802.8381 | 1901.9227 | 3801.8541 | 1901.4307 | A | 390.2347  | 195.6210 | 373.2082  | 187.1077 | 372.2241  | 186.6157 | 4  |
| 35 | 3920.9123 | 1960.9598 | 3903.8858 | 1952.4465 | 3902.9018 | 1951.9545 | T | 319.1976  | 160.1024 | 302.1710  | 151.5892 | 301.1870  | 151.0972 | 3  |
| 36 | 3991.9495 | 1996.4784 | 3974.9229 | 1987.9651 | 3973.9389 | 1987.4731 | A | 218.1499  | 109.5786 | 201.1234  | 101.0653 |           |          | 2  |
| 37 |           |           |           |           |           |           | K | 147.1128  | 74.0600  | 130.0863  | 65.5468  |           |          | 1  |

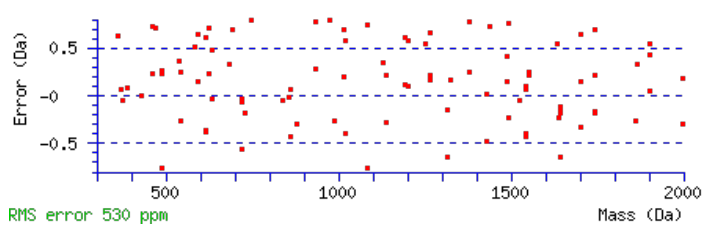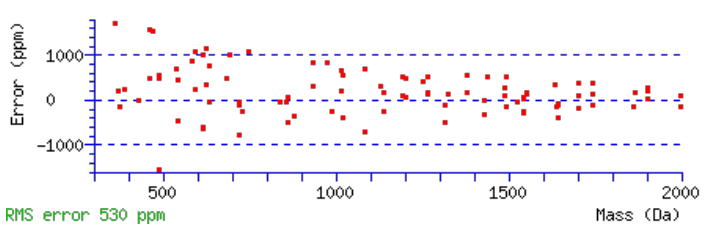

NCBI BLAST search of [MVSHHNLTGATLINEQWLLTTAKNLFNLHSENATAK](#)  
 (Parameters: blastp, nr protein database, expect=20000, no filter, PAM30)  
 Other BLAST [web gateways](#)

All matches to this query

| Score | Mr(calc)  | Delta  | Sequence                                             | Site Analysis                   |
|-------|-----------|--------|------------------------------------------------------|---------------------------------|
| 109.8 | 4137.0477 | 0.0102 | <a href="#">MVSHHNLTGATLINEQWLLTTAKNLFNLHSENATAK</a> | Deamidated N25, N29, N33 51.65% |
| 109.0 | 4137.0477 | 0.0102 | <a href="#">MVSHHNLTGATLINEQWLLTTAKNLFNLHSENATAK</a> | Deamidated N6, N29, N33 43.46%  |
| 99.0  | 4137.0477 | 0.0102 | <a href="#">MVSHHNLTGATLINEQWLLTTAKNLFNLHSENATAK</a> | Deamidated Q17, N25, N29 4.37%  |
| 96.5  | 4136.0636 | 0.9943 | <a href="#">MVSHHNLTGATLINEQWLLTTAKNLFNLHSENATAK</a> |                                 |
| 96.5  | 4136.0636 | 0.9943 | <a href="#">MVSHHNLTGATLINEQWLLTTAKNLFNLHSENATAK</a> |                                 |
| 87.6  | 4136.0636 | 0.9943 | <a href="#">MVSHHNLTGATLINEQWLLTTAKNLFNLHSENATAK</a> |                                 |
| 85.4  | 4137.0477 | 0.0102 | <a href="#">MVSHHNLTGATLINEQWLLTTAKNLFNLHSENATAK</a> | Deamidated N6, N15, N33 0.19%   |
| 84.3  | 4136.0636 | 0.9943 | <a href="#">MVSHHNLTGATLINEQWLLTTAKNLFNLHSENATAK</a> |                                 |
| 83.9  | 4136.0636 | 0.9943 | <a href="#">MVSHHNLTGATLINEQWLLTTAKNLFNLHSENATAK</a> |                                 |
| 77.0  | 4136.0636 | 0.9943 | <a href="#">MVSHHNLTGATLINEQWLLTTAKNLFNLHSENATAK</a> |                                 |

Mascot: <http://www.matrixscience.com/>

# MATRIX SCIENCE Mascot Search Results

## Peptide View

MS/MS Fragmentation of **MVSHHNLTTGATLINEQWLLTTAKNLFNLHSENA**TAK

Found in **J3QR68** in **con\_Xuniprot\_HUMAN3**, J3QR68\_HUMAN Haptoglobin (Fragment) OS=Homo sapiens GN=HP PE=3 SV=1

Match to Query 28827: 4137.066816 from(1035.273980,4+) intensity(90584.1250) rtinseconds(2524) scans(6569) index(4030)

Title: 111019\_Est\_ISCardio\_NMI\_YP\_G\_6Spectrum5371\_scans\_\_6569

Data file C:\mascot\20140703\_Tmgf\_1D\CSV\_UseAnalysis\MasterCSV\All\_Glyco\mgf\ptm\UC18ERLIC\_PTM\_35D.mgf

Click mouse within plot area to zoom in by factor of two about that point

Or, to Da

Label all possible matches Label matches used for scoring

Show Y-axis

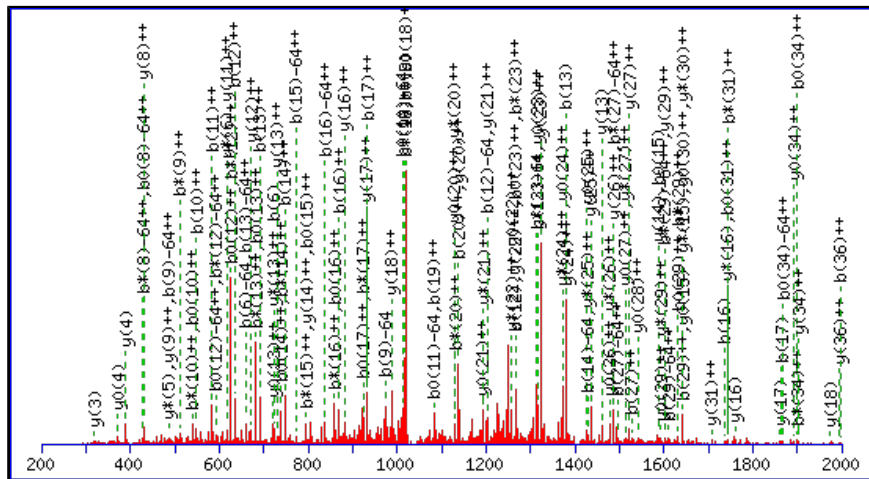

Monoisotopic mass of neutral peptide Mr(calc): 4137.0477

Fixed modifications: Carbamidomethyl (C) (apply to specified residues or termini only)

Variable modifications:

M1 : Oxidation (M), with neutral losses 0.0000 (shown in table), 63.9983

Q17 : Deamidated (NQ)

N25 : Deamidated (NQ)

N29 : Deamidated (NQ)

Ions Score: 109 Expect: 2.5e-009

Matches : 124/616 fragment ions using 155 most intense peaks (help)

| #  | b         | b <sup>++</sup> | b <sup>*</sup> | b <sup>*++</sup> | b <sup>0</sup> | b <sup>0++</sup> | Seq. | y         | y <sup>++</sup> | y <sup>*</sup> | y <sup>*++</sup> | y <sup>0</sup> | y <sup>0++</sup> | #  |
|----|-----------|-----------------|----------------|------------------|----------------|------------------|------|-----------|-----------------|----------------|------------------|----------------|------------------|----|
| 1  | 148.0427  | 74.5250         |                |                  |                |                  | M    |           |                 |                |                  |                |                  | 37 |
| 2  | 247.1111  | 124.0592        |                |                  |                |                  | V    | 3991.0196 | 1996.0134       | 3973.9930      | 1987.5002        | 3973.0090      | 1987.0081        | 36 |
| 3  | 334.1431  | 167.5752        |                |                  | 316.1326       | 158.5699         | S    | 3891.9512 | 1946.4792       | 3874.9246      | 1937.9660        | 3873.9406      | 1937.4739        | 35 |
| 4  | 471.2020  | 236.1047        |                |                  | 453.1915       | 227.0994         | H    | 3804.9191 | 1902.9632       | 3787.8926      | 1894.4499        | 3786.9086      | 1893.9579        | 34 |
| 5  | 608.2609  | 304.6341        |                |                  | 590.2504       | 295.6288         | H    | 3667.8602 | 1834.4338       | 3650.8337      | 1825.9205        | 3649.8497      | 1825.4285        | 33 |
| 6  | 722.3039  | 361.6556        | 705.2773       | 353.1423         | 704.2933       | 352.6503         | N    | 3530.8013 | 1765.9043       | 3513.7748      | 1757.3910        | 3512.7908      | 1756.8990        | 32 |
| 7  | 835.3879  | 418.1976        | 818.3614       | 409.6843         | 817.3774       | 409.1923         | L    | 3416.7584 | 1708.8828       | 3399.7318      | 1700.3696        | 3398.7478      | 1699.8776        | 31 |
| 8  | 936.4356  | 468.7214        | 919.4091       | 460.2082         | 918.4250       | 459.7162         | T    | 3303.6743 | 1652.3408       | 3286.6478      | 1643.8275        | 3285.6638      | 1643.3355        | 30 |
| 9  | 1037.4833 | 519.2453        | 1020.4567      | 510.7320         | 1019.4727      | 510.2400         | T    | 3202.6267 | 1601.8170       | 3185.6001      | 1593.3037        | 3184.6161      | 1592.8117        | 29 |
| 10 | 1094.5048 | 547.7560        | 1077.4782      | 539.2427         | 1076.4942      | 538.7507         | G    | 3101.5790 | 1551.2931       | 3084.5524      | 1542.7799        | 3083.5684      | 1542.2878        | 28 |
| 11 | 1165.5419 | 583.2746        | 1148.5153      | 574.7613         | 1147.5313      | 574.2693         | A    | 3044.5575 | 1522.7824       | 3027.5310      | 1514.2691        | 3026.5469      | 1513.7771        | 27 |
| 12 | 1266.5895 | 633.7984        | 1249.5630      | 625.2851         | 1248.5790      | 624.7931         | T    | 2973.5204 | 1487.2638       | 2956.4938      | 1478.7506        | 2955.5098      | 1478.2586        | 26 |
| 13 | 1379.6736 | 690.3404        | 1362.6471      | 681.8272         | 1361.6630      | 681.3352         | L    | 2872.4727 | 1436.7400       | 2855.4462      | 1428.2267        | 2854.4622      | 1427.7347        | 25 |
| 14 | 1492.7577 | 746.8825        | 1475.7311      | 738.3692         | 1474.7471      | 737.8772         | I    | 2759.3887 | 1380.1980       | 2742.3621      | 1371.6847        | 2741.3781      | 1371.1927        | 24 |
| 15 | 1606.8006 | 803.9039        | 1589.7741      | 795.3907         | 1588.7900      | 794.8987         | N    | 2646.3046 | 1323.6559       | 2629.2780      | 1315.1427        | 2628.2940      | 1314.6506        | 23 |
| 16 | 1735.8432 | 868.4252        | 1718.8166      | 859.9120         | 1717.8326      | 859.4200         | E    | 2532.2617 | 1266.6345       | 2515.2351      | 1258.1212        | 2514.2511      | 1257.6292        | 22 |
| 17 | 1864.8858 | 932.9465        | 1847.8592      | 924.4333         | 1846.8752      | 923.9413         | Q    | 2403.2191 | 1202.1132       | 2386.1925      | 1193.5999        | 2385.2085      | 1193.1079        | 21 |
| 18 | 2050.9651 | 1025.9862       | 2033.9386      | 1017.4729        | 2032.9545      | 1016.9809        | W    | 2274.1765 | 1137.5919       | 2257.1499      | 1129.0786        | 2256.1659      | 1128.5866        | 20 |
| 19 | 2164.0492 | 1082.5282       | 2147.0226      | 1074.0149        | 2146.0386      | 1073.5229        | L    | 2088.0972 | 1044.5522       | 2071.0706      | 1036.0389        | 2070.0866      | 1035.5469        | 19 |
| 20 | 2277.1332 | 1139.0703       | 2260.1067      | 1130.5570        | 2259.1227      | 1130.0650        | L    | 1975.0131 | 988.0102        | 1957.9865      | 979.4969         | 1957.0025      | 979.0049         | 18 |
| 21 | 2378.1809 | 1189.5941       | 2361.1544      | 1181.0808        | 2360.1703      | 1180.5888        | T    | 1861.9290 | 931.4682        | 1844.9025      | 922.9549         | 1843.9185      | 922.4629         | 17 |



|    |           |           |           |           |           |           |   |           |          |           |          |           |          |    |
|----|-----------|-----------|-----------|-----------|-----------|-----------|---|-----------|----------|-----------|----------|-----------|----------|----|
| 22 | 2479.2286 | 1240.1179 | 2462.2020 | 1231.6047 | 2461.2180 | 1231.1126 | T | 1760.8814 | 880.9443 | 1743.8548 | 872.4310 | 1742.8708 | 871.9390 | 16 |
| 23 | 2550.2657 | 1275.6365 | 2533.2392 | 1267.1232 | 2532.2551 | 1266.6312 | A | 1659.8337 | 830.4205 | 1642.8071 | 821.9072 | 1641.8231 | 821.4152 | 15 |
| 24 | 2678.3607 | 1339.6840 | 2661.3341 | 1331.1707 | 2660.3501 | 1330.6787 | K | 1588.7966 | 794.9019 | 1571.7700 | 786.3886 | 1570.7860 | 785.8966 | 14 |
| 25 | 2793.3876 | 1397.1974 | 2776.3611 | 1388.6842 | 2775.3770 | 1388.1922 | N | 1460.7016 | 730.8544 | 1443.6750 | 722.3412 | 1442.6910 | 721.8492 | 13 |
| 26 | 2906.4717 | 1453.7395 | 2889.4451 | 1445.2262 | 2888.4611 | 1444.7342 | L | 1345.6747 | 673.3410 | 1328.6481 | 664.8277 | 1327.6641 | 664.3357 | 12 |
| 27 | 3053.5401 | 1527.2737 | 3036.5135 | 1518.7604 | 3035.5295 | 1518.2684 | F | 1232.5906 | 616.7989 | 1215.5640 | 608.2857 | 1214.5800 | 607.7937 | 11 |
| 28 | 3166.6242 | 1583.8157 | 3149.5976 | 1575.3024 | 3148.6136 | 1574.8104 | L | 1085.5222 | 543.2647 | 1068.4956 | 534.7515 | 1067.5116 | 534.2594 | 10 |
| 29 | 3281.6511 | 1641.3292 | 3264.6245 | 1632.8159 | 3263.6405 | 1632.3239 | N | 972.4381  | 486.7227 | 955.4116  | 478.2094 | 954.4275  | 477.7174 | 9  |
| 30 | 3418.7100 | 1709.8586 | 3401.6835 | 1701.3454 | 3400.6994 | 1700.8534 | H | 857.4112  | 429.2092 | 840.3846  | 420.6959 | 839.4006  | 420.2039 | 8  |
| 31 | 3505.7420 | 1753.3747 | 3488.7155 | 1744.8614 | 3487.7315 | 1744.3694 | S | 720.3523  | 360.6798 | 703.3257  | 352.1665 | 702.3417  | 351.6745 | 7  |
| 32 | 3634.7846 | 1817.8960 | 3617.7581 | 1809.3827 | 3616.7741 | 1808.8907 | E | 633.3202  | 317.1638 | 616.2937  | 308.6505 | 615.3097  | 308.1585 | 6  |
| 33 | 3748.8276 | 1874.9174 | 3731.8010 | 1866.4041 | 3730.8170 | 1865.9121 | N | 504.2776  | 252.6425 | 487.2511  | 244.1292 | 486.2671  | 243.6372 | 5  |
| 34 | 3819.8647 | 1910.4360 | 3802.8381 | 1901.9227 | 3801.8541 | 1901.4307 | A | 390.2347  | 195.6210 | 373.2082  | 187.1077 | 372.2241  | 186.6157 | 4  |
| 35 | 3920.9123 | 1960.9598 | 3903.8858 | 1952.4465 | 3902.9018 | 1951.9545 | T | 319.1976  | 160.1024 | 302.1710  | 151.5892 | 301.1870  | 151.0972 | 3  |
| 36 | 3991.9495 | 1996.4784 | 3974.9229 | 1987.9651 | 3973.9389 | 1987.4731 | A | 218.1499  | 109.5786 | 201.1234  | 101.0653 |           |          | 2  |
| 37 |           |           |           |           |           |           | K | 147.1128  | 74.0600  | 130.0863  | 65.5468  |           |          | 1  |

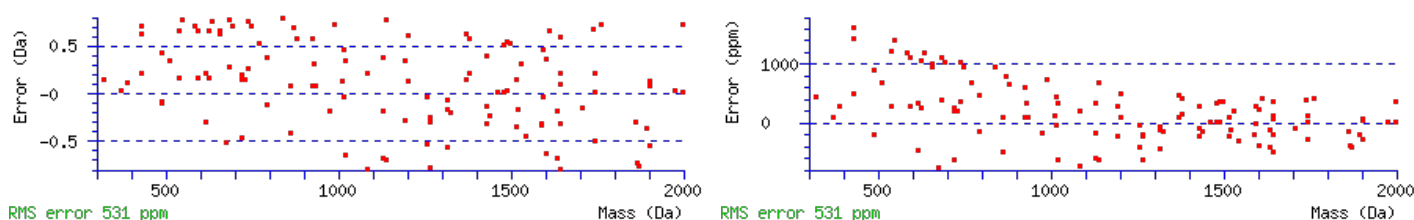

NCBI BLAST search of [MVSHHNLTGATLINEQWLLTTAKNLFNLHSENATAK](#)

(Parameters: blastp, nr protein database, expect=20000, no filter, PAM30)

Other BLAST [web gateways](#)

All matches to this query

| Score | Mr(calc)  | Delta  | Sequence                                             | Site Analysis                   |
|-------|-----------|--------|------------------------------------------------------|---------------------------------|
| 109.1 | 4137.0477 | 0.0192 | <a href="#">MVSHHNLTGATLINEQWLLTTAKNLFNLHSENATAK</a> | Deamidated Q17, N25, N29 78.02% |
| 102.4 | 4137.0477 | 0.0192 | <a href="#">MVSHHNLTGATLINEQWLLTTAKNLFNLHSENATAK</a> | Deamidated N6, N29, N33 16.76%  |
| 96.3  | 4137.0477 | 0.0192 | <a href="#">MVSHHNLTGATLINEQWLLTTAKNLFNLHSENATAK</a> | Deamidated N25, N29, N33 4.14%  |
| 92.3  | 4136.0636 | 1.0032 | <a href="#">MVSHHNLTGATLINEQWLLTTAKNLFNLHSENATAK</a> |                                 |
| 92.2  | 4136.0636 | 1.0032 | <a href="#">MVSHHNLTGATLINEQWLLTTAKNLFNLHSENATAK</a> |                                 |
| 88.9  | 4137.0477 | 0.0192 | <a href="#">MVSHHNLTGATLINEQWLLTTAKNLFNLHSENATAK</a> | Deamidated N6, N15, N33 0.75%   |
| 83.1  | 4136.0636 | 1.0032 | <a href="#">MVSHHNLTGATLINEQWLLTTAKNLFNLHSENATAK</a> |                                 |
| 77.0  | 4136.0636 | 1.0032 | <a href="#">MVSHHNLTGATLINEQWLLTTAKNLFNLHSENATAK</a> |                                 |
| 76.2  | 4136.0636 | 1.0032 | <a href="#">MVSHHNLTGATLINEQWLLTTAKNLFNLHSENATAK</a> |                                 |
| 74.2  | 4136.0636 | 1.0032 | <a href="#">MVSHHNLTGATLINEQWLLTTAKNLFNLHSENATAK</a> |                                 |

Mascot: <http://www.matrixscience.com/>

# MATRIX SCIENCE Mascot Search Results

## Peptide View

MS/MS Fragmentation of **MVSHHNLTTGATLINEQWLLTTAKNLFNLHSENATAK**

Found in **J3QR68** in **con\_Xuniprot\_HUMAN3**, J3QR68\_HUMAN Haptoglobin (Fragment) OS=Homo sapiens GN=HP PE=3 SV=1

Match to Query 28629: 4122.088096 from(1031.529300,4+) intensity(0.0000) rtinseconds(2475) scans(6350) index(22344)

Title: 111019\_Est\_MI\_YS\_G\_02Spectrum5519\_scans\_\_6350

Data file C:\mascot\20140703\_Tmgf\_1D\CSV\_UseAnalysis\MasterCSV\All\_Glyco\mgf\ptm\UC18ERLIC\_PTM\_35D.mgf

Click mouse within plot area to zoom in by factor of two about that point

Or, to Da

Label all possible matches Label matches used for scoring

Show Y-axis

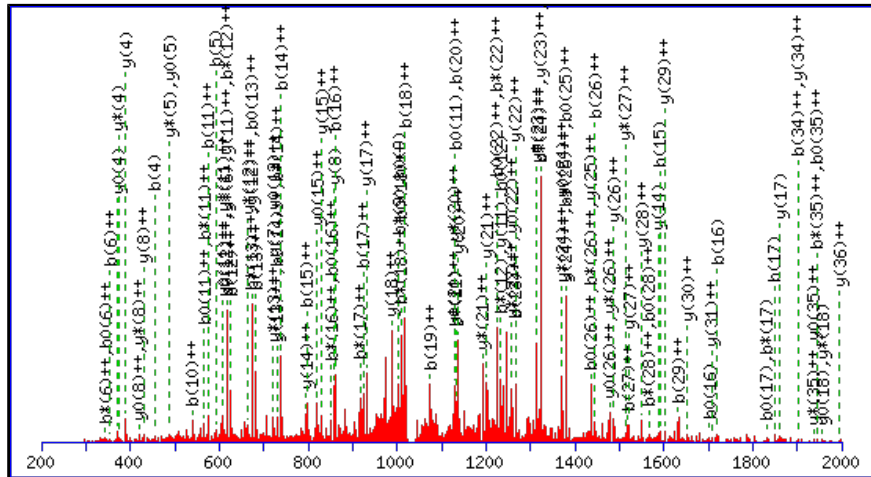

Monoisotopic mass of neutral peptide Mr(calc): 4120.0687

Fixed modifications: Carbamidomethyl (C) (apply to specified residues or termini only)

Variable modifications:

N15 : Deamidated (NQ)

N33 : Deamidated (NQ)

Ions Score: 106 Expect: 3.9e-009

Matches : 115/414 fragment ions using 153 most intense peaks (help)

| #  | b         | b <sup>++</sup> | b <sup>*</sup> | b <sup>*++</sup> | b <sup>0</sup> | b <sup>0++</sup> | Seq. | y         | y <sup>++</sup> | y <sup>*</sup> | y <sup>*++</sup> | y <sup>0</sup> | y <sup>0++</sup> | #  |
|----|-----------|-----------------|----------------|------------------|----------------|------------------|------|-----------|-----------------|----------------|------------------|----------------|------------------|----|
| 1  | 132.0478  | 66.5275         |                |                  |                |                  | M    |           |                 |                |                  |                |                  | 37 |
| 2  | 231.1162  | 116.0617        |                |                  |                |                  | V    | 3990.0356 | 1995.5214       | 3973.0090      | 1987.0081        | 3972.0250      | 1986.5161        | 36 |
| 3  | 318.1482  | 159.5777        |                |                  | 300.1376       | 150.5725         | S    | 3890.9672 | 1945.9872       | 3873.9406      | 1937.4739        | 3872.9566      | 1936.9819        | 35 |
| 4  | 455.2071  | 228.1072        |                |                  | 437.1966       | 219.1019         | H    | 3803.9351 | 1902.4712       | 3786.9086      | 1893.9579        | 3785.9246      | 1893.4659        | 34 |
| 5  | 592.2660  | 296.6367        |                |                  | 574.2555       | 287.6314         | H    | 3666.8762 | 1833.9417       | 3649.8497      | 1825.4285        | 3648.8657      | 1824.9365        | 33 |
| 6  | 706.3090  | 353.6581        | 689.2824       | 345.1448         | 688.2984       | 344.6528         | N    | 3529.8173 | 1765.4123       | 3512.7908      | 1756.8990        | 3511.8067      | 1756.4070        | 32 |
| 7  | 819.3930  | 410.2001        | 802.3665       | 401.6869         | 801.3825       | 401.1949         | L    | 3415.7744 | 1708.3908       | 3398.7478      | 1699.8776        | 3397.7638      | 1699.3855        | 31 |
| 8  | 920.4407  | 460.7240        | 903.4141       | 452.2107         | 902.4301       | 451.7187         | T    | 3302.6903 | 1651.8488       | 3285.6638      | 1643.3355        | 3284.6798      | 1642.8435        | 30 |
| 9  | 1021.4884 | 511.2478        | 1004.4618      | 502.7346         | 1003.4778      | 502.2425         | T    | 3201.6426 | 1601.3250       | 3184.6161      | 1592.8117        | 3183.6321      | 1592.3197        | 29 |
| 10 | 1078.5098 | 539.7586        | 1061.4833      | 531.2453         | 1060.4993      | 530.7533         | G    | 3100.5950 | 1550.8011       | 3083.5684      | 1542.2878        | 3082.5844      | 1541.7958        | 28 |
| 11 | 1149.5470 | 575.2771        | 1132.5204      | 566.7638         | 1131.5364      | 566.2718         | A    | 3043.5735 | 1522.2904       | 3026.5469      | 1513.7771        | 3025.5629      | 1513.2851        | 27 |
| 12 | 1250.5946 | 625.8010        | 1233.5681      | 617.2877         | 1232.5841      | 616.7957         | T    | 2972.5364 | 1486.7718       | 2955.5098      | 1478.2586        | 2954.5258      | 1477.7665        | 26 |
| 13 | 1363.6787 | 682.3430        | 1346.6521      | 673.8297         | 1345.6681      | 673.3377         | L    | 2871.4887 | 1436.2480       | 2854.4622      | 1427.7347        | 2853.4781      | 1427.2427        | 25 |
| 14 | 1476.7628 | 738.8850        | 1459.7362      | 730.3717         | 1458.7522      | 729.8797         | I    | 2758.4046 | 1379.7060       | 2741.3781      | 1371.1927        | 2740.3941      | 1370.7007        | 24 |
| 15 | 1591.7897 | 796.3985        | 1574.7632      | 787.8852         | 1573.7791      | 787.3932         | N    | 2645.3206 | 1323.1639       | 2628.2940      | 1314.6506        | 2627.3100      | 1314.1586        | 23 |
| 16 | 1720.8323 | 860.9198        | 1703.8057      | 852.4065         | 1702.8217      | 851.9145         | E    | 2530.2936 | 1265.6505       | 2513.2671      | 1257.1372        | 2512.2831      | 1256.6452        | 22 |
| 17 | 1848.8909 | 924.9491        | 1831.8643      | 916.4358         | 1830.8803      | 915.9438         | Q    | 2401.2510 | 1201.1292       | 2384.2245      | 1192.6159        | 2383.2405      | 1192.1239        | 21 |
| 18 | 2034.9702 | 1017.9887       | 2017.9436      | 1009.4755        | 2016.9596      | 1008.9834        | W    | 2273.1925 | 1137.0999       | 2256.1659      | 1128.5866        | 2255.1819      | 1128.0946        | 20 |
| 19 | 2148.0543 | 1074.5308       | 2131.0277      | 1066.0175        | 2130.0437      | 1065.5255        | L    | 2087.1131 | 1044.0602       | 2070.0866      | 1035.5469        | 2069.1026      | 1035.0549        | 19 |
| 20 | 2261.1383 | 1131.0728       | 2244.1118      | 1122.5595        | 2243.1278      | 1122.0675        | L    | 1974.0291 | 987.5182        | 1957.0025      | 979.0049         | 1956.0185      | 978.5129         | 18 |
| 21 | 2362.1860 | 1181.5966       | 2345.1594      | 1173.0834        | 2344.1754      | 1172.5914        | T    | 1860.9450 | 930.9761        | 1843.9185      | 922.4629         | 1842.9345      | 921.9709         | 17 |
| 22 | 2463.2337 | 1232.1205       | 2446.2071      | 1223.6072        | 2445.2231      | 1223.1152        | T    | 1759.8973 | 880.4523        | 1742.8708      | 871.9390         | 1741.8868      | 871.4470         | 16 |



|    |           |                  |           |                  |           |                  |   |                  |                 |                 |                 |                 |                 |    |
|----|-----------|------------------|-----------|------------------|-----------|------------------|---|------------------|-----------------|-----------------|-----------------|-----------------|-----------------|----|
| 23 | 2534.2708 | <b>1267.6390</b> | 2517.2442 | 1259.1258        | 2516.2602 | 1258.6337        | A | 1658.8497        | <b>829.9285</b> | 1641.8231       | 821.4152        | 1640.8391       | <b>820.9232</b> | 15 |
| 24 | 2662.3658 | 1331.6865        | 2645.3392 | <b>1323.1732</b> | 2644.3552 | <b>1322.6812</b> | K | <b>1587.8125</b> | <b>794.4099</b> | 1570.7860       | 785.8966        | 1569.8020       | 785.4046        | 14 |
| 25 | 2776.4087 | 1388.7080        | 2759.3821 | <b>1380.1947</b> | 2758.3981 | <b>1379.7027</b> | N | 1459.7176        | <b>730.3624</b> | 1442.6910       | <b>721.8492</b> | 1441.7070       | <b>721.3571</b> | 13 |
| 26 | 2889.4927 | <b>1445.2500</b> | 2872.4662 | <b>1436.7367</b> | 2871.4822 | <b>1436.2447</b> | L | 1345.6747        | <b>673.3410</b> | 1328.6481       | <b>664.8277</b> | 1327.6641       | 664.3357        | 12 |
| 27 | 3036.5612 | <b>1518.7842</b> | 3019.5346 | 1510.2709        | 3018.5506 | 1509.7789        | F | <b>1232.5906</b> | <b>616.7989</b> | 1215.5640       | <b>608.2857</b> | 1214.5800       | <b>607.7937</b> | 11 |
| 28 | 3149.6452 | 1575.3262        | 3132.6187 | <b>1566.8130</b> | 3131.6347 | <b>1566.3210</b> | L | 1085.5222        | 543.2647        | 1068.4956       | 534.7515        | 1067.5116       | 534.2594        | 10 |
| 29 | 3263.6881 | <b>1632.3477</b> | 3246.6616 | 1623.8344        | 3245.6776 | 1623.3424        | N | 972.4381         | 486.7227        | 955.4116        | 478.2094        | 954.4275        | 477.7174        | 9  |
| 30 | 3400.7471 | 1700.8772        | 3383.7205 | 1692.3639        | 3382.7365 | 1691.8719        | H | <b>858.3952</b>  | <b>429.7012</b> | 841.3686        | <b>421.1880</b> | 840.3846        | <b>420.6959</b> | 8  |
| 31 | 3487.7791 | 1744.3932        | 3470.7525 | 1735.8799        | 3469.7685 | 1735.3879        | S | <b>721.3363</b>  | 361.1718        | 704.3097        | 352.6585        | 703.3257        | 352.1665        | 7  |
| 32 | 3616.8217 | 1808.9145        | 3599.7951 | 1800.4012        | 3598.8111 | 1799.9092        | E | 634.3042         | 317.6558        | <b>617.2777</b> | 309.1425        | 616.2937        | 308.6505        | 6  |
| 33 | 3731.8486 | 1866.4279        | 3714.8221 | 1857.9147        | 3713.8381 | 1857.4227        | N | 505.2617         | 253.1345        | <b>488.2351</b> | 244.6212        | <b>487.2511</b> | 244.1292        | 5  |
| 34 | 3802.8857 | <b>1901.9465</b> | 3785.8592 | 1893.4332        | 3784.8752 | 1892.9412        | A | <b>390.2347</b>  | 195.6210        | <b>373.2082</b> | 187.1077        | <b>372.2241</b> | 186.6157        | 4  |
| 35 | 3903.9334 | 1952.4703        | 3886.9069 | <b>1943.9571</b> | 3885.9229 | <b>1943.4651</b> | T | 319.1976         | 160.1024        | 302.1710        | 151.5892        | 301.1870        | 151.0972        | 3  |
| 36 | 3974.9705 | 1987.9889        | 3957.9440 | 1979.4756        | 3956.9600 | 1978.9836        | A | 218.1499         | 109.5786        | 201.1234        | 101.0653        |                 |                 | 2  |
| 37 |           |                  |           |                  |           |                  | K | 147.1128         | 74.0600         | 130.0863        | 65.5468         |                 |                 | 1  |

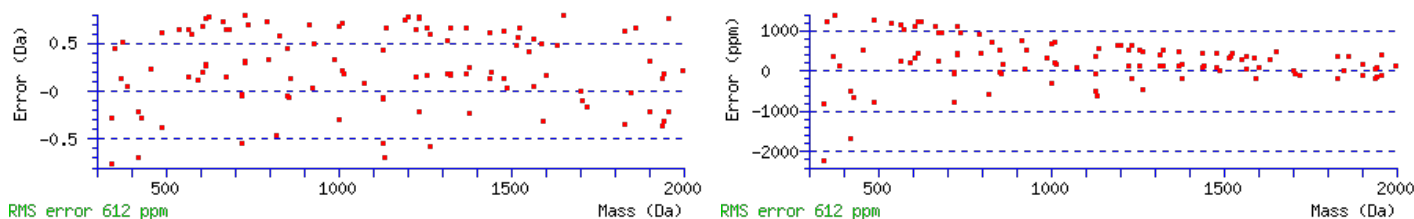

NCBI BLAST search of [MVSHHNLTGATLINEQWLLTTAKNLFNHSENATAK](#)

(Parameters: blastp, nr protein database, expect=20000, no filter, PAM30)

Other BLAST [web gateways](#)

All matches to this query

| Score | Mr(calc)  | Delta  | Sequence                                            | Site Analysis              |
|-------|-----------|--------|-----------------------------------------------------|----------------------------|
| 106.3 | 4120.0687 | 2.0194 | <a href="#">MVSHHNLTGATLINEQWLLTTAKNLFNHSENATAK</a> | Deamidated N15, N33 77.89% |
| 98.9  | 4120.0687 | 2.0194 | <a href="#">MVSHHNLTGATLINEQWLLTTAKNLFNHSENATAK</a> | Deamidated N29, N33 14.21% |
| 90.7  | 4120.0687 | 2.0194 | <a href="#">MVSHHNLTGATLINEQWLLTTAKNLFNHSENATAK</a> | Deamidated N25, N33 2.11%  |
| 89.5  | 4120.0687 | 2.0194 | <a href="#">MVSHHNLTGATLINEQWLLTTAKNLFNHSENATAK</a> | Deamidated N25, N29 1.64%  |
| 89.4  | 4120.0687 | 2.0194 | <a href="#">MVSHHNLTGATLINEQWLLTTAKNLFNHSENATAK</a> | Deamidated N15, N29 1.58%  |
| 87.7  | 4120.0687 | 2.0194 | <a href="#">MVSHHNLTGATLINEQWLLTTAKNLFNHSENATAK</a> | Deamidated N6, N33 1.06%   |
| 87.1  | 4120.0687 | 2.0194 | <a href="#">MVSHHNLTGATLINEQWLLTTAKNLFNHSENATAK</a> | Deamidated Q17, N33 0.93%  |
| 83.3  | 4120.0687 | 2.0194 | <a href="#">MVSHHNLTGATLINEQWLLTTAKNLFNHSENATAK</a> | Deamidated Q17, N29 0.39%  |
| 78.3  | 4120.0687 | 2.0194 | <a href="#">MVSHHNLTGATLINEQWLLTTAKNLFNHSENATAK</a> | Deamidated N6, N29 0.12%   |
| 68.8  | 4120.0687 | 2.0194 | <a href="#">MVSHHNLTGATLINEQWLLTTAKNLFNHSENATAK</a> | Deamidated N15, N25 0.01%  |

Mascot: <http://www.matrixscience.com/>

# MASCOT SCIENCE Mascot Search Results

## Peptide View

MS/MS Fragmentation of **MVSHHNLTTGATLINEQWLLTTAKNLFNLHSEENATAK**

Found in **J3QR68** in **con\_Xuniprot\_HUMAN3**, J3QR68\_HUMAN Haptoglobin (Fragment) OS=Homo sapiens GN=HP PE=3 SV=1

Match to Query 28382: 4120.079776 from(1031.027220,4+) intensity(0.0000) rtinseconds(2733) scans(7279) index(27026)

Title: 111019\_Est\_MI\_YS\_G\_09Spectrum6383\_scans\_\_7279

Data file C:\mascot\20140703\_Tmgf\_1D\CSV\_UseAnalysis\MasterCSV\All\_Glyco\mgf\ptm\UC18ERLIC\_PTM\_35D.mgf

Click mouse within plot area to zoom in by factor of two about that point

Or, to Da

Label all possible matches Label matches used for scoring

Show Y-axis

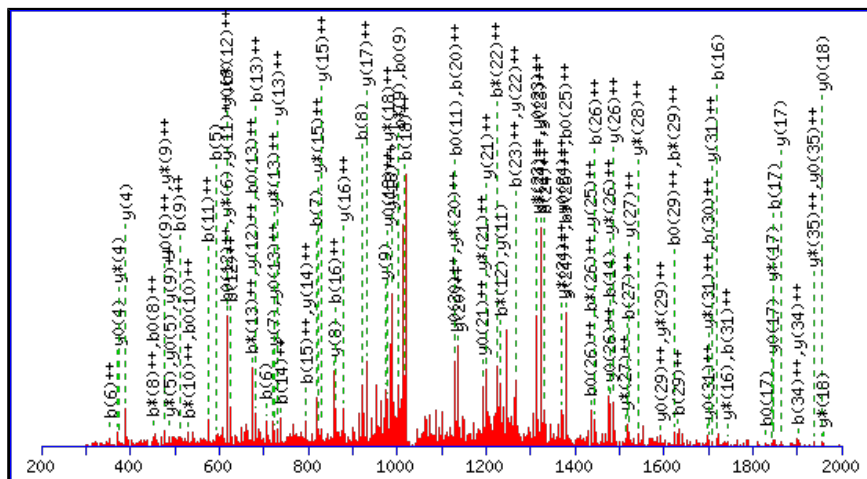

Monoisotopic mass of neutral peptide Mr(calc): 4120.0687

Fixed modifications: Carbamidomethyl (C) (apply to specified residues or termini only)

Variable modifications:

N29 : Deamidated (NQ)

N33 : Deamidated (NQ)

Ions Score: 105 Expect: 6e-009

Matches : 107/414 fragment ions using 136 most intense peaks ([help](#))

| #  | b                | b <sup>++</sup>  | b <sup>*</sup>   | b <sup>*++</sup> | b <sup>0</sup>   | b <sup>0++</sup> | Seq.     | y                | y <sup>++</sup>  | y <sup>*</sup>   | y <sup>*++</sup> | y <sup>0</sup>   | y <sup>0++</sup> | #         |
|----|------------------|------------------|------------------|------------------|------------------|------------------|----------|------------------|------------------|------------------|------------------|------------------|------------------|-----------|
| 1  | 132.0478         | 66.5275          |                  |                  |                  |                  | <b>M</b> |                  |                  |                  |                  |                  |                  | <b>37</b> |
| 2  | 231.1162         | 116.0617         |                  |                  |                  |                  | <b>V</b> | 3990.0356        | 1995.5214        | 3973.0090        | 1987.0081        | 3972.0250        | 1986.5161        | <b>36</b> |
| 3  | 318.1482         | 159.5777         |                  |                  | 300.1376         | 150.5725         | <b>S</b> | 3890.9672        | 1945.9872        | 3873.9406        | <b>1937.4739</b> | 3872.9566        | <b>1936.9819</b> | <b>35</b> |
| 4  | 455.2071         | 228.1072         |                  |                  | 437.1966         | 219.1019         | <b>H</b> | 3803.9351        | <b>1902.4712</b> | 3786.9086        | 1893.9579        | 3785.9246        | 1893.4659        | <b>34</b> |
| 5  | <b>592.2660</b>  | 296.6367         |                  |                  | 574.2555         | 287.6314         | <b>H</b> | 3666.8762        | 1833.9417        | 3649.8497        | 1825.4285        | 3648.8657        | 1824.9365        | <b>33</b> |
| 6  | <b>706.3090</b>  | <b>353.6581</b>  | 689.2824         | 345.1448         | 688.2984         | 344.6528         | <b>N</b> | 3529.8173        | 1765.4123        | 3512.7908        | 1756.8990        | 3511.8067        | 1756.4070        | <b>32</b> |
| 7  | <b>819.3930</b>  | 410.2001         | 802.3665         | 401.6869         | 801.3825         | 401.1949         | <b>L</b> | 3415.7744        | <b>1708.3908</b> | 3398.7478        | <b>1699.8776</b> | 3397.7638        | <b>1699.3855</b> | <b>31</b> |
| 8  | <b>920.4407</b>  | 460.7240         | 903.4141         | <b>452.2107</b>  | 902.4301         | <b>451.7187</b>  | <b>T</b> | 3302.6903        | 1651.8488        | 3285.6638        | 1643.3355        | 3284.6798        | 1642.8435        | <b>30</b> |
| 9  | 1021.4884        | <b>511.2478</b>  | <b>1004.4618</b> | 502.7346         | <b>1003.4778</b> | 502.2425         | <b>T</b> | 3201.6426        | 1601.3250        | 3184.6161        | <b>1592.8117</b> | 3183.6321        | <b>1592.3197</b> | <b>29</b> |
| 10 | 1078.5098        | 539.7586         | 1061.4833        | <b>531.2453</b>  | 1060.4993        | <b>530.7533</b>  | <b>G</b> | 3100.5950        | 1550.8011        | 3083.5684        | <b>1542.2878</b> | 3082.5844        | 1541.7958        | <b>28</b> |
| 11 | 1149.5470        | <b>575.2771</b>  | 1132.5204        | 566.7638         | <b>1131.5364</b> | 566.2718         | <b>A</b> | 3043.5735        | <b>1522.2904</b> | 3026.5469        | <b>1513.7771</b> | 3025.5629        | 1513.2851        | <b>27</b> |
| 12 | 1250.5946        | <b>625.8010</b>  | <b>1233.5681</b> | <b>617.2877</b>  | 1232.5841        | <b>616.7957</b>  | <b>T</b> | 2972.5364        | <b>1486.7718</b> | 2955.5098        | <b>1478.2586</b> | 2954.5258        | <b>1477.7665</b> | <b>26</b> |
| 13 | 1363.6787        | <b>682.3430</b>  | 1346.6521        | <b>673.8297</b>  | 1345.6681        | <b>673.3377</b>  | <b>L</b> | 2871.4887        | <b>1436.2480</b> | 2854.4622        | 1427.7347        | 2853.4781        | 1427.2427        | <b>25</b> |
| 14 | <b>1476.7628</b> | <b>738.8850</b>  | 1459.7362        | 730.3717         | 1458.7522        | 729.8797         | <b>I</b> | 2758.4046        | <b>1379.7060</b> | 2741.3781        | <b>1371.1927</b> | 2740.3941        | <b>1370.7007</b> | <b>24</b> |
| 15 | 1590.8057        | <b>795.9065</b>  | 1573.7791        | 787.3932         | 1572.7951        | 786.9012         | <b>N</b> | 2645.3206        | <b>1323.1639</b> | 2628.2940        | <b>1314.6506</b> | 2627.3100        | <b>1314.1586</b> | <b>23</b> |
| 16 | <b>1719.8483</b> | <b>860.4278</b>  | 1702.8217        | 851.9145         | 1701.8377        | 851.4225         | <b>E</b> | 2531.2776        | <b>1266.1425</b> | 2514.2511        | 1257.6292        | 2513.2671        | 1257.1372        | <b>22</b> |
| 17 | <b>1847.9069</b> | 924.4571         | 1830.8803        | 915.9438         | <b>1829.8963</b> | 915.4518         | <b>Q</b> | 2402.2351        | <b>1201.6212</b> | 2385.2085        | <b>1193.1079</b> | 2384.2245        | <b>1192.6159</b> | <b>21</b> |
| 18 | 2033.9862        | <b>1017.4967</b> | 2016.9596        | 1008.9834        | 2015.9756        | 1008.4914        | <b>W</b> | 2274.1765        | <b>1137.5919</b> | 2257.1499        | <b>1129.0786</b> | 2256.1659        | <b>1128.5866</b> | <b>20</b> |
| 19 | 2147.0702        | 1074.0388        | 2130.0437        | 1065.5255        | 2129.0597        | 1065.0335        | <b>L</b> | 2088.0972        | 1044.5522        | 2071.0706        | 1036.0389        | 2070.0866        | 1035.5469        | <b>19</b> |
| 20 | 2260.1543        | <b>1130.5808</b> | 2243.1278        | 1122.0675        | 2242.1437        | 1121.5755        | <b>L</b> | 1975.0131        | <b>988.0102</b>  | <b>1957.9865</b> | <b>979.4969</b>  | <b>1957.0025</b> | <b>979.0049</b>  | <b>18</b> |
| 21 | 2361.2020        | 1181.1046        | 2344.1754        | 1172.5914        | 2343.1914        | 1172.0993        | <b>T</b> | <b>1861.9290</b> | <b>931.4682</b>  | <b>1844.9025</b> | 922.9549         | <b>1843.9185</b> | 922.4629         | <b>17</b> |
| 22 | 2462.2497        | 1231.6285        | 2445.2231        | <b>1223.1152</b> | 2444.2391        | 1222.6232        | <b>T</b> | 1760.8814        | <b>880.9443</b>  | <b>1743.8548</b> | 872.4310         | 1742.8708        | 871.9390         | <b>16</b> |

|    |           |                  |           |                  |           |                  |   |                  |                 |                 |                 |                 |                 |           |
|----|-----------|------------------|-----------|------------------|-----------|------------------|---|------------------|-----------------|-----------------|-----------------|-----------------|-----------------|-----------|
| 23 | 2533.2868 | <b>1267.1470</b> | 2516.2602 | 1258.6337        | 2515.2762 | 1258.1417        | A | 1659.8337        | <b>830.4205</b> | 1642.8071       | <b>821.9072</b> | 1641.8231       | 821.4152        | <b>15</b> |
| 24 | 2661.3817 | <b>1331.1945</b> | 2644.3552 | <b>1322.6812</b> | 2643.3712 | 1322.1892        | K | 1588.7966        | <b>794.9019</b> | 1571.7700       | 786.3886        | 1570.7860       | 785.8966        | <b>14</b> |
| 25 | 2775.4247 | 1388.2160        | 2758.3981 | <b>1379.7027</b> | 2757.4141 | <b>1379.2107</b> | N | 1460.7016        | <b>730.8544</b> | 1443.6751       | <b>722.3412</b> | 1442.6910       | <b>721.8492</b> | <b>13</b> |
| 26 | 2888.5087 | <b>1444.7580</b> | 2871.4822 | <b>1436.2447</b> | 2870.4982 | <b>1435.7527</b> | L | 1346.6587        | <b>673.8330</b> | 1329.6321       | 665.3197        | 1328.6481       | 664.8277        | <b>12</b> |
| 27 | 3035.5771 | <b>1518.2922</b> | 3018.5506 | 1509.7789        | 3017.5666 | 1509.2869        | F | <b>1233.5746</b> | <b>617.2909</b> | 1216.5481       | 608.7777        | 1215.5640       | 608.2857        | <b>11</b> |
| 28 | 3148.6612 | 1574.8342        | 3131.6347 | 1566.3210        | 3130.6506 | 1565.8290        | L | 1086.5062        | 543.7567        | 1069.4796       | 535.2435        | 1068.4956       | 534.7515        | <b>10</b> |
| 29 | 3263.6881 | <b>1632.3477</b> | 3246.6616 | <b>1623.8344</b> | 3245.6776 | <b>1623.3424</b> | N | <b>973.4221</b>  | <b>487.2147</b> | 956.3956        | <b>478.7014</b> | 955.4116        | <b>478.2094</b> | <b>9</b>  |
| 30 | 3400.7471 | <b>1700.8772</b> | 3383.7205 | 1692.3639        | 3382.7365 | 1691.8719        | H | <b>858.3952</b>  | 429.7012        | 841.3686        | 421.1880        | 840.3846        | 420.6959        | <b>8</b>  |
| 31 | 3487.7791 | <b>1744.3932</b> | 3470.7525 | 1735.8799        | 3469.7685 | 1735.3879        | S | <b>721.3363</b>  | 361.1718        | 704.3097        | 352.6585        | 703.3257        | 352.1665        | <b>7</b>  |
| 32 | 3616.8217 | 1808.9145        | 3599.7951 | 1800.4012        | 3598.8111 | 1799.9092        | E | 634.3042         | 317.6558        | <b>617.2777</b> | 309.1425        | <b>616.2937</b> | 308.6505        | <b>6</b>  |
| 33 | 3731.8486 | 1866.4279        | 3714.8221 | 1857.9147        | 3713.8381 | 1857.4227        | N | 505.2617         | 253.1345        | <b>488.2351</b> | 244.6212        | <b>487.2511</b> | 244.1292        | <b>5</b>  |
| 34 | 3802.8857 | <b>1901.9465</b> | 3785.8592 | 1893.4332        | 3784.8752 | 1892.9412        | A | <b>390.2347</b>  | 195.6210        | <b>373.2082</b> | 187.1077        | <b>372.2241</b> | 186.6157        | <b>4</b>  |
| 35 | 3903.9334 | 1952.4703        | 3886.9069 | 1943.9571        | 3885.9229 | 1943.4651        | T | 319.1976         | 160.1024        | 302.1710        | 151.5892        | 301.1870        | 151.0972        | <b>3</b>  |
| 36 | 3974.9705 | 1987.9889        | 3957.9440 | 1979.4756        | 3956.9600 | 1978.9836        | A | 218.1499         | 109.5786        | 201.1234        | 101.0653        |                 |                 | <b>2</b>  |
| 37 |           |                  |           |                  |           |                  | K | 147.1128         | 74.0600         | 130.0863        | 65.5468         |                 |                 | <b>1</b>  |

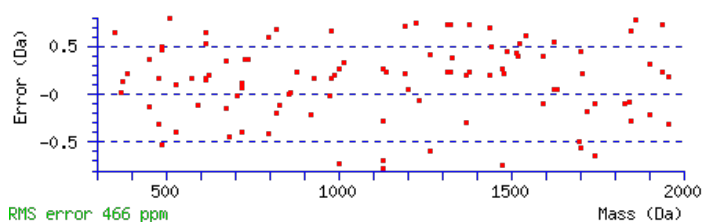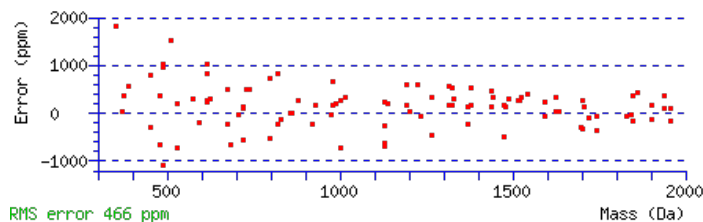

NCBI BLAST search of [MVSHHNLTGATLINEQWLLTTAKNLFNHSENATAK](#)

(Parameters: blastp, nr protein database, expect=20000, no filter, PAM30)

Other BLAST [web gateways](#)

All matches to this query

| Score | Mr(calc)  | Delta  | Sequence                                            | Site Analysis              |
|-------|-----------|--------|-----------------------------------------------------|----------------------------|
| 104.8 | 4120.0687 | 0.0111 | <a href="#">MVSHHNLTGATLINEQWLLTTAKNLFNHSENATAK</a> | Deamidated N29, N33 97.34% |
| 89.0  | 4120.0687 | 0.0111 | <a href="#">MVSHHNLTGATLINEQWLLTTAKNLFNHSENATAK</a> | Deamidated N25, N33 2.57%  |
| 69.8  | 4120.0687 | 0.0111 | <a href="#">MVSHHNLTGATLINEQWLLTTAKNLFNHSENATAK</a> | Deamidated Q17, N33 0.03%  |
| 69.3  | 4120.0687 | 0.0111 | <a href="#">MVSHHNLTGATLINEQWLLTTAKNLFNHSENATAK</a> | Deamidated N25, N29 0.03%  |
| 67.4  | 4120.0687 | 0.0111 | <a href="#">MVSHHNLTGATLINEQWLLTTAKNLFNHSENATAK</a> | Deamidated N15, N33 0.02%  |
| 62.0  | 4119.0847 | 0.9951 | <a href="#">MVSHHNLTGATLINEQWLLTTAKNLFNHSENATAK</a> |                            |
| 61.3  | 4120.0687 | 0.0111 | <a href="#">MVSHHNLTGATLINEQWLLTTAKNLFNHSENATAK</a> | Deamidated Q17, N29 0.00%  |
| 61.1  | 4119.0847 | 0.9951 | <a href="#">MVSHHNLTGATLINEQWLLTTAKNLFNHSENATAK</a> |                            |
| 59.9  | 4119.0847 | 0.9951 | <a href="#">MVSHHNLTGATLINEQWLLTTAKNLFNHSENATAK</a> |                            |
| 58.7  | 4120.0687 | 0.0111 | <a href="#">MVSHHNLTGATLINEQWLLTTAKNLFNHSENATAK</a> | Deamidated N6, N33 0.00%   |

Mascot: <http://www.matrixscience.com/>

# MATRIX SCIENCE Mascot Search Results

## Peptide View

MS/MS Fragmentation of **MVSHHNLTTGATLINEQWLLTTAKNLFNLHSENAK**

Found in **J3QR68** in **con\_Xuniprot\_HUMAN3**, J3QR68\_HUMAN Haptoglobin (Fragment) OS=Homo sapiens GN=HP PE=3 SV=1

Match to Query 28858: 4137.071616 from(1035.275180,4+) intensity(640829.3750) rtinseconds(2553) scans(6409) index(26271)

Title: 111019\_Est\_MI\_YS\_G\_08Spectrum5572\_scans\_6409

Data file C:\mascot\20140703\_Tmgf\_1D\CSV\_UseAnalysis\MasterCSV\All\_Glyco\mgf\ptm\UC18ERLIC\_PTM\_35D.mgf

Click mouse within plot area to zoom in by factor of two about that point

Or, to Da

Label all possible matches Label matches used for scoring

Show Y-axis

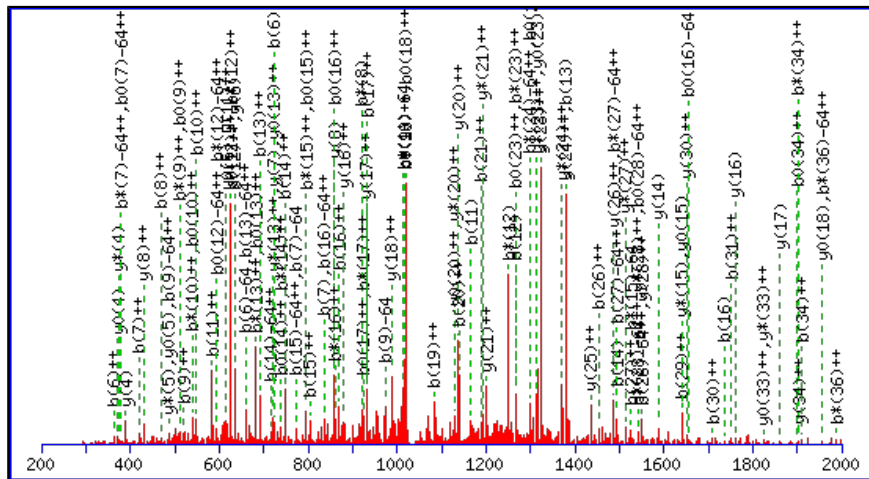

Monoisotopic mass of neutral peptide Mr(calc): 4136.0636

Fixed modifications: Carbamidomethyl (C) (apply to specified residues or termini only)

Variable modifications:

M1 : Oxidation (M), with neutral losses 0.0000 (shown in table), 63.9983

N6 : Deamidated (NQ)

N33 : Deamidated (NQ)

Ions Score: 104 Expect: 7.9e-009

Matches : 119/616 fragment ions using 154 most intense peaks ([help](#))

| #  | b         | b <sup>++</sup> | b <sup>*</sup> | b <sup>*++</sup> | b <sup>0</sup> | b <sup>0++</sup> | Seq. | y         | y <sup>++</sup> | y <sup>*</sup> | y <sup>*++</sup> | y <sup>0</sup> | y <sup>0++</sup> | #  |
|----|-----------|-----------------|----------------|------------------|----------------|------------------|------|-----------|-----------------|----------------|------------------|----------------|------------------|----|
| 1  | 148.0427  | 74.5250         |                |                  |                |                  | M    |           |                 |                |                  |                |                  | 37 |
| 2  | 247.1111  | 124.0592        |                |                  |                |                  | V    | 3990.0356 | 1995.5214       | 3973.0090      | 1987.0081        | 3972.0250      | 1986.5161        | 36 |
| 3  | 334.1431  | 167.5752        |                |                  | 316.1326       | 158.5699         | S    | 3890.9672 | 1945.9872       | 3873.9406      | 1937.4739        | 3872.9566      | 1936.9819        | 35 |
| 4  | 471.2020  | 236.1047        |                |                  | 453.1915       | 227.0994         | H    | 3803.9351 | 1902.4712       | 3786.9086      | 1893.9579        | 3785.9246      | 1893.4659        | 34 |
| 5  | 608.2609  | 304.6341        |                |                  | 590.2504       | 295.6288         | H    | 3666.8762 | 1833.9417       | 3649.8497      | 1825.4285        | 3648.8657      | 1824.9365        | 33 |
| 6  | 723.2879  | 362.1476        | 706.2613       | 353.6343         | 705.2773       | 353.1423         | N    | 3529.8173 | 1765.4123       | 3512.7908      | 1756.8990        | 3511.8067      | 1756.4070        | 32 |
| 7  | 836.3719  | 418.6896        | 819.3454       | 410.1763         | 818.3614       | 409.6843         | L    | 3414.7904 | 1707.8988       | 3397.7638      | 1699.3855        | 3396.7798      | 1698.8935        | 31 |
| 8  | 937.4196  | 469.2135        | 920.3931       | 460.7002         | 919.4091       | 460.2082         | T    | 3301.7063 | 1651.3568       | 3284.6798      | 1642.8435        | 3283.6957      | 1642.3515        | 30 |
| 9  | 1038.4673 | 519.7373        | 1021.4408      | 511.2240         | 1020.4567      | 510.7320         | T    | 3200.6586 | 1600.8329       | 3183.6321      | 1592.3197        | 3182.6481      | 1591.8277        | 29 |
| 10 | 1095.4888 | 548.2480        | 1078.4622      | 539.7347         | 1077.4782      | 539.2427         | G    | 3099.6109 | 1550.3091       | 3082.5844      | 1541.7958        | 3081.6004      | 1541.3038        | 28 |
| 11 | 1166.5259 | 583.7666        | 1149.4993      | 575.2533         | 1148.5153      | 574.7613         | A    | 3042.5895 | 1521.7984       | 3025.5629      | 1513.2851        | 3024.5789      | 1512.7931        | 27 |
| 12 | 1267.5736 | 634.2904        | 1250.5470      | 625.7771         | 1249.5630      | 625.2851         | T    | 2971.5524 | 1486.2798       | 2954.5258      | 1477.7665        | 2953.5418      | 1477.2745        | 26 |
| 13 | 1380.6576 | 690.8325        | 1363.6311      | 682.3192         | 1362.6471      | 681.8272         | L    | 2870.5047 | 1435.7560       | 2853.4781      | 1427.2427        | 2852.4941      | 1426.7507        | 25 |
| 14 | 1493.7417 | 747.3745        | 1476.7151      | 738.8612         | 1475.7311      | 738.3692         | I    | 2757.4206 | 1379.2139       | 2740.3941      | 1370.7007        | 2739.4101      | 1370.2087        | 24 |
| 15 | 1607.7846 | 804.3959        | 1590.7581      | 795.8827         | 1589.7741      | 795.3907         | N    | 2644.3366 | 1322.6719       | 2627.3100      | 1314.1586        | 2626.3260      | 1313.6666        | 23 |
| 16 | 1736.8272 | 868.9172        | 1719.8007      | 860.4040         | 1718.8166      | 859.9120         | E    | 2530.2936 | 1265.6505       | 2513.2671      | 1257.1372        | 2512.2831      | 1256.6452        | 22 |
| 17 | 1864.8858 | 932.9465        | 1847.8592      | 924.4333         | 1846.8752      | 923.9413         | Q    | 2401.2510 | 1201.1292       | 2384.2245      | 1192.6159        | 2383.2405      | 1192.1239        | 21 |
| 18 | 2050.9651 | 1025.9862       | 2033.9386      | 1017.4729        | 2032.9545      | 1016.9809        | W    | 2273.1925 | 1137.0999       | 2256.1659      | 1128.5866        | 2255.1819      | 1128.0946        | 20 |
| 19 | 2164.0492 | 1082.5282       | 2147.0226      | 1074.0149        | 2146.0386      | 1073.5229        | L    | 2087.1131 | 1044.0602       | 2070.0866      | 1035.5469        | 2069.1026      | 1035.0549        | 19 |
| 20 | 2277.1332 | 1139.0703       | 2260.1067      | 1130.5570        | 2259.1227      | 1130.0650        | L    | 1974.0291 | 987.5182        | 1957.0025      | 979.0049         | 1956.0185      | 978.5129         | 18 |
| 21 | 2378.1809 | 1189.5941       | 2361.1544      | 1181.0808        | 2360.1703      | 1180.5888        | T    | 1860.9450 | 930.9761        | 1843.9185      | 922.4629         | 1842.9345      | 921.9709         | 17 |
| 22 | 2479.2286 | 1240.1179       | 2462.2020      | 1231.6047        | 2461.2180      | 1231.1126        | T    | 1759.8973 | 880.4523        | 1742.8708      | 871.9390         | 1741.8868      | 871.4470         | 16 |

|    |           |           |           |           |           |           |   |           |          |           |          |           |          |    |
|----|-----------|-----------|-----------|-----------|-----------|-----------|---|-----------|----------|-----------|----------|-----------|----------|----|
| 23 | 2550.2657 | 1275.6365 | 2533.2392 | 1267.1232 | 2532.2551 | 1266.6312 | A | 1658.8497 | 829.9285 | 1641.8231 | 821.4152 | 1640.8391 | 820.9232 | 15 |
| 24 | 2678.3607 | 1339.6840 | 2661.3341 | 1331.1707 | 2660.3501 | 1330.6787 | K | 1587.8125 | 794.4099 | 1570.7860 | 785.8966 | 1569.8020 | 785.4046 | 14 |
| 25 | 2792.4036 | 1396.7054 | 2775.3770 | 1388.1922 | 2774.3930 | 1387.7002 | N | 1459.7176 | 730.3624 | 1442.6910 | 721.8492 | 1441.7070 | 721.3571 | 13 |
| 26 | 2905.4877 | 1453.2475 | 2888.4611 | 1444.7342 | 2887.4771 | 1444.2422 | L | 1345.6747 | 673.3410 | 1328.6481 | 664.8277 | 1327.6641 | 664.3357 | 12 |
| 27 | 3052.5561 | 1526.7817 | 3035.5295 | 1518.2684 | 3034.5455 | 1517.7764 | F | 1232.5906 | 616.7989 | 1215.5640 | 608.2857 | 1214.5800 | 607.7937 | 11 |
| 28 | 3165.6401 | 1583.3237 | 3148.6136 | 1574.8104 | 3147.6296 | 1574.3184 | L | 1085.5222 | 543.2647 | 1068.4956 | 534.7515 | 1067.5116 | 534.2594 | 10 |
| 29 | 3279.6831 | 1640.3452 | 3262.6565 | 1631.8319 | 3261.6725 | 1631.3399 | N | 972.4381  | 486.7227 | 955.4116  | 478.2094 | 954.4275  | 477.7174 | 9  |
| 30 | 3416.7420 | 1708.8746 | 3399.7154 | 1700.3614 | 3398.7314 | 1699.8693 | H | 858.3952  | 429.7012 | 841.3686  | 421.1880 | 840.3846  | 420.6959 | 8  |
| 31 | 3503.7740 | 1752.3906 | 3486.7475 | 1743.8774 | 3485.7634 | 1743.3854 | S | 721.3363  | 361.1718 | 704.3097  | 352.6585 | 703.3257  | 352.1665 | 7  |
| 32 | 3632.8166 | 1816.9119 | 3615.7900 | 1808.3987 | 3614.8060 | 1807.9067 | E | 634.3042  | 317.6558 | 617.2777  | 309.1425 | 616.2937  | 308.6505 | 6  |
| 33 | 3747.8435 | 1874.4254 | 3730.8170 | 1865.9121 | 3729.8330 | 1865.4201 | N | 505.2617  | 253.1345 | 488.2351  | 244.6212 | 487.2511  | 244.1292 | 5  |
| 34 | 3818.8807 | 1909.9440 | 3801.8541 | 1901.4307 | 3800.8701 | 1900.9387 | A | 390.2347  | 195.6210 | 373.2082  | 187.1077 | 372.2241  | 186.6157 | 4  |
| 35 | 3919.9283 | 1960.4678 | 3902.9018 | 1951.9545 | 3901.9178 | 1951.4625 | T | 319.1976  | 160.1024 | 302.1710  | 151.5892 | 301.1870  | 151.0972 | 3  |
| 36 | 3990.9654 | 1995.9864 | 3973.9389 | 1987.4731 | 3972.9549 | 1986.9811 | A | 218.1499  | 109.5786 | 201.1234  | 101.0653 |           |          | 2  |
| 37 |           |           |           |           |           |           | K | 147.1128  | 74.0600  | 130.0863  | 65.5468  |           |          | 1  |

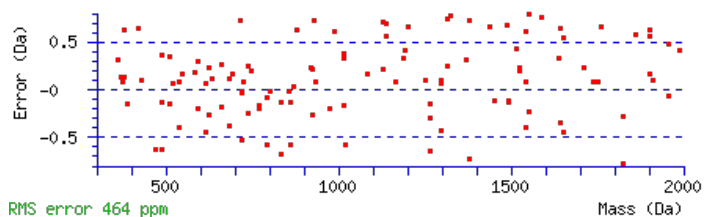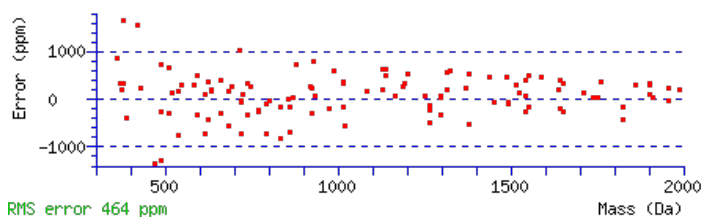

NCBI BLAST search of [MVSHHNLTTGATLINEQWLLTTAKNLFNLHSENATAK](#)

(Parameters: blastp, nr protein database, expect=20000, no filter, PAM30)

Other BLAST [web gateways](#)

All matches to this query

| Score | Mr(calc)  | Delta  | Sequence                                              | Site Analysis             |
|-------|-----------|--------|-------------------------------------------------------|---------------------------|
| 104.0 | 4136.0636 | 1.0080 | <a href="#">MVSHHNLTTGATLINEQWLLTTAKNLFNLHSENATAK</a> | Deamidated N6, N33 94.86% |
| 86.8  | 4136.0636 | 1.0080 | <a href="#">MVSHHNLTTGATLINEQWLLTTAKNLFNLHSENATAK</a> | Deamidated N6, N29 1.84%  |
| 86.8  | 4136.0636 | 1.0080 | <a href="#">MVSHHNLTTGATLINEQWLLTTAKNLFNLHSENATAK</a> | Deamidated N6, N25 1.84%  |
| 83.3  | 4136.0636 | 1.0080 | <a href="#">MVSHHNLTTGATLINEQWLLTTAKNLFNLHSENATAK</a> | Deamidated N6, Q17 0.82%  |
| 80.3  | 4136.0636 | 1.0080 | <a href="#">MVSHHNLTTGATLINEQWLLTTAKNLFNLHSENATAK</a> | Deamidated N6, N15 0.41%  |
| 74.5  | 4136.0636 | 1.0080 | <a href="#">MVSHHNLTTGATLINEQWLLTTAKNLFNLHSENATAK</a> | Deamidated N29, N33 0.11% |
| 70.9  | 4135.0796 | 1.9920 | <a href="#">MVSHHNLTTGATLINEQWLLTTAKNLFNLHSENATAK</a> |                           |
| 70.0  | 4136.0636 | 1.0080 | <a href="#">MVSHHNLTTGATLINEQWLLTTAKNLFNLHSENATAK</a> | Deamidated N25, N33 0.04% |
| 68.2  | 4136.0636 | 1.0080 | <a href="#">MVSHHNLTTGATLINEQWLLTTAKNLFNLHSENATAK</a> | Deamidated N25, N29 0.03% |
| 63.9  | 4136.0636 | 1.0080 | <a href="#">MVSHHNLTTGATLINEQWLLTTAKNLFNLHSENATAK</a> | Deamidated Q17, N33 0.01% |

Mascot: <http://www.matrixscience.com/>



# MATRIX SCIENCE Mascot Search Results

## Peptide View

MS/MS Fragmentation of **MVSHHNLTTGATLINEQWLLTTAKNLFNLHSENAK**

Found in **J3QR68** in **con\_Xuniprot\_HUMAN3**, J3QR68\_HUMAN Haptoglobin (Fragment) OS=Homo sapiens GN=HP PE=3 SV=1

Match to Query 28849: 4137.070616 from(1035.274930,4+) intensity(60315.5469) rtinseconds(2470) scans(6510) index(18908)

Title: 111019\_Est\_MI\_YP\_G\_08Spectrum5683\_scans\_\_6510

Data file C:\mascot\20140703\_Tmgf\_1D\CSV\_UseAnalysis\MasterCSV\All\_Glyco\mgf\ptm\UC18ERLIC\_PTM\_35D.mgf

Click mouse within plot area to zoom in by factor of two about that point

Or, to Da

Label all possible matches Label matches used for scoring

Show Y-axis

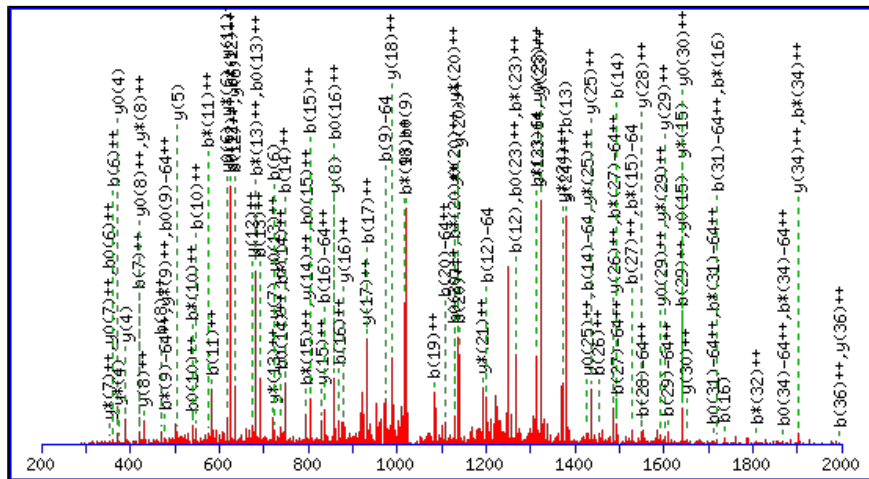

Monoisotopic mass of neutral peptide Mr(calc): 4136.0636

Fixed modifications: Carbamidomethyl (C) (apply to specified residues or termini only)

Variable modifications:

M1 : Oxidation (M), with neutral losses 0.0000 (shown in table), 63.9983

N15 : Deamidated (NQ)

N33 : Deamidated (NQ)

Ions Score: 102 Expect: 1.4e-008

Matches : 110/616 fragment ions using 138 most intense peaks ([help](#))

| #  | b         | b <sup>++</sup> | b <sup>*</sup> | b <sup>*++</sup> | b <sup>0</sup> | b <sup>0++</sup> | Seq. | y         | y <sup>++</sup> | y <sup>*</sup> | y <sup>*++</sup> | y <sup>0</sup> | y <sup>0++</sup> | #  |
|----|-----------|-----------------|----------------|------------------|----------------|------------------|------|-----------|-----------------|----------------|------------------|----------------|------------------|----|
| 1  | 148.0427  | 74.5250         |                |                  |                |                  | M    |           |                 |                |                  |                |                  | 37 |
| 2  | 247.1111  | 124.0592        |                |                  |                |                  | V    | 3990.0356 | 1995.5214       | 3973.0090      | 1987.0082        | 3972.0250      | 1986.5161        | 36 |
| 3  | 334.1431  | 167.5752        |                |                  | 316.1326       | 158.5699         | S    | 3890.9672 | 1945.9872       | 3873.9406      | 1937.4739        | 3872.9566      | 1936.9819        | 35 |
| 4  | 471.2020  | 236.1047        |                |                  | 453.1915       | 227.0994         | H    | 3803.9351 | 1902.4712       | 3786.9086      | 1893.9579        | 3785.9246      | 1893.4659        | 34 |
| 5  | 608.2609  | 304.6341        |                |                  | 590.2504       | 295.6288         | H    | 3666.8762 | 1833.9417       | 3649.8497      | 1825.4285        | 3648.8657      | 1824.9365        | 33 |
| 6  | 722.3039  | 361.6556        | 705.2773       | 353.1423         | 704.2933       | 352.6503         | N    | 3529.8173 | 1765.4123       | 3512.7908      | 1756.8990        | 3511.8067      | 1756.4070        | 32 |
| 7  | 835.3879  | 418.1976        | 818.3614       | 409.6843         | 817.3774       | 409.1923         | L    | 3415.7744 | 1708.3908       | 3398.7478      | 1699.8776        | 3397.7638      | 1699.3855        | 31 |
| 8  | 936.4356  | 468.7214        | 919.4091       | 460.2082         | 918.4250       | 459.7162         | T    | 3302.6903 | 1651.8488       | 3285.6638      | 1643.3355        | 3284.6798      | 1642.8435        | 30 |
| 9  | 1037.4833 | 519.2453        | 1020.4567      | 510.7320         | 1019.4727      | 510.2400         | T    | 3201.6426 | 1601.3250       | 3184.6161      | 1592.8117        | 3183.6321      | 1592.3197        | 29 |
| 10 | 1094.5048 | 547.7560        | 1077.4782      | 539.2427         | 1076.4942      | 538.7507         | G    | 3100.5950 | 1550.8011       | 3083.5684      | 1542.2878        | 3082.5844      | 1541.7958        | 28 |
| 11 | 1165.5419 | 583.2746        | 1148.5153      | 574.7613         | 1147.5313      | 574.2693         | A    | 3043.5735 | 1522.2904       | 3026.5469      | 1513.7771        | 3025.5629      | 1513.2851        | 27 |
| 12 | 1266.5895 | 633.7984        | 1249.5630      | 625.2851         | 1248.5790      | 624.7931         | T    | 2972.5364 | 1486.7718       | 2955.5098      | 1478.2586        | 2954.5258      | 1477.7665        | 26 |
| 13 | 1379.6736 | 690.3404        | 1362.6471      | 681.8272         | 1361.6630      | 681.3352         | L    | 2871.4887 | 1436.2480       | 2854.4622      | 1427.7347        | 2853.4781      | 1427.2427        | 25 |
| 14 | 1492.7577 | 746.8825        | 1475.7311      | 738.3692         | 1474.7471      | 737.8772         | I    | 2758.4046 | 1379.7060       | 2741.3781      | 1371.1927        | 2740.3941      | 1370.7007        | 24 |
| 15 | 1607.7846 | 804.3959        | 1590.7581      | 795.8827         | 1589.7741      | 795.3907         | N    | 2645.3206 | 1323.1639       | 2628.2940      | 1314.6507        | 2627.3100      | 1314.1586        | 23 |
| 16 | 1736.8272 | 868.9172        | 1719.8007      | 860.4040         | 1718.8166      | 859.9120         | E    | 2530.2936 | 1265.6505       | 2513.2671      | 1257.1372        | 2512.2831      | 1256.6452        | 22 |
| 17 | 1864.8858 | 932.9465        | 1847.8592      | 924.4333         | 1846.8752      | 923.9413         | Q    | 2401.2510 | 1201.1292       | 2384.2245      | 1192.6159        | 2383.2405      | 1192.1239        | 21 |
| 18 | 2050.9651 | 1025.9862       | 2033.9386      | 1017.4729        | 2032.9545      | 1016.9809        | W    | 2273.1925 | 1137.0999       | 2256.1659      | 1128.5866        | 2255.1819      | 1128.0946        | 20 |
| 19 | 2164.0492 | 1082.5282       | 2147.0226      | 1074.0149        | 2146.0386      | 1073.5229        | L    | 2087.1131 | 1044.0602       | 2070.0866      | 1035.5469        | 2069.1026      | 1035.0549        | 19 |
| 20 | 2277.1332 | 1139.0703       | 2260.1067      | 1130.5570        | 2259.1227      | 1130.0650        | L    | 1974.0291 | 987.5182        | 1957.0025      | 979.0049         | 1956.0185      | 978.5129         | 18 |
| 21 | 2378.1809 | 1189.5941       | 2361.1544      | 1181.0808        | 2360.1703      | 1180.5888        | T    | 1860.9450 | 930.9761        | 1843.9185      | 922.4629         | 1842.9345      | 921.9709         | 17 |
| 22 | 2479.2286 | 1240.1179       | 2462.2020      | 1231.6047        | 2461.2180      | 1231.1126        | T    | 1759.8973 | 880.4523        | 1742.8708      | 871.9390         | 1741.8868      | 871.4470         | 16 |

|    |           |           |           |           |           |           |   |           |          |           |          |           |          |    |
|----|-----------|-----------|-----------|-----------|-----------|-----------|---|-----------|----------|-----------|----------|-----------|----------|----|
| 23 | 2550.2657 | 1275.6365 | 2533.2392 | 1267.1232 | 2532.2551 | 1266.6312 | A | 1658.8497 | 829.9285 | 1641.8231 | 821.4152 | 1640.8391 | 820.9232 | 15 |
| 24 | 2678.3607 | 1339.6840 | 2661.3341 | 1331.1707 | 2660.3501 | 1330.6787 | K | 1587.8125 | 794.4099 | 1570.7860 | 785.8966 | 1569.8020 | 785.4046 | 14 |
| 25 | 2792.4036 | 1396.7054 | 2775.3770 | 1388.1922 | 2774.3930 | 1387.7002 | N | 1459.7176 | 730.3624 | 1442.6910 | 721.8492 | 1441.7070 | 721.3571 | 13 |
| 26 | 2905.4877 | 1453.2475 | 2888.4611 | 1444.7342 | 2887.4771 | 1444.2422 | L | 1345.6747 | 673.3410 | 1328.6481 | 664.8277 | 1327.6641 | 664.3357 | 12 |
| 27 | 3052.5561 | 1526.7817 | 3035.5295 | 1518.2684 | 3034.5455 | 1517.7764 | F | 1232.5906 | 616.7989 | 1215.5640 | 608.2857 | 1214.5800 | 607.7937 | 11 |
| 28 | 3165.6401 | 1583.3237 | 3148.6136 | 1574.8104 | 3147.6296 | 1574.3184 | L | 1085.5222 | 543.2647 | 1068.4956 | 534.7515 | 1067.5116 | 534.2594 | 10 |
| 29 | 3279.6831 | 1640.3452 | 3262.6565 | 1631.8319 | 3261.6725 | 1631.3399 | N | 972.4381  | 486.7227 | 955.4116  | 478.2094 | 954.4275  | 477.7174 | 9  |
| 30 | 3416.7420 | 1708.8746 | 3399.7154 | 1700.3614 | 3398.7314 | 1699.8693 | H | 858.3952  | 429.7012 | 841.3686  | 421.1880 | 840.3846  | 420.6959 | 8  |
| 31 | 3503.7740 | 1752.3906 | 3486.7475 | 1743.8774 | 3485.7634 | 1743.3854 | S | 721.3363  | 361.1718 | 704.3097  | 352.6585 | 703.3257  | 352.1665 | 7  |
| 32 | 3632.8166 | 1816.9119 | 3615.7900 | 1808.3987 | 3614.8060 | 1807.9067 | E | 634.3042  | 317.6558 | 617.2777  | 309.1425 | 616.2937  | 308.6505 | 6  |
| 33 | 3747.8435 | 1874.4254 | 3730.8170 | 1865.9121 | 3729.8330 | 1865.4201 | N | 505.2617  | 253.1345 | 488.2351  | 244.6212 | 487.2511  | 244.1292 | 5  |
| 34 | 3818.8807 | 1909.9440 | 3801.8541 | 1901.4307 | 3800.8701 | 1900.9387 | A | 390.2347  | 195.6210 | 373.2082  | 187.1077 | 372.2241  | 186.6157 | 4  |
| 35 | 3919.9283 | 1960.4678 | 3902.9018 | 1951.9545 | 3901.9178 | 1951.4625 | T | 319.1976  | 160.1024 | 302.1710  | 151.5892 | 301.1870  | 151.0972 | 3  |
| 36 | 3990.9654 | 1995.9864 | 3973.9389 | 1987.4731 | 3972.9549 | 1986.9811 | A | 218.1499  | 109.5786 | 201.1234  | 101.0653 |           |          | 2  |
| 37 |           |           |           |           |           |           | K | 147.1128  | 74.0600  | 130.0863  | 65.5468  |           |          | 1  |

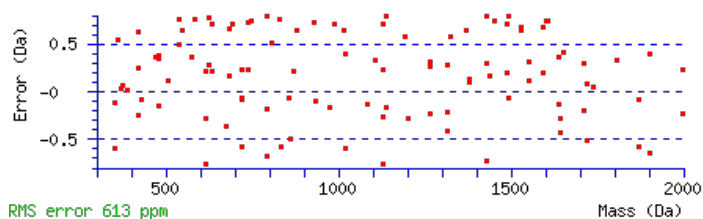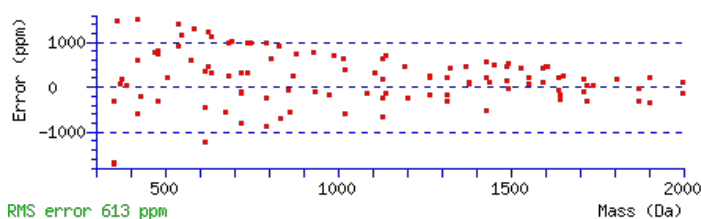

NCBI BLAST search of [MVSHHNLTTGATLINEQWLLTTAKNLFNLHSENATAK](#)

(Parameters: blastp, nr protein database, expect=20000, no filter, PAM30)

Other BLAST [web gateways](#)

All matches to this query

| Score | Mr(calc)  | Delta  | Sequence                                              | Site Analysis              |
|-------|-----------|--------|-------------------------------------------------------|----------------------------|
| 101.6 | 4136.0636 | 1.0070 | <a href="#">MVSHHNLTTGATLINEQWLLTTAKNLFNLHSENATAK</a> | Deamidated N15, N33 32.31% |
| 101.4 | 4136.0636 | 1.0070 | <a href="#">MVSHHNLTTGATLINEQWLLTTAKNLFNLHSENATAK</a> | Deamidated N15, N25 31.43% |
| 98.0  | 4136.0636 | 1.0070 | <a href="#">MVSHHNLTTGATLINEQWLLTTAKNLFNLHSENATAK</a> | Deamidated N6, N33 14.40%  |
| 97.3  | 4136.0636 | 1.0070 | <a href="#">MVSHHNLTTGATLINEQWLLTTAKNLFNLHSENATAK</a> | Deamidated N6, N25 12.14%  |
| 94.2  | 4136.0636 | 1.0070 | <a href="#">MVSHHNLTTGATLINEQWLLTTAKNLFNLHSENATAK</a> | Deamidated N15, N29 5.91%  |
| 90.1  | 4136.0636 | 1.0070 | <a href="#">MVSHHNLTTGATLINEQWLLTTAKNLFNLHSENATAK</a> | Deamidated N6, N29 2.30%   |
| 81.8  | 4136.0636 | 1.0070 | <a href="#">MVSHHNLTTGATLINEQWLLTTAKNLFNLHSENATAK</a> | Deamidated N25, N33 0.34%  |
| 81.6  | 4136.0636 | 1.0070 | <a href="#">MVSHHNLTTGATLINEQWLLTTAKNLFNLHSENATAK</a> | Deamidated Q17, N25 0.32%  |
| 81.0  | 4136.0636 | 1.0070 | <a href="#">MVSHHNLTTGATLINEQWLLTTAKNLFNLHSENATAK</a> | Deamidated Q17, N33 0.28%  |
| 77.0  | 4136.0636 | 1.0070 | <a href="#">MVSHHNLTTGATLINEQWLLTTAKNLFNLHSENATAK</a> | Deamidated N29, N33 0.11%  |

Mascot: <http://www.matrixscience.com/>



# MASCOT SCIENCE Mascot Search Results

## Peptide View

MS/MS Fragmentation of **MVSHHNLTTGATLINEQWLLTTAK**

Found in **J3QR68** in **con\_Xuniprot\_HUMAN3**, J3QR68\_HUMAN Haptoglobin (Fragment) OS=Homo sapiens GN=HP PE=3 SV=1

Match to Query 22556: 2679.370988 from(1340.692770,2+) intensity(34929.4453) rtinseconds(1848) scans(4672) index(25422)

Title: 111019\_Est\_MI\_YS\_G\_07Spectrum3983\_scans\_\_4672

Data file C:\mascot\20140703\_Tmgf\_1D\CSV\_UseAnalysis\MasterCSV\All\_Glyco\mgf\ptm\UC18ERLIC\_PTM\_35D.mgf

Click mouse within plot area to zoom in by factor of two about that point

Or, to Da

Label all possible matches Label matches used for scoring

Show Y-axis

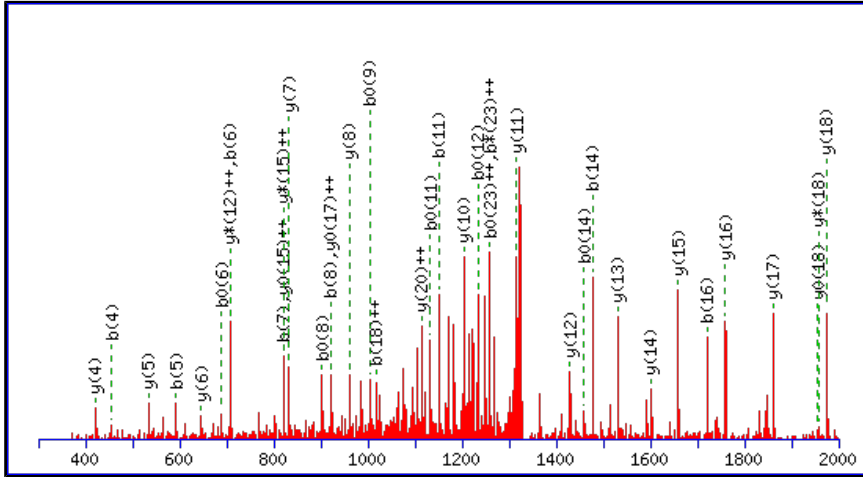

Monoisotopic mass of neutral peptide Mr(calc): 2679.3690

Fixed modifications: Carbamidomethyl (C) (apply to specified residues or termini only)

Variable modifications:

N6 : Deamidated (NQ)

Ions Score: 101 Expect: 1.7e-008

Matches : 38/258 fragment ions using 51 most intense peaks ([help](#))

| #  | b                | b <sup>++</sup>  | b <sup>*</sup> | b <sup>*++</sup> | b <sup>0</sup>   | b <sup>0++</sup> | Seq. | y                | y <sup>++</sup>  | y <sup>*</sup>   | y <sup>*++</sup> | y <sup>0</sup>   | y <sup>0++</sup> | #  |
|----|------------------|------------------|----------------|------------------|------------------|------------------|------|------------------|------------------|------------------|------------------|------------------|------------------|----|
| 1  | 132.0478         | 66.5275          |                |                  |                  |                  | M    |                  |                  |                  |                  |                  |                  | 24 |
| 2  | 231.1162         | 116.0617         |                |                  |                  |                  | V    | 2549.3358        | 1275.1716        | 2532.3093        | 1266.6583        | 2531.3253        | 1266.1663        | 23 |
| 3  | 318.1482         | 159.5777         |                |                  | 300.1376         | 150.5725         | S    | 2450.2674        | 1225.6373        | 2433.2409        | 1217.1241        | 2432.2569        | 1216.6321        | 22 |
| 4  | <b>455.2071</b>  | 228.1072         |                |                  | 437.1966         | 219.1019         | H    | 2363.2354        | 1182.1213        | 2346.2088        | 1173.6081        | 2345.2248        | 1173.1160        | 21 |
| 5  | <b>592.2660</b>  | 296.6367         |                |                  | 574.2555         | 287.6314         | H    | 2226.1765        | <b>1113.5919</b> | 2209.1499        | 1105.0786        | 2208.1659        | 1104.5866        | 20 |
| 6  | <b>707.2930</b>  | 354.1501         | 690.2664       | 345.6368         | <b>689.2824</b>  | 345.1448         | N    | 2089.1176        | 1045.0624        | 2072.0910        | 1036.5491        | 2071.1070        | 1036.0571        | 19 |
| 7  | <b>820.3770</b>  | 410.6922         | 803.3505       | 402.1789         | 802.3665         | 401.6869         | L    | <b>1974.0906</b> | 987.5489         | <b>1957.0641</b> | 979.0357         | <b>1956.0801</b> | 978.5437         | 18 |
| 8  | <b>921.4247</b>  | 461.2160         | 904.3982       | 452.7027         | <b>903.4141</b>  | 452.2107         | T    | <b>1861.0066</b> | 931.0069         | 1843.9800        | 922.4936         | 1842.9960        | <b>922.0016</b>  | 17 |
| 9  | 1022.4724        | 511.7398         | 1005.4458      | 503.2266         | <b>1004.4618</b> | 502.7346         | T    | <b>1759.9589</b> | 880.4831         | 1742.9323        | 871.9698         | 1741.9483        | 871.4778         | 16 |
| 10 | 1079.4939        | 540.2506         | 1062.4673      | 531.7373         | 1061.4833        | 531.2453         | G    | <b>1658.9112</b> | 829.9592         | 1641.8847        | <b>821.4460</b>  | 1640.9006        | <b>820.9540</b>  | 15 |
| 11 | <b>1150.5310</b> | 575.7691         | 1133.5044      | 567.2558         | <b>1132.5204</b> | 566.7638         | A    | <b>1601.8897</b> | 801.4485         | 1584.8632        | 792.9352         | 1583.8792        | 792.4432         | 14 |
| 12 | 1251.5786        | 626.2930         | 1234.5521      | 617.7797         | <b>1233.5681</b> | 617.2877         | T    | <b>1530.8526</b> | 765.9299         | 1513.8261        | 757.4167         | 1512.8421        | 756.9247         | 13 |
| 13 | 1364.6627        | 682.8350         | 1347.6362      | 674.3217         | 1346.6521        | 673.8297         | L    | <b>1429.8049</b> | 715.4061         | 1412.7784        | <b>706.8928</b>  | 1411.7944        | 706.4008         | 12 |
| 14 | <b>1477.7468</b> | 739.3770         | 1460.7202      | 730.8638         | <b>1459.7362</b> | 730.3717         | I    | <b>1316.7209</b> | 658.8641         | 1299.6943        | 650.3508         | 1298.7103        | 649.8588         | 11 |
| 15 | 1591.7897        | 796.3985         | 1574.7632      | 787.8852         | 1573.7791        | 787.3932         | N    | <b>1203.6368</b> | 602.3220         | 1186.6103        | 593.8088         | 1185.6262        | 593.3168         | 10 |
| 16 | <b>1720.8323</b> | 860.9198         | 1703.8057      | 852.4065         | 1702.8217        | 851.9145         | E    | 1089.5939        | 545.3006         | 1072.5673        | 536.7873         | 1071.5833        | 536.2953         | 9  |
| 17 | 1848.8909        | 924.9491         | 1831.8643      | 916.4358         | 1830.8803        | 915.9438         | Q    | <b>960.5513</b>  | 480.7793         | 943.5247         | 472.2660         | 942.5407         | 471.7740         | 8  |
| 18 | 2034.9702        | <b>1017.9887</b> | 2017.9436      | 1009.4755        | 2016.9596        | 1008.9834        | W    | <b>832.4927</b>  | 416.7500         | 815.4662         | 408.2367         | 814.4822         | 407.7447         | 7  |
| 19 | 2148.0543        | 1074.5308        | 2131.0277      | 1066.0175        | 2130.0437        | 1065.5255        | L    | <b>646.4134</b>  | 323.7103         | 629.3869         | 315.1971         | 628.4028         | 314.7051         | 6  |
| 20 | 2261.1383        | 1131.0728        | 2244.1118      | 1122.5595        | 2243.1278        | 1122.0675        | L    | <b>533.3293</b>  | 267.1683         | 516.3028         | 258.6550         | 515.3188         | 258.1630         | 5  |
| 21 | 2362.1860        | 1181.5966        | 2345.1594      | 1173.0834        | 2344.1754        | 1172.5914        | T    | <b>420.2453</b>  | 210.6263         | 403.2187         | 202.1130         | 402.2347         | 201.6210         | 4  |
| 22 | 2463.2337        | 1232.1205        | 2446.2071      | 1223.6072        | 2445.2231        | 1223.1152        | T    | 319.1976         | 160.1024         | 302.1710         | 151.5892         | 301.1870         | 151.0972         | 3  |
| 23 | 2534.2708        | 1267.6390        | 2517.2442      | <b>1259.1258</b> | 2516.2602        | <b>1258.6337</b> | A    | 218.1499         | 109.5786         | 201.1234         | 101.0653         |                  |                  | 2  |

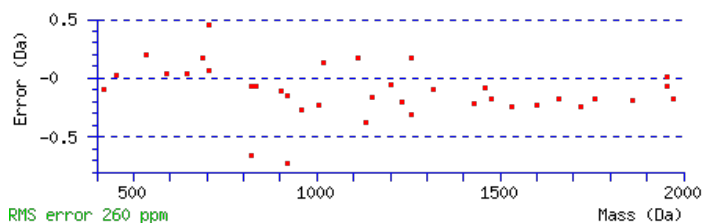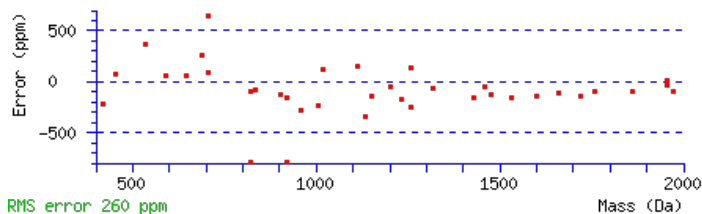

NCBI BLAST search of [MVSHHNLTTGATLINEQWLLTTAK](#)  
 (Parameters: blastp, nr protein database, expect=20000, no filter, PAM30)  
 Other BLAST [web gateways](#)

All matches to this query

| Score | Mr(calc)  | Delta   | Sequence                                 | Site Analysis         |
|-------|-----------|---------|------------------------------------------|-----------------------|
| 101.0 | 2679.3690 | 0.0020  | <a href="#">MVSHHNLTTGATLINEQWLLTTAK</a> | Deamidated N6 100.00% |
| 51.5  | 2679.3690 | 0.0020  | <a href="#">MVSHHNLTTGATLINEQWLLTTAK</a> | Deamidated N15 0.00%  |
| 45.1  | 2679.3690 | 0.0020  | <a href="#">MVSHHNLTTGATLINEQWLLTTAK</a> | Deamidated Q17 0.00%  |
| 4.0   | 2678.3666 | 1.0044  | <a href="#">MLNMIRQISRPSAAGINLMIGSTR</a> |                       |
| 1.1   | 2679.3715 | -0.0005 | <a href="#">AEQHLKTLPETQRLTAQAATQLTE</a> |                       |
| 1.1   | 2679.3715 | -0.0005 | <a href="#">AEQHLKTLPETQRLTAQAATQLTE</a> |                       |
| 1.1   | 2679.3715 | -0.0005 | <a href="#">AEQHLKTLPETQRLTAQAATQLTQ</a> |                       |
| 1.1   | 2679.3715 | -0.0005 | <a href="#">AEQHLKTLPETQRLTAQAATQLTQ</a> |                       |
| 0.6   | 2679.3706 | 0.0004  | <a href="#">KGIGLGFMTAVCVIWFPPSAHK</a>   |                       |

Mascot: <http://www.matrixscience.com/>

# MATRIX SCIENCE Mascot Search Results

## Peptide View

MS/MS Fragmentation of **MVSHHNLTTGATLINEQWLLTTAKNLFNLHSENATAK**

Found in **J3QR68** in **con\_Xuniprot\_HUMAN3**, J3QR68\_HUMAN Haptoglobin (Fragment) OS=Homo sapiens GN=HP PE=3 SV=1

Match to Query 28608: 4122.076376 from(1031.526370,4+) intensity(0.0000) rtinseconds(2542) scans(6789) index(3219)

Title: 111019\_Est\_ISCardio\_NMI\_YP\_G\_5Spectrum5780\_scans\_\_6789

Data file C:\mascot\20140703\_Tmgf\_1D\CSV\_UseAnalysis\MasterCSV\All\_Glyco\mgf\ptm\UC18ERLIC\_PTM\_35D.mgf

Click mouse within plot area to zoom in by factor of two about that point

Or,  to  Da

Label all possible matches  Label matches used for scoring

Show Y-axis

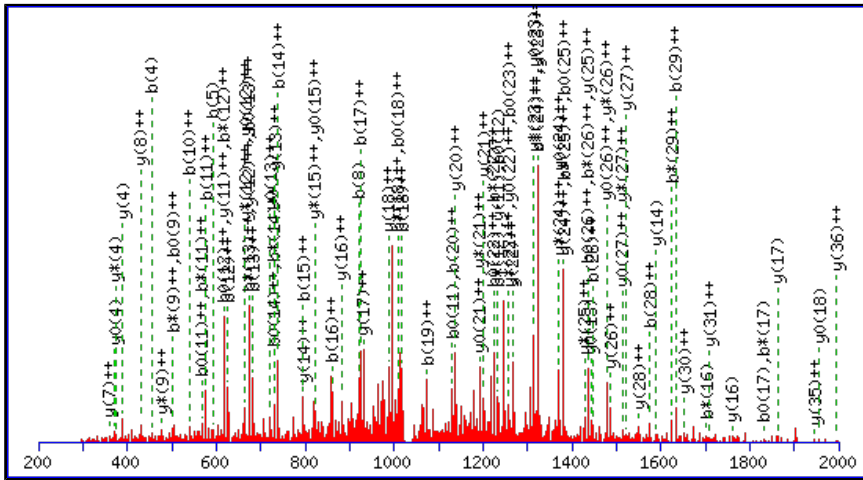

Monoisotopic mass of neutral peptide Mr(calc): 4121.0527

Fixed modifications: Carbamidomethyl (C) (apply to specified residues or termini only)

Variable modifications:

Q17 : Deamidated (NQ)

N25 : Deamidated (NQ)

N29 : Deamidated (NQ)

Ions Score: 100 Expect: 2e-008

Matches : 95/414 fragment ions using 138 most intense peaks ([help](#))

| #  | b         | b <sup>++</sup> | b <sup>*</sup> | b <sup>*++</sup> | b <sup>0</sup> | b <sup>0++</sup> | Seq. | y         | y <sup>++</sup> | y <sup>*</sup> | y <sup>*++</sup> | y <sup>0</sup> | y <sup>0++</sup> | #  |
|----|-----------|-----------------|----------------|------------------|----------------|------------------|------|-----------|-----------------|----------------|------------------|----------------|------------------|----|
| 1  | 132.0478  | 66.5275         |                |                  |                |                  | M    |           |                 |                |                  |                |                  | 37 |
| 2  | 231.1162  | 116.0617        |                |                  |                |                  | V    | 3991.0196 | 1996.0134       | 3973.9930      | 1987.5002        | 3973.0090      | 1987.0081        | 36 |
| 3  | 318.1482  | 159.5777        |                |                  | 300.1376       | 150.5725         | S    | 3891.9512 | 1946.4792       | 3874.9246      | 1937.9660        | 3873.9406      | 1937.4739        | 35 |
| 4  | 455.2071  | 228.1072        |                |                  | 437.1966       | 219.1019         | H    | 3804.9191 | 1902.9632       | 3787.8926      | 1894.4499        | 3786.9086      | 1893.9579        | 34 |
| 5  | 592.2660  | 296.6367        |                |                  | 574.2555       | 287.6314         | H    | 3667.8602 | 1834.4338       | 3650.8337      | 1825.9205        | 3649.8497      | 1825.4285        | 33 |
| 6  | 706.3090  | 353.6581        | 689.2824       | 345.1448         | 688.2984       | 344.6528         | N    | 3530.8013 | 1765.9043       | 3513.7748      | 1757.3910        | 3512.7908      | 1756.8990        | 32 |
| 7  | 819.3930  | 410.2001        | 802.3665       | 401.6869         | 801.3825       | 401.1949         | L    | 3416.7584 | 1708.8828       | 3399.7318      | 1700.3696        | 3398.7478      | 1699.8776        | 31 |
| 8  | 920.4407  | 460.7240        | 903.4141       | 452.2107         | 902.4301       | 451.7187         | T    | 3303.6743 | 1652.3408       | 3286.6478      | 1643.8275        | 3285.6638      | 1643.3355        | 30 |
| 9  | 1021.4884 | 511.2478        | 1004.4618      | 502.7346         | 1003.4778      | 502.2425         | T    | 3202.6267 | 1601.8170       | 3185.6001      | 1593.3037        | 3184.6161      | 1592.8117        | 29 |
| 10 | 1078.5098 | 539.7586        | 1061.4833      | 531.2453         | 1060.4993      | 530.7533         | G    | 3101.5790 | 1551.2931       | 3084.5524      | 1542.7799        | 3083.5684      | 1542.2878        | 28 |
| 11 | 1149.5470 | 575.2771        | 1132.5204      | 566.7638         | 1131.5364      | 566.2718         | A    | 3044.5575 | 1522.7824       | 3027.5310      | 1514.2691        | 3026.5469      | 1513.7771        | 27 |
| 12 | 1250.5946 | 625.8010        | 1233.5681      | 617.2877         | 1232.5841      | 616.7957         | T    | 2973.5204 | 1487.2638       | 2956.4938      | 1478.7506        | 2955.5098      | 1478.2586        | 26 |
| 13 | 1363.6787 | 682.3430        | 1346.6521      | 673.8297         | 1345.6681      | 673.3377         | L    | 2872.4727 | 1436.7400       | 2855.4462      | 1428.2267        | 2854.4622      | 1427.7347        | 25 |
| 14 | 1476.7628 | 738.8850        | 1459.7362      | 730.3717         | 1458.7522      | 729.8797         | I    | 2759.3887 | 1380.1980       | 2742.3621      | 1371.6847        | 2741.3781      | 1371.1927        | 24 |
| 15 | 1590.8057 | 795.9065        | 1573.7791      | 787.3932         | 1572.7951      | 786.9012         | N    | 2646.3046 | 1323.6559       | 2629.2780      | 1315.1427        | 2628.2940      | 1314.6506        | 23 |
| 16 | 1719.8483 | 860.4278        | 1702.8217      | 851.9145         | 1701.8377      | 851.4225         | E    | 2532.2617 | 1266.6345       | 2515.2351      | 1258.1212        | 2514.2511      | 1257.6292        | 22 |
| 17 | 1848.8909 | 924.9491        | 1831.8643      | 916.4358         | 1830.8803      | 915.9438         | Q    | 2403.2191 | 1202.1132       | 2386.1925      | 1193.5999        | 2385.2085      | 1193.1079        | 21 |
| 18 | 2034.9702 | 1017.9887       | 2017.9436      | 1009.4755        | 2016.9596      | 1008.9834        | W    | 2274.1765 | 1137.5919       | 2257.1499      | 1129.0786        | 2256.1659      | 1128.5866        | 20 |
| 19 | 2148.0543 | 1074.5308       | 2131.0277      | 1066.0175        | 2130.0437      | 1065.5255        | L    | 2088.0972 | 1044.5522       | 2071.0706      | 1036.0389        | 2070.0866      | 1035.5469        | 19 |
| 20 | 2261.1383 | 1131.0728       | 2244.1118      | 1122.5595        | 2243.1278      | 1122.0675        | L    | 1975.0131 | 988.0102        | 1957.9865      | 979.4969         | 1957.0025      | 979.0049         | 18 |
| 21 | 2362.1860 | 1181.5966       | 2345.1594      | 1173.0834        | 2344.1754      | 1172.5914        | T    | 1861.9290 | 931.4682        | 1844.9025      | 922.9549         | 1843.9185      | 922.4629         | 17 |
| 22 | 2463.2337 | 1232.1205       | 2446.2071      | 1223.6072        | 2445.2231      | 1223.1152        | T    | 1760.8814 | 880.9443        | 1743.8548      | 872.4310         | 1742.8708      | 871.9390         | 16 |

|    |           |           |           |           |           |           |   |           |          |           |          |           |          |    |
|----|-----------|-----------|-----------|-----------|-----------|-----------|---|-----------|----------|-----------|----------|-----------|----------|----|
| 23 | 2534.2708 | 1267.6390 | 2517.2442 | 1259.1258 | 2516.2602 | 1258.6337 | A | 1659.8337 | 830.4205 | 1642.8071 | 821.9072 | 1641.8231 | 821.4152 | 15 |
| 24 | 2662.3658 | 1331.6865 | 2645.3392 | 1323.1732 | 2644.3552 | 1322.6812 | K | 1588.7966 | 794.9019 | 1571.7700 | 786.3886 | 1570.7860 | 785.8966 | 14 |
| 25 | 2777.3927 | 1389.2000 | 2760.3661 | 1380.6867 | 2759.3821 | 1380.1947 | N | 1460.7016 | 730.8544 | 1443.6751 | 722.3412 | 1442.6910 | 721.8492 | 13 |
| 26 | 2890.4768 | 1445.7420 | 2873.4502 | 1437.2287 | 2872.4662 | 1436.7367 | L | 1345.6747 | 673.3410 | 1328.6481 | 664.8277 | 1327.6641 | 664.3357 | 12 |
| 27 | 3037.5452 | 1519.2762 | 3020.5186 | 1510.7629 | 3019.5346 | 1510.2709 | F | 1232.5906 | 616.7989 | 1215.5640 | 608.2857 | 1214.5800 | 607.7937 | 11 |
| 28 | 3150.6292 | 1575.8183 | 3133.6027 | 1567.3050 | 3132.6187 | 1566.8130 | L | 1085.5222 | 543.2647 | 1068.4956 | 534.7515 | 1067.5116 | 534.2594 | 10 |
| 29 | 3265.6562 | 1633.3317 | 3248.6296 | 1624.8185 | 3247.6456 | 1624.3264 | N | 972.4381  | 486.7227 | 955.4116  | 478.2094 | 954.4275  | 477.7174 | 9  |
| 30 | 3402.7151 | 1701.8612 | 3385.6885 | 1693.3479 | 3384.7045 | 1692.8559 | H | 857.4112  | 429.2092 | 840.3846  | 420.6959 | 839.4006  | 420.2039 | 8  |
| 31 | 3489.7471 | 1745.3772 | 3472.7206 | 1736.8639 | 3471.7366 | 1736.3719 | S | 720.3523  | 360.6798 | 703.3257  | 352.1665 | 702.3417  | 351.6745 | 7  |
| 32 | 3618.7897 | 1809.8985 | 3601.7632 | 1801.3852 | 3600.7791 | 1800.8932 | E | 633.3202  | 317.1638 | 616.2937  | 308.6505 | 615.3097  | 308.1585 | 6  |
| 33 | 3732.8326 | 1866.9200 | 3715.8061 | 1858.4067 | 3714.8221 | 1857.9147 | N | 504.2776  | 252.6425 | 487.2511  | 244.1292 | 486.2671  | 243.6372 | 5  |
| 34 | 3803.8698 | 1902.4385 | 3786.8432 | 1893.9252 | 3785.8592 | 1893.4332 | A | 390.2347  | 195.6210 | 373.2082  | 187.1077 | 372.2241  | 186.6157 | 4  |
| 35 | 3904.9174 | 1952.9624 | 3887.8909 | 1944.4491 | 3886.9069 | 1943.9571 | T | 319.1976  | 160.1024 | 302.1710  | 151.5892 | 301.1870  | 151.0972 | 3  |
| 36 | 3975.9545 | 1988.4809 | 3958.9280 | 1979.9676 | 3957.9440 | 1979.4756 | A | 218.1499  | 109.5786 | 201.1234  | 101.0653 |           |          | 2  |
| 37 |           |           |           |           |           |           | K | 147.1128  | 74.0600  | 130.0863  | 65.5468  |           |          | 1  |

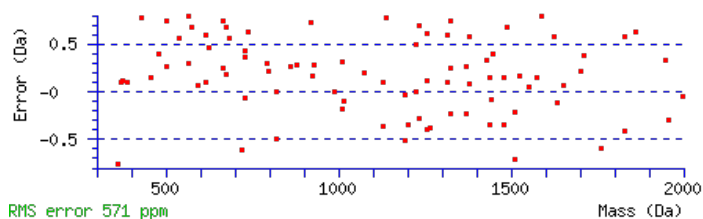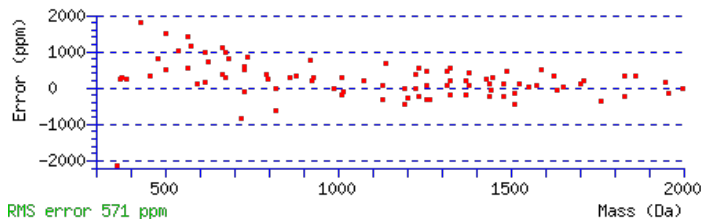

NCBI BLAST search of [MVSHHNLTTGATLINEQWLLTTAKNLFNLHSENATAK](#)

(Parameters: blastp, nr protein database, expect=20000, no filter, PAM30)

Other BLAST [web gateways](#)

All matches to this query

| Score | Mr(calc)  | Delta  | Sequence                                              | Site Analysis                   |
|-------|-----------|--------|-------------------------------------------------------|---------------------------------|
| 99.5  | 4121.0527 | 1.0236 | <a href="#">MVSHHNLTTGATLINEQWLLTTAKNLFNLHSENATAK</a> | Deamidated Q17, N25, N29 58.30% |
| 96.3  | 4121.0527 | 1.0236 | <a href="#">MVSHHNLTTGATLINEQWLLTTAKNLFNLHSENATAK</a> | Deamidated N6, N29, N33 27.97%  |
| 92.3  | 4121.0527 | 1.0236 | <a href="#">MVSHHNLTTGATLINEQWLLTTAKNLFNLHSENATAK</a> | Deamidated N6, N15, N33 10.91%  |
| 85.8  | 4121.0527 | 1.0236 | <a href="#">MVSHHNLTTGATLINEQWLLTTAKNLFNLHSENATAK</a> | Deamidated N25, N29, N33 2.48%  |
| 84.2  | 4120.0687 | 2.0076 | <a href="#">MVSHHNLTTGATLINEQWLLTTAKNLFNLHSENATAK</a> |                                 |
| 76.5  | 4120.0687 | 2.0076 | <a href="#">MVSHHNLTTGATLINEQWLLTTAKNLFNLHSENATAK</a> |                                 |
| 71.3  | 4121.0527 | 1.0236 | <a href="#">MVSHHNLTTGATLINEQWLLTTAKNLFNLHSENATAK</a> | Deamidated N15, Q17, N25 0.09%  |
| 69.3  | 4120.0687 | 2.0076 | <a href="#">MVSHHNLTTGATLINEQWLLTTAKNLFNLHSENATAK</a> |                                 |
| 65.1  | 4120.0687 | 2.0076 | <a href="#">MVSHHNLTTGATLINEQWLLTTAKNLFNLHSENATAK</a> |                                 |
| 65.1  | 4120.0687 | 2.0076 | <a href="#">MVSHHNLTTGATLINEQWLLTTAKNLFNLHSENATAK</a> |                                 |

Mascot: <http://www.matrixscience.com/>

# MATRIX SCIENCE Mascot Search Results

## Peptide View

MS/MS Fragmentation of **MVSHHNLTTGATLINEQWLLTTAKNLFNLHSEENATAK**

Found in **J3QR68** in **con\_Xuniprot\_HUMAN3**, J3QR68\_HUMAN Haptoglobin (Fragment) OS=Homo sapiens GN=HP PE=3 SV=1

Match to Query 28525: 4121.076016 from(1031.276280,4+) intensity(395226.6875) rtinseconds(2426) scans(6193) index(12862)

Title: 111019\_Est\_ISCardio\_NMI\_YS\_G\_9Spectrum5442\_scans\_\_6193

Data file C:\mascot\20140703\_Tmgf\_1D\CSV\_UseAnalysis\MasterCSV\All\_Glyco\mgf\ptm\UC18ERLIC\_PTM\_35D.mgf

Click mouse within plot area to zoom in by factor of two about that point

Or, to Da

Label all possible matches Label matches used for scoring

Show Y-axis

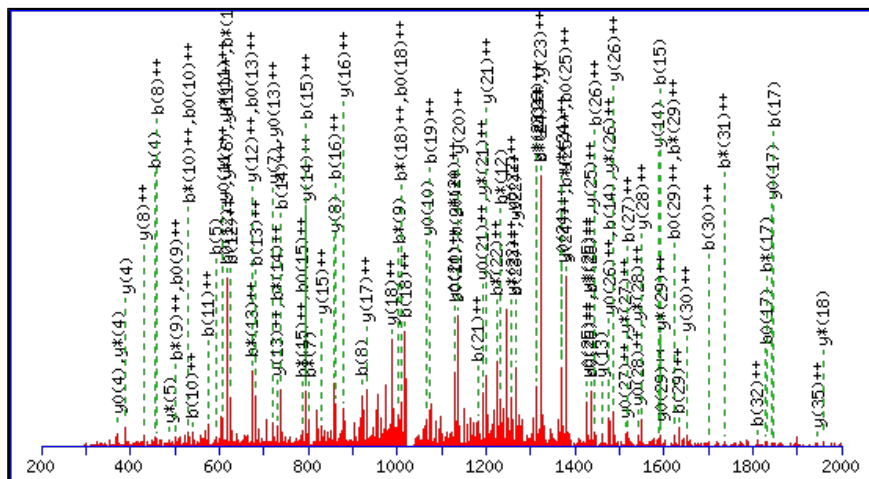

Monoisotopic mass of neutral peptide Mr(calc): 4120.0687

Fixed modifications: Carbamidomethyl (C) (apply to specified residues or termini only)

Variable modifications:

N25 : Deamidated (NQ)

N33 : Deamidated (NQ)

Ions Score: 99 Expect: 2.4e-008

Matches : 106/414 fragment ions using 153 most intense peaks ([help](#))

| #  | b                | b <sup>++</sup>  | b <sup>*</sup>   | b <sup>*++</sup> | b <sup>0</sup>   | b <sup>0++</sup> | Seq.     | y         | y <sup>++</sup>  | y <sup>*</sup>   | y <sup>*++</sup> | y <sup>0</sup>   | y <sup>0++</sup> | #  |
|----|------------------|------------------|------------------|------------------|------------------|------------------|----------|-----------|------------------|------------------|------------------|------------------|------------------|----|
| 1  | 132.0478         | 66.5275          |                  |                  |                  |                  | <b>M</b> |           |                  |                  |                  |                  |                  | 37 |
| 2  | 231.1162         | 116.0617         |                  |                  |                  |                  | <b>V</b> | 3990.0356 | 1995.5214        | 3973.0090        | 1987.0081        | 3972.0250        | 1986.5161        | 36 |
| 3  | 318.1482         | 159.5777         |                  |                  | 300.1376         | 150.5725         | <b>S</b> | 3890.9672 | <b>1945.9872</b> | 3873.9406        | 1937.4739        | 3872.9566        | 1936.9819        | 35 |
| 4  | <b>455.2071</b>  | 228.1072         |                  |                  | 437.1966         | 219.1019         | <b>H</b> | 3803.9351 | 1902.4712        | 3786.9086        | 1893.9579        | 3785.9246        | 1893.4659        | 34 |
| 5  | <b>592.2660</b>  | 296.6367         |                  |                  | 574.2555         | 287.6314         | <b>H</b> | 3666.8762 | 1833.9417        | 3649.8497        | 1825.4285        | 3648.8657        | 1824.9365        | 33 |
| 6  | 706.3090         | 353.6581         | 689.2824         | 345.1448         | 688.2984         | 344.6528         | <b>N</b> | 3529.8173 | 1765.4123        | 3512.7908        | 1756.8990        | 3511.8067        | 1756.4070        | 32 |
| 7  | 819.3930         | 410.2001         | <b>802.3665</b>  | 401.6869         | 801.3825         | 401.1949         | <b>L</b> | 3415.7744 | 1708.3908        | 3398.7478        | 1699.8776        | 3397.7638        | 1699.3855        | 31 |
| 8  | <b>920.4407</b>  | <b>460.7240</b>  | 903.4141         | 452.2107         | 902.4301         | 451.7187         | <b>T</b> | 3302.6903 | <b>1651.8488</b> | 3285.6638        | 1643.3355        | 3284.6798        | 1642.8435        | 30 |
| 9  | 1021.4884        | 511.2478         | <b>1004.4618</b> | <b>502.7346</b>  | 1003.4778        | <b>502.2425</b>  | <b>T</b> | 3201.6426 | 1601.3250        | 3184.6161        | <b>1592.8117</b> | 3183.6321        | <b>1592.3197</b> | 29 |
| 10 | 1078.5098        | <b>539.7586</b>  | 1061.4833        | <b>531.2453</b>  | 1060.4993        | <b>530.7533</b>  | <b>G</b> | 3100.5950 | <b>1550.8011</b> | 3083.5684        | <b>1542.2878</b> | 3082.5844        | <b>1541.7958</b> | 28 |
| 11 | 1149.5470        | <b>575.2771</b>  | 1132.5204        | 566.7638         | <b>1131.5364</b> | 566.2718         | <b>A</b> | 3043.5735 | 1522.2904        | 3026.5469        | <b>1513.7771</b> | 3025.5629        | <b>1513.2851</b> | 27 |
| 12 | 1250.5946        | <b>625.8010</b>  | <b>1233.5681</b> | <b>617.2877</b>  | 1232.5841        | <b>616.7957</b>  | <b>T</b> | 2972.5364 | <b>1486.7718</b> | 2955.5098        | <b>1478.2586</b> | 2954.5258        | <b>1477.7665</b> | 26 |
| 13 | 1363.6787        | <b>682.3430</b>  | 1346.6521        | <b>673.8297</b>  | 1345.6681        | <b>673.3377</b>  | <b>L</b> | 2871.4887 | <b>1436.2480</b> | 2854.4622        | <b>1427.7347</b> | 2853.4781        | <b>1427.2427</b> | 25 |
| 14 | <b>1476.7628</b> | <b>738.8850</b>  | 1459.7362        | <b>730.3717</b>  | 1458.7522        | 729.8797         | <b>I</b> | 2758.4046 | <b>1379.7060</b> | 2741.3781        | <b>1371.1927</b> | 2740.3941        | <b>1370.7007</b> | 24 |
| 15 | <b>1590.8057</b> | <b>795.9065</b>  | 1573.7791        | <b>787.3932</b>  | 1572.7951        | <b>786.9012</b>  | <b>N</b> | 2645.3206 | <b>1323.1639</b> | 2628.2940        | <b>1314.6506</b> | 2627.3100        | <b>1314.1586</b> | 23 |
| 16 | 1719.8483        | <b>860.4278</b>  | 1702.8217        | 851.9145         | 1701.8377        | 851.4225         | <b>E</b> | 2531.2776 | <b>1266.1425</b> | 2514.2511        | <b>1257.6292</b> | 2513.2671        | <b>1257.1372</b> | 22 |
| 17 | <b>1847.9069</b> | 924.4571         | <b>1830.8803</b> | 915.9438         | <b>1829.8963</b> | 915.4518         | <b>Q</b> | 2402.2351 | <b>1201.6212</b> | 2385.2085        | <b>1193.1079</b> | 2384.2245        | <b>1192.6159</b> | 21 |
| 18 | 2033.9862        | <b>1017.4967</b> | 2016.9596        | <b>1008.9834</b> | 2015.9756        | <b>1008.4914</b> | <b>W</b> | 2274.1765 | <b>1137.5919</b> | 2257.1499        | <b>1129.0786</b> | 2256.1659        | <b>1128.5866</b> | 20 |
| 19 | 2147.0702        | <b>1074.0388</b> | 2130.0437        | 1065.5255        | 2129.0597        | 1065.0335        | <b>L</b> | 2088.0972 | 1044.5522        | 2071.0706        | 1036.0389        | 2070.0866        | 1035.5469        | 19 |
| 20 | 2260.1543        | <b>1130.5808</b> | 2243.1278        | 1122.0675        | 2242.1437        | 1121.5755        | <b>L</b> | 1975.0131 | <b>988.0102</b>  | <b>1957.9865</b> | 979.4969         | 1957.0025        | 979.0049         | 18 |
| 21 | 2361.2020        | <b>1181.1046</b> | 2344.1754        | 1172.5914        | 2343.1914        | 1172.0993        | <b>T</b> | 1861.9290 | <b>931.4682</b>  | 1844.9025        | 922.9549         | <b>1843.9185</b> | 922.4629         | 17 |
| 22 | 2462.2497        | 1231.6285        | 2445.2231        | <b>1223.1152</b> | 2444.2391        | 1222.6232        | <b>T</b> | 1760.8814 | <b>880.9443</b>  | 1743.8548        | 872.4310         | 1742.8708        | 871.9390         | 16 |

|    |           |                  |           |                  |           |                  |   |                  |                 |                 |                 |                  |                 |           |
|----|-----------|------------------|-----------|------------------|-----------|------------------|---|------------------|-----------------|-----------------|-----------------|------------------|-----------------|-----------|
| 23 | 2533.2868 | <b>1267.1470</b> | 2516.2602 | 1258.6337        | 2515.2762 | 1258.1417        | A | 1659.8337        | <b>830.4205</b> | 1642.8071       | 821.9072        | 1641.8231        | 821.4152        | <b>15</b> |
| 24 | 2661.3817 | 1331.1945        | 2644.3552 | <b>1322.6812</b> | 2643.3712 | 1322.1892        | K | <b>1588.7966</b> | <b>794.9019</b> | 1571.7700       | 786.3886        | 1570.7860        | 785.8966        | <b>14</b> |
| 25 | 2776.4087 | 1388.7080        | 2759.3821 | <b>1380.1947</b> | 2758.3981 | <b>1379.7027</b> | N | <b>1460.7016</b> | <b>730.8544</b> | 1443.6751       | 722.3412        | 1442.6910        | <b>721.8492</b> | <b>13</b> |
| 26 | 2889.4927 | <b>1445.2500</b> | 2872.4662 | <b>1436.7367</b> | 2871.4822 | <b>1436.2447</b> | L | 1345.6747        | <b>673.3410</b> | 1328.6481       | 664.8277        | 1327.6641        | 664.3357        | <b>12</b> |
| 27 | 3036.5612 | <b>1518.7842</b> | 3019.5346 | 1510.2709        | 3018.5506 | 1509.7789        | F | 1232.5906        | <b>616.7989</b> | 1215.5640       | <b>608.2857</b> | 1214.5800        | <b>607.7937</b> | <b>11</b> |
| 28 | 3149.6452 | 1575.3262        | 3132.6187 | 1566.8130        | 3131.6347 | 1566.3210        | L | 1085.5222        | 543.2647        | 1068.4956       | 534.7515        | <b>1067.5116</b> | 534.2594        | <b>10</b> |
| 29 | 3263.6881 | <b>1632.3477</b> | 3246.6616 | <b>1623.8344</b> | 3245.6776 | <b>1623.3424</b> | N | 972.4381         | 486.7227        | 955.4116        | 478.2094        | 954.4275         | 477.7174        | <b>9</b>  |
| 30 | 3400.7471 | <b>1700.8772</b> | 3383.7205 | 1692.3639        | 3382.7365 | 1691.8719        | H | <b>858.3952</b>  | <b>429.7012</b> | 841.3686        | 421.1880        | 840.3846         | 420.6959        | <b>8</b>  |
| 31 | 3487.7791 | 1744.3932        | 3470.7525 | <b>1735.8799</b> | 3469.7685 | 1735.3879        | S | <b>721.3363</b>  | 361.1718        | 704.3097        | 352.6585        | 703.3257         | 352.1665        | <b>7</b>  |
| 32 | 3616.8217 | <b>1808.9145</b> | 3599.7951 | 1800.4012        | 3598.8111 | 1799.9092        | E | 634.3042         | 317.6558        | <b>617.2777</b> | 309.1425        | 616.2937         | 308.6505        | <b>6</b>  |
| 33 | 3731.8486 | 1866.4279        | 3714.8221 | 1857.9147        | 3713.8381 | 1857.4227        | N | 505.2617         | 253.1345        | <b>488.2351</b> | 244.6212        | 487.2511         | 244.1292        | <b>5</b>  |
| 34 | 3802.8857 | 1901.9465        | 3785.8592 | 1893.4332        | 3784.8752 | 1892.9412        | A | <b>390.2347</b>  | 195.6210        | <b>373.2082</b> | 187.1077        | <b>372.2241</b>  | 186.6157        | <b>4</b>  |
| 35 | 3903.9334 | 1952.4703        | 3886.9069 | 1943.9571        | 3885.9229 | 1943.4651        | T | 319.1976         | 160.1024        | 302.1710        | 151.5892        | 301.1870         | 151.0972        | <b>3</b>  |
| 36 | 3974.9705 | 1987.9889        | 3957.9440 | 1979.4756        | 3956.9600 | 1978.9836        | A | 218.1499         | 109.5786        | 201.1234        | 101.0653        |                  |                 | <b>2</b>  |
| 37 |           |                  |           |                  |           |                  | K | 147.1128         | 74.0600         | 130.0863        | 65.5468         |                  |                 | <b>1</b>  |

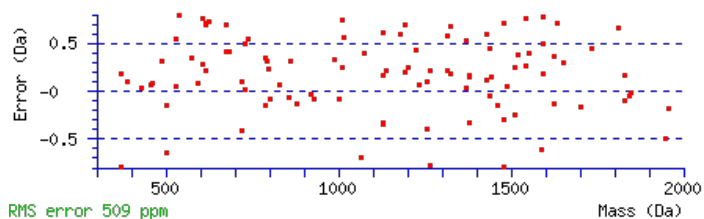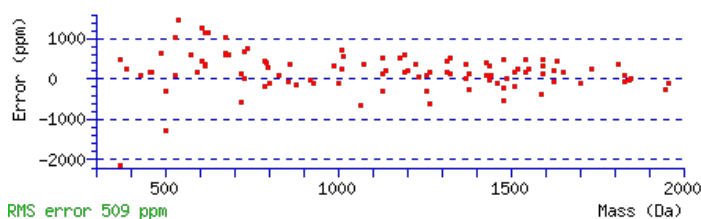

NCBI BLAST search of [MVSHHNLTTGATLINEQWLLTTAKNLFNLHSENATAK](#)

(Parameters: blastp, nr protein database, expect=20000, no filter, PAM30)

Other BLAST [web gateways](#)

All matches to this query

| Score | Mr(calc)  | Delta  | Sequence                                              | Site Analysis              |
|-------|-----------|--------|-------------------------------------------------------|----------------------------|
| 98.6  | 4120.0687 | 1.0073 | <a href="#">MVSHHNLTTGATLINEQWLLTTAKNLFNLHSENATAK</a> | Deamidated N25, N33 72.33% |
| 94.1  | 4120.0687 | 1.0073 | <a href="#">MVSHHNLTTGATLINEQWLLTTAKNLFNLHSENATAK</a> | Deamidated N29, N33 25.66% |
| 77.3  | 4120.0687 | 1.0073 | <a href="#">MVSHHNLTTGATLINEQWLLTTAKNLFNLHSENATAK</a> | Deamidated N6, N33 0.53%   |
| 76.6  | 4120.0687 | 1.0073 | <a href="#">MVSHHNLTTGATLINEQWLLTTAKNLFNLHSENATAK</a> | Deamidated N6, N29 0.46%   |
| 75.7  | 4120.0687 | 1.0073 | <a href="#">MVSHHNLTTGATLINEQWLLTTAKNLFNLHSENATAK</a> | Deamidated N25, N29 0.37%  |
| 71.8  | 4120.0687 | 1.0073 | <a href="#">MVSHHNLTTGATLINEQWLLTTAKNLFNLHSENATAK</a> | Deamidated N15, N33 0.15%  |
| 70.6  | 4120.0687 | 1.0073 | <a href="#">MVSHHNLTTGATLINEQWLLTTAKNLFNLHSENATAK</a> | Deamidated N15, N29 0.11%  |
| 70.1  | 4120.0687 | 1.0073 | <a href="#">MVSHHNLTTGATLINEQWLLTTAKNLFNLHSENATAK</a> | Deamidated N6, N25 0.10%   |
| 66.8  | 4120.0687 | 1.0073 | <a href="#">MVSHHNLTTGATLINEQWLLTTAKNLFNLHSENATAK</a> | Deamidated Q17, N33 0.05%  |
| 66.7  | 4120.0687 | 1.0073 | <a href="#">MVSHHNLTTGATLINEQWLLTTAKNLFNLHSENATAK</a> | Deamidated N6, Q17 0.05%   |

Mascot: <http://www.matrixscience.com/>



# MASCOT SCIENCE Mascot Search Results

## Peptide View

MS/MS Fragmentation of **MVSHHNLTTGATLINEQWLLTTAKNLFNLHSENAK**

Found in **J3QR68** in **con\_Xuniprot\_HUMAN3**, J3QR68\_HUMAN Haptoglobin (Fragment) OS=Homo sapiens GN=HP PE=3 SV=1

Match to Query 28841: 4137.068696 from(1035.274450,4+) intensity(10372.8145) rtinseconds(2630) scans(6625) index(26288)

Title: 111019\_Est\_MI\_YS\_G\_08Spectrum5762\_scans\_\_6625

Data file C:\mascot\20140703\_Tmgf\_1D\CSV\_UseAnalysis\MasterCSV\All\_Glyco\mgf\ptm\UC18ERLIC\_PTM\_35D.mgf

Click mouse within plot area to zoom in by factor of two about that point

Or, to Da

Label all possible matches Label matches used for scoring

Show Y-axis

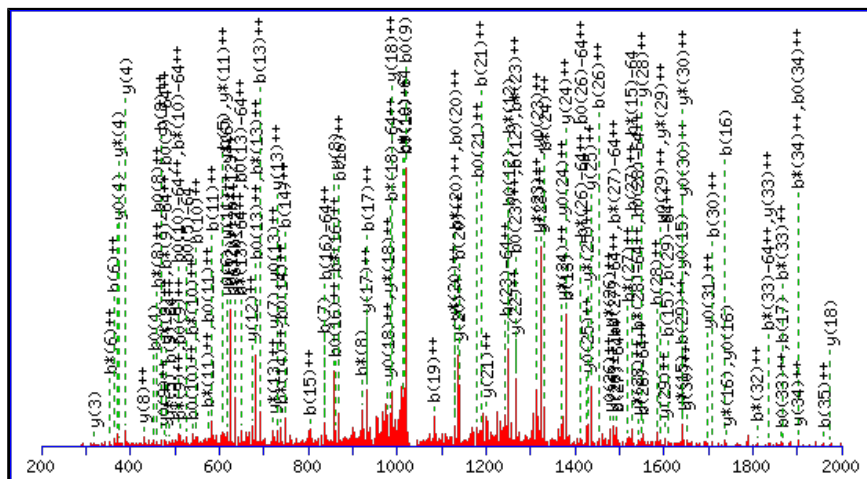

Monoisotopic mass of neutral peptide Mr(calc): 4137.0477

Fixed modifications: Carbamidomethyl (C) (apply to specified residues or termini only)

Variable modifications:

M1 : Oxidation (M), with neutral losses 0.0000(shown in table), 63.9983

N6 : Deamidated (NQ)

N15 : Deamidated (NQ)

N33 : Deamidated (NQ)

Ions Score: 98 Expect: 3.2e-008

Matches : 140/616 fragment ions using 172 most intense peaks (help)

| #  | b         | b <sup>++</sup> | b <sup>*</sup> | b <sup>*++</sup> | b <sup>0</sup> | b <sup>0++</sup> | Seq. | y         | y <sup>++</sup> | y <sup>*</sup> | y <sup>*++</sup> | y <sup>0</sup> | y <sup>0++</sup> | #  |
|----|-----------|-----------------|----------------|------------------|----------------|------------------|------|-----------|-----------------|----------------|------------------|----------------|------------------|----|
| 1  | 148.0427  | 74.5250         |                |                  |                |                  | M    |           |                 |                |                  |                |                  | 37 |
| 2  | 247.1111  | 124.0592        |                |                  |                |                  | V    | 3991.0196 | 1996.0134       | 3973.9930      | 1987.5002        | 3973.0090      | 1987.0081        | 36 |
| 3  | 334.1431  | 167.5752        |                |                  | 316.1326       | 158.5699         | S    | 3891.9512 | 1946.4792       | 3874.9246      | 1937.9660        | 3873.9406      | 1937.4739        | 35 |
| 4  | 471.2020  | 236.1047        |                |                  | 453.1915       | 227.0994         | H    | 3804.9191 | 1902.9632       | 3787.8926      | 1894.4499        | 3786.9086      | 1893.9579        | 34 |
| 5  | 608.2609  | 304.6341        |                |                  | 590.2504       | 295.6288         | H    | 3667.8602 | 1834.4338       | 3650.8337      | 1825.9205        | 3649.8497      | 1825.4285        | 33 |
| 6  | 723.2879  | 362.1476        | 706.2613       | 353.6343         | 705.2773       | 353.1423         | N    | 3530.8013 | 1765.9043       | 3513.7748      | 1757.3910        | 3512.7908      | 1756.8990        | 32 |
| 7  | 836.3719  | 418.6896        | 819.3454       | 410.1763         | 818.3614       | 409.6843         | L    | 3415.7744 | 1708.3908       | 3398.7478      | 1699.8776        | 3397.7638      | 1699.3855        | 31 |
| 8  | 937.4196  | 469.2135        | 920.3931       | 460.7002         | 919.4091       | 460.2082         | T    | 3302.6903 | 1651.8488       | 3285.6638      | 1643.3355        | 3284.6798      | 1642.8435        | 30 |
| 9  | 1038.4673 | 519.7373        | 1021.4408      | 511.2240         | 1020.4567      | 510.7320         | T    | 3201.6426 | 1601.3250       | 3184.6161      | 1592.8117        | 3183.6321      | 1592.3197        | 29 |
| 10 | 1095.4888 | 548.2480        | 1078.4622      | 539.7347         | 1077.4782      | 539.2427         | G    | 3100.5950 | 1550.8011       | 3083.5684      | 1542.2878        | 3082.5844      | 1541.7958        | 28 |
| 11 | 1166.5259 | 583.7666        | 1149.4993      | 575.2533         | 1148.5153      | 574.7613         | A    | 3043.5735 | 1522.2904       | 3026.5469      | 1513.7771        | 3025.5629      | 1513.2851        | 27 |
| 12 | 1267.5736 | 634.2904        | 1250.5470      | 625.7771         | 1249.5630      | 625.2851         | T    | 2972.5364 | 1486.7718       | 2955.5098      | 1478.2586        | 2954.5258      | 1477.7665        | 26 |
| 13 | 1380.6576 | 690.8325        | 1363.6311      | 682.3192         | 1362.6471      | 681.8272         | L    | 2871.4887 | 1436.2480       | 2854.4622      | 1427.7347        | 2853.4781      | 1427.2427        | 25 |
| 14 | 1493.7417 | 747.3745        | 1476.7151      | 738.8612         | 1475.7311      | 738.3692         | I    | 2758.4046 | 1379.7060       | 2741.3781      | 1371.1927        | 2740.3941      | 1370.7007        | 24 |
| 15 | 1608.7686 | 804.8880        | 1591.7421      | 796.3747         | 1590.7581      | 795.8827         | N    | 2645.3206 | 1323.1639       | 2628.2940      | 1314.6507        | 2627.3100      | 1314.1586        | 23 |
| 16 | 1737.8112 | 869.4093        | 1720.7847      | 860.8960         | 1719.8007      | 860.4040         | E    | 2530.2936 | 1265.6505       | 2513.2671      | 1257.1372        | 2512.2831      | 1256.6452        | 22 |
| 17 | 1865.8698 | 933.4385        | 1848.8433      | 924.9253         | 1847.8592      | 924.4333         | Q    | 2401.2510 | 1201.1292       | 2384.2245      | 1192.6159        | 2383.2405      | 1192.1239        | 21 |
| 18 | 2051.9491 | 1026.4782       | 2034.9226      | 1017.9649        | 2033.9386      | 1017.4729        | W    | 2273.1925 | 1137.0999       | 2256.1659      | 1128.5866        | 2255.1819      | 1128.0946        | 20 |
| 19 | 2165.0332 | 1083.0202       | 2148.0066      | 1074.5070        | 2147.0226      | 1074.0149        | L    | 2087.1131 | 1044.0602       | 2070.0866      | 1035.5469        | 2069.1026      | 1035.0549        | 19 |
| 20 | 2278.1172 | 1139.5623       | 2261.0907      | 1131.0490        | 2260.1067      | 1130.5570        | L    | 1974.0291 | 987.5182        | 1957.0025      | 979.0049         | 1956.0185      | 978.5129         | 18 |
| 21 | 2379.1649 | 1190.0861       | 2362.1384      | 1181.5728        | 2361.1544      | 1181.0808        | T    | 1860.9450 | 930.9761        | 1843.9185      | 922.4629         | 1842.9345      | 921.9709         | 17 |



|    |           |           |           |           |           |           |   |           |          |           |          |           |          |    |
|----|-----------|-----------|-----------|-----------|-----------|-----------|---|-----------|----------|-----------|----------|-----------|----------|----|
| 22 | 2480.2126 | 1240.6099 | 2463.1861 | 1232.0967 | 2462.2020 | 1231.6047 | T | 1759.8973 | 880.4523 | 1742.8708 | 871.9390 | 1741.8868 | 871.4470 | 16 |
| 23 | 2551.2497 | 1276.1285 | 2534.2232 | 1267.6152 | 2533.2392 | 1267.1232 | A | 1658.8497 | 829.9285 | 1641.8231 | 821.4152 | 1640.8391 | 820.9232 | 15 |
| 24 | 2679.3447 | 1340.1760 | 2662.3181 | 1331.6627 | 2661.3341 | 1331.1707 | K | 1587.8125 | 794.4099 | 1570.7860 | 785.8966 | 1569.8020 | 785.4046 | 14 |
| 25 | 2793.3876 | 1397.1974 | 2776.3611 | 1388.6842 | 2775.3770 | 1388.1922 | N | 1459.7176 | 730.3624 | 1442.6910 | 721.8492 | 1441.7070 | 721.3571 | 13 |
| 26 | 2906.4717 | 1453.7395 | 2889.4451 | 1445.2262 | 2888.4611 | 1444.7342 | L | 1345.6747 | 673.3410 | 1328.6481 | 664.8277 | 1327.6641 | 664.3357 | 12 |
| 27 | 3053.5401 | 1527.2737 | 3036.5135 | 1518.7604 | 3035.5295 | 1518.2684 | F | 1232.5906 | 616.7989 | 1215.5640 | 608.2857 | 1214.5800 | 607.7937 | 11 |
| 28 | 3166.6242 | 1583.8157 | 3149.5976 | 1575.3024 | 3148.6136 | 1574.8104 | L | 1085.5222 | 543.2647 | 1068.4956 | 534.7515 | 1067.5116 | 534.2594 | 10 |
| 29 | 3280.6671 | 1640.8372 | 3263.6405 | 1632.3239 | 3262.6565 | 1631.8319 | N | 972.4381  | 486.7227 | 955.4116  | 478.2094 | 954.4275  | 477.7174 | 9  |
| 30 | 3417.7260 | 1709.3666 | 3400.6994 | 1700.8534 | 3399.7154 | 1700.3614 | H | 858.3952  | 429.7012 | 841.3686  | 421.1880 | 840.3846  | 420.6959 | 8  |
| 31 | 3504.7580 | 1752.8826 | 3487.7315 | 1744.3694 | 3486.7475 | 1743.8774 | S | 721.3363  | 361.1718 | 704.3097  | 352.6585 | 703.3257  | 352.1665 | 7  |
| 32 | 3633.8006 | 1817.4039 | 3616.7741 | 1808.8907 | 3615.7900 | 1808.3987 | E | 634.3042  | 317.6558 | 617.2777  | 309.1425 | 616.2937  | 308.6505 | 6  |
| 33 | 3748.8276 | 1874.9174 | 3731.8010 | 1866.4041 | 3730.8170 | 1865.9121 | N | 505.2617  | 253.1345 | 488.2351  | 244.6212 | 487.2511  | 244.1292 | 5  |
| 34 | 3819.8647 | 1910.4360 | 3802.8381 | 1901.9227 | 3801.8541 | 1901.4307 | A | 390.2347  | 195.6210 | 373.2082  | 187.1077 | 372.2241  | 186.6157 | 4  |
| 35 | 3920.9123 | 1960.9598 | 3903.8858 | 1952.4465 | 3902.9018 | 1951.9545 | T | 319.1976  | 160.1024 | 302.1710  | 151.5892 | 301.1870  | 151.0972 | 3  |
| 36 | 3991.9495 | 1996.4784 | 3974.9229 | 1987.9651 | 3973.9389 | 1987.4731 | A | 218.1499  | 109.5786 | 201.1234  | 101.0653 |           |          | 2  |
| 37 |           |           |           |           |           |           | K | 147.1128  | 74.0600  | 130.0863  | 65.5468  |           |          | 1  |

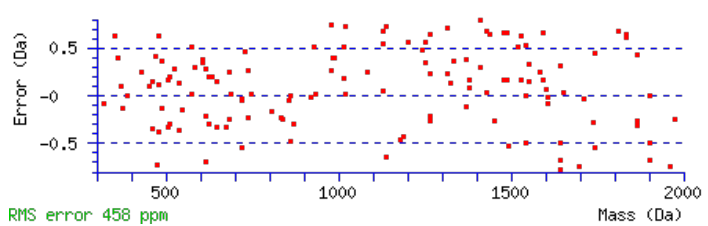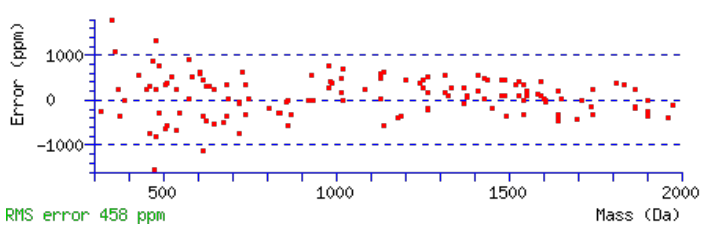

NCBI BLAST search of [MVSHHNLTTGATLINEQWLLTTAKNLFNLHSENATAK](#)  
 (Parameters: blastp, nr protein database, expect=20000, no filter, PAM30)  
 Other BLAST [web gateways](#)

All matches to this query

| Score | Mr(calc)  | Delta  | Sequence                                              | Site Analysis                  |
|-------|-----------|--------|-------------------------------------------------------|--------------------------------|
| 98.1  | 4137.0477 | 0.0210 | <a href="#">MVSHHNLTTGATLINEQWLLTTAKNLFNLHSENATAK</a> | Deamidated N6, N15, N33 91.70% |
| 84.3  | 4137.0477 | 0.0210 | <a href="#">MVSHHNLTTGATLINEQWLLTTAKNLFNLHSENATAK</a> | Deamidated N6, N29, N33 3.88%  |
| 80.1  | 4137.0477 | 0.0210 | <a href="#">MVSHHNLTTGATLINEQWLLTTAKNLFNLHSENATAK</a> | Deamidated N25, N29, N33 1.47% |
| 79.0  | 4137.0477 | 0.0210 | <a href="#">MVSHHNLTTGATLINEQWLLTTAKNLFNLHSENATAK</a> | Deamidated N15, Q17, N25 1.13% |
| 78.1  | 4137.0477 | 0.0210 | <a href="#">MVSHHNLTTGATLINEQWLLTTAKNLFNLHSENATAK</a> | Deamidated Q17, N25, N29 0.92% |
| 69.7  | 4136.0636 | 1.0051 | <a href="#">MVSHHNLTTGATLINEQWLLTTAKNLFNLHSENATAK</a> |                                |
| 69.3  | 4136.0636 | 1.0051 | <a href="#">MVSHHNLTTGATLINEQWLLTTAKNLFNLHSENATAK</a> |                                |
| 67.5  | 4137.0477 | 0.0210 | <a href="#">MVSHHNLTTGATLINEQWLLTTAKNLFNLHSENATAK</a> | Deamidated N6, N15, Q17 0.08%  |
| 67.3  | 4136.0636 | 1.0051 | <a href="#">MVSHHNLTTGATLINEQWLLTTAKNLFNLHSENATAK</a> |                                |
| 67.1  | 4136.0636 | 1.0051 | <a href="#">MVSHHNLTTGATLINEQWLLTTAKNLFNLHSENATAK</a> |                                |

Mascot: <http://www.matrixscience.com/>

# MASCOT SCIENCE Mascot Search Results

## Peptide View

MS/MS Fragmentation of **MVSHHNLTTGATLINEQWLLTTAKNLFNLHSEENATAK**

Found in **J3QR68** in **con\_Xuniprot\_HUMAN3**, J3QR68\_HUMAN Haptoglobin (Fragment) OS=Homo sapiens GN=HP PE=3 SV=1

Match to Query 28576: 4121.092136 from(1031.280310,4+) intensity(65368.3594) rtinseconds(2488) scans(6351) index(10448)

Title: 111019\_Est\_ISCardio\_NMI\_YS\_G\_6Spectrum5472\_scans\_\_6351

Data file C:\mascot\20140703\_Tmgf\_1D\CSV\_UseAnalysis\MasterCSV\All\_Glyco\mgf\ptm\UC18ERLIC\_PTM\_35D.mgf

Click mouse within plot area to zoom in by factor of two about that point

Or, to Da

Label all possible matches Label matches used for scoring

Show Y-axis

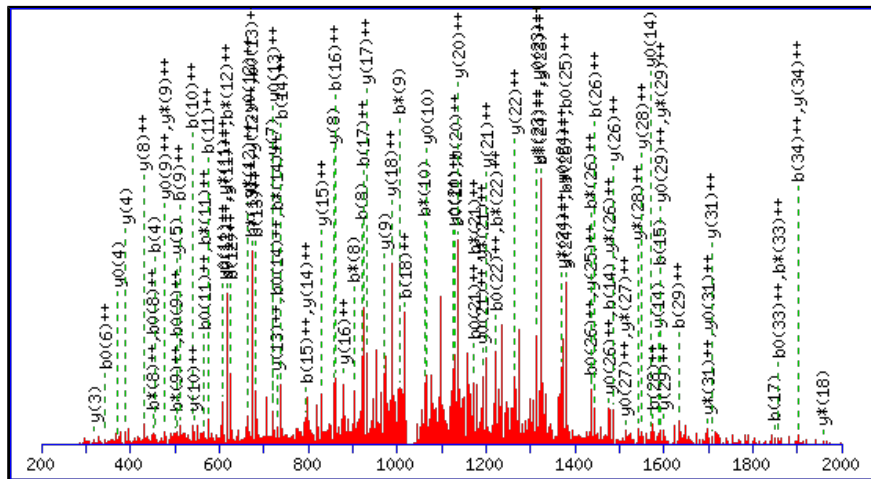

Monoisotopic mass of neutral peptide Mr(calc): 4120.0687

Fixed modifications: Carbamidomethyl (C) (apply to specified residues or termini only)

Variable modifications:

N25 : Deamidated (NQ)

N29 : Deamidated (NQ)

Ions Score: 96 Expect: 4.3e-008

Matches : 103/414 fragment ions using 154 most intense peaks ([help](#))

| #  | b                | b <sup>++</sup>  | b <sup>*</sup>   | b <sup>*++</sup> | b <sup>0</sup>   | b <sup>0++</sup> | Seq. | y         | y <sup>++</sup>  | y <sup>*</sup>   | y <sup>*++</sup> | y <sup>0</sup> | y <sup>0++</sup> | #  |
|----|------------------|------------------|------------------|------------------|------------------|------------------|------|-----------|------------------|------------------|------------------|----------------|------------------|----|
| 1  | 132.0478         | 66.5275          |                  |                  |                  |                  | M    |           |                  |                  |                  |                |                  | 37 |
| 2  | 231.1162         | 116.0617         |                  |                  |                  |                  | V    | 3990.0356 | 1995.5214        | 3973.0090        | 1987.0081        | 3972.0250      | 1986.5161        | 36 |
| 3  | 318.1482         | 159.5777         |                  |                  | 300.1376         | 150.5725         | S    | 3890.9672 | 1945.9872        | 3873.9406        | 1937.4739        | 3872.9566      | 1936.9819        | 35 |
| 4  | <b>455.2071</b>  | 228.1072         |                  |                  | 437.1966         | 219.1019         | H    | 3803.9351 | <b>1902.4712</b> | 3786.9086        | 1893.9579        | 3785.9246      | 1893.4659        | 34 |
| 5  | 592.2660         | 296.6367         |                  |                  | 574.2555         | 287.6314         | H    | 3666.8762 | 1833.9417        | 3649.8497        | 1825.4285        | 3648.8657      | 1824.9365        | 33 |
| 6  | 706.3090         | 353.6581         | 689.2824         | 345.1448         | 688.2984         | <b>344.6528</b>  | N    | 3529.8173 | 1765.4123        | 3512.7908        | 1756.8990        | 3511.8067      | 1756.4070        | 32 |
| 7  | 819.3930         | 410.2001         | 802.3665         | 401.6869         | 801.3825         | 401.1949         | L    | 3415.7744 | <b>1708.3908</b> | 3398.7478        | <b>1699.8776</b> | 3397.7638      | <b>1699.3855</b> | 31 |
| 8  | <b>920.4407</b>  | 460.7240         | <b>903.4141</b>  | <b>452.2107</b>  | 902.4301         | <b>451.7187</b>  | T    | 3302.6903 | 1651.8488        | 3285.6638        | 1643.3355        | 3284.6798      | 1642.8435        | 30 |
| 9  | 1021.4884        | <b>511.2478</b>  | <b>1004.4618</b> | <b>502.7346</b>  | 1003.4778        | <b>502.2425</b>  | T    | 3201.6426 | <b>1601.3250</b> | 3184.6161        | <b>1592.8117</b> | 3183.6321      | <b>1592.3197</b> | 29 |
| 10 | 1078.5098        | <b>539.7586</b>  | <b>1061.4833</b> | 531.2453         | 1060.4993        | 530.7533         | G    | 3100.5950 | <b>1550.8011</b> | 3083.5684        | <b>1542.2878</b> | 3082.5844      | 1541.7958        | 28 |
| 11 | 1149.5470        | <b>575.2771</b>  | 1132.5204        | <b>566.7638</b>  | <b>1131.5364</b> | <b>566.2718</b>  | A    | 3043.5735 | 1522.2904        | 3026.5469        | <b>1513.7771</b> | 3025.5629      | <b>1513.2851</b> | 27 |
| 12 | 1250.5946        | <b>625.8010</b>  | 1233.5681        | <b>617.2877</b>  | 1232.5841        | <b>616.7957</b>  | T    | 2972.5364 | <b>1486.7718</b> | 2955.5098        | <b>1478.2586</b> | 2954.5258      | <b>1477.7665</b> | 26 |
| 13 | 1363.6787        | <b>682.3430</b>  | 1346.6521        | <b>673.8297</b>  | 1345.6681        | <b>673.3377</b>  | L    | 2871.4887 | <b>1436.2480</b> | 2854.4622        | 1427.7347        | 2853.4781      | 1427.2427        | 25 |
| 14 | <b>1476.7628</b> | <b>738.8850</b>  | 1459.7362        | <b>730.3717</b>  | 1458.7522        | <b>729.8797</b>  | I    | 2758.4046 | <b>1379.7060</b> | 2741.3781        | <b>1371.1927</b> | 2740.3941      | <b>1370.7007</b> | 24 |
| 15 | <b>1590.8057</b> | <b>795.9065</b>  | 1573.7791        | 787.3932         | 1572.7951        | 786.9012         | N    | 2645.3206 | <b>1323.1639</b> | 2628.2940        | <b>1314.6506</b> | 2627.3100      | <b>1314.1586</b> | 23 |
| 16 | 1719.8483        | <b>860.4278</b>  | 1702.8217        | 851.9145         | 1701.8377        | 851.4225         | E    | 2531.2776 | <b>1266.1425</b> | 2514.2511        | 1257.6292        | 2513.2671      | 1257.1372        | 22 |
| 17 | <b>1847.9069</b> | <b>924.4571</b>  | 1830.8803        | 915.9438         | 1829.8963        | 915.4518         | Q    | 2402.2351 | <b>1201.6212</b> | 2385.2085        | <b>1193.1079</b> | 2384.2245      | <b>1192.6159</b> | 21 |
| 18 | 2033.9862        | <b>1017.4967</b> | 2016.9596        | 1008.9834        | 2015.9756        | 1008.4914        | W    | 2274.1765 | <b>1137.5919</b> | 2257.1499        | 1129.0786        | 2256.1659      | <b>1128.5866</b> | 20 |
| 19 | 2147.0702        | 1074.0388        | 2130.0437        | 1065.5255        | 2129.0597        | 1065.0335        | L    | 2088.0972 | 1044.5522        | 2071.0706        | 1036.0389        | 2070.0866      | 1035.5469        | 19 |
| 20 | 2260.1543        | <b>1130.5808</b> | 2243.1278        | 1122.0675        | 2242.1437        | 1121.5755        | L    | 1975.0131 | <b>988.0102</b>  | <b>1957.9865</b> | 979.4969         | 1957.0025      | 979.0049         | 18 |
| 21 | 2361.2020        | 1181.1046        | 2344.1754        | <b>1172.5914</b> | 2343.1914        | <b>1172.0993</b> | T    | 1861.9290 | <b>931.4682</b>  | 1844.9025        | 922.9549         | 1843.9185      | 922.4629         | 17 |
| 22 | 2462.2497        | 1231.6285        | 2445.2231        | <b>1223.1152</b> | 2444.2391        | <b>1222.6232</b> | T    | 1760.8814 | <b>880.9443</b>  | 1743.8548        | 872.4310         | 1742.8708      | 871.9390         | 16 |

|    |           |           |           |           |           |           |   |           |          |           |          |           |          |    |
|----|-----------|-----------|-----------|-----------|-----------|-----------|---|-----------|----------|-----------|----------|-----------|----------|----|
| 23 | 2533.2868 | 1267.1470 | 2516.2602 | 1258.6337 | 2515.2762 | 1258.1417 | A | 1659.8337 | 830.4205 | 1642.8071 | 821.9072 | 1641.8231 | 821.4152 | 15 |
| 24 | 2661.3817 | 1331.1945 | 2644.3552 | 1322.6812 | 2643.3712 | 1322.1892 | K | 1588.7966 | 794.9019 | 1571.7700 | 786.3886 | 1570.7860 | 785.8966 | 14 |
| 25 | 2776.4087 | 1388.7080 | 2759.3821 | 1380.1947 | 2758.3981 | 1379.7027 | N | 1460.7016 | 730.8544 | 1443.6751 | 722.3412 | 1442.6910 | 721.8492 | 13 |
| 26 | 2889.4927 | 1445.2500 | 2872.4662 | 1436.7367 | 2871.4822 | 1436.2447 | L | 1345.6747 | 673.3410 | 1328.6481 | 664.8277 | 1327.6641 | 664.3357 | 12 |
| 27 | 3036.5612 | 1518.7842 | 3019.5346 | 1510.2709 | 3018.5506 | 1509.7789 | F | 1232.5906 | 616.7989 | 1215.5640 | 608.2857 | 1214.5800 | 607.7937 | 11 |
| 28 | 3149.6452 | 1575.3262 | 3132.6187 | 1566.8130 | 3131.6347 | 1566.3210 | L | 1085.5222 | 543.2647 | 1068.4956 | 534.7515 | 1067.5116 | 534.2594 | 10 |
| 29 | 3264.6722 | 1632.8397 | 3247.6456 | 1624.3264 | 3246.6616 | 1623.8344 | N | 972.4381  | 486.7227 | 955.4116  | 478.2094 | 954.4275  | 477.7174 | 9  |
| 30 | 3401.7311 | 1701.3692 | 3384.7045 | 1692.8559 | 3383.7205 | 1692.3639 | H | 857.4112  | 429.2092 | 840.3846  | 420.6959 | 839.4006  | 420.2039 | 8  |
| 31 | 3488.7631 | 1744.8852 | 3471.7366 | 1736.3719 | 3470.7525 | 1735.8799 | S | 720.3523  | 360.6798 | 703.3257  | 352.1665 | 702.3417  | 351.6745 | 7  |
| 32 | 3617.8057 | 1809.4065 | 3600.7791 | 1800.8932 | 3599.7951 | 1800.4012 | E | 633.3202  | 317.1638 | 616.2937  | 308.6505 | 615.3097  | 308.1585 | 6  |
| 33 | 3731.8486 | 1866.4279 | 3714.8221 | 1857.9147 | 3713.8381 | 1857.4227 | N | 504.2776  | 252.6425 | 487.2511  | 244.1292 | 486.2671  | 243.6372 | 5  |
| 34 | 3802.8857 | 1901.9465 | 3785.8592 | 1893.4332 | 3784.8752 | 1892.9412 | A | 390.2347  | 195.6210 | 373.2082  | 187.1077 | 372.2241  | 186.6157 | 4  |
| 35 | 3903.9334 | 1952.4703 | 3886.9069 | 1943.9571 | 3885.9229 | 1943.4651 | T | 319.1976  | 160.1024 | 302.1710  | 151.5892 | 301.1870  | 151.0972 | 3  |
| 36 | 3974.9705 | 1987.9889 | 3957.9440 | 1979.4756 | 3956.9600 | 1978.9836 | A | 218.1499  | 109.5786 | 201.1234  | 101.0653 |           |          | 2  |
| 37 |           |           |           |           |           |           | K | 147.1128  | 74.0600  | 130.0863  | 65.5468  |           |          | 1  |

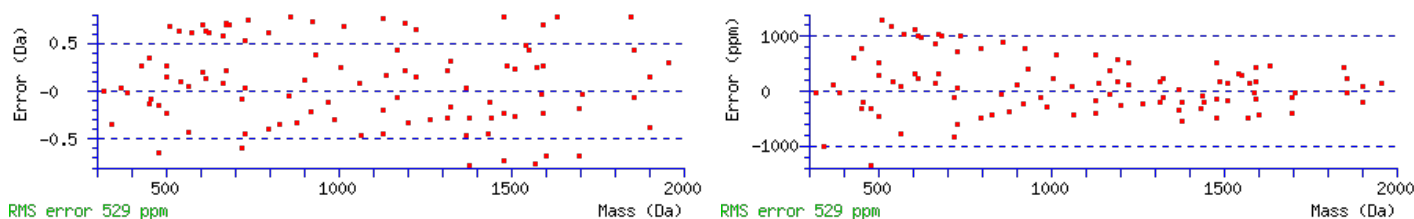

NCBI BLAST search of [MVSHHNLTTGATLINEQWLLTTAKNLFNLHSENATAK](#)

(Parameters: blastp, nr protein database, expect=20000, no filter, PAM30)

Other BLAST [web gateways](#)

All matches to this query

| Score | Mr(calc)  | Delta  | Sequence                                              | Site Analysis              |
|-------|-----------|--------|-------------------------------------------------------|----------------------------|
| 95.8  | 4120.0687 | 1.0234 | <a href="#">MVSHHNLTTGATLINEQWLLTTAKNLFNLHSENATAK</a> | Deamidated N25, N29 32.46% |
| 94.9  | 4120.0687 | 1.0234 | <a href="#">MVSHHNLTTGATLINEQWLLTTAKNLFNLHSENATAK</a> | Deamidated N15, N29 26.08% |
| 92.9  | 4120.0687 | 1.0234 | <a href="#">MVSHHNLTTGATLINEQWLLTTAKNLFNLHSENATAK</a> | Deamidated N25, N33 16.61% |
| 90.0  | 4120.0687 | 1.0234 | <a href="#">MVSHHNLTTGATLINEQWLLTTAKNLFNLHSENATAK</a> | Deamidated N29, N33 8.48%  |
| 87.7  | 4120.0687 | 1.0234 | <a href="#">MVSHHNLTTGATLINEQWLLTTAKNLFNLHSENATAK</a> | Deamidated N6, N29 4.97%   |
| 85.6  | 4120.0687 | 1.0234 | <a href="#">MVSHHNLTTGATLINEQWLLTTAKNLFNLHSENATAK</a> | Deamidated Q17, N29 3.06%  |
| 83.8  | 4120.0687 | 1.0234 | <a href="#">MVSHHNLTTGATLINEQWLLTTAKNLFNLHSENATAK</a> | Deamidated N15, N33 2.01%  |
| 82.8  | 4120.0687 | 1.0234 | <a href="#">MVSHHNLTTGATLINEQWLLTTAKNLFNLHSENATAK</a> | Deamidated Q17, N33 1.63%  |
| 79.8  | 4120.0687 | 1.0234 | <a href="#">MVSHHNLTTGATLINEQWLLTTAKNLFNLHSENATAK</a> | Deamidated N15, N25 0.80%  |
| 79.7  | 4120.0687 | 1.0234 | <a href="#">MVSHHNLTTGATLINEQWLLTTAKNLFNLHSENATAK</a> | Deamidated N15, Q17 0.78%  |

Mascot: <http://www.matrixscience.com/>

# MASCOT SCIENCE Mascot Search Results

## Peptide View

MS/MS Fragmentation of **MVSHHNLTTGATLINEQWLLTTAKNLFNLHSEENATAK**

Found in **J3QR68** in **con\_Xuniprot\_HUMAN3**, J3QR68\_HUMAN Haptoglobin (Fragment) OS=Homo sapiens GN=HP PE=3 SV=1

Match to Query 28929: 4138.043856 from(1035.518240,4+) intensity(15285.0820) rtinseconds(2591) scans(6852) index(18959)

Title: 111019\_Est\_MI\_YP\_G\_08Spectrum5988\_scans\_\_6852

Data file C:\mascot\20140703\_Tmgf\_1D\CSV\_UseAnalysis\MasterCSV\All\_Glyco\mgf\ptm\UC18ERLIC\_PTM\_35D.mgf

Click mouse within plot area to zoom in by factor of two about that point

Or, to Da

Label all possible matches Label matches used for scoring

Show Y-axis

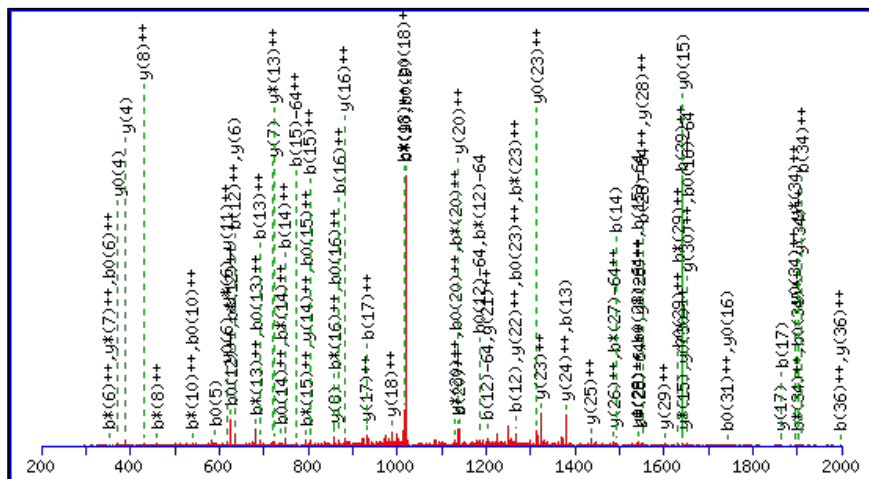

Monoisotopic mass of neutral peptide Mr(calc): 4138.0317

Fixed modifications: Carbamidomethyl (C) (apply to specified residues or termini only)

Variable modifications:

M1 : Oxidation (M), with neutral losses 0.0000(shown in table), 63.9983

Q17 : Deamidated (NQ)

N25 : Deamidated (NQ)

N29 : Deamidated (NQ)

N33 : Deamidated (NQ)

Ions Score: 95 Expect: 6.7e-008

Matches : 91/616 fragment ions using 104 most intense peaks ([help](#))

| #  | b         | b <sup>++</sup> | b*        | b* <sup>++</sup> | b <sup>0</sup> | b <sup>0++</sup> | Seq. | y         | y <sup>++</sup> | y*        | y* <sup>++</sup> | y <sup>0</sup> | y <sup>0++</sup> | #  |
|----|-----------|-----------------|-----------|------------------|----------------|------------------|------|-----------|-----------------|-----------|------------------|----------------|------------------|----|
| 1  | 148.0427  | 74.5250         |           |                  |                |                  | M    |           |                 |           |                  |                |                  | 37 |
| 2  | 247.1111  | 124.0592        |           |                  |                |                  | V    | 3992.0036 | 1996.5054       | 3974.9771 | 1987.9922        | 3973.9930      | 1987.5002        | 36 |
| 3  | 334.1431  | 167.5752        |           |                  | 316.1326       | 158.5699         | S    | 3892.9352 | 1946.9712       | 3875.9086 | 1938.4580        | 3874.9246      | 1937.9660        | 35 |
| 4  | 471.2020  | 236.1047        |           |                  | 453.1915       | 227.0994         | H    | 3805.9032 | 1903.4552       | 3788.8766 | 1894.9419        | 3787.8926      | 1894.4499        | 34 |
| 5  | 608.2609  | 304.6341        |           |                  | 590.2504       | 295.6288         | H    | 3668.8443 | 1834.9258       | 3651.8177 | 1826.4125        | 3650.8337      | 1825.9205        | 33 |
| 6  | 722.3039  | 361.6556        | 705.2773  | 353.1423         | 704.2933       | 352.6503         | N    | 3531.7853 | 1766.3963       | 3514.7588 | 1757.8830        | 3513.7748      | 1757.3910        | 32 |
| 7  | 835.3879  | 418.1976        | 818.3614  | 409.6843         | 817.3774       | 409.1923         | L    | 3417.7424 | 1709.3748       | 3400.7159 | 1700.8616        | 3399.7318      | 1700.3696        | 31 |
| 8  | 936.4356  | 468.7214        | 919.4091  | 460.2082         | 918.4250       | 459.7162         | T    | 3304.6583 | 1652.8328       | 3287.6318 | 1644.3195        | 3286.6478      | 1643.8275        | 30 |
| 9  | 1037.4833 | 519.2453        | 1020.4567 | 510.7320         | 1019.4727      | 510.2400         | T    | 3203.6107 | 1602.3090       | 3186.5841 | 1593.7957        | 3185.6001      | 1593.3037        | 29 |
| 10 | 1094.5048 | 547.7560        | 1077.4782 | 539.2427         | 1076.4942      | 538.7507         | G    | 3102.5630 | 1551.7851       | 3085.5364 | 1543.2719        | 3084.5524      | 1542.7799        | 28 |
| 11 | 1165.5419 | 583.2746        | 1148.5153 | 574.7613         | 1147.5313      | 574.2693         | A    | 3045.5415 | 1523.2744       | 3028.5150 | 1514.7611        | 3027.5310      | 1514.2691        | 27 |
| 12 | 1266.5895 | 633.7984        | 1249.5630 | 625.2851         | 1248.5790      | 624.7931         | T    | 2974.5044 | 1487.7558       | 2957.4779 | 1479.2426        | 2956.4938      | 1478.7506        | 26 |
| 13 | 1379.6736 | 690.3404        | 1362.6471 | 681.8272         | 1361.6630      | 681.3352         | L    | 2873.4567 | 1437.2320       | 2856.4302 | 1428.7187        | 2855.4462      | 1428.2267        | 25 |
| 14 | 1492.7577 | 746.8825        | 1475.7311 | 738.3692         | 1474.7471      | 737.8772         | I    | 2760.3727 | 1380.6900       | 2743.3461 | 1372.1767        | 2742.3621      | 1371.6847        | 24 |
| 15 | 1606.8006 | 803.9039        | 1589.7741 | 795.3907         | 1588.7900      | 794.8987         | N    | 2647.2886 | 1324.1479       | 2630.2621 | 1315.6347        | 2629.2780      | 1315.1427        | 23 |
| 16 | 1735.8432 | 868.4252        | 1718.8166 | 859.9120         | 1717.8326      | 859.4200         | E    | 2533.2457 | 1267.1265       | 2516.2191 | 1258.6132        | 2515.2351      | 1258.1212        | 22 |
| 17 | 1864.8858 | 932.9465        | 1847.8592 | 924.4333         | 1846.8752      | 923.9413         | Q    | 2404.2031 | 1202.6052       | 2387.1765 | 1194.0919        | 2386.1925      | 1193.5999        | 21 |
| 18 | 2050.9651 | 1025.9862       | 2033.9386 | 1017.4729        | 2032.9545      | 1016.9809        | W    | 2275.1605 | 1138.0839       | 2258.1339 | 1129.5706        | 2257.1499      | 1129.0786        | 20 |
| 19 | 2164.0492 | 1082.5282       | 2147.0226 | 1074.0149        | 2146.0386      | 1073.5229        | L    | 2089.0812 | 1045.0442       | 2072.0546 | 1036.5310        | 2071.0706      | 1036.0389        | 19 |
| 20 | 2277.1332 | 1139.0703       | 2260.1067 | 1130.5570        | 2259.1227      | 1130.0650        | L    | 1975.9971 | 988.5022        | 1958.9706 | 979.9889         | 1957.9865      | 979.4969         | 18 |
| 21 | 2378.1809 | 1189.5941       | 2361.1544 | 1181.0808        | 2360.1703      | 1180.5888        | T    | 1862.9130 | 931.9602        | 1845.8865 | 923.4469         | 1844.9025      | 922.9549         | 17 |

|    |           |           |           |           |           |           |   |           |          |           |          |           |          |    |
|----|-----------|-----------|-----------|-----------|-----------|-----------|---|-----------|----------|-----------|----------|-----------|----------|----|
| 22 | 2479.2286 | 1240.1179 | 2462.2020 | 1231.6047 | 2461.2180 | 1231.1126 | T | 1761.8654 | 881.4363 | 1744.8388 | 872.9230 | 1743.8548 | 872.4310 | 16 |
| 23 | 2550.2657 | 1275.6365 | 2533.2392 | 1267.1232 | 2532.2551 | 1266.6312 | A | 1660.8177 | 830.9125 | 1643.7911 | 822.3992 | 1642.8071 | 821.9072 | 15 |
| 24 | 2678.3607 | 1339.6840 | 2661.3341 | 1331.1707 | 2660.3501 | 1330.6787 | K | 1589.7806 | 795.3939 | 1572.7540 | 786.8807 | 1571.7700 | 786.3886 | 14 |
| 25 | 2793.3876 | 1397.1974 | 2776.3611 | 1388.6842 | 2775.3770 | 1388.1922 | N | 1461.6856 | 731.3464 | 1444.6591 | 722.8332 | 1443.6751 | 722.3412 | 13 |
| 26 | 2906.4717 | 1453.7395 | 2889.4451 | 1445.2262 | 2888.4611 | 1444.7342 | L | 1346.6587 | 673.8330 | 1329.6321 | 665.3197 | 1328.6481 | 664.8277 | 12 |
| 27 | 3053.5401 | 1527.2737 | 3036.5135 | 1518.7604 | 3035.5295 | 1518.2684 | F | 1233.5746 | 617.2909 | 1216.5481 | 608.7777 | 1215.5640 | 608.2857 | 11 |
| 28 | 3166.6242 | 1583.8157 | 3149.5976 | 1575.3024 | 3148.6136 | 1574.8104 | L | 1086.5062 | 543.7567 | 1069.4796 | 535.2435 | 1068.4956 | 534.7515 | 10 |
| 29 | 3281.6511 | 1641.3292 | 3264.6245 | 1632.8159 | 3263.6405 | 1632.3239 | N | 973.4221  | 487.2147 | 956.3956  | 478.7014 | 955.4116  | 478.2094 | 9  |
| 30 | 3418.7100 | 1709.8586 | 3401.6835 | 1701.3454 | 3400.6994 | 1700.8534 | H | 858.3952  | 429.7012 | 841.3686  | 421.1880 | 840.3846  | 420.6959 | 8  |
| 31 | 3505.7420 | 1753.3747 | 3488.7155 | 1744.8614 | 3487.7315 | 1744.3694 | S | 721.3363  | 361.1718 | 704.3097  | 352.6585 | 703.3257  | 352.1665 | 7  |
| 32 | 3634.7846 | 1817.8960 | 3617.7581 | 1809.3827 | 3616.7741 | 1808.8907 | E | 634.3042  | 317.6558 | 617.2777  | 309.1425 | 616.2937  | 308.6505 | 6  |
| 33 | 3749.8116 | 1875.4094 | 3732.7850 | 1866.8961 | 3731.8010 | 1866.4041 | N | 505.2617  | 253.1345 | 488.2351  | 244.6212 | 487.2511  | 244.1292 | 5  |
| 34 | 3820.8487 | 1910.9280 | 3803.8221 | 1902.4147 | 3802.8381 | 1901.9227 | A | 390.2347  | 195.6210 | 373.2082  | 187.1077 | 372.2241  | 186.6157 | 4  |
| 35 | 3921.8964 | 1961.4518 | 3904.8698 | 1952.9385 | 3903.8858 | 1952.4465 | T | 319.1976  | 160.1024 | 302.1710  | 151.5892 | 301.1870  | 151.0972 | 3  |
| 36 | 3992.9335 | 1996.9704 | 3975.9069 | 1988.4571 | 3974.9229 | 1987.9651 | A | 218.1499  | 109.5786 | 201.1234  | 101.0653 |           |          | 2  |
| 37 |           |           |           |           |           |           | K | 147.1128  | 74.0600  | 130.0863  | 65.5468  |           |          | 1  |

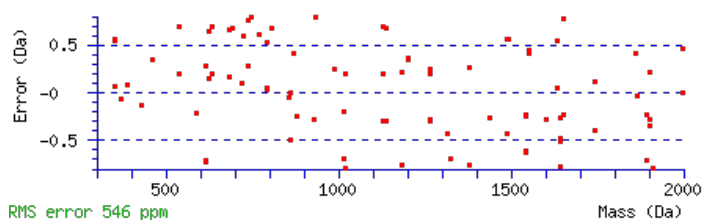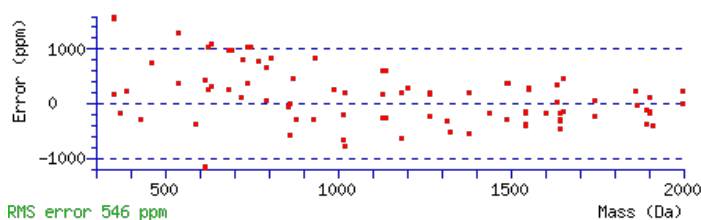

NCBI BLAST search of [MVSHHNLTGATLINEQWLLTTAKNLFNHSENATAK](#)

(Parameters: blastp, nr protein database, expect=20000, no filter, PAM30)

Other BLAST [web gateways](#)

All matches to this query

| Score | Mr(calc)  | Delta  | Sequence                                            | Site Analysis                        |
|-------|-----------|--------|-----------------------------------------------------|--------------------------------------|
| 95.4  | 4138.0317 | 0.0122 | <a href="#">MVSHHNLTGATLINEQWLLTTAKNLFNHSENATAK</a> | Deamidated Q17, N25, N29, N33 50.40% |
| 91.8  | 4138.0317 | 0.0122 | <a href="#">MVSHHNLTGATLINEQWLLTTAKNLFNHSENATAK</a> | Deamidated N15, N25, N29, N33 21.90% |
| 86.8  | 4138.0317 | 0.0122 | <a href="#">MVSHHNLTGATLINEQWLLTTAKNLFNHSENATAK</a> | Deamidated N6, N25, N29, N33 6.88%   |
| 85.8  | 4138.0317 | 0.0122 | <a href="#">MVSHHNLTGATLINEQWLLTTAKNLFNHSENATAK</a> | Deamidated N6, Q17, N25, N33 5.48%   |
| 84.0  | 4138.0317 | 0.0122 | <a href="#">MVSHHNLTGATLINEQWLLTTAKNLFNHSENATAK</a> | Deamidated N6, Q17, N29, N33 3.66%   |
| 83.6  | 4138.0317 | 0.0122 | <a href="#">MVSHHNLTGATLINEQWLLTTAKNLFNHSENATAK</a> | Deamidated N6, N15, N25, N33 3.31%   |
| 82.0  | 4138.0317 | 0.0122 | <a href="#">MVSHHNLTGATLINEQWLLTTAKNLFNHSENATAK</a> | Deamidated N15, Q17, N29, N33 2.28%  |
| 82.0  | 4138.0317 | 0.0122 | <a href="#">MVSHHNLTGATLINEQWLLTTAKNLFNHSENATAK</a> | Deamidated N6, N15, N29, N33 2.26%   |
| 80.3  | 4137.0477 | 0.9962 | <a href="#">MVSHHNLTGATLINEQWLLTTAKNLFNHSENATAK</a> |                                      |
| 76.6  | 4138.0317 | 0.0122 | <a href="#">MVSHHNLTGATLINEQWLLTTAKNLFNHSENATAK</a> | Deamidated N15, Q17, N25, N33 0.66%  |

Mascot: <http://www.matrixscience.com/>



# MATRIX SCIENCE Mascot Search Results

## Peptide View

MS/MS Fragmentation of **MVSHHNLTTGATLINEQWLLTTAKNLFNLHSEENATAK**

Found in **J3QR68** in **con\_Xuniprot\_HUMAN3**, J3QR68\_HUMAN Haptoglobin (Fragment) OS=Homo sapiens GN=HP PE=3 SV=1

Match to Query 28587: 4121.102736 from(1031.282960,4+) intensity(0.0000) rtinseconds(2477) scans(6530) index(9785)

Title: 111019\_Est\_ISCardio\_NMI\_YS\_G\_5Spectrum5650\_scans\_\_6530

Data file C:\mascot\20140703\_Tmgf\_1D\CSV\_UseAnalysis\MasterCSV\All\_Glyco\mgf\ptm\UC18ERLIC\_PTM\_35D.mgf

Click mouse within plot area to zoom in by factor of two about that point

Or, to Da

Label all possible matches Label matches used for scoring

Show Y-axis

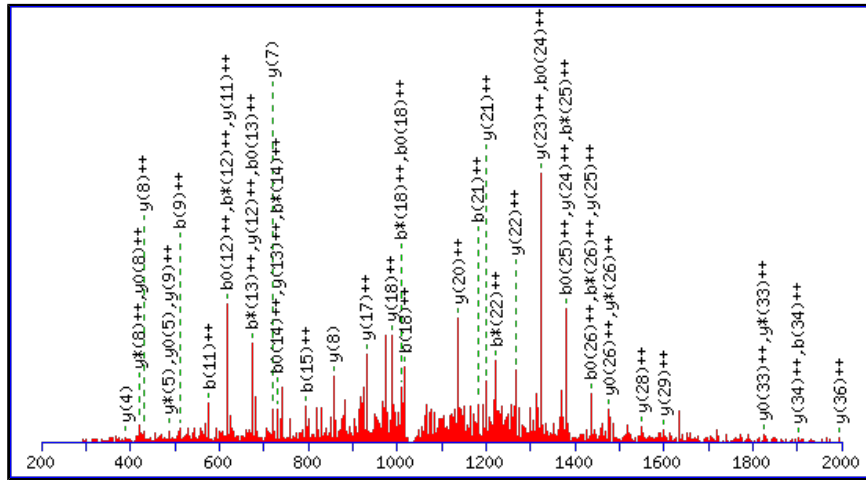

Monoisotopic mass of neutral peptide Mr(calc): 4119.0847

Fixed modifications: Carbamidomethyl (C) (apply to specified residues or termini only)

Variable modifications:

N29 : Deamidated (NQ)

Ions Score: 93 Expect: 8.5e-008

Matches : 49/414 fragment ions using 52 most intense peaks ([help](#))

| #  | b         | b <sup>++</sup> | b <sup>*</sup> | b <sup>*++</sup> | b <sup>0</sup> | b <sup>0++</sup> | Seq. | y         | y <sup>++</sup> | y <sup>*</sup> | y <sup>*++</sup> | y <sup>0</sup> | y <sup>0++</sup> | #  |
|----|-----------|-----------------|----------------|------------------|----------------|------------------|------|-----------|-----------------|----------------|------------------|----------------|------------------|----|
| 1  | 132.0478  | 66.5275         |                |                  |                |                  | M    |           |                 |                |                  |                |                  | 37 |
| 2  | 231.1162  | 116.0617        |                |                  |                |                  | V    | 3989.0516 | 1995.0294       | 3972.0250      | 1986.5161        | 3971.0410      | 1986.0241        | 36 |
| 3  | 318.1482  | 159.5777        |                |                  | 300.1376       | 150.5725         | S    | 3889.9831 | 1945.4952       | 3872.9566      | 1936.9819        | 3871.9726      | 1936.4899        | 35 |
| 4  | 455.2071  | 228.1072        |                |                  | 437.1966       | 219.1019         | H    | 3802.9511 | 1901.9792       | 3785.9246      | 1893.4659        | 3784.9405      | 1892.9739        | 34 |
| 5  | 592.2660  | 296.6367        |                |                  | 574.2555       | 287.6314         | H    | 3665.8922 | 1833.4497       | 3648.8657      | 1824.9365        | 3647.8816      | 1824.4445        | 33 |
| 6  | 706.3090  | 353.6581        | 689.2824       | 345.1448         | 688.2984       | 344.6528         | N    | 3528.8333 | 1764.9203       | 3511.8067      | 1756.4070        | 3510.8227      | 1755.9150        | 32 |
| 7  | 819.3930  | 410.2001        | 802.3665       | 401.6869         | 801.3825       | 401.1949         | L    | 3414.7904 | 1707.8988       | 3397.7638      | 1699.3855        | 3396.7798      | 1698.8935        | 31 |
| 8  | 920.4407  | 460.7240        | 903.4141       | 452.2107         | 902.4301       | 451.7187         | T    | 3301.7063 | 1651.3568       | 3284.6798      | 1642.8435        | 3283.6957      | 1642.3515        | 30 |
| 9  | 1021.4884 | 511.2478        | 1004.4618      | 502.7346         | 1003.4778      | 502.2425         | T    | 3200.6586 | 1600.8329       | 3183.6321      | 1592.3197        | 3182.6481      | 1591.8277        | 29 |
| 10 | 1078.5098 | 539.7586        | 1061.4833      | 531.2453         | 1060.4993      | 530.7533         | G    | 3099.6109 | 1550.3091       | 3082.5844      | 1541.7958        | 3081.6004      | 1541.3038        | 28 |
| 11 | 1149.5470 | 575.2771        | 1132.5204      | 566.7638         | 1131.5364      | 566.2718         | A    | 3042.5895 | 1521.7984       | 3025.5629      | 1513.2851        | 3024.5789      | 1512.7931        | 27 |
| 12 | 1250.5946 | 625.8010        | 1233.5681      | 617.2877         | 1232.5841      | 616.7957         | T    | 2971.5524 | 1486.2798       | 2954.5258      | 1477.7665        | 2953.5418      | 1477.2745        | 26 |
| 13 | 1363.6787 | 682.3430        | 1346.6521      | 673.8297         | 1345.6681      | 673.3377         | L    | 2870.5047 | 1435.7560       | 2853.4781      | 1427.2427        | 2852.4941      | 1426.7507        | 25 |
| 14 | 1476.7628 | 738.8850        | 1459.7362      | 730.3717         | 1458.7522      | 729.8797         | I    | 2757.4206 | 1379.2139       | 2740.3941      | 1370.7007        | 2739.4101      | 1370.2087        | 24 |
| 15 | 1590.8057 | 795.9065        | 1573.7791      | 787.3932         | 1572.7951      | 786.9012         | N    | 2644.3366 | 1322.6719       | 2627.3100      | 1314.1586        | 2626.3260      | 1313.6666        | 23 |
| 16 | 1719.8483 | 860.4278        | 1702.8217      | 851.9145         | 1701.8377      | 851.4225         | E    | 2530.2936 | 1265.6505       | 2513.2671      | 1257.1372        | 2512.2831      | 1256.6452        | 22 |
| 17 | 1847.9069 | 924.4571        | 1830.8803      | 915.9438         | 1829.8963      | 915.4518         | Q    | 2401.2510 | 1201.1292       | 2384.2245      | 1192.6159        | 2383.2405      | 1192.1239        | 21 |
| 18 | 2033.9862 | 1017.4967       | 2016.9596      | 1008.9834        | 2015.9756      | 1008.4914        | W    | 2273.1925 | 1137.0999       | 2256.1659      | 1128.5866        | 2255.1819      | 1128.0946        | 20 |
| 19 | 2147.0702 | 1074.0388       | 2130.0437      | 1065.5255        | 2129.0597      | 1065.0335        | L    | 2087.1131 | 1044.0602       | 2070.0866      | 1035.5469        | 2069.1026      | 1035.0549        | 19 |
| 20 | 2260.1543 | 1130.5808       | 2243.1278      | 1122.0675        | 2242.1437      | 1121.5755        | L    | 1974.0291 | 987.5182        | 1957.0025      | 979.0049         | 1956.0185      | 978.5129         | 18 |
| 21 | 2361.2020 | 1181.1046       | 2344.1754      | 1172.5914        | 2343.1914      | 1172.0993        | T    | 1860.9450 | 930.9761        | 1843.9185      | 922.4629         | 1842.9345      | 921.9709         | 17 |
| 22 | 2462.2497 | 1231.6285       | 2445.2231      | 1223.1152        | 2444.2391      | 1222.6232        | T    | 1759.8973 | 880.4523        | 1742.8708      | 871.9390         | 1741.8868      | 871.4470         | 16 |
| 23 | 2533.2868 | 1267.1470       | 2516.2602      | 1258.6337        | 2515.2762      | 1258.1417        | A    | 1658.8497 | 829.9285        | 1641.8231      | 821.4152         | 1640.8391      | 820.9232         | 15 |

|    |           |           |           |           |           |           |   |           |          |           |          |           |          |    |
|----|-----------|-----------|-----------|-----------|-----------|-----------|---|-----------|----------|-----------|----------|-----------|----------|----|
| 24 | 2661.3817 | 1331.1945 | 2644.3552 | 1322.6812 | 2643.3712 | 1322.1892 | K | 1587.8125 | 794.4099 | 1570.7860 | 785.8966 | 1569.8020 | 785.4046 | 14 |
| 25 | 2775.4247 | 1388.2160 | 2758.3981 | 1379.7027 | 2757.4141 | 1379.2107 | N | 1459.7176 | 730.3624 | 1442.6910 | 721.8492 | 1441.7070 | 721.3571 | 13 |
| 26 | 2888.5087 | 1444.7580 | 2871.4822 | 1436.2447 | 2870.4982 | 1435.7527 | L | 1345.6747 | 673.3410 | 1328.6481 | 664.8277 | 1327.6641 | 664.3357 | 12 |
| 27 | 3035.5771 | 1518.2922 | 3018.5506 | 1509.7789 | 3017.5666 | 1509.2869 | F | 1232.5906 | 616.7989 | 1215.5640 | 608.2857 | 1214.5800 | 607.7937 | 11 |
| 28 | 3148.6612 | 1574.8342 | 3131.6347 | 1566.3210 | 3130.6506 | 1565.8290 | L | 1085.5222 | 543.2647 | 1068.4956 | 534.7515 | 1067.5116 | 534.2594 | 10 |
| 29 | 3263.6881 | 1632.3477 | 3246.6616 | 1623.8344 | 3245.6776 | 1623.3424 | N | 972.4381  | 486.7227 | 955.4116  | 478.2094 | 954.4275  | 477.7174 | 9  |
| 30 | 3400.7471 | 1700.8772 | 3383.7205 | 1692.3639 | 3382.7365 | 1691.8719 | H | 857.4112  | 429.2092 | 840.3846  | 420.6959 | 839.4006  | 420.2039 | 8  |
| 31 | 3487.7791 | 1744.3932 | 3470.7525 | 1735.8799 | 3469.7685 | 1735.3879 | S | 720.3523  | 360.6798 | 703.3257  | 352.1665 | 702.3417  | 351.6745 | 7  |
| 32 | 3616.8217 | 1808.9145 | 3599.7951 | 1800.4012 | 3598.8111 | 1799.9092 | E | 633.3202  | 317.1638 | 616.2937  | 308.6505 | 615.3097  | 308.1585 | 6  |
| 33 | 3730.8646 | 1865.9359 | 3713.8381 | 1857.4227 | 3712.8540 | 1856.9307 | N | 504.2776  | 252.6425 | 487.2511  | 244.1292 | 486.2671  | 243.6372 | 5  |
| 34 | 3801.9017 | 1901.4545 | 3784.8752 | 1892.9412 | 3783.8912 | 1892.4492 | A | 390.2347  | 195.6210 | 373.2082  | 187.1077 | 372.2241  | 186.6157 | 4  |
| 35 | 3902.9494 | 1951.9783 | 3885.9229 | 1943.4651 | 3884.9388 | 1942.9731 | T | 319.1976  | 160.1024 | 302.1710  | 151.5892 | 301.1870  | 151.0972 | 3  |
| 36 | 3973.9865 | 1987.4969 | 3956.9600 | 1978.9836 | 3955.9759 | 1978.4916 | A | 218.1499  | 109.5786 | 201.1234  | 101.0653 |           |          | 2  |
| 37 |           |           |           |           |           |           | K | 147.1128  | 74.0600  | 130.0863  | 65.5468  |           |          | 1  |

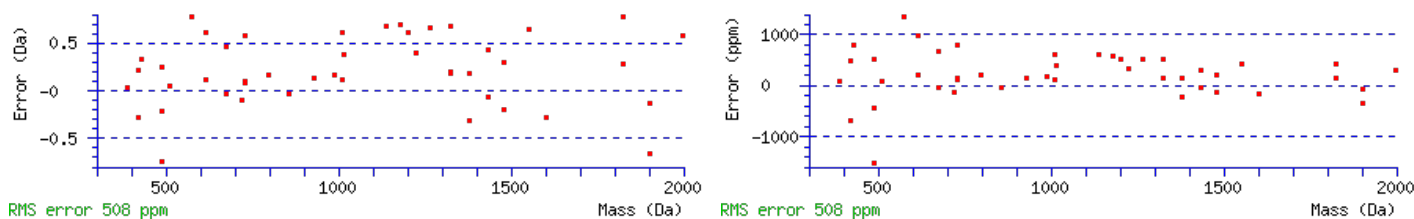

NCBI BLAST search of [MVSHHNLTTGATLINEQWLLTTAKNLFNLHSENATAK](#)

(Parameters: blastp, nr protein database, expect=20000, no filter, PAM30)

Other BLAST [web gateways](#)

All matches to this query

| Score | Mr(calc)  | Delta   | Sequence                                                  | Site Analysis         |
|-------|-----------|---------|-----------------------------------------------------------|-----------------------|
| 92.6  | 4119.0847 | 2.0180  | <a href="#">MVSHHNLTTGATLINEQWLLTTAKNLFNLHSENATAK</a>     | Deamidated N29 65.50% |
| 88.9  | 4119.0847 | 2.0180  | <a href="#">MVSHHNLTTGATLINEQWLLTTAKNLFNLHSENATAK</a>     | Deamidated N33 28.20% |
| 78.0  | 4119.0847 | 2.0180  | <a href="#">MVSHHNLTTGATLINEQWLLTTAKNLFNLHSENATAK</a>     | Deamidated Q17 2.25%  |
| 77.8  | 4119.0847 | 2.0180  | <a href="#">MVSHHNLTTGATLINEQWLLTTAKNLFNLHSENATAK</a>     | Deamidated N25 2.15%  |
| 76.9  | 4119.0847 | 2.0180  | <a href="#">MVSHHNLTTGATLINEQWLLTTAKNLFNLHSENATAK</a>     | Deamidated N15 1.77%  |
| 65.2  | 4119.0847 | 2.0180  | <a href="#">MVSHHNLTTGATLINEQWLLTTAKNLFNLHSENATAK</a>     | Deamidated N6 0.12%   |
| 12.2  | 4121.1051 | -0.0024 | <a href="#">GTRSVFPEFGADPSAPNTGTLNWFPPESTAPALPLQVGLYK</a> |                       |
| 11.5  | 4120.0997 | 1.0030  | <a href="#">GRQLNISALDLTSSNSLVFLRETLEENMLQDQVQLK</a>      |                       |
| 10.0  | 4120.0851 | 1.0176  | <a href="#">ITSDQVINSGLIFEDKPKPSKQSLQSYQEALQQQIR</a>      |                       |
| 9.9   | 4120.0851 | 1.0176  | <a href="#">ITSDQVINSGLIFEDKPKPSKQSLQSYQEALQQQIR</a>      |                       |

Mascot: <http://www.matrixscience.com/>



# MASCOT SCIENCE Mascot Search Results

## Peptide View

MS/MS Fragmentation of **MVSHHNLTTGATLINEQWLLTTAKNLFNLHSEENATAK**

Found in **J3QR68** in **con\_Xuniprot\_HUMAN3**, J3QR68\_HUMAN Haptoglobin (Fragment) OS=Homo sapiens GN=HP PE=3 SV=1

Match to Query 28930: 4138.048092 from(1380.356640,3+) intensity(60045.7773) rtinseconds(2575) scans(6726) index(25642)

Title: 111019\_Est\_MI\_YS\_G\_07Spectrum5794\_scans\_6726

Data file C:\mascot\20140703\_Tmgf\_1D\CSV\_UseAnalysis\MasterCSV\All\_Glyco\mgf\ptm\UC18ERLIC\_PTM\_35D.mgf

Click mouse within plot area to zoom in by factor of two about that point

Or, to Da

Label all possible matches Label matches used for scoring

Show Y-axis

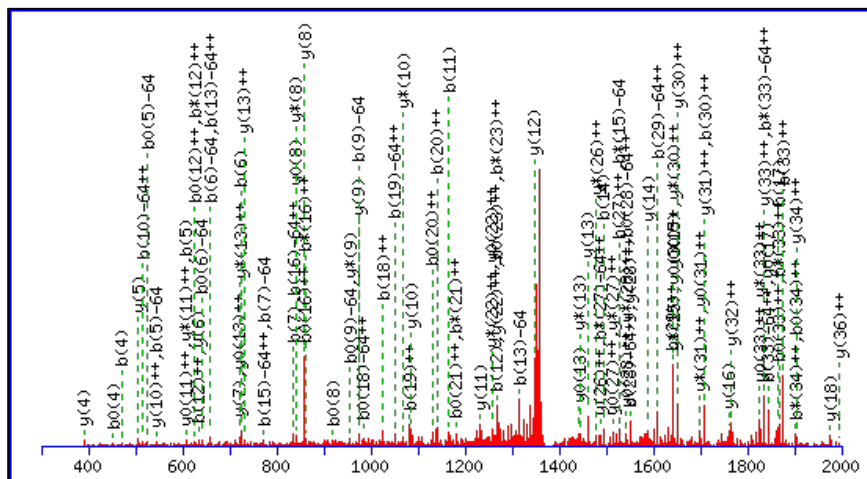

Monoisotopic mass of neutral peptide Mr(calc): 4138.0317

Fixed modifications: Carbamidomethyl (C) (apply to specified residues or termini only)

Variable modifications:

M1 : Oxidation (M), with neutral losses 0.0000 (shown in table), 63.9983

N6 : Deamidated (NQ)

Q17 : Deamidated (NQ)

N29 : Deamidated (NQ)

N33 : Deamidated (NQ)

Ions Score: 92 Expect: 1.4e-007

Matches : 102/616 fragment ions using 97 most intense peaks ([help](#))

| #  | b         | b <sup>++</sup> | b <sup>*</sup> | b <sup>*++</sup> | b <sup>0</sup> | b <sup>0++</sup> | Seq. | y         | y <sup>++</sup> | y <sup>*</sup> | y <sup>*++</sup> | y <sup>0</sup> | y <sup>0++</sup> | #  |
|----|-----------|-----------------|----------------|------------------|----------------|------------------|------|-----------|-----------------|----------------|------------------|----------------|------------------|----|
| 1  | 148.0427  | 74.5250         |                |                  |                |                  | M    |           |                 |                |                  |                |                  | 37 |
| 2  | 247.1111  | 124.0592        |                |                  |                |                  | V    | 3992.0036 | 1996.5054       | 3974.9771      | 1987.9922        | 3973.9930      | 1987.5002        | 36 |
| 3  | 334.1431  | 167.5752        |                |                  | 316.1326       | 158.5699         | S    | 3892.9352 | 1946.9712       | 3875.9086      | 1938.4580        | 3874.9246      | 1937.9660        | 35 |
| 4  | 471.2020  | 236.1047        |                |                  | 453.1915       | 227.0994         | H    | 3805.9032 | 1903.4552       | 3788.8766      | 1894.9419        | 3787.8926      | 1894.4499        | 34 |
| 5  | 608.2609  | 304.6341        |                |                  | 590.2504       | 295.6288         | H    | 3668.8443 | 1834.9258       | 3651.8177      | 1826.4125        | 3650.8337      | 1825.9205        | 33 |
| 6  | 723.2879  | 362.1476        | 706.2613       | 353.6343         | 705.2773       | 353.1423         | N    | 3531.7853 | 1766.3963       | 3514.7588      | 1757.8830        | 3513.7748      | 1757.3910        | 32 |
| 7  | 836.3719  | 418.6896        | 819.3454       | 410.1763         | 818.3614       | 409.6843         | L    | 3416.7584 | 1708.8828       | 3399.7318      | 1700.3696        | 3398.7478      | 1699.8776        | 31 |
| 8  | 937.4196  | 469.2135        | 920.3931       | 460.7002         | 919.4091       | 460.2082         | T    | 3303.6743 | 1652.3408       | 3286.6478      | 1643.8275        | 3285.6638      | 1643.3355        | 30 |
| 9  | 1038.4673 | 519.7373        | 1021.4408      | 511.2240         | 1020.4567      | 510.7320         | T    | 3202.6267 | 1601.8170       | 3185.6001      | 1593.3037        | 3184.6161      | 1592.8117        | 29 |
| 10 | 1095.4888 | 548.2480        | 1078.4622      | 539.7347         | 1077.4782      | 539.2427         | G    | 3101.5790 | 1551.2931       | 3084.5524      | 1542.7799        | 3083.5684      | 1542.2878        | 28 |
| 11 | 1166.5259 | 583.7666        | 1149.4993      | 575.2533         | 1148.5153      | 574.7613         | A    | 3044.5575 | 1522.7824       | 3027.5310      | 1514.2691        | 3026.5469      | 1513.7771        | 27 |
| 12 | 1267.5736 | 634.2904        | 1250.5470      | 625.7771         | 1249.5630      | 625.2851         | T    | 2973.5204 | 1487.2638       | 2956.4938      | 1478.7506        | 2955.5098      | 1478.2586        | 26 |
| 13 | 1380.6576 | 690.8325        | 1363.6311      | 682.3192         | 1362.6471      | 681.8272         | L    | 2872.4727 | 1436.7400       | 2855.4462      | 1428.2267        | 2854.4622      | 1427.7347        | 25 |
| 14 | 1493.7417 | 747.3745        | 1476.7151      | 738.8612         | 1475.7311      | 738.3692         | I    | 2759.3887 | 1380.1980       | 2742.3621      | 1371.6847        | 2741.3781      | 1371.1927        | 24 |
| 15 | 1607.7846 | 804.3959        | 1590.7581      | 795.8827         | 1589.7741      | 795.3907         | N    | 2646.3046 | 1323.6559       | 2629.2780      | 1315.1427        | 2628.2940      | 1314.6506        | 23 |
| 16 | 1736.8272 | 868.9172        | 1719.8007      | 860.4040         | 1718.8166      | 859.9120         | E    | 2532.2617 | 1266.6345       | 2515.2351      | 1258.1212        | 2514.2511      | 1257.6292        | 22 |
| 17 | 1865.8698 | 933.4385        | 1848.8433      | 924.9253         | 1847.8592      | 924.4333         | Q    | 2403.2191 | 1202.1132       | 2386.1925      | 1193.5999        | 2385.2085      | 1193.1079        | 21 |
| 18 | 2051.9491 | 1026.4782       | 2034.9226      | 1017.9649        | 2033.9386      | 1017.4729        | W    | 2274.1765 | 1137.5919       | 2257.1499      | 1129.0786        | 2256.1659      | 1128.5866        | 20 |
| 19 | 2165.0332 | 1083.0202       | 2148.0066      | 1074.5070        | 2147.0226      | 1074.0149        | L    | 2088.0972 | 1044.5522       | 2071.0706      | 1036.0389        | 2070.0866      | 1035.5469        | 19 |
| 20 | 2278.1172 | 1139.5623       | 2261.0907      | 1131.0490        | 2260.1067      | 1130.5570        | L    | 1975.0131 | 988.0102        | 1957.9865      | 979.4969         | 1957.0025      | 979.0049         | 18 |
| 21 | 2379.1649 | 1190.0861       | 2362.1384      | 1181.5728        | 2361.1544      | 1181.0808        | T    | 1861.9290 | 931.4682        | 1844.9025      | 922.9549         | 1843.9185      | 922.4629         | 17 |

|    |           |           |           |           |           |           |   |           |          |           |          |           |          |    |
|----|-----------|-----------|-----------|-----------|-----------|-----------|---|-----------|----------|-----------|----------|-----------|----------|----|
| 22 | 2480.2126 | 1240.6099 | 2463.1861 | 1232.0967 | 2462.2020 | 1231.6047 | T | 1760.8814 | 880.9443 | 1743.8548 | 872.4310 | 1742.8708 | 871.9390 | 16 |
| 23 | 2551.2497 | 1276.1285 | 2534.2232 | 1267.6152 | 2533.2392 | 1267.1232 | A | 1659.8337 | 830.4205 | 1642.8071 | 821.9072 | 1641.8231 | 821.4152 | 15 |
| 24 | 2679.3447 | 1340.1760 | 2662.3181 | 1331.6627 | 2661.3341 | 1331.1707 | K | 1588.7966 | 794.9019 | 1571.7700 | 786.3886 | 1570.7860 | 785.8966 | 14 |
| 25 | 2793.3876 | 1397.1974 | 2776.3611 | 1388.6842 | 2775.3770 | 1388.1922 | N | 1460.7016 | 730.8544 | 1443.6751 | 722.3412 | 1442.6910 | 721.8492 | 13 |
| 26 | 2906.4717 | 1453.7395 | 2889.4451 | 1445.2262 | 2888.4611 | 1444.7342 | L | 1346.6587 | 673.8330 | 1329.6321 | 665.3197 | 1328.6481 | 664.8277 | 12 |
| 27 | 3053.5401 | 1527.2737 | 3036.5135 | 1518.7604 | 3035.5295 | 1518.2684 | F | 1233.5746 | 617.2909 | 1216.5481 | 608.7777 | 1215.5640 | 608.2857 | 11 |
| 28 | 3166.6242 | 1583.8157 | 3149.5976 | 1575.3024 | 3148.6136 | 1574.8104 | L | 1086.5062 | 543.7567 | 1069.4796 | 535.2435 | 1068.4956 | 534.7515 | 10 |
| 29 | 3281.6511 | 1641.3292 | 3264.6245 | 1632.8159 | 3263.6405 | 1632.3239 | N | 973.4221  | 487.2147 | 956.3956  | 478.7014 | 955.4116  | 478.2094 | 9  |
| 30 | 3418.7100 | 1709.8586 | 3401.6835 | 1701.3454 | 3400.6994 | 1700.8534 | H | 858.3952  | 429.7012 | 841.3686  | 421.1880 | 840.3846  | 420.6959 | 8  |
| 31 | 3505.7420 | 1753.3747 | 3488.7155 | 1744.8614 | 3487.7315 | 1744.3694 | S | 721.3363  | 361.1718 | 704.3097  | 352.6585 | 703.3257  | 352.1665 | 7  |
| 32 | 3634.7846 | 1817.8960 | 3617.7581 | 1809.3827 | 3616.7741 | 1808.8907 | E | 634.3042  | 317.6558 | 617.2777  | 309.1425 | 616.2937  | 308.6505 | 6  |
| 33 | 3749.8116 | 1875.4094 | 3732.7850 | 1866.8961 | 3731.8010 | 1866.4041 | N | 505.2617  | 253.1345 | 488.2351  | 244.6212 | 487.2511  | 244.1292 | 5  |
| 34 | 3820.8487 | 1910.9280 | 3803.8221 | 1902.4147 | 3802.8381 | 1901.9227 | A | 390.2347  | 195.6210 | 373.2082  | 187.1077 | 372.2241  | 186.6157 | 4  |
| 35 | 3921.8964 | 1961.4518 | 3904.8698 | 1952.9385 | 3903.8858 | 1952.4465 | T | 319.1976  | 160.1024 | 302.1710  | 151.5892 | 301.1870  | 151.0972 | 3  |
| 36 | 3992.9335 | 1996.9704 | 3975.9069 | 1988.4571 | 3974.9229 | 1987.9651 | A | 218.1499  | 109.5786 | 201.1234  | 101.0653 |           |          | 2  |
| 37 |           |           |           |           |           |           | K | 147.1128  | 74.0600  | 130.0863  | 65.5468  |           |          | 1  |

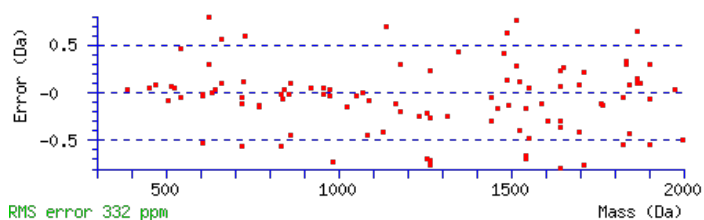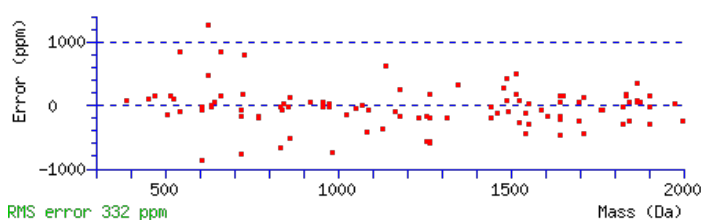

NCBI BLAST search of [MVSHHNLTGATLINEQWLLTTAKNLFNLHSENATAK](#)

(Parameters: blastp, nr protein database, expect=20000, no filter, PAM30)

Other BLAST [web gateways](#)

All matches to this query

| Score | Mr(calc)  | Delta  | Sequence                                             | Site Analysis                       |
|-------|-----------|--------|------------------------------------------------------|-------------------------------------|
| 92.3  | 4138.0317 | 0.0164 | <a href="#">MVSHHNLTGATLINEQWLLTTAKNLFNLHSENATAK</a> | Deamidated N6, Q17, N29, N33 55.51% |
| 90.8  | 4138.0317 | 0.0164 | <a href="#">MVSHHNLTGATLINEQWLLTTAKNLFNLHSENATAK</a> | Deamidated N6, N15, N29, N33 39.39% |
| 88.0  | 4137.0477 | 1.0004 | <a href="#">MVSHHNLTGATLINEQWLLTTAKNLFNLHSENATAK</a> |                                     |
| 80.2  | 4138.0317 | 0.0164 | <a href="#">MVSHHNLTGATLINEQWLLTTAKNLFNLHSENATAK</a> | Deamidated N15, Q17, N29, N33 3.41% |
| 74.6  | 4138.0317 | 0.0164 | <a href="#">MVSHHNLTGATLINEQWLLTTAKNLFNLHSENATAK</a> | Deamidated N6, N25, N29, N33 0.94%  |
| 65.5  | 4138.0317 | 0.0164 | <a href="#">MVSHHNLTGATLINEQWLLTTAKNLFNLHSENATAK</a> | Deamidated Q17, N25, N29, N33 0.12% |
| 65.2  | 4138.0317 | 0.0164 | <a href="#">MVSHHNLTGATLINEQWLLTTAKNLFNLHSENATAK</a> | Deamidated N6, Q17, N25, N33 0.11%  |
| 64.4  | 4138.0317 | 0.0164 | <a href="#">MVSHHNLTGATLINEQWLLTTAKNLFNLHSENATAK</a> | Deamidated N6, N15, N25, N33 0.09%  |
| 64.3  | 4138.0317 | 0.0164 | <a href="#">MVSHHNLTGATLINEQWLLTTAKNLFNLHSENATAK</a> | Deamidated N15, N25, N29, N33 0.09% |
| 62.7  | 4137.0477 | 1.0004 | <a href="#">MVSHHNLTGATLINEQWLLTTAKNLFNLHSENATAK</a> |                                     |

Mascot: <http://www.matrixscience.com/>

# MATRIX SCIENCE Mascot Search Results

## Peptide View

MS/MS Fragmentation of **MVSHHNLTTGATLINEQWLLTTAKNLFNLHSEENATAK**

Found in **J3QR68** in **con\_Xuniprot\_HUMAN3**, J3QR68\_HUMAN Haptoglobin (Fragment) OS=Homo sapiens GN=HP PE=3 SV=1

Match to Query 28567: 4121.086336 from(1031.278860,4+) intensity(31891.4316) rtinseconds(2519) scans(6618) index(22799)

Title: 111019\_Est\_MI\_YS\_G\_03Spectrum5803\_scans\_\_6618

Data file C:\mascot\20140703\_Tmgf\_1D\CSV\_UseAnalysis\MasterCSV\All\_Glyco\mgf\ptm\UC18ERLIC\_PTM\_35D.mgf

Click mouse within plot area to zoom in by factor of two about that point

Or, to Da

Label all possible matches Label matches used for scoring

Show Y-axis

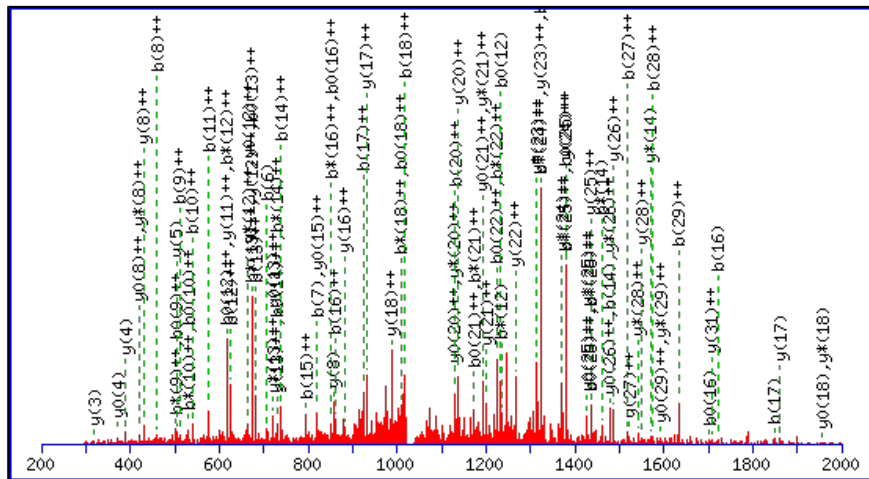

Monoisotopic mass of neutral peptide Mr(calc): 4120.0687

Fixed modifications: Carbamidomethyl (C) (apply to specified residues or termini only)

Variable modifications:

N6 : Deamidated (NQ)

N29 : Deamidated (NQ)

Ions Score: 91 Expect: 1.4e-007

Matches : 95/414 fragment ions using 120 most intense peaks ([help](#))

| #  | b                | b <sup>++</sup>  | b <sup>*</sup>   | b <sup>*++</sup> | b <sup>0</sup>   | b <sup>0++</sup> | Seq. | y                | y <sup>++</sup>  | y <sup>*</sup>   | y <sup>*++</sup> | y <sup>0</sup>   | y <sup>0++</sup> | #  |
|----|------------------|------------------|------------------|------------------|------------------|------------------|------|------------------|------------------|------------------|------------------|------------------|------------------|----|
| 1  | 132.0478         | 66.5275          |                  |                  |                  |                  | M    |                  |                  |                  |                  |                  |                  | 37 |
| 2  | 231.1162         | 116.0617         |                  |                  |                  |                  | V    | 3990.0356        | 1995.5214        | 3973.0090        | 1987.0081        | 3972.0250        | 1986.5161        | 36 |
| 3  | 318.1482         | 159.5777         |                  |                  | 300.1376         | 150.5725         | S    | 3890.9672        | 1945.9872        | 3873.9406        | 1937.4739        | 3872.9566        | 1936.9819        | 35 |
| 4  | 455.2071         | 228.1072         |                  |                  | 437.1966         | 219.1019         | H    | 3803.9351        | 1902.4712        | 3786.9086        | 1893.9579        | 3785.9246        | 1893.4659        | 34 |
| 5  | 592.2660         | 296.6367         |                  |                  | 574.2555         | 287.6314         | H    | 3666.8762        | 1833.9417        | 3649.8497        | 1825.4285        | 3648.8657        | 1824.9365        | 33 |
| 6  | <b>707.2930</b>  | 354.1501         | 690.2664         | 345.6368         | 689.2824         | 345.1448         | N    | 3529.8173        | 1765.4123        | 3512.7908        | 1756.8990        | 3511.8067        | 1756.4070        | 32 |
| 7  | <b>820.3770</b>  | 410.6922         | 803.3505         | 402.1789         | 802.3665         | 401.6869         | L    | 3414.7904        | <b>1707.8988</b> | 3397.7638        | 1699.3855        | 3396.7798        | 1698.8935        | 31 |
| 8  | 921.4247         | <b>461.2160</b>  | 904.3982         | 452.7027         | 903.4141         | 452.2107         | T    | 3301.7063        | 1651.3568        | 3284.6798        | 1642.8435        | 3283.6957        | 1642.3515        | 30 |
| 9  | 1022.4724        | <b>511.7398</b>  | 1005.4458        | <b>503.2266</b>  | 1004.4618        | <b>502.7346</b>  | T    | 3200.6586        | 1600.8329        | 3183.6321        | <b>1592.3197</b> | 3182.6481        | <b>1591.8277</b> | 29 |
| 10 | 1079.4939        | <b>540.2506</b>  | 1062.4673        | <b>531.7373</b>  | 1061.4833        | <b>531.2453</b>  | G    | 3099.6109        | <b>1550.3091</b> | 3082.5844        | <b>1541.7958</b> | 3081.6004        | 1541.3038        | 28 |
| 11 | 1150.5310        | <b>575.7691</b>  | 1133.5044        | 567.2558         | 1132.5204        | 566.7638         | A    | 3042.5895        | <b>1521.7984</b> | 3025.5629        | 1513.2851        | 3024.5789        | 1512.7931        | 27 |
| 12 | 1251.5786        | <b>626.2930</b>  | <b>1234.5521</b> | <b>617.7797</b>  | <b>1233.5681</b> | <b>617.2877</b>  | T    | 2971.5524        | <b>1486.2798</b> | 2954.5258        | <b>1477.7665</b> | 2953.5418        | <b>1477.2745</b> | 26 |
| 13 | 1364.6627        | <b>682.8350</b>  | 1347.6362        | <b>674.3217</b>  | 1346.6521        | <b>673.8297</b>  | L    | 2870.5047        | <b>1435.7560</b> | 2853.4781        | <b>1427.2427</b> | 2852.4941        | <b>1426.7507</b> | 25 |
| 14 | <b>1477.7468</b> | <b>739.3770</b>  | <b>1460.7202</b> | <b>730.8638</b>  | 1459.7362        | <b>730.3717</b>  | I    | 2757.4206        | <b>1379.2139</b> | 2740.3941        | <b>1370.7007</b> | 2739.4101        | 1370.2087        | 24 |
| 15 | 1591.7897        | <b>796.3985</b>  | 1574.7632        | 787.8852         | 1573.7791        | 787.3932         | N    | 2644.3366        | <b>1322.6719</b> | 2627.3100        | <b>1314.1586</b> | 2626.3260        | <b>1313.6666</b> | 23 |
| 16 | <b>1720.8323</b> | <b>860.9198</b>  | 1703.8057        | <b>852.4065</b>  | <b>1702.8217</b> | <b>851.9145</b>  | E    | 2530.2936        | <b>1265.6505</b> | 2513.2671        | 1257.1372        | 2512.2831        | 1256.6452        | 22 |
| 17 | <b>1848.8909</b> | <b>924.9491</b>  | 1831.8643        | 916.4358         | 1830.8803        | 915.9438         | Q    | 2401.2510        | <b>1201.1292</b> | 2384.2245        | <b>1192.6159</b> | 2383.2405        | <b>1192.1239</b> | 21 |
| 18 | 2034.9702        | <b>1017.9887</b> | 2017.9436        | <b>1009.4755</b> | 2016.9596        | <b>1008.9834</b> | W    | 2273.1925        | <b>1137.0999</b> | 2256.1659        | <b>1128.5866</b> | 2255.1819        | <b>1128.0946</b> | 20 |
| 19 | 2148.0543        | 1074.5308        | 2131.0277        | 1066.0175        | 2130.0437        | 1065.5255        | L    | 2087.1131        | 1044.0602        | 2070.0866        | 1035.5469        | 2069.1026        | 1035.0549        | 19 |
| 20 | 2261.1383        | <b>1131.0728</b> | 2244.1118        | 1122.5595        | 2243.1278        | 1122.0675        | L    | 1974.0291        | <b>987.5182</b>  | <b>1957.0025</b> | 979.0049         | <b>1956.0185</b> | 978.5129         | 18 |
| 21 | 2362.1860        | 1181.5966        | 2345.1594        | <b>1173.0834</b> | 2344.1754        | <b>1172.5914</b> | T    | <b>1860.9450</b> | <b>930.9761</b>  | 1843.9185        | 922.4629         | 1842.9345        | 921.9709         | 17 |
| 22 | 2463.2337        | 1232.1205        | 2446.2071        | <b>1223.6072</b> | 2445.2231        | <b>1223.1152</b> | T    | 1759.8973        | <b>880.4523</b>  | 1742.8708        | 871.9390         | 1741.8868        | 871.4470         | 16 |

|    |           |           |           |           |           |           |   |           |          |           |          |           |          |    |
|----|-----------|-----------|-----------|-----------|-----------|-----------|---|-----------|----------|-----------|----------|-----------|----------|----|
| 23 | 2534.2708 | 1267.6390 | 2517.2442 | 1259.1258 | 2516.2602 | 1258.6337 | A | 1658.8497 | 829.9285 | 1641.8231 | 821.4152 | 1640.8391 | 820.9232 | 15 |
| 24 | 2662.3658 | 1331.6865 | 2645.3392 | 1323.1732 | 2644.3552 | 1322.6812 | K | 1587.8125 | 794.4099 | 1570.7860 | 785.8966 | 1569.8020 | 785.4046 | 14 |
| 25 | 2776.4087 | 1388.7080 | 2759.3821 | 1380.1947 | 2758.3981 | 1379.7027 | N | 1459.7176 | 730.3624 | 1442.6910 | 721.8492 | 1441.7070 | 721.3571 | 13 |
| 26 | 2889.4927 | 1445.2500 | 2872.4662 | 1436.7367 | 2871.4822 | 1436.2447 | L | 1345.6747 | 673.3410 | 1328.6481 | 664.8277 | 1327.6641 | 664.3357 | 12 |
| 27 | 3036.5612 | 1518.7842 | 3019.5346 | 1510.2709 | 3018.5506 | 1509.7789 | F | 1232.5906 | 616.7989 | 1215.5640 | 608.2857 | 1214.5800 | 607.7937 | 11 |
| 28 | 3149.6452 | 1575.3262 | 3132.6187 | 1566.8130 | 3131.6347 | 1566.3210 | L | 1085.5222 | 543.2647 | 1068.4956 | 534.7515 | 1067.5116 | 534.2594 | 10 |
| 29 | 3264.6722 | 1632.8397 | 3247.6456 | 1624.3264 | 3246.6616 | 1623.8344 | N | 972.4381  | 486.7227 | 955.4116  | 478.2094 | 954.4275  | 477.7174 | 9  |
| 30 | 3401.7311 | 1701.3692 | 3384.7045 | 1692.8559 | 3383.7205 | 1692.3639 | H | 857.4112  | 429.2092 | 840.3846  | 420.6959 | 839.4006  | 420.2039 | 8  |
| 31 | 3488.7631 | 1744.8852 | 3471.7366 | 1736.3719 | 3470.7525 | 1735.8799 | S | 720.3523  | 360.6798 | 703.3257  | 352.1665 | 702.3417  | 351.6745 | 7  |
| 32 | 3617.8057 | 1809.4065 | 3600.7791 | 1800.8932 | 3599.7951 | 1800.4012 | E | 633.3202  | 317.1638 | 616.2937  | 308.6505 | 615.3097  | 308.1585 | 6  |
| 33 | 3731.8486 | 1866.4279 | 3714.8221 | 1857.9147 | 3713.8381 | 1857.4227 | N | 504.2776  | 252.6425 | 487.2511  | 244.1292 | 486.2671  | 243.6372 | 5  |
| 34 | 3802.8857 | 1901.9465 | 3785.8592 | 1893.4332 | 3784.8752 | 1892.9412 | A | 390.2347  | 195.6210 | 373.2082  | 187.1077 | 372.2241  | 186.6157 | 4  |
| 35 | 3903.9334 | 1952.4703 | 3886.9069 | 1943.9571 | 3885.9229 | 1943.4651 | T | 319.1976  | 160.1024 | 302.1710  | 151.5892 | 301.1870  | 151.0972 | 3  |
| 36 | 3974.9705 | 1987.9889 | 3957.9440 | 1979.4756 | 3956.9600 | 1978.9836 | A | 218.1499  | 109.5786 | 201.1234  | 101.0653 |           |          | 2  |
| 37 |           |           |           |           |           |           | K | 147.1128  | 74.0600  | 130.0863  | 65.5468  |           |          | 1  |

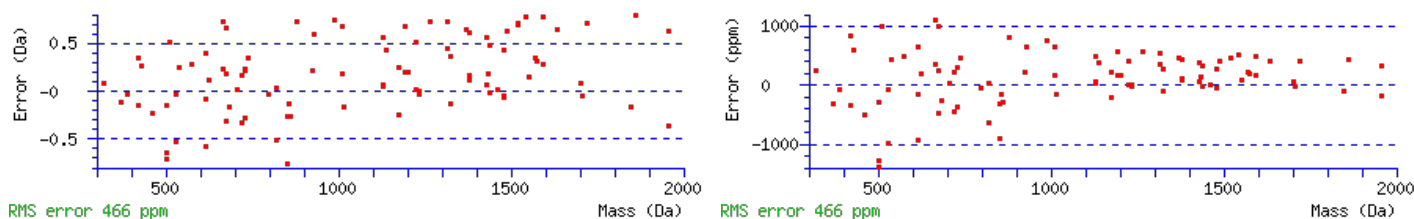

NCBI BLAST search of [MVSHHNLTGATLINEQWLLTTAKNLFNHSENATAK](#)

(Parameters: blastp, nr protein database, expect=20000, no filter, PAM30)

Other BLAST [web gateways](#)

All matches to this query

| Score | Mr(calc)  | Delta  | Sequence                                            | Site Analysis              |
|-------|-----------|--------|-----------------------------------------------------|----------------------------|
| 90.8  | 4120.0687 | 1.0176 | <a href="#">MVSHHNLTGATLINEQWLLTTAKNLFNHSENATAK</a> | Deamidated N6, N29 27.82%  |
| 90.8  | 4120.0687 | 1.0176 | <a href="#">MVSHHNLTGATLINEQWLLTTAKNLFNHSENATAK</a> | Deamidated N6, N33 27.50%  |
| 89.0  | 4120.0687 | 1.0176 | <a href="#">MVSHHNLTGATLINEQWLLTTAKNLFNHSENATAK</a> | Deamidated N25, N33 18.29% |
| 87.5  | 4120.0687 | 1.0176 | <a href="#">MVSHHNLTGATLINEQWLLTTAKNLFNHSENATAK</a> | Deamidated N25, N29 13.10% |
| 81.1  | 4120.0687 | 1.0176 | <a href="#">MVSHHNLTGATLINEQWLLTTAKNLFNHSENATAK</a> | Deamidated N29, N33 2.96%  |
| 80.4  | 4120.0687 | 1.0176 | <a href="#">MVSHHNLTGATLINEQWLLTTAKNLFNHSENATAK</a> | Deamidated Q17, N33 2.54%  |
| 79.0  | 4120.0687 | 1.0176 | <a href="#">MVSHHNLTGATLINEQWLLTTAKNLFNHSENATAK</a> | Deamidated N15, N33 1.85%  |
| 78.7  | 4120.0687 | 1.0176 | <a href="#">MVSHHNLTGATLINEQWLLTTAKNLFNHSENATAK</a> | Deamidated N6, N25 1.72%   |
| 76.7  | 4120.0687 | 1.0176 | <a href="#">MVSHHNLTGATLINEQWLLTTAKNLFNHSENATAK</a> | Deamidated Q17, N29 1.07%  |
| 74.4  | 4120.0687 | 1.0176 | <a href="#">MVSHHNLTGATLINEQWLLTTAKNLFNHSENATAK</a> | Deamidated N15, N29 0.63%  |

Mascot: <http://www.matrixscience.com/>

# MATRIX SCIENCE Mascot Search Results

## Peptide View

MS/MS Fragmentation of **MVSHHNLTTGATLINEQWLLTTAKNLFNLHSEENATAK**

Found in **J3QR68** in **con\_Xuniprot\_HUMAN3**, J3QR68\_HUMAN Haptoglobin (Fragment) OS=Homo sapiens GN=HP PE=3 SV=1

Match to Query 28926: 4138.030616 from(1035.514930,4+) intensity(16521.1426) rtinseconds(2670) scans(7077) index(19929)

Title: 111019\_Est\_MI\_YP\_G\_09Spectrum6280\_scans\_7077

Data file C:\mascot\20140703\_Tmgf\_1D\CSV\_UseAnalysis\MasterCSV\All\_Glyco\mgf\ptm\UC18ERLIC\_PTM\_35D.mgf

Click mouse within plot area to zoom in by factor of two about that point

Or, to Da

Label all possible matches Label matches used for scoring

Show Y-axis

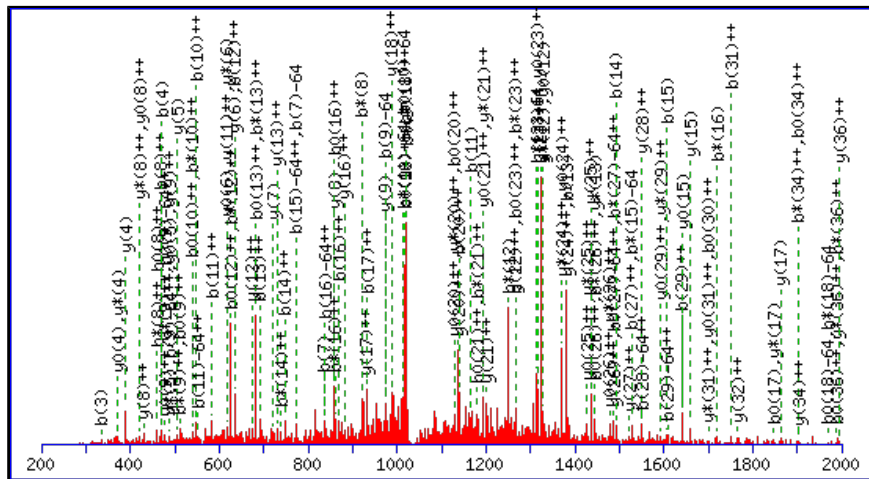

Monoisotopic mass of neutral peptide Mr(calc): 4138.0317

Fixed modifications: Carbamidomethyl (C) (apply to specified residues or termini only)

Variable modifications:

M1 : Oxidation (M), with neutral losses 0.0000 (shown in table), 63.9983

N6 : Deamidated (NQ)

N25 : Deamidated (NQ)

N29 : Deamidated (NQ)

N33 : Deamidated (NQ)

Ions Score: 90 Expect: 2.6e-007

Matches : 130/616 fragment ions using 174 most intense peaks (help)

| #  | b         | b <sup>++</sup> | b <sup>*</sup> | b <sup>*++</sup> | b <sup>0</sup> | b <sup>0++</sup> | Seq. | y         | y <sup>++</sup> | y <sup>*</sup> | y <sup>*++</sup> | y <sup>0</sup> | y <sup>0++</sup> | #  |
|----|-----------|-----------------|----------------|------------------|----------------|------------------|------|-----------|-----------------|----------------|------------------|----------------|------------------|----|
| 1  | 148.0427  | 74.5250         |                |                  |                |                  | M    |           |                 |                |                  |                |                  | 37 |
| 2  | 247.1111  | 124.0592        |                |                  |                |                  | V    | 3992.0036 | 1996.5054       | 3974.9771      | 1987.9922        | 3973.9930      | 1987.5002        | 36 |
| 3  | 334.1431  | 167.5752        |                |                  | 316.1326       | 158.5699         | S    | 3892.9352 | 1946.9712       | 3875.9086      | 1938.4580        | 3874.9246      | 1937.9660        | 35 |
| 4  | 471.2020  | 236.1047        |                |                  | 453.1915       | 227.0994         | H    | 3805.9032 | 1903.4552       | 3788.8766      | 1894.9419        | 3787.8926      | 1894.4499        | 34 |
| 5  | 608.2609  | 304.6341        |                |                  | 590.2504       | 295.6288         | H    | 3668.8443 | 1834.9258       | 3651.8177      | 1826.4125        | 3650.8337      | 1825.9205        | 33 |
| 6  | 723.2879  | 362.1476        | 706.2613       | 353.6343         | 705.2773       | 353.1423         | N    | 3531.7853 | 1766.3963       | 3514.7588      | 1757.8830        | 3513.7748      | 1757.3910        | 32 |
| 7  | 836.3719  | 418.6896        | 819.3454       | 410.1763         | 818.3614       | 409.6843         | L    | 3416.7584 | 1708.8828       | 3399.7318      | 1700.3696        | 3398.7478      | 1699.8776        | 31 |
| 8  | 937.4196  | 469.2135        | 920.3931       | 460.7002         | 919.4091       | 460.2082         | T    | 3303.6743 | 1652.3408       | 3286.6478      | 1643.8275        | 3285.6638      | 1643.3355        | 30 |
| 9  | 1038.4673 | 519.7373        | 1021.4408      | 511.2240         | 1020.4567      | 510.7320         | T    | 3202.6267 | 1601.8170       | 3185.6001      | 1593.3037        | 3184.6161      | 1592.8117        | 29 |
| 10 | 1095.4888 | 548.2480        | 1078.4622      | 539.7347         | 1077.4782      | 539.2427         | G    | 3101.5790 | 1551.2931       | 3084.5524      | 1542.7799        | 3083.5684      | 1542.2878        | 28 |
| 11 | 1166.5259 | 583.7666        | 1149.4993      | 575.2533         | 1148.5153      | 574.7613         | A    | 3044.5575 | 1522.7824       | 3027.5310      | 1514.2691        | 3026.5469      | 1513.7771        | 27 |
| 12 | 1267.5736 | 634.2904        | 1250.5470      | 625.7771         | 1249.5630      | 625.2851         | T    | 2973.5204 | 1487.2638       | 2956.4938      | 1478.7506        | 2955.5098      | 1478.2586        | 26 |
| 13 | 1380.6576 | 690.8325        | 1363.6311      | 682.3192         | 1362.6471      | 681.8272         | L    | 2872.4727 | 1436.7400       | 2855.4462      | 1428.2267        | 2854.4622      | 1427.7347        | 25 |
| 14 | 1493.7417 | 747.3745        | 1476.7151      | 738.8612         | 1475.7311      | 738.3692         | I    | 2759.3887 | 1380.1980       | 2742.3621      | 1371.6847        | 2741.3781      | 1371.1927        | 24 |
| 15 | 1607.7846 | 804.3959        | 1590.7581      | 795.8827         | 1589.7741      | 795.3907         | N    | 2646.3046 | 1323.6559       | 2629.2780      | 1315.1427        | 2628.2940      | 1314.6506        | 23 |
| 16 | 1736.8272 | 868.9172        | 1719.8007      | 860.4040         | 1718.8166      | 859.9120         | E    | 2532.2617 | 1266.6345       | 2515.2351      | 1258.1212        | 2514.2511      | 1257.6292        | 22 |
| 17 | 1864.8858 | 932.9465        | 1847.8592      | 924.4333         | 1846.8752      | 923.9413         | Q    | 2403.2191 | 1202.1132       | 2386.1925      | 1193.5999        | 2385.2085      | 1193.1079        | 21 |
| 18 | 2050.9651 | 1025.9862       | 2033.9386      | 1017.4729        | 2032.9545      | 1016.9809        | W    | 2275.1605 | 1138.0839       | 2258.1339      | 1129.5706        | 2257.1499      | 1129.0786        | 20 |
| 19 | 2164.0492 | 1082.5282       | 2147.0226      | 1074.0149        | 2146.0386      | 1073.5229        | L    | 2089.0812 | 1045.0442       | 2072.0546      | 1036.5310        | 2071.0706      | 1036.0389        | 19 |
| 20 | 2277.1332 | 1139.0703       | 2260.1067      | 1130.5570        | 2259.1227      | 1130.0650        | L    | 1975.9971 | 988.5022        | 1958.9706      | 979.9889         | 1957.9865      | 979.4969         | 18 |
| 21 | 2378.1809 | 1189.5941       | 2361.1544      | 1181.0808        | 2360.1703      | 1180.5888        | T    | 1862.9130 | 931.9602        | 1845.8865      | 923.4469         | 1844.9025      | 922.9549         | 17 |



|    |           |           |           |           |           |           |   |           |          |           |          |           |          |    |
|----|-----------|-----------|-----------|-----------|-----------|-----------|---|-----------|----------|-----------|----------|-----------|----------|----|
| 22 | 2479.2286 | 1240.1179 | 2462.2020 | 1231.6047 | 2461.2180 | 1231.1126 | T | 1761.8654 | 881.4363 | 1744.8388 | 872.9230 | 1743.8548 | 872.4310 | 16 |
| 23 | 2550.2657 | 1275.6365 | 2533.2392 | 1267.1232 | 2532.2551 | 1266.6312 | A | 1660.8177 | 830.9125 | 1643.7911 | 822.3992 | 1642.8071 | 821.9072 | 15 |
| 24 | 2678.3607 | 1339.6840 | 2661.3341 | 1331.1707 | 2660.3501 | 1330.6787 | K | 1589.7806 | 795.3939 | 1572.7540 | 786.8807 | 1571.7700 | 786.3886 | 14 |
| 25 | 2793.3876 | 1397.1974 | 2776.3611 | 1388.6842 | 2775.3770 | 1388.1922 | N | 1461.6856 | 731.3464 | 1444.6591 | 722.8332 | 1443.6751 | 722.3412 | 13 |
| 26 | 2906.4717 | 1453.7395 | 2889.4451 | 1445.2262 | 2888.4611 | 1444.7342 | L | 1346.6587 | 673.8330 | 1329.6321 | 665.3197 | 1328.6481 | 664.8277 | 12 |
| 27 | 3053.5401 | 1527.2737 | 3036.5135 | 1518.7604 | 3035.5295 | 1518.2684 | F | 1233.5746 | 617.2909 | 1216.5481 | 608.7777 | 1215.5640 | 608.2857 | 11 |
| 28 | 3166.6242 | 1583.8157 | 3149.5976 | 1575.3024 | 3148.6136 | 1574.8104 | L | 1086.5062 | 543.7567 | 1069.4796 | 535.2435 | 1068.4956 | 534.7515 | 10 |
| 29 | 3281.6511 | 1641.3292 | 3264.6245 | 1632.8159 | 3263.6405 | 1632.3239 | N | 973.4221  | 487.2147 | 956.3956  | 478.7014 | 955.4116  | 478.2094 | 9  |
| 30 | 3418.7100 | 1709.8586 | 3401.6835 | 1701.3454 | 3400.6994 | 1700.8534 | H | 858.3952  | 429.7012 | 841.3686  | 421.1880 | 840.3846  | 420.6959 | 8  |
| 31 | 3505.7420 | 1753.3747 | 3488.7155 | 1744.8614 | 3487.7315 | 1744.3694 | S | 721.3363  | 361.1718 | 704.3097  | 352.6585 | 703.3257  | 352.1665 | 7  |
| 32 | 3634.7846 | 1817.8960 | 3617.7581 | 1809.3827 | 3616.7741 | 1808.8907 | E | 634.3042  | 317.6558 | 617.2777  | 309.1425 | 616.2937  | 308.6505 | 6  |
| 33 | 3749.8116 | 1875.4094 | 3732.7850 | 1866.8961 | 3731.8010 | 1866.4041 | N | 505.2617  | 253.1345 | 488.2351  | 244.6212 | 487.2511  | 244.1292 | 5  |
| 34 | 3820.8487 | 1910.9280 | 3803.8221 | 1902.4147 | 3802.8381 | 1901.9227 | A | 390.2347  | 195.6210 | 373.2082  | 187.1077 | 372.2241  | 186.6157 | 4  |
| 35 | 3921.8964 | 1961.4518 | 3904.8698 | 1952.9385 | 3903.8858 | 1952.4465 | T | 319.1976  | 160.1024 | 302.1710  | 151.5892 | 301.1870  | 151.0972 | 3  |
| 36 | 3992.9335 | 1996.9704 | 3975.9069 | 1988.4571 | 3974.9229 | 1987.9651 | A | 218.1499  | 109.5786 | 201.1234  | 101.0653 |           |          | 2  |
| 37 |           |           |           |           |           |           | K | 147.1128  | 74.0600  | 130.0863  | 65.5468  |           |          | 1  |

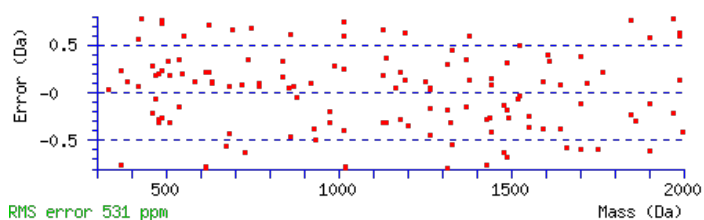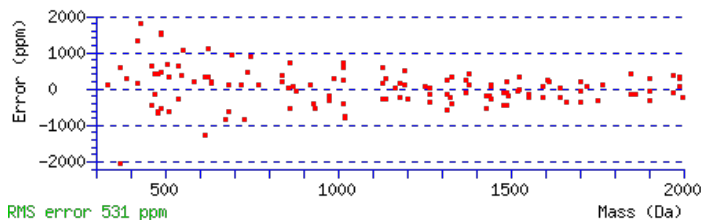

NCBI BLAST search of [MVSHHNLTTGATLINEQWLLTTAKNLFNLHSENATAK](#)

(Parameters: blastp, nr protein database, expect=20000, no filter, PAM30)

Other BLAST [web gateways](#)

All matches to this query

| Score | Mr(calc)  | Delta   | Sequence                                              | Site Analysis                       |
|-------|-----------|---------|-------------------------------------------------------|-------------------------------------|
| 89.7  | 4138.0317 | -0.0010 | <a href="#">MVSHHNLTTGATLINEQWLLTTAKNLFNLHSENATAK</a> | Deamidated N6, N25, N29, N33 25.36% |
| 89.7  | 4138.0317 | -0.0010 | <a href="#">MVSHHNLTTGATLINEQWLLTTAKNLFNLHSENATAK</a> | Deamidated N6, Q17, N29, N33 25.07% |
| 88.8  | 4138.0317 | -0.0010 | <a href="#">MVSHHNLTTGATLINEQWLLTTAKNLFNLHSENATAK</a> | Deamidated N6, N15, N29, N33 20.62% |
| 83.6  | 4138.0317 | -0.0010 | <a href="#">MVSHHNLTTGATLINEQWLLTTAKNLFNLHSENATAK</a> | Deamidated N15, N25, N29, N33 6.24% |
| 83.5  | 4138.0317 | -0.0010 | <a href="#">MVSHHNLTTGATLINEQWLLTTAKNLFNLHSENATAK</a> | Deamidated N15, Q17, N29, N33 6.15% |
| 83.0  | 4138.0317 | -0.0010 | <a href="#">MVSHHNLTTGATLINEQWLLTTAKNLFNLHSENATAK</a> | Deamidated N6, Q17, N25, N33 5.47%  |
| 82.2  | 4138.0317 | -0.0010 | <a href="#">MVSHHNLTTGATLINEQWLLTTAKNLFNLHSENATAK</a> | Deamidated N6, N15, N25, N33 4.54%  |
| 81.4  | 4137.0477 | 0.9830  | <a href="#">MVSHHNLTTGATLINEQWLLTTAKNLFNLHSENATAK</a> |                                     |
| 77.3  | 4138.0317 | -0.0010 | <a href="#">MVSHHNLTTGATLINEQWLLTTAKNLFNLHSENATAK</a> | Deamidated N15, Q17, N25, N33 1.44% |
| 75.1  | 4138.0317 | -0.0010 | <a href="#">MVSHHNLTTGATLINEQWLLTTAKNLFNLHSENATAK</a> | Deamidated N6, N15, Q17, N33 0.88%  |

Mascot: <http://www.matrixscience.com/>

# MASCOT SCIENCE Mascot Search Results

## Peptide View

MS/MS Fragmentation of **VVLHPNYSQVDIGLIK**K

Found in **H3BS21** in **con\_Xuniprot\_HUMAN3**, H3BS21\_HUMAN Haptoglobin (Fragment) OS=Homo sapiens GN=HP PE=2 SV=1

Match to Query 13004: 2036.172732 from(679.731520,3+) intensity(383838.8750) rtinseconds(1690) scans(4256) index(9516)

Title: 111019\_Est\_ISCardio\_NMI\_YS\_G\_5Spectrum3641\_scans\_\_4256

Data file C:\mascot\20140703\_Tmgf\_1D\CSV\_UseAnalysis\MasterCSV\All\_Glyco\mgf\ptm\UC18ERLIC\_PTM\_35D.mgf

Click mouse within plot area to zoom in by factor of two about that point

Or, to Da

Label all possible matches Label matches used for scoring

Show Y-axis

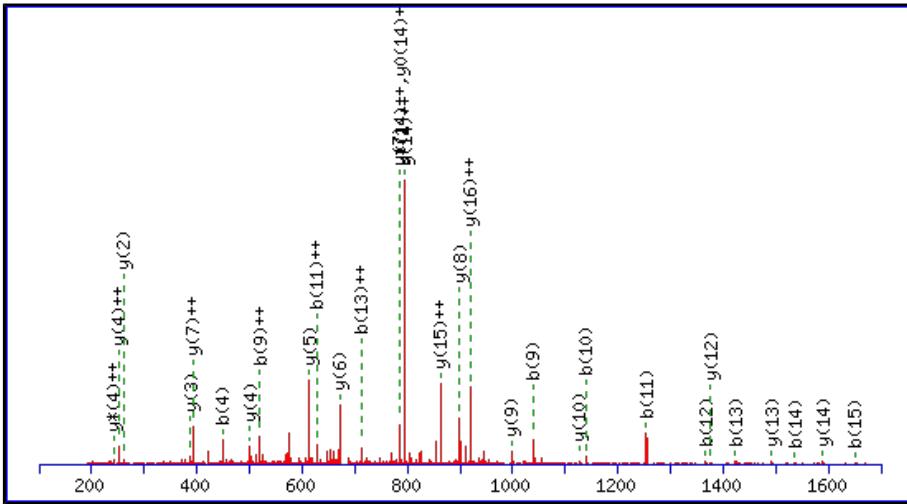

Monoisotopic mass of neutral peptide Mr(calc): 2036.1670

Fixed modifications: Carbamidomethyl (C) (apply to specified residues or termini only)

Variable modifications:

N6 : Deamidated (NQ)

Ions Score: 88 Expect: 4.8e-008

Matches : 31/166 fragment ions using 45 most intense peaks ([help](#))

| #  | b         | b <sup>++</sup> | b <sup>*</sup> | b <sup>*++</sup> | b <sup>0</sup> | b <sup>0++</sup> | Seq. | y         | y <sup>++</sup> | y <sup>*</sup> | y <sup>*++</sup> | y <sup>0</sup> | y <sup>0++</sup> | #  |
|----|-----------|-----------------|----------------|------------------|----------------|------------------|------|-----------|-----------------|----------------|------------------|----------------|------------------|----|
| 1  | 100.0757  | 50.5415         |                |                  |                |                  | V    |           |                 |                |                  |                |                  | 18 |
| 2  | 199.1441  | 100.0757        |                |                  |                |                  | V    | 1938.1059 | 969.5566        | 1921.0793      | 961.0433         | 1920.0953      | 960.5513         | 17 |
| 3  | 312.2282  | 156.6177        |                |                  |                |                  | L    | 1839.0375 | 920.0224        | 1822.0109      | 911.5091         | 1821.0269      | 911.0171         | 16 |
| 4  | 449.2871  | 225.1472        |                |                  |                |                  | H    | 1725.9534 | 863.4803        | 1708.9268      | 854.9671         | 1707.9428      | 854.4751         | 15 |
| 5  | 546.3398  | 273.6736        |                |                  |                |                  | P    | 1588.8945 | 794.9509        | 1571.8679      | 786.4376         | 1570.8839      | 785.9456         | 14 |
| 6  | 661.3668  | 331.1870        | 644.3402       | 322.6738         |                |                  | N    | 1491.8417 | 746.4245        | 1474.8152      | 737.9112         | 1473.8312      | 737.4192         | 13 |
| 7  | 824.4301  | 412.7187        | 807.4036       | 404.2054         |                |                  | Y    | 1376.8148 | 688.9110        | 1359.7882      | 680.3978         | 1358.8042      | 679.9057         | 12 |
| 8  | 911.4621  | 456.2347        | 894.4356       | 447.7214         | 893.4516       | 447.2294         | S    | 1213.7514 | 607.3794        | 1196.7249      | 598.8661         | 1195.7409      | 598.3741         | 11 |
| 9  | 1039.5207 | 520.2640        | 1022.4942      | 511.7507         | 1021.5102      | 511.2587         | Q    | 1126.7194 | 563.8633        | 1109.6929      | 555.3501         | 1108.7089      | 554.8581         | 10 |
| 10 | 1138.5891 | 569.7982        | 1121.5626      | 561.2849         | 1120.5786      | 560.7929         | V    | 998.6608  | 499.8341        | 981.6343       | 491.3208         | 980.6503       | 490.8288         | 9  |
| 11 | 1253.6161 | 627.3117        | 1236.5895      | 618.7984         | 1235.6055      | 618.3064         | D    | 899.5924  | 450.2999        | 882.5659       | 441.7866         | 881.5819       | 441.2946         | 8  |
| 12 | 1366.7001 | 683.8537        | 1349.6736      | 675.3404         | 1348.6896      | 674.8484         | I    | 784.5655  | 392.7864        | 767.5389       | 384.2731         |                |                  | 7  |
| 13 | 1423.7216 | 712.3644        | 1406.6951      | 703.8512         | 1405.7110      | 703.3592         | G    | 671.4814  | 336.2443        | 654.4549       | 327.7311         |                |                  | 6  |
| 14 | 1536.8057 | 768.9065        | 1519.7791      | 760.3932         | 1518.7951      | 759.9012         | L    | 614.4600  | 307.7336        | 597.4334       | 299.2203         |                |                  | 5  |
| 15 | 1649.8897 | 825.4485        | 1632.8632      | 816.9352         | 1631.8792      | 816.4432         | I    | 501.3759  | 251.1916        | 484.3493       | 242.6783         |                |                  | 4  |
| 16 | 1777.9847 | 889.4960        | 1760.9581      | 880.9827         | 1759.9741      | 880.4907         | K    | 388.2918  | 194.6496        | 371.2653       | 186.1363         |                |                  | 3  |
| 17 | 1891.0688 | 946.0380        | 1874.0422      | 937.5247         | 1873.0582      | 937.0327         | L    | 260.1969  | 130.6021        | 243.1703       | 122.0888         |                |                  | 2  |
| 18 |           |                 |                |                  |                |                  | K    | 147.1128  | 74.0600         | 130.0863       | 65.5468          |                |                  | 1  |



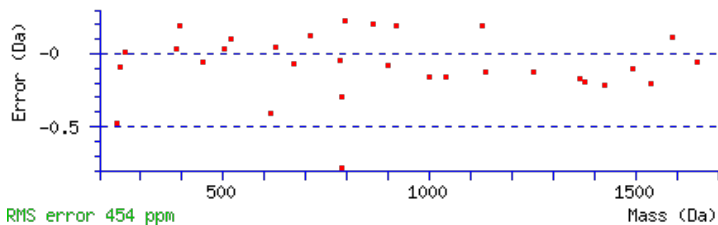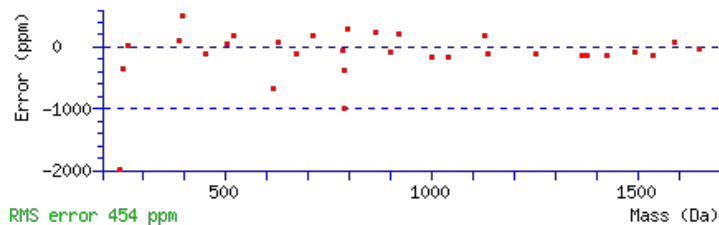

NCBI **BLAST** search of [VVLHPNYSQVDIGLIKLIK](#)

(Parameters: blastp, nr protein database, expect=20000, no filter, PAM30)

Other BLAST [web gateways](#)

**All matches to this query**

| Score | Mr(calc)  | Delta   | Sequence                             | Site Analysis        |
|-------|-----------|---------|--------------------------------------|----------------------|
| 88.5  | 2036.1670 | 0.0057  | <a href="#">VVLHPNYSQVDIGLIKLIK</a>  | Deamidated N6 95.31% |
| 75.4  | 2036.1670 | 0.0057  | <a href="#">VVLHPNYSQVDIGLIKLIK</a>  | Deamidated Q9 4.69%  |
| 12.6  | 2036.1703 | 0.0024  | <a href="#">AKEMGLPVGTAAPIIAAVK</a>  |                      |
| 4.8   | 2034.1698 | 2.0030  | <a href="#">IQLQKAIETLNRLQPNR</a>    |                      |
| 2.4   | 2036.1630 | 0.0098  | <a href="#">QTPSAQLSLIKNGPLTIQK</a>  |                      |
| 1.9   | 2034.1711 | 2.0016  | <a href="#">HLRHLEILQLSRNHIR</a>     |                      |
| 1.6   | 2036.1638 | 0.0089  | <a href="#">GMVPIVLVAKLGPQVMAAAR</a> |                      |
| 1.0   | 2036.1816 | -0.0088 | <a href="#">QDSLGLIAIPRPKMCLK</a>    |                      |

Mascot: <http://www.matrixscience.com/>

# MATRIX SCIENCE Mascot Search Results

## Peptide View

MS/MS Fragmentation of **NLFLNHSENATAK**

Found in **H3BS21** in **con\_Xuniprot\_HUMAN3**, H3BS21\_HUMAN Haptoglobin (Fragment) OS=Homo sapiens GN=HP PE=2 SV=1

Match to Query 4841: 1459.696948 from(730.855750,2+) intensity(5174931.5000) rtinseconds(669) scans(1585) index(23803)

Title: 111019\_Est\_MI\_YS\_G\_05Spectrum1333\_scans\_\_1585

Data file C:\\mascot\\20140703\_Tmgf\_1D\\CSV\_UseAnalysis\\MasterCSV\\All\_Glyco\\mgf\\ptm\\UC18ERLIC\_PTM\_35D.mgf

Click mouse within plot area to zoom in by factor of two about that point

Or, to Da

Label all possible matches Label matches used for scoring

Show Y-axis

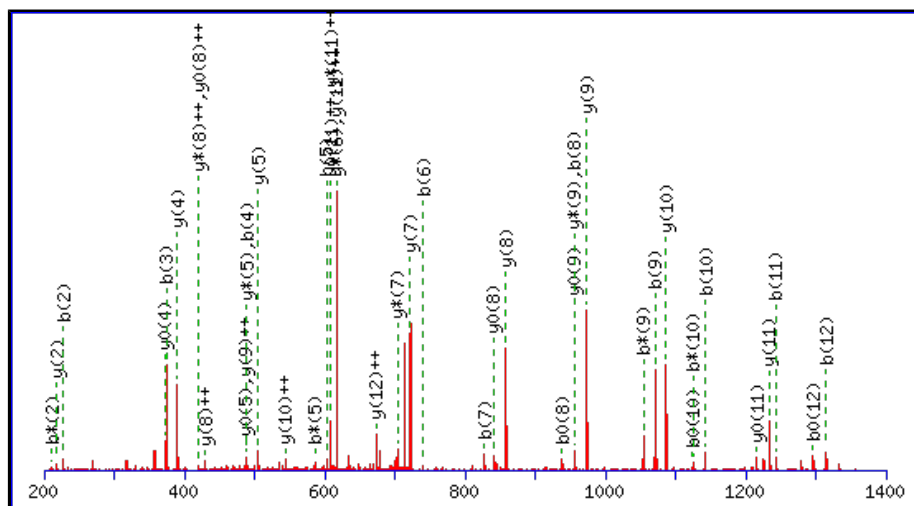

Monoisotopic mass of neutral peptide Mr(calc): 1459.6943

Fixed modifications: Carbamidomethyl (C) (apply to specified residues or termini only)

Variable modifications:

N5 : Deamidated (NQ)

N9 : Deamidated (NQ)

Ions Score: 83 Expect: 7.7e-007

Matches : 44/128 fragment ions using 60 most intense peaks ([help](#))

| #  | b                | b <sup>++</sup> | b <sup>*</sup>   | b <sup>*++</sup> | b <sup>0</sup>   | b <sup>0++</sup> | Seq. | y                | y <sup>++</sup> | y <sup>*</sup>  | y <sup>*++</sup> | y <sup>0</sup>   | y <sup>0++</sup> | #  |
|----|------------------|-----------------|------------------|------------------|------------------|------------------|------|------------------|-----------------|-----------------|------------------|------------------|------------------|----|
| 1  | 115.0502         | 58.0287         | 98.0237          | 49.5155          |                  |                  | N    |                  |                 |                 |                  |                  |                  | 13 |
| 2  | <b>228.1343</b>  | 114.5708        | <b>211.1077</b>  | 106.0575         |                  |                  | L    | 1346.6587        | <b>673.8330</b> | 1329.6321       | 665.3197         | 1328.6481        | 664.8277         | 12 |
| 3  | <b>375.2027</b>  | 188.1050        | 358.1761         | 179.5917         |                  |                  | F    | <b>1233.5746</b> | <b>617.2909</b> | 1216.5481       | <b>608.7777</b>  | <b>1215.5640</b> | <b>608.2857</b>  | 11 |
| 4  | <b>488.2867</b>  | 244.6470        | 471.2602         | 236.1337         |                  |                  | L    | <b>1086.5062</b> | <b>543.7567</b> | 1069.4796       | 535.2435         | 1068.4956        | 534.7515         | 10 |
| 5  | <b>603.3137</b>  | 302.1605        | <b>586.2871</b>  | 293.6472         |                  |                  | N    | <b>973.4221</b>  | <b>487.2147</b> | <b>956.3956</b> | 478.7014         | <b>955.4116</b>  | 478.2094         | 9  |
| 6  | <b>740.3726</b>  | 370.6899        | 723.3461         | 362.1767         |                  |                  | H    | <b>858.3952</b>  | <b>429.7012</b> | 841.3686        | <b>421.1880</b>  | <b>840.3846</b>  | <b>420.6959</b>  | 8  |
| 7  | <b>827.4046</b>  | 414.2060        | 810.3781         | 405.6927         | 809.3941         | 405.2007         | S    | <b>721.3363</b>  | 361.1718        | <b>704.3097</b> | 352.6585         | 703.3257         | 352.1665         | 7  |
| 8  | <b>956.4472</b>  | 478.7272        | 939.4207         | 470.2140         | <b>938.4367</b>  | 469.7220         | E    | 634.3042         | 317.6558        | <b>617.2777</b> | 309.1425         | 616.2937         | 308.6505         | 6  |
| 9  | <b>1071.4742</b> | 536.2407        | <b>1054.4476</b> | 527.7274         | 1053.4636        | 527.2354         | N    | <b>505.2617</b>  | 253.1345        | <b>488.2351</b> | 244.6212         | <b>487.2511</b>  | 244.1292         | 5  |
| 10 | <b>1142.5113</b> | 571.7593        | <b>1125.4847</b> | 563.2460         | <b>1124.5007</b> | 562.7540         | A    | <b>390.2347</b>  | 195.6210        | 373.2082        | 187.1077         | <b>372.2241</b>  | 186.6157         | 4  |
| 11 | <b>1243.5590</b> | 622.2831        | 1226.5324        | 613.7698         | 1225.5484        | 613.2778         | T    | 319.1976         | 160.1024        | 302.1710        | 151.5892         | 301.1870         | 151.0972         | 3  |
| 12 | <b>1314.5961</b> | 657.8017        | 1297.5695        | 649.2884         | <b>1296.5855</b> | 648.7964         | A    | <b>218.1499</b>  | 109.5786        | 201.1234        | 101.0653         |                  |                  | 2  |
| 13 |                  |                 |                  |                  |                  |                  | K    | 147.1128         | 74.0600         | 130.0863        | 65.5468          |                  |                  | 1  |

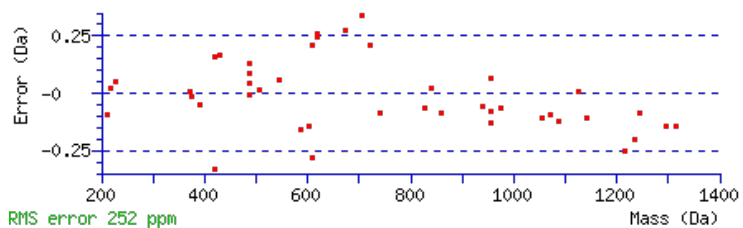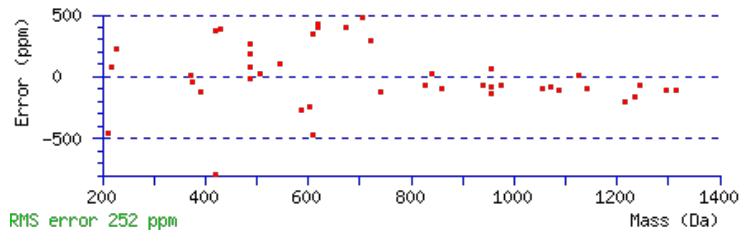

NCBI **BLAST** search of [NLFLNHSENATAK](#)

(Parameters: blastp, nr protein database, expect=20000, no filter, PAM30)

Other BLAST [web gateways](#)

**All matches to this query**

| Score | Mr(calc)  | Delta   | Sequence                      | Site Analysis            |
|-------|-----------|---------|-------------------------------|--------------------------|
| 83.5  | 1459.6943 | 0.0027  | <a href="#">NLFLNHSENATAK</a> | Deamidated N5, N9 99.53% |
| 60.2  | 1459.6943 | 0.0027  | <a href="#">NLFLNHSENATAK</a> | Deamidated N1, N9 0.47%  |
| 33.5  | 1459.6943 | 0.0027  | <a href="#">NLFLNHSENATAK</a> | Deamidated N1, N5 0.00%  |
| 21.4  | 1459.6929 | 0.0040  | <a href="#">VQEQLDEQLVK</a>   |                          |
| 21.2  | 1459.6929 | 0.0040  | <a href="#">LNQNELELENLK</a>  |                          |
| 16.5  | 1459.6985 | -0.0016 | <a href="#">QMLYMKEMRAK</a>   |                          |
| 15.4  | 1459.6929 | 0.0040  | <a href="#">VEEIENELDEIK</a>  |                          |
| 14.5  | 1459.6929 | 0.0040  | <a href="#">IEDLENEIEEVK</a>  |                          |
| 14.0  | 1459.7042 | -0.0072 | <a href="#">INIQNKDIEAGDK</a> |                          |
| 13.9  | 1459.6977 | -0.0007 | <a href="#">NCTEELDLNPKK</a>  |                          |

Mascot: <http://www.matrixscience.com/>

# MATRIX SCIENCE Mascot Search Results

## Peptide View

MS/MS Fragmentation of **MVSHHNLTTGATLINEQWLLTTAKNLFNLHSEENATAK**

Found in **J3QR68** in **con\_Xuniprot\_HUMAN3**, J3QR68\_HUMAN Haptoglobin (Fragment) OS=Homo sapiens GN=HP PE=3 SV=1

Match to Query 28920: 4137.099296 from(1035.282100,4+) intensity(0.0000) rtinseconds(2494) scans(6625) index(16272)

Title: 111019\_Est\_MI\_YP\_G\_05Spectrum5679\_scans\_\_6625

Data file C:\mascot\20140703\_Tmgf\_1D\CSV\_UseAnalysis\MasterCSV\All\_Glyco\mgf\ptm\UC18ERLIC\_PTM\_35D.mgf

Click mouse within plot area to zoom in by factor of two about that point

Or, to Da

Label all possible matches Label matches used for scoring

Show Y-axis

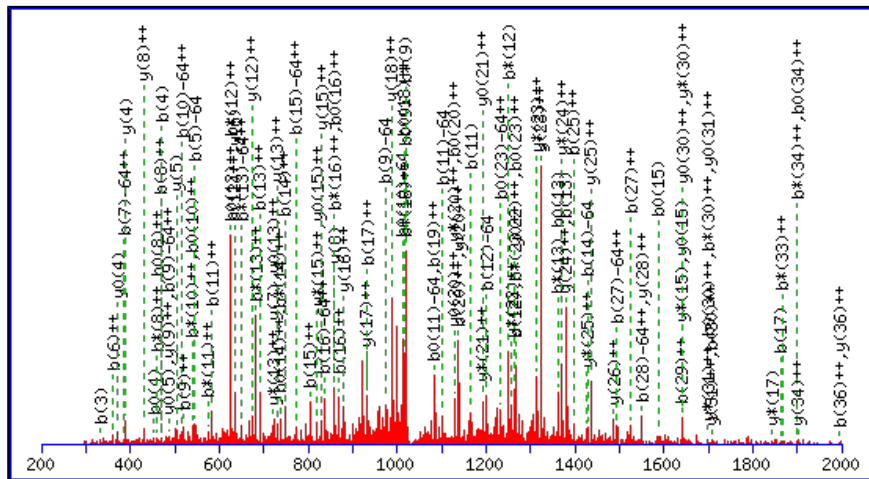

Monoisotopic mass of neutral peptide Mr(calc): 4135.0796

Fixed modifications: Carbamidomethyl (C) (apply to specified residues or termini only)

Variable modifications:

M1 : Oxidation (M), with neutral losses 0.0000 (shown in table), 63.9983

N33 : Deamidated (NQ)

Ions Score: 82 Expect: 1.1e-006

Matches : 112/616 fragment ions using 155 most intense peaks ([help](#))

| #  | b         | b <sup>++</sup> | b <sup>*</sup> | b <sup>*++</sup> | b <sup>0</sup> | b <sup>0++</sup> | Seq. | y         | y <sup>++</sup> | y <sup>*</sup> | y <sup>*++</sup> | y <sup>0</sup> | y <sup>0++</sup> | #  |
|----|-----------|-----------------|----------------|------------------|----------------|------------------|------|-----------|-----------------|----------------|------------------|----------------|------------------|----|
| 1  | 148.0427  | 74.5250         |                |                  |                |                  | M    |           |                 |                |                  |                |                  | 37 |
| 2  | 247.1111  | 124.0592        |                |                  |                |                  | V    | 3989.0516 | 1995.0294       | 3972.0250      | 1986.5161        | 3971.0410      | 1986.0241        | 36 |
| 3  | 334.1431  | 167.5752        |                |                  | 316.1326       | 158.5699         | S    | 3889.9831 | 1945.4952       | 3872.9566      | 1936.9819        | 3871.9726      | 1936.4899        | 35 |
| 4  | 471.2020  | 236.1047        |                |                  | 453.1915       | 227.0994         | H    | 3802.9511 | 1901.9792       | 3785.9246      | 1893.4659        | 3784.9405      | 1892.9739        | 34 |
| 5  | 608.2609  | 304.6341        |                |                  | 590.2504       | 295.6288         | H    | 3665.8922 | 1833.4497       | 3648.8657      | 1824.9365        | 3647.8816      | 1824.4445        | 33 |
| 6  | 722.3039  | 361.6556        | 705.2773       | 353.1423         | 704.2933       | 352.6503         | N    | 3528.8333 | 1764.9203       | 3511.8067      | 1756.4070        | 3510.8227      | 1755.9150        | 32 |
| 7  | 835.3879  | 418.1976        | 818.3614       | 409.6843         | 817.3774       | 409.1923         | L    | 3414.7904 | 1707.8988       | 3397.7638      | 1699.3855        | 3396.7798      | 1698.8935        | 31 |
| 8  | 936.4356  | 468.7214        | 919.4091       | 460.2082         | 918.4250       | 459.7162         | T    | 3301.7063 | 1651.3568       | 3284.6798      | 1642.8435        | 3283.6957      | 1642.3515        | 30 |
| 9  | 1037.4833 | 519.2453        | 1020.4567      | 510.7320         | 1019.4727      | 510.2400         | T    | 3200.6586 | 1600.8329       | 3183.6321      | 1592.3197        | 3182.6481      | 1591.8277        | 29 |
| 10 | 1094.5048 | 547.7560        | 1077.4782      | 539.2427         | 1076.4942      | 538.7507         | G    | 3099.6109 | 1550.3091       | 3082.5844      | 1541.7958        | 3081.6004      | 1541.3038        | 28 |
| 11 | 1165.5419 | 583.2746        | 1148.5153      | 574.7613         | 1147.5313      | 574.2693         | A    | 3042.5895 | 1521.7984       | 3025.5629      | 1513.2851        | 3024.5789      | 1512.7931        | 27 |
| 12 | 1266.5895 | 633.7984        | 1249.5630      | 625.2851         | 1248.5790      | 624.7931         | T    | 2971.5524 | 1486.2798       | 2954.5258      | 1477.7665        | 2953.5418      | 1477.2745        | 26 |
| 13 | 1379.6736 | 690.3404        | 1362.6471      | 681.8272         | 1361.6630      | 681.3352         | L    | 2870.5047 | 1435.7560       | 2853.4781      | 1427.2427        | 2852.4941      | 1426.7507        | 25 |
| 14 | 1492.7577 | 746.8825        | 1475.7311      | 738.3692         | 1474.7471      | 737.8772         | I    | 2757.4206 | 1379.2139       | 2740.3941      | 1370.7007        | 2739.4101      | 1370.2087        | 24 |
| 15 | 1606.8006 | 803.9039        | 1589.7741      | 795.3907         | 1588.7900      | 794.8987         | N    | 2644.3366 | 1322.6719       | 2627.3100      | 1314.1586        | 2626.3260      | 1313.6666        | 23 |
| 16 | 1735.8432 | 868.4252        | 1718.8166      | 859.9120         | 1717.8326      | 859.4200         | E    | 2530.2936 | 1265.6505       | 2513.2671      | 1257.1372        | 2512.2831      | 1256.6452        | 22 |
| 17 | 1863.9018 | 932.4545        | 1846.8752      | 923.9413         | 1845.8912      | 923.4492         | Q    | 2401.2510 | 1201.1292       | 2384.2245      | 1192.6159        | 2383.2405      | 1192.1239        | 21 |
| 18 | 2049.9811 | 1025.4942       | 2032.9545      | 1016.9809        | 2031.9705      | 1016.4889        | W    | 2273.1925 | 1137.0999       | 2256.1659      | 1128.5866        | 2255.1819      | 1128.0946        | 20 |
| 19 | 2163.0652 | 1082.0362       | 2146.0386      | 1073.5229        | 2145.0546      | 1073.0309        | L    | 2087.1131 | 1044.0602       | 2070.0866      | 1035.5469        | 2069.1026      | 1035.0549        | 19 |
| 20 | 2276.1492 | 1138.5782       | 2259.1227      | 1130.0650        | 2258.1386      | 1129.5730        | L    | 1974.0291 | 987.5182        | 1957.0025      | 979.0049         | 1956.0185      | 978.5129         | 18 |
| 21 | 2377.1969 | 1189.1021       | 2360.1703      | 1180.5888        | 2359.1863      | 1180.0968        | T    | 1860.9450 | 930.9761        | 1843.9185      | 922.4629         | 1842.9345      | 921.9709         | 17 |
| 22 | 2478.2446 | 1239.6259       | 2461.2180      | 1231.1126        | 2460.2340      | 1230.6206        | T    | 1759.8973 | 880.4523        | 1742.8708      | 871.9390         | 1741.8868      | 871.4470         | 16 |

|    |           |           |           |           |           |           |   |           |          |           |          |           |          |    |
|----|-----------|-----------|-----------|-----------|-----------|-----------|---|-----------|----------|-----------|----------|-----------|----------|----|
| 23 | 2549.2817 | 1275.1445 | 2532.2551 | 1266.6312 | 2531.2711 | 1266.1392 | A | 1658.8497 | 829.9285 | 1641.8231 | 821.4152 | 1640.8391 | 820.9232 | 15 |
| 24 | 2677.3766 | 1339.1920 | 2660.3501 | 1330.6787 | 2659.3661 | 1330.1867 | K | 1587.8125 | 794.4099 | 1570.7860 | 785.8966 | 1569.8020 | 785.4046 | 14 |
| 25 | 2791.4196 | 1396.2134 | 2774.3930 | 1387.7002 | 2773.4090 | 1387.2081 | N | 1459.7176 | 730.3624 | 1442.6910 | 721.8492 | 1441.7070 | 721.3571 | 13 |
| 26 | 2904.5036 | 1452.7555 | 2887.4771 | 1444.2422 | 2886.4931 | 1443.7502 | L | 1345.6747 | 673.3410 | 1328.6481 | 664.8277 | 1327.6641 | 664.3357 | 12 |
| 27 | 3051.5721 | 1526.2897 | 3034.5455 | 1517.7764 | 3033.5615 | 1517.2844 | F | 1232.5906 | 616.7989 | 1215.5640 | 608.2857 | 1214.5800 | 607.7937 | 11 |
| 28 | 3164.6561 | 1582.8317 | 3147.6296 | 1574.3184 | 3146.6456 | 1573.8264 | L | 1085.5222 | 543.2647 | 1068.4956 | 534.7515 | 1067.5116 | 534.2594 | 10 |
| 29 | 3278.6990 | 1639.8532 | 3261.6725 | 1631.3399 | 3260.6885 | 1630.8479 | N | 972.4381  | 486.7227 | 955.4116  | 478.2094 | 954.4275  | 477.7174 | 9  |
| 30 | 3415.7580 | 1708.3826 | 3398.7314 | 1699.8693 | 3397.7474 | 1699.3773 | H | 858.3952  | 429.7012 | 841.3686  | 421.1880 | 840.3846  | 420.6959 | 8  |
| 31 | 3502.7900 | 1751.8986 | 3485.7634 | 1743.3854 | 3484.7794 | 1742.8933 | S | 721.3363  | 361.1718 | 704.3097  | 352.6585 | 703.3257  | 352.1665 | 7  |
| 32 | 3631.8326 | 1816.4199 | 3614.8060 | 1807.9067 | 3613.8220 | 1807.4146 | E | 634.3042  | 317.6558 | 617.2777  | 309.1425 | 616.2937  | 308.6505 | 6  |
| 33 | 3746.8595 | 1873.9334 | 3729.8330 | 1865.4201 | 3728.8490 | 1864.9281 | N | 505.2617  | 253.1345 | 488.2351  | 244.6212 | 487.2511  | 244.1292 | 5  |
| 34 | 3817.8966 | 1909.4520 | 3800.8701 | 1900.9387 | 3799.8861 | 1900.4467 | A | 390.2347  | 195.6210 | 373.2082  | 187.1077 | 372.2241  | 186.6157 | 4  |
| 35 | 3918.9443 | 1959.9758 | 3901.9178 | 1951.4625 | 3900.9337 | 1950.9705 | T | 319.1976  | 160.1024 | 302.1710  | 151.5892 | 301.1870  | 151.0972 | 3  |
| 36 | 3989.9814 | 1995.4944 | 3972.9549 | 1986.9811 | 3971.9709 | 1986.4891 | A | 218.1499  | 109.5786 | 201.1234  | 101.0653 |           |          | 2  |
| 37 |           |           |           |           |           |           | K | 147.1128  | 74.0600  | 130.0863  | 65.5468  |           |          | 1  |

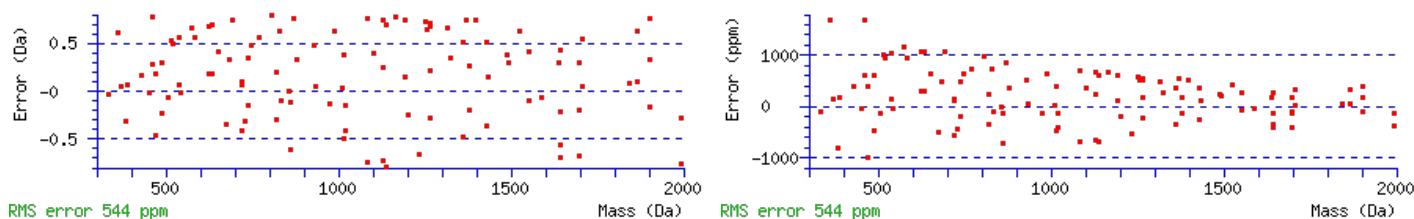

NCBI BLAST search of [MVSHHNLTTGATLINEQWLLTTAKNLFNLHSENATAK](#)

(Parameters: blastp, nr protein database, expect=20000, no filter, PAM30)

Other BLAST [web gateways](#)

All matches to this query

| Score | Mr(calc)  | Delta   | Sequence                                              | Site Analysis         |
|-------|-----------|---------|-------------------------------------------------------|-----------------------|
| 81.6  | 4135.0796 | 2.0197  | <a href="#">MVSHHNLTTGATLINEQWLLTTAKNLFNLHSENATAK</a> | Deamidated N33 87.76% |
| 69.8  | 4135.0796 | 2.0197  | <a href="#">MVSHHNLTTGATLINEQWLLTTAKNLFNLHSENATAK</a> | Deamidated N25 5.73%  |
| 68.9  | 4135.0796 | 2.0197  | <a href="#">MVSHHNLTTGATLINEQWLLTTAKNLFNLHSENATAK</a> | Deamidated N29 4.75%  |
| 61.3  | 4135.0796 | 2.0197  | <a href="#">MVSHHNLTTGATLINEQWLLTTAKNLFNLHSENATAK</a> | Deamidated N15 0.82%  |
| 61.2  | 4135.0796 | 2.0197  | <a href="#">MVSHHNLTTGATLINEQWLLTTAKNLFNLHSENATAK</a> | Deamidated N6 0.80%   |
| 54.0  | 4135.0796 | 2.0197  | <a href="#">MVSHHNLTTGATLINEQWLLTTAKNLFNLHSENATAK</a> | Deamidated Q17 0.15%  |
| 14.4  | 4137.1013 | -0.0020 | <a href="#">QTKALPSDQIIAAGKIVNTVLQELYVTNNCLAYPMK</a>  |                       |
| 9.4   | 4135.1090 | 1.9903  | <a href="#">LAFVIVFQNLVMFMSDFVDWVIPDIPKDISQIHK</a>    |                       |
| 9.4   | 4135.1090 | 1.9903  | <a href="#">LAFVIVFQNLVMFMSDFVDWVIPDIPKDISQIHK</a>    |                       |
| 9.0   | 4137.1033 | -0.0040 | <a href="#">SAVDLDEKNLVLNDVFMWFFPRPSGPKPRAYQLLR</a>   |                       |

Mascot: <http://www.matrixscience.com/>

# MASCOT SCIENCE Mascot Search Results

## Peptide View

MS/MS Fragmentation of **MVSHHNLTTGATLINEQWLLTTAKNLFNLHSENAK**

Found in **J3QR68** in **con\_Xuniprot\_HUMAN3**, J3QR68\_HUMAN Haptoglobin (Fragment) OS=Homo sapiens GN=HP PE=3 SV=1

Match to Query 28583: 4121.097856 from(1031.281740,4+) intensity(0.0000) rtinseconds(2484) scans(6778) index(17900)

Title: 111019\_Est\_MI\_YP\_G\_07Spectrum5868\_scans\_\_6778

Data file C:\mascot\20140703\_Tmgf\_1D\CSV\_UseAnalysis\MasterCSV\All\_Glyco\mgf\ptm\UC18ERLIC\_PTM\_35D.mgf

Click mouse within plot area to zoom in by factor of two about that point

Or,  to  Da

Label all possible matches  Label matches used for scoring

Show Y-axis

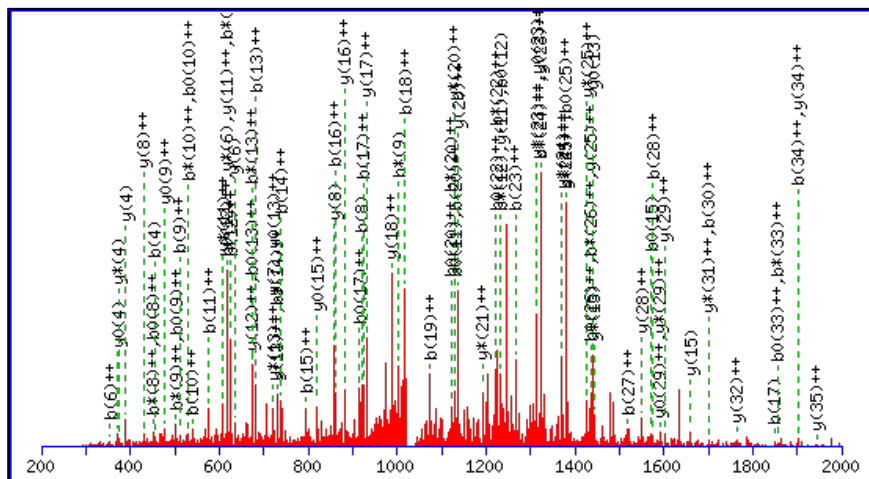

Monoisotopic mass of neutral peptide Mr(calc): 4119.0847

Fixed modifications: Carbamidomethyl (C) (apply to specified residues or termini only)

Variable modifications:

N33 : Deamidated (NQ)

Ions Score: 79 Expect: 2.2e-006

Matches : 90/414 fragment ions using 137 most intense peaks ([help](#))

| #  | b                | b <sup>++</sup>  | b <sup>*</sup>   | b <sup>*++</sup> | b <sup>0</sup>   | b <sup>0++</sup> | Seq. | y                | y <sup>++</sup>  | y <sup>*</sup> | y <sup>*++</sup> | y <sup>0</sup> | y <sup>0++</sup> | #  |
|----|------------------|------------------|------------------|------------------|------------------|------------------|------|------------------|------------------|----------------|------------------|----------------|------------------|----|
| 1  | 132.0478         | 66.5275          |                  |                  |                  |                  | M    |                  |                  |                |                  |                |                  | 37 |
| 2  | 231.1162         | 116.0617         |                  |                  |                  |                  | V    | 3989.0516        | 1995.0294        | 3972.0250      | 1986.5161        | 3971.0410      | 1986.0241        | 36 |
| 3  | 318.1482         | 159.5777         |                  |                  | 300.1376         | 150.5725         | S    | 3889.9831        | <b>1945.4952</b> | 3872.9566      | 1936.9819        | 3871.9726      | 1936.4899        | 35 |
| 4  | <b>455.2071</b>  | 228.1072         |                  |                  | 437.1966         | 219.1019         | H    | 3802.9511        | <b>1901.9792</b> | 3785.9246      | 1893.4659        | 3784.9405      | 1892.9739        | 34 |
| 5  | 592.2660         | 296.6367         |                  |                  | 574.2555         | 287.6314         | H    | 3665.8922        | 1833.4497        | 3648.8657      | 1824.9365        | 3647.8816      | 1824.4445        | 33 |
| 6  | 706.3090         | <b>353.6581</b>  | 689.2824         | 345.1448         | 688.2984         | 344.6528         | N    | 3528.8333        | <b>1764.9203</b> | 3511.8067      | 1756.4070        | 3510.8227      | 1755.9150        | 32 |
| 7  | 819.3930         | 410.2001         | 802.3665         | 401.6869         | 801.3825         | 401.1949         | L    | 3414.7904        | 1707.8988        | 3397.7638      | <b>1699.3855</b> | 3396.7798      | 1698.8935        | 31 |
| 8  | <b>920.4407</b>  | 460.7240         | 903.4141         | <b>452.2107</b>  | 902.4301         | <b>451.7187</b>  | T    | 3301.7063        | 1651.3568        | 3284.6798      | 1642.8435        | 3283.6957      | 1642.3515        | 30 |
| 9  | 1021.4884        | <b>511.2478</b>  | <b>1004.4618</b> | <b>502.7346</b>  | 1003.4778        | <b>502.2425</b>  | T    | 3200.6586        | <b>1600.8329</b> | 3183.6321      | <b>1592.3197</b> | 3182.6481      | <b>1591.8277</b> | 29 |
| 10 | 1078.5098        | <b>539.7586</b>  | 1061.4833        | <b>531.2453</b>  | 1060.4993        | <b>530.7533</b>  | G    | 3099.6109        | <b>1550.3091</b> | 3082.5844      | 1541.7958        | 3081.6004      | 1541.3038        | 28 |
| 11 | 1149.5470        | <b>575.2771</b>  | 1132.5204        | 566.7638         | <b>1131.5364</b> | 566.2718         | A    | 3042.5895        | 1521.7984        | 3025.5629      | 1513.2851        | 3024.5789      | 1512.7931        | 27 |
| 12 | 1250.5946        | <b>625.8010</b>  | <b>1233.5681</b> | <b>617.2877</b>  | <b>1232.5841</b> | <b>616.7957</b>  | T    | 2971.5524        | 1486.2798        | 2954.5258      | 1477.7665        | 2953.5418      | 1477.2745        | 26 |
| 13 | 1363.6787        | <b>682.3430</b>  | 1346.6521        | <b>673.8297</b>  | 1345.6681        | <b>673.3377</b>  | L    | 2870.5047        | <b>1435.7560</b> | 2853.4781      | <b>1427.2427</b> | 2852.4941      | 1426.7507        | 25 |
| 14 | 1476.7628        | <b>738.8850</b>  | 1459.7362        | <b>730.3717</b>  | 1458.7522        | 729.8797         | I    | 2757.4206        | <b>1379.2139</b> | 2740.3941      | <b>1370.7007</b> | 2739.4101      | 1370.2087        | 24 |
| 15 | 1590.8057        | <b>795.9065</b>  | 1573.7791        | 787.3932         | <b>1572.7951</b> | 786.9012         | N    | 2644.3366        | <b>1322.6719</b> | 2627.3100      | <b>1314.1586</b> | 2626.3260      | <b>1313.6666</b> | 23 |
| 16 | 1719.8483        | <b>860.4278</b>  | 1702.8217        | 851.9145         | 1701.8377        | 851.4225         | E    | 2530.2936        | 1265.6505        | 2513.2671      | 1257.1372        | 2512.2831      | 1256.6452        | 22 |
| 17 | <b>1847.9069</b> | <b>924.4571</b>  | 1830.8803        | 915.9438         | 1829.8963        | <b>915.4518</b>  | Q    | 2401.2510        | 1201.1292        | 2384.2245      | <b>1192.6159</b> | 2383.2405      | 1192.1239        | 21 |
| 18 | 2033.9862        | <b>1017.4967</b> | 2016.9596        | 1008.9834        | 2015.9756        | 1008.4914        | W    | 2273.1925        | <b>1137.0999</b> | 2256.1659      | <b>1128.5866</b> | 2255.1819      | 1128.0946        | 20 |
| 19 | 2147.0702        | <b>1074.0388</b> | 2130.0437        | 1065.5255        | 2129.0597        | 1065.0335        | L    | 2087.1131        | 1044.0602        | 2070.0866      | 1035.5469        | 2069.1026      | 1035.0549        | 19 |
| 20 | 2260.1543        | <b>1130.5808</b> | 2243.1278        | <b>1122.0675</b> | 2242.1437        | <b>1121.5755</b> | L    | 1974.0291        | <b>987.5182</b>  | 1957.0025      | 979.0049         | 1956.0185      | 978.5129         | 18 |
| 21 | 2361.2020        | 1181.1046        | 2344.1754        | 1172.5914        | 2343.1914        | 1172.0993        | T    | 1860.9450        | <b>930.9761</b>  | 1843.9185      | 922.4629         | 1842.9345      | 921.9709         | 17 |
| 22 | 2462.2497        | 1231.6285        | 2445.2231        | <b>1223.1152</b> | 2444.2391        | <b>1222.6232</b> | T    | 1759.8973        | <b>880.4523</b>  | 1742.8708      | 871.9390         | 1741.8868      | 871.4470         | 16 |
| 23 | 2533.2868        | <b>1267.1470</b> | 2516.2602        | 1258.6337        | 2515.2762        | 1258.1417        | A    | <b>1658.8497</b> | 829.9285         | 1641.8231      | 821.4152         | 1640.8391      | <b>820.9232</b>  | 15 |



|    |           |           |           |           |           |           |   |           |          |           |          |           |          |    |
|----|-----------|-----------|-----------|-----------|-----------|-----------|---|-----------|----------|-----------|----------|-----------|----------|----|
| 24 | 2661.3817 | 1331.1945 | 2644.3552 | 1322.6812 | 2643.3712 | 1322.1892 | K | 1587.8125 | 794.4099 | 1570.7860 | 785.8966 | 1569.8020 | 785.4046 | 14 |
| 25 | 2775.4247 | 1388.2160 | 2758.3981 | 1379.7027 | 2757.4141 | 1379.2107 | N | 1459.7176 | 730.3624 | 1442.6910 | 721.8492 | 1441.7070 | 721.3571 | 13 |
| 26 | 2888.5087 | 1444.7580 | 2871.4822 | 1436.2447 | 2870.4982 | 1435.7527 | L | 1345.6747 | 673.3410 | 1328.6481 | 664.8277 | 1327.6641 | 664.3357 | 12 |
| 27 | 3035.5771 | 1518.2922 | 3018.5506 | 1509.7789 | 3017.5666 | 1509.2869 | F | 1232.5906 | 616.7989 | 1215.5640 | 608.2857 | 1214.5800 | 607.7937 | 11 |
| 28 | 3148.6612 | 1574.8342 | 3131.6347 | 1566.3210 | 3130.6506 | 1565.8290 | L | 1085.5222 | 543.2647 | 1068.4956 | 534.7515 | 1067.5116 | 534.2594 | 10 |
| 29 | 3262.7041 | 1631.8557 | 3245.6776 | 1623.3424 | 3244.6936 | 1622.8504 | N | 972.4381  | 486.7227 | 955.4116  | 478.2094 | 954.4275  | 477.7174 | 9  |
| 30 | 3399.7630 | 1700.3852 | 3382.7365 | 1691.8719 | 3381.7525 | 1691.3799 | H | 858.3952  | 429.7012 | 841.3686  | 421.1880 | 840.3846  | 420.6959 | 8  |
| 31 | 3486.7951 | 1743.9012 | 3469.7685 | 1735.3879 | 3468.7845 | 1734.8959 | S | 721.3363  | 361.1718 | 704.3097  | 352.6585 | 703.3257  | 352.1665 | 7  |
| 32 | 3615.8377 | 1808.4225 | 3598.8111 | 1799.9092 | 3597.8271 | 1799.4172 | E | 634.3042  | 317.6558 | 617.2777  | 309.1425 | 616.2937  | 308.6505 | 6  |
| 33 | 3730.8646 | 1865.9359 | 3713.8381 | 1857.4227 | 3712.8540 | 1856.9307 | N | 505.2617  | 253.1345 | 488.2351  | 244.6212 | 487.2511  | 244.1292 | 5  |
| 34 | 3801.9017 | 1901.4545 | 3784.8752 | 1892.9412 | 3783.8912 | 1892.4492 | A | 390.2347  | 195.6210 | 373.2082  | 187.1077 | 372.2241  | 186.6157 | 4  |
| 35 | 3902.9494 | 1951.9783 | 3885.9229 | 1943.4651 | 3884.9388 | 1942.9731 | T | 319.1976  | 160.1024 | 302.1710  | 151.5892 | 301.1870  | 151.0972 | 3  |
| 36 | 3973.9865 | 1987.4969 | 3956.9600 | 1978.9836 | 3955.9759 | 1978.4916 | A | 218.1499  | 109.5786 | 201.1234  | 101.0653 |           |          | 2  |
| 37 |           |           |           |           |           |           | K | 147.1128  | 74.0600  | 130.0863  | 65.5468  |           |          | 1  |

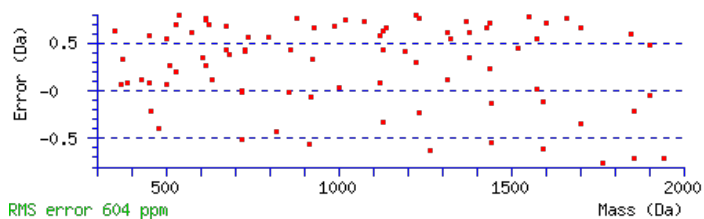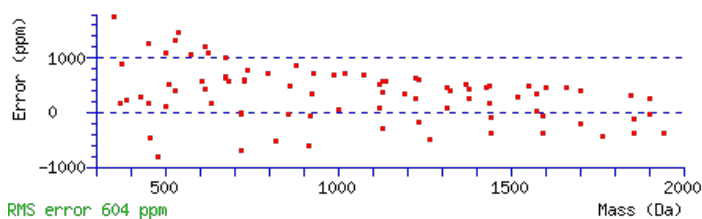

NCBI BLAST search of [MVSHHNLTTGATLINEQWLLTTAKNLFNLHSENATAK](#)

(Parameters: blastp, nr protein database, expect=20000, no filter, PAM30)

Other BLAST [web gateways](#)

All matches to this query

| Score | Mr(calc)  | Delta   | Sequence                                                  | Site Analysis         |
|-------|-----------|---------|-----------------------------------------------------------|-----------------------|
| 78.7  | 4119.0847 | 2.0131  | <a href="#">MVSHHNLTTGATLINEQWLLTTAKNLFNLHSENATAK</a>     | Deamidated N33 99.80% |
| 51.4  | 4119.0847 | 2.0131  | <a href="#">MVSHHNLTTGATLINEQWLLTTAKNLFNLHSENATAK</a>     | Deamidated N29 0.18%  |
| 39.0  | 4119.0847 | 2.0131  | <a href="#">MVSHHNLTTGATLINEQWLLTTAKNLFNLHSENATAK</a>     | Deamidated N25 0.01%  |
| 37.3  | 4119.0847 | 2.0131  | <a href="#">MVSHHNLTTGATLINEQWLLTTAKNLFNLHSENATAK</a>     | Deamidated N6 0.01%   |
| 17.1  | 4119.0847 | 2.0131  | <a href="#">MVSHHNLTTGATLINEQWLLTTAKNLFNLHSENATAK</a>     | Deamidated Q17 0.00%  |
| 16.1  | 4119.0847 | 2.0131  | <a href="#">MVSHHNLTTGATLINEQWLLTTAKNLFNLHSENATAK</a>     | Deamidated N15 0.00%  |
| 12.6  | 4121.1051 | -0.0073 | <a href="#">GTRSVFPEFGADPSAPNTGTLNWFPESTAPALPLQVGLYK</a>  |                       |
| 10.9  | 4119.0747 | 2.0232  | <a href="#">AEPVGPSPSPSTLSQGSFISTESIKNDLVASSSLPASTSIR</a> |                       |
| 9.1   | 4121.0921 | 0.0058  | <a href="#">CHSSIPAAAGGQVLLALLLCSTALTGMLFSSVSKQLAAM</a>   |                       |
| 8.2   | 4121.0939 | 0.0040  | <a href="#">MLGASVATGDVITFLDSHCEANVNWLPPLLDRIARNR</a>     |                       |

Mascot: <http://www.matrixscience.com/>



# MATRIX SCIENCE Mascot Search Results

## Peptide View

MS/MS Fragmentation of **GSFPWQAKMVSHHNLTTGATLINEQWLLTTAKNLFNLHSENATAK**

Found in **J3QR68** in **con\_Xuniprot\_HUMAN3**, J3QR68\_HUMAN Haptoglobin (Fragment) OS=Homo sapiens GN=HP PE=3 SV=1

Match to Query 29001: 5039.490270 from(1008.905330,5+) intensity(60329.3711) rtinseconds(2527) scans(6847) index(24174)

Title: 111019\_Est\_MI\_YS\_G\_05Spectrum5943\_scans\_\_6847

Data file C:\mascot\20140703\_Tmgf\_1D\CSV\_UseAnalysis\MasterCSV\All\_Glyco\mgf\ptm\UC18ERLIC\_PTM\_35D.mgf

Click mouse within plot area to zoom in by factor of two about that point

Or, to Da

Label all possible matches Label matches used for scoring

Show Y-axis

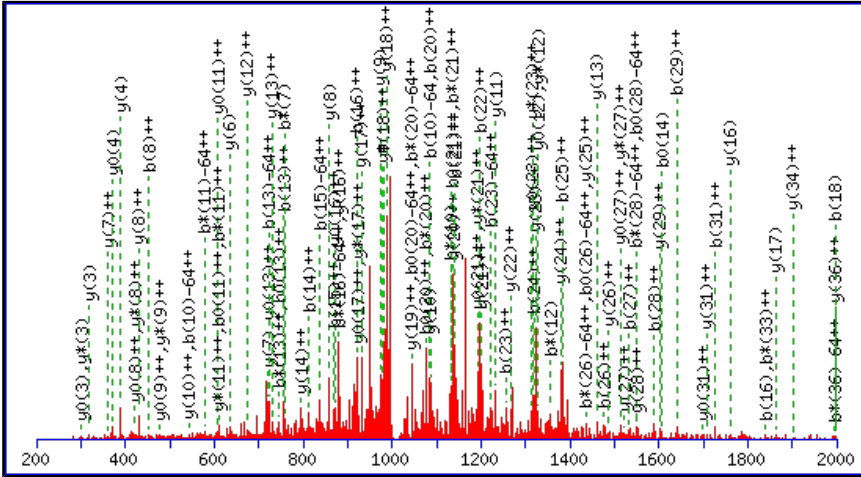

Monoisotopic mass of neutral peptide Mr(calc): 5039.4763

Fixed modifications: Carbamidomethyl (C) (apply to specified residues or termini only)

Variable modifications:

- Q6 : Deamidated (NQ)
- M9 : Oxidation (M), with neutral losses 0.0000(shown in table), 63.9983
- N14 : Deamidated (NQ)
- N37 : Deamidated (NQ)
- N41 : Deamidated (NQ)

Ions Score: 78 Expect: 2.4e-006

Matches : 103/776 fragment ions using 175 most intense peaks ([help](#))

| #  | b         | b <sup>++</sup> | b <sup>*</sup> | b <sup>*++</sup> | b <sup>0</sup> | b <sup>0++</sup> | Seq. | y         | y <sup>++</sup> | y <sup>*</sup> | y <sup>*++</sup> | y <sup>0</sup> | y <sup>0++</sup> | #  |
|----|-----------|-----------------|----------------|------------------|----------------|------------------|------|-----------|-----------------|----------------|------------------|----------------|------------------|----|
| 1  | 58.0287   | 29.5180         |                |                  |                |                  | G    |           |                 |                |                  |                |                  | 45 |
| 2  | 145.0608  | 73.0340         |                |                  | 127.0502       | 64.0287          | S    | 4983.4622 | 2492.2347       | 4966.4356      | 2483.7215        | 4965.4516      | 2483.2294        | 44 |
| 3  | 292.1292  | 146.5682        |                |                  | 274.1186       | 137.5629         | F    | 4896.4302 | 2448.7187       | 4879.4036      | 2440.2054        | 4878.4196      | 2439.7134        | 43 |
| 4  | 389.1819  | 195.0946        |                |                  | 371.1714       | 186.0893         | P    | 4749.3617 | 2375.1845       | 4732.3352      | 2366.6712        | 4731.3512      | 2366.1792        | 42 |
| 5  | 575.2613  | 288.1343        |                |                  | 557.2507       | 279.1290         | W    | 4652.3090 | 2326.6581       | 4635.2824      | 2318.1449        | 4634.2984      | 2317.6528        | 41 |
| 6  | 704.3039  | 352.6556        | 687.2773       | 344.1423         | 686.2933       | 343.6503         | Q    | 4466.2297 | 2233.6185       | 4449.2031      | 2225.1052        | 4448.2191      | 2224.6132        | 40 |
| 7  | 775.3410  | 388.1741        | 758.3144       | 379.6608         | 757.3304       | 379.1688         | A    | 4337.1871 | 2169.0972       | 4320.1605      | 2160.5839        | 4319.1765      | 2160.0919        | 39 |
| 8  | 903.4359  | 452.2216        | 886.4094       | 443.7083         | 885.4254       | 443.2163         | K    | 4266.1500 | 2133.5786       | 4249.1234      | 2125.0653        | 4248.1394      | 2124.5733        | 38 |
| 9  | 1050.4713 | 525.7393        | 1033.4448      | 517.2260         | 1032.4608      | 516.7340         | M    | 4138.0550 | 2069.5311       | 4121.0284      | 2061.0179        | 4120.0444      | 2060.5259        | 37 |
| 10 | 1149.5397 | 575.2735        | 1132.5132      | 566.7602         | 1131.5292      | 566.2682         | V    | 3991.0196 | 1996.0134       | 3973.9930      | 1987.5002        | 3973.0090      | 1987.0082        | 36 |
| 11 | 1236.5718 | 618.7895        | 1219.5452      | 610.2762         | 1218.5612      | 609.7842         | S    | 3891.9512 | 1946.4792       | 3874.9246      | 1937.9660        | 3873.9406      | 1937.4739        | 35 |
| 12 | 1373.6307 | 687.3190        | 1356.6041      | 678.8057         | 1355.6201      | 678.3137         | H    | 3804.9191 | 1902.9632       | 3787.8926      | 1894.4499        | 3786.9086      | 1893.9579        | 34 |
| 13 | 1510.6896 | 755.8484        | 1493.6630      | 747.3352         | 1492.6790      | 746.8432         | H    | 3667.8602 | 1834.4338       | 3650.8337      | 1825.9205        | 3649.8497      | 1825.4285        | 33 |
| 14 | 1625.7165 | 813.3619        | 1608.6900      | 804.8486         | 1607.7060      | 804.3566         | N    | 3530.8013 | 1765.9043       | 3513.7748      | 1757.3910        | 3512.7908      | 1756.8990        | 32 |
| 15 | 1738.8006 | 869.9039        | 1721.7741      | 861.3907         | 1720.7900      | 860.8987         | L    | 3415.7744 | 1708.3908       | 3398.7478      | 1699.8776        | 3397.7638      | 1699.3855        | 31 |
| 16 | 1839.8483 | 920.4278        | 1822.8217      | 911.9145         | 1821.8377      | 911.4225         | T    | 3302.6903 | 1651.8488       | 3285.6638      | 1643.3355        | 3284.6798      | 1642.8435        | 30 |
| 17 | 1940.8960 | 970.9516        | 1923.8694      | 962.4383         | 1922.8854      | 961.9463         | T    | 3201.6426 | 1601.3250       | 3184.6161      | 1592.8117        | 3183.6321      | 1592.3197        | 29 |
| 18 | 1997.9174 | 999.4624        | 1980.8909      | 990.9491         | 1979.9069      | 990.4571         | G    | 3100.5950 | 1550.8011       | 3083.5684      | 1542.2878        | 3082.5844      | 1541.7958        | 28 |
| 19 | 2068.9545 | 1034.9809       | 2051.9280      | 1026.4676        | 2050.9440      | 1025.9756        | A    | 3043.5735 | 1522.2904       | 3026.5469      | 1513.7771        | 3025.5629      | 1513.2851        | 27 |
| 20 | 2170.0022 | 1085.5047       | 2152.9757      | 1076.9915        | 2151.9917      | 1076.4995        | T    | 2972.5364 | 1486.7718       | 2955.5098      | 1478.2586        | 2954.5258      | 1477.7665        | 26 |
| 21 | 2283.0863 | 1142.0468       | 2266.0597      | 1133.5335        | 2265.0757      | 1133.0415        | L    | 2871.4887 | 1436.2480       | 2854.4622      | 1427.7347        | 2853.4781      | 1427.2427        | 25 |

|    |           |                  |           |                  |           |           |   |                  |                  |                  |                  |                  |                  |    |
|----|-----------|------------------|-----------|------------------|-----------|-----------|---|------------------|------------------|------------------|------------------|------------------|------------------|----|
| 22 | 2396.1703 | <b>1198.5888</b> | 2379.1438 | 1190.0755        | 2378.1598 | 1189.5835 | I | 2758.4046        | <b>1379.7060</b> | 2741.3781        | 1371.1927        | 2740.3941        | 1370.7007        | 24 |
| 23 | 2510.2133 | <b>1255.6103</b> | 2493.1867 | 1247.0970        | 2492.2027 | 1246.6050 | N | 2645.3206        | <b>1323.1639</b> | 2628.2940        | <b>1314.6507</b> | 2627.3100        | <b>1314.1586</b> | 23 |
| 24 | 2639.2559 | <b>1320.1316</b> | 2622.2293 | 1311.6183        | 2621.2453 | 1311.1263 | E | 2531.2776        | <b>1266.1425</b> | 2514.2511        | 1257.6292        | 2513.2671        | 1257.1372        | 22 |
| 25 | 2767.3144 | <b>1384.1609</b> | 2750.2879 | 1375.6476        | 2749.3039 | 1375.1556 | Q | 2402.2351        | <b>1201.6212</b> | 2385.2085        | <b>1193.1079</b> | 2384.2245        | <b>1192.6159</b> | 21 |
| 26 | 2953.3938 | <b>1477.2005</b> | 2936.3672 | 1468.6872        | 2935.3832 | 1468.1952 | W | 2274.1765        | <b>1137.5919</b> | 2257.1499        | 1129.0786        | 2256.1659        | 1128.5866        | 20 |
| 27 | 3066.4778 | <b>1533.7425</b> | 3049.4513 | 1525.2293        | 3048.4673 | 1524.7373 | L | 2088.0972        | <b>1044.5522</b> | 2071.0706        | 1036.0389        | 2070.0866        | 1035.5469        | 19 |
| 28 | 3179.5619 | <b>1590.2846</b> | 3162.5353 | 1581.7713        | 3161.5513 | 1581.2793 | L | 1975.0131        | <b>988.0102</b>  | 1957.9865        | <b>979.4969</b>  | 1957.0025        | <b>979.0049</b>  | 18 |
| 29 | 3280.6096 | <b>1640.8084</b> | 3263.5830 | 1632.2951        | 3262.5990 | 1631.8031 | T | <b>1861.9290</b> | <b>931.4682</b>  | 1844.9025        | <b>922.9549</b>  | 1843.9185        | <b>922.4629</b>  | 17 |
| 30 | 3381.6572 | 1691.3323        | 3364.6307 | 1682.8190        | 3363.6467 | 1682.3270 | T | <b>1760.8814</b> | <b>880.9443</b>  | 1743.8548        | 872.4310         | 1742.8708        | <b>871.9390</b>  | 16 |
| 31 | 3452.6944 | <b>1726.8508</b> | 3435.6678 | 1718.3375        | 3434.6838 | 1717.8455 | A | 1659.8337        | 830.4205         | 1642.8071        | 821.9072         | 1641.8231        | 821.4152         | 15 |
| 32 | 3580.7893 | 1790.8983        | 3563.7628 | 1782.3850        | 3562.7788 | 1781.8930 | K | 1588.7966        | <b>794.9019</b>  | 1571.7700        | 786.3886         | 1570.7860        | 785.8966         | 14 |
| 33 | 3694.8322 | 1847.9198        | 3677.8057 | <b>1839.4065</b> | 3676.8217 | 1838.9145 | N | <b>1460.7016</b> | <b>730.8544</b>  | 1443.6751        | 722.3412         | 1442.6910        | <b>721.8492</b>  | 13 |
| 34 | 3807.9163 | 1904.4618        | 3790.8898 | 1895.9485        | 3789.9057 | 1895.4565 | L | 1346.6587        | <b>673.8330</b>  | <b>1329.6321</b> | 665.3197         | <b>1328.6481</b> | 664.8277         | 12 |
| 35 | 3954.9847 | 1977.9960        | 3937.9582 | 1969.4827        | 3936.9742 | 1968.9907 | F | <b>1233.5746</b> | 617.2909         | 1216.5481        | <b>608.7777</b>  | 1215.5640        | <b>608.2857</b>  | 11 |
| 36 | 4068.0688 | 2034.5380        | 4051.0422 | 2026.0248        | 4050.0582 | 2025.5328 | L | <b>1086.5062</b> | <b>543.7567</b>  | 1069.4796        | 535.2435         | 1068.4956        | 534.7515         | 10 |
| 37 | 4183.0957 | 2092.0515        | 4166.0692 | 2083.5382        | 4165.0852 | 2083.0462 | N | <b>973.4221</b>  | 487.2147         | 956.3956         | <b>478.7014</b>  | 955.4116         | <b>478.2094</b>  | 9  |
| 38 | 4320.1546 | 2160.5810        | 4303.1281 | 2152.0677        | 4302.1441 | 2151.5757 | H | <b>858.3952</b>  | <b>429.7012</b>  | 841.3686         | <b>421.1880</b>  | 840.3846         | <b>420.6959</b>  | 8  |
| 39 | 4407.1867 | 2204.0970        | 4390.1601 | 2195.5837        | 4389.1761 | 2195.0917 | S | <b>721.3363</b>  | <b>361.1718</b>  | 704.3097         | 352.6585         | 703.3257         | 352.1665         | 7  |
| 40 | 4536.2293 | 2268.6183        | 4519.2027 | 2260.1050        | 4518.2187 | 2259.6130 | E | <b>634.3042</b>  | 317.6558         | 617.2777         | 309.1425         | 616.2937         | 308.6505         | 6  |
| 41 | 4651.2562 | 2326.1317        | 4634.2297 | 2317.6185        | 4633.2456 | 2317.1265 | N | 505.2617         | 253.1345         | 488.2351         | 244.6212         | 487.2511         | 244.1292         | 5  |
| 42 | 4722.2933 | 2361.6503        | 4705.2668 | 2353.1370        | 4704.2828 | 2352.6450 | A | <b>390.2347</b>  | 195.6210         | 373.2082         | 187.1077         | <b>372.2241</b>  | 186.6157         | 4  |
| 43 | 4823.3410 | 2412.1741        | 4806.3145 | 2403.6609        | 4805.3304 | 2403.1689 | T | <b>319.1976</b>  | 160.1024         | <b>302.1710</b>  | 151.5892         | <b>301.1870</b>  | 151.0972         | 3  |
| 44 | 4894.3781 | 2447.6927        | 4877.3516 | 2439.1794        | 4876.3676 | 2438.6874 | A | 218.1499         | 109.5786         | 201.1234         | 101.0653         |                  |                  | 2  |
| 45 |           |                  |           |                  |           |           | K | 147.1128         | 74.0600          | 130.0863         | 65.5468          |                  |                  | 1  |

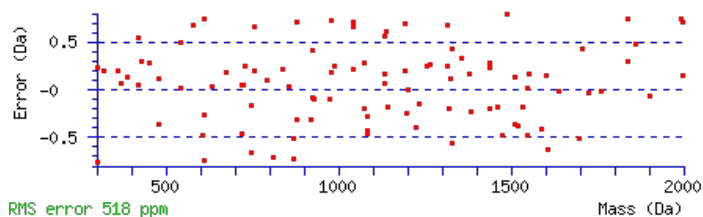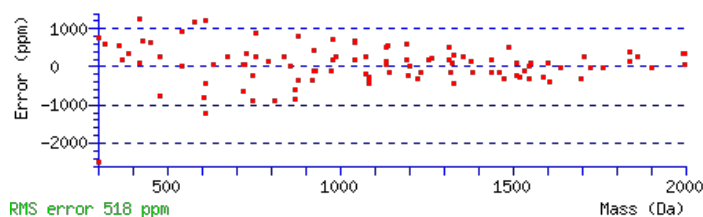

NCBI BLAST search of [GSEFPWQAKMVSHHNLTTGATLINEQWLLTTAKNLFNLHSENATAK](#)

(Parameters: blastp, nr protein database, expect=20000, no filter, PAM30)

Other BLAST [web gateways](#)

All matches to this query

| Score | Mr(calc)  | Delta  | Sequence                                                       | Site Analysis                       |
|-------|-----------|--------|----------------------------------------------------------------|-------------------------------------|
| 78.3  | 5039.4763 | 0.0140 | <a href="#">GSEFPWQAKMVSHHNLTTGATLINEQWLLTTAKNLFNLHSENATAK</a> | Deamidated Q6, N14, N37, N41 59.76% |
| 75.3  | 5038.4923 | 0.9980 | <a href="#">GSEFPWQAKMVSHHNLTTGATLINEQWLLTTAKNLFNLHSENATAK</a> |                                     |
| 71.9  | 5039.4763 | 0.0140 | <a href="#">GSEFPWQAKMVSHHNLTTGATLINEQWLLTTAKNLFNLHSENATAK</a> | Deamidated Q6, N14, N23, N41 13.75% |
| 71.4  | 5037.5083 | 1.9820 | <a href="#">GSEFPWQAKMVSHHNLTTGATLINEQWLLTTAKNLFNLHSENATAK</a> |                                     |
| 70.7  | 5039.4763 | 0.0140 | <a href="#">GSEFPWQAKMVSHHNLTTGATLINEQWLLTTAKNLFNLHSENATAK</a> | Deamidated Q6, N33, N37, N41 10.41% |
| 67.0  | 5038.4923 | 0.9980 | <a href="#">GSEFPWQAKMVSHHNLTTGATLINEQWLLTTAKNLFNLHSENATAK</a> |                                     |
| 66.3  | 5037.5083 | 1.9820 | <a href="#">GSEFPWQAKMVSHHNLTTGATLINEQWLLTTAKNLFNLHSENATAK</a> |                                     |
| 64.9  | 5038.4923 | 0.9980 | <a href="#">GSEFPWQAKMVSHHNLTTGATLINEQWLLTTAKNLFNLHSENATAK</a> |                                     |
| 58.6  | 5039.4763 | 0.0140 | <a href="#">GSEFPWQAKMVSHHNLTTGATLINEQWLLTTAKNLFNLHSENATAK</a> | Deamidated Q25, N33, N37, N41 0.65% |
| 58.4  | 5039.4763 | 0.0140 | <a href="#">GSEFPWQAKMVSHHNLTTGATLINEQWLLTTAKNLFNLHSENATAK</a> | Deamidated N23, Q25, N33, N37 0.62% |

Mascot: <http://www.matrixscience.com/>

# MASCOT SCIENCE Mascot Search Results

## Peptide View

MS/MS Fragmentation of **MVSHHNLTTGATLINEQWLLTTAKNLFNLHSEENATAK**

Found in **J3QR68** in **con\_Xuniprot\_HUMAN3**, J3QR68\_HUMAN Haptoglobin (Fragment) OS=Homo sapiens GN=HP PE=3 SV=1

Match to Query 28867: 4137.072576 from(1035.275420,4+) intensity(40245.8359) rtinseconds(2574) scans(6818) index(26988)

Title: 111019\_Est\_MI\_YS\_G\_09Spectrum5968\_scans\_\_6818

Data file C:\mascot\20140703\_Tmgf\_1D\CSV\_UseAnalysis\MasterCSV\All\_Glyco\mgf\ptm\UC18ERLIC\_PTM\_35D.mgf

Click mouse within plot area to zoom in by factor of two about that point

Or, to Da

Label all possible matches Label matches used for scoring

Show Y-axis

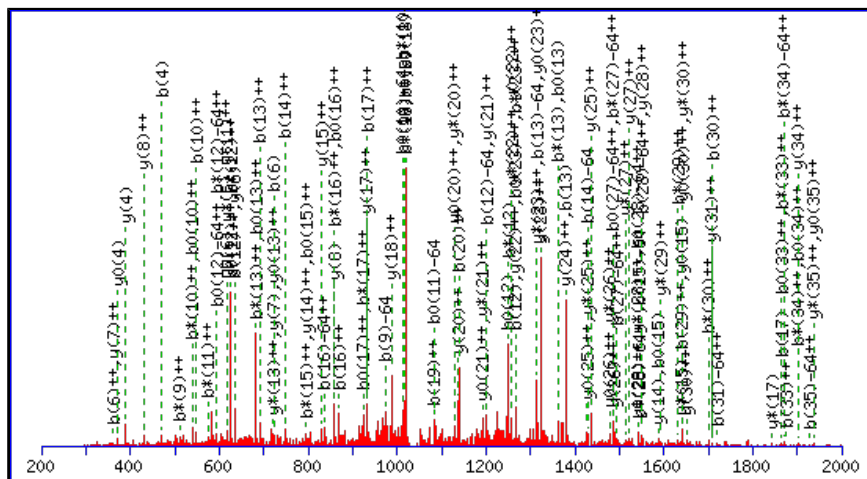

Monoisotopic mass of neutral peptide Mr(calc): 4136.0636

Fixed modifications: Carbamidomethyl (C) (apply to specified residues or termini only)

Variable modifications:

M1 : Oxidation (M), with neutral losses 0.0000 (shown in table), 63.9983

Q17 : Deamidated (NQ)

N33 : Deamidated (NQ)

Ions Score: 78 Expect: 2.9e-006

Matches : 120/616 fragment ions using 153 most intense peaks ([help](#))

| #  | b         | b <sup>++</sup> | b <sup>*</sup> | b <sup>*++</sup> | b <sup>0</sup> | b <sup>0++</sup> | Seq. | y         | y <sup>++</sup> | y <sup>*</sup> | y <sup>*++</sup> | y <sup>0</sup> | y <sup>0++</sup> | #  |
|----|-----------|-----------------|----------------|------------------|----------------|------------------|------|-----------|-----------------|----------------|------------------|----------------|------------------|----|
| 1  | 148.0427  | 74.5250         |                |                  |                |                  | M    |           |                 |                |                  |                |                  | 37 |
| 2  | 247.1111  | 124.0592        |                |                  |                |                  | V    | 3990.0356 | 1995.5214       | 3973.0090      | 1987.0081        | 3972.0250      | 1986.5161        | 36 |
| 3  | 334.1431  | 167.5752        |                |                  | 316.1326       | 158.5699         | S    | 3890.9672 | 1945.9872       | 3873.9406      | 1937.4739        | 3872.9566      | 1936.9819        | 35 |
| 4  | 471.2020  | 236.1047        |                |                  | 453.1915       | 227.0994         | H    | 3803.9351 | 1902.4712       | 3786.9086      | 1893.9579        | 3785.9246      | 1893.4659        | 34 |
| 5  | 608.2609  | 304.6341        |                |                  | 590.2504       | 295.6288         | H    | 3666.8762 | 1833.9417       | 3649.8497      | 1825.4285        | 3648.8657      | 1824.9365        | 33 |
| 6  | 722.3039  | 361.6556        | 705.2773       | 353.1423         | 704.2933       | 352.6503         | N    | 3529.8173 | 1765.4123       | 3512.7908      | 1756.8990        | 3511.8067      | 1756.4070        | 32 |
| 7  | 835.3879  | 418.1976        | 818.3614       | 409.6843         | 817.3774       | 409.1923         | L    | 3415.7744 | 1708.3908       | 3398.7478      | 1699.8776        | 3397.7638      | 1699.3855        | 31 |
| 8  | 936.4356  | 468.7214        | 919.4091       | 460.2082         | 918.4250       | 459.7162         | T    | 3302.6903 | 1651.8488       | 3285.6638      | 1643.3355        | 3284.6798      | 1642.8435        | 30 |
| 9  | 1037.4833 | 519.2453        | 1020.4567      | 510.7320         | 1019.4727      | 510.2400         | T    | 3201.6426 | 1601.3250       | 3184.6161      | 1592.8117        | 3183.6321      | 1592.3197        | 29 |
| 10 | 1094.5048 | 547.7560        | 1077.4782      | 539.2427         | 1076.4942      | 538.7507         | G    | 3100.5950 | 1550.8011       | 3083.5684      | 1542.2878        | 3082.5844      | 1541.7958        | 28 |
| 11 | 1165.5419 | 583.2746        | 1148.5153      | 574.7613         | 1147.5313      | 574.2693         | A    | 3043.5735 | 1522.2904       | 3026.5469      | 1513.7771        | 3025.5629      | 1513.2851        | 27 |
| 12 | 1266.5895 | 633.7984        | 1249.5630      | 625.2851         | 1248.5790      | 624.7931         | T    | 2972.5364 | 1486.7718       | 2955.5098      | 1478.2586        | 2954.5258      | 1477.7665        | 26 |
| 13 | 1379.6736 | 690.3404        | 1362.6471      | 681.8272         | 1361.6630      | 681.3352         | L    | 2871.4887 | 1436.2480       | 2854.4622      | 1427.7347        | 2853.4781      | 1427.2427        | 25 |
| 14 | 1492.7577 | 746.8825        | 1475.7311      | 738.3692         | 1474.7471      | 737.8772         | I    | 2758.4046 | 1379.7060       | 2741.3781      | 1371.1927        | 2740.3941      | 1370.7007        | 24 |
| 15 | 1606.8006 | 803.9039        | 1589.7741      | 795.3907         | 1588.7900      | 794.8987         | N    | 2645.3206 | 1323.1639       | 2628.2940      | 1314.6506        | 2627.3100      | 1314.1586        | 23 |
| 16 | 1735.8432 | 868.4252        | 1718.8166      | 859.9120         | 1717.8326      | 859.4200         | E    | 2531.2776 | 1266.1425       | 2514.2511      | 1257.6292        | 2513.2671      | 1257.1372        | 22 |
| 17 | 1864.8858 | 932.9465        | 1847.8592      | 924.4333         | 1846.8752      | 923.9413         | Q    | 2402.2351 | 1201.6212       | 2385.2085      | 1193.1079        | 2384.2245      | 1192.6159        | 21 |
| 18 | 2050.9651 | 1025.9862       | 2033.9386      | 1017.4729        | 2032.9545      | 1016.9809        | W    | 2273.1925 | 1137.0999       | 2256.1659      | 1128.5866        | 2255.1819      | 1128.0946        | 20 |
| 19 | 2164.0492 | 1082.5282       | 2147.0226      | 1074.0149        | 2146.0386      | 1073.5229        | L    | 2087.1131 | 1044.0602       | 2070.0866      | 1035.5469        | 2069.1026      | 1035.0549        | 19 |
| 20 | 2277.1332 | 1139.0703       | 2260.1067      | 1130.5570        | 2259.1227      | 1130.0650        | L    | 1974.0291 | 987.5182        | 1957.0025      | 979.0049         | 1956.0185      | 978.5129         | 18 |
| 21 | 2378.1809 | 1189.5941       | 2361.1544      | 1181.0808        | 2360.1703      | 1180.5888        | T    | 1860.9450 | 930.9761        | 1843.9185      | 922.4629         | 1842.9345      | 921.9709         | 17 |
| 22 | 2479.2286 | 1240.1179       | 2462.2020      | 1231.6047        | 2461.2180      | 1231.1126        | T    | 1759.8973 | 880.4523        | 1742.8708      | 871.9390         | 1741.8868      | 871.4470         | 16 |

|    |           |           |           |           |           |           |   |           |          |           |          |           |          |    |
|----|-----------|-----------|-----------|-----------|-----------|-----------|---|-----------|----------|-----------|----------|-----------|----------|----|
| 23 | 2550.2657 | 1275.6365 | 2533.2392 | 1267.1232 | 2532.2551 | 1266.6312 | A | 1658.8497 | 829.9285 | 1641.8231 | 821.4152 | 1640.8391 | 820.9232 | 15 |
| 24 | 2678.3607 | 1339.6840 | 2661.3341 | 1331.1707 | 2660.3501 | 1330.6787 | K | 1587.8125 | 794.4099 | 1570.7860 | 785.8966 | 1569.8020 | 785.4046 | 14 |
| 25 | 2792.4036 | 1396.7054 | 2775.3770 | 1388.1922 | 2774.3930 | 1387.7002 | N | 1459.7176 | 730.3624 | 1442.6910 | 721.8492 | 1441.7070 | 721.3571 | 13 |
| 26 | 2905.4877 | 1453.2475 | 2888.4611 | 1444.7342 | 2887.4771 | 1444.2422 | L | 1345.6747 | 673.3410 | 1328.6481 | 664.8277 | 1327.6641 | 664.3357 | 12 |
| 27 | 3052.5561 | 1526.7817 | 3035.5295 | 1518.2684 | 3034.5455 | 1517.7764 | F | 1232.5906 | 616.7989 | 1215.5640 | 608.2857 | 1214.5800 | 607.7937 | 11 |
| 28 | 3165.6401 | 1583.3237 | 3148.6136 | 1574.8104 | 3147.6296 | 1574.3184 | L | 1085.5222 | 543.2647 | 1068.4956 | 534.7515 | 1067.5116 | 534.2594 | 10 |
| 29 | 3279.6831 | 1640.3452 | 3262.6565 | 1631.8319 | 3261.6725 | 1631.3399 | N | 972.4381  | 486.7227 | 955.4116  | 478.2094 | 954.4275  | 477.7174 | 9  |
| 30 | 3416.7420 | 1708.8746 | 3399.7154 | 1700.3614 | 3398.7314 | 1699.8693 | H | 858.3952  | 429.7012 | 841.3686  | 421.1880 | 840.3846  | 420.6959 | 8  |
| 31 | 3503.7740 | 1752.3906 | 3486.7475 | 1743.8774 | 3485.7634 | 1743.3854 | S | 721.3363  | 361.1718 | 704.3097  | 352.6585 | 703.3257  | 352.1665 | 7  |
| 32 | 3632.8166 | 1816.9119 | 3615.7900 | 1808.3987 | 3614.8060 | 1807.9067 | E | 634.3042  | 317.6558 | 617.2777  | 309.1425 | 616.2937  | 308.6505 | 6  |
| 33 | 3747.8435 | 1874.4254 | 3730.8170 | 1865.9121 | 3729.8330 | 1865.4201 | N | 505.2617  | 253.1345 | 488.2351  | 244.6212 | 487.2511  | 244.1292 | 5  |
| 34 | 3818.8807 | 1909.9440 | 3801.8541 | 1901.4307 | 3800.8701 | 1900.9387 | A | 390.2347  | 195.6210 | 373.2082  | 187.1077 | 372.2241  | 186.6157 | 4  |
| 35 | 3919.9283 | 1960.4678 | 3902.9018 | 1951.9545 | 3901.9178 | 1951.4625 | T | 319.1976  | 160.1024 | 302.1710  | 151.5892 | 301.1870  | 151.0972 | 3  |
| 36 | 3990.9654 | 1995.9864 | 3973.9389 | 1987.4731 | 3972.9549 | 1986.9811 | A | 218.1499  | 109.5786 | 201.1234  | 101.0653 |           |          | 2  |
| 37 |           |           |           |           |           |           | K | 147.1128  | 74.0600  | 130.0863  | 65.5468  |           |          | 1  |

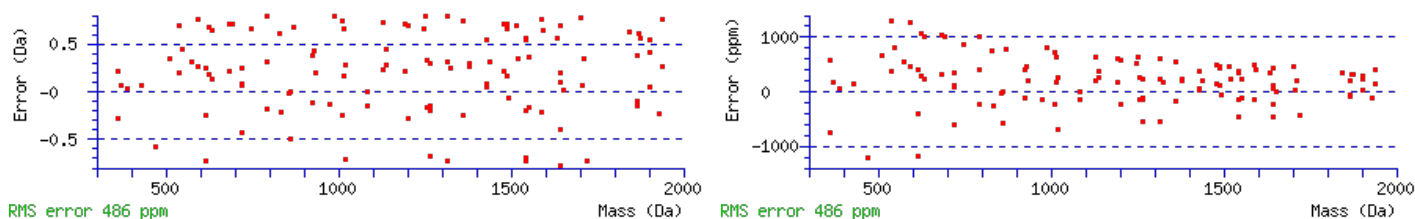

NCBI BLAST search of [MVSHHNLTTGATLINEQWLLTTAKNLFNLHSEENATAK](#)

(Parameters: blastp, nr protein database, expect=20000, no filter, PAM30)

Other BLAST [web gateways](#)

All matches to this query

| Score | Mr(calc)  | Delta  | Sequence                                               | Site Analysis              |
|-------|-----------|--------|--------------------------------------------------------|----------------------------|
| 78.2  | 4136.0636 | 1.0089 | <a href="#">MVSHHNLTTGATLINEQWLLTTAKNLFNLHSEENATAK</a> | Deamidated Q17, N33 28.83% |
| 76.0  | 4136.0636 | 1.0089 | <a href="#">MVSHHNLTTGATLINEQWLLTTAKNLFNLHSEENATAK</a> | Deamidated N25, N33 17.13% |
| 75.4  | 4136.0636 | 1.0089 | <a href="#">MVSHHNLTTGATLINEQWLLTTAKNLFNLHSEENATAK</a> | Deamidated N29, N33 15.09% |
| 75.4  | 4136.0636 | 1.0089 | <a href="#">MVSHHNLTTGATLINEQWLLTTAKNLFNLHSEENATAK</a> | Deamidated N25, N29 15.03% |
| 72.1  | 4136.0636 | 1.0089 | <a href="#">MVSHHNLTTGATLINEQWLLTTAKNLFNLHSEENATAK</a> | Deamidated N6, N33 7.06%   |
| 71.4  | 4136.0636 | 1.0089 | <a href="#">MVSHHNLTTGATLINEQWLLTTAKNLFNLHSEENATAK</a> | Deamidated N15, N33 5.95%  |
| 70.4  | 4136.0636 | 1.0089 | <a href="#">MVSHHNLTTGATLINEQWLLTTAKNLFNLHSEENATAK</a> | Deamidated Q17, N25 4.81%  |
| 64.3  | 4136.0636 | 1.0089 | <a href="#">MVSHHNLTTGATLINEQWLLTTAKNLFNLHSEENATAK</a> | Deamidated N15, N25 1.17%  |
| 63.8  | 4136.0636 | 1.0089 | <a href="#">MVSHHNLTTGATLINEQWLLTTAKNLFNLHSEENATAK</a> | Deamidated N6, N25 1.04%   |
| 62.5  | 4136.0636 | 1.0089 | <a href="#">MVSHHNLTTGATLINEQWLLTTAKNLFNLHSEENATAK</a> | Deamidated Q17, N29 0.78%  |

Mascot: <http://www.matrixscience.com/>



# MASCOT SCIENCE Mascot Search Results

## Peptide View

MS/MS Fragmentation of **MVSHHNLTTGATLINEQWLLTTAKNLFNLHSEENATAK**

Found in **J3QR68** in **con\_Xuniprot\_HUMAN3**, J3QR68\_HUMAN Haptoglobin (Fragment) OS=Homo sapiens GN=HP PE=3 SV=1

Match to Query 28931: 4138.051136 from(1035.520060,4+) intensity(10934.0068) rtinseconds(2663) scans(7011) index(24905)

Title: 111019\_Est\_MI\_YS\_G\_06Spectrum6124\_scans\_\_7011

Data file C:\mascot\20140703\_Tmgf\_1D\CSV\_UseAnalysis\MasterCSV\All\_Glyco\mgf\ptm\UC18ERLIC\_PTM\_35D.mgf

Click mouse within plot area to zoom in by factor of two about that point

Or, to Da

Label all possible matches Label matches used for scoring

Show Y-axis

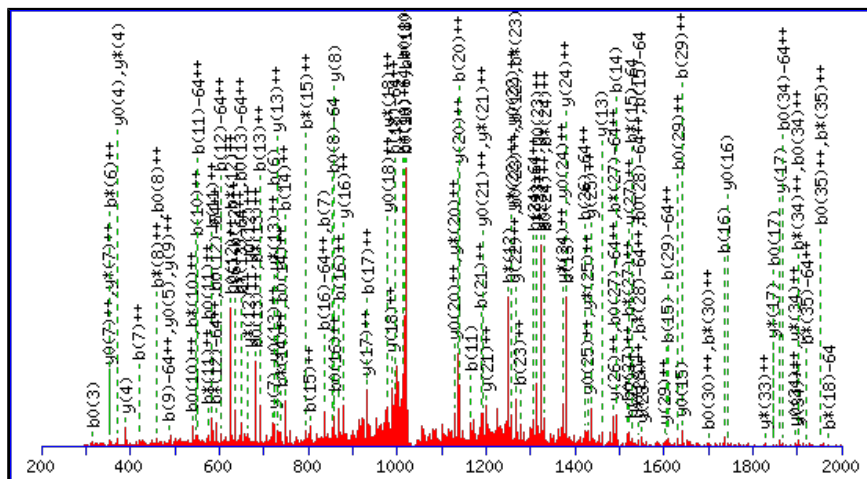

Monoisotopic mass of neutral peptide Mr(calc): 4138.0317

Fixed modifications: Carbamidomethyl (C) (apply to specified residues or termini only)

Variable modifications:

M1 : Oxidation (M), with neutral losses 0.0000 (shown in table), 63.9983

N6 : Deamidated (NQ)

Q17 : Deamidated (NQ)

N25 : Deamidated (NQ)

N33 : Deamidated (NQ)

Ions Score: 76 Expect: 5.1e-006

Matches : 132/616 fragment ions using 154 most intense peaks (help)

| #  | b                | b <sup>++</sup>  | b <sup>*</sup>   | b <sup>*++</sup> | b <sup>0</sup>   | b <sup>0++</sup> | Seq.     | y                | y <sup>++</sup>  | y <sup>*</sup>   | y <sup>*++</sup> | y <sup>0</sup> | y <sup>0++</sup> | #         |
|----|------------------|------------------|------------------|------------------|------------------|------------------|----------|------------------|------------------|------------------|------------------|----------------|------------------|-----------|
| 1  | 148.0427         | 74.5250          |                  |                  |                  |                  | <b>M</b> |                  |                  |                  |                  |                |                  | <b>37</b> |
| 2  | 247.1111         | 124.0592         |                  |                  |                  |                  | <b>V</b> | 3992.0036        | 1996.5054        | 3974.9771        | 1987.9922        | 3973.9930      | 1987.5002        | <b>36</b> |
| 3  | 334.1431         | 167.5752         |                  |                  | <b>316.1326</b>  | 158.5699         | <b>S</b> | 3892.9352        | 1946.9712        | 3875.9086        | 1938.4580        | 3874.9246      | 1937.9660        | <b>35</b> |
| 4  | 471.2020         | 236.1047         |                  |                  | 453.1915         | 227.0994         | <b>H</b> | 3805.9032        | <b>1903.4552</b> | 3788.8766        | <b>1894.9419</b> | 3787.8926      | <b>1894.4499</b> | <b>34</b> |
| 5  | 608.2609         | 304.6341         |                  |                  | 590.2504         | 295.6288         | <b>H</b> | 3668.8443        | 1834.9258        | 3651.8177        | <b>1826.4125</b> | 3650.8337      | 1825.9205        | <b>33</b> |
| 6  | <b>723.2879</b>  | 362.1476         | 706.2613         | <b>353.6343</b>  | 705.2773         | 353.1423         | <b>N</b> | 3531.7853        | 1766.3963        | 3514.7588        | 1757.8830        | 3513.7748      | 1757.3910        | <b>32</b> |
| 7  | <b>836.3719</b>  | <b>418.6896</b>  | 819.3454         | 410.1763         | 818.3614         | 409.6843         | <b>L</b> | 3416.7584        | 1708.8828        | 3399.7318        | 1700.3696        | 3398.7478      | 1699.8776        | <b>31</b> |
| 8  | 937.4196         | 469.2135         | 920.3931         | <b>460.7002</b>  | 919.4091         | <b>460.2082</b>  | <b>T</b> | 3303.6743        | 1652.3408        | 3286.6478        | 1643.8275        | 3285.6638      | 1643.3355        | <b>30</b> |
| 9  | 1038.4673        | 519.7373         | 1021.4408        | 511.2240         | <b>1020.4567</b> | 510.7320         | <b>T</b> | 3202.6267        | <b>1601.8170</b> | 3185.6001        | 1593.3037        | 3184.6161      | 1592.8117        | <b>29</b> |
| 10 | 1095.4888        | <b>548.2480</b>  | 1078.4622        | <b>539.7347</b>  | 1077.4782        | <b>539.2427</b>  | <b>G</b> | 3101.5790        | <b>1551.2931</b> | 3084.5524        | <b>1542.7799</b> | 3083.5684      | 1542.2878        | <b>28</b> |
| 11 | <b>1166.5259</b> | <b>583.7666</b>  | 1149.4993        | <b>575.2533</b>  | 1148.5153        | <b>574.7613</b>  | <b>A</b> | 3044.5575        | <b>1522.7824</b> | 3027.5310        | 1514.2691        | 3026.5469      | 1513.7771        | <b>27</b> |
| 12 | <b>1267.5736</b> | <b>634.2904</b>  | <b>1250.5470</b> | <b>625.7771</b>  | 1249.5630        | <b>625.2851</b>  | <b>T</b> | 2973.5204        | <b>1487.2638</b> | 2956.4938        | 1478.7506        | 2955.5098      | 1478.2586        | <b>26</b> |
| 13 | <b>1380.6576</b> | <b>690.8325</b>  | 1363.6311        | <b>682.3192</b>  | 1362.6471        | <b>681.8272</b>  | <b>L</b> | 2872.4727        | <b>1436.7400</b> | 2855.4462        | <b>1428.2267</b> | 2854.4622      | <b>1427.7347</b> | <b>25</b> |
| 14 | <b>1493.7417</b> | <b>747.3745</b>  | 1476.7151        | <b>738.8612</b>  | 1475.7311        | <b>738.3692</b>  | <b>I</b> | 2759.3887        | <b>1380.1980</b> | 2742.3621        | <b>1371.6847</b> | 2741.3781      | <b>1371.1927</b> | <b>24</b> |
| 15 | <b>1607.7846</b> | <b>804.3959</b>  | 1590.7581        | <b>795.8827</b>  | 1589.7741        | 795.3907         | <b>N</b> | 2646.3046        | <b>1323.6559</b> | 2629.2780        | <b>1315.1427</b> | 2628.2940      | <b>1314.6506</b> | <b>23</b> |
| 16 | <b>1736.8272</b> | <b>868.9172</b>  | 1719.8007        | 860.4040         | 1718.8166        | <b>859.9120</b>  | <b>E</b> | 2532.2617        | <b>1266.6345</b> | 2515.2351        | <b>1258.1212</b> | 2514.2511      | <b>1257.6292</b> | <b>22</b> |
| 17 | 1865.8698        | <b>933.4385</b>  | 1848.8433        | 924.9253         | <b>1847.8592</b> | 924.4333         | <b>Q</b> | 2403.2191        | <b>1202.1132</b> | 2386.1925        | <b>1193.5999</b> | 2385.2085      | <b>1193.1079</b> | <b>21</b> |
| 18 | 2051.9491        | 1026.4782        | 2034.9226        | <b>1017.9649</b> | 2033.9386        | <b>1017.4729</b> | <b>W</b> | 2274.1765        | <b>1137.5919</b> | 2257.1499        | <b>1129.0786</b> | 2256.1659      | <b>1128.5866</b> | <b>20</b> |
| 19 | 2165.0332        | 1083.0202        | 2148.0066        | 1074.5070        | 2147.0226        | 1074.0149        | <b>L</b> | 2088.0972        | 1044.5522        | 2071.0706        | 1036.0389        | 2070.0866      | 1035.5469        | <b>19</b> |
| 20 | 2278.1172        | <b>1139.5623</b> | 2261.0907        | 1131.0490        | 2260.1067        | 1130.5570        | <b>L</b> | 1975.0131        | <b>988.0102</b>  | 1957.9865        | <b>979.4969</b>  | 1957.0025      | <b>979.0049</b>  | <b>18</b> |
| 21 | 2379.1649        | <b>1190.0861</b> | 2362.1384        | 1181.5728        | 2361.1544        | 1181.0808        | <b>T</b> | <b>1861.9290</b> | <b>931.4682</b>  | <b>1844.9025</b> | 922.9549         | 1843.9185      | 922.4629         | <b>17</b> |

|    |           |           |           |           |           |           |   |           |          |           |          |           |          |    |
|----|-----------|-----------|-----------|-----------|-----------|-----------|---|-----------|----------|-----------|----------|-----------|----------|----|
| 22 | 2480.2126 | 1240.6099 | 2463.1861 | 1232.0967 | 2462.2020 | 1231.6047 | T | 1760.8814 | 880.9443 | 1743.8548 | 872.4310 | 1742.8708 | 871.9390 | 16 |
| 23 | 2551.2497 | 1276.1285 | 2534.2232 | 1267.6152 | 2533.2392 | 1267.1232 | A | 1659.8337 | 830.4205 | 1642.8071 | 821.9072 | 1641.8231 | 821.4152 | 15 |
| 24 | 2679.3447 | 1340.1760 | 2662.3181 | 1331.6627 | 2661.3341 | 1331.1707 | K | 1588.7966 | 794.9019 | 1571.7700 | 786.3886 | 1570.7860 | 785.8966 | 14 |
| 25 | 2794.3716 | 1397.6895 | 2777.3451 | 1389.1762 | 2776.3611 | 1388.6842 | N | 1460.7016 | 730.8544 | 1443.6751 | 722.3412 | 1442.6910 | 721.8492 | 13 |
| 26 | 2907.4557 | 1454.2315 | 2890.4291 | 1445.7182 | 2889.4451 | 1445.2262 | L | 1345.6747 | 673.3410 | 1328.6481 | 664.8277 | 1327.6641 | 664.3357 | 12 |
| 27 | 3054.5241 | 1527.7657 | 3037.4976 | 1519.2524 | 3036.5135 | 1518.7604 | F | 1232.5906 | 616.7989 | 1215.5640 | 608.2857 | 1214.5800 | 607.7937 | 11 |
| 28 | 3167.6082 | 1584.3077 | 3150.5816 | 1575.7944 | 3149.5976 | 1575.3024 | L | 1085.5222 | 543.2647 | 1068.4956 | 534.7515 | 1067.5116 | 534.2594 | 10 |
| 29 | 3281.6511 | 1641.3292 | 3264.6245 | 1632.8159 | 3263.6405 | 1632.3239 | N | 972.4381  | 486.7227 | 955.4116  | 478.2094 | 954.4275  | 477.7174 | 9  |
| 30 | 3418.7100 | 1709.8586 | 3401.6835 | 1701.3454 | 3400.6994 | 1700.8534 | H | 858.3952  | 429.7012 | 841.3686  | 421.1880 | 840.3846  | 420.6959 | 8  |
| 31 | 3505.7420 | 1753.3747 | 3488.7155 | 1744.8614 | 3487.7315 | 1744.3694 | S | 721.3363  | 361.1718 | 704.3097  | 352.6585 | 703.3257  | 352.1665 | 7  |
| 32 | 3634.7846 | 1817.8960 | 3617.7581 | 1809.3827 | 3616.7741 | 1808.8907 | E | 634.3042  | 317.6558 | 617.2777  | 309.1425 | 616.2937  | 308.6505 | 6  |
| 33 | 3749.8116 | 1875.4094 | 3732.7850 | 1866.8961 | 3731.8010 | 1866.4041 | N | 505.2617  | 253.1345 | 488.2351  | 244.6212 | 487.2511  | 244.1292 | 5  |
| 34 | 3820.8487 | 1910.9280 | 3803.8221 | 1902.4147 | 3802.8381 | 1901.9227 | A | 390.2347  | 195.6210 | 373.2082  | 187.1077 | 372.2241  | 186.6157 | 4  |
| 35 | 3921.8964 | 1961.4518 | 3904.8698 | 1952.9385 | 3903.8858 | 1952.4465 | T | 319.1976  | 160.1024 | 302.1710  | 151.5892 | 301.1870  | 151.0972 | 3  |
| 36 | 3992.9335 | 1996.9704 | 3975.9069 | 1988.4571 | 3974.9229 | 1987.9651 | A | 218.1499  | 109.5786 | 201.1234  | 101.0653 |           |          | 2  |
| 37 |           |           |           |           |           |           | K | 147.1128  | 74.0600  | 130.0863  | 65.5468  |           |          | 1  |

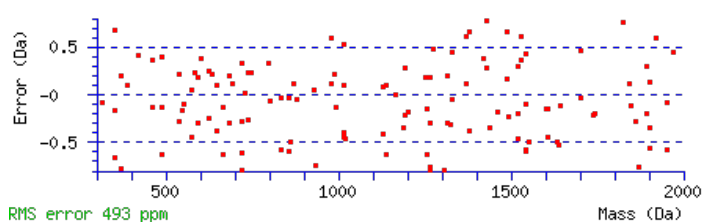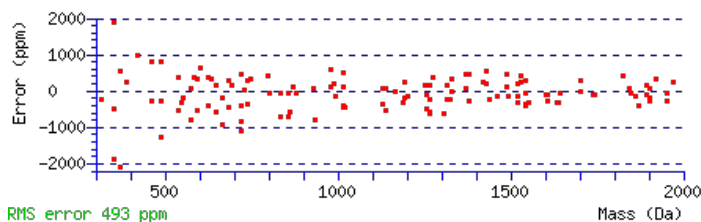

NCBI BLAST search of [MVSHHNLTGATLINEQWLLTTAKNLFNLHSEENATAK](#)

(Parameters: blastp, nr protein database, expect=20000, no filter, PAM30)

Other BLAST [web gateways](#)

All matches to this query

| Score | Mr(calc)  | Delta  | Sequence                                              | Site Analysis                       |
|-------|-----------|--------|-------------------------------------------------------|-------------------------------------|
| 76.4  | 4138.0317 | 0.0195 | <a href="#">MVSHHNLTGATLINEQWLLTTAKNLFNLHSEENATAK</a> | Deamidated N6, Q17, N25, N33 22.87% |
| 75.6  | 4138.0317 | 0.0195 | <a href="#">MVSHHNLTGATLINEQWLLTTAKNLFNLHSEENATAK</a> | Deamidated N6, Q17, N29, N33 19.06% |
| 75.6  | 4138.0317 | 0.0195 | <a href="#">MVSHHNLTGATLINEQWLLTTAKNLFNLHSEENATAK</a> | Deamidated N6, N15, N25, N33 18.98% |
| 74.8  | 4138.0317 | 0.0195 | <a href="#">MVSHHNLTGATLINEQWLLTTAKNLFNLHSEENATAK</a> | Deamidated N6, N15, N29, N33 15.86% |
| 74.7  | 4136.0636 | 1.9875 | <a href="#">MVSHHNLTGATLINEQWLLTTAKNLFNLHSEENATAK</a> |                                     |
| 71.2  | 4138.0317 | 0.0195 | <a href="#">MVSHHNLTGATLINEQWLLTTAKNLFNLHSEENATAK</a> | Deamidated N6, N15, Q17, N33 6.89%  |
| 67.9  | 4137.0477 | 1.0035 | <a href="#">MVSHHNLTGATLINEQWLLTTAKNLFNLHSEENATAK</a> |                                     |
| 66.0  | 4137.0477 | 1.0035 | <a href="#">MVSHHNLTGATLINEQWLLTTAKNLFNLHSEENATAK</a> |                                     |
| 65.9  | 4138.0317 | 0.0195 | <a href="#">MVSHHNLTGATLINEQWLLTTAKNLFNLHSEENATAK</a> | Deamidated N15, Q17, N25, N33 2.04% |
| 65.8  | 4136.0636 | 1.9875 | <a href="#">MVSHHNLTGATLINEQWLLTTAKNLFNLHSEENATAK</a> |                                     |

Mascot: <http://www.matrixscience.com/>

# MATRIX SCIENCE Mascot Search Results

## Peptide View

MS/MS Fragmentation of **MVSHHNLTTGATLINEQWLLTTAKNLFNLHSENATAK**

Found in **J3QR68** in **con\_Xuniprot\_HUMAN3**, J3QR68\_HUMAN Haptoglobin (Fragment) OS=Homo sapiens GN=HP PE=3 SV=1

Match to Query 28946: 4138.076376 from(1035.526370,4+) intensity(0.0000) rtinseconds(2604) scans(6541) index(12110)

Title: 111019\_Est\_ISCardio\_NMI\_YS\_G\_8Spectrum5686\_scans\_\_6541

Data file C:\mascot\20140703\_Tmgf\_1D\CSV\_UseAnalysis\MasterCSV\All\_Glyco\mgf\ptm\UC18ERLIC\_PTM\_35D.mgf

Click mouse within plot area to zoom in by factor of two about that point

Or, to Da

Label all possible matches Label matches used for scoring

Show Y-axis

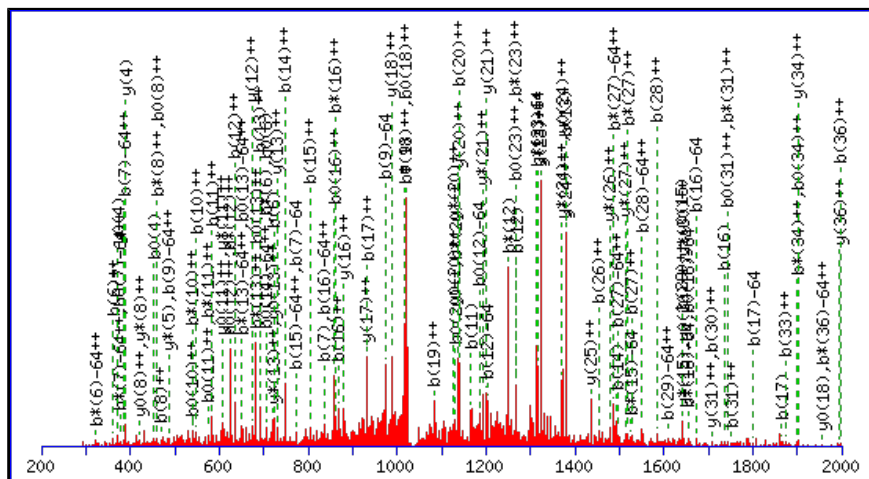

Monoisotopic mass of neutral peptide Mr(calc): 4136.0636

Fixed modifications: Carbamidomethyl (C) (apply to specified residues or termini only)

Variable modifications:

M1 : Oxidation (M), with neutral losses 0.0000 (shown in table), 63.9983

N6 : Deamidated (NQ)

N25 : Deamidated (NQ)

Ions Score: 75 Expect: 6e-006

Matches : 116/616 fragment ions using 175 most intense peaks (help)

| #  | b         | b <sup>++</sup> | b <sup>*</sup> | b <sup>*++</sup> | b <sup>0</sup> | b <sup>0++</sup> | Seq. | y         | y <sup>++</sup> | y <sup>*</sup> | y <sup>*++</sup> | y <sup>0</sup> | y <sup>0++</sup> | #  |
|----|-----------|-----------------|----------------|------------------|----------------|------------------|------|-----------|-----------------|----------------|------------------|----------------|------------------|----|
| 1  | 148.0427  | 74.5250         |                |                  |                |                  | M    |           |                 |                |                  |                |                  | 37 |
| 2  | 247.1111  | 124.0592        |                |                  |                |                  | V    | 3990.0356 | 1995.5214       | 3973.0090      | 1987.0081        | 3972.0250      | 1986.5161        | 36 |
| 3  | 334.1431  | 167.5752        |                |                  | 316.1326       | 158.5699         | S    | 3890.9672 | 1945.9872       | 3873.9406      | 1937.4739        | 3872.9566      | 1936.9819        | 35 |
| 4  | 471.2020  | 236.1047        |                |                  | 453.1915       | 227.0994         | H    | 3803.9351 | 1902.4712       | 3786.9086      | 1893.9579        | 3785.9246      | 1893.4659        | 34 |
| 5  | 608.2609  | 304.6341        |                |                  | 590.2504       | 295.6288         | H    | 3666.8762 | 1833.9417       | 3649.8497      | 1825.4285        | 3648.8657      | 1824.9365        | 33 |
| 6  | 723.2879  | 362.1476        | 706.2613       | 353.6343         | 705.2773       | 353.1423         | N    | 3529.8173 | 1765.4123       | 3512.7908      | 1756.8990        | 3511.8067      | 1756.4070        | 32 |
| 7  | 836.3719  | 418.6896        | 819.3454       | 410.1763         | 818.3614       | 409.6843         | L    | 3414.7904 | 1707.8988       | 3397.7638      | 1699.3855        | 3396.7798      | 1698.8935        | 31 |
| 8  | 937.4196  | 469.2135        | 920.3931       | 460.7002         | 919.4091       | 460.2082         | T    | 3301.7063 | 1651.3568       | 3284.6798      | 1642.8435        | 3283.6957      | 1642.3515        | 30 |
| 9  | 1038.4673 | 519.7373        | 1021.4408      | 511.2240         | 1020.4567      | 510.7320         | T    | 3200.6586 | 1600.8329       | 3183.6321      | 1592.3197        | 3182.6481      | 1591.8277        | 29 |
| 10 | 1095.4888 | 548.2480        | 1078.4622      | 539.7347         | 1077.4782      | 539.2427         | G    | 3099.6109 | 1550.3091       | 3082.5844      | 1541.7958        | 3081.6004      | 1541.3038        | 28 |
| 11 | 1166.5259 | 583.7666        | 1149.4993      | 575.2533         | 1148.5153      | 574.7613         | A    | 3042.5895 | 1521.7984       | 3025.5629      | 1513.2851        | 3024.5789      | 1512.7931        | 27 |
| 12 | 1267.5736 | 634.2904        | 1250.5470      | 625.7771         | 1249.5630      | 625.2851         | T    | 2971.5524 | 1486.2798       | 2954.5258      | 1477.7665        | 2953.5418      | 1477.2745        | 26 |
| 13 | 1380.6576 | 690.8325        | 1363.6311      | 682.3192         | 1362.6471      | 681.8272         | L    | 2870.5047 | 1435.7560       | 2853.4781      | 1427.2427        | 2852.4941      | 1426.7507        | 25 |
| 14 | 1493.7417 | 747.3745        | 1476.7151      | 738.8612         | 1475.7311      | 738.3692         | I    | 2757.4206 | 1379.2139       | 2740.3941      | 1370.7007        | 2739.4101      | 1370.2087        | 24 |
| 15 | 1607.7846 | 804.3959        | 1590.7581      | 795.8827         | 1589.7741      | 795.3907         | N    | 2644.3366 | 1322.6719       | 2627.3100      | 1314.1586        | 2626.3260      | 1313.6666        | 23 |
| 16 | 1736.8272 | 868.9172        | 1719.8007      | 860.4040         | 1718.8166      | 859.9120         | E    | 2530.2936 | 1265.6505       | 2513.2671      | 1257.1372        | 2512.2831      | 1256.6452        | 22 |
| 17 | 1864.8858 | 932.9465        | 1847.8592      | 924.4333         | 1846.8752      | 923.9413         | Q    | 2401.2510 | 1201.1292       | 2384.2245      | 1192.6159        | 2383.2405      | 1192.1239        | 21 |
| 18 | 2050.9651 | 1025.9862       | 2033.9386      | 1017.4729        | 2032.9545      | 1016.9809        | W    | 2273.1925 | 1137.0999       | 2256.1659      | 1128.5866        | 2255.1819      | 1128.0946        | 20 |
| 19 | 2164.0492 | 1082.5282       | 2147.0226      | 1074.0149        | 2146.0386      | 1073.5229        | L    | 2087.1131 | 1044.0602       | 2070.0866      | 1035.5469        | 2069.1026      | 1035.0549        | 19 |
| 20 | 2277.1332 | 1139.0703       | 2260.1067      | 1130.5570        | 2259.1227      | 1130.0650        | L    | 1974.0291 | 987.5182        | 1957.0025      | 979.0049         | 1956.0185      | 978.5129         | 18 |
| 21 | 2378.1809 | 1189.5941       | 2361.1544      | 1181.0808        | 2360.1703      | 1180.5888        | T    | 1860.9450 | 930.9761        | 1843.9185      | 922.4629         | 1842.9345      | 921.9709         | 17 |
| 22 | 2479.2286 | 1240.1179       | 2462.2020      | 1231.6047        | 2461.2180      | 1231.1126        | T    | 1759.8973 | 880.4523        | 1742.8708      | 871.9390         | 1741.8868      | 871.4470         | 16 |



|    |           |           |           |           |           |           |   |           |          |           |          |           |          |    |
|----|-----------|-----------|-----------|-----------|-----------|-----------|---|-----------|----------|-----------|----------|-----------|----------|----|
| 23 | 2550.2657 | 1275.6365 | 2533.2392 | 1267.1232 | 2532.2551 | 1266.6312 | A | 1658.8497 | 829.9285 | 1641.8231 | 821.4152 | 1640.8391 | 820.9232 | 15 |
| 24 | 2678.3607 | 1339.6840 | 2661.3341 | 1331.1707 | 2660.3501 | 1330.6787 | K | 1587.8125 | 794.4099 | 1570.7860 | 785.8966 | 1569.8020 | 785.4046 | 14 |
| 25 | 2793.3876 | 1397.1974 | 2776.3611 | 1388.6842 | 2775.3770 | 1388.1922 | N | 1459.7176 | 730.3624 | 1442.6910 | 721.8492 | 1441.7070 | 721.3571 | 13 |
| 26 | 2906.4717 | 1453.7395 | 2889.4451 | 1445.2262 | 2888.4611 | 1444.7342 | L | 1344.6906 | 672.8490 | 1327.6641 | 664.3357 | 1326.6801 | 663.8437 | 12 |
| 27 | 3053.5401 | 1527.2737 | 3036.5135 | 1518.7604 | 3035.5295 | 1518.2684 | F | 1231.6066 | 616.3069 | 1214.5800 | 607.7937 | 1213.5960 | 607.3016 | 11 |
| 28 | 3166.6242 | 1583.8157 | 3149.5976 | 1575.3024 | 3148.6136 | 1574.8104 | L | 1084.5382 | 542.7727 | 1067.5116 | 534.2594 | 1066.5276 | 533.7674 | 10 |
| 29 | 3280.6671 | 1640.8372 | 3263.6405 | 1632.3239 | 3262.6565 | 1631.8319 | N | 971.4541  | 486.2307 | 954.4275  | 477.7174 | 953.4435  | 477.2254 | 9  |
| 30 | 3417.7260 | 1709.3666 | 3400.6994 | 1700.8534 | 3399.7154 | 1700.3614 | H | 857.4112  | 429.2092 | 840.3846  | 420.6959 | 839.4006  | 420.2039 | 8  |
| 31 | 3504.7580 | 1752.8826 | 3487.7315 | 1744.3694 | 3486.7475 | 1743.8774 | S | 720.3523  | 360.6798 | 703.3257  | 352.1665 | 702.3417  | 351.6745 | 7  |
| 32 | 3633.8006 | 1817.4039 | 3616.7741 | 1808.8907 | 3615.7900 | 1808.3987 | E | 633.3202  | 317.1638 | 616.2937  | 308.6505 | 615.3097  | 308.1585 | 6  |
| 33 | 3747.8435 | 1874.4254 | 3730.8170 | 1865.9121 | 3729.8330 | 1865.4201 | N | 504.2776  | 252.6425 | 487.2511  | 244.1292 | 486.2671  | 243.6372 | 5  |
| 34 | 3818.8807 | 1909.9440 | 3801.8541 | 1901.4307 | 3800.8701 | 1900.9387 | A | 390.2347  | 195.6210 | 373.2082  | 187.1077 | 372.2241  | 186.6157 | 4  |
| 35 | 3919.9283 | 1960.4678 | 3902.9018 | 1951.9545 | 3901.9178 | 1951.4625 | T | 319.1976  | 160.1024 | 302.1710  | 151.5892 | 301.1870  | 151.0972 | 3  |
| 36 | 3990.9654 | 1995.9864 | 3973.9389 | 1987.4731 | 3972.9549 | 1986.9811 | A | 218.1499  | 109.5786 | 201.1234  | 101.0653 |           |          | 2  |
| 37 |           |           |           |           |           |           | K | 147.1128  | 74.0600  | 130.0863  | 65.5468  |           |          | 1  |

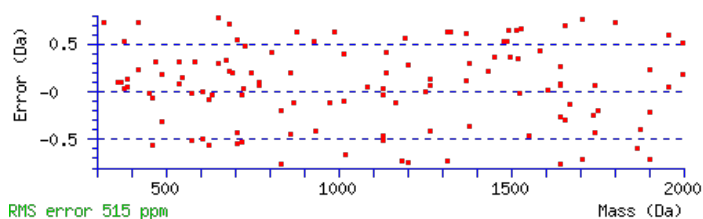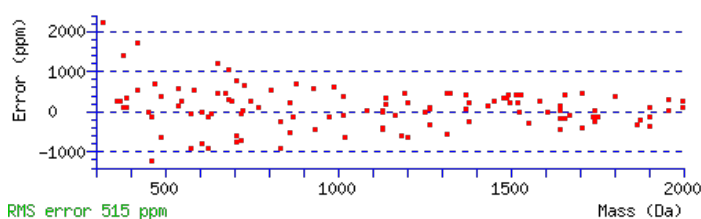

NCBI BLAST search of [MVSHHNLTTGATLINEQWLLTTAKNLFNHSENATAK](#)

(Parameters: blastp, nr protein database, expect=20000, no filter, PAM30)

Other BLAST [web gateways](#)

All matches to this query

| Score | Mr(calc)  | Delta  | Sequence                                             | Site Analysis             |
|-------|-----------|--------|------------------------------------------------------|---------------------------|
| 75.0  | 4136.0636 | 2.0127 | <a href="#">MVSHHNLTTGATLINEQWLLTTAKNLFNHSENATAK</a> | Deamidated N6, N25 40.49% |
| 69.8  | 4136.0636 | 2.0127 | <a href="#">MVSHHNLTTGATLINEQWLLTTAKNLFNHSENATAK</a> | Deamidated N6, Q17 12.40% |
| 68.6  | 4136.0636 | 2.0127 | <a href="#">MVSHHNLTTGATLINEQWLLTTAKNLFNHSENATAK</a> | Deamidated N25, N33 9.43% |
| 67.8  | 4136.0636 | 2.0127 | <a href="#">MVSHHNLTTGATLINEQWLLTTAKNLFNHSENATAK</a> | Deamidated Q17, N33 7.81% |
| 67.8  | 4136.0636 | 2.0127 | <a href="#">MVSHHNLTTGATLINEQWLLTTAKNLFNHSENATAK</a> | Deamidated N29, N33 7.77% |
| 67.4  | 4136.0636 | 2.0127 | <a href="#">MVSHHNLTTGATLINEQWLLTTAKNLFNHSENATAK</a> | Deamidated N6, N15 7.12%  |
| 65.7  | 4136.0636 | 2.0127 | <a href="#">MVSHHNLTTGATLINEQWLLTTAKNLFNHSENATAK</a> | Deamidated N6, N33 4.77%  |
| 63.4  | 4136.0636 | 2.0127 | <a href="#">MVSHHNLTTGATLINEQWLLTTAKNLFNHSENATAK</a> | Deamidated Q17, N25 2.85% |
| 62.9  | 4136.0636 | 2.0127 | <a href="#">MVSHHNLTTGATLINEQWLLTTAKNLFNHSENATAK</a> | Deamidated N6, N29 2.50%  |
| 58.8  | 4136.0636 | 2.0127 | <a href="#">MVSHHNLTTGATLINEQWLLTTAKNLFNHSENATAK</a> | Deamidated N15, N33 0.98% |

Mascot: <http://www.matrixscience.com/>

# MATRIX SCIENCE Mascot Search Results

## Peptide View

MS/MS Fragmentation of **VVLHPNYSQVDIGLIK**

Found in **H3BS21** in **con\_Xuniprot\_HUMAN3**, H3BS21\_HUMAN Haptoglobin (Fragment) OS=Homo sapiens GN=HP PE=2 SV=1

Match to Query 10209: 1794.988002 from(599.336610,3+) intensity(991268.6875) rtinseconds(1743) scans(3673) index(21908)

Title: 111019\_Est\_MI\_YP\_G\_15Spectrum3167\_scans\_\_3673

Data file C:\\mascot\\20140703\_Tmgf\_1D\\CSV\_UseAnalysis\\MasterCSV\\All\_Glyco\\mgf\\ptm\\UC18ERLIC\_PTM\_35D.mgf

Click mouse within plot area to zoom in by factor of two about that point

Or, to Da

Label all possible matches Label matches used for scoring

Show Y-axis

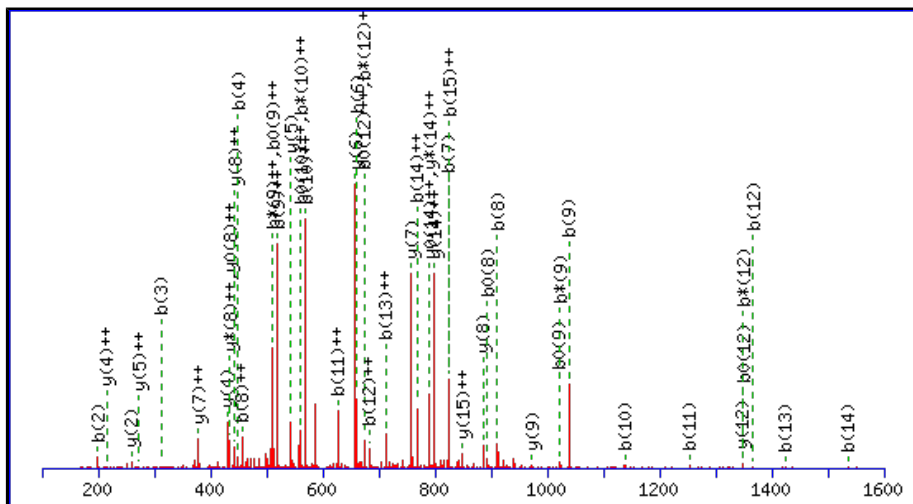

Monoisotopic mass of neutral peptide Mr(calc): 1794.9880

Fixed modifications: Carbamidomethyl (C) (apply to specified residues or termini only)

Variable modifications:

N6 : Deamidated (NQ)

Ions Score: 73 Expect: 4.8e-006

Matches : 50/146 fragment ions using 78 most intense peaks ([help](#))

| #  | b                | b <sup>++</sup> | b <sup>*</sup>   | b <sup>*++</sup> | b <sup>0</sup>   | b <sup>0++</sup> | Seq. | y                | y <sup>++</sup> | y <sup>*</sup> | y <sup>*++</sup> | y <sup>0</sup> | y <sup>0++</sup> | #  |
|----|------------------|-----------------|------------------|------------------|------------------|------------------|------|------------------|-----------------|----------------|------------------|----------------|------------------|----|
| 1  | 100.0757         | 50.5415         |                  |                  |                  |                  | V    |                  |                 |                |                  |                |                  | 16 |
| 2  | <b>199.1441</b>  | 100.0757        |                  |                  |                  |                  | V    | 1696.9268        | <b>848.9671</b> | 1679.9003      | 840.4538         | 1678.9163      | 839.9618         | 15 |
| 3  | <b>312.2282</b>  | 156.6177        |                  |                  |                  |                  | L    | 1597.8584        | <b>799.4329</b> | 1580.8319      | <b>790.9196</b>  | 1579.8479      | <b>790.4276</b>  | 14 |
| 4  | <b>449.2871</b>  | 225.1472        |                  |                  |                  |                  | H    | 1484.7744        | 742.8908        | 1467.7478      | 734.3775         | 1466.7638      | 733.8855         | 13 |
| 5  | 546.3398         | 273.6736        |                  |                  |                  |                  | P    | <b>1347.7155</b> | <b>674.3614</b> | 1330.6889      | 665.8481         | 1329.7049      | 665.3561         | 12 |
| 6  | <b>661.3668</b>  | 331.1870        | 644.3402         | 322.6738         |                  |                  | N    | 1250.6627        | 625.8350        | 1233.6361      | 617.3217         | 1232.6521      | 616.8297         | 11 |
| 7  | <b>824.4301</b>  | 412.7187        | 807.4036         | 404.2054         |                  |                  | Y    | 1135.6358        | 568.3215        | 1118.6092      | 559.8082         | 1117.6252      | 559.3162         | 10 |
| 8  | <b>911.4621</b>  | <b>456.2347</b> | 894.4356         | 447.7214         | <b>893.4516</b>  | 447.2294         | S    | <b>972.5724</b>  | 486.7898        | 955.5459       | 478.2766         | 954.5619       | 477.7846         | 9  |
| 9  | <b>1039.5207</b> | <b>520.2640</b> | <b>1022.4942</b> | <b>511.7507</b>  | <b>1021.5102</b> | <b>511.2587</b>  | Q    | <b>885.5404</b>  | <b>443.2738</b> | 868.5138       | <b>434.7606</b>  | 867.5298       | <b>434.2686</b>  | 8  |
| 10 | <b>1138.5891</b> | <b>569.7982</b> | 1121.5626        | <b>561.2849</b>  | 1120.5786        | <b>560.7929</b>  | V    | <b>757.4818</b>  | <b>379.2445</b> | 740.4553       | 370.7313         | 739.4713       | 370.2393         | 7  |
| 11 | <b>1253.6161</b> | <b>627.3117</b> | 1236.5895        | 618.7984         | 1235.6055        | 618.3064         | D    | <b>658.4134</b>  | 329.7103        | 641.3869       | 321.1971         | 640.4028       | 320.7051         | 6  |
| 12 | <b>1366.7001</b> | <b>683.8537</b> | 1349.6736        | <b>675.3404</b>  | <b>1348.6896</b> | <b>674.8484</b>  | I    | <b>543.3865</b>  | <b>272.1969</b> | 526.3599       | 263.6836         |                |                  | 5  |
| 13 | <b>1423.7216</b> | <b>712.3644</b> | 1406.6951        | 703.8512         | 1405.7110        | 703.3592         | G    | <b>430.3024</b>  | <b>215.6548</b> | 413.2758       | 207.1416         |                |                  | 4  |
| 14 | <b>1536.8057</b> | <b>768.9065</b> | 1519.7791        | 760.3932         | 1518.7951        | 759.9012         | L    | 373.2809         | 187.1441        | 356.2544       | 178.6308         |                |                  | 3  |
| 15 | 1649.8897        | <b>825.4485</b> | 1632.8632        | 816.9352         | 1631.8792        | 816.4432         | I    | <b>260.1969</b>  | 130.6021        | 243.1703       | 122.0888         |                |                  | 2  |
| 16 |                  |                 |                  |                  |                  |                  | K    | 147.1128         | 74.0600         | 130.0863       | 65.5468          |                |                  | 1  |

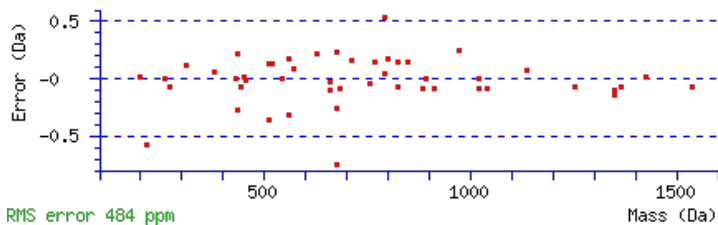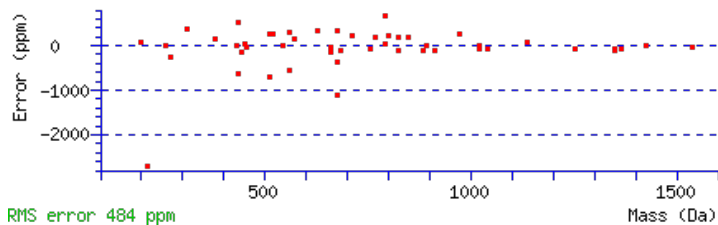

NCBI **BLAST** search of [VVLHPNYSQVDIGLIK](#)

(Parameters: blastp, nr protein database, expect=20000, no filter, PAM30)

Other BLAST [web gateways](#)

**All matches to this query**

| Score | Mr(calc)  | Delta   | Sequence                           | Site Analysis        |
|-------|-----------|---------|------------------------------------|----------------------|
| 73.5  | 1794.9880 | 0.0000  | <a href="#">VVLHPNYSQVDIGLIK</a>   | Deamidated N6 99.50% |
| 50.5  | 1794.9880 | 0.0000  | <a href="#">VVLHPNYSQVDIGLIK</a>   | Deamidated Q9 0.50%  |
| 8.9   | 1793.9887 | 0.9993  | <a href="#">LDELLGKDHTQVVSLK</a>   |                      |
| 8.5   | 1792.9795 | 2.0085  | <a href="#">NQLANVPSGKAGKPVGVR</a> |                      |
| 8.5   | 1792.9795 | 2.0085  | <a href="#">NQLANVPSGKAGKPVGVR</a> |                      |
| 6.5   | 1792.9835 | 2.0045  | <a href="#">QLEQRLWSPLQGLK</a>     |                      |
| 6.1   | 1794.9814 | 0.0066  | <a href="#">VNWRSGVEPIVLAPMK</a>   |                      |
| 5.4   | 1794.9886 | -0.0006 | <a href="#">LAAGMAKVGAVIKSHNGR</a> |                      |
| 4.5   | 1793.9774 | 1.0106  | <a href="#">QLEQSIIPDIPAKDVK</a>   |                      |
| 4.5   | 1793.9774 | 1.0106  | <a href="#">QLEQSIIPDIPAKDVK</a>   |                      |

Mascot: <http://www.matrixscience.com/>

# MATRIX SCIENCE Mascot Search Results

## Peptide View

MS/MS Fragmentation of **MVSHHNLTTGATLINEQWLLTTAKNLFNLHSEENATAK**

Found in **J3QR68** in **con\_Xuniprot\_HUMAN3**, J3QR68\_HUMAN Haptoglobin (Fragment) OS=Homo sapiens GN=HP PE=3 SV=1

Match to Query 28628: 4122.088032 from(1375.036620,3+) intensity(0.0000) rtinseconds(2412) scans(6154) index(12859)

Title: 111019\_Est\_ISCardio\_NMI\_YS\_G\_9Spectrum5408\_scans\_\_6154

Data file C:\mascot\20140703\_Tmgf\_1D\CSV\_UseAnalysis\MasterCSV\All\_Glyco\mgf\ptm\UC18ERLIC\_PTM\_35D.mgf

Click mouse within plot area to zoom in by factor of two about that point

Or, to Da

Label all possible matches Label matches used for scoring

Show Y-axis

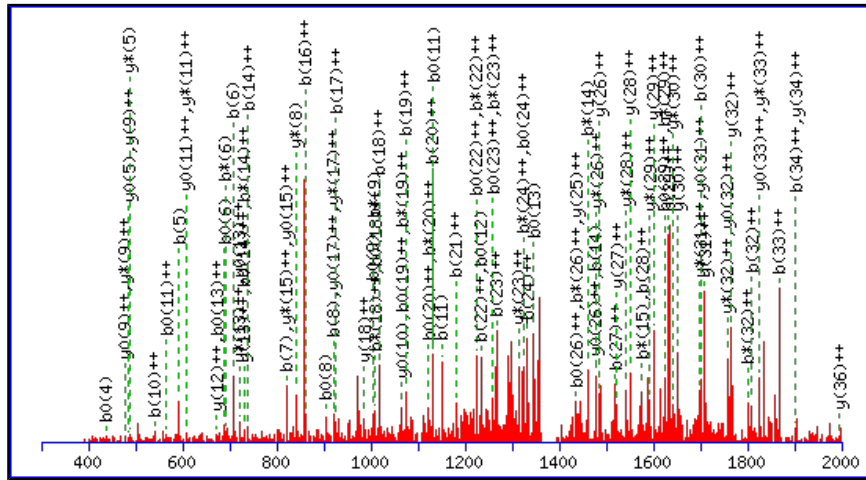

Monoisotopic mass of neutral peptide Mr(calc): 4120.0687

Fixed modifications: Carbamidomethyl (C) (apply to specified residues or termini only)

Variable modifications:

N6 : Deamidated (NQ)

Q17 : Deamidated (NQ)

Ions Score: 72 Expect: 9.9e-006

Matches : 96/414 fragment ions using 165 most intense peaks ([help](#))

| #  | b                | b <sup>++</sup>  | b <sup>*</sup>   | b <sup>*++</sup> | b <sup>0</sup>   | b <sup>0++</sup> | Seq.     | y         | y <sup>++</sup>  | y <sup>*</sup> | y <sup>*++</sup> | y <sup>0</sup> | y <sup>0++</sup> | #  |
|----|------------------|------------------|------------------|------------------|------------------|------------------|----------|-----------|------------------|----------------|------------------|----------------|------------------|----|
| 1  | 132.0478         | 66.5275          |                  |                  |                  |                  | <b>M</b> |           |                  |                |                  |                |                  | 37 |
| 2  | 231.1162         | 116.0617         |                  |                  |                  |                  | <b>V</b> | 3990.0356 | <b>1995.5214</b> | 3973.0090      | 1987.0081        | 3972.0250      | 1986.5161        | 36 |
| 3  | 318.1482         | 159.5777         |                  |                  | 300.1376         | 150.5725         | <b>S</b> | 3890.9672 | 1945.9872        | 3873.9406      | 1937.4739        | 3872.9566      | 1936.9819        | 35 |
| 4  | 455.2071         | 228.1072         |                  |                  | <b>437.1966</b>  | 219.1019         | <b>H</b> | 3803.9351 | <b>1902.4712</b> | 3786.9086      | 1893.9579        | 3785.9246      | 1893.4659        | 34 |
| 5  | <b>592.2660</b>  | 296.6367         |                  |                  | 574.2555         | 287.6314         | <b>H</b> | 3666.8762 | 1833.9417        | 3649.8497      | <b>1825.4285</b> | 3648.8657      | <b>1824.9365</b> | 33 |
| 6  | <b>707.2930</b>  | 354.1501         | <b>690.2664</b>  | 345.6368         | <b>689.2824</b>  | 345.1448         | <b>N</b> | 3529.8173 | <b>1765.4123</b> | 3512.7908      | <b>1756.8990</b> | 3511.8067      | <b>1756.4070</b> | 32 |
| 7  | <b>820.3770</b>  | 410.6922         | 803.3505         | 402.1789         | 802.3665         | 401.6869         | <b>L</b> | 3414.7904 | <b>1707.8988</b> | 3397.7638      | <b>1699.3855</b> | 3396.7798      | <b>1698.8935</b> | 31 |
| 8  | <b>921.4247</b>  | 461.2160         | 904.3982         | 452.7027         | <b>903.4141</b>  | 452.2107         | <b>T</b> | 3301.7063 | <b>1651.3568</b> | 3284.6798      | <b>1642.8435</b> | 3283.6957      | 1642.3515        | 30 |
| 9  | 1022.4724        | 511.7398         | <b>1005.4458</b> | 503.2266         | <b>1004.4618</b> | 502.7346         | <b>T</b> | 3200.6586 | <b>1600.8329</b> | 3183.6321      | <b>1592.3197</b> | 3182.6481      | 1591.8277        | 29 |
| 10 | 1079.4939        | <b>540.2506</b>  | 1062.4673        | 531.7373         | 1061.4833        | 531.2453         | <b>G</b> | 3099.6109 | <b>1550.3091</b> | 3082.5844      | <b>1541.7958</b> | 3081.6004      | 1541.3038        | 28 |
| 11 | <b>1150.5310</b> | 575.7691         | 1133.5044        | 567.2558         | <b>1132.5204</b> | <b>566.7638</b>  | <b>A</b> | 3042.5895 | <b>1521.7984</b> | 3025.5629      | 1513.2851        | 3024.5789      | 1512.7931        | 27 |
| 12 | 1251.5786        | 626.2930         | 1234.5521        | 617.7797         | <b>1233.5681</b> | 617.2877         | <b>T</b> | 2971.5524 | <b>1486.2798</b> | 2954.5258      | <b>1477.7665</b> | 2953.5418      | <b>1477.2745</b> | 26 |
| 13 | 1364.6627        | 682.8350         | 1347.6362        | 674.3217         | <b>1346.6521</b> | <b>673.8297</b>  | <b>L</b> | 2870.5047 | <b>1435.7560</b> | 2853.4781      | 1427.2427        | 2852.4941      | 1426.7507        | 25 |
| 14 | <b>1477.7468</b> | <b>739.3770</b>  | <b>1460.7202</b> | <b>730.8638</b>  | 1459.7362        | <b>730.3717</b>  | <b>I</b> | 2757.4206 | 1379.2139        | 2740.3941      | 1370.7007        | 2739.4101      | 1370.2087        | 24 |
| 15 | 1591.7897        | 796.3985         | <b>1574.7632</b> | 787.8852         | 1573.7791        | 787.3932         | <b>N</b> | 2644.3366 | 1322.6719        | 2627.3100      | <b>1314.1586</b> | 2626.3260      | 1313.6666        | 23 |
| 16 | 1720.8323        | <b>860.9198</b>  | 1703.8057        | 852.4065         | 1702.8217        | 851.9145         | <b>E</b> | 2530.2936 | 1265.6505        | 2513.2671      | 1257.1372        | 2512.2831      | 1256.6452        | 22 |
| 17 | 1849.8749        | <b>925.4411</b>  | 1832.8483        | 916.9278         | 1831.8643        | 916.4358         | <b>Q</b> | 2401.2510 | 1201.1292        | 2384.2245      | 1192.6159        | 2383.2405      | 1192.1239        | 21 |
| 18 | 2035.9542        | <b>1018.4807</b> | 2018.9277        | <b>1009.9675</b> | 2017.9436        | <b>1009.4755</b> | <b>W</b> | 2272.2084 | 1136.6079        | 2255.1819      | 1128.0946        | 2254.1979      | 1127.6026        | 20 |
| 19 | 2149.0383        | <b>1075.0228</b> | 2132.0117        | <b>1066.5095</b> | 2131.0277        | <b>1066.0175</b> | <b>L</b> | 2086.1291 | 1043.5682        | 2069.1026      | 1035.0549        | 2068.1186      | 1034.5629        | 19 |
| 20 | 2262.1223        | <b>1131.5648</b> | 2245.0958        | <b>1123.0515</b> | 2244.1118        | <b>1122.5595</b> | <b>L</b> | 1973.0451 | <b>987.0262</b>  | 1956.0185      | 978.5129         | 1955.0345      | 978.0209         | 18 |
| 21 | 2363.1700        | <b>1182.0886</b> | 2346.1435        | 1173.5754        | 2345.1594        | 1173.0834        | <b>T</b> | 1859.9610 | 930.4841         | 1842.9345      | <b>921.9709</b>  | 1841.9504      | <b>921.4789</b>  | 17 |
| 22 | 2464.2177        | <b>1232.6125</b> | 2447.1911        | <b>1224.0992</b> | 2446.2071        | <b>1223.6072</b> | <b>T</b> | 1758.9133 | 879.9603         | 1741.8868      | 871.4470         | 1740.9028      | 870.9550         | 16 |

|    |           |                  |           |                  |           |                  |   |           |                 |                 |                 |                  |                 |    |
|----|-----------|------------------|-----------|------------------|-----------|------------------|---|-----------|-----------------|-----------------|-----------------|------------------|-----------------|----|
| 23 | 2535.2548 | <b>1268.1310</b> | 2518.2283 | <b>1259.6178</b> | 2517.2442 | <b>1259.1258</b> | A | 1657.8656 | 829.4365        | 1640.8391       | <b>820.9232</b> | 1639.8551        | <b>820.4312</b> | 15 |
| 24 | 2663.3498 | <b>1332.1785</b> | 2646.3232 | <b>1323.6652</b> | 2645.3392 | <b>1323.1732</b> | K | 1586.8285 | 793.9179        | 1569.8020       | 785.4046        | 1568.8180        | 784.9126        | 14 |
| 25 | 2777.3927 | 1389.2000        | 2760.3661 | 1380.6867        | 2759.3821 | 1380.1947        | N | 1458.7336 | <b>729.8704</b> | 1441.7070       | <b>721.3571</b> | 1440.7230        | <b>720.8651</b> | 13 |
| 26 | 2890.4768 | 1445.7420        | 2873.4502 | <b>1437.2287</b> | 2872.4662 | <b>1436.7367</b> | L | 1344.6906 | <b>672.8490</b> | 1327.6641       | 664.3357        | 1326.6801        | 663.8437        | 12 |
| 27 | 3037.5452 | <b>1519.2762</b> | 3020.5186 | 1510.7629        | 3019.5346 | 1510.2709        | F | 1231.6066 | 616.3069        | 1214.5800       | <b>607.7937</b> | 1213.5960        | <b>607.3016</b> | 11 |
| 28 | 3150.6292 | <b>1575.8183</b> | 3133.6027 | 1567.3050        | 3132.6187 | 1566.8130        | L | 1084.5382 | 542.7727        | 1067.5116       | 534.2594        | <b>1066.5276</b> | 533.7674        | 10 |
| 29 | 3264.6722 | <b>1632.8397</b> | 3247.6456 | <b>1624.3264</b> | 3246.6616 | <b>1623.8344</b> | N | 971.4541  | <b>486.2307</b> | 954.4275        | <b>477.7174</b> | 953.4435         | <b>477.2254</b> | 9  |
| 30 | 3401.7311 | <b>1701.3692</b> | 3384.7045 | 1692.8559        | 3383.7205 | 1692.3639        | H | 857.4112  | 429.2092        | <b>840.3846</b> | 420.6959        | 839.4006         | 420.2039        | 8  |
| 31 | 3488.7631 | 1744.8852        | 3471.7366 | 1736.3719        | 3470.7525 | 1735.8799        | S | 720.3523  | 360.6798        | 703.3257        | 352.1665        | 702.3417         | 351.6745        | 7  |
| 32 | 3617.8057 | <b>1809.4065</b> | 3600.7791 | <b>1800.8932</b> | 3599.7951 | 1800.4012        | E | 633.3202  | 317.1638        | 616.2937        | 308.6505        | 615.3097         | 308.1585        | 6  |
| 33 | 3731.8486 | <b>1866.4279</b> | 3714.8221 | 1857.9147        | 3713.8381 | 1857.4227        | N | 504.2776  | 252.6425        | <b>487.2511</b> | 244.1292        | <b>486.2671</b>  | 243.6372        | 5  |
| 34 | 3802.8857 | <b>1901.9465</b> | 3785.8592 | 1893.4332        | 3784.8752 | 1892.9412        | A | 390.2347  | 195.6210        | 373.2082        | 187.1077        | 372.2241         | 186.6157        | 4  |
| 35 | 3903.9334 | 1952.4703        | 3886.9069 | 1943.9571        | 3885.9229 | 1943.4651        | T | 319.1976  | 160.1024        | 302.1710        | 151.5892        | 301.1870         | 151.0972        | 3  |
| 36 | 3974.9705 | 1987.9889        | 3957.9440 | 1979.4756        | 3956.9600 | 1978.9836        | A | 218.1499  | 109.5786        | 201.1234        | 101.0653        |                  |                 | 2  |
| 37 |           |                  |           |                  |           |                  | K | 147.1128  | 74.0600         | 130.0863        | 65.5468         |                  |                 | 1  |

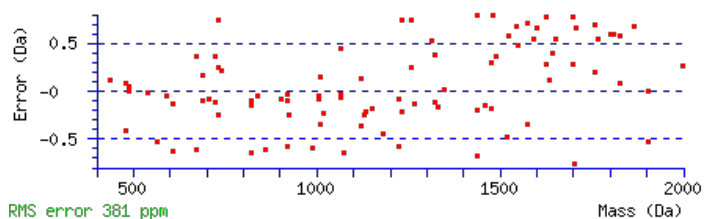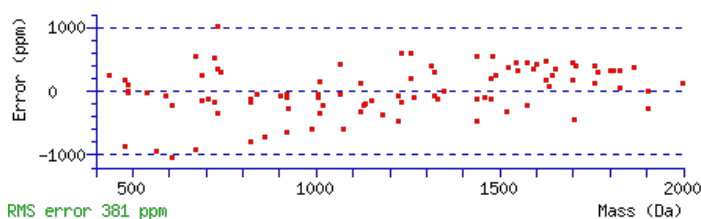

NCBI BLAST search of [MVSHHNLTTGATLINEQWLLTTAKNLFNLHSENATAK](#)

(Parameters: blastp, nr protein database, expect=20000, no filter, PAM30)

Other BLAST [web gateways](#)

All matches to this query

| Score | Mr(calc)  | Delta  | Sequence                                              | Site Analysis             |
|-------|-----------|--------|-------------------------------------------------------|---------------------------|
| 72.3  | 4120.0687 | 2.0193 | <a href="#">MVSHHNLTTGATLINEQWLLTTAKNLFNLHSENATAK</a> | Deamidated N6, Q17 54.45% |
| 66.9  | 4120.0687 | 2.0193 | <a href="#">MVSHHNLTTGATLINEQWLLTTAKNLFNLHSENATAK</a> | Deamidated N6, N15 15.49% |
| 63.9  | 4120.0687 | 2.0193 | <a href="#">MVSHHNLTTGATLINEQWLLTTAKNLFNLHSENATAK</a> | Deamidated N6, N25 7.85%  |
| 63.9  | 4120.0687 | 2.0193 | <a href="#">MVSHHNLTTGATLINEQWLLTTAKNLFNLHSENATAK</a> | Deamidated N6, N29 7.76%  |
| 62.8  | 4120.0687 | 2.0193 | <a href="#">MVSHHNLTTGATLINEQWLLTTAKNLFNLHSENATAK</a> | Deamidated N6, N33 5.98%  |
| 61.1  | 4120.0687 | 2.0193 | <a href="#">MVSHHNLTTGATLINEQWLLTTAKNLFNLHSENATAK</a> | Deamidated N29, N33 4.06% |
| 59.9  | 4120.0687 | 2.0193 | <a href="#">MVSHHNLTTGATLINEQWLLTTAKNLFNLHSENATAK</a> | Deamidated N25, N33 3.13% |
| 50.4  | 4120.0687 | 2.0193 | <a href="#">MVSHHNLTTGATLINEQWLLTTAKNLFNLHSENATAK</a> | Deamidated N15, Q17 0.35% |
| 47.6  | 4120.0687 | 2.0193 | <a href="#">MVSHHNLTTGATLINEQWLLTTAKNLFNLHSENATAK</a> | Deamidated N25, N29 0.18% |
| 46.6  | 4120.0687 | 2.0193 | <a href="#">MVSHHNLTTGATLINEQWLLTTAKNLFNLHSENATAK</a> | Deamidated Q17, N33 0.15% |

Mascot: <http://www.matrixscience.com/>

# MASCOT SCIENCE Mascot Search Results

## Peptide View

MS/MS Fragmentation of **NLFLNHSENATAK**

Found in **H3BS21** in **con\_Xuniprot\_HUMAN3**, H3BS21\_HUMAN Haptoglobin (Fragment) OS=Homo sapiens GN=HP PE=2 SV=1

Match to Query 6182: 1460.680948 from(731.347750,2+) intensity(67967.7500) rtinseconds(928) scans(1839) index(28376)

Title: 111019\_Est\_MI\_YS\_G\_13Spectrum1546\_scans\_\_1839

Data file C:\\mascot\\20140703\_Tmgf\_1D\\CSV\_UseAnalysis\\MasterCSV\\All\_Glyco\\mgf\\ptm\\UC18ERLIC\_PTM\_35D.mgf

Click mouse within plot area to zoom in by factor of two about that point

Or, to Da

Label all possible matches Label matches used for scoring

Show Y-axis

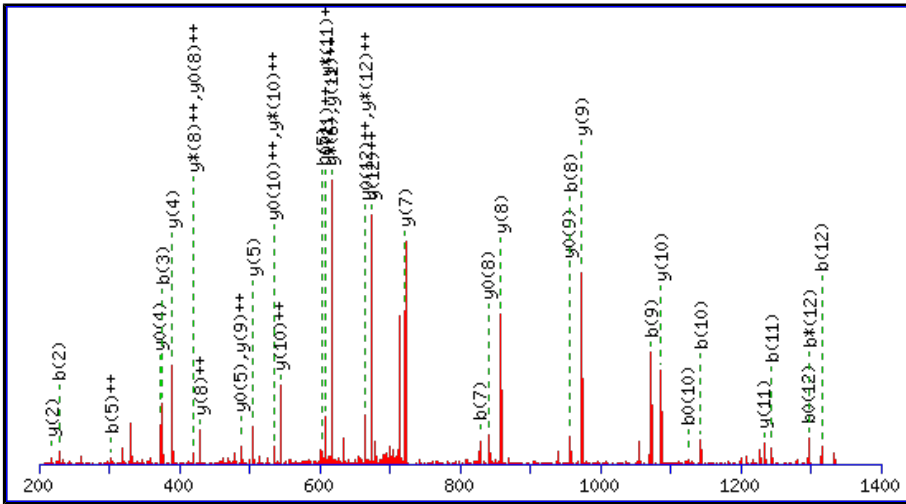

Monoisotopic mass of neutral peptide Mr(calc): 1460.6783

Fixed modifications: Carbamidomethyl (C) (apply to specified residues or termini only)

Variable modifications:

N1 : Deamidated (NQ)

N5 : Deamidated (NQ)

N9 : Deamidated (NQ)

Ions Score: 70 Expect: 1.4e-005

Matches : 39/128 fragment ions using 48 most intense peaks ([help](#))

| #  | b                | b <sup>++</sup> | b <sup>*</sup>   | b <sup>***</sup> | b <sup>0</sup>   | b <sup>0++</sup> | Seq. | y                | y <sup>++</sup> | y <sup>*</sup>  | y <sup>***</sup> | y <sup>0</sup>  | y <sup>0++</sup> | #  |
|----|------------------|-----------------|------------------|------------------|------------------|------------------|------|------------------|-----------------|-----------------|------------------|-----------------|------------------|----|
| 1  | 116.0342         | 58.5207         | 99.0077          | 50.0075          |                  |                  | N    |                  |                 |                 |                  |                 |                  | 13 |
| 2  | <b>229.1183</b>  | 115.0628        | 212.0917         | 106.5495         |                  |                  | L    | 1346.6587        | <b>673.8330</b> | 1329.6321       | <b>665.3197</b>  | 1328.6481       | <b>664.8277</b>  | 12 |
| 3  | <b>376.1867</b>  | 188.5970        | 359.1601         | 180.0837         |                  |                  | F    | <b>1233.5746</b> | <b>617.2909</b> | 1216.5481       | <b>608.7777</b>  | 1215.5640       | <b>608.2857</b>  | 11 |
| 4  | 489.2708         | 245.1390        | 472.2442         | 236.6257         |                  |                  | L    | <b>1086.5062</b> | <b>543.7567</b> | 1069.4796       | <b>535.2435</b>  | 1068.4956       | <b>534.7515</b>  | 10 |
| 5  | <b>604.2977</b>  | <b>302.6525</b> | 587.2712         | 294.1392         |                  |                  | N    | <b>973.4221</b>  | <b>487.2147</b> | 956.3956        | 478.7014         | <b>955.4116</b> | 478.2094         | 9  |
| 6  | 741.3566         | 371.1819        | 724.3301         | 362.6687         |                  |                  | H    | <b>858.3952</b>  | <b>429.7012</b> | 841.3686        | <b>421.1880</b>  | <b>840.3846</b> | <b>420.6959</b>  | 8  |
| 7  | <b>828.3886</b>  | 414.6980        | 811.3621         | 406.1847         | 810.3781         | 405.6927         | S    | <b>721.3363</b>  | 361.1718        | 704.3097        | 352.6585         | 703.3257        | 352.1665         | 7  |
| 8  | <b>957.4312</b>  | 479.2193        | 940.4047         | 470.7060         | 939.4207         | 470.2140         | E    | 634.3042         | 317.6558        | <b>617.2777</b> | 309.1425         | 616.2937        | 308.6505         | 6  |
| 9  | <b>1072.4582</b> | 536.7327        | 1055.4316        | 528.2195         | 1054.4476        | 527.7274         | N    | <b>505.2617</b>  | 253.1345        | 488.2351        | 244.6212         | <b>487.2511</b> | 244.1292         | 5  |
| 10 | <b>1143.4953</b> | 572.2513        | 1126.4687        | 563.7380         | <b>1125.4847</b> | 563.2460         | A    | <b>390.2347</b>  | 195.6210        | 373.2082        | 187.1077         | <b>372.2241</b> | 186.6157         | 4  |
| 11 | <b>1244.5430</b> | 622.7751        | 1227.5164        | 614.2619         | 1226.5324        | 613.7698         | T    | 319.1976         | 160.1024        | 302.1710        | 151.5892         | 301.1870        | 151.0972         | 3  |
| 12 | <b>1315.5801</b> | 658.2937        | <b>1298.5535</b> | 649.7804         | <b>1297.5695</b> | 649.2884         | A    | <b>218.1499</b>  | 109.5786        | 201.1234        | 101.0653         |                 |                  | 2  |
| 13 |                  |                 |                  |                  |                  |                  | K    | 147.1128         | 74.0600         | 130.0863        | 65.5468          |                 |                  | 1  |

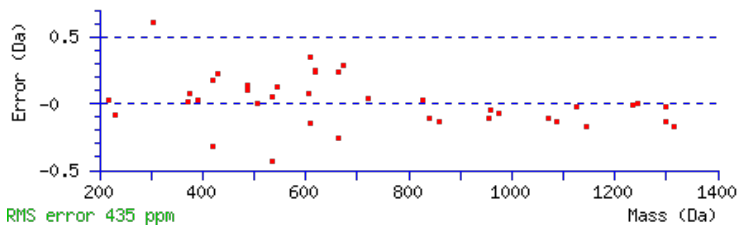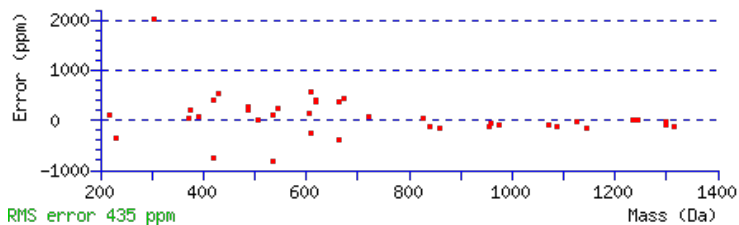

NCBI BLAST search of [NLFLNHSENATAK](#)

(Parameters: blastp, nr protein database, expect=20000, no filter, PAM30)

Other BLAST [web gateways](#)

**All matches to this query**

| Score | Mr(calc)  | Delta   | Sequence                      |
|-------|-----------|---------|-------------------------------|
| 70.3  | 1460.6783 | 0.0027  | <a href="#">NLFLNHSENATAK</a> |
| 19.1  | 1460.6817 | -0.0007 | <a href="#">NCTEELDLNPKK</a>  |
| 16.5  | 1460.6817 | -0.0007 | <a href="#">NNMKIIDPDEEK</a>  |
| 16.3  | 1458.6699 | 2.0111  | <a href="#">EVQENIQDGGRR</a>  |
| 16.1  | 1458.6699 | 2.0111  | <a href="#">EVQENIQDGGRR</a>  |
| 14.5  | 1458.6699 | 2.0111  | <a href="#">EVQENIQDGGRR</a>  |
| 14.1  | 1460.6743 | 0.0066  | <a href="#">QVDANVNTNDKDK</a> |
| 13.1  | 1460.6825 | -0.0016 | <a href="#">EMLYMKEMRAK</a>   |
| 12.8  | 1460.6743 | 0.0066  | <a href="#">QVDANVNTNDKDK</a> |
| 12.5  | 1460.6825 | -0.0016 | <a href="#">QMLYMKEMRAK</a>   |

Mascot: <http://www.matrixscience.com/>



# MATRIX SCIENCE Mascot Search Results

## Peptide View

MS/MS Fragmentation of **NLFLNHSENATAK**

Found in **H3BS21** in **con\_Xuniprot\_HUMAN3**, H3BS21\_HUMAN Haptoglobin (Fragment) OS=Homo sapiens GN=HP PE=2 SV=1

Match to Query 4268: 1458.714108 from(730.364330,2+) intensity(197250.7031) rtinseconds(624) scans(1322) index(2495)

Title: 111019\_Est\_ISCardio\_NMI\_YP\_G\_5Spectrum1113\_scans\_\_1322

Data file C:\\mascot\\20140703\_Tmgf\_1D\\CSV\_UseAnalysis\\MasterCSV\\All\_Glyco\\mgf\\ptm\\UC18ERLIC\_PTM\_35D.mgf

Click mouse within plot area to zoom in by factor of two about that point

Or, to Da

Label all possible matches      Label matches used for scoring

Show Y-axis

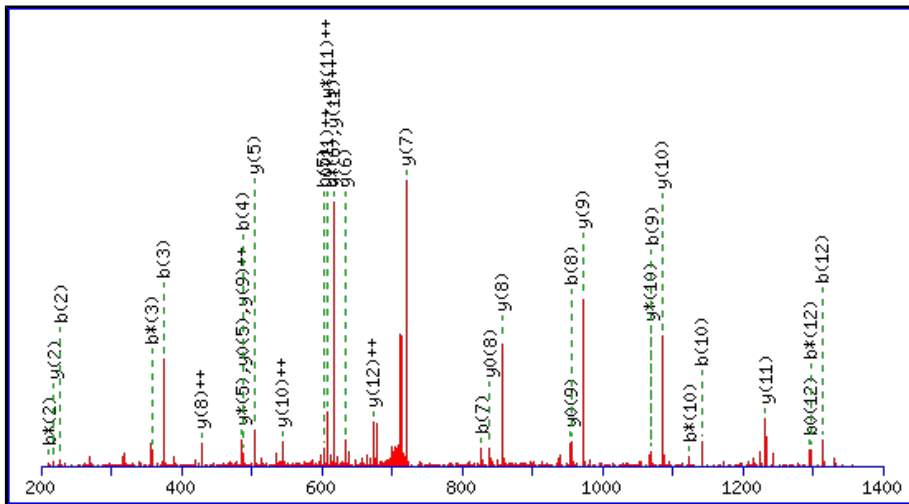

Monoisotopic mass of neutral peptide Mr(calc): 1458.7103

Fixed modifications: Carbamidomethyl (C) (apply to specified residues or termini only)

Variable modifications:

N5 : Deamidated (NQ)

Ions Score: 70      Expect: 1.8e-005

Matches : 35/128 fragment ions using 48 most intense peaks ([help](#))

| #  | b                | b <sup>++</sup> | b <sup>*</sup>   | b <sup>*++</sup> | b <sup>0</sup>   | b <sup>0++</sup> | Seq. | y                | y <sup>++</sup> | y <sup>*</sup>   | y <sup>*++</sup> | y <sup>0</sup>  | y <sup>0++</sup> | #  |
|----|------------------|-----------------|------------------|------------------|------------------|------------------|------|------------------|-----------------|------------------|------------------|-----------------|------------------|----|
| 1  | 115.0502         | 58.0287         | 98.0237          | 49.5155          |                  |                  | N    |                  |                 |                  |                  |                 |                  | 13 |
| 2  | <b>228.1343</b>  | 114.5708        | <b>211.1077</b>  | 106.0575         |                  |                  | L    | 1345.6747        | <b>673.3410</b> | 1328.6481        | 664.8277         | 1327.6641       | 664.3357         | 12 |
| 3  | <b>375.2027</b>  | 188.1050        | <b>358.1761</b>  | 179.5917         |                  |                  | F    | <b>1232.5906</b> | <b>616.7989</b> | 1215.5640        | <b>608.2857</b>  | 1214.5800       | <b>607.7937</b>  | 11 |
| 4  | <b>488.2867</b>  | 244.6470        | 471.2602         | 236.1337         |                  |                  | L    | <b>1085.5222</b> | <b>543.2647</b> | <b>1068.4956</b> | 534.7515         | 1067.5116       | 534.2594         | 10 |
| 5  | <b>603.3137</b>  | 302.1605        | 586.2871         | 293.6472         |                  |                  | N    | <b>972.4381</b>  | <b>486.7227</b> | 955.4116         | 478.2094         | <b>954.4275</b> | 477.7174         | 9  |
| 6  | 740.3726         | 370.6899        | 723.3461         | 362.1767         |                  |                  | H    | <b>857.4112</b>  | <b>429.2092</b> | 840.3846         | 420.6959         | <b>839.4006</b> | 420.2039         | 8  |
| 7  | <b>827.4046</b>  | 414.2060        | 810.3781         | 405.6927         | 809.3941         | 405.2007         | S    | <b>720.3523</b>  | 360.6798        | 703.3257         | 352.1665         | 702.3417        | 351.6745         | 7  |
| 8  | <b>956.4472</b>  | 478.7272        | 939.4207         | 470.2140         | 938.4367         | 469.7220         | E    | <b>633.3202</b>  | 317.1638        | <b>616.2937</b>  | 308.6505         | 615.3097        | 308.1585         | 6  |
| 9  | <b>1070.4901</b> | 535.7487        | 1053.4636        | 527.2354         | 1052.4796        | 526.7434         | N    | <b>504.2776</b>  | 252.6425        | <b>487.2511</b>  | 244.1292         | <b>486.2671</b> | 243.6372         | 5  |
| 10 | <b>1141.5273</b> | 571.2673        | <b>1124.5007</b> | 562.7540         | 1123.5167        | 562.2620         | A    | 390.2347         | 195.6210        | 373.2082         | 187.1077         | 372.2241        | 186.6157         | 4  |
| 11 | 1242.5749        | 621.7911        | 1225.5484        | 613.2778         | 1224.5644        | 612.7858         | T    | 319.1976         | 160.1024        | 302.1710         | 151.5892         | 301.1870        | 151.0972         | 3  |
| 12 | <b>1313.6121</b> | 657.3097        | <b>1296.5855</b> | 648.7964         | <b>1295.6015</b> | 648.3044         | A    | <b>218.1499</b>  | 109.5786        | 201.1234         | 101.0653         |                 |                  | 2  |
| 13 |                  |                 |                  |                  |                  |                  | K    | 147.1128         | 74.0600         | 130.0863         | 65.5468          |                 |                  | 1  |

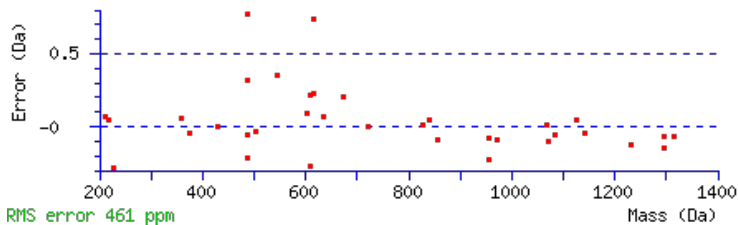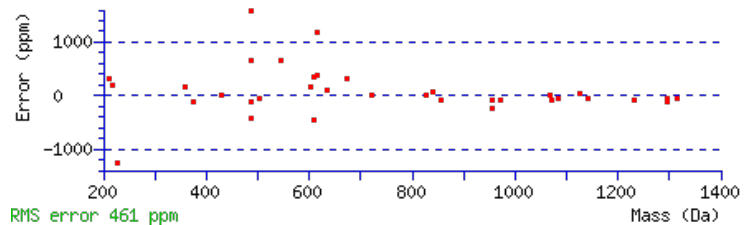

NCBI **BLAST** search of [NLFLNHSENATAK](#)

(Parameters: blastp, nr protein database, expect=20000, no filter, PAM30)

Other BLAST [web gateways](#)

**All matches to this query**

| Score | Mr(calc)  | Delta   | Sequence                       | Site Analysis        |
|-------|-----------|---------|--------------------------------|----------------------|
| 70.3  | 1458.7103 | 0.0038  | <a href="#">NLFLNHSENATAK</a>  | Deamidated N5 99.54% |
| 46.7  | 1458.7103 | 0.0038  | <a href="#">NLFLNHSENATAK</a>  | Deamidated N9 0.44%  |
| 34.1  | 1458.7103 | 0.0038  | <a href="#">NLFLNHSENATAK</a>  | Deamidated N1 0.02%  |
| 21.0  | 1458.7089 | 0.0052  | <a href="#">LNQNELELENLK</a>   |                      |
| 20.1  | 1458.7202 | -0.0060 | <a href="#">EDLEKPNETQKK</a>   |                      |
| 17.8  | 1458.7089 | 0.0052  | <a href="#">DAGLLNQLQELDK</a>  |                      |
| 13.1  | 1458.7202 | -0.0060 | <a href="#">RVAQQEQELDIK</a>   |                      |
| 13.1  | 1458.7103 | 0.0038  | <a href="#">SSSGWISHNKLNK</a>  |                      |
| 13.0  | 1458.7089 | 0.0052  | <a href="#">IEDLENEIEEVK</a>   |                      |
| 12.3  | 1457.7038 | 1.0103  | <a href="#">EANGLGPOGFPELK</a> |                      |

**Mascot:** <http://www.matrixscience.com/>

# MASCOT SCIENCE Mascot Search Results

## Peptide View

MS/MS Fragmentation of **NLFLNHSENAKDIAPTLTLYVGKK**

Found in **H3BS21** in **con\_Xuniprot\_HUMAN3**, H3BS21\_HUMAN Haptoglobin (Fragment) OS=Homo sapiens GN=HP PE=2 SV=1

Match to Query 25843: 2859.509376 from(715.884620,4+) intensity(866449.8125) rtinseconds(1764) scans(4544) index(15913)

Title: 111019\_Est\_ML\_YP\_G\_05Spectrum3869\_scans\_\_4544

Data file C:\mascot\20140703\_Tmgf\_1D\CSV\_UseAnalysis\MasterCSV\All\_Glyco\mgf\ptm\UC18ERLIC\_PTM\_35D.mgf

Click mouse within plot area to zoom in by factor of two about that point

Or, to Da

Label all possible matches Label matches used for scoring

Show Y-axis

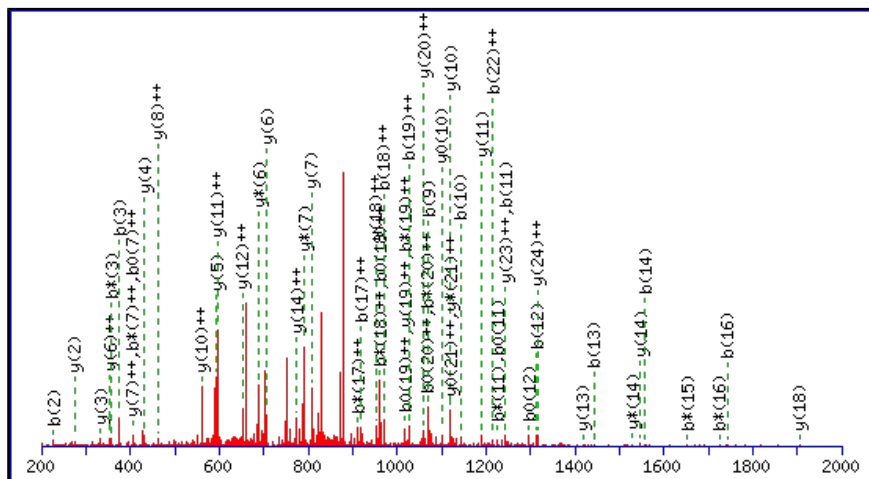

Monoisotopic mass of neutral peptide Mr(calc): 2859.5018

Fixed modifications: Carbamidomethyl (C) (apply to specified residues or termini only)

Variable modifications:

N5 : Deamidated (NQ)

N9 : Deamidated (NQ)

Ions Score: 66 Expect: 3.5e-005

Matches : 57/276 fragment ions using 98 most intense peaks ([help](#))

| #  | b                | b <sup>++</sup>  | b <sup>*</sup>   | b <sup>*++</sup> | b <sup>0</sup>   | b <sup>0++</sup> | Seq. | y                | y <sup>++</sup>  | y <sup>*</sup>   | y <sup>*++</sup> | y <sup>0</sup>   | y <sup>0++</sup> | #  |
|----|------------------|------------------|------------------|------------------|------------------|------------------|------|------------------|------------------|------------------|------------------|------------------|------------------|----|
| 1  | 115.0502         | 58.0287          | 98.0237          | 49.5155          |                  |                  | N    |                  |                  |                  |                  |                  |                  | 26 |
| 2  | <b>228.1343</b>  | 114.5708         | 211.1077         | 106.0575         |                  |                  | L    | 2746.4662        | 1373.7367        | 2729.4396        | 1365.2235        | 2728.4556        | 1364.7314        | 25 |
| 3  | <b>375.2027</b>  | 188.1050         | <b>358.1761</b>  | 179.5917         |                  |                  | F    | 2633.3821        | <b>1317.1947</b> | 2616.3556        | 1308.6814        | 2615.3715        | 1308.1894        | 24 |
| 4  | 488.2867         | 244.6470         | 471.2602         | 236.1337         |                  |                  | L    | 2486.3137        | <b>1243.6605</b> | 2469.2871        | 1235.1472        | 2468.3031        | 1234.6552        | 23 |
| 5  | 603.3137         | 302.1605         | 586.2871         | 293.6472         |                  |                  | N    | 2373.2296        | 1187.1185        | 2356.2031        | 1178.6052        | 2355.2191        | 1178.1132        | 22 |
| 6  | 740.3726         | 370.6899         | 723.3461         | 362.1767         |                  |                  | H    | 2258.2027        | 1129.6050        | 2241.1761        | <b>1121.0917</b> | 2240.1921        | <b>1120.5997</b> | 21 |
| 7  | 827.4046         | 414.2060         | 810.3781         | <b>405.6927</b>  | 809.3941         | <b>405.2007</b>  | S    | 2121.1438        | <b>1061.0755</b> | 2104.1172        | 1052.5623        | 2103.1332        | 1052.0702        | 20 |
| 8  | 956.4472         | 478.7272         | 939.4207         | 470.2140         | 938.4367         | 469.7220         | E    | 2034.1118        | <b>1017.5595</b> | 2017.0852        | 1009.0462        | 2016.1012        | 1008.5542        | 19 |
| 9  | <b>1071.4742</b> | 536.2407         | 1054.4476        | 527.7274         | 1053.4636        | 527.2354         | N    | <b>1905.0692</b> | <b>953.0382</b>  | 1888.0426        | 944.5249         | 1887.0586        | 944.0329         | 18 |
| 10 | <b>1142.5113</b> | 571.7593         | 1125.4847        | 563.2460         | 1124.5007        | 562.7540         | A    | 1790.0422        | 895.5247         | 1773.0157        | 887.0115         | 1772.0316        | 886.5195         | 17 |
| 11 | <b>1243.5590</b> | 622.2831         | <b>1226.5324</b> | 613.7698         | <b>1225.5484</b> | 613.2778         | T    | 1719.0051        | 860.0062         | 1701.9786        | 851.4929         | 1700.9945        | 851.0009         | 16 |
| 12 | <b>1314.5961</b> | 657.8017         | 1297.5695        | 649.2884         | <b>1296.5855</b> | 648.7964         | A    | 1617.9574        | 809.4823         | 1600.9309        | 800.9691         | 1599.9469        | 800.4771         | 15 |
| 13 | <b>1442.6910</b> | 721.8492         | 1425.6645        | 713.3359         | 1424.6805        | 712.8439         | K    | <b>1546.9203</b> | <b>773.9638</b>  | <b>1529.8938</b> | 765.4505         | 1528.9097        | 764.9585         | 14 |
| 14 | <b>1557.7180</b> | 779.3626         | 1540.6914        | 770.8494         | 1539.7074        | 770.3573         | D    | <b>1418.8253</b> | 709.9163         | 1401.7988        | 701.4030         | 1400.8148        | 700.9110         | 13 |
| 15 | 1670.8020        | 835.9047         | <b>1653.7755</b> | 827.3914         | 1652.7915        | 826.8994         | I    | 1303.7984        | <b>652.4028</b>  | 1286.7719        | 643.8896         | 1285.7878        | 643.3976         | 12 |
| 16 | <b>1741.8392</b> | 871.4232         | <b>1724.8126</b> | 862.9099         | 1723.8286        | 862.4179         | A    | <b>1190.7143</b> | <b>595.8608</b>  | 1173.6878        | 587.3475         | 1172.7038        | 586.8555         | 11 |
| 17 | 1838.8919        | <b>919.9496</b>  | 1821.8654        | <b>911.4363</b>  | 1820.8814        | 910.9443         | P    | <b>1119.6772</b> | <b>560.3423</b>  | 1102.6507        | 551.8290         | <b>1101.6667</b> | 551.3370         | 10 |
| 18 | 1939.9396        | <b>970.4734</b>  | 1922.9130        | <b>961.9602</b>  | 1921.9290        | <b>961.4682</b>  | T    | 1022.6245        | 511.8159         | 1005.5979        | 503.3026         | 1004.6139        | 502.8106         | 9  |
| 19 | 2053.0237        | <b>1027.0155</b> | 2035.9971        | <b>1018.5022</b> | 2035.0131        | <b>1018.0102</b> | L    | 921.5768         | <b>461.2920</b>  | 904.5502         | 452.7788         | 903.5662         | 452.2867         | 8  |
| 20 | 2154.0713        | 1077.5393        | 2137.0448        | <b>1069.0260</b> | 2136.0608        | <b>1068.5340</b> | T    | <b>808.4927</b>  | <b>404.7500</b>  | <b>791.4662</b>  | 396.2367         | 790.4822         | 395.7447         | 7  |
| 21 | 2267.1554        | 1134.0813        | 2250.1289        | 1125.5681        | 2249.1448        | 1125.0761        | L    | <b>707.4450</b>  | <b>354.2262</b>  | <b>690.4185</b>  | 345.7129         |                  |                  | 6  |
| 22 | 2430.2187        | <b>1215.6130</b> | 2413.1922        | 1207.0997        | 2412.2082        | 1206.6077        | Y    | <b>594.3610</b>  | 297.6841         | 577.3344         | 289.1709         |                  |                  | 5  |

|    |           |           |           |           |           |           |   |          |          |          |          |  |  |   |
|----|-----------|-----------|-----------|-----------|-----------|-----------|---|----------|----------|----------|----------|--|--|---|
| 23 | 2529.2871 | 1265.1472 | 2512.2606 | 1256.6339 | 2511.2766 | 1256.1419 | V | 431.2976 | 216.1525 | 414.2711 | 207.6392 |  |  | 4 |
| 24 | 2586.3086 | 1293.6579 | 2569.2821 | 1285.1447 | 2568.2980 | 1284.6527 | G | 332.2292 | 166.6183 | 315.2027 | 158.1050 |  |  | 3 |
| 25 | 2714.4036 | 1357.7054 | 2697.3770 | 1349.1922 | 2696.3930 | 1348.7001 | K | 275.2078 | 138.1075 | 258.1812 | 129.5942 |  |  | 2 |
| 26 |           |           |           |           |           |           | K | 147.1128 | 74.0600  | 130.0863 | 65.5468  |  |  | 1 |

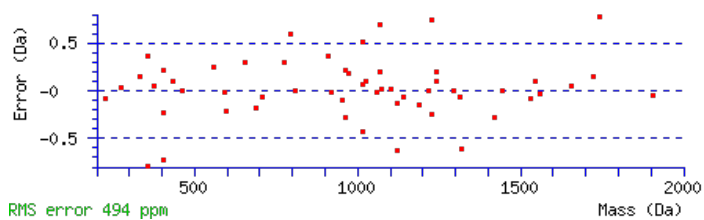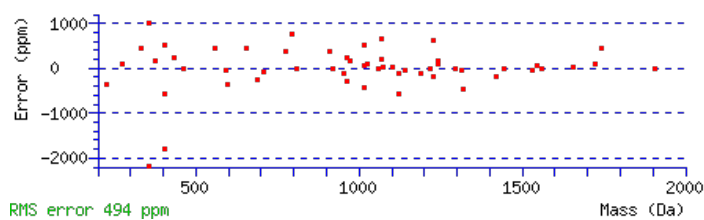

NCBI BLAST search of [NLFLNHSENATAKDIAPTLTYVGKK](#)  
 (Parameters: blastp, nr protein database, expect=20000, no filter, PAM30)  
 Other BLAST [web gateways](#)

All matches to this query

| Score | Mr(calc)  | Delta  | Sequence                                  | Site Analysis            |
|-------|-----------|--------|-------------------------------------------|--------------------------|
| 65.8  | 2859.5018 | 0.0076 | <a href="#">NLFLNHSENATAKDIAPTLTYVGKK</a> | Deamidated N5, N9 68.11% |
| 62.1  | 2859.5018 | 0.0076 | <a href="#">NLFLNHSENATAKDIAPTLTYVGKK</a> | Deamidated N1, N9 28.86% |
| 52.3  | 2859.5018 | 0.0076 | <a href="#">NLFLNHSENATAKDIAPTLTYVGKK</a> | Deamidated N1, N5 3.03%  |
| 48.9  | 2858.5178 | 0.9916 | <a href="#">NLFLNHSENATAKDIAPTLTYVGKK</a> |                          |
| 42.0  | 2858.5178 | 0.9916 | <a href="#">NLFLNHSENATAKDIAPTLTYVGKK</a> |                          |
| 35.5  | 2858.5178 | 0.9916 | <a href="#">NLFLNHSENATAKDIAPTLTYVGKK</a> |                          |
| 8.3   | 2858.4973 | 1.0120 | <a href="#">HKPQAPVIVKTEEVINMHTFNDRR</a>  |                          |

Mascot: <http://www.matrixscience.com/>

# MASCOT SCIENCE Mascot Search Results

## Peptide View

MS/MS Fragmentation of **VVLHPNYSQVDIGLIK**

Found in **H3BS21** in **con\_Xuniprot\_HUMAN3**, H3BS21\_HUMAN Haptoglobin (Fragment) OS=Homo sapiens GN=HP PE=2 SV=1

Match to Query 10831: 1795.974312 from(599.665380,3+) intensity(438026.0938) rtinseconds(1659) scans(3951) index(15149)

Title: 111019\_Est\_MI\_YP\_G\_04Spectrum3388\_scans\_\_3951

Data file C:\\mascot\\20140703\_Tmgf\_1D\\CSV\_UseAnalysis\\MasterCSV\\All\_Glyco\\mgf\\ptm\\UC18ERLIC\_PTM\_35D.mgf

Click mouse within plot area to zoom in by factor of two about that point

Or, to Da

Label all possible matches Label matches used for scoring

Show Y-axis

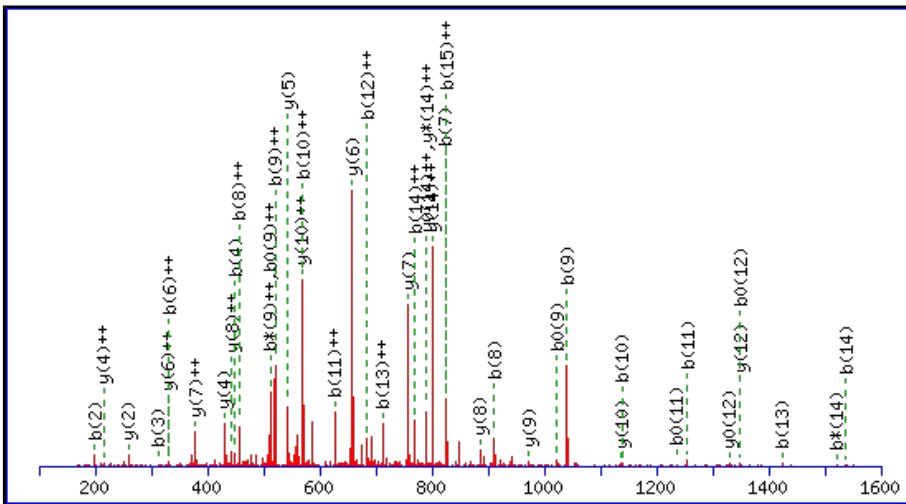

Monoisotopic mass of neutral peptide Mr(calc): 1795.9720

Fixed modifications: Carbamidomethyl (C) (apply to specified residues or termini only)

Variable modifications:

N6 : Deamidated (NQ)

Q9 : Deamidated (NQ)

Ions Score: 66 Expect: 3.6e-005

Matches : 43/146 fragment ions using 69 most intense peaks ([help](#))

| #  | b                | b <sup>++</sup> | b*               | b <sup>*++</sup> | b <sup>0</sup>   | b <sup>0++</sup> | Seq. | y                | y <sup>++</sup> | y*        | y <sup>*++</sup> | y <sup>0</sup>   | y <sup>0++</sup> | #  |
|----|------------------|-----------------|------------------|------------------|------------------|------------------|------|------------------|-----------------|-----------|------------------|------------------|------------------|----|
| 1  | 100.0757         | 50.5415         |                  |                  |                  |                  | V    |                  |                 |           |                  |                  |                  | 16 |
| 2  | <b>199.1441</b>  | 100.0757        |                  |                  |                  |                  | V    | 1697.9109        | 849.4591        | 1680.8843 | 840.9458         | 1679.9003        | 840.4538         | 15 |
| 3  | <b>312.2282</b>  | 156.6177        |                  |                  |                  |                  | L    | 1598.8425        | <b>799.9249</b> | 1581.8159 | <b>791.4116</b>  | 1580.8319        | <b>790.9196</b>  | 14 |
| 4  | <b>449.2871</b>  | 225.1472        |                  |                  |                  |                  | H    | 1485.7584        | 743.3828        | 1468.7318 | 734.8696         | 1467.7478        | 734.3775         | 13 |
| 5  | 546.3398         | 273.6736        |                  |                  |                  |                  | P    | <b>1348.6995</b> | 674.8534        | 1331.6729 | 666.3401         | <b>1330.6889</b> | 665.8481         | 12 |
| 6  | 661.3668         | <b>331.1870</b> | 644.3402         | 322.6738         |                  |                  | N    | 1251.6467        | 626.3270        | 1234.6202 | 617.8137         | 1233.6361        | 617.3217         | 11 |
| 7  | <b>824.4301</b>  | 412.7187        | 807.4036         | 404.2054         |                  |                  | Y    | <b>1136.6198</b> | <b>568.8135</b> | 1119.5932 | 560.3002         | 1118.6092        | 559.8082         | 10 |
| 8  | <b>911.4621</b>  | <b>456.2347</b> | 894.4356         | 447.7214         | 893.4516         | 447.2294         | S    | <b>973.5564</b>  | 487.2819        | 956.5299  | 478.7686         | 955.5459         | 478.2766         | 9  |
| 9  | <b>1040.5047</b> | <b>520.7560</b> | 1023.4782        | <b>512.2427</b>  | <b>1022.4942</b> | <b>511.7507</b>  | Q    | <b>886.5244</b>  | <b>443.7658</b> | 869.4979  | 435.2526         | 868.5138         | 434.7606         | 8  |
| 10 | <b>1139.5732</b> | <b>570.2902</b> | 1122.5466        | 561.7769         | 1121.5626        | 561.2849         | V    | <b>757.4818</b>  | <b>379.2445</b> | 740.4553  | 370.7313         | 739.4713         | 370.2393         | 7  |
| 11 | <b>1254.6001</b> | <b>627.8037</b> | 1237.5735        | 619.2904         | <b>1236.5895</b> | 618.7984         | D    | <b>658.4134</b>  | <b>329.7103</b> | 641.3869  | 321.1971         | 640.4028         | 320.7051         | 6  |
| 12 | 1367.6842        | <b>684.3457</b> | 1350.6576        | 675.8324         | <b>1349.6736</b> | 675.3404         | I    | <b>543.3865</b>  | 272.1969        | 526.3599  | 263.6836         |                  |                  | 5  |
| 13 | <b>1424.7056</b> | <b>712.8564</b> | 1407.6791        | 704.3432         | 1406.6951        | 703.8512         | G    | <b>430.3024</b>  | <b>215.6548</b> | 413.2758  | 207.1416         |                  |                  | 4  |
| 14 | <b>1537.7897</b> | <b>769.3985</b> | <b>1520.7631</b> | 760.8852         | 1519.7791        | 760.3932         | L    | 373.2809         | 187.1441        | 356.2544  | 178.6308         |                  |                  | 3  |
| 15 | 1650.8738        | <b>825.9405</b> | 1633.8472        | 817.4272         | 1632.8632        | 816.9352         | I    | <b>260.1969</b>  | 130.6021        | 243.1703  | 122.0888         |                  |                  | 2  |
| 16 |                  |                 |                  |                  |                  |                  | K    | 147.1128         | 74.0600         | 130.0863  | 65.5468          |                  |                  | 1  |

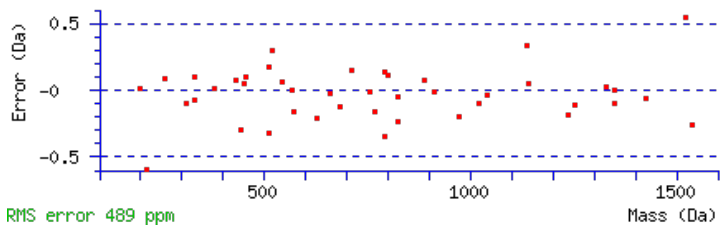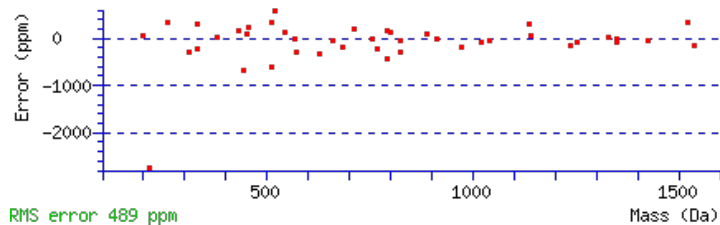

NCBI **BLAST** search of [VVLHPNYSQVDIGLIK](#)

(Parameters: blastp, nr protein database, expect=20000, no filter, PAM30)

Other BLAST [web gateways](#)

**All matches to this query**

| Score | Mr(calc)  | Delta   | Sequence                          |
|-------|-----------|---------|-----------------------------------|
| 65.7  | 1795.9720 | 0.0023  | <a href="#">VVLHPNYSQVDIGLIK</a>  |
| 20.4  | 1795.9792 | -0.0049 | <a href="#">SLVENNPRTGNLGALIK</a> |
| 19.6  | 1795.9792 | -0.0049 | <a href="#">SLVENNPRTGNLGALIK</a> |
| 16.7  | 1795.9792 | -0.0049 | <a href="#">QPDLTSKLRNVSPVNK</a>  |
| 12.7  | 1795.9792 | -0.0049 | <a href="#">AQLQKTLDKISSAHK</a>   |
| 12.7  | 1795.9792 | -0.0049 | <a href="#">AQLQKTLDKISSAHK</a>   |
| 10.1  | 1795.9767 | -0.0024 | <a href="#">LLFMRHIQQRVPEK</a>    |
| 9.8   | 1794.9727 | 1.0016  | <a href="#">LDELLGKDHTQVVSLK</a>  |
| 9.2   | 1793.9748 | 1.9995  | <a href="#">SALRQQOQPTVAGGPKK</a> |
| 9.2   | 1793.9748 | 1.9995  | <a href="#">SALRQQOQPTVAGGPKK</a> |

Mascot: <http://www.matrixscience.com/>

# MASCOT SCIENCE Mascot Search Results

## Peptide View

MS/MS Fragmentation of **MVSHHNLTTGATLINEQWLLTTAKNLFNLHSEENATAK**

Found in **J3QR68** in **con\_Xuniprot\_HUMAN3**, J3QR68\_HUMAN Haptoglobin (Fragment) OS=Homo sapiens GN=HP PE=3 SV=1

Match to Query 28596: 4122.051856 from(1031.520240,4+) intensity(57688.2734) rtinseconds(2539) scans(6368) index(26267)

Title: 111019\_Est\_MI\_YS\_G\_08Spectrum5535\_scans\_\_6368

Data file C:\mascot\20140703\_Tmgf\_1D\CSV\_UseAnalysis\MasterCSV\All\_Glyco\mgf\ptm\UC18ERLIC\_PTM\_35D.mgf

Click mouse within plot area to zoom in by factor of two about that point

Or, to Da

Label all possible matches Label matches used for scoring

Show Y-axis

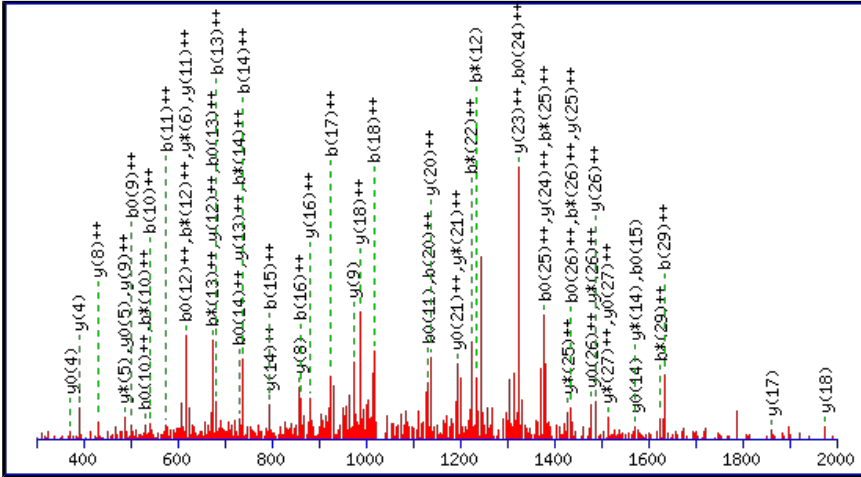

Monoisotopic mass of neutral peptide Mr(calc): 4122.0367

Fixed modifications: Carbamidomethyl (C) (apply to specified residues or termini only)

Variable modifications:

N6 : Deamidated (NQ)

N25 : Deamidated (NQ)

N29 : Deamidated (NQ)

N33 : Deamidated (NQ)

Ions Score: 65 Expect: 6e-005

Matches : 61/414 fragment ions using 68 most intense peaks ([help](#))

| #  | b         | b <sup>++</sup> | b <sup>*</sup> | b <sup>*++</sup> | b <sup>0</sup> | b <sup>0++</sup> | Seq. | y         | y <sup>++</sup> | y <sup>*</sup> | y <sup>*++</sup> | y <sup>0</sup> | y <sup>0++</sup> | #  |
|----|-----------|-----------------|----------------|------------------|----------------|------------------|------|-----------|-----------------|----------------|------------------|----------------|------------------|----|
| 1  | 132.0478  | 66.5275         |                |                  |                |                  | M    |           |                 |                |                  |                |                  | 37 |
| 2  | 231.1162  | 116.0617        |                |                  |                |                  | V    | 3992.0036 | 1996.5054       | 3974.9771      | 1987.9922        | 3973.9930      | 1987.5002        | 36 |
| 3  | 318.1482  | 159.5777        |                |                  | 300.1376       | 150.5725         | S    | 3892.9352 | 1946.9712       | 3875.9086      | 1938.4580        | 3874.9246      | 1937.9660        | 35 |
| 4  | 455.2071  | 228.1072        |                |                  | 437.1966       | 219.1019         | H    | 3805.9032 | 1903.4552       | 3788.8766      | 1894.9419        | 3787.8926      | 1894.4499        | 34 |
| 5  | 592.2660  | 296.6367        |                |                  | 574.2555       | 287.6314         | H    | 3668.8443 | 1834.9258       | 3651.8177      | 1826.4125        | 3650.8337      | 1825.9205        | 33 |
| 6  | 707.2930  | 354.1501        | 690.2664       | 345.6368         | 689.2824       | 345.1448         | N    | 3531.7853 | 1766.3963       | 3514.7588      | 1757.8830        | 3513.7748      | 1757.3910        | 32 |
| 7  | 820.3770  | 410.6922        | 803.3505       | 402.1789         | 802.3665       | 401.6869         | L    | 3416.7584 | 1708.8828       | 3399.7318      | 1700.3696        | 3398.7478      | 1699.8776        | 31 |
| 8  | 921.4247  | 461.2160        | 904.3982       | 452.7027         | 903.4141       | 452.2107         | T    | 3303.6743 | 1652.3408       | 3286.6478      | 1643.8275        | 3285.6638      | 1643.3355        | 30 |
| 9  | 1022.4724 | 511.7398        | 1005.4458      | 503.2266         | 1004.4618      | 502.7346         | T    | 3202.6267 | 1601.8170       | 3185.6001      | 1593.3037        | 3184.6161      | 1592.8117        | 29 |
| 10 | 1079.4939 | 540.2506        | 1062.4673      | 531.7373         | 1061.4833      | 531.2453         | G    | 3101.5790 | 1551.2931       | 3084.5524      | 1542.7799        | 3083.5684      | 1542.2878        | 28 |
| 11 | 1150.5310 | 575.7691        | 1133.5044      | 567.2558         | 1132.5204      | 566.7638         | A    | 3044.5575 | 1522.7824       | 3027.5310      | 1514.2691        | 3026.5469      | 1513.7771        | 27 |
| 12 | 1251.5786 | 626.2930        | 1234.5521      | 617.7797         | 1233.5681      | 617.2877         | T    | 2973.5204 | 1487.2638       | 2956.4938      | 1478.7506        | 2955.5098      | 1478.2586        | 26 |
| 13 | 1364.6627 | 682.8350        | 1347.6362      | 674.3217         | 1346.6521      | 673.8297         | L    | 2872.4727 | 1436.7400       | 2855.4462      | 1428.2267        | 2854.4622      | 1427.7347        | 25 |
| 14 | 1477.7468 | 739.3770        | 1460.7202      | 730.8638         | 1459.7362      | 730.3717         | I    | 2759.3887 | 1380.1980       | 2742.3621      | 1371.6847        | 2741.3781      | 1371.1927        | 24 |
| 15 | 1591.7897 | 796.3985        | 1574.7632      | 787.8852         | 1573.7791      | 787.3932         | N    | 2646.3046 | 1323.6559       | 2629.2780      | 1315.1427        | 2628.2940      | 1314.6506        | 23 |
| 16 | 1720.8323 | 860.9198        | 1703.8057      | 852.4065         | 1702.8217      | 851.9145         | E    | 2532.2617 | 1266.6345       | 2515.2351      | 1258.1212        | 2514.2511      | 1257.6292        | 22 |
| 17 | 1848.8909 | 924.9491        | 1831.8643      | 916.4358         | 1830.8803      | 915.9438         | Q    | 2403.2191 | 1202.1132       | 2386.1925      | 1193.5999        | 2385.2085      | 1193.1079        | 21 |
| 18 | 2034.9702 | 1017.9887       | 2017.9436      | 1009.4755        | 2016.9596      | 1008.9834        | W    | 2275.1605 | 1138.0839       | 2258.1339      | 1129.5706        | 2257.1499      | 1129.0786        | 20 |
| 19 | 2148.0543 | 1074.5308       | 2131.0277      | 1066.0175        | 2130.0437      | 1065.5255        | L    | 2089.0812 | 1045.0442       | 2072.0546      | 1036.5310        | 2071.0706      | 1036.0389        | 19 |
| 20 | 2261.1383 | 1131.0728       | 2244.1118      | 1122.5595        | 2243.1278      | 1122.0675        | L    | 1975.9971 | 988.5022        | 1958.9706      | 979.9889         | 1957.9865      | 979.4969         | 18 |
| 21 | 2362.1860 | 1181.5966       | 2345.1594      | 1173.0834        | 2344.1754      | 1172.5914        | T    | 1862.9130 | 931.9602        | 1845.8865      | 923.4469         | 1844.9025      | 922.9549         | 17 |



|    |           |           |           |           |           |           |   |           |          |           |          |           |          |    |
|----|-----------|-----------|-----------|-----------|-----------|-----------|---|-----------|----------|-----------|----------|-----------|----------|----|
| 22 | 2463.2337 | 1232.1205 | 2446.2071 | 1223.6072 | 2445.2231 | 1223.1152 | T | 1761.8654 | 881.4363 | 1744.8388 | 872.9230 | 1743.8548 | 872.4310 | 16 |
| 23 | 2534.2708 | 1267.6390 | 2517.2442 | 1259.1258 | 2516.2602 | 1258.6337 | A | 1660.8177 | 830.9125 | 1643.7911 | 822.3992 | 1642.8071 | 821.9072 | 15 |
| 24 | 2662.3658 | 1331.6865 | 2645.3392 | 1323.1732 | 2644.3552 | 1322.6812 | K | 1589.7806 | 795.3939 | 1572.7540 | 786.8807 | 1571.7700 | 786.3886 | 14 |
| 25 | 2777.3927 | 1389.2000 | 2760.3661 | 1380.6867 | 2759.3821 | 1380.1947 | N | 1461.6856 | 731.3464 | 1444.6591 | 722.8332 | 1443.6751 | 722.3412 | 13 |
| 26 | 2890.4768 | 1445.7420 | 2873.4502 | 1437.2287 | 2872.4662 | 1436.7367 | L | 1346.6587 | 673.8330 | 1329.6321 | 665.3197 | 1328.6481 | 664.8277 | 12 |
| 27 | 3037.5452 | 1519.2762 | 3020.5186 | 1510.7629 | 3019.5346 | 1510.2709 | F | 1233.5746 | 617.2909 | 1216.5481 | 608.7777 | 1215.5640 | 608.2857 | 11 |
| 28 | 3150.6292 | 1575.8183 | 3133.6027 | 1567.3050 | 3132.6187 | 1566.8130 | L | 1086.5062 | 543.7567 | 1069.4796 | 535.2435 | 1068.4956 | 534.7515 | 10 |
| 29 | 3265.6562 | 1633.3317 | 3248.6296 | 1624.8185 | 3247.6456 | 1624.3264 | N | 973.4221  | 487.2147 | 956.3956  | 478.7014 | 955.4116  | 478.2094 | 9  |
| 30 | 3402.7151 | 1701.8612 | 3385.6885 | 1693.3479 | 3384.7045 | 1692.8559 | H | 858.3952  | 429.7012 | 841.3686  | 421.1880 | 840.3846  | 420.6959 | 8  |
| 31 | 3489.7471 | 1745.3772 | 3472.7206 | 1736.8639 | 3471.7366 | 1736.3719 | S | 721.3363  | 361.1718 | 704.3097  | 352.6585 | 703.3257  | 352.1665 | 7  |
| 32 | 3618.7897 | 1809.8985 | 3601.7632 | 1801.3852 | 3600.7791 | 1800.8932 | E | 634.3042  | 317.6558 | 617.2777  | 309.1425 | 616.2937  | 308.6505 | 6  |
| 33 | 3733.8167 | 1867.4120 | 3716.7901 | 1858.8987 | 3715.8061 | 1858.4067 | N | 505.2617  | 253.1345 | 488.2351  | 244.6212 | 487.2511  | 244.1292 | 5  |
| 34 | 3804.8538 | 1902.9305 | 3787.8272 | 1894.4172 | 3786.8432 | 1893.9252 | A | 390.2347  | 195.6210 | 373.2082  | 187.1077 | 372.2241  | 186.6157 | 4  |
| 35 | 3905.9014 | 1953.4544 | 3888.8749 | 1944.9411 | 3887.8909 | 1944.4491 | T | 319.1976  | 160.1024 | 302.1710  | 151.5892 | 301.1870  | 151.0972 | 3  |
| 36 | 3976.9386 | 1988.9729 | 3959.9120 | 1980.4596 | 3958.9280 | 1979.9676 | A | 218.1499  | 109.5786 | 201.1234  | 101.0653 |           |          | 2  |
| 37 |           |           |           |           |           |           | K | 147.1128  | 74.0600  | 130.0863  | 65.5468  |           |          | 1  |

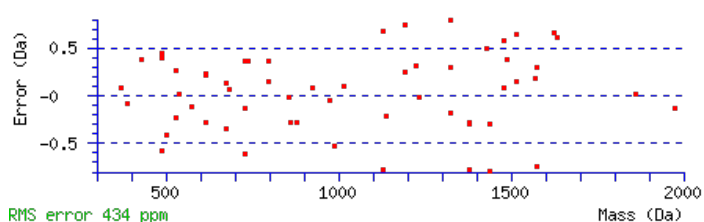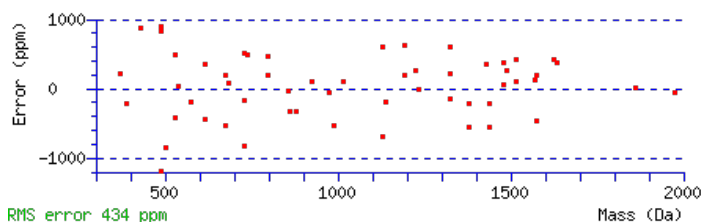

NCBI BLAST search of [MVSHHNLTGATLINEQWLLTTAKNLFNLHSENATAK](#)

(Parameters: blastp, nr protein database, expect=20000, no filter, PAM30)

Other BLAST [web gateways](#)

All matches to this query

| Score | Mr(calc)  | Delta  | Sequence                                             | Site Analysis                        |
|-------|-----------|--------|------------------------------------------------------|--------------------------------------|
| 65.3  | 4122.0367 | 0.0151 | <a href="#">MVSHHNLTGATLINEQWLLTTAKNLFNLHSENATAK</a> | Deamidated N6, N25, N29, N33 24.82%  |
| 62.7  | 4122.0367 | 0.0151 | <a href="#">MVSHHNLTGATLINEQWLLTTAKNLFNLHSENATAK</a> | Deamidated N6, Q17, N29, N33 13.64%  |
| 62.2  | 4121.0527 | 0.9991 | <a href="#">MVSHHNLTGATLINEQWLLTTAKNLFNLHSENATAK</a> |                                      |
| 62.0  | 4122.0367 | 0.0151 | <a href="#">MVSHHNLTGATLINEQWLLTTAKNLFNLHSENATAK</a> | Deamidated Q17, N25, N29, N33 11.58% |
| 62.0  | 4122.0367 | 0.0151 | <a href="#">MVSHHNLTGATLINEQWLLTTAKNLFNLHSENATAK</a> | Deamidated N15, N25, N29, N33 11.58% |
| 60.1  | 4122.0367 | 0.0151 | <a href="#">MVSHHNLTGATLINEQWLLTTAKNLFNLHSENATAK</a> | Deamidated N15, Q17, N29, N33 7.51%  |
| 59.3  | 4122.0367 | 0.0151 | <a href="#">MVSHHNLTGATLINEQWLLTTAKNLFNLHSENATAK</a> | Deamidated N6, Q17, N25, N33 6.24%   |
| 58.4  | 4122.0367 | 0.0151 | <a href="#">MVSHHNLTGATLINEQWLLTTAKNLFNLHSENATAK</a> | Deamidated N6, N15, N29, N33 5.06%   |
| 56.6  | 4122.0367 | 0.0151 | <a href="#">MVSHHNLTGATLINEQWLLTTAKNLFNLHSENATAK</a> | Deamidated N15, Q17, N25, N33 3.39%  |
| 55.8  | 4122.0367 | 0.0151 | <a href="#">MVSHHNLTGATLINEQWLLTTAKNLFNLHSENATAK</a> | Deamidated N6, Q17, N25, N29 2.80%   |

Mascot: <http://www.matrixscience.com/>

# MASCOT SCIENCE Mascot Search Results

## Peptide View

MS/MS Fragmentation of **MVSHHNLTTGATLINEQWLLTTAKNLFNLHSENA**TAK

Found in **J3QR68** in **con\_Xuniprot\_HUMAN3**, J3QR68\_HUMAN Haptoglobin (Fragment) OS=Homo sapiens GN=HP PE=3 SV=1

Match to Query 28922: 4137.102256 from(1035.282840,4+) intensity(0.0000) rtinseconds(2467) scans(6499) index(9782)

Title: 111019\_Est\_ISCardio\_NMI\_YS\_G\_5Spectrum5623\_scans\_6499

Data file C:\mascot\20140703\_Tmgf\_1D\CSV\_UseAnalysis\MasterCSV\All\_Glyco\mgf\ptm\UC18ERLIC\_PTM\_35D.mgf

Click mouse within plot area to zoom in by factor of two about that point

Or, to Da

Label all possible matches Label matches used for scoring

Show Y-axis

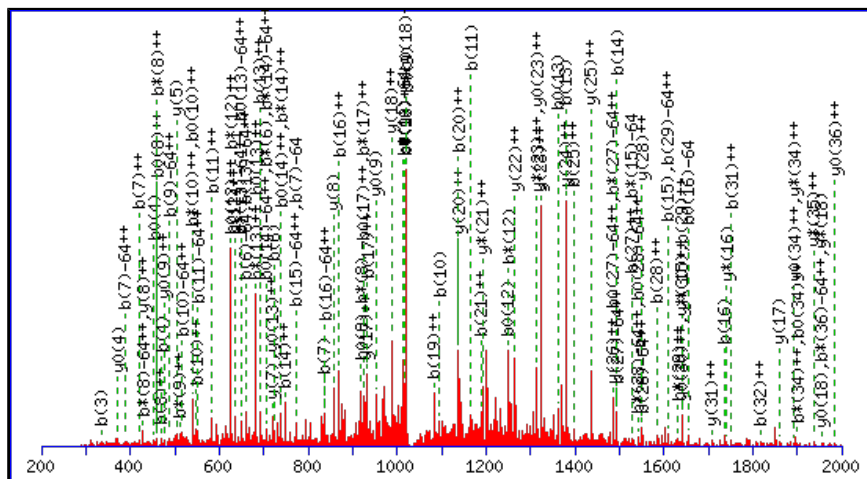

Monoisotopic mass of neutral peptide Mr(calc): 4135.0796

Fixed modifications: Carbamidomethyl (C) (apply to specified residues or termini only)

Variable modifications:

M1 : Oxidation (M), with neutral losses 0.0000 (shown in table), 63.9983

N6 : Deamidated (NQ)

Ions Score: 64 Expect: 5.7e-005

Matches : 113/616 fragment ions using 154 most intense peaks ([help](#))

| #  | b         | b <sup>++</sup> | b <sup>*</sup> | b <sup>*++</sup> | b <sup>0</sup> | b <sup>0++</sup> | Seq. | y         | y <sup>++</sup> | y <sup>*</sup> | y <sup>*++</sup> | y <sup>0</sup> | y <sup>0++</sup> | #  |
|----|-----------|-----------------|----------------|------------------|----------------|------------------|------|-----------|-----------------|----------------|------------------|----------------|------------------|----|
| 1  | 148.0427  | 74.5250         |                |                  |                |                  | M    |           |                 |                |                  |                |                  | 37 |
| 2  | 247.1111  | 124.0592        |                |                  |                |                  | V    | 3989.0516 | 1995.0294       | 3972.0250      | 1986.5161        | 3971.0410      | 1986.0241        | 36 |
| 3  | 334.1431  | 167.5752        |                |                  | 316.1326       | 158.5699         | S    | 3889.9831 | 1945.4952       | 3872.9566      | 1936.9819        | 3871.9726      | 1936.4899        | 35 |
| 4  | 471.2020  | 236.1047        |                |                  | 453.1915       | 227.0994         | H    | 3802.9511 | 1901.9792       | 3785.9246      | 1893.4659        | 3784.9405      | 1892.9739        | 34 |
| 5  | 608.2609  | 304.6341        |                |                  | 590.2504       | 295.6288         | H    | 3665.8922 | 1833.4497       | 3648.8657      | 1824.9365        | 3647.8816      | 1824.4445        | 33 |
| 6  | 723.2879  | 362.1476        | 706.2613       | 353.6343         | 705.2773       | 353.1423         | N    | 3528.8333 | 1764.9203       | 3511.8067      | 1756.4070        | 3510.8227      | 1755.9150        | 32 |
| 7  | 836.3719  | 418.6896        | 819.3454       | 410.1763         | 818.3614       | 409.6843         | L    | 3413.8063 | 1707.4068       | 3396.7798      | 1698.8935        | 3395.7958      | 1698.4015        | 31 |
| 8  | 937.4196  | 469.2135        | 920.3931       | 460.7002         | 919.4091       | 460.2082         | T    | 3300.7223 | 1650.8648       | 3283.6957      | 1642.3515        | 3282.7117      | 1641.8595        | 30 |
| 9  | 1038.4673 | 519.7373        | 1021.4408      | 511.2240         | 1020.4567      | 510.7320         | T    | 3199.6746 | 1600.3409       | 3182.6481      | 1591.8277        | 3181.6640      | 1591.3357        | 29 |
| 10 | 1095.4888 | 548.2480        | 1078.4622      | 539.7347         | 1077.4782      | 539.2427         | G    | 3098.6269 | 1549.8171       | 3081.6004      | 1541.3038        | 3080.6164      | 1540.8118        | 28 |
| 11 | 1166.5259 | 583.7666        | 1149.4993      | 575.2533         | 1148.5153      | 574.7613         | A    | 3041.6055 | 1521.3064       | 3024.5789      | 1512.7931        | 3023.5949      | 1512.3011        | 27 |
| 12 | 1267.5736 | 634.2904        | 1250.5470      | 625.7771         | 1249.5630      | 625.2851         | T    | 2970.5683 | 1485.7878       | 2953.5418      | 1477.2745        | 2952.5578      | 1476.7825        | 26 |
| 13 | 1380.6576 | 690.8325        | 1363.6311      | 682.3192         | 1362.6471      | 681.8272         | L    | 2869.5207 | 1435.2640       | 2852.4941      | 1426.7507        | 2851.5101      | 1426.2587        | 25 |
| 14 | 1493.7417 | 747.3745        | 1476.7151      | 738.8612         | 1475.7311      | 738.3692         | I    | 2756.4366 | 1378.7219       | 2739.4101      | 1370.2087        | 2738.4260      | 1369.7167        | 24 |
| 15 | 1607.7846 | 804.3959        | 1590.7581      | 795.8827         | 1589.7741      | 795.3907         | N    | 2643.3525 | 1322.1799       | 2626.3260      | 1313.6666        | 2625.3420      | 1313.1746        | 23 |
| 16 | 1736.8272 | 868.9172        | 1719.8007      | 860.4040         | 1718.8166      | 859.9120         | E    | 2529.3096 | 1265.1584       | 2512.2831      | 1256.6452        | 2511.2990      | 1256.1532        | 22 |
| 17 | 1864.8858 | 932.9465        | 1847.8592      | 924.4333         | 1846.8752      | 923.9413         | Q    | 2400.2670 | 1200.6371       | 2383.2405      | 1192.1239        | 2382.2565      | 1191.6319        | 21 |
| 18 | 2050.9651 | 1025.9862       | 2033.9386      | 1017.4729        | 2032.9545      | 1016.9809        | W    | 2272.2084 | 1136.6079       | 2255.1819      | 1128.0946        | 2254.1979      | 1127.6026        | 20 |
| 19 | 2164.0492 | 1082.5282       | 2147.0226      | 1074.0149        | 2146.0386      | 1073.5229        | L    | 2086.1291 | 1043.5682       | 2069.1026      | 1035.0549        | 2068.1186      | 1034.5629        | 19 |
| 20 | 2277.1332 | 1139.0703       | 2260.1067      | 1130.5570        | 2259.1227      | 1130.0650        | L    | 1973.0451 | 987.0262        | 1956.0185      | 978.5129         | 1955.0345      | 978.0209         | 18 |
| 21 | 2378.1809 | 1189.5941       | 2361.1544      | 1181.0808        | 2360.1703      | 1180.5888        | T    | 1859.9610 | 930.4841        | 1842.9345      | 921.9709         | 1841.9504      | 921.4789         | 17 |
| 22 | 2479.2286 | 1240.1179       | 2462.2020      | 1231.6047        | 2461.2180      | 1231.1126        | T    | 1758.9133 | 879.9603        | 1741.8868      | 871.4470         | 1740.9028      | 870.9550         | 16 |

|    |           |           |           |           |           |           |   |           |          |           |          |           |          |    |
|----|-----------|-----------|-----------|-----------|-----------|-----------|---|-----------|----------|-----------|----------|-----------|----------|----|
| 23 | 2550.2657 | 1275.6365 | 2533.2392 | 1267.1232 | 2532.2551 | 1266.6312 | A | 1657.8656 | 829.4365 | 1640.8391 | 820.9232 | 1639.8551 | 820.4312 | 15 |
| 24 | 2678.3607 | 1339.6840 | 2661.3341 | 1331.1707 | 2660.3501 | 1330.6787 | K | 1586.8285 | 793.9179 | 1569.8020 | 785.4046 | 1568.8180 | 784.9126 | 14 |
| 25 | 2792.4036 | 1396.7054 | 2775.3770 | 1388.1922 | 2774.3930 | 1387.7002 | N | 1458.7336 | 729.8704 | 1441.7070 | 721.3571 | 1440.7230 | 720.8651 | 13 |
| 26 | 2905.4877 | 1453.2475 | 2888.4611 | 1444.7342 | 2887.4771 | 1444.2422 | L | 1344.6906 | 672.8490 | 1327.6641 | 664.3357 | 1326.6801 | 663.8437 | 12 |
| 27 | 3052.5561 | 1526.7817 | 3035.5295 | 1518.2684 | 3034.5455 | 1517.7764 | F | 1231.6066 | 616.3069 | 1214.5800 | 607.7937 | 1213.5960 | 607.3016 | 11 |
| 28 | 3165.6401 | 1583.3237 | 3148.6136 | 1574.8104 | 3147.6296 | 1574.3184 | L | 1084.5382 | 542.7727 | 1067.5116 | 534.2594 | 1066.5276 | 533.7674 | 10 |
| 29 | 3279.6831 | 1640.3452 | 3262.6565 | 1631.8319 | 3261.6725 | 1631.3399 | N | 971.4541  | 486.2307 | 954.4275  | 477.7174 | 953.4435  | 477.2254 | 9  |
| 30 | 3416.7420 | 1708.8746 | 3399.7154 | 1700.3614 | 3398.7314 | 1699.8693 | H | 857.4112  | 429.2092 | 840.3846  | 420.6959 | 839.4006  | 420.2039 | 8  |
| 31 | 3503.7740 | 1752.3906 | 3486.7475 | 1743.8774 | 3485.7634 | 1743.3854 | S | 720.3523  | 360.6798 | 703.3257  | 352.1665 | 702.3417  | 351.6745 | 7  |
| 32 | 3632.8166 | 1816.9119 | 3615.7900 | 1808.3987 | 3614.8060 | 1807.9067 | E | 633.3202  | 317.1638 | 616.2937  | 308.6505 | 615.3097  | 308.1585 | 6  |
| 33 | 3746.8595 | 1873.9334 | 3729.8330 | 1865.4201 | 3728.8490 | 1864.9281 | N | 504.2776  | 252.6425 | 487.2511  | 244.1292 | 486.2671  | 243.6372 | 5  |
| 34 | 3817.8966 | 1909.4520 | 3800.8701 | 1900.9387 | 3799.8861 | 1900.4467 | A | 390.2347  | 195.6210 | 373.2082  | 187.1077 | 372.2241  | 186.6157 | 4  |
| 35 | 3918.9443 | 1959.9758 | 3901.9178 | 1951.4625 | 3900.9337 | 1950.9705 | T | 319.1976  | 160.1024 | 302.1710  | 151.5892 | 301.1870  | 151.0972 | 3  |
| 36 | 3989.9814 | 1995.4944 | 3972.9549 | 1986.9811 | 3971.9709 | 1986.4891 | A | 218.1499  | 109.5786 | 201.1234  | 101.0653 |           |          | 2  |
| 37 |           |           |           |           |           |           | K | 147.1128  | 74.0600  | 130.0863  | 65.5468  |           |          | 1  |

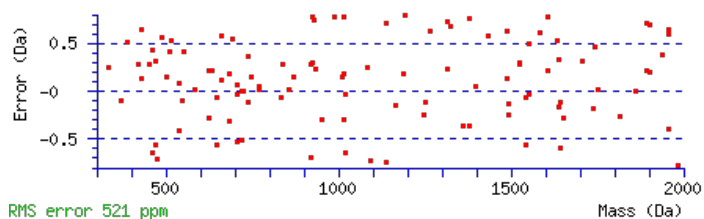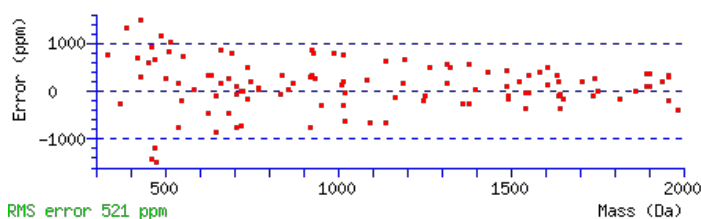

NCBI BLAST search of [MVSHHNLTTGATLINEQWLLTTAKNLFNLHSENATAK](#)

(Parameters: blastp, nr protein database, expect=20000, no filter, PAM30)

Other BLAST [web gateways](#)

All matches to this query

| Score | Mr(calc)  | Delta  | Sequence                                                  | Site Analysis        |
|-------|-----------|--------|-----------------------------------------------------------|----------------------|
| 64.4  | 4135.0796 | 2.0226 | <a href="#">MVSHHNLTTGATLINEQWLLTTAKNLFNLHSENATAK</a>     | Deamidated N6 98.21% |
| 45.7  | 4135.0796 | 2.0226 | <a href="#">MVSHHNLTTGATLINEQWLLTTAKNLFNLHSENATAK</a>     | Deamidated N15 1.31% |
| 40.8  | 4135.0796 | 2.0226 | <a href="#">MVSHHNLTTGATLINEQWLLTTAKNLFNLHSENATAK</a>     | Deamidated N29 0.43% |
| 29.1  | 4135.0796 | 2.0226 | <a href="#">MVSHHNLTTGATLINEQWLLTTAKNLFNLHSENATAK</a>     | Deamidated N25 0.03% |
| 25.2  | 4135.0796 | 2.0226 | <a href="#">MVSHHNLTTGATLINEQWLLTTAKNLFNLHSENATAK</a>     | Deamidated Q17 0.01% |
| 24.0  | 4135.0796 | 2.0226 | <a href="#">MVSHHNLTTGATLINEQWLLTTAKNLFNLHSENATAK</a>     | Deamidated N33 0.01% |
| 11.9  | 4136.0987 | 1.0036 | <a href="#">REESLNQWLHSIAASVIPLAAEQPTIGSGTLLDMTQK</a>     |                      |
| 9.3   | 4135.0855 | 2.0167 | <a href="#">AVEGCVSASQAATEDGQLLRGVGAAATAVTOALNELLOHVK</a> |                      |
| 9.3   | 4135.0855 | 2.0167 | <a href="#">AVEGCVSASQAATEDGQLLRGVGAAATAVTOALNELLOHVK</a> |                      |
| 9.2   | 4135.1147 | 1.9876 | <a href="#">REESLNQWLHSIAASVIPLAAEQPTIGSGTLLDMTQK</a>     |                      |

Mascot: <http://www.matrixscience.com/>

# MASCOT SCIENCE Mascot Search Results

## Peptide View

MS/MS Fragmentation of **NLFLNHSENAKDIAPTLTLYVGK**

Found in **H3BS21** in **con\_Xuniprot\_HUMAN3**, H3BS21\_HUMAN Haptoglobin (Fragment) OS=Homo sapiens GN=HP PE=2 SV=1

Match to Query 25456: 2731.420722 from(911.480850,3+) intensity(36380.2070) rtinseconds(1996) scans(5083) index(11107)

Title: 111019\_Est\_ISCardio\_NMI\_YS\_G\_7Spectrum4320\_scans\_\_5083

Data file C:\mascot\20140703\_Tmgf\_1D\CSV\_UseAnalysis\MasterCSV\All\_Glyco\mgf\ptm\UC18ERLIC\_PTM\_35D.mgf

Click mouse within plot area to zoom in by factor of two about that point

Or,  to  Da

Label all possible matches  Label matches used for scoring

Show Y-axis

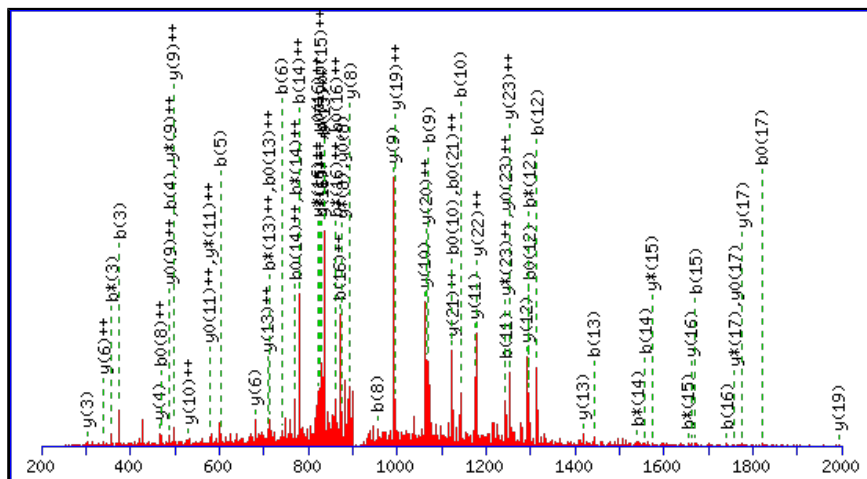

Monoisotopic mass of neutral peptide Mr(calc): 2731.4068

Fixed modifications: Carbamidomethyl (C) (apply to specified residues or termini only)

Variable modifications:

N5 : Deamidated (NQ)

N9 : Deamidated (NQ)

Ions Score: 62 Expect: 0.00013

Matches : 70/266 fragment ions using 140 most intense peaks ([help](#))

| #  | b                | b <sup>++</sup> | b*               | b <sup>*++</sup> | b <sup>0</sup>   | b <sup>0++</sup> | Seq. | y                | y <sup>++</sup>  | y*               | y <sup>*++</sup> | y <sup>0</sup>   | y <sup>0++</sup> | #  |
|----|------------------|-----------------|------------------|------------------|------------------|------------------|------|------------------|------------------|------------------|------------------|------------------|------------------|----|
| 1  | 115.0502         | 58.0287         | 98.0237          | 49.5155          |                  |                  | N    |                  |                  |                  |                  |                  |                  | 25 |
| 2  | 228.1343         | 114.5708        | 211.1077         | 106.0575         |                  |                  | L    | 2618.3712        | 1309.6892        | 2601.3447        | 1301.1760        | 2600.3606        | 1300.6840        | 24 |
| 3  | <b>375.2027</b>  | 188.1050        | <b>358.1761</b>  | 179.5917         |                  |                  | F    | 2505.2871        | <b>1253.1472</b> | 2488.2606        | <b>1244.6339</b> | 2487.2766        | <b>1244.1419</b> | 23 |
| 4  | <b>488.2867</b>  | 244.6470        | 471.2602         | 236.1337         |                  |                  | L    | 2358.2187        | <b>1179.6130</b> | 2341.1922        | 1171.0997        | 2340.2082        | 1170.6077        | 22 |
| 5  | <b>603.3137</b>  | 302.1605        | 586.2871         | 293.6472         |                  |                  | N    | 2245.1347        | <b>1123.0710</b> | 2228.1081        | 1114.5577        | 2227.1241        | 1114.0657        | 21 |
| 6  | <b>740.3726</b>  | 370.6899        | 723.3461         | 362.1767         |                  |                  | H    | 2130.1077        | <b>1065.5575</b> | 2113.0812        | 1057.0442        | 2112.0972        | 1056.5522        | 20 |
| 7  | <b>827.4046</b>  | 414.2060        | 810.3781         | 405.6927         | 809.3941         | 405.2007         | S    | <b>1993.0488</b> | <b>997.0280</b>  | 1976.0223        | 988.5148         | 1975.0383        | 988.0228         | 19 |
| 8  | <b>956.4472</b>  | 478.7272        | 939.4207         | 470.2140         | 938.4367         | <b>469.7220</b>  | E    | 1906.0168        | 953.5120         | 1888.9902        | 944.9988         | 1888.0062        | 944.5067         | 18 |
| 9  | <b>1071.4742</b> | 536.2407        | 1054.4476        | 527.7274         | 1053.4636        | 527.2354         | N    | <b>1776.9742</b> | 888.9907         | <b>1759.9476</b> | 880.4775         | <b>1758.9636</b> | 879.9855         | 17 |
| 10 | <b>1142.5113</b> | 571.7593        | 1125.4847        | 563.2460         | <b>1124.5007</b> | 562.7540         | A    | <b>1661.9473</b> | <b>831.4773</b>  | 1644.9207        | <b>822.9640</b>  | 1643.9367        | <b>822.4720</b>  | 16 |
| 11 | <b>1243.5590</b> | 622.2831        | 1226.5324        | 613.7698         | 1225.5484        | 613.2778         | T    | 1590.9101        | 795.9587         | <b>1573.8836</b> | 787.4454         | 1572.8996        | 786.9534         | 15 |
| 12 | <b>1314.5961</b> | 657.8017        | <b>1297.5695</b> | 649.2884         | <b>1296.5855</b> | 648.7964         | A    | 1489.8625        | 745.4349         | 1472.8359        | 736.9216         | 1471.8519        | 736.4296         | 14 |
| 13 | <b>1442.6910</b> | 721.8492        | 1425.6645        | <b>713.3359</b>  | 1424.6805        | <b>712.8439</b>  | K    | <b>1418.8253</b> | <b>709.9163</b>  | 1401.7988        | 701.4030         | 1400.8148        | 700.9110         | 13 |
| 14 | <b>1557.7180</b> | <b>779.3626</b> | <b>1540.6914</b> | <b>770.8494</b>  | 1539.7074        | <b>770.3573</b>  | D    | <b>1290.7304</b> | 645.8688         | 1273.7038        | 637.3556         | 1272.7198        | 636.8635         | 12 |
| 15 | <b>1670.8020</b> | <b>835.9047</b> | <b>1653.7755</b> | <b>827.3914</b>  | 1652.7915        | <b>826.8994</b>  | I    | <b>1175.7034</b> | 588.3554         | 1158.6769        | <b>579.8421</b>  | 1157.6929        | <b>579.3501</b>  | 11 |
| 16 | <b>1741.8392</b> | <b>871.4232</b> | 1724.8126        | <b>862.9099</b>  | 1723.8286        | <b>862.4179</b>  | A    | <b>1062.6194</b> | <b>531.8133</b>  | 1045.5928        | 523.3001         | 1044.6088        | 522.8080         | 10 |
| 17 | 1838.8919        | 919.9496        | 1821.8654        | 911.4363         | <b>1820.8814</b> | 910.9443         | P    | <b>991.5823</b>  | <b>496.2948</b>  | 974.5557         | <b>487.7815</b>  | 973.5717         | <b>487.2895</b>  | 9  |
| 18 | 1939.9396        | 970.4734        | 1922.9130        | 961.9602         | 1921.9290        | 961.4682         | T    | <b>894.5295</b>  | 447.7684         | <b>877.5029</b>  | 439.2551         | <b>876.5189</b>  | 438.7631         | 8  |
| 19 | 2053.0237        | 1027.0155       | 2035.9971        | 1018.5022        | 2035.0131        | 1018.0102        | L    | 793.4818         | 397.2445         | 776.4553         | 388.7313         | 775.4713         | 388.2393         | 7  |
| 20 | 2154.0713        | 1077.5393       | 2137.0448        | 1069.0260        | 2136.0608        | 1068.5340        | T    | <b>680.3978</b>  | <b>340.7025</b>  | 663.3712         | 332.1892         | 662.3872         | 331.6972         | 6  |
| 21 | 2267.1554        | 1134.0813       | 2250.1289        | 1125.5681        | 2249.1448        | <b>1125.0761</b> | L    | <b>579.3501</b>  | 290.1787         | 562.3235         | 281.6654         |                  |                  | 5  |
| 22 | 2430.2187        | 1215.6130       | 2413.1922        | 1207.0997        | 2412.2082        | 1206.6077        | Y    | <b>466.2660</b>  | 233.6366         | 449.2395         | 225.1234         |                  |                  | 4  |

|    |           |           |           |           |           |           |   |          |          |          |          |  |  |   |
|----|-----------|-----------|-----------|-----------|-----------|-----------|---|----------|----------|----------|----------|--|--|---|
| 23 | 2529.2871 | 1265.1472 | 2512.2606 | 1256.6339 | 2511.2766 | 1256.1419 | V | 303.2027 | 152.1050 | 286.1761 | 143.5917 |  |  | 3 |
| 24 | 2586.3086 | 1293.6579 | 2569.2821 | 1285.1447 | 2568.2980 | 1284.6527 | G | 204.1343 | 102.5708 | 187.1077 | 94.0575  |  |  | 2 |
| 25 |           |           |           |           |           |           | K | 147.1128 | 74.0600  | 130.0863 | 65.5468  |  |  | 1 |

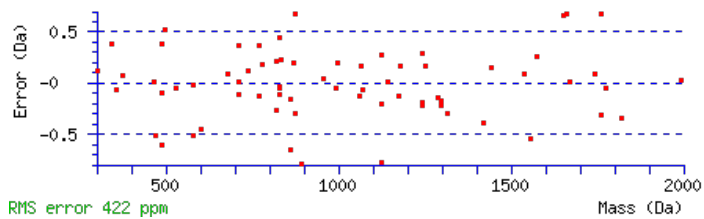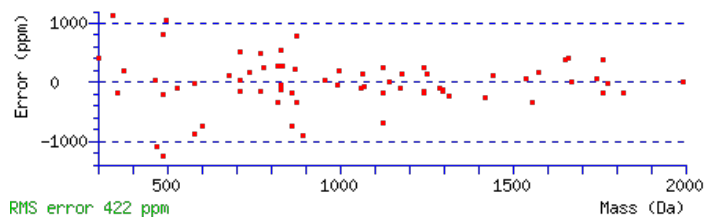

NCBI BLAST search of [NLFLNHSENATAKDIAPTLTLYVGK](#)  
 (Parameters: blastp, nr protein database, expect=20000, no filter, PAM30)  
 Other BLAST [web gateways](#)

All matches to this query

| Score | Mr(calc)  | Delta   | Sequence                                  | Site Analysis            |
|-------|-----------|---------|-------------------------------------------|--------------------------|
| 62.0  | 2731.4068 | 0.0139  | <a href="#">NLFLNHSENATAKDIAPTLTLYVGK</a> | Deamidated N5, N9 72.98% |
| 56.6  | 2730.4228 | 0.9979  | <a href="#">NLFLNHSENATAKDIAPTLTLYVGK</a> |                          |
| 56.6  | 2730.4228 | 0.9979  | <a href="#">NLFLNHSENATAKDIAPTLTLYVGK</a> |                          |
| 56.6  | 2731.4068 | 0.0139  | <a href="#">NLFLNHSENATAKDIAPTLTLYVGK</a> | Deamidated N1, N9 20.81% |
| 51.3  | 2731.4068 | 0.0139  | <a href="#">NLFLNHSENATAKDIAPTLTLYVGK</a> | Deamidated N1, N5 6.21%  |
| 36.4  | 2730.4228 | 0.9979  | <a href="#">NLFLNHSENATAKDIAPTLTLYVGK</a> |                          |
| 9.8   | 2729.4244 | 1.9963  | <a href="#">ELAGIWAQSQDCIAAALACSKILK</a>  |                          |
| 5.6   | 2730.4084 | 1.0123  | <a href="#">ELAGIWAQSQDCIAAALACSKILK</a>  |                          |
| 5.6   | 2730.4084 | 1.0123  | <a href="#">ELAGIWAQSQDCIAAALACSKILK</a>  |                          |
| 2.8   | 2731.4279 | -0.0072 | <a href="#">DGSLTELQKRLNSIYGELIPELNK</a>  |                          |

Mascot: <http://www.matrixscience.com/>



# MASCOT SCIENCE Mascot Search Results

## Peptide View

MS/MS Fragmentation of **MVSHHNLTTGATLINEQWLLTTAKNLFNLHSEENATAK**

Found in **J3QR68** in **con\_Xuniprot\_HUMAN3**, J3QR68\_HUMAN Haptoglobin (Fragment) OS=Homo sapiens GN=HP PE=3 SV=1

Match to Query 28578: 4121.094936 from(1031.281010,4+) intensity(0.0000) rtinseconds(2507) scans(6844) index(17910)

Title: 111019\_Est\_MI\_YP\_G\_07Spectrum5928\_scans\_6844

Data file C:\mascot\20140703\_Tmgf\_1D\CSV\_UseAnalysis\MasterCSV\All\_Glyco\mgf\ptm\UC18ERLIC\_PTM\_35D.mgf

Click mouse within plot area to zoom in by factor of two about that point

Or, to Da

Label all possible matches Label matches used for scoring

Show Y-axis

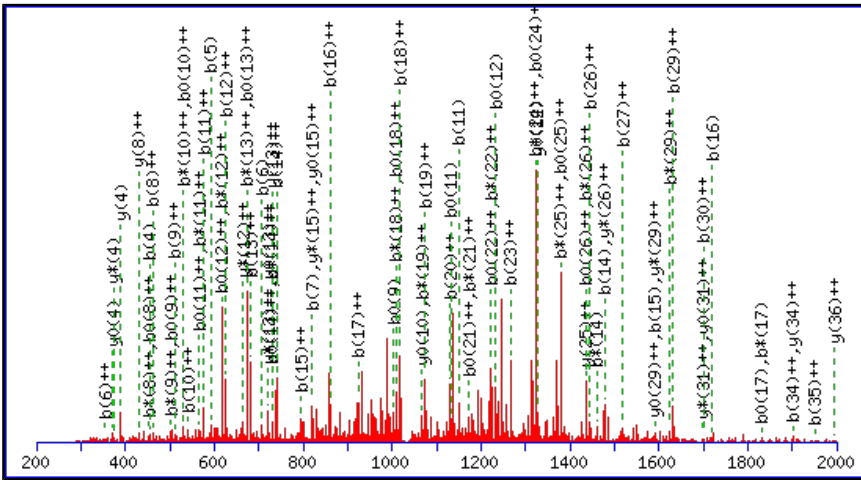

Monoisotopic mass of neutral peptide Mr(calc): 4119.0847

Fixed modifications: Carbamidomethyl (C) (apply to specified residues or termini only)

Variable modifications:

N6 : Deamidated (NQ)

Ions Score: 61 Expect: 0.00012

Matches : 83/414 fragment ions using 174 most intense peaks ([help](#))

| #  | b         | b <sup>++</sup> | b <sup>*</sup> | b <sup>*++</sup> | b <sup>0</sup> | b <sup>0++</sup> | Seq. | y         | y <sup>++</sup> | y <sup>*</sup> | y <sup>*++</sup> | y <sup>0</sup> | y <sup>0++</sup> | #  |
|----|-----------|-----------------|----------------|------------------|----------------|------------------|------|-----------|-----------------|----------------|------------------|----------------|------------------|----|
| 1  | 132.0478  | 66.5275         |                |                  |                |                  | M    |           |                 |                |                  |                |                  | 37 |
| 2  | 231.1162  | 116.0617        |                |                  |                |                  | V    | 3989.0516 | 1995.0294       | 3972.0250      | 1986.5161        | 3971.0410      | 1986.0241        | 36 |
| 3  | 318.1482  | 159.5777        |                |                  | 300.1376       | 150.5725         | S    | 3889.9831 | 1945.4952       | 3872.9566      | 1936.9819        | 3871.9726      | 1936.4899        | 35 |
| 4  | 455.2071  | 228.1072        |                |                  | 437.1966       | 219.1019         | H    | 3802.9511 | 1901.9792       | 3785.9246      | 1893.4659        | 3784.9405      | 1892.9739        | 34 |
| 5  | 592.2660  | 296.6367        |                |                  | 574.2555       | 287.6314         | H    | 3665.8922 | 1833.4497       | 3648.8657      | 1824.9365        | 3647.8816      | 1824.4445        | 33 |
| 6  | 707.2930  | 354.1501        | 690.2664       | 345.6368         | 689.2824       | 345.1448         | N    | 3528.8333 | 1764.9203       | 3511.8067      | 1756.4070        | 3510.8227      | 1755.9150        | 32 |
| 7  | 820.3770  | 410.6922        | 803.3505       | 402.1789         | 802.3665       | 401.6869         | L    | 3413.8063 | 1707.4068       | 3396.7798      | 1698.8935        | 3395.7958      | 1698.4015        | 31 |
| 8  | 921.4247  | 461.2160        | 904.3982       | 452.7027         | 903.4141       | 452.2107         | T    | 3300.7223 | 1650.8648       | 3283.6957      | 1642.3515        | 3282.7117      | 1641.8595        | 30 |
| 9  | 1022.4724 | 511.7398        | 1005.4458      | 503.2266         | 1004.4618      | 502.7346         | T    | 3199.6746 | 1600.3409       | 3182.6481      | 1591.8277        | 3181.6640      | 1591.3357        | 29 |
| 10 | 1079.4939 | 540.2506        | 1062.4673      | 531.7373         | 1061.4833      | 531.2453         | G    | 3098.6269 | 1549.8171       | 3081.6004      | 1541.3038        | 3080.6164      | 1540.8118        | 28 |
| 11 | 1150.5310 | 575.7691        | 1133.5044      | 567.2558         | 1132.5204      | 566.7638         | A    | 3041.6055 | 1521.3064       | 3024.5789      | 1512.7931        | 3023.5949      | 1512.3011        | 27 |
| 12 | 1251.5786 | 626.2930        | 1234.5521      | 617.7797         | 1233.5681      | 617.2877         | T    | 2970.5683 | 1485.7878       | 2953.5418      | 1477.2745        | 2952.5578      | 1476.7825        | 26 |
| 13 | 1364.6627 | 682.8350        | 1347.6362      | 674.3217         | 1346.6521      | 673.8297         | L    | 2869.5207 | 1435.2640       | 2852.4941      | 1426.7507        | 2851.5101      | 1426.2587        | 25 |
| 14 | 1477.7468 | 739.3770        | 1460.7202      | 730.8638         | 1459.7362      | 730.3717         | I    | 2756.4366 | 1378.7219       | 2739.4101      | 1370.2087        | 2738.4260      | 1369.7167        | 24 |
| 15 | 1591.7897 | 796.3985        | 1574.7632      | 787.8852         | 1573.7791      | 787.3932         | N    | 2643.3525 | 1322.1799       | 2626.3260      | 1313.6666        | 2625.3420      | 1313.1746        | 23 |
| 16 | 1720.8323 | 860.9198        | 1703.8057      | 852.4065         | 1702.8217      | 851.9145         | E    | 2529.3096 | 1265.1584       | 2512.2831      | 1256.6452        | 2511.2990      | 1256.1532        | 22 |
| 17 | 1848.8909 | 924.9491        | 1831.8643      | 916.4358         | 1830.8803      | 915.9438         | Q    | 2400.2670 | 1200.6371       | 2383.2405      | 1192.1239        | 2382.2565      | 1191.6319        | 21 |
| 18 | 2034.9702 | 1017.9887       | 2017.9436      | 1009.4755        | 2016.9596      | 1008.9834        | W    | 2272.2084 | 1136.6079       | 2255.1819      | 1128.0946        | 2254.1979      | 1127.6026        | 20 |
| 19 | 2148.0543 | 1074.5308       | 2131.0277      | 1066.0175        | 2130.0437      | 1065.5255        | L    | 2086.1291 | 1043.5682       | 2069.1026      | 1035.0549        | 2068.1186      | 1034.5629        | 19 |
| 20 | 2261.1383 | 1131.0728       | 2244.1118      | 1122.5595        | 2243.1278      | 1122.0675        | L    | 1973.0451 | 987.0262        | 1956.0185      | 978.5129         | 1955.0345      | 978.0209         | 18 |
| 21 | 2362.1860 | 1181.5966       | 2345.1594      | 1173.0834        | 2344.1754      | 1172.5914        | T    | 1859.9610 | 930.4841        | 1842.9345      | 921.9709         | 1841.9504      | 921.4789         | 17 |
| 22 | 2463.2337 | 1232.1205       | 2446.2071      | 1223.6072        | 2445.2231      | 1223.1152        | T    | 1758.9133 | 879.9603        | 1741.8868      | 871.4470         | 1740.9028      | 870.9550         | 16 |
| 23 | 2534.2708 | 1267.6390       | 2517.2442      | 1259.1258        | 2516.2602      | 1258.6337        | A    | 1657.8656 | 829.4365        | 1640.8391      | 820.9232         | 1639.8551      | 820.4312         | 15 |

|    |           |           |           |           |           |           |   |           |          |           |          |           |          |    |
|----|-----------|-----------|-----------|-----------|-----------|-----------|---|-----------|----------|-----------|----------|-----------|----------|----|
| 24 | 2662.3658 | 1331.6865 | 2645.3392 | 1323.1732 | 2644.3552 | 1322.6812 | K | 1586.8285 | 793.9179 | 1569.8020 | 785.4046 | 1568.8180 | 784.9126 | 14 |
| 25 | 2776.4087 | 1388.7080 | 2759.3821 | 1380.1947 | 2758.3981 | 1379.7027 | N | 1458.7336 | 729.8704 | 1441.7070 | 721.3571 | 1440.7230 | 720.8651 | 13 |
| 26 | 2889.4927 | 1445.2500 | 2872.4662 | 1436.7367 | 2871.4822 | 1436.2447 | L | 1344.6906 | 672.8490 | 1327.6641 | 664.3357 | 1326.6801 | 663.8437 | 12 |
| 27 | 3036.5612 | 1518.7842 | 3019.5346 | 1510.2709 | 3018.5506 | 1509.7789 | F | 1231.6066 | 616.3069 | 1214.5800 | 607.7937 | 1213.5960 | 607.3016 | 11 |
| 28 | 3149.6452 | 1575.3262 | 3132.6187 | 1566.8130 | 3131.6347 | 1566.3210 | L | 1084.5382 | 542.7727 | 1067.5116 | 534.2594 | 1066.5276 | 533.7674 | 10 |
| 29 | 3263.6881 | 1632.3477 | 3246.6616 | 1623.8344 | 3245.6776 | 1623.3424 | N | 971.4541  | 486.2307 | 954.4275  | 477.7174 | 953.4435  | 477.2254 | 9  |
| 30 | 3400.7471 | 1700.8772 | 3383.7205 | 1692.3639 | 3382.7365 | 1691.8719 | H | 857.4112  | 429.2092 | 840.3846  | 420.6959 | 839.4006  | 420.2039 | 8  |
| 31 | 3487.7791 | 1744.3932 | 3470.7525 | 1735.8799 | 3469.7685 | 1735.3879 | S | 720.3523  | 360.6798 | 703.3257  | 352.1665 | 702.3417  | 351.6745 | 7  |
| 32 | 3616.8217 | 1808.9145 | 3599.7951 | 1800.4012 | 3598.8111 | 1799.9092 | E | 633.3202  | 317.1638 | 616.2937  | 308.6505 | 615.3097  | 308.1585 | 6  |
| 33 | 3730.8646 | 1865.9359 | 3713.8381 | 1857.4227 | 3712.8540 | 1856.9307 | N | 504.2776  | 252.6425 | 487.2511  | 244.1292 | 486.2671  | 243.6372 | 5  |
| 34 | 3801.9017 | 1901.4545 | 3784.8752 | 1892.9412 | 3783.8912 | 1892.4492 | A | 390.2347  | 195.6210 | 373.2082  | 187.1077 | 372.2241  | 186.6157 | 4  |
| 35 | 3902.9494 | 1951.9783 | 3885.9229 | 1943.4651 | 3884.9388 | 1942.9731 | T | 319.1976  | 160.1024 | 302.1710  | 151.5892 | 301.1870  | 151.0972 | 3  |
| 36 | 3973.9865 | 1987.4969 | 3956.9600 | 1978.9836 | 3955.9759 | 1978.4916 | A | 218.1499  | 109.5786 | 201.1234  | 101.0653 |           |          | 2  |
| 37 |           |           |           |           |           |           | K | 147.1128  | 74.0600  | 130.0863  | 65.5468  |           |          | 1  |

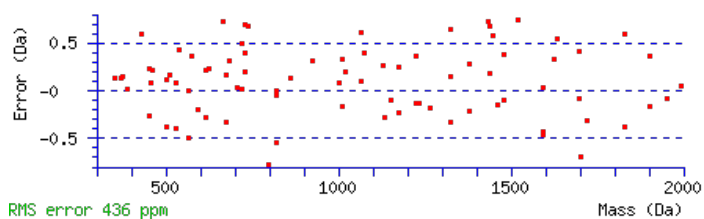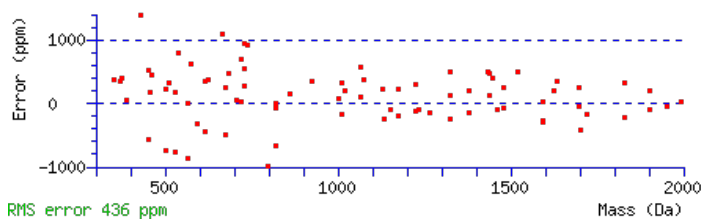

NCBI BLAST search of [MVSHHNLTGATLINEQWLLTTAKNLFNLHSENATAK](#)

(Parameters: blastp, nr protein database, expect=20000, no filter, PAM30)

Other BLAST [web gateways](#)

All matches to this query

| Score | Mr(calc)  | Delta  | Sequence                                                 | Site Analysis        |
|-------|-----------|--------|----------------------------------------------------------|----------------------|
| 61.4  | 4119.0847 | 2.0102 | <a href="#">MVSHHNLTGATLINEQWLLTTAKNLFNLHSENATAK</a>     | Deamidated N6 99.15% |
| 36.4  | 4119.0847 | 2.0102 | <a href="#">MVSHHNLTGATLINEQWLLTTAKNLFNLHSENATAK</a>     | Deamidated N33 0.32% |
| 36.0  | 4119.0847 | 2.0102 | <a href="#">MVSHHNLTGATLINEQWLLTTAKNLFNLHSENATAK</a>     | Deamidated N25 0.29% |
| 34.2  | 4119.0847 | 2.0102 | <a href="#">MVSHHNLTGATLINEQWLLTTAKNLFNLHSENATAK</a>     | Deamidated N29 0.19% |
| 26.8  | 4119.0847 | 2.0102 | <a href="#">MVSHHNLTGATLINEQWLLTTAKNLFNLHSENATAK</a>     | Deamidated Q17 0.03% |
| 23.3  | 4119.0847 | 2.0102 | <a href="#">MVSHHNLTGATLINEQWLLTTAKNLFNLHSENATAK</a>     | Deamidated N15 0.02% |
| 8.0   | 4120.0885 | 1.0064 | <a href="#">AAFQIISQVISEATEQVLATTVGKVVAGRVCQASQLOGQK</a> |                      |
| 8.0   | 4120.0885 | 1.0064 | <a href="#">AAFQIISQVISEATEQVLATTVGKVVAGRVCQASQLOGQK</a> |                      |
| 6.8   | 4120.0885 | 1.0064 | <a href="#">AAFQIISQVISEATEQVLATTVGKVVAGRVCQASQLOGQK</a> |                      |
| 6.1   | 4120.0885 | 1.0064 | <a href="#">AAFQIISQVISEATEQVLATTVGKVVAGRVCQASQLOGQK</a> |                      |

Mascot: <http://www.matrixscience.com/>



# MATRIX SCIENCE Mascot Search Results

## Peptide View

MS/MS Fragmentation of **NLFLNHSENAKDIAPTLTLYVGKK**

Found in **H3BS21** in **con\_Xuniprot\_HUMAN3**, H3BS21\_HUMAN Haptoglobin (Fragment) OS=Homo sapiens GN=HP PE=2 SV=1

Match to Query 25971: 2859.519732 from(954.180520,3+) intensity(1235108.3750) rtinseconds(1753) scans(4448) index(24588)

Title: 111019\_Est\_MI\_YS\_G\_06Spectrum3869\_scans\_\_4448

Data file C:\mascot\20140703\_Tmgf\_1D\CSV\_UseAnalysis\MasterCSV\All\_Glyco\mgf\ptm\UC18ERLIC\_PTM\_35D.mgf

Click mouse within plot area to zoom in by factor of two about that point

Or, to Da

Label all possible matches Label matches used for scoring

Show Y-axis

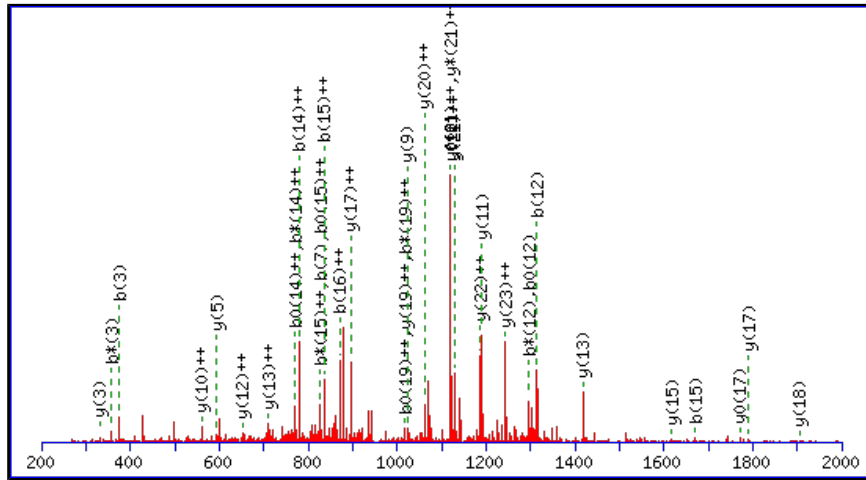

Monoisotopic mass of neutral peptide Mr(calc): 2858.5178

Fixed modifications: Carbamidomethyl (C) (apply to specified residues or termini only)

Variable modifications:

N9 : Deamidated (NQ)

Ions Score: 59 Expect: 0.00013

Matches : 37/276 fragment ions using 53 most intense peaks ([help](#))

| #  | b                | b <sup>++</sup> | b <sup>*</sup>   | b <sup>*++</sup> | b <sup>0</sup>   | b <sup>0++</sup> | Seq. | y                | y <sup>++</sup>  | y <sup>*</sup> | y <sup>*++</sup> | y <sup>0</sup>   | y <sup>0++</sup> | #  |
|----|------------------|-----------------|------------------|------------------|------------------|------------------|------|------------------|------------------|----------------|------------------|------------------|------------------|----|
| 1  | 115.0502         | 58.0287         | 98.0237          | 49.5155          |                  |                  | N    |                  |                  |                |                  |                  |                  | 26 |
| 2  | 228.1343         | 114.5708        | 211.1077         | 106.0575         |                  |                  | L    | 2745.4822        | 1373.2447        | 2728.4556      | 1364.7314        | 2727.4716        | 1364.2394        | 25 |
| 3  | <b>375.2027</b>  | 188.1050        | <b>358.1761</b>  | 179.5917         |                  |                  | F    | 2632.3981        | 1316.7027        | 2615.3715      | 1308.1894        | 2614.3875        | 1307.6974        | 24 |
| 4  | 488.2867         | 244.6470        | 471.2602         | 236.1337         |                  |                  | L    | 2485.3297        | <b>1243.1685</b> | 2468.3031      | 1234.6552        | 2467.3191        | 1234.1632        | 23 |
| 5  | 602.3297         | 301.6685        | 585.3031         | 293.1552         |                  |                  | N    | 2372.2456        | <b>1186.6264</b> | 2355.2191      | 1178.1132        | 2354.2351        | 1177.6212        | 22 |
| 6  | 739.3886         | 370.1979        | 722.3620         | 361.6847         |                  |                  | H    | 2258.2027        | <b>1129.6050</b> | 2241.1761      | <b>1121.0917</b> | 2240.1921        | <b>1120.5997</b> | 21 |
| 7  | <b>826.4206</b>  | 413.7139        | 809.3941         | 405.2007         | 808.4100         | 404.7087         | S    | 2121.1438        | <b>1061.0755</b> | 2104.1172      | 1052.5623        | 2103.1332        | 1052.0702        | 20 |
| 8  | 955.4632         | 478.2352        | 938.4367         | 469.7220         | 937.4526         | 469.2300         | E    | 2034.1118        | <b>1017.5595</b> | 2017.0852      | 1009.0462        | 2016.1012        | 1008.5542        | 19 |
| 9  | 1070.4901        | 535.7487        | 1053.4636        | 527.2354         | 1052.4796        | 526.7434         | N    | <b>1905.0692</b> | 953.0382         | 1888.0426      | 944.5249         | 1887.0586        | 944.0329         | 18 |
| 10 | 1141.5273        | 571.2673        | 1124.5007        | 562.7540         | 1123.5167        | 562.2620         | A    | <b>1790.0422</b> | <b>895.5247</b>  | 1773.0157      | 887.0115         | <b>1772.0316</b> | 886.5195         | 17 |
| 11 | 1242.5749        | 621.7911        | 1225.5484        | 613.2778         | 1224.5644        | 612.7858         | T    | 1719.0051        | 860.0062         | 1701.9786      | 851.4929         | 1700.9945        | 851.0009         | 16 |
| 12 | <b>1313.6121</b> | 657.3097        | <b>1296.5855</b> | 648.7964         | <b>1295.6015</b> | 648.3044         | A    | <b>1617.9574</b> | 809.4823         | 1600.9309      | 800.9691         | 1599.9469        | 800.4771         | 15 |
| 13 | 1441.7070        | 721.3571        | 1424.6805        | 712.8439         | 1423.6965        | 712.3519         | K    | 1546.9203        | 773.9638         | 1529.8938      | 765.4505         | 1528.9097        | 764.9585         | 14 |
| 14 | 1556.7340        | <b>778.8706</b> | 1539.7074        | <b>770.3573</b>  | 1538.7234        | <b>769.8653</b>  | D    | <b>1418.8253</b> | <b>709.9163</b>  | 1401.7988      | 701.4030         | 1400.8148        | 700.9110         | 13 |
| 15 | <b>1669.8180</b> | <b>835.4127</b> | 1652.7915        | <b>826.8994</b>  | 1651.8075        | <b>826.4074</b>  | I    | 1303.7984        | <b>652.4028</b>  | 1286.7719      | 643.8896         | 1285.7878        | 643.3976         | 12 |
| 16 | 1740.8551        | <b>870.9312</b> | 1723.8286        | 862.4179         | 1722.8446        | 861.9259         | A    | <b>1190.7143</b> | 595.8608         | 1173.6878      | 587.3475         | 1172.7038        | 586.8555         | 11 |
| 17 | 1837.9079        | 919.4576        | 1820.8814        | 910.9443         | 1819.8973        | 910.4523         | P    | <b>1119.6772</b> | <b>560.3422</b>  | 1102.6507      | 551.8290         | 1101.6667        | 551.3370         | 10 |
| 18 | 1938.9556        | 969.9814        | 1921.9290        | 961.4682         | 1920.9450        | 960.9761         | T    | <b>1022.6245</b> | 511.8159         | 1005.5979      | 503.3026         | 1004.6139        | 502.8106         | 9  |
| 19 | 2052.0396        | 1026.5235       | 2035.0131        | <b>1018.0102</b> | 2034.0291        | <b>1017.5182</b> | L    | 921.5768         | 461.2920         | 904.5502       | 452.7788         | 903.5662         | 452.2867         | 8  |
| 20 | 2153.0873        | 1077.0473       | 2136.0608        | 1068.5340        | 2135.0768        | 1068.0420        | T    | 808.4927         | 404.7500         | 791.4662       | 396.2367         | 790.4822         | 395.7447         | 7  |
| 21 | 2266.1714        | 1133.5893       | 2249.1448        | 1125.0761        | 2248.1608        | 1124.5840        | L    | 707.4450         | 354.2262         | 690.4185       | 345.7129         |                  |                  | 6  |
| 22 | 2429.2347        | 1215.1210       | 2412.2082        | 1206.6077        | 2411.2242        | 1206.1157        | Y    | <b>594.3610</b>  | 297.6841         | 577.3344       | 289.1709         |                  |                  | 5  |
| 23 | 2528.3031        | 1264.6552       | 2511.2766        | 1256.1419        | 2510.2926        | 1255.6499        | V    | 431.2976         | 216.1525         | 414.2711       | 207.6392         |                  |                  | 4  |

|    |           |           |           |           |           |           |   |          |          |          |          |  |  |   |
|----|-----------|-----------|-----------|-----------|-----------|-----------|---|----------|----------|----------|----------|--|--|---|
| 24 | 2585.3246 | 1293.1659 | 2568.2980 | 1284.6527 | 2567.3140 | 1284.1607 | G | 332.2292 | 166.6183 | 315.2027 | 158.1050 |  |  | 3 |
| 25 | 2713.4196 | 1357.2134 | 2696.3930 | 1348.7001 | 2695.4090 | 1348.2081 | K | 275.2078 | 138.1075 | 258.1812 | 129.5942 |  |  | 2 |
| 26 |           |           |           |           |           |           | K | 147.1128 | 74.0600  | 130.0863 | 65.5468  |  |  | 1 |

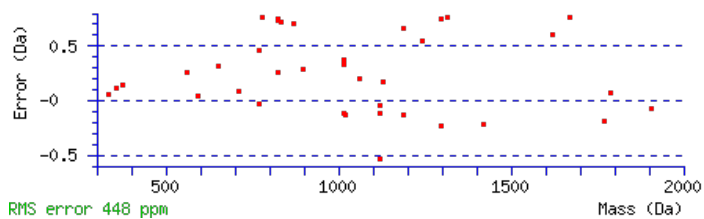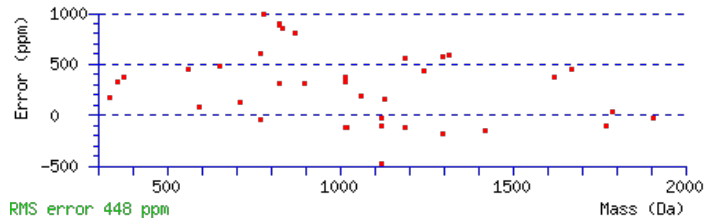

NCBI BLAST search of [NLFLNHSENATAKDIAPTLTLYVGKK](#)  
 (Parameters: blastp, nr protein database, expect=20000, no filter, PAM30)  
 Other BLAST [web gateways](#)

All matches to this query

| Score | Mr(calc)  | Delta   | Sequence                                   | Site Analysis        |
|-------|-----------|---------|--------------------------------------------|----------------------|
| 59.4  | 2858.5178 | 1.0020  | <a href="#">NLFLNHSENATAKDIAPTLTLYVGKK</a> | Deamidated N9 91.96% |
| 48.6  | 2858.5178 | 1.0020  | <a href="#">NLFLNHSENATAKDIAPTLTLYVGKK</a> | Deamidated N5 7.61%  |
| 36.1  | 2858.5178 | 1.0020  | <a href="#">NLFLNHSENATAKDIAPTLTLYVGKK</a> | Deamidated N1 0.43%  |
| 3.8   | 2859.5243 | -0.0045 | <a href="#">EYLVRVHVPPNIAGTDEPRDITVLR</a>  |                      |
| 0.6   | 2859.5090 | 0.0107  | <a href="#">HEDVTKQLAEVALHVSNLNGISAVSK</a> |                      |

Mascot: <http://www.matrixscience.com/>

# MASCOT SCIENCE Mascot Search Results

## Peptide View

MS/MS Fragmentation of **NLFLNHSENAKDIAPTLTLYVGKK**

Found in **H3BS21** in **con\_Xuniprot\_HUMAN3**, H3BS21\_HUMAN Haptoglobin (Fragment) OS=Homo sapiens GN=HP PE=2 SV=1

Match to Query 25834: 2859.508896 from(715.884500,4+) intensity(848562.5625) rtinseconds(1740) scans(4280) index(12659)

Title: 111019\_Est\_ISCardio\_NMI\_YS\_G\_9Spectrum3741\_scans\_4280

Data file C:\mascot\20140703\_Tmgf\_1D\CSV\_UseAnalysis\MasterCSV\All\_Glyco\mgf\ptm\UC18ERLIC\_PTM\_35D.mgf

Click mouse within plot area to zoom in by factor of two about that point

Or,  to  Da

Label all possible matches  Label matches used for scoring

Show Y-axis

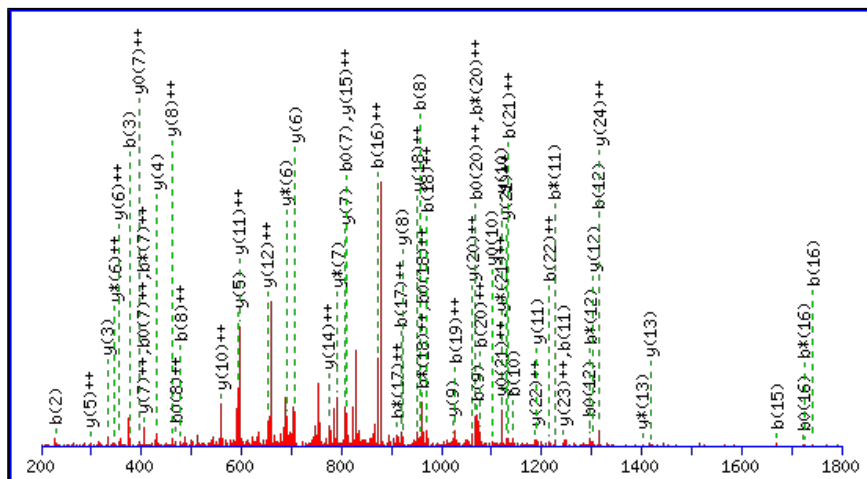

Monoisotopic mass of neutral peptide Mr(calc): 2859.5018

Fixed modifications: Carbamidomethyl (C) (apply to specified residues or termini only)

Variable modifications:

N1 : Deamidated (NQ)

N9 : Deamidated (NQ)

Ions Score: 59 Expect: 0.00017

Matches : 65/276 fragment ions using 141 most intense peaks ([help](#))

| #  | b                | b <sup>++</sup>  | b <sup>*</sup>   | b <sup>*++</sup> | b <sup>0</sup>   | b <sup>0++</sup> | Seq. | y                | y <sup>++</sup>  | y <sup>*</sup>   | y <sup>*++</sup> | y <sup>0</sup>   | y <sup>0++</sup> | #  |
|----|------------------|------------------|------------------|------------------|------------------|------------------|------|------------------|------------------|------------------|------------------|------------------|------------------|----|
| 1  | 116.0342         | 58.5207          | 99.0077          | 50.0075          |                  |                  | N    |                  |                  |                  |                  |                  |                  | 26 |
| 2  | <b>229.1183</b>  | 115.0628         | 212.0917         | 106.5495         |                  |                  | L    | 2745.4822        | 1373.2447        | 2728.4556        | 1364.7314        | 2727.4716        | 1364.2394        | 25 |
| 3  | <b>376.1867</b>  | 188.5970         | 359.1601         | 180.0837         |                  |                  | F    | 2632.3981        | <b>1316.7027</b> | 2615.3715        | 1308.1894        | 2614.3875        | 1307.6974        | 24 |
| 4  | 489.2708         | 245.1390         | 472.2442         | 236.6257         |                  |                  | L    | 2485.3297        | <b>1243.1685</b> | 2468.3031        | 1234.6552        | 2467.3191        | 1234.1632        | 23 |
| 5  | 603.3137         | 302.1605         | 586.2871         | 293.6472         |                  |                  | N    | 2372.2456        | <b>1186.6264</b> | 2355.2191        | 1178.1132        | 2354.2351        | 1177.6212        | 22 |
| 6  | 740.3726         | 370.6899         | 723.3461         | 362.1767         |                  |                  | H    | 2258.2027        | <b>1129.6050</b> | 2241.1761        | <b>1121.0917</b> | 2240.1921        | <b>1120.5997</b> | 21 |
| 7  | 827.4046         | 414.2060         | 810.3781         | <b>405.6927</b>  | <b>809.3941</b>  | <b>405.2007</b>  | S    | 2121.1438        | <b>1061.0755</b> | 2104.1172        | 1052.5623        | 2103.1332        | 1052.0702        | 20 |
| 8  | <b>956.4472</b>  | <b>478.7272</b>  | 939.4207         | 470.2140         | 938.4367         | <b>469.7220</b>  | E    | 2034.1118        | 1017.5595        | 2017.0852        | 1009.0462        | 2016.1012        | 1008.5542        | 19 |
| 9  | <b>1071.4742</b> | 536.2407         | 1054.4476        | 527.7274         | 1053.4636        | 527.2354         | N    | 1905.0692        | <b>953.0382</b>  | 1888.0426        | 944.5249         | 1887.0586        | 944.0329         | 18 |
| 10 | <b>1142.5113</b> | 571.7593         | 1125.4847        | 563.2460         | 1124.5007        | 562.7540         | A    | 1790.0422        | 895.5247         | 1773.0157        | 887.0115         | 1772.0316        | 886.5195         | 17 |
| 11 | <b>1243.5590</b> | 622.2831         | <b>1226.5324</b> | 613.7698         | 1225.5484        | 613.2778         | T    | 1719.0051        | 860.0062         | 1701.9786        | 851.4929         | 1700.9945        | 851.0009         | 16 |
| 12 | <b>1314.5961</b> | 657.8017         | <b>1297.5695</b> | 649.2884         | <b>1296.5855</b> | 648.7964         | A    | 1617.9574        | <b>809.4823</b>  | 1600.9309        | 800.9691         | 1599.9469        | 800.4771         | 15 |
| 13 | 1442.6910        | 721.8492         | 1425.6645        | 713.3359         | 1424.6805        | 712.8439         | K    | 1546.9203        | <b>773.9638</b>  | 1529.8938        | 765.4505         | 1528.9097        | 764.9585         | 14 |
| 14 | 1557.7180        | 779.3626         | 1540.6914        | 770.8494         | 1539.7074        | 770.3573         | D    | <b>1418.8253</b> | 709.9163         | <b>1401.7988</b> | 701.4030         | 1400.8148        | 700.9110         | 13 |
| 15 | <b>1670.8020</b> | 835.9047         | 1653.7755        | 827.3914         | 1652.7915        | 826.8994         | I    | <b>1303.7984</b> | <b>652.4028</b>  | 1286.7719        | 643.8896         | 1285.7878        | 643.3976         | 12 |
| 16 | <b>1741.8392</b> | <b>871.4232</b>  | <b>1724.8126</b> | 862.9099         | <b>1723.8286</b> | 862.4179         | A    | <b>1190.7143</b> | <b>595.8608</b>  | 1173.6878        | 587.3475         | 1172.7038        | 586.8555         | 11 |
| 17 | 1838.8919        | <b>919.9496</b>  | 1821.8654        | <b>911.4363</b>  | 1820.8814        | 910.9443         | P    | <b>1119.6772</b> | <b>560.3423</b>  | 1102.6507        | 551.8290         | <b>1101.6667</b> | 551.3370         | 10 |
| 18 | 1939.9396        | <b>970.4734</b>  | 1922.9130        | <b>961.9602</b>  | 1921.9290        | <b>961.4682</b>  | T    | <b>1022.6245</b> | 511.8159         | 1005.5979        | 503.3026         | 1004.6139        | 502.8106         | 9  |
| 19 | 2053.0237        | <b>1027.0155</b> | 2035.9971        | 1018.5022        | 2035.0131        | 1018.0102        | L    | <b>921.5768</b>  | <b>461.2920</b>  | 904.5502         | 452.7788         | 903.5662         | 452.2867         | 8  |
| 20 | 2154.0713        | <b>1077.5393</b> | 2137.0448        | <b>1069.0260</b> | 2136.0608        | <b>1068.5340</b> | T    | <b>808.4927</b>  | <b>404.7500</b>  | <b>791.4662</b>  | 396.2367         | 790.4822         | <b>395.7447</b>  | 7  |
| 21 | 2267.1554        | <b>1134.0813</b> | 2250.1289        | 1125.5681        | 2249.1448        | 1125.0761        | L    | <b>707.4450</b>  | <b>354.2262</b>  | <b>690.4185</b>  | <b>345.7129</b>  |                  |                  | 6  |
| 22 | 2430.2187        | <b>1215.6130</b> | 2413.1922        | 1207.0997        | 2412.2082        | 1206.6077        | Y    | <b>594.3610</b>  | <b>297.6841</b>  | 577.3344         | 289.1709         |                  |                  | 5  |

|    |           |           |           |           |           |           |   |          |          |          |          |  |  |   |
|----|-----------|-----------|-----------|-----------|-----------|-----------|---|----------|----------|----------|----------|--|--|---|
| 23 | 2529.2871 | 1265.1472 | 2512.2606 | 1256.6339 | 2511.2766 | 1256.1419 | V | 431.2976 | 216.1525 | 414.2711 | 207.6392 |  |  | 4 |
| 24 | 2586.3086 | 1293.6579 | 2569.2821 | 1285.1447 | 2568.2980 | 1284.6527 | G | 332.2292 | 166.6183 | 315.2027 | 158.1050 |  |  | 3 |
| 25 | 2714.4036 | 1357.7054 | 2697.3770 | 1349.1922 | 2696.3930 | 1348.7001 | K | 275.2078 | 138.1075 | 258.1812 | 129.5942 |  |  | 2 |
| 26 |           |           |           |           |           |           | K | 147.1128 | 74.0600  | 130.0863 | 65.5468  |  |  | 1 |

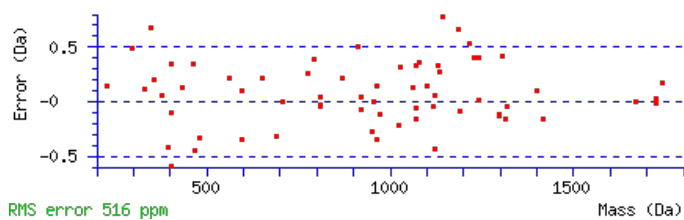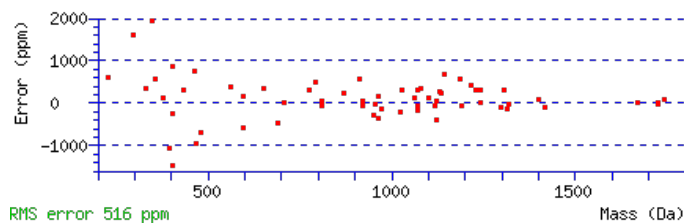

NCBI BLAST search of [NLFLNHSENATAKDIAPTLTYVGKK](#)  
 (Parameters: blastp, nr protein database, expect=20000, no filter, PAM30)  
 Other BLAST [web gateways](#)

All matches to this query

| Score | Mr(calc)  | Delta  | Sequence                                    | Site Analysis            |
|-------|-----------|--------|---------------------------------------------|--------------------------|
| 59.1  | 2859.5018 | 0.0071 | <a href="#">NLFLNHSENATAKDIAPTLTYVGKK</a>   | Deamidated N1, N9 52.34% |
| 58.1  | 2859.5018 | 0.0071 | <a href="#">NLFLNHSENATAKDIAPTLTYVGKK</a>   | Deamidated N5, N9 41.57% |
| 49.8  | 2859.5018 | 0.0071 | <a href="#">NLFLNHSENATAKDIAPTLTYVGKK</a>   | Deamidated N1, N5 6.09%  |
| 44.6  | 2858.5178 | 0.9911 | <a href="#">NLFLNHSENATAKDIAPTLTYVGKK</a>   |                          |
| 42.3  | 2858.5178 | 0.9911 | <a href="#">NLFLNHSENATAKDIAPTLTYVGKK</a>   |                          |
| 26.6  | 2858.5178 | 0.9911 | <a href="#">NLFLNHSENATAKDIAPTLTYVGKK</a>   |                          |
| 6.3   | 2858.4973 | 1.0116 | <a href="#">HKPQAPVIVKTEEVINMHTFNDRR</a>    |                          |
| 4.4   | 2857.4947 | 2.0142 | <a href="#">ITGVGAVPLPASGNSFDVRPSQGYRRR</a> |                          |
| 2.3   | 2858.4940 | 1.0149 | <a href="#">GRSFKQTSALVHEVHIQLSEWHR</a>     |                          |
| 2.3   | 2857.4947 | 2.0142 | <a href="#">ITGVGAVPLPASGNSFDVRPSQGYRRR</a> |                          |

Mascot: <http://www.matrixscience.com/>

# MATRIX SCIENCE Mascot Search Results

## Peptide View

MS/MS Fragmentation of **QLVEIEKVVLPNYSQVDIGLIK**

Found in **H3BS21** in **con\_Xuniprot\_HUMAN3**, H3BS21\_HUMAN Haptoglobin (Fragment) OS=Homo sapiens GN=HP PE=2 SV=1

Match to Query 22352: 2634.472242 from(879.164690,3+) intensity(51922.9922) rtinseconds(2127) scans(5498) index(24762)

Title: 111019\_Est\_ML\_YS\_G\_06Spectrum4782\_scans\_\_5498

Data file C:\mascot\20140703\_Tmgf\_1D\CSV\_UseAnalysis\MasterCSV\All\_Glyco\mgf\ptm\UC18ERLIC\_PTM\_35D.mgf

Click mouse within plot area to zoom in by factor of two about that point

Or, to Da

Label all possible matches Label matches used for scoring

Show Y-axis

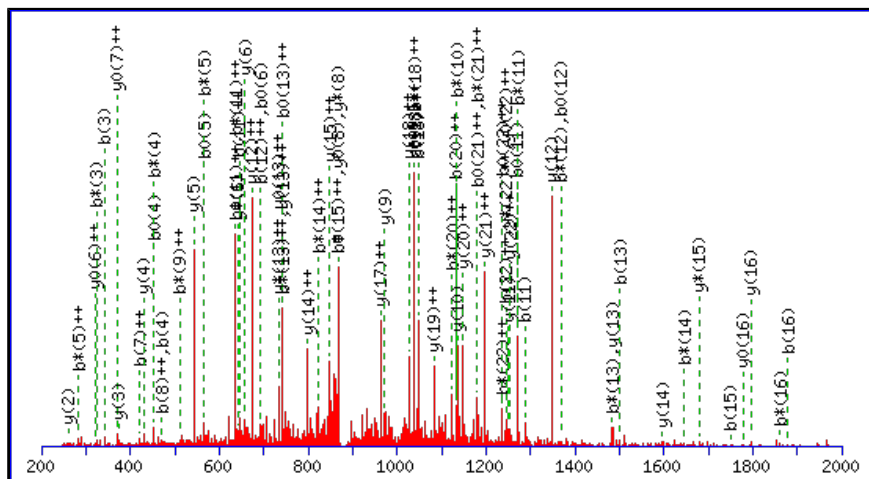

Monoisotopic mass of neutral peptide Mr(calc): 2634.4632

Fixed modifications: Carbamidomethyl (C) (apply to specified residues or termini only)

Variable modifications:

N13 : Deamidated (NQ)

Ions Score: 59 Expect: 5.3e-005

Matches : 77/248 fragment ions using 158 most intense peaks (help)

| #  | b         | b <sup>++</sup> | b <sup>*</sup> | b <sup>*++</sup> | b <sup>0</sup> | b <sup>0++</sup> | Seq. | y         | y <sup>++</sup> | y <sup>*</sup> | y <sup>*++</sup> | y <sup>0</sup> | y <sup>0++</sup> | #  |
|----|-----------|-----------------|----------------|------------------|----------------|------------------|------|-----------|-----------------|----------------|------------------|----------------|------------------|----|
| 1  | 129.0659  | 65.0366         | 112.0393       | 56.5233          |                |                  | Q    |           |                 |                |                  |                |                  | 23 |
| 2  | 242.1499  | 121.5786        | 225.1234       | 113.0653         |                |                  | L    | 2507.4120 | 1254.2096       | 2490.3854      | 1245.6963        | 2489.4014      | 1245.2043        | 22 |
| 3  | 341.2183  | 171.1128        | 324.1918       | 162.5995         |                |                  | V    | 2394.3279 | 1197.6676       | 2377.3013      | 1189.1543        | 2376.3173      | 1188.6623        | 21 |
| 4  | 470.2609  | 235.6341        | 453.2344       | 227.1208         | 452.2504       | 226.6288         | E    | 2295.2595 | 1148.1334       | 2278.2329      | 1139.6201        | 2277.2489      | 1139.1281        | 20 |
| 5  | 583.3450  | 292.1761        | 566.3184       | 283.6629         | 565.3344       | 283.1709         | I    | 2166.2169 | 1083.6121       | 2149.1903      | 1075.0988        | 2148.2063      | 1074.6068        | 19 |
| 6  | 712.3876  | 356.6974        | 695.3610       | 348.1842         | 694.3770       | 347.6921         | E    | 2053.1328 | 1027.0700       | 2036.1063      | 1018.5568        | 2035.1223      | 1018.0648        | 18 |
| 7  | 840.4825  | 420.7449        | 823.4560       | 412.2316         | 822.4720       | 411.7396         | K    | 1924.0902 | 962.5488        | 1907.0637      | 954.0355         | 1906.0797      | 953.5435         | 17 |
| 8  | 939.5510  | 470.2791        | 922.5244       | 461.7658         | 921.5404       | 461.2738         | V    | 1795.9953 | 898.5013        | 1778.9687      | 889.9880         | 1777.9847      | 889.4960         | 16 |
| 9  | 1038.6194 | 519.8133        | 1021.5928      | 511.3001         | 1020.6088      | 510.8080         | V    | 1696.9268 | 848.9671        | 1679.9003      | 840.4538         | 1678.9163      | 839.9618         | 15 |
| 10 | 1151.7034 | 576.3554        | 1134.6769      | 567.8421         | 1133.6929      | 567.3501         | L    | 1597.8584 | 799.4329        | 1580.8319      | 790.9196         | 1579.8479      | 790.4276         | 14 |
| 11 | 1288.7623 | 644.8848        | 1271.7358      | 636.3715         | 1270.7518      | 635.8795         | H    | 1484.7744 | 742.8908        | 1467.7478      | 734.3775         | 1466.7638      | 733.8855         | 13 |
| 12 | 1385.8151 | 693.4112        | 1368.7886      | 684.8979         | 1367.8045      | 684.4059         | P    | 1347.7155 | 674.3614        | 1330.6889      | 665.8481         | 1329.7049      | 665.3561         | 12 |
| 13 | 1500.8421 | 750.9247        | 1483.8155      | 742.4114         | 1482.8315      | 741.9194         | N    | 1250.6627 | 625.8350        | 1233.6361      | 617.3217         | 1232.6521      | 616.8297         | 11 |
| 14 | 1663.9054 | 832.4563        | 1646.8788      | 823.9431         | 1645.8948      | 823.4510         | Y    | 1135.6358 | 568.3215        | 1118.6092      | 559.8082         | 1117.6252      | 559.3162         | 10 |
| 15 | 1750.9374 | 875.9723        | 1733.9109      | 867.4591         | 1732.9268      | 866.9671         | S    | 972.5724  | 486.7898        | 955.5459       | 478.2766         | 954.5619       | 477.7846         | 9  |
| 16 | 1878.9960 | 940.0016        | 1861.9694      | 931.4884         | 1860.9854      | 930.9964         | Q    | 885.5404  | 443.2738        | 868.5138       | 434.7606         | 867.5298       | 434.2686         | 8  |
| 17 | 1978.0644 | 989.5358        | 1961.0379      | 981.0226         | 1960.0538      | 980.5306         | V    | 757.4818  | 379.2445        | 740.4553       | 370.7313         | 739.4713       | 370.2393         | 7  |
| 18 | 2093.0913 | 1047.0493       | 2076.0648      | 1038.5360        | 2075.0808      | 1038.0440        | D    | 658.4134  | 329.7103        | 641.3869       | 321.1971         | 640.4028       | 320.7051         | 6  |
| 19 | 2206.1754 | 1103.5913       | 2189.1489      | 1095.0781        | 2188.1648      | 1094.5861        | I    | 543.3865  | 272.1969        | 526.3599       | 263.6836         |                |                  | 5  |
| 20 | 2263.1969 | 1132.1021       | 2246.1703      | 1123.5888        | 2245.1863      | 1123.0968        | G    | 430.3024  | 215.6548        | 413.2758       | 207.1416         |                |                  | 4  |
| 21 | 2376.2809 | 1188.6441       | 2359.2544      | 1180.1308        | 2358.2704      | 1179.6388        | L    | 373.2809  | 187.1441        | 356.2544       | 178.6308         |                |                  | 3  |
| 22 | 2489.3650 | 1245.1861       | 2472.3385      | 1236.6729        | 2471.3544      | 1236.1809        | I    | 260.1969  | 130.6021        | 243.1703       | 122.0888         |                |                  | 2  |
| 23 |           |                 |                |                  |                |                  | K    | 147.1128  | 74.0600         | 130.0863       | 65.5468          |                |                  | 1  |

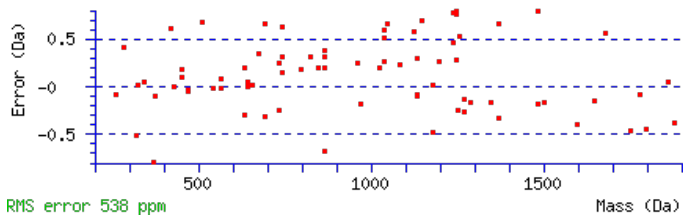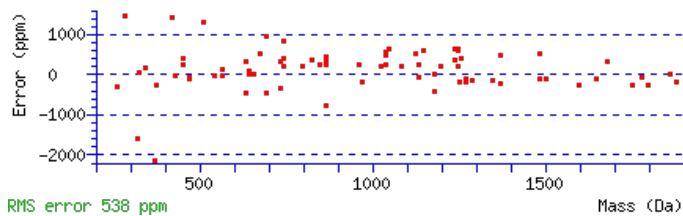

NCBI **BLAST** search of [QLVEIEKVVLPNYSQVDIGLIK](#)  
 (Parameters: blastp, nr protein database, expect=20000, no filter, PAM30)  
 Other BLAST [web gateways](#)

**All matches to this query**

| Score | Mr(calc)  | Delta  | Sequence                               | Site Analysis         |
|-------|-----------|--------|----------------------------------------|-----------------------|
| 59.1  | 2634.4632 | 0.0090 | <a href="#">QLVEIEKVVLPNYSQVDIGLIK</a> | Deamidated N13 53.78% |
| 58.5  | 2634.4632 | 0.0090 | <a href="#">QLVEIEKVVLPNYSQVDIGLIK</a> | Deamidated Q16 46.20% |
| 39.3  | 2633.4792 | 0.9930 | <a href="#">QLVEIEKVVLPNYSQVDIGLIK</a> |                       |
| 23.7  | 2634.4632 | 0.0090 | <a href="#">QLVEIEKVVLPNYSQVDIGLIK</a> | Deamidated Q1 0.02%   |

Mascot: <http://www.matrixscience.com/>

# MASCOT SCIENCE Mascot Search Results

## Peptide View

MS/MS Fragmentation of **NLFLNHSENATAK**

Found in **H3BS21** in **con\_Xuniprot\_HUMAN3**, H3BS21\_HUMAN Haptoglobin (Fragment) OS=Homo sapiens GN=HP PE=2 SV=1

Match to Query 4260: 1458.713448 from(730.364000,2+) intensity(50538.0586) rtinseconds(505) scans(1116) index(6157)

Title: 111019\_Est\_ISCardio\_NMI\_YP\_G\_9Spectrum968\_scans\_1116

Data file C:\\mascot\\20140703\_Tmgf\_1D\\CSV\_UseAnalysis\\MasterCSV\\All\_Glyco\\mgf\\ptm\\UC18ERLIC\_PTM\_35D.mgf

Click mouse within plot area to zoom in by factor of two about that point

Or, to Da

Label all possible matches Label matches used for scoring

Show Y-axis

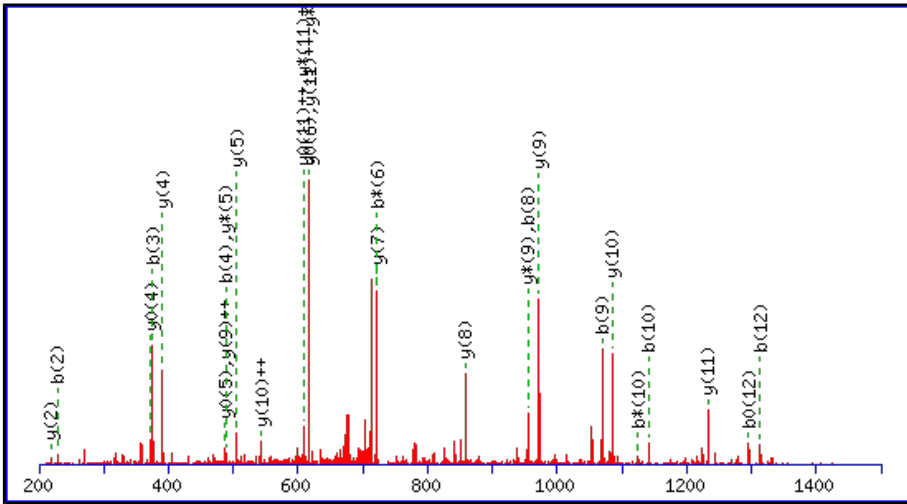

Monoisotopic mass of neutral peptide Mr(calc): 1458.7103

Fixed modifications: Carbamidomethyl (C) (apply to specified residues or termini only)

Variable modifications:

N9 : Deamidated (NQ)

Ions Score: 58 Expect: 0.00029

Matches : 29/128 fragment ions using 37 most intense peaks ([help](#))

| #  | b                | b <sup>++</sup> | b <sup>*</sup>   | b <sup>*++</sup> | b <sup>0</sup>   | b <sup>0++</sup> | Seq. | y                | y <sup>++</sup> | y <sup>*</sup>  | y <sup>*++</sup> | y <sup>0</sup>  | y <sup>0++</sup> | #  |
|----|------------------|-----------------|------------------|------------------|------------------|------------------|------|------------------|-----------------|-----------------|------------------|-----------------|------------------|----|
| 1  | 115.0502         | 58.0287         | 98.0237          | 49.5155          |                  |                  | N    |                  |                 |                 |                  |                 |                  | 13 |
| 2  | <b>228.1343</b>  | 114.5708        | 211.1077         | 106.0575         |                  |                  | L    | 1345.6747        | 673.3410        | 1328.6481       | 664.8277         | 1327.6641       | 664.3357         | 12 |
| 3  | <b>375.2027</b>  | 188.1050        | 358.1761         | 179.5917         |                  |                  | F    | <b>1232.5906</b> | <b>616.7989</b> | 1215.5640       | <b>608.2857</b>  | 1214.5800       | <b>607.7937</b>  | 11 |
| 4  | <b>488.2867</b>  | 244.6470        | 471.2602         | 236.1337         |                  |                  | L    | <b>1085.5222</b> | <b>543.2647</b> | 1068.4956       | 534.7515         | 1067.5116       | 534.2594         | 10 |
| 5  | 602.3297         | 301.6685        | 585.3031         | 293.1552         |                  |                  | N    | <b>972.4381</b>  | <b>486.7227</b> | <b>955.4116</b> | 478.2094         | 954.4275        | 477.7174         | 9  |
| 6  | 739.3886         | 370.1979        | <b>722.3620</b>  | 361.6847         |                  |                  | H    | <b>858.3952</b>  | 429.7012        | 841.3686        | 421.1880         | 840.3846        | 420.6959         | 8  |
| 7  | 826.4206         | 413.7139        | 809.3941         | 405.2007         | 808.4100         | 404.7087         | S    | <b>721.3363</b>  | 361.1718        | 704.3097        | 352.6585         | 703.3257        | 352.1665         | 7  |
| 8  | <b>955.4632</b>  | 478.2352        | 938.4367         | 469.7220         | 937.4526         | 469.2300         | E    | 634.3042         | 317.6558        | <b>617.2777</b> | 309.1425         | <b>616.2937</b> | 308.6505         | 6  |
| 9  | <b>1070.4901</b> | 535.7487        | 1053.4636        | 527.2354         | 1052.4796        | 526.7434         | N    | <b>505.2617</b>  | 253.1345        | <b>488.2351</b> | 244.6212         | <b>487.2511</b> | 244.1292         | 5  |
| 10 | <b>1141.5273</b> | 571.2673        | <b>1124.5007</b> | 562.7540         | 1123.5167        | 562.2620         | A    | <b>390.2347</b>  | 195.6210        | 373.2082        | 187.1077         | <b>372.2241</b> | 186.6157         | 4  |
| 11 | 1242.5749        | 621.7911        | 1225.5484        | 613.2778         | 1224.5644        | 612.7858         | T    | 319.1976         | 160.1024        | 302.1710        | 151.5892         | 301.1870        | 151.0972         | 3  |
| 12 | <b>1313.6121</b> | 657.3097        | 1296.5855        | 648.7964         | <b>1295.6015</b> | 648.3044         | A    | <b>218.1499</b>  | 109.5786        | 201.1234        | 101.0653         |                 |                  | 2  |
| 13 |                  |                 |                  |                  |                  |                  | K    | 147.1128         | 74.0600         | 130.0863        | 65.5468          |                 |                  | 1  |

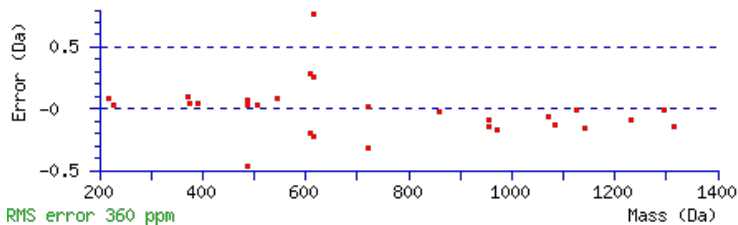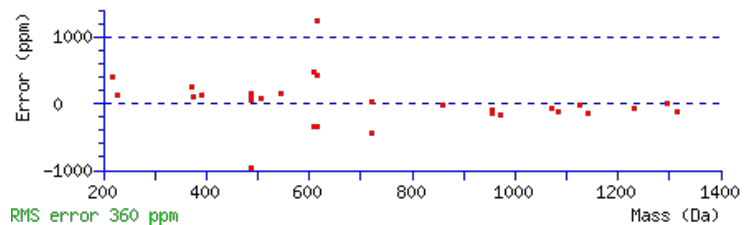



NCBI **BLAST** search of [NLFLNHSENATAK](#)

(Parameters: blastp, nr protein database, expect=20000, no filter, PAM30)

Other BLAST [web gateways](#)

**All matches to this query**

| Score | Mr(calc)  | Delta   | Sequence                      | Site Analysis        |
|-------|-----------|---------|-------------------------------|----------------------|
| 58.3  | 1458.7103 | 0.0032  | <a href="#">NLFLNHSENATAK</a> | Deamidated N9 99.14% |
| 37.4  | 1458.7103 | 0.0032  | <a href="#">NLFLNHSENATAK</a> | Deamidated N5 0.80%  |
| 26.5  | 1458.7103 | 0.0032  | <a href="#">NLFLNHSENATAK</a> | Deamidated N1 0.07%  |
| 23.1  | 1458.7089 | 0.0046  | <a href="#">LNQNELELENLK</a>  |                      |
| 21.0  | 1458.7202 | -0.0067 | <a href="#">INIQNKDIEAGDK</a> |                      |
| 16.9  | 1458.7103 | 0.0032  | <a href="#">RIQQALWNGAGNK</a> |                      |
| 16.6  | 1458.7201 | -0.0067 | <a href="#">QARQLENELDLK</a>  |                      |
| 14.4  | 1458.7103 | 0.0032  | <a href="#">SSSGWISHNKLNK</a> |                      |
| 14.1  | 1458.7098 | 0.0036  | <a href="#">SMVQKMIFSLNK</a>  |                      |
| 13.3  | 1458.7089 | 0.0045  | <a href="#">IEDLENEIEEVK</a>  |                      |

**Mascot:** <http://www.matrixscience.com/>

# MASCOT SCIENCE Mascot Search Results

## Peptide View

MS/MS Fragmentation of **GSFPWQAKMVSHHNLTTGATLINEQWLLTTAKNLFNLHSENATAK**

Found in **J3QR68** in **con\_Xuniprot\_HUMAN3**, J3QR68\_HUMAN Haptoglobin (Fragment) OS=Homo sapiens GN=HP PE=3 SV=1

Match to Query 28999: 5038.502620 from(1008.707800,5+) intensity(42294.6133) rtinseconds(2524) scans(6837) index(24172)

Title: 111019\_Est\_MI\_YS\_G\_05Spectrum5934\_scans\_\_6837

Data file C:\mascot\20140703\_Tmgf\_1D\CSV\_UseAnalysis\MasterCSV\All\_Glyco\mgf\ptm\UC18ERLIC\_PTM\_35D.mgf

Click mouse within plot area to zoom in by factor of two about that point

Or,  to  Da

Label all possible matches  Label matches used for scoring

Show Y-axis

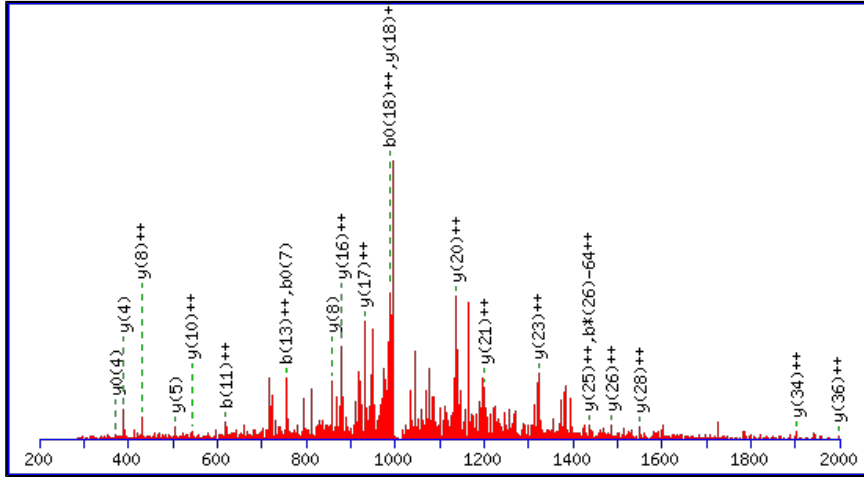

Monoisotopic mass of neutral peptide Mr(calc): 5038.4923

Fixed modifications: Carbamidomethyl (C) (apply to specified residues or termini only)

Variable modifications:

M9 : Oxidation (M), with neutral losses 0.0000 (shown in table), 63.9983

N33 : Deamidated (NQ)

N37 : Deamidated (NQ)

N41 : Deamidated (NQ)

Ions Score: 55 Expect: 0.00048

Matches : 22/776 fragment ions using 35 most intense peaks ([help](#))

| #  | b         | b <sup>++</sup> | b*        | b <sup>*++</sup> | b <sup>0</sup> | b <sup>0++</sup> | Seq. | y         | y <sup>++</sup> | y*        | y <sup>*++</sup> | y <sup>0</sup> | y <sup>0++</sup> | #  |
|----|-----------|-----------------|-----------|------------------|----------------|------------------|------|-----------|-----------------|-----------|------------------|----------------|------------------|----|
| 1  | 58.0287   | 29.5180         |           |                  |                |                  | G    |           |                 |           |                  |                |                  | 45 |
| 2  | 145.0608  | 73.0340         |           |                  | 127.0502       | 64.0287          | S    | 4982.4782 | 2491.7427       | 4965.4516 | 2483.2294        | 4964.4676      | 2482.7374        | 44 |
| 3  | 292.1292  | 146.5682        |           |                  | 274.1186       | 137.5629         | F    | 4895.4461 | 2448.2267       | 4878.4196 | 2439.7134        | 4877.4356      | 2439.2214        | 43 |
| 4  | 389.1819  | 195.0946        |           |                  | 371.1714       | 186.0893         | P    | 4748.3777 | 2374.6925       | 4731.3512 | 2366.1792        | 4730.3672      | 2365.6872        | 42 |
| 5  | 575.2613  | 288.1343        |           |                  | 557.2507       | 279.1290         | W    | 4651.3250 | 2326.1661       | 4634.2984 | 2317.6528        | 4633.3144      | 2317.1608        | 41 |
| 6  | 703.3198  | 352.1636        | 686.2933  | 343.6503         | 685.3093       | 343.1583         | Q    | 4465.2456 | 2233.1265       | 4448.2191 | 2224.6132        | 4447.2351      | 2224.1212        | 40 |
| 7  | 774.3570  | 387.6821        | 757.3304  | 379.1688         | 756.3464       | 378.6768         | A    | 4337.1871 | 2169.0972       | 4320.1605 | 2160.5839        | 4319.1765      | 2160.0919        | 39 |
| 8  | 902.4519  | 451.7296        | 885.4254  | 443.2163         | 884.4413       | 442.7243         | K    | 4266.1500 | 2133.5786       | 4249.1234 | 2125.0653        | 4248.1394      | 2124.5733        | 38 |
| 9  | 1049.4873 | 525.2473        | 1032.4608 | 516.7340         | 1031.4767      | 516.2420         | M    | 4138.0550 | 2069.5311       | 4121.0284 | 2061.0179        | 4120.0444      | 2060.5259        | 37 |
| 10 | 1148.5557 | 574.7815        | 1131.5292 | 566.2682         | 1130.5452      | 565.7762         | V    | 3991.0196 | 1996.0134       | 3973.9930 | 1987.5002        | 3973.0090      | 1987.0082        | 36 |
| 11 | 1235.5878 | 618.2975        | 1218.5612 | 609.7842         | 1217.5772      | 609.2922         | S    | 3891.9512 | 1946.4792       | 3874.9246 | 1937.9660        | 3873.9406      | 1937.4739        | 35 |
| 12 | 1372.6467 | 686.8270        | 1355.6201 | 678.3137         | 1354.6361      | 677.8217         | H    | 3804.9191 | 1902.9632       | 3787.8926 | 1894.4499        | 3786.9086      | 1893.9579        | 34 |
| 13 | 1509.7056 | 755.3564        | 1492.6790 | 746.8432         | 1491.6950      | 746.3511         | H    | 3667.8602 | 1834.4338       | 3650.8337 | 1825.9205        | 3649.8497      | 1825.4285        | 33 |
| 14 | 1623.7485 | 812.3779        | 1606.7220 | 803.8646         | 1605.7379      | 803.3726         | N    | 3530.8013 | 1765.9043       | 3513.7748 | 1757.3910        | 3512.7908      | 1756.8990        | 32 |
| 15 | 1736.8326 | 868.9199        | 1719.8060 | 860.4066         | 1718.8220      | 859.9146         | L    | 3416.7584 | 1708.8828       | 3399.7318 | 1700.3696        | 3398.7478      | 1699.8776        | 31 |
| 16 | 1837.8802 | 919.4438        | 1820.8537 | 910.9305         | 1819.8697      | 910.4385         | T    | 3303.6743 | 1652.3408       | 3286.6478 | 1643.8275        | 3285.6638      | 1643.3355        | 30 |
| 17 | 1938.9279 | 969.9676        | 1921.9014 | 961.4543         | 1920.9174      | 960.9623         | T    | 3202.6267 | 1601.8170       | 3185.6001 | 1593.3037        | 3184.6161      | 1592.8117        | 29 |
| 18 | 1995.9494 | 998.4783        | 1978.9228 | 989.9651         | 1977.9388      | 989.4731         | G    | 3101.5790 | 1551.2931       | 3084.5524 | 1542.7799        | 3083.5684      | 1542.2878        | 28 |
| 19 | 2066.9865 | 1033.9969       | 2049.9600 | 1025.4836        | 2048.9759      | 1024.9916        | A    | 3044.5575 | 1522.7824       | 3027.5310 | 1514.2691        | 3026.5469      | 1513.7771        | 27 |
| 20 | 2168.0342 | 1084.5207       | 2151.0076 | 1076.0075        | 2150.0236      | 1075.5154        | T    | 2973.5204 | 1487.2638       | 2956.4938 | 1478.7506        | 2955.5098      | 1478.2586        | 26 |
| 21 | 2281.1182 | 1141.0628       | 2264.0917 | 1132.5495        | 2263.1077      | 1132.0575        | L    | 2872.4727 | 1436.7400       | 2855.4462 | 1428.2267        | 2854.4622      | 1427.7347        | 25 |

|    |           |           |           |           |           |           |   |           |           |           |           |           |           |    |
|----|-----------|-----------|-----------|-----------|-----------|-----------|---|-----------|-----------|-----------|-----------|-----------|-----------|----|
| 22 | 2394.2023 | 1197.6048 | 2377.1758 | 1189.0915 | 2376.1917 | 1188.5995 | I | 2759.3887 | 1380.1980 | 2742.3621 | 1371.6847 | 2741.3781 | 1371.1927 | 24 |
| 23 | 2508.2452 | 1254.6263 | 2491.2187 | 1246.1130 | 2490.2347 | 1245.6210 | N | 2646.3046 | 1323.6559 | 2629.2780 | 1315.1427 | 2628.2940 | 1314.6507 | 23 |
| 24 | 2637.2878 | 1319.1476 | 2620.2613 | 1310.6343 | 2619.2773 | 1310.1423 | E | 2532.2617 | 1266.6345 | 2515.2351 | 1258.1212 | 2514.2511 | 1257.6292 | 22 |
| 25 | 2765.3464 | 1383.1768 | 2748.3199 | 1374.6636 | 2747.3358 | 1374.1716 | Q | 2403.2191 | 1202.1132 | 2386.1925 | 1193.5999 | 2385.2085 | 1193.1079 | 21 |
| 26 | 2951.4257 | 1476.2165 | 2934.3992 | 1467.7032 | 2933.4152 | 1467.2112 | W | 2275.1605 | 1138.0839 | 2258.1339 | 1129.5706 | 2257.1499 | 1129.0786 | 20 |
| 27 | 3064.5098 | 1532.7585 | 3047.4832 | 1524.2453 | 3046.4992 | 1523.7533 | L | 2089.0812 | 1045.0442 | 2072.0546 | 1036.5310 | 2071.0706 | 1036.0389 | 19 |
| 28 | 3177.5939 | 1589.3006 | 3160.5673 | 1580.7873 | 3159.5833 | 1580.2953 | L | 1975.9971 | 988.5022  | 1958.9706 | 979.9889  | 1957.9865 | 979.4969  | 18 |
| 29 | 3278.6415 | 1639.8244 | 3261.6150 | 1631.3111 | 3260.6310 | 1630.8191 | T | 1862.9131 | 931.9602  | 1845.8865 | 923.4469  | 1844.9025 | 922.9549  | 17 |
| 30 | 3379.6892 | 1690.3482 | 3362.6627 | 1681.8350 | 3361.6786 | 1681.3430 | T | 1761.8654 | 881.4363  | 1744.8388 | 872.9230  | 1743.8548 | 872.4310  | 16 |
| 31 | 3450.7263 | 1725.8668 | 3433.6998 | 1717.3535 | 3432.7158 | 1716.8615 | A | 1660.8177 | 830.9125  | 1643.7911 | 822.3992  | 1642.8071 | 821.9072  | 15 |
| 32 | 3578.8213 | 1789.9143 | 3561.7947 | 1781.4010 | 3560.8107 | 1780.9090 | K | 1589.7806 | 795.3939  | 1572.7540 | 786.8807  | 1571.7700 | 786.3886  | 14 |
| 33 | 3693.8482 | 1847.4278 | 3676.8217 | 1838.9145 | 3675.8377 | 1838.4225 | N | 1461.6856 | 731.3464  | 1444.6591 | 722.8332  | 1443.6751 | 722.3412  | 13 |
| 34 | 3806.9323 | 1903.9698 | 3789.9057 | 1895.4565 | 3788.9217 | 1894.9645 | L | 1346.6587 | 673.8330  | 1329.6321 | 665.3197  | 1328.6481 | 664.8277  | 12 |
| 35 | 3954.0007 | 1977.5040 | 3936.9742 | 1968.9907 | 3935.9901 | 1968.4987 | F | 1233.5746 | 617.2909  | 1216.5481 | 608.7777  | 1215.5640 | 608.2857  | 11 |
| 36 | 4067.0848 | 2034.0460 | 4050.0582 | 2025.5327 | 4049.0742 | 2025.0407 | L | 1086.5062 | 543.7567  | 1069.4796 | 535.2435  | 1068.4956 | 534.7515  | 10 |
| 37 | 4182.1117 | 2091.5595 | 4165.0852 | 2083.0462 | 4164.1012 | 2082.5542 | N | 973.4221  | 487.2147  | 956.3956  | 478.7014  | 955.4116  | 478.2094  | 9  |
| 38 | 4319.1706 | 2160.0890 | 4302.1441 | 2151.5757 | 4301.1601 | 2151.0837 | H | 858.3952  | 429.7012  | 841.3686  | 421.1880  | 840.3846  | 420.6959  | 8  |
| 39 | 4406.2027 | 2203.6050 | 4389.1761 | 2195.0917 | 4388.1921 | 2194.5997 | S | 721.3363  | 361.1718  | 704.3097  | 352.6585  | 703.3257  | 352.1665  | 7  |
| 40 | 4535.2452 | 2268.1263 | 4518.2187 | 2259.6130 | 4517.2347 | 2259.1210 | E | 634.3042  | 317.6558  | 617.2777  | 309.1425  | 616.2937  | 308.6505  | 6  |
| 41 | 4650.2722 | 2325.6397 | 4633.2456 | 2317.1265 | 4632.2616 | 2316.6345 | N | 505.2617  | 253.1345  | 488.2351  | 244.6212  | 487.2511  | 244.1292  | 5  |
| 42 | 4721.3093 | 2361.1583 | 4704.2828 | 2352.6450 | 4703.2987 | 2352.1530 | A | 390.2347  | 195.6210  | 373.2082  | 187.1077  | 372.2241  | 186.6157  | 4  |
| 43 | 4822.3570 | 2411.6821 | 4805.3304 | 2403.1689 | 4804.3464 | 2402.6768 | T | 319.1976  | 160.1024  | 302.1710  | 151.5892  | 301.1870  | 151.0972  | 3  |
| 44 | 4893.3941 | 2447.2007 | 4876.3676 | 2438.6874 | 4875.3835 | 2438.1954 | A | 218.1499  | 109.5786  | 201.1234  | 101.0653  |           |           | 2  |
| 45 |           |           |           |           |           |           | K | 147.1128  | 74.0600   | 130.0863  | 65.5468   |           |           | 1  |

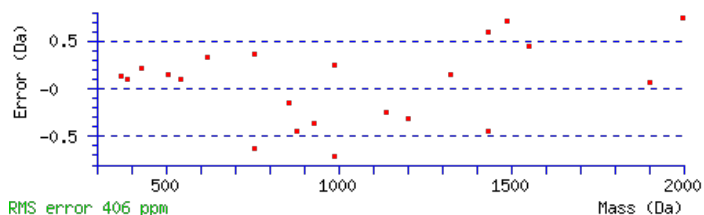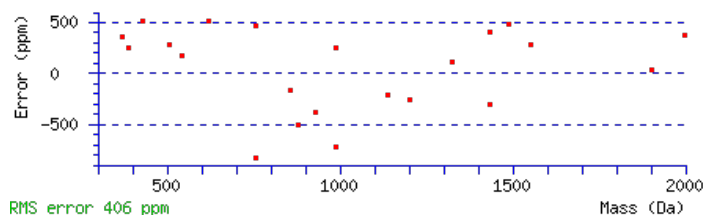

NCBI BLAST search of [GSFPWQAKMVSHHNLTTGATLINEQWLLTTAKNLFNLHSENATAK](#)

(Parameters: blastp, nr protein database, expect=20000, no filter, PAM30)

Other BLAST [web gateways](#)

All matches to this query

| Score | Mr(calc)  | Delta  | Sequence                                                      | Site Analysis                   |
|-------|-----------|--------|---------------------------------------------------------------|---------------------------------|
| 55.1  | 5038.4923 | 0.0103 | <a href="#">GSFPWQAKMVSHHNLTTGATLINEQWLLTTAKNLFNLHSENATAK</a> | Deamidated N33, N37, N41 44.52% |
| 54.1  | 5038.4923 | 0.0103 | <a href="#">GSFPWQAKMVSHHNLTTGATLINEQWLLTTAKNLFNLHSENATAK</a> | Deamidated Q6, N37, N41 34.88%  |
| 49.9  | 5038.4923 | 0.0103 | <a href="#">GSFPWQAKMVSHHNLTTGATLINEQWLLTTAKNLFNLHSENATAK</a> | Deamidated Q6, N14, N41 13.38%  |
| 46.7  | 5037.5083 | 0.9943 | <a href="#">GSFPWQAKMVSHHNLTTGATLINEQWLLTTAKNLFNLHSENATAK</a> |                                 |
| 46.0  | 5038.4923 | 0.0103 | <a href="#">GSFPWQAKMVSHHNLTTGATLINEQWLLTTAKNLFNLHSENATAK</a> | Deamidated Q25, N33, N37 5.48%  |
| 40.8  | 5037.5083 | 0.9943 | <a href="#">GSFPWQAKMVSHHNLTTGATLINEQWLLTTAKNLFNLHSENATAK</a> |                                 |
| 38.3  | 5038.4923 | 0.0103 | <a href="#">GSFPWQAKMVSHHNLTTGATLINEQWLLTTAKNLFNLHSENATAK</a> | Deamidated N23, Q25, N33 0.93%  |
| 30.5  | 5037.5083 | 0.9943 | <a href="#">GSFPWQAKMVSHHNLTTGATLINEQWLLTTAKNLFNLHSENATAK</a> |                                 |
| 25.1  | 5038.4923 | 0.0103 | <a href="#">GSFPWQAKMVSHHNLTTGATLINEQWLLTTAKNLFNLHSENATAK</a> | Deamidated N14, N23, Q25 0.04%  |
| 23.9  | 5037.5083 | 0.9943 | <a href="#">GSFPWQAKMVSHHNLTTGATLINEQWLLTTAKNLFNLHSENATAK</a> |                                 |

Mascot: <http://www.matrixscience.com/>

# MATRIX SCIENCE Mascot Search Results

## Peptide View

MS/MS Fragmentation of **MVSHHNLTTGATLINEQWLLTTAKNLFNLHSENAK**

Found in **J3QR68** in **con\_Xuniprot\_HUMAN3**, J3QR68\_HUMAN Haptoglobin (Fragment) OS=Homo sapiens GN=HP PE=3 SV=1

Match to Query 28881: 4137.075456 from(1035.276140,4+) intensity(23771.8164) rtinseconds(2600) scans(6879) index(19908)

Title: 111019\_Est\_ML\_YP\_G\_09Spectrum6100\_scans\_\_6879

Data file C:\\mascot\\20140703\_Tmgf\_1D\\CSV\_UseAnalysis\\MasterCSV\\All\_Glyco\\mgf\\ptm\\UC18ERLIC\_PTM\_35D.mgf

Click mouse within plot area to zoom in by factor of two about that point

Or,  to  Da

Label all possible matches  Label matches used for scoring

Show Y-axis

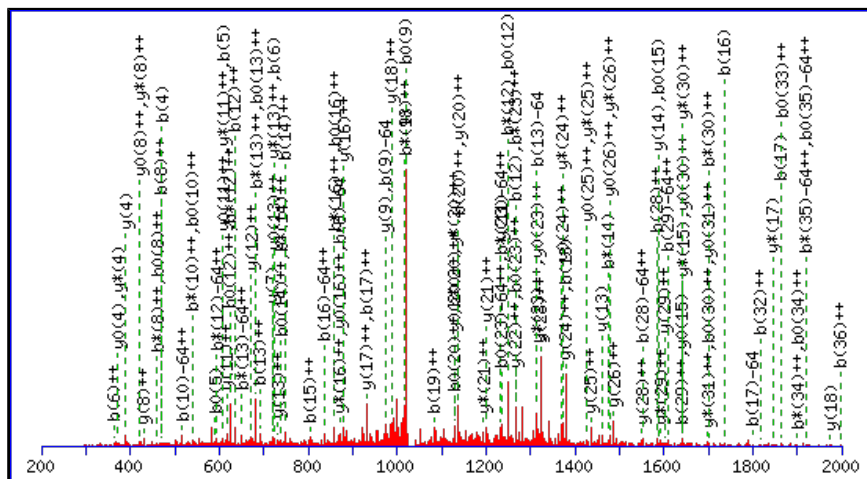

Monoisotopic mass of neutral peptide Mr(calc): 4136.0636

Fixed modifications: Carbamidomethyl (C) (apply to specified residues or termini only)

Variable modifications:

M1 : Oxidation (M), with neutral losses 0.0000 (shown in table), 63.9983

N25 : Deamidated (NQ)

N29 : Deamidated (NQ)

Ions Score: 55 Expect: 0.00063

Matches : 115/616 fragment ions using 170 most intense peaks ([help](#))

| #  | b                | b <sup>++</sup>  | b <sup>*</sup>   | b <sup>*++</sup> | b <sup>0</sup>   | b <sup>0++</sup> | Seq. | y                | y <sup>++</sup>  | y <sup>*</sup>   | y <sup>*++</sup> | y <sup>0</sup> | y <sup>0++</sup> | #  |
|----|------------------|------------------|------------------|------------------|------------------|------------------|------|------------------|------------------|------------------|------------------|----------------|------------------|----|
| 1  | 148.0427         | 74.5250          |                  |                  |                  |                  | M    |                  |                  |                  |                  |                |                  | 37 |
| 2  | 247.1111         | 124.0592         |                  |                  |                  |                  | V    | 3990.0356        | 1995.5214        | 3973.0090        | 1987.0081        | 3972.0250      | 1986.5161        | 36 |
| 3  | 334.1431         | 167.5752         |                  |                  | 316.1326         | 158.5699         | S    | 3890.9672        | 1945.9872        | 3873.9406        | 1937.4739        | 3872.9566      | 1936.9819        | 35 |
| 4  | <b>471.2020</b>  | 236.1047         |                  |                  | 453.1915         | 227.0994         | H    | 3803.9351        | 1902.4712        | 3786.9086        | 1893.9579        | 3785.9246      | 1893.4659        | 34 |
| 5  | <b>608.2609</b>  | 304.6341         |                  |                  | <b>590.2504</b>  | 295.6288         | H    | 3666.8762        | 1833.9417        | 3649.8497        | 1825.4285        | 3648.8657      | 1824.9365        | 33 |
| 6  | <b>722.3039</b>  | <b>361.6556</b>  | 705.2773         | 353.1423         | 704.2933         | 352.6503         | N    | 3529.8173        | 1765.4123        | 3512.7908        | 1756.8990        | 3511.8067      | 1756.4070        | 32 |
| 7  | 835.3879         | 418.1976         | 818.3614         | 409.6843         | 817.3774         | 409.1923         | L    | 3415.7744        | 1708.3908        | 3398.7478        | <b>1699.8776</b> | 3397.7638      | <b>1699.3855</b> | 31 |
| 8  | 936.4356         | <b>468.7214</b>  | 919.4091         | <b>460.2082</b>  | 918.4250         | <b>459.7162</b>  | T    | 3302.6903        | 1651.8488        | 3285.6638        | <b>1643.3355</b> | 3284.6798      | <b>1642.8435</b> | 30 |
| 9  | 1037.4833        | 519.2453         | <b>1020.4567</b> | 510.7320         | <b>1019.4727</b> | 510.2400         | T    | 3201.6426        | <b>1601.3250</b> | 3184.6161        | <b>1592.8117</b> | 3183.6321      | 1592.3197        | 29 |
| 10 | 1094.5048        | 547.7560         | 1077.4782        | <b>539.2427</b>  | 1076.4942        | <b>538.7507</b>  | G    | 3100.5950        | <b>1550.8011</b> | 3083.5684        | 1542.2878        | 3082.5844      | 1541.7958        | 28 |
| 11 | 1165.5419        | 583.2746         | 1148.5153        | 574.7613         | 1147.5313        | 574.2693         | A    | 3043.5735        | 1522.2904        | 3026.5469        | 1513.7771        | 3025.5629      | 1513.2851        | 27 |
| 12 | <b>1266.5895</b> | <b>633.7984</b>  | <b>1249.5630</b> | <b>625.2851</b>  | <b>1248.5790</b> | <b>624.7931</b>  | T    | 2972.5364        | <b>1486.7718</b> | 2955.5098        | <b>1478.2586</b> | 2954.5258      | <b>1477.7665</b> | 26 |
| 13 | <b>1379.6736</b> | <b>690.3404</b>  | 1362.6471        | <b>681.8272</b>  | 1361.6630        | <b>681.3352</b>  | L    | 2871.4887        | <b>1436.2480</b> | 2854.4622        | <b>1427.7347</b> | 2853.4781      | <b>1427.2427</b> | 25 |
| 14 | 1492.7577        | <b>746.8825</b>  | <b>1475.7311</b> | <b>738.3692</b>  | 1474.7471        | <b>737.8772</b>  | I    | 2758.4046        | <b>1379.7060</b> | 2741.3781        | <b>1371.1927</b> | 2740.3941      | <b>1370.7007</b> | 24 |
| 15 | 1606.8006        | <b>803.9039</b>  | 1589.7741        | 795.3907         | <b>1588.7900</b> | 794.8987         | N    | 2645.3206        | <b>1323.1639</b> | 2628.2940        | <b>1314.6506</b> | 2627.3100      | <b>1314.1586</b> | 23 |
| 16 | <b>1735.8432</b> | 868.4252         | 1718.8166        | <b>859.9120</b>  | 1717.8326        | <b>859.4200</b>  | E    | 2531.2776        | <b>1266.1425</b> | 2514.2511        | 1257.6292        | 2513.2671      | 1257.1372        | 22 |
| 17 | <b>1863.9018</b> | <b>932.4545</b>  | 1846.8752        | 923.9413         | 1845.8912        | 923.4492         | Q    | 2402.2351        | <b>1201.6212</b> | 2385.2085        | <b>1193.1079</b> | 2384.2245      | 1192.6159        | 21 |
| 18 | 2049.9811        | 1025.4942        | 2032.9545        | <b>1016.9809</b> | 2031.9705        | 1016.4889        | W    | 2274.1765        | <b>1137.5919</b> | 2257.1499        | <b>1129.0786</b> | 2256.1659      | <b>1128.5866</b> | 20 |
| 19 | 2163.0652        | <b>1082.0362</b> | 2146.0386        | 1073.5229        | 2145.0546        | 1073.0309        | L    | 2088.0972        | 1044.5522        | 2071.0706        | 1036.0389        | 2070.0866      | 1035.5469        | 19 |
| 20 | 2276.1492        | <b>1138.5782</b> | 2259.1227        | <b>1130.0650</b> | 2258.1386        | <b>1129.5730</b> | L    | <b>1975.0131</b> | <b>988.0102</b>  | 1957.9865        | 979.4969         | 1957.0025      | 979.0049         | 18 |
| 21 | 2377.1969        | 1189.1021        | 2360.1703        | 1180.5888        | 2359.1863        | 1180.0968        | T    | 1861.9290        | <b>931.4682</b>  | <b>1844.9025</b> | 922.9549         | 1843.9185      | 922.4629         | 17 |
| 22 | 2478.2446        | 1239.6259        | 2461.2180        | 1231.1126        | 2460.2340        | 1230.6206        | T    | 1760.8814        | <b>880.9443</b>  | 1743.8548        | <b>872.4310</b>  | 1742.8708      | <b>871.9390</b>  | 16 |

|    |           |           |           |           |           |           |   |           |          |           |          |           |          |    |
|----|-----------|-----------|-----------|-----------|-----------|-----------|---|-----------|----------|-----------|----------|-----------|----------|----|
| 23 | 2549.2817 | 1275.1445 | 2532.2551 | 1266.6312 | 2531.2711 | 1266.1392 | A | 1659.8337 | 830.4205 | 1642.8071 | 821.9072 | 1641.8231 | 821.4152 | 15 |
| 24 | 2677.3766 | 1339.1920 | 2660.3501 | 1330.6787 | 2659.3661 | 1330.1867 | K | 1588.7966 | 794.9019 | 1571.7700 | 786.3886 | 1570.7860 | 785.8966 | 14 |
| 25 | 2792.4036 | 1396.7054 | 2775.3770 | 1388.1922 | 2774.3930 | 1387.7002 | N | 1460.7016 | 730.8544 | 1443.6751 | 722.3412 | 1442.6910 | 721.8492 | 13 |
| 26 | 2905.4877 | 1453.2475 | 2888.4611 | 1444.7342 | 2887.4771 | 1444.2422 | L | 1345.6747 | 673.3410 | 1328.6481 | 664.8277 | 1327.6641 | 664.3357 | 12 |
| 27 | 3052.5561 | 1526.7817 | 3035.5295 | 1518.2684 | 3034.5455 | 1517.7764 | F | 1232.5906 | 616.7989 | 1215.5640 | 608.2857 | 1214.5800 | 607.7937 | 11 |
| 28 | 3165.6401 | 1583.3237 | 3148.6136 | 1574.8104 | 3147.6296 | 1574.3184 | L | 1085.5222 | 543.2647 | 1068.4956 | 534.7515 | 1067.5116 | 534.2594 | 10 |
| 29 | 3280.6671 | 1640.8372 | 3263.6405 | 1632.3239 | 3262.6565 | 1631.8319 | N | 972.4381  | 486.7227 | 955.4116  | 478.2094 | 954.4275  | 477.7174 | 9  |
| 30 | 3417.7260 | 1709.3666 | 3400.6994 | 1700.8534 | 3399.7154 | 1700.3614 | H | 857.4112  | 429.2092 | 840.3846  | 420.6959 | 839.4006  | 420.2039 | 8  |
| 31 | 3504.7580 | 1752.8826 | 3487.7315 | 1744.3694 | 3486.7475 | 1743.8774 | S | 720.3523  | 360.6798 | 703.3257  | 352.1665 | 702.3417  | 351.6745 | 7  |
| 32 | 3633.8006 | 1817.4039 | 3616.7741 | 1808.8907 | 3615.7900 | 1808.3987 | E | 633.3202  | 317.1638 | 616.2937  | 308.6505 | 615.3097  | 308.1585 | 6  |
| 33 | 3747.8435 | 1874.4254 | 3730.8170 | 1865.9121 | 3729.8330 | 1865.4201 | N | 504.2776  | 252.6425 | 487.2511  | 244.1292 | 486.2671  | 243.6372 | 5  |
| 34 | 3818.8807 | 1909.9440 | 3801.8541 | 1901.4307 | 3800.8701 | 1900.9387 | A | 390.2347  | 195.6210 | 373.2082  | 187.1077 | 372.2241  | 186.6157 | 4  |
| 35 | 3919.9283 | 1960.4678 | 3902.9018 | 1951.9545 | 3901.9178 | 1951.4625 | T | 319.1976  | 160.1024 | 302.1710  | 151.5892 | 301.1870  | 151.0972 | 3  |
| 36 | 3990.9654 | 1995.9864 | 3973.9389 | 1987.4731 | 3972.9549 | 1986.9811 | A | 218.1499  | 109.5786 | 201.1234  | 101.0653 |           |          | 2  |
| 37 |           |           |           |           |           |           | K | 147.1128  | 74.0600  | 130.0863  | 65.5468  |           |          | 1  |

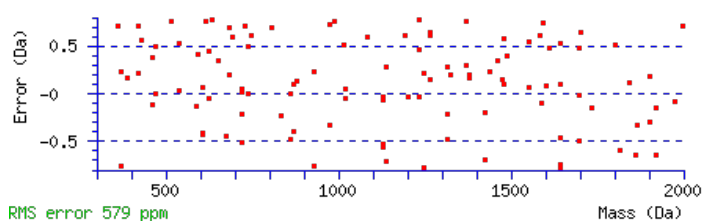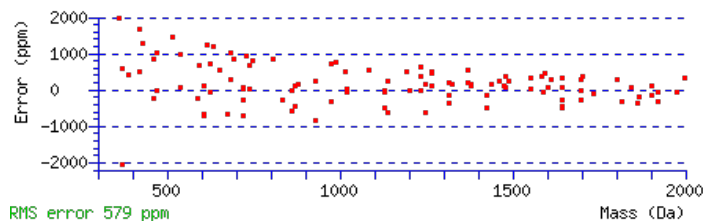

NCBI BLAST search of [MVSHHNLTTGATLINEQWLLTTAKNLFNHSENATAK](#)

(Parameters: blastp, nr protein database, expect=20000, no filter, PAM30)

Other BLAST [web gateways](#)

All matches to this query

| Score | Mr(calc)  | Delta  | Sequence                                             | Site Analysis              |
|-------|-----------|--------|------------------------------------------------------|----------------------------|
| 54.8  | 4136.0636 | 1.0118 | <a href="#">MVSHHNLTTGATLINEQWLLTTAKNLFNHSENATAK</a> | Deamidated N25, N29 33.67% |
| 52.9  | 4136.0636 | 1.0118 | <a href="#">MVSHHNLTTGATLINEQWLLTTAKNLFNHSENATAK</a> | Deamidated N25, N33 21.69% |
| 49.5  | 4136.0636 | 1.0118 | <a href="#">MVSHHNLTTGATLINEQWLLTTAKNLFNHSENATAK</a> | Deamidated N6, N33 9.87%   |
| 49.1  | 4136.0636 | 1.0118 | <a href="#">MVSHHNLTTGATLINEQWLLTTAKNLFNHSENATAK</a> | Deamidated N15, N33 9.11%  |
| 48.4  | 4136.0636 | 1.0118 | <a href="#">MVSHHNLTTGATLINEQWLLTTAKNLFNHSENATAK</a> | Deamidated Q17, N33 7.79%  |
| 44.7  | 4136.0636 | 1.0118 | <a href="#">MVSHHNLTTGATLINEQWLLTTAKNLFNHSENATAK</a> | Deamidated N29, N33 3.32%  |
| 42.3  | 4136.0636 | 1.0118 | <a href="#">MVSHHNLTTGATLINEQWLLTTAKNLFNHSENATAK</a> | Deamidated N15, N29 1.88%  |
| 42.2  | 4136.0636 | 1.0118 | <a href="#">MVSHHNLTTGATLINEQWLLTTAKNLFNHSENATAK</a> | Deamidated N15, N25 1.86%  |
| 42.1  | 4136.0636 | 1.0118 | <a href="#">MVSHHNLTTGATLINEQWLLTTAKNLFNHSENATAK</a> | Deamidated N6, N25 1.82%   |
| 42.1  | 4136.0636 | 1.0118 | <a href="#">MVSHHNLTTGATLINEQWLLTTAKNLFNHSENATAK</a> | Deamidated N6, N29 1.81%   |

Mascot: <http://www.matrixscience.com/>



# MATRIX SCIENCE Mascot Search Results

## Peptide View

MS/MS Fragmentation of **MVSHHNLTTGATLINEQWLLTTAKNLFNLHSEENATAK**

Found in **J3QR68** in **con\_Xuniprot\_HUMAN3**, J3QR68\_HUMAN Haptoglobin (Fragment) OS=Homo sapiens GN=HP PE=3 SV=1

Match to Query 28932: 4138.051936 from(1035.520260,4+) intensity(0.0000) rtinseconds(3556) scans(8820) index(26400)

Title: 111019\_Est\_MI\_YS\_G\_08Spectrum7678\_scans\_\_8820

Data file C:\mascot\20140703\_Tmgf\_1D\CSV\_UseAnalysis\MasterCSV\All\_Glyco\mgf\ptm\UC18ERLIC\_PTM\_35D.mgf

Click mouse within plot area to zoom in by factor of two about that point

Or, to Da

Label all possible matches Label matches used for scoring

Show Y-axis

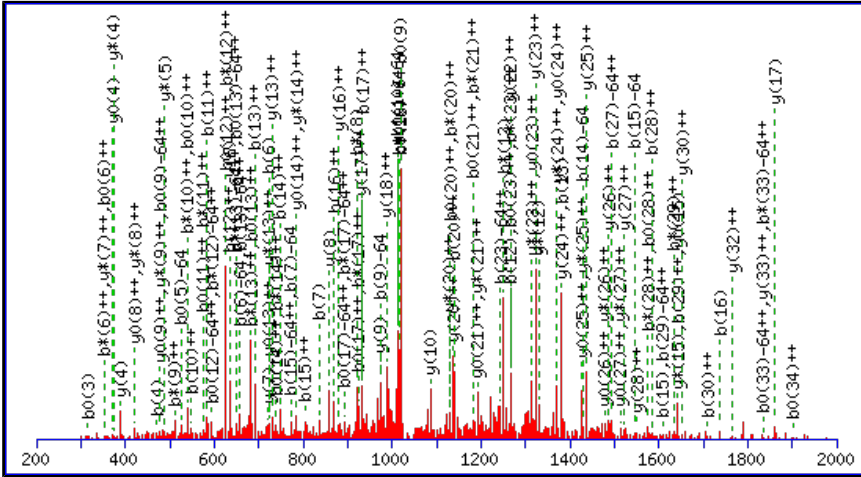

Monoisotopic mass of neutral peptide Mr(calc): 4138.0317

Fixed modifications: Carbamidomethyl (C) (apply to specified residues or termini only)

Variable modifications:

- M1 : Oxidation (M), with neutral losses 0.0000 (shown in table), 63.9983
- N6 : Deamidated (NQ)
- N15 : Deamidated (NQ)
- N29 : Deamidated (NQ)
- N33 : Deamidated (NQ)

Ions Score: 54 Expect: 0.00096

Matches : 122/616 fragment ions using 167 most intense peaks ([help](#))

| #  | b                | b <sup>++</sup>  | b <sup>*</sup>   | b <sup>*++</sup> | b <sup>0</sup>   | b <sup>0++</sup> | Seq.     | y                | y <sup>++</sup>  | y <sup>*</sup> | y <sup>*++</sup> | y <sup>0</sup> | y <sup>0++</sup> | #         |
|----|------------------|------------------|------------------|------------------|------------------|------------------|----------|------------------|------------------|----------------|------------------|----------------|------------------|-----------|
| 1  | 148.0427         | 74.5250          |                  |                  |                  |                  | <b>M</b> |                  |                  |                |                  |                |                  | <b>37</b> |
| 2  | 247.1111         | 124.0592         |                  |                  |                  |                  | <b>V</b> | 3992.0036        | 1996.5054        | 3974.9771      | 1987.9922        | 3973.9930      | 1987.5002        | <b>36</b> |
| 3  | 334.1431         | 167.5752         |                  |                  | <b>316.1326</b>  | 158.5699         | <b>S</b> | 3892.9352        | 1946.9712        | 3875.9086      | 1938.4580        | 3874.9246      | 1937.9660        | <b>35</b> |
| 4  | <b>471.2020</b>  | 236.1047         |                  |                  | 453.1915         | 227.0994         | <b>H</b> | 3805.9032        | 1903.4552        | 3788.8766      | 1894.9419        | 3787.8926      | 1894.4499        | <b>34</b> |
| 5  | 608.2609         | 304.6341         |                  |                  | 590.2504         | 295.6288         | <b>H</b> | 3668.8443        | <b>1834.9258</b> | 3651.8177      | 1826.4125        | 3650.8337      | 1825.9205        | <b>33</b> |
| 6  | <b>723.2879</b>  | 362.1476         | 706.2613         | <b>353.6343</b>  | 705.2773         | <b>353.1423</b>  | <b>N</b> | 3531.7853        | <b>1766.3963</b> | 3514.7588      | 1757.8830        | 3513.7748      | 1757.3910        | <b>32</b> |
| 7  | <b>836.3719</b>  | 418.6896         | 819.3454         | 410.1763         | 818.3614         | 409.6843         | <b>L</b> | 3416.7584        | 1708.8828        | 3399.7318      | 1700.3696        | 3398.7478      | 1699.8776        | <b>31</b> |
| 8  | 937.4196         | 469.2135         | <b>920.3931</b>  | 460.7002         | 919.4091         | 460.2082         | <b>T</b> | 3303.6743        | <b>1652.3408</b> | 3286.6478      | 1643.8275        | 3285.6638      | 1643.3355        | <b>30</b> |
| 9  | 1038.4673        | 519.7373         | 1021.4408        | <b>511.2240</b>  | <b>1020.4567</b> | 510.7320         | <b>T</b> | 3202.6267        | 1601.8170        | 3185.6001      | 1593.3037        | 3184.6161      | 1592.8117        | <b>29</b> |
| 10 | 1095.4888        | <b>548.2480</b>  | 1078.4622        | <b>539.7347</b>  | 1077.4782        | <b>539.2427</b>  | <b>G</b> | 3101.5790        | <b>1551.2931</b> | 3084.5524      | 1542.7799        | 3083.5684      | 1542.2878        | <b>28</b> |
| 11 | 1166.5259        | <b>583.7666</b>  | 1149.4993        | <b>575.2533</b>  | 1148.5153        | <b>574.7613</b>  | <b>A</b> | 3044.5575        | <b>1522.7824</b> | 3027.5310      | <b>1514.2691</b> | 3026.5469      | <b>1513.7771</b> | <b>27</b> |
| 12 | <b>1267.5736</b> | <b>634.2904</b>  | <b>1250.5470</b> | <b>625.7771</b>  | 1249.5630        | <b>625.2851</b>  | <b>T</b> | 2973.5204        | <b>1487.2638</b> | 2956.4938      | <b>1478.7506</b> | 2955.5098      | <b>1478.2586</b> | <b>26</b> |
| 13 | <b>1380.6576</b> | <b>690.8325</b>  | 1363.6311        | <b>682.3192</b>  | 1362.6471        | <b>681.8272</b>  | <b>L</b> | 2872.4727        | <b>1436.7400</b> | 2855.4462      | <b>1428.2267</b> | 2854.4622      | <b>1427.7347</b> | <b>25</b> |
| 14 | 1493.7417        | <b>747.3745</b>  | 1476.7151        | <b>738.8612</b>  | 1475.7311        | <b>738.3692</b>  | <b>I</b> | 2759.3887        | <b>1380.1980</b> | 2742.3621      | <b>1371.6847</b> | 2741.3781      | <b>1371.1927</b> | <b>24</b> |
| 15 | <b>1608.7686</b> | <b>804.8880</b>  | 1591.7421        | 796.3747         | 1590.7581        | 795.8827         | <b>N</b> | 2646.3046        | <b>1323.6559</b> | 2629.2780      | <b>1315.1427</b> | 2628.2940      | <b>1314.6506</b> | <b>23</b> |
| 16 | <b>1737.8112</b> | <b>869.4093</b>  | 1720.7847        | 860.8960         | 1719.8007        | 860.4040         | <b>E</b> | 2531.2776        | <b>1266.1425</b> | 2514.2511      | 1257.6292        | 2513.2671      | 1257.1372        | <b>22</b> |
| 17 | 1865.8698        | <b>933.4385</b>  | 1848.8433        | <b>924.9253</b>  | 1847.8592        | <b>924.4333</b>  | <b>Q</b> | 2402.2351        | 1201.6212        | 2385.2085      | <b>1193.1079</b> | 2384.2245      | <b>1192.6159</b> | <b>21</b> |
| 18 | 2051.9491        | 1026.4782        | 2034.9226        | <b>1017.9649</b> | 2033.9386        | <b>1017.4729</b> | <b>W</b> | 2274.1765        | <b>1137.5919</b> | 2257.1499      | <b>1129.0786</b> | 2256.1659      | 1128.5866        | <b>20</b> |
| 19 | 2165.0332        | 1083.0202        | 2148.0066        | 1074.5070        | 2147.0226        | 1074.0149        | <b>L</b> | 2088.0972        | 1044.5522        | 2071.0706      | 1036.0389        | 2070.0866      | 1035.5469        | <b>19</b> |
| 20 | 2278.1172        | <b>1139.5623</b> | 2261.0907        | <b>1131.0490</b> | 2260.1067        | <b>1130.5570</b> | <b>L</b> | 1975.0131        | <b>988.0102</b>  | 1957.9865      | 979.4969         | 1957.0025      | 979.0049         | <b>18</b> |
| 21 | 2379.1649        | 1190.0861        | 2362.1384        | <b>1181.5728</b> | 2361.1544        | <b>1181.0808</b> | <b>T</b> | <b>1861.9290</b> | <b>931.4682</b>  | 1844.9025      | 922.9549         | 1843.9185      | 922.4629         | <b>17</b> |

|    |           |           |           |           |           |           |   |           |          |           |          |           |          |    |
|----|-----------|-----------|-----------|-----------|-----------|-----------|---|-----------|----------|-----------|----------|-----------|----------|----|
| 22 | 2480.2126 | 1240.6099 | 2463.1861 | 1232.0967 | 2462.2020 | 1231.6047 | T | 1760.8814 | 880.9443 | 1743.8548 | 872.4310 | 1742.8708 | 871.9390 | 16 |
| 23 | 2551.2497 | 1276.1285 | 2534.2232 | 1267.6152 | 2533.2392 | 1267.1232 | A | 1659.8337 | 830.4205 | 1642.8071 | 821.9072 | 1641.8231 | 821.4152 | 15 |
| 24 | 2679.3447 | 1340.1760 | 2662.3181 | 1331.6627 | 2661.3341 | 1331.1707 | K | 1588.7966 | 794.9019 | 1571.7700 | 786.3886 | 1570.7860 | 785.8966 | 14 |
| 25 | 2793.3876 | 1397.1974 | 2776.3611 | 1388.6842 | 2775.3770 | 1388.1922 | N | 1460.7016 | 730.8544 | 1443.6750 | 722.3412 | 1442.6910 | 721.8492 | 13 |
| 26 | 2906.4717 | 1453.7395 | 2889.4451 | 1445.2262 | 2888.4611 | 1444.7342 | L | 1346.6587 | 673.8330 | 1329.6321 | 665.3197 | 1328.6481 | 664.8277 | 12 |
| 27 | 3053.5401 | 1527.2737 | 3036.5135 | 1518.7604 | 3035.5295 | 1518.2684 | F | 1233.5746 | 617.2909 | 1216.5481 | 608.7777 | 1215.5640 | 608.2857 | 11 |
| 28 | 3166.6242 | 1583.8157 | 3149.5976 | 1575.3024 | 3148.6136 | 1574.8104 | L | 1086.5062 | 543.7567 | 1069.4796 | 535.2435 | 1068.4956 | 534.7515 | 10 |
| 29 | 3281.6511 | 1641.3292 | 3264.6245 | 1632.8159 | 3263.6405 | 1632.3239 | N | 973.4221  | 487.2147 | 956.3956  | 478.7014 | 955.4116  | 478.2094 | 9  |
| 30 | 3418.7100 | 1709.8586 | 3401.6835 | 1701.3454 | 3400.6994 | 1700.8534 | H | 858.3952  | 429.7012 | 841.3686  | 421.1880 | 840.3846  | 420.6959 | 8  |
| 31 | 3505.7420 | 1753.3747 | 3488.7155 | 1744.8614 | 3487.7315 | 1744.3694 | S | 721.3363  | 361.1718 | 704.3097  | 352.6585 | 703.3257  | 352.1665 | 7  |
| 32 | 3634.7846 | 1817.8960 | 3617.7581 | 1809.3827 | 3616.7741 | 1808.8907 | E | 634.3042  | 317.6558 | 617.2777  | 309.1425 | 616.2937  | 308.6505 | 6  |
| 33 | 3749.8116 | 1875.4094 | 3732.7850 | 1866.8961 | 3731.8010 | 1866.4041 | N | 505.2617  | 253.1345 | 488.2351  | 244.6212 | 487.2511  | 244.1292 | 5  |
| 34 | 3820.8487 | 1910.9280 | 3803.8221 | 1902.4147 | 3802.8381 | 1901.9227 | A | 390.2347  | 195.6210 | 373.2082  | 187.1077 | 372.2241  | 186.6157 | 4  |
| 35 | 3921.8964 | 1961.4518 | 3904.8698 | 1952.9385 | 3903.8858 | 1952.4465 | T | 319.1976  | 160.1024 | 302.1710  | 151.5892 | 301.1870  | 151.0972 | 3  |
| 36 | 3992.9335 | 1996.9704 | 3975.9069 | 1988.4571 | 3974.9229 | 1987.9651 | A | 218.1499  | 109.5786 | 201.1234  | 101.0653 |           |          | 2  |
| 37 |           |           |           |           |           |           | K | 147.1128  | 74.0600  | 130.0863  | 65.5468  |           |          | 1  |

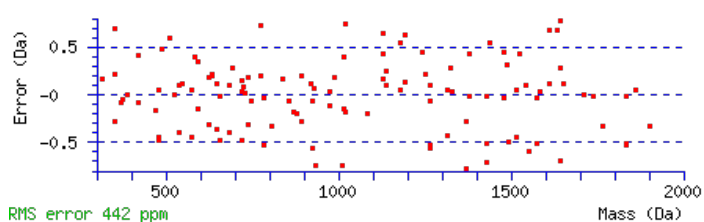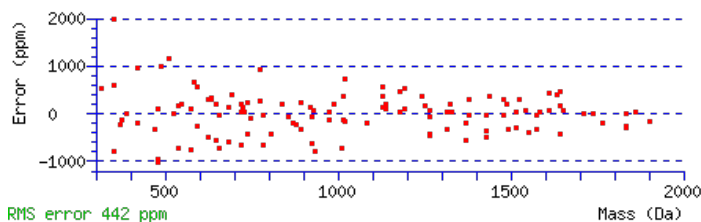

NCBI BLAST search of [MVSHHNLTGATLINEQWLLTTAKNLFNHSENATAK](#)

(Parameters: blastp, nr protein database, expect=20000, no filter, PAM30)

Other BLAST [web gateways](#)

All matches to this query

| Score | Mr(calc)  | Delta  | Sequence                                            | Site Analysis                       |
|-------|-----------|--------|-----------------------------------------------------|-------------------------------------|
| 53.6  | 4138.0317 | 0.0203 | <a href="#">MVSHHNLTGATLINEQWLLTTAKNLFNHSENATAK</a> | Deamidated N6, N15, N29, N33 41.80% |
| 51.8  | 4138.0317 | 0.0203 | <a href="#">MVSHHNLTGATLINEQWLLTTAKNLFNHSENATAK</a> | Deamidated N6, N15, N25, N33 27.12% |
| 48.7  | 4138.0317 | 0.0203 | <a href="#">MVSHHNLTGATLINEQWLLTTAKNLFNHSENATAK</a> | Deamidated N6, N15, Q17, N33 13.28% |
| 48.4  | 4137.0477 | 1.0043 | <a href="#">MVSHHNLTGATLINEQWLLTTAKNLFNHSENATAK</a> |                                     |
| 44.2  | 4138.0317 | 0.0203 | <a href="#">MVSHHNLTGATLINEQWLLTTAKNLFNHSENATAK</a> | Deamidated N6, N25, N29, N33 4.72%  |
| 41.0  | 4138.0317 | 0.0203 | <a href="#">MVSHHNLTGATLINEQWLLTTAKNLFNHSENATAK</a> | Deamidated N6, N15, N25, N29 2.28%  |
| 39.7  | 4138.0317 | 0.0203 | <a href="#">MVSHHNLTGATLINEQWLLTTAKNLFNHSENATAK</a> | Deamidated N6, Q17, N29, N33 1.70%  |
| 38.9  | 4138.0317 | 0.0203 | <a href="#">MVSHHNLTGATLINEQWLLTTAKNLFNHSENATAK</a> | Deamidated N6, N15, Q17, N29 1.39%  |
| 38.2  | 4138.0317 | 0.0203 | <a href="#">MVSHHNLTGATLINEQWLLTTAKNLFNHSENATAK</a> | Deamidated N6, Q17, N25, N33 1.19%  |
| 38.0  | 4138.0317 | 0.0203 | <a href="#">MVSHHNLTGATLINEQWLLTTAKNLFNHSENATAK</a> | Deamidated N15, N25, N29, N33 1.13% |

Mascot: <http://www.matrixscience.com/>



# MASCOT SCIENCE Mascot Search Results

## Peptide View

MS/MS Fragmentation of **NLFLNHSENAKDIAPTLTLYVGKK**

Found in **H3BS21** in **con\_Xuniprot\_HUMAN3**, H3BS21\_HUMAN Haptoglobin (Fragment) OS=Homo sapiens GN=HP PE=2 SV=1

Match to Query 25970: 2859.519252 from(954.180360,3+) intensity(27577.4766) rtinseconds(1730) scans(4381) index(24575)

Title: 111019\_Est\_MI\_YS\_G\_06Spectrum3812\_scans\_\_4381

Data file C:\mascot\20140703\_Tmgf\_1D\CSV\_UseAnalysis\MasterCSV\All\_Glyco\mgf\ptm\UC18ERLIC\_PTM\_35D.mgf

Click mouse within plot area to zoom in by factor of two about that point

Or, to Da

Label all possible matches Label matches used for scoring

Show Y-axis

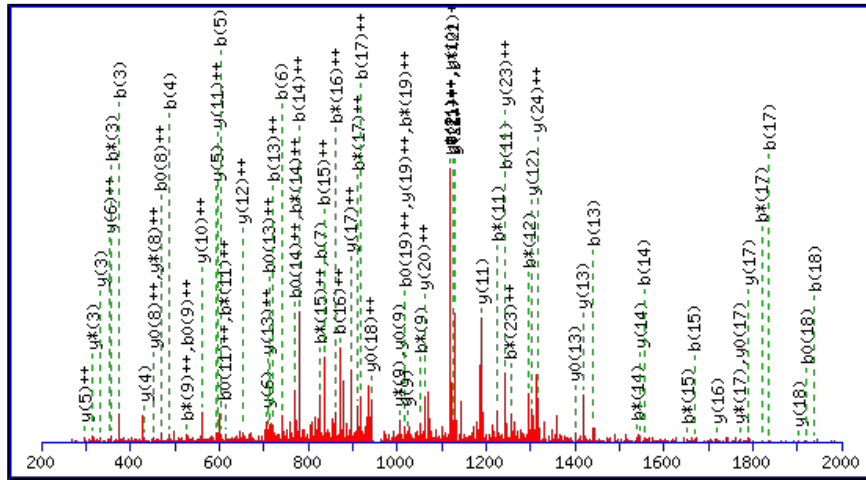

Monoisotopic mass of neutral peptide Mr(calc): 2858.5178

Fixed modifications: Carbamidomethyl (C) (apply to specified residues or termini only)

Variable modifications: N5 : Deamidated (NQ)

Ions Score: 54 Expect: 0.0005

Matches : 77/276 fragment ions using 169 most intense peaks ([help](#))

| #  | b                | b <sup>++</sup> | b*               | b <sup>***</sup> | b <sup>0</sup>   | b <sup>0++</sup> | Seq. | y                | y <sup>++</sup>  | y*               | y <sup>***</sup> | y <sup>0</sup>   | y <sup>0++</sup> | #  |
|----|------------------|-----------------|------------------|------------------|------------------|------------------|------|------------------|------------------|------------------|------------------|------------------|------------------|----|
| 1  | 115.0502         | 58.0287         | 98.0237          | 49.5155          |                  |                  | N    |                  |                  |                  |                  |                  |                  | 26 |
| 2  | 228.1343         | 114.5708        | 211.1077         | 106.0575         |                  |                  | L    | 2745.4822        | 1373.2447        | 2728.4556        | 1364.7314        | 2727.4716        | 1364.2394        | 25 |
| 3  | <b>375.2027</b>  | 188.1050        | <b>358.1761</b>  | 179.5917         |                  |                  | F    | 2632.3981        | <b>1316.7027</b> | 2615.3715        | 1308.1894        | 2614.3875        | 1307.6974        | 24 |
| 4  | <b>488.2867</b>  | 244.6470        | 471.2602         | 236.1337         |                  |                  | L    | 2485.3297        | <b>1243.1685</b> | 2468.3031        | 1234.6552        | 2467.3191        | 1234.1632        | 23 |
| 5  | <b>603.3137</b>  | 302.1605        | 586.2871         | 293.6472         |                  |                  | N    | 2372.2456        | 1186.6264        | 2355.2191        | 1178.1132        | 2354.2351        | 1177.6212        | 22 |
| 6  | <b>740.3726</b>  | 370.6899        | 723.3461         | 362.1767         |                  |                  | H    | 2257.2187        | <b>1129.1130</b> | 2240.1921        | <b>1120.5997</b> | 2239.2081        | <b>1120.1077</b> | 21 |
| 7  | <b>827.4046</b>  | 414.2060        | 810.3781         | 405.6927         | 809.3941         | 405.2007         | S    | 2120.1598        | <b>1060.5835</b> | 2103.1332        | 1052.0702        | 2102.1492        | 1051.5782        | 20 |
| 8  | 956.4472         | 478.7272        | 939.4207         | 470.2140         | 938.4367         | <b>469.7220</b>  | E    | 2033.1277        | <b>1017.0675</b> | 2016.1012        | 1008.5542        | 2015.1172        | 1008.0622        | 19 |
| 9  | 1070.4901        | 535.7487        | <b>1053.4636</b> | <b>527.2354</b>  | 1052.4796        | <b>526.7434</b>  | N    | <b>1904.0851</b> | 952.5462         | 1887.0586        | 944.0329         | 1886.0746        | <b>943.5409</b>  | 18 |
| 10 | 1141.5273        | 571.2673        | <b>1124.5007</b> | 562.7540         | 1123.5167        | 562.2620         | A    | <b>1790.0422</b> | <b>895.5247</b>  | <b>1773.0157</b> | 887.0115         | <b>1772.0316</b> | 886.5195         | 17 |
| 11 | <b>1242.5749</b> | 621.7911        | <b>1225.5484</b> | <b>613.2778</b>  | 1224.5644        | <b>612.7858</b>  | T    | <b>1719.0051</b> | 860.0062         | 1701.9786        | 851.4929         | 1700.9945        | 851.0009         | 16 |
| 12 | 1313.6121        | 657.3097        | <b>1296.5855</b> | 648.7964         | 1295.6015        | 648.3044         | A    | 1617.9574        | 809.4823         | 1600.9309        | 800.9691         | 1599.9469        | 800.4771         | 15 |
| 13 | <b>1441.7070</b> | <b>721.3571</b> | 1424.6805        | 712.8439         | 1423.6965        | <b>712.3519</b>  | K    | <b>1546.9203</b> | 773.9638         | 1529.8938        | 765.4505         | 1528.9097        | 764.9585         | 14 |
| 14 | <b>1556.7340</b> | <b>778.8706</b> | <b>1539.7074</b> | <b>770.3573</b>  | 1538.7234        | <b>769.8653</b>  | D    | <b>1418.8253</b> | <b>709.9163</b>  | 1401.7988        | 701.4030         | <b>1400.8148</b> | 700.9110         | 13 |
| 15 | <b>1669.8180</b> | <b>835.4127</b> | <b>1652.7915</b> | <b>826.8994</b>  | 1651.8075        | 826.4074         | I    | <b>1303.7984</b> | <b>652.4028</b>  | 1286.7719        | 643.8896         | 1285.7878        | 643.3976         | 12 |
| 16 | 1740.8551        | <b>870.9312</b> | 1723.8286        | <b>862.4179</b>  | 1722.8446        | 861.9259         | A    | <b>1190.7143</b> | <b>595.8608</b>  | 1173.6878        | 587.3475         | 1172.7038        | 586.8555         | 11 |
| 17 | <b>1837.9079</b> | <b>919.4576</b> | <b>1820.8814</b> | <b>910.9443</b>  | 1819.8973        | 910.4523         | P    | <b>1119.6772</b> | <b>560.3422</b>  | 1102.6507        | 551.8290         | 1101.6667        | 551.3370         | 10 |
| 18 | <b>1938.9556</b> | 969.9814        | 1921.9290        | 961.4682         | <b>1920.9450</b> | 960.9761         | T    | <b>1022.6245</b> | 511.8159         | <b>1005.5979</b> | 503.3026         | <b>1004.6139</b> | 502.8106         | 9  |
| 19 | 2052.0396        | 1026.5235       | 2035.0131        | <b>1018.0102</b> | 2034.0291        | <b>1017.5182</b> | L    | 921.5768         | 461.2920         | 904.5502         | <b>452.7788</b>  | 903.5662         | <b>452.2867</b>  | 8  |
| 20 | 2153.0873        | 1077.0473       | 2136.0608        | 1068.5340        | 2135.0768        | 1068.0420        | T    | 808.4927         | 404.7500         | 791.4662         | 396.2367         | 790.4822         | 395.7447         | 7  |
| 21 | 2266.1714        | 1133.5893       | 2249.1448        | <b>1125.0761</b> | 2248.1608        | <b>1124.5840</b> | L    | <b>707.4450</b>  | <b>354.2262</b>  | 690.4185         | 345.7129         |                  |                  | 6  |
| 22 | 2429.2347        | 1215.1210       | 2412.2082        | 1206.6077        | 2411.2242        | 1206.1157        | Y    | <b>594.3610</b>  | <b>297.6841</b>  | 577.3344         | 289.1709         |                  |                  | 5  |
| 23 | 2528.3031        | 1264.6552       | 2511.2766        | <b>1256.1419</b> | 2510.2926        | 1255.6499        | V    | <b>431.2976</b>  | 216.1525         | 414.2711         | 207.6392         |                  |                  | 4  |

|    |           |           |           |           |           |           |   |          |          |          |          |  |  |   |
|----|-----------|-----------|-----------|-----------|-----------|-----------|---|----------|----------|----------|----------|--|--|---|
| 24 | 2585.3246 | 1293.1659 | 2568.2980 | 1284.6527 | 2567.3140 | 1284.1607 | G | 332.2292 | 166.6183 | 315.2027 | 158.1050 |  |  | 3 |
| 25 | 2713.4196 | 1357.2134 | 2696.3930 | 1348.7001 | 2695.4090 | 1348.2081 | K | 275.2078 | 138.1075 | 258.1812 | 129.5942 |  |  | 2 |
| 26 |           |           |           |           |           |           | K | 147.1128 | 74.0600  | 130.0863 | 65.5468  |  |  | 1 |

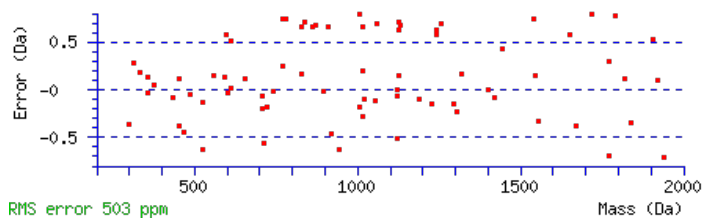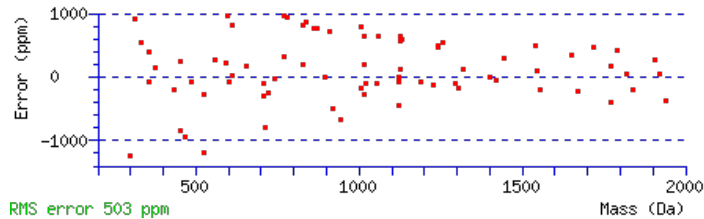

NCBI BLAST search of [NLFLNHSENATAKDIAPTLTLYVGKK](#)  
 (Parameters: blastp, nr protein database, expect=20000, no filter, PAM30)  
 Other BLAST [web gateways](#)

All matches to this query

| Score | Mr(calc)  | Delta  | Sequence                                   | Site Analysis        |
|-------|-----------|--------|--------------------------------------------|----------------------|
| 53.5  | 2858.5178 | 1.0015 | <a href="#">NLFLNHSENATAKDIAPTLTLYVGKK</a> | Deamidated N5 43.60% |
| 52.8  | 2858.5178 | 1.0015 | <a href="#">NLFLNHSENATAKDIAPTLTLYVGKK</a> | Deamidated N1 37.19% |
| 50.0  | 2858.5178 | 1.0015 | <a href="#">NLFLNHSENATAKDIAPTLTLYVGKK</a> | Deamidated N9 19.21% |

Mascot: <http://www.matrixscience.com/>

# MATRIX SCIENCE Mascot Search Results

## Peptide View

MS/MS Fragmentation of **NLFLNHSENATAK**

Found in **H3BS21** in **con\_Xuniprot\_HUMAN3**, H3BS21\_HUMAN Haptoglobin (Fragment) OS=Homo sapiens GN=HP PE=2 SV=1

Match to Query 4962: 1459.697248 from(730.855900,2+) intensity(4583.1934) rtinseconds(724) scans(1157) index(501)

Title: 111019\_Est\_ISCardio\_NMI\_200000g\_G\_7Spectrum906\_scans\_\_1157

Data file C:\\mascot\\20140703\_Tmgf\_1D\\CSV\_UseAnalysis\\MasterCSV\\All\_Glyco\\mgf\\ptm\\UC18ERLIC\_PTM\_35D.mgf

Click mouse within plot area to zoom in by factor of two about that point

Or, to Da

Label all possible matches Label matches used for scoring

Show Y-axis

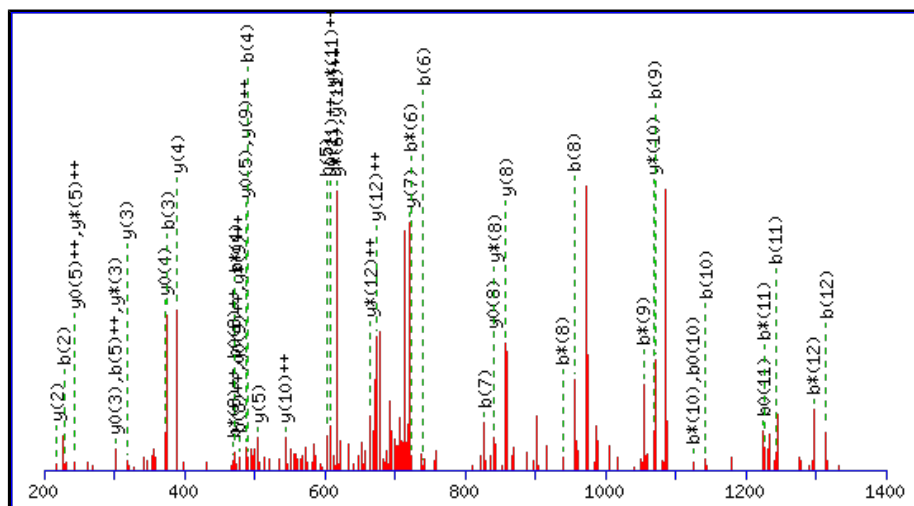

Monoisotopic mass of neutral peptide Mr(calc): 1459.6943

Fixed modifications: Carbamidomethyl (C) (apply to specified residues or termini only)

Variable modifications:

N1 : Deamidated (NQ)

N9 : Deamidated (NQ)

Ions Score: 51 Expect: 0.0013

Matches : 49/128 fragment ions using 105 most intense peaks ([help](#))

| #  | b                | b <sup>++</sup> | b <sup>*</sup>   | b <sup>*++</sup> | b <sup>0</sup>   | b <sup>0++</sup> | Seq. | y               | y <sup>++</sup> | y <sup>*</sup>   | y <sup>*++</sup> | y <sup>0</sup>  | y <sup>0++</sup> | #  |
|----|------------------|-----------------|------------------|------------------|------------------|------------------|------|-----------------|-----------------|------------------|------------------|-----------------|------------------|----|
| 1  | 116.0342         | 58.5207         | 99.0077          | 50.0075          |                  |                  | N    |                 |                 |                  |                  |                 |                  | 13 |
| 2  | <b>229.1183</b>  | 115.0628        | 212.0917         | 106.5495         |                  |                  | L    | 1345.6747       | <b>673.3410</b> | 1328.6481        | <b>664.8277</b>  | 1327.6641       | 664.3357         | 12 |
| 3  | <b>376.1867</b>  | 188.5970        | 359.1601         | 180.0837         |                  |                  | F    | 1232.5906       | <b>616.7989</b> | 1215.5640        | <b>608.2857</b>  | 1214.5800       | <b>607.7937</b>  | 11 |
| 4  | <b>489.2708</b>  | 245.1390        | <b>472.2442</b>  | 236.6257         |                  |                  | L    | 1085.5222       | <b>543.2647</b> | <b>1068.4956</b> | 534.7515         | 1067.5116       | 534.2594         | 10 |
| 5  | <b>603.3137</b>  | <b>302.1605</b> | 586.2871         | 293.6472         |                  |                  | N    | 972.4381        | <b>486.7227</b> | 955.4116         | <b>478.2094</b>  | 954.4275        | <b>477.7174</b>  | 9  |
| 6  | <b>740.3726</b>  | 370.6899        | <b>723.3461</b>  | 362.1767         |                  |                  | H    | <b>858.3952</b> | 429.7012        | <b>841.3686</b>  | 421.1880         | <b>840.3846</b> | 420.6959         | 8  |
| 7  | <b>827.4046</b>  | 414.2060        | 810.3781         | 405.6927         | 809.3941         | 405.2007         | S    | <b>721.3363</b> | 361.1718        | 704.3097         | 352.6585         | 703.3257        | 352.1665         | 7  |
| 8  | <b>956.4472</b>  | <b>478.7272</b> | <b>939.4207</b>  | <b>470.2140</b>  | 938.4367         | <b>469.7220</b>  | E    | 634.3042        | 317.6558        | <b>617.2777</b>  | 309.1425         | 616.2937        | 308.6505         | 6  |
| 9  | <b>1071.4742</b> | 536.2407        | <b>1054.4476</b> | 527.7274         | 1053.4636        | 527.2354         | N    | <b>505.2617</b> | 253.1345        | 488.2351         | <b>244.6212</b>  | <b>487.2511</b> | <b>244.1292</b>  | 5  |
| 10 | <b>1142.5113</b> | 571.7593        | <b>1125.4847</b> | 563.2460         | <b>1124.5007</b> | 562.7540         | A    | <b>390.2347</b> | 195.6210        | 373.2082         | 187.1077         | <b>372.2241</b> | 186.6157         | 4  |
| 11 | <b>1243.5590</b> | 622.2831        | <b>1226.5324</b> | 613.7698         | <b>1225.5484</b> | 613.2778         | T    | <b>319.1976</b> | 160.1024        | <b>302.1710</b>  | 151.5892         | <b>301.1870</b> | 151.0972         | 3  |
| 12 | <b>1314.5961</b> | 657.8017        | <b>1297.5695</b> | 649.2884         | 1296.5855        | 648.7964         | A    | <b>218.1499</b> | 109.5786        | 201.1234         | 101.0653         |                 |                  | 2  |
| 13 |                  |                 |                  |                  |                  |                  | K    | 147.1128        | 74.0600         | 130.0863         | 65.5468          |                 |                  | 1  |

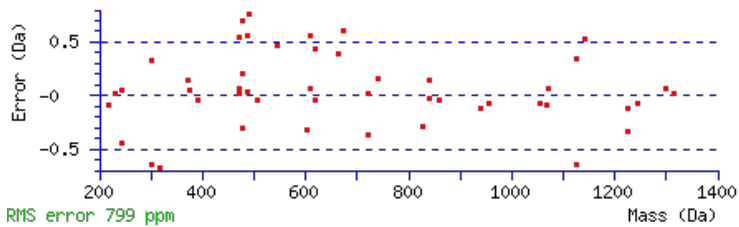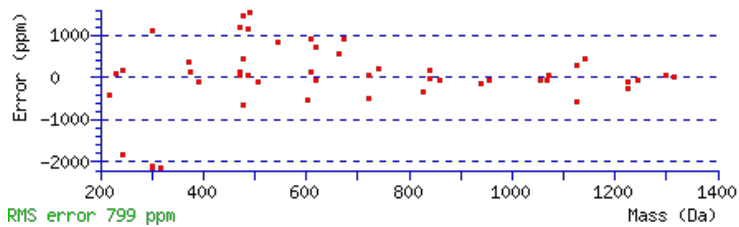

NCBI **BLAST** search of [NLFLNHSENATAK](#)

(Parameters: blastp, nr protein database, expect=20000, no filter, PAM30)

Other BLAST [web gateways](#)

**All matches to this query**

| Score | Mr(calc)  | Delta   | Sequence                      | Site Analysis            |
|-------|-----------|---------|-------------------------------|--------------------------|
| 51.1  | 1459.6943 | 0.0030  | <a href="#">NLFLNHSENATAK</a> | Deamidated N1, N9 64.45% |
| 48.4  | 1459.6943 | 0.0030  | <a href="#">NLFLNHSENATAK</a> | Deamidated N5, N9 35.25% |
| 27.8  | 1459.6943 | 0.0030  | <a href="#">NLFLNHSENATAK</a> | Deamidated N1, N5 0.30%  |
| 14.9  | 1459.7042 | -0.0069 | <a href="#">INIQNKDIEAGDK</a> |                          |
| 13.5  | 1459.6929 | 0.0043  | <a href="#">LDENQQQLVQIK</a>  |                          |
| 12.1  | 1459.7042 | -0.0069 | <a href="#">EDLEKPNETQKK</a>  |                          |
| 12.0  | 1459.6903 | 0.0070  | <a href="#">QVDANVNTNDKDK</a> |                          |
| 11.7  | 1459.6903 | 0.0070  | <a href="#">VRTDSNNENSVPK</a> |                          |
| 11.7  | 1459.6903 | 0.0070  | <a href="#">VRTDSNNENSVPK</a> |                          |
| 11.0  | 1459.6977 | -0.0004 | <a href="#">NCTEELDLNPKK</a>  |                          |

Mascot: <http://www.matrixscience.com/>

# MASCOT SCIENCE Mascot Search Results

## Peptide View

MS/MS Fragmentation of **NLFLNHSENATAKDIAPTLTLYVGK**

Found in **H3BS21** in **con\_Xuniprot\_HUMAN3**, H3BS21\_HUMAN Haptoglobin (Fragment) OS=Homo sapiens GN=HP PE=2 SV=1

Match to Query 25452: 2731.414962 from(911.478930,3+) intensity(21250.0000) rtinseconds(1974) scans(4933) index(12750)

Title: 111019\_Est\_ISCardio\_NMI\_YS\_G\_9Spectrum4315\_scans\_\_4933

Data file C:\mascot\20140703\_Tmgf\_1D\CSV\_UseAnalysis\MasterCSV\All\_Glyco\mgf\ptm\UC18ERLIC\_PTM\_35D.mgf

Click mouse within plot area to zoom in by factor of two about that point

Or, to Da

Label all possible matches Label matches used for scoring

Show Y-axis

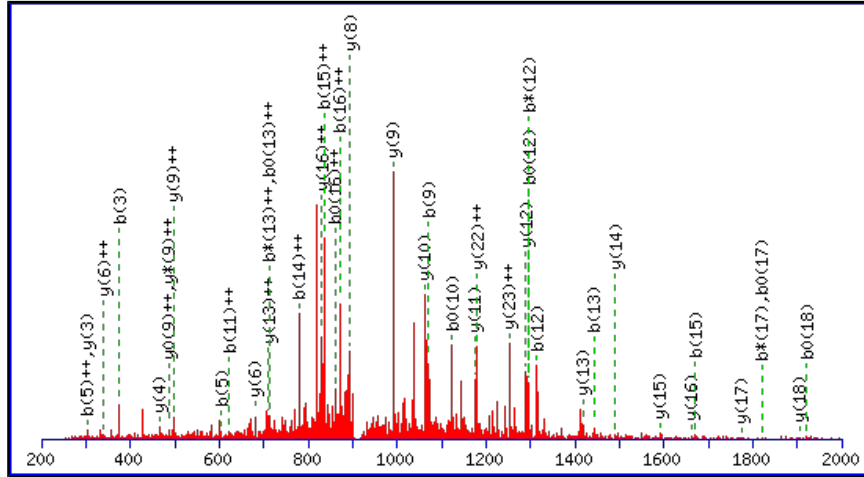

Monoisotopic mass of neutral peptide Mr(calc): 2731.4068

Fixed modifications: Carbamidomethyl (C) (apply to specified residues or termini only)

Variable modifications:

N1 : Deamidated (NQ)

N5 : Deamidated (NQ)

Ions Score: 50 Expect: 0.0023

Matches : 42/266 fragment ions using 105 most intense peaks ([help](#))

| #  | b                | b <sup>++</sup> | b <sup>*</sup>   | b <sup>*++</sup> | b <sup>0</sup>   | b <sup>0++</sup> | Seq. | y                | y <sup>++</sup>  | y <sup>*</sup> | y <sup>*++</sup> | y <sup>0</sup> | y <sup>0++</sup> | #  |
|----|------------------|-----------------|------------------|------------------|------------------|------------------|------|------------------|------------------|----------------|------------------|----------------|------------------|----|
| 1  | 116.0342         | 58.5207         | 99.0077          | 50.0075          |                  |                  | N    |                  |                  |                |                  |                |                  | 25 |
| 2  | 229.1183         | 115.0628        | 212.0917         | 106.5495         |                  |                  | L    | 2617.3872        | 1309.1972        | 2600.3606      | 1300.6840        | 2599.3766      | 1300.1920        | 24 |
| 3  | <b>376.1867</b>  | 188.5970        | 359.1601         | 180.0837         |                  |                  | F    | 2504.3031        | <b>1252.6552</b> | 2487.2766      | 1244.1419        | 2486.2926      | 1243.6499        | 23 |
| 4  | 489.2708         | 245.1390        | 472.2442         | 236.6257         |                  |                  | L    | 2357.2347        | <b>1179.1210</b> | 2340.2082      | 1170.6077        | 2339.2242      | 1170.1157        | 22 |
| 5  | <b>604.2977</b>  | <b>302.6525</b> | 587.2712         | 294.1392         |                  |                  | N    | 2244.1507        | 1122.5790        | 2227.1241      | 1114.0657        | 2226.1401      | 1113.5737        | 21 |
| 6  | 741.3566         | 371.1819        | 724.3301         | 362.6687         |                  |                  | H    | 2129.1237        | 1065.0655        | 2112.0972      | 1056.5522        | 2111.1131      | 1056.0602        | 20 |
| 7  | 828.3886         | 414.6980        | 811.3621         | 406.1847         | 810.3781         | 405.6927         | S    | 1992.0648        | 996.5360         | 1975.0383      | 988.0228         | 1974.0542      | 987.5308         | 19 |
| 8  | 957.4312         | 479.2193        | 940.4047         | 470.7060         | 939.4207         | 470.2140         | E    | <b>1905.0328</b> | 953.0200         | 1888.0062      | 944.5067         | 1887.0222      | 944.0147         | 18 |
| 9  | <b>1071.4742</b> | 536.2407        | 1054.4476        | 527.7274         | 1053.4636        | 527.2354         | N    | <b>1775.9902</b> | 888.4987         | 1758.9636      | 879.9855         | 1757.9796      | 879.4934         | 17 |
| 10 | 1142.5113        | 571.7593        | 1125.4847        | 563.2460         | <b>1124.5007</b> | 562.7540         | A    | <b>1661.9473</b> | <b>831.4773</b>  | 1644.9207      | 822.9640         | 1643.9367      | 822.4720         | 16 |
| 11 | 1243.5590        | <b>622.2831</b> | 1226.5324        | 613.7698         | 1225.5484        | 613.2778         | T    | <b>1590.9101</b> | 795.9587         | 1573.8836      | 787.4454         | 1572.8996      | 786.9534         | 15 |
| 12 | <b>1314.5961</b> | 657.8017        | <b>1297.5695</b> | 649.2884         | <b>1296.5855</b> | 648.7964         | A    | <b>1489.8625</b> | 745.4349         | 1472.8359      | 736.9216         | 1471.8519      | 736.4296         | 14 |
| 13 | <b>1442.6910</b> | 721.8492        | 1425.6645        | <b>713.3359</b>  | 1424.6805        | <b>712.8439</b>  | K    | <b>1418.8253</b> | <b>709.9163</b>  | 1401.7988      | 701.4030         | 1400.8148      | 700.9110         | 13 |
| 14 | 1557.7180        | <b>779.3626</b> | 1540.6914        | 770.8494         | 1539.7074        | 770.3573         | D    | <b>1290.7304</b> | 645.8688         | 1273.7038      | 637.3556         | 1272.7198      | 636.8635         | 12 |
| 15 | <b>1670.8020</b> | <b>835.9047</b> | 1653.7755        | 827.3914         | 1652.7915        | 826.8994         | I    | <b>1175.7034</b> | 588.3554         | 1158.6769      | 579.8421         | 1157.6929      | 579.3501         | 11 |
| 16 | 1741.8392        | <b>871.4232</b> | 1724.8126        | 862.9099         | 1723.8286        | <b>862.4179</b>  | A    | <b>1062.6194</b> | 531.8133         | 1045.5928      | 523.3001         | 1044.6088      | 522.8080         | 10 |
| 17 | 1838.8919        | 919.9496        | <b>1821.8654</b> | 911.4363         | <b>1820.8814</b> | 910.9443         | P    | <b>991.5823</b>  | <b>496.2948</b>  | 974.5557       | <b>487.7815</b>  | 973.5717       | <b>487.2895</b>  | 9  |
| 18 | 1939.9396        | 970.4734        | 1922.9130        | 961.9602         | <b>1921.9290</b> | 961.4682         | T    | <b>894.5295</b>  | 447.7684         | 877.5029       | 439.2551         | 876.5189       | 438.7631         | 8  |
| 19 | 2053.0237        | 1027.0155       | 2035.9971        | 1018.5022        | 2035.0131        | 1018.0102        | L    | 793.4818         | 397.2445         | 776.4553       | 388.7313         | 775.4713       | 388.2393         | 7  |
| 20 | 2154.0713        | 1077.5393       | 2137.0448        | 1069.0260        | 2136.0608        | 1068.5340        | T    | <b>680.3978</b>  | <b>340.7025</b>  | 663.3712       | 332.1892         | 662.3872       | 331.6972         | 6  |
| 21 | 2267.1554        | 1134.0813       | 2250.1289        | 1125.5681        | 2249.1448        | 1125.0761        | L    | 579.3501         | 290.1787         | 562.3235       | 281.6654         |                |                  | 5  |
| 22 | 2430.2187        | 1215.6130       | 2413.1922        | 1207.0997        | 2412.2082        | 1206.6077        | Y    | <b>466.2660</b>  | 233.6366         | 449.2395       | 225.1234         |                |                  | 4  |

|    |           |           |           |           |           |           |   |          |          |          |          |  |  |   |
|----|-----------|-----------|-----------|-----------|-----------|-----------|---|----------|----------|----------|----------|--|--|---|
| 23 | 2529.2871 | 1265.1472 | 2512.2606 | 1256.6339 | 2511.2766 | 1256.1419 | V | 303.2027 | 152.1050 | 286.1761 | 143.5917 |  |  | 3 |
| 24 | 2586.3086 | 1293.6579 | 2569.2821 | 1285.1447 | 2568.2980 | 1284.6527 | G | 204.1343 | 102.5708 | 187.1077 | 94.0575  |  |  | 2 |
| 25 |           |           |           |           |           |           | K | 147.1128 | 74.0600  | 130.0863 | 65.5468  |  |  | 1 |

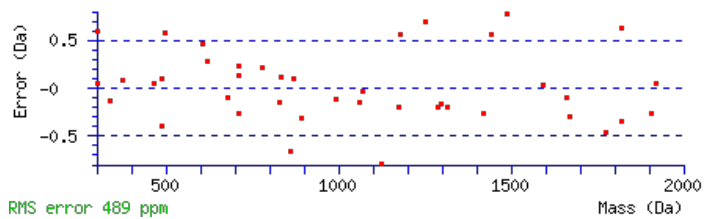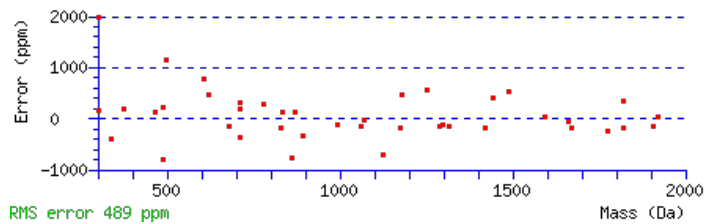

NCBI BLAST search of [NLFLNHSENATAKDIAPTLTLYVGK](#)  
 (Parameters: blastp, nr protein database, expect=20000, no filter, PAM30)  
 Other BLAST [web gateways](#)

All matches to this query

| Score | Mr(calc)  | Delta  | Sequence                                    | Site Analysis            |
|-------|-----------|--------|---------------------------------------------|--------------------------|
| 49.7  | 2731.4068 | 0.0081 | <a href="#">NLFLNHSENATAKDIAPTLTLYVGK</a>   | Deamidated N1, N5 81.69% |
| 46.6  | 2730.4228 | 0.9922 | <a href="#">NLFLNHSENATAKDIAPTLTLYVGK</a>   |                          |
| 44.2  | 2730.4228 | 0.9922 | <a href="#">NLFLNHSENATAKDIAPTLTLYVGK</a>   |                          |
| 40.9  | 2731.4068 | 0.0081 | <a href="#">NLFLNHSENATAKDIAPTLTLYVGK</a>   | Deamidated N5, N9 10.79% |
| 39.4  | 2731.4068 | 0.0081 | <a href="#">NLFLNHSENATAKDIAPTLTLYVGK</a>   | Deamidated N1, N9 7.52%  |
| 32.2  | 2730.4228 | 0.9922 | <a href="#">NLFLNHSENATAKDIAPTLTLYVGK</a>   |                          |
| 1.2   | 2730.4044 | 1.0105 | <a href="#">AATATMPASVVGQRPTIAMVTAINSQK</a> |                          |
| 0.5   | 2730.4117 | 1.0032 | <a href="#">LAALAKMNIMDRAATPNESMNLK</a>     |                          |
| 0.5   | 2730.4163 | 0.9987 | <a href="#">LFEVMHQRRSNIAFLPTNGEK</a>       |                          |

Mascot: <http://www.matrixscience.com/>

# MASCOT SCIENCE Mascot Search Results

## Peptide View

MS/MS Fragmentation of **MVSHHNLTTGATLINEQWLLTTAK**

Found in **J3QR68** in **con\_Xuniprot\_HUMAN3**, J3QR68\_HUMAN Haptoglobin (Fragment) OS=Homo sapiens GN=HP PE=3 SV=1

Match to Query 25269: 2696.357652 from(899.793160,3+) intensity(11738.8682) rtinseconds(3099) scans(8319) index(9898)

Title: 111019\_Est\_ISCardio\_NMI\_YS\_G\_5Spectrum7249\_scans\_\_8319

Data file C:\mascot\20140703\_Tmgf\_1D\CSV\_UseAnalysis\MasterCSV\All\_Glyco\mgf\ptm\UC18ERLIC\_PTM\_35D.mgf

Click mouse within plot area to zoom in by factor of two about that point

Or, to Da

Label all possible matches Label matches used for scoring

Show Y-axis

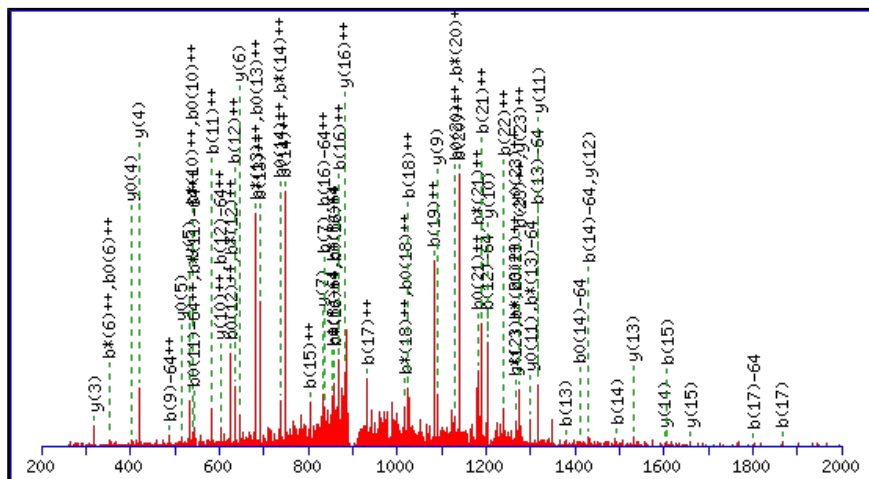

Monoisotopic mass of neutral peptide Mr(calc): 2696.3479

Fixed modifications: Carbamidomethyl (C) (apply to specified residues or termini only)

Variable modifications:

M1 : Oxidation (M), with neutral losses 0.0000(shown in table), 63.9983

N6 : Deamidated (NQ)

Q17 : Deamidated (NQ)

Ions Score: 50 Expect: 0.0029

Matches : 72/382 fragment ions using 121 most intense peaks ([help](#))

| #  | b         | b <sup>++</sup> | b <sup>*</sup> | b <sup>*++</sup> | b <sup>0</sup> | b <sup>0++</sup> | Seq. | y         | y <sup>++</sup> | y <sup>*</sup> | y <sup>*++</sup> | y <sup>0</sup> | y <sup>0++</sup> | #  |
|----|-----------|-----------------|----------------|------------------|----------------|------------------|------|-----------|-----------------|----------------|------------------|----------------|------------------|----|
| 1  | 148.0427  | 74.5250         |                |                  |                |                  | M    |           |                 |                |                  |                |                  | 24 |
| 2  | 247.1111  | 124.0592        |                |                  |                |                  | V    | 2550.3198 | 1275.6636       | 2533.2933      | 1267.1503        | 2532.3093      | 1266.6583        | 23 |
| 3  | 334.1431  | 167.5752        |                |                  | 316.1326       | 158.5699         | S    | 2451.2514 | 1226.1294       | 2434.2249      | 1217.6161        | 2433.2409      | 1217.1241        | 22 |
| 4  | 471.2020  | 236.1047        |                |                  | 453.1915       | 227.0994         | H    | 2364.2194 | 1182.6133       | 2347.1929      | 1174.1001        | 2346.2088      | 1173.6081        | 21 |
| 5  | 608.2609  | 304.6341        |                |                  | 590.2504       | 295.6288         | H    | 2227.1605 | 1114.0839       | 2210.1339      | 1105.5706        | 2209.1499      | 1105.0786        | 20 |
| 6  | 723.2879  | 362.1476        | 706.2613       | 353.6343         | 705.2773       | 353.1423         | N    | 2090.1016 | 1045.5544       | 2073.0750      | 1037.0412        | 2072.0910      | 1036.5491        | 19 |
| 7  | 836.3719  | 418.6896        | 819.3454       | 410.1763         | 818.3614       | 409.6843         | L    | 1975.0746 | 988.0410        | 1958.0481      | 979.5277         | 1957.0641      | 979.0357         | 18 |
| 8  | 937.4196  | 469.2135        | 920.3931       | 460.7002         | 919.4091       | 460.2082         | T    | 1861.9906 | 931.4989        | 1844.9640      | 922.9857         | 1843.9800      | 922.4936         | 17 |
| 9  | 1038.4673 | 519.7373        | 1021.4408      | 511.2240         | 1020.4567      | 510.7320         | T    | 1760.9429 | 880.9751        | 1743.9163      | 872.4618         | 1742.9323      | 871.9698         | 16 |
| 10 | 1095.4888 | 548.2480        | 1078.4622      | 539.7347         | 1077.4782      | 539.2427         | G    | 1659.8952 | 830.4512        | 1642.8687      | 821.9380         | 1641.8847      | 821.4460         | 15 |
| 11 | 1166.5259 | 583.7666        | 1149.4993      | 575.2533         | 1148.5153      | 574.7613         | A    | 1602.8738 | 801.9405        | 1585.8472      | 793.4272         | 1584.8632      | 792.9352         | 14 |
| 12 | 1267.5736 | 634.2904        | 1250.5470      | 625.7771         | 1249.5630      | 625.2851         | T    | 1531.8366 | 766.4220        | 1514.8101      | 757.9087         | 1513.8261      | 757.4167         | 13 |
| 13 | 1380.6576 | 690.8325        | 1363.6311      | 682.3192         | 1362.6471      | 681.8272         | L    | 1430.7890 | 715.8981        | 1413.7624      | 707.3848         | 1412.7784      | 706.8928         | 12 |
| 14 | 1493.7417 | 747.3745        | 1476.7151      | 738.8612         | 1475.7311      | 738.3692         | I    | 1317.7049 | 659.3561        | 1300.6783      | 650.8428         | 1299.6943      | 650.3508         | 11 |
| 15 | 1607.7846 | 804.3959        | 1590.7581      | 795.8827         | 1589.7741      | 795.3907         | N    | 1204.6208 | 602.8141        | 1187.5943      | 594.3008         | 1186.6103      | 593.8088         | 10 |
| 16 | 1736.8272 | 868.9172        | 1719.8007      | 860.4040         | 1718.8166      | 859.9120         | E    | 1090.5779 | 545.7926        | 1073.5514      | 537.2793         | 1072.5673      | 536.7873         | 9  |
| 17 | 1865.8698 | 933.4385        | 1848.8433      | 924.9253         | 1847.8592      | 924.4333         | Q    | 961.5353  | 481.2713        | 944.5088       | 472.7580         | 943.5247       | 472.2660         | 8  |
| 18 | 2051.9491 | 1026.4782       | 2034.9226      | 1017.9649        | 2033.9386      | 1017.4729        | W    | 832.4927  | 416.7500        | 815.4662       | 408.2367         | 814.4822       | 407.7447         | 7  |
| 19 | 2165.0332 | 1083.0202       | 2148.0066      | 1074.5070        | 2147.0226      | 1074.0149        | L    | 646.4134  | 323.7103        | 629.3869       | 315.1971         | 628.4028       | 314.7051         | 6  |
| 20 | 2278.1172 | 1139.5623       | 2261.0907      | 1131.0490        | 2260.1067      | 1130.5570        | L    | 533.3293  | 267.1683        | 516.3028       | 258.6550         | 515.3188       | 258.1630         | 5  |
| 21 | 2379.1649 | 1190.0861       | 2362.1384      | 1181.5728        | 2361.1544      | 1181.0808        | T    | 420.2453  | 210.6263        | 403.2187       | 202.1130         | 402.2347       | 201.6210         | 4  |
| 22 | 2480.2126 | 1240.6099       | 2463.1861      | 1232.0967        | 2462.2020      | 1231.6047        | T    | 319.1976  | 160.1024        | 302.1710       | 151.5892         | 301.1870       | 151.0972         | 3  |



|    |           |                  |           |                  |           |                  |   |          |          |          |          |  |  |   |
|----|-----------|------------------|-----------|------------------|-----------|------------------|---|----------|----------|----------|----------|--|--|---|
| 23 | 2551.2497 | <b>1276.1285</b> | 2534.2232 | <b>1267.6152</b> | 2533.2392 | <b>1267.1232</b> | A | 218.1499 | 109.5786 | 201.1234 | 101.0653 |  |  | 2 |
| 24 |           |                  |           |                  |           |                  | K | 147.1128 | 74.0600  | 130.0863 | 65.5468  |  |  | 1 |

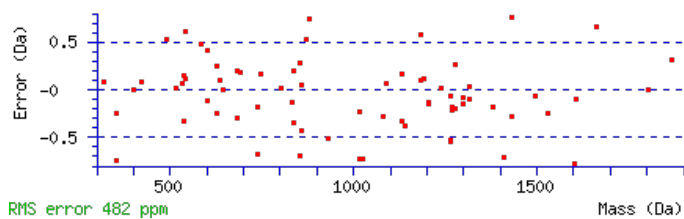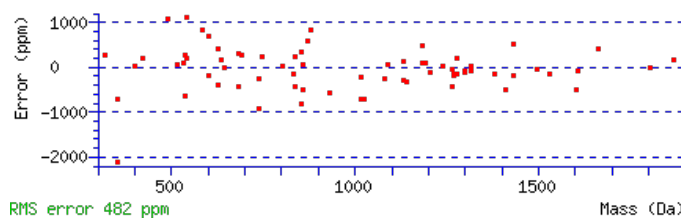

NCBI BLAST search of [MVSHHNLTGATLINEQWLLTTAK](#)  
 (Parameters: blastp, nr protein database, expect=20000, no filter, PAM30)  
 Other BLAST [web gateways](#)

All matches to this query

| Score | Mr(calc)  | Delta  | Sequence                                 | Site Analysis             |
|-------|-----------|--------|------------------------------------------|---------------------------|
| 49.5  | 2696.3479 | 0.0097 | <a href="#">MVSHHNLTGATLINEQWLLTTAK</a>  | Deamidated N6, Q17 53.32% |
| 48.8  | 2696.3479 | 0.0097 | <a href="#">MVSHHNLTGATLINEQWLLTTAK</a>  | Deamidated N6, N15 44.86% |
| 46.1  | 2695.3639 | 0.9937 | <a href="#">MVSHHNLTGATLINEQWLLTTAK</a>  |                           |
| 35.5  | 2695.3639 | 0.9937 | <a href="#">MVSHHNLTGATLINEQWLLTTAK</a>  |                           |
| 34.9  | 2696.3479 | 0.0097 | <a href="#">MVSHHNLTGATLINEQWLLTTAK</a>  | Deamidated N15, Q17 1.82% |
| 34.8  | 2695.3639 | 0.9937 | <a href="#">MVSHHNLTGATLINEQWLLTTAK</a>  |                           |
| 15.3  | 2695.3606 | 0.9971 | <a href="#">SDDVNLAIYPDLLETQPRPGVAHR</a> |                           |
| 8.6   | 2695.3680 | 0.9897 | <a href="#">VGSLIFHTIGQLLPQMQAFHSPK</a>  |                           |
| 7.3   | 2696.3545 | 0.0032 | <a href="#">FDVVDGEGNRLIDKSEISISLEDK</a> |                           |
| 7.3   | 2695.3680 | 0.9897 | <a href="#">VGSLIFHTIGQLLPQMQAFHSPK</a>  |                           |

Mascot: <http://www.matrixscience.com/>

# MATRIX SCIENCE Mascot Search Results

## Peptide View

MS/MS Fragmentation of **MVSHHNLTTGATLINEQWLLTTAK**

Found in **J3QR68** in **con\_Xuniprot\_HUMAN3**, J3QR68\_HUMAN Haptoglobin (Fragment) OS=Homo sapiens GN=HP PE=3 SV=1

Match to Query 25267: 2696.355522 from(899.792450,3+) intensity(12110.0156) rtinseconds(3018) scans(8193) index(24244)

Title: 111019\_Est\_MI\_YS\_G\_05Spectrum7135\_scans\_\_8193

Data file C:\mascot\20140703\_Tmgf\_1D\CSV\_UseAnalysis\MasterCSV\All\_Glyco\mgf\ptm\UC18ERLIC\_PTM\_35D.mgf

Click mouse within plot area to zoom in by factor of two about that point

Or, to Da

Label all possible matches Label matches used for scoring

Show Y-axis

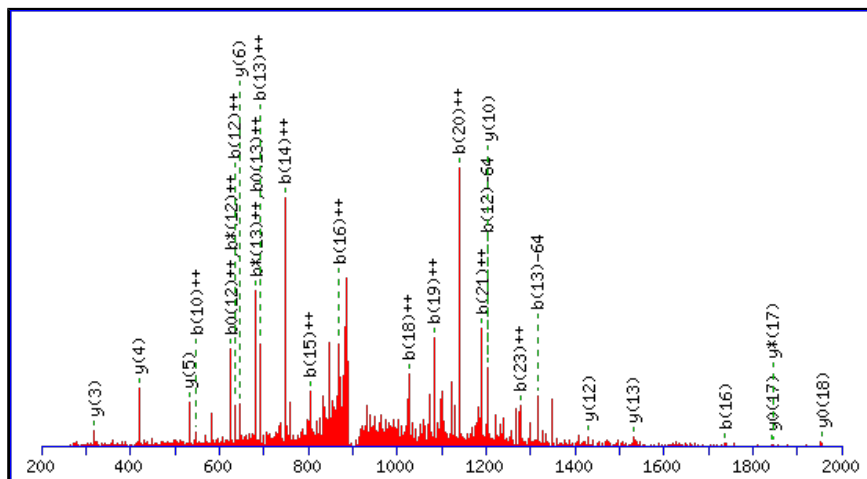

Monoisotopic mass of neutral peptide Mr(calc): 2696.3479

Fixed modifications: Carbamidomethyl (C) (apply to specified residues or termini only)

Variable modifications:

M1 : Oxidation (M), with neutral losses 0.0000(shown in table), 63.9983

N6 : Deamidated (NQ)

N15 : Deamidated (NQ)

Ions Score: 47 Expect: 0.0048

Matches : 28/382 fragment ions using 51 most intense peaks ([help](#))

| #  | b         | b <sup>++</sup> | b <sup>*</sup> | b <sup>*++</sup> | b <sup>0</sup> | b <sup>0++</sup> | Seq. | y         | y <sup>++</sup> | y <sup>*</sup> | y <sup>*++</sup> | y <sup>0</sup> | y <sup>0++</sup> | #  |
|----|-----------|-----------------|----------------|------------------|----------------|------------------|------|-----------|-----------------|----------------|------------------|----------------|------------------|----|
| 1  | 148.0427  | 74.5250         |                |                  |                |                  | M    |           |                 |                |                  |                |                  | 24 |
| 2  | 247.1111  | 124.0592        |                |                  |                |                  | V    | 2550.3198 | 1275.6636       | 2533.2933      | 1267.1503        | 2532.3093      | 1266.6583        | 23 |
| 3  | 334.1431  | 167.5752        |                |                  | 316.1326       | 158.5699         | S    | 2451.2514 | 1226.1294       | 2434.2249      | 1217.6161        | 2433.2409      | 1217.1241        | 22 |
| 4  | 471.2020  | 236.1047        |                |                  | 453.1915       | 227.0994         | H    | 2364.2194 | 1182.6133       | 2347.1929      | 1174.1001        | 2346.2088      | 1173.6081        | 21 |
| 5  | 608.2609  | 304.6341        |                |                  | 590.2504       | 295.6288         | H    | 2227.1605 | 1114.0839       | 2210.1339      | 1105.5706        | 2209.1499      | 1105.0786        | 20 |
| 6  | 723.2879  | 362.1476        | 706.2613       | 353.6343         | 705.2773       | 353.1423         | N    | 2090.1016 | 1045.5544       | 2073.0750      | 1037.0412        | 2072.0910      | 1036.5491        | 19 |
| 7  | 836.3719  | 418.6896        | 819.3454       | 410.1763         | 818.3614       | 409.6843         | L    | 1975.0746 | 988.0410        | 1958.0481      | 979.5277         | 1957.0641      | 979.0357         | 18 |
| 8  | 937.4196  | 469.2135        | 920.3931       | 460.7002         | 919.4091       | 460.2082         | T    | 1861.9906 | 931.4989        | 1844.9640      | 922.9857         | 1843.9800      | 922.4936         | 17 |
| 9  | 1038.4673 | 519.7373        | 1021.4408      | 511.2240         | 1020.4567      | 510.7320         | T    | 1760.9429 | 880.9751        | 1743.9163      | 872.4618         | 1742.9323      | 871.9698         | 16 |
| 10 | 1095.4888 | 548.2480        | 1078.4622      | 539.7347         | 1077.4782      | 539.2427         | G    | 1659.8952 | 830.4512        | 1642.8687      | 821.9380         | 1641.8847      | 821.4460         | 15 |
| 11 | 1166.5259 | 583.7666        | 1149.4993      | 575.2533         | 1148.5153      | 574.7613         | A    | 1602.8738 | 801.9405        | 1585.8472      | 793.4272         | 1584.8632      | 792.9352         | 14 |
| 12 | 1267.5736 | 634.2904        | 1250.5470      | 625.7771         | 1249.5630      | 625.2851         | T    | 1531.8366 | 766.4220        | 1514.8101      | 757.9087         | 1513.8261      | 757.4167         | 13 |
| 13 | 1380.6576 | 690.8325        | 1363.6311      | 682.3192         | 1362.6471      | 681.8272         | L    | 1430.7890 | 715.8981        | 1413.7624      | 707.3848         | 1412.7784      | 706.8928         | 12 |
| 14 | 1493.7417 | 747.3745        | 1476.7151      | 738.8612         | 1475.7311      | 738.3692         | I    | 1317.7049 | 659.3561        | 1300.6783      | 650.8428         | 1299.6943      | 650.3508         | 11 |
| 15 | 1608.7686 | 804.8880        | 1591.7421      | 796.3747         | 1590.7581      | 795.8827         | N    | 1204.6208 | 602.8141        | 1187.5943      | 594.3008         | 1186.6103      | 593.8088         | 10 |
| 16 | 1737.8112 | 869.4093        | 1720.7847      | 860.8960         | 1719.8007      | 860.4040         | E    | 1089.5939 | 545.3006        | 1072.5673      | 536.7873         | 1071.5833      | 536.2953         | 9  |
| 17 | 1865.8698 | 933.4385        | 1848.8433      | 924.9253         | 1847.8592      | 924.4333         | Q    | 960.5513  | 480.7793        | 943.5247       | 472.2660         | 942.5407       | 471.7740         | 8  |
| 18 | 2051.9491 | 1026.4782       | 2034.9226      | 1017.9649        | 2033.9386      | 1017.4729        | W    | 832.4927  | 416.7500        | 815.4662       | 408.2367         | 814.4822       | 407.7447         | 7  |
| 19 | 2165.0332 | 1083.0202       | 2148.0066      | 1074.5070        | 2147.0226      | 1074.0149        | L    | 646.4134  | 323.7103        | 629.3869       | 315.1971         | 628.4028       | 314.7051         | 6  |
| 20 | 2278.1172 | 1139.5623       | 2261.0907      | 1131.0490        | 2260.1067      | 1130.5570        | L    | 533.3293  | 267.1683        | 516.3028       | 258.6550         | 515.3188       | 258.1630         | 5  |
| 21 | 2379.1649 | 1190.0861       | 2362.1384      | 1181.5728        | 2361.1544      | 1181.0808        | T    | 420.2453  | 210.6263        | 403.2187       | 202.1130         | 402.2347       | 201.6210         | 4  |
| 22 | 2480.2126 | 1240.6099       | 2463.1861      | 1232.0967        | 2462.2020      | 1231.6047        | T    | 319.1976  | 160.1024        | 302.1710       | 151.5892         | 301.1870       | 151.0972         | 3  |

|    |           |                  |           |           |           |           |   |          |          |          |          |  |  |   |
|----|-----------|------------------|-----------|-----------|-----------|-----------|---|----------|----------|----------|----------|--|--|---|
| 23 | 2551.2497 | <b>1276.1285</b> | 2534.2232 | 1267.6152 | 2533.2392 | 1267.1232 | A | 218.1499 | 109.5786 | 201.1234 | 101.0653 |  |  | 2 |
| 24 |           |                  |           |           |           |           | K | 147.1128 | 74.0600  | 130.0863 | 65.5468  |  |  | 1 |

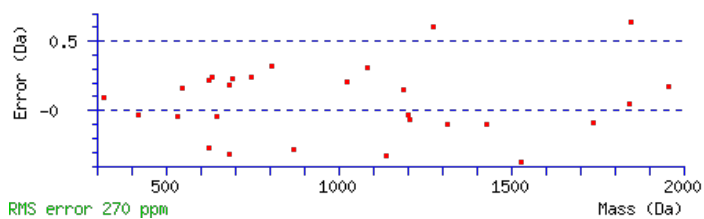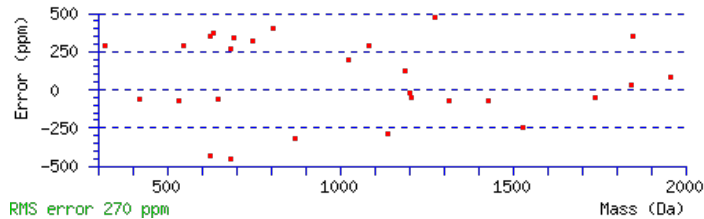

NCBI BLAST search of [MVSHHNLTGATLINEQWLLTTAK](#)  
 (Parameters: blastp, nr protein database, expect=20000, no filter, PAM30)  
 Other BLAST [web gateways](#)

All matches to this query

| Score | Mr(calc)  | Delta  | Sequence                                 | Site Analysis             |
|-------|-----------|--------|------------------------------------------|---------------------------|
| 47.4  | 2696.3479 | 0.0076 | <a href="#">MVSHHNLTGATLINEQWLLTTAK</a>  | Deamidated N6, N15 87.44% |
| 37.9  | 2696.3479 | 0.0076 | <a href="#">MVSHHNLTGATLINEQWLLTTAK</a>  | Deamidated N6, Q17 9.95%  |
| 32.1  | 2696.3479 | 0.0076 | <a href="#">MVSHHNLTGATLINEQWLLTTAK</a>  | Deamidated N15, Q17 2.62% |
| 30.4  | 2695.3639 | 0.9916 | <a href="#">MVSHHNLTGATLINEQWLLTTAK</a>  |                           |
| 27.7  | 2695.3639 | 0.9916 | <a href="#">MVSHHNLTGATLINEQWLLTTAK</a>  |                           |
| 27.7  | 2695.3639 | 0.9916 | <a href="#">MVSHHNLTGATLINEQWLLTTAK</a>  |                           |
| 13.8  | 2695.3606 | 0.9950 | <a href="#">SDDVNLAIYPDLLFTQPRPGVAHR</a> |                           |
| 6.9   | 2694.3361 | 2.0194 | <a href="#">VYASDSSQTRGFNPVSVRPLDKNR</a> |                           |
| 6.1   | 2694.3356 | 2.0199 | <a href="#">EMAINDCSKAIQLNPSYIRAILR</a>  |                           |
| 5.0   | 2695.3387 | 1.0168 | <a href="#">GLMIYTLDRNLNLANHLQDQAK</a>   |                           |

Mascot: <http://www.matrixscience.com/>

# MATRIX SCIENCE Mascot Search Results

## Peptide View

MS/MS Fragmentation of **GSFPWQAKMVSHHNLTTGATLINEQWLLTTAKNLFNLHSENATAK**

Found in **J3QR68** in **con\_Xuniprot\_HUMAN3**, J3QR68\_HUMAN Haptoglobin (Fragment) OS=Homo sapiens GN=HP PE=3 SV=1

Match to Query 29002: 5039.522620 from(1008.911800,5+) intensity(0.0000) rtinseconds(2553) scans(6701) index(24867)

Title: 111019\_Est\_MI\_YS\_G\_06Spectrum5844\_scans\_\_6701

Data file C:\mascot\20140703\_Tmgf\_1D\CSV\_UseAnalysis\MasterCSV\All\_Glyco\mgf\ptm\UC18ERLIC\_PTM\_35D.mgf

Click mouse within plot area to zoom in by factor of two about that point

Or, to Da

Label all possible matches Label matches used for scoring

Show Y-axis

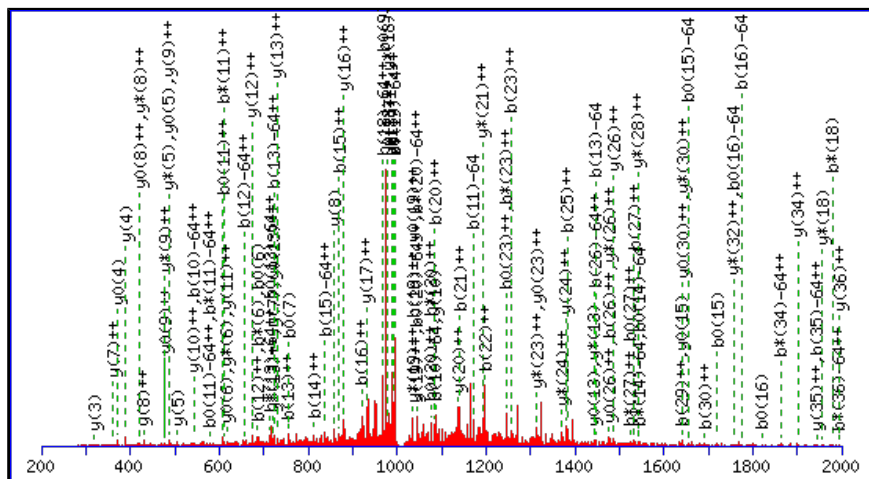

Monoisotopic mass of neutral peptide Mr(calc): 5037.5083

Fixed modifications: Carbamidomethyl (C) (apply to specified residues or termini only)

Variable modifications:

Q6 : Deamidated (NQ)

M9 : Oxidation (M), with neutral losses 0.0000(shown in table), 63.9983

N41 : Deamidated (NQ)

Ions Score: 47 Expect: 0.0024

Matches : 107/776 fragment ions using 173 most intense peaks ([help](#))

| #  | b         | b <sup>++</sup> | b <sup>*</sup> | b <sup>*++</sup> | b <sup>0</sup> | b <sup>0++</sup> | Seq. | y         | y <sup>++</sup> | y <sup>*</sup> | y <sup>*++</sup> | y <sup>0</sup> | y <sup>0++</sup> | #  |
|----|-----------|-----------------|----------------|------------------|----------------|------------------|------|-----------|-----------------|----------------|------------------|----------------|------------------|----|
| 1  | 58.0287   | 29.5180         |                |                  |                |                  | G    |           |                 |                |                  |                |                  | 45 |
| 2  | 145.0608  | 73.0340         |                |                  | 127.0502       | 64.0287          | S    | 4981.4941 | 2491.2507       | 4964.4676      | 2482.7374        | 4963.4836      | 2482.2454        | 44 |
| 3  | 292.1292  | 146.5682        |                |                  | 274.1186       | 137.5629         | F    | 4894.4621 | 2447.7347       | 4877.4356      | 2439.2214        | 4876.4516      | 2438.7294        | 43 |
| 4  | 389.1819  | 195.0946        |                |                  | 371.1714       | 186.0893         | P    | 4747.3937 | 2374.2005       | 4730.3672      | 2365.6872        | 4729.3831      | 2365.1952        | 42 |
| 5  | 575.2613  | 288.1343        |                |                  | 557.2507       | 279.1290         | W    | 4650.3409 | 2325.6741       | 4633.3144      | 2317.1608        | 4632.3304      | 2316.6688        | 41 |
| 6  | 704.3039  | 352.6556        | 687.2773       | 344.1423         | 686.2933       | 343.6503         | Q    | 4464.2616 | 2232.6345       | 4447.2351      | 2224.1212        | 4446.2511      | 2223.6292        | 40 |
| 7  | 775.3410  | 388.1741        | 758.3144       | 379.6608         | 757.3304       | 379.1688         | A    | 4335.2190 | 2168.1132       | 4318.1925      | 2159.5999        | 4317.2085      | 2159.1079        | 39 |
| 8  | 903.4359  | 452.2216        | 886.4094       | 443.7083         | 885.4254       | 443.2163         | K    | 4264.1819 | 2132.5946       | 4247.1554      | 2124.0813        | 4246.1714      | 2123.5893        | 38 |
| 9  | 1050.4713 | 525.7393        | 1033.4448      | 517.2260         | 1032.4608      | 516.7340         | M    | 4136.0870 | 2068.5471       | 4119.0604      | 2060.0338        | 4118.0764      | 2059.5418        | 37 |
| 10 | 1149.5397 | 575.2735        | 1132.5132      | 566.7602         | 1131.5292      | 566.2682         | V    | 3989.0516 | 1995.0294       | 3972.0250      | 1986.5161        | 3971.0410      | 1986.0241        | 36 |
| 11 | 1236.5718 | 618.7895        | 1219.5452      | 610.2762         | 1218.5612      | 609.7842         | S    | 3889.9831 | 1945.4952       | 3872.9566      | 1936.9819        | 3871.9726      | 1936.4899        | 35 |
| 12 | 1373.6307 | 687.3190        | 1356.6041      | 678.8057         | 1355.6201      | 678.3137         | H    | 3802.9511 | 1901.9792       | 3785.9246      | 1893.4659        | 3784.9406      | 1892.9739        | 34 |
| 13 | 1510.6896 | 755.8484        | 1493.6630      | 747.3352         | 1492.6790      | 746.8432         | H    | 3665.8922 | 1833.4497       | 3648.8657      | 1824.9365        | 3647.8816      | 1824.4445        | 33 |
| 14 | 1624.7325 | 812.8699        | 1607.7060      | 804.3566         | 1606.7220      | 803.8646         | N    | 3528.8333 | 1764.9203       | 3511.8067      | 1756.4070        | 3510.8227      | 1755.9150        | 32 |
| 15 | 1737.8166 | 869.4119        | 1720.7900      | 860.8987         | 1719.8060      | 860.4066         | L    | 3414.7904 | 1707.8988       | 3397.7638      | 1699.3855        | 3396.7798      | 1698.8935        | 31 |
| 16 | 1838.8643 | 919.9358        | 1821.8377      | 911.4225         | 1820.8537      | 910.9305         | T    | 3301.7063 | 1651.3568       | 3284.6798      | 1642.8435        | 3283.6957      | 1642.3515        | 30 |
| 17 | 1939.9119 | 970.4596        | 1922.8854      | 961.9463         | 1921.9014      | 961.4543         | T    | 3200.6586 | 1600.8329       | 3183.6321      | 1592.3197        | 3182.6481      | 1591.8277        | 29 |
| 18 | 1996.9334 | 998.9703        | 1979.9069      | 990.4571         | 1978.9228      | 989.9651         | G    | 3099.6109 | 1550.3091       | 3082.5844      | 1541.7958        | 3081.6004      | 1541.3038        | 28 |
| 19 | 2067.9705 | 1034.4889       | 2050.9440      | 1025.9756        | 2049.9600      | 1025.4836        | A    | 3042.5895 | 1521.7984       | 3025.5629      | 1513.2851        | 3024.5789      | 1512.7931        | 27 |
| 20 | 2169.0182 | 1085.0127       | 2151.9917      | 1076.4995        | 2151.0076      | 1076.0075        | T    | 2971.5524 | 1486.2798       | 2954.5258      | 1477.7665        | 2953.5418      | 1477.2745        | 26 |
| 21 | 2282.1023 | 1141.5548       | 2265.0757      | 1133.0415        | 2264.0917      | 1132.5495        | L    | 2870.5047 | 1435.7560       | 2853.4781      | 1427.2427        | 2852.4941      | 1426.7507        | 25 |
| 22 | 2395.1863 | 1198.0968       | 2378.1598      | 1189.5835        | 2377.1758      | 1189.0915        | I    | 2757.4206 | 1379.2139       | 2740.3941      | 1370.7007        | 2739.4101      | 1370.2087        | 24 |

|    |           |                  |           |                  |           |                  |          |                  |                  |                  |                  |                  |                  |           |
|----|-----------|------------------|-----------|------------------|-----------|------------------|----------|------------------|------------------|------------------|------------------|------------------|------------------|-----------|
| 23 | 2509.2293 | <b>1255.1183</b> | 2492.2027 | <b>1246.6050</b> | 2491.2187 | <b>1246.1130</b> | <b>N</b> | 2644.3366        | 1322.6719        | 2627.3100        | <b>1314.1586</b> | 2626.3260        | <b>1313.6666</b> | <b>23</b> |
| 24 | 2638.2719 | 1319.6396        | 2621.2453 | 1311.1263        | 2620.2613 | 1310.6343        | <b>E</b> | 2530.2936        | 1265.6505        | 2513.2671        | 1257.1372        | 2512.2831        | 1256.6452        | <b>22</b> |
| 25 | 2766.3304 | <b>1383.6689</b> | 2749.3039 | 1375.1556        | 2748.3199 | 1374.6636        | <b>Q</b> | 2401.2510        | 1201.1292        | 2384.2245        | <b>1192.6159</b> | 2383.2405        | 1192.1239        | <b>21</b> |
| 26 | 2952.4097 | <b>1476.7085</b> | 2935.3832 | 1468.1952        | 2934.3992 | 1467.7032        | <b>W</b> | 2273.1925        | <b>1137.0999</b> | 2256.1659        | 1128.5866        | 2255.1819        | 1128.0946        | <b>20</b> |
| 27 | 3065.4938 | <b>1533.2505</b> | 3048.4673 | <b>1524.7373</b> | 3047.4832 | <b>1524.2453</b> | <b>L</b> | 2087.1131        | <b>1044.0602</b> | 2070.0866        | <b>1035.5469</b> | 2069.1026        | <b>1035.0549</b> | <b>19</b> |
| 28 | 3178.5779 | 1589.7926        | 3161.5513 | 1581.2793        | 3160.5673 | 1580.7873        | <b>L</b> | 1974.0291        | <b>987.5182</b>  | <b>1957.0025</b> | <b>979.0049</b>  | 1956.0185        | <b>978.5129</b>  | <b>18</b> |
| 29 | 3279.6255 | <b>1640.3164</b> | 3262.5990 | 1631.8031        | 3261.6150 | 1631.3111        | <b>T</b> | 1860.9450        | <b>930.9761</b>  | 1843.9185        | 922.4629         | 1842.9345        | 921.9709         | <b>17</b> |
| 30 | 3380.6732 | <b>1690.8403</b> | 3363.6467 | 1682.3270        | 3362.6627 | 1681.8350        | <b>T</b> | 1759.8973        | <b>880.4523</b>  | 1742.8708        | 871.9390         | 1741.8868        | 871.4470         | <b>16</b> |
| 31 | 3451.7103 | 1726.3588        | 3434.6838 | 1717.8455        | 3433.6998 | 1717.3535        | <b>A</b> | 1658.8497        | 829.9285         | 1641.8231        | 821.4152         | <b>1640.8391</b> | 820.9232         | <b>15</b> |
| 32 | 3579.8053 | 1790.4063        | 3562.7788 | 1781.8930        | 3561.7947 | 1781.4010        | <b>K</b> | 1587.8125        | 794.4099         | 1570.7860        | 785.8966         | 1569.8020        | 785.4046         | <b>14</b> |
| 33 | 3693.8482 | 1847.4278        | 3676.8217 | 1838.9145        | 3675.8377 | 1838.4225        | <b>N</b> | 1459.7176        | <b>730.3624</b>  | <b>1442.6910</b> | <b>721.8492</b>  | <b>1441.7070</b> | <b>721.3571</b>  | <b>13</b> |
| 34 | 3806.9323 | 1903.9698        | 3789.9057 | 1895.4565        | 3788.9217 | 1894.9645        | <b>L</b> | 1345.6747        | <b>673.3410</b>  | 1328.6481        | 664.8277         | 1327.6641        | 664.3357         | <b>12</b> |
| 35 | 3954.0007 | 1977.5040        | 3936.9742 | 1968.9907        | 3935.9901 | 1968.4987        | <b>F</b> | 1232.5906        | <b>616.7989</b>  | 1215.5640        | 608.2857         | 1214.5800        | 607.7937         | <b>11</b> |
| 36 | 4067.0848 | 2034.0460        | 4050.0582 | 2025.5328        | 4049.0742 | 2025.0407        | <b>L</b> | <b>1085.5222</b> | <b>543.2647</b>  | 1068.4956        | 534.7515         | 1067.5116        | 534.2594         | <b>10</b> |
| 37 | 4181.1277 | 2091.0675        | 4164.1012 | 2082.5542        | 4163.1171 | 2082.0622        | <b>N</b> | 972.4381         | <b>486.7227</b>  | 955.4116         | <b>478.2094</b>  | 954.4275         | <b>477.7174</b>  | <b>9</b>  |
| 38 | 4318.1866 | 2159.5969        | 4301.1601 | 2151.0837        | 4300.1760 | 2150.5917        | <b>H</b> | <b>858.3952</b>  | <b>429.7012</b>  | 841.3686         | <b>421.1880</b>  | 840.3846         | <b>420.6959</b>  | <b>8</b>  |
| 39 | 4405.2186 | 2203.1130        | 4388.1921 | 2194.5997        | 4387.2081 | 2194.1077        | <b>S</b> | <b>721.3363</b>  | <b>361.1718</b>  | 704.3097         | 352.6585         | 703.3257         | 352.1665         | <b>7</b>  |
| 40 | 4534.2612 | 2267.6343        | 4517.2347 | 2259.1210        | 4516.2507 | 2258.6290        | <b>E</b> | 634.3042         | 317.6558         | <b>617.2777</b>  | 309.1425         | <b>616.2937</b>  | 308.6505         | <b>6</b>  |
| 41 | 4649.2882 | 2325.1477        | 4632.2616 | 2316.6345        | 4631.2776 | 2316.1424        | <b>N</b> | <b>505.2617</b>  | 253.1345         | <b>488.2351</b>  | 244.6212         | <b>487.2511</b>  | 244.1292         | <b>5</b>  |
| 42 | 4720.3253 | 2360.6663        | 4703.2987 | 2352.1530        | 4702.3147 | 2351.6610        | <b>A</b> | <b>390.2347</b>  | 195.6210         | 373.2082         | 187.1077         | <b>372.2241</b>  | 186.6157         | <b>4</b>  |
| 43 | 4821.3730 | 2411.1901        | 4804.3464 | 2402.6768        | 4803.3624 | 2402.1848        | <b>T</b> | <b>319.1976</b>  | 160.1024         | 302.1710         | 151.5892         | 301.1870         | 151.0972         | <b>3</b>  |
| 44 | 4892.4101 | 2446.7087        | 4875.3835 | 2438.1954        | 4874.3995 | 2437.7034        | <b>A</b> | 218.1499         | 109.5786         | 201.1234         | 101.0653         |                  |                  | <b>2</b>  |
| 45 |           |                  |           |                  |           |                  | <b>K</b> | 147.1128         | 74.0600          | 130.0863         | 65.5468          |                  |                  | <b>1</b>  |

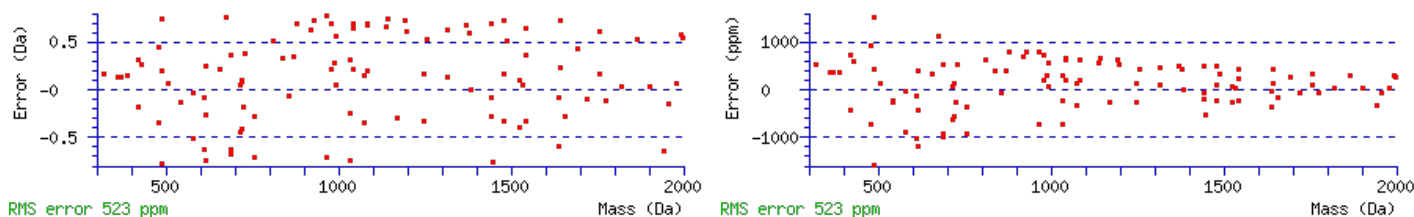

NCBI BLAST search of [GSFPWQAKMVSHHNLTTGATLINEQWLLTTAKNLFNLHSENATAK](#)

(Parameters: blastp, nr protein database, expect=20000, no filter, PAM30)

Other BLAST [web gateways](#)

All matches to this query

| Score | Mr(calc)  | Delta  | Sequence                                                        | Site Analysis             |
|-------|-----------|--------|-----------------------------------------------------------------|---------------------------|
| 47.3  | 5037.5083 | 2.0143 | <a href="#">GSFPWQAKMVSHHNLTTGATLINEQWLLTTAKNLFNLHSENATAK</a>   | Deamidated Q6, N41 89.69% |
| 37.7  | 5037.5083 | 2.0143 | <a href="#">GSFPWQAKMVSHHNLTTGATLINEQWLLTTAKNLFNLHSENATAK</a>   | Deamidated N37, N41 9.86% |
| 20.3  | 5037.5083 | 2.0143 | <a href="#">GSFPWQAKMVSHHNLTTGATLINEQWLLTTAKNLFNLHSENATAK</a>   | Deamidated N33, N37 0.18% |
| 16.0  | 5037.5083 | 2.0143 | <a href="#">GSFPWQAKMVSHHNLTTGATLINEQWLLTTAKNLFNLHSENATAK</a>   | Deamidated Q6, N14 0.07%  |
| 12.2  | 5037.5083 | 2.0143 | <a href="#">GSFPWQAKMVSHHNLTTGATLINEQWLLTTAKNLFNLHSENATAK</a>   | Deamidated Q25, N33 0.03% |
| 12.2  | 5037.5083 | 2.0143 | <a href="#">GSFPWQAKMVSHHNLTTGATLINEQWLLTTAKNLFNLHSENATAK</a>   | Deamidated N14, N23 0.03% |
| 11.6  | 5039.5186 | 0.0041 | <a href="#">NQLAMDLPTEGKVNQIDLSSGAELLKDVANVNGAAVAWHLPTNQHIK</a> |                           |
| 9.4   | 5037.4958 | 2.0268 | <a href="#">LLYGNDAKVLEQPVVVQSVGTDGRVFHFLVFQLNTTDLDCNEGVK</a>   |                           |
| 9.0   | 5037.4958 | 2.0268 | <a href="#">LLYGNDAKVLEQPVVVQSVGTDGRVFHFLVFQLNTTDLDCNEGVK</a>   |                           |
| 9.0   | 5037.4958 | 2.0268 | <a href="#">LLYGNDAKVLEQPVVVQSVGTDGRVFHFLVFQLNTTDLDCNEGVK</a>   |                           |

Mascot: <http://www.matrixscience.com/>

# MATRIX SCIENCE Mascot Search Results

## Peptide View

MS/MS Fragmentation of **NLFLNHSENAKDIAPTLTLYVGKK**

Found in **H3BS21** in **con\_Xuniprot\_HUMAN3**, H3BS21\_HUMAN Haptoglobin (Fragment) OS=Homo sapiens GN=HP PE=2 SV=1

Match to Query 25892: 2859.512082 from(954.177970,3+) intensity(26360.4766) rtinseconds(1735) scans(4113) index(11836)

Title: 111019\_Est\_ISCardio\_NMI\_YS\_G\_8Spectrum3520\_scans\_\_4113

Data file C:\mascot\20140703\_Tmgf\_1D\CSV\_UseAnalysis\MasterCSV\All\_Glyco\mgf\ptm\UC18ERLIC\_PTM\_35D.mgf

Click mouse within plot area to zoom in by factor of two about that point

Or, to Da

Label all possible matches Label matches used for scoring

Show Y-axis

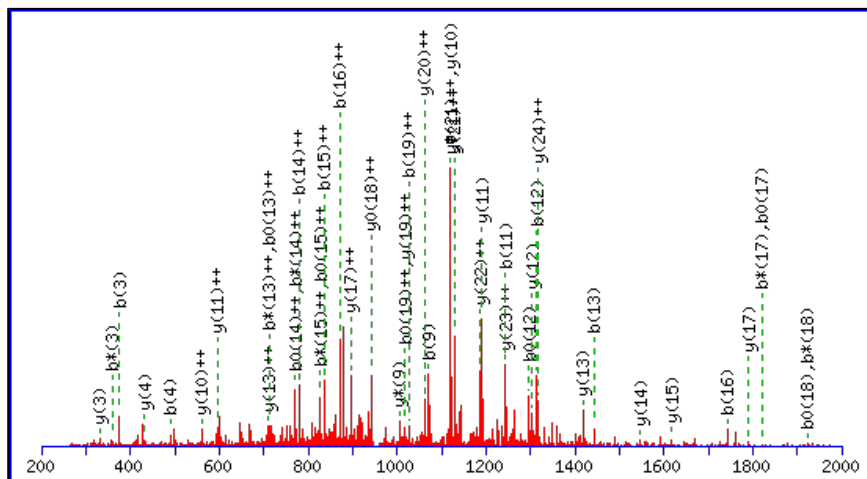

Monoisotopic mass of neutral peptide Mr(calc): 2859.5018

Fixed modifications: Carbamidomethyl (C) (apply to specified residues or termini only)

Variable modifications:

N1 : Deamidated (NQ)

N5 : Deamidated (NQ)

Ions Score: 47 Expect: 0.0027

Matches : 47/276 fragment ions using 86 most intense peaks ([help](#))

| #  | b                | b <sup>++</sup>  | b*               | b <sup>*++</sup> | b <sup>0</sup>   | b <sup>0++</sup> | Seq. | y                | y <sup>++</sup>  | y*               | y <sup>*++</sup> | y <sup>0</sup> | y <sup>0++</sup> | #  |
|----|------------------|------------------|------------------|------------------|------------------|------------------|------|------------------|------------------|------------------|------------------|----------------|------------------|----|
| 1  | 116.0342         | 58.5207          | 99.0077          | 50.0075          |                  |                  | N    |                  |                  |                  |                  |                |                  | 26 |
| 2  | 229.1183         | 115.0628         | 212.0917         | 106.5495         |                  |                  | L    | 2745.4822        | 1373.2447        | 2728.4556        | 1364.7314        | 2727.4716      | 1364.2394        | 25 |
| 3  | <b>376.1867</b>  | 188.5970         | <b>359.1601</b>  | 180.0837         |                  |                  | F    | 2632.3981        | <b>1316.7027</b> | 2615.3715        | 1308.1894        | 2614.3875      | 1307.6974        | 24 |
| 4  | <b>489.2708</b>  | 245.1390         | 472.2442         | 236.6257         |                  |                  | L    | 2485.3297        | <b>1243.1685</b> | 2468.3031        | 1234.6552        | 2467.3191      | 1234.1632        | 23 |
| 5  | 604.2977         | 302.6525         | 587.2712         | 294.1392         |                  |                  | N    | 2372.2456        | <b>1186.6264</b> | 2355.2191        | 1178.1132        | 2354.2351      | 1177.6212        | 22 |
| 6  | 741.3566         | 371.1819         | 724.3301         | 362.6687         |                  |                  | H    | 2257.2187        | <b>1129.1130</b> | 2240.1921        | <b>1120.5997</b> | 2239.2081      | <b>1120.1077</b> | 21 |
| 7  | 828.3886         | 414.6980         | 811.3621         | 406.1847         | 810.3781         | 405.6927         | S    | 2120.1598        | <b>1060.5835</b> | 2103.1332        | 1052.0702        | 2102.1492      | 1051.5782        | 20 |
| 8  | 957.4312         | 479.2193         | 940.4047         | 470.7060         | 939.4207         | 470.2140         | E    | 2033.1277        | <b>1017.0675</b> | 2016.1012        | 1008.5542        | 2015.1172      | 1008.0622        | 19 |
| 9  | <b>1071.4742</b> | 536.2407         | 1054.4476        | 527.7274         | 1053.4636        | 527.2354         | N    | 1904.0851        | 952.5462         | 1887.0586        | 944.0329         | 1886.0746      | <b>943.5409</b>  | 18 |
| 10 | 1142.5113        | 571.7593         | 1125.4847        | 563.2460         | 1124.5007        | 562.7540         | A    | <b>1790.0422</b> | <b>895.5247</b>  | 1773.0157        | 887.0115         | 1772.0316      | 886.5195         | 17 |
| 11 | <b>1243.5590</b> | 622.2831         | 1226.5324        | 613.7698         | 1225.5484        | 613.2778         | T    | 1719.0051        | 860.0062         | 1701.9786        | 851.4929         | 1700.9945      | 851.0009         | 16 |
| 12 | <b>1314.5961</b> | 657.8017         | 1297.5695        | 649.2884         | <b>1296.5855</b> | 648.7964         | A    | <b>1617.9574</b> | 809.4823         | 1600.9309        | 800.9691         | 1599.9469      | 800.4771         | 15 |
| 13 | <b>1442.6910</b> | 721.8492         | 1425.6645        | <b>713.3359</b>  | 1424.6805        | <b>712.8439</b>  | K    | <b>1546.9203</b> | 773.9638         | 1529.8938        | 765.4505         | 1528.9097      | 764.9585         | 14 |
| 14 | 1557.7180        | <b>779.3626</b>  | 1540.6914        | <b>770.8494</b>  | 1539.7074        | <b>770.3573</b>  | D    | <b>1418.8253</b> | <b>709.9163</b>  | 1401.7988        | 701.4030         | 1400.8148      | 700.9110         | 13 |
| 15 | 1670.8020        | <b>835.9047</b>  | 1653.7755        | <b>827.3914</b>  | 1652.7915        | <b>826.8994</b>  | I    | <b>1303.7984</b> | 652.4028         | 1286.7719        | 643.8896         | 1285.7878      | 643.3976         | 12 |
| 16 | <b>1741.8392</b> | <b>871.4232</b>  | 1724.8126        | 862.9099         | 1723.8286        | 862.4179         | A    | <b>1190.7143</b> | <b>595.8608</b>  | 1173.6878        | 587.3475         | 1172.7038      | 586.8555         | 11 |
| 17 | 1838.8919        | 919.9496         | <b>1821.8654</b> | 911.4363         | <b>1820.8814</b> | 910.9443         | P    | <b>1119.6772</b> | <b>560.3422</b>  | 1102.6507        | 551.8290         | 1101.6667      | 551.3370         | 10 |
| 18 | 1939.9396        | 970.4734         | <b>1922.9130</b> | 961.9602         | <b>1921.9290</b> | 961.4682         | T    | 1022.6245        | 511.8159         | <b>1005.5979</b> | 503.3026         | 1004.6139      | 502.8106         | 9  |
| 19 | 2053.0237        | <b>1027.0155</b> | 2035.9971        | 1018.5022        | 2035.0131        | <b>1018.0102</b> | L    | 921.5768         | 461.2920         | 904.5502         | 452.7788         | 903.5662       | 452.2867         | 8  |
| 20 | 2154.0713        | 1077.5393        | 2137.0448        | 1069.0260        | 2136.0608        | 1068.5340        | T    | 808.4927         | 404.7500         | 791.4662         | 396.2367         | 790.4822       | 395.7447         | 7  |
| 21 | 2267.1554        | 1134.0813        | 2250.1289        | 1125.5681        | 2249.1448        | 1125.0761        | L    | 707.4450         | 354.2262         | 690.4185         | 345.7129         |                |                  | 6  |
| 22 | 2430.2187        | 1215.6130        | 2413.1922        | 1207.0997        | 2412.2082        | 1206.6077        | Y    | 594.3610         | 297.6841         | 577.3344         | 289.1709         |                |                  | 5  |



|    |           |           |           |           |           |           |   |          |          |          |          |  |  |   |
|----|-----------|-----------|-----------|-----------|-----------|-----------|---|----------|----------|----------|----------|--|--|---|
| 23 | 2529.2871 | 1265.1472 | 2512.2606 | 1256.6339 | 2511.2766 | 1256.1419 | V | 431.2976 | 216.1525 | 414.2711 | 207.6392 |  |  | 4 |
| 24 | 2586.3086 | 1293.6579 | 2569.2821 | 1285.1447 | 2568.2980 | 1284.6527 | G | 332.2292 | 166.6183 | 315.2027 | 158.1050 |  |  | 3 |
| 25 | 2714.4036 | 1357.7054 | 2697.3770 | 1349.1922 | 2696.3930 | 1348.7001 | K | 275.2078 | 138.1075 | 258.1812 | 129.5942 |  |  | 2 |
| 26 |           |           |           |           |           |           | K | 147.1128 | 74.0600  | 130.0863 | 65.5468  |  |  | 1 |

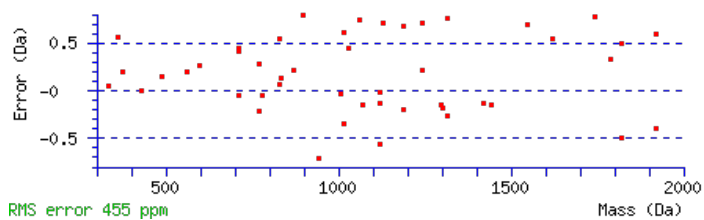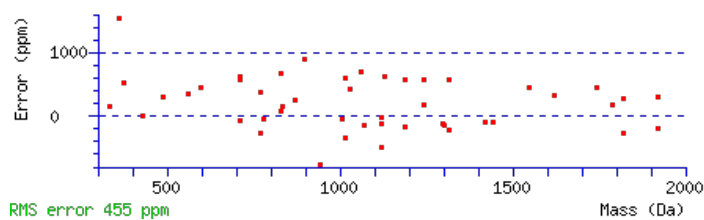

NCBI BLAST search of [NLFLNHSENATAKDIAPTLTLYVGKK](#)  
 (Parameters: blastp, nr protein database, expect=20000, no filter, PAM30)  
 Other BLAST [web gateways](#)

All matches to this query

| Score | Mr(calc)  | Delta   | Sequence                                     | Site Analysis            |
|-------|-----------|---------|----------------------------------------------|--------------------------|
| 46.9  | 2859.5018 | 0.0103  | <a href="#">NLFLNHSENATAKDIAPTLTLYVGKK</a>   | Deamidated N1, N5 35.49% |
| 46.9  | 2859.5018 | 0.0103  | <a href="#">NLFLNHSENATAKDIAPTLTLYVGKK</a>   | Deamidated N1, N9 35.40% |
| 46.0  | 2859.5018 | 0.0103  | <a href="#">NLFLNHSENATAKDIAPTLTLYVGKK</a>   | Deamidated N5, N9 29.11% |
| 35.9  | 2858.5178 | 0.9943  | <a href="#">NLFLNHSENATAKDIAPTLTLYVGKK</a>   |                          |
| 33.6  | 2858.5178 | 0.9943  | <a href="#">NLFLNHSENATAKDIAPTLTLYVGKK</a>   |                          |
| 30.1  | 2858.5178 | 0.9943  | <a href="#">NLFLNHSENATAKDIAPTLTLYVGKK</a>   |                          |
| 3.7   | 2858.5139 | 0.9982  | <a href="#">EELLNFTLVQLVYLQHAMETKIPK</a>     |                          |
| 3.2   | 2859.5243 | -0.0122 | <a href="#">EYLVRVHVPPNIAGTDEPRDITVLR</a>    |                          |
| 1.8   | 2857.5007 | 2.0114  | <a href="#">DAGTIAGLNVMRIINEPTAAAIAYGLDK</a> |                          |
| 1.3   | 2857.4935 | 2.0186  | <a href="#">EELLNFTLVQLVYLQHAMETKIPQ</a>     |                          |

Mascot: <http://www.matrixscience.com/>



# MASCOT SCIENCE Mascot Search Results

## Peptide View

MS/MS Fragmentation of **VVLHPNYSQVDIGLIKLKQK**

Found in **H3BS21** in **con\_Xuniprot\_HUMAN3**, H3BS21\_HUMAN Haptoglobin (Fragment) OS=Homo sapiens GN=HP PE=2 SV=1

Match to Query 15127: 2292.323420 from(459.471960,5+) intensity(25380.3047) rtinseconds(1419) scans(3652) index(4361)

Title: 111019\_Est\_ISCardio\_NMI\_YP\_G\_7Spectrum3104\_scans\_\_3652

Data file C:\mascot\20140703\_Tmgf\_1D\CSV\_UseAnalysis\MasterCSV\All\_Glyco\mgf\ptm\UC18ERLIC\_PTM\_35D.mgf

Click mouse within plot area to zoom in by factor of two about that point

Or, to Da

Label all possible matches Label matches used for scoring

Show Y-axis

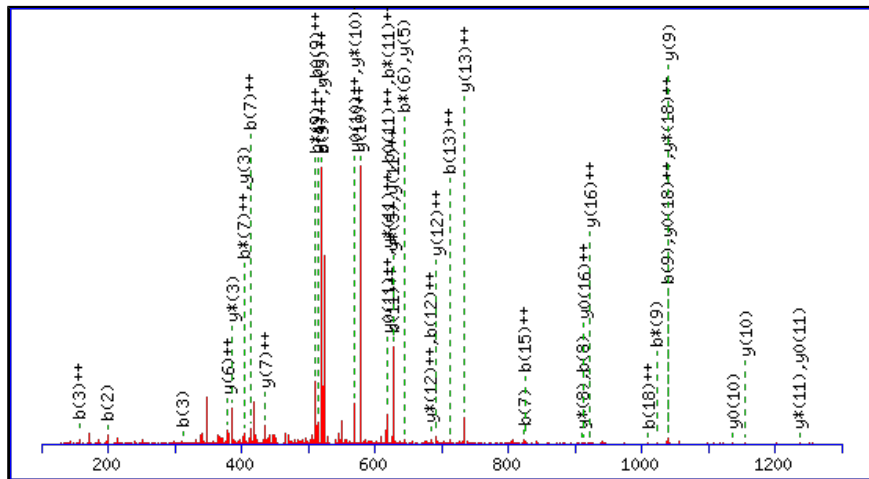

Monoisotopic mass of neutral peptide Mr(calc): 2292.3205

Fixed modifications: Carbamidomethyl (C) (apply to specified residues or termini only)

Variable modifications:

N6 : Deamidated (NQ)

Ions Score: 46 Expect: 0.00029

Matches : 48/186 fragment ions using 67 most intense peaks ([help](#))

| #  | b         | b <sup>++</sup> | b <sup>*</sup> | b <sup>*++</sup> | b <sup>0</sup> | b <sup>0++</sup> | Seq. | y         | y <sup>++</sup> | y <sup>*</sup> | y <sup>*++</sup> | y <sup>0</sup> | y <sup>0++</sup> | #  |
|----|-----------|-----------------|----------------|------------------|----------------|------------------|------|-----------|-----------------|----------------|------------------|----------------|------------------|----|
| 1  | 100.0757  | 50.5415         |                |                  |                |                  | V    |           |                 |                |                  |                |                  | 20 |
| 2  | 199.1441  | 100.0757        |                |                  |                |                  | V    | 2194.2594 | 1097.6333       | 2177.2329      | 1089.1201        | 2176.2489      | 1088.6281        | 19 |
| 3  | 312.2282  | 156.6177        |                |                  |                |                  | L    | 2095.1910 | 1048.0991       | 2078.1645      | 1039.5859        | 2077.1804      | 1039.0939        | 18 |
| 4  | 449.2871  | 225.1472        |                |                  |                |                  | H    | 1982.1069 | 991.5571        | 1965.0804      | 983.0438         | 1964.0964      | 982.5518         | 17 |
| 5  | 546.3398  | 273.6736        |                |                  |                |                  | P    | 1845.0480 | 923.0277        | 1828.0215      | 914.5144         | 1827.0375      | 914.0224         | 16 |
| 6  | 661.3668  | 331.1870        | 644.3402       | 322.6738         |                |                  | N    | 1747.9953 | 874.5013        | 1730.9687      | 865.9880         | 1729.9847      | 865.4960         | 15 |
| 7  | 824.4301  | 412.7187        | 807.4036       | 404.2054         |                |                  | Y    | 1632.9683 | 816.9878        | 1615.9418      | 808.4745         | 1614.9578      | 807.9825         | 14 |
| 8  | 911.4621  | 456.2347        | 894.4356       | 447.7214         | 893.4516       | 447.2294         | S    | 1469.9050 | 735.4561        | 1452.8784      | 726.9429         | 1451.8944      | 726.4509         | 13 |
| 9  | 1039.5207 | 520.2640        | 1022.4942      | 511.7507         | 1021.5102      | 511.2587         | Q    | 1382.8730 | 691.9401        | 1365.8464      | 683.4268         | 1364.8624      | 682.9348         | 12 |
| 10 | 1138.5891 | 569.7982        | 1121.5626      | 561.2849         | 1120.5786      | 560.7929         | V    | 1254.8144 | 627.9108        | 1237.7878      | 619.3976         | 1236.8038      | 618.9055         | 11 |
| 11 | 1253.6161 | 627.3117        | 1236.5895      | 618.7984         | 1235.6055      | 618.3064         | D    | 1155.7460 | 578.3766        | 1138.7194      | 569.8633         | 1137.7354      | 569.3713         | 10 |
| 12 | 1366.7001 | 683.8537        | 1349.6736      | 675.3404         | 1348.6896      | 674.8484         | I    | 1040.7190 | 520.8632        | 1023.6925      | 512.3499         |                |                  | 9  |
| 13 | 1423.7216 | 712.3644        | 1406.6951      | 703.8512         | 1405.7110      | 703.3592         | G    | 927.6350  | 464.3211        | 910.6084       | 455.8078         |                |                  | 8  |
| 14 | 1536.8057 | 768.9065        | 1519.7791      | 760.3932         | 1518.7951      | 759.9012         | L    | 870.6135  | 435.8104        | 853.5870       | 427.2971         |                |                  | 7  |
| 15 | 1649.8897 | 825.4485        | 1632.8632      | 816.9352         | 1631.8792      | 816.4432         | I    | 757.5294  | 379.2684        | 740.5029       | 370.7551         |                |                  | 6  |
| 16 | 1777.9847 | 889.4960        | 1760.9581      | 880.9827         | 1759.9741      | 880.4907         | K    | 644.4454  | 322.7263        | 627.4188       | 314.2130         |                |                  | 5  |
| 17 | 1891.0688 | 946.0380        | 1874.0422      | 937.5247         | 1873.0582      | 937.0327         | L    | 516.3504  | 258.6788        | 499.3239       | 250.1656         |                |                  | 4  |
| 18 | 2019.1637 | 1010.0855       | 2002.1372      | 1001.5722        | 2001.1532      | 1001.0802        | K    | 403.2663  | 202.1368        | 386.2398       | 193.6235         |                |                  | 3  |
| 19 | 2147.2223 | 1074.1148       | 2130.1958      | 1065.6015        | 2129.2117      | 1065.1095        | Q    | 275.1714  | 138.0893        | 258.1448       | 129.5761         |                |                  | 2  |
| 20 |           |                 |                |                  |                |                  | K    | 147.1128  | 74.0600         | 130.0863       | 65.5468          |                |                  | 1  |

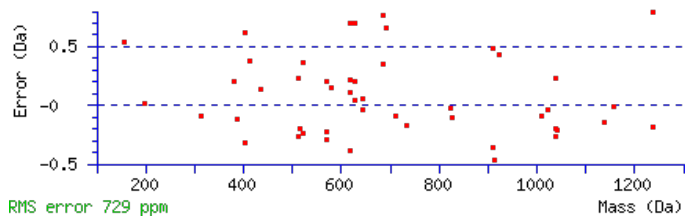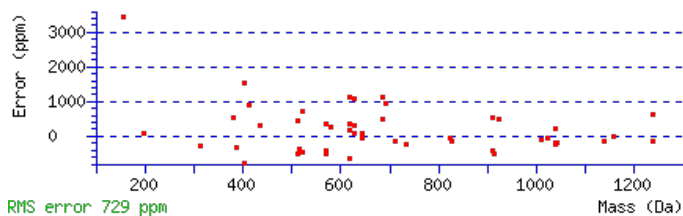

NCBI BLAST search of [VVLHPNYSQVDIGLIKLKQK](#)

(Parameters: blastp, nr protein database, expect=20000, no filter, PAM30)

Other BLAST [web gateways](#)

**All matches to this query**

| Score | Mr(calc)  | Delta  | Sequence                              | Site Analysis        |
|-------|-----------|--------|---------------------------------------|----------------------|
| 46.3  | 2292.3205 | 0.0029 | <a href="#">VVLHPNYSQVDIGLIKLKQK</a>  | Deamidated N6 65.41% |
| 43.2  | 2292.3205 | 0.0029 | <a href="#">VVLHPNYSQVDIGLIKLKQK</a>  | Deamidated Q9 31.53% |
| 33.0  | 2292.3205 | 0.0029 | <a href="#">VVLHPNYSQVDIGLIKLKQK</a>  | Deamidated Q19 3.06% |
| 12.1  | 2291.3213 | 1.0022 | <a href="#">VAITVKQQVAPLQANEVTLLR</a> |                      |
| 12.1  | 2291.3213 | 1.0022 | <a href="#">VAITVKQQVAPLQANEVTLLR</a> |                      |
| 0.8   | 2291.3187 | 1.0047 | <a href="#">VSMEVAAAKGLPVLKYHLLPR</a> |                      |
| 0.5   | 2291.3226 | 1.0008 | <a href="#">RVADQGVWLQRLLELNLLR</a>   |                      |

Mascot: <http://www.matrixscience.com/>

# MASCOT SCIENCE Mascot Search Results

## Peptide View

MS/MS Fragmentation of **MVSHHNLTTGATLINEQWLLTTAKNLFNLHSEENATAK**

Found in **J3QR68** in **con\_Xuniprot\_HUMAN3**, J3QR68\_HUMAN Haptoglobin (Fragment) OS=Homo sapiens GN=HP PE=3 SV=1

Match to Query 28754: 4137.061570 from(828.419590,5+) intensity(163084.5469) rtinseconds(2534) scans(6661) index(22805)

Title: 111019\_Est\_MI\_YS\_G\_03Spectrum5840\_scans\_\_6661

Data file C:\mascot\20140703\_Tmgf\_1D\CSV\_UseAnalysis\MasterCSV\All\_Glyco\mgf\ptm\UC18ERLIC\_PTM\_35D.mgf

Click mouse within plot area to zoom in by factor of two about that point

Or,  to  Da

Label all possible matches  Label matches used for scoring

Show Y-axis

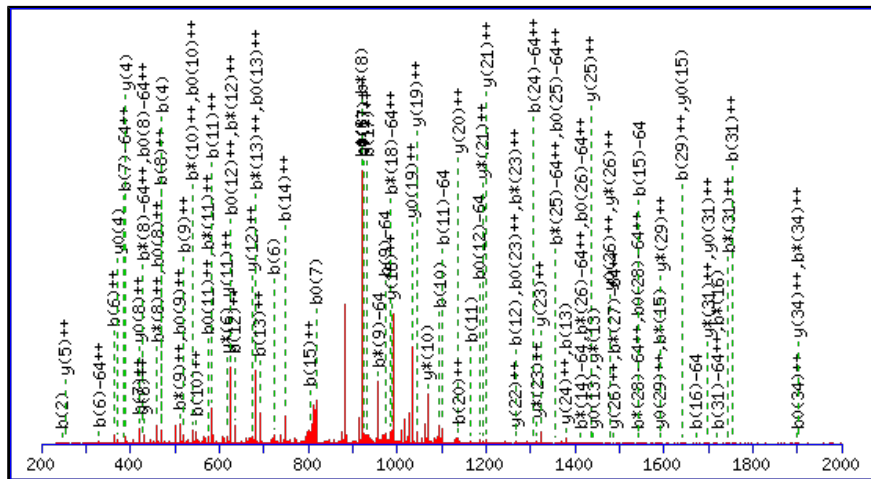

Monoisotopic mass of neutral peptide Mr(calc): 4136.0636

Fixed modifications: Carbamidomethyl (C) (apply to specified residues or termini only)

Variable modifications:

M1 : Oxidation (M), with neutral losses 0.0000 (shown in table), 63.9983

N6 : Deamidated (NQ)

N29 : Deamidated (NQ)

Ions Score: 43 Expect: 0.011

Matches : 97/616 fragment ions using 175 most intense peaks ([help](#))

| #  | b         | b <sup>++</sup> | b <sup>*</sup> | b <sup>*++</sup> | b <sup>0</sup> | b <sup>0++</sup> | Seq. | y         | y <sup>++</sup> | y <sup>*</sup> | y <sup>*++</sup> | y <sup>0</sup> | y <sup>0++</sup> | #  |
|----|-----------|-----------------|----------------|------------------|----------------|------------------|------|-----------|-----------------|----------------|------------------|----------------|------------------|----|
| 1  | 148.0427  | 74.5250         |                |                  |                |                  | M    |           |                 |                |                  |                |                  | 37 |
| 2  | 247.1111  | 124.0592        |                |                  |                |                  | V    | 3990.0356 | 1995.5214       | 3973.0090      | 1987.0081        | 3972.0250      | 1986.5161        | 36 |
| 3  | 334.1431  | 167.5752        |                |                  | 316.1326       | 158.5699         | S    | 3890.9672 | 1945.9872       | 3873.9406      | 1937.4739        | 3872.9566      | 1936.9819        | 35 |
| 4  | 471.2020  | 236.1047        |                |                  | 453.1915       | 227.0994         | H    | 3803.9351 | 1902.4712       | 3786.9086      | 1893.9579        | 3785.9246      | 1893.4659        | 34 |
| 5  | 608.2609  | 304.6341        |                |                  | 590.2504       | 295.6288         | H    | 3666.8762 | 1833.9417       | 3649.8497      | 1825.4285        | 3648.8657      | 1824.9365        | 33 |
| 6  | 723.2879  | 362.1476        | 706.2613       | 353.6343         | 705.2773       | 353.1423         | N    | 3529.8173 | 1765.4123       | 3512.7908      | 1756.8990        | 3511.8067      | 1756.4070        | 32 |
| 7  | 836.3719  | 418.6896        | 819.3454       | 410.1763         | 818.3614       | 409.6843         | L    | 3414.7904 | 1707.8988       | 3397.7638      | 1699.3855        | 3396.7798      | 1698.8935        | 31 |
| 8  | 937.4196  | 469.2135        | 920.3931       | 460.7002         | 919.4091       | 460.2082         | T    | 3301.7063 | 1651.3568       | 3284.6798      | 1642.8435        | 3283.6957      | 1642.3515        | 30 |
| 9  | 1038.4673 | 519.7373        | 1021.4408      | 511.2240         | 1020.4567      | 510.7320         | T    | 3200.6586 | 1600.8329       | 3183.6321      | 1592.3197        | 3182.6481      | 1591.8277        | 29 |
| 10 | 1095.4888 | 548.2480        | 1078.4622      | 539.7347         | 1077.4782      | 539.2427         | G    | 3099.6109 | 1550.3091       | 3082.5844      | 1541.7958        | 3081.6004      | 1541.3038        | 28 |
| 11 | 1166.5259 | 583.7666        | 1149.4993      | 575.2533         | 1148.5153      | 574.7613         | A    | 3042.5895 | 1521.7984       | 3025.5629      | 1513.2851        | 3024.5789      | 1512.7931        | 27 |
| 12 | 1267.5736 | 634.2904        | 1250.5470      | 625.7771         | 1249.5630      | 625.2851         | T    | 2971.5524 | 1486.2798       | 2954.5258      | 1477.7665        | 2953.5418      | 1477.2745        | 26 |
| 13 | 1380.6576 | 690.8325        | 1363.6311      | 682.3192         | 1362.6471      | 681.8272         | L    | 2870.5047 | 1435.7560       | 2853.4781      | 1427.2427        | 2852.4941      | 1426.7507        | 25 |
| 14 | 1493.7417 | 747.3745        | 1476.7151      | 738.8612         | 1475.7311      | 738.3692         | I    | 2757.4206 | 1379.2139       | 2740.3941      | 1370.7007        | 2739.4101      | 1370.2087        | 24 |
| 15 | 1607.7846 | 804.3959        | 1590.7581      | 795.8827         | 1589.7741      | 795.3907         | N    | 2644.3366 | 1322.6719       | 2627.3100      | 1314.1586        | 2626.3260      | 1313.6666        | 23 |
| 16 | 1736.8272 | 868.9172        | 1719.8007      | 860.4040         | 1718.8166      | 859.9120         | E    | 2530.2936 | 1265.6505       | 2513.2671      | 1257.1372        | 2512.2831      | 1256.6452        | 22 |
| 17 | 1864.8858 | 932.9465        | 1847.8592      | 924.4333         | 1846.8752      | 923.9413         | Q    | 2401.2510 | 1201.1292       | 2384.2245      | 1192.6159        | 2383.2405      | 1192.1239        | 21 |
| 18 | 2050.9651 | 1025.9862       | 2033.9386      | 1017.4729        | 2032.9545      | 1016.9809        | W    | 2273.1925 | 1137.0999       | 2256.1659      | 1128.5866        | 2255.1819      | 1128.0946        | 20 |
| 19 | 2164.0492 | 1082.5282       | 2147.0226      | 1074.0149        | 2146.0386      | 1073.5229        | L    | 2087.1131 | 1044.0602       | 2070.0866      | 1035.5469        | 2069.1026      | 1035.0549        | 19 |
| 20 | 2277.1332 | 1139.0703       | 2260.1067      | 1130.5570        | 2259.1227      | 1130.0650        | L    | 1974.0291 | 987.5182        | 1957.0025      | 979.0049         | 1956.0185      | 978.5129         | 18 |
| 21 | 2378.1809 | 1189.5941       | 2361.1544      | 1181.0808        | 2360.1703      | 1180.5888        | T    | 1860.9450 | 930.9761        | 1843.9185      | 922.4629         | 1842.9345      | 921.9709         | 17 |
| 22 | 2479.2286 | 1240.1179       | 2462.2020      | 1231.6047        | 2461.2180      | 1231.1126        | T    | 1759.8973 | 880.4523        | 1742.8708      | 871.9390         | 1741.8868      | 871.4470         | 16 |

|    |           |           |           |           |           |           |   |           |          |           |          |           |          |    |
|----|-----------|-----------|-----------|-----------|-----------|-----------|---|-----------|----------|-----------|----------|-----------|----------|----|
| 23 | 2550.2657 | 1275.6365 | 2533.2392 | 1267.1232 | 2532.2551 | 1266.6312 | A | 1658.8497 | 829.9285 | 1641.8231 | 821.4152 | 1640.8391 | 820.9232 | 15 |
| 24 | 2678.3607 | 1339.6840 | 2661.3341 | 1331.1707 | 2660.3501 | 1330.6787 | K | 1587.8125 | 794.4099 | 1570.7860 | 785.8966 | 1569.8020 | 785.4046 | 14 |
| 25 | 2792.4036 | 1396.7054 | 2775.3770 | 1388.1922 | 2774.3930 | 1387.7002 | N | 1459.7176 | 730.3624 | 1442.6910 | 721.8492 | 1441.7070 | 721.3571 | 13 |
| 26 | 2905.4877 | 1453.2475 | 2888.4611 | 1444.7342 | 2887.4771 | 1444.2422 | L | 1345.6747 | 673.3410 | 1328.6481 | 664.8277 | 1327.6641 | 664.3357 | 12 |
| 27 | 3052.5561 | 1526.7817 | 3035.5295 | 1518.2684 | 3034.5455 | 1517.7764 | F | 1232.5906 | 616.7989 | 1215.5640 | 608.2857 | 1214.5800 | 607.7937 | 11 |
| 28 | 3165.6401 | 1583.3237 | 3148.6136 | 1574.8104 | 3147.6296 | 1574.3184 | L | 1085.5222 | 543.2647 | 1068.4956 | 534.7515 | 1067.5116 | 534.2594 | 10 |
| 29 | 3280.6671 | 1640.8372 | 3263.6405 | 1632.3239 | 3262.6565 | 1631.8319 | N | 972.4381  | 486.7227 | 955.4116  | 478.2094 | 954.4275  | 477.7174 | 9  |
| 30 | 3417.7260 | 1709.3666 | 3400.6994 | 1700.8534 | 3399.7154 | 1700.3614 | H | 857.4112  | 429.2092 | 840.3846  | 420.6959 | 839.4006  | 420.2039 | 8  |
| 31 | 3504.7580 | 1752.8826 | 3487.7315 | 1744.3694 | 3486.7475 | 1743.8774 | S | 720.3523  | 360.6798 | 703.3257  | 352.1665 | 702.3417  | 351.6745 | 7  |
| 32 | 3633.8006 | 1817.4039 | 3616.7741 | 1808.8907 | 3615.7900 | 1808.3987 | E | 633.3202  | 317.1638 | 616.2937  | 308.6505 | 615.3097  | 308.1585 | 6  |
| 33 | 3747.8435 | 1874.4254 | 3730.8170 | 1865.9121 | 3729.8330 | 1865.4201 | N | 504.2776  | 252.6425 | 487.2511  | 244.1292 | 486.2671  | 243.6372 | 5  |
| 34 | 3818.8807 | 1909.9440 | 3801.8541 | 1901.4307 | 3800.8701 | 1900.9387 | A | 390.2347  | 195.6210 | 373.2082  | 187.1077 | 372.2241  | 186.6157 | 4  |
| 35 | 3919.9283 | 1960.4678 | 3902.9018 | 1951.9545 | 3901.9178 | 1951.4625 | T | 319.1976  | 160.1024 | 302.1710  | 151.5892 | 301.1870  | 151.0972 | 3  |
| 36 | 3990.9654 | 1995.9864 | 3973.9389 | 1987.4731 | 3972.9549 | 1986.9811 | A | 218.1499  | 109.5786 | 201.1234  | 101.0653 |           |          | 2  |
| 37 |           |           |           |           |           |           | K | 147.1128  | 74.0600  | 130.0863  | 65.5468  |           |          | 1  |

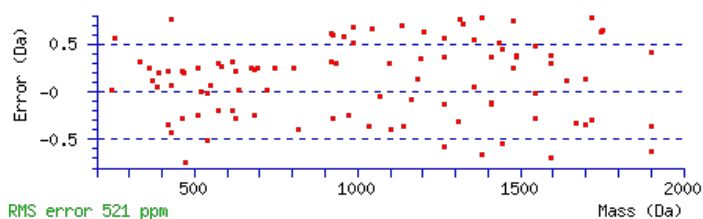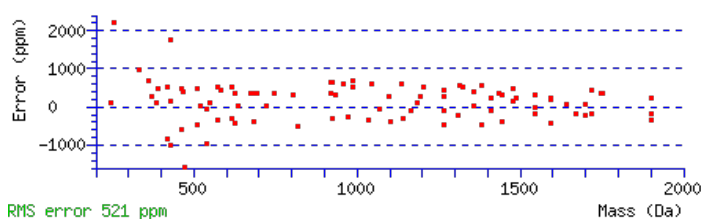

NCBI BLAST search of [MVSHHNLTTGATLINEQWLLTTAKNLFNLHSENATAK](#)

(Parameters: blastp, nr protein database, expect=20000, no filter, PAM30)

Other BLAST [web gateways](#)

All matches to this query

| Score | Mr(calc)  | Delta  | Sequence                                              | Site Analysis             |
|-------|-----------|--------|-------------------------------------------------------|---------------------------|
| 42.7  | 4136.0636 | 0.9979 | <a href="#">MVSHHNLTTGATLINEQWLLTTAKNLFNLHSENATAK</a> | Deamidated N6, N29 36.27% |
| 42.7  | 4136.0636 | 0.9979 | <a href="#">MVSHHNLTTGATLINEQWLLTTAKNLFNLHSENATAK</a> | Deamidated N6, N25 36.27% |
| 40.1  | 4136.0636 | 0.9979 | <a href="#">MVSHHNLTTGATLINEQWLLTTAKNLFNLHSENATAK</a> | Deamidated N6, N33 20.12% |
| 39.3  | 4137.0477 | 0.0139 | <a href="#">MVSHHNLTTGATLINEQWLLTTAKNLFNLHSENATAK</a> |                           |
| 38.8  | 4137.0477 | 0.0139 | <a href="#">MVSHHNLTTGATLINEQWLLTTAKNLFNLHSENATAK</a> |                           |
| 36.2  | 4137.0477 | 0.0139 | <a href="#">MVSHHNLTTGATLINEQWLLTTAKNLFNLHSENATAK</a> |                           |
| 31.8  | 4136.0636 | 0.9979 | <a href="#">MVSHHNLTTGATLINEQWLLTTAKNLFNLHSENATAK</a> | Deamidated N6, Q17 2.95%  |
| 27.9  | 4136.0636 | 0.9979 | <a href="#">MVSHHNLTTGATLINEQWLLTTAKNLFNLHSENATAK</a> | Deamidated N6, N15 1.21%  |
| 22.9  | 4136.0636 | 0.9979 | <a href="#">MVSHHNLTTGATLINEQWLLTTAKNLFNLHSENATAK</a> | Deamidated N29, N33 0.38% |
| 22.9  | 4136.0636 | 0.9979 | <a href="#">MVSHHNLTTGATLINEQWLLTTAKNLFNLHSENATAK</a> | Deamidated N25, N33 0.38% |

Mascot: <http://www.matrixscience.com/>

# MATRIX SCIENCE Mascot Search Results

## Peptide View

MS/MS Fragmentation of **MVSHHNLTTGATLINEQWLLTTAKNLFNLHSENATAK**

Found in **J3QR68** in **con\_Xuniprot\_HUMAN3**, J3QR68\_HUMAN Haptoglobin (Fragment) OS=Homo sapiens GN=HP PE=3 SV=1

Match to Query 28711: 4137.058270 from(828.418930,5+) intensity(717329.0000) rtinseconds(2574) scans(6723) index(25641)

Title: 111019\_Est\_MI\_YS\_G\_07Spectrum5791\_scans\_\_6723

Data file C:\mascot\20140703\_Tmgf\_1D\CSV\_UseAnalysis\MasterCSV\All\_Glyco\mgf\ptm\UC18ERLIC\_PTMTM\_35D.mgf

Click mouse within plot area to zoom in by factor of two about that point

Or, to Da

Label all possible matches Label matches used for scoring

Show Y-axis

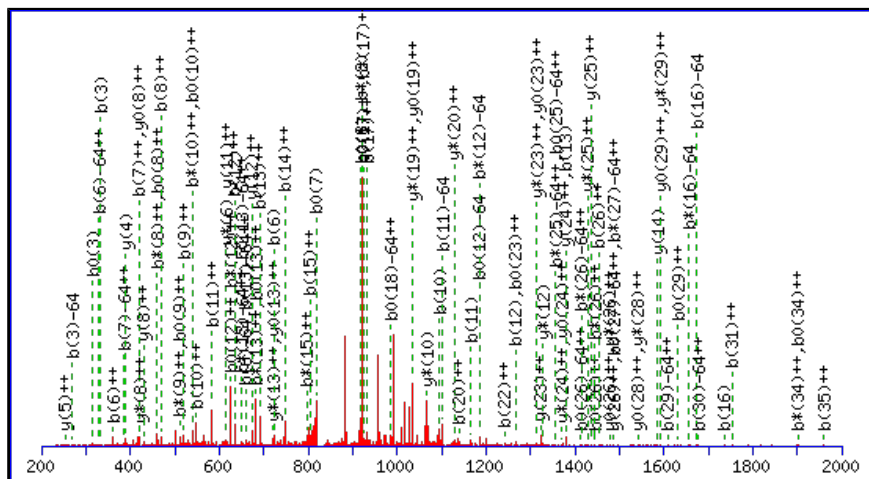

Monoisotopic mass of neutral peptide Mr(calc): 4137.0477

Fixed modifications: Carbamidomethyl (C) (apply to specified residues or termini only)

Variable modifications:

M1 : Oxidation (M), with neutral losses 0.0000(shown in table), 63.9983

N6 : Deamidated (NQ)

N15 : Deamidated (NQ)

Q17 : Deamidated (NQ)

Ions Score: 43 Expect: 0.012

Matches : 98/616 fragment ions using 154 most intense peaks ([help](#))

| #  | b                | b <sup>++</sup>  | b <sup>*</sup>  | b <sup>*++</sup> | b <sup>0</sup>  | b <sup>0++</sup> | Seq.     | y         | y <sup>++</sup>  | y <sup>*</sup> | y <sup>*++</sup> | y <sup>0</sup> | y <sup>0++</sup> | #  |
|----|------------------|------------------|-----------------|------------------|-----------------|------------------|----------|-----------|------------------|----------------|------------------|----------------|------------------|----|
| 1  | 148.0427         | 74.5250          |                 |                  |                 |                  | <b>M</b> |           |                  |                |                  |                |                  | 37 |
| 2  | 247.1111         | 124.0592         |                 |                  |                 |                  | <b>V</b> | 3991.0196 | 1996.0134        | 3973.9930      | 1987.5002        | 3973.0090      | 1987.0081        | 36 |
| 3  | <b>334.1431</b>  | 167.5752         |                 |                  | <b>316.1326</b> | 158.5699         | <b>S</b> | 3891.9512 | 1946.4792        | 3874.9246      | 1937.9660        | 3873.9406      | 1937.4739        | 35 |
| 4  | 471.2020         | 236.1047         |                 |                  | 453.1915        | 227.0994         | <b>H</b> | 3804.9191 | 1902.9632        | 3787.8926      | 1894.4499        | 3786.9086      | 1893.9579        | 34 |
| 5  | 608.2609         | 304.6341         |                 |                  | 590.2504        | 295.6288         | <b>H</b> | 3667.8602 | 1834.4338        | 3650.8337      | 1825.9205        | 3649.8497      | 1825.4285        | 33 |
| 6  | <b>723.2879</b>  | <b>362.1476</b>  | 706.2613        | 353.6343         | 705.2773        | 353.1423         | <b>N</b> | 3530.8013 | 1765.9043        | 3513.7748      | 1757.3910        | 3512.7908      | 1756.8990        | 32 |
| 7  | 836.3719         | <b>418.6896</b>  | 819.3454        | 410.1763         | <b>818.3614</b> | 409.6843         | <b>L</b> | 3415.7744 | 1708.3908        | 3398.7478      | 1699.8776        | 3397.7638      | 1699.3855        | 31 |
| 8  | 937.4196         | <b>469.2135</b>  | <b>920.3931</b> | <b>460.7002</b>  | <b>919.4091</b> | <b>460.2082</b>  | <b>T</b> | 3302.6903 | 1651.8488        | 3285.6638      | 1643.3355        | 3284.6798      | 1642.8435        | 30 |
| 9  | 1038.4673        | <b>519.7373</b>  | 1021.4408       | <b>511.2240</b>  | 1020.4567       | <b>510.7320</b>  | <b>T</b> | 3201.6426 | 1601.3250        | 3184.6161      | <b>1592.8117</b> | 3183.6321      | <b>1592.3197</b> | 29 |
| 10 | <b>1095.4888</b> | <b>548.2480</b>  | 1078.4622       | <b>539.7347</b>  | 1077.4782       | <b>539.2427</b>  | <b>G</b> | 3100.5950 | 1550.8011        | 3083.5684      | <b>1542.2878</b> | 3082.5844      | <b>1541.7958</b> | 28 |
| 11 | <b>1166.5259</b> | <b>583.7666</b>  | 1149.4993       | 575.2533         | 1148.5153       | 574.7613         | <b>A</b> | 3043.5735 | 1522.2904        | 3026.5469      | 1513.7771        | 3025.5629      | 1513.2851        | 27 |
| 12 | <b>1267.5736</b> | <b>634.2904</b>  | 1250.5470       | <b>625.7771</b>  | 1249.5630       | <b>625.2851</b>  | <b>T</b> | 2972.5364 | <b>1486.7718</b> | 2955.5098      | <b>1478.2586</b> | 2954.5258      | <b>1477.7665</b> | 26 |
| 13 | <b>1380.6576</b> | <b>690.8325</b>  | 1363.6311       | <b>682.3192</b>  | 1362.6471       | <b>681.8272</b>  | <b>L</b> | 2871.4887 | <b>1436.2480</b> | 2854.4622      | <b>1427.7347</b> | 2853.4781      | 1427.2427        | 25 |
| 14 | 1493.7417        | <b>747.3745</b>  | 1476.7151       | 738.8612         | 1475.7311       | 738.3692         | <b>I</b> | 2758.4046 | <b>1379.7060</b> | 2741.3781      | <b>1371.1927</b> | 2740.3941      | <b>1370.7007</b> | 24 |
| 15 | 1608.7686        | <b>804.8880</b>  | 1591.7421       | <b>796.3747</b>  | 1590.7581       | 795.8827         | <b>N</b> | 2645.3206 | <b>1323.1639</b> | 2628.2940      | <b>1314.6507</b> | 2627.3100      | <b>1314.1586</b> | 23 |
| 16 | <b>1737.8112</b> | 869.4093         | 1720.7847       | 860.8960         | 1719.8007       | 860.4040         | <b>E</b> | 2530.2936 | 1265.6505        | 2513.2671      | 1257.1372        | 2512.2831      | 1256.6452        | 22 |
| 17 | 1866.8538        | <b>933.9305</b>  | 1849.8273       | <b>925.4173</b>  | 1848.8433       | <b>924.9253</b>  | <b>Q</b> | 2401.2510 | 1201.1292        | 2384.2245      | 1192.6159        | 2383.2405      | 1192.1239        | 21 |
| 18 | 2052.9331        | 1026.9702        | 2035.9066       | 1018.4569        | 2034.9226       | 1017.9649        | <b>W</b> | 2272.2084 | 1136.6079        | 2255.1819      | <b>1128.0946</b> | 2254.1979      | 1127.6026        | 20 |
| 19 | 2166.0172        | 1083.5122        | 2148.9906       | 1074.9990        | 2148.0066       | 1074.5070        | <b>L</b> | 2086.1291 | 1043.5682        | 2069.1026      | <b>1035.0549</b> | 2068.1186      | <b>1034.5629</b> | 19 |
| 20 | 2279.1013        | <b>1140.0543</b> | 2262.0747       | 1131.5410        | 2261.0907       | 1131.0490        | <b>L</b> | 1973.0451 | 987.0262         | 1956.0185      | 978.5129         | 1955.0345      | 978.0209         | 18 |
| 21 | 2380.1489        | 1190.5781        | 2363.1224       | 1182.0648        | 2362.1384       | 1181.5728        | <b>T</b> | 1859.9610 | 930.4841         | 1842.9345      | 921.9709         | 1841.9504      | 921.4789         | 17 |

|    |           |                  |           |                  |           |                  |   |                  |                 |                  |                 |           |                 |    |
|----|-----------|------------------|-----------|------------------|-----------|------------------|---|------------------|-----------------|------------------|-----------------|-----------|-----------------|----|
| 22 | 2481.1966 | <b>1241.1019</b> | 2464.1701 | 1232.5887        | 2463.1861 | 1232.0967        | T | 1758.9133        | 879.9603        | 1741.8868        | 871.4470        | 1740.9028 | 870.9550        | 16 |
| 23 | 2552.2337 | 1276.6205        | 2535.2072 | 1268.1072        | 2534.2232 | <b>1267.6152</b> | A | 1657.8656        | 829.4365        | 1640.8391        | 820.9232        | 1639.8551 | 820.4312        | 15 |
| 24 | 2680.3287 | 1340.6680        | 2663.3021 | 1332.1547        | 2662.3181 | 1331.6627        | K | <b>1586.8285</b> | 793.9179        | 1569.8020        | 785.4046        | 1568.8180 | 784.9126        | 14 |
| 25 | 2794.3716 | 1397.6895        | 2777.3451 | 1389.1762        | 2776.3611 | 1388.6842        | N | 1458.7336        | 729.8704        | 1441.7070        | <b>721.3571</b> | 1440.7230 | <b>720.8651</b> | 13 |
| 26 | 2907.4557 | <b>1454.2315</b> | 2890.4291 | <b>1445.7182</b> | 2889.4451 | <b>1445.2262</b> | L | 1344.6906        | <b>672.8490</b> | <b>1327.6641</b> | 664.3357        | 1326.6801 | 663.8437        | 12 |
| 27 | 3054.5241 | 1527.7657        | 3037.4976 | 1519.2524        | 3036.5135 | 1518.7604        | F | 1231.6066        | <b>616.3069</b> | 1214.5800        | 607.7937        | 1213.5960 | 607.3016        | 11 |
| 28 | 3167.6082 | 1584.3077        | 3150.5816 | 1575.7944        | 3149.5976 | 1575.3024        | L | 1084.5382        | 542.7727        | <b>1067.5116</b> | 534.2594        | 1066.5276 | 533.7674        | 10 |
| 29 | 3281.6511 | 1641.3292        | 3264.6245 | 1632.8159        | 3263.6405 | <b>1632.3239</b> | N | 971.4541         | 486.2307        | 954.4275         | 477.7174        | 953.4435  | 477.2254        | 9  |
| 30 | 3418.7100 | 1709.8586        | 3401.6835 | 1701.3454        | 3400.6994 | 1700.8534        | H | 857.4112         | <b>429.2092</b> | 840.3846         | <b>420.6959</b> | 839.4006  | <b>420.2039</b> | 8  |
| 31 | 3505.7420 | <b>1753.3747</b> | 3488.7155 | 1744.8614        | 3487.7315 | 1744.3694        | S | 720.3523         | 360.6798        | 703.3257         | 352.1665        | 702.3417  | 351.6745        | 7  |
| 32 | 3634.7846 | 1817.8960        | 3617.7581 | 1809.3827        | 3616.7741 | 1808.8907        | E | 633.3202         | 317.1638        | <b>616.2937</b>  | 308.6505        | 615.3097  | 308.1585        | 6  |
| 33 | 3748.8276 | 1874.9174        | 3731.8010 | 1866.4041        | 3730.8170 | 1865.9121        | N | 504.2776         | <b>252.6425</b> | 487.2511         | 244.1292        | 486.2671  | 243.6372        | 5  |
| 34 | 3819.8647 | 1910.4360        | 3802.8381 | <b>1901.9227</b> | 3801.8541 | <b>1901.4307</b> | A | <b>390.2347</b>  | 195.6210        | 373.2082         | 187.1077        | 372.2241  | 186.6157        | 4  |
| 35 | 3920.9123 | <b>1960.9598</b> | 3903.8858 | 1952.4465        | 3902.9018 | 1951.9545        | T | 319.1976         | 160.1024        | 302.1710         | 151.5892        | 301.1870  | 151.0972        | 3  |
| 36 | 3991.9495 | 1996.4784        | 3974.9229 | 1987.9651        | 3973.9389 | 1987.4731        | A | 218.1499         | 109.5786        | 201.1234         | 101.0653        |           |                 | 2  |
| 37 |           |                  |           |                  |           |                  | K | 147.1128         | 74.0600         | 130.0863         | 65.5468         |           |                 | 1  |

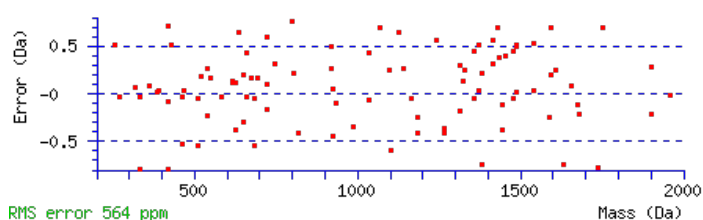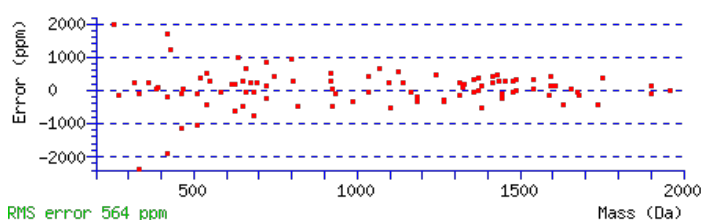

NCBI BLAST search of [MVSHHNLTGATLINEQWLLTTAKNLFNHSENATAK](#)

(Parameters: blastp, nr protein database, expect=20000, no filter, PAM30)

Other BLAST [web gateways](#)

All matches to this query

| Score | Mr(calc)  | Delta  | Sequence                                            | Site Analysis                   |
|-------|-----------|--------|-----------------------------------------------------|---------------------------------|
| 42.6  | 4137.0477 | 0.0106 | <a href="#">MVSHHNLTGATLINEQWLLTTAKNLFNHSENATAK</a> | Deamidated N6, N15, Q17 48.55%  |
| 40.0  | 4137.0477 | 0.0106 | <a href="#">MVSHHNLTGATLINEQWLLTTAKNLFNHSENATAK</a> | Deamidated N6, N29, N33 26.25%  |
| 36.8  | 4137.0477 | 0.0106 | <a href="#">MVSHHNLTGATLINEQWLLTTAKNLFNHSENATAK</a> | Deamidated N15, Q17, N25 12.71% |
| 32.2  | 4137.0477 | 0.0106 | <a href="#">MVSHHNLTGATLINEQWLLTTAKNLFNHSENATAK</a> | Deamidated N6, N15, N33 4.39%   |
| 32.2  | 4136.0636 | 0.9946 | <a href="#">MVSHHNLTGATLINEQWLLTTAKNLFNHSENATAK</a> |                                 |
| 32.2  | 4136.0636 | 0.9946 | <a href="#">MVSHHNLTGATLINEQWLLTTAKNLFNHSENATAK</a> |                                 |
| 32.2  | 4136.0636 | 0.9946 | <a href="#">MVSHHNLTGATLINEQWLLTTAKNLFNHSENATAK</a> |                                 |
| 32.2  | 4136.0636 | 0.9946 | <a href="#">MVSHHNLTGATLINEQWLLTTAKNLFNHSENATAK</a> |                                 |
| 32.2  | 4136.0636 | 0.9946 | <a href="#">MVSHHNLTGATLINEQWLLTTAKNLFNHSENATAK</a> |                                 |
| 31.4  | 4136.0636 | 0.9946 | <a href="#">MVSHHNLTGATLINEQWLLTTAKNLFNHSENATAK</a> |                                 |
| 23.8  | 4136.0636 | 0.9946 | <a href="#">MVSHHNLTGATLINEQWLLTTAKNLFNHSENATAK</a> |                                 |

Mascot: <http://www.matrixscience.com/>



# MATRIX SCIENCE Mascot Search Results

## Peptide View

MS/MS Fragmentation of **NLFLNHSENATAKDIAPTLTLYVGKK**

Found in **H3BS21** in **con\_Xuniprot\_HUMAN3**, H3BS21\_HUMAN Haptoglobin (Fragment) OS=Homo sapiens GN=HP PE=2 SV=1

Match to Query 25980: 2860.499296 from(716.132100,4+) intensity(19247.6445) rtinseconds(1963) scans(5209) index(24079)

Title: 111019\_Est\_MI\_YS\_G\_05Spectrum4501\_scans\_\_5209

Data file C:\mascot\20140703\_Tmgf\_1D\CSV\_UseAnalysis\MasterCSV\All\_Glyco\mgf\ptm\UC18ERLIC\_PTM\_35D.mgf

Click mouse within plot area to zoom in by factor of two about that point

Or,  to  Da

Label all possible matches  Label matches used for scoring

Show Y-axis

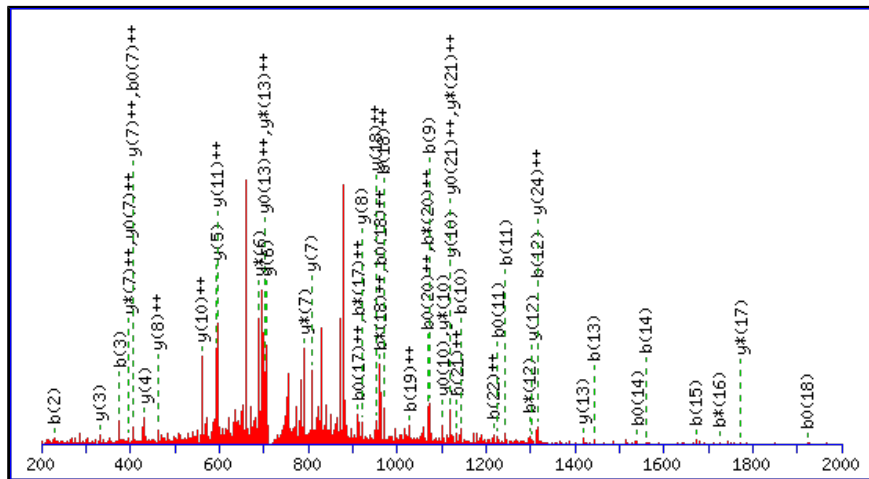

Monoisotopic mass of neutral peptide Mr(calc): 2860.4858

Fixed modifications: Carbamidomethyl (C) (apply to specified residues or termini only)

Variable modifications:

N1 : Deamidated (NQ)

N5 : Deamidated (NQ)

N9 : Deamidated (NQ)

Ions Score: 42 Expect: 0.0084

Matches : 51/276 fragment ions using 100 most intense peaks ([help](#))

| #  | b                | b <sup>++</sup>  | b <sup>*</sup>   | b <sup>*++</sup> | b <sup>0</sup>   | b <sup>0++</sup> | Seq. | y                | y <sup>++</sup>  | y <sup>*</sup>   | y <sup>*++</sup> | y <sup>0</sup>   | y <sup>0++</sup> | #  |
|----|------------------|------------------|------------------|------------------|------------------|------------------|------|------------------|------------------|------------------|------------------|------------------|------------------|----|
| 1  | 116.0342         | 58.5207          | 99.0077          | 50.0075          |                  |                  | N    |                  |                  |                  |                  |                  |                  | 26 |
| 2  | <b>229.1183</b>  | 115.0628         | 212.0917         | 106.5495         |                  |                  | L    | 2746.4662        | 1373.7367        | 2729.4396        | 1365.2235        | 2728.4556        | 1364.7314        | 25 |
| 3  | <b>376.1867</b>  | 188.5970         | 359.1601         | 180.0837         |                  |                  | F    | 2633.3821        | <b>1317.1947</b> | 2616.3556        | 1308.6814        | 2615.3715        | 1308.1894        | 24 |
| 4  | 489.2708         | 245.1390         | 472.2442         | 236.6257         |                  |                  | L    | 2486.3137        | 1243.6605        | 2469.2871        | 1235.1472        | 2468.3031        | 1234.6552        | 23 |
| 5  | 604.2977         | 302.6525         | 587.2712         | 294.1392         |                  |                  | N    | 2373.2296        | 1187.1185        | 2356.2031        | 1178.6052        | 2355.2191        | 1178.1132        | 22 |
| 6  | 741.3566         | 371.1819         | 724.3301         | 362.6687         |                  |                  | H    | 2258.2027        | 1129.6050        | 2241.1761        | <b>1121.0917</b> | 2240.1921        | <b>1120.5997</b> | 21 |
| 7  | 828.3886         | 414.6980         | 811.3621         | 406.1847         | 810.3781         | <b>405.6927</b>  | S    | 2121.1438        | 1061.0755        | 2104.1172        | 1052.5623        | 2103.1332        | 1052.0702        | 20 |
| 8  | 957.4312         | 479.2193         | 940.4047         | 470.7060         | 939.4207         | 470.2140         | E    | 2034.1118        | 1017.5595        | 2017.0852        | 1009.0462        | 2016.1012        | 1008.5542        | 19 |
| 9  | <b>1072.4582</b> | 536.7327         | 1055.4316        | 528.2195         | 1054.4476        | 527.7274         | N    | 1905.0692        | <b>953.0382</b>  | 1888.0426        | 944.5249         | 1887.0586        | 944.0329         | 18 |
| 10 | <b>1143.4953</b> | 572.2513         | 1126.4687        | 563.7380         | 1125.4847        | 563.2460         | A    | 1790.0422        | 895.5247         | <b>1773.0157</b> | 887.0115         | 1772.0316        | 886.5195         | 17 |
| 11 | <b>1244.5430</b> | 622.7751         | 1227.5164        | 614.2619         | <b>1226.5324</b> | 613.7698         | T    | 1719.0051        | 860.0062         | 1701.9786        | 851.4929         | 1700.9945        | 851.0009         | 16 |
| 12 | <b>1315.5801</b> | 658.2937         | <b>1298.5535</b> | 649.7804         | 1297.5695        | 649.2884         | A    | 1617.9574        | 809.4823         | 1600.9309        | 800.9691         | 1599.9469        | 800.4771         | 15 |
| 13 | <b>1443.6751</b> | 722.3412         | 1426.6485        | 713.8279         | 1425.6645        | 713.3359         | K    | 1546.9203        | 773.9638         | 1529.8938        | 765.4505         | 1528.9097        | 764.9585         | 14 |
| 14 | <b>1558.7020</b> | 779.8546         | 1541.6754        | 771.3414         | <b>1540.6914</b> | 770.8494         | D    | <b>1418.8253</b> | 709.9163         | 1401.7988        | <b>701.4030</b>  | 1400.8148        | <b>700.9110</b>  | 13 |
| 15 | <b>1671.7861</b> | 836.3967         | 1654.7595        | 827.8834         | 1653.7755        | 827.3914         | I    | <b>1303.7984</b> | 652.4028         | 1286.7719        | 643.8896         | 1285.7878        | 643.3976         | 12 |
| 16 | 1742.8232        | 871.9152         | <b>1725.7966</b> | 863.4019         | 1724.8126        | 862.9099         | A    | 1190.7143        | <b>595.8608</b>  | 1173.6878        | 587.3475         | 1172.7038        | 586.8555         | 11 |
| 17 | 1839.8759        | 920.4416         | 1822.8494        | <b>911.9283</b>  | 1821.8654        | <b>911.4363</b>  | P    | <b>1119.6772</b> | <b>560.3423</b>  | <b>1102.6507</b> | 551.8290         | <b>1101.6667</b> | 551.3370         | 10 |
| 18 | 1940.9236        | <b>970.9654</b>  | 1923.8971        | <b>962.4522</b>  | <b>1922.9130</b> | <b>961.9602</b>  | T    | 1022.6245        | 511.8159         | 1005.5979        | 503.3026         | 1004.6139        | 502.8106         | 9  |
| 19 | 2054.0077        | <b>1027.5075</b> | 2036.9811        | 1018.9942        | 2035.9971        | 1018.5022        | L    | <b>921.5768</b>  | <b>461.2920</b>  | 904.5502         | 452.7788         | 903.5662         | 452.2867         | 8  |
| 20 | 2155.0554        | 1078.0313        | 2138.0288        | <b>1069.5180</b> | 2137.0448        | <b>1069.0260</b> | T    | <b>808.4927</b>  | <b>404.7500</b>  | <b>791.4662</b>  | <b>396.2367</b>  | 790.4822         | <b>395.7447</b>  | 7  |
| 21 | 2268.1394        | <b>1134.5733</b> | 2251.1129        | 1126.0601        | 2250.1289        | 1125.5681        | L    | <b>707.4450</b>  | 354.2262         | <b>690.4185</b>  | 345.7129         |                  |                  | 6  |
| 22 | 2431.2027        | <b>1216.1050</b> | 2414.1762        | 1207.5917        | 2413.1922        | 1207.0997        | Y    | <b>594.3610</b>  | 297.6841         | 577.3344         | 289.1709         |                  |                  | 5  |



|    |           |           |           |           |           |           |   |          |          |          |          |  |  |   |
|----|-----------|-----------|-----------|-----------|-----------|-----------|---|----------|----------|----------|----------|--|--|---|
| 23 | 2530.2712 | 1265.6392 | 2513.2446 | 1257.1259 | 2512.2606 | 1256.6339 | V | 431.2976 | 216.1525 | 414.2711 | 207.6392 |  |  | 4 |
| 24 | 2587.2926 | 1294.1500 | 2570.2661 | 1285.6367 | 2569.2821 | 1285.1447 | G | 332.2292 | 166.6183 | 315.2027 | 158.1050 |  |  | 3 |
| 25 | 2715.3876 | 1358.1974 | 2698.3610 | 1349.6842 | 2697.3770 | 1349.1922 | K | 275.2078 | 138.1075 | 258.1812 | 129.5942 |  |  | 2 |
| 26 |           |           |           |           |           |           | K | 147.1128 | 74.0600  | 130.0863 | 65.5468  |  |  | 1 |

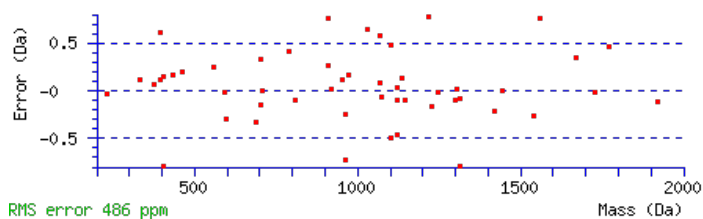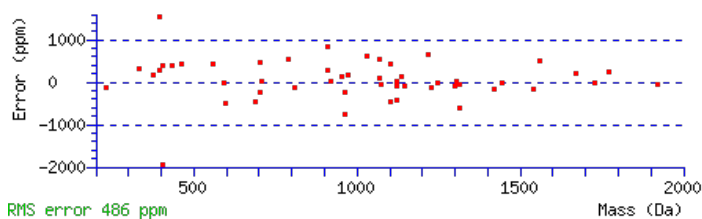

NCBI BLAST search of [NLFLNHSENATAKDIAPTLTLYVGKK](#)  
 (Parameters: blastp, nr protein database, expect=20000, no filter, PAM30)  
 Other BLAST [web gateways](#)

All matches to this query

| Score | Mr(calc)  | Delta  | Sequence                                    |
|-------|-----------|--------|---------------------------------------------|
| 42.5  | 2860.4858 | 0.0135 | <a href="#">NLFLNHSENATAKDIAPTLTLYVGKK</a>  |
| 28.0  | 2859.5018 | 0.9975 | <a href="#">NLFLNHSENATAKDIAPTLTLYVGKK</a>  |
| 27.5  | 2859.5018 | 0.9975 | <a href="#">NLFLNHSENATAKDIAPTLTLYVGKK</a>  |
| 27.0  | 2859.5018 | 0.9975 | <a href="#">NLFLNHSENATAKDIAPTLTLYVGKK</a>  |
| 5.2   | 2859.4874 | 1.0119 | <a href="#">GLPYEKQVKVPPSVMLNGISDMSAVK</a>  |
| 4.2   | 2858.4973 | 2.0020 | <a href="#">HKPQAPVIVKTEEVINMHTFNDRR</a>    |
| 4.2   | 2859.4874 | 1.0119 | <a href="#">GLPYEKQVKVPPSVMLNGISDMSAVK</a>  |
| 2.2   | 2859.4814 | 1.0179 | <a href="#">HKPQAPVIVKTEEVINMHTFNDRR</a>    |
| 0.5   | 2858.4787 | 2.0206 | <a href="#">ITGVGAVPLPASGNSFDVRPSQGYRRR</a> |

Mascot: <http://www.matrixscience.com/>

# MASCOT SCIENCE Mascot Search Results

## Peptide View

MS/MS Fragmentation of **MVSHHNLTTGATLINEQWLLTTAKNLFNLHSEENATAK**

Found in **J3QR68** in **con\_Xuniprot\_HUMAN3**, J3QR68\_HUMAN Haptoglobin (Fragment) OS=Homo sapiens GN=HP PE=3 SV=1

Match to Query 28888: 4137.076420 from(828.422560,5+) intensity(42867.8242) rtinseconds(2513) scans(6540) index(2282)

Title: 111019\_Est\_ISCardio\_NMI\_YP\_G\_4Spectrum5692\_scans\_\_6540

Data file C:\mascot\20140703\_Tmgf\_1D\CSV\_UseAnalysis\MasterCSV\All\_Glyco\mgf\ptm\UC18ERLIC\_PTM\_35D.mgf

Click mouse within plot area to zoom in by factor of two about that point

Or, to Da

Label all possible matches Label matches used for scoring

Show Y-axis

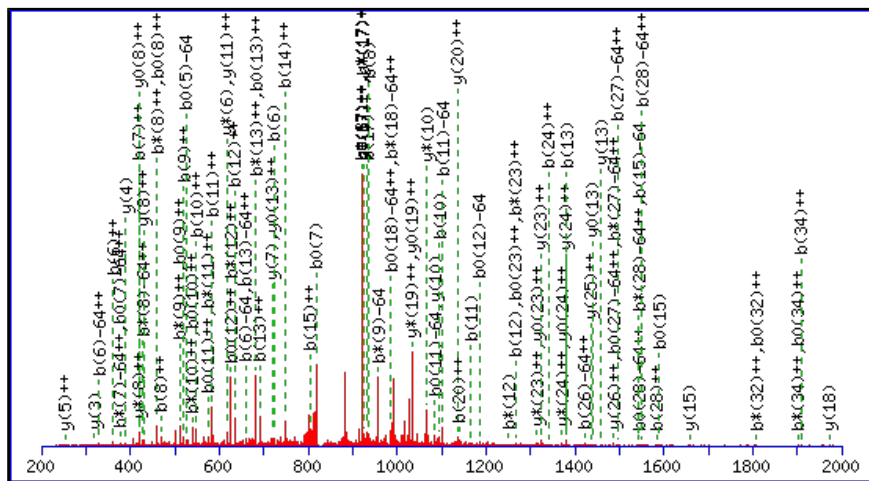

Monoisotopic mass of neutral peptide Mr(calc): 4136.0636

Fixed modifications: Carbamidomethyl (C) (apply to specified residues or termini only)

Variable modifications:

M1 : Oxidation (M), with neutral losses 0.0000(shown in table), 63.9983

N6 : Deamidated (NQ)

Q17 : Deamidated (NQ)

Ions Score: 42 Expect: 0.011

Matches : 95/616 fragment ions using 160 most intense peaks ([help](#))

| #  | b                | b <sup>++</sup>  | b <sup>*</sup>   | b <sup>*++</sup> | b <sup>0</sup>   | b <sup>0++</sup> | Seq.     | y                | y <sup>++</sup>  | y <sup>*</sup> | y <sup>*++</sup> | y <sup>0</sup> | y <sup>0++</sup> | #         |
|----|------------------|------------------|------------------|------------------|------------------|------------------|----------|------------------|------------------|----------------|------------------|----------------|------------------|-----------|
| 1  | 148.0427         | 74.5250          |                  |                  |                  |                  | <b>M</b> |                  |                  |                |                  |                |                  | <b>37</b> |
| 2  | 247.1111         | 124.0592         |                  |                  |                  |                  | <b>V</b> | 3990.0356        | 1995.5214        | 3973.0090      | 1987.0081        | 3972.0250      | 1986.5161        | <b>36</b> |
| 3  | 334.1431         | 167.5752         |                  |                  | 316.1326         | 158.5699         | <b>S</b> | 3890.9672        | 1945.9872        | 3873.9406      | 1937.4739        | 3872.9566      | 1936.9819        | <b>35</b> |
| 4  | 471.2020         | 236.1047         |                  |                  | 453.1915         | 227.0994         | <b>H</b> | 3803.9351        | 1902.4712        | 3786.9086      | 1893.9579        | 3785.9246      | 1893.4659        | <b>34</b> |
| 5  | 608.2609         | 304.6341         |                  |                  | 590.2504         | 295.6288         | <b>H</b> | 3666.8762        | 1833.9417        | 3649.8497      | 1825.4285        | 3648.8657      | 1824.9365        | <b>33</b> |
| 6  | <b>723.2879</b>  | <b>362.1476</b>  | 706.2613         | 353.6343         | 705.2773         | 353.1423         | <b>N</b> | 3529.8173        | 1765.4123        | 3512.7908      | 1756.8990        | 3511.8067      | 1756.4070        | <b>32</b> |
| 7  | 836.3719         | <b>418.6896</b>  | 819.3454         | 410.1763         | <b>818.3614</b>  | 409.6843         | <b>L</b> | 3414.7904        | 1707.8988        | 3397.7638      | 1699.3855        | 3396.7798      | 1698.8935        | <b>31</b> |
| 8  | <b>937.4196</b>  | <b>469.2135</b>  | <b>920.3931</b>  | <b>460.7002</b>  | 919.4091         | <b>460.2082</b>  | <b>T</b> | 3301.7063        | 1651.3568        | 3284.6798      | 1642.8435        | 3283.6957      | 1642.3515        | <b>30</b> |
| 9  | 1038.4673        | <b>519.7373</b>  | 1021.4408        | <b>511.2240</b>  | 1020.4567        | <b>510.7320</b>  | <b>T</b> | 3200.6586        | 1600.8329        | 3183.6321      | 1592.3197        | 3182.6481      | 1591.8277        | <b>29</b> |
| 10 | <b>1095.4888</b> | <b>548.2480</b>  | 1078.4622        | <b>539.7347</b>  | 1077.4782        | <b>539.2427</b>  | <b>G</b> | 3099.6109        | 1550.3091        | 3082.5844      | 1541.7958        | 3081.6004      | 1541.3038        | <b>28</b> |
| 11 | <b>1166.5259</b> | <b>583.7666</b>  | 1149.4993        | <b>575.2533</b>  | 1148.5153        | <b>574.7613</b>  | <b>A</b> | 3042.5895        | 1521.7984        | 3025.5629      | 1513.2851        | 3024.5789      | 1512.7931        | <b>27</b> |
| 12 | <b>1267.5736</b> | <b>634.2904</b>  | <b>1250.5470</b> | <b>625.7771</b>  | 1249.5630        | <b>625.2851</b>  | <b>T</b> | 2971.5524        | <b>1486.2798</b> | 2954.5258      | 1477.7665        | 2953.5418      | 1477.2745        | <b>26</b> |
| 13 | <b>1380.6576</b> | <b>690.8325</b>  | 1363.6311        | <b>682.3192</b>  | 1362.6471        | <b>681.8272</b>  | <b>L</b> | 2870.5047        | <b>1435.7560</b> | 2853.4781      | 1427.2427        | 2852.4941      | 1426.7507        | <b>25</b> |
| 14 | 1493.7417        | <b>747.3745</b>  | 1476.7151        | 738.8612         | 1475.7311        | 738.3692         | <b>I</b> | 2757.4206        | <b>1379.2139</b> | 2740.3941      | <b>1370.7007</b> | 2739.4101      | <b>1370.2087</b> | <b>24</b> |
| 15 | 1607.7846        | <b>804.3959</b>  | 1590.7581        | 795.8827         | <b>1589.7741</b> | 795.3907         | <b>N</b> | 2644.3366        | <b>1322.6719</b> | 2627.3100      | <b>1314.1586</b> | 2626.3260      | <b>1313.6666</b> | <b>23</b> |
| 16 | 1736.8272        | 868.9172         | 1719.8007        | 860.4040         | 1718.8166        | 859.9120         | <b>E</b> | 2530.2936        | 1265.6505        | 2513.2671      | 1257.1372        | 2512.2831      | 1256.6452        | <b>22</b> |
| 17 | 1865.8698        | <b>933.4385</b>  | 1848.8433        | <b>924.9253</b>  | 1847.8592        | <b>924.4333</b>  | <b>Q</b> | 2401.2510        | 1201.1292        | 2384.2245      | 1192.6159        | 2383.2405      | 1192.1239        | <b>21</b> |
| 18 | 2051.9491        | 1026.4782        | 2034.9226        | 1017.9649        | 2033.9386        | 1017.4729        | <b>W</b> | 2272.2084        | <b>1136.6079</b> | 2255.1819      | 1128.0946        | 2254.1979      | 1127.6026        | <b>20</b> |
| 19 | 2165.0332        | 1083.0202        | 2148.0066        | 1074.5070        | 2147.0226        | 1074.0149        | <b>L</b> | 2086.1291        | 1043.5682        | 2069.1026      | <b>1035.0549</b> | 2068.1186      | <b>1034.5629</b> | <b>19</b> |
| 20 | 2278.1172        | <b>1139.5623</b> | 2261.0907        | 1131.0490        | 2260.1067        | 1130.5570        | <b>L</b> | <b>1973.0451</b> | 987.0262         | 1956.0185      | 978.5129         | 1955.0345      | 978.0209         | <b>18</b> |
| 21 | 2379.1649        | 1190.0861        | 2362.1384        | 1181.5728        | 2361.1544        | 1181.0808        | <b>T</b> | 1859.9610        | 930.4841         | 1842.9345      | <b>921.9709</b>  | 1841.9504      | <b>921.4789</b>  | <b>17</b> |
| 22 | 2480.2126        | 1240.6099        | 2463.1861        | 1232.0967        | 2462.2020        | 1231.6047        | <b>T</b> | 1758.9133        | 879.9603         | 1741.8868      | 871.4470         | 1740.9028      | 870.9550         | <b>16</b> |

|    |           |           |           |           |           |           |   |           |          |           |          |           |          |    |
|----|-----------|-----------|-----------|-----------|-----------|-----------|---|-----------|----------|-----------|----------|-----------|----------|----|
| 23 | 2551.2497 | 1276.1285 | 2534.2232 | 1267.6152 | 2533.2392 | 1267.1232 | A | 1657.8656 | 829.4365 | 1640.8391 | 820.9232 | 1639.8551 | 820.4312 | 15 |
| 24 | 2679.3447 | 1340.1760 | 2662.3181 | 1331.6627 | 2661.3341 | 1331.1707 | K | 1586.8285 | 793.9179 | 1569.8020 | 785.4046 | 1568.8180 | 784.9126 | 14 |
| 25 | 2793.3876 | 1397.1974 | 2776.3611 | 1388.6842 | 2775.3770 | 1388.1922 | N | 1458.7336 | 729.8704 | 1441.7070 | 721.3571 | 1440.7230 | 720.8651 | 13 |
| 26 | 2906.4717 | 1453.7395 | 2889.4451 | 1445.2262 | 2888.4611 | 1444.7342 | L | 1344.6906 | 672.8490 | 1327.6641 | 664.3357 | 1326.6801 | 663.8437 | 12 |
| 27 | 3053.5401 | 1527.2737 | 3036.5135 | 1518.7604 | 3035.5295 | 1518.2684 | F | 1231.6066 | 616.3069 | 1214.5800 | 607.7937 | 1213.5960 | 607.3016 | 11 |
| 28 | 3166.6242 | 1583.8157 | 3149.5976 | 1575.3024 | 3148.6136 | 1574.8104 | L | 1084.5382 | 542.7727 | 1067.5116 | 534.2594 | 1066.5276 | 533.7674 | 10 |
| 29 | 3280.6671 | 1640.8372 | 3263.6405 | 1632.3239 | 3262.6565 | 1631.8319 | N | 971.4541  | 486.2307 | 954.4275  | 477.7174 | 953.4435  | 477.2254 | 9  |
| 30 | 3417.7260 | 1709.3666 | 3400.6994 | 1700.8534 | 3399.7154 | 1700.3614 | H | 857.4112  | 429.2092 | 840.3846  | 420.6959 | 839.4006  | 420.2039 | 8  |
| 31 | 3504.7580 | 1752.8826 | 3487.7315 | 1744.3694 | 3486.7475 | 1743.8774 | S | 720.3523  | 360.6798 | 703.3257  | 352.1665 | 702.3417  | 351.6745 | 7  |
| 32 | 3633.8006 | 1817.4039 | 3616.7741 | 1808.8907 | 3615.7900 | 1808.3987 | E | 633.3202  | 317.1638 | 616.2937  | 308.6505 | 615.3097  | 308.1585 | 6  |
| 33 | 3747.8435 | 1874.4254 | 3730.8170 | 1865.9121 | 3729.8330 | 1865.4201 | N | 504.2776  | 252.6425 | 487.2511  | 244.1292 | 486.2671  | 243.6372 | 5  |
| 34 | 3818.8807 | 1909.9440 | 3801.8541 | 1901.4307 | 3800.8701 | 1900.9387 | A | 390.2347  | 195.6210 | 373.2082  | 187.1077 | 372.2241  | 186.6157 | 4  |
| 35 | 3919.9283 | 1960.4678 | 3902.9018 | 1951.9545 | 3901.9178 | 1951.4625 | T | 319.1976  | 160.1024 | 302.1710  | 151.5892 | 301.1870  | 151.0972 | 3  |
| 36 | 3990.9654 | 1995.9864 | 3973.9389 | 1987.4731 | 3972.9549 | 1986.9811 | A | 218.1499  | 109.5786 | 201.1234  | 101.0653 |           |          | 2  |
| 37 |           |           |           |           |           |           | K | 147.1128  | 74.0600  | 130.0863  | 65.5468  |           |          | 1  |

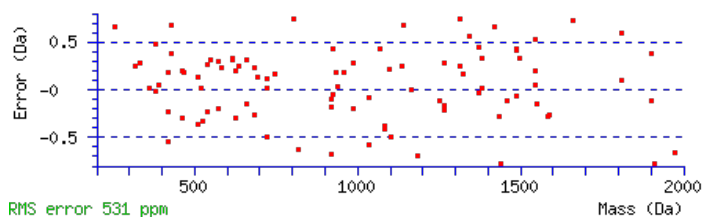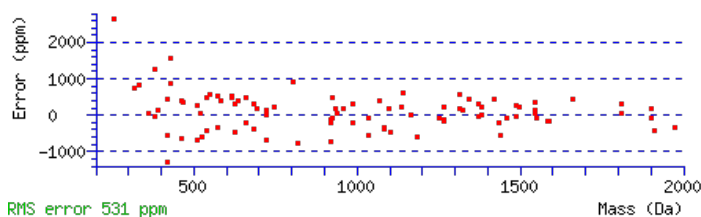

NCBI BLAST search of [MVSHHNLTTGATLINEQWLLTTAKNLFNLHSENATAK](#)

(Parameters: blastp, nr protein database, expect=20000, no filter, PAM30)

Other BLAST [web gateways](#)

All matches to this query

| Score | Mr(calc)  | Delta  | Sequence                                              | Site Analysis             |
|-------|-----------|--------|-------------------------------------------------------|---------------------------|
| 42.5  | 4136.0636 | 1.0128 | <a href="#">MVSHHNLTTGATLINEQWLLTTAKNLFNLHSENATAK</a> | Deamidated N6, Q17 25.36% |
| 42.1  | 4135.0796 | 1.9968 | <a href="#">MVSHHNLTTGATLINEQWLLTTAKNLFNLHSENATAK</a> |                           |
| 41.7  | 4136.0636 | 1.0128 | <a href="#">MVSHHNLTTGATLINEQWLLTTAKNLFNLHSENATAK</a> | Deamidated N6, N29 21.39% |
| 41.7  | 4136.0636 | 1.0128 | <a href="#">MVSHHNLTTGATLINEQWLLTTAKNLFNLHSENATAK</a> | Deamidated N6, N33 21.19% |
| 40.8  | 4136.0636 | 1.0128 | <a href="#">MVSHHNLTTGATLINEQWLLTTAKNLFNLHSENATAK</a> | Deamidated N6, N15 17.42% |
| 38.6  | 4136.0636 | 1.0128 | <a href="#">MVSHHNLTTGATLINEQWLLTTAKNLFNLHSENATAK</a> | Deamidated N6, N25 10.38% |
| 26.5  | 4136.0636 | 1.0128 | <a href="#">MVSHHNLTTGATLINEQWLLTTAKNLFNLHSENATAK</a> | Deamidated N15, N29 0.65% |
| 26.3  | 4136.0636 | 1.0128 | <a href="#">MVSHHNLTTGATLINEQWLLTTAKNLFNLHSENATAK</a> | Deamidated Q17, N29 0.61% |
| 25.1  | 4136.0636 | 1.0128 | <a href="#">MVSHHNLTTGATLINEQWLLTTAKNLFNLHSENATAK</a> | Deamidated N15, N33 0.47% |
| 24.9  | 4136.0636 | 1.0128 | <a href="#">MVSHHNLTTGATLINEQWLLTTAKNLFNLHSENATAK</a> | Deamidated Q17, N33 0.44% |

Mascot: <http://www.matrixscience.com/>

# MATRIX SCIENCE Mascot Search Results

## Peptide View

MS/MS Fragmentation of **MVSHHNLTTGATLINEQWLLTTAK**

Found in **J3QR68** in **con\_Xuniprot\_HUMAN3**, J3QR68\_HUMAN Haptoglobin (Fragment) OS=Homo sapiens GN=HP PE=3 SV=1

Match to Query 23773: 2680.359656 from(671.097190,4+) intensity(17023.2227) rtinseconds(2732) scans(6799) index(17105)

Title: 111019\_Est\_MI\_YP\_G\_06Spectrum5698\_scans\_\_6799

Data file C:\mascot\20140703\_Tmgf\_1D\CSV\_UseAnalysis\MasterCSV\All\_Glyco\mgf\ptm\UC18ERLIC\_PTM\_35D.mgf

Click mouse within plot area to zoom in by factor of two about that point

Or, to Da

Label all possible matches Label matches used for scoring

Show Y-axis

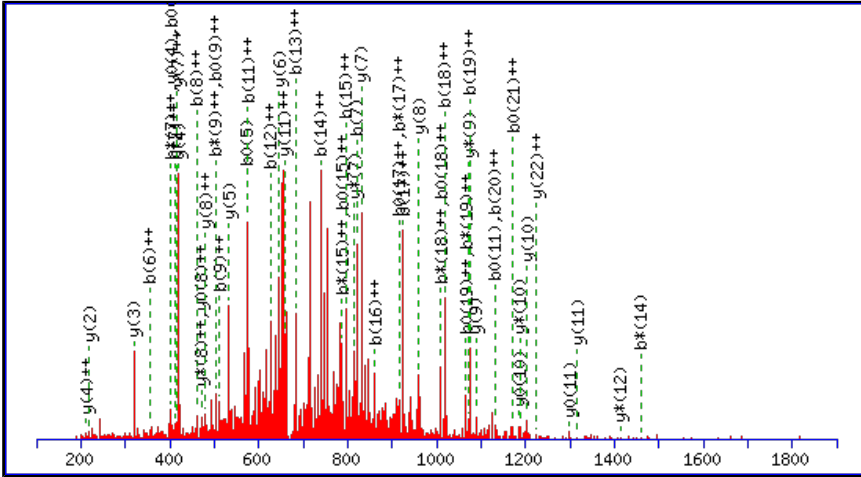

Monoisotopic mass of neutral peptide Mr(calc): 2680.3530

Fixed modifications: Carbamidomethyl (C) (apply to specified residues or termini only)

Variable modifications:

N6 : Deamidated (NQ)

N15 : Deamidated (NQ)

Ions Score: 41 Expect: 0.02

Matches : 55/258 fragment ions using 124 most intense peaks ([help](#))

| #  | b         | b <sup>++</sup> | b <sup>*</sup> | b <sup>*++</sup> | b <sup>0</sup> | b <sup>0++</sup> | Seq. | y         | y <sup>++</sup> | y <sup>*</sup> | y <sup>*++</sup> | y <sup>0</sup> | y <sup>0++</sup> | #  |
|----|-----------|-----------------|----------------|------------------|----------------|------------------|------|-----------|-----------------|----------------|------------------|----------------|------------------|----|
| 1  | 132.0478  | 66.5275         |                |                  |                |                  | M    |           |                 |                |                  |                |                  | 24 |
| 2  | 231.1162  | 116.0617        |                |                  |                |                  | V    | 2550.3198 | 1275.6636       | 2533.2933      | 1267.1503        | 2532.3093      | 1266.6583        | 23 |
| 3  | 318.1482  | 159.5777        |                |                  | 300.1376       | 150.5725         | S    | 2451.2514 | 1226.1294       | 2434.2249      | 1217.6161        | 2433.2409      | 1217.1241        | 22 |
| 4  | 455.2071  | 228.1072        |                |                  | 437.1966       | 219.1019         | H    | 2364.2194 | 1182.6133       | 2347.1929      | 1174.1001        | 2346.2088      | 1173.6081        | 21 |
| 5  | 592.2660  | 296.6367        |                |                  | 574.2555       | 287.6314         | H    | 2227.1605 | 1114.0839       | 2210.1339      | 1105.5706        | 2209.1499      | 1105.0786        | 20 |
| 6  | 707.2930  | 354.1501        | 690.2664       | 345.6368         | 689.2824       | 345.1448         | N    | 2090.1016 | 1045.5544       | 2073.0750      | 1037.0412        | 2072.0910      | 1036.5491        | 19 |
| 7  | 820.3770  | 410.6922        | 803.3505       | 402.1789         | 802.3665       | 401.6869         | L    | 1975.0746 | 988.0410        | 1958.0481      | 979.5277         | 1957.0641      | 979.0357         | 18 |
| 8  | 921.4247  | 461.2160        | 904.3982       | 452.7027         | 903.4141       | 452.2107         | T    | 1861.9906 | 931.4989        | 1844.9640      | 922.9857         | 1843.9800      | 922.4936         | 17 |
| 9  | 1022.4724 | 511.7398        | 1005.4458      | 503.2266         | 1004.4618      | 502.7346         | T    | 1760.9429 | 880.9751        | 1743.9163      | 872.4618         | 1742.9323      | 871.9698         | 16 |
| 10 | 1079.4939 | 540.2506        | 1062.4673      | 531.7373         | 1061.4833      | 531.2453         | G    | 1659.8952 | 830.4512        | 1642.8687      | 821.9380         | 1641.8847      | 821.4460         | 15 |
| 11 | 1150.5310 | 575.7691        | 1133.5044      | 567.2558         | 1132.5204      | 566.7638         | A    | 1602.8738 | 801.9405        | 1585.8472      | 793.4272         | 1584.8632      | 792.9352         | 14 |
| 12 | 1251.5786 | 626.2930        | 1234.5521      | 617.7797         | 1233.5681      | 617.2877         | T    | 1531.8366 | 766.4220        | 1514.8101      | 757.9087         | 1513.8261      | 757.4167         | 13 |
| 13 | 1364.6627 | 682.8350        | 1347.6362      | 674.3217         | 1346.6521      | 673.8297         | L    | 1430.7890 | 715.8981        | 1413.7624      | 707.3848         | 1412.7784      | 706.8928         | 12 |
| 14 | 1477.7468 | 739.3770        | 1460.7202      | 730.8638         | 1459.7362      | 730.3717         | I    | 1317.7049 | 659.3561        | 1300.6783      | 650.8428         | 1299.6943      | 650.3508         | 11 |
| 15 | 1592.7737 | 796.8905        | 1575.7472      | 788.3772         | 1574.7632      | 787.8852         | N    | 1204.6208 | 602.8141        | 1187.5943      | 594.3008         | 1186.6103      | 593.8088         | 10 |
| 16 | 1721.8163 | 861.4118        | 1704.7898      | 852.8985         | 1703.8057      | 852.4065         | E    | 1089.5939 | 545.3006        | 1072.5673      | 536.7873         | 1071.5833      | 536.2953         | 9  |
| 17 | 1849.8749 | 925.4411        | 1832.8483      | 916.9278         | 1831.8643      | 916.4358         | Q    | 960.5513  | 480.7793        | 943.5247       | 472.2660         | 942.5407       | 471.7740         | 8  |
| 18 | 2035.9542 | 1018.4807       | 2018.9277      | 1009.9675        | 2017.9436      | 1009.4755        | W    | 832.4927  | 416.7500        | 815.4662       | 408.2367         | 814.4822       | 407.7447         | 7  |
| 19 | 2149.0383 | 1075.0228       | 2132.0117      | 1066.5095        | 2131.0277      | 1066.0175        | L    | 646.4134  | 323.7103        | 629.3869       | 315.1971         | 628.4028       | 314.7051         | 6  |
| 20 | 2262.1223 | 1131.5648       | 2245.0958      | 1123.0515        | 2244.1118      | 1122.5595        | L    | 533.3293  | 267.1683        | 516.3028       | 258.6550         | 515.3188       | 258.1630         | 5  |
| 21 | 2363.1700 | 1182.0886       | 2346.1435      | 1173.5754        | 2345.1594      | 1173.0834        | T    | 420.2453  | 210.6263        | 403.2187       | 202.1130         | 402.2347       | 201.6210         | 4  |
| 22 | 2464.2177 | 1232.6125       | 2447.1911      | 1224.0992        | 2446.2071      | 1223.6072        | T    | 319.1976  | 160.1024        | 302.1710       | 151.5892         | 301.1870       | 151.0972         | 3  |

|    |           |           |           |           |           |           |   |          |          |          |          |  |  |   |
|----|-----------|-----------|-----------|-----------|-----------|-----------|---|----------|----------|----------|----------|--|--|---|
| 23 | 2535.2548 | 1268.1310 | 2518.2283 | 1259.6178 | 2517.2442 | 1259.1258 | A | 218.1499 | 109.5786 | 201.1234 | 101.0653 |  |  | 2 |
| 24 |           |           |           |           |           |           | K | 147.1128 | 74.0600  | 130.0863 | 65.5468  |  |  | 1 |

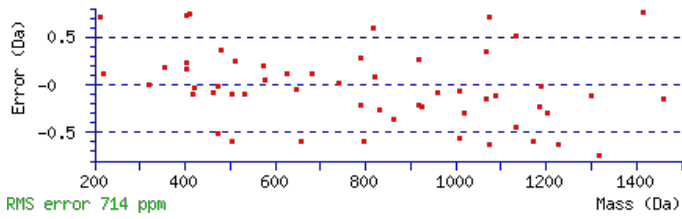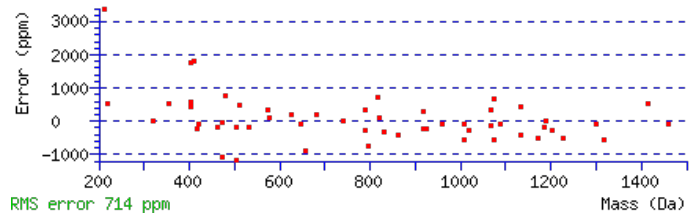

NCBI BLAST search of [MVSHHNLTTGATLINEQWLLTTAK](#)  
 (Parameters: blastp, nr protein database, expect=20000, no filter, PAM30)  
 Other BLAST [web gateways](#)

All matches to this query

| Score | Mr(calc)  | Delta   | Sequence                                  | Site Analysis             |
|-------|-----------|---------|-------------------------------------------|---------------------------|
| 41.0  | 2680.3530 | 0.0066  | <a href="#">MVSHHNLTTGATLINEQWLLTTAK</a>  | Deamidated N6, N15 53.10% |
| 40.0  | 2680.3530 | 0.0066  | <a href="#">MVSHHNLTTGATLINEQWLLTTAK</a>  | Deamidated N6, Q17 42.96% |
| 36.9  | 2679.3690 | 0.9906  | <a href="#">MVSHHNLTTGATLINEQWLLTTAK</a>  |                           |
| 29.8  | 2679.3690 | 0.9906  | <a href="#">MVSHHNLTTGATLINEQWLLTTAK</a>  |                           |
| 29.7  | 2680.3530 | 0.0066  | <a href="#">MVSHHNLTTGATLINEQWLLTTAK</a>  | Deamidated N15, Q17 3.95% |
| 27.2  | 2679.3690 | 0.9906  | <a href="#">MVSHHNLTTGATLINEQWLLTTAK</a>  |                           |
| 17.0  | 2678.3446 | 2.0150  | <a href="#">SVSNLGVSGELAPCGRVSGQLVYSR</a> |                           |
| 9.6   | 2679.3676 | 0.9920  | <a href="#">NILKMLESDGATEVSAALQGKK</a>    |                           |
| 7.6   | 2680.3642 | -0.0046 | <a href="#">FPASVPMGAQDLISKLLRHNPSER</a>  |                           |
| 6.5   | 2680.3629 | -0.0033 | <a href="#">RLISMGLEFATVGTQDLKAEELDEK</a> |                           |

Mascot: <http://www.matrixscience.com/>

# MASCOT SCIENCE Mascot Search Results

## Peptide View

MS/MS Fragmentation of **KQLVEIEKVVLPNYSQVDIGLIK**

Found in **H3BS21** in **con\_Xuniprot\_HUMAN3**, H3BS21\_HUMAN Haptoglobin (Fragment) OS=Homo sapiens GN=HP PE=2 SV=1

Match to Query 25468: 2764.553136 from(692.145560,4+) intensity(34915.6055) rtinseconds(1857) scans(4441) index(8971)

Title: 111019\_Est\_ISCardio\_NMI\_YS\_G\_4Spectrum3806\_scans\_\_4441

Data file C:\mascot\20140703\_Tmgf\_1D\CSV\_UseAnalysis\MasterCSV\All\_Glyco\mgf\ptm\UC18ERLIC\_PTM\_35D.mgf

Click mouse within plot area to zoom in by factor of two about that point

Or, to Da

Label all possible matches Label matches used for scoring

Show Y-axis

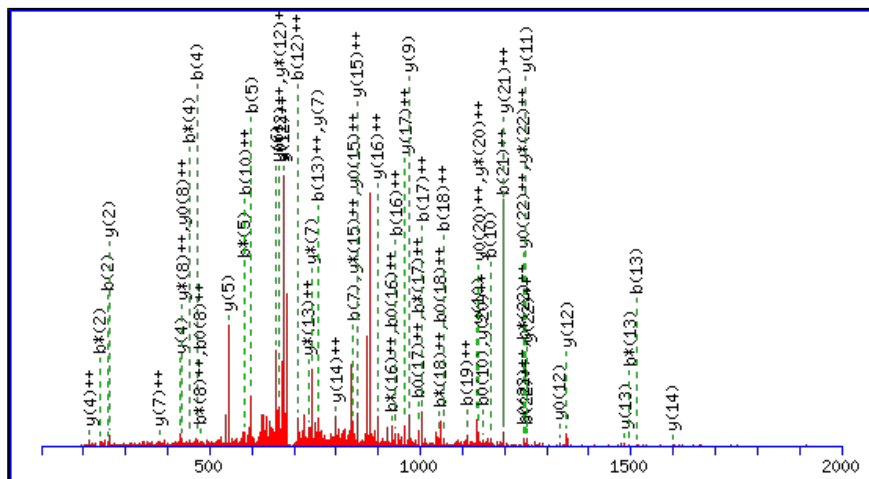

Monoisotopic mass of neutral peptide Mr(calc): 2762.5582

Fixed modifications: Carbamidomethyl (C) (apply to specified residues or termini only)

Variable modifications:

N14 : Deamidated (NQ)

Ions Score: 40 Expect: 0.0027

Matches : 64/258 fragment ions using 143 most intense peaks ([help](#))

| #  | b                | b <sup>++</sup>  | b <sup>*</sup>   | b <sup>*++</sup> | b <sup>0</sup>   | b <sup>0++</sup> | Seq.     | y                | y <sup>++</sup>  | y <sup>*</sup>  | y <sup>*++</sup> | y <sup>0</sup>   | y <sup>0++</sup> | #         |
|----|------------------|------------------|------------------|------------------|------------------|------------------|----------|------------------|------------------|-----------------|------------------|------------------|------------------|-----------|
| 1  | 129.1022         | 65.0548          | 112.0757         | 56.5415          |                  |                  | <b>K</b> |                  |                  |                 |                  |                  |                  | <b>24</b> |
| 2  | <b>257.1608</b>  | 129.0840         | <b>240.1343</b>  | 120.5708         |                  |                  | <b>Q</b> | 2635.4705        | 1318.2389        | 2618.4440       | 1309.7256        | 2617.4600        | 1309.2336        | <b>23</b> |
| 3  | 370.2449         | 185.6261         | 353.2183         | 177.1128         |                  |                  | <b>L</b> | 2507.4120        | <b>1254.2096</b> | 2490.3854       | <b>1245.6963</b> | 2489.4014        | <b>1245.2043</b> | <b>22</b> |
| 4  | <b>469.3133</b>  | 235.1603         | <b>452.2867</b>  | 226.6470         |                  |                  | <b>V</b> | 2394.3279        | <b>1197.6676</b> | 2377.3013       | 1189.1543        | 2376.3173        | 1188.6623        | <b>21</b> |
| 5  | <b>598.3559</b>  | 299.6816         | <b>581.3293</b>  | 291.1683         | 580.3453         | 290.6763         | <b>E</b> | 2295.2595        | <b>1148.1334</b> | 2278.2329       | <b>1139.6201</b> | 2277.2489        | <b>1139.1281</b> | <b>20</b> |
| 6  | 711.4400         | 356.2236         | 694.4134         | 347.7103         | 693.4294         | 347.2183         | <b>I</b> | 2166.2169        | 1083.6121        | 2149.1903       | 1075.0988        | 2148.2063        | 1074.6068        | <b>19</b> |
| 7  | <b>840.4825</b>  | 420.7449         | 823.4560         | 412.2316         | 822.4720         | 411.7396         | <b>E</b> | 2053.1328        | 1027.0700        | 2036.1063       | 1018.5568        | 2035.1223        | 1018.0648        | <b>18</b> |
| 8  | 968.5775         | 484.7924         | 951.5510         | <b>476.2791</b>  | 950.5669         | <b>475.7871</b>  | <b>K</b> | 1924.0902        | <b>962.5488</b>  | 1907.0637       | 954.0355         | 1906.0797        | 953.5435         | <b>17</b> |
| 9  | 1067.6459        | 534.3266         | 1050.6194        | 525.8133         | 1049.6354        | 525.3213         | <b>V</b> | 1795.9953        | <b>898.5013</b>  | 1778.9687       | 889.9880         | 1777.9847        | 889.4960         | <b>16</b> |
| 10 | <b>1166.7143</b> | <b>583.8608</b>  | 1149.6878        | 575.3475         | <b>1148.7038</b> | 574.8555         | <b>V</b> | 1696.9268        | <b>848.9671</b>  | 1679.9003       | <b>840.4538</b>  | 1678.9163        | <b>839.9618</b>  | <b>15</b> |
| 11 | 1279.7984        | 640.4028         | 1262.7719        | 631.8896         | 1261.7878        | 631.3976         | <b>L</b> | <b>1597.8584</b> | <b>799.4329</b>  | 1580.8319       | 790.9196         | 1579.8479        | 790.4276         | <b>14</b> |
| 12 | 1416.8573        | <b>708.9323</b>  | 1399.8308        | 700.4190         | 1398.8467        | 699.9270         | <b>H</b> | <b>1484.7744</b> | 742.8908         | 1467.7478       | <b>734.3775</b>  | 1466.7638        | 733.8855         | <b>13</b> |
| 13 | <b>1513.9101</b> | <b>757.4587</b>  | <b>1496.8835</b> | 748.9454         | 1495.8995        | 748.4534         | <b>P</b> | <b>1347.7155</b> | <b>674.3614</b>  | 1330.6889       | <b>665.8481</b>  | <b>1329.7049</b> | <b>665.3561</b>  | <b>12</b> |
| 14 | 1628.9370        | 814.9721         | 1611.9105        | 806.4589         | 1610.9265        | 805.9669         | <b>N</b> | <b>1250.6627</b> | 625.8350         | 1233.6361       | 617.3217         | 1232.6521        | 616.8297         | <b>11</b> |
| 15 | 1792.0003        | 896.5038         | 1774.9738        | 887.9905         | 1773.9898        | 887.4985         | <b>Y</b> | <b>1135.6358</b> | 568.3215         | 1118.6092       | 559.8082         | 1117.6252        | 559.3162         | <b>10</b> |
| 16 | 1879.0324        | <b>940.0198</b>  | 1862.0058        | <b>931.5066</b>  | 1861.0218        | <b>931.0145</b>  | <b>S</b> | <b>972.5724</b>  | 486.7898         | 955.5459        | 478.2766         | 954.5619         | 477.7846         | <b>9</b>  |
| 17 | 2007.0910        | <b>1004.0491</b> | 1990.0644        | <b>995.5358</b>  | 1989.0804        | <b>995.0438</b>  | <b>Q</b> | 885.5404         | 443.2738         | 868.5138        | <b>434.7606</b>  | 867.5298         | <b>434.2686</b>  | <b>8</b>  |
| 18 | 2106.1594        | <b>1053.5833</b> | 2089.1328        | <b>1045.0700</b> | 2088.1488        | <b>1044.5780</b> | <b>V</b> | <b>757.4818</b>  | <b>379.2445</b>  | <b>740.4553</b> | 370.7313         | 739.4713         | 370.2393         | <b>7</b>  |
| 19 | 2221.1863        | <b>1111.0968</b> | 2204.1598        | 1102.5835        | 2203.1757        | 1102.0915        | <b>D</b> | <b>658.4134</b>  | 329.7103         | 641.3869        | 321.1971         | 640.4028         | 320.7051         | <b>6</b>  |
| 20 | 2334.2704        | 1167.6388        | 2317.2438        | 1159.1256        | 2316.2598        | 1158.6335        | <b>I</b> | <b>543.3865</b>  | 272.1969         | 526.3599        | 263.6836         |                  |                  | <b>5</b>  |
| 21 | 2391.2918        | <b>1196.1496</b> | 2374.2653        | 1187.6363        | 2373.2813        | 1187.1443        | <b>G</b> | <b>430.3024</b>  | <b>215.6548</b>  | 413.2758        | 207.1416         |                  |                  | <b>4</b>  |
| 22 | 2504.3759        | <b>1252.6916</b> | 2487.3494        | <b>1244.1783</b> | 2486.3653        | <b>1243.6863</b> | <b>L</b> | 373.2809         | 187.1441         | 356.2544        | 178.6308         |                  |                  | <b>3</b>  |
| 23 | 2617.4600        | 1309.2336        | 2600.4334        | 1300.7203        | 2599.4494        | 1300.2283        | <b>I</b> | <b>260.1969</b>  | 130.6021         | 243.1703        | 122.0888         |                  |                  | <b>2</b>  |

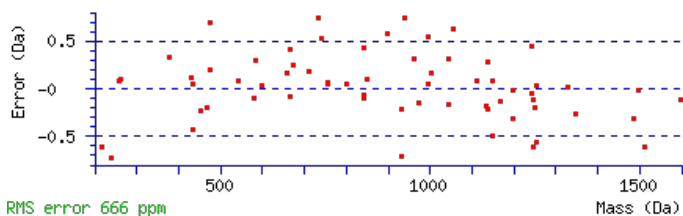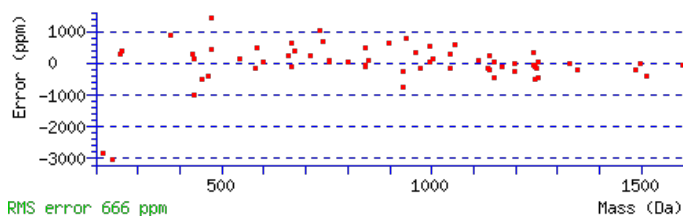

NCBI BLAST search of [KQLVEIEKVVLPNYSQVDIGLIK](#)

(Parameters: blastp, nr protein database, expect=20000, no filter, PAM30)

Other BLAST [web gateways](#)

All matches to this query

| Score | Mr(calc)  | Delta  | Sequence                                | Site Analysis         |
|-------|-----------|--------|-----------------------------------------|-----------------------|
| 39.5  | 2762.5582 | 1.9950 | <a href="#">KQLVEIEKVVLPNYSQVDIGLIK</a> | Deamidated N14 76.76% |
| 33.5  | 2762.5582 | 1.9950 | <a href="#">KQLVEIEKVVLPNYSQVDIGLIK</a> | Deamidated Q17 19.33% |
| 31.1  | 2763.5422 | 1.0109 | <a href="#">KQLVEIEKVVLPNYSQVDIGLIK</a> |                       |
| 29.5  | 2763.5422 | 1.0109 | <a href="#">KQLVEIEKVVLPNYSQVDIGLIK</a> |                       |
| 26.6  | 2762.5582 | 1.9950 | <a href="#">KQLVEIEKVVLPNYSQVDIGLIK</a> | Deamidated Q2 3.91%   |
| 26.5  | 2763.5422 | 1.0109 | <a href="#">KQLVEIEKVVLPNYSQVDIGLIK</a> |                       |

Mascot: <http://www.matrixscience.com/>



# MASCOT SCIENCE Mascot Search Results

## Peptide View

MS/MS Fragmentation of **QLVEIEKVVLPNYSQVDIGLIKLK**

Found in **H3BS21** in **con\_Xuniprot\_HUMAN3**, H3BS21\_HUMAN Haptoglobin (Fragment) OS=Homo sapiens GN=HP PE=2 SV=1

Match to Query 26010: 2875.647536 from(719.919160,4+) intensity(22602.9316) rtinseconds(2170) scans(5799) index(24125)

Title: 111019\_Est\_MI\_YS\_G\_05Spectrum5018\_scans\_\_5799

Data file C:\mascot\20140703\_Tmgf\_1D\CSV\_UseAnalysis\MasterCSV\All\_Glyco\mgf\ptm\UC18ERLIC\_PTM\_35D.mgf

Click mouse within plot area to zoom in by factor of two about that point

Or, to Da

Label all possible matches Label matches used for scoring

Show Y-axis

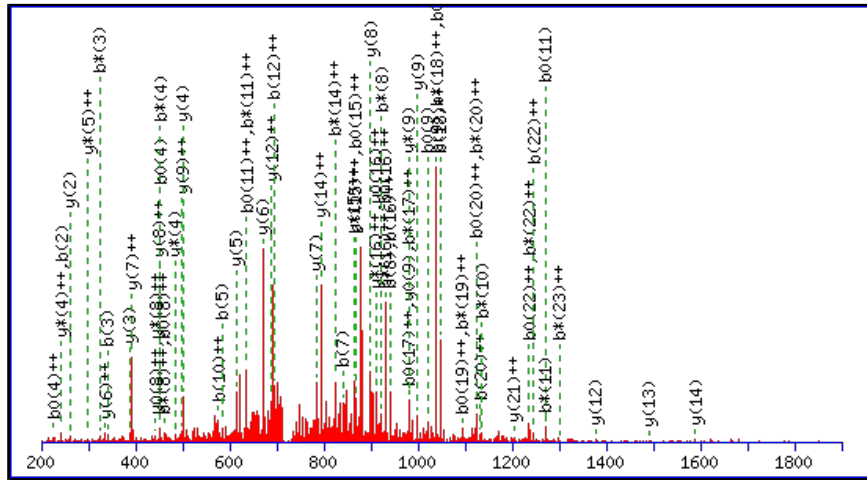

Monoisotopic mass of neutral peptide Mr(calc): 2875.6422

Fixed modifications: Carbamidomethyl (C) (apply to specified residues or termini only)

Variable modifications: N13 : Deamidated (NQ)

Ions Score: 39 Expect: 0.0018

Matches : 69/268 fragment ions using 153 most intense peaks ([help](#))

| #  | b                | b <sup>++</sup>  | b <sup>*</sup>   | b <sup>*++</sup> | b <sup>0</sup>   | b <sup>0++</sup> | Seq. | y                | y <sup>++</sup>  | y <sup>*</sup>  | y <sup>*++</sup> | y <sup>0</sup>  | y <sup>0++</sup> | #  |
|----|------------------|------------------|------------------|------------------|------------------|------------------|------|------------------|------------------|-----------------|------------------|-----------------|------------------|----|
| 1  | 129.0659         | 65.0366          | 112.0393         | 56.5233          |                  |                  | Q    |                  |                  |                 |                  |                 |                  | 25 |
| 2  | <b>242.1499</b>  | 121.5786         | 225.1234         | 113.0653         |                  |                  | L    | 2748.5910        | 1374.7991        | 2731.5644       | 1366.2859        | 2730.5804       | 1365.7938        | 24 |
| 3  | <b>341.2183</b>  | 171.1128         | <b>324.1918</b>  | 162.5995         |                  |                  | V    | 2635.5069        | 1318.2571        | 2618.4804       | 1309.7438        | 2617.4964       | 1309.2518        | 23 |
| 4  | 470.2609         | 235.6341         | <b>453.2344</b>  | 227.1208         | <b>452.2504</b>  | <b>226.6288</b>  | E    | 2536.4385        | 1268.7229        | 2519.4120       | 1260.2096        | 2518.4279       | 1259.7176        | 22 |
| 5  | <b>583.3450</b>  | 292.1761         | 566.3184         | 283.6629         | 565.3344         | 283.1709         | I    | 2407.3959        | <b>1204.2016</b> | 2390.3694       | 1195.6883        | 2389.3853       | 1195.1963        | 21 |
| 6  | 712.3876         | 356.6974         | 695.3610         | 348.1842         | 694.3770         | 347.6921         | E    | 2294.3118        | 1147.6596        | 2277.2853       | 1139.1463        | 2276.3013       | 1138.6543        | 20 |
| 7  | <b>840.4825</b>  | 420.7449         | 823.4560         | 412.2316         | 822.4720         | 411.7396         | K    | 2165.2693        | 1083.1383        | 2148.2427       | 1074.6250        | 2147.2587       | 1074.1330        | 19 |
| 8  | <b>939.5510</b>  | 470.2791         | <b>922.5244</b>  | <b>461.7658</b>  | 921.5404         | <b>461.2738</b>  | V    | 2037.1743        | 1019.0908        | 2020.1477       | 1010.5775        | 2019.1637       | 1010.0855        | 18 |
| 9  | <b>1038.6194</b> | 519.8133         | 1021.5928        | 511.3001         | <b>1020.6088</b> | 510.8080         | V    | 1938.1059        | 969.5566         | 1921.0793       | 961.0433         | 1920.0953       | 960.5513         | 17 |
| 10 | 1151.7034        | <b>576.3554</b>  | <b>1134.6769</b> | 567.8421         | 1133.6929        | 567.3501         | L    | 1839.0375        | 920.0224         | 1822.0109       | <b>911.5091</b>  | 1821.0269       | <b>911.0171</b>  | 16 |
| 11 | 1288.7623        | 644.8848         | <b>1271.7358</b> | <b>636.3715</b>  | <b>1270.7518</b> | <b>635.8795</b>  | H    | 1725.9534        | <b>863.4803</b>  | 1708.9268       | 854.9671         | 1707.9428       | 854.4751         | 15 |
| 12 | 1385.8151        | <b>693.4112</b>  | 1368.7886        | 684.8979         | 1367.8045        | 684.4059         | P    | <b>1588.8945</b> | <b>794.9509</b>  | 1571.8679       | 786.4376         | 1570.8839       | 785.9456         | 14 |
| 13 | 1500.8421        | 750.9247         | 1483.8155        | 742.4114         | 1482.8315        | 741.9194         | N    | <b>1491.8417</b> | 746.4245         | 1474.8152       | 737.9112         | 1473.8312       | 737.4192         | 13 |
| 14 | 1663.9054        | 832.4563         | 1646.8788        | <b>823.9431</b>  | 1645.8948        | 823.4510         | Y    | <b>1376.8148</b> | <b>688.9110</b>  | 1359.7882       | 680.3978         | 1358.8042       | 679.9057         | 12 |
| 15 | 1750.9374        | 875.9723         | 1733.9109        | <b>867.4591</b>  | 1732.9268        | <b>866.9671</b>  | S    | 1213.7515        | 607.3794         | 1196.7249       | 598.8661         | 1195.7409       | 598.3741         | 11 |
| 16 | 1878.9960        | <b>940.0016</b>  | 1861.9694        | <b>931.4884</b>  | 1860.9854        | <b>930.9964</b>  | Q    | 1126.7194        | 563.8633         | 1109.6929       | 555.3501         | 1108.7089       | 554.8581         | 10 |
| 17 | 1978.0644        | 989.5358         | 1961.0379        | <b>981.0226</b>  | 1960.0538        | <b>980.5306</b>  | V    | <b>998.6608</b>  | <b>499.8341</b>  | <b>981.6343</b> | 491.3208         | <b>980.6503</b> | 490.8288         | 9  |
| 18 | 2093.0913        | <b>1047.0493</b> | 2076.0648        | <b>1038.5360</b> | 2075.0808        | <b>1038.0440</b> | D    | <b>899.5924</b>  | <b>450.2999</b>  | 882.5659        | <b>441.7866</b>  | 881.5819        | <b>441.2946</b>  | 8  |
| 19 | 2206.1754        | 1103.5913        | 2189.1489        | <b>1095.0781</b> | 2188.1648        | <b>1094.5861</b> | I    | <b>784.5655</b>  | <b>392.7864</b>  | 767.5389        | 384.2731         |                 |                  | 7  |
| 20 | 2263.1969        | <b>1132.1021</b> | 2246.1703        | <b>1123.5888</b> | 2245.1863        | <b>1123.0968</b> | G    | <b>671.4814</b>  | <b>336.2443</b>  | 654.4549        | 327.7311         |                 |                  | 6  |
| 21 | 2376.2809        | 1188.6441        | 2359.2544        | 1180.1308        | 2358.2704        | 1179.6388        | L    | <b>614.4600</b>  | 307.7336         | 597.4334        | <b>299.2203</b>  |                 |                  | 5  |
| 22 | 2489.3650        | <b>1245.1861</b> | 2472.3385        | <b>1236.6729</b> | 2471.3544        | <b>1236.1809</b> | I    | <b>501.3759</b>  | 251.1916         | <b>484.3493</b> | <b>242.6783</b>  |                 |                  | 4  |
| 23 | 2617.4600        | 1309.2336        | 2600.4334        | <b>1300.7203</b> | 2599.4494        | 1300.2283        | K    | <b>388.2918</b>  | 194.6496         | 371.2653        | 186.1363         |                 |                  | 3  |

|                    |           |           |           |           |           |           |          |                 |          |          |          |  |  |                   |
|--------------------|-----------|-----------|-----------|-----------|-----------|-----------|----------|-----------------|----------|----------|----------|--|--|-------------------|
| <a href="#">24</a> | 2730.5440 | 1365.7757 | 2713.5175 | 1357.2624 | 2712.5335 | 1356.7704 | <b>L</b> | <b>260.1969</b> | 130.6021 | 243.1703 | 122.0888 |  |  | <a href="#">2</a> |
| <a href="#">25</a> |           |           |           |           |           |           | <b>K</b> | 147.1128        | 74.0600  | 130.0863 | 65.5468  |  |  | <a href="#">1</a> |

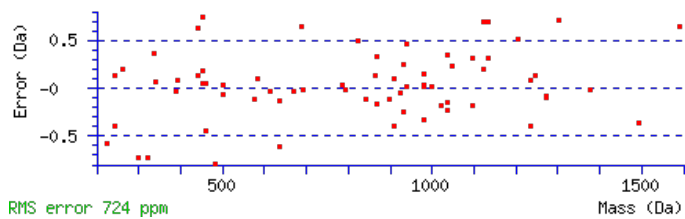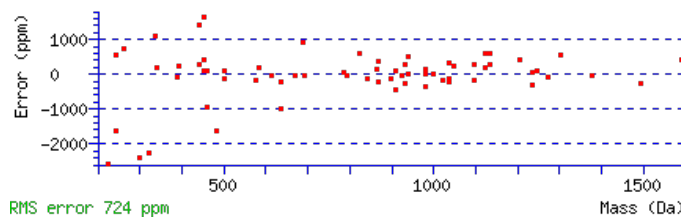

NCBI BLAST search of [QLVEIEKVVLPNYSQVDIGLIKLK](#)  
 (Parameters: blastp, nr protein database, expect=20000, no filter, PAM30)  
 Other BLAST [web gateways](#)

**All matches to this query**

| Score | Mr(calc)  | Delta  | Sequence                                 | Site Analysis         |
|-------|-----------|--------|------------------------------------------|-----------------------|
| 38.8  | 2875.6422 | 0.0053 | <a href="#">QLVEIEKVVLPNYSQVDIGLIKLK</a> | Deamidated N13 53.16% |
| 38.2  | 2875.6422 | 0.0053 | <a href="#">QLVEIEKVVLPNYSQVDIGLIKLK</a> | Deamidated Q16 46.62% |
| 24.1  | 2874.6582 | 0.9893 | <a href="#">QLVEIEKVVLPNYSQVDIGLIKLK</a> |                       |
| 15.0  | 2875.6422 | 0.0053 | <a href="#">QLVEIEKVVLPNYSQVDIGLIKLK</a> | Deamidated Q1 0.23%   |

Mascot: <http://www.matrixscience.com/>

# MASCOT SCIENCE Mascot Search Results

## Peptide View

MS/MS Fragmentation of **MVSHHNLTTGATLINEQWLLTTAKNLFNLHSEENATAK**

Found in **J3QR68** in **con\_Xuniprot\_HUMAN3**, J3QR68\_HUMAN Haptoglobin (Fragment) OS=Homo sapiens GN=HP PE=3 SV=1

Match to Query 28927: 4138.039816 from(1035.517230,4+) intensity(28660.0742) rtinseconds(2638) scans(6921) index(11306)

Title: 111019\_Est\_ISCardio\_NMI\_YS\_G\_7Spectrum5959\_scans\_\_6921

Data file C:\mascot\20140703\_Tmgf\_1D\CSV\_UseAnalysis\MasterCSV\All\_Glyco\mgf\ptm\UC18ERLIC\_PTM\_35D.mgf

Click mouse within plot area to zoom in by factor of two about that point

Or,  to  Da

Label all possible matches  Label matches used for scoring

Show Y-axis

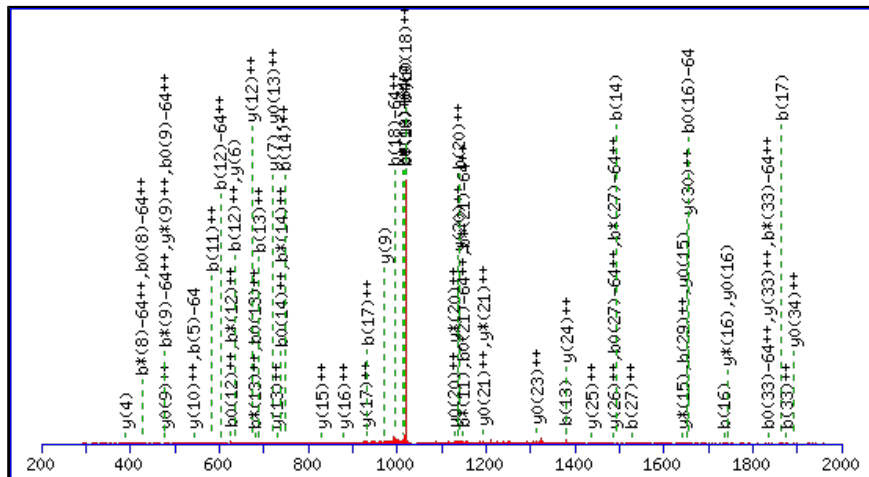

Monoisotopic mass of neutral peptide Mr(calc): 4138.0317

Fixed modifications: Carbamidomethyl (C) (apply to specified residues or termini only)

Variable modifications:

M1 : Oxidation (M), with neutral losses 0.0000 (shown in table), 63.9983

N15 : Deamidated (NQ)

Q17 : Deamidated (NQ)

N25 : Deamidated (NQ)

N33 : Deamidated (NQ)

Ions Score: 36 Expect: 0.065

Matches : 68/616 fragment ions using 102 most intense peaks ([help](#))

| #  | b         | b <sup>++</sup> | b <sup>*</sup> | b <sup>*++</sup> | b <sup>0</sup> | b <sup>0++</sup> | Seq. | y         | y <sup>++</sup> | y <sup>*</sup> | y <sup>*++</sup> | y <sup>0</sup> | y <sup>0++</sup> | #  |
|----|-----------|-----------------|----------------|------------------|----------------|------------------|------|-----------|-----------------|----------------|------------------|----------------|------------------|----|
| 1  | 148.0427  | 74.5250         |                |                  |                |                  | M    |           |                 |                |                  |                |                  | 37 |
| 2  | 247.1111  | 124.0592        |                |                  |                |                  | V    | 3992.0036 | 1996.5054       | 3974.9771      | 1987.9922        | 3973.9930      | 1987.5002        | 36 |
| 3  | 334.1431  | 167.5752        |                |                  | 316.1326       | 158.5699         | S    | 3892.9352 | 1946.9712       | 3875.9086      | 1938.4580        | 3874.9246      | 1937.9660        | 35 |
| 4  | 471.2020  | 236.1047        |                |                  | 453.1915       | 227.0994         | H    | 3805.9032 | 1903.4552       | 3788.8766      | 1894.9419        | 3787.8926      | 1894.4499        | 34 |
| 5  | 608.2609  | 304.6341        |                |                  | 590.2504       | 295.6288         | H    | 3668.8443 | 1834.9258       | 3651.8177      | 1826.4125        | 3650.8337      | 1825.9205        | 33 |
| 6  | 722.3039  | 361.6556        | 705.2773       | 353.1423         | 704.2933       | 352.6503         | N    | 3531.7853 | 1766.3963       | 3514.7588      | 1757.8830        | 3513.7748      | 1757.3910        | 32 |
| 7  | 835.3879  | 418.1976        | 818.3614       | 409.6843         | 817.3774       | 409.1923         | L    | 3417.7424 | 1709.3748       | 3400.7159      | 1700.8616        | 3399.7318      | 1700.3696        | 31 |
| 8  | 936.4356  | 468.7214        | 919.4091       | 460.2082         | 918.4250       | 459.7162         | T    | 3304.6583 | 1652.8328       | 3287.6318      | 1644.3195        | 3286.6478      | 1643.8275        | 30 |
| 9  | 1037.4833 | 519.2453        | 1020.4567      | 510.7320         | 1019.4727      | 510.2400         | T    | 3203.6107 | 1602.3090       | 3186.5841      | 1593.7957        | 3185.6001      | 1593.3037        | 29 |
| 10 | 1094.5048 | 547.7560        | 1077.4782      | 539.2427         | 1076.4942      | 538.7507         | G    | 3102.5630 | 1551.7851       | 3085.5364      | 1543.2719        | 3084.5524      | 1542.7799        | 28 |
| 11 | 1165.5419 | 583.2746        | 1148.5153      | 574.7613         | 1147.5313      | 574.2693         | A    | 3045.5415 | 1523.2744       | 3028.5150      | 1514.7611        | 3027.5310      | 1514.2691        | 27 |
| 12 | 1266.5895 | 633.7984        | 1249.5630      | 625.2851         | 1248.5790      | 624.7931         | T    | 2974.5044 | 1487.7558       | 2957.4779      | 1479.2426        | 2956.4938      | 1478.7506        | 26 |
| 13 | 1379.6736 | 690.3404        | 1362.6471      | 681.8272         | 1361.6630      | 681.3352         | L    | 2873.4567 | 1437.2320       | 2856.4302      | 1428.7187        | 2855.4462      | 1428.2267        | 25 |
| 14 | 1492.7577 | 746.8825        | 1475.7311      | 738.3692         | 1474.7471      | 737.8772         | I    | 2760.3727 | 1380.6900       | 2743.3461      | 1372.1767        | 2742.3621      | 1371.6847        | 24 |
| 15 | 1607.7846 | 804.3959        | 1590.7581      | 795.8827         | 1589.7741      | 795.3907         | N    | 2647.2886 | 1324.1479       | 2630.2621      | 1315.6347        | 2629.2780      | 1315.1427        | 23 |
| 16 | 1736.8272 | 868.9172        | 1719.8007      | 860.4040         | 1718.8166      | 859.9120         | E    | 2532.2617 | 1266.6345       | 2515.2351      | 1258.1212        | 2514.2511      | 1257.6292        | 22 |
| 17 | 1865.8698 | 933.4385        | 1848.8433      | 924.9253         | 1847.8592      | 924.4333         | Q    | 2403.2191 | 1202.1132       | 2386.1925      | 1193.5999        | 2385.2085      | 1193.1079        | 21 |
| 18 | 2051.9491 | 1026.4782       | 2034.9226      | 1017.9649        | 2033.9386      | 1017.4729        | W    | 2274.1765 | 1137.5919       | 2257.1499      | 1129.0786        | 2256.1659      | 1128.5866        | 20 |
| 19 | 2165.0332 | 1083.0202       | 2148.0066      | 1074.5070        | 2147.0226      | 1074.0149        | L    | 2088.0972 | 1044.5522       | 2071.0706      | 1036.0389        | 2070.0866      | 1035.5469        | 19 |
| 20 | 2278.1172 | 1139.5623       | 2261.0907      | 1131.0490        | 2260.1067      | 1130.5570        | L    | 1975.0131 | 988.0102        | 1957.9865      | 979.4969         | 1957.0025      | 979.0049         | 18 |
| 21 | 2379.1649 | 1190.0861       | 2362.1384      | 1181.5728        | 2361.1544      | 1181.0808        | T    | 1861.9290 | 931.4682        | 1844.9025      | 922.9549         | 1843.9185      | 922.4629         | 17 |

|    |           |           |           |           |           |           |   |           |          |           |          |           |          |    |
|----|-----------|-----------|-----------|-----------|-----------|-----------|---|-----------|----------|-----------|----------|-----------|----------|----|
| 22 | 2480.2126 | 1240.6099 | 2463.1861 | 1232.0967 | 2462.2020 | 1231.6047 | T | 1760.8814 | 880.9443 | 1743.8548 | 872.4310 | 1742.8708 | 871.9390 | 16 |
| 23 | 2551.2497 | 1276.1285 | 2534.2232 | 1267.6152 | 2533.2392 | 1267.1232 | A | 1659.8337 | 830.4205 | 1642.8071 | 821.9072 | 1641.8231 | 821.4152 | 15 |
| 24 | 2679.3447 | 1340.1760 | 2662.3181 | 1331.6627 | 2661.3341 | 1331.1707 | K | 1588.7966 | 794.9019 | 1571.7700 | 786.3886 | 1570.7860 | 785.8966 | 14 |
| 25 | 2794.3716 | 1397.6895 | 2777.3451 | 1389.1762 | 2776.3611 | 1388.6842 | N | 1460.7016 | 730.8544 | 1443.6750 | 722.3412 | 1442.6910 | 721.8492 | 13 |
| 26 | 2907.4557 | 1454.2315 | 2890.4291 | 1445.7182 | 2889.4451 | 1445.2262 | L | 1345.6747 | 673.3410 | 1328.6481 | 664.8277 | 1327.6641 | 664.3357 | 12 |
| 27 | 3054.5241 | 1527.7657 | 3037.4976 | 1519.2524 | 3036.5135 | 1518.7604 | F | 1232.5906 | 616.7989 | 1215.5640 | 608.2857 | 1214.5800 | 607.7937 | 11 |
| 28 | 3167.6082 | 1584.3077 | 3150.5816 | 1575.7944 | 3149.5976 | 1575.3024 | L | 1085.5222 | 543.2647 | 1068.4956 | 534.7515 | 1067.5116 | 534.2594 | 10 |
| 29 | 3281.6511 | 1641.3292 | 3264.6245 | 1632.8159 | 3263.6405 | 1632.3239 | N | 972.4381  | 486.7227 | 955.4116  | 478.2094 | 954.4275  | 477.7174 | 9  |
| 30 | 3418.7100 | 1709.8586 | 3401.6835 | 1701.3454 | 3400.6994 | 1700.8534 | H | 858.3952  | 429.7012 | 841.3686  | 421.1880 | 840.3846  | 420.6959 | 8  |
| 31 | 3505.7420 | 1753.3747 | 3488.7155 | 1744.8614 | 3487.7315 | 1744.3694 | S | 721.3363  | 361.1718 | 704.3097  | 352.6585 | 703.3257  | 352.1665 | 7  |
| 32 | 3634.7846 | 1817.8960 | 3617.7581 | 1809.3827 | 3616.7741 | 1808.8907 | E | 634.3042  | 317.6558 | 617.2777  | 309.1425 | 616.2937  | 308.6505 | 6  |
| 33 | 3749.8116 | 1875.4094 | 3732.7850 | 1866.8961 | 3731.8010 | 1866.4041 | N | 505.2617  | 253.1345 | 488.2351  | 244.6212 | 487.2511  | 244.1292 | 5  |
| 34 | 3820.8487 | 1910.9280 | 3803.8221 | 1902.4147 | 3802.8381 | 1901.9227 | A | 390.2347  | 195.6210 | 373.2082  | 187.1077 | 372.2241  | 186.6157 | 4  |
| 35 | 3921.8964 | 1961.4518 | 3904.8698 | 1952.9385 | 3903.8858 | 1952.4465 | T | 319.1976  | 160.1024 | 302.1710  | 151.5892 | 301.1870  | 151.0972 | 3  |
| 36 | 3992.9335 | 1996.9704 | 3975.9069 | 1988.4571 | 3974.9229 | 1987.9651 | A | 218.1499  | 109.5786 | 201.1234  | 101.0653 |           |          | 2  |
| 37 |           |           |           |           |           |           | K | 147.1128  | 74.0600  | 130.0863  | 65.5468  |           |          | 1  |

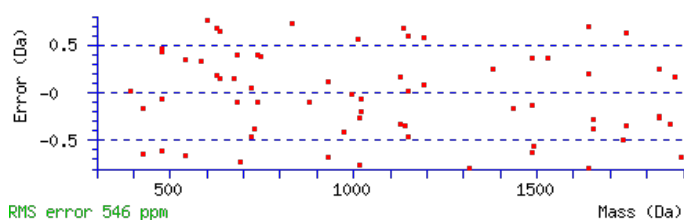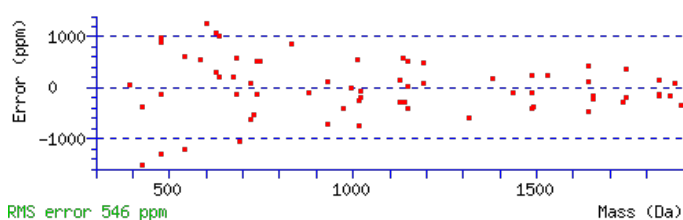

NCBI BLAST search of [MVSHHNLTGATLINEQWLLTTAKNLFNHSENATAK](#)

(Parameters: blastp, nr protein database, expect=20000, no filter, PAM30)

Other BLAST [web gateways](#)

All matches to this query

| Score | Mr(calc)  | Delta  | Sequence                                            |
|-------|-----------|--------|-----------------------------------------------------|
| 35.5  | 4138.0317 | 0.0082 | <a href="#">MVSHHNLTGATLINEQWLLTTAKNLFNHSENATAK</a> |
| 34.9  | 4137.0477 | 0.9922 | <a href="#">MVSHHNLTGATLINEQWLLTTAKNLFNHSENATAK</a> |
| 34.4  | 4138.0317 | 0.0082 | <a href="#">MVSHHNLTGATLINEQWLLTTAKNLFNHSENATAK</a> |
| 28.3  | 4138.0317 | 0.0082 | <a href="#">MVSHHNLTGATLINEQWLLTTAKNLFNHSENATAK</a> |
| 28.3  | 4138.0317 | 0.0082 | <a href="#">MVSHHNLTGATLINEQWLLTTAKNLFNHSENATAK</a> |
| 26.9  | 4138.0317 | 0.0082 | <a href="#">MVSHHNLTGATLINEQWLLTTAKNLFNHSENATAK</a> |
| 26.5  | 4137.0477 | 0.9922 | <a href="#">MVSHHNLTGATLINEQWLLTTAKNLFNHSENATAK</a> |
| 26.0  | 4137.0477 | 0.9922 | <a href="#">MVSHHNLTGATLINEQWLLTTAKNLFNHSENATAK</a> |
| 25.9  | 4138.0317 | 0.0082 | <a href="#">MVSHHNLTGATLINEQWLLTTAKNLFNHSENATAK</a> |
| 25.1  | 4138.0317 | 0.0082 | <a href="#">MVSHHNLTGATLINEQWLLTTAKNLFNHSENATAK</a> |

Mascot: <http://www.matrixscience.com/>

# MATRIX SCIENCE Mascot Search Results

## Peptide View

MS/MS Fragmentation of **MVSHHNLTTGATLINEQWLLTTAK**

Found in **J3QR68** in **con\_Xuniprot\_HUMAN3**, J3QR68\_HUMAN Haptoglobin (Fragment) OS=Homo sapiens GN=HP PE=3 SV=1

Match to Query 23817: 2682.357056 from(671.596540,4+) intensity(11205.3682) rtinseconds(1766) scans(4433) index(25378)

Title: 111019\_Est\_MI\_YS\_G\_07Spectrum3783\_scans\_\_4433

Data file C:\mascot\20140703\_Tmgf\_1D\CSV\_UseAnalysis\MasterCSV\All\_Glyco\mgf\ptm\UC18ERLIC\_PTM\_35D.mgf

Click mouse within plot area to zoom in by factor of two about that point

Or, to Da

Label all possible matches Label matches used for scoring

Show Y-axis

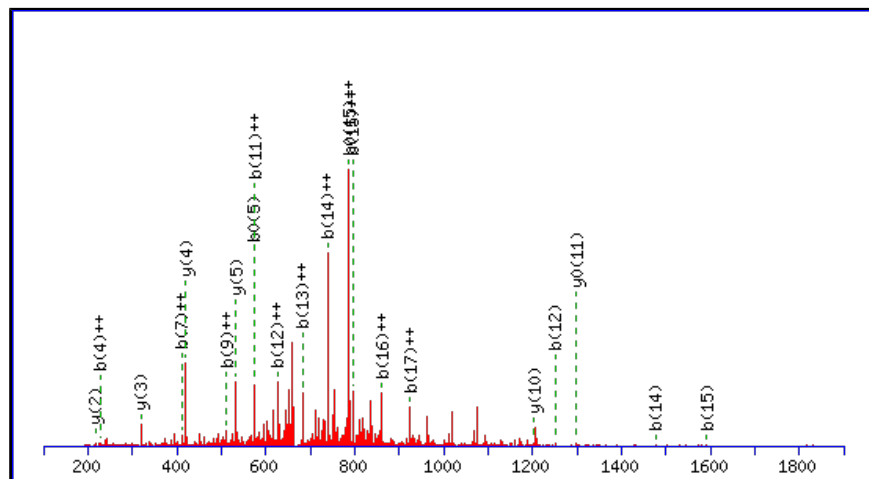

Monoisotopic mass of neutral peptide Mr(calc): 2680.3530

Fixed modifications: Carbamidomethyl (C) (apply to specified residues or termini only)

Variable modifications:

N6 : Deamidated (NQ)

Q17 : Deamidated (NQ)

Ions Score: 35 Expect: 0.075

Matches : 21/258 fragment ions using 58 most intense peaks ([help](#))

| #  | b                | b <sup>++</sup> | b <sup>*</sup> | b <sup>*++</sup> | b <sup>0</sup>  | b <sup>0++</sup> | Seq. | y                | y <sup>++</sup> | y <sup>*</sup> | y <sup>*++</sup> | y <sup>0</sup>   | y <sup>0++</sup> | #  |
|----|------------------|-----------------|----------------|------------------|-----------------|------------------|------|------------------|-----------------|----------------|------------------|------------------|------------------|----|
| 1  | 132.0478         | 66.5275         |                |                  |                 |                  | M    |                  |                 |                |                  |                  |                  | 24 |
| 2  | 231.1162         | 116.0617        |                |                  |                 |                  | V    | 2550.3198        | 1275.6636       | 2533.2933      | 1267.1503        | 2532.3093        | 1266.6583        | 23 |
| 3  | 318.1482         | 159.5777        |                |                  | 300.1376        | 150.5725         | S    | 2451.2514        | 1226.1294       | 2434.2249      | 1217.6161        | 2433.2409        | 1217.1241        | 22 |
| 4  | 455.2071         | <b>228.1072</b> |                |                  | 437.1966        | 219.1019         | H    | 2364.2194        | 1182.6133       | 2347.1929      | 1174.1001        | 2346.2088        | 1173.6081        | 21 |
| 5  | 592.2660         | 296.6367        |                |                  | <b>574.2555</b> | 287.6314         | H    | 2227.1605        | 1114.0839       | 2210.1339      | 1105.5706        | 2209.1499        | 1105.0786        | 20 |
| 6  | 707.2930         | 354.1501        | 690.2664       | 345.6368         | 689.2824        | 345.1448         | N    | 2090.1016        | 1045.5544       | 2073.0750      | 1037.0412        | 2072.0910        | 1036.5491        | 19 |
| 7  | 820.3770         | <b>410.6922</b> | 803.3505       | 402.1789         | 802.3665        | 401.6869         | L    | 1975.0746        | 988.0410        | 1958.0481      | 979.5277         | 1957.0641        | 979.0357         | 18 |
| 8  | 921.4247         | 461.2160        | 904.3982       | 452.7027         | 903.4141        | 452.2107         | T    | 1861.9906        | 931.4989        | 1844.9640      | 922.9857         | 1843.9800        | 922.4936         | 17 |
| 9  | 1022.4724        | <b>511.7398</b> | 1005.4458      | 503.2266         | 1004.4618       | 502.7346         | T    | 1760.9429        | 880.9751        | 1743.9163      | 872.4618         | 1742.9323        | 871.9698         | 16 |
| 10 | 1079.4939        | 540.2506        | 1062.4673      | 531.7373         | 1061.4833       | 531.2453         | G    | 1659.8952        | 830.4512        | 1642.8687      | 821.9380         | 1641.8847        | 821.4460         | 15 |
| 11 | 1150.5310        | <b>575.7691</b> | 1133.5044      | 567.2558         | 1132.5204       | 566.7638         | A    | 1602.8738        | 801.9405        | 1585.8472      | 793.4272         | 1584.8632        | 792.9352         | 14 |
| 12 | <b>1251.5786</b> | <b>626.2930</b> | 1234.5521      | 617.7797         | 1233.5681       | 617.2877         | T    | 1531.8366        | 766.4220        | 1514.8101      | 757.9087         | 1513.8261        | 757.4167         | 13 |
| 13 | 1364.6627        | <b>682.8350</b> | 1347.6362      | 674.3217         | 1346.6521       | 673.8297         | L    | 1430.7890        | 715.8981        | 1413.7624      | 707.3848         | 1412.7784        | 706.8928         | 12 |
| 14 | <b>1477.7468</b> | <b>739.3770</b> | 1460.7202      | 730.8638         | 1459.7362       | 730.3717         | I    | 1317.7049        | 659.3561        | 1300.6783      | 650.8428         | <b>1299.6943</b> | 650.3508         | 11 |
| 15 | <b>1591.7897</b> | <b>796.3985</b> | 1574.7632      | 787.8852         | 1573.7791       | <b>787.3932</b>  | N    | <b>1204.6208</b> | 602.8141        | 1187.5943      | 594.3008         | 1186.6103        | 593.8088         | 10 |
| 16 | 1720.8323        | <b>860.9198</b> | 1703.8057      | 852.4065         | 1702.8217       | 851.9145         | E    | 1090.5779        | 545.7926        | 1073.5514      | 537.2793         | 1072.5673        | 536.7873         | 9  |
| 17 | 1849.8749        | <b>925.4411</b> | 1832.8483      | 916.9278         | 1831.8643       | 916.4358         | Q    | 961.5353         | 481.2713        | 944.5088       | 472.7580         | 943.5247         | 472.2660         | 8  |
| 18 | 2035.9542        | 1018.4807       | 2018.9277      | 1009.9675        | 2017.9436       | 1009.4755        | W    | 832.4927         | 416.7500        | 815.4662       | 408.2367         | 814.4822         | 407.7447         | 7  |
| 19 | 2149.0383        | 1075.0228       | 2132.0117      | 1066.5095        | 2131.0277       | 1066.0175        | L    | 646.4134         | 323.7103        | 629.3869       | 315.1971         | 628.4028         | 314.7051         | 6  |
| 20 | 2262.1223        | 1131.5648       | 2245.0958      | 1123.0515        | 2244.1118       | 1122.5595        | L    | <b>533.3293</b>  | 267.1683        | 516.3028       | 258.6550         | 515.3188         | 258.1630         | 5  |
| 21 | 2363.1700        | 1182.0886       | 2346.1435      | 1173.5754        | 2345.1594       | 1173.0834        | T    | <b>420.2453</b>  | 210.6263        | 403.2187       | 202.1130         | 402.2347         | 201.6210         | 4  |
| 22 | 2464.2177        | 1232.6125       | 2447.1911      | 1224.0992        | 2446.2071       | 1223.6072        | T    | <b>319.1976</b>  | 160.1024        | 302.1710       | 151.5892         | 301.1870         | 151.0972         | 3  |

|    |           |           |           |           |           |           |   |          |          |          |          |  |  |   |
|----|-----------|-----------|-----------|-----------|-----------|-----------|---|----------|----------|----------|----------|--|--|---|
| 23 | 2535.2548 | 1268.1310 | 2518.2283 | 1259.6178 | 2517.2442 | 1259.1258 | A | 218.1499 | 109.5786 | 201.1234 | 101.0653 |  |  | 2 |
| 24 |           |           |           |           |           |           | K | 147.1128 | 74.0600  | 130.0863 | 65.5468  |  |  | 1 |

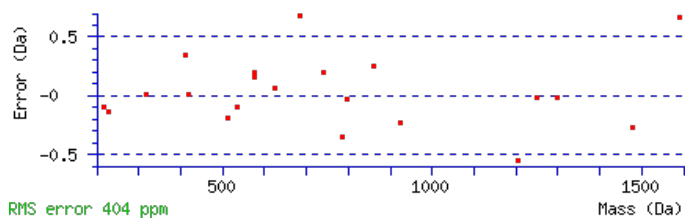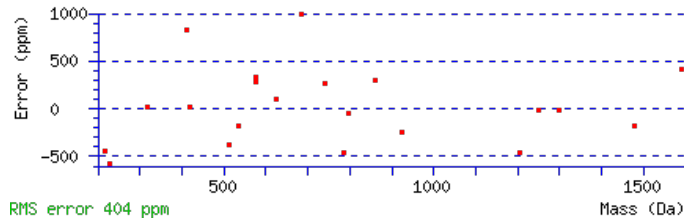

NCBI BLAST search of [MVSHHNLTTGATLINEQWLLTTAK](#)  
 (Parameters: blastp, nr protein database, expect=20000, no filter, PAM30)  
 Other BLAST [web gateways](#)

**All matches to this query**

| Score | Mr(calc)  | Delta   | Sequence                                       |
|-------|-----------|---------|------------------------------------------------|
| 35.1  | 2680.3530 | 2.0040  | <a href="#">MVSHHNLTTGATLINEQWLLTTAK</a>       |
| 32.6  | 2680.3530 | 2.0040  | <a href="#">MVSHHNLTTGATLINEQWLLTTAK</a>       |
| 16.3  | 2680.3530 | 2.0040  | <a href="#">MVSHHNLTTGATLINEQWLLTTAK</a>       |
| 7.6   | 2681.3557 | 1.0014  | <a href="#">LGSNGRIMVMHSELLIEPFSPQLP</a>       |
| 7.0   | 2681.3557 | 1.0014  | <a href="#">LGSNGRIMVMHSELLIEPFSPQLP</a>       |
| 6.1   | 2681.3522 | 1.0049  | <a href="#">GPQGPGSVAAGLGRVLLVAGHAGGDQGGEP</a> |
| 5.9   | 2681.3537 | 1.0034  | <a href="#">GGLTSPNCAHAVAGLWFKRYYSVK</a>       |
| 3.9   | 2680.3456 | 2.0115  | <a href="#">EHVQNNLPRDLLTGEQFIQLRR</a>         |
| 3.7   | 2682.3588 | -0.0017 | <a href="#">AAAEMVIKGVATNGTYFIHDFRQK</a>       |
| 3.7   | 2681.3602 | 0.9969  | <a href="#">IRYATTEWAYQTNGAWAGLLLLN</a>        |

Mascot: <http://www.matrixscience.com/>



# MASCOT SCIENCE Mascot Search Results

## Peptide View

MS/MS Fragmentation of **MVSHHNLTTGATLINEQWLLTTAKNLFNLHSEENATAK**

Found in **J3QR68** in **con\_Xuniprot\_HUMAN3**, J3QR68\_HUMAN Haptoglobin (Fragment) OS=Homo sapiens GN=HP PE=3 SV=1

Match to Query 28645: 4123.067736 from(1031.774210,4+) intensity(45276.7148) rtinseconds(2549) scans(6743) index(9809)

Title: 111019\_Est\_ISCardio\_NMI\_YS\_G\_5Spectrum5839\_scans\_\_6743

Data file C:\mascot\20140703\_Tmgf\_1D\CSV\_UseAnalysis\MasterCSV\All\_Glyco\mgf\ptm\UC18ERLIC\_PTM\_35D.mgf

Click mouse within plot area to zoom in by factor of two about that point

Or, to Da

Label all possible matches Label matches used for scoring

Show Y-axis

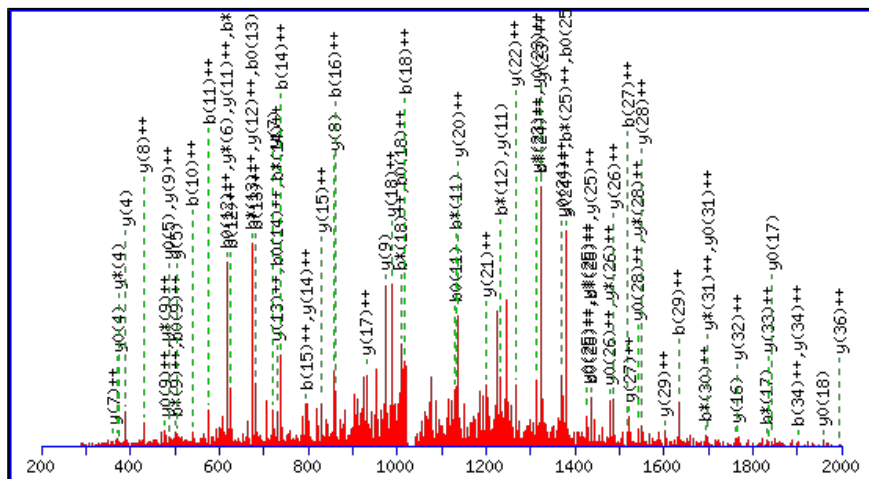

Monoisotopic mass of neutral peptide Mr(calc): 4121.0527

Fixed modifications: Carbamidomethyl (C) (apply to specified residues or termini only)

Variable modifications:

N25 : Deamidated (NQ)

N29 : Deamidated (NQ)

N33 : Deamidated (NQ)

Ions Score: 142 Expect: 1.3e-012

Matches : 81/414 fragment ions using 104 most intense peaks (help)

| #  | b         | b <sup>++</sup>  | b <sup>*</sup>   | b <sup>*++</sup> | b <sup>0</sup>   | b <sup>0++</sup> | Seq.     | y                | y <sup>++</sup>  | y <sup>*</sup> | y <sup>*++</sup> | y <sup>0</sup>   | y <sup>0++</sup> | #         |
|----|-----------|------------------|------------------|------------------|------------------|------------------|----------|------------------|------------------|----------------|------------------|------------------|------------------|-----------|
| 1  | 132.0478  | 66.5275          |                  |                  |                  |                  | <b>M</b> |                  |                  |                |                  |                  |                  | <b>37</b> |
| 2  | 231.1162  | 116.0617         |                  |                  |                  |                  | <b>V</b> | 3991.0196        | <b>1996.0134</b> | 3973.9930      | 1987.5002        | 3973.0090        | 1987.0081        | <b>36</b> |
| 3  | 318.1482  | 159.5777         |                  |                  | 300.1376         | 150.5725         | <b>S</b> | 3891.9512        | 1946.4792        | 3874.9246      | 1937.9660        | 3873.9406        | 1937.4739        | <b>35</b> |
| 4  | 455.2071  | 228.1072         |                  |                  | 437.1966         | 219.1019         | <b>H</b> | 3804.9191        | <b>1902.9632</b> | 3787.8926      | 1894.4499        | 3786.9086        | 1893.9579        | <b>34</b> |
| 5  | 592.2660  | 296.6367         |                  |                  | 574.2555         | 287.6314         | <b>H</b> | 3667.8602        | <b>1834.4338</b> | 3650.8337      | 1825.9205        | 3649.8497        | 1825.4285        | <b>33</b> |
| 6  | 706.3090  | 353.6581         | 689.2824         | 345.1448         | 688.2984         | 344.6528         | <b>N</b> | 3530.8013        | <b>1765.9043</b> | 3513.7748      | 1757.3910        | 3512.7908        | 1756.8990        | <b>32</b> |
| 7  | 819.3930  | 410.2001         | 802.3665         | 401.6869         | 801.3825         | 401.1949         | <b>L</b> | 3416.7584        | 1708.8828        | 3399.7318      | <b>1700.3696</b> | 3398.7478        | <b>1699.8776</b> | <b>31</b> |
| 8  | 920.4407  | 460.7240         | 903.4141         | 452.2107         | 902.4301         | 451.7187         | <b>T</b> | 3303.6743        | 1652.3408        | 3286.6478      | 1643.8275        | 3285.6638        | 1643.3355        | <b>30</b> |
| 9  | 1021.4884 | 511.2478         | 1004.4618        | <b>502.7346</b>  | 1003.4778        | <b>502.2425</b>  | <b>T</b> | 3202.6267        | <b>1601.8170</b> | 3185.6001      | 1593.3037        | 3184.6161        | 1592.8117        | <b>29</b> |
| 10 | 1078.5098 | <b>539.7586</b>  | 1061.4833        | 531.2453         | 1060.4993        | 530.7533         | <b>G</b> | 3101.5790        | <b>1551.2931</b> | 3084.5524      | <b>1542.7799</b> | 3083.5684        | <b>1542.2878</b> | <b>28</b> |
| 11 | 1149.5470 | <b>575.2771</b>  | <b>1132.5204</b> | 566.7638         | <b>1131.5364</b> | 566.2718         | <b>A</b> | 3044.5575        | <b>1522.7824</b> | 3027.5310      | 1514.2691        | 3026.5469        | 1513.7771        | <b>27</b> |
| 12 | 1250.5946 | <b>625.8010</b>  | <b>1233.5681</b> | <b>617.2877</b>  | 1232.5841        | <b>616.7957</b>  | <b>T</b> | 2973.5204        | <b>1487.2638</b> | 2956.4938      | <b>1478.7506</b> | 2955.5098        | <b>1478.2586</b> | <b>26</b> |
| 13 | 1363.6787 | <b>682.3430</b>  | 1346.6521        | <b>673.8297</b>  | 1345.6681        | <b>673.3377</b>  | <b>L</b> | 2872.4727        | <b>1436.7400</b> | 2855.4462      | <b>1428.2267</b> | 2854.4622        | <b>1427.7347</b> | <b>25</b> |
| 14 | 1476.7628 | <b>738.8850</b>  | 1459.7362        | <b>730.3717</b>  | 1458.7522        | <b>729.8797</b>  | <b>I</b> | 2759.3887        | <b>1380.1980</b> | 2742.3621      | 1371.6847        | 2741.3781        | <b>1371.1927</b> | <b>24</b> |
| 15 | 1590.8057 | <b>795.9065</b>  | 1573.7791        | 787.3932         | 1572.7951        | 786.9012         | <b>N</b> | 2646.3046        | <b>1323.6559</b> | 2629.2780      | <b>1315.1427</b> | 2628.2940        | <b>1314.6506</b> | <b>23</b> |
| 16 | 1719.8483 | <b>860.4278</b>  | 1702.8217        | 851.9145         | 1701.8377        | 851.4225         | <b>E</b> | 2532.2617        | <b>1266.6345</b> | 2515.2351      | 1258.1212        | 2514.2511        | 1257.6292        | <b>22</b> |
| 17 | 1847.9069 | 924.4571         | <b>1830.8803</b> | 915.9438         | 1829.8963        | 915.4518         | <b>Q</b> | 2403.2191        | <b>1202.1132</b> | 2386.1925      | 1193.5999        | 2385.2085        | 1193.1079        | <b>21</b> |
| 18 | 2033.9862 | <b>1017.4967</b> | 2016.9596        | <b>1008.9834</b> | 2015.9756        | <b>1008.4914</b> | <b>W</b> | 2275.1605        | <b>1138.0839</b> | 2258.1339      | 1129.5706        | 2257.1499        | 1129.0786        | <b>20</b> |
| 19 | 2147.0702 | 1074.0388        | 2130.0437        | 1065.5255        | 2129.0597        | 1065.0335        | <b>L</b> | 2089.0812        | 1045.0442        | 2072.0546      | 1036.5310        | 2071.0706        | 1036.0389        | <b>19</b> |
| 20 | 2260.1543 | 1130.5808        | 2243.1278        | 1122.0675        | 2242.1437        | 1121.5755        | <b>L</b> | 1975.9971        | <b>988.5022</b>  | 1958.9706      | 979.9889         | <b>1957.9865</b> | 979.4969         | <b>18</b> |
| 21 | 2361.2020 | 1181.1046        | 2344.1754        | 1172.5914        | 2343.1914        | 1172.0993        | <b>T</b> | 1862.9131        | <b>931.9602</b>  | 1845.8865      | 923.4469         | <b>1844.9025</b> | 922.9549         | <b>17</b> |
| 22 | 2462.2497 | 1231.6285        | 2445.2231        | 1223.1152        | 2444.2391        | 1222.6232        | <b>T</b> | <b>1761.8654</b> | 881.4363         | 1744.8388      | 872.9230         | 1743.8548        | 872.4310         | <b>16</b> |



|    |           |           |           |           |           |           |   |           |          |           |          |           |          |    |
|----|-----------|-----------|-----------|-----------|-----------|-----------|---|-----------|----------|-----------|----------|-----------|----------|----|
| 23 | 2533.2868 | 1267.1470 | 2516.2602 | 1258.6337 | 2515.2762 | 1258.1417 | A | 1660.8177 | 830.9125 | 1643.7911 | 822.3992 | 1642.8071 | 821.9072 | 15 |
| 24 | 2661.3817 | 1331.1945 | 2644.3552 | 1322.6812 | 2643.3712 | 1322.1892 | K | 1589.7806 | 795.3939 | 1572.7540 | 786.8807 | 1571.7700 | 786.3886 | 14 |
| 25 | 2776.4087 | 1388.7080 | 2759.3821 | 1380.1947 | 2758.3981 | 1379.7027 | N | 1461.6856 | 731.3464 | 1444.6591 | 722.8332 | 1443.6751 | 722.3412 | 13 |
| 26 | 2889.4927 | 1445.2500 | 2872.4662 | 1436.7367 | 2871.4822 | 1436.2447 | L | 1346.6587 | 673.8330 | 1329.6321 | 665.3197 | 1328.6481 | 664.8277 | 12 |
| 27 | 3036.5612 | 1518.7842 | 3019.5346 | 1510.2709 | 3018.5506 | 1509.7789 | F | 1233.5746 | 617.2909 | 1216.5481 | 608.7777 | 1215.5640 | 608.2857 | 11 |
| 28 | 3149.6452 | 1575.3262 | 3132.6187 | 1566.8130 | 3131.6347 | 1566.3210 | L | 1086.5062 | 543.7567 | 1069.4796 | 535.2435 | 1068.4956 | 534.7515 | 10 |
| 29 | 3264.6722 | 1632.8397 | 3247.6456 | 1624.3264 | 3246.6616 | 1623.8344 | N | 973.4221  | 487.2147 | 956.3956  | 478.7014 | 955.4116  | 478.2094 | 9  |
| 30 | 3401.7311 | 1701.3692 | 3384.7045 | 1692.8559 | 3383.7205 | 1692.3639 | H | 858.3952  | 429.7012 | 841.3686  | 421.1880 | 840.3846  | 420.6959 | 8  |
| 31 | 3488.7631 | 1744.8852 | 3471.7366 | 1736.3719 | 3470.7525 | 1735.8799 | S | 721.3363  | 361.1718 | 704.3097  | 352.6585 | 703.3257  | 352.1665 | 7  |
| 32 | 3617.8057 | 1809.4065 | 3600.7791 | 1800.8932 | 3599.7951 | 1800.4012 | E | 634.3042  | 317.6558 | 617.2777  | 309.1425 | 616.2937  | 308.6505 | 6  |
| 33 | 3732.8326 | 1866.9200 | 3715.8061 | 1858.4067 | 3714.8221 | 1857.9147 | N | 505.2617  | 253.1345 | 488.2351  | 244.6212 | 487.2511  | 244.1292 | 5  |
| 34 | 3803.8698 | 1902.4385 | 3786.8432 | 1893.9252 | 3785.8592 | 1893.4332 | A | 390.2347  | 195.6210 | 373.2082  | 187.1077 | 372.2241  | 186.6157 | 4  |
| 35 | 3904.9174 | 1952.9624 | 3887.8909 | 1944.4491 | 3886.9069 | 1943.9571 | T | 319.1976  | 160.1024 | 302.1710  | 151.5892 | 301.1870  | 151.0972 | 3  |
| 36 | 3975.9545 | 1988.4809 | 3958.9280 | 1979.9676 | 3957.9440 | 1979.4756 | A | 218.1499  | 109.5786 | 201.1234  | 101.0653 |           |          | 2  |
| 37 |           |           |           |           |           |           | K | 147.1128  | 74.0600  | 130.0863  | 65.5468  |           |          | 1  |

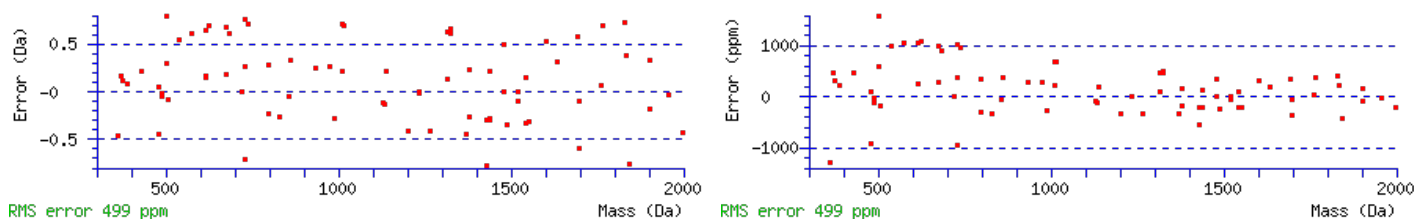

NCBI BLAST search of [MVSHHNLTTGATLINEQWLLTTAKNLFNLHSENATAK](#)

(Parameters: blastp, nr protein database, expect=20000, no filter, PAM30)

Other BLAST [web gateways](#)

All matches to this query

| Score | Mr(calc)  | Delta  | Sequence                                              | Site Analysis                   |
|-------|-----------|--------|-------------------------------------------------------|---------------------------------|
| 142.0 | 4121.0527 | 2.0150 | <a href="#">MVSHHNLTTGATLINEQWLLTTAKNLFNLHSENATAK</a> | Deamidated N25, N29, N33 98.23% |
| 124.4 | 4121.0527 | 2.0150 | <a href="#">MVSHHNLTTGATLINEQWLLTTAKNLFNLHSENATAK</a> | Deamidated N6, N29, N33 1.72%   |
| 107.7 | 4121.0527 | 2.0150 | <a href="#">MVSHHNLTTGATLINEQWLLTTAKNLFNLHSENATAK</a> | Deamidated Q17, N25, N29 0.04%  |
| 103.9 | 4121.0527 | 2.0150 | <a href="#">MVSHHNLTTGATLINEQWLLTTAKNLFNLHSENATAK</a> | Deamidated N6, N15, N33 0.02%   |
| 68.7  | 4121.0527 | 2.0150 | <a href="#">MVSHHNLTTGATLINEQWLLTTAKNLFNLHSENATAK</a> | Deamidated N6, N15, Q17 0.00%   |
| 61.6  | 4121.0527 | 2.0150 | <a href="#">MVSHHNLTTGATLINEQWLLTTAKNLFNLHSENATAK</a> | Deamidated N15, Q17, N25 0.00%  |
| 15.7  | 4121.0676 | 2.0002 | <a href="#">VMLENFRNLVFLGIDVSKPDLITCLEQGKDPWNMK</a>   |                                 |
| 11.1  | 4122.0549 | 1.0128 | <a href="#">CILEFDPLHTKEKSQAQLQLTLLDESSPMLLCGK</a>    |                                 |
| 10.6  | 4122.0516 | 1.0162 | <a href="#">VMLENFRNLVFLGIDVSKPDLITCLEQGKDPWNMK</a>   |                                 |
| 10.5  | 4122.0549 | 1.0128 | <a href="#">CILEFDPLHTKEKSQAQLQLTLLDESSPMLLCGK</a>    |                                 |

Mascot: <http://www.matrixscience.com/>

# MASCOT SCIENCE Mascot Search Results

## Peptide View

MS/MS Fragmentation of **RNHSCPCQTLAVR**

Found in **P00748** in **con\_Xuniprot\_HUMAN3**, FA12\_HUMAN Coagulation factor XII OS=Homo sapiens GN=F12 PE=1 SV=3

Match to Query 8782: 1727.787552 from(576.936460,3+) intensity(12174.5117) rtinseconds(314) scans(573) index(22458)

Title: 111019\_Est\_MI\_YS\_G\_03Spectrum459\_scans\_\_573

Data file C:\\mascot\\20140703\_Tmgf\_1D\\CSV\_UseAnalysis\\MasterCSV\\All\_Glyco\\mgf\\ptm\\UC18ERLIC\_PTM\_35D.mgf

Click mouse within plot area to zoom in by factor of two about that point

Or, to Da

Label all possible matches Label matches used for scoring

Show Y-axis

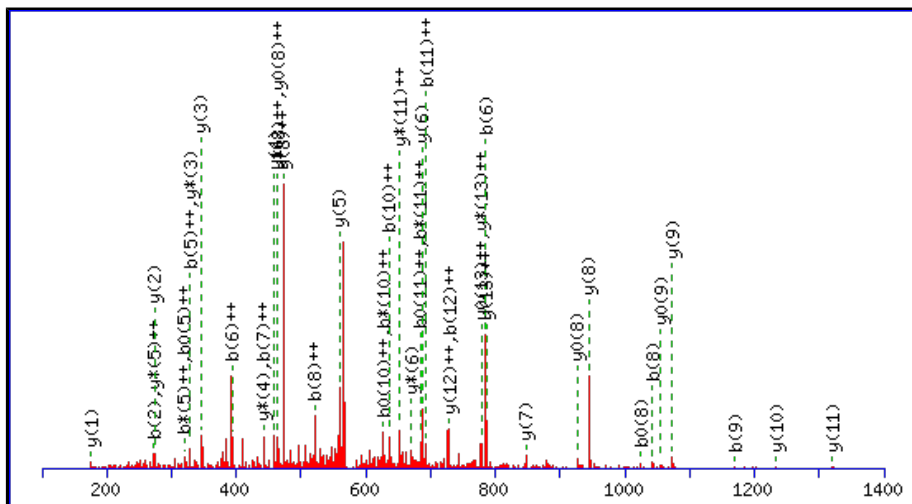

Monoisotopic mass of neutral peptide Mr(calc): 1727.7832

Fixed modifications: Carbamidomethyl (C) (apply to specified residues or termini only)

Variable modifications:

N2 : Deamidated (NQ)

Ions Score: 75 Expect: 5e-006

Matches : 44/142 fragment ions using 54 most intense peaks ([help](#))

| #  | b                | b <sup>++</sup> | b <sup>*</sup> | b <sup>*++</sup> | b <sup>0</sup>   | b <sup>0++</sup> | Seq. | y                | y <sup>++</sup> | y <sup>*</sup>  | y <sup>*++</sup> | y <sup>0</sup>   | y <sup>0++</sup> | #  |
|----|------------------|-----------------|----------------|------------------|------------------|------------------|------|------------------|-----------------|-----------------|------------------|------------------|------------------|----|
| 1  | 157.1084         | 79.0578         | 140.0818       | 70.5446          |                  |                  | R    |                  |                 |                 |                  |                  |                  | 14 |
| 2  | <b>272.1353</b>  | 136.5713        | 255.1088       | 128.0580         |                  |                  | N    | 1572.6893        | <b>786.8483</b> | 1555.6628       | <b>778.3350</b>  | 1554.6788        | <b>777.8430</b>  | 13 |
| 3  | 409.1942         | 205.1008        | 392.1677       | 196.5875         |                  |                  | H    | 1457.6624        | <b>729.3348</b> | 1440.6358       | 720.8216         | 1439.6518        | 720.3296         | 12 |
| 4  | 496.2263         | 248.6168        | 479.1997       | 240.1035         | 478.2157         | 239.6115         | S    | <b>1320.6035</b> | 660.8054        | 1303.5769       | <b>652.2921</b>  | 1302.5929        | 651.8001         | 11 |
| 5  | 656.2569         | <b>328.6321</b> | 639.2304       | <b>320.1188</b>  | 638.2464         | <b>319.6268</b>  | C    | <b>1233.5715</b> | 617.2894        | 1216.5449       | 608.7761         | 1215.5609        | 608.2841         | 10 |
| 6  | <b>785.2995</b>  | <b>393.1534</b> | 768.2730       | 384.6401         | 767.2889         | 384.1481         | E    | <b>1073.5408</b> | 537.2740        | 1056.5143       | 528.7608         | <b>1055.5302</b> | 528.2688         | 9  |
| 7  | 882.3523         | <b>441.6798</b> | 865.3257       | 433.1665         | 864.3417         | 432.6745         | P    | <b>944.4982</b>  | <b>472.7527</b> | 927.4717        | <b>464.2395</b>  | <b>926.4876</b>  | <b>463.7475</b>  | 8  |
| 8  | <b>1042.3829</b> | <b>521.6951</b> | 1025.3564      | 513.1818         | <b>1024.3724</b> | 512.6898         | C    | <b>847.4455</b>  | 424.2264        | 830.4189        | 415.7131         | 829.4349         | 415.2211         | 7  |
| 9  | <b>1170.4415</b> | 585.7244        | 1153.4150      | 577.2111         | 1152.4309        | 576.7191         | Q    | <b>687.4148</b>  | 344.2110        | <b>670.3883</b> | 335.6978         | 669.4042         | 335.2058         | 6  |
| 10 | 1271.4892        | <b>636.2482</b> | 1254.4626      | <b>627.7350</b>  | 1253.4786        | <b>627.2429</b>  | T    | <b>559.3562</b>  | 280.1817        | 542.3297        | <b>271.6685</b>  | 541.3457         | 271.1765         | 5  |
| 11 | 1384.5732        | <b>692.7903</b> | 1367.5467      | <b>684.2770</b>  | 1366.5627        | <b>683.7850</b>  | L    | <b>458.3085</b>  | 229.6579        | <b>441.2820</b> | 221.1446         |                  |                  | 4  |
| 12 | 1455.6104        | <b>728.3088</b> | 1438.5838      | 719.7955         | 1437.5998        | 719.3035         | A    | <b>345.2245</b>  | 173.1159        | <b>328.1979</b> | 164.6026         |                  |                  | 3  |
| 13 | 1554.6788        | <b>777.8430</b> | 1537.6522      | 769.3298         | 1536.6682        | 768.8377         | V    | <b>274.1874</b>  | 137.5973        | 257.1608        | 129.0840         |                  |                  | 2  |
| 14 |                  |                 |                |                  |                  |                  | R    | <b>175.1190</b>  | 88.0631         | 158.0924        | 79.5498          |                  |                  | 1  |

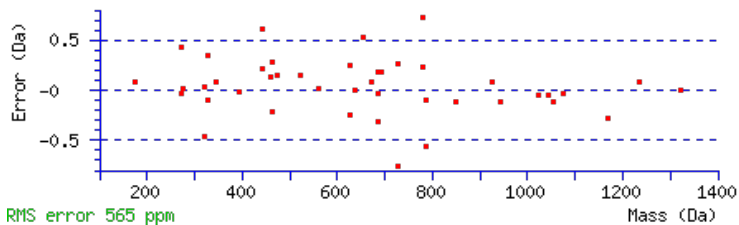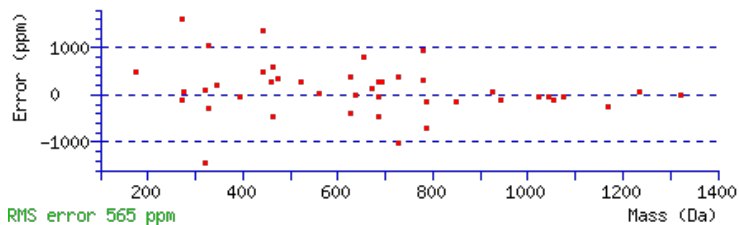

NCBI BLAST search of [RNHSCEPCQTLAVR](#)

(Parameters: blastp, nr protein database, expect=20000, no filter, PAM30)

Other BLAST [web gateways](#)

All matches to this query

| Score | Mr(calc)  | Delta   | Sequence                         | Site Analysis         |
|-------|-----------|---------|----------------------------------|-----------------------|
| 74.6  | 1727.7832 | 0.0044  | <a href="#">RNHSCEPCQTLAVR</a>   | Deamidated N2 100.00% |
| 29.9  | 1727.7832 | 0.0044  | <a href="#">RNHSCEPCQTLAVR</a>   | Deamidated Q9 0.00%   |
| 11.3  | 1726.7924 | 0.9951  | <a href="#">GSRGSGWSPFGHQGPR</a> |                       |
| 10.8  | 1727.7896 | -0.0021 | <a href="#">ELNSANRTYDRNMK</a>   |                       |
| 7.5   | 1727.7897 | -0.0021 | <a href="#">GKNETNHVNEKMGPR</a>  |                       |
| 6.3   | 1726.7832 | 1.0044  | <a href="#">REEELQYTLEDMR</a>    |                       |
| 5.2   | 1725.7747 | 2.0128  | <a href="#">EPWSGPEWVGESGPR</a>  |                       |
| 5.0   | 1726.7832 | 1.0043  | <a href="#">CIAQAQEQDSTSVK</a>   |                       |
| 4.7   | 1727.7897 | -0.0021 | <a href="#">GKNETNHVNEKMGPR</a>  |                       |
| 4.6   | 1726.7832 | 1.0044  | <a href="#">MQEHQQVQLQAVR</a>    |                       |

Mascot: <http://www.matrixscience.com/>

# MASCOT SCIENCE Mascot Search Results

## Peptide View

MS/MS Fragmentation of **TTLGAPCQPWASEATYRNVTAEQAR**

Found in **P00748** in **con\_Xuniprot\_HUMAN3**, FA12\_HUMAN Coagulation factor XII OS=Homo sapiens GN=F12 PE=1 SV=3

Match to Query 26008: 2865.349032 from(956.123620,3+) intensity(15894.9053) rtinseconds(1367) scans(3265) index(23181)

Title: 111019\_Est\_MI\_YS\_G\_04Spectrum2783\_scans\_\_3265

Data file C:\mascot\20140703\_Tmgf\_1D\CSV\_UseAnalysis\MasterCSV\All\_Glyco\mgf\ptm\UC18ERLIC\_PTM\_35D.mgf

Click mouse within plot area to zoom in by factor of two about that point

Or,  to  Da

Label all possible matches  Label matches used for scoring

Show Y-axis

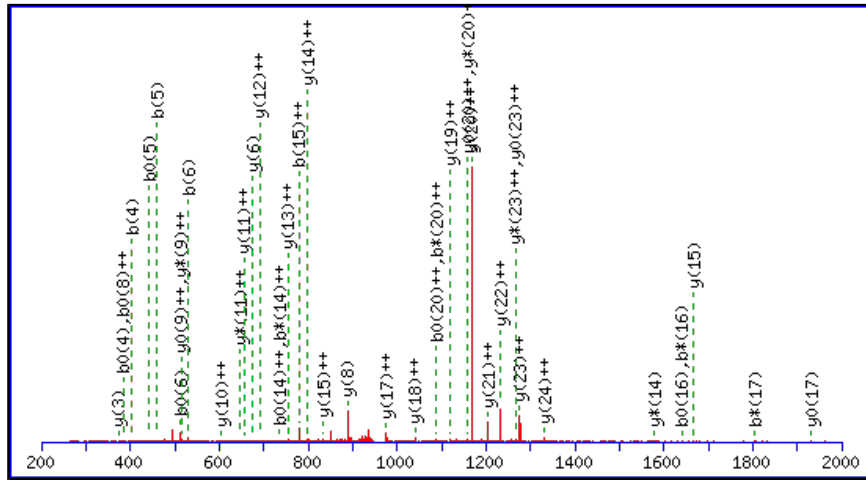

Monoisotopic mass of neutral peptide Mr(calc): 2865.3351

Fixed modifications: Carbamidomethyl (C) (apply to specified residues or termini only)

Variable modifications:

N19 : Deamidated (NQ)

Ions Score: 48 Expect: 0.0042

Matches : 42/278 fragment ions using 84 most intense peaks ([help](#))

| #  | b         | b <sup>++</sup> | b <sup>*</sup> | b <sup>*++</sup> | b <sup>0</sup> | b <sup>0++</sup> | Seq. | y         | y <sup>++</sup> | y <sup>*</sup> | y <sup>*++</sup> | y <sup>0</sup> | y <sup>0++</sup> | #  |
|----|-----------|-----------------|----------------|------------------|----------------|------------------|------|-----------|-----------------|----------------|------------------|----------------|------------------|----|
| 1  | 102.0550  | 51.5311         |                |                  | 84.0444        | 42.5258          | T    |           |                 |                |                  |                |                  | 26 |
| 2  | 203.1026  | 102.0550        |                |                  | 185.0921       | 93.0497          | T    | 2765.2948 | 1383.1510       | 2748.2682      | 1374.6377        | 2747.2842      | 1374.1457        | 25 |
| 3  | 316.1867  | 158.5970        |                |                  | 298.1761       | 149.5917         | L    | 2664.2471 | 1332.6272       | 2647.2205      | 1324.1139        | 2646.2365      | 1323.6219        | 24 |
| 4  | 403.2187  | 202.1130        |                |                  | 385.2082       | 193.1077         | S    | 2551.1630 | 1276.0852       | 2534.1365      | 1267.5719        | 2533.1525      | 1267.0799        | 23 |
| 5  | 460.2402  | 230.6237        |                |                  | 442.2296       | 221.6185         | G    | 2464.1310 | 1232.5691       | 2447.1045      | 1224.0559        | 2446.1204      | 1223.5639        | 22 |
| 6  | 531.2773  | 266.1423        |                |                  | 513.2667       | 257.1370         | A    | 2407.1095 | 1204.0584       | 2390.0830      | 1195.5451        | 2389.0990      | 1195.0531        | 21 |
| 7  | 628.3301  | 314.6687        |                |                  | 610.3195       | 305.6634         | P    | 2336.0724 | 1168.5398       | 2319.0459      | 1160.0266        | 2318.0619      | 1159.5346        | 20 |
| 8  | 788.3607  | 394.6840        |                |                  | 770.3502       | 385.6787         | C    | 2239.0197 | 1120.0135       | 2221.9931      | 1111.5002        | 2221.0091      | 1111.0082        | 19 |
| 9  | 916.4193  | 458.7133        | 899.3927       | 450.2000         | 898.4087       | 449.7080         | Q    | 2078.9890 | 1039.9981       | 2061.9625      | 1031.4849        | 2060.9784      | 1030.9929        | 18 |
| 10 | 1013.4721 | 507.2397        | 996.4455       | 498.7264         | 995.4615       | 498.2344         | P    | 1950.9304 | 975.9689        | 1933.9039      | 967.4556         | 1932.9199      | 966.9636         | 17 |
| 11 | 1199.5514 | 600.2793        | 1182.5248      | 591.7660         | 1181.5408      | 591.2740         | W    | 1853.8777 | 927.4425        | 1836.8511      | 918.9292         | 1835.8671      | 918.4372         | 16 |
| 12 | 1270.5885 | 635.7979        | 1253.5619      | 627.2846         | 1252.5779      | 626.7926         | A    | 1667.7984 | 834.4028        | 1650.7718      | 825.8895         | 1649.7878      | 825.3975         | 15 |
| 13 | 1357.6205 | 679.3139        | 1340.5940      | 670.8006         | 1339.6099      | 670.3086         | S    | 1596.7612 | 798.8843        | 1579.7347      | 790.3710         | 1578.7507      | 789.8790         | 14 |
| 14 | 1486.6631 | 743.8352        | 1469.6366      | 735.3219         | 1468.6525      | 734.8299         | E    | 1509.7292 | 755.3682        | 1492.7027      | 746.8550         | 1491.7186      | 746.3630         | 13 |
| 15 | 1557.7002 | 779.3537        | 1540.6737      | 770.8405         | 1539.6897      | 770.3485         | A    | 1380.6866 | 690.8469        | 1363.6601      | 682.3337         | 1362.6761      | 681.8417         | 12 |
| 16 | 1658.7479 | 829.8776        | 1641.7214      | 821.3643         | 1640.7373      | 820.8723         | T    | 1309.6495 | 655.3284        | 1292.6230      | 646.8151         | 1291.6389      | 646.3231         | 11 |
| 17 | 1821.8112 | 911.4093        | 1804.7847      | 902.8960         | 1803.8007      | 902.4040         | Y    | 1208.6018 | 604.8046        | 1191.5753      | 596.2913         | 1190.5913      | 595.7993         | 10 |
| 18 | 1977.9123 | 989.4598        | 1960.8858      | 980.9465         | 1959.9018      | 980.4545         | R    | 1045.5385 | 523.2729        | 1028.5119      | 514.7596         | 1027.5279      | 514.2676         | 9  |
| 19 | 2092.9393 | 1046.9733       | 2075.9127      | 1038.4600        | 2074.9287      | 1037.9680        | N    | 889.4374  | 445.2223        | 872.4108       | 436.7091         | 871.4268       | 436.2170         | 8  |
| 20 | 2192.0077 | 1096.5075       | 2174.9811      | 1087.9942        | 2173.9971      | 1087.5022        | V    | 774.4104  | 387.7089        | 757.3839       | 379.1956         | 756.3999       | 378.7036         | 7  |
| 21 | 2293.0554 | 1147.0313       | 2276.0288      | 1138.5181        | 2275.0448      | 1138.0260        | T    | 675.3420  | 338.1747        | 658.3155       | 329.6614         | 657.3315       | 329.1694         | 6  |
| 22 | 2364.0925 | 1182.5499       | 2347.0659      | 1174.0366        | 2346.0819      | 1173.5446        | A    | 574.2944  | 287.6508        | 557.2678       | 279.1375         | 556.2838       | 278.6455         | 5  |
| 23 | 2493.1351 | 1247.0712       | 2476.1085      | 1238.5579        | 2475.1245      | 1238.0659        | E    | 503.2572  | 252.1323        | 486.2307       | 243.6190         | 485.2467       | 243.1270         | 4  |

|    |           |           |           |           |           |           |   |          |          |          |          |  |  |   |
|----|-----------|-----------|-----------|-----------|-----------|-----------|---|----------|----------|----------|----------|--|--|---|
| 24 | 2621.1937 | 1311.1005 | 2604.1671 | 1302.5872 | 2603.1831 | 1302.0952 | Q | 374.2146 | 187.6110 | 357.1881 | 179.0977 |  |  | 3 |
| 25 | 2692.2308 | 1346.6190 | 2675.2042 | 1338.1058 | 2674.2202 | 1337.6137 | A | 246.1561 | 123.5817 | 229.1295 | 115.0684 |  |  | 2 |
| 26 |           |           |           |           |           |           | R | 175.1190 | 88.0631  | 158.0924 | 79.5498  |  |  | 1 |

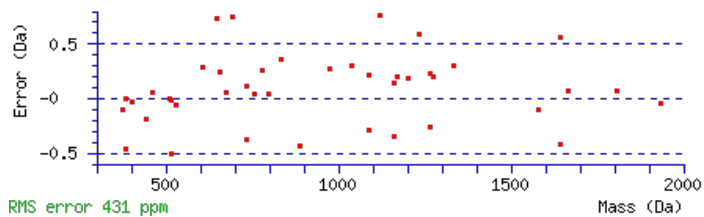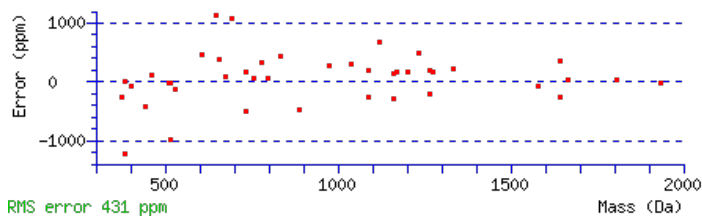

NCBI BLAST search of [TTLSGAPCQPWASEATYRNVTAEQAR](#)  
 (Parameters: blastp, nr protein database, expect=20000, no filter, PAM30)  
 Other BLAST [web gateways](#)

All matches to this query

| Score | Mr(calc)  | Delta   | Sequence                                      | Site Analysis         |
|-------|-----------|---------|-----------------------------------------------|-----------------------|
| 47.5  | 2865.3351 | 0.0139  | <a href="#">TTLSGAPCQPWASEATYRNVTAEQAR</a>    | Deamidated N19 78.86% |
| 40.4  | 2865.3351 | 0.0139  | <a href="#">TTLSGAPCQPWASEATYRNVTAEQAR</a>    | Deamidated Q24 15.17% |
| 36.3  | 2865.3351 | 0.0139  | <a href="#">TTLSGAPCQPWASEATYRNVTAEQAR</a>    | Deamidated Q9 5.97%   |
| 23.8  | 2864.3511 | 0.9979  | <a href="#">TTLSGAPCQPWASEATYRNVTAEQAR</a>    |                       |
| 16.6  | 2863.3521 | 1.9970  | <a href="#">LTSVRFMGDMVSEEDRINATVWK</a>       |                       |
| 7.9   | 2863.3521 | 1.9970  | <a href="#">HYNLQVFAPPNMDNSMGTEEITVLK</a>     |                       |
| 7.6   | 2865.3558 | -0.0068 | <a href="#">VSSNETEIMKEIMQNGPQAIMQVR</a>      |                       |
| 6.6   | 2864.3361 | 1.0130  | <a href="#">HYNLQVFAPPNMDNSMGTEEITVLK</a>     |                       |
| 6.3   | 2863.3467 | 2.0024  | <a href="#">SOVTL DVEKLC DLEIMP SSEAADGEK</a> |                       |
| 6.1   | 2864.3498 | 0.9993  | <a href="#">ASEDKMEIQDQSVDQTGWLRQLIR</a>      |                       |

Mascot: <http://www.matrixscience.com/>

# MASCOT SCIENCE Mascot Search Results

## Peptide View

MS/MS Fragmentation of **LGACNDTLQQLMEVFK**

Found in **P01008** in **con\_Xuniprot\_HUMAN3**, ANT3\_HUMAN Antithrombin-III OS=Homo sapiens GN=SERPINC1 PE=1 SV=1

Match to Query 11062: 1882.884128 from(942.449340,2+) intensity(1279338.5000) rtinseconds(2214) scans(5863) index(4587)

Title: 111019\_Est\_ISCardio\_NMI\_YP\_G\_7Spectrum4985\_scans\_\_5863

Data file C:\\mascot\\20140703\_Tmgf\_1D\\CSV\_UseAnalysis\\MasterCSV\\All\_Glyco\\mgf\\ptm\\UC18ERLIC\_PTM\_35D.mgf

Click mouse within plot area to zoom in by factor of two about that point

Or, to Da

Label all possible matches Label matches used for scoring

Show Y-axis

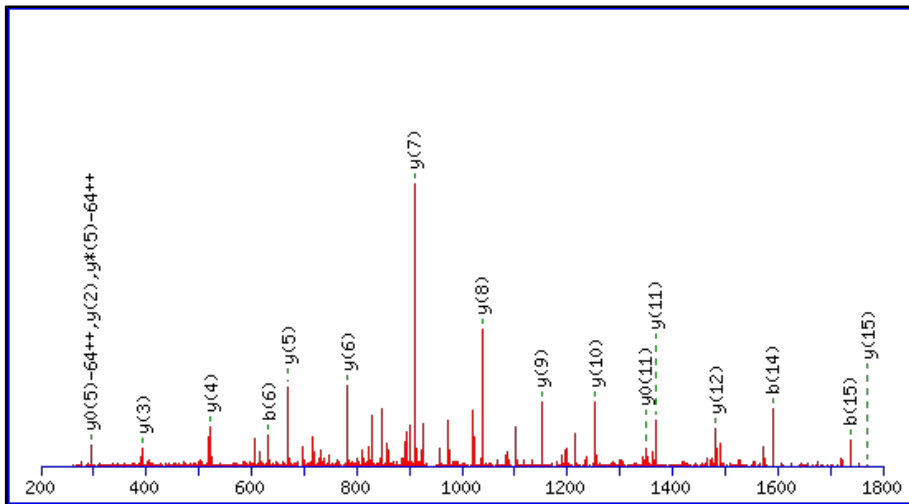

Monoisotopic mass of neutral peptide Mr(calc): 1882.8805

Fixed modifications: Carbamidomethyl (C) (apply to specified residues or termini only)

Variable modifications:

N5 : Deamidated (NQ)

M12 : Oxidation (M), with neutral losses 0.0000(shown in table), 63.9983

Ions Score: 131 Expect: 1.7e-011

Matches : 18/246 fragment ions using 16 most intense peaks ([help](#))

| #  | b         | b <sup>++</sup> | b <sup>*</sup> | b <sup>*++</sup> | b <sup>0</sup> | b <sup>0++</sup> | Seq. | y         | y <sup>++</sup> | y <sup>*</sup> | y <sup>*++</sup> | y <sup>0</sup> | y <sup>0++</sup> | #  |
|----|-----------|-----------------|----------------|------------------|----------------|------------------|------|-----------|-----------------|----------------|------------------|----------------|------------------|----|
| 1  | 114.0913  | 57.5493         |                |                  |                |                  | L    |           |                 |                |                  |                |                  | 16 |
| 2  | 171.1128  | 86.0600         |                |                  |                |                  | G    | 1770.8037 | 885.9055        | 1753.7772      | 877.3922         | 1752.7931      | 876.9002         | 15 |
| 3  | 242.1499  | 121.5786        |                |                  |                |                  | A    | 1713.7822 | 857.3948        | 1696.7557      | 848.8815         | 1695.7717      | 848.3895         | 14 |
| 4  | 402.1806  | 201.5939        |                |                  |                |                  | C    | 1642.7451 | 821.8762        | 1625.7186      | 813.3629         | 1624.7346      | 812.8709         | 13 |
| 5  | 517.2075  | 259.1074        | 500.1810       | 250.5941         |                |                  | N    | 1482.7145 | 741.8609        | 1465.6879      | 733.3476         | 1464.7039      | 732.8556         | 12 |
| 6  | 632.2345  | 316.6209        | 615.2079       | 308.1076         | 614.2239       | 307.6156         | D    | 1367.6875 | 684.3474        | 1350.6610      | 675.8341         | 1349.6770      | 675.3421         | 11 |
| 7  | 733.2821  | 367.1447        | 716.2556       | 358.6314         | 715.2716       | 358.1394         | T    | 1252.6606 | 626.8339        | 1235.6340      | 618.3207         | 1234.6500      | 617.8286         | 10 |
| 8  | 846.3662  | 423.6867        | 829.3396       | 415.1735         | 828.3556       | 414.6815         | L    | 1151.6129 | 576.3101        | 1134.5864      | 567.7968         | 1133.6023      | 567.3048         | 9  |
| 9  | 974.4248  | 487.7160        | 957.3982       | 479.2028         | 956.4142       | 478.7107         | Q    | 1038.5288 | 519.7681        | 1021.5023      | 511.2548         | 1020.5183      | 510.7628         | 8  |
| 10 | 1102.4834 | 551.7453        | 1085.4568      | 543.2320         | 1084.4728      | 542.7400         | Q    | 910.4703  | 455.7388        | 893.4437       | 447.2255         | 892.4597       | 446.7335         | 7  |
| 11 | 1215.5674 | 608.2873        | 1198.5409      | 599.7741         | 1197.5569      | 599.2821         | L    | 782.4117  | 391.7095        | 765.3851       | 383.1962         | 764.4011       | 382.7042         | 6  |
| 12 | 1362.6028 | 681.8050        | 1345.5763      | 673.2918         | 1344.5923      | 672.7998         | M    | 669.3276  | 335.1675        | 652.3011       | 326.6542         | 651.3171       | 326.1622         | 5  |
| 13 | 1491.6454 | 746.3263        | 1474.6189      | 737.8131         | 1473.6348      | 737.3211         | E    | 522.2922  | 261.6498        | 505.2657       | 253.1365         | 504.2817       | 252.6445         | 4  |
| 14 | 1590.7138 | 795.8605        | 1573.6873      | 787.3473         | 1572.7033      | 786.8553         | V    | 393.2496  | 197.1285        | 376.2231       | 188.6152         |                |                  | 3  |
| 15 | 1737.7822 | 869.3948        | 1720.7557      | 860.8815         | 1719.7717      | 860.3895         | F    | 294.1812  | 147.5942        | 277.1547       | 139.0810         |                |                  | 2  |
| 16 |           |                 |                |                  |                |                  | K    | 147.1128  | 74.0600         | 130.0863       | 65.5468          |                |                  | 1  |

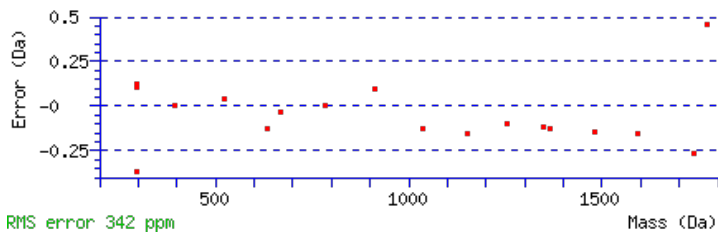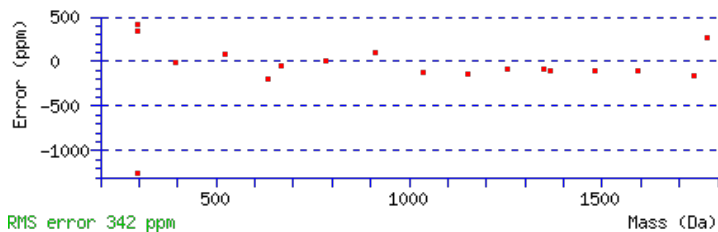

NCBI BLAST search of [LGACNDTLQQLMEVFK](#)

(Parameters: blastp, nr protein database, expect=20000, no filter, PAM30)

Other BLAST [web gateways](#)

All matches to this query

| Score | Mr(calc)  | Delta   | Sequence                         | Site Analysis        |
|-------|-----------|---------|----------------------------------|----------------------|
| 131.1 | 1882.8805 | 0.0037  | <a href="#">LGACNDTLQQLMEVFK</a> | Deamidated N5 99.99% |
| 87.9  | 1882.8805 | 0.0037  | <a href="#">LGACNDTLQQLMEVFK</a> | Deamidated Q10 0.00% |
| 87.8  | 1882.8805 | 0.0037  | <a href="#">LGACNDTLQQLMEVFK</a> | Deamidated Q9 0.00%  |
| 21.1  | 1880.8859 | 1.9982  | <a href="#">DQNDQKLEKLMVQMK</a>  |                      |
| 21.1  | 1880.8859 | 1.9982  | <a href="#">DQNDQKLEKLMVQMK</a>  |                      |
| 21.1  | 1880.8859 | 1.9982  | <a href="#">DQNDQKLEKLMVQMK</a>  |                      |
| 12.2  | 1881.8744 | 1.0097  | <a href="#">KFDEFQKDLNTNEPR</a>  |                      |
| 12.1  | 1882.8804 | 0.0037  | <a href="#">INQENLMASEMIALNR</a> |                      |
| 10.9  | 1881.8744 | 1.0097  | <a href="#">KFDEFQKDLNTNEPR</a>  |                      |
| 10.9  | 1882.8917 | -0.0075 | <a href="#">NILPKQSCYMEAREK</a>  |                      |

Mascot: <http://www.matrixscience.com/>



# MASCOT SCIENCE Mascot Search Results

## Peptide View

MS/MS Fragmentation of **LGACNDTLQQLMEVFK**

Found in **P01008** in **con\_Xuniprot\_HUMAN3**, ANT3\_HUMAN Antithrombin-III OS=Homo sapiens GN=SERPINC1 PE=1 SV=1

Match to Query 10994: 1866.891948 from(934.453250,2+) intensity(219335.4844) rtinseconds(2601) scans(6813) index(11294)

Title: 111019\_Est\_ISCardio\_NMI\_YS\_G\_7Spectrum5862\_scans\_\_6813

Data file C:\\mascot\\20140703\_Tmgf\_1D\\CSV\_UseAnalysis\\MasterCSV\\All\_Glyco\\mgf\\ptm\\UC18ERLIC\_PTM\_35D.mgf

Click mouse within plot area to zoom in by factor of two about that point

Or, to Da

Label all possible matches Label matches used for scoring

Show Y-axis

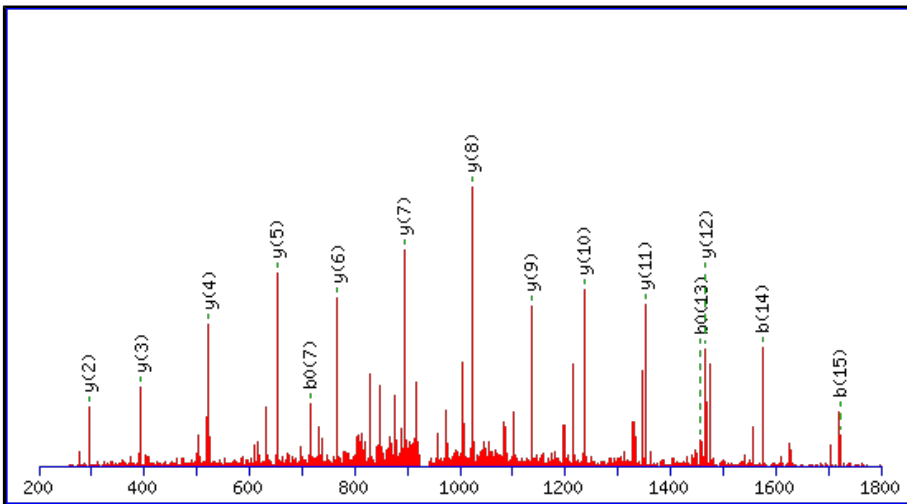

Monoisotopic mass of neutral peptide Mr(calc): 1866.8856

Fixed modifications: Carbamidomethyl (C) (apply to specified residues or termini only)

Variable modifications:

N5 : Deamidated (NQ)

Ions Score: 110 Expect: 2.2e-009

Matches : 15/156 fragment ions using 16 most intense peaks ([help](#))

| #  | b                | b <sup>++</sup> | b <sup>*</sup> | b <sup>*++</sup> | b <sup>0</sup>   | b <sup>0++</sup> | Seq. | y                | y <sup>++</sup> | y <sup>*</sup> | y <sup>*++</sup> | y <sup>0</sup> | y <sup>0++</sup> | #  |
|----|------------------|-----------------|----------------|------------------|------------------|------------------|------|------------------|-----------------|----------------|------------------|----------------|------------------|----|
| 1  | 114.0913         | 57.5493         |                |                  |                  |                  | L    |                  |                 |                |                  |                |                  | 16 |
| 2  | 171.1128         | 86.0600         |                |                  |                  |                  | G    | 1754.8088        | 877.9080        | 1737.7822      | 869.3948         | 1736.7982      | 868.9027         | 15 |
| 3  | 242.1499         | 121.5786        |                |                  |                  |                  | A    | 1697.7873        | 849.3973        | 1680.7608      | 840.8840         | 1679.7768      | 840.3920         | 14 |
| 4  | 402.1806         | 201.5939        |                |                  |                  |                  | C    | 1626.7502        | 813.8787        | 1609.7237      | 805.3655         | 1608.7396      | 804.8735         | 13 |
| 5  | 517.2075         | 259.1074        | 500.1810       | 250.5941         |                  |                  | N    | <b>1466.7196</b> | 733.8634        | 1449.6930      | 725.3501         | 1448.7090      | 724.8581         | 12 |
| 6  | 632.2345         | 316.6209        | 615.2079       | 308.1076         | 614.2239         | 307.6156         | D    | <b>1351.6926</b> | 676.3499        | 1334.6661      | 667.8367         | 1333.6821      | 667.3447         | 11 |
| 7  | 733.2821         | 367.1447        | 716.2556       | 358.6314         | <b>715.2716</b>  | 358.1394         | T    | <b>1236.6657</b> | 618.8365        | 1219.6391      | 610.3232         | 1218.6551      | 609.8312         | 10 |
| 8  | 846.3662         | 423.6867        | 829.3396       | 415.1735         | 828.3556         | 414.6815         | L    | <b>1135.6180</b> | 568.3126        | 1118.5914      | 559.7994         | 1117.6074      | 559.3074         | 9  |
| 9  | 974.4248         | 487.7160        | 957.3982       | 479.2028         | 956.4142         | 478.7107         | Q    | <b>1022.5339</b> | 511.7706        | 1005.5074      | 503.2573         | 1004.5234      | 502.7653         | 8  |
| 10 | 1102.4834        | 551.7453        | 1085.4568      | 543.2320         | 1084.4728        | 542.7400         | Q    | <b>894.4754</b>  | 447.7413        | 877.4488       | 439.2280         | 876.4648       | 438.7360         | 7  |
| 11 | 1215.5674        | 608.2873        | 1198.5409      | 599.7741         | 1197.5569        | 599.2821         | L    | <b>766.4168</b>  | 383.7120        | 749.3902       | 375.1988         | 748.4062       | 374.7067         | 6  |
| 12 | 1346.6079        | 673.8076        | 1329.5814      | 665.2943         | 1328.5973        | 664.8023         | M    | <b>653.3327</b>  | 327.1700        | 636.3062       | 318.6567         | 635.3221       | 318.1647         | 5  |
| 13 | 1475.6505        | 738.3289        | 1458.6239      | 729.8156         | <b>1457.6399</b> | 729.3236         | E    | <b>522.2922</b>  | 261.6498        | 505.2657       | 253.1365         | 504.2817       | 252.6445         | 4  |
| 14 | <b>1574.7189</b> | 787.8631        | 1557.6924      | 779.3498         | 1556.7083        | 778.8578         | V    | <b>393.2496</b>  | 197.1285        | 376.2231       | 188.6152         |                |                  | 3  |
| 15 | <b>1721.7873</b> | 861.3973        | 1704.7608      | 852.8840         | 1703.7768        | 852.3920         | F    | <b>294.1812</b>  | 147.5942        | 277.1547       | 139.0810         |                |                  | 2  |
| 16 |                  |                 |                |                  |                  |                  | K    | 147.1128         | 74.0600         | 130.0863       | 65.5468          |                |                  | 1  |

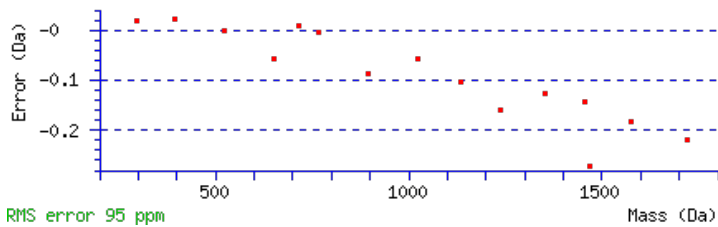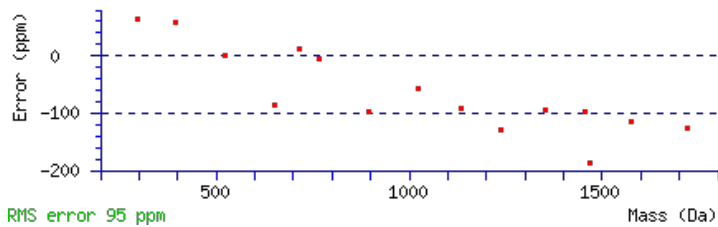

NCBI BLAST search of [LGACNDTLQQLMEVFK](#)

(Parameters: blastp, nr protein database, expect=20000, no filter, PAM30)

Other BLAST [web gateways](#)

**All matches to this query**

| Score | Mr(calc)  | Delta   | Sequence                         | Site Analysis        |
|-------|-----------|---------|----------------------------------|----------------------|
| 110.1 | 1866.8856 | 0.0064  | <a href="#">LGACNDTLQQLMEVFK</a> | Deamidated N5 99.90% |
| 77.1  | 1866.8856 | 0.0064  | <a href="#">LGACNDTLQQLMEVFK</a> | Deamidated Q9 0.05%  |
| 76.9  | 1866.8856 | 0.0064  | <a href="#">LGACNDTLQQLMEVFK</a> | Deamidated Q10 0.05% |
| 11.8  | 1864.8910 | 2.0009  | <a href="#">DQNDQKLEKLMVQMK</a>  |                      |
| 11.8  | 1864.8910 | 2.0009  | <a href="#">DQNDQKLEKLMVQMK</a>  |                      |
| 11.8  | 1864.8910 | 2.0009  | <a href="#">DQNDQKLEKLMVQMK</a>  |                      |
| 9.8   | 1866.8894 | 0.0025  | <a href="#">LDCRSTISRPSGFDEK</a> |                      |
| 8.3   | 1866.8934 | -0.0015 | <a href="#">IGNTMQSLQWYLQER</a>  |                      |
| 5.9   | 1866.8941 | -0.0021 | <a href="#">QSWNPFDFTPQKFK</a>   |                      |
| 5.7   | 1866.8889 | 0.0030  | <a href="#">TIRPMDMETIEASVMK</a> |                      |

Mascot: <http://www.matrixscience.com/>

# MASCOT SCIENCE Mascot Search Results

## Peptide View

MS/MS Fragmentation of **LGACNDTLQQLMEVFK**

Found in **P01008** in **con\_Xuniprot\_HUMAN3**, ANT3\_HUMAN Antithrombin-III OS=Homo sapiens GN=SERPINC1 PE=1 SV=1

Match to Query 11099: 1883.869588 from(942.942070,2+) intensity(29041.4238) rtinseconds(2311) scans(6132) index(4611)

Title: 111019\_Est\_ISCardio\_NMI\_YP\_G\_7Spectrum5220\_scans\_\_6132

Data file C:\\mascot\\20140703\_Tmgf\_1D\\CSV\_UseAnalysis\\MasterCSV\\All\_Glyco\\mgf\\ptm\\UC18ERLIC\_PTM\_35D.mgf

Click mouse within plot area to zoom in by factor of two about that point

Or, to Da

Label all possible matches Label matches used for scoring

Show Y-axis

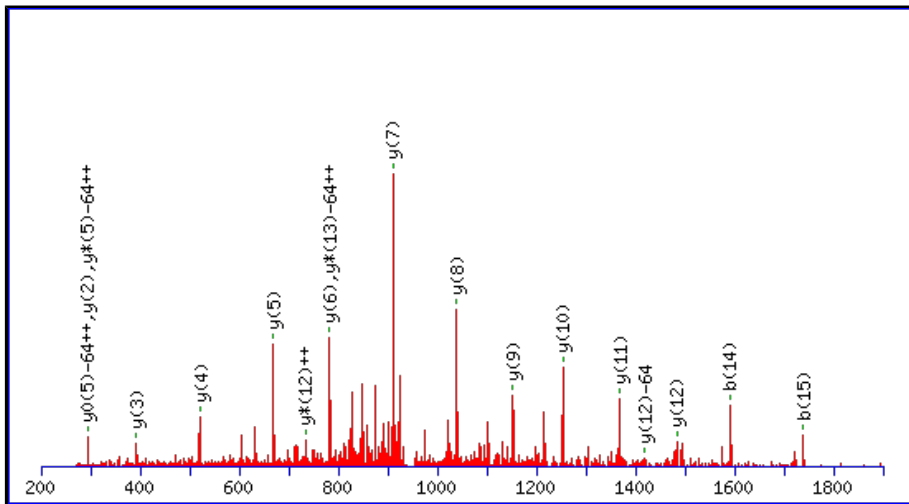

**Monoisotopic mass of neutral peptide Mr(calc):** 1883.8645

**Fixed modifications:** Carbamidomethyl (C) (apply to specified residues or termini only)

**Variable modifications:**

N5 : Deamidated (NQ)

Q10 : Deamidated (NQ)

M12 : Oxidation (M), with neutral losses 0.0000(shown in table), 63.9983

**Ions Score:** 109 **Expect:** 2.2e-009

**Matches:** 18/246 fragment ions using 16 most intense peaks ([help](#))

| #  | b                | b <sup>++</sup> | b <sup>*</sup> | b <sup>*++</sup> | b <sup>0</sup> | b <sup>0++</sup> | Seq. | y                | y <sup>++</sup> | y <sup>*</sup> | y <sup>*++</sup> | y <sup>0</sup> | y <sup>0++</sup> | #  |
|----|------------------|-----------------|----------------|------------------|----------------|------------------|------|------------------|-----------------|----------------|------------------|----------------|------------------|----|
| 1  | 114.0913         | 57.5493         |                |                  |                |                  | L    |                  |                 |                |                  |                |                  | 16 |
| 2  | 171.1128         | 86.0600         |                |                  |                |                  | G    | 1771.7877        | 886.3975        | 1754.7612      | 877.8842         | 1753.7772      | 877.3922         | 15 |
| 3  | 242.1499         | 121.5786        |                |                  |                |                  | A    | 1714.7663        | 857.8868        | 1697.7397      | 849.3735         | 1696.7557      | 848.8815         | 14 |
| 4  | 402.1806         | 201.5939        |                |                  |                |                  | C    | 1643.7291        | 822.3682        | 1626.7026      | 813.8549         | 1625.7186      | 813.3629         | 13 |
| 5  | 517.2075         | 259.1074        | 500.1810       | 250.5941         |                |                  | N    | <b>1483.6985</b> | 742.3529        | 1466.6719      | <b>733.8396</b>  | 1465.6879      | 733.3476         | 12 |
| 6  | 632.2345         | 316.6209        | 615.2079       | 308.1076         | 614.2239       | 307.6156         | D    | <b>1368.6715</b> | 684.8394        | 1351.6450      | 676.3261         | 1350.6610      | 675.8341         | 11 |
| 7  | 733.2821         | 367.1447        | 716.2556       | 358.6314         | 715.2716       | 358.1394         | T    | <b>1253.6446</b> | 627.3259        | 1236.6181      | 618.8127         | 1235.6340      | 618.3207         | 10 |
| 8  | 846.3662         | 423.6867        | 829.3396       | 415.1735         | 828.3556       | 414.6815         | L    | <b>1152.5969</b> | 576.8021        | 1135.5704      | 568.2888         | 1134.5864      | 567.7968         | 9  |
| 9  | 974.4248         | 487.7160        | 957.3982       | 479.2028         | 956.4142       | 478.7107         | Q    | <b>1039.5129</b> | 520.2601        | 1022.4863      | 511.7468         | 1021.5023      | 511.2548         | 8  |
| 10 | 1103.4674        | 552.2373        | 1086.4408      | 543.7240         | 1085.4568      | 543.2320         | Q    | <b>911.4543</b>  | 456.2308        | 894.4277       | 447.7175         | 893.4437       | 447.2255         | 7  |
| 11 | 1216.5514        | 608.7794        | 1199.5249      | 600.2661         | 1198.5409      | 599.7741         | L    | <b>782.4117</b>  | 391.7095        | 765.3851       | 383.1962         | 764.4011       | 382.7042         | 6  |
| 12 | 1363.5868        | 682.2971        | 1346.5603      | 673.7838         | 1345.5763      | 673.2918         | M    | <b>669.3276</b>  | 335.1675        | 652.3011       | 326.6542         | 651.3171       | 326.1622         | 5  |
| 13 | 1492.6294        | 746.8184        | 1475.6029      | 738.3051         | 1474.6189      | 737.8131         | E    | <b>522.2922</b>  | 261.6498        | 505.2657       | 253.1365         | 504.2817       | 252.6445         | 4  |
| 14 | <b>1591.6978</b> | 796.3526        | 1574.6713      | 787.8393         | 1573.6873      | 787.3473         | V    | <b>393.2496</b>  | 197.1285        | 376.2231       | 188.6152         |                |                  | 3  |
| 15 | <b>1738.7663</b> | 869.8868        | 1721.7397      | 861.3735         | 1720.7557      | 860.8815         | F    | <b>294.1812</b>  | 147.5942        | 277.1547       | 139.0810         |                |                  | 2  |
| 16 |                  |                 |                |                  |                |                  | K    | 147.1128         | 74.0600         | 130.0863       | 65.5468          |                |                  | 1  |

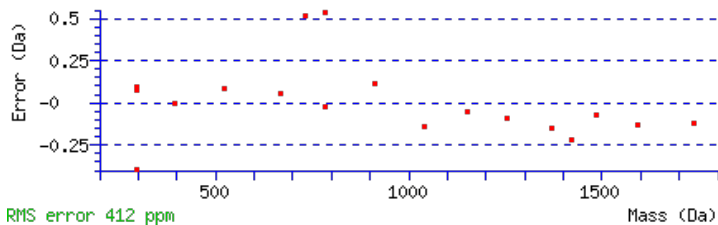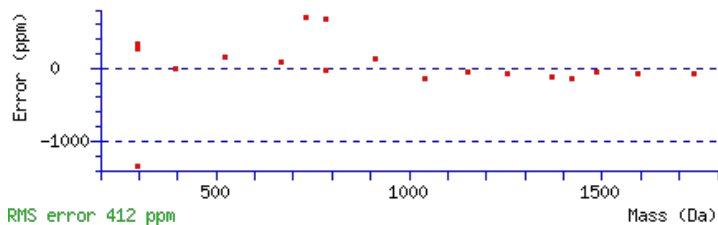

NCBI BLAST search of [LGACNDTLQQLMEVFK](#)

(Parameters: blastp, nr protein database, expect=20000, no filter, PAM30)

Other BLAST [web gateways](#)

All matches to this query

| Score | Mr(calc)  | Delta  | Sequence                          | Site Analysis             |
|-------|-----------|--------|-----------------------------------|---------------------------|
| 109.0 | 1883.8645 | 0.0051 | <a href="#">LGACNDTLQQLMEVFK</a>  | Deamidated N5, Q10 95.59% |
| 95.6  | 1883.8645 | 0.0051 | <a href="#">LGACNDTLQQLMEVFK</a>  | Deamidated N5, Q9 4.41%   |
| 58.8  | 1883.8645 | 0.0051 | <a href="#">LGACNDTLQQLMEVFK</a>  | Deamidated Q9, Q10 0.00%  |
| 24.2  | 1881.8699 | 1.9997 | <a href="#">DQNDQKLEKLMVQMK</a>   |                           |
| 24.2  | 1881.8699 | 1.9997 | <a href="#">DQNDQKLEKLMVQMK</a>   |                           |
| 24.2  | 1881.8699 | 1.9997 | <a href="#">DQNDQKLEKLMVQMK</a>   |                           |
| 10.4  | 1883.8683 | 0.0013 | <a href="#">SFPEGKSLGSEDSRNMK</a> |                           |
| 7.8   | 1882.8665 | 1.0031 | <a href="#">MRAAADTLQGPMQAAYR</a> |                           |
| 6.9   | 1881.8535 | 2.0160 | <a href="#">EMMPVWTEMITRGNR</a>   |                           |
| 6.8   | 1882.8665 | 1.0031 | <a href="#">MRAAADTLQGPMQAAYR</a> |                           |

Mascot: <http://www.matrixscience.com/>

# MASCOT SCIENCE Mascot Search Results

## Peptide View

MS/MS Fragmentation of **LGACNDTLQQLMEVFK**

Found in **P01008** in **con\_Xuniprot\_HUMAN3**, ANT3\_HUMAN Antithrombin-III OS=Homo sapiens GN=SERPINC1 PE=1 SV=1

Match to Query 11097: 1883.865048 from(942.939800,2+) intensity(17743.3887) rtinseconds(2234) scans(6067) index(17810)

Title: 111019\_Est\_MI\_YP\_G\_07Spectrum5236\_scans\_\_6067

Data file C:\\mascot\\20140703\_Tmgf\_1D\\CSV\_UseAnalysis\\MasterCSV\\All\_Glyco\\mgf\\ptm\\UC18ERLIC\_PTM\_35D.mgf

Click mouse within plot area to zoom in by factor of two about that point

Or, to Da

Label all possible matches Label matches used for scoring

Show Y-axis

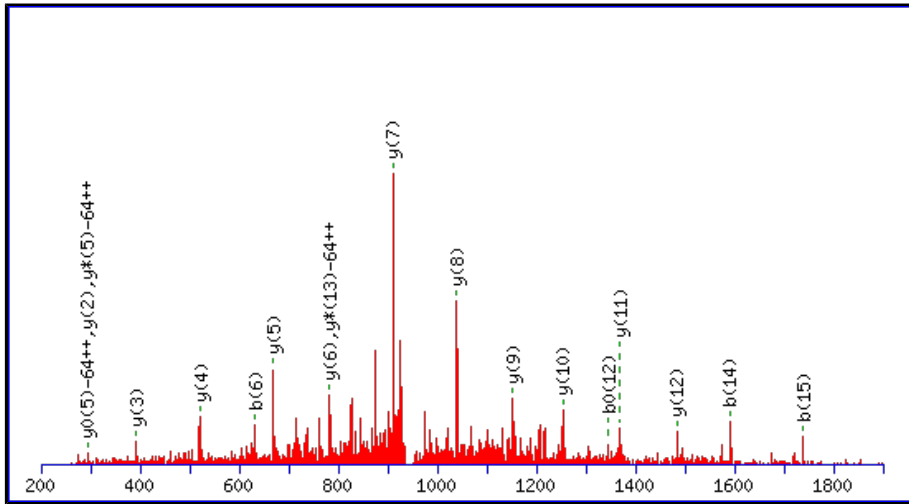

**Monoisotopic mass of neutral peptide Mr(calc):** 1883.8645

**Fixed modifications:** Carbamidomethyl (C) (apply to specified residues or termini only)

**Variable modifications:**

N5 : Deamidated (NQ)

Q9 : Deamidated (NQ)

M12 : Oxidation (M), with neutral losses 0.0000(shown in table), 63.9983

**Ions Score:** 108 **Expect:** 2.5e-009

**Matches:** 18/246 fragment ions using 16 most intense peaks ([help](#))

| #  | b                | b <sup>++</sup> | b <sup>*</sup> | b <sup>*++</sup> | b <sup>0</sup>   | b <sup>0++</sup> | Seq. | y                | y <sup>++</sup> | y <sup>*</sup> | y <sup>*++</sup> | y <sup>0</sup> | y <sup>0++</sup> | #  |
|----|------------------|-----------------|----------------|------------------|------------------|------------------|------|------------------|-----------------|----------------|------------------|----------------|------------------|----|
| 1  | 114.0913         | 57.5493         |                |                  |                  |                  | L    |                  |                 |                |                  |                |                  | 16 |
| 2  | 171.1128         | 86.0600         |                |                  |                  |                  | G    | 1771.7877        | 886.3975        | 1754.7612      | 877.8842         | 1753.7772      | 877.3922         | 15 |
| 3  | 242.1499         | 121.5786        |                |                  |                  |                  | A    | 1714.7663        | 857.8868        | 1697.7397      | 849.3735         | 1696.7557      | 848.8815         | 14 |
| 4  | 402.1806         | 201.5939        |                |                  |                  |                  | C    | 1643.7291        | 822.3682        | 1626.7026      | 813.8549         | 1625.7186      | 813.3629         | 13 |
| 5  | 517.2075         | 259.1074        | 500.1810       | 250.5941         |                  |                  | N    | <b>1483.6985</b> | 742.3529        | 1466.6719      | 733.8396         | 1465.6879      | 733.3476         | 12 |
| 6  | <b>632.2345</b>  | 316.6209        | 615.2079       | 308.1076         | 614.2239         | 307.6156         | D    | <b>1368.6715</b> | 684.8394        | 1351.6450      | 676.3261         | 1350.6610      | 675.8341         | 11 |
| 7  | 733.2821         | 367.1447        | 716.2556       | 358.6314         | 715.2716         | 358.1394         | T    | <b>1253.6446</b> | 627.3259        | 1236.6181      | 618.8127         | 1235.6340      | 618.3207         | 10 |
| 8  | 846.3662         | 423.6867        | 829.3396       | 415.1735         | 828.3556         | 414.6815         | L    | <b>1152.5969</b> | 576.8021        | 1135.5704      | 568.2888         | 1134.5864      | 567.7968         | 9  |
| 9  | 975.4088         | 488.2080        | 958.3822       | 479.6948         | 957.3982         | 479.2028         | Q    | <b>1039.5129</b> | 520.2601        | 1022.4863      | 511.7468         | 1021.5023      | 511.2548         | 8  |
| 10 | 1103.4674        | 552.2373        | 1086.4408      | 543.7240         | 1085.4568        | 543.2320         | Q    | <b>910.4703</b>  | 455.7388        | 893.4437       | 447.2255         | 892.4597       | 446.7335         | 7  |
| 11 | 1216.5514        | 608.7794        | 1199.5249      | 600.2661         | 1198.5409        | 599.7741         | L    | <b>782.4117</b>  | 391.7095        | 765.3851       | 383.1962         | 764.4011       | 382.7042         | 6  |
| 12 | 1363.5868        | 682.2971        | 1346.5603      | 673.7838         | <b>1345.5763</b> | 673.2918         | M    | <b>669.3276</b>  | 335.1675        | 652.3011       | 326.6542         | 651.3171       | 326.1622         | 5  |
| 13 | 1492.6294        | 746.8184        | 1475.6029      | 738.3051         | 1474.6189        | 737.8131         | E    | <b>522.2922</b>  | 261.6498        | 505.2657       | 253.1365         | 504.2817       | 252.6445         | 4  |
| 14 | <b>1591.6978</b> | 796.3526        | 1574.6713      | 787.8393         | 1573.6873        | 787.3473         | V    | <b>393.2496</b>  | 197.1285        | 376.2231       | 188.6152         |                |                  | 3  |
| 15 | <b>1738.7663</b> | 869.8868        | 1721.7397      | 861.3735         | 1720.7557        | 860.8815         | F    | <b>294.1812</b>  | 147.5942        | 277.1547       | 139.0810         |                |                  | 2  |
| 16 |                  |                 |                |                  |                  |                  | K    | 147.1128         | 74.0600         | 130.0863       | 65.5468          |                |                  | 1  |

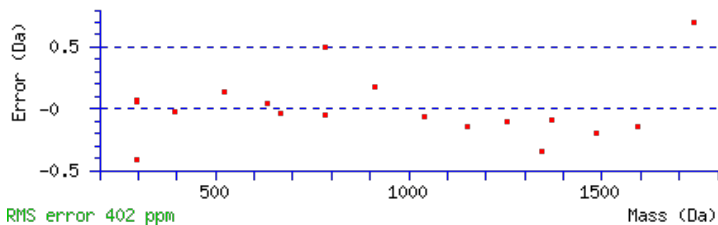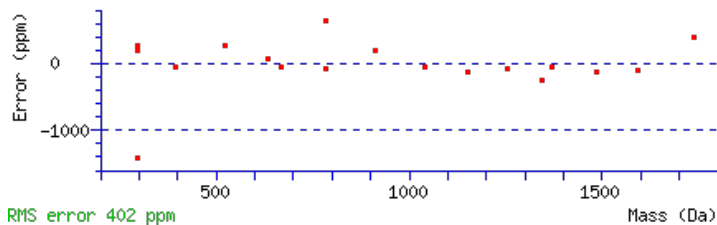

NCBI BLAST search of [LGACNDTLQQLMEVFK](#)

(Parameters: blastp, nr protein database, expect=20000, no filter, PAM30)

Other BLAST [web gateways](#)

**All matches to this query**

| Score | Mr(calc)  | Delta   | Sequence                          | Site Analysis            |
|-------|-----------|---------|-----------------------------------|--------------------------|
| 108.2 | 1883.8645 | 0.0006  | <a href="#">LGACNDTLQQLMEVFK</a>  | Deamidated N5, Q9 95.59% |
| 94.8  | 1883.8645 | 0.0006  | <a href="#">LGACNDTLQQLMEVFK</a>  | Deamidated N5, Q10 4.41% |
| 49.0  | 1883.8645 | 0.0006  | <a href="#">LGACNDTLQQLMEVFK</a>  | Deamidated Q9, Q10 0.00% |
| 34.6  | 1882.8539 | 1.0111  | <a href="#">DQNDQKLEKLMVQMK</a>   |                          |
| 7.4   | 1882.8584 | 1.0066  | <a href="#">KFDEFQKDLNTNEPR</a>   |                          |
| 6.7   | 1883.8683 | -0.0033 | <a href="#">SFPEGKSLGSEDSRNMK</a> |                          |
| 4.7   | 1881.8535 | 2.0115  | <a href="#">EMMPVWTEMITRGNR</a>   |                          |
| 4.4   | 1883.8584 | 0.0066  | <a href="#">EMDENSLHRNHIDEK</a>   |                          |
| 3.9   | 1882.8665 | 0.9985  | <a href="#">MRAAADTLQGPMQAAYR</a> |                          |
| 3.8   | 1882.8665 | 0.9985  | <a href="#">MRAAADTLQGPMQAAYR</a> |                          |

Mascot: <http://www.matrixscience.com/>

# MASCOT SCIENCE Mascot Search Results

## Peptide View

MS/MS Fragmentation of **LGACNDTLQQLMEVFKFDTISEK**

Found in **P01008** in **con\_Xuniprot\_HUMAN3**, ANT3\_HUMAN Antithrombin-III OS=Homo sapiens GN=SERPINC1 PE=1 SV=1

Match to Query 23836: 2687.292582 from(896.771470,3+) intensity(31208.8613) rtinseconds(2672) scans(7259) index(24200)

Title: 111019\_Est\_MI\_YS\_G\_05Spectrum6313\_scans\_\_7259

Data file C:\mascot\20140703\_Tmgf\_1D\CSV\_UseAnalysis\MasterCSV\All\_Glyco\mgf\ptm\UC18ERLIC\_PTM\_35D.mgf

Click mouse within plot area to zoom in by factor of two about that point

Or, to Da

Label all possible matches Label matches used for scoring

Show Y-axis

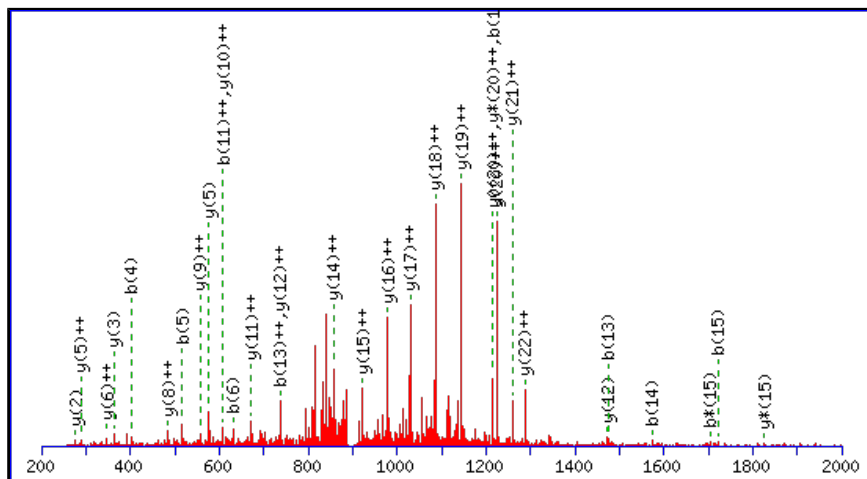

Monoisotopic mass of neutral peptide Mr(calc): 2687.2822

Fixed modifications: Carbamidomethyl (C) (apply to specified residues or termini only)

Variable modifications:

N5 : Deamidated (NQ)

Ions Score: 103 Expect: 1.5e-008

Matches : 33/244 fragment ions using 54 most intense peaks ([help](#))

| #  | b         | b <sup>++</sup> | b <sup>*</sup> | b <sup>*++</sup> | b <sup>0</sup> | b <sup>0++</sup> | Seq. | y         | y <sup>++</sup> | y <sup>*</sup> | y <sup>*++</sup> | y <sup>0</sup> | y <sup>0++</sup> | #  |
|----|-----------|-----------------|----------------|------------------|----------------|------------------|------|-----------|-----------------|----------------|------------------|----------------|------------------|----|
| 1  | 114.0913  | 57.5493         |                |                  |                |                  | L    |           |                 |                |                  |                |                  | 23 |
| 2  | 171.1128  | 86.0600         |                |                  |                |                  | G    | 2575.2055 | 1288.1064       | 2558.1789      | 1279.5931        | 2557.1949      | 1279.1011        | 22 |
| 3  | 242.1499  | 121.5786        |                |                  |                |                  | A    | 2518.1840 | 1259.5956       | 2501.1575      | 1251.0824        | 2500.1734      | 1250.5904        | 21 |
| 4  | 402.1806  | 201.5939        |                |                  |                |                  | C    | 2447.1469 | 1224.0771       | 2430.1203      | 1215.5638        | 2429.1363      | 1215.0718        | 20 |
| 5  | 517.2075  | 259.1074        | 500.1810       | 250.5941         |                |                  | N    | 2287.1162 | 1144.0618       | 2270.0897      | 1135.5485        | 2269.1057      | 1135.0565        | 19 |
| 6  | 632.2345  | 316.6209        | 615.2079       | 308.1076         | 614.2239       | 307.6156         | D    | 2172.0893 | 1086.5483       | 2155.0628      | 1078.0350        | 2154.0787      | 1077.5430        | 18 |
| 7  | 733.2821  | 367.1447        | 716.2556       | 358.6314         | 715.2716       | 358.1394         | T    | 2057.0624 | 1029.0348       | 2040.0358      | 1020.5215        | 2039.0518      | 1020.0295        | 17 |
| 8  | 846.3662  | 423.6867        | 829.3396       | 415.1735         | 828.3556       | 414.6815         | L    | 1956.0147 | 978.5110        | 1938.9881      | 969.9977         | 1938.0041      | 969.5057         | 16 |
| 9  | 974.4248  | 487.7160        | 957.3982       | 479.2028         | 956.4142       | 478.7107         | Q    | 1842.9306 | 921.9689        | 1825.9041      | 913.4557         | 1824.9200      | 912.9637         | 15 |
| 10 | 1102.4834 | 551.7453        | 1085.4568      | 543.2320         | 1084.4728      | 542.7400         | Q    | 1714.8720 | 857.9397        | 1697.8455      | 849.4264         | 1696.8615      | 848.9344         | 14 |
| 11 | 1215.5674 | 608.2873        | 1198.5409      | 599.7741         | 1197.5569      | 599.2821         | L    | 1586.8135 | 793.9104        | 1569.7869      | 785.3971         | 1568.8029      | 784.9051         | 13 |
| 12 | 1346.6079 | 673.8076        | 1329.5814      | 665.2943         | 1328.5973      | 664.8023         | M    | 1473.7294 | 737.3683        | 1456.7028      | 728.8551         | 1455.7188      | 728.3631         | 12 |
| 13 | 1475.6505 | 738.3289        | 1458.6239      | 729.8156         | 1457.6399      | 729.3236         | E    | 1342.6889 | 671.8481        | 1325.6624      | 663.3348         | 1324.6783      | 662.8428         | 11 |
| 14 | 1574.7189 | 787.8631        | 1557.6924      | 779.3498         | 1556.7083      | 778.8578         | V    | 1213.6463 | 607.3268        | 1196.6198      | 598.8135         | 1195.6358      | 598.3215         | 10 |
| 15 | 1721.7873 | 861.3973        | 1704.7608      | 852.8840         | 1703.7768      | 852.3920         | F    | 1114.5779 | 557.7926        | 1097.5514      | 549.2793         | 1096.5673      | 548.7873         | 9  |
| 16 | 1849.8823 | 925.4448        | 1832.8557      | 916.9315         | 1831.8717      | 916.4395         | K    | 967.5095  | 484.2584        | 950.4829       | 475.7451         | 949.4989       | 475.2531         | 8  |
| 17 | 1996.9507 | 998.9790        | 1979.9242      | 990.4657         | 1978.9401      | 989.9737         | F    | 839.4145  | 420.2109        | 822.3880       | 411.6976         | 821.4040       | 411.2056         | 7  |
| 18 | 2111.9776 | 1056.4925       | 2094.9511      | 1047.9792        | 2093.9671      | 1047.4872        | D    | 692.3461  | 346.6767        | 675.3196       | 338.1634         | 674.3355       | 337.6714         | 6  |
| 19 | 2213.0253 | 1107.0163       | 2195.9988      | 1098.5030        | 2195.0148      | 1098.0110        | T    | 577.3192  | 289.1632        | 560.2926       | 280.6499         | 559.3086       | 280.1579         | 5  |
| 20 | 2326.1094 | 1163.5583       | 2309.0828      | 1155.0451        | 2308.0988      | 1154.5530        | I    | 476.2715  | 238.6394        | 459.2449       | 230.1261         | 458.2609       | 229.6341         | 4  |
| 21 | 2413.1414 | 1207.0743       | 2396.1149      | 1198.5611        | 2395.1308      | 1198.0691        | S    | 363.1874  | 182.0974        | 346.1609       | 173.5841         | 345.1769       | 173.0921         | 3  |
| 22 | 2542.1840 | 1271.5956       | 2525.1575      | 1263.0824        | 2524.1734      | 1262.5904        | E    | 276.1554  | 138.5813        | 259.1288       | 130.0681         | 258.1448       | 129.5761         | 2  |
| 23 |           |                 |                |                  |                |                  | K    | 147.1128  | 74.0600         | 130.0863       | 65.5468          |                |                  | 1  |



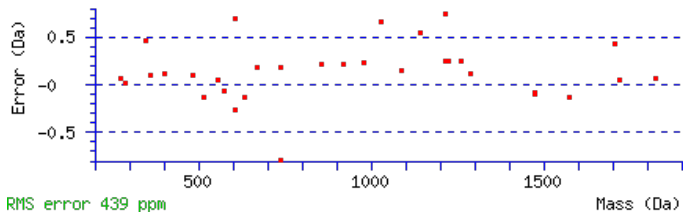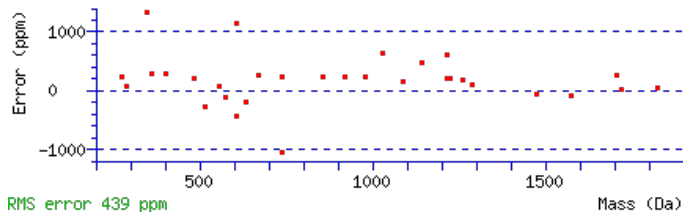

NCBI **BLAST** search of [LGACNDTLQQLMEVFKFDTISEK](#)  
 (Parameters: blastp, nr protein database, expect=20000, no filter, PAM30)  
 Other BLAST [web gateways](#)

**All matches to this query**

| Score | Mr(calc)  | Delta   | Sequence                                   | Site Analysis         |
|-------|-----------|---------|--------------------------------------------|-----------------------|
| 102.6 | 2687.2822 | 0.0103  | <a href="#">LGACNDTLQQLMEVFKFDTISEK</a>    | Deamidated N5 50.30%  |
| 100.5 | 2687.2822 | 0.0103  | <a href="#">LGACNDTLQQLMEVFKFDTISEK</a>    | Deamidated Q10 30.66% |
| 98.4  | 2687.2822 | 0.0103  | <a href="#">LGACNDTLQQLMEVFKFDTISEK</a>    | Deamidated Q9 19.04%  |
| 85.0  | 2686.2982 | 0.9943  | <a href="#">LGACNDTLQQLMEVFKFDTISEK</a>    |                       |
| 7.5   | 2687.2789 | 0.0137  | <a href="#">VPQIHDYLFDPQLNDVCLELTR</a>     |                       |
| 6.1   | 2686.2756 | 1.0170  | <a href="#">DEQSGGGNVSSSTLLKQHLSLEPCTK</a> |                       |
| 5.1   | 2686.2756 | 1.0170  | <a href="#">DEQSGGGNVSSSTLLKQHLSLEPCTK</a> |                       |
| 5.0   | 2687.3007 | -0.0081 | <a href="#">LQEGMRADPGVLAALCEKTDNDIR</a>   |                       |
| 4.3   | 2687.2885 | 0.0040  | <a href="#">GODSEESOEIQLAGRIPTGGSRLQK</a>  |                       |
| 3.0   | 2687.2813 | 0.0113  | <a href="#">ESIHEEIEFVEGSTININGAEIGAK</a>  |                       |

Mascot: <http://www.matrixscience.com/>

# MATRIX SCIENCE Mascot Search Results

## Peptide View

MS/MS Fragmentation of **AAINKWVSNKTEGR**

Found in **P01008** in **con\_Xuniprot\_HUMAN3**, ANT3\_HUMAN Antithrombin-III OS=Homo sapiens GN=SERPINC1 PE=1 SV=1

Match to Query 7409: 1573.822368 from(787.918460,2+) intensity(16921.1543) rtinseconds(485) scans(1017) index(22475)

Title: 111019\_Est\_MI\_YS\_G\_03Spectrum851\_scans\_\_1017

Data file C:\\mascot\\20140703\_Tmgf\_1D\\CSV\_UseAnalysis\\MasterCSV\\All\_Glyco\\mgf\\ptm\\UC18ERLIC\_PTM\_35D.mgf

Click mouse within plot area to zoom in by factor of two about that point

Or, to Da

Label all possible matches Label matches used for scoring

Show Y-axis

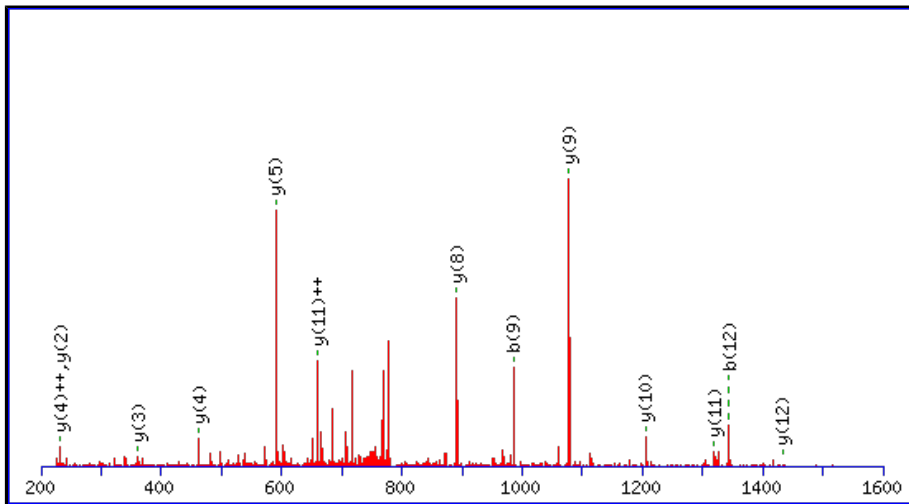

Monoisotopic mass of neutral peptide Mr(calc): 1573.8212

Fixed modifications: Carbamidomethyl (C) (apply to specified residues or termini only)

Variable modifications:

N9 : Deamidated (NQ)

Ions Score: 94 Expect: 8.6e-008

Matches : 13/132 fragment ions using 13 most intense peaks ([help](#))

| #  | b                | b <sup>++</sup> | b <sup>*</sup> | b <sup>*++</sup> | b <sup>0</sup> | b <sup>0++</sup> | Seq. | y                | y <sup>++</sup> | y <sup>*</sup> | y <sup>*++</sup> | y <sup>0</sup> | y <sup>0++</sup> | #  |
|----|------------------|-----------------|----------------|------------------|----------------|------------------|------|------------------|-----------------|----------------|------------------|----------------|------------------|----|
| 1  | 72.0444          | 36.5258         |                |                  |                |                  | A    |                  |                 |                |                  |                |                  | 14 |
| 2  | 143.0815         | 72.0444         |                |                  |                |                  | A    | 1503.7914        | 752.3993        | 1486.7649      | 743.8861         | 1485.7809      | 743.3941         | 13 |
| 3  | 256.1656         | 128.5864        |                |                  |                |                  | I    | <b>1432.7543</b> | 716.8808        | 1415.7278      | 708.3675         | 1414.7437      | 707.8755         | 12 |
| 4  | 370.2085         | 185.6079        | 353.1819       | 177.0946         |                |                  | N    | <b>1319.6702</b> | <b>660.3388</b> | 1302.6437      | 651.8255         | 1301.6597      | 651.3335         | 11 |
| 5  | 498.3035         | 249.6554        | 481.2769       | 241.1421         |                |                  | K    | <b>1205.6273</b> | 603.3173        | 1188.6008      | 594.8040         | 1187.6167      | 594.3120         | 10 |
| 6  | 684.3828         | 342.6950        | 667.3562       | 334.1817         |                |                  | W    | <b>1077.5323</b> | 539.2698        | 1060.5058      | 530.7565         | 1059.5218      | 530.2645         | 9  |
| 7  | 783.4512         | 392.2292        | 766.4246       | 383.7160         |                |                  | V    | <b>891.4530</b>  | 446.2302        | 874.4265       | 437.7169         | 873.4425       | 437.2249         | 8  |
| 8  | 870.4832         | 435.7452        | 853.4567       | 427.2320         | 852.4726       | 426.7400         | S    | 792.3846         | 396.6959        | 775.3581       | 388.1827         | 774.3741       | 387.6907         | 7  |
| 9  | <b>985.5102</b>  | 493.2587        | 968.4836       | 484.7454         | 967.4996       | 484.2534         | N    | 705.3526         | 353.1799        | 688.3260       | 344.6667         | 687.3420       | 344.1747         | 6  |
| 10 | 1113.6051        | 557.3062        | 1096.5786      | 548.7929         | 1095.5946      | 548.3009         | K    | <b>590.3257</b>  | 295.6665        | 573.2991       | 287.1532         | 572.3151       | 286.6612         | 5  |
| 11 | 1214.6528        | 607.8300        | 1197.6262      | 599.3168         | 1196.6422      | 598.8248         | T    | <b>462.2307</b>  | <b>231.6190</b> | 445.2041       | 223.1057         | 444.2201       | 222.6137         | 4  |
| 12 | <b>1343.6954</b> | 672.3513        | 1326.6688      | 663.8381         | 1325.6848      | 663.3461         | E    | <b>361.1830</b>  | 181.0951        | 344.1565       | 172.5819         | 343.1724       | 172.0899         | 3  |
| 13 | 1400.7169        | 700.8621        | 1383.6903      | 692.3488         | 1382.7063      | 691.8568         | G    | <b>232.1404</b>  | 116.5738        | 215.1139       | 108.0606         |                |                  | 2  |
| 14 |                  |                 |                |                  |                |                  | R    | 175.1190         | 88.0631         | 158.0924       | 79.5498          |                |                  | 1  |

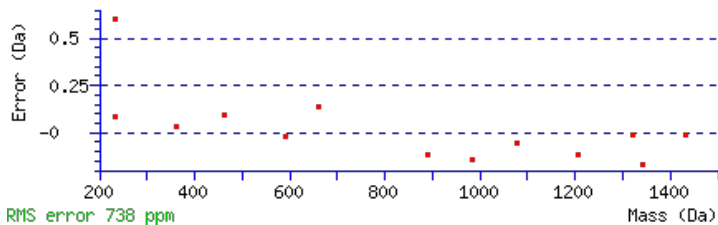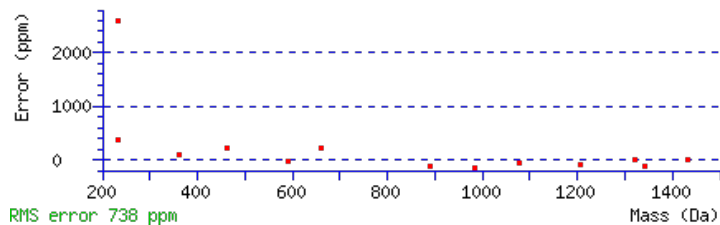

NCBI BLAST search of [AAINKWVSNKTEGR](#)

(Parameters: blastp, nr protein database, expect=20000, no filter, PAM30)

Other BLAST [web gateways](#)

**All matches to this query**

| Score | Mr(calc)  | Delta   | Sequence                         | Site Analysis         |
|-------|-----------|---------|----------------------------------|-----------------------|
| 94.1  | 1573.8212 | 0.0012  | <a href="#">AAINKWVSNKTEGR</a>   | Deamidated N9 100.00% |
| 41.3  | 1573.8212 | 0.0012  | <a href="#">AAINKWVSNKTEGR</a>   | Deamidated N4 0.00%   |
| 18.6  | 1573.8246 | -0.0022 | <a href="#">QNMSKSLTLKNPGR</a>   |                       |
| 18.6  | 1573.8246 | -0.0022 | <a href="#">QNMSKSLTLKNPGR</a>   |                       |
| 11.5  | 1573.8246 | -0.0022 | <a href="#">AALNQALEMKROGK</a>   |                       |
| 8.7   | 1573.8174 | 0.0050  | <a href="#">LAAIEQGTVLNWMK</a>   |                       |
| 5.7   | 1573.8174 | 0.0050  | <a href="#">LAAIEQGTVLNWMK</a>   |                       |
| 4.2   | 1572.8181 | 1.0042  | <a href="#">GSSVGVSQVIANPMVK</a> |                       |
| 3.9   | 1573.8246 | -0.0022 | <a href="#">AALNQALEMKROGK</a>   |                       |
| 1.6   | 1573.8286 | -0.0062 | <a href="#">AAIEIFKGLCQPAR</a>   |                       |

Mascot: <http://www.matrixscience.com/>

# MATRIX SCIENCE Mascot Search Results

## Peptide View

MS/MS Fragmentation of **SLTFNETYQDISELVYGAK**

Found in **P01008** in **con\_Xuniprot\_HUMAN3**, ANT3\_HUMAN Antithrombin-III OS=Homo sapiens GN=SERPINC1 PE=1 SV=1

Match to Query 14464: 2178.037508 from(1090.026030,2+) intensity(5959.0059) rtinseconds(2626) scans(6749) index(5714)

Title: 111019\_Est\_ISCardio\_NMI\_YP\_G\_8Spectrum5963\_scans\_\_6749

Data file C:\mascot\20140703\_Tmgf\_1D\CSV\_UseAnalysis\MasterCSV\All\_Glyco\mgf\ptm\UC18ERLIC\_PTM\_35D.mgf

Click mouse within plot area to zoom in by factor of two about that point

Or, to Da

Label all possible matches Label matches used for scoring

Show Y-axis

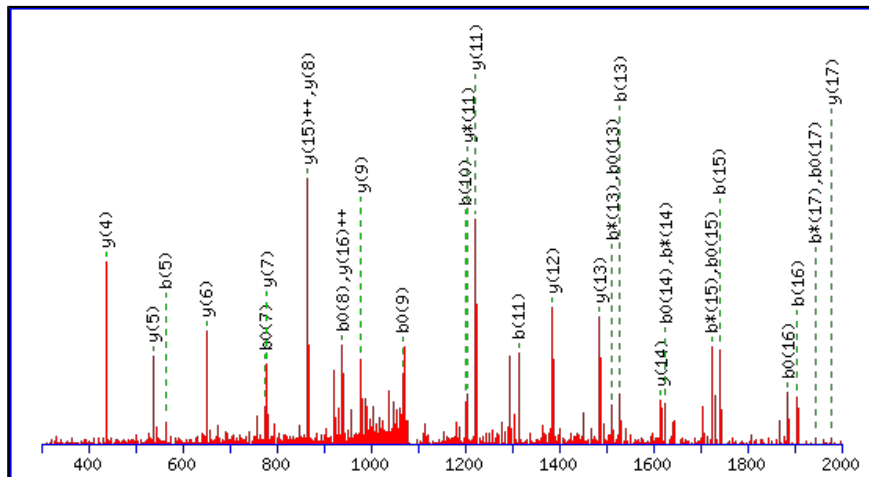

Monoisotopic mass of neutral peptide Mr(calc): 2178.0368

Fixed modifications: Carbamidomethyl (C) (apply to specified residues or termini only)

Variable modifications:

N5 : Deamidated (NQ)

Ions Score: 85 Expect: 6.9e-007

Matches : 32/196 fragment ions using 34 most intense peaks ([help](#))

| #  | b                | b <sup>++</sup> | b <sup>*</sup>   | b <sup>*++</sup> | b <sup>0</sup>   | b <sup>0++</sup> | Seq. | y                | y <sup>++</sup> | y <sup>*</sup>   | y <sup>*++</sup> | y <sup>0</sup> | y <sup>0++</sup> | #  |
|----|------------------|-----------------|------------------|------------------|------------------|------------------|------|------------------|-----------------|------------------|------------------|----------------|------------------|----|
| 1  | 88.0393          | 44.5233         |                  |                  | 70.0287          | 35.5180          | S    |                  |                 |                  |                  |                |                  | 19 |
| 2  | 201.1234         | 101.0653        |                  |                  | 183.1128         | 92.0600          | L    | 2092.0121        | 1046.5097       | 2074.9855        | 1037.9964        | 2074.0015      | 1037.5044        | 18 |
| 3  | 302.1710         | 151.5892        |                  |                  | 284.1605         | 142.5839         | T    | <b>1978.9280</b> | 989.9677        | 1961.9015        | 981.4544         | 1960.9175      | 980.9624         | 17 |
| 4  | 449.2395         | 225.1234        |                  |                  | 431.2289         | 216.1181         | F    | 1877.8804        | <b>939.4438</b> | 1860.8538        | 930.9305         | 1859.8698      | 930.4385         | 16 |
| 5  | <b>564.2664</b>  | 282.6368        | 547.2399         | 274.1236         | 546.2558         | 273.6316         | N    | 1730.8119        | <b>865.9096</b> | 1713.7854        | 857.3963         | 1712.8014      | 856.9043         | 15 |
| 6  | 693.3090         | 347.1581        | 676.2824         | 338.6449         | 675.2984         | 338.1529         | E    | <b>1615.7850</b> | 808.3961        | 1598.7584        | 799.8829         | 1597.7744      | 799.3909         | 14 |
| 7  | 794.3567         | 397.6820        | 777.3301         | 389.1687         | <b>776.3461</b>  | 388.6767         | T    | <b>1486.7424</b> | 743.8748        | 1469.7159        | 735.3616         | 1468.7318      | 734.8696         | 13 |
| 8  | 957.4200         | 479.2136        | 940.3935         | 470.7004         | <b>939.4094</b>  | 470.2084         | Y    | <b>1385.6947</b> | 693.3510        | 1368.6682        | 684.8377         | 1367.6842      | 684.3457         | 12 |
| 9  | 1085.4786        | 543.2429        | 1068.4520        | 534.7297         | <b>1067.4680</b> | 534.2376         | Q    | <b>1222.6314</b> | 611.8193        | <b>1205.6048</b> | 603.3061         | 1204.6208      | 602.8141         | 11 |
| 10 | <b>1200.5055</b> | 600.7564        | 1183.4790        | 592.2431         | 1182.4950        | 591.7511         | D    | 1094.5728        | 547.7900        | 1077.5463        | 539.2768         | 1076.5623      | 538.7848         | 10 |
| 11 | <b>1313.5896</b> | 657.2984        | 1296.5630        | 648.7852         | 1295.5790        | 648.2932         | I    | <b>979.5459</b>  | 490.2766        | 962.5193         | 481.7633         | 961.5353       | 481.2713         | 9  |
| 12 | 1400.6216        | 700.8144        | 1383.5951        | 692.3012         | 1382.6111        | 691.8092         | S    | <b>866.4618</b>  | 433.7345        | 849.4353         | 425.2213         | 848.4512       | 424.7293         | 8  |
| 13 | <b>1529.6642</b> | 765.3357        | <b>1512.6377</b> | 756.8225         | <b>1511.6536</b> | 756.3305         | E    | <b>779.4298</b>  | 390.2185        | 762.4032         | 381.7053         | 761.4192       | 381.2132         | 7  |
| 14 | 1642.7483        | 821.8778        | <b>1625.7217</b> | 813.3645         | <b>1624.7377</b> | 812.8725         | L    | <b>650.3872</b>  | 325.6972        | 633.3606         | 317.1840         |                |                  | 6  |
| 15 | <b>1741.8167</b> | 871.4120        | <b>1724.7901</b> | 862.8987         | <b>1723.8061</b> | 862.4067         | V    | <b>537.3031</b>  | 269.1552        | 520.2766         | 260.6419         |                |                  | 5  |
| 16 | <b>1904.8800</b> | 952.9436        | 1887.8535        | 944.4304         | <b>1886.8695</b> | 943.9384         | Y    | <b>438.2347</b>  | 219.6210        | 421.2082         | 211.1077         |                |                  | 4  |
| 17 | 1961.9015        | 981.4544        | <b>1944.8749</b> | 972.9411         | <b>1943.8909</b> | 972.4491         | G    | 275.1714         | 138.0893        | 258.1448         | 129.5761         |                |                  | 3  |
| 18 | 2032.9386        | 1016.9729       | 2015.9120        | 1008.4597        | 2014.9280        | 1007.9677        | A    | 218.1499         | 109.5786        | 201.1234         | 101.0653         |                |                  | 2  |
| 19 |                  |                 |                  |                  |                  |                  | K    | 147.1128         | 74.0600         | 130.0863         | 65.5468          |                |                  | 1  |

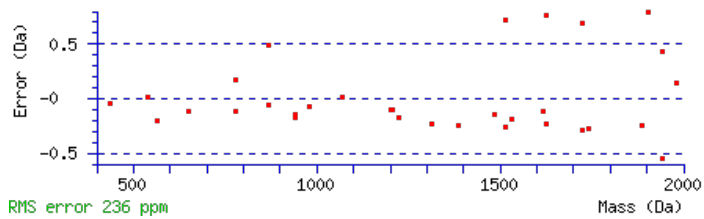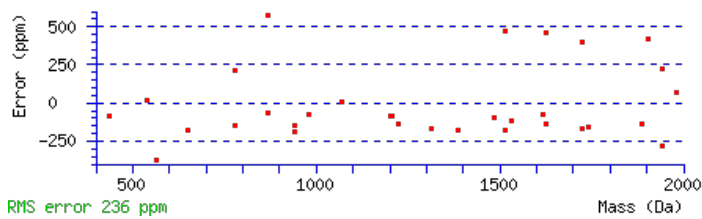

NCBI **BLAST** search of [SLTFNETYQDISSELVYGAK](#)

(Parameters: blastp, nr protein database, expect=20000, no filter, PAM30)

Other BLAST [web gateways](#)

**All matches to this query**

| Score | Mr(calc)  | Delta  | Sequence                             | Site Analysis        |
|-------|-----------|--------|--------------------------------------|----------------------|
| 85.4  | 2178.0368 | 0.0007 | <a href="#">SLTFNETYQDISSELVYGAK</a> | Deamidated N5 98.86% |
| 66.0  | 2178.0368 | 0.0007 | <a href="#">SLTFNETYQDISSELVYGAK</a> | Deamidated Q9 1.14%  |
| 1.0   | 2176.0259 | 2.0116 | <a href="#">DVDISNFFCDPSQLLHLR</a>   |                      |

Mascot: <http://www.matrixscience.com/>

# MASCOT SCIENCE Mascot Search Results

## Peptide View

MS/MS Fragmentation of **LGACNDTLQQLMEVFKFDTISEK**

Found in **P01008** in **con\_Xuniprot\_HUMAN3**, ANT3\_HUMAN Antithrombin-III OS=Homo sapiens GN=SERPINC1 PE=1 SV=1

Match to Query 25360: 2703.288492 from(902.103440,3+) intensity(59493.2109) rtinseconds(2430) scans(6441) index(16248)

Title: 111019\_Est\_ML\_YP\_G\_05Spectrum5517\_scans\_\_6441

Data file C:\mascot\20140703\_Tmgf\_1D\CSV\_UseAnalysis\MasterCSV\All\_Glyco\mgf\ptm\UC18ERLIC\_PTM\_35D.mgf

Click mouse within plot area to zoom in by factor of two about that point

Or, to Da

Label all possible matches Label matches used for scoring

Show Y-axis

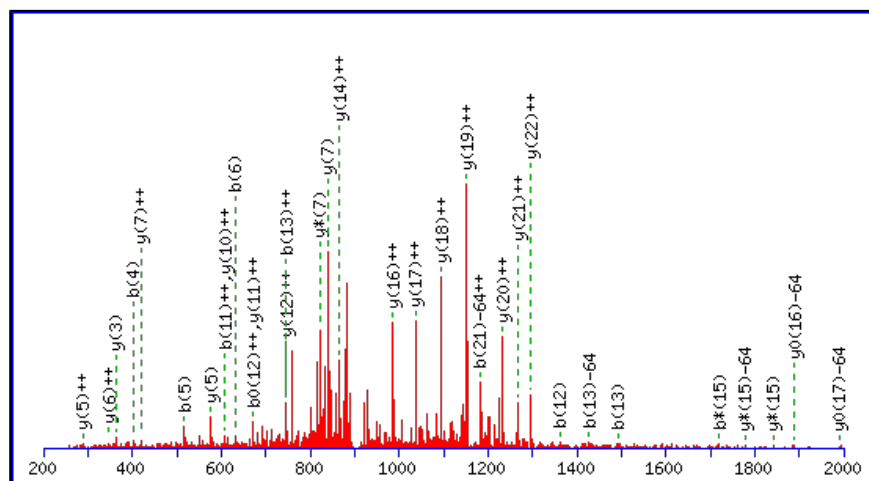

Monoisotopic mass of neutral peptide Mr(calc): 2703.2772

Fixed modifications: Carbamidomethyl (C) (apply to specified residues or termini only)

Variable modifications:

N5 : Deamidated (NQ)

M12 : Oxidation (M), with neutral losses 0.0000(shown in table), 63.9983

Ions Score: 79 Expect: 3.2e-006

Matches : 33/376 fragment ions using 53 most intense peaks ([help](#))

| #  | b         | b <sup>++</sup> | b <sup>*</sup> | b <sup>*++</sup> | b <sup>0</sup> | b <sup>0++</sup> | Seq. | y         | y <sup>++</sup> | y <sup>*</sup> | y <sup>*++</sup> | y <sup>0</sup> | y <sup>0++</sup> | #  |
|----|-----------|-----------------|----------------|------------------|----------------|------------------|------|-----------|-----------------|----------------|------------------|----------------|------------------|----|
| 1  | 114.0913  | 57.5493         |                |                  |                |                  | L    |           |                 |                |                  |                |                  | 23 |
| 2  | 171.1128  | 86.0600         |                |                  |                |                  | G    | 2591.2004 | 1296.1038       | 2574.1738      | 1287.5906        | 2573.1898      | 1287.0985        | 22 |
| 3  | 242.1499  | 121.5786        |                |                  |                |                  | A    | 2534.1789 | 1267.5931       | 2517.1524      | 1259.0798        | 2516.1684      | 1258.5878        | 21 |
| 4  | 402.1806  | 201.5939        |                |                  |                |                  | C    | 2463.1418 | 1232.0745       | 2446.1153      | 1223.5613        | 2445.1312      | 1223.0693        | 20 |
| 5  | 517.2075  | 259.1074        | 500.1810       | 250.5941         |                |                  | N    | 2303.1112 | 1152.0592       | 2286.0846      | 1143.5459        | 2285.1006      | 1143.0539        | 19 |
| 6  | 632.2345  | 316.6209        | 615.2079       | 308.1076         | 614.2239       | 307.6156         | D    | 2188.0842 | 1094.5457       | 2171.0577      | 1086.0325        | 2170.0736      | 1085.5405        | 18 |
| 7  | 733.2821  | 367.1447        | 716.2556       | 358.6314         | 715.2716       | 358.1394         | T    | 2073.0573 | 1037.0323       | 2056.0307      | 1028.5190        | 2055.0467      | 1028.0270        | 17 |
| 8  | 846.3662  | 423.6867        | 829.3396       | 415.1735         | 828.3556       | 414.6815         | L    | 1972.0096 | 986.5084        | 1954.9830      | 977.9952         | 1953.9990      | 977.5032         | 16 |
| 9  | 974.4248  | 487.7160        | 957.3982       | 479.2028         | 956.4142       | 478.7107         | Q    | 1858.9255 | 929.9664        | 1841.8990      | 921.4531         | 1840.9150      | 920.9611         | 15 |
| 10 | 1102.4834 | 551.7453        | 1085.4568      | 543.2320         | 1084.4728      | 542.7400         | Q    | 1730.8670 | 865.9371        | 1713.8404      | 857.4238         | 1712.8564      | 856.9318         | 14 |
| 11 | 1215.5674 | 608.2873        | 1198.5409      | 599.7741         | 1197.5569      | 599.2821         | L    | 1602.8084 | 801.9078        | 1585.7818      | 793.3946         | 1584.7978      | 792.9025         | 13 |
| 12 | 1362.6028 | 681.8050        | 1345.5763      | 673.2918         | 1344.5923      | 672.7998         | M    | 1489.7243 | 745.3658        | 1472.6978      | 736.8525         | 1471.7137      | 736.3605         | 12 |
| 13 | 1491.6454 | 746.3263        | 1474.6189      | 737.8131         | 1473.6348      | 737.3211         | E    | 1342.6889 | 671.8481        | 1325.6624      | 663.3348         | 1324.6783      | 662.8428         | 11 |
| 14 | 1590.7138 | 795.8605        | 1573.6873      | 787.3473         | 1572.7033      | 786.8553         | V    | 1213.6463 | 607.3268        | 1196.6198      | 598.8135         | 1195.6358      | 598.3215         | 10 |
| 15 | 1737.7822 | 869.3948        | 1720.7557      | 860.8815         | 1719.7717      | 860.3895         | F    | 1114.5779 | 557.7926        | 1097.5514      | 549.2793         | 1096.5673      | 548.7873         | 9  |
| 16 | 1865.8772 | 933.4422        | 1848.8507      | 924.9290         | 1847.8666      | 924.4370         | K    | 967.5095  | 484.2584        | 950.4829       | 475.7451         | 949.4989       | 475.2531         | 8  |
| 17 | 2012.9456 | 1006.9764       | 1995.9191      | 998.4632         | 1994.9350      | 997.9712         | F    | 839.4145  | 420.2109        | 822.3880       | 411.6976         | 821.4040       | 411.2056         | 7  |
| 18 | 2127.9726 | 1064.4899       | 2110.9460      | 1055.9766        | 2109.9620      | 1055.4846        | D    | 692.3461  | 346.6767        | 675.3196       | 338.1634         | 674.3355       | 337.6714         | 6  |
| 19 | 2229.0202 | 1115.0138       | 2211.9937      | 1106.5005        | 2211.0097      | 1106.0085        | T    | 577.3192  | 289.1632        | 560.2926       | 280.6499         | 559.3086       | 280.1579         | 5  |
| 20 | 2342.1043 | 1171.5558       | 2325.0778      | 1163.0425        | 2324.0937      | 1162.5505        | I    | 476.2715  | 238.6394        | 459.2449       | 230.1261         | 458.2609       | 229.6341         | 4  |
| 21 | 2429.1363 | 1215.0718       | 2412.1098      | 1206.5585        | 2411.1258      | 1206.0665        | S    | 363.1874  | 182.0974        | 346.1609       | 173.5841         | 345.1769       | 173.0921         | 3  |
| 22 | 2558.1789 | 1279.5931       | 2541.1524      | 1271.0798        | 2540.1684      | 1270.5878        | E    | 276.1554  | 138.5813        | 259.1288       | 130.0681         | 258.1448       | 129.5761         | 2  |

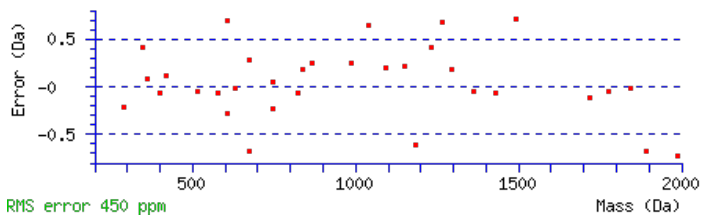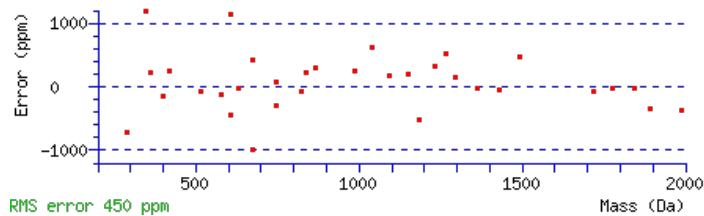

NCBI BLAST search of [LGACNDTLQQLMEVFKFDTISEK](#)

(Parameters: blastp, nr protein database, expect=20000, no filter, PAM30)

Other BLAST [web gateways](#)

All matches to this query

| Score | Mr(calc)  | Delta   | Sequence                                  | Site Analysis         |
|-------|-----------|---------|-------------------------------------------|-----------------------|
| 79.0  | 2703.2772 | 0.0113  | <a href="#">LGACNDTLQQLMEVFKFDTISEK</a>   | Deamidated N5 36.90%  |
| 78.3  | 2703.2772 | 0.0113  | <a href="#">LGACNDTLQQLMEVFKFDTISEK</a>   | Deamidated Q10 31.55% |
| 78.3  | 2703.2772 | 0.0113  | <a href="#">LGACNDTLQQLMEVFKFDTISEK</a>   | Deamidated Q9 31.55%  |
| 51.1  | 2702.2932 | 0.9953  | <a href="#">LGACNDTLQQLMEVFKFDTISEK</a>   |                       |
| 8.4   | 2703.2987 | -0.0102 | <a href="#">ENDEAQSGQDAVPESPSKLSSKRPK</a> |                       |
| 7.6   | 2702.2792 | 1.0093  | <a href="#">MDALFMDLPTGPRGQQAQPQRAEK</a>  |                       |
| 7.3   | 2701.2905 | 1.9980  | <a href="#">SSSHDPNSQTLDISPSKEPFMLVGK</a> |                       |
| 5.0   | 2703.2987 | -0.0102 | <a href="#">ENDEAQSGQDAVPESPSKLSSKRPK</a> |                       |
| 5.0   | 2703.2987 | -0.0102 | <a href="#">ENDEAQSGQDAVPESPSKLSSKRPK</a> |                       |
| 4.1   | 2702.2792 | 1.0093  | <a href="#">MDALFMDLPTGPRGQQAQPQRAEK</a>  |                       |

Mascot: <http://www.matrixscience.com/>



# MASCOT SCIENCE Mascot Search Results

## Peptide View

MS/MS Fragmentation of **LFGDKSLTFNETYQDISELVYGAK**

Found in **P01008** in **con\_Xuniprot\_HUMAN3**, ANT3\_HUMAN Antithrombin-III OS=Homo sapiens GN=SERPINC1 PE=1 SV=1

Match to Query 25458: 2738.339592 from(913.787140,3+) intensity(29754.5840) rtinseconds(2648) scans(6971) index(24901)

Title: 111019\_Est\_ML\_YS\_G\_06Spectrum6087\_scans\_\_6971

Data file C:\mascot\20140703\_Tmgf\_1D\CSV\_UseAnalysis\MasterCSV\All\_Glyco\mgf\ptm\UC18ERLIC\_PTM\_35D.mgf

Click mouse within plot area to zoom in by factor of two about that point

Or, to Da

Label all possible matches Label matches used for scoring

Show Y-axis

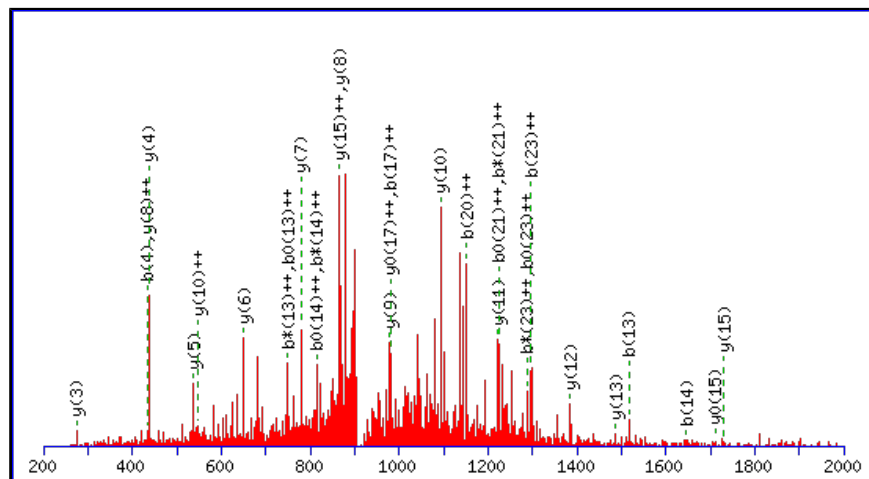

Monoisotopic mass of neutral peptide Mr(calc): 2738.3327

Fixed modifications: Carbamidomethyl (C) (apply to specified residues or termini only)

Variable modifications:

N10 : Deamidated (NQ)

Ions Score: 52 Expect: 0.0019

Matches : 31/250 fragment ions using 54 most intense peaks ([help](#))

| #  | b                | b <sup>++</sup>  | b*        | b <sup>*++</sup> | b <sup>0</sup> | b <sup>0++</sup> | Seq. | y                | y <sup>++</sup> | y*        | y <sup>*++</sup> | y <sup>0</sup>   | y <sup>0++</sup> | #  |
|----|------------------|------------------|-----------|------------------|----------------|------------------|------|------------------|-----------------|-----------|------------------|------------------|------------------|----|
| 1  | 114.0913         | 57.5493          |           |                  |                |                  | L    |                  |                 |           |                  |                  |                  | 24 |
| 2  | 261.1598         | 131.0835         |           |                  |                |                  | F    | 2626.2559        | 1313.6316       | 2609.2294 | 1305.1183        | 2608.2453        | 1304.6263        | 23 |
| 3  | 318.1812         | 159.5942         |           |                  |                |                  | G    | 2479.1875        | 1240.0974       | 2462.1609 | 1231.5841        | 2461.1769        | 1231.0921        | 22 |
| 4  | <b>433.2082</b>  | 217.1077         |           |                  | 415.1976       | 208.1024         | D    | 2422.1660        | 1211.5867       | 2405.1395 | 1203.0734        | 2404.1555        | 1202.5814        | 21 |
| 5  | 561.3031         | 281.1552         | 544.2766  | 272.6419         | 543.2926       | 272.1499         | K    | 2307.1391        | 1154.0732       | 2290.1125 | 1145.5599        | 2289.1285        | 1145.0679        | 20 |
| 6  | 648.3352         | 324.6712         | 631.3086  | 316.1579         | 630.3246       | 315.6659         | S    | 2179.0441        | 1090.0257       | 2162.0176 | 1081.5124        | 2161.0336        | 1081.0204        | 19 |
| 7  | 761.4192         | 381.2132         | 744.3927  | 372.7000         | 743.4087       | 372.2080         | L    | 2092.0121        | 1046.5097       | 2074.9855 | 1037.9964        | 2074.0015        | 1037.5044        | 18 |
| 8  | 862.4669         | 431.7371         | 845.4403  | 423.2238         | 844.4563       | 422.7318         | T    | 1978.9280        | 989.9677        | 1961.9015 | 981.4544         | 1960.9175        | <b>980.9624</b>  | 17 |
| 9  | 1009.5353        | 505.2713         | 992.5088  | 496.7580         | 991.5247       | 496.2660         | F    | 1877.8804        | 939.4438        | 1860.8538 | 930.9305         | 1859.8698        | 930.4385         | 16 |
| 10 | 1124.5623        | 562.7848         | 1107.5357 | 554.2715         | 1106.5517      | 553.7795         | N    | <b>1730.8119</b> | <b>865.9096</b> | 1713.7854 | 857.3963         | <b>1712.8014</b> | 856.9043         | 15 |
| 11 | 1253.6048        | 627.3061         | 1236.5783 | 618.7928         | 1235.5943      | 618.3008         | E    | 1615.7850        | 808.3961        | 1598.7584 | 799.8829         | 1597.7744        | 799.3909         | 14 |
| 12 | 1354.6525        | 677.8299         | 1337.6260 | 669.3166         | 1336.6420      | 668.8246         | T    | <b>1486.7424</b> | 743.8748        | 1469.7159 | 735.3616         | 1468.7318        | 734.8696         | 13 |
| 13 | <b>1517.7159</b> | 759.3616         | 1500.6893 | <b>750.8483</b>  | 1499.7053      | <b>750.3563</b>  | Y    | <b>1385.6947</b> | 693.3510        | 1368.6682 | 684.8377         | 1367.6842        | 684.3457         | 12 |
| 14 | <b>1645.7744</b> | 823.3909         | 1628.7479 | <b>814.8776</b>  | 1627.7639      | <b>814.3856</b>  | Q    | <b>1222.6314</b> | 611.8193        | 1205.6048 | 603.3061         | 1204.6208        | 602.8141         | 11 |
| 15 | 1760.8014        | 880.9043         | 1743.7748 | 872.3911         | 1742.7908      | 871.8990         | D    | <b>1094.5728</b> | <b>547.7900</b> | 1077.5463 | 539.2768         | 1076.5623        | 538.7848         | 10 |
| 16 | 1873.8854        | 937.4464         | 1856.8589 | 928.9331         | 1855.8749      | 928.4411         | I    | <b>979.5459</b>  | 490.2766        | 962.5193  | 481.7633         | 961.5353         | 481.2713         | 9  |
| 17 | 1960.9175        | <b>980.9624</b>  | 1943.8909 | 972.4491         | 1942.9069      | 971.9571         | S    | <b>866.4618</b>  | <b>433.7345</b> | 849.4353  | 425.2213         | 848.4512         | 424.7293         | 8  |
| 18 | 2089.9601        | 1045.4837        | 2072.9335 | 1036.9704        | 2071.9495      | 1036.4784        | E    | <b>779.4298</b>  | 390.2185        | 762.4032  | 381.7053         | 761.4192         | 381.2132         | 7  |
| 19 | 2203.0441        | 1102.0257        | 2186.0176 | 1093.5124        | 2185.0336      | 1093.0204        | L    | <b>650.3872</b>  | 325.6972        | 633.3606  | 317.1840         |                  |                  | 6  |
| 20 | 2302.1125        | <b>1151.5599</b> | 2285.0860 | 1143.0466        | 2284.1020      | 1142.5546        | V    | <b>537.3031</b>  | 269.1552        | 520.2766  | 260.6419         |                  |                  | 5  |
| 21 | 2465.1759        | 1233.0916        | 2448.1493 | <b>1224.5783</b> | 2447.1653      | <b>1224.0863</b> | Y    | <b>438.2347</b>  | 219.6210        | 421.2082  | 211.1077         |                  |                  | 4  |
| 22 | 2522.1973        | 1261.6023        | 2505.1708 | 1253.0890        | 2504.1868      | 1252.5970        | G    | <b>275.1714</b>  | 138.0893        | 258.1448  | 129.5761         |                  |                  | 3  |
| 23 | 2593.2344        | <b>1297.1209</b> | 2576.2079 | <b>1288.6076</b> | 2575.2239      | <b>1288.1156</b> | A    | 218.1499         | 109.5786        | 201.1234  | 101.0653         |                  |                  | 2  |

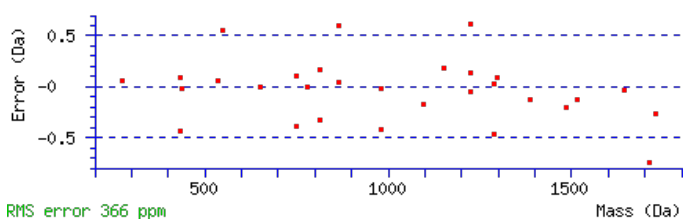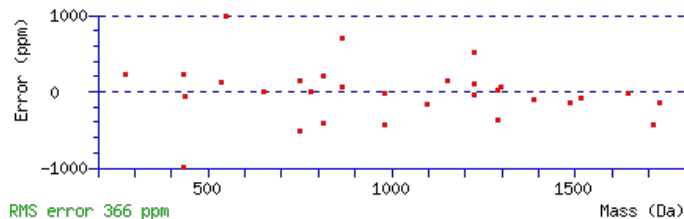

NCBI **BLAST** search of [LFGDKSLTFNETYQDISELVYGAK](#)

(Parameters: blastp, nr protein database, expect=20000, no filter, PAM30)

Other BLAST [web gateways](#)

**All matches to this query**

| Score | Mr(calc)  | Delta   | Sequence                                 | Site Analysis         |
|-------|-----------|---------|------------------------------------------|-----------------------|
| 52.2  | 2738.3327 | 0.0069  | <a href="#">LFGDKSLTFNETYQDISELVYGAK</a> | Deamidated N10 98.93% |
| 36.8  | 2737.3487 | 0.9909  | <a href="#">LFGDKSLTFNETYQDISELVYGAK</a> |                       |
| 32.5  | 2738.3327 | 0.0069  | <a href="#">LFGDKSLTFNETYQDISELVYGAK</a> | Deamidated Q14 1.07%  |
| 1.9   | 2738.3472 | -0.0077 | <a href="#">NSTKQEILAALEKGCSELPDPYQK</a> |                       |

Mascot: <http://www.matrixscience.com/>

# MATRIX SCIENCE Mascot Search Results

## Peptide View

MS/MS Fragmentation of **YLGNATAIFFLPDEGK**

Found in **P01009** in **con\_Xuniprot\_HUMAN3**, A1AT\_HUMAN Alpha-1-antitrypsin OS=Homo sapiens GN=SERPINA1 PE=1 SV=3

Match to Query 9665: 1755.878848 from(878.946700,2+) intensity(196314.5156) rtinseconds(2372) scans(6296) index(4622)

Title: 111019\_Est\_ISCardio\_NMI\_YP\_G\_7Spectrum5364\_scans\_\_6296

Data file C:\\mascot\\20140703\_Tmgf\_1D\\CSV\_UseAnalysis\\MasterCSV\\All\_Glyco\\mgf\\ptm\\UC18ERLIC\_PTM\_35D.mgf

Click mouse within plot area to zoom in by factor of two about that point

Or, to Da

Label all possible matches Label matches used for scoring

Show Y-axis

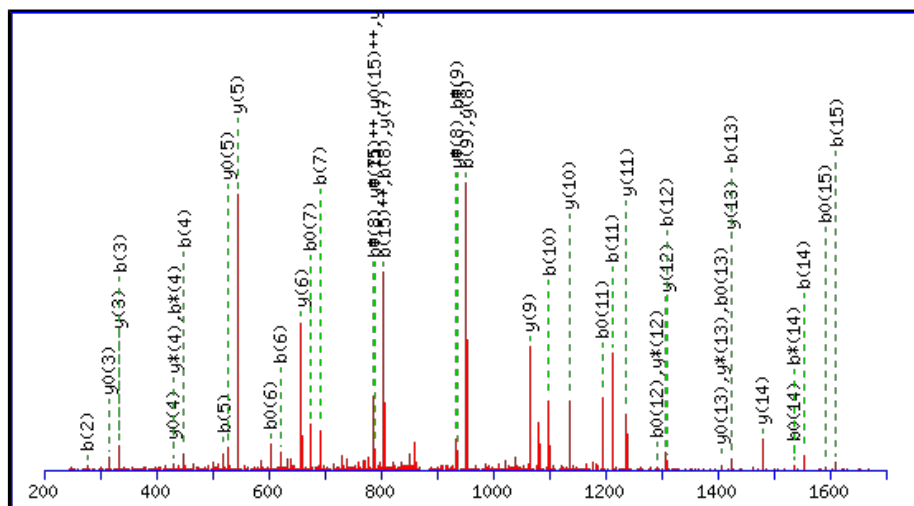

Monoisotopic mass of neutral peptide Mr(calc): 1755.8719

Fixed modifications: Carbamidomethyl (C) (apply to specified residues or termini only)

Variable modifications:

N4 : Deamidated (NQ)

Ions Score: 117 Expect: 4e-010

Matches : 52/160 fragment ions using 59 most intense peaks ([help](#))

| #  | b                | b <sup>++</sup> | b <sup>*</sup>   | b <sup>*++</sup> | b <sup>0</sup>   | b <sup>0++</sup> | Seq. | y                | y <sup>++</sup> | y <sup>*</sup>   | y <sup>*++</sup> | y <sup>0</sup>   | y <sup>0++</sup> | #  |
|----|------------------|-----------------|------------------|------------------|------------------|------------------|------|------------------|-----------------|------------------|------------------|------------------|------------------|----|
| 1  | 164.0706         | 82.5389         |                  |                  |                  |                  | Y    |                  |                 |                  |                  |                  |                  | 16 |
| 2  | <b>277.1547</b>  | 139.0810        |                  |                  |                  |                  | L    | 1593.8159        | 797.4116        | 1576.7894        | <b>788.8983</b>  | 1575.8053        | <b>788.4063</b>  | 15 |
| 3  | <b>334.1761</b>  | 167.5917        |                  |                  |                  |                  | G    | <b>1480.7318</b> | 740.8696        | 1463.7053        | 732.3563         | 1462.7213        | 731.8643         | 14 |
| 4  | <b>449.2031</b>  | 225.1052        | <b>432.1765</b>  | 216.5919         |                  |                  | N    | <b>1423.7104</b> | 712.3588        | <b>1406.6838</b> | 703.8456         | <b>1405.6998</b> | 703.3535         | 13 |
| 5  | <b>520.2402</b>  | 260.6237        | 503.2136         | 252.1105         |                  |                  | A    | <b>1308.6834</b> | 654.8454        | <b>1291.6569</b> | 646.3321         | 1290.6729        | 645.8401         | 12 |
| 6  | <b>621.2879</b>  | 311.1476        | 604.2613         | 302.6343         | <b>603.2773</b>  | 302.1423         | T    | <b>1237.6463</b> | 619.3268        | 1220.6198        | 610.8135         | 1219.6358        | 610.3215         | 11 |
| 7  | <b>692.3250</b>  | 346.6661        | 675.2984         | 338.1529         | <b>674.3144</b>  | 337.6608         | A    | <b>1136.5986</b> | 568.8030        | 1119.5721        | 560.2897         | 1118.5881        | 559.7977         | 10 |
| 8  | <b>805.4090</b>  | 403.2082        | <b>788.3825</b>  | 394.6949         | <b>787.3985</b>  | 394.2029         | I    | <b>1065.5615</b> | 533.2844        | 1048.5350        | 524.7711         | 1047.5510        | 524.2791         | 9  |
| 9  | <b>952.4775</b>  | 476.7424        | <b>935.4509</b>  | 468.2291         | <b>934.4669</b>  | 467.7371         | F    | <b>952.4775</b>  | 476.7424        | <b>935.4509</b>  | 468.2291         | <b>934.4669</b>  | 467.7371         | 8  |
| 10 | <b>1099.5459</b> | 550.2766        | 1082.5193        | 541.7633         | 1081.5353        | 541.2713         | F    | <b>805.4090</b>  | 403.2082        | <b>788.3825</b>  | 394.6949         | <b>787.3985</b>  | 394.2029         | 7  |
| 11 | <b>1212.6299</b> | 606.8186        | 1195.6034        | 598.3053         | <b>1194.6194</b> | 597.8133         | L    | <b>658.3406</b>  | 329.6740        | 641.3141         | 321.1607         | 640.3301         | 320.6687         | 6  |
| 12 | <b>1309.6827</b> | 655.3450        | 1292.6562        | 646.8317         | <b>1291.6721</b> | 646.3397         | P    | <b>545.2566</b>  | 273.1319        | 528.2300         | 264.6186         | <b>527.2460</b>  | 264.1266         | 5  |
| 13 | <b>1424.7096</b> | 712.8585        | 1407.6831        | 704.3452         | <b>1406.6991</b> | 703.8532         | D    | 448.2038         | 224.6055        | <b>431.1773</b>  | 216.0923         | <b>430.1932</b>  | 215.6003         | 4  |
| 14 | <b>1553.7522</b> | 777.3798        | <b>1536.7257</b> | 768.8665         | <b>1535.7417</b> | 768.3745         | E    | <b>333.1769</b>  | 167.0921        | 316.1503         | 158.5788         | <b>315.1663</b>  | 158.0868         | 3  |
| 15 | <b>1610.7737</b> | <b>805.8905</b> | 1593.7472        | 797.3772         | <b>1592.7631</b> | 796.8852         | G    | 204.1343         | 102.5708        | 187.1077         | 94.0575          |                  |                  | 2  |
| 16 |                  |                 |                  |                  |                  |                  | K    | 147.1128         | 74.0600         | 130.0863         | 65.5468          |                  |                  | 1  |

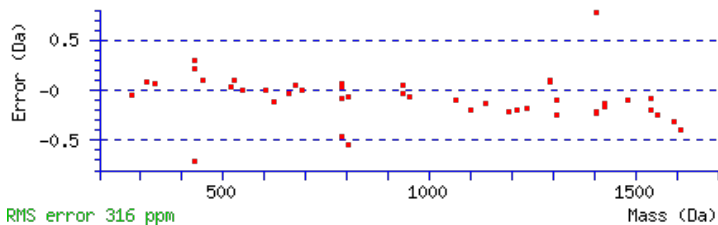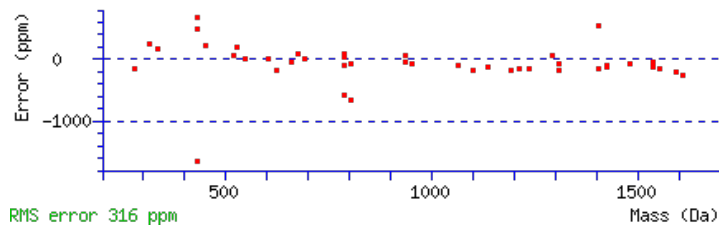

NCBI **BLAST** search of [YLGNATAIFFLPDEGK](#)

(Parameters: blastp, nr protein database, expect=20000, no filter, PAM30)

Other BLAST [web gateways](#)

**All matches to this query**

| Score | Mr(calc)  | Delta   | Sequence                          |
|-------|-----------|---------|-----------------------------------|
| 117.5 | 1755.8719 | 0.0069  | <a href="#">YLGNATAIFFLPDEGK</a>  |
| 8.4   | 1755.8791 | -0.0003 | <a href="#">FGKEGTSLARFNEATK</a>  |
| 6.5   | 1755.8787 | 0.0002  | <a href="#">IEVFNNSMMITLLSK</a>   |
| 5.3   | 1754.8695 | 1.0094  | <a href="#">FKMLQSELAVCREK</a>    |
| 4.9   | 1755.8753 | 0.0036  | <a href="#">MPQKGNLLIYTEFGK</a>   |
| 3.7   | 1753.8669 | 2.0120  | <a href="#">SNCTIEPDAVHIKAAK</a>  |
| 3.5   | 1753.8787 | 2.0001  | <a href="#">TENFKIAFYLSHOR</a>    |
| 2.2   | 1755.8766 | 0.0022  | <a href="#">YRMTSSARFYSLEK</a>    |
| 2.0   | 1754.8812 | 0.9976  | <a href="#">RIGGIRNEGHFQAQGDK</a> |
| 1.9   | 1754.8808 | 0.9981  | <a href="#">VQRVVGVTMGDMYRK</a>   |

Mascot: <http://www.matrixscience.com/>

# MATRIX SCIENCE Mascot Search Results

## Peptide View

MS/MS Fragmentation of **QLAHQSNSTNIFFSPVSIATAFAMLSLGTK**

Found in **G3V387** in **con\_Xuniprot\_HUMAN3**, G3V387\_HUMAN Short peptide from AAT (Fragment) OS=Homo sapiens GN=SERPINA1 PE=2 SV=1

Match to Query 27358: 3181.620282 from(1061.547370,3+) intensity(21636.8711) rtinseconds(2972) scans(7856) index(8648)

Title: 111019\_Est\_ISCardio\_NMI\_YS\_G\_3Spectrum6854\_scans\_7856

Data file C:\mascot\20140703\_Tmgf\_1D\CSV\_UseAnalysis\MasterCSV\All\_Glyco\mgf\ptm\UC18ERLIC\_PTM\_35D.mgf

Click mouse within plot area to zoom in by factor of two about that point

Or, to Da

Label all possible matches Label matches used for scoring

Show Y-axis

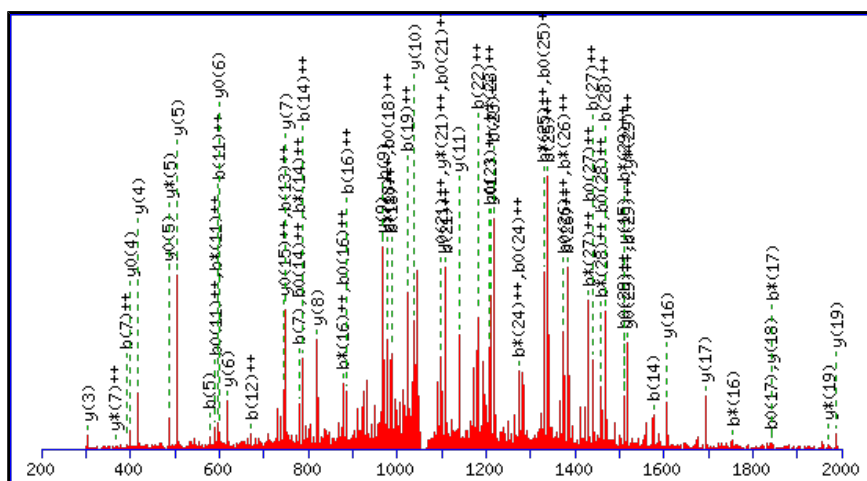

Monoisotopic mass of neutral peptide Mr(calc): 3181.6118

Fixed modifications: Carbamidomethyl (C) (apply to specified residues or termini only)

Variable modifications:

N7 : Deamidated (NQ)

Ions Score: 108 Expect: 3.7e-009

Matches : 73/336 fragment ions using 85 most intense peaks ([help](#))

| #  | b         | b <sup>++</sup> | b <sup>*</sup> | b <sup>*++</sup> | b <sup>0</sup> | b <sup>0++</sup> | Seq. | y         | y <sup>++</sup> | y <sup>*</sup> | y <sup>*++</sup> | y <sup>0</sup> | y <sup>0++</sup> | #  |
|----|-----------|-----------------|----------------|------------------|----------------|------------------|------|-----------|-----------------|----------------|------------------|----------------|------------------|----|
| 1  | 129.0659  | 65.0366         | 112.0393       | 56.5233          |                |                  | Q    |           |                 |                |                  |                |                  | 30 |
| 2  | 242.1499  | 121.5786        | 225.1234       | 113.0653         |                |                  | L    | 3054.5605 | 1527.7839       | 3037.5339      | 1519.2706        | 3036.5499      | 1518.7786        | 29 |
| 3  | 313.1870  | 157.0972        | 296.1605       | 148.5839         |                |                  | A    | 2941.4764 | 1471.2418       | 2924.4499      | 1462.7286        | 2923.4659      | 1462.2366        | 28 |
| 4  | 450.2459  | 225.6266        | 433.2194       | 217.1133         |                |                  | H    | 2870.4393 | 1435.7233       | 2853.4128      | 1427.2100        | 2852.4287      | 1426.7180        | 27 |
| 5  | 578.3045  | 289.6559        | 561.2780       | 281.1426         |                |                  | Q    | 2733.3804 | 1367.1938       | 2716.3538      | 1358.6806        | 2715.3698      | 1358.1886        | 26 |
| 6  | 665.3365  | 333.1719        | 648.3100       | 324.6586         | 647.3260       | 324.1666         | S    | 2605.3218 | 1303.1645       | 2588.2953      | 1294.6513        | 2587.3113      | 1294.1593        | 25 |
| 7  | 780.3635  | 390.6854        | 763.3369       | 382.1721         | 762.3529       | 381.6801         | N    | 2518.2898 | 1259.6485       | 2501.2632      | 1251.1353        | 2500.2792      | 1250.6433        | 24 |
| 8  | 867.3955  | 434.2014        | 850.3690       | 425.6881         | 849.3850       | 425.1961         | S    | 2403.2628 | 1202.1351       | 2386.2363      | 1193.6218        | 2385.2523      | 1193.1298        | 23 |
| 9  | 968.4432  | 484.7252        | 951.4167       | 476.2120         | 950.4326       | 475.7200         | T    | 2316.2308 | 1158.6190       | 2299.2043      | 1150.1058        | 2298.2203      | 1149.6138        | 22 |
| 10 | 1082.4861 | 541.7467        | 1065.4596      | 533.2334         | 1064.4756      | 532.7414         | N    | 2215.1831 | 1108.0952       | 2198.1566      | 1099.5819        | 2197.1726      | 1099.0899        | 21 |
| 11 | 1195.5702 | 598.2887        | 1178.5436      | 589.7755         | 1177.5596      | 589.2835         | I    | 2101.1402 | 1051.0737       | 2084.1137      | 1042.5605        | 2083.1296      | 1042.0685        | 20 |
| 12 | 1342.6386 | 671.8229        | 1325.6121      | 663.3097         | 1324.6280      | 662.8177         | F    | 1988.0561 | 994.5317        | 1971.0296      | 986.0184         | 1970.0456      | 985.5264         | 19 |
| 13 | 1489.7070 | 745.3571        | 1472.6805      | 736.8439         | 1471.6965      | 736.3519         | F    | 1840.9877 | 920.9975        | 1823.9612      | 912.4842         | 1822.9772      | 911.9922         | 18 |
| 14 | 1576.7390 | 788.8732        | 1559.7125      | 780.3599         | 1558.7285      | 779.8679         | S    | 1693.9193 | 847.4633        | 1676.8928      | 838.9500         | 1675.9088      | 838.4580         | 17 |
| 15 | 1673.7918 | 837.3995        | 1656.7653      | 828.8863         | 1655.7812      | 828.3943         | P    | 1606.8873 | 803.9473        | 1589.8607      | 795.4340         | 1588.8767      | 794.9420         | 16 |
| 16 | 1772.8602 | 886.9338        | 1755.8337      | 878.4205         | 1754.8497      | 877.9285         | V    | 1509.8345 | 755.4209        | 1492.8080      | 746.9076         | 1491.8240      | 746.4156         | 15 |
| 17 | 1859.8923 | 930.4498        | 1842.8657      | 921.9365         | 1841.8817      | 921.4445         | S    | 1410.7661 | 705.8867        | 1393.7396      | 697.3734         | 1392.7556      | 696.8814         | 14 |
| 18 | 1972.9763 | 986.9918        | 1955.9498      | 978.4785         | 1954.9658      | 977.9865         | I    | 1323.7341 | 662.3707        | 1306.7075      | 653.8574         | 1305.7235      | 653.3654         | 13 |
| 19 | 2044.0134 | 1022.5104       | 2026.9869      | 1013.9971        | 2026.0029      | 1013.5051        | A    | 1210.6500 | 605.8286        | 1193.6235      | 597.3154         | 1192.6395      | 596.8234         | 12 |
| 20 | 2145.0611 | 1073.0342       | 2128.0346      | 1064.5209        | 2127.0505      | 1064.0289        | T    | 1139.6129 | 570.3101        | 1122.5864      | 561.7968         | 1121.6023      | 561.3048         | 11 |
| 21 | 2216.0982 | 1108.5527       | 2199.0717      | 1100.0395        | 2198.0877      | 1099.5475        | A    | 1038.5652 | 519.7863        | 1021.5387      | 511.2730         | 1020.5547      | 510.7810         | 10 |
| 22 | 2363.1666 | 1182.0870       | 2346.1401      | 1173.5737        | 2345.1561      | 1173.0817        | F    | 967.5281  | 484.2677        | 950.5016       | 475.7544         | 949.5176       | 475.2624         | 9  |

|    |           |                  |           |                  |           |                  |   |                 |          |                 |                 |                 |          |   |
|----|-----------|------------------|-----------|------------------|-----------|------------------|---|-----------------|----------|-----------------|-----------------|-----------------|----------|---|
| 23 | 2434.2038 | <b>1217.6055</b> | 2417.1772 | <b>1209.0922</b> | 2416.1932 | <b>1208.6002</b> | A | <b>820.4597</b> | 410.7335 | 803.4332        | 402.2202        | 802.4491        | 401.7282 | 8 |
| 24 | 2565.2442 | 1283.1258        | 2548.2177 | <b>1274.6125</b> | 2547.2337 | <b>1274.1205</b> | M | <b>749.4226</b> | 375.2149 | 732.3960        | <b>366.7017</b> | 731.4120        | 366.2096 | 7 |
| 25 | 2678.3283 | <b>1339.6678</b> | 2661.3018 | <b>1331.1545</b> | 2660.3177 | <b>1330.6625</b> | L | <b>618.3821</b> | 309.6947 | 601.3556        | 301.1814        | <b>600.3715</b> | 300.6894 | 6 |
| 26 | 2765.3603 | <b>1383.1838</b> | 2748.3338 | <b>1374.6705</b> | 2747.3498 | <b>1374.1785</b> | S | <b>505.2980</b> | 253.1527 | <b>488.2715</b> | 244.6394        | <b>487.2875</b> | 244.1474 | 5 |
| 27 | 2878.4444 | <b>1439.7258</b> | 2861.4178 | <b>1431.2126</b> | 2860.4338 | <b>1430.7206</b> | L | <b>418.2660</b> | 209.6366 | 401.2395        | 201.1234        | <b>400.2554</b> | 200.6314 | 4 |
| 28 | 2935.4659 | <b>1468.2366</b> | 2918.4393 | <b>1459.7233</b> | 2917.4553 | <b>1459.2313</b> | G | <b>305.1819</b> | 153.0946 | 288.1554        | 144.5813        | 287.1714        | 144.0893 | 3 |
| 29 | 3036.5135 | <b>1518.7604</b> | 3019.4870 | <b>1510.2471</b> | 3018.5030 | <b>1509.7551</b> | T | 248.1605        | 124.5839 | 231.1339        | 116.0706        | 230.1499        | 115.5786 | 2 |
| 30 |           |                  |           |                  |           |                  | K | 147.1128        | 74.0600  | 130.0863        | 65.5468         |                 |          | 1 |

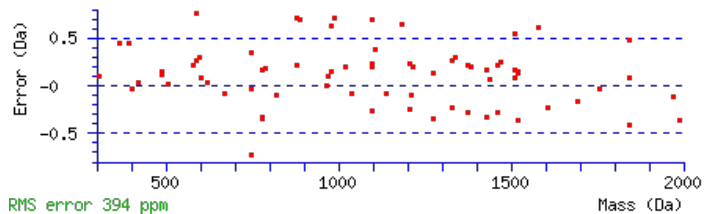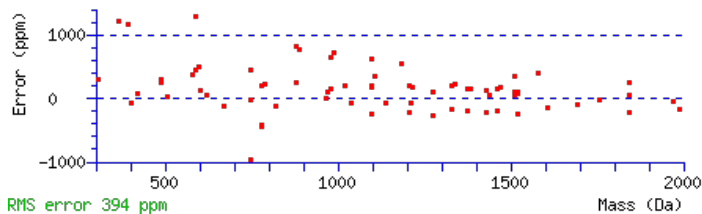

NCBI BLAST search of [QLAHQSNSTNIEFSPVSIATAFAMLSLGTK](#)  
 (Parameters: blastp, nr protein database, expect=20000, no filter, PAM30)  
 Other BLAST [web gateways](#)

All matches to this query

| Score | Mr(calc)  | Delta   | Sequence                                       | Site Analysis        |
|-------|-----------|---------|------------------------------------------------|----------------------|
| 107.6 | 3181.6118 | 0.0085  | <a href="#">QLAHQSNSTNIEFSPVSIATAFAMLSLGTK</a> | Deamidated N7 36.07% |
| 107.6 | 3181.6118 | 0.0085  | <a href="#">QLAHQSNSTNIEFSPVSIATAFAMLSLGTK</a> | Deamidated Q5 36.07% |
| 105.9 | 3181.6118 | 0.0085  | <a href="#">QLAHQSNSTNIEFSPVSIATAFAMLSLGTK</a> | Deamidated Q1 24.55% |
| 97.2  | 3181.6118 | 0.0085  | <a href="#">QLAHQSNSTNIEFSPVSIATAFAMLSLGTK</a> | Deamidated N10 3.31% |
| 70.3  | 3180.6278 | 0.9925  | <a href="#">QLAHQSNSTNIEFSPVSIATAFAMLSLGTK</a> |                      |
| 18.3  | 3181.6215 | -0.0012 | <a href="#">TINKGQNTLNATQDKEDNTELVHLSLSAK</a>  |                      |
| 5.7   | 3180.6199 | 1.0004  | <a href="#">MEYLIQGPDYVLVASDRVAASNIVQMK</a>    |                      |
| 5.6   | 3180.6060 | 1.0143  | <a href="#">QVPELMHHQLTLNGCAEEKQVEHIIVK</a>    |                      |
| 5.6   | 3180.6060 | 1.0143  | <a href="#">QVPELMHHQLTLNGCAEEKQVEHIIVK</a>    |                      |
| 2.6   | 3180.6060 | 1.0143  | <a href="#">QVPELMHHQLTLNGCAEEKQVEHIIVK</a>    |                      |

Mascot: <http://www.matrixscience.com/>

# MASCOT SCIENCE Mascot Search Results

## Peptide View

MS/MS Fragmentation of **ADTHDEILEGLNFNLTPEIPEAQIHEGFQELLR**

Found in **G3V2B9** in **con\_Xumiprot\_HUMAN3**, G3V2B9\_HUMAN Short peptide from AAT (Fragment) OS=Homo sapiens GN=SERPINA1 PE=2 SV=1

Match to Query 27982: 3692.798772 from(1231.940200,3+) intensity(5404.9976) rtinseconds(2718) scans(6633) index(27951)

Title: 111019\_Est\_MI\_YS\_G\_11Spectrum5817\_scans\_6633

Data file C:\mascot\20140703\_Tmgf\_1D\CSV\_UseAnalysis\MasterCSV\All\_Glyco\mgf\ptm\UC18ERLIC\_PTM\_35D.mgf

Click mouse within plot area to zoom in by factor of two about that point

Or,  to  Da

Label all possible matches  Label matches used for scoring

Show Y-axis

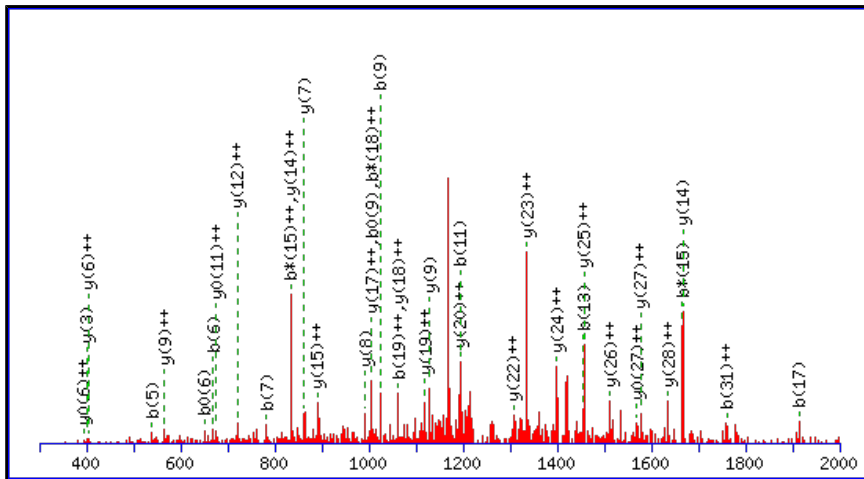

Monoisotopic mass of neutral peptide Mr(calc): 3692.7845

Fixed modifications: Carbamidomethyl (C) (apply to specified residues or termini only)

Variable modifications:

N14 : Deamidated (NQ)

Q22 : Deamidated (NQ)

Ions Score: 103 Expect: 1.3e-008

Matches : 38/342 fragment ions using 51 most intense peaks ([help](#))

| #  | b                | b <sup>++</sup>  | b <sup>*</sup>   | b <sup>*++</sup> | b <sup>0</sup>   | b <sup>0++</sup> | Seq. | y                | y <sup>++</sup>  | y <sup>*</sup> | y <sup>*++</sup> | y <sup>0</sup> | y <sup>0++</sup> | #  |
|----|------------------|------------------|------------------|------------------|------------------|------------------|------|------------------|------------------|----------------|------------------|----------------|------------------|----|
| 1  | 72.0444          | 36.5258          |                  |                  |                  |                  | A    |                  |                  |                |                  |                |                  | 32 |
| 2  | 187.0713         | 94.0393          |                  |                  | 169.0608         | 85.0340          | D    | 3622.7548        | 1811.8810        | 3605.7282      | 1803.3677        | 3604.7442      | 1802.8757        | 31 |
| 3  | 288.1190         | 144.5631         |                  |                  | 270.1084         | 135.5579         | T    | 3507.7278        | 1754.3675        | 3490.7013      | 1745.8543        | 3489.7173      | 1745.3623        | 30 |
| 4  | 425.1779         | 213.0926         |                  |                  | 407.1674         | 204.0873         | H    | 3406.6801        | 1703.8437        | 3389.6536      | 1695.3304        | 3388.6696      | 1694.8384        | 29 |
| 5  | <b>540.2049</b>  | 270.6061         |                  |                  | 522.1943         | 261.6008         | D    | 3269.6212        | <b>1635.3143</b> | 3252.5947      | 1626.8010        | 3251.6107      | 1626.3090        | 28 |
| 6  | <b>669.2475</b>  | 335.1274         |                  |                  | <b>651.2369</b>  | 326.1221         | E    | 3154.5943        | <b>1577.8008</b> | 3137.5677      | 1569.2875        | 3136.5837      | <b>1568.7955</b> | 27 |
| 7  | <b>782.3315</b>  | 391.6694         |                  |                  | 764.3210         | 382.6641         | I    | 3025.5517        | <b>1513.2795</b> | 3008.5251      | 1504.7662        | 3007.5411      | 1504.2742        | 26 |
| 8  | 895.4156         | 448.2114         |                  |                  | 877.4050         | 439.2061         | L    | 2912.4676        | <b>1456.7375</b> | 2895.4411      | 1448.2242        | 2894.4571      | 1447.7322        | 25 |
| 9  | <b>1024.4582</b> | 512.7327         |                  |                  | <b>1006.4476</b> | 503.7274         | E    | 2799.3836        | <b>1400.1954</b> | 2782.3570      | 1391.6821        | 2781.3730      | 1391.1901        | 24 |
| 10 | 1081.4796        | 541.2435         |                  |                  | 1063.4691        | 532.2382         | G    | 2670.3410        | <b>1335.6741</b> | 2653.3144      | 1327.1609        | 2652.3304      | 1326.6688        | 23 |
| 11 | <b>1194.5637</b> | 597.7855         |                  |                  | 1176.5531        | 588.7802         | L    | 2613.3195        | <b>1307.1634</b> | 2596.2930      | 1298.6501        | 2595.3089      | 1298.1581        | 22 |
| 12 | 1308.6066        | 654.8070         | 1291.5801        | 646.2937         | 1290.5961        | 645.8017         | N    | 2500.2354        | 1250.6214        | 2483.2089      | 1242.1081        | 2482.2249      | 1241.6161        | 21 |
| 13 | <b>1455.6751</b> | 728.3412         | 1438.6485        | 719.8279         | 1437.6645        | 719.3359         | F    | 2386.1925        | <b>1193.5999</b> | 2369.1660      | 1185.0866        | 2368.1820      | 1184.5946        | 20 |
| 14 | 1570.7020        | 785.8546         | 1553.6754        | 777.3414         | 1552.6914        | 776.8494         | N    | 2239.1241        | <b>1120.0657</b> | 2222.0976      | 1111.5524        | 2221.1135      | 1111.0604        | 19 |
| 15 | 1683.7861        | 842.3967         | <b>1666.7595</b> | <b>833.8834</b>  | 1665.7755        | 833.3914         | L    | 2124.0972        | <b>1062.5522</b> | 2107.0706      | 1054.0389        | 2106.0866      | 1053.5469        | 18 |
| 16 | 1784.8337        | 892.9205         | 1767.8072        | 884.4072         | 1766.8232        | 883.9152         | T    | 2011.0131        | <b>1006.0102</b> | 1993.9866      | 997.4969         | 1993.0025      | 997.0049         | 17 |
| 17 | <b>1913.8763</b> | 957.4418         | 1896.8498        | 948.9285         | 1895.8658        | 948.4365         | E    | 1909.9654        | 955.4863         | 1892.9389      | 946.9731         | 1891.9549      | 946.4811         | 16 |
| 18 | 2026.9604        | 1013.9838        | 2009.9338        | <b>1005.4706</b> | 2008.9498        | 1004.9786        | I    | 1780.9228        | <b>890.9651</b>  | 1763.8963      | 882.4518         | 1762.9123      | 881.9598         | 15 |
| 19 | 2124.0132        | <b>1062.5102</b> | 2106.9866        | 1053.9969        | 2106.0026        | 1053.5049        | P    | <b>1667.8388</b> | <b>834.4230</b>  | 1650.8122      | 825.9097         | 1649.8282      | 825.4177         | 14 |
| 20 | 2253.0557        | 1127.0315        | 2236.0292        | 1118.5182        | 2235.0452        | 1118.0262        | E    | 1570.7860        | 785.8966         | 1553.7595      | 777.3834         | 1552.7754      | 776.8914         | 13 |
| 21 | 2324.0929        | 1162.5501        | 2307.0663        | 1154.0368        | 2306.0823        | 1153.5448        | A    | 1441.7434        | <b>721.3753</b>  | 1424.7169      | 712.8621         | 1423.7328      | 712.3701         | 12 |



|    |           |           |           |           |           |           |   |           |          |           |          |           |          |    |
|----|-----------|-----------|-----------|-----------|-----------|-----------|---|-----------|----------|-----------|----------|-----------|----------|----|
| 22 | 2453.1355 | 1227.0714 | 2436.1089 | 1218.5581 | 2435.1249 | 1218.0661 | Q | 1370.7063 | 685.8568 | 1353.6797 | 677.3435 | 1352.6957 | 676.8515 | 11 |
| 23 | 2566.2195 | 1283.6134 | 2549.1930 | 1275.1001 | 2548.2090 | 1274.6081 | I | 1241.6637 | 621.3355 | 1224.6371 | 612.8222 | 1223.6531 | 612.3302 | 10 |
| 24 | 2703.2784 | 1352.1429 | 2686.2519 | 1343.6296 | 2685.2679 | 1343.1376 | H | 1128.5796 | 564.7935 | 1111.5531 | 556.2802 | 1110.5691 | 555.7882 | 9  |
| 25 | 2832.3210 | 1416.6642 | 2815.2945 | 1408.1509 | 2814.3105 | 1407.6589 | E | 991.5207  | 496.2640 | 974.4942  | 487.7507 | 973.5102  | 487.2587 | 8  |
| 26 | 2889.3425 | 1445.1749 | 2872.3159 | 1436.6616 | 2871.3319 | 1436.1696 | G | 862.4781  | 431.7427 | 845.4516  | 423.2294 | 844.4676  | 422.7374 | 7  |
| 27 | 3036.4109 | 1518.7091 | 3019.3844 | 1510.1958 | 3018.4003 | 1509.7038 | F | 805.4567  | 403.2320 | 788.4301  | 394.7187 | 787.4461  | 394.2267 | 6  |
| 28 | 3164.4695 | 1582.7384 | 3147.4429 | 1574.2251 | 3146.4589 | 1573.7331 | Q | 658.3883  | 329.6978 | 641.3617  | 321.1845 | 640.3777  | 320.6925 | 5  |
| 29 | 3293.5121 | 1647.2597 | 3276.4855 | 1638.7464 | 3275.5015 | 1638.2544 | E | 530.3297  | 265.6685 | 513.3031  | 257.1552 | 512.3191  | 256.6632 | 4  |
| 30 | 3406.5961 | 1703.8017 | 3389.5696 | 1695.2884 | 3388.5856 | 1694.7964 | L | 401.2871  | 201.1472 | 384.2605  | 192.6339 |           |          | 3  |
| 31 | 3519.6802 | 1760.3437 | 3502.6537 | 1751.8305 | 3501.6696 | 1751.3385 | L | 288.2030  | 144.6051 | 271.1765  | 136.0919 |           |          | 2  |
| 32 |           |           |           |           |           |           | R | 175.1190  | 88.0631  | 158.0924  | 79.5498  |           |          | 1  |

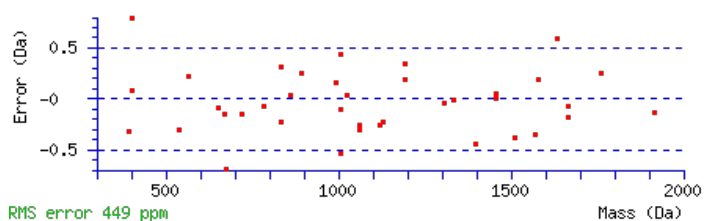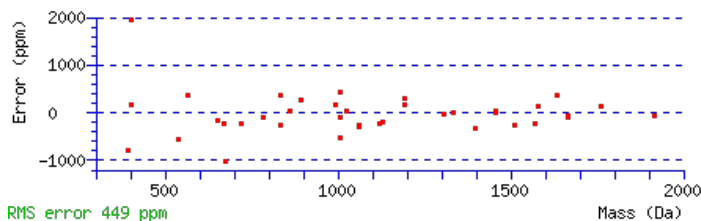

NCBI BLAST search of [ADTHDEILEGLNFNLTEIPEAQIHEGFQELLR](#)  
 (Parameters: blastp, nr protein database, expect=20000, no filter, PAM30)  
 Other BLAST [web gateways](#)

All matches to this query

| Score | Mr(calc)  | Delta  | Sequence                                         | Site Analysis              |
|-------|-----------|--------|--------------------------------------------------|----------------------------|
| 103.1 | 3692.7845 | 0.0142 | <a href="#">ADTHDEILEGLNFNLTEIPEAQIHEGFQELLR</a> | Deamidated N14, Q22 67.32% |
| 96.3  | 3692.7845 | 0.0142 | <a href="#">ADTHDEILEGLNFNLTEIPEAQIHEGFQELLR</a> | Deamidated N14, Q28 13.94% |
| 95.3  | 3692.7845 | 0.0142 | <a href="#">ADTHDEILEGLNFNLTEIPEAQIHEGFQELLR</a> | Deamidated N12, N14 10.99% |
| 91.0  | 3692.7845 | 0.0142 | <a href="#">ADTHDEILEGLNFNLTEIPEAQIHEGFQELLR</a> | Deamidated N12, Q22 4.09%  |
| 89.1  | 3692.7845 | 0.0142 | <a href="#">ADTHDEILEGLNFNLTEIPEAQIHEGFQELLR</a> | Deamidated Q22, Q28 2.66%  |
| 84.8  | 3692.7845 | 0.0142 | <a href="#">ADTHDEILEGLNFNLTEIPEAQIHEGFQELLR</a> | Deamidated N12, Q28 1.00%  |
| 81.1  | 3691.8005 | 0.9982 | <a href="#">ADTHDEILEGLNFNLTEIPEAQIHEGFQELLR</a> |                            |
| 81.1  | 3691.8005 | 0.9982 | <a href="#">ADTHDEILEGLNFNLTEIPEAQIHEGFQELLR</a> |                            |
| 77.3  | 3691.8005 | 0.9982 | <a href="#">ADTHDEILEGLNFNLTEIPEAQIHEGFQELLR</a> |                            |
| 71.5  | 3691.8005 | 0.9982 | <a href="#">ADTHDEILEGLNFNLTEIPEAQIHEGFQELLR</a> |                            |

Mascot: <http://www.matrixscience.com/>

# MASCOT SCIENCE Mascot Search Results

## Peptide View

MS/MS Fragmentation of **ADTHDEILEGLNFNLTPEAQIHEGFQELLR**

Found in **G3V2B9** in **con\_Xuniprot\_HUMAN3**, G3V2B9\_HUMAN Short peptide from AAT (Fragment) OS=Homo sapiens GN=SERPINA1 PE=2 SV=1

Match to Query 27983: 3692.807892 from(1231.943240,3+) intensity(0.0000) rtinseconds(3026) scans(7863) index(1065)

Title: 111019\_Est\_ISCardio\_NMI\_YP\_G\_2Spectrum6910\_scans\_7863

Data file C:\mascot\20140703\_Tmgf\_1D\CSV\_UseAnalysis\MasterCSV\All\_Glyco\mgf\ptm\UC18ERLIC\_PTM\_35D.mgf

Click mouse within plot area to zoom in by factor of two about that point

Or, to Da

Label all possible matches Label matches used for scoring

Show Y-axis

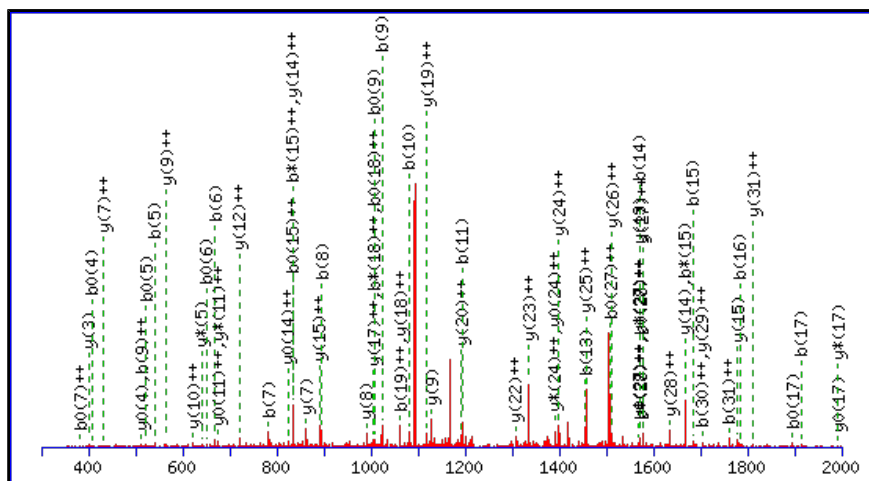

Monoisotopic mass of neutral peptide Mr(calc): 3691.8005

Fixed modifications: Carbamidomethyl (C) (apply to specified residues or termini only)

Variable modifications:

N14 : Deamidated (NQ)

Ions Score: 100 Expect: 2.3e-008

Matches : 67/342 fragment ions using 102 most intense peaks ([help](#))

| #  | b         | b <sup>++</sup> | b <sup>*</sup> | b <sup>*++</sup> | b <sup>0</sup> | b <sup>0++</sup> | Seq. | y         | y <sup>++</sup> | y <sup>*</sup> | y <sup>*++</sup> | y <sup>0</sup> | y <sup>0++</sup> | #  |
|----|-----------|-----------------|----------------|------------------|----------------|------------------|------|-----------|-----------------|----------------|------------------|----------------|------------------|----|
| 1  | 72.0444   | 36.5258         |                |                  |                |                  | A    |           |                 |                |                  |                |                  | 32 |
| 2  | 187.0713  | 94.0393         |                |                  | 169.0608       | 85.0340          | D    | 3621.7707 | 1811.3890       | 3604.7442      | 1802.8757        | 3603.7602      | 1802.3837        | 31 |
| 3  | 288.1190  | 144.5631        |                |                  | 270.1084       | 135.5579         | T    | 3506.7438 | 1753.8755       | 3489.7173      | 1745.3623        | 3488.7332      | 1744.8703        | 30 |
| 4  | 425.1779  | 213.0926        |                |                  | 407.1674       | 204.0873         | H    | 3405.6961 | 1703.3517       | 3388.6696      | 1694.8384        | 3387.6856      | 1694.3464        | 29 |
| 5  | 540.2049  | 270.6061        |                |                  | 522.1943       | 261.6008         | D    | 3268.6372 | 1634.8222       | 3251.6107      | 1626.3090        | 3250.6267      | 1625.8170        | 28 |
| 6  | 669.2475  | 335.1274        |                |                  | 651.2369       | 326.1221         | E    | 3153.6103 | 1577.3088       | 3136.5837      | 1568.7955        | 3135.5997      | 1568.3035        | 27 |
| 7  | 782.3315  | 391.6694        |                |                  | 764.3210       | 382.6641         | I    | 3024.5677 | 1512.7875       | 3007.5411      | 1504.2742        | 3006.5571      | 1503.7822        | 26 |
| 8  | 895.4156  | 448.2114        |                |                  | 877.4050       | 439.2061         | L    | 2911.4836 | 1456.2454       | 2894.4571      | 1447.7322        | 2893.4731      | 1447.2402        | 25 |
| 9  | 1024.4582 | 512.7327        |                |                  | 1006.4476      | 503.7274         | E    | 2798.3996 | 1399.7034       | 2781.3730      | 1391.1901        | 2780.3890      | 1390.6981        | 24 |
| 10 | 1081.4796 | 541.2435        |                |                  | 1063.4691      | 532.2382         | G    | 2669.3570 | 1335.1821       | 2652.3304      | 1326.6688        | 2651.3464      | 1326.1768        | 23 |
| 11 | 1194.5637 | 597.7855        |                |                  | 1176.5531      | 588.7802         | L    | 2612.3355 | 1306.6714       | 2595.3089      | 1298.1581        | 2594.3249      | 1297.6661        | 22 |
| 12 | 1308.6066 | 654.8070        | 1291.5801      | 646.2937         | 1290.5961      | 645.8017         | N    | 2499.2514 | 1250.1294       | 2482.2249      | 1241.6161        | 2481.2409      | 1241.1241        | 21 |
| 13 | 1455.6751 | 728.3412        | 1438.6485      | 719.8279         | 1437.6645      | 719.3359         | F    | 2385.2085 | 1193.1079       | 2368.1820      | 1184.5946        | 2367.1979      | 1184.1026        | 20 |
| 14 | 1570.7020 | 785.8546        | 1553.6754      | 777.3414         | 1552.6914      | 776.8494         | N    | 2238.1401 | 1119.5737       | 2221.1135      | 1111.0604        | 2220.1295      | 1110.5684        | 19 |
| 15 | 1683.7861 | 842.3967        | 1666.7595      | 833.8834         | 1665.7755      | 833.3914         | L    | 2123.1131 | 1062.0602       | 2106.0866      | 1053.5469        | 2105.1026      | 1053.0549        | 18 |
| 16 | 1784.8337 | 892.9205        | 1767.8072      | 884.4072         | 1766.8232      | 883.9152         | T    | 2010.0291 | 1005.5182       | 1993.0025      | 997.0049         | 1992.0185      | 996.5129         | 17 |
| 17 | 1913.8763 | 957.4418        | 1896.8498      | 948.9285         | 1895.8658      | 948.4365         | E    | 1908.9814 | 954.9943        | 1891.9549      | 946.4811         | 1890.9708      | 945.9891         | 16 |
| 18 | 2026.9604 | 1013.9838       | 2009.9338      | 1005.4706        | 2008.9498      | 1004.9786        | I    | 1779.9388 | 890.4730        | 1762.9123      | 881.9598         | 1761.9282      | 881.4678         | 15 |
| 19 | 2124.0132 | 1062.5102       | 2106.9866      | 1053.9969        | 2106.0026      | 1053.5049        | P    | 1666.8547 | 833.9310        | 1649.8282      | 825.4177         | 1648.8442      | 824.9257         | 14 |
| 20 | 2253.0557 | 1127.0315       | 2236.0292      | 1118.5182        | 2235.0452      | 1118.0262        | E    | 1569.8020 | 785.4046        | 1552.7754      | 776.8914         | 1551.7914      | 776.3993         | 13 |
| 21 | 2324.0929 | 1162.5501       | 2307.0663      | 1154.0368        | 2306.0823      | 1153.5448        | A    | 1440.7594 | 720.8833        | 1423.7328      | 712.3701         | 1422.7488      | 711.8781         | 12 |
| 22 | 2452.1514 | 1226.5794       | 2435.1249      | 1218.0661        | 2434.1409      | 1217.5741        | Q    | 1369.7223 | 685.3648        | 1352.6957      | 676.8515         | 1351.7117      | 676.3595         | 11 |

|    |           |           |           |           |           |           |   |           |          |           |          |           |          |    |
|----|-----------|-----------|-----------|-----------|-----------|-----------|---|-----------|----------|-----------|----------|-----------|----------|----|
| 23 | 2565.2355 | 1283.1214 | 2548.2090 | 1274.6081 | 2547.2249 | 1274.1161 | I | 1241.6637 | 621.3355 | 1224.6371 | 612.8222 | 1223.6531 | 612.3302 | 10 |
| 24 | 2702.2944 | 1351.6508 | 2685.2679 | 1343.1376 | 2684.2839 | 1342.6456 | H | 1128.5796 | 564.7935 | 1111.5531 | 556.2802 | 1110.5691 | 555.7882 | 9  |
| 25 | 2831.3370 | 1416.1721 | 2814.3105 | 1407.6589 | 2813.3264 | 1407.1669 | E | 991.5207  | 496.2640 | 974.4942  | 487.7507 | 973.5102  | 487.2587 | 8  |
| 26 | 2888.3585 | 1444.6829 | 2871.3319 | 1436.1696 | 2870.3479 | 1435.6776 | G | 862.4781  | 431.7427 | 845.4516  | 423.2294 | 844.4676  | 422.7374 | 7  |
| 27 | 3035.4269 | 1518.2171 | 3018.4003 | 1509.7038 | 3017.4163 | 1509.2118 | F | 805.4567  | 403.2320 | 788.4301  | 394.7187 | 787.4461  | 394.2267 | 6  |
| 28 | 3163.4855 | 1582.2464 | 3146.4589 | 1573.7331 | 3145.4749 | 1573.2411 | Q | 658.3883  | 329.6978 | 641.3617  | 321.1845 | 640.3777  | 320.6925 | 5  |
| 29 | 3292.5281 | 1646.7677 | 3275.5015 | 1638.2544 | 3274.5175 | 1637.7624 | E | 530.3297  | 265.6685 | 513.3031  | 257.1552 | 512.3191  | 256.6632 | 4  |
| 30 | 3405.6121 | 1703.3097 | 3388.5856 | 1694.7964 | 3387.6016 | 1694.3044 | L | 401.2871  | 201.1472 | 384.2605  | 192.6339 |           |          | 3  |
| 31 | 3518.6962 | 1759.8517 | 3501.6696 | 1751.3385 | 3500.6856 | 1750.8464 | L | 288.2030  | 144.6051 | 271.1765  | 136.0919 |           |          | 2  |
| 32 |           |           |           |           |           |           | R | 175.1190  | 88.0631  | 158.0924  | 79.5498  |           |          | 1  |

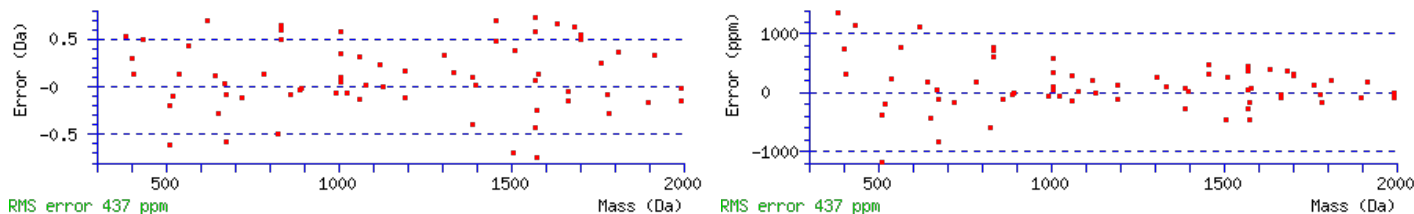

NCBI BLAST search of [ADTHDEILEGLNFNLTEIPEAQIHEGFQELLR](#)  
 (Parameters: blastp, nr protein database, expect=20000, no filter, PAM30)  
 Other BLAST [web gateways](#)

All matches to this query

| Score | Mr(calc)  | Delta   | Sequence                                             | Site Analysis         |
|-------|-----------|---------|------------------------------------------------------|-----------------------|
| 100.4 | 3691.8005 | 1.0074  | <a href="#">ADTHDEILEGLNFNLTEIPEAQIHEGFQELLR</a>     | Deamidated N14 35.27% |
| 100.4 | 3691.8005 | 1.0074  | <a href="#">ADTHDEILEGLNFNLTEIPEAQIHEGFQELLR</a>     | Deamidated N12 35.27% |
| 97.8  | 3691.8005 | 1.0074  | <a href="#">ADTHDEILEGLNFNLTEIPEAQIHEGFQELLR</a>     | Deamidated Q22 19.52% |
| 94.9  | 3691.8005 | 1.0074  | <a href="#">ADTHDEILEGLNFNLTEIPEAQIHEGFQELLR</a>     | Deamidated Q28 9.94%  |
| 58.6  | 3690.8165 | 1.9914  | <a href="#">ADTHDEILEGLNFNLTEIPEAQIHEGFQELLR</a>     |                       |
| 12.5  | 3690.7923 | 2.0156  | <a href="#">IRMQAQGSLEFQGS MIGSFIDIYQQEGTRGLWR</a>   |                       |
| 12.5  | 3690.7923 | 2.0156  | <a href="#">IRMQAQGSLEFQGS MIGSFIDIYQQEGTRGLWR</a>   |                       |
| 12.2  | 3692.8169 | -0.0090 | <a href="#">AGSELPEQQVTTKNGPPASPPPPALLOSKSHGQSPR</a> |                       |
| 9.3   | 3690.8100 | 1.9979  | <a href="#">RHEALTYVEQLATRODESLPAMLLQYWAADR</a>      |                       |
| 9.2   | 3690.7923 | 2.0156  | <a href="#">IRMQAQGSLEFQGS MIGSFIDIYQQEGTRGLWR</a>   |                       |

Mascot: <http://www.matrixscience.com/>

# MATRIX SCIENCE Mascot Search Results

## Peptide View

MS/MS Fragmentation of **YLGNATAIFFLPDEGKLQHLENELTHDIITK**

Found in **P01009** in **con\_Xuniprot\_HUMAN3**, A1AT\_HUMAN Alpha-1-antitrypsin OS=Homo sapiens GN=SERPINA1 PE=1 SV=3

Match to Query 27800: 3540.828012 from(1181.283280,3+) intensity(10833.5225) rtinseconds(2635) scans(6713) index(8118)

Title: 111019\_Est\_ISCardio\_NMI\_YS\_G\_2Spectrum5821\_scans\_\_6713

Data file C:\mascot\20140703\_Tmgf\_1D\CSV\_UseAnalysis\MasterCSV\All\_Glyco\mgf\ptm\UC18ERLIC\_PTM\_35D.mgf

Click mouse within plot area to zoom in by factor of two about that point

Or, to Da

Label all possible matches Label matches used for scoring

Show Y-axis

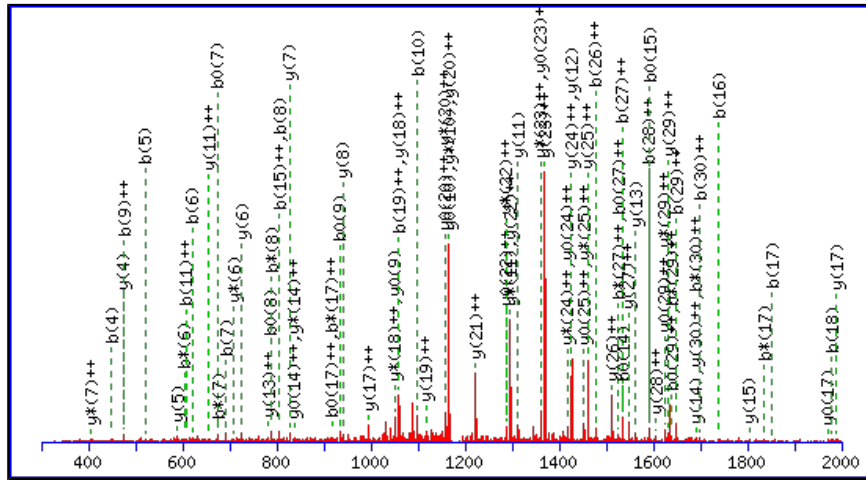

Monoisotopic mass of neutral peptide Mr(calc): 3540.8140

Fixed modifications: Carbamidomethyl (C) (apply to specified residues or termini only)

Variable modifications:

N4 : Deamidated (NQ)

Ions Score: 72 Expect: 1.1e-005

Matches : 83/342 fragment ions using 153 most intense peaks ([help](#))

| #  | b         | b <sup>++</sup> | b <sup>*</sup> | b <sup>*++</sup> | b <sup>0</sup> | b <sup>0++</sup> | Seq. | y         | y <sup>++</sup> | y <sup>*</sup> | y <sup>*++</sup> | y <sup>0</sup> | y <sup>0++</sup> | #  |
|----|-----------|-----------------|----------------|------------------|----------------|------------------|------|-----------|-----------------|----------------|------------------|----------------|------------------|----|
| 1  | 164.0706  | 82.5389         |                |                  |                |                  | Y    |           |                 |                |                  |                |                  | 31 |
| 2  | 277.1547  | 139.0810        |                |                  |                |                  | L    | 3378.7580 | 1689.8826       | 3361.7315      | 1681.3694        | 3360.7474      | 1680.8774        | 30 |
| 3  | 334.1761  | 167.5917        |                |                  |                |                  | G    | 3265.6739 | 1633.3406       | 3248.6474      | 1624.8273        | 3247.6634      | 1624.3353        | 29 |
| 4  | 449.2031  | 225.1052        | 432.1765       | 216.5919         |                |                  | N    | 3208.6525 | 1604.8299       | 3191.6259      | 1596.3166        | 3190.6419      | 1595.8246        | 28 |
| 5  | 520.2402  | 260.6237        | 503.2136       | 252.1105         |                |                  | A    | 3093.6255 | 1547.3164       | 3076.5990      | 1538.8031        | 3075.6150      | 1538.3111        | 27 |
| 6  | 621.2879  | 311.1476        | 604.2613       | 302.6343         | 603.2773       | 302.1423         | T    | 3022.5884 | 1511.7978       | 3005.5619      | 1503.2846        | 3004.5779      | 1502.7926        | 26 |
| 7  | 692.3250  | 346.6661        | 675.2984       | 338.1529         | 674.3144       | 337.6608         | A    | 2921.5407 | 1461.2740       | 2904.5142      | 1452.7607        | 2903.5302      | 1452.2687        | 25 |
| 8  | 805.4090  | 403.2082        | 788.3825       | 394.6949         | 787.3985       | 394.2029         | I    | 2850.5036 | 1425.7554       | 2833.4771      | 1417.2422        | 2832.4931      | 1416.7502        | 24 |
| 9  | 952.4775  | 476.7424        | 935.4509       | 468.2291         | 934.4669       | 467.7371         | F    | 2737.4196 | 1369.2134       | 2720.3930      | 1360.7001        | 2719.4090      | 1360.2081        | 23 |
| 10 | 1099.5459 | 550.2766        | 1082.5193      | 541.7633         | 1081.5353      | 541.2713         | F    | 2590.3511 | 1295.6792       | 2573.3246      | 1287.1659        | 2572.3406      | 1286.6739        | 22 |
| 11 | 1212.6299 | 606.8186        | 1195.6034      | 598.3053         | 1194.6194      | 597.8133         | L    | 2443.2827 | 1222.1450       | 2426.2562      | 1213.6317        | 2425.2722      | 1213.1397        | 21 |
| 12 | 1309.6827 | 655.3450        | 1292.6562      | 646.8317         | 1291.6721      | 646.3397         | P    | 2330.1987 | 1165.6030       | 2313.1721      | 1157.0897        | 2312.1881      | 1156.5977        | 20 |
| 13 | 1424.7096 | 712.8585        | 1407.6831      | 704.3452         | 1406.6991      | 703.8532         | D    | 2233.1459 | 1117.0766       | 2216.1194      | 1108.5633        | 2215.1353      | 1108.0713        | 19 |
| 14 | 1553.7522 | 777.3798        | 1536.7257      | 768.8665         | 1535.7417      | 768.3745         | E    | 2118.1190 | 1059.5631       | 2101.0924      | 1051.0498        | 2100.1084      | 1050.5578        | 18 |
| 15 | 1610.7737 | 805.8905        | 1593.7472      | 797.3772         | 1592.7631      | 796.8852         | G    | 1989.0764 | 995.0418        | 1972.0498      | 986.5285         | 1971.0658      | 986.0365         | 17 |
| 16 | 1738.8687 | 869.9380        | 1721.8421      | 861.4247         | 1720.8581      | 860.9327         | K    | 1932.0549 | 966.5311        | 1915.0284      | 958.0178         | 1914.0443      | 957.5258         | 16 |
| 17 | 1851.9527 | 926.4800        | 1834.9262      | 917.9667         | 1833.9422      | 917.4747         | L    | 1803.9599 | 902.4836        | 1786.9334      | 893.9703         | 1785.9494      | 893.4783         | 15 |
| 18 | 1980.0113 | 990.5093        | 1962.9848      | 981.9960         | 1962.0007      | 981.5040         | Q    | 1690.8759 | 845.9416        | 1673.8493      | 837.4283         | 1672.8653      | 836.9363         | 14 |
| 19 | 2117.0702 | 1059.0387       | 2100.0437      | 1050.5255        | 2099.0597      | 1050.0335        | H    | 1562.8173 | 781.9123        | 1545.7907      | 773.3990         | 1544.8067      | 772.9070         | 13 |
| 20 | 2230.1543 | 1115.5808       | 2213.1277      | 1107.0675        | 2212.1437      | 1106.5755        | L    | 1425.7584 | 713.3828        | 1408.7318      | 704.8696         | 1407.7478      | 704.3775         | 12 |
| 21 | 2359.1969 | 1180.1021       | 2342.1703      | 1171.5888        | 2341.1863      | 1171.0968        | E    | 1312.6743 | 656.8408        | 1295.6478      | 648.3275         | 1294.6638      | 647.8355         | 11 |
| 22 | 2473.2398 | 1237.1235       | 2456.2133      | 1228.6103        | 2455.2292      | 1228.1183        | N    | 1183.6317 | 592.3195        | 1166.6052      | 583.8062         | 1165.6212      | 583.3142         | 10 |
| 23 | 2602.2824 | 1301.6448       | 2585.2558      | 1293.1316        | 2584.2718      | 1292.6396        | E    | 1069.5888 | 535.2980        | 1052.5623      | 526.7848         | 1051.5782      | 526.2928         | 9  |

|    |           |           |           |           |           |           |   |          |          |          |          |          |          |   |
|----|-----------|-----------|-----------|-----------|-----------|-----------|---|----------|----------|----------|----------|----------|----------|---|
| 24 | 2715.3665 | 1358.1869 | 2698.3399 | 1349.6736 | 2697.3559 | 1349.1816 | L | 940.5462 | 470.7767 | 923.5197 | 462.2635 | 922.5356 | 461.7715 | 8 |
| 25 | 2816.4141 | 1408.7107 | 2799.3876 | 1400.1974 | 2798.4036 | 1399.7054 | T | 827.4621 | 414.2347 | 810.4356 | 405.7214 | 809.4516 | 405.2294 | 7 |
| 26 | 2953.4731 | 1477.2402 | 2936.4465 | 1468.7269 | 2935.4625 | 1468.2349 | H | 726.4145 | 363.7109 | 709.3879 | 355.1976 | 708.4039 | 354.7056 | 6 |
| 27 | 3068.5000 | 1534.7536 | 3051.4734 | 1526.2404 | 3050.4894 | 1525.7484 | D | 589.3556 | 295.1814 | 572.3290 | 286.6681 | 571.3450 | 286.1761 | 5 |
| 28 | 3181.5841 | 1591.2957 | 3164.5575 | 1582.7824 | 3163.5735 | 1582.2904 | I | 474.3286 | 237.6679 | 457.3021 | 229.1547 | 456.3180 | 228.6627 | 4 |
| 29 | 3294.6681 | 1647.8377 | 3277.6416 | 1639.3244 | 3276.6576 | 1638.8324 | I | 361.2445 | 181.1259 | 344.2180 | 172.6126 | 343.2340 | 172.1206 | 3 |
| 30 | 3395.7158 | 1698.3615 | 3378.6893 | 1689.8483 | 3377.7052 | 1689.3563 | T | 248.1605 | 124.5839 | 231.1339 | 116.0706 | 230.1499 | 115.5786 | 2 |
| 31 |           |           |           |           |           |           | K | 147.1128 | 74.0600  | 130.0863 | 65.5468  |          |          | 1 |

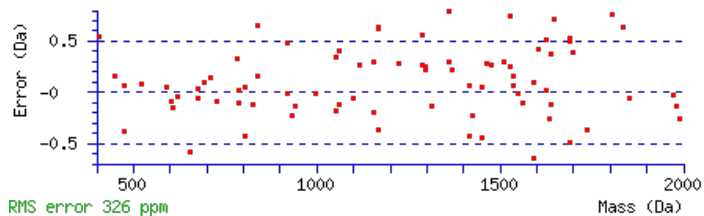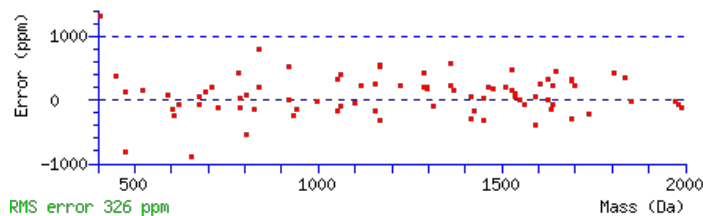

NCBI BLAST search of [YLGNATAIFFLPDEGKLOHLENELTHDIITK](#)  
 (Parameters: blastp, nr protein database, expect=20000, no filter, PAM30)  
 Other BLAST [web gateways](#)

All matches to this query

| Score | Mr(calc)  | Delta   | Sequence                                           | Site Analysis         |
|-------|-----------|---------|----------------------------------------------------|-----------------------|
| 71.6  | 3540.8140 | 0.0140  | <a href="#">YLGNATAIFFLPDEGKLOHLENELTHDIITK</a>    | Deamidated N4 84.00%  |
| 62.8  | 3540.8140 | 0.0140  | <a href="#">YLGNATAIFFLPDEGKLOHLENELTHDIITK</a>    | Deamidated Q18 11.23% |
| 59.1  | 3540.8140 | 0.0140  | <a href="#">YLGNATAIFFLPDEGKLOHLENELTHDIITK</a>    | Deamidated N22 4.77%  |
| 47.5  | 3539.8300 | 0.9980  | <a href="#">YLGNATAIFFLPDEGKLOHLENELTHDIITK</a>    |                       |
| 10.6  | 3538.8076 | 2.0205  | <a href="#">NNSLNELMCLKPPANIAQPVATAATDVSNQTVKK</a> |                       |
| 10.6  | 3538.8076 | 2.0205  | <a href="#">NNSLNELMCLKPPANIAQPVATAATDVSNQTVKK</a> |                       |
| 10.6  | 3538.8076 | 2.0205  | <a href="#">NNSLNELMCLKPPANIAQPVATAATDVSNQTVKK</a> |                       |
| 4.6   | 3540.8398 | -0.0118 | <a href="#">ALWDRGLLNGASQKAEVIMNYHVGETVLSLQK</a>   |                       |
| 3.9   | 3540.8398 | -0.0118 | <a href="#">ALWDRGLLNGASQKAEVIMNYHVGETVLSLQK</a>   |                       |
| 3.7   | 3538.8125 | 2.0155  | <a href="#">MPSLFISGLSDQLIPPVMMKQLYELSPSRTK</a>    |                       |

Mascot: <http://www.matrixscience.com/>

# MATRIX SCIENCE Mascot Search Results

## Peptide View

MS/MS Fragmentation of **GNEANYNSNATTDHGLVQFSINTTNVMGTSLTVR**

Found in **P01023** in **con\_Xuniprot\_HUMAN3**, A2MG\_HUMAN Alpha-2-macroglobulin OS=Homo sapiens GN=A2M PE=1 SV=3

Match to Query 28089: 3807.746112 from(1270.255980,3+) intensity(0.0000) rtinseconds(3024) scans(8045) index(1695)

Title: 111019\_Est\_ISCardio\_NMI\_YP\_G\_3Spectrum7064\_scans\_\_8045

Data file C:\mascot\20140703\_Tmgf\_1D\CSV\_UseAnalysis\MasterCSV\All\_Glyco\mgf\ptm\UC18ERLIC\_PTM\_35D.mgf

Click mouse within plot area to zoom in by factor of two about that point

Or, to Da

Label all possible matches Label matches used for scoring

Show Y-axis

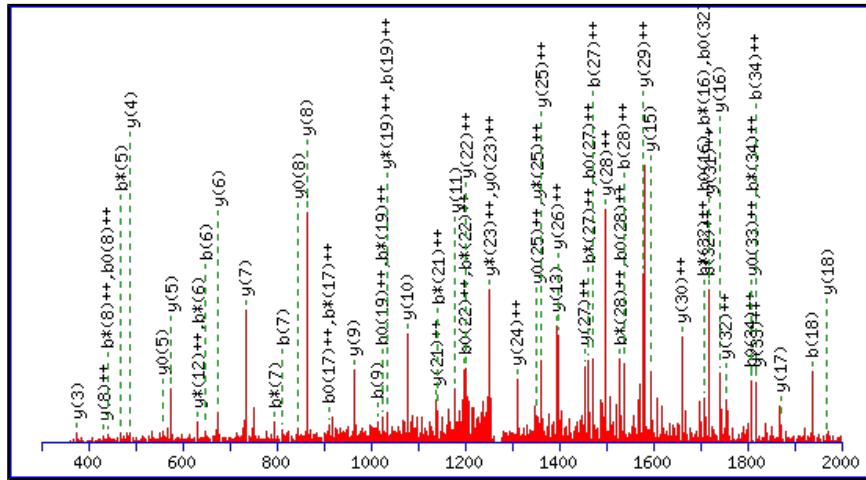

Monoisotopic mass of neutral peptide Mr(calc): 3805.7377

Fixed modifications: Carbamidomethyl (C) (apply to specified residues or termini only)

Variable modifications:

N9 : Deamidated (NQ)

N23 : Deamidated (NQ)

Ions Score: 114 Expect: 8e-010

Matches : 67/398 fragment ions using 85 most intense peaks ([help](#))

| #  | b         | b <sup>++</sup> | b <sup>*</sup> | b <sup>*++</sup> | b <sup>0</sup> | b <sup>0++</sup> | Seq. | y         | y <sup>++</sup> | y <sup>*</sup> | y <sup>*++</sup> | y <sup>0</sup> | y <sup>0++</sup> | #  |
|----|-----------|-----------------|----------------|------------------|----------------|------------------|------|-----------|-----------------|----------------|------------------|----------------|------------------|----|
| 1  | 58.0287   | 29.5180         |                |                  |                |                  | G    |           |                 |                |                  |                |                  | 35 |
| 2  | 172.0717  | 86.5395         | 155.0451       | 78.0262          |                |                  | N    | 3749.7235 | 1875.3654       | 3732.6970      | 1866.8521        | 3731.7130      | 1866.3601        | 34 |
| 3  | 301.1143  | 151.0608        | 284.0877       | 142.5475         | 283.1037       | 142.0555         | E    | 3635.6806 | 1818.3439       | 3618.6541      | 1809.8307        | 3617.6701      | 1809.3387        | 33 |
| 4  | 372.1514  | 186.5793        | 355.1248       | 178.0661         | 354.1408       | 177.5740         | A    | 3506.6380 | 1753.8226       | 3489.6115      | 1745.3094        | 3488.6275      | 1744.8174        | 32 |
| 5  | 486.1943  | 243.6008        | 469.1678       | 235.0875         | 468.1837       | 234.5955         | N    | 3435.6009 | 1718.3041       | 3418.5744      | 1709.7908        | 3417.5903      | 1709.2988        | 31 |
| 6  | 649.2576  | 325.1325        | 632.2311       | 316.6192         | 631.2471       | 316.1272         | Y    | 3321.5580 | 1661.2826       | 3304.5314      | 1652.7694        | 3303.5474      | 1652.2773        | 30 |
| 7  | 812.3210  | 406.6641        | 795.2944       | 398.1508         | 794.3104       | 397.6588         | Y    | 3158.4947 | 1579.7510       | 3141.4681      | 1571.2377        | 3140.4841      | 1570.7457        | 29 |
| 8  | 899.3530  | 450.1801        | 882.3264       | 441.6669         | 881.3424       | 441.1748         | S    | 2995.4313 | 1498.2193       | 2978.4048      | 1489.7060        | 2977.4208      | 1489.2140        | 28 |
| 9  | 1014.3799 | 507.6936        | 997.3534       | 499.1803         | 996.3694       | 498.6883         | N    | 2908.3993 | 1454.7033       | 2891.3727      | 1446.1900        | 2890.3887      | 1445.6980        | 27 |
| 10 | 1085.4170 | 543.2122        | 1068.3905      | 534.6989         | 1067.4065      | 534.2069         | A    | 2793.3724 | 1397.1898       | 2776.3458      | 1388.6765        | 2775.3618      | 1388.1845        | 26 |
| 11 | 1186.4647 | 593.7360        | 1169.4382      | 585.2227         | 1168.4542      | 584.7307         | T    | 2722.3352 | 1361.6713       | 2705.3087      | 1353.1580        | 2704.3247      | 1352.6660        | 25 |
| 12 | 1287.5124 | 644.2598        | 1270.4859      | 635.7466         | 1269.5018      | 635.2546         | T    | 2621.2876 | 1311.1474       | 2604.2610      | 1302.6341        | 2603.2770      | 1302.1421        | 24 |
| 13 | 1402.5393 | 701.7733        | 1385.5128      | 693.2600         | 1384.5288      | 692.7680         | D    | 2520.2399 | 1260.6236       | 2503.2133      | 1252.1103        | 2502.2293      | 1251.6183        | 23 |
| 14 | 1531.5819 | 766.2946        | 1514.5554      | 757.7813         | 1513.5714      | 757.2893         | E    | 2405.2129 | 1203.1101       | 2388.1864      | 1194.5968        | 2387.2024      | 1194.1048        | 22 |
| 15 | 1668.6409 | 834.8241        | 1651.6143      | 826.3108         | 1650.6303      | 825.8188         | H    | 2276.1703 | 1138.5888       | 2259.1438      | 1130.0755        | 2258.1598      | 1129.5835        | 21 |
| 16 | 1725.6623 | 863.3348        | 1708.6358      | 854.8215         | 1707.6517      | 854.3295         | G    | 2139.1114 | 1070.0594       | 2122.0849      | 1061.5461        | 2121.1009      | 1061.0541        | 20 |
| 17 | 1838.7464 | 919.8768        | 1821.7198      | 911.3636         | 1820.7358      | 910.8715         | L    | 2082.0900 | 1041.5486       | 2065.0634      | 1033.0353        | 2064.0794      | 1032.5433        | 19 |
| 18 | 1937.8148 | 969.4110        | 1920.7882      | 960.8978         | 1919.8042      | 960.4058         | V    | 1969.0059 | 985.0066        | 1951.9794      | 976.4933         | 1950.9953      | 976.0013         | 18 |
| 19 | 2065.8734 | 1033.4403       | 2048.8468      | 1024.9270        | 2047.8628      | 1024.4350        | Q    | 1869.9375 | 935.4724        | 1852.9109      | 926.9591         | 1851.9269      | 926.4671         | 17 |
| 20 | 2212.9418 | 1106.9745       | 2195.9152      | 1098.4613        | 2194.9312      | 1097.9692        | F    | 1741.8789 | 871.4431        | 1724.8524      | 862.9298         | 1723.8683      | 862.4378         | 16 |
| 21 | 2299.9738 | 1150.4905       | 2282.9473      | 1141.9773        | 2281.9632      | 1141.4853        | S    | 1594.8105 | 797.9089        | 1577.7839      | 789.3956         | 1576.7999      | 788.9036         | 15 |
| 22 | 2413.0579 | 1207.0326       | 2396.0313      | 1198.5193        | 2395.0473      | 1198.0273        | I    | 1507.7785 | 754.3929        | 1490.7519      | 745.8796         | 1489.7679      | 745.3876         | 14 |



|    |           |                  |           |                  |           |                  |   |                  |                 |           |                 |                 |          |    |
|----|-----------|------------------|-----------|------------------|-----------|------------------|---|------------------|-----------------|-----------|-----------------|-----------------|----------|----|
| 23 | 2528.0848 | 1264.5460        | 2511.0583 | 1256.0328        | 2510.0743 | 1255.5408        | N | <b>1394.6944</b> | 697.8508        | 1377.6679 | 689.3376        | 1376.6838       | 688.8456 | 13 |
| 24 | 2629.1325 | 1315.0699        | 2612.1059 | 1306.5566        | 2611.1219 | 1306.0646        | T | 1279.6675        | 640.3374        | 1262.6409 | <b>631.8241</b> | 1261.6569       | 631.3321 | 12 |
| 25 | 2730.1802 | 1365.5937        | 2713.1536 | 1357.0805        | 2712.1696 | 1356.5884        | T | <b>1178.6198</b> | 589.8135        | 1161.5932 | 581.3003        | 1160.6092       | 580.8082 | 11 |
| 26 | 2844.2231 | 1422.6152        | 2827.1966 | 1414.1019        | 2826.2125 | 1413.6099        | N | <b>1077.5721</b> | 539.2897        | 1060.5456 | 530.7764        | 1059.5615       | 530.2844 | 10 |
| 27 | 2943.2915 | <b>1472.1494</b> | 2926.2650 | <b>1463.6361</b> | 2925.2810 | <b>1463.1441</b> | V | <b>963.5292</b>  | 482.2682        | 946.5026  | 473.7550        | 945.5186        | 473.2629 | 9  |
| 28 | 3074.3320 | <b>1537.6696</b> | 3057.3055 | <b>1529.1564</b> | 3056.3214 | <b>1528.6644</b> | M | <b>864.4608</b>  | <b>432.7340</b> | 847.4342  | 424.2207        | <b>846.4502</b> | 423.7287 | 8  |
| 29 | 3131.3535 | 1566.1804        | 3114.3269 | 1557.6671        | 3113.3429 | 1557.1751        | G | <b>733.4203</b>  | 367.2138        | 716.3937  | 358.7005        | 715.4097        | 358.2085 | 7  |
| 30 | 3232.4011 | 1616.7042        | 3215.3746 | 1608.1909        | 3214.3906 | 1607.6989        | T | <b>676.3988</b>  | 338.7030        | 659.3723  | 330.1898        | 658.3883        | 329.6978 | 6  |
| 31 | 3319.4332 | 1660.2202        | 3302.4066 | 1651.7070        | 3301.4226 | 1651.2149        | S | <b>575.3511</b>  | 288.1792        | 558.3246  | 279.6659        | <b>557.3406</b> | 279.1739 | 5  |
| 32 | 3432.5172 | <b>1716.7623</b> | 3415.4907 | <b>1708.2490</b> | 3414.5067 | <b>1707.7570</b> | L | <b>488.3191</b>  | 244.6632        | 471.2926  | 236.1499        | 470.3085        | 235.6579 | 4  |
| 33 | 3533.5649 | 1767.2861        | 3516.5384 | 1758.7728        | 3515.5544 | 1758.2808        | T | <b>375.2350</b>  | 188.1212        | 358.2085  | 179.6079        | 357.2245        | 179.1159 | 3  |
| 34 | 3632.6333 | <b>1816.8203</b> | 3615.6068 | <b>1808.3070</b> | 3614.6228 | <b>1807.8150</b> | V | 274.1874         | 137.5973        | 257.1608  | 129.0840        |                 |          | 2  |
| 35 |           |                  |           |                  |           |                  | R | 175.1190         | 88.0631         | 158.0924  | 79.5498         |                 |          | 1  |

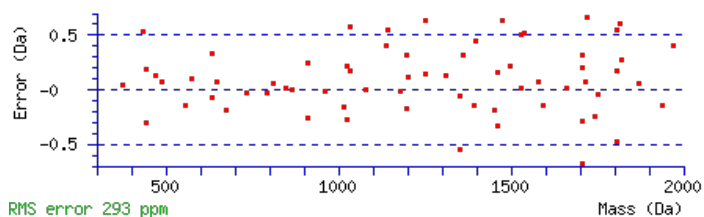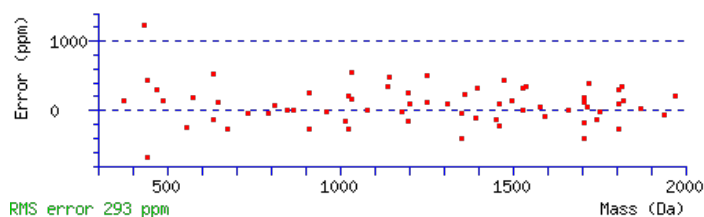

NCBI BLAST search of [GNEANYYSNATTDEHGLVQFSINTTNVMGTS�TVR](#)

(Parameters: blastp, nr protein database, expect=20000, no filter, PAM30)

Other BLAST [web gateways](#)

All matches to this query

| Score | Mr(calc)  | Delta  | Sequence                                            | Site Analysis             |
|-------|-----------|--------|-----------------------------------------------------|---------------------------|
| 113.6 | 3805.7377 | 2.0084 | <a href="#">GNEANYYSNATTDEHGLVQFSINTTNVMGTS�TVR</a> | Deamidated N9, N23 86.80% |
| 104.5 | 3805.7377 | 2.0084 | <a href="#">GNEANYYSNATTDEHGLVQFSINTTNVMGTS�TVR</a> | Deamidated N9, N26 10.65% |
| 95.9  | 3805.7377 | 2.0084 | <a href="#">GNEANYYSNATTDEHGLVQFSINTTNVMGTS�TVR</a> | Deamidated N9, Q19 1.46%  |
| 90.5  | 3805.7377 | 2.0084 | <a href="#">GNEANYYSNATTDEHGLVQFSINTTNVMGTS�TVR</a> | Deamidated N5, N23 0.43%  |
| 90.3  | 3805.7377 | 2.0084 | <a href="#">GNEANYYSNATTDEHGLVQFSINTTNVMGTS�TVR</a> | Deamidated Q19, N23 0.41% |
| 82.4  | 3805.7377 | 2.0084 | <a href="#">GNEANYYSNATTDEHGLVQFSINTTNVMGTS�TVR</a> | Deamidated N2, N23 0.07%  |
| 82.4  | 3805.7377 | 2.0084 | <a href="#">GNEANYYSNATTDEHGLVQFSINTTNVMGTS�TVR</a> | Deamidated N5, N26 0.06%  |
| 82.2  | 3805.7377 | 2.0084 | <a href="#">GNEANYYSNATTDEHGLVQFSINTTNVMGTS�TVR</a> | Deamidated Q19, N26 0.06% |
| 74.7  | 3805.7377 | 2.0084 | <a href="#">GNEANYYSNATTDEHGLVQFSINTTNVMGTS�TVR</a> | Deamidated N5, Q19 0.01%  |
| 74.6  | 3805.7377 | 2.0084 | <a href="#">GNEANYYSNATTDEHGLVQFSINTTNVMGTS�TVR</a> | Deamidated N2, N26 0.01%  |

Mascot: <http://www.matrixscience.com/>



# MASCOT SCIENCE Mascot Search Results

## Peptide View

MS/MS Fragmentation of **GNEANYNSNATTDHGLVQFSINTTNVMGTSLTVR**

Found in **P01023** in **con\_Xuniprot\_HUMAN3**, A2MG\_HUMAN Alpha-2-macroglobulin OS=Homo sapiens GN=A2M PE=1 SV=3

Match to Query 28077: 3806.741382 from(1269.921070,3+) intensity(13695.8389) rtinseconds(2913) scans(7732) index(1668)

Title: 111019\_Est\_ISCardio\_NMI\_YP\_G\_3Spectrum6783\_scans\_\_7732

Data file C:\\mascot\\20140703\_Tmgf\_1D\\CSV\_UseAnalysis\\MasterCSV\\All\_Glyco\\mgf\\ptm\\UC18ERLIC\_PTM\_35D.mgf

Click mouse within plot area to zoom in by factor of two about that point

Or,  to  Da

Label all possible matches  Label matches used for scoring

Show Y-axis

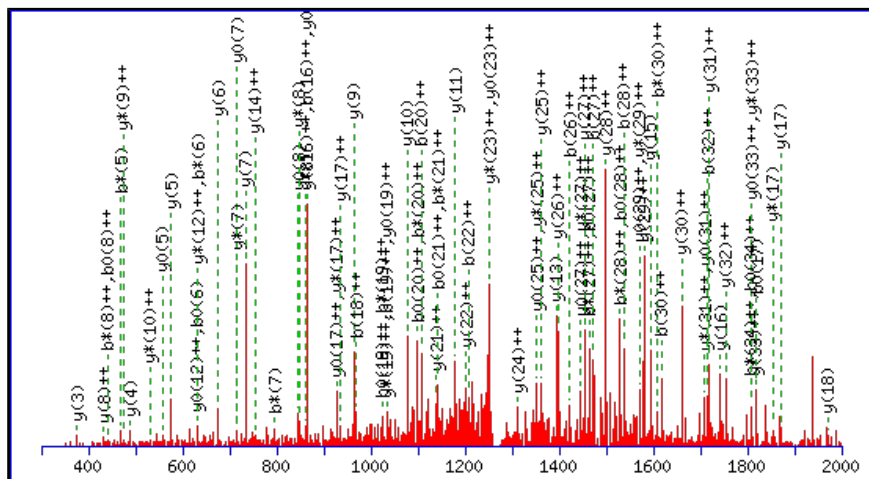

Monoisotopic mass of neutral peptide Mr(calc): 3805.7377

Fixed modifications: Carbamidomethyl (C) (apply to specified residues or termini only)

Variable modifications:

Q19 : Deamidated (NQ)

N23 : Deamidated (NQ)

Ions Score: 85 Expect: 4.8e-007

Matches : 87/398 fragment ions using 136 most intense peaks ([help](#))

| #  | b         | b <sup>++</sup> | b <sup>*</sup> | b <sup>*++</sup> | b <sup>0</sup> | b <sup>0++</sup> | Seq. | y         | y <sup>++</sup> | y <sup>*</sup> | y <sup>*++</sup> | y <sup>0</sup> | y <sup>0++</sup> | #  |
|----|-----------|-----------------|----------------|------------------|----------------|------------------|------|-----------|-----------------|----------------|------------------|----------------|------------------|----|
| 1  | 58.0287   | 29.5180         |                |                  |                |                  | G    |           |                 |                |                  |                |                  | 35 |
| 2  | 172.0717  | 86.5395         | 155.0451       | 78.0262          |                |                  | N    | 3749.7235 | 1875.3654       | 3732.6970      | 1866.8521        | 3731.7130      | 1866.3601        | 34 |
| 3  | 301.1143  | 151.0608        | 284.0877       | 142.5475         | 283.1037       | 142.0555         | E    | 3635.6806 | 1818.3439       | 3618.6541      | 1809.8307        | 3617.6701      | 1809.3387        | 33 |
| 4  | 372.1514  | 186.5793        | 355.1248       | 178.0661         | 354.1408       | 177.5740         | A    | 3506.6380 | 1753.8226       | 3489.6115      | 1745.3094        | 3488.6275      | 1744.8174        | 32 |
| 5  | 486.1943  | 243.6008        | 469.1678       | 235.0875         | 468.1837       | 234.5955         | N    | 3435.6009 | 1718.3041       | 3418.5744      | 1709.7908        | 3417.5903      | 1709.2988        | 31 |
| 6  | 649.2576  | 325.1325        | 632.2311       | 316.6192         | 631.2471       | 316.1272         | Y    | 3321.5580 | 1661.2826       | 3304.5314      | 1652.7694        | 3303.5474      | 1652.2773        | 30 |
| 7  | 812.3210  | 406.6641        | 795.2944       | 398.1508         | 794.3104       | 397.6588         | Y    | 3158.4947 | 1579.7510       | 3141.4681      | 1571.2377        | 3140.4841      | 1570.7457        | 29 |
| 8  | 899.3530  | 450.1801        | 882.3264       | 441.6669         | 881.3424       | 441.1748         | S    | 2995.4313 | 1498.2193       | 2978.4048      | 1489.7060        | 2977.4208      | 1489.2140        | 28 |
| 9  | 1013.3959 | 507.2016        | 996.3694       | 498.6883         | 995.3853       | 498.1963         | N    | 2908.3993 | 1454.7033       | 2891.3727      | 1446.1900        | 2890.3887      | 1445.6980        | 27 |
| 10 | 1084.4330 | 542.7202        | 1067.4065      | 534.2069         | 1066.4225      | 533.7149         | A    | 2794.3564 | 1397.6818       | 2777.3298      | 1389.1685        | 2776.3458      | 1388.6765        | 26 |
| 11 | 1185.4807 | 593.2440        | 1168.4542      | 584.7307         | 1167.4701      | 584.2387         | T    | 2723.3193 | 1362.1633       | 2706.2927      | 1353.6500        | 2705.3087      | 1353.1580        | 25 |
| 12 | 1286.5284 | 643.7678        | 1269.5018      | 635.2546         | 1268.5178      | 634.7625         | T    | 2622.2716 | 1311.6394       | 2605.2450      | 1303.1262        | 2604.2610      | 1302.6341        | 24 |
| 13 | 1401.5553 | 701.2813        | 1384.5288      | 692.7680         | 1383.5448      | 692.2760         | D    | 2521.2239 | 1261.1156       | 2504.1973      | 1252.6023        | 2503.2133      | 1252.1103        | 23 |
| 14 | 1530.5979 | 765.8026        | 1513.5714      | 757.2893         | 1512.5874      | 756.7973         | E    | 2406.1970 | 1203.6021       | 2389.1704      | 1195.0888        | 2388.1864      | 1194.5968        | 22 |
| 15 | 1667.6568 | 834.3321        | 1650.6303      | 825.8188         | 1649.6463      | 825.3268         | H    | 2277.1544 | 1139.0808       | 2260.1278      | 1130.5675        | 2259.1438      | 1130.0755        | 21 |
| 16 | 1724.6783 | 862.8428        | 1707.6517      | 854.3295         | 1706.6677      | 853.8375         | G    | 2140.0954 | 1070.5514       | 2123.0689      | 1062.0381        | 2122.0849      | 1061.5461        | 20 |
| 17 | 1837.7624 | 919.3848        | 1820.7358      | 910.8715         | 1819.7518      | 910.3795         | L    | 2083.0740 | 1042.0406       | 2066.0474      | 1033.5274        | 2065.0634      | 1033.0353        | 19 |
| 18 | 1936.8308 | 968.9190        | 1919.8042      | 960.4058         | 1918.8202      | 959.9137         | V    | 1969.9899 | 985.4986        | 1952.9634      | 976.9853         | 1951.9794      | 976.4933         | 18 |
| 19 | 2065.8734 | 1033.4403       | 2048.8468      | 1024.9270        | 2047.8628      | 1024.4350        | Q    | 1870.9215 | 935.9644        | 1853.8950      | 927.4511         | 1852.9109      | 926.9591         | 17 |
| 20 | 2212.9418 | 1106.9745       | 2195.9152      | 1098.4613        | 2194.9312      | 1097.9692        | F    | 1741.8789 | 871.4431        | 1724.8524      | 862.9298         | 1723.8683      | 862.4378         | 16 |
| 21 | 2299.9738 | 1150.4905       | 2282.9473      | 1141.9773        | 2281.9632      | 1141.4853        | S    | 1594.8105 | 797.9089        | 1577.7839      | 789.3956         | 1576.7999      | 788.9036         | 15 |
| 22 | 2413.0579 | 1207.0326       | 2396.0313      | 1198.5193        | 2395.0473      | 1198.0273        | I    | 1507.7785 | 754.3929        | 1490.7519      | 745.8796         | 1489.7679      | 745.3876         | 14 |

|    |           |                  |           |                  |           |                  |   |                  |                 |                 |                 |                 |                 |    |
|----|-----------|------------------|-----------|------------------|-----------|------------------|---|------------------|-----------------|-----------------|-----------------|-----------------|-----------------|----|
| 23 | 2528.0848 | 1264.5460        | 2511.0583 | 1256.0328        | 2510.0743 | 1255.5408        | N | <b>1394.6944</b> | 697.8508        | 1377.6679       | 689.3376        | 1376.6838       | 688.8456        | 13 |
| 24 | 2629.1325 | 1315.0699        | 2612.1059 | 1306.5566        | 2611.1219 | 1306.0646        | T | 1279.6675        | 640.3374        | 1262.6409       | <b>631.8241</b> | 1261.6569       | <b>631.3321</b> | 12 |
| 25 | 2730.1802 | 1365.5937        | 2713.1536 | 1357.0805        | 2712.1696 | 1356.5884        | T | <b>1178.6198</b> | 589.8135        | 1161.5932       | 581.3003        | 1160.6092       | 580.8082        | 11 |
| 26 | 2844.2231 | <b>1422.6152</b> | 2827.1966 | 1414.1019        | 2826.2125 | 1413.6099        | N | <b>1077.5721</b> | 539.2897        | 1060.5456       | <b>530.7764</b> | 1059.5615       | 530.2844        | 10 |
| 27 | 2943.2915 | <b>1472.1494</b> | 2926.2650 | <b>1463.6361</b> | 2925.2810 | <b>1463.1441</b> | V | <b>963.5292</b>  | 482.2682        | 946.5026        | <b>473.7550</b> | 945.5186        | 473.2629        | 9  |
| 28 | 3074.3320 | <b>1537.6696</b> | 3057.3055 | <b>1529.1564</b> | 3056.3214 | <b>1528.6644</b> | M | <b>864.4608</b>  | <b>432.7340</b> | <b>847.4342</b> | 424.2207        | <b>846.4502</b> | 423.7287        | 8  |
| 29 | 3131.3535 | 1566.1804        | 3114.3269 | 1557.6671        | 3113.3429 | 1557.1751        | G | <b>733.4203</b>  | 367.2138        | <b>716.3937</b> | 358.7005        | <b>715.4097</b> | 358.2085        | 7  |
| 30 | 3232.4011 | <b>1616.7042</b> | 3215.3746 | <b>1608.1909</b> | 3214.3906 | 1607.6989        | T | <b>676.3988</b>  | 338.7030        | 659.3723        | 330.1898        | 658.3883        | 329.6978        | 6  |
| 31 | 3319.4332 | 1660.2202        | 3302.4066 | 1651.7070        | 3301.4226 | 1651.2149        | S | <b>575.3511</b>  | 288.1792        | 558.3246        | 279.6659        | <b>557.3406</b> | 279.1739        | 5  |
| 32 | 3432.5172 | <b>1716.7623</b> | 3415.4907 | 1708.2490        | 3414.5067 | 1707.7570        | L | <b>488.3191</b>  | 244.6632        | 471.2926        | 236.1499        | 470.3085        | 235.6579        | 4  |
| 33 | 3533.5649 | 1767.2861        | 3516.5384 | 1758.7728        | 3515.5544 | 1758.2808        | T | <b>375.2350</b>  | 188.1212        | 358.2085        | 179.6079        | 357.2245        | 179.1159        | 3  |
| 34 | 3632.6333 | 1816.8203        | 3615.6068 | <b>1808.3070</b> | 3614.6228 | <b>1807.8150</b> | V | 274.1874         | 137.5973        | 257.1608        | 129.0840        |                 |                 | 2  |
| 35 |           |                  |           |                  |           |                  | R | 175.1190         | 88.0631         | 158.0924        | 79.5498         |                 |                 | 1  |

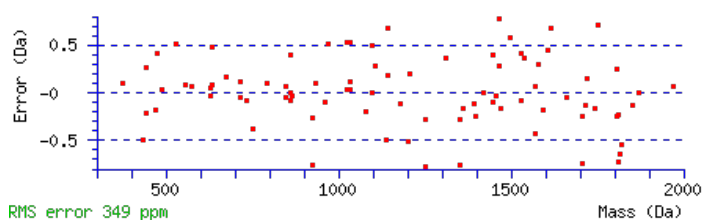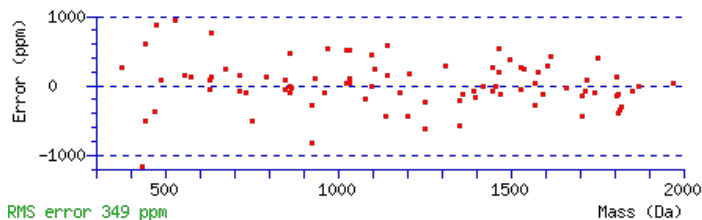

NCBI BLAST search of [GNEANYYSNATTDEHGLVQFSINTTNVMGTSLTVR](#)

(Parameters: blastp, nr protein database, expect=20000, no filter, PAM30)

Other BLAST [web gateways](#)

All matches to this query

| Score | Mr(calc)  | Delta  | Sequence                                            | Site Analysis              |
|-------|-----------|--------|-----------------------------------------------------|----------------------------|
| 85.5  | 3805.7377 | 1.0037 | <a href="#">GNEANYYSNATTDEHGLVQFSINTTNVMGTSLTVR</a> | Deamidated Q19, N23 49.75% |
| 82.5  | 3805.7377 | 1.0037 | <a href="#">GNEANYYSNATTDEHGLVQFSINTTNVMGTSLTVR</a> | Deamidated N9, N23 25.46%  |
| 78.3  | 3805.7377 | 1.0037 | <a href="#">GNEANYYSNATTDEHGLVQFSINTTNVMGTSLTVR</a> | Deamidated Q19, N26 9.46%  |
| 75.5  | 3805.7377 | 1.0037 | <a href="#">GNEANYYSNATTDEHGLVQFSINTTNVMGTSLTVR</a> | Deamidated N9, N26 4.98%   |
| 75.2  | 3805.7377 | 1.0037 | <a href="#">GNEANYYSNATTDEHGLVQFSINTTNVMGTSLTVR</a> | Deamidated N5, N23 4.70%   |
| 69.4  | 3805.7377 | 1.0037 | <a href="#">GNEANYYSNATTDEHGLVQFSINTTNVMGTSLTVR</a> | Deamidated N2, N23 1.23%   |
| 68.4  | 3805.7377 | 1.0037 | <a href="#">GNEANYYSNATTDEHGLVQFSINTTNVMGTSLTVR</a> | Deamidated N5, N26 0.98%   |
| 68.3  | 3805.7377 | 1.0037 | <a href="#">GNEANYYSNATTDEHGLVQFSINTTNVMGTSLTVR</a> | Deamidated N9, Q19 0.96%   |
| 67.2  | 3804.7537 | 1.9877 | <a href="#">GNEANYYSNATTDEHGLVQFSINTTNVMGTSLTVR</a> |                            |
| 64.8  | 3805.7377 | 1.0037 | <a href="#">GNEANYYSNATTDEHGLVQFSINTTNVMGTSLTVR</a> | Deamidated N23, N26 0.43%  |

Mascot: <http://www.matrixscience.com/>

# MASCOT SCIENCE Mascot Search Results

## Peptide View

MS/MS Fragmentation of **GNEANYNSNATDEHGLVQFSINTTNVMGTSLTVR**

Found in **P01023** in **con\_Xuniprot\_HUMAN3**, A2MG\_HUMAN Alpha-2-macroglobulin OS=Homo sapiens GN=A2M PE=1 SV=3

Match to Query 28080: 3806.763192 from(1269.928340,3+) intensity(0.0000) rtinseconds(3114) scans(8290) index(1726)

Title: 111019\_Est\_ISCardio\_NMI\_YP\_G\_3Spectrum7285\_scans\_\_8290

Data file C:\mascot\20140703\_Tmgf\_1D\CSV\_UseAnalysis\MasterCSV\All\_Glyco\mgf\ptm\UC18ERLIC\_PTM\_35D.mgf

Click mouse within plot area to zoom in by factor of two about that point

Or,  to  Da

Label all possible matches  Label matches used for scoring

Show Y-axis

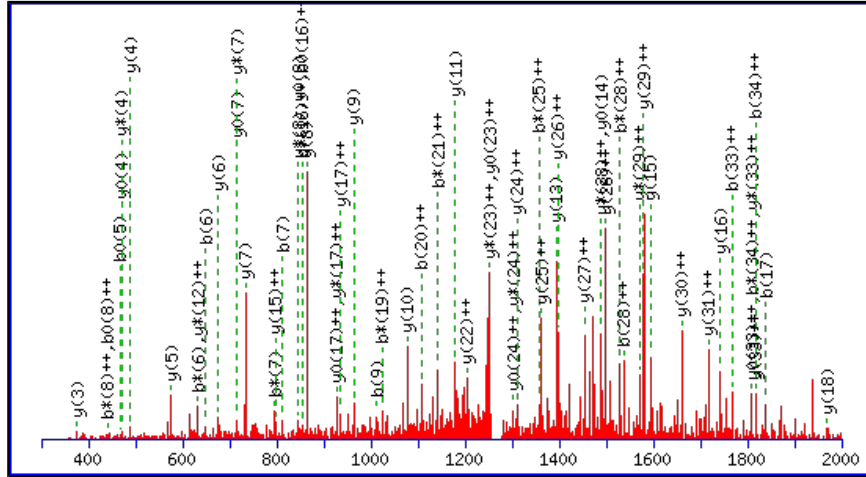

Monoisotopic mass of neutral peptide Mr(calc): 3804.7537

Fixed modifications: Carbamidomethyl (C) (apply to specified residues or termini only)

Variable modifications:

N23 : Deamidated (NQ)

Ions Score: 85 Expect: 6.7e-007

Matches : 63/398 fragment ions using 102 most intense peaks ([help](#))

| #  | b         | b <sup>++</sup> | b <sup>*</sup> | b <sup>*++</sup> | b <sup>0</sup> | b <sup>0++</sup> | Seq. | y         | y <sup>++</sup> | y <sup>*</sup> | y <sup>*++</sup> | y <sup>0</sup> | y <sup>0++</sup> | #  |
|----|-----------|-----------------|----------------|------------------|----------------|------------------|------|-----------|-----------------|----------------|------------------|----------------|------------------|----|
| 1  | 58.0287   | 29.5180         |                |                  |                |                  | G    |           |                 |                |                  |                |                  | 35 |
| 2  | 172.0717  | 86.5395         | 155.0451       | 78.0262          |                |                  | N    | 3748.7395 | 1874.8734       | 3731.7130      | 1866.3601        | 3730.7290      | 1865.8681        | 34 |
| 3  | 301.1143  | 151.0608        | 284.0877       | 142.5475         | 283.1037       | 142.0555         | E    | 3634.6966 | 1817.8519       | 3617.6701      | 1809.3387        | 3616.6860      | 1808.8467        | 33 |
| 4  | 372.1514  | 186.5793        | 355.1248       | 178.0661         | 354.1408       | 177.5740         | A    | 3505.6540 | 1753.3306       | 3488.6275      | 1744.8174        | 3487.6434      | 1744.3254        | 32 |
| 5  | 486.1943  | 243.6008        | 469.1678       | 235.0875         | 468.1837       | 234.5955         | N    | 3434.6169 | 1717.8121       | 3417.5903      | 1709.2988        | 3416.6063      | 1708.8068        | 31 |
| 6  | 649.2576  | 325.1325        | 632.2311       | 316.6192         | 631.2471       | 316.1272         | Y    | 3320.5740 | 1660.7906       | 3303.5474      | 1652.2773        | 3302.5634      | 1651.7853        | 30 |
| 7  | 812.3210  | 406.6641        | 795.2944       | 398.1508         | 794.3104       | 397.6588         | Y    | 3157.5106 | 1579.2590       | 3140.4841      | 1570.7457        | 3139.5001      | 1570.2537        | 29 |
| 8  | 899.3530  | 450.1801        | 882.3264       | 441.6669         | 881.3424       | 441.1748         | S    | 2994.4473 | 1497.7273       | 2977.4208      | 1489.2140        | 2976.4367      | 1488.7220        | 28 |
| 9  | 1013.3959 | 507.2016        | 996.3694       | 498.6883         | 995.3853       | 498.1963         | N    | 2907.4153 | 1454.2113       | 2890.3887      | 1445.6980        | 2889.4047      | 1445.2060        | 27 |
| 10 | 1084.4330 | 542.7202        | 1067.4065      | 534.2069         | 1066.4225      | 533.7149         | A    | 2793.3724 | 1397.1898       | 2776.3458      | 1388.6765        | 2775.3618      | 1388.1845        | 26 |
| 11 | 1185.4807 | 593.2440        | 1168.4542      | 584.7307         | 1167.4701      | 584.2387         | T    | 2722.3352 | 1361.6713       | 2705.3087      | 1353.1580        | 2704.3247      | 1352.6660        | 25 |
| 12 | 1286.5284 | 643.7678        | 1269.5018      | 635.2546         | 1268.5178      | 634.7625         | T    | 2621.2876 | 1311.1474       | 2604.2610      | 1302.6341        | 2603.2770      | 1302.1421        | 24 |
| 13 | 1401.5553 | 701.2813        | 1384.5288      | 692.7680         | 1383.5448      | 692.2760         | D    | 2520.2399 | 1260.6236       | 2503.2133      | 1252.1103        | 2502.2293      | 1251.6183        | 23 |
| 14 | 1530.5979 | 765.8026        | 1513.5714      | 757.2893         | 1512.5874      | 756.7973         | E    | 2405.2129 | 1203.1101       | 2388.1864      | 1194.5968        | 2387.2024      | 1194.1048        | 22 |
| 15 | 1667.6568 | 834.3321        | 1650.6303      | 825.8188         | 1649.6463      | 825.3268         | H    | 2276.1703 | 1138.5888       | 2259.1438      | 1130.0755        | 2258.1598      | 1129.5835        | 21 |
| 16 | 1724.6783 | 862.8428        | 1707.6517      | 854.3295         | 1706.6677      | 853.8375         | G    | 2139.1114 | 1070.0594       | 2122.0849      | 1061.5461        | 2121.1009      | 1061.0541        | 20 |
| 17 | 1837.7624 | 919.3848        | 1820.7358      | 910.8715         | 1819.7518      | 910.3795         | L    | 2082.0900 | 1041.5486       | 2065.0634      | 1033.0353        | 2064.0794      | 1032.5433        | 19 |
| 18 | 1936.8308 | 968.9190        | 1919.8042      | 960.4058         | 1918.8202      | 959.9137         | V    | 1969.0059 | 985.0066        | 1951.9794      | 976.4933         | 1950.9953      | 976.0013         | 18 |
| 19 | 2064.8894 | 1032.9483       | 2047.8628      | 1024.4350        | 2046.8788      | 1023.9430        | Q    | 1869.9375 | 935.4724        | 1852.9109      | 926.9591         | 1851.9269      | 926.4671         | 17 |
| 20 | 2211.9578 | 1106.4825       | 2194.9312      | 1097.9692        | 2193.9472      | 1097.4772        | F    | 1741.8789 | 871.4431        | 1724.8524      | 862.9298         | 1723.8683      | 862.4378         | 16 |
| 21 | 2298.9898 | 1149.9985       | 2281.9632      | 1141.4853        | 2280.9792      | 1140.9933        | S    | 1594.8105 | 797.9089        | 1577.7839      | 789.3956         | 1576.7999      | 788.9036         | 15 |
| 22 | 2412.0739 | 1206.5406       | 2395.0473      | 1198.0273        | 2394.0633      | 1197.5353        | I    | 1507.7785 | 754.3929        | 1490.7519      | 745.8796         | 1489.7679      | 745.3876         | 14 |
| 23 | 2527.1008 | 1264.0540       | 2510.0743      | 1255.5408        | 2509.0902      | 1255.0488        | N    | 1394.6944 | 697.8508        | 1377.6679      | 689.3376         | 1376.6838      | 688.8456         | 13 |

|    |           |           |           |           |           |           |   |           |          |           |          |           |          |    |
|----|-----------|-----------|-----------|-----------|-----------|-----------|---|-----------|----------|-----------|----------|-----------|----------|----|
| 24 | 2628.1485 | 1314.5779 | 2611.1219 | 1306.0646 | 2610.1379 | 1305.5726 | T | 1279.6675 | 640.3374 | 1262.6409 | 631.8241 | 1261.6569 | 631.3321 | 12 |
| 25 | 2729.1962 | 1365.1017 | 2712.1696 | 1356.5884 | 2711.1856 | 1356.0964 | T | 1178.6198 | 589.8135 | 1161.5932 | 581.3003 | 1160.6092 | 580.8082 | 11 |
| 26 | 2843.2391 | 1422.1232 | 2826.2125 | 1413.6099 | 2825.2285 | 1413.1179 | N | 1077.5721 | 539.2897 | 1060.5456 | 530.7764 | 1059.5615 | 530.2844 | 10 |
| 27 | 2942.3075 | 1471.6574 | 2925.2810 | 1463.1441 | 2924.2969 | 1462.6521 | V | 963.5292  | 482.2682 | 946.5026  | 473.7550 | 945.5186  | 473.2629 | 9  |
| 28 | 3073.3480 | 1537.1776 | 3056.3214 | 1528.6644 | 3055.3374 | 1528.1723 | M | 864.4608  | 432.7340 | 847.4342  | 424.2207 | 846.4502  | 423.7287 | 8  |
| 29 | 3130.3695 | 1565.6884 | 3113.3429 | 1557.1751 | 3112.3589 | 1556.6831 | G | 733.4203  | 367.2138 | 716.3937  | 358.7005 | 715.4097  | 358.2085 | 7  |
| 30 | 3231.4171 | 1616.2122 | 3214.3906 | 1607.6989 | 3213.4066 | 1607.2069 | T | 676.3988  | 338.7030 | 659.3723  | 330.1898 | 658.3883  | 329.6978 | 6  |
| 31 | 3318.4492 | 1659.7282 | 3301.4226 | 1651.2149 | 3300.4386 | 1650.7229 | S | 575.3511  | 288.1792 | 558.3246  | 279.6659 | 557.3406  | 279.1739 | 5  |
| 32 | 3431.5332 | 1716.2702 | 3414.5067 | 1707.7570 | 3413.5227 | 1707.2650 | L | 488.3191  | 244.6632 | 471.2926  | 236.1499 | 470.3085  | 235.6579 | 4  |
| 33 | 3532.5809 | 1766.7941 | 3515.5544 | 1758.2808 | 3514.5703 | 1757.7888 | T | 375.2350  | 188.1212 | 358.2085  | 179.6079 | 357.2245  | 179.1159 | 3  |
| 34 | 3631.6493 | 1816.3283 | 3614.6228 | 1807.8150 | 3613.6387 | 1807.3230 | V | 274.1874  | 137.5973 | 257.1608  | 129.0840 |           |          | 2  |
| 35 |           |           |           |           |           |           | R | 175.1190  | 88.0631  | 158.0924  | 79.5498  |           |          | 1  |

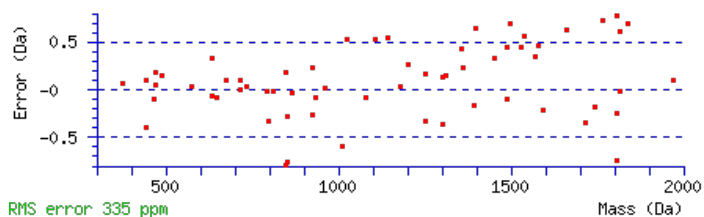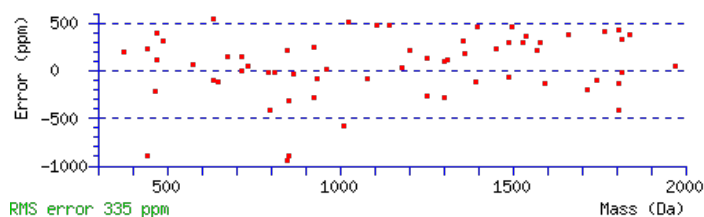

NCBI BLAST search of [GNEANYYSNATTDEHGLVQFSINTTNVMGTSLTVR](#)

(Parameters: blastp, nr protein database, expect=20000, no filter, PAM30)

Other BLAST [web gateways](#)

All matches to this query

| Score | Mr(calc)  | Delta   | Sequence                                                     | Site Analysis         |
|-------|-----------|---------|--------------------------------------------------------------|-----------------------|
| 85.0  | 3804.7537 | 2.0095  | <a href="#">GNEANYYSNATTDEHGLVQFSINTTNVMGTSLTVR</a>          | Deamidated N23 85.41% |
| 76.2  | 3804.7537 | 2.0095  | <a href="#">GNEANYYSNATTDEHGLVQFSINTTNVMGTSLTVR</a>          | Deamidated N26 11.36% |
| 70.0  | 3804.7537 | 2.0095  | <a href="#">GNEANYYSNATTDEHGLVQFSINTTNVMGTSLTVR</a>          | Deamidated Q19 2.75%  |
| 62.4  | 3804.7537 | 2.0095  | <a href="#">GNEANYYSNATTDEHGLVQFSINTTNVMGTSLTVR</a>          | Deamidated N9 0.48%   |
| 25.1  | 3804.7537 | 2.0095  | <a href="#">GNEANYYSNATTDEHGLVQFSINTTNVMGTSLTVR</a>          | Deamidated N5 0.00%   |
| 24.5  | 3804.7537 | 2.0095  | <a href="#">GNEANYYSNATTDEHGLVQFSINTTNVMGTSLTVR</a>          | Deamidated N2 0.00%   |
| 12.9  | 3806.7722 | -0.0090 | <a href="#">LKPMGAQFLGGLGPPGGGGFSGGGGGGGGGFSGGGGGGGGAGAR</a> |                       |
| 11.0  | 3805.7702 | 0.9929  | <a href="#">EDLEYDPYELMETVKVTGPVEAPEGPGGANCALVR</a>          |                       |
| 7.8   | 3805.7525 | 1.0107  | <a href="#">DGILMTFNTIFAAPIQMQFEIDQDESARNLMR</a>             |                       |
| 7.7   | 3805.7525 | 1.0107  | <a href="#">DGILMTFNTIFAAPIQMQFEIDQDESARNLMR</a>             |                       |

Mascot: <http://www.matrixscience.com/>

# MATRIX SCIENCE Mascot Search Results

## Peptide View

MS/MS Fragmentation of **GNEANYYSNATDEHGLVQFSINTTNVMGTSLTVR**

Found in **P01023** in **con\_Xuniprot\_HUMAN3**, A2MG\_HUMAN Alpha-2-macroglobulin OS=Homo sapiens GN=A2M PE=1 SV=3

Match to Query 28073: 3805.756512 from(1269.592780,3+) intensity(19010.5195) rtinseconds(3040) scans(8089) index(1700)

Title: 111019\_Est\_ISCardio\_NMI\_YP\_G\_3Spectrum7104\_scans\_\_8089

Data file C:\mascot\20140703\_Tmgf\_1D\CSV\_UseAnalysis\MasterCSV\All\_Glyco\mgf\ptm\UC18ERLIC\_PTM\_35D.mgf

Click mouse within plot area to zoom in by factor of two about that point

Or, to Da

Label all possible matches Label matches used for scoring

Show Y-axis

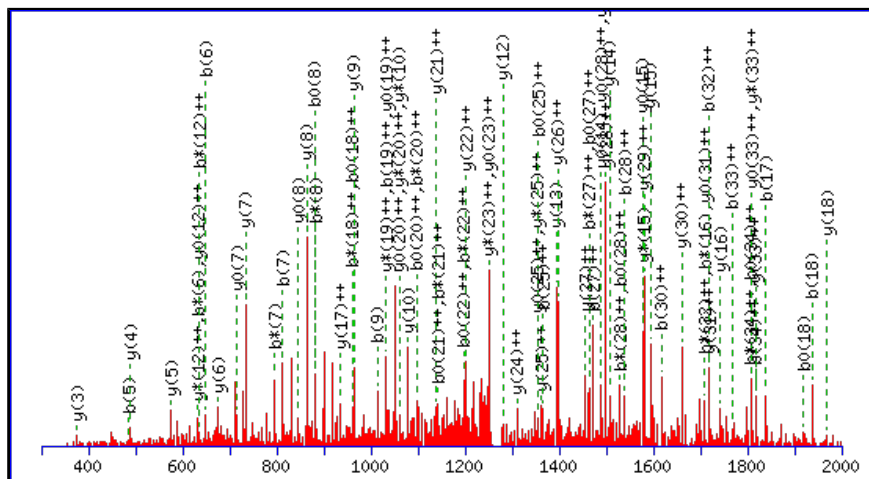

Monoisotopic mass of neutral peptide Mr(calc): 3805.7377

Fixed modifications: Carbamidomethyl (C) (apply to specified residues or termini only)

Variable modifications:

N9 : Deamidated (NQ)

N26 : Deamidated (NQ)

Ions Score: 77 Expect: 3.5e-006

Matches : 84/398 fragment ions using 153 most intense peaks ([help](#))

| #  | b                | b <sup>++</sup>  | b <sup>*</sup>   | b <sup>*++</sup> | b <sup>0</sup>   | b <sup>0++</sup> | Seq.     | y                | y <sup>++</sup>  | y <sup>*</sup>   | y <sup>*++</sup> | y <sup>0</sup>   | y <sup>0++</sup> | #         |
|----|------------------|------------------|------------------|------------------|------------------|------------------|----------|------------------|------------------|------------------|------------------|------------------|------------------|-----------|
| 1  | 58.0287          | 29.5180          |                  |                  |                  |                  | <b>G</b> |                  |                  |                  |                  |                  |                  | <b>35</b> |
| 2  | 172.0717         | 86.5395          | 155.0451         | 78.0262          |                  |                  | <b>N</b> | 3749.7235        | 1875.3654        | 3732.6970        | 1866.8521        | 3731.7130        | 1866.3601        | <b>34</b> |
| 3  | 301.1143         | 151.0608         | 284.0877         | 142.5475         | 283.1037         | 142.0555         | <b>E</b> | 3635.6806        | <b>1818.3439</b> | 3618.6541        | <b>1809.8307</b> | 3617.6701        | <b>1809.3387</b> | <b>33</b> |
| 4  | 372.1514         | 186.5793         | 355.1248         | 178.0661         | 354.1408         | 177.5740         | <b>A</b> | 3506.6380        | 1753.8226        | 3489.6115        | 1745.3094        | 3488.6275        | 1744.8174        | <b>32</b> |
| 5  | <b>486.1943</b>  | 243.6008         | 469.1678         | 235.0875         | 468.1837         | 234.5955         | <b>N</b> | 3435.6009        | <b>1718.3041</b> | 3418.5744        | 1709.7908        | 3417.5903        | <b>1709.2988</b> | <b>31</b> |
| 6  | <b>649.2576</b>  | 325.1325         | <b>632.2311</b>  | 316.6192         | 631.2471         | 316.1272         | <b>Y</b> | 3321.5580        | <b>1661.2826</b> | 3304.5314        | 1652.7694        | 3303.5474        | 1652.2773        | <b>30</b> |
| 7  | <b>812.3210</b>  | 406.6641         | <b>795.2944</b>  | 398.1508         | 794.3104         | 397.6588         | <b>Y</b> | 3158.4947        | <b>1579.7510</b> | 3141.4681        | 1571.2377        | 3140.4841        | 1570.7457        | <b>29</b> |
| 8  | 899.3530         | 450.1801         | <b>882.3264</b>  | 441.6669         | <b>881.3424</b>  | 441.1748         | <b>S</b> | 2995.4313        | <b>1498.2193</b> | 2978.4048        | <b>1489.7060</b> | 2977.4208        | <b>1489.2140</b> | <b>28</b> |
| 9  | <b>1014.3799</b> | 507.6936         | 997.3534         | 499.1803         | 996.3694         | 498.6883         | <b>N</b> | 2908.3993        | <b>1454.7033</b> | 2891.3727        | 1446.1900        | 2890.3887        | 1445.6980        | <b>27</b> |
| 10 | 1085.4170        | 543.2122         | 1068.3905        | 534.6989         | 1067.4065        | 534.2069         | <b>A</b> | 2793.3724        | <b>1397.1898</b> | 2776.3458        | 1388.6765        | 2775.3618        | 1388.1845        | <b>26</b> |
| 11 | 1186.4647        | 593.7360         | 1169.4382        | 585.2227         | 1168.4542        | 584.7307         | <b>T</b> | 2722.3352        | <b>1361.6713</b> | 2705.3087        | <b>1353.1580</b> | 2704.3247        | <b>1352.6660</b> | <b>25</b> |
| 12 | 1287.5124        | 644.2598         | 1270.4859        | <b>635.7466</b>  | 1269.5018        | 635.2546         | <b>T</b> | 2621.2876        | <b>1311.1474</b> | 2604.2610        | 1302.6341        | 2603.2770        | 1302.1421        | <b>24</b> |
| 13 | 1402.5393        | 701.7733         | 1385.5128        | 693.2600         | 1384.5288        | 692.7680         | <b>D</b> | 2520.2399        | 1260.6236        | 2503.2133        | <b>1252.1103</b> | 2502.2293        | <b>1251.6183</b> | <b>23</b> |
| 14 | 1531.5819        | 766.2946         | 1514.5554        | 757.7813         | 1513.5714        | 757.2893         | <b>E</b> | 2405.2129        | <b>1203.1101</b> | 2388.1864        | 1194.5968        | 2387.2024        | 1194.1048        | <b>22</b> |
| 15 | 1668.6409        | 834.8241         | 1651.6143        | 826.3108         | 1650.6303        | 825.8188         | <b>H</b> | 2276.1703        | <b>1138.5888</b> | 2259.1438        | 1130.0755        | 2258.1598        | 1129.5835        | <b>21</b> |
| 16 | 1725.6623        | 863.3348         | <b>1708.6358</b> | 854.8215         | 1707.6517        | 854.3295         | <b>G</b> | 2139.1114        | 1070.0594        | 2122.0849        | <b>1061.5461</b> | 2121.1009        | <b>1061.0541</b> | <b>20</b> |
| 17 | <b>1838.7464</b> | 919.8768         | 1821.7198        | 911.3636         | 1820.7358        | 910.8715         | <b>L</b> | 2082.0900        | 1041.5486        | 2065.0634        | <b>1033.0353</b> | 2064.0794        | <b>1032.5433</b> | <b>19</b> |
| 18 | <b>1937.8148</b> | 969.4110         | 1920.7882        | <b>960.8978</b>  | <b>1919.8042</b> | <b>960.4058</b>  | <b>V</b> | <b>1969.0059</b> | 985.0066         | 1951.9794        | 976.4933         | 1950.9953        | 976.0013         | <b>18</b> |
| 19 | 2065.8734        | <b>1033.4403</b> | 2048.8468        | 1024.9270        | 2047.8628        | 1024.4350        | <b>Q</b> | 1869.9375        | <b>935.4724</b>  | 1852.9109        | 926.9591         | 1851.9269        | 926.4671         | <b>17</b> |
| 20 | 2212.9418        | 1106.9745        | 2195.9152        | <b>1098.4613</b> | 2194.9312        | <b>1097.9692</b> | <b>F</b> | <b>1741.8789</b> | 871.4431         | 1724.8524        | 862.9298         | 1723.8683        | 862.4378         | <b>16</b> |
| 21 | 2299.9738        | 1150.4905        | 2282.9473        | <b>1141.9773</b> | 2281.9632        | <b>1141.4853</b> | <b>S</b> | <b>1594.8105</b> | 797.9089         | <b>1577.7839</b> | 789.3956         | <b>1576.7999</b> | 788.9036         | <b>15</b> |
| 22 | 2413.0579        | 1207.0326        | 2396.0313        | <b>1198.5193</b> | 2395.0473        | <b>1198.0273</b> | <b>I</b> | <b>1507.7785</b> | 754.3929         | 1490.7519        | 745.8796         | <b>1489.7679</b> | 745.3876         | <b>14</b> |



|    |           |                  |           |                  |           |                  |   |                  |          |                  |                 |                 |                 |    |
|----|-----------|------------------|-----------|------------------|-----------|------------------|---|------------------|----------|------------------|-----------------|-----------------|-----------------|----|
| 23 | 2527.1008 | 1264.0540        | 2510.0743 | 1255.5408        | 2509.0902 | 1255.0488        | N | <b>1394.6944</b> | 697.8508 | 1377.6679        | 689.3376        | 1376.6838       | 688.8456        | 13 |
| 24 | 2628.1485 | 1314.5779        | 2611.1219 | 1306.0646        | 2610.1379 | 1305.5726        | T | <b>1280.6515</b> | 640.8294 | 1263.6249        | <b>632.3161</b> | 1262.6409       | <b>631.8241</b> | 12 |
| 25 | 2729.1962 | <b>1365.1017</b> | 2712.1696 | 1356.5884        | 2711.1856 | <b>1356.0964</b> | T | 1179.6038        | 590.3055 | 1162.5773        | 581.7923        | 1161.5932       | 581.3003        | 11 |
| 26 | 2844.2231 | 1422.6152        | 2827.1966 | 1414.1019        | 2826.2125 | 1413.6099        | N | <b>1078.5561</b> | 539.7817 | <b>1061.5296</b> | 531.2684        | 1060.5456       | 530.7764        | 10 |
| 27 | 2943.2915 | <b>1472.1494</b> | 2926.2650 | <b>1463.6361</b> | 2925.2810 | <b>1463.1441</b> | V | <b>963.5292</b>  | 482.2682 | 946.5026         | 473.7550        | 945.5186        | 473.2629        | 9  |
| 28 | 3074.3320 | <b>1537.6696</b> | 3057.3055 | <b>1529.1564</b> | 3056.3214 | <b>1528.6644</b> | M | <b>864.4608</b>  | 432.7340 | 847.4342         | 424.2207        | <b>846.4502</b> | 423.7287        | 8  |
| 29 | 3131.3535 | 1566.1804        | 3114.3269 | 1557.6671        | 3113.3429 | 1557.1751        | G | <b>733.4203</b>  | 367.2138 | 716.3937         | 358.7005        | <b>715.4097</b> | 358.2085        | 7  |
| 30 | 3232.4011 | <b>1616.7042</b> | 3215.3746 | 1608.1909        | 3214.3906 | 1607.6989        | T | <b>676.3988</b>  | 338.7030 | 659.3723         | 330.1898        | 658.3883        | 329.6978        | 6  |
| 31 | 3319.4332 | 1660.2202        | 3302.4066 | 1651.7070        | 3301.4226 | 1651.2149        | S | <b>575.3511</b>  | 288.1792 | 558.3246         | 279.6659        | 557.3406        | 279.1739        | 5  |
| 32 | 3432.5172 | <b>1716.7623</b> | 3415.4907 | <b>1708.2490</b> | 3414.5067 | 1707.7570        | L | <b>488.3191</b>  | 244.6632 | 471.2926         | 236.1499        | 470.3085        | 235.6579        | 4  |
| 33 | 3533.5649 | <b>1767.2861</b> | 3516.5384 | 1758.7728        | 3515.5544 | 1758.2808        | T | <b>375.2350</b>  | 188.1212 | 358.2085         | 179.6079        | 357.2245        | 179.1159        | 3  |
| 34 | 3632.6333 | <b>1816.8203</b> | 3615.6068 | <b>1808.3070</b> | 3614.6228 | <b>1807.8150</b> | V | 274.1874         | 137.5973 | 257.1608         | 129.0840        |                 |                 | 2  |
| 35 |           |                  |           |                  |           |                  | R | 175.1190         | 88.0631  | 158.0924         | 79.5498         |                 |                 | 1  |

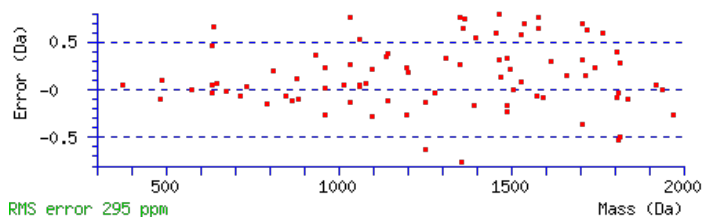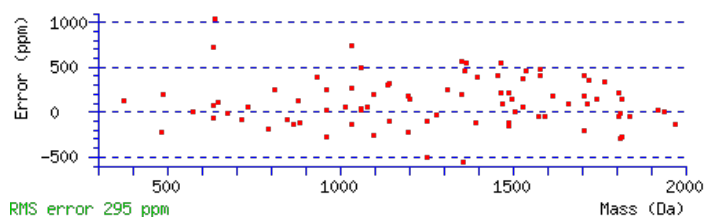

NCBI BLAST search of [GNEANYYSNATTDEHGLVQFSINTTNVMGTSLTVR](#)

(Parameters: blastp, nr protein database, expect=20000, no filter, PAM30)

Other BLAST [web gateways](#)

All matches to this query

| Score | Mr(calc)  | Delta  | Sequence                                            | Site Analysis             |
|-------|-----------|--------|-----------------------------------------------------|---------------------------|
| 77.5  | 3805.7377 | 0.0188 | <a href="#">GNEANYYSNATTDEHGLVQFSINTTNVMGTSLTVR</a> | Deamidated N9, N26 25.68% |
| 76.7  | 3805.7377 | 0.0188 | <a href="#">GNEANYYSNATTDEHGLVQFSINTTNVMGTSLTVR</a> | Deamidated N9, N23 21.60% |
| 75.0  | 3805.7377 | 0.0188 | <a href="#">GNEANYYSNATTDEHGLVQFSINTTNVMGTSLTVR</a> | Deamidated N5, N26 14.51% |
| 74.3  | 3805.7377 | 0.0188 | <a href="#">GNEANYYSNATTDEHGLVQFSINTTNVMGTSLTVR</a> | Deamidated N5, N23 12.18% |
| 74.2  | 3805.7377 | 0.0188 | <a href="#">GNEANYYSNATTDEHGLVQFSINTTNVMGTSLTVR</a> | Deamidated N2, N26 11.98% |
| 73.4  | 3805.7377 | 0.0188 | <a href="#">GNEANYYSNATTDEHGLVQFSINTTNVMGTSLTVR</a> | Deamidated N2, N23 10.06% |
| 63.9  | 3805.7377 | 0.0188 | <a href="#">GNEANYYSNATTDEHGLVQFSINTTNVMGTSLTVR</a> | Deamidated Q19, N26 1.12% |
| 63.7  | 3805.7377 | 0.0188 | <a href="#">GNEANYYSNATTDEHGLVQFSINTTNVMGTSLTVR</a> | Deamidated N23, N26 1.07% |
| 61.8  | 3805.7377 | 0.0188 | <a href="#">GNEANYYSNATTDEHGLVQFSINTTNVMGTSLTVR</a> | Deamidated Q19, N23 0.69% |
| 56.9  | 3805.7377 | 0.0188 | <a href="#">GNEANYYSNATTDEHGLVQFSINTTNVMGTSLTVR</a> | Deamidated N9, Q19 0.22%  |

Mascot: <http://www.matrixscience.com/>

# MASCOT SCIENCE Mascot Search Results

## Peptide View

MS/MS Fragmentation of **SLGNVNFVSAEALQSQELCGTEVPSVPEHGRK**

Found in **H0YGH6** in **con\_Xuniprot\_HUMAN3**, H0YGH6\_HUMAN Alpha-2-macroglobulin (Fragment) OS=Homo sapiens GN=A2M PE=4 SV=1

Match to Query 27806: 3541.714576 from(886.435920,4+) intensity(25004.4238) rtinseconds(1873) scans(4740) index(14611)

Title: 111019\_Est\_MI\_YP\_G\_03Spectrum4112\_scans\_4740

Data file C:\mascot\20140703\_Tmgf\_1D\CSV\_UseAnalysis\MasterCSV\All\_Glyco\mgf\ptm\UC18ERLIC\_PTM\_35D.mgf

Click mouse within plot area to zoom in by factor of two about that point

Or, to Da

Label all possible matches Label matches used for scoring

Show Y-axis

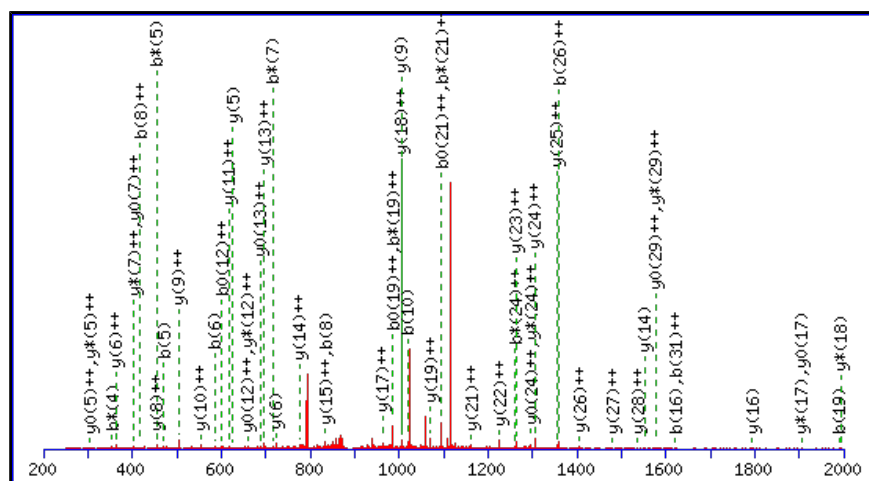

Monoisotopic mass of neutral peptide Mr(calc): 3541.6995

Fixed modifications: Carbamidomethyl (C) (apply to specified residues or termini only)

Variable modifications:

N6 : Deamidated (NQ)

Ions Score: 57 Expect: 0.00046

Matches : 56/370 fragment ions using 144 most intense peaks ([help](#))

| #  | b         | b <sup>++</sup> | b <sup>*</sup> | b <sup>***</sup> | b <sup>0</sup> | b <sup>0++</sup> | Seq. | y         | y <sup>++</sup> | y <sup>*</sup> | y <sup>***</sup> | y <sup>0</sup> | y <sup>0++</sup> | #  |
|----|-----------|-----------------|----------------|------------------|----------------|------------------|------|-----------|-----------------|----------------|------------------|----------------|------------------|----|
| 1  | 88.0393   | 44.5233         |                |                  | 70.0287        | 35.5180          | S    |           |                 |                |                  |                |                  | 33 |
| 2  | 201.1234  | 101.0653        |                |                  | 183.1128       | 92.0600          | L    | 3455.6747 | 1728.3410       | 3438.6482      | 1719.8277        | 3437.6642      | 1719.3357        | 32 |
| 3  | 258.1448  | 129.5761        |                |                  | 240.1343       | 120.5708         | G    | 3342.5907 | 1671.7990       | 3325.5641      | 1663.2857        | 3324.5801      | 1662.7937        | 31 |
| 4  | 372.1878  | 186.5975        | 355.1612       | 178.0842         | 354.1772       | 177.5922         | N    | 3285.5692 | 1643.2882       | 3268.5427      | 1634.7750        | 3267.5586      | 1634.2830        | 30 |
| 5  | 471.2562  | 236.1317        | 454.2296       | 227.6185         | 453.2456       | 227.1264         | V    | 3171.5263 | 1586.2668       | 3154.4997      | 1577.7535        | 3153.5157      | 1577.2615        | 29 |
| 6  | 586.2831  | 293.6452        | 569.2566       | 285.1319         | 568.2726       | 284.6399         | N    | 3072.4579 | 1536.7326       | 3055.4313      | 1528.2193        | 3054.4473      | 1527.7273        | 28 |
| 7  | 733.3515  | 367.1794        | 716.3250       | 358.6661         | 715.3410       | 358.1741         | F    | 2957.4309 | 1479.2191       | 2940.4044      | 1470.7058        | 2939.4204      | 1470.2138        | 27 |
| 8  | 834.3992  | 417.7032        | 817.3727       | 409.1900         | 816.3886       | 408.6980         | T    | 2810.3625 | 1405.6849       | 2793.3360      | 1397.1716        | 2792.3519      | 1396.6796        | 26 |
| 9  | 933.4676  | 467.2374        | 916.4411       | 458.7242         | 915.4571       | 458.2322         | V    | 2709.3148 | 1355.1611       | 2692.2883      | 1346.6478        | 2691.3043      | 1346.1558        | 25 |
| 10 | 1020.4997 | 510.7535        | 1003.4731      | 502.2402         | 1002.4891      | 501.7482         | S    | 2610.2464 | 1305.6268       | 2593.2199      | 1297.1136        | 2592.2359      | 1296.6216        | 24 |
| 11 | 1091.5368 | 546.2720        | 1074.5102      | 537.7587         | 1073.5262      | 537.2667         | A    | 2523.2144 | 1262.1108       | 2506.1878      | 1253.5976        | 2505.2038      | 1253.1056        | 23 |
| 12 | 1220.5794 | 610.7933        | 1203.5528      | 602.2800         | 1202.5688      | 601.7880         | E    | 2452.1773 | 1226.5923       | 2435.1507      | 1218.0790        | 2434.1667      | 1217.5870        | 22 |
| 13 | 1291.6165 | 646.3119        | 1274.5899      | 637.7986         | 1273.6059      | 637.3066         | A    | 2323.1347 | 1162.0710       | 2306.1081      | 1153.5577        | 2305.1241      | 1153.0657        | 21 |
| 14 | 1404.7005 | 702.8539        | 1387.6740      | 694.3406         | 1386.6900      | 693.8486         | L    | 2252.0976 | 1126.5524       | 2235.0710      | 1118.0391        | 2234.0870      | 1117.5471        | 20 |
| 15 | 1533.7431 | 767.3752        | 1516.7166      | 758.8619         | 1515.7326      | 758.3699         | E    | 2139.0135 | 1070.0104       | 2121.9870      | 1061.4971        | 2121.0029      | 1061.0051        | 19 |
| 16 | 1620.7752 | 810.8912        | 1603.7486      | 802.3779         | 1602.7646      | 801.8859         | S    | 2009.9709 | 1005.4891       | 1992.9444      | 996.9758         | 1991.9604      | 996.4838         | 18 |
| 17 | 1748.8337 | 874.9205        | 1731.8072      | 866.4072         | 1730.8232      | 865.9152         | Q    | 1922.9389 | 961.9731        | 1905.9123      | 953.4598         | 1904.9283      | 952.9678         | 17 |
| 18 | 1877.8763 | 939.4418        | 1860.8498      | 930.9285         | 1859.8658      | 930.4365         | E    | 1794.8803 | 897.9438        | 1777.8538      | 889.4305         | 1776.8697      | 888.9385         | 16 |
| 19 | 1990.9604 | 995.9838        | 1973.9338      | 987.4706         | 1972.9498      | 986.9786         | L    | 1665.8377 | 833.4225        | 1648.8112      | 824.9092         | 1647.8272      | 824.4172         | 15 |
| 20 | 2150.9910 | 1075.9992       | 2133.9645      | 1067.4859        | 2132.9805      | 1066.9939        | C    | 1552.7537 | 776.8805        | 1535.7271      | 768.3672         | 1534.7431      | 767.8752         | 14 |
| 21 | 2208.0125 | 1104.5099       | 2190.9860      | 1095.9966        | 2190.0019      | 1095.5046        | G    | 1392.7230 | 696.8651        | 1375.6965      | 688.3519         | 1374.7124      | 687.8599         | 13 |
| 22 | 2309.0602 | 1155.0337       | 2292.0336      | 1146.5205        | 2291.0496      | 1146.0284        | T    | 1335.7015 | 668.3544        | 1318.6750      | 659.8411         | 1317.6910      | 659.3491         | 12 |



|    |           |           |           |           |           |           |   |           |          |           |          |           |          |    |
|----|-----------|-----------|-----------|-----------|-----------|-----------|---|-----------|----------|-----------|----------|-----------|----------|----|
| 23 | 2438.1028 | 1219.5550 | 2421.0762 | 1211.0418 | 2420.0922 | 1210.5497 | E | 1234.6539 | 617.8306 | 1217.6273 | 609.3173 | 1216.6433 | 608.8253 | 11 |
| 24 | 2537.1712 | 1269.0892 | 2520.1446 | 1260.5760 | 2519.1606 | 1260.0840 | V | 1105.6113 | 553.3093 | 1088.5847 | 544.7960 | 1087.6007 | 544.3040 | 10 |
| 25 | 2634.2240 | 1317.6156 | 2617.1974 | 1309.1023 | 2616.2134 | 1308.6103 | P | 1006.5429 | 503.7751 | 989.5163  | 495.2618 | 988.5323  | 494.7698 | 9  |
| 26 | 2721.2560 | 1361.1316 | 2704.2294 | 1352.6184 | 2703.2454 | 1352.1263 | S | 909.4901  | 455.2487 | 892.4635  | 446.7354 | 891.4795  | 446.2434 | 8  |
| 27 | 2820.3244 | 1410.6658 | 2803.2978 | 1402.1526 | 2802.3138 | 1401.6606 | V | 822.4581  | 411.7327 | 805.4315  | 403.2194 | 804.4475  | 402.7274 | 7  |
| 28 | 2917.3772 | 1459.1922 | 2900.3506 | 1450.6789 | 2899.3666 | 1450.1869 | P | 723.3896  | 362.1985 | 706.3631  | 353.6852 | 705.3791  | 353.1932 | 6  |
| 29 | 3046.4198 | 1523.7135 | 3029.3932 | 1515.2002 | 3028.4092 | 1514.7082 | E | 626.3369  | 313.6721 | 609.3103  | 305.1588 | 608.3263  | 304.6668 | 5  |
| 30 | 3183.4787 | 1592.2430 | 3166.4521 | 1583.7297 | 3165.4681 | 1583.2377 | H | 497.2943  | 249.1508 | 480.2677  | 240.6375 |           |          | 4  |
| 31 | 3240.5001 | 1620.7537 | 3223.4736 | 1612.2404 | 3222.4896 | 1611.7484 | G | 360.2354  | 180.6213 | 343.2088  | 172.1081 |           |          | 3  |
| 32 | 3396.6012 | 1698.8043 | 3379.5747 | 1690.2910 | 3378.5907 | 1689.7990 | R | 303.2139  | 152.1106 | 286.1874  | 143.5973 |           |          | 2  |
| 33 |           |           |           |           |           |           | K | 147.1128  | 74.0600  | 130.0863  | 65.5468  |           |          | 1  |

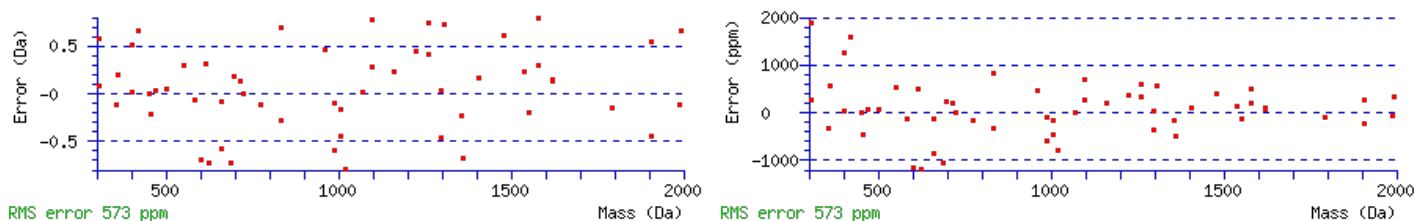

NCBI BLAST search of [SLGNVNFTVSAEALLESQELCGTEVPSVPEHGRK](#)

(Parameters: blastp, nr protein database, expect=20000, no filter, PAM30)

Other BLAST [web gateways](#)

All matches to this query

| Score | Mr(calc)  | Delta   | Sequence                                           | Site Analysis        |
|-------|-----------|---------|----------------------------------------------------|----------------------|
| 57.3  | 3541.6995 | 0.0151  | <a href="#">SLGNVNFTVSAEALLESQELCGTEVPSVPEHGRK</a> | Deamidated N6 53.54% |
| 56.3  | 3541.6995 | 0.0151  | <a href="#">SLGNVNFTVSAEALLESQELCGTEVPSVPEHGRK</a> | Deamidated N4 41.75% |
| 46.8  | 3541.6995 | 0.0151  | <a href="#">SLGNVNFTVSAEALLESQELCGTEVPSVPEHGRK</a> | Deamidated Q17 4.71% |
| 42.1  | 3540.7155 | 0.9991  | <a href="#">SLGNVNFTVSAEALLESQELCGTEVPSVPEHGRK</a> |                      |
| 9.0   | 3539.7202 | 1.9944  | <a href="#">NVGPIRSPALVSQNGGPIAMHDSEASEVFGTEKK</a> |                      |
| 8.0   | 3541.7246 | -0.0101 | <a href="#">CTTPSEDTLNWLASLTFKLT TDVSNQNTKQK</a>   |                      |
| 5.3   | 3541.7325 | -0.0180 | <a href="#">YLDNEPVTGTSHDGVROSEVSGPIELNTGPLDK</a>  |                      |
| 4.5   | 3539.6927 | 2.0218  | <a href="#">DPSSCMFFEPLLTISLNRTPFSLQYICR</a>       |                      |
| 4.3   | 3539.7202 | 1.9944  | <a href="#">NVGPIRSPALVSQNGGPIAMHDSEASEVFGTEKK</a> |                      |
| 4.3   | 3539.7202 | 1.9944  | <a href="#">NVGPIRSPALVSQNGGPIAMHDSEASEVFGTEKK</a> |                      |

Mascot: <http://www.matrixscience.com/>

# MASCOT SCIENCE Mascot Search Results

## Peptide View

MS/MS Fragmentation of **VSNQTLSLFFTVLQDVPVR**

Found in **P01023** in **con\_Xuniprot\_HUMAN3**, A2MG\_HUMAN Alpha-2-macroglobulin OS=Homo sapiens GN=A2M PE=1 SV=3

Match to Query 14444: 2163.163332 from(722.061720,3+) intensity(15234.0713) rtinseconds(2886) scans(7578) index(25735)

Title: 111019\_Est\_MI\_YS\_G\_07Spectrum6555\_scans\_7578

Data file C:\mascot\20140703\_Tmgf\_1D\CSV\_UseAnalysis\MasterCSV\All\_Glyco\mgf\ptm\UC18ERLIC\_PTM\_35D.mgf

Click mouse within plot area to zoom in by factor of two about that point

Or, to Da

Label all possible matches Label matches used for scoring

Show Y-axis

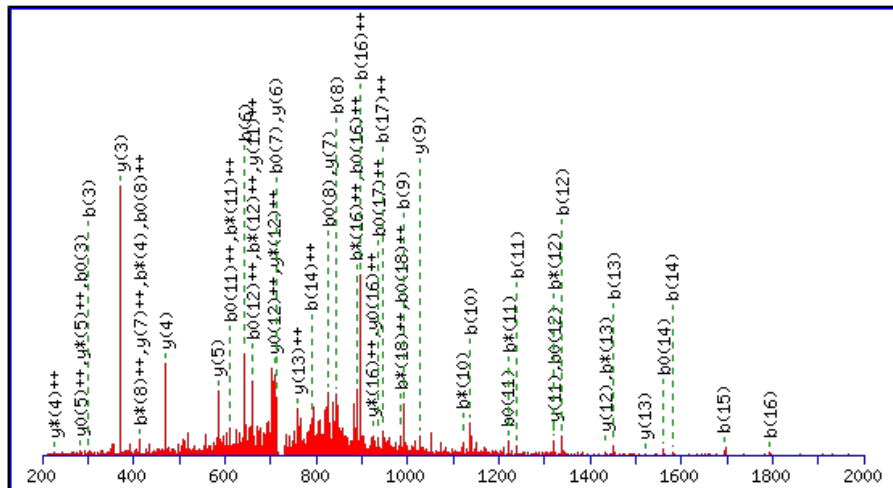

Monoisotopic mass of neutral peptide Mr(calc): 2163.1576

Fixed modifications: Carbamidomethyl (C) (apply to specified residues or termini only)

Variable modifications:

N3 : Deamidated (NQ)

Ions Score: 49 Expect: 0.002

Matches : 55/202 fragment ions using 84 most intense peaks (help)

| #  | b                | b <sup>++</sup> | b <sup>*</sup>   | b <sup>*++</sup> | b <sup>0</sup>   | b <sup>0++</sup> | Seq. | y                | y <sup>++</sup> | y <sup>*</sup> | y <sup>*++</sup> | y <sup>0</sup> | y <sup>0++</sup> | #  |
|----|------------------|-----------------|------------------|------------------|------------------|------------------|------|------------------|-----------------|----------------|------------------|----------------|------------------|----|
| 1  | 100.0757         | 50.5415         |                  |                  |                  |                  | V    |                  |                 |                |                  |                |                  | 19 |
| 2  | 187.1077         | 94.0575         |                  |                  | 169.0972         | 85.0522          | S    | 2065.0964        | 1033.0519       | 2048.0699      | 1024.5386        | 2047.0859      | 1024.0466        | 18 |
| 3  | <b>302.1347</b>  | 151.5710        | 285.1081         | 143.0577         | <b>284.1241</b>  | 142.5657         | N    | 1978.0644        | 989.5358        | 1961.0379      | 981.0226         | 1960.0538      | 980.5306         | 17 |
| 4  | 430.1932         | 215.6003        | <b>413.1667</b>  | 207.0870         | 412.1827         | 206.5950         | Q    | 1863.0375        | 932.0224        | 1846.0109      | <b>923.5091</b>  | 1845.0269      | <b>923.0171</b>  | 16 |
| 5  | 531.2409         | 266.1241        | 514.2144         | 257.6108         | 513.2304         | 257.1188         | T    | 1734.9789        | 867.9931        | 1717.9523      | 859.4798         | 1716.9683      | 858.9878         | 15 |
| 6  | <b>644.3250</b>  | 322.6661        | 627.2984         | 314.1529         | 626.3144         | 313.6608         | L    | 1633.9312        | 817.4692        | 1616.9047      | 808.9560         | 1615.9206      | 808.4640         | 14 |
| 7  | 731.3570         | 366.1821        | 714.3305         | 357.6689         | <b>713.3464</b>  | 357.1769         | S    | <b>1520.8471</b> | <b>760.9272</b> | 1503.8206      | 752.4139         | 1502.8366      | 751.9219         | 13 |
| 8  | <b>844.4411</b>  | 422.7242        | 827.4145         | <b>414.2109</b>  | <b>826.4305</b>  | <b>413.7189</b>  | L    | <b>1433.8151</b> | 717.4112        | 1416.7886      | <b>708.8979</b>  | 1415.8045      | <b>708.4059</b>  | 12 |
| 9  | <b>991.5095</b>  | 496.2584        | 974.4829         | 487.7451         | 973.4989         | 487.2531         | F    | <b>1320.7311</b> | <b>660.8692</b> | 1303.7045      | 652.3559         | 1302.7205      | 651.8639         | 11 |
| 10 | <b>1138.5779</b> | 569.7926        | <b>1121.5514</b> | 561.2793         | 1120.5673        | 560.7873         | F    | 1173.6626        | 587.3350        | 1156.6361      | 578.8217         | 1155.6521      | 578.3297         | 10 |
| 11 | <b>1239.6256</b> | 620.3164        | <b>1222.5990</b> | <b>611.8032</b>  | <b>1221.6150</b> | <b>611.3111</b>  | T    | <b>1026.5942</b> | 513.8007        | 1009.5677      | 505.2875         | 1008.5837      | 504.7955         | 9  |
| 12 | <b>1338.6940</b> | 669.8506        | <b>1321.6674</b> | <b>661.3374</b>  | <b>1320.6834</b> | <b>660.8454</b>  | V    | 925.5465         | 463.2769        | 908.5200       | 454.7636         | 907.5360       | 454.2716         | 8  |
| 13 | <b>1451.7781</b> | 726.3927        | <b>1434.7515</b> | 717.8794         | 1433.7675        | 717.3874         | L    | <b>826.4781</b>  | <b>413.7427</b> | 809.4516       | 405.2294         | 808.4676       | 404.7374         | 7  |
| 14 | <b>1579.8366</b> | <b>790.4220</b> | 1562.8101        | 781.9087         | <b>1561.8261</b> | 781.4167         | Q    | <b>713.3941</b>  | 357.2007        | 696.3675       | 348.6874         | 695.3835       | 348.1954         | 6  |
| 15 | <b>1694.8636</b> | 847.9354        | 1677.8370        | 839.4222         | 1676.8530        | 838.9301         | D    | <b>585.3355</b>  | 293.1714        | 568.3089       | <b>284.6581</b>  | 567.3249       | <b>284.1661</b>  | 5  |
| 16 | <b>1793.9320</b> | <b>897.4696</b> | 1776.9054        | <b>888.9564</b>  | 1775.9214        | <b>888.4644</b>  | V    | <b>470.3085</b>  | 235.6579        | 453.2820       | <b>227.1446</b>  |                |                  | 4  |
| 17 | 1890.9848        | <b>945.9960</b> | 1873.9582        | 937.4827         | 1872.9742        | <b>936.9907</b>  | P    | <b>371.2401</b>  | 186.1237        | 354.2136       | 177.6104         |                |                  | 3  |
| 18 | 1990.0532        | 995.5302        | 1973.0266        | <b>987.0169</b>  | 1972.0426        | <b>986.5249</b>  | V    | 274.1874         | 137.5973        | 257.1608       | 129.0840         |                |                  | 2  |
| 19 |                  |                 |                  |                  |                  |                  | R    | 175.1190         | 88.0631         | 158.0924       | 79.5498          |                |                  | 1  |

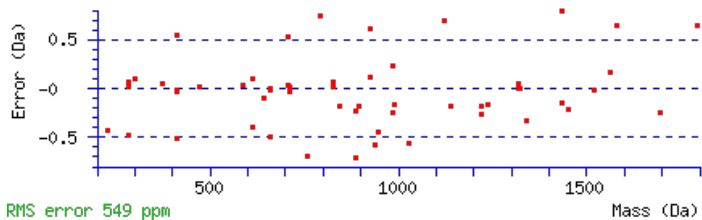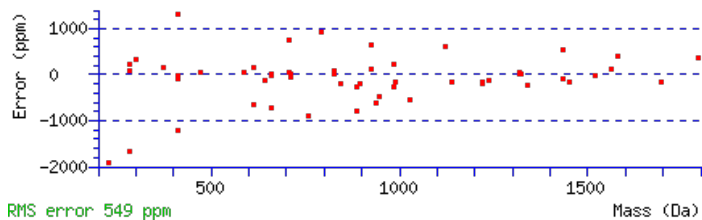

NCBI BLAST search of [VSNQTLSEFTVLQDVPVR](#)

(Parameters: blastp, nr protein database, expect=20000, no filter, PAM30)

Other BLAST [web gateways](#)

All matches to this query

| Score | Mr(calcd) | Delta   | Sequence                            | Site Analysis        |
|-------|-----------|---------|-------------------------------------|----------------------|
| 48.5  | 2163.1576 | 0.0057  | <a href="#">VSNQTLSEFTVLQDVPVR</a>  | Deamidated N3 70.55% |
| 44.7  | 2163.1576 | 0.0057  | <a href="#">VSNQTLSEFTVLQDVPVR</a>  | Deamidated Q4 29.41% |
| 15.6  | 2163.1576 | 0.0057  | <a href="#">VSNQTLSEFTVLQDVPVR</a>  | Deamidated Q14 0.04% |
| 4.2   | 2161.1486 | 2.0147  | <a href="#">QLQDILKLMDAVMLQLTR</a>  |                      |
| 3.2   | 2163.1688 | -0.0054 | <a href="#">QKLSQYFPDSVIVKNIR</a>   |                      |
| 1.9   | 2162.1517 | 1.0116  | <a href="#">ISRLLENITVLDAGLYGCR</a> |                      |
| 1.6   | 2163.1688 | -0.0054 | <a href="#">QKLSQYFPDSVIVKNIR</a>   |                      |
| 0.2   | 2163.1688 | -0.0054 | <a href="#">QKLSQYFPDSVIVKNIR</a>   |                      |
| 0.2   | 2163.1688 | -0.0054 | <a href="#">QKLSQYFPDSVIVKNIR</a>   |                      |

Mascot: <http://www.matrixscience.com/>

# MASCOT SCIENCE Mascot Search Results

## Peptide View

MS/MS Fragmentation of **TVLTPATNHMGNVTFIPANR**

Found in **M0R1Q1** in **con\_Xuniprot\_HUMAN3**, M0R1Q1\_HUMAN Complement C3 (Fragment) OS=Homo sapiens GN=C3 PE=2 SV=1

Match to Query 15114: 2255.143182 from(752.721670,3+) intensity(139443.0781) rtinseconds(1576) scans(3728) index(767)

Title: 111019\_Est\_ISCardio\_NMI\_YP\_G\_2Spectrum3218\_scans\_3728

Data file C:\mascot\20140703\_Tmgf\_1D\CSV\_UseAnalysis\MasterCSV\All\_Glyco\mgf\ptm\UC18ERLIC\_PTM\_35D.mgf

Click mouse within plot area to zoom in by factor of two about that point

Or,  to  Da

Label all possible matches  Label matches used for scoring

Show Y-axis

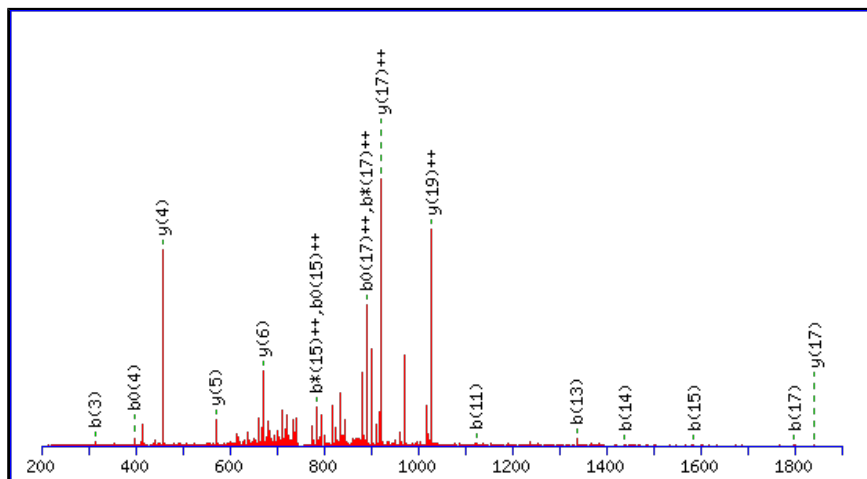

Monoisotopic mass of neutral peptide Mr(calc): 2255.1369

Fixed modifications: Carbamidomethyl (C) (apply to specified residues or termini only)

Variable modifications:

N12 : Deamidated (NQ)

Ions Score: 47 Expect: 0.0054

Matches : 17/216 fragment ions using 17 most intense peaks ([help](#))

| #  | b                | b <sup>++</sup> | b <sup>*</sup> | b <sup>*++</sup> | b <sup>0</sup>  | b <sup>0++</sup> | Seq. | y                | y <sup>++</sup>  | y <sup>*</sup> | y <sup>*++</sup> | y <sup>0</sup> | y <sup>0++</sup> | #  |
|----|------------------|-----------------|----------------|------------------|-----------------|------------------|------|------------------|------------------|----------------|------------------|----------------|------------------|----|
| 1  | 102.0550         | 51.5311         |                |                  | 84.0444         | 42.5258          | T    |                  |                  |                |                  |                |                  | 21 |
| 2  | 201.1234         | 101.0653        |                |                  | 183.1128        | 92.0600          | V    | 2155.0965        | 1078.0519        | 2138.0699      | 1069.5386        | 2137.0859      | 1069.0466        | 20 |
| 3  | <b>314.2074</b>  | 157.6074        |                |                  | 296.1969        | 148.6021         | L    | 2056.0280        | <b>1028.5177</b> | 2039.0015      | 1020.0044        | 2038.0175      | 1019.5124        | 19 |
| 4  | 415.2551         | 208.1312        |                |                  | <b>397.2445</b> | 199.1259         | T    | 1942.9440        | 971.9756         | 1925.9174      | 963.4624         | 1924.9334      | 962.9703         | 18 |
| 5  | 512.3079         | 256.6576        |                |                  | 494.2973        | 247.6523         | P    | <b>1841.8963</b> | <b>921.4518</b>  | 1824.8697      | 912.9385         | 1823.8857      | 912.4465         | 17 |
| 6  | 583.3450         | 292.1761        |                |                  | 565.3344        | 283.1709         | A    | 1744.8435        | 872.9254         | 1727.8170      | 864.4121         | 1726.8330      | 863.9201         | 16 |
| 7  | 684.3927         | 342.7000        |                |                  | 666.3821        | 333.6947         | T    | 1673.8064        | 837.4068         | 1656.7799      | 828.8936         | 1655.7959      | 828.4016         | 15 |
| 8  | 798.4356         | 399.7214        | 781.4090       | 391.2082         | 780.4250        | 390.7162         | N    | 1572.7587        | 786.8830         | 1555.7322      | 778.3697         | 1554.7482      | 777.8777         | 14 |
| 9  | 935.4945         | 468.2509        | 918.4680       | 459.7376         | 917.4839        | 459.2456         | H    | 1458.7158        | 729.8615         | 1441.6893      | 721.3483         | 1440.7052      | 720.8563         | 13 |
| 10 | 1066.5350        | 533.7711        | 1049.5084      | 525.2579         | 1048.5244       | 524.7659         | M    | 1321.6569        | 661.3321         | 1304.6304      | 652.8188         | 1303.6463      | 652.3268         | 12 |
| 11 | <b>1123.5565</b> | 562.2819        | 1106.5299      | 553.7686         | 1105.5459       | 553.2766         | G    | 1190.6164        | 595.8118         | 1173.5899      | 587.2986         | 1172.6058      | 586.8066         | 11 |
| 12 | 1238.5834        | 619.7953        | 1221.5569      | 611.2821         | 1220.5728       | 610.7901         | N    | 1133.5950        | 567.3011         | 1116.5684      | 558.7878         | 1115.5844      | 558.2958         | 10 |
| 13 | <b>1337.6518</b> | 669.3295        | 1320.6253      | 660.8163         | 1319.6412       | 660.3243         | V    | 1018.5680        | 509.7876         | 1001.5415      | 501.2744         | 1000.5574      | 500.7824         | 9  |
| 14 | <b>1438.6995</b> | 719.8534        | 1421.6729      | 711.3401         | 1420.6889       | 710.8481         | T    | 919.4996         | 460.2534         | 902.4730       | 451.7402         | 901.4890       | 451.2482         | 8  |
| 15 | <b>1585.7679</b> | 793.3876        | 1568.7414      | <b>784.8743</b>  | 1567.7573       | <b>784.3823</b>  | F    | 818.4519         | 409.7296         | 801.4254       | 401.2163         | 800.4413       | 400.7243         | 7  |
| 16 | 1686.8156        | 843.9114        | 1669.7890      | 835.3982         | 1668.8050       | 834.9061         | T    | <b>671.3835</b>  | 336.1954         | 654.3570       | 327.6821         | 653.3729       | 327.1901         | 6  |
| 17 | <b>1799.8997</b> | 900.4535        | 1782.8731      | <b>891.9402</b>  | 1781.8891       | <b>891.4482</b>  | I    | <b>570.3358</b>  | 285.6715         | 553.3093       | 277.1583         |                |                  | 5  |
| 18 | 1896.9524        | 948.9798        | 1879.9259      | 940.4666         | 1878.9418       | 939.9746         | P    | <b>457.2518</b>  | 229.1295         | 440.2252       | 220.6162         |                |                  | 4  |
| 19 | 1967.9895        | 984.4984        | 1950.9630      | 975.9851         | 1949.9790       | 975.4931         | A    | 360.1990         | 180.6031         | 343.1724       | 172.0899         |                |                  | 3  |
| 20 | 2082.0325        | 1041.5199       | 2065.0059      | 1033.0066        | 2064.0219       | 1032.5146        | N    | 289.1619         | 145.0846         | 272.1353       | 136.5713         |                |                  | 2  |
| 21 |                  |                 |                |                  |                 |                  | R    | 175.1190         | 88.0631          | 158.0924       | 79.5498          |                |                  | 1  |

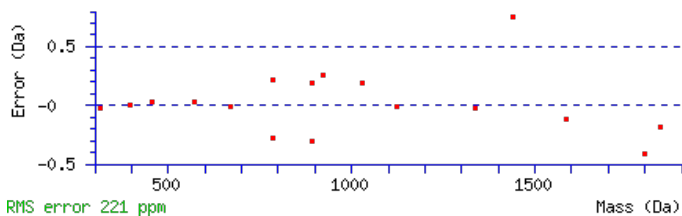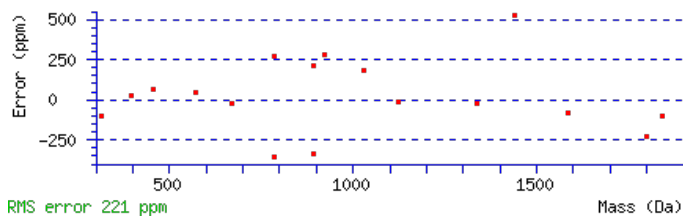

NCBI BLAST search of [TVLTPATNHMGNVTFIPANR](#)  
 (Parameters: blastp, nr protein database, expect=20000, no filter, PAM30)  
 Other BLAST [web gateways](#)

**All matches to this query**

| Score | Mr(calc)  | Delta  | Sequence                              | Site Analysis         |
|-------|-----------|--------|---------------------------------------|-----------------------|
| 46.8  | 2255.1369 | 0.0063 | <a href="#">TVLTPATNHMGNVTFIPANR</a>  | Deamidated N12 90.87% |
| 36.6  | 2255.1369 | 0.0063 | <a href="#">TVLTPATNHMGNVTFIPANR</a>  | Deamidated N8 8.72%   |
| 23.4  | 2255.1369 | 0.0063 | <a href="#">TVLTPATNHMGNVTFIPANR</a>  | Deamidated N20 0.41%  |
| 13.2  | 2254.1337 | 1.0095 | <a href="#">SAGAGIRFLGEEKMGTELLLM</a> |                       |
| 10.0  | 2255.1369 | 0.0063 | <a href="#">HTFALLDAARGTGECVVVDPK</a> |                       |
| 7.6   | 2254.1382 | 1.0050 | <a href="#">WQVGAKFLAYATLANGSQSNK</a> |                       |
| 6.1   | 2253.1311 | 2.0121 | <a href="#">LVPSCEEERLLVASGADPSPK</a> |                       |
| 6.0   | 2254.1382 | 1.0050 | <a href="#">WQVGAKFLAYATLANGSQSNK</a> |                       |
| 5.5   | 2254.1382 | 1.0050 | <a href="#">WQVGAKFLAYATLANGSQSNK</a> |                       |
| 5.5   | 2254.1382 | 1.0050 | <a href="#">WQVGAKFLAYATLANGSQSNK</a> |                       |

Mascot: <http://www.matrixscience.com/>

# MATRIX SCIENCE Mascot Search Results

## Peptide View

MS/MS Fragmentation of **ITYSIVQTNSCK**

Found in **P01042** in **con\_Xuniprot\_HUMAN3**, KNG1\_HUMAN Kininogen-1 OS=Homo sapiens GN=KNG1 PE=1 SV=2

Match to Query 2840: 1413.687948 from(707.851250,2+) intensity(10775.5273) rtinseconds(681) scans(1329) index(28021)

Title: 111019\_Est\_MI\_YS\_G\_12Spectrum1123\_scans\_\_1329

Data file C:\\mascot\\20140703\_Tmgf\_1D\\CSV\_UseAnalysis\\MasterCSV\\All\_Glyco\\mgf\\ptm\\UC18ERLIC\_PTM\_35D.mgf

Click mouse within plot area to zoom in by factor of two about that point

Or, to Da

Label all possible matches Label matches used for scoring

Show Y-axis

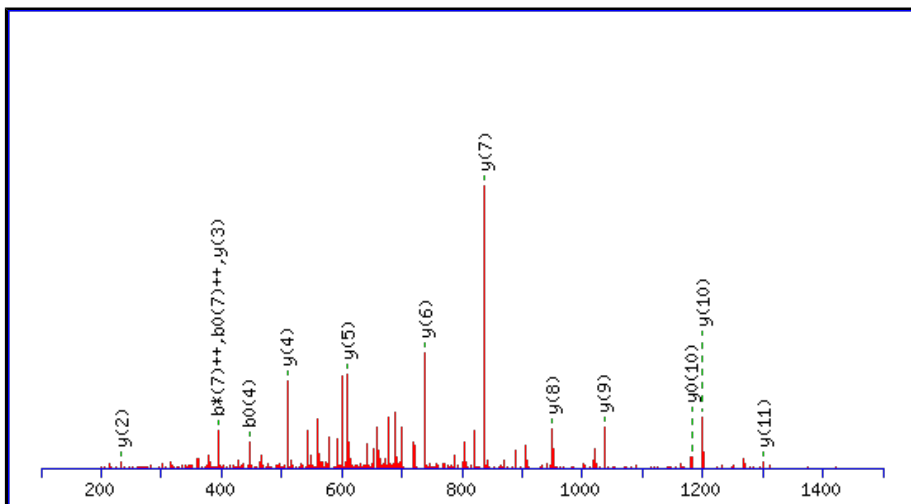

Monoisotopic mass of neutral peptide **Mr(calc):** 1413.6810

Fixed modifications: Carbamidomethyl (C) (apply to specified residues or termini only)

Variable modifications:

N9 : Deamidated (NQ)

Ions Score: 105 Expect: 4.8e-009

Matches : 14/116 fragment ions using 12 most intense peaks ([help](#))

| #  | b         | b <sup>++</sup> | b <sup>*</sup> | b <sup>*++</sup> | b <sup>0</sup> | b <sup>0++</sup> | Seq. | y         | y <sup>++</sup> | y <sup>*</sup> | y <sup>*++</sup> | y <sup>0</sup> | y <sup>0++</sup> | #  |
|----|-----------|-----------------|----------------|------------------|----------------|------------------|------|-----------|-----------------|----------------|------------------|----------------|------------------|----|
| 1  | 114.0913  | 57.5493         |                |                  |                |                  | I    |           |                 |                |                  |                |                  | 12 |
| 2  | 215.1390  | 108.0731        |                |                  | 197.1285       | 99.0679          | T    | 1301.6042 | 651.3057        | 1284.5776      | 642.7925         | 1283.5936      | 642.3005         | 11 |
| 3  | 378.2023  | 189.6048        |                |                  | 360.1918       | 180.5995         | Y    | 1200.5565 | 600.7819        | 1183.5300      | 592.2686         | 1182.5460      | 591.7766         | 10 |
| 4  | 465.2344  | 233.1208        |                |                  | 447.2238       | 224.1155         | S    | 1037.4932 | 519.2502        | 1020.4666      | 510.7370         | 1019.4826      | 510.2449         | 9  |
| 5  | 578.3184  | 289.6629        |                |                  | 560.3079       | 280.6576         | I    | 950.4612  | 475.7342        | 933.4346       | 467.2209         | 932.4506       | 466.7289         | 8  |
| 6  | 677.3869  | 339.1971        |                |                  | 659.3763       | 330.1918         | V    | 837.3771  | 419.1922        | 820.3505       | 410.6789         | 819.3665       | 410.1869         | 7  |
| 7  | 805.4454  | 403.2264        | 788.4189       | 394.7131         | 787.4349       | 394.2211         | Q    | 738.3087  | 369.6580        | 721.2821       | 361.1447         | 720.2981       | 360.6527         | 6  |
| 8  | 906.4931  | 453.7502        | 889.4666       | 445.2369         | 888.4825       | 444.7449         | T    | 610.2501  | 305.6287        | 593.2236       | 297.1154         | 592.2395       | 296.6234         | 5  |
| 9  | 1021.5201 | 511.2637        | 1004.4935      | 502.7504         | 1003.5095      | 502.2584         | N    | 509.2024  | 255.1048        | 492.1759       | 246.5916         | 491.1919       | 246.0996         | 4  |
| 10 | 1181.5507 | 591.2790        | 1164.5242      | 582.7657         | 1163.5401      | 582.2737         | C    | 394.1755  | 197.5914        | 377.1489       | 189.0781         | 376.1649       | 188.5861         | 3  |
| 11 | 1268.5827 | 634.7950        | 1251.5562      | 626.2817         | 1250.5722      | 625.7897         | S    | 234.1448  | 117.5761        | 217.1183       | 109.0628         | 216.1343       | 108.5708         | 2  |
| 12 |           |                 |                |                  |                |                  | K    | 147.1128  | 74.0600         | 130.0863       | 65.5468          |                |                  | 1  |

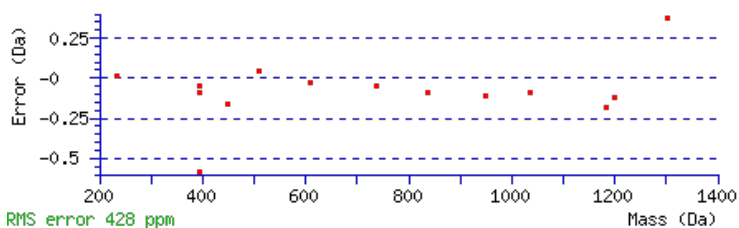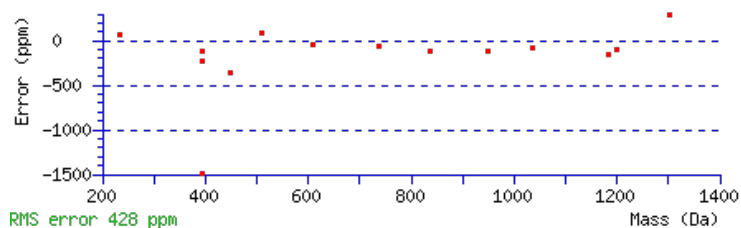

NCBI **BLAST** search of [ITYSIVQTNC SK](#)

(Parameters: blastp, nr protein database, expect=20000, no filter, PAM30)

Other BLAST [web gateways](#)

**All matches to this query**

| Score | Mr(calc)  | Delta   | Sequence                      | Site Analysis        |
|-------|-----------|---------|-------------------------------|----------------------|
| 105.5 | 1413.6810 | 0.0070  | <a href="#">ITYSIVQTNC SK</a> | Deamidated N9 99.99% |
| 67.0  | 1413.6810 | 0.0070  | <a href="#">ITYSIVQTNC SK</a> | Deamidated Q7 0.01%  |
| 7.2   | 1413.6810 | 0.0070  | <a href="#">TMSQEFSKLQSK</a>  |                      |
| 2.1   | 1413.6843 | 0.0036  | <a href="#">ATSSLMMLDSKSK</a> |                      |
| 2.0   | 1412.6877 | 1.0002  | <a href="#">RHQCRVLCQR</a>    |                      |
| 1.6   | 1413.6922 | -0.0043 | <a href="#">NHSAPVLTNMSK</a>  |                      |
| 0.7   | 1413.6888 | -0.0009 | <a href="#">LHDVLEEQFER</a>   |                      |

Mascot: <http://www.matrixscience.com/>



# MATRIX SCIENCE Mascot Search Results

## Peptide View

MS/MS Fragmentation of **LNAENNATFYFK**

Found in **P01042** in **con\_Xuniprot\_HUMAN3**, KNG1\_HUMAN Kininogen-1 OS=Homo sapiens GN=KNG1 PE=1 SV=2

Match to Query 3867: 1431.672548 from(716.843550,2+) intensity(154903.0469) rtinseconds(1468) scans(3721) index(18534)

Title: 111019\_Est\_MI\_YP\_G\_08Spectrum3237\_scans\_\_3721

Data file C:\\mascot\\20140703\_Tmgf\_1D\\CSV\_UseAnalysis\\MasterCSV\\All\_Glyco\\mgf\\ptm\\UC18ERLIC\_PTM\_35D.mgf

Click mouse within plot area to zoom in by factor of two about that point

Or, to Da

Label all possible matches Label matches used for scoring

Show Y-axis

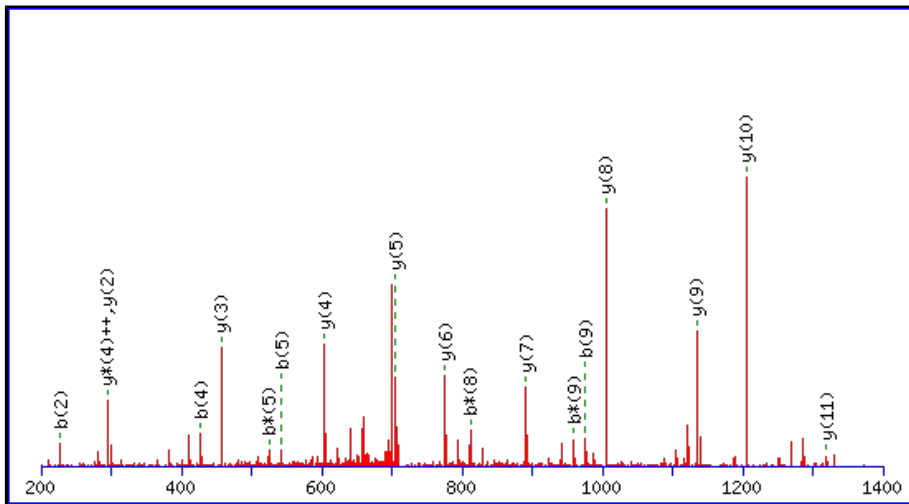

Monoisotopic mass of neutral peptide Mr(calc): 1431.6670

Fixed modifications: Carbamidomethyl (C) (apply to specified residues or termini only)

Variable modifications:

N6 : Deamidated (NQ)

Ions Score: 89 Expect: 2.2e-007

Matches : 18/116 fragment ions using 24 most intense peaks ([help](#))

| #  | b               | b <sup>++</sup> | b*              | b <sup>+++</sup> | b <sup>0</sup> | b <sup>0++</sup> | Seq. | y                | y <sup>++</sup> | y*        | y <sup>+++</sup> | y <sup>0</sup> | y <sup>0++</sup> | #  |
|----|-----------------|-----------------|-----------------|------------------|----------------|------------------|------|------------------|-----------------|-----------|------------------|----------------|------------------|----|
| 1  | 114.0913        | 57.5493         |                 |                  |                |                  | L    |                  |                 |           |                  |                |                  | 12 |
| 2  | <b>228.1343</b> | 114.5708        | 211.1077        | 106.0575         |                |                  | N    | <b>1319.5903</b> | 660.2988        | 1302.5637 | 651.7855         | 1301.5797      | 651.2935         | 11 |
| 3  | 299.1714        | 150.0893        | 282.1448        | 141.5761         |                |                  | A    | <b>1205.5473</b> | 603.2773        | 1188.5208 | 594.7640         | 1187.5368      | 594.2720         | 10 |
| 4  | <b>428.2140</b> | 214.6106        | 411.1874        | 206.0974         | 410.2034       | 205.6053         | E    | <b>1134.5102</b> | 567.7587        | 1117.4837 | 559.2455         | 1116.4997      | 558.7535         | 9  |
| 5  | <b>542.2569</b> | 271.6321        | <b>525.2304</b> | 263.1188         | 524.2463       | 262.6268         | N    | <b>1005.4676</b> | 503.2375        | 988.4411  | 494.7242         | 987.4571       | 494.2322         | 8  |
| 6  | 657.2838        | 329.1456        | 640.2573        | 320.6323         | 639.2733       | 320.1403         | N    | <b>891.4247</b>  | 446.2160        | 874.3981  | 437.7027         | 873.4141       | 437.2107         | 7  |
| 7  | 728.3210        | 364.6641        | 711.2944        | 356.1508         | 710.3104       | 355.6588         | A    | <b>776.3978</b>  | 388.7025        | 759.3712  | 380.1892         | 758.3872       | 379.6972         | 6  |
| 8  | 829.3686        | 415.1880        | <b>812.3421</b> | 406.6747         | 811.3581       | 406.1827         | T    | <b>705.3606</b>  | 353.1840        | 688.3341  | 344.6707         | 687.3501       | 344.1787         | 5  |
| 9  | <b>976.4371</b> | 488.7222        | <b>959.4105</b> | 480.2089         | 958.4265       | 479.7169         | F    | <b>604.3130</b>  | 302.6601        | 587.2864  | <b>294.1468</b>  |                |                  | 4  |
| 10 | 1139.5004       | 570.2538        | 1122.4738       | 561.7406         | 1121.4898      | 561.2485         | Y    | <b>457.2445</b>  | 229.1259        | 440.2180  | 220.6126         |                |                  | 3  |
| 11 | 1286.5688       | 643.7880        | 1269.5422       | 635.2748         | 1268.5582      | 634.7828         | F    | <b>294.1812</b>  | 147.5942        | 277.1547  | 139.0810         |                |                  | 2  |
| 12 |                 |                 |                 |                  |                |                  | K    | 147.1128         | 74.0600         | 130.0863  | 65.5468          |                |                  | 1  |

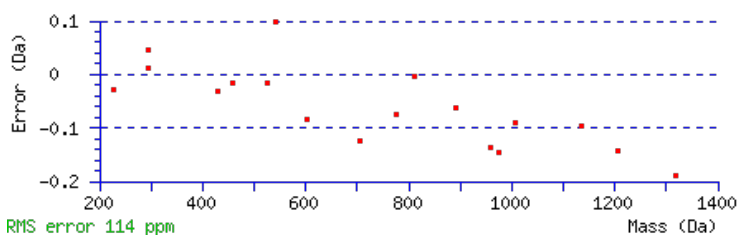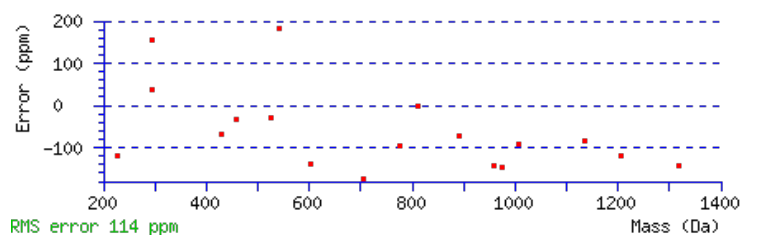

NCBI **BLAST** search of [LNAENNATFYFK](#)

(Parameters: blastp, nr protein database, expect=20000, no filter, PAM30)

Other BLAST [web gateways](#)

**All matches to this query**

| Score | Mr(calc)  | Delta   | Sequence                           | Site Analysis        |
|-------|-----------|---------|------------------------------------|----------------------|
| 88.5  | 1431.6670 | 0.0055  | <a href="#">LNAENNATFYFK</a>       | Deamidated N6 98.67% |
| 69.8  | 1431.6670 | 0.0055  | <a href="#">LNAENNATFYFK</a>       | Deamidated N5 1.33%  |
| 20.6  | 1431.6670 | 0.0055  | <a href="#">LNAENNATFYFK</a>       | Deamidated N2 0.00%  |
| 7.6   | 1431.6729 | -0.0003 | <a href="#">LLNNEQELOS NK</a>      |                      |
| 4.8   | 1431.6670 | 0.0055  | <a href="#">NGHFFPEQVLNK</a>       |                      |
| 4.5   | 1431.6776 | -0.0051 | <a href="#">GGGGGNGKAAATAAVAAM</a> |                      |
| 4.4   | 1431.6729 | -0.0003 | <a href="#">LLNNEQELOS NK</a>      |                      |
| 4.0   | 1430.6751 | 0.9974  | <a href="#">MNTEKQLOYFK</a>        |                      |
| 3.4   | 1431.6776 | -0.0051 | <a href="#">GRTQCVPTGEQAK</a>      |                      |
| 2.5   | 1431.6729 | -0.0003 | <a href="#">LLNNEQELOS NK</a>      |                      |

Mascot: <http://www.matrixscience.com/>

# MASCOT SCIENCE Mascot Search Results

## Peptide View

MS/MS Fragmentation of **YNSQNSNNQFVLYR**

Found in **P01042** in **con\_Xuniprot\_HUMAN3**, KNG1\_HUMAN Kininogen-1 OS=Homo sapiens GN=KNG1 PE=1 SV=2

Match to Query 11041: 1874.862128 from(938.438340,2+) intensity(7939.4526) rtinseconds(1032) scans(2209) index(28072)

Title: 111019\_Est\_MI\_YS\_G\_12Spectrum1910\_scans\_\_2209

Data file C:\\mascot\\20140703\_Tmgf\_1D\\CSV\_UseAnalysis\\MasterCSV\\All\_Glyco\\mgf\\ptm\\UC18ERLIC\_PTM\_35D.mgf

Click mouse within plot area to zoom in by factor of two about that point

Or, to Da

Label all possible matches Label matches used for scoring

Show Y-axis

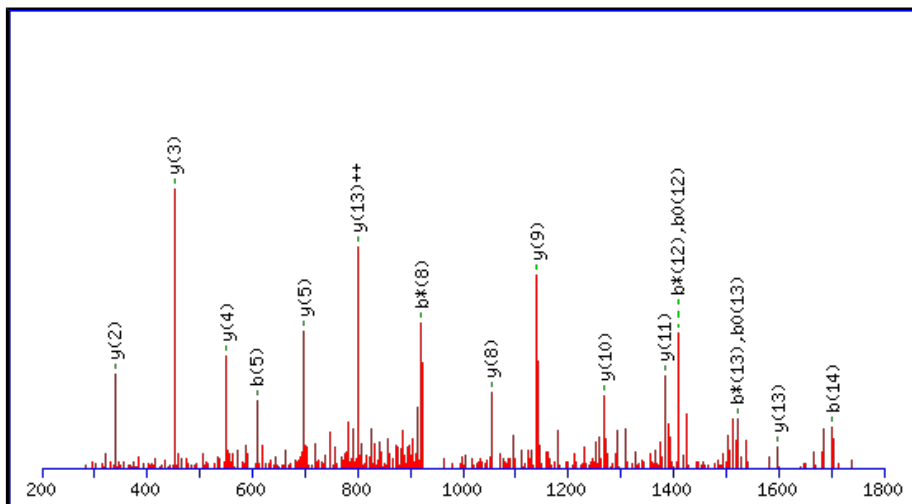

Monoisotopic mass of neutral peptide Mr(calc): 1874.8547

Fixed modifications: Carbamidomethyl (C) (apply to specified residues or termini only)

Variable modifications:

N5 : Deamidated (NQ)

Ions Score: 84 Expect: 6e-007

Matches : 17/146 fragment ions using 15 most intense peaks ([help](#))

| #  | b                | b <sup>++</sup> | b <sup>*</sup>   | b <sup>*++</sup> | b <sup>0</sup>   | b <sup>0++</sup> | Seq. | y                | y <sup>++</sup> | y <sup>*</sup> | y <sup>*++</sup> | y <sup>0</sup> | y <sup>0++</sup> | #  |
|----|------------------|-----------------|------------------|------------------|------------------|------------------|------|------------------|-----------------|----------------|------------------|----------------|------------------|----|
| 1  | 164.0706         | 82.5389         |                  |                  |                  |                  | Y    |                  |                 |                |                  |                |                  | 15 |
| 2  | 278.1135         | 139.5604        | 261.0870         | 131.0471         |                  |                  | N    | 1712.7987        | 856.9030        | 1695.7721      | 848.3897         | 1694.7881      | 847.8977         | 14 |
| 3  | 365.1456         | 183.0764        | 348.1190         | 174.5631         | 347.1350         | 174.0711         | S    | <b>1598.7558</b> | <b>799.8815</b> | 1581.7292      | 791.3682         | 1580.7452      | 790.8762         | 13 |
| 4  | 493.2041         | 247.1057        | 476.1776         | 238.5924         | 475.1936         | 238.1004         | Q    | 1511.7237        | 756.3655        | 1494.6972      | 747.8522         | 1493.7132      | 747.3602         | 12 |
| 5  | <b>608.2311</b>  | 304.6192        | 591.2045         | 296.1059         | 590.2205         | 295.6139         | N    | <b>1383.6652</b> | 692.3362        | 1366.6386      | 683.8229         | 1365.6546      | 683.3309         | 11 |
| 6  | 736.2897         | 368.6485        | 719.2631         | 360.1352         | 718.2791         | 359.6432         | Q    | <b>1268.6382</b> | 634.8227        | 1251.6117      | 626.3095         | 1250.6276      | 625.8175         | 10 |
| 7  | 823.3217         | 412.1645        | 806.2951         | 403.6512         | 805.3111         | 403.1592         | S    | <b>1140.5796</b> | 570.7935        | 1123.5531      | 562.2802         | 1122.5691      | 561.7882         | 9  |
| 8  | 937.3646         | 469.1859        | <b>920.3381</b>  | 460.6727         | 919.3540         | 460.1807         | N    | <b>1053.5476</b> | 527.2774        | 1036.5211      | 518.7642         |                |                  | 8  |
| 9  | 1051.4075        | 526.2074        | 1034.3810        | 517.6941         | 1033.3970        | 517.2021         | N    | 939.5047         | 470.2560        | 922.4781       | 461.7427         |                |                  | 7  |
| 10 | 1179.4661        | 590.2367        | 1162.4396        | 581.7234         | 1161.4556        | 581.2314         | Q    | 825.4618         | 413.2345        | 808.4352       | 404.7212         |                |                  | 6  |
| 11 | 1326.5345        | 663.7709        | 1309.5080        | 655.2576         | 1308.5240        | 654.7656         | F    | <b>697.4032</b>  | 349.2052        | 680.3766       | 340.6920         |                |                  | 5  |
| 12 | 1425.6029        | 713.3051        | <b>1408.5764</b> | 704.7918         | <b>1407.5924</b> | 704.2998         | V    | <b>550.3348</b>  | 275.6710        | 533.3082       | 267.1577         |                |                  | 4  |
| 13 | 1538.6870        | 769.8471        | <b>1521.6605</b> | 761.3339         | <b>1520.6764</b> | 760.8419         | L    | <b>451.2663</b>  | 226.1368        | 434.2398       | 217.6235         |                |                  | 3  |
| 14 | <b>1701.7503</b> | 851.3788        | 1684.7238        | 842.8655         | 1683.7398        | 842.3735         | Y    | <b>338.1823</b>  | 169.5948        | 321.1557       | 161.0815         |                |                  | 2  |
| 15 |                  |                 |                  |                  |                  |                  | R    | 175.1190         | 88.0631         | 158.0924       | 79.5498          |                |                  | 1  |

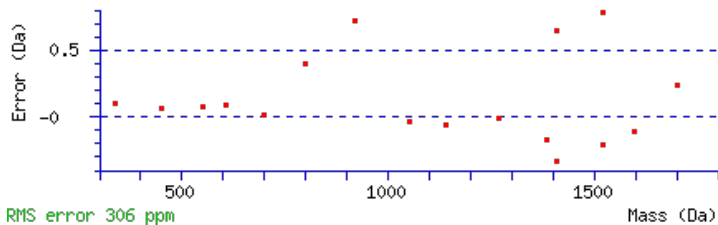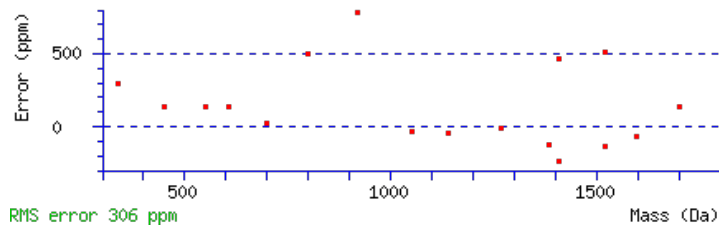

NCBI **BLAST** search of [YNSQNQSNNQFVLYR](#)

(Parameters: blastp, nr protein database, expect=20000, no filter, PAM30)

Other BLAST [web gateways](#)

**All matches to this query**

| Score | Mr(calc)  | Delta  | Sequence                         | Site Analysis        |
|-------|-----------|--------|----------------------------------|----------------------|
| 84.1  | 1874.8547 | 0.0074 | <a href="#">YNSQNQSNNQFVLYR</a>  | Deamidated N5 96.88% |
| 66.9  | 1874.8547 | 0.0074 | <a href="#">YNSQNQSNNQFVLYR</a>  | Deamidated Q4 1.87%  |
| 61.2  | 1874.8547 | 0.0074 | <a href="#">YNSQNQSNNQFVLYR</a>  | Deamidated Q6 0.50%  |
| 60.9  | 1874.8547 | 0.0074 | <a href="#">YNSQNQSNNQFVLYR</a>  | Deamidated N8 0.46%  |
| 57.9  | 1874.8547 | 0.0074 | <a href="#">YNSQNQSNNQFVLYR</a>  | Deamidated N9 0.23%  |
| 51.2  | 1874.8547 | 0.0074 | <a href="#">YNSQNQSNNQFVLYR</a>  | Deamidated N2 0.05%  |
| 46.0  | 1874.8547 | 0.0074 | <a href="#">YNSQNQSNNQFVLYR</a>  | Deamidated Q10 0.02% |
| 4.5   | 1874.8590 | 0.0032 | <a href="#">QILNEMWLHSCICR</a>   |                      |
| 2.3   | 1872.8617 | 2.0004 | <a href="#">QQWQWIDGAMYLYR</a>   |                      |
| 1.8   | 1873.8629 | 0.9993 | <a href="#">FERGLSSFQQSVAMDR</a> |                      |

Mascot: <http://www.matrixscience.com/>

# MASCOT SCIENCE Mascot Search Results

## Peptide View

MS/MS Fragmentation of **HGIQYFNNNTQHSSLFMLNEVKR**

Found in **P01042** in **con\_Xuniprot\_HUMAN3**, KNG1\_HUMAN Kininogen-1 OS=Homo sapiens GN=KNG1 PE=1 SV=2

Match to Query 25474: 2777.342256 from(695.342840,4+) intensity(53934.9023) rtinseconds(1376) scans(3250) index(8300)

Title: 111019\_Est\_ISCardio\_NMI\_YS\_G\_3Spectrum2759\_scans\_\_3250

Data file C:\mascot\20140703\_Tmgf\_1D\CSV\_UseAnalysis\MasterCSV\All\_Glyco\mgf\ptm\UC18ERLIC\_PTM\_35D.mgf

Click mouse within plot area to zoom in by factor of two about that point

Or, to Da

Label all possible matches Label matches used for scoring

Show Y-axis

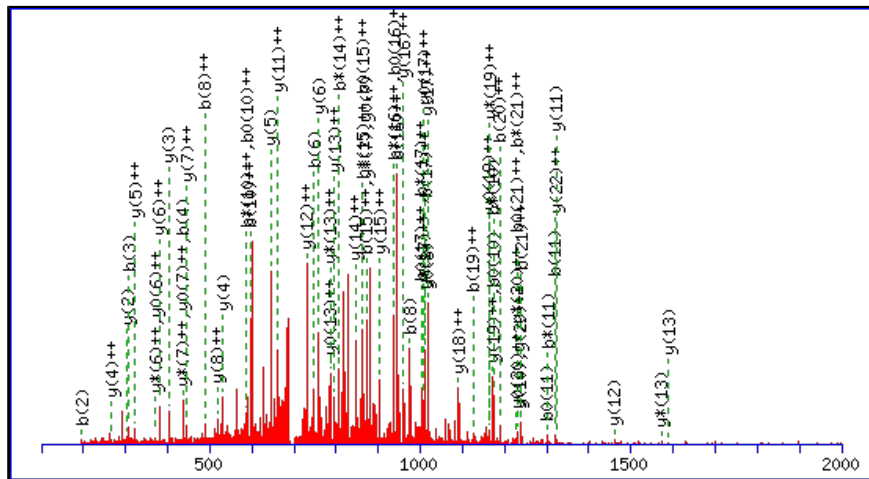

Monoisotopic mass of neutral peptide Mr(calc): 2777.3344

Fixed modifications: Carbamidomethyl (C) (apply to specified residues or termini only)

Variable modifications:

N8 : Deamidated (NQ)

Ions Score: 72 Expect: 1.6e-005

Matches : 70/234 fragment ions using 128 most intense peaks ([help](#))

| #  | b         | b <sup>++</sup> | b <sup>*</sup> | b <sup>*++</sup> | b <sup>0</sup> | b <sup>0++</sup> | Seq. | y         | y <sup>++</sup> | y <sup>*</sup> | y <sup>*++</sup> | y <sup>0</sup> | y <sup>0++</sup> | #  |
|----|-----------|-----------------|----------------|------------------|----------------|------------------|------|-----------|-----------------|----------------|------------------|----------------|------------------|----|
| 1  | 138.0662  | 69.5367         |                |                  |                |                  | H    |           |                 |                |                  |                |                  | 23 |
| 2  | 195.0877  | 98.0475         |                |                  |                |                  | G    | 2641.2827 | 1321.1450       | 2624.2562      | 1312.6317        | 2623.2722      | 1312.1397        | 22 |
| 3  | 308.1717  | 154.5895        |                |                  |                |                  | I    | 2584.2613 | 1292.6343       | 2567.2347      | 1284.1210        | 2566.2507      | 1283.6290        | 21 |
| 4  | 436.2303  | 218.6188        | 419.2037       | 210.1055         |                |                  | Q    | 2471.1772 | 1236.0922       | 2454.1507      | 1227.5790        | 2453.1667      | 1227.0870        | 20 |
| 5  | 599.2936  | 300.1504        | 582.2671       | 291.6372         |                |                  | Y    | 2343.1186 | 1172.0630       | 2326.0921      | 1163.5497        | 2325.1081      | 1163.0577        | 19 |
| 6  | 746.3620  | 373.6847        | 729.3355       | 365.1714         |                |                  | F    | 2180.0553 | 1090.5313       | 2163.0288      | 1082.0180        | 2162.0447      | 1081.5260        | 18 |
| 7  | 860.4050  | 430.7061        | 843.3784       | 422.1928         |                |                  | N    | 2032.9869 | 1016.9971       | 2015.9603      | 1008.4838        | 2014.9763      | 1007.9918        | 17 |
| 8  | 975.4319  | 488.2196        | 958.4054       | 479.7063         |                |                  | N    | 1918.9440 | 959.9756        | 1901.9174      | 951.4623         | 1900.9334      | 950.9703         | 16 |
| 9  | 1089.4748 | 545.2411        | 1072.4483      | 536.7278         |                |                  | N    | 1803.9170 | 902.4622        | 1786.8905      | 893.9489         | 1785.9065      | 893.4569         | 15 |
| 10 | 1190.5225 | 595.7649        | 1173.4960      | 587.2516         | 1172.5119      | 586.7596         | T    | 1689.8741 | 845.4407        | 1672.8476      | 836.9274         | 1671.8635      | 836.4354         | 14 |
| 11 | 1318.5811 | 659.7942        | 1301.5545      | 651.2809         | 1300.5705      | 650.7889         | Q    | 1588.8264 | 794.9168        | 1571.7999      | 786.4036         | 1570.8159      | 785.9116         | 13 |
| 12 | 1455.6400 | 728.3236        | 1438.6135      | 719.8104         | 1437.6294      | 719.3184         | H    | 1460.7678 | 730.8876        | 1443.7413      | 722.3743         | 1442.7573      | 721.8823         | 12 |
| 13 | 1542.6720 | 771.8397        | 1525.6455      | 763.3264         | 1524.6615      | 762.8344         | S    | 1323.7089 | 662.3581        | 1306.6824      | 653.8448         | 1305.6984      | 653.3528         | 11 |
| 14 | 1629.7041 | 815.3557        | 1612.6775      | 806.8424         | 1611.6935      | 806.3504         | S    | 1236.6769 | 618.8421        | 1219.6504      | 610.3288         | 1218.6663      | 609.8368         | 10 |
| 15 | 1742.7881 | 871.8977        | 1725.7616      | 863.3844         | 1724.7776      | 862.8924         | L    | 1149.6449 | 575.3261        | 1132.6183      | 566.8128         | 1131.6343      | 566.3208         | 9  |
| 16 | 1889.8565 | 945.4319        | 1872.8300      | 936.9186         | 1871.8460      | 936.4266         | F    | 1036.5608 | 518.7840        | 1019.5343      | 510.2708         | 1018.5502      | 509.7788         | 8  |
| 17 | 2020.8970 | 1010.9521       | 2003.8705      | 1002.4389        | 2002.8865      | 1001.9469        | M    | 889.4924  | 445.2498        | 872.4658       | 436.7366         | 871.4818       | 436.2446         | 7  |
| 18 | 2133.9811 | 1067.4942       | 2116.9545      | 1058.9809        | 2115.9705      | 1058.4889        | L    | 758.4519  | 379.7296        | 741.4254       | 371.2163         | 740.4413       | 370.7243         | 6  |
| 19 | 2248.0240 | 1124.5156       | 2230.9975      | 1116.0024        | 2230.0134      | 1115.5104        | N    | 645.3678  | 323.1876        | 628.3413       | 314.6743         | 627.3573       | 314.1823         | 5  |
| 20 | 2377.0666 | 1189.0369       | 2360.0401      | 1180.5237        | 2359.0560      | 1180.0317        | E    | 531.3249  | 266.1661        | 514.2984       | 257.6528         | 513.3144       | 257.1608         | 4  |
| 21 | 2476.1350 | 1238.5711       | 2459.1085      | 1230.0579        | 2458.1245      | 1229.5659        | V    | 402.2823  | 201.6448        | 385.2558       | 193.1315         |                |                  | 3  |
| 22 | 2604.2300 | 1302.6186       | 2587.2034      | 1294.1054        | 2586.2194      | 1293.6133        | K    | 303.2139  | 152.1106        | 286.1874       | 143.5973         |                |                  | 2  |
| 23 |           |                 |                |                  |                |                  | R    | 175.1190  | 88.0631         | 158.0924       | 79.5498          |                |                  | 1  |

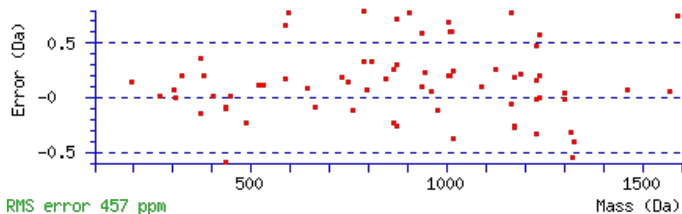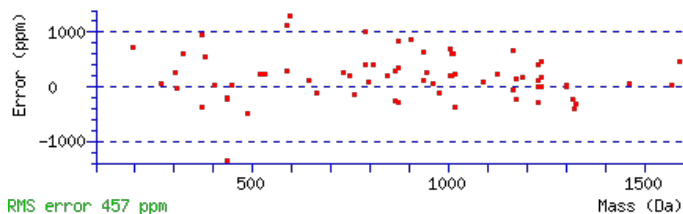

NCBI **BLAST** search of [HGIOYFNNNTQHSSLFMLNEVKR](#)  
 (Parameters: blastp, nr protein database, expect=20000, no filter, PAM30)  
 Other BLAST [web gateways](#)

**All matches to this query**

| Score | Mr(calc)  | Delta   | Sequence                                   | Site Analysis         |
|-------|-----------|---------|--------------------------------------------|-----------------------|
| 72.2  | 2777.3344 | 0.0079  | <a href="#">HGIOYFNNNTQHSSLFMLNEVKR</a>    | Deamidated N8 22.10%  |
| 72.2  | 2777.3344 | 0.0079  | <a href="#">HGIOYFNNNTQHSSLFMLNEVKR</a>    | Deamidated N7 22.10%  |
| 71.2  | 2777.3344 | 0.0079  | <a href="#">HGIOYFNNNTQHSSLFMLNEVKR</a>    | Deamidated N9 17.56%  |
| 71.1  | 2777.3344 | 0.0079  | <a href="#">HGIOYFNNNTQHSSLFMLNEVKR</a>    | Deamidated Q11 16.88% |
| 69.4  | 2777.3344 | 0.0079  | <a href="#">HGIOYFNNNTQHSSLFMLNEVKR</a>    | Deamidated Q4 11.63%  |
| 68.7  | 2777.3344 | 0.0079  | <a href="#">HGIOYFNNNTQHSSLFMLNEVKR</a>    | Deamidated N19 9.74%  |
| 57.5  | 2776.3503 | 0.9919  | <a href="#">HGIOYFNNNTQHSSLFMLNEVKR</a>    |                       |
| 8.5   | 2777.3501 | -0.0078 | <a href="#">LKQSLDSSNESIETNNLCVLEARR</a>   |                       |
| 7.0   | 2776.3409 | 1.0013  | <a href="#">KNNMNRSENTIQSGPEDSLVNSQSLK</a> |                       |
| 6.4   | 2776.3319 | 1.0103  | <a href="#">YHMYATAPPFGEQKQWLFPLR</a>      |                       |

Mascot: <http://www.matrixscience.com/>

# MATRIX SCIENCE Mascot Search Results

## Peptide View

MS/MS Fragmentation of **DIPTNSPELEE'LTHTITKLNAENNATFYFK**

Found in **P01042** in **con\_Xuniprot\_HUMAN3**, KNG1\_HUMAN Kininogen-1 OS=Homo sapiens GN=KNG1 PE=1 SV=2

Match to Query 27827: 3551.746422 from(1184.922750,3+) intensity(73757.4141) rtinseconds(2451) scans(6141) index(9152)

Title: 111019\_Est\_ISCardio\_NMI\_YS\_G\_4Spectrum5303\_scans\_\_6141

Data file C:\mascot\20140703\_Tmgf\_1D\CSV\_UseAnalysis\MasterCSV\All\_Glyco\mgf\ptm\UC18ERLIC\_PTM\_35D.mgf

Click mouse within plot area to zoom in by factor of two about that point

Or, to Da

Label all possible matches Label matches used for scoring

Show Y-axis

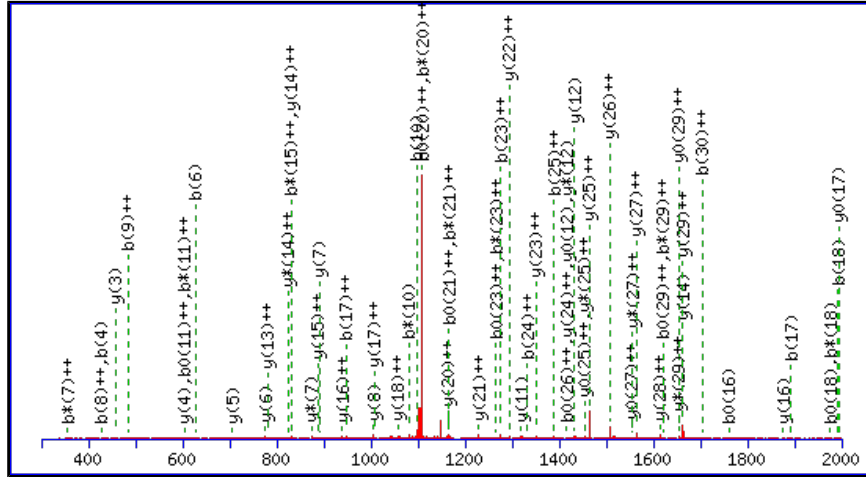

Monoisotopic mass of neutral peptide Mr(calc): 3551.7307

Fixed modifications: Carbamidomethyl (C) (apply to specified residues or termini only)

Variable modifications:

N25 : Deamidated (NQ)

Ions Score: 70 Expect: 2.6e-005

Matches : 66/344 fragment ions using 136 most intense peaks ([help](#))

| #  | b         | b <sup>++</sup> | b <sup>*</sup> | b <sup>*++</sup> | b <sup>0</sup> | b <sup>0++</sup> | Seq. | y         | y <sup>++</sup> | y <sup>*</sup> | y <sup>*++</sup> | y <sup>0</sup> | y <sup>0++</sup> | #  |
|----|-----------|-----------------|----------------|------------------|----------------|------------------|------|-----------|-----------------|----------------|------------------|----------------|------------------|----|
| 1  | 116.0342  | 58.5207         |                |                  | 98.0237        | 49.5155          | D    |           |                 |                |                  |                |                  | 31 |
| 2  | 229.1183  | 115.0628        |                |                  | 211.1077       | 106.0575         | I    | 3437.7111 | 1719.3592       | 3420.6846      | 1710.8459        | 3419.7005      | 1710.3539        | 30 |
| 3  | 326.1710  | 163.5892        |                |                  | 308.1605       | 154.5839         | P    | 3324.6270 | 1662.8172       | 3307.6005      | 1654.3039        | 3306.6165      | 1653.8119        | 29 |
| 4  | 427.2187  | 214.1130        |                |                  | 409.2082       | 205.1077         | T    | 3227.5743 | 1614.2908       | 3210.5477      | 1605.7775        | 3209.5637      | 1605.2855        | 28 |
| 5  | 541.2617  | 271.1345        | 524.2351       | 262.6212         | 523.2511       | 262.1292         | N    | 3126.5266 | 1563.7669       | 3109.5001      | 1555.2537        | 3108.5160      | 1554.7617        | 27 |
| 6  | 628.2937  | 314.6505        | 611.2671       | 306.1372         | 610.2831       | 305.6452         | S    | 3012.4837 | 1506.7455       | 2995.4571      | 1498.2322        | 2994.4731      | 1497.7402        | 26 |
| 7  | 725.3464  | 363.1769        | 708.3199       | 354.6636         | 707.3359       | 354.1716         | P    | 2925.4516 | 1463.2295       | 2908.4251      | 1454.7162        | 2907.4411      | 1454.2242        | 25 |
| 8  | 854.3890  | 427.6982        | 837.3625       | 419.1849         | 836.3785       | 418.6929         | E    | 2828.3989 | 1414.7031       | 2811.3723      | 1406.1898        | 2810.3883      | 1405.6978        | 24 |
| 9  | 967.4731  | 484.2402        | 950.4466       | 475.7269         | 949.4625       | 475.2349         | L    | 2699.3563 | 1350.1818       | 2682.3297      | 1341.6685        | 2681.3457      | 1341.1765        | 23 |
| 10 | 1096.5157 | 548.7615        | 1079.4891      | 540.2482         | 1078.5051      | 539.7562         | E    | 2586.2722 | 1293.6398       | 2569.2457      | 1285.1265        | 2568.2617      | 1284.6345        | 22 |
| 11 | 1225.5583 | 613.2828        | 1208.5317      | 604.7695         | 1207.5477      | 604.2775         | E    | 2457.2296 | 1229.1185       | 2440.2031      | 1220.6052        | 2439.2191      | 1220.1132        | 21 |
| 12 | 1326.6060 | 663.8066        | 1309.5794      | 655.2933         | 1308.5954      | 654.8013         | T    | 2328.1870 | 1164.5972       | 2311.1605      | 1156.0839        | 2310.1765      | 1155.5919        | 20 |
| 13 | 1439.6900 | 720.3487        | 1422.6635      | 711.8354         | 1421.6795      | 711.3434         | L    | 2227.1394 | 1114.0733       | 2210.1128      | 1105.5600        | 2209.1288      | 1105.0680        | 19 |
| 14 | 1540.7377 | 770.8725        | 1523.7112      | 762.3592         | 1522.7271      | 761.8672         | T    | 2114.0553 | 1057.5313       | 2097.0287      | 1049.0180        | 2096.0447      | 1048.5260        | 18 |
| 15 | 1677.7966 | 839.4019        | 1660.7701      | 830.8887         | 1659.7861      | 830.3967         | H    | 2013.0076 | 1007.0074       | 1995.9811      | 998.4942         | 1994.9971      | 998.0022         | 17 |
| 16 | 1778.8443 | 889.9258        | 1761.8178      | 881.4125         | 1760.8337      | 880.9205         | T    | 1875.9487 | 938.4780        | 1858.9222      | 929.9647         | 1857.9381      | 929.4727         | 16 |
| 17 | 1891.9284 | 946.4678        | 1874.9018      | 937.9545         | 1873.9178      | 937.4625         | I    | 1774.9010 | 887.9542        | 1757.8745      | 879.4409         | 1756.8905      | 878.9489         | 15 |
| 18 | 1992.9760 | 996.9917        | 1975.9495      | 988.4784         | 1974.9655      | 987.9864         | T    | 1661.8170 | 831.4121        | 1644.7904      | 822.8988         | 1643.8064      | 822.4068         | 14 |
| 19 | 2121.0710 | 1061.0391       | 2104.0445      | 1052.5259        | 2103.0604      | 1052.0339        | K    | 1560.7693 | 780.8883        | 1543.7427      | 772.3750         | 1542.7587      | 771.8830         | 13 |
| 20 | 2234.1551 | 1117.5812       | 2217.1285      | 1109.0679        | 2216.1445      | 1108.5759        | L    | 1432.6743 | 716.8408        | 1415.6478      | 708.3275         | 1414.6638      | 707.8355         | 12 |
| 21 | 2348.1980 | 1174.6026       | 2331.1714      | 1166.0894        | 2330.1874      | 1165.5974        | N    | 1319.5903 | 660.2988        | 1302.5637      | 651.7855         | 1301.5797      | 651.2935         | 11 |
| 22 | 2419.2351 | 1210.1212       | 2402.2086      | 1201.6079        | 2401.2245      | 1201.1159        | A    | 1205.5473 | 603.2773        | 1188.5208      | 594.7640         | 1187.5368      | 594.2720         | 10 |
| 23 | 2548.2777 | 1274.6425       | 2531.2512      | 1266.1292        | 2530.2671      | 1265.6372        | E    | 1134.5102 | 567.7587        | 1117.4837      | 559.2455         | 1116.4997      | 558.7535         | 9  |



|    |           |                  |           |                  |           |                  |   |                  |          |                 |          |          |          |   |
|----|-----------|------------------|-----------|------------------|-----------|------------------|---|------------------|----------|-----------------|----------|----------|----------|---|
| 24 | 2662.3206 | <b>1331.6640</b> | 2645.2941 | 1323.1507        | 2644.3101 | 1322.6587        | N | <b>1005.4676</b> | 503.2374 | 988.4411        | 494.7242 | 987.4571 | 494.2322 | 8 |
| 25 | 2777.3476 | <b>1389.1774</b> | 2760.3210 | 1380.6642        | 2759.3370 | 1380.1721        | N | <b>891.4247</b>  | 446.2160 | <b>874.3981</b> | 437.7027 | 873.4141 | 437.2107 | 7 |
| 26 | 2848.3847 | 1424.6960        | 2831.3581 | 1416.1827        | 2830.3741 | <b>1415.6907</b> | A | <b>776.3978</b>  | 388.7025 | 759.3712        | 380.1892 | 758.3872 | 379.6972 | 6 |
| 27 | 2949.4324 | 1475.2198        | 2932.4058 | 1466.7065        | 2931.4218 | 1466.2145        | T | <b>705.3606</b>  | 353.1840 | 688.3341        | 344.6707 | 687.3501 | 344.1787 | 5 |
| 28 | 3096.5008 | 1548.7540        | 3079.4742 | 1540.2408        | 3078.4902 | 1539.7487        | F | <b>604.3130</b>  | 302.6601 | 587.2864        | 294.1468 |          |          | 4 |
| 29 | 3259.5641 | 1630.2857        | 3242.5376 | <b>1621.7724</b> | 3241.5535 | <b>1621.2804</b> | Y | <b>457.2445</b>  | 229.1259 | 440.2180        | 220.6126 |          |          | 3 |
| 30 | 3406.6325 | <b>1703.8199</b> | 3389.6060 | 1695.3066        | 3388.6220 | 1694.8146        | F | 294.1812         | 147.5942 | 277.1547        | 139.0810 |          |          | 2 |
| 31 |           |                  |           |                  |           |                  | K | 147.1128         | 74.0600  | 130.0863        | 65.5468  |          |          | 1 |

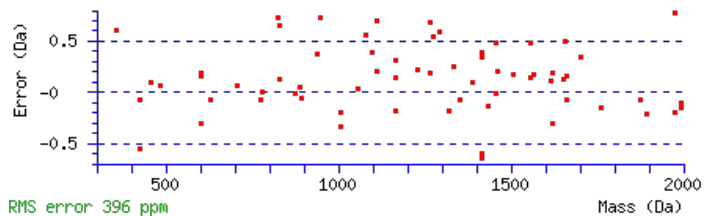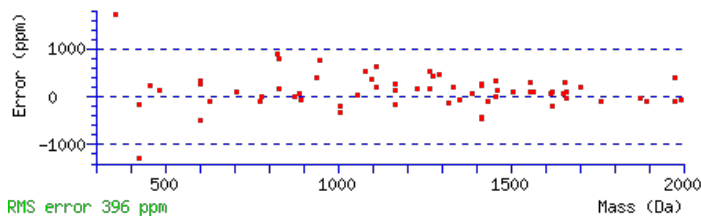

NCBI BLAST search of [DIPTNSPELEETLTHITIKLNAENNATFYFK](#)  
 (Parameters: blastp, nr protein database, expect=20000, no filter, PAM30)  
 Other BLAST [web gateways](#)

All matches to this query

| Score | Mr(calc)  | Delta  | Sequence                                         | Site Analysis         |
|-------|-----------|--------|--------------------------------------------------|-----------------------|
| 70.0  | 3551.7307 | 0.0157 | <a href="#">DIPTNSPELEETLTHITIKLNAENNATFYFK</a>  | Deamidated N25 66.62% |
| 64.7  | 3551.7307 | 0.0157 | <a href="#">DIPTNSPELEETLTHITIKLNAENNATFYFK</a>  | Deamidated N21 19.80% |
| 63.0  | 3551.7307 | 0.0157 | <a href="#">DIPTNSPELEETLTHITIKLNAENNATFYFK</a>  | Deamidated N24 13.32% |
| 46.0  | 3551.7307 | 0.0157 | <a href="#">DIPTNSPELEETLTHITIKLNAENNATFYFK</a>  | Deamidated N5 0.26%   |
| 42.4  | 3550.7467 | 0.9997 | <a href="#">DIPTNSPELEETLTHITIKLNAENNATFYFK</a>  |                       |
| 11.3  | 3551.7462 | 0.0002 | <a href="#">RAEAGYITQLACLMLNQLLELTVLDTNWVMG</a>  |                       |
| 9.3   | 3549.7488 | 1.9976 | <a href="#">YAAAQLSLTQLSSGNPVYEKYYRQVDTGNTGR</a> |                       |
| 8.8   | 3550.7328 | 1.0136 | <a href="#">YAAAQLSLTQLSSGNPVYEKYYRQVDTGNTGR</a> |                       |
| 8.8   | 3550.7328 | 1.0136 | <a href="#">YAAAQLSLTQLSSGNPVYEKYYRQVDTGNTGR</a> |                       |
| 7.8   | 3549.7371 | 2.0093 | <a href="#">HNRFMTELLDSAYPVLSDGMVELIQSPITK</a>   |                       |

Mascot: <http://www.matrixscience.com/>

# MASCOT SCIENCE Mascot Search Results

## Peptide View

MS/MS Fragmentation of **LNAENNATFYFKIDNVKK**

Found in **P01042** in **con\_Xuniprot\_HUMAN3**, KNG1\_HUMAN Kininogen-1 OS=Homo sapiens GN=KNG1 PE=1 SV=2

Match to Query 14378: 2129.087008 from(1065.550780,2+) intensity(29417.3184) rtinseconds(1363) scans(3126) index(10097)

Title: 111019\_Est\_ISCardio\_NMI\_YS\_G\_6Spectrum2641\_scans\_3126

Data file C:\\mascot\\20140703\_Tmgf\_1D\\CSV\_UseAnalysis\\MasterCSV\\All\_Glyco\\mgf\\ptm\\UC18ERLIC\_PTM\_35D.mgf

Click mouse within plot area to zoom in by factor of two about that point

Or, to Da

Label all possible matches Label matches used for scoring

Show Y-axis

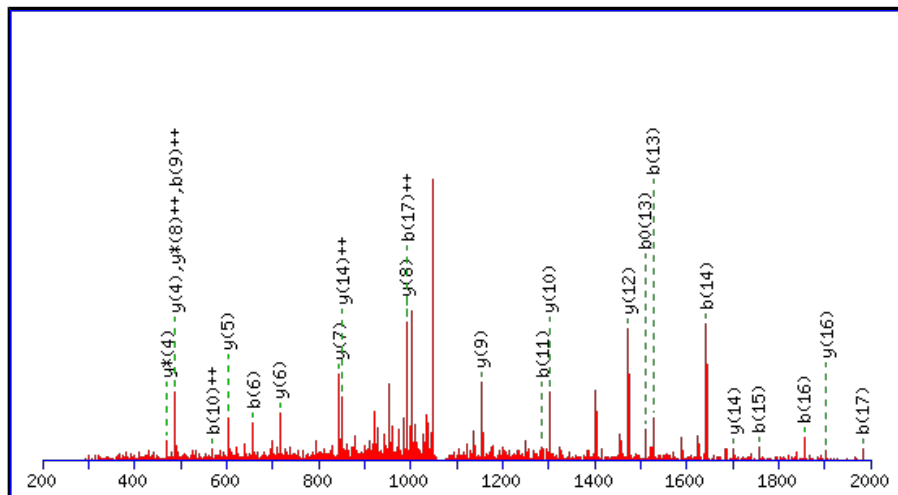

Monoisotopic mass of neutral peptide Mr(calc): 2129.0793

Fixed modifications: Carbamidomethyl (C) (apply to specified residues or termini only)

Variable modifications:

N6 : Deamidated (NQ)

Ions Score: 69 Expect: 2.8e-005

Matches : 24/188 fragment ions using 34 most intense peaks ([help](#))

| #  | b                | b <sup>++</sup> | b*        | b <sup>***</sup> | b <sup>0</sup>   | b <sup>0++</sup> | Seq. | y                | y <sup>++</sup> | y*              | y <sup>***</sup> | y <sup>0</sup> | y <sup>0++</sup> | #  |
|----|------------------|-----------------|-----------|------------------|------------------|------------------|------|------------------|-----------------|-----------------|------------------|----------------|------------------|----|
| 1  | 114.0913         | 57.5493         |           |                  |                  |                  | L    |                  |                 |                 |                  |                |                  | 18 |
| 2  | 228.1343         | 114.5708        | 211.1077  | 106.0575         |                  |                  | N    | 2017.0025        | 1009.0049       | 1999.9760       | 1000.4916        | 1998.9920      | 999.9996         | 17 |
| 3  | 299.1714         | 150.0893        | 282.1448  | 141.5761         |                  |                  | A    | <b>1902.9596</b> | 951.9834        | 1885.9331       | 943.4702         | 1884.9490      | 942.9782         | 16 |
| 4  | 428.2140         | 214.6106        | 411.1874  | 206.0974         | 410.2034         | 205.6053         | E    | 1831.9225        | 916.4649        | 1814.8959       | 907.9516         | 1813.9119      | 907.4596         | 15 |
| 5  | 542.2569         | 271.6321        | 525.2304  | 263.1188         | 524.2463         | 262.6268         | N    | <b>1702.8799</b> | <b>851.9436</b> | 1685.8533       | 843.4303         | 1684.8693      | 842.9383         | 14 |
| 6  | <b>657.2838</b>  | 329.1456        | 640.2573  | 320.6323         | 639.2733         | 320.1403         | N    | 1588.8370        | 794.9221        | 1571.8104       | 786.4088         | 1570.8264      | 785.9168         | 13 |
| 7  | 728.3210         | 364.6641        | 711.2944  | 356.1508         | 710.3104         | 355.6588         | A    | <b>1473.8100</b> | 737.4087        | 1456.7835       | 728.8954         | 1455.7995      | 728.4034         | 12 |
| 8  | 829.3686         | 415.1880        | 812.3421  | 406.6747         | 811.3581         | 406.1827         | T    | 1402.7729        | 701.8901        | 1385.7464       | 693.3768         | 1384.7623      | 692.8848         | 11 |
| 9  | 976.4371         | <b>488.7222</b> | 959.4105  | 480.2089         | 958.4265         | 479.7169         | F    | <b>1301.7252</b> | 651.3663        | 1284.6987       | 642.8530         | 1283.7147      | 642.3610         | 10 |
| 10 | 1139.5004        | <b>570.2538</b> | 1122.4738 | 561.7406         | 1121.4898        | 561.2485         | Y    | <b>1154.6568</b> | 577.8320        | 1137.6303       | 569.3188         | 1136.6463      | 568.8268         | 9  |
| 11 | <b>1286.5688</b> | 643.7880        | 1269.5422 | 635.2748         | 1268.5582        | 634.7828         | F    | <b>991.5935</b>  | 496.3004        | 974.5669        | <b>487.7871</b>  | 973.5829       | 487.2951         | 8  |
| 12 | 1414.6638        | 707.8355        | 1397.6372 | 699.3222         | 1396.6532        | 698.8302         | K    | <b>844.5251</b>  | 422.7662        | 827.4985        | 414.2529         | 826.5145       | 413.7609         | 7  |
| 13 | <b>1527.7478</b> | 764.3775        | 1510.7213 | 755.8643         | <b>1509.7373</b> | 755.3723         | I    | <b>716.4301</b>  | 358.7187        | 699.4036        | 350.2054         | 698.4196       | 349.7134         | 6  |
| 14 | <b>1642.7748</b> | 821.8910        | 1625.7482 | 813.3777         | 1624.7642        | 812.8857         | D    | <b>603.3461</b>  | 302.1767        | 586.3195        | 293.6634         | 585.3355       | 293.1714         | 5  |
| 15 | <b>1756.8177</b> | 878.9125        | 1739.7911 | 870.3992         | 1738.8071        | 869.9072         | N    | <b>488.3191</b>  | 244.6632        | <b>471.2926</b> | 236.1499         |                |                  | 4  |
| 16 | <b>1855.8861</b> | 928.4467        | 1838.8596 | 919.9334         | 1837.8755        | 919.4414         | V    | 374.2762         | 187.6417        | 357.2496        | 179.1285         |                |                  | 3  |
| 17 | <b>1983.9811</b> | <b>992.4942</b> | 1966.9545 | 983.9809         | 1965.9705        | 983.4889         | K    | 275.2078         | 138.1075        | 258.1812        | 129.5942         |                |                  | 2  |
| 18 |                  |                 |           |                  |                  |                  | K    | 147.1128         | 74.0600         | 130.0863        | 65.5468          |                |                  | 1  |

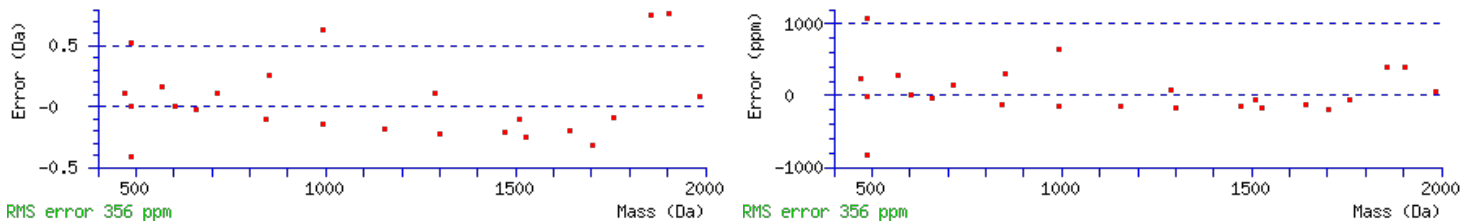

NCBI BLAST search of [LNAENNATFYFKIDNVKK](#)  
 (Parameters: blastp, nr protein database, expect=20000, no filter, PAM30)  
 Other BLAST [web gateways](#)

**All matches to this query**

| Score | Mr(calc)  | Delta   | Sequence                            | Site Analysis        |
|-------|-----------|---------|-------------------------------------|----------------------|
| 69.3  | 2129.0793 | 0.0077  | <a href="#">LNAENNATFYFKIDNVKK</a>  | Deamidated N6 44.43% |
| 69.3  | 2129.0793 | 0.0077  | <a href="#">LNAENNATFYFKIDNVKK</a>  | Deamidated N5 44.43% |
| 61.0  | 2129.0793 | 0.0077  | <a href="#">LNAENNATFYFKIDNVKK</a>  | Deamidated N2 6.53%  |
| 59.5  | 2129.0793 | 0.0077  | <a href="#">LNAENNATFYFKIDNVKK</a>  | Deamidated N15 4.61% |
| 9.8   | 2129.0793 | 0.0077  | <a href="#">KVNDIKFYFTANNEANLK</a>  |                      |
| 9.8   | 2129.0793 | 0.0077  | <a href="#">KVNDIKFYFTANNEANLK</a>  |                      |
| 8.7   | 2129.0827 | 0.0043  | <a href="#">MDQPALLDVFHSSALVDKK</a> |                      |
| 8.2   | 2129.0907 | -0.0037 | <a href="#">MTPTRLGAMPILCIRPNR</a>  |                      |
| 7.0   | 2128.0872 | 0.9998  | <a href="#">RNSQRAAEALQSVLDAEIR</a> |                      |
| 6.8   | 2128.0872 | 0.9998  | <a href="#">RNSQRAAEALQSVLDAEIR</a> |                      |

Mascot: <http://www.matrixscience.com/>

# MATRIX SCIENCE Mascot Search Results

## Peptide View

MS/MS Fragmentation of **ITYSIVQTNSCK**

Found in **P01042** in **con\_Xuniprot\_HUMAN3**, KNG1\_HUMAN Kininogen-1 OS=Homo sapiens GN=KNG1 PE=1 SV=2

Match to Query 2849: 1414.669588 from(708.342070,2+) intensity(3677.8606) rtinseconds(869) scans(1696) index(28368)

Title: 111019\_Est\_MI\_YS\_G\_13Spectrum1418\_scans\_\_1696

Data file C:\\mascot\\20140703\_Tmgf\_1D\\CSV\_UseAnalysis\\MasterCSV\\All\_Glyco\\mgf\\ptm\\UC18ERLIC\_PTM\_35D.mgf

Click mouse within plot area to zoom in by factor of two about that point

Or, to Da

Label all possible matches Label matches used for scoring

Show Y-axis

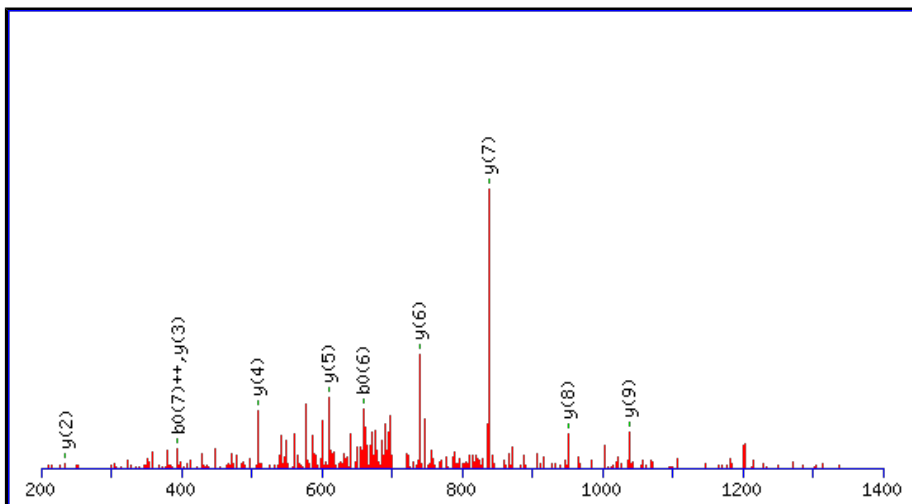

Monoisotopic mass of neutral peptide Mr(calc): 1414.6650

Fixed modifications: Carbamidomethyl (C) (apply to specified residues or termini only)

Variable modifications:

Q7 : Deamidated (NQ)

N9 : Deamidated (NQ)

Ions Score: 63 Expect: 7.6e-005

Matches : 10/116 fragment ions using 12 most intense peaks ([help](#))

| #  | b         | b <sup>++</sup> | b*        | b <sup>+++</sup> | b <sup>0</sup>  | b <sup>0++</sup> | Seq. | y                | y <sup>++</sup> | y*        | y <sup>+++</sup> | y <sup>0</sup> | y <sup>0++</sup> | #  |
|----|-----------|-----------------|-----------|------------------|-----------------|------------------|------|------------------|-----------------|-----------|------------------|----------------|------------------|----|
| 1  | 114.0913  | 57.5493         |           |                  |                 |                  | I    |                  |                 |           |                  |                |                  | 12 |
| 2  | 215.1390  | 108.0731        |           |                  | 197.1285        | 99.0679          | T    | 1302.5882        | 651.7977        | 1285.5617 | 643.2845         | 1284.5776      | 642.7925         | 11 |
| 3  | 378.2023  | 189.6048        |           |                  | 360.1918        | 180.5995         | Y    | 1201.5405        | 601.2739        | 1184.5140 | 592.7606         | 1183.5300      | 592.2686         | 10 |
| 4  | 465.2344  | 233.1208        |           |                  | 447.2238        | 224.1155         | S    | <b>1038.4772</b> | 519.7422        | 1021.4507 | 511.2290         | 1020.4666      | 510.7370         | 9  |
| 5  | 578.3184  | 289.6629        |           |                  | 560.3079        | 280.6576         | I    | <b>951.4452</b>  | 476.2262        | 934.4186  | 467.7130         | 933.4346       | 467.2209         | 8  |
| 6  | 677.3869  | 339.1971        |           |                  | <b>659.3763</b> | 330.1918         | V    | <b>838.3611</b>  | 419.6842        | 821.3346  | 411.1709         | 820.3505       | 410.6789         | 7  |
| 7  | 806.4294  | 403.7184        | 789.4029  | 395.2051         | 788.4189        | <b>394.7131</b>  | Q    | <b>739.2927</b>  | 370.1500        | 722.2661  | 361.6367         | 721.2821       | 361.1447         | 6  |
| 8  | 907.4771  | 454.2422        | 890.4506  | 445.7289         | 889.4666        | 445.2369         | T    | <b>610.2501</b>  | 305.6287        | 593.2236  | 297.1154         | 592.2395       | 296.6234         | 5  |
| 9  | 1022.5041 | 511.7557        | 1005.4775 | 503.2424         | 1004.4935       | 502.7504         | N    | <b>509.2024</b>  | 255.1049        | 492.1759  | 246.5916         | 491.1919       | 246.0996         | 4  |
| 10 | 1182.5347 | 591.7710        | 1165.5082 | 583.2577         | 1164.5242       | 582.7657         | C    | <b>394.1755</b>  | 197.5914        | 377.1489  | 189.0781         | 376.1649       | 188.5861         | 3  |
| 11 | 1269.5667 | 635.2870        | 1252.5402 | 626.7737         | 1251.5562       | 626.2817         | S    | <b>234.1448</b>  | 117.5761        | 217.1183  | 109.0628         | 216.1343       | 108.5708         | 2  |
| 12 |           |                 |           |                  |                 |                  | K    | 147.1128         | 74.0600         | 130.0863  | 65.5468          |                |                  | 1  |

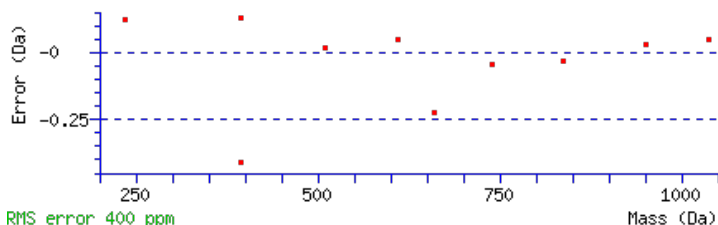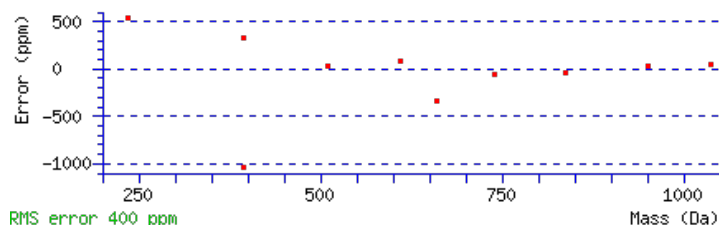

NCBI **BLAST** search of [ITYSIVQTNSCK](#)

(Parameters: blastp, nr protein database, expect=20000, no filter, PAM30)

Other BLAST [web gateways](#)

**All matches to this query**

| Score | Mr(calc)  | Delta   | Sequence                      |
|-------|-----------|---------|-------------------------------|
| 62.9  | 1414.6650 | 0.0046  | <a href="#">ITYSIVQTNSCK</a>  |
| 2.5   | 1414.6762 | -0.0066 | <a href="#">EEPTMQAVLEPR</a>  |
| 1.5   | 1413.6718 | 0.9978  | <a href="#">RHQCRVLCQR</a>    |
| 0.6   | 1413.6670 | 1.0026  | <a href="#">IGAAEQMHLSNSR</a> |

**Mascot:** <http://www.matrixscience.com/>

# MATRIX SCIENCE Mascot Search Results

## Peptide View

MS/MS Fragmentation of **HGIQYFNNNTQHSSLFMLNEVKR**

Found in **P01042** in **con\_Xuniprot\_HUMAN3**, KNG1\_HUMAN Kininogen-1 OS=Homo sapiens GN=KNG1 PE=1 SV=2

Match to Query 25516: 2793.341696 from(699.342700,4+) intensity(65120.5391) rtinseconds(1234) scans(3011) index(15731)

Title: 111019\_Est\_ML\_YP\_G\_05Spectrum2559\_scans\_3011

Data file C:\mascot\20140703\_Tmgf\_1D\CSV\_UseAnalysis\MasterCSV\All\_Glyco\mgf\ptm\UC18ERLIC\_PTM\_35D.mgf

Click mouse within plot area to zoom in by factor of two about that point

Or, to Da

Label all possible matches Label matches used for scoring

Show Y-axis

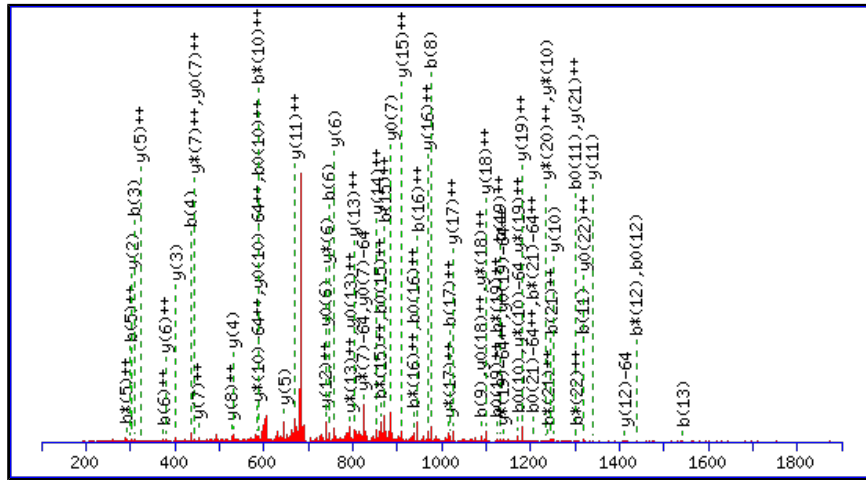

Monoisotopic mass of neutral peptide Mr(calc): 2793.3293

Fixed modifications: Carbamidomethyl (C) (apply to specified residues or termini only)

Variable modifications:

N8 : Deamidated (NQ)

M17 : Oxidation (M), with neutral losses 0.0000(shown in table), 63.9983

Ions Score: 63 Expect: 0.00014

Matches : 74/366 fragment ions using 108 most intense peaks ([help](#))

| #  | b         | b <sup>++</sup> | b <sup>*</sup> | b <sup>*++</sup> | b <sup>0</sup> | b <sup>0++</sup> | Seq. | y         | y <sup>++</sup> | y <sup>*</sup> | y <sup>*++</sup> | y <sup>0</sup> | y <sup>0++</sup> | #  |
|----|-----------|-----------------|----------------|------------------|----------------|------------------|------|-----------|-----------------|----------------|------------------|----------------|------------------|----|
| 1  | 138.0662  | 69.5367         |                |                  |                |                  | H    |           |                 |                |                  |                |                  | 23 |
| 2  | 195.0877  | 98.0475         |                |                  |                |                  | G    | 2657.2777 | 1329.1425       | 2640.2511      | 1320.6292        | 2639.2671      | 1320.1372        | 22 |
| 3  | 308.1717  | 154.5895        |                |                  |                |                  | I    | 2600.2562 | 1300.6317       | 2583.2296      | 1292.1185        | 2582.2456      | 1291.6265        | 21 |
| 4  | 436.2303  | 218.6188        | 419.2037       | 210.1055         |                |                  | Q    | 2487.1721 | 1244.0897       | 2470.1456      | 1235.5764        | 2469.1616      | 1235.0844        | 20 |
| 5  | 599.2936  | 300.1504        | 582.2671       | 291.6372         |                |                  | Y    | 2359.1136 | 1180.0604       | 2342.0870      | 1171.5471        | 2341.1030      | 1171.0551        | 19 |
| 6  | 746.3620  | 373.6847        | 729.3355       | 365.1714         |                |                  | F    | 2196.0502 | 1098.5288       | 2179.0237      | 1090.0155        | 2178.0397      | 1089.5235        | 18 |
| 7  | 860.4050  | 430.7061        | 843.3784       | 422.1928         |                |                  | N    | 2048.9818 | 1024.9945       | 2031.9553      | 1016.4813        | 2030.9712      | 1015.9893        | 17 |
| 8  | 975.4319  | 488.2196        | 958.4054       | 479.7063         |                |                  | N    | 1934.9389 | 967.9731        | 1917.9123      | 959.4598         | 1916.9283      | 958.9678         | 16 |
| 9  | 1089.4748 | 545.2411        | 1072.4483      | 536.7278         |                |                  | N    | 1819.9119 | 910.4596        | 1802.8854      | 901.9463         | 1801.9014      | 901.4543         | 15 |
| 10 | 1190.5225 | 595.7649        | 1173.4960      | 587.2516         | 1172.5119      | 586.7596         | T    | 1705.8690 | 853.4381        | 1688.8425      | 844.9249         | 1687.8585      | 844.4329         | 14 |
| 11 | 1318.5811 | 659.7942        | 1301.5545      | 651.2809         | 1300.5705      | 650.7889         | Q    | 1604.8213 | 802.9143        | 1587.7948      | 794.4010         | 1586.8108      | 793.9090         | 13 |
| 12 | 1455.6400 | 728.3236        | 1438.6135      | 719.8104         | 1437.6294      | 719.3184         | H    | 1476.7628 | 738.8850        | 1459.7362      | 730.3717         | 1458.7522      | 729.8797         | 12 |
| 13 | 1542.6720 | 771.8397        | 1525.6455      | 763.3264         | 1524.6615      | 762.8344         | S    | 1339.7038 | 670.3556        | 1322.6773      | 661.8423         | 1321.6933      | 661.3503         | 11 |
| 14 | 1629.7041 | 815.3557        | 1612.6775      | 806.8424         | 1611.6935      | 806.3504         | S    | 1252.6718 | 626.8395        | 1235.6453      | 618.3263         | 1234.6613      | 617.8343         | 10 |
| 15 | 1742.7881 | 871.8977        | 1725.7616      | 863.3844         | 1724.7776      | 862.8924         | L    | 1165.6398 | 583.3235        | 1148.6132      | 574.8103         | 1147.6292      | 574.3183         | 9  |
| 16 | 1889.8565 | 945.4319        | 1872.8300      | 936.9186         | 1871.8460      | 936.4266         | F    | 1052.5557 | 526.7815        | 1035.5292      | 518.2682         | 1034.5452      | 517.7762         | 8  |
| 17 | 2036.8919 | 1018.9496       | 2019.8654      | 1010.4363        | 2018.8814      | 1009.9443        | M    | 905.4873  | 453.2473        | 888.4608       | 444.7340         | 887.4767       | 444.2420         | 7  |
| 18 | 2149.9760 | 1075.4916       | 2132.9495      | 1066.9784        | 2131.9654      | 1066.4864        | L    | 758.4519  | 379.7296        | 741.4254       | 371.2163         | 740.4413       | 370.7243         | 6  |
| 19 | 2264.0189 | 1132.5131       | 2246.9924      | 1123.9998        | 2246.0084      | 1123.5078        | N    | 645.3678  | 323.1876        | 628.3413       | 314.6743         | 627.3573       | 314.1823         | 5  |
| 20 | 2393.0615 | 1197.0344       | 2376.0350      | 1188.5211        | 2375.0510      | 1188.0291        | E    | 531.3249  | 266.1661        | 514.2984       | 257.6528         | 513.3144       | 257.1608         | 4  |
| 21 | 2492.1299 | 1246.5686       | 2475.1034      | 1238.0553        | 2474.1194      | 1237.5633        | V    | 402.2823  | 201.6448        | 385.2558       | 193.1315         |                |                  | 3  |
| 22 | 2620.2249 | 1310.6161       | 2603.1983      | 1302.1028        | 2602.2143      | 1301.6108        | K    | 303.2139  | 152.1106        | 286.1874       | 143.5973         |                |                  | 2  |

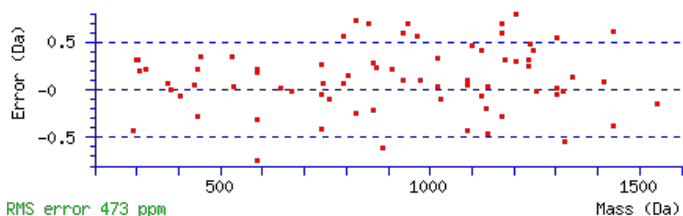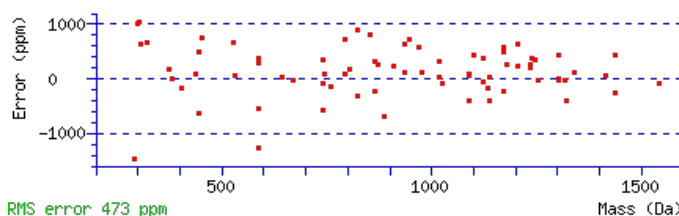

NCBI BLAST search of [HGIQYFNNNTQHSSLFMLNEVKR](#)

(Parameters: blastp, nr protein database, expect=20000, no filter, PAM30)

Other BLAST [web gateways](#)

All matches to this query

| Score | Mr(calc)  | Delta  | Sequence                                   | Site Analysis         |
|-------|-----------|--------|--------------------------------------------|-----------------------|
| 62.8  | 2793.3293 | 0.0124 | <a href="#">HGIQYFNNNTQHSSLFMLNEVKR</a>    | Deamidated N8 36.56%  |
| 61.7  | 2793.3293 | 0.0124 | <a href="#">HGIQYFNNNTQHSSLFMLNEVKR</a>    | Deamidated Q11 28.71% |
| 61.7  | 2793.3293 | 0.0124 | <a href="#">HGIQYFNNNTQHSSLFMLNEVKR</a>    | Deamidated N9 28.71%  |
| 54.8  | 2793.3293 | 0.0124 | <a href="#">HGIQYFNNNTQHSSLFMLNEVKR</a>    | Deamidated N7 5.82%   |
| 37.1  | 2793.3293 | 0.0124 | <a href="#">HGIQYFNNNTQHSSLFMLNEVKR</a>    | Deamidated Q4 0.10%   |
| 36.7  | 2793.3293 | 0.0124 | <a href="#">HGIQYFNNNTQHSSLFMLNEVKR</a>    | Deamidated N19 0.09%  |
| 26.1  | 2792.3453 | 0.9964 | <a href="#">HGIQYFNNNTQHSSLFMLNEVKR</a>    |                       |
| 7.2   | 2793.3305 | 0.0112 | <a href="#">DTGPEVQSSSELSPSLSSVLDVYNQR</a> |                       |
| 4.7   | 2793.3387 | 0.0030 | <a href="#">WLVDMQLQIMQLTLMQRLDDGNK</a>    |                       |
| 4.3   | 2793.3387 | 0.0030 | <a href="#">WLVDMQLQIMQLTLMQRLDDGNK</a>    |                       |

Mascot: <http://www.matrixscience.com/>



# MATRIX SCIENCE Mascot Search Results

## Peptide View

MS/MS Fragmentation of **LNAENNATFYFK**

Found in **P01042** in **con\_Xuniprot\_HUMAN3**, KNG1\_HUMAN Kininogen-1 OS=Homo sapiens GN=KNG1 PE=1 SV=2

Match to Query 3997: 1432.645828 from(717.330190,2+) intensity(602318.7500) rtinseconds(1353) scans(3403) index(18495)

Title: 111019\_Est\_MI\_YP\_G\_08Spectrum2957\_scans\_\_3403

Data file C:\\mascot\\20140703\_Tmgf\_1D\\CSV\_UseAnalysis\\MasterCSV\\All\_Glyco\\mgf\\ptm\\UC18ERLIC\_PTM\_35D.mgf

Click mouse within plot area to zoom in by factor of two about that point

Or, to Da

Label all possible matches Label matches used for scoring

Show Y-axis

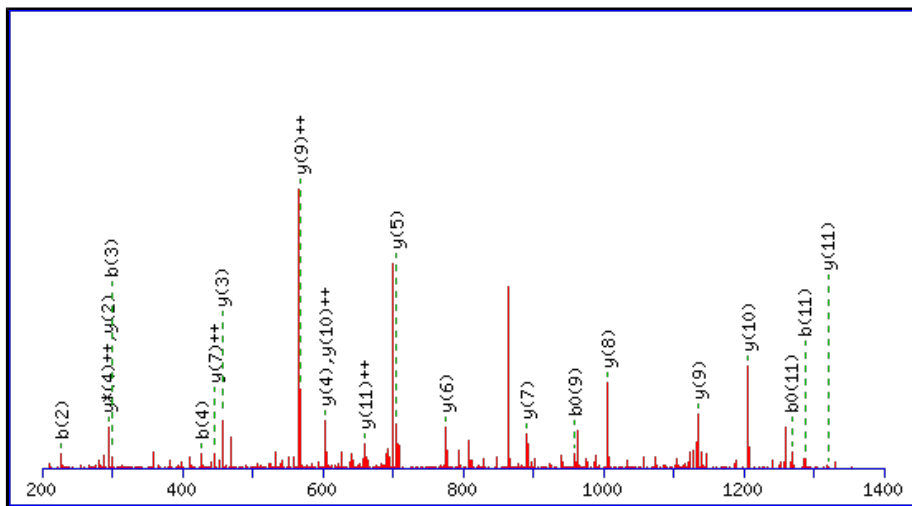

Monoisotopic mass of neutral peptide  $M_r(\text{calc})$ : 1432.6510

Fixed modifications: Carbamidomethyl (C) (apply to specified residues or termini only)

Variable modifications:

N5 : Deamidated (NQ)

N6 : Deamidated (NQ)

Ions Score: 54 Expect: 0.00041

Matches : 21/116 fragment ions using 48 most intense peaks ([help](#))

| #  | b                | b <sup>++</sup> | b*        | b <sup>*++</sup> | b <sup>0</sup>   | b <sup>0++</sup> | Seq. | y                | y <sup>++</sup> | y*        | y <sup>*++</sup> | y <sup>0</sup> | y <sup>0++</sup> | #  |
|----|------------------|-----------------|-----------|------------------|------------------|------------------|------|------------------|-----------------|-----------|------------------|----------------|------------------|----|
| 1  | 114.0913         | 57.5493         |           |                  |                  |                  | L    |                  |                 |           |                  |                |                  | 12 |
| 2  | <b>228.1343</b>  | 114.5708        | 211.1077  | 106.0575         |                  |                  | N    | <b>1320.5743</b> | <b>660.7908</b> | 1303.5477 | 652.2775         | 1302.5637      | 651.7855         | 11 |
| 3  | <b>299.1714</b>  | 150.0893        | 282.1448  | 141.5761         |                  |                  | A    | <b>1206.5313</b> | <b>603.7693</b> | 1189.5048 | 595.2560         | 1188.5208      | 594.7640         | 10 |
| 4  | <b>428.2140</b>  | 214.6106        | 411.1874  | 206.0974         | 410.2034         | 205.6053         | E    | <b>1135.4942</b> | <b>568.2508</b> | 1118.4677 | 559.7375         | 1117.4837      | 559.2455         | 9  |
| 5  | 543.2409         | 272.1241        | 526.2144  | 263.6108         | 525.2304         | 263.1188         | N    | <b>1006.4516</b> | 503.7295        | 989.4251  | 495.2162         | 988.4411       | 494.7242         | 8  |
| 6  | 658.2679         | 329.6376        | 641.2413  | 321.1243         | 640.2573         | 320.6323         | N    | <b>891.4247</b>  | <b>446.2160</b> | 874.3981  | 437.7027         | 873.4141       | 437.2107         | 7  |
| 7  | 729.3050         | 365.1561        | 712.2784  | 356.6429         | 711.2944         | 356.1508         | A    | <b>776.3978</b>  | 388.7025        | 759.3712  | 380.1892         | 758.3872       | 379.6972         | 6  |
| 8  | 830.3527         | 415.6800        | 813.3261  | 407.1667         | 812.3421         | 406.6747         | T    | <b>705.3606</b>  | 353.1840        | 688.3341  | 344.6707         | 687.3501       | 344.1787         | 5  |
| 9  | 977.4211         | 489.2142        | 960.3945  | 480.7009         | <b>959.4105</b>  | 480.2089         | F    | <b>604.3130</b>  | 302.6601        | 587.2864  | <b>294.1468</b>  |                |                  | 4  |
| 10 | 1140.4844        | 570.7458        | 1123.4578 | 562.2326         | 1122.4738        | 561.7406         | Y    | <b>457.2445</b>  | 229.1259        | 440.2180  | 220.6126         |                |                  | 3  |
| 11 | <b>1287.5528</b> | 644.2800        | 1270.5263 | 635.7668         | <b>1269.5422</b> | 635.2748         | F    | <b>294.1812</b>  | 147.5942        | 277.1547  | 139.0810         |                |                  | 2  |
| 12 |                  |                 |           |                  |                  |                  | K    | 147.1128         | 74.0600         | 130.0863  | 65.5468          |                |                  | 1  |

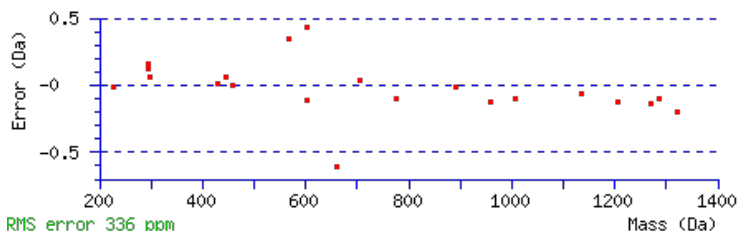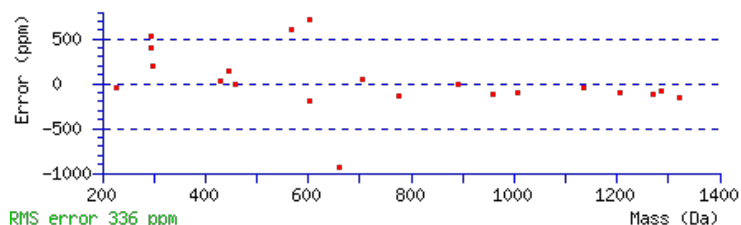

NCBI **BLAST** search of [LNAENNATFYFK](#)

(Parameters: blastp, nr protein database, expect=20000, no filter, PAM30)

Other BLAST [web gateways](#)

**All matches to this query**

| Score | Mr(calc)  | Delta   | Sequence                      | Site Analysis            |
|-------|-----------|---------|-------------------------------|--------------------------|
| 54.3  | 1432.6510 | -0.0052 | <a href="#">LNAENNATFYFK</a>  | Deamidated N5, N6 98.67% |
| 35.2  | 1432.6510 | -0.0052 | <a href="#">LNAENNATFYFK</a>  | Deamidated N2, N6 1.21%  |
| 25.3  | 1432.6510 | -0.0052 | <a href="#">LNAENNATFYFK</a>  | Deamidated N2, N5 0.12%  |
| 6.9   | 1431.6412 | 1.0046  | <a href="#">QETVMATAASNHR</a> |                          |
| 4.8   | 1432.6405 | 0.0053  | <a href="#">NLDQFMDQHRK</a>   |                          |
| 3.8   | 1432.6513 | -0.0054 | <a href="#">DFEMIRGMKMK</a>   |                          |
| 3.5   | 1432.6430 | 0.0029  | <a href="#">DNENSEINQLTR</a>  |                          |
| 3.5   | 1432.6430 | 0.0029  | <a href="#">NNENSEINQLTR</a>  |                          |
| 3.5   | 1432.6430 | 0.0029  | <a href="#">NNENSEINQLTR</a>  |                          |
| 2.6   | 1432.6477 | -0.0018 | <a href="#">NRNGAANMNLNSR</a> |                          |

**Mascot:** <http://www.matrixscience.com/>

# MATRIX SCIENCE Mascot Search Results

## Peptide View

MS/MS Fragmentation of **HGIQYFNNNTQHSFLMLNEVK**

Found in **P01042** in **con\_Xuniprot\_HUMAN3**, KNG1\_HUMAN Kininogen-1 OS=Homo sapiens GN=KNG1 PE=1 SV=2

Match to Query 22372: 2637.236292 from(880.086040,3+) intensity(228665.3125) rtinseconds(1523) scans(3741) index(25320)

Title: 111019\_Est\_MI\_YS\_G\_07Spectrum3175\_scans\_\_3741

Data file C:\mascot\20140703\_Tmgf\_1D\CSV\_UseAnalysis\MasterCSV\All\_Glyco\mgf\ptm\UC18ERLIC\_PTM\_35D.mgf

Click mouse within plot area to zoom in by factor of two about that point

Or, to Da

Label all possible matches Label matches used for scoring

Show Y-axis

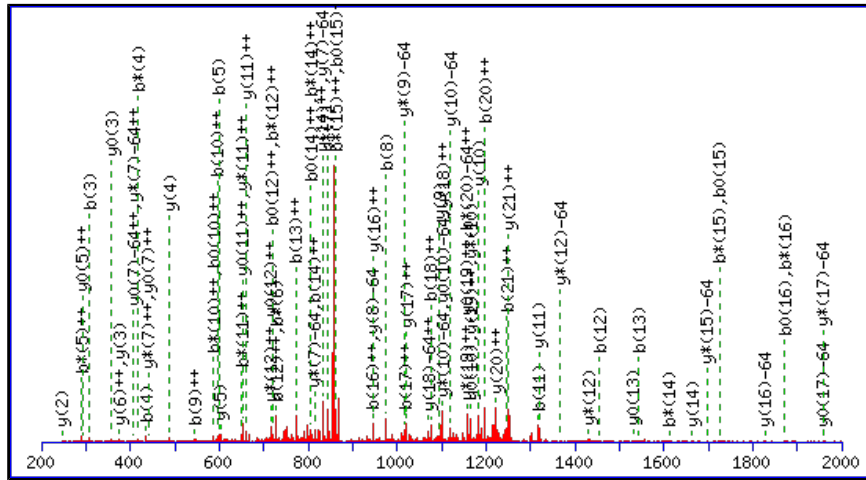

Monoisotopic mass of neutral peptide Mr(calc): 2637.2282

Fixed modifications: Carbamidomethyl (C) (apply to specified residues or termini only)

Variable modifications:

N8 : Deamidated (NQ)

M17 : Oxidation (M), with neutral losses 0.0000(shown in table), 63.9983

Ions Score: 54 Expect: 0.00089

Matches : 82/350 fragment ions using 125 most intense peaks ([help](#))

| #  | b         | b <sup>++</sup> | b <sup>*</sup> | b <sup>*++</sup> | b <sup>0</sup> | b <sup>0++</sup> | Seq. | y         | y <sup>++</sup> | y <sup>*</sup> | y <sup>*++</sup> | y <sup>0</sup> | y <sup>0++</sup> | #  |
|----|-----------|-----------------|----------------|------------------|----------------|------------------|------|-----------|-----------------|----------------|------------------|----------------|------------------|----|
| 1  | 138.0662  | 69.5367         |                |                  |                |                  | H    |           |                 |                |                  |                |                  | 22 |
| 2  | 195.0877  | 98.0475         |                |                  |                |                  | G    | 2501.1766 | 1251.0919       | 2484.1500      | 1242.5786        | 2483.1660      | 1242.0866        | 21 |
| 3  | 308.1717  | 154.5895        |                |                  |                |                  | I    | 2444.1551 | 1222.5812       | 2427.1285      | 1214.0679        | 2426.1445      | 1213.5759        | 20 |
| 4  | 436.2303  | 218.6188        | 419.2037       | 210.1055         |                |                  | Q    | 2331.0710 | 1166.0391       | 2314.0445      | 1157.5259        | 2313.0605      | 1157.0339        | 19 |
| 5  | 599.2936  | 300.1504        | 582.2671       | 291.6372         |                |                  | Y    | 2203.0124 | 1102.0099       | 2185.9859      | 1093.4966        | 2185.0019      | 1093.0046        | 18 |
| 6  | 746.3620  | 373.6847        | 729.3355       | 365.1714         |                |                  | F    | 2039.9491 | 1020.4782       | 2022.9226      | 1011.9649        | 2021.9386      | 1011.4729        | 17 |
| 7  | 860.4050  | 430.7061        | 843.3784       | 422.1928         |                |                  | N    | 1892.8807 | 946.9440        | 1875.8542      | 938.4307         | 1874.8701      | 937.9387         | 16 |
| 8  | 975.4319  | 488.2196        | 958.4054       | 479.7063         |                |                  | N    | 1778.8378 | 889.9225        | 1761.8112      | 881.4093         | 1760.8272      | 880.9172         | 15 |
| 9  | 1089.4748 | 545.2411        | 1072.4483      | 536.7278         |                |                  | N    | 1663.8108 | 832.4091        | 1646.7843      | 823.8958         | 1645.8003      | 823.4038         | 14 |
| 10 | 1190.5225 | 595.7649        | 1173.4960      | 587.2516         | 1172.5119      | 586.7596         | T    | 1549.7679 | 775.3876        | 1532.7414      | 766.8743         | 1531.7573      | 766.3823         | 13 |
| 11 | 1318.5811 | 659.7942        | 1301.5545      | 651.2809         | 1300.5705      | 650.7889         | Q    | 1448.7202 | 724.8638        | 1431.6937      | 716.3505         | 1430.7097      | 715.8585         | 12 |
| 12 | 1455.6400 | 728.3236        | 1438.6135      | 719.8104         | 1437.6294      | 719.3184         | H    | 1320.6616 | 660.8345        | 1303.6351      | 652.3212         | 1302.6511      | 651.8292         | 11 |
| 13 | 1542.6720 | 771.8397        | 1525.6455      | 763.3264         | 1524.6615      | 762.8344         | S    | 1183.6027 | 592.3050        | 1166.5762      | 583.7917         | 1165.5922      | 583.2997         | 10 |
| 14 | 1629.7041 | 815.3557        | 1612.6775      | 806.8424         | 1611.6935      | 806.3504         | S    | 1096.5707 | 548.7890        | 1079.5442      | 540.2757         | 1078.5601      | 539.7837         | 9  |
| 15 | 1742.7881 | 871.8977        | 1725.7616      | 863.3844         | 1724.7776      | 862.8924         | L    | 1009.5387 | 505.2730        | 992.5121       | 496.7597         | 991.5281       | 496.2677         | 8  |
| 16 | 1889.8565 | 945.4319        | 1872.8300      | 936.9186         | 1871.8460      | 936.4266         | F    | 896.4546  | 448.7309        | 879.4281       | 440.2177         | 878.4441       | 439.7257         | 7  |
| 17 | 2036.8919 | 1018.9496       | 2019.8654      | 1010.4363        | 2018.8814      | 1009.9443        | M    | 749.3862  | 375.1967        | 732.3597       | 366.6835         | 731.3756       | 366.1915         | 6  |
| 18 | 2149.9760 | 1075.4916       | 2132.9495      | 1066.9784        | 2131.9654      | 1066.4864        | L    | 602.3508  | 301.6790        | 585.3243       | 293.1658         | 584.3402       | 292.6738         | 5  |
| 19 | 2264.0189 | 1132.5131       | 2246.9924      | 1123.9998        | 2246.0084      | 1123.5078        | N    | 489.2667  | 245.1370        | 472.2402       | 236.6237         | 471.2562       | 236.1317         | 4  |
| 20 | 2393.0615 | 1197.0344       | 2376.0350      | 1188.5211        | 2375.0510      | 1188.0291        | E    | 375.2238  | 188.1155        | 358.1973       | 179.6023         | 357.2132       | 179.1103         | 3  |
| 21 | 2492.1299 | 1246.5686       | 2475.1034      | 1238.0553        | 2474.1194      | 1237.5633        | V    | 246.1812  | 123.5942        | 229.1547       | 115.0810         |                |                  | 2  |
| 22 |           |                 |                |                  |                |                  | K    | 147.1128  | 74.0600         | 130.0863       | 65.5468          |                |                  | 1  |

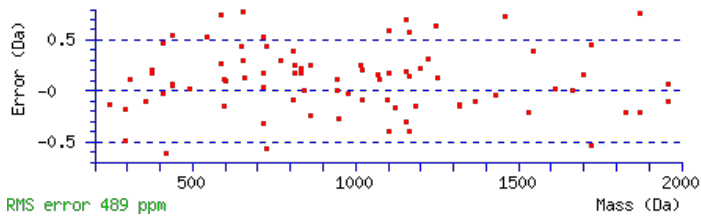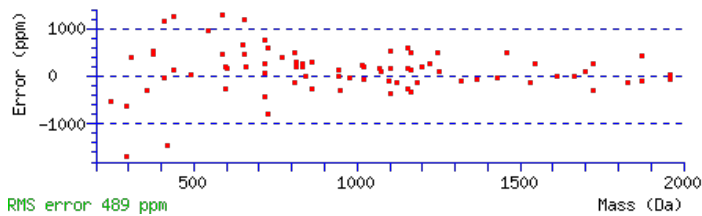

NCBI **BLAST** search of [HGIQYFNNNTQHSSLFMLNEVK](#)  
 (Parameters: blastp, nr protein database, expect=20000, no filter, PAM30)  
 Other BLAST [web gateways](#)

**All matches to this query**

| Score | Mr(calc)  | Delta  | Sequence                                 | Site Analysis        |
|-------|-----------|--------|------------------------------------------|----------------------|
| 54.0  | 2637.2282 | 0.0081 | <a href="#">HGIQYFNNNTQHSSLFMLNEVK</a>   | Deamidated N8 28.14% |
| 53.2  | 2637.2282 | 0.0081 | <a href="#">HGIQYFNNNTQHSSLFMLNEVK</a>   | Deamidated N9 23.46% |
| 53.1  | 2637.2282 | 0.0081 | <a href="#">HGIQYFNNNTQHSSLFMLNEVK</a>   | Deamidated N7 23.19% |
| 52.4  | 2637.2282 | 0.0081 | <a href="#">HGIQYFNNNTQHSSLFMLNEVK</a>   | Deamidated Q4 19.70% |
| 46.8  | 2637.2282 | 0.0081 | <a href="#">HGIQYFNNNTQHSSLFMLNEVK</a>   | Deamidated Q11 5.46% |
| 29.3  | 2636.2442 | 0.9921 | <a href="#">HGIQYFNNNTQHSSLFMLNEVK</a>   |                      |
| 25.4  | 2637.2282 | 0.0081 | <a href="#">HGIQYFNNNTQHSSLFMLNEVK</a>   | Deamidated N19 0.04% |
| 6.2   | 2636.2361 | 1.0002 | <a href="#">SLTGTRAPQNNGHQSIHNISSEMR</a> |                      |
| 3.0   | 2637.2335 | 0.0028 | <a href="#">VEMLLAANLOSSMAQLPMEELNR</a>  |                      |
| 3.0   | 2635.2184 | 2.0179 | <a href="#">EEIPDPDVKGSPLSDSACLGQQR</a>  |                      |

Mascot: <http://www.matrixscience.com/>

# MATRIX SCIENCE Mascot Search Results

## Peptide View

MS/MS Fragmentation of **LNAENNATFYFK**

Found in **P01042** in **con\_Xuniprot\_HUMAN3**, KNG1\_HUMAN Kininogen-1 OS=Homo sapiens GN=KNG1 PE=1 SV=2

Match to Query 3995: 1432.645548 from(717.330050,2+) intensity(239272.0625) rtinseconds(1513) scans(3623) index(20282)

Title: 111019\_Est\_MI\_YP\_G\_10Spectrum3159\_scans\_\_3623

Data file C:\\mascot\\20140703\_Tmgf\_1D\\CSV\_UseAnalysis\\MasterCSV\\All\_Glyco\\mgf\\ptm\\UC18ERLIC\_PTM\_35D.mgf

Click mouse within plot area to zoom in by factor of two about that point

Or, to Da

Label all possible matches Label matches used for scoring

Show Y-axis

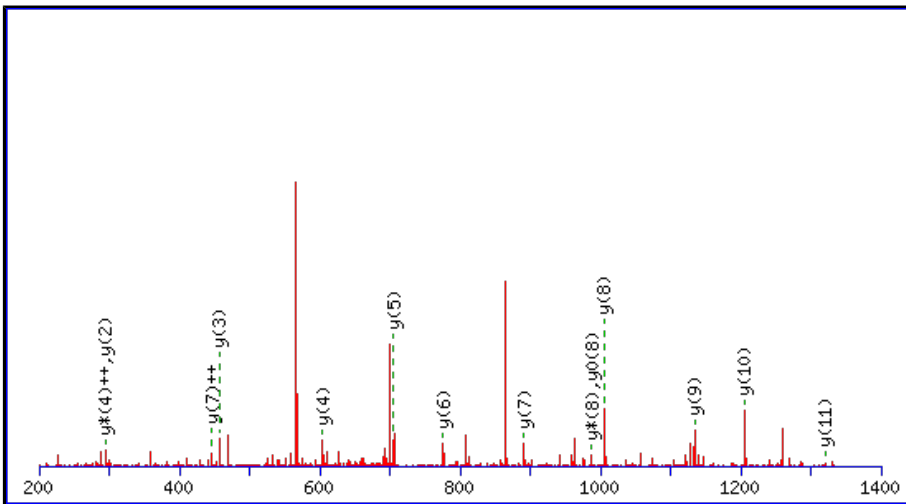

Monoisotopic mass of neutral peptide Mr(calc): 1432.6510

Fixed modifications: Carbamidomethyl (C) (apply to specified residues or termini only)

Variable modifications:

N2 : Deamidated (NQ)

N6 : Deamidated (NQ)

Ions Score: 51 Expect: 0.00086

Matches : 14/116 fragment ions using 36 most intense peaks ([help](#))

| #  | b         | b <sup>++</sup> | b*        | b <sup>+++</sup> | b <sup>0</sup> | b <sup>0++</sup> | Seq. | y         | y <sup>++</sup> | y*        | y <sup>+++</sup> | y <sup>0</sup> | y <sup>0++</sup> | #  |
|----|-----------|-----------------|-----------|------------------|----------------|------------------|------|-----------|-----------------|-----------|------------------|----------------|------------------|----|
| 1  | 114.0913  | 57.5493         |           |                  |                |                  | L    |           |                 |           |                  |                |                  | 12 |
| 2  | 229.1183  | 115.0628        | 212.0917  | 106.5495         |                |                  | N    | 1320.5743 | 660.7908        | 1303.5477 | 652.2775         | 1302.5637      | 651.7855         | 11 |
| 3  | 300.1554  | 150.5813        | 283.1288  | 142.0681         |                |                  | A    | 1205.5473 | 603.2773        | 1188.5208 | 594.7640         | 1187.5368      | 594.2720         | 10 |
| 4  | 429.1980  | 215.1026        | 412.1714  | 206.5894         | 411.1874       | 206.0974         | E    | 1134.5102 | 567.7587        | 1117.4837 | 559.2455         | 1116.4997      | 558.7535         | 9  |
| 5  | 543.2409  | 272.1241        | 526.2144  | 263.6108         | 525.2304       | 263.1188         | N    | 1005.4676 | 503.2375        | 988.4411  | 494.7242         | 987.4571       | 494.2322         | 8  |
| 6  | 658.2679  | 329.6376        | 641.2413  | 321.1243         | 640.2573       | 320.6323         | N    | 891.4247  | 446.2160        | 874.3981  | 437.7027         | 873.4141       | 437.2107         | 7  |
| 7  | 729.3050  | 365.1561        | 712.2784  | 356.6429         | 711.2944       | 356.1508         | A    | 776.3978  | 388.7025        | 759.3712  | 380.1892         | 758.3872       | 379.6972         | 6  |
| 8  | 830.3527  | 415.6800        | 813.3261  | 407.1667         | 812.3421       | 406.6747         | T    | 705.3606  | 353.1840        | 688.3341  | 344.6707         | 687.3501       | 344.1787         | 5  |
| 9  | 977.4211  | 489.2142        | 960.3945  | 480.7009         | 959.4105       | 480.2089         | F    | 604.3130  | 302.6601        | 587.2864  | 294.1468         |                |                  | 4  |
| 10 | 1140.4844 | 570.7458        | 1123.4578 | 562.2326         | 1122.4738      | 561.7406         | Y    | 457.2445  | 229.1259        | 440.2180  | 220.6126         |                |                  | 3  |
| 11 | 1287.5528 | 644.2800        | 1270.5263 | 635.7668         | 1269.5422      | 635.2748         | F    | 294.1812  | 147.5942        | 277.1547  | 139.0810         |                |                  | 2  |
| 12 |           |                 |           |                  |                |                  | K    | 147.1128  | 74.0600         | 130.0863  | 65.5468          |                |                  | 1  |

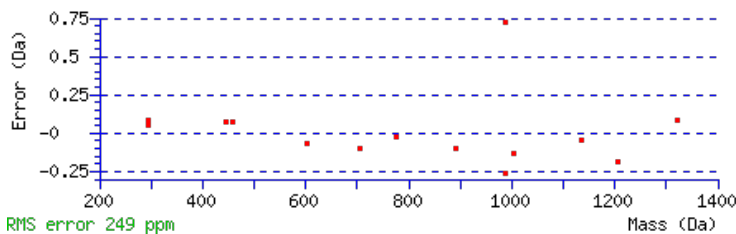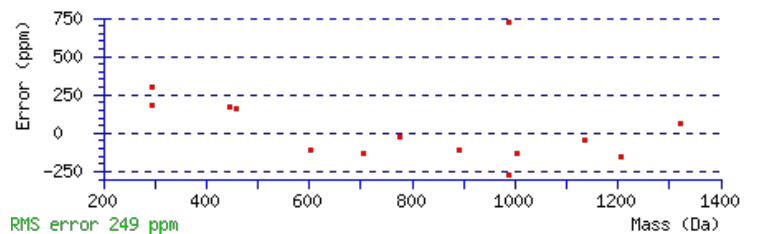

NCBI **BLAST** search of [LNAENNATFYFK](#)

(Parameters: blastp, nr protein database, expect=20000, no filter, PAM30)

Other BLAST [web gateways](#)

**All matches to this query**

| Score | Mr(calc)  | Delta   | Sequence                       | Site Analysis            |
|-------|-----------|---------|--------------------------------|--------------------------|
| 51.1  | 1432.6510 | -0.0055 | <a href="#">LNAENNATFYFK</a>   | Deamidated N2, N6 84.68% |
| 41.8  | 1432.6510 | -0.0055 | <a href="#">LNAENNATFYFK</a>   | Deamidated N5, N6 9.93%  |
| 39.1  | 1432.6510 | -0.0055 | <a href="#">LNAENNATFYFK</a>   | Deamidated N2, N5 5.39%  |
| 8.1   | 1431.6412 | 1.0043  | <a href="#">QETVMATAASNHR</a>  |                          |
| 0.6   | 1430.6421 | 2.0034  | <a href="#">TPAQAE PDVMPMK</a> |                          |
| 0.4   | 1432.6510 | -0.0055 | <a href="#">EWGPPLKEEDAY</a>   |                          |
| 0.3   | 1430.6426 | 2.0030  | <a href="#">LLHQEEDNYNR</a>    |                          |
| 0.3   | 1430.6426 | 2.0030  | <a href="#">LLHQEEDNYNR</a>    |                          |

**Mascot:** <http://www.matrixscience.com/>

# MASCOT SCIENCE Mascot Search Results

## Peptide View

MS/MS Fragmentation of **HGIQYFNNNTQHSSLFMLNEVK**

Found in **P01042** in **con\_Xuniprot\_HUMAN3**, KNG1\_HUMAN Kininogen-1 OS=Homo sapiens GN=KNG1 PE=1 SV=2

Match to Query 22343: 2621.246412 from(874.756080,3+) intensity(69248.4531) rtinseconds(1616) scans(4047) index(22596)

Title: 111019\_Est\_MI\_YS\_G\_03Spectrum3530\_scans\_\_4047

Data file C:\mascot\20140703\_Tmgf\_1D\CSV\_UseAnalysis\MasterCSV\All\_Glyco\mgf\ptm\UC18ERLIC\_PTM\_35D.mgf

Click mouse within plot area to zoom in by factor of two about that point

Or,  to  Da

Label all possible matches  Label matches used for scoring

Show Y-axis

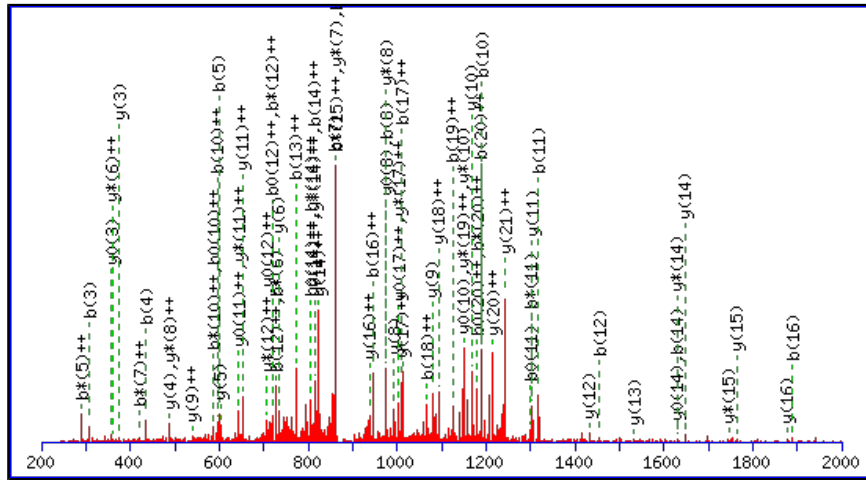

Monoisotopic mass of neutral peptide Mr(calc): 2621.2332

Fixed modifications: Carbamidomethyl (C) (apply to specified residues or termini only)

Variable modifications:

N8 : Deamidated (NQ)

Ions Score: 50 Expect: 0.0024

Matches : 75/224 fragment ions using 140 most intense peaks ([help](#))

| #  | b         | b <sup>++</sup> | b*        | b <sup>*++</sup> | b <sup>0</sup> | b <sup>0++</sup> | Seq. | y         | y <sup>++</sup> | y*        | y <sup>*++</sup> | y <sup>0</sup> | y <sup>0++</sup> | #  |
|----|-----------|-----------------|-----------|------------------|----------------|------------------|------|-----------|-----------------|-----------|------------------|----------------|------------------|----|
| 1  | 138.0662  | 69.5367         |           |                  |                |                  | H    |           |                 |           |                  |                |                  | 22 |
| 2  | 195.0877  | 98.0475         |           |                  |                |                  | G    | 2485.1816 | 1243.0945       | 2468.1551 | 1234.5812        | 2467.1711      | 1234.0892        | 21 |
| 3  | 308.1717  | 154.5895        |           |                  |                |                  | I    | 2428.1602 | 1214.5837       | 2411.1336 | 1206.0704        | 2410.1496      | 1205.5784        | 20 |
| 4  | 436.2303  | 218.6188        | 419.2037  | 210.1055         |                |                  | Q    | 2315.0761 | 1158.0417       | 2298.0496 | 1149.5284        | 2297.0655      | 1149.0364        | 19 |
| 5  | 599.2936  | 300.1504        | 582.2671  | 291.6372         |                |                  | Y    | 2187.0175 | 1094.0124       | 2169.9910 | 1085.4991        | 2169.0070      | 1085.0071        | 18 |
| 6  | 746.3620  | 373.6847        | 729.3355  | 365.1714         |                |                  | F    | 2023.9542 | 1012.4807       | 2006.9277 | 1003.9675        | 2005.9436      | 1003.4755        | 17 |
| 7  | 860.4050  | 430.7061        | 843.3784  | 422.1928         |                |                  | N    | 1876.8858 | 938.9465        | 1859.8592 | 930.4333         | 1858.8752      | 929.9412         | 16 |
| 8  | 975.4319  | 488.2196        | 958.4054  | 479.7063         |                |                  | N    | 1762.8429 | 881.9251        | 1745.8163 | 873.4118         | 1744.8323      | 872.9198         | 15 |
| 9  | 1089.4748 | 545.2411        | 1072.4483 | 536.7278         |                |                  | N    | 1647.8159 | 824.4116        | 1630.7894 | 815.8983         | 1629.8054      | 815.4063         | 14 |
| 10 | 1190.5225 | 595.7649        | 1173.4960 | 587.2516         | 1172.5119      | 586.7596         | T    | 1533.7730 | 767.3901        | 1516.7464 | 758.8769         | 1515.7624      | 758.3849         | 13 |
| 11 | 1318.5811 | 659.7942        | 1301.5545 | 651.2809         | 1300.5705      | 650.7889         | Q    | 1432.7253 | 716.8663        | 1415.6988 | 708.3530         | 1414.7147      | 707.8610         | 12 |
| 12 | 1455.6400 | 728.3236        | 1438.6135 | 719.8104         | 1437.6294      | 719.3184         | H    | 1304.6667 | 652.8370        | 1287.6402 | 644.3237         | 1286.6562      | 643.8317         | 11 |
| 13 | 1542.6720 | 771.8397        | 1525.6455 | 763.3264         | 1524.6615      | 762.8344         | S    | 1167.6078 | 584.3075        | 1150.5813 | 575.7943         | 1149.5973      | 575.3023         | 10 |
| 14 | 1629.7041 | 815.3557        | 1612.6775 | 806.8424         | 1611.6935      | 806.3504         | S    | 1080.5758 | 540.7915        | 1063.5492 | 532.2783         | 1062.5652      | 531.7863         | 9  |
| 15 | 1742.7881 | 871.8977        | 1725.7616 | 863.3844         | 1724.7776      | 862.8924         | L    | 993.5438  | 497.2755        | 976.5172  | 488.7622         | 975.5332       | 488.2702         | 8  |
| 16 | 1889.8565 | 945.4319        | 1872.8300 | 936.9186         | 1871.8460      | 936.4266         | F    | 880.4597  | 440.7335        | 863.4332  | 432.2202         | 862.4491       | 431.7282         | 7  |
| 17 | 2020.8970 | 1010.9521       | 2003.8705 | 1002.4389        | 2002.8865      | 1001.9469        | M    | 733.3913  | 367.1993        | 716.3647  | 358.6860         | 715.3807       | 358.1940         | 6  |
| 18 | 2133.9811 | 1067.4942       | 2116.9545 | 1058.9809        | 2115.9705      | 1058.4889        | L    | 602.3508  | 301.6790        | 585.3243  | 293.1658         | 584.3402       | 292.6738         | 5  |
| 19 | 2248.0240 | 1124.5156       | 2230.9975 | 1116.0024        | 2230.0134      | 1115.5104        | N    | 489.2667  | 245.1370        | 472.2402  | 236.6237         | 471.2562       | 236.1317         | 4  |
| 20 | 2377.0666 | 1189.0369       | 2360.0401 | 1180.5237        | 2359.0560      | 1180.0317        | E    | 375.2238  | 188.1155        | 358.1973  | 179.6023         | 357.2132       | 179.1103         | 3  |
| 21 | 2476.1350 | 1238.5711       | 2459.1085 | 1230.0579        | 2458.1245      | 1229.5659        | V    | 246.1812  | 123.5942        | 229.1547  | 115.0810         |                |                  | 2  |
| 22 |           |                 |           |                  |                |                  | K    | 147.1128  | 74.0600         | 130.0863  | 65.5468          |                |                  | 1  |



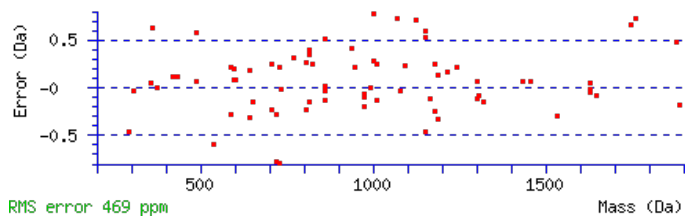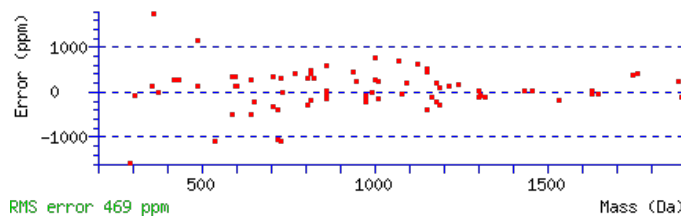

NCBI BLAST search of [HGIQYFNNNTQHSSLEMLNEVK](#)

(Parameters: blastp, nr protein database, expect=20000, no filter, PAM30)

Other BLAST [web gateways](#)

**All matches to this query**

| Score | Mr(calc)  | Delta   | Sequence                                | Site Analysis         |
|-------|-----------|---------|-----------------------------------------|-----------------------|
| 50.2  | 2621.2332 | 0.0132  | <a href="#">HGIQYFNNNTQHSSLEMLNEVK</a>  | Deamidated N8 37.33%  |
| 48.7  | 2621.2332 | 0.0132  | <a href="#">HGIQYFNNNTQHSSLEMLNEVK</a>  | Deamidated N9 26.43%  |
| 46.4  | 2621.2332 | 0.0132  | <a href="#">HGIQYFNNNTQHSSLEMLNEVK</a>  | Deamidated N7 15.38%  |
| 46.4  | 2621.2332 | 0.0132  | <a href="#">HGIQYFNNNTQHSSLEMLNEVK</a>  | Deamidated Q11 15.31% |
| 41.8  | 2621.2332 | 0.0132  | <a href="#">HGIQYFNNNTQHSSLEMLNEVK</a>  | Deamidated Q4 5.31%   |
| 32.8  | 2620.2492 | 0.9972  | <a href="#">HGIQYFNNNTQHSSLEMLNEVK</a>  |                       |
| 28.2  | 2621.2332 | 0.0132  | <a href="#">HGIQYFNNNTQHSSLEMLNEVK</a>  | Deamidated N19 0.23%  |
| 7.6   | 2621.2490 | -0.0026 | <a href="#">LKQSLDSSNESIETNNLCVLEAR</a> |                       |
| 6.5   | 2619.2270 | 2.0194  | <a href="#">QMLFQMEKSDKVPNLVYMDLR</a>   |                       |
| 6.4   | 2621.2490 | -0.0026 | <a href="#">LKQSLDSSNESIETNNLCVLEAR</a> |                       |

Mascot: <http://www.matrixscience.com/>

# MATRIX SCIENCE Mascot Search Results

## Peptide View

MS/MS Fragmentation of **ITYSIVQTNCSKENFLFLTPDCK**

Found in **P01042** in **con\_Xuniprot\_HUMAN3**, KNG1\_HUMAN Kininogen-1 OS=Homo sapiens GN=KNG1 PE=1 SV=2

Match to Query 25500: 2778.336252 from(927.119360,3+) intensity(44735.9922) rtinseconds(2199) scans(5301) index(16939)

Title: 111019\_Est\_ML\_YP\_G\_06Spectrum4396\_scans\_\_5301

Data file C:\mascot\20140703\_Tmgf\_1D\CSV\_UseAnalysis\MasterCSV\All\_Glyco\mgf\ptm\UC18ERLIC\_PTM\_35D.mgf

Click mouse within plot area to zoom in by factor of two about that point

Or, to Da

Label all possible matches Label matches used for scoring

Show Y-axis

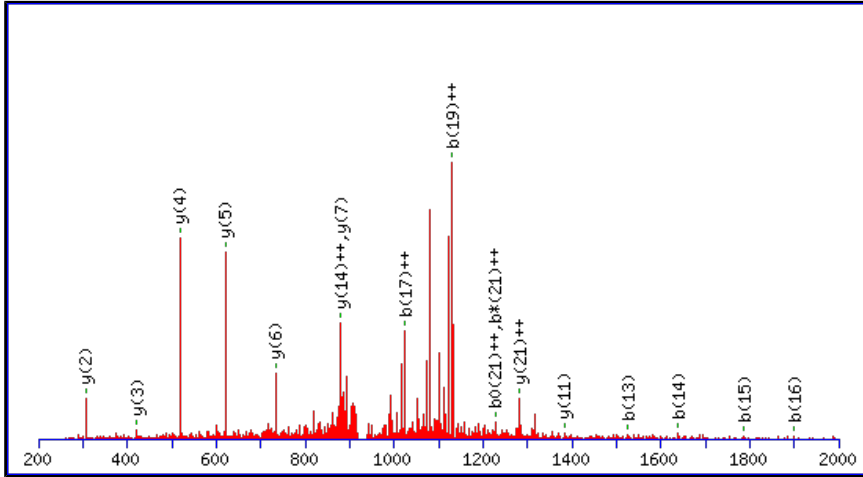

Monoisotopic mass of neutral peptide Mr(calc): 2778.3244

Fixed modifications: Carbamidomethyl (C) (apply to specified residues or termini only)

Variable modifications:

N9 : Deamidated (NQ)

Ions Score: 50 Expect: 0.003

Matches : 17/246 fragment ions using 18 most intense peaks ([help](#))

| #  | b         | b <sup>++</sup> | b <sup>*</sup> | b <sup>*++</sup> | b <sup>0</sup> | b <sup>0++</sup> | Seq. | y         | y <sup>++</sup> | y <sup>*</sup> | y <sup>*++</sup> | y <sup>0</sup> | y <sup>0++</sup> | #  |
|----|-----------|-----------------|----------------|------------------|----------------|------------------|------|-----------|-----------------|----------------|------------------|----------------|------------------|----|
| 1  | 114.0913  | 57.5493         |                |                  |                |                  | I    |           |                 |                |                  |                |                  | 23 |
| 2  | 215.1390  | 108.0731        |                |                  | 197.1285       | 99.0679          | T    | 2666.2477 | 1333.6275       | 2649.2211      | 1325.1142        | 2648.2371      | 1324.6222        | 22 |
| 3  | 378.2023  | 189.6048        |                |                  | 360.1918       | 180.5995         | Y    | 2565.2000 | 1283.1036       | 2548.1734      | 1274.5904        | 2547.1894      | 1274.0984        | 21 |
| 4  | 465.2344  | 233.1208        |                |                  | 447.2238       | 224.1155         | S    | 2402.1367 | 1201.5720       | 2385.1101      | 1193.0587        | 2384.1261      | 1192.5667        | 20 |
| 5  | 578.3184  | 289.6629        |                |                  | 560.3079       | 280.6576         | I    | 2315.1046 | 1158.0560       | 2298.0781      | 1149.5427        | 2297.0941      | 1149.0507        | 19 |
| 6  | 677.3869  | 339.1971        |                |                  | 659.3763       | 330.1918         | V    | 2202.0206 | 1101.5139       | 2184.9940      | 1093.0006        | 2184.0100      | 1092.5086        | 18 |
| 7  | 805.4454  | 403.2264        | 788.4189       | 394.7131         | 787.4349       | 394.2211         | Q    | 2102.9522 | 1051.9797       | 2085.9256      | 1043.4664        | 2084.9416      | 1042.9744        | 17 |
| 8  | 906.4931  | 453.7502        | 889.4666       | 445.2369         | 888.4825       | 444.7449         | T    | 1974.8936 | 987.9504        | 1957.8670      | 979.4372         | 1956.8830      | 978.9451         | 16 |
| 9  | 1021.5201 | 511.2637        | 1004.4935      | 502.7504         | 1003.5095      | 502.2584         | N    | 1873.8459 | 937.4266        | 1856.8193      | 928.9133         | 1855.8353      | 928.4213         | 15 |
| 10 | 1181.5507 | 591.2790        | 1164.5242      | 582.7657         | 1163.5401      | 582.2737         | C    | 1758.8190 | 879.9131        | 1741.7924      | 871.3998         | 1740.8084      | 870.9078         | 14 |
| 11 | 1268.5827 | 634.7950        | 1251.5562      | 626.2817         | 1250.5722      | 625.7897         | S    | 1598.7883 | 799.8978        | 1581.7618      | 791.3845         | 1580.7777      | 790.8925         | 13 |
| 12 | 1396.6777 | 698.8425        | 1379.6511      | 690.3292         | 1378.6671      | 689.8372         | K    | 1511.7563 | 756.3818        | 1494.7297      | 747.8685         | 1493.7457      | 747.3765         | 12 |
| 13 | 1525.7203 | 763.3638        | 1508.6937      | 754.8505         | 1507.7097      | 754.3585         | E    | 1383.6613 | 692.3343        | 1366.6348      | 683.8210         | 1365.6507      | 683.3290         | 11 |
| 14 | 1639.7632 | 820.3852        | 1622.7367      | 811.8720         | 1621.7526      | 811.3800         | N    | 1254.6187 | 627.8130        | 1237.5922      | 619.2997         | 1236.6082      | 618.8077         | 10 |
| 15 | 1786.8316 | 893.9195        | 1769.8051      | 885.4062         | 1768.8211      | 884.9142         | F    | 1140.5758 | 570.7915        | 1123.5492      | 562.2783         | 1122.5652      | 561.7863         | 9  |
| 16 | 1899.9157 | 950.4615        | 1882.8891      | 941.9482         | 1881.9051      | 941.4562         | L    | 993.5074  | 497.2573        | 976.4808       | 488.7441         | 975.4968       | 488.2520         | 8  |
| 17 | 2046.9841 | 1023.9957       | 2029.9576      | 1015.4824        | 2028.9735      | 1014.9904        | F    | 880.4233  | 440.7153        | 863.3968       | 432.2020         | 862.4128       | 431.7100         | 7  |
| 18 | 2160.0682 | 1080.5377       | 2143.0416      | 1072.0244        | 2142.0576      | 1071.5324        | L    | 733.3549  | 367.1811        | 716.3284       | 358.6678         | 715.3443       | 358.1758         | 6  |
| 19 | 2261.1158 | 1131.0616       | 2244.0893      | 1122.5483        | 2243.1053      | 1122.0563        | T    | 620.2708  | 310.6391        | 603.2443       | 302.1258         | 602.2603       | 301.6338         | 5  |
| 20 | 2358.1686 | 1179.5879       | 2341.1421      | 1171.0747        | 2340.1580      | 1170.5827        | P    | 519.2232  | 260.1152        | 502.1966       | 251.6019         | 501.2126       | 251.1099         | 4  |
| 21 | 2473.1956 | 1237.1014       | 2456.1690      | 1228.5881        | 2455.1850      | 1228.0961        | D    | 422.1704  | 211.5888        | 405.1438       | 203.0756         | 404.1598       | 202.5836         | 3  |
| 22 | 2633.2262 | 1317.1167       | 2616.1997      | 1308.6035        | 2615.2156      | 1308.1115        | C    | 307.1435  | 154.0754        | 290.1169       | 145.5621         |                |                  | 2  |
| 23 |           |                 |                |                  |                |                  | K    | 147.1128  | 74.0600         | 130.0863       | 65.5468          |                |                  | 1  |

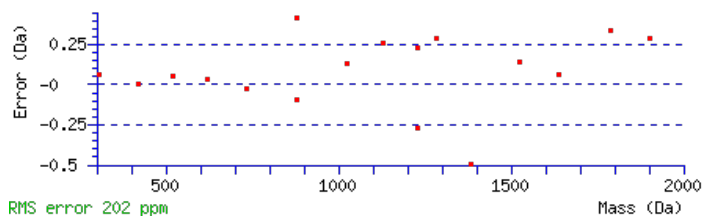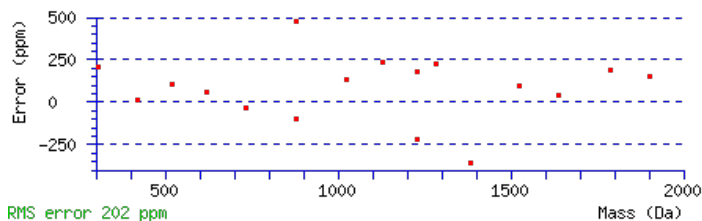

NCBI BLAST search of [ITYSIVQTNC SKENFLFLTPDCK](#)  
 (Parameters: blastp, nr protein database, expect=20000, no filter, PAM30)  
 Other BLAST [web gateways](#)

**All matches to this query**

| Score | Mr(calc)  | Delta  | Sequence                                  | Site Analysis        |
|-------|-----------|--------|-------------------------------------------|----------------------|
| 49.6  | 2778.3244 | 0.0118 | <a href="#">ITYSIVQTNC SKENFLFLTPDCK</a>  | Deamidated N9 49.63% |
| 49.6  | 2778.3244 | 0.0118 | <a href="#">ITYSIVQTNC SKENFLFLTPDCK</a>  | Deamidated Q7 49.63% |
| 35.0  | 2777.3404 | 0.9958 | <a href="#">ITYSIVQTNC SKENFLFLTPDCK</a>  |                      |
| 31.4  | 2778.3244 | 0.0118 | <a href="#">ITYSIVQTNC SKENFLFLTPDCK</a>  | Deamidated N14 0.74% |
| 9.9   | 2778.3246 | 0.0116 | <a href="#">AVIGILQMICKTCCHIMLSQEEK</a>   |                      |
| 8.6   | 2777.3355 | 1.0007 | <a href="#">DSDENLTDAEGKVIGLQIENIDTDR</a> |                      |
| 6.4   | 2776.3185 | 2.0178 | <a href="#">LDNATCRSAIDQLAQQQEDEKTLK</a>  |                      |
| 3.8   | 2776.3378 | 1.9985 | <a href="#">YLGMPskeestyQAASVLHNVHGLK</a> |                      |
| 3.5   | 2776.3166 | 2.0196 | <a href="#">EEMHYKAVHNTAVLFLQNDPGFAK</a>  |                      |
| 3.4   | 2778.3317 | 0.0046 | <a href="#">FIEEMMVDQTASIEGKTAGSHVLNR</a> |                      |

Mascot: <http://www.matrixscience.com/>

# MATRIX SCIENCE Mascot Search Results

## Peptide View

MS/MS Fragmentation of **LNAENNATFYFKIDNVK**

Found in **P01042** in **con\_Xuniprot\_HUMAN3**, KNG1\_HUMAN Kininogen-1 OS=Homo sapiens GN=KNG1 PE=1 SV=2

Match to Query 12217: 2000.989722 from(668.003850,3+) intensity(32877.6523) rtinseconds(1576) scans(3820) index(12611)

Title: 111019\_Est\_ISCardio\_NMI\_YS\_G\_9Spectrum3334\_scans\_\_3820

Data file C:\\mascot\\20140703\_Tmgf\_1D\\CSV\_UseAnalysis\\MasterCSV\\All\_Glyco\\mgf\\ptm\\UC18ERLIC\_PTM\_35D.mgf

Click mouse within plot area to zoom in by factor of two about that point

Or, to Da

Label all possible matches Label matches used for scoring

Show Y-axis

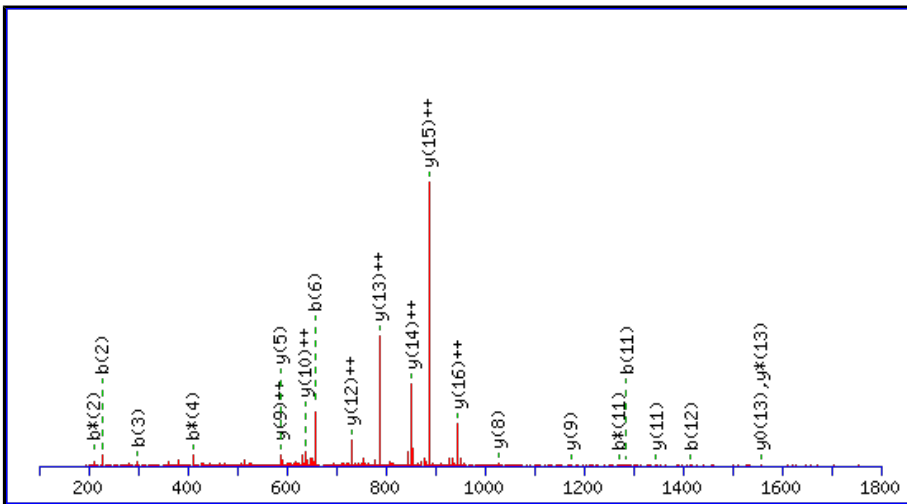

Monoisotopic mass of neutral peptide Mr(calc): 2000.9843

Fixed modifications: Carbamidomethyl (C) (apply to specified residues or termini only)

Variable modifications:

N6 : Deamidated (NQ)

Ions Score: 45 Expect: 0.0081

Matches : 21/178 fragment ions using 32 most intense peaks ([help](#))

| #  | b                | b <sup>++</sup> | b <sup>*</sup>   | b <sup>*++</sup> | b <sup>0</sup> | b <sup>0++</sup> | Seq. | y                | y <sup>++</sup> | y <sup>*</sup>   | y <sup>*++</sup> | y <sup>0</sup>   | y <sup>0++</sup> | #  |
|----|------------------|-----------------|------------------|------------------|----------------|------------------|------|------------------|-----------------|------------------|------------------|------------------|------------------|----|
| 1  | 114.0913         | 57.5493         |                  |                  |                |                  | L    |                  |                 |                  |                  |                  |                  | 17 |
| 2  | <b>228.1343</b>  | 114.5708        | <b>211.1077</b>  | 106.0575         |                |                  | N    | 1888.9076        | <b>944.9574</b> | 1871.8810        | 936.4441         | 1870.8970        | 935.9521         | 16 |
| 3  | <b>299.1714</b>  | 150.0893        | 282.1448         | 141.5761         |                |                  | A    | 1774.8646        | <b>887.9360</b> | 1757.8381        | 879.4227         | 1756.8541        | 878.9307         | 15 |
| 4  | 428.2140         | 214.6106        | <b>411.1874</b>  | 206.0974         | 410.2034       | 205.6053         | E    | 1703.8275        | <b>852.4174</b> | 1686.8010        | 843.9041         | 1685.8170        | 843.4121         | 14 |
| 5  | 542.2569         | 271.6321        | 525.2304         | 263.1188         | 524.2463       | 262.6268         | N    | 1574.7849        | <b>787.8961</b> | <b>1557.7584</b> | 779.3828         | <b>1556.7744</b> | 778.8908         | 13 |
| 6  | <b>657.2838</b>  | 329.1456        | 640.2573         | 320.6323         | 639.2733       | 320.1403         | N    | 1460.7420        | <b>730.8746</b> | 1443.7155        | 722.3614         | 1442.7314        | 721.8694         | 12 |
| 7  | 728.3210         | 364.6641        | 711.2944         | 356.1508         | 710.3104       | 355.6588         | A    | <b>1345.7151</b> | 673.3612        | 1328.6885        | 664.8479         | 1327.7045        | 664.3559         | 11 |
| 8  | 829.3686         | 415.1880        | 812.3421         | 406.6747         | 811.3581       | 406.1827         | T    | 1274.6780        | <b>637.8426</b> | 1257.6514        | 629.3293         | 1256.6674        | 628.8373         | 10 |
| 9  | 976.4371         | 488.7222        | 959.4105         | 480.2089         | 958.4265       | 479.7169         | F    | <b>1173.6303</b> | <b>587.3188</b> | 1156.6037        | 578.8055         | 1155.6197        | 578.3135         | 9  |
| 10 | 1139.5004        | 570.2538        | 1122.4738        | 561.7406         | 1121.4898      | 561.2485         | Y    | <b>1026.5619</b> | 513.7846        | 1009.5353        | 505.2713         | 1008.5513        | 504.7793         | 8  |
| 11 | <b>1286.5688</b> | 643.7880        | <b>1269.5422</b> | 635.2748         | 1268.5582      | 634.7828         | F    | 863.4985         | 432.2529        | 846.4720         | 423.7396         | 845.4880         | 423.2476         | 7  |
| 12 | <b>1414.6638</b> | 707.8355        | 1397.6372        | 699.3222         | 1396.6532      | 698.8302         | K    | 716.4301         | 358.7187        | 699.4036         | 350.2054         | 698.4196         | 349.7134         | 6  |
| 13 | 1527.7478        | 764.3775        | 1510.7213        | 755.8643         | 1509.7373      | 755.3723         | I    | <b>588.3352</b>  | 294.6712        | 571.3086         | 286.1579         | 570.3246         | 285.6659         | 5  |
| 14 | 1642.7748        | 821.8910        | 1625.7482        | 813.3777         | 1624.7642      | 812.8857         | D    | 475.2511         | 238.1292        | 458.2245         | 229.6159         | 457.2405         | 229.1239         | 4  |
| 15 | 1756.8177        | 878.9125        | 1739.7911        | 870.3992         | 1738.8071      | 869.9072         | N    | 360.2241         | 180.6157        | 343.1976         | 172.1024         |                  |                  | 3  |
| 16 | 1855.8861        | 928.4467        | 1838.8596        | 919.9334         | 1837.8755      | 919.4414         | V    | 246.1812         | 123.5942        | 229.1547         | 115.0810         |                  |                  | 2  |
| 17 |                  |                 |                  |                  |                |                  | K    | 147.1128         | 74.0600         | 130.0863         | 65.5468          |                  |                  | 1  |

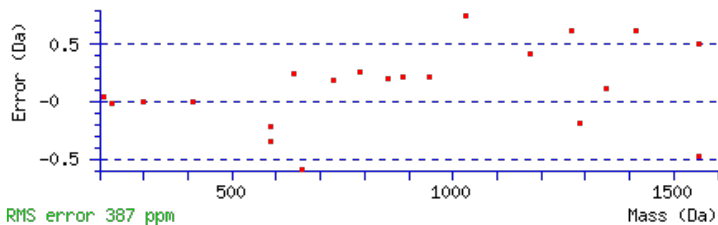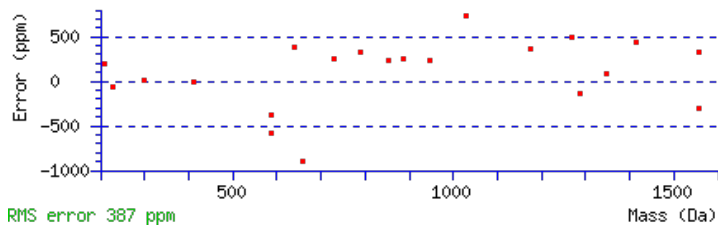

NCBI **BLAST** search of [LNAENNATFYFKIDNVK](#)

(Parameters: blastp, nr protein database, expect=20000, no filter, PAM30)

Other BLAST [web gateways](#)

**All matches to this query**

| Score | Mr(calc)  | Delta   | Sequence                           | Site Analysis        |
|-------|-----------|---------|------------------------------------|----------------------|
| 45.4  | 2000.9843 | 0.0054  | <a href="#">LNAENNATFYFKIDNVK</a>  | Deamidated N6 43.57% |
| 45.4  | 2000.9843 | 0.0054  | <a href="#">LNAENNATFYFKIDNVK</a>  | Deamidated N5 43.57% |
| 39.5  | 2000.9843 | 0.0054  | <a href="#">LNAENNATFYFKIDNVK</a>  | Deamidated N2 11.43% |
| 30.5  | 2000.9843 | 0.0054  | <a href="#">LNAENNATFYFKIDNVK</a>  | Deamidated N15 1.43% |
| 12.4  | 2000.9901 | -0.0004 | <a href="#">INDENQKQKAELLAQEK</a>  |                      |
| 9.8   | 2000.9989 | -0.0092 | <a href="#">NNGSLDRPYYSKSLK</a>    |                      |
| 8.6   | 1999.9922 | 0.9975  | <a href="#">EQIEVRAAQSTSPRNANK</a> |                      |
| 8.6   | 1999.9922 | 0.9975  | <a href="#">EQIEVRAAQSTSPRNANK</a> |                      |
| 8.4   | 1999.9950 | 0.9948  | <a href="#">LOGLOEGLESDDVQVOIK</a> |                      |
| 8.1   | 2000.9901 | -0.0004 | <a href="#">INDENQKQKAELLAQEK</a>  |                      |

Mascot: <http://www.matrixscience.com/>

# MASCOT SCIENCE Mascot Search Results

## Peptide View

MS/MS Fragmentation of **KYNSQSQSNNQFVLYR**

Found in **P01042** in **con\_Xuniprot\_HUMAN3**, KNG1\_HUMAN Kininogen-1 OS=Homo sapiens GN=KNG1 PE=1 SV=2

Match to Query 12223: 2002.956342 from(668.659390,3+) intensity(155496.6875) rtinseconds(840) scans(1856) index(9345)

Title: 111019\_Est\_ISCardio\_NMI\_YS\_G\_5Spectrum1564\_scans\_\_1856

Data file C:\\mascot\\20140703\_Tmgf\_1D\\CSV\_UseAnalysis\\MasterCSV\\All\_Glyco\\mgf\\ptm\\UC18ERLIC\_PTM\_35D.mgf

Click mouse within plot area to zoom in by factor of two about that point

Or, to Da

Label all possible matches Label matches used for scoring

Show Y-axis

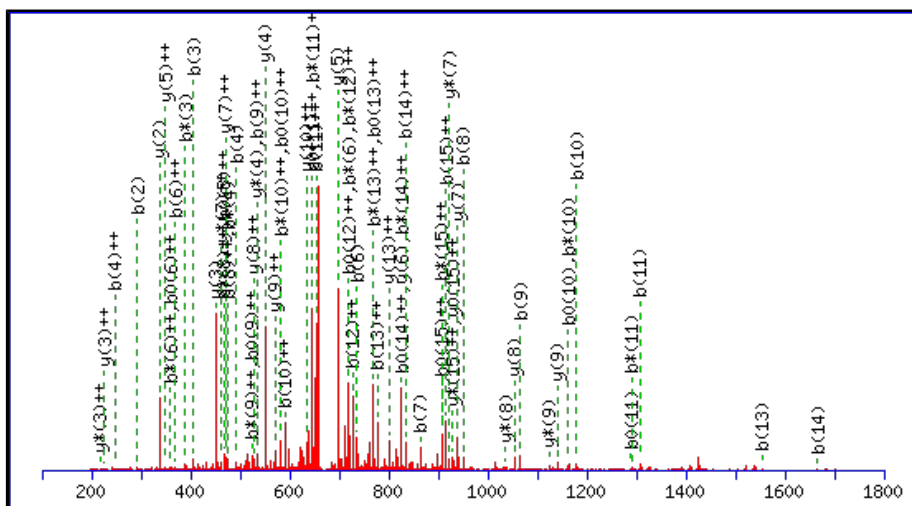

Monoisotopic mass of neutral peptide Mr(calc): 2002.9497

Fixed modifications: Carbamidomethyl (C) (apply to specified residues or termini only)

Variable modifications:

N6 : Deamidated (NQ)

Ions Score: 39 Expect: 0.027

Matches : 69/158 fragment ions using 147 most intense peaks ([help](#))

| #  | b                | b <sup>++</sup> | b <sup>*</sup>  | b <sup>*++</sup> | b <sup>0</sup> | b <sup>0++</sup> | Seq.     | y                | y <sup>++</sup> | y <sup>*</sup>   | y <sup>*++</sup> | y <sup>0</sup> | y <sup>0++</sup> | #  |
|----|------------------|-----------------|-----------------|------------------|----------------|------------------|----------|------------------|-----------------|------------------|------------------|----------------|------------------|----|
| 1  | 129.1022         | 65.0548         | 112.0757        | 56.5415          |                |                  | <b>K</b> |                  |                 |                  |                  |                |                  | 16 |
| 2  | <b>292.1656</b>  | 146.5864        | 275.1390        | 138.0731         |                |                  | <b>Y</b> | 1875.8620        | 938.4346        | 1858.8355        | <b>929.9214</b>  | 1857.8515      | <b>929.4294</b>  | 15 |
| 3  | <b>406.2085</b>  | 203.6079        | <b>389.1819</b> | 195.0946         |                |                  | <b>N</b> | 1712.7987        | 856.9030        | 1695.7721        | 848.3897         | 1694.7881      | 847.8977         | 14 |
| 4  | <b>493.2405</b>  | <b>247.1239</b> | <b>476.2140</b> | 238.6106         | 475.2300       | 238.1186         | <b>S</b> | 1598.7558        | <b>799.8815</b> | 1581.7292        | 791.3682         | 1580.7452      | 790.8762         | 13 |
| 5  | 621.2991         | 311.1532        | 604.2726        | 302.6399         | 603.2885       | 302.1479         | <b>Q</b> | 1511.7237        | 756.3655        | 1494.6972        | 747.8522         | 1493.7132      | 747.3602         | 12 |
| 6  | <b>736.3260</b>  | <b>368.6667</b> | <b>719.2995</b> | <b>360.1534</b>  | 718.3155       | <b>359.6614</b>  | <b>N</b> | 1383.6652        | 692.3362        | 1366.6386        | 683.8229         | 1365.6546      | 683.3309         | 11 |
| 7  | <b>864.3846</b>  | 432.6959        | 847.3581        | 424.1827         | 846.3741       | 423.6907         | <b>Q</b> | 1268.6382        | <b>634.8227</b> | 1251.6117        | 626.3095         | 1250.6276      | 625.8175         | 10 |
| 8  | <b>951.4167</b>  | <b>476.2120</b> | 934.3901        | <b>467.6987</b>  | 933.4061       | <b>467.2067</b>  | <b>S</b> | <b>1140.5796</b> | <b>570.7935</b> | <b>1123.5531</b> | 562.2802         | 1122.5691      | 561.7882         | 9  |
| 9  | <b>1065.4596</b> | <b>533.2334</b> | 1048.4330       | <b>524.7202</b>  | 1047.4490      | <b>524.2281</b>  | <b>N</b> | <b>1053.5476</b> | <b>527.2774</b> | <b>1036.5211</b> | 518.7642         |                |                  | 8  |
| 10 | <b>1179.5025</b> | <b>590.2549</b> | 1162.4760       | <b>581.7416</b>  | 1161.4919      | <b>581.2496</b>  | <b>N</b> | <b>939.5047</b>  | <b>470.2560</b> | <b>922.4781</b>  | <b>461.7427</b>  |                |                  | 7  |
| 11 | <b>1307.5611</b> | <b>654.2842</b> | 1290.5345       | <b>645.7709</b>  | 1289.5505      | <b>645.2789</b>  | <b>Q</b> | <b>825.4618</b>  | 413.2345        | 808.4352         | 404.7212         |                |                  | 6  |
| 12 | 1454.6295        | <b>727.8184</b> | 1437.6029       | <b>719.3051</b>  | 1436.6189      | <b>718.8131</b>  | <b>F</b> | <b>697.4032</b>  | <b>349.2052</b> | 680.3766         | 340.6920         |                |                  | 5  |
| 13 | <b>1553.6979</b> | <b>777.3526</b> | 1536.6714       | <b>768.8393</b>  | 1535.6873      | <b>768.3473</b>  | <b>V</b> | <b>550.3348</b>  | 275.6710        | <b>533.3082</b>  | 267.1577         |                |                  | 4  |
| 14 | <b>1666.7820</b> | <b>833.8946</b> | 1649.7554       | <b>825.3814</b>  | 1648.7714      | <b>824.8893</b>  | <b>L</b> | <b>451.2663</b>  | <b>226.1368</b> | 434.2398         | <b>217.6235</b>  |                |                  | 3  |
| 15 | 1829.8453        | <b>915.4263</b> | 1812.8188       | <b>906.9130</b>  | 1811.8347      | <b>906.4210</b>  | <b>Y</b> | <b>338.1823</b>  | 169.5948        | 321.1557         | 161.0815         |                |                  | 2  |
| 16 |                  |                 |                 |                  |                |                  | <b>R</b> | 175.1190         | 88.0631         | 158.0924         | 79.5498          |                |                  | 1  |

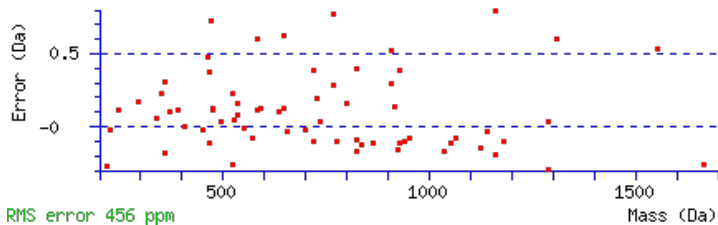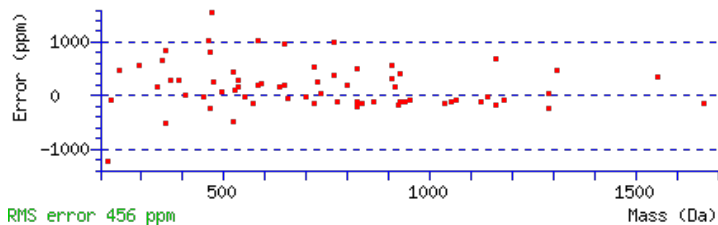

NCBI **BLAST** search of [KYNSQNSNNQFVLYR](#)

(Parameters: blastp, nr protein database, expect=20000, no filter, PAM30)

Other BLAST [web gateways](#)

**All matches to this query**

| Score | Mr(calc)  | Delta  | Sequence                            | Site Analysis        |
|-------|-----------|--------|-------------------------------------|----------------------|
| 39.1  | 2002.9497 | 0.0067 | <a href="#">KYNSQNSNNQFVLYR</a>     | Deamidated N6 23.11% |
| 39.1  | 2002.9497 | 0.0067 | <a href="#">KYNSQNSNNQFVLYR</a>     | Deamidated Q5 23.11% |
| 38.7  | 2002.9497 | 0.0067 | <a href="#">KYNSQNSNNQFVLYR</a>     | Deamidated Q7 21.08% |
| 35.1  | 2002.9497 | 0.0067 | <a href="#">KYNSQNSNNQFVLYR</a>     | Deamidated N3 9.27%  |
| 35.1  | 2002.9497 | 0.0067 | <a href="#">KYNSQNSNNQFVLYR</a>     | Deamidated N9 9.12%  |
| 34.3  | 2002.9497 | 0.0067 | <a href="#">KYNSQNSNNQFVLYR</a>     | Deamidated N10 7.69% |
| 33.7  | 2002.9497 | 0.0067 | <a href="#">KYNSQNSNNQFVLYR</a>     | Deamidated Q11 6.62% |
| 17.6  | 2002.9537 | 0.0026 | <a href="#">TFEPIVQNHDTEFDLYR</a>   |                      |
| 12.4  | 2002.9537 | 0.0026 | <a href="#">TFEPIVQNHDTEFDLYR</a>   |                      |
| 8.2   | 2001.9540 | 1.0023 | <a href="#">MGFEFNIMVVGQSGLGKST</a> |                      |

Mascot: <http://www.matrixscience.com/>



# MASCOT SCIENCE Mascot Search Results

## Peptide View

MS/MS Fragmentation of **YAGRANLTNFPENGTFVVNIAQLSQDDSGR**

Found in **P01833** in **con\_Xuniprot\_HUMAN3**, PIGR\_HUMAN Polymeric immunoglobulin receptor OS=Homo sapiens GN=PIGR PE=1 SV=4

Match to Query 27386: 3256.568262 from(1086.530030,3+) intensity(0.0000) rtinseconds(2197) scans(5752) index(19829)

Title: 111019\_Est\_MI\_YP\_G\_09Spectrum5084\_scans\_\_5752

Data file C:\mascot\20140703\_Tmgf\_1D\CSV\_UseAnalysis\MasterCSV\All\_Glyco\mgf\ptm\UC18ERLIC\_PTM\_35D.mgf

Click mouse within plot area to zoom in by factor of two about that point

Or, to Da

Label all possible matches Label matches used for scoring

Show Y-axis

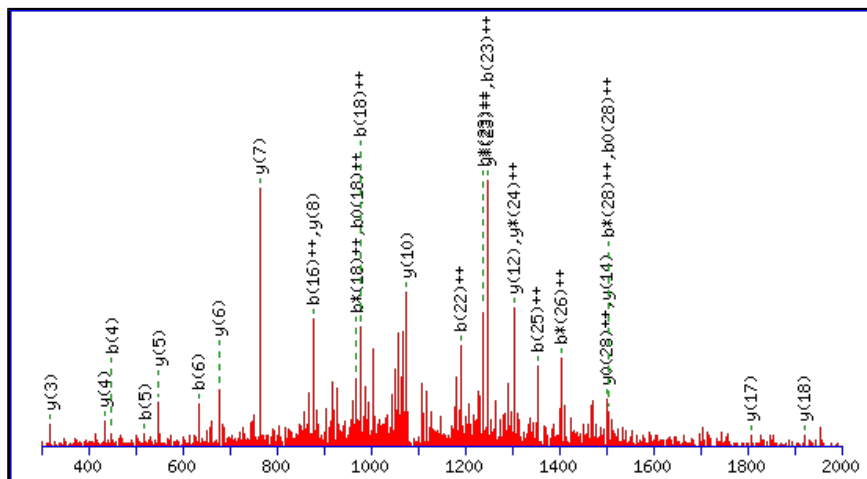

Monoisotopic mass of neutral peptide Mr(calc): 3254.5592

Fixed modifications: Carbamidomethyl (C) (apply to specified residues or termini only)

Variable modifications:

N6 : Deamidated (NQ)

Ions Score: 66 Expect: 6.8e-005

Matches : 28/324 fragment ions using 34 most intense peaks ([help](#))

| #  | b               | b <sup>++</sup>  | b <sup>*</sup> | b <sup>*++</sup> | b <sup>0</sup> | b <sup>0++</sup> | Seq. | y                | y <sup>++</sup> | y <sup>*</sup> | y <sup>*++</sup> | y <sup>0</sup> | y <sup>0++</sup> | #  |
|----|-----------------|------------------|----------------|------------------|----------------|------------------|------|------------------|-----------------|----------------|------------------|----------------|------------------|----|
| 1  | 164.0706        | 82.5389          |                |                  |                |                  | Y    |                  |                 |                |                  |                |                  | 30 |
| 2  | 235.1077        | 118.0575         |                |                  |                |                  | A    | 3092.5032        | 1546.7552       | 3075.4766      | 1538.2420        | 3074.4926      | 1537.7499        | 29 |
| 3  | 292.1292        | 146.5682         |                |                  |                |                  | G    | 3021.4661        | 1511.2367       | 3004.4395      | 1502.7234        | 3003.4555      | 1502.2314        | 28 |
| 4  | <b>448.2303</b> | 224.6188         | 431.2037       | 216.1055         |                |                  | R    | 2964.4446        | 1482.7259       | 2947.4181      | 1474.2127        | 2946.4340      | 1473.7207        | 27 |
| 5  | <b>519.2674</b> | 260.1373         | 502.2409       | 251.6241         |                |                  | A    | 2808.3435        | 1404.6754       | 2791.3169      | 1396.1621        | 2790.3329      | 1395.6701        | 26 |
| 6  | <b>634.2944</b> | 317.6508         | 617.2678       | 309.1375         |                |                  | N    | 2737.3064        | 1369.1568       | 2720.2798      | 1360.6436        | 2719.2958      | 1360.1515        | 25 |
| 7  | 747.3784        | 374.1928         | 730.3519       | 365.6796         |                |                  | L    | 2622.2794        | 1311.6434       | 2605.2529      | <b>1303.1301</b> | 2604.2689      | 1302.6381        | 24 |
| 8  | 848.4261        | 424.7167         | 831.3995       | 416.2034         | 830.4155       | 415.7114         | T    | 2509.1954        | 1255.1013       | 2492.1688      | <b>1246.5880</b> | 2491.1848      | 1246.0960        | 23 |
| 9  | 962.4690        | 481.7381         | 945.4425       | 473.2249         | 944.4585       | 472.7329         | N    | 2408.1477        | 1204.5775       | 2391.1211      | 1196.0642        | 2390.1371      | 1195.5722        | 22 |
| 10 | 1109.5374       | 555.2724         | 1092.5109      | 546.7591         | 1091.5269      | 546.2671         | F    | 2294.1048        | 1147.5560       | 2277.0782      | 1139.0427        | 2276.0942      | 1138.5507        | 21 |
| 11 | 1206.5902       | 603.7987         | 1189.5637      | 595.2855         | 1188.5796      | 594.7935         | P    | 2147.0364        | 1074.0218       | 2130.0098      | 1065.5085        | 2129.0258      | 1065.0165        | 20 |
| 12 | 1335.6328       | 668.3200         | 1318.6062      | 659.8068         | 1317.6222      | 659.3148         | E    | 2049.9836        | 1025.4954       | 2032.9570      | 1016.9822        | 2031.9730      | 1016.4901        | 19 |
| 13 | 1449.6757       | 725.3415         | 1432.6492      | 716.8282         | 1431.6652      | 716.3362         | N    | <b>1920.9410</b> | 960.9741        | 1903.9144      | 952.4609         | 1902.9304      | 951.9689         | 18 |
| 14 | 1506.6972       | 753.8522         | 1489.6706      | 745.3390         | 1488.6866      | 744.8469         | G    | <b>1806.8981</b> | 903.9527        | 1789.8715      | 895.4394         | 1788.8875      | 894.9474         | 17 |
| 15 | 1607.7449       | 804.3761         | 1590.7183      | 795.8628         | 1589.7343      | 795.3708         | T    | 1749.8766        | 875.4419        | 1732.8501      | 866.9287         | 1731.8660      | 866.4367         | 16 |
| 16 | 1754.8133       | <b>877.9103</b>  | 1737.7867      | 869.3970         | 1736.8027      | 868.9050         | F    | 1648.8289        | 824.9181        | 1631.8024      | 816.4048         | 1630.8184      | 815.9128         | 15 |
| 17 | 1853.8817       | 927.4445         | 1836.8551      | 918.9312         | 1835.8711      | 918.4392         | V    | <b>1501.7605</b> | 751.3839        | 1484.7340      | 742.8706         | 1483.7499      | 742.3786         | 14 |
| 18 | 1952.9501       | <b>976.9787</b>  | 1935.9236      | <b>968.4654</b>  | 1934.9395      | <b>967.9734</b>  | V    | 1402.6921        | 701.8497        | 1385.6655      | 693.3364         | 1384.6815      | 692.8444         | 13 |
| 19 | 2066.9930       | 1034.0002        | 2049.9665      | 1025.4869        | 2048.9825      | 1024.9949        | N    | <b>1303.6237</b> | 652.3155        | 1286.5971      | 643.8022         | 1285.6131      | 643.3102         | 12 |
| 20 | 2180.0771       | 1090.5422        | 2163.0505      | 1082.0289        | 2162.0665      | 1081.5369        | I    | 1189.5808        | 595.2940        | 1172.5542      | 586.7807         | 1171.5702      | 586.2887         | 11 |
| 21 | 2251.1142       | 1126.0607        | 2234.0877      | 1117.5475        | 2233.1036      | 1117.0555        | A    | <b>1076.4967</b> | 538.7520        | 1059.4701      | 530.2387         | 1058.4861      | 529.7467         | 10 |
| 22 | 2379.1728       | <b>1190.0900</b> | 2362.1462      | 1181.5768        | 2361.1622      | 1181.0847        | Q    | 1005.4596        | 503.2334        | 988.4330       | 494.7202         | 987.4490       | 494.2281         | 9  |
| 23 | 2492.2569       | <b>1246.6321</b> | 2475.2303      | <b>1238.1188</b> | 2474.2463      | 1237.6268        | L    | <b>877.4010</b>  | 439.2041        | 860.3745       | 430.6909         | 859.3904       | 430.1989         | 8  |

|    |           |           |           |           |           |           |   |          |          |          |          |          |          |   |
|----|-----------|-----------|-----------|-----------|-----------|-----------|---|----------|----------|----------|----------|----------|----------|---|
| 24 | 2579.2889 | 1290.1481 | 2562.2623 | 1281.6348 | 2561.2783 | 1281.1428 | S | 764.3169 | 382.6621 | 747.2904 | 374.1488 | 746.3064 | 373.6568 | 7 |
| 25 | 2707.3475 | 1354.1774 | 2690.3209 | 1345.6641 | 2689.3369 | 1345.1721 | Q | 677.2849 | 339.1461 | 660.2584 | 330.6328 | 659.2743 | 330.1408 | 6 |
| 26 | 2822.3744 | 1411.6908 | 2805.3479 | 1403.1776 | 2804.3638 | 1402.6856 | D | 549.2263 | 275.1168 | 532.1998 | 266.6035 | 531.2158 | 266.1115 | 5 |
| 27 | 2937.4013 | 1469.2043 | 2920.3748 | 1460.6910 | 2919.3908 | 1460.1990 | D | 434.1994 | 217.6033 | 417.1728 | 209.0901 | 416.1888 | 208.5980 | 4 |
| 28 | 3024.4334 | 1512.7203 | 3007.4068 | 1504.2070 | 3006.4228 | 1503.7150 | S | 319.1724 | 160.0899 | 302.1459 | 151.5766 | 301.1619 | 151.0846 | 3 |
| 29 | 3081.4548 | 1541.2311 | 3064.4283 | 1532.7178 | 3063.4443 | 1532.2258 | G | 232.1404 | 116.5738 | 215.1139 | 108.0606 |          |          | 2 |
| 30 |           |           |           |           |           |           | R | 175.1190 | 88.0631  | 158.0924 | 79.5498  |          |          | 1 |

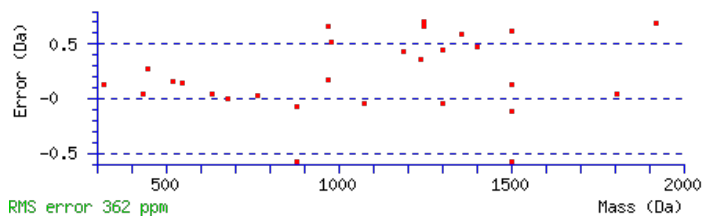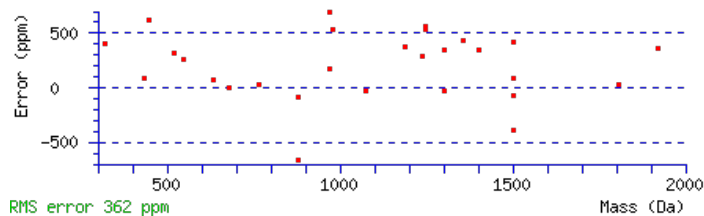

NCBI BLAST search of [YAGRANLTNFPENGTFVVNIAQLSQDDSGR](#)

(Parameters: blastp, nr protein database, expect=20000, no filter, PAM30)

Other BLAST [web gateways](#)

All matches to this query

| Score | Mr(calc)  | Delta  | Sequence                                       | Site Analysis         |
|-------|-----------|--------|------------------------------------------------|-----------------------|
| 66.0  | 3254.5592 | 2.0090 | <a href="#">YAGRANLTNFPENGTFVVNIAQLSQDDSGR</a> | Deamidated N6 47.08%  |
| 63.6  | 3254.5592 | 2.0090 | <a href="#">YAGRANLTNFPENGTFVVNIAQLSQDDSGR</a> | Deamidated N9 27.16%  |
| 63.3  | 3254.5592 | 2.0090 | <a href="#">YAGRANLTNFPENGTFVVNIAQLSQDDSGR</a> | Deamidated N13 25.40% |
| 41.8  | 3254.5592 | 2.0090 | <a href="#">YAGRANLTNFPENGTFVVNIAQLSQDDSGR</a> | Deamidated N19 0.18%  |
| 41.6  | 3254.5592 | 2.0090 | <a href="#">YAGRANLTNFPENGTFVVNIAQLSQDDSGR</a> | Deamidated Q22 0.17%  |
| 22.5  | 3254.5592 | 2.0090 | <a href="#">YAGRANLTNFPENGTFVVNIAQLSQDDSGR</a> | Deamidated Q25 0.00%  |
| 9.4   | 3254.5765 | 1.9917 | <a href="#">AMDKGDPLTGETLVVVNVSDINDNPPEER</a>  |                       |
| 5.4   | 3254.5594 | 2.0089 | <a href="#">QQNVKSAHRAHCLSMNEELIQGVATMLR</a>   |                       |
| 5.4   | 3254.5594 | 2.0089 | <a href="#">QQNVKSAHRAHCLSMNEELIQGVATMLR</a>   |                       |
| 5.4   | 3254.5594 | 2.0089 | <a href="#">QQNVKSAHRAHCLSMNEELIQGVATMLR</a>   |                       |

Mascot: <http://www.matrixscience.com/>

# MATRIX SCIENCE Mascot Search Results

## Peptide View

MS/MS Fragmentation of **ANLTNFPENGTFVVNIAQLSQDDSGR**

Found in **P01833** in **con\_Xuniprot\_HUMAN3**, PIGR\_HUMAN Polymeric immunoglobulin receptor OS=Homo sapiens GN=PIGR PE=1 SV=4

Match to Query 25608: 2808.331812 from(937.117880,3+) intensity(22292.9648) rtinseconds(2317) scans(6067) index(6616)

Title: 111019\_Est\_ISCardio\_NMI\_YP\_G\_9Spectrum5347\_scans\_\_6067

Data file C:\mascot\20140703\_Tmgf\_1D\CSV\_UseAnalysis\MasterCSV\All\_Glyco\mgf\ptm\UC18ERLIC\_PTM\_35D.mgf

Click mouse within plot area to zoom in by factor of two about that point

Or, to Da

Label all possible matches Label matches used for scoring

Show Y-axis

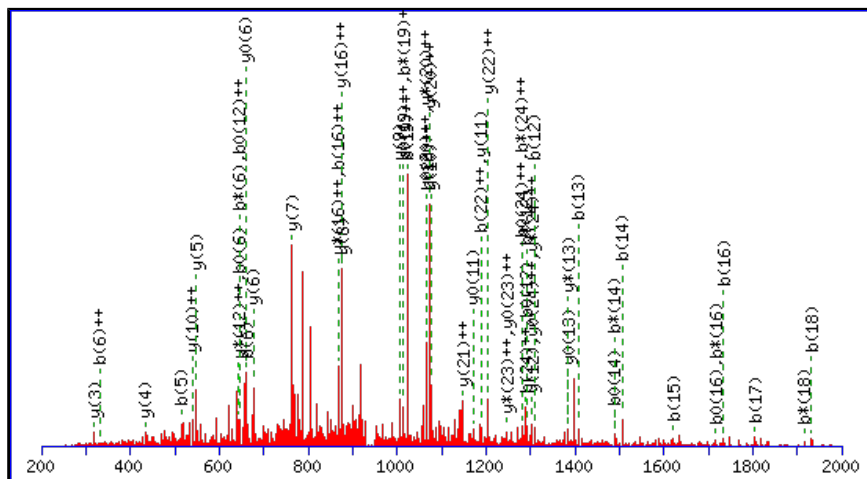

Monoisotopic mass of neutral peptide Mr(calc): 2808.3202

Fixed modifications: Carbamidomethyl (C) (apply to specified residues or termini only)

Variable modifications:

N5 : Deamidated (NQ)

N9 : Deamidated (NQ)

Ions Score: 43 Expect: 0.014

Matches : 56/288 fragment ions using 89 most intense peaks ([help](#))

| #  | b         | b <sup>++</sup> | b <sup>*</sup> | b <sup>*++</sup> | b <sup>0</sup> | b <sup>0++</sup> | Seq. | y         | y <sup>++</sup> | y <sup>*</sup> | y <sup>*++</sup> | y <sup>0</sup> | y <sup>0++</sup> | #  |
|----|-----------|-----------------|----------------|------------------|----------------|------------------|------|-----------|-----------------|----------------|------------------|----------------|------------------|----|
| 1  | 72.0444   | 36.5258         |                |                  |                |                  | A    |           |                 |                |                  |                |                  | 26 |
| 2  | 186.0873  | 93.5473         | 169.0608       | 85.0340          |                |                  | N    | 2738.2904 | 1369.6488       | 2721.2638      | 1361.1356        | 2720.2798      | 1360.6436        | 25 |
| 3  | 299.1714  | 150.0893        | 282.1448       | 141.5761         |                |                  | L    | 2624.2475 | 1312.6274       | 2607.2209      | 1304.1141        | 2606.2369      | 1303.6221        | 24 |
| 4  | 400.2191  | 200.6132        | 383.1925       | 192.0999         | 382.2085       | 191.6079         | T    | 2511.1634 | 1256.0853       | 2494.1369      | 1247.5721        | 2493.1528      | 1247.0801        | 23 |
| 5  | 515.2460  | 258.1266        | 498.2195       | 249.6134         | 497.2354       | 249.1214         | N    | 2410.1157 | 1205.5615       | 2393.0892      | 1197.0482        | 2392.1052      | 1196.5562        | 22 |
| 6  | 662.3144  | 331.6608        | 645.2879       | 323.1476         | 644.3039       | 322.6556         | F    | 2295.0888 | 1148.0480       | 2278.0622      | 1139.5348        | 2277.0782      | 1139.0427        | 21 |
| 7  | 759.3672  | 380.1872        | 742.3406       | 371.6740         | 741.3566       | 371.1819         | P    | 2148.0204 | 1074.5138       | 2130.9938      | 1066.0005        | 2130.0098      | 1065.5085        | 20 |
| 8  | 888.4098  | 444.7085        | 871.3832       | 436.1953         | 870.3992       | 435.7032         | E    | 2050.9676 | 1025.9874       | 2033.9411      | 1017.4742        | 2032.9570      | 1016.9822        | 19 |
| 9  | 1003.4367 | 502.2220        | 986.4102       | 493.7087         | 985.4262       | 493.2167         | N    | 1921.9250 | 961.4661        | 1904.8985      | 952.9529         | 1903.9144      | 952.4609         | 18 |
| 10 | 1060.4582 | 530.7327        | 1043.4316      | 522.2195         | 1042.4476      | 521.7274         | G    | 1806.8981 | 903.9527        | 1789.8715      | 895.4394         | 1788.8875      | 894.9474         | 17 |
| 11 | 1161.5059 | 581.2566        | 1144.4793      | 572.7433         | 1143.4953      | 572.2513         | T    | 1749.8766 | 875.4419        | 1732.8501      | 866.9287         | 1731.8660      | 866.4367         | 16 |
| 12 | 1308.5743 | 654.7908        | 1291.5477      | 646.2775         | 1290.5637      | 645.7855         | F    | 1648.8289 | 824.9181        | 1631.8024      | 816.4048         | 1630.8184      | 815.9128         | 15 |
| 13 | 1407.6427 | 704.3250        | 1390.6161      | 695.8117         | 1389.6321      | 695.3197         | V    | 1501.7605 | 751.3839        | 1484.7340      | 742.8706         | 1483.7499      | 742.3786         | 14 |
| 14 | 1506.7111 | 753.8592        | 1489.6846      | 745.3459         | 1488.7005      | 744.8539         | V    | 1402.6921 | 701.8497        | 1385.6655      | 693.3364         | 1384.6815      | 692.8444         | 13 |
| 15 | 1620.7540 | 810.8807        | 1603.7275      | 802.3674         | 1602.7435      | 801.8754         | N    | 1303.6237 | 652.3155        | 1286.5971      | 643.8022         | 1285.6131      | 643.3102         | 12 |
| 16 | 1733.8381 | 867.4227        | 1716.8115      | 858.9094         | 1715.8275      | 858.4174         | I    | 1189.5808 | 595.2940        | 1172.5542      | 586.7807         | 1171.5702      | 586.2887         | 11 |
| 17 | 1804.8752 | 902.9412        | 1787.8487      | 894.4280         | 1786.8646      | 893.9360         | A    | 1076.4967 | 538.7520        | 1059.4701      | 530.2387         | 1058.4861      | 529.7467         | 10 |
| 18 | 1932.9338 | 966.9705        | 1915.9072      | 958.4573         | 1914.9232      | 957.9652         | Q    | 1005.4596 | 503.2334        | 988.4330       | 494.7202         | 987.4490       | 494.2281         | 9  |
| 19 | 2046.0178 | 1023.5126       | 2028.9913      | 1014.9993        | 2028.0073      | 1014.5073        | L    | 877.4010  | 439.2041        | 860.3745       | 430.6909         | 859.3904       | 430.1989         | 8  |
| 20 | 2133.0499 | 1067.0286       | 2116.0233      | 1058.5153        | 2115.0393      | 1058.0233        | S    | 764.3169  | 382.6621        | 747.2904       | 374.1488         | 746.3064       | 373.6568         | 7  |
| 21 | 2261.1085 | 1131.0579       | 2244.0819      | 1122.5446        | 2243.0979      | 1122.0526        | Q    | 677.2849  | 339.1461        | 660.2584       | 330.6328         | 659.2743       | 330.1408         | 6  |
| 22 | 2376.1354 | 1188.5713       | 2359.1088      | 1180.0581        | 2358.1248      | 1179.5661        | D    | 549.2263  | 275.1168        | 532.1998       | 266.6035         | 531.2158       | 266.1115         | 5  |

|    |           |           |           |           |           |           |   |          |          |          |          |          |          |   |
|----|-----------|-----------|-----------|-----------|-----------|-----------|---|----------|----------|----------|----------|----------|----------|---|
| 23 | 2491.1623 | 1246.0848 | 2474.1358 | 1237.5715 | 2473.1518 | 1237.0795 | D | 434.1994 | 217.6033 | 417.1728 | 209.0901 | 416.1888 | 208.5980 | 4 |
| 24 | 2578.1944 | 1289.6008 | 2561.1678 | 1281.0875 | 2560.1838 | 1280.5955 | S | 319.1724 | 160.0899 | 302.1459 | 151.5766 | 301.1619 | 151.0846 | 3 |
| 25 | 2635.2158 | 1318.1116 | 2618.1893 | 1309.5983 | 2617.2053 | 1309.1063 | G | 232.1404 | 116.5738 | 215.1139 | 108.0606 |          |          | 2 |
| 26 |           |           |           |           |           |           | R | 175.1190 | 88.0631  | 158.0924 | 79.5498  |          |          | 1 |

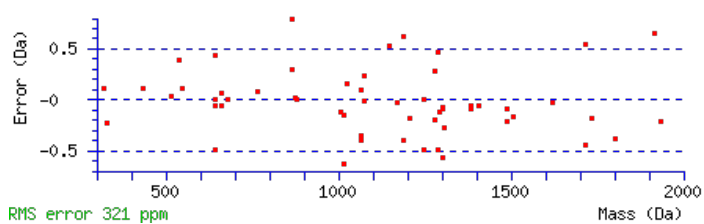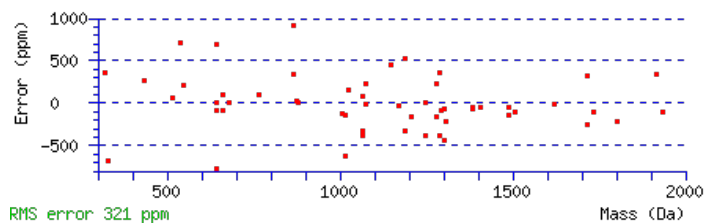

NCBI BLAST search of [ANLTFPENGTFVVNIAQLSQDDSGR](#)

(Parameters: blastp, nr protein database, expect=20000, no filter, PAM30)

Other BLAST [web gateways](#)

All matches to this query

| Score | Mr(calc)  | Delta  | Sequence                                  | Site Analysis            |
|-------|-----------|--------|-------------------------------------------|--------------------------|
| 42.5  | 2808.3202 | 0.0116 | <a href="#">ANLTFPENGTFVVNIAQLSQDDSGR</a> | Deamidated N5, N9 42.87% |
| 42.5  | 2808.3202 | 0.0116 | <a href="#">ANLTFPENGTFVVNIAQLSQDDSGR</a> | Deamidated N2, N9 42.87% |
| 34.3  | 2808.3202 | 0.0116 | <a href="#">ANLTFPENGTFVVNIAQLSQDDSGR</a> | Deamidated N2, N5 6.46%  |
| 29.0  | 2808.3202 | 0.0116 | <a href="#">ANLTFPENGTFVVNIAQLSQDDSGR</a> | Deamidated N5, N15 1.93% |
| 29.0  | 2808.3202 | 0.0116 | <a href="#">ANLTFPENGTFVVNIAQLSQDDSGR</a> | Deamidated N2, N15 1.93% |
| 28.5  | 2807.3362 | 0.9956 | <a href="#">ANLTFPENGTFVVNIAQLSQDDSGR</a> |                          |
| 26.7  | 2808.3202 | 0.0116 | <a href="#">ANLTFPENGTFVVNIAQLSQDDSGR</a> | Deamidated N9, N15 1.13% |
| 25.7  | 2807.3362 | 0.9956 | <a href="#">ANLTFPENGTFVVNIAQLSQDDSGR</a> |                          |
| 22.6  | 2807.3362 | 0.9956 | <a href="#">ANLTFPENGTFVVNIAQLSQDDSGR</a> |                          |
| 22.1  | 2807.3362 | 0.9956 | <a href="#">ANLTFPENGTFVVNIAQLSQDDSGR</a> |                          |

Mascot: <http://www.matrixscience.com/>

# MASCOT SCIENCE Mascot Search Results

## Peptide View

MS/MS Fragmentation of **EEQYNSTYR**

Found in **P01857** in **con\_Xuniprot\_HUMAN3**, IGHG1\_HUMAN Ig gamma-1 chain C region OS=Homo sapiens GN=IGHG1 PE=1 SV=1

Match to Query 1624: 1189.491228 from(595.752890,2+) intensity(3555.3958) rtinseconds(269) scans(439) index(2454)

Title: 111019\_Est\_ISCardio\_NMI\_YP\_G\_5Spectrum345\_scans\_439

Data file C:\\mascot\\20140703\_Tmgf\_1D\\CSV\_UseAnalysis\\MasterCSV\\All\_Glyco\\mgf\\ptm\\UC18ERLIC\_PTM\_35D.mgf

Click mouse within plot area to zoom in by factor of two about that point

Or,  to  Da

Label all possible matches  Label matches used for scoring

Show Y-axis

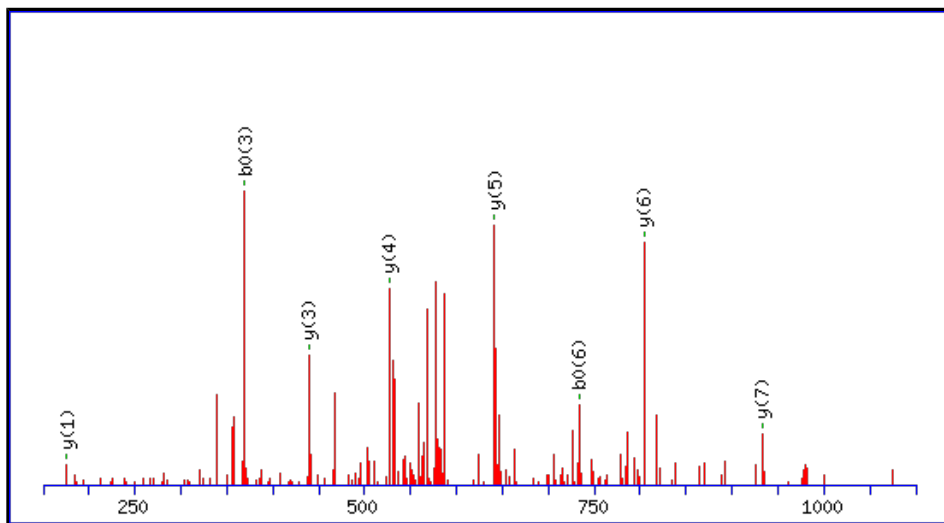

Monoisotopic mass of neutral peptide Mr(calc): 1189.4887

Fixed modifications: Carbamidomethyl (C) (apply to specified residues or termini only)

Variable modifications:

N5 : Deamidated (NQ)

Ions Score: 43 Expect: 0.0012

Matches : 8/88 fragment ions using 9 most intense peaks ([help](#))

| # | b         | b <sup>++</sup> | b*       | b <sup>+++</sup> | b <sup>0</sup> | b <sup>0++</sup> | Seq. | y         | y <sup>++</sup> | y*        | y <sup>+++</sup> | y <sup>0</sup> | y <sup>0++</sup> | # |
|---|-----------|-----------------|----------|------------------|----------------|------------------|------|-----------|-----------------|-----------|------------------|----------------|------------------|---|
| 1 | 130.0499  | 65.5286         |          |                  | 112.0393       | 56.5233          | E    |           |                 |           |                  |                |                  | 9 |
| 2 | 259.0925  | 130.0499        |          |                  | 241.0819       | 121.0446         | E    | 1061.4534 | 531.2304        | 1044.4269 | 522.7171         | 1043.4429      | 522.2251         | 8 |
| 3 | 387.1510  | 194.0792        | 370.1245 | 185.5659         | 369.1405       | 185.0739         | Q    | 932.4108  | 466.7091        | 915.3843  | 458.1958         | 914.4003       | 457.7038         | 7 |
| 4 | 550.2144  | 275.6108        | 533.1878 | 267.0975         | 532.2038       | 266.6055         | Y    | 804.3523  | 402.6798        | 787.3257  | 394.1665         | 786.3417       | 393.6745         | 6 |
| 5 | 665.2413  | 333.1243        | 648.2148 | 324.6110         | 647.2307       | 324.1190         | N    | 641.2889  | 321.1481        | 624.2624  | 312.6348         | 623.2784       | 312.1428         | 5 |
| 6 | 752.2733  | 376.6403        | 735.2468 | 368.1270         | 734.2628       | 367.6350         | S    | 526.2620  | 263.6346        | 509.2354  | 255.1214         | 508.2514       | 254.6293         | 4 |
| 7 | 853.3210  | 427.1641        | 836.2945 | 418.6509         | 835.3105       | 418.1589         | T    | 439.2300  | 220.1186        | 422.2034  | 211.6053         | 421.2194       | 211.1133         | 3 |
| 8 | 1016.3843 | 508.6958        | 999.3578 | 500.1825         | 998.3738       | 499.6905         | Y    | 338.1823  | 169.5948        | 321.1557  | 161.0815         |                |                  | 2 |
| 9 |           |                 |          |                  |                |                  | R    | 175.1190  | 88.0631         | 158.0924  | 79.5498          |                |                  | 1 |

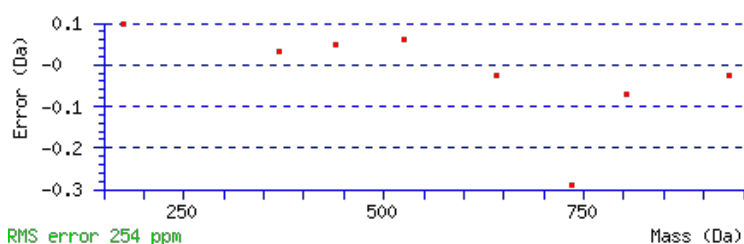

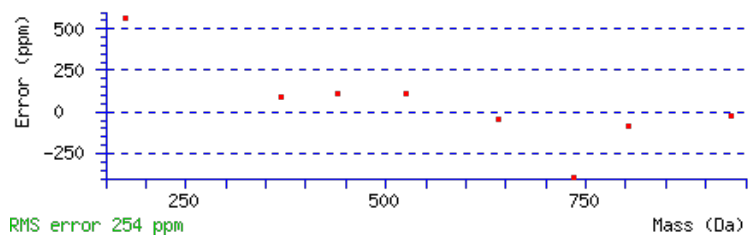

NCBI **BLAST** search of [EEQYNSTYR](#)

(Parameters: blastp, nr protein database, expect=20000, no filter, PAM30)

Other BLAST [web gateways](#)

**All matches to this query**

| Score | Mr(calc)  | Delta   | Sequence                    | Site Analysis        |
|-------|-----------|---------|-----------------------------|----------------------|
| 43.3  | 1189.4887 | 0.0025  | <a href="#">EEQYNSTYR</a>   | Deamidated N5 99.90% |
| 13.4  | 1189.4887 | 0.0025  | <a href="#">EEQYNSTYR</a>   | Deamidated Q3 0.10%  |
| 3.9   | 1189.4856 | 0.0056  | <a href="#">QPDGCM DPVR</a> |                      |
| 0.3   | 1189.4930 | -0.0017 | <a href="#">ENKCMAMYK</a>   |                      |

Mascot: <http://www.matrixscience.com/>

# MASCOT SCIENCE Mascot Search Results

## Peptide View

MS/MS Fragmentation of **EEQFNSTFR**

Found in **P01859** in **con\_Xuniprot\_HUMAN3**, IGHG2\_HUMAN Ig gamma-2 chain C region OS=Homo sapiens GN=IGHG2 PE=1 SV=2

Match to Query 1602: 1157.504308 from(579.759430,2+) intensity(236788.6719) rtinseconds(653) scans(1540) index(23802)

Title: 111019\_Est\_MI\_YS\_G\_05Spectrum1294\_scans\_\_1540

Data file C:\\mascot\\20140703\_Tmgf\_1D\\CSV\_UseAnalysis\\MasterCSV\\All\_Glyco\\mgf\\ptm\\UC18ERLIC\_PTM\_35D.mgf

Click mouse within plot area to zoom in by factor of two about that point

Or, to Da

Label all possible matches Label matches used for scoring

Show Y-axis

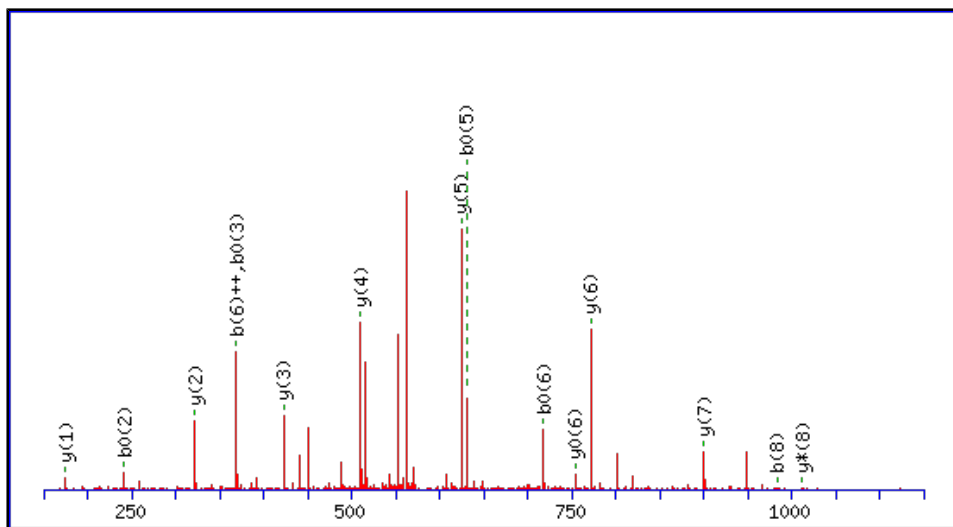

Monoisotopic mass of neutral peptide **Mr(calc)**: 1157.4989

Fixed modifications: Carbamidomethyl (C) (apply to specified residues or termini only)

Variable modifications:

N5 : Deamidated (NQ)

Ions Score: 44 Expect: 0.0019

Matches : 15/88 fragment ions using 19 most intense peaks ([help](#))

| # | b        | b <sup>++</sup> | b*       | b <sup>*++</sup> | b <sup>0</sup> | b <sup>0++</sup> | Seq. | y         | y <sup>++</sup> | y*        | y <sup>*++</sup> | y <sup>0</sup> | y <sup>0++</sup> | # |
|---|----------|-----------------|----------|------------------|----------------|------------------|------|-----------|-----------------|-----------|------------------|----------------|------------------|---|
| 1 | 130.0499 | 65.5286         |          |                  | 112.0393       | 56.5233          | E    |           |                 |           |                  |                |                  | 9 |
| 2 | 259.0925 | 130.0499        |          |                  | 241.0819       | 121.0446         | E    | 1029.4636 | 515.2354        | 1012.4371 | 506.7222         | 1011.4530      | 506.2302         | 8 |
| 3 | 387.1510 | 194.0792        | 370.1245 | 185.5659         | 369.1405       | 185.0739         | Q    | 900.4210  | 450.7141        | 883.3945  | 442.2009         | 882.4104       | 441.7089         | 7 |
| 4 | 534.2195 | 267.6134        | 517.1929 | 259.1001         | 516.2089       | 258.6081         | F    | 772.3624  | 386.6849        | 755.3359  | 378.1716         | 754.3519       | 377.6796         | 6 |
| 5 | 649.2464 | 325.1268        | 632.2198 | 316.6136         | 631.2358       | 316.1216         | N    | 625.2940  | 313.1506        | 608.2675  | 304.6374         | 607.2835       | 304.1454         | 5 |
| 6 | 736.2784 | 368.6429        | 719.2519 | 360.1296         | 718.2679       | 359.6376         | S    | 510.2671  | 255.6372        | 493.2405  | 247.1239         | 492.2565       | 246.6319         | 4 |
| 7 | 837.3261 | 419.1667        | 820.2996 | 410.6534         | 819.3155       | 410.1614         | T    | 423.2350  | 212.1212        | 406.2085  | 203.6079         | 405.2245       | 203.1159         | 3 |
| 8 | 984.3945 | 492.7009        | 967.3680 | 484.1876         | 966.3840       | 483.6956         | F    | 322.1874  | 161.5973        | 305.1608  | 153.0840         |                |                  | 2 |
| 9 |          |                 |          |                  |                |                  | R    | 175.1190  | 88.0631         | 158.0924  | 79.5498          |                |                  | 1 |

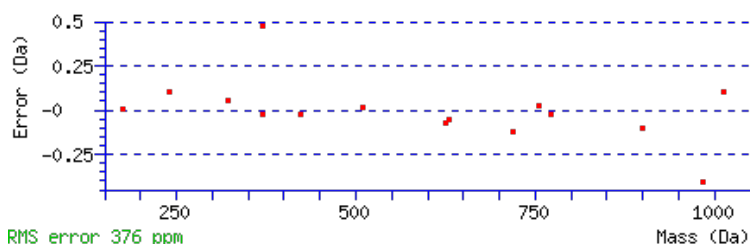



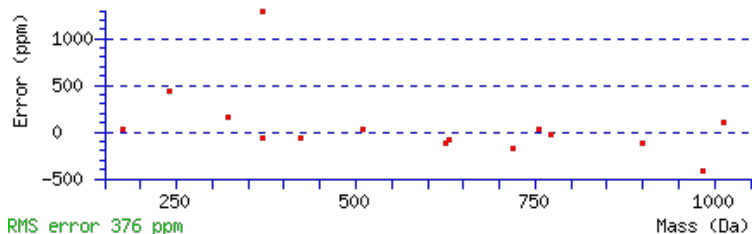

NCBI BLAST search of [EEQFNSTER](#)

(Parameters: blastp, nr protein database, expect=20000, no filter, PAM30)

Other BLAST [web gateways](#)

All matches to this query

| Score | Mr(calc)  | Delta   | Sequence                       | Site Analysis        |
|-------|-----------|---------|--------------------------------|----------------------|
| 44.5  | 1157.4989 | 0.0054  | <a href="#">EEQFNSTER</a>      | Deamidated N5 99.58% |
| 20.7  | 1157.4989 | 0.0054  | <a href="#">EEQFNSTER</a>      | Deamidated Q3 0.42%  |
| 20.1  | 1156.5039 | 1.0004  | <a href="#">GSLKMGNMMR</a>     |                      |
| 13.1  | 1156.5039 | 1.0004  | <a href="#">GSLKMGNMMR</a>     |                      |
| 10.7  | 1157.5061 | -0.0018 | <a href="#">EEAGPGGAGGGGSR</a> |                      |
| 10.0  | 1157.5101 | -0.0058 | <a href="#">EPNWSSAPDR</a>     |                      |
| 7.6   | 1157.5023 | 0.0021  | <a href="#">SSREQFMQK</a>      |                      |
| 6.2   | 1155.4979 | 2.0064  | <a href="#">SSFQVGGGCTR</a>    |                      |
| 5.6   | 1156.5039 | 1.0004  | <a href="#">GSLKMGNMMR</a>     |                      |
| 5.4   | 1155.4978 | 2.0065  | <a href="#">NRYPDMSTR</a>      |                      |

Mascot: <http://www.matrixscience.com/>

# MASCOT SCIENCE Mascot Search Results

## Peptide View

MS/MS Fragmentation of **EEQYNSTFR**

Found in **P01860** in **con\_Xuniprot\_HUMAN3**, IGHG3\_HUMAN Ig gamma-3 chain C region OS=Homo sapiens GN=IGHG3 PE=1 SV=2

Match to Query 1613: 1173.495288 from(587.754920,2+) intensity(30158.2148) rtinseconds(461) scans(873) index(15589)

Title: 111019\_Est\_MI\_YP\_G\_05Spectrum718\_scans\_\_873

Data file C:\\mascot\\20140703\_Tmgf\_1D\\CSV\_UseAnalysis\\MasterCSV\\All\_Glyco\\mgf\\ptm\\UC18ERLIC\_PTM\_35D.mgf

Click mouse within plot area to zoom in by factor of two about that point

Or, to Da

Label all possible matches Label matches used for scoring

Show Y-axis

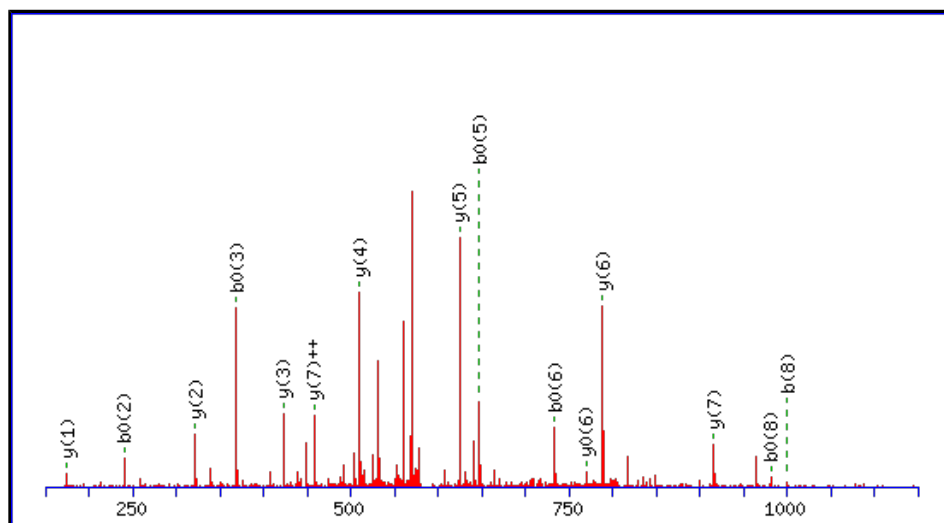

Monoisotopic mass of neutral peptide Mr(calc): 1173.4938

Fixed modifications: Carbamidomethyl (C) (apply to specified residues or termini only)

Variable modifications:

N5 : Deamidated (NQ)

Ions Score: 38 Expect: 0.0062

Matches : 15/88 fragment ions using 20 most intense peaks ([help](#))

| # | b         | b <sup>++</sup> | b*       | b <sup>+++</sup> | b <sup>0</sup> | b <sup>0++</sup> | Seq. | y         | y <sup>++</sup> | y*        | y <sup>+++</sup> | y <sup>0</sup> | y <sup>0++</sup> | # |
|---|-----------|-----------------|----------|------------------|----------------|------------------|------|-----------|-----------------|-----------|------------------|----------------|------------------|---|
| 1 | 130.0499  | 65.5286         |          |                  | 112.0393       | 56.5233          | E    |           |                 |           |                  |                |                  | 9 |
| 2 | 259.0925  | 130.0499        |          |                  | 241.0819       | 121.0446         | E    | 1045.4585 | 523.2329        | 1028.4320 | 514.7196         | 1027.4480      | 514.2276         | 8 |
| 3 | 387.1510  | 194.0792        | 370.1245 | 185.5659         | 369.1405       | 185.0739         | Q    | 916.4159  | 458.7116        | 899.3894  | 450.1983         | 898.4054       | 449.7063         | 7 |
| 4 | 550.2144  | 275.6108        | 533.1878 | 267.0975         | 532.2038       | 266.6055         | Y    | 788.3573  | 394.6823        | 771.3308  | 386.1690         | 770.3468       | 385.6770         | 6 |
| 5 | 665.2413  | 333.1243        | 648.2148 | 324.6110         | 647.2307       | 324.1190         | N    | 625.2940  | 313.1506        | 608.2675  | 304.6374         | 607.2835       | 304.1454         | 5 |
| 6 | 752.2733  | 376.6403        | 735.2468 | 368.1270         | 734.2628       | 367.6350         | S    | 510.2671  | 255.6372        | 493.2405  | 247.1239         | 492.2565       | 246.6319         | 4 |
| 7 | 853.3210  | 427.1641        | 836.2945 | 418.6509         | 835.3105       | 418.1589         | T    | 423.2350  | 212.1212        | 406.2085  | 203.6079         | 405.2245       | 203.1159         | 3 |
| 8 | 1000.3894 | 500.6984        | 983.3629 | 492.1851         | 982.3789       | 491.6931         | F    | 322.1874  | 161.5973        | 305.1608  | 153.0840         |                |                  | 2 |
| 9 |           |                 |          |                  |                |                  | R    | 175.1190  | 88.0631         | 158.0924  | 79.5498          |                |                  | 1 |

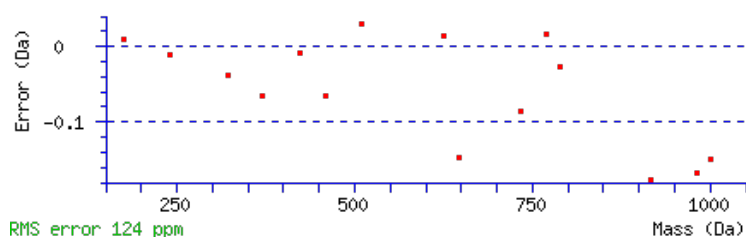

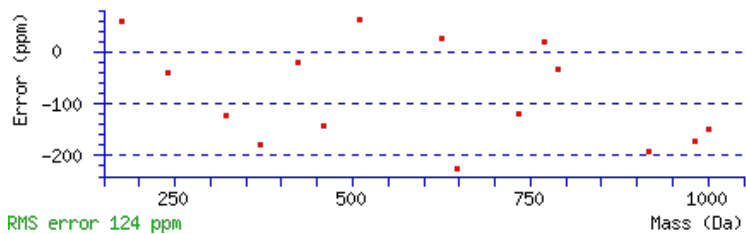

NCBI BLAST search of [EEQYNSTER](#)  
 (Parameters: blastp, nr protein database, expect=20000, no filter, PAM30)

Other BLAST [web gateways](#)

**All matches to this query**

| Score | Mr(calc)  | Delta   | Sequence                   | Site Analysis        |
|-------|-----------|---------|----------------------------|----------------------|
| 37.5  | 1173.4938 | 0.0015  | <a href="#">EEQYNSTER</a>  | Deamidated N5 99.58% |
| 13.8  | 1173.4938 | 0.0015  | <a href="#">EEQYNSTER</a>  | Deamidated Q3 0.42%  |
| 11.6  | 1173.4938 | 0.0015  | <a href="#">EEQFNSTYR</a>  |                      |
| 7.0   | 1173.4898 | 0.0055  | <a href="#">EQASTEHQSR</a> |                      |
| 5.4   | 1173.4907 | 0.0046  | <a href="#">DNHCMEVIR</a>  |                      |
| 3.8   | 1173.4906 | 0.0046  | <a href="#">EMYQRQMR</a>   |                      |
| 2.4   | 1173.4986 | -0.0033 | <a href="#">QSGQGPCHER</a> |                      |
| 2.4   | 1173.4986 | -0.0033 | <a href="#">QSGQGPCHER</a> |                      |

Mascot: <http://www.matrixscience.com/>

# MASCOT SCIENCE Mascot Search Results

## Peptide View

MS/MS Fragmentation of **EEQFNSTYR**

Found in **P01861** in **con\_Xuniprot\_HUMAN3**, IGHG4\_HUMAN Ig gamma-4 chain C region OS=Homo sapiens GN=IGHG4 PE=1 SV=1

Match to Query 1614: 1173.495308 from(587.754930,2+) intensity(4329.9058) rtinseconds(402) scans(737) index(1834)

Title: 111019\_Est\_ISCardio\_NMI\_YP\_G\_4Spectrum589\_scans\_737

Data file C:\\mascot\\20140703\_Tmgf\_1D\\CSV\_UseAnalysis\\MasterCSV\\All\_Glyco\\mgf\\ptm\\UC18ERLIC\_PTM\_35D.mgf

Click mouse within plot area to zoom in by factor of two about that point

Or, to Da

Label all possible matches Label matches used for scoring

Show Y-axis

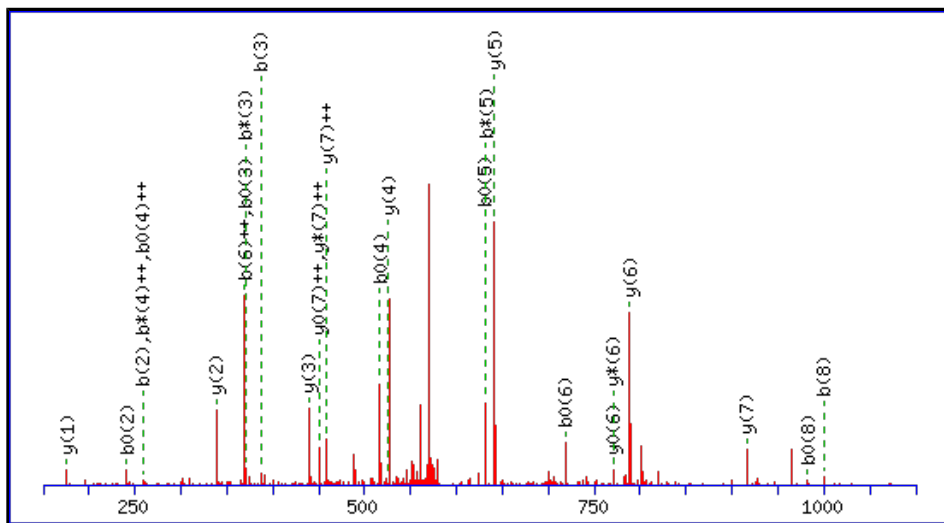

Monoisotopic mass of neutral peptide **Mr(calc)**: 1173.4938

**Fixed modifications:** Carbamidomethyl (C) (apply to specified residues or termini only)

**Variable modifications:**

N5 : Deamidated (NQ)

Ions Score: 45 **Expect**: 0.001

Matches : 26/88 fragment ions using 36 most intense peaks ([help](#))

| # | b                | b <sup>++</sup> | b*              | b <sup>+++</sup> | b <sup>0</sup>  | b <sup>0++</sup> | Seq. | y               | y <sup>++</sup> | y*              | y <sup>+++</sup> | y <sup>0</sup>  | y <sup>0++</sup> | # |
|---|------------------|-----------------|-----------------|------------------|-----------------|------------------|------|-----------------|-----------------|-----------------|------------------|-----------------|------------------|---|
| 1 | 130.0499         | 65.5286         |                 |                  | 112.0393        | 56.5233          | E    |                 |                 |                 |                  |                 |                  | 9 |
| 2 | <b>259.0925</b>  | 130.0499        |                 |                  | <b>241.0819</b> | 121.0446         | E    | 1045.4585       | 523.2329        | 1028.4320       | 514.7196         | 1027.4480       | 514.2276         | 8 |
| 3 | <b>387.1510</b>  | 194.0792        | <b>370.1245</b> | 185.5659         | <b>369.1405</b> | 185.0739         | Q    | <b>916.4159</b> | <b>458.7116</b> | 899.3894        | <b>450.1983</b>  | 898.4054        | <b>449.7063</b>  | 7 |
| 4 | 534.2195         | 267.6134        | 517.1929        | <b>259.1001</b>  | <b>516.2089</b> | <b>258.6081</b>  | F    | <b>788.3573</b> | 394.6823        | <b>771.3308</b> | 386.1690         | <b>770.3468</b> | 385.6770         | 6 |
| 5 | 649.2464         | 325.1268        | <b>632.2198</b> | 316.6136         | <b>631.2358</b> | 316.1216         | N    | <b>641.2889</b> | 321.1481        | 624.2624        | 312.6348         | 623.2784        | 312.1428         | 5 |
| 6 | 736.2784         | <b>368.6429</b> | 719.2519        | 360.1296         | <b>718.2679</b> | 359.6376         | S    | <b>526.2620</b> | 263.6346        | 509.2354        | 255.1214         | 508.2514        | 254.6293         | 4 |
| 7 | 837.3261         | 419.1667        | 820.2996        | 410.6534         | 819.3155        | 410.1614         | T    | <b>439.2300</b> | 220.1186        | 422.2034        | 211.6053         | 421.2194        | 211.1133         | 3 |
| 8 | <b>1000.3894</b> | 500.6984        | 983.3629        | 492.1851         | <b>982.3789</b> | 491.6931         | Y    | <b>338.1823</b> | 169.5948        | 321.1557        | 161.0815         |                 |                  | 2 |
| 9 |                  |                 |                 |                  |                 |                  | R    | <b>175.1190</b> | 88.0631         | 158.0924        | 79.5498          |                 |                  | 1 |

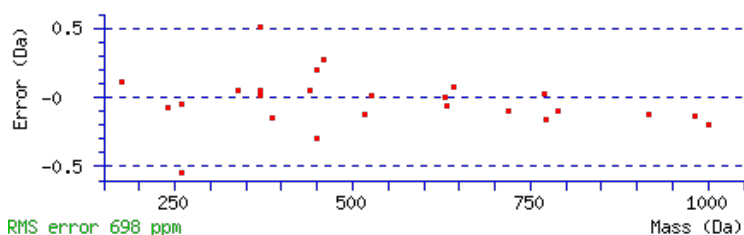

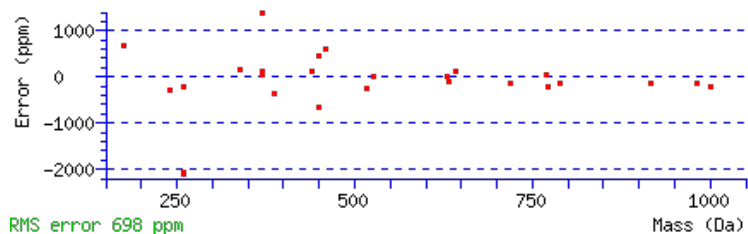

NCBI **BLAST** search of [EEQFNSTYR](#)  
 (Parameters: blastp, nr protein database, expect=20000, no filter, PAM30)

Other BLAST [web gateways](#)

**All matches to this query**

| Score | Mr(calc)  | Delta  | Sequence                   | Site Analysis        |
|-------|-----------|--------|----------------------------|----------------------|
| 45.2  | 1173.4938 | 0.0015 | <a href="#">EEQFNSTYR</a>  | Deamidated N5 99.71% |
| 19.9  | 1173.4938 | 0.0015 | <a href="#">EEQFNSTYR</a>  | Deamidated Q3 0.29%  |
| 10.9  | 1172.4945 | 1.0008 | <a href="#">QQQEPAQGQR</a> |                      |
| 10.9  | 1172.4945 | 1.0008 | <a href="#">QQQEPAQGQR</a> |                      |
| 6.5   | 1173.4938 | 0.0015 | <a href="#">WQDIQNDR</a>   |                      |
| 5.1   | 1173.4938 | 0.0015 | <a href="#">EEQYNSTER</a>  |                      |
| 4.0   | 1172.4945 | 1.0008 | <a href="#">QQPQQQR</a>    |                      |
| 3.2   | 1172.4945 | 1.0008 | <a href="#">QQQEPAQGQR</a> |                      |
| 2.8   | 1172.4954 | 0.9999 | <a href="#">MSGSTPEQMR</a> |                      |
| 2.1   | 1171.4928 | 2.0025 | <a href="#">QQQCPR</a>     |                      |

Mascot: <http://www.matrixscience.com/>

# MASCOT SCIENCE Mascot Search Results

## Peptide View

MS/MS Fragmentation of **GLTFQQNASSMCVDPDQTAIR**

Found in **P01871** in **con\_Xuniprot\_HUMAN3**, IGHM\_HUMAN Ig mu chain C region OS=Homo sapiens GN=IGHM PE=1 SV=3

Match to Query 15486: 2339.061968 from(1170.538260,2+) intensity(893289.5625) rtinseconds(1497) scans(3687) index(1992)

Title: 111019\_Est\_ISCardio\_NMI\_YP\_G\_4Spectrum3165\_scans\_\_3687

Data file C:\mascot\20140703\_Tmgf\_1D\CSV\_UseAnalysis\MasterCSV\All\_Glyco\mgf\ptm\UC18ERLIC\_PTM\_35D.mgf

Click mouse within plot area to zoom in by factor of two about that point

Or,  to  Da

Label all possible matches  Label matches used for scoring

Show Y-axis

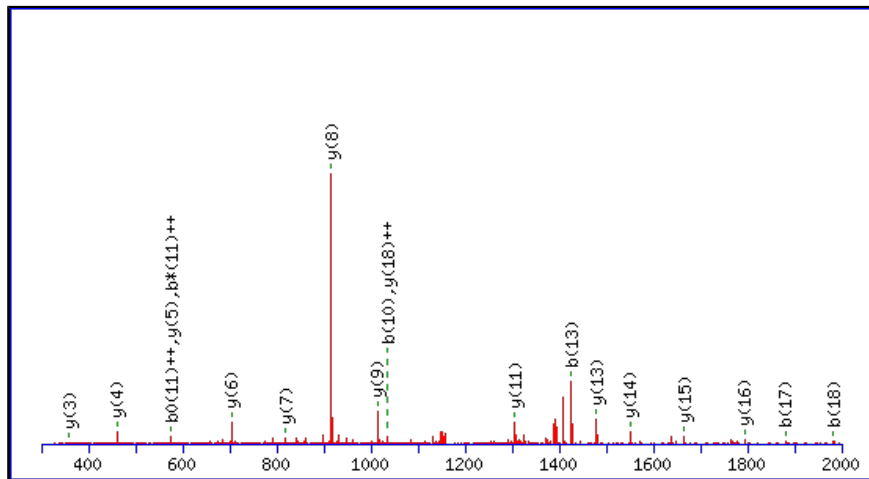

Monoisotopic mass of neutral peptide Mr(calc): 2339.0522

Fixed modifications: Carbamidomethyl (C) (apply to specified residues or termini only)

Variable modifications:

N7 : Deamidated (NQ)

Ions Score: 122 Expect: 9.4e-011

Matches : 19/222 fragment ions using 17 most intense peaks ([help](#))

| #  | b                | b <sup>++</sup> | b <sup>*</sup> | b <sup>*++</sup> | b <sup>0</sup> | b <sup>0++</sup> | Seq.     | y                | y <sup>++</sup>  | y <sup>*</sup> | y <sup>*++</sup> | y <sup>0</sup> | y <sup>0++</sup> | #         |
|----|------------------|-----------------|----------------|------------------|----------------|------------------|----------|------------------|------------------|----------------|------------------|----------------|------------------|-----------|
| 1  | 58.0287          | 29.5180         |                |                  |                |                  | <b>G</b> |                  |                  |                |                  |                |                  | <b>21</b> |
| 2  | 171.1128         | 86.0600         |                |                  |                |                  | <b>L</b> | 2283.0380        | 1142.0226        | 2266.0115      | 1133.5094        | 2265.0274      | 1133.0174        | <b>20</b> |
| 3  | 272.1605         | 136.5839        |                |                  | 254.1499       | 127.5786         | <b>T</b> | 2169.9539        | 1085.4806        | 2152.9274      | 1076.9673        | 2151.9434      | 1076.4753        | <b>19</b> |
| 4  | 419.2289         | 210.1181        |                |                  | 401.2183       | 201.1128         | <b>F</b> | 2068.9063        | <b>1034.9568</b> | 2051.8797      | 1026.4435        | 2050.8957      | 1025.9515        | <b>18</b> |
| 5  | 547.2875         | 274.1474        | 530.2609       | 265.6341         | 529.2769       | 265.1421         | <b>Q</b> | 1921.8379        | 961.4226         | 1904.8113      | 952.9093         | 1903.8273      | 952.4173         | <b>17</b> |
| 6  | 675.3461         | 338.1767        | 658.3195       | 329.6634         | 657.3355       | 329.1714         | <b>Q</b> | <b>1793.7793</b> | 897.3933         | 1776.7527      | 888.8800         | 1775.7687      | 888.3880         | <b>16</b> |
| 7  | 790.3730         | 395.6901        | 773.3464       | 387.1769         | 772.3624       | 386.6849         | <b>N</b> | <b>1665.7207</b> | 833.3640         | 1648.6941      | 824.8507         | 1647.7101      | 824.3587         | <b>15</b> |
| 8  | 861.4101         | 431.2087        | 844.3836       | 422.6954         | 843.3995       | 422.2034         | <b>A</b> | <b>1550.6938</b> | 775.8505         | 1533.6672      | 767.3372         | 1532.6832      | 766.8452         | <b>14</b> |
| 9  | 948.4421         | 474.7247        | 931.4156       | 466.2114         | 930.4316       | 465.7194         | <b>S</b> | <b>1479.6566</b> | 740.3320         | 1462.6301      | 731.8187         | 1461.6461      | 731.3267         | <b>13</b> |
| 10 | <b>1035.4742</b> | 518.2407        | 1018.4476      | 509.7274         | 1017.4636      | 509.2354         | <b>S</b> | 1392.6246        | 696.8159         | 1375.5981      | 688.3027         | 1374.6140      | 687.8107         | <b>12</b> |
| 11 | 1166.5147        | 583.7610        | 1149.4881      | <b>575.2477</b>  | 1148.5041      | <b>574.7557</b>  | <b>M</b> | <b>1305.5926</b> | 653.2999         | 1288.5660      | 644.7867         | 1287.5820      | 644.2946         | <b>11</b> |
| 12 | 1326.5453        | 663.7763        | 1309.5188      | 655.2630         | 1308.5347      | 654.7710         | <b>C</b> | 1174.5521        | 587.7797         | 1157.5256      | 579.2664         | 1156.5415      | 578.7744         | <b>10</b> |
| 13 | <b>1425.6137</b> | 713.3105        | 1408.5872      | 704.7972         | 1407.6031      | 704.3052         | <b>V</b> | <b>1014.5215</b> | 507.7644         | 997.4949       | 499.2511         | 996.5109       | 498.7591         | <b>9</b>  |
| 14 | 1522.6665        | 761.8369        | 1505.6399      | 753.3236         | 1504.6559      | 752.8316         | <b>P</b> | <b>915.4530</b>  | 458.2302         | 898.4265       | 449.7169         | 897.4425       | 449.2249         | <b>8</b>  |
| 15 | 1637.6934        | 819.3503        | 1620.6669      | 810.8371         | 1619.6829      | 810.3451         | <b>D</b> | <b>818.4003</b>  | 409.7038         | 801.3737       | 401.1905         | 800.3897       | 400.6985         | <b>7</b>  |
| 16 | 1765.7520        | 883.3796        | 1748.7255      | 874.8664         | 1747.7414      | 874.3744         | <b>Q</b> | <b>703.3733</b>  | 352.1903         | 686.3468       | 343.6770         | 685.3628       | 343.1850         | <b>6</b>  |
| 17 | <b>1880.7789</b> | 940.8931        | 1863.7524      | 932.3798         | 1862.7684      | 931.8878         | <b>D</b> | <b>575.3148</b>  | 288.1610         | 558.2882       | 279.6477         | 557.3042       | 279.1557         | <b>5</b>  |
| 18 | <b>1981.8266</b> | 991.4169        | 1964.8001      | 982.9037         | 1963.8161      | 982.4117         | <b>T</b> | <b>460.2878</b>  | 230.6475         | 443.2613       | 222.1343         | 442.2772       | 221.6423         | <b>4</b>  |
| 19 | 2052.8637        | 1026.9355       | 2035.8372      | 1018.4222        | 2034.8532      | 1017.9302        | <b>A</b> | <b>359.2401</b>  | 180.1237         | 342.2136       | 171.6104         |                |                  | <b>3</b>  |
| 20 | 2165.9478        | 1083.4775       | 2148.9213      | 1074.9643        | 2147.9372      | 1074.4723        | <b>I</b> | 288.2030         | 144.6051         | 271.1765       | 136.0919         |                |                  | <b>2</b>  |
| 21 |                  |                 |                |                  |                |                  | <b>R</b> | 175.1190         | 88.0631          | 158.0924       | 79.5498          |                |                  | <b>1</b>  |

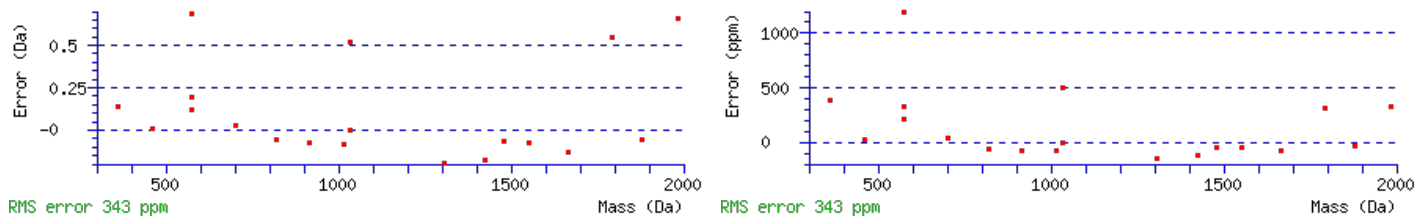

NCBI BLAST search of [GLTFQQNASSMCVDPQDTAIR](#)  
 (Parameters: blastp, nr protein database, expect=20000, no filter, PAM30)  
 Other BLAST [web gateways](#)

All matches to this query

| Score | Mr(calc)  | Delta   | Sequence                               | Site Analysis        |
|-------|-----------|---------|----------------------------------------|----------------------|
| 122.3 | 2339.0522 | 0.0098  | <a href="#">GLTFQQNASSMCVDPQDTAIR</a>  | Deamidated N7 98.90% |
| 102.7 | 2339.0522 | 0.0098  | <a href="#">GLTFQQNASSMCVDPQDTAIR</a>  | Deamidated Q6 1.08%  |
| 85.4  | 2339.0522 | 0.0098  | <a href="#">GLTFQQNASSMCVDPQDTAIR</a>  | Deamidated Q5 0.02%  |
| 64.8  | 2338.0682 | 0.9938  | <a href="#">GLTFQQNASSMCVDPQDTAIR</a>  |                      |
| 51.3  | 2339.0522 | 0.0098  | <a href="#">GLTFQQNASSMCVDPQDTAIR</a>  | Deamidated Q16 0.00% |
| 13.2  | 2338.0608 | 1.0012  | <a href="#">EQQCGSVNSYRVLDA GDPTSR</a> |                      |
| 5.7   | 2338.0576 | 1.0044  | <a href="#">TLFNLDEHQFDPDNLIMNF</a>    |                      |
| 5.4   | 2337.0648 | 1.9971  | <a href="#">LQQUESTLEFHGKTEDTPDK</a>   |                      |
| 1.2   | 2339.0627 | -0.0007 | <a href="#">ENLYGAHESNAEYLQMLINK</a>   |                      |
| 1.2   | 2339.0627 | -0.0007 | <a href="#">ENLYGAHESNAEYLQMLINK</a>   |                      |

Mascot: <http://www.matrixscience.com/>



# MASCOT SCIENCE Mascot Search Results

## Peptide View

MS/MS Fragmentation of **GLTFQQNASSMCVDPDQTAIR**

Found in **P01871** in **con\_Xuniprot\_HUMAN3**, IGHM\_HUMAN Ig mu chain C region OS=Homo sapiens GN=IGHM PE=1 SV=3

Match to Query 17835: 2355.054988 from(1178.534770,2+) intensity(104471.5625) rtinseconds(1103) scans(2613) index(5118)

Title: 111019\_Est\_ISCardio\_NMI\_YP\_G\_8Spectrum2266\_scans\_\_2613

Data file C:\mascot\20140703\_Tmgf\_1D\CSV\_UseAnalysis\MasterCSV\All\_Glyco\mgf\ptm\UC18ERLIC\_PTM\_35D.mgf

Click mouse within plot area to zoom in by factor of two about that point

Or,  to  Da

Label all possible matches  Label matches used for scoring

Show Y-axis

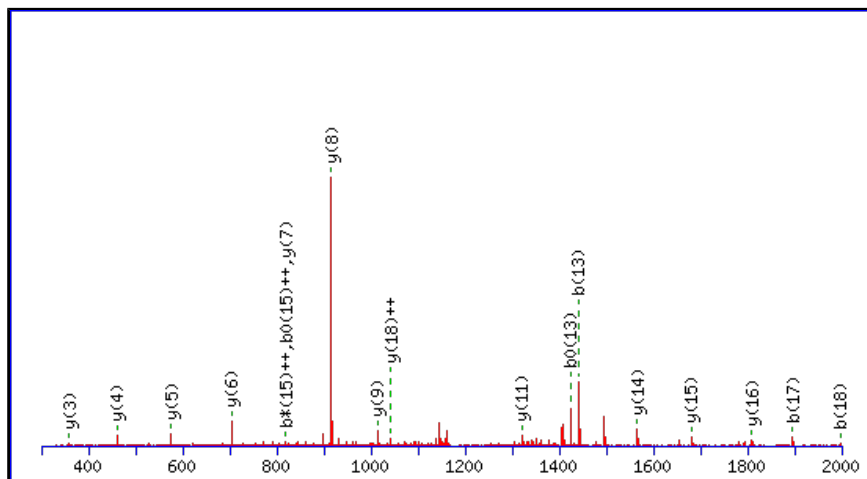

Monoisotopic mass of neutral peptide Mr(calc): 2355.0471

Fixed modifications: Carbamidomethyl (C) (apply to specified residues or termini only)

Variable modifications:

N7 : Deamidated (NQ)

M11 : Oxidation (M), with neutral losses 0.0000(shown in table), 63.9983

Ions Score: 103 Expect: 7e-009

Matches : 18/342 fragment ions using 17 most intense peaks ([help](#))

| #  | b         | b <sup>++</sup> | b <sup>*</sup> | b <sup>*++</sup> | b <sup>0</sup> | b <sup>0++</sup> | Seq. | y         | y <sup>++</sup> | y <sup>*</sup> | y <sup>*++</sup> | y <sup>0</sup> | y <sup>0++</sup> | #  |
|----|-----------|-----------------|----------------|------------------|----------------|------------------|------|-----------|-----------------|----------------|------------------|----------------|------------------|----|
| 1  | 58.0287   | 29.5180         |                |                  |                |                  | G    |           |                 |                |                  |                |                  | 21 |
| 2  | 171.1128  | 86.0600         |                |                  |                |                  | L    | 2299.0329 | 1150.0201       | 2282.0064      | 1141.5068        | 2281.0224      | 1141.0148        | 20 |
| 3  | 272.1605  | 136.5839        |                |                  | 254.1499       | 127.5786         | T    | 2185.9489 | 1093.4781       | 2168.9223      | 1084.9648        | 2167.9383      | 1084.4728        | 19 |
| 4  | 419.2289  | 210.1181        |                |                  | 401.2183       | 201.1128         | F    | 2084.9012 | 1042.9542       | 2067.8746      | 1034.4410        | 2066.8906      | 1033.9489        | 18 |
| 5  | 547.2875  | 274.1474        | 530.2609       | 265.6341         | 529.2769       | 265.1421         | Q    | 1937.8328 | 969.4200        | 1920.8062      | 960.9067         | 1919.8222      | 960.4147         | 17 |
| 6  | 675.3461  | 338.1767        | 658.3195       | 329.6634         | 657.3355       | 329.1714         | Q    | 1809.7742 | 905.3907        | 1792.7476      | 896.8775         | 1791.7636      | 896.3855         | 16 |
| 7  | 790.3730  | 395.6901        | 773.3464       | 387.1769         | 772.3624       | 386.6849         | N    | 1681.7156 | 841.3614        | 1664.6891      | 832.8482         | 1663.7050      | 832.3562         | 15 |
| 8  | 861.4101  | 431.2087        | 844.3836       | 422.6954         | 843.3995       | 422.2034         | A    | 1566.6887 | 783.8480        | 1549.6621      | 775.3347         | 1548.6781      | 774.8427         | 14 |
| 9  | 948.4421  | 474.7247        | 931.4156       | 466.2114         | 930.4316       | 465.7194         | S    | 1495.6516 | 748.3294        | 1478.6250      | 739.8161         | 1477.6410      | 739.3241         | 13 |
| 10 | 1035.4742 | 518.2407        | 1018.4476      | 509.7274         | 1017.4636      | 509.2354         | S    | 1408.6195 | 704.8134        | 1391.5930      | 696.3001         | 1390.6090      | 695.8081         | 12 |
| 11 | 1182.5096 | 591.7584        | 1165.4830      | 583.2451         | 1164.4990      | 582.7531         | M    | 1321.5875 | 661.2974        | 1304.5610      | 652.7841         | 1303.5769      | 652.2921         | 11 |
| 12 | 1342.5402 | 671.7737        | 1325.5137      | 663.2605         | 1324.5296      | 662.7685         | C    | 1174.5521 | 587.7797        | 1157.5256      | 579.2664         | 1156.5415      | 578.7744         | 10 |
| 13 | 1441.6086 | 721.3080        | 1424.5821      | 712.7947         | 1423.5981      | 712.3027         | V    | 1014.5215 | 507.7644        | 997.4949       | 499.2511         | 996.5109       | 498.7591         | 9  |
| 14 | 1538.6614 | 769.8343        | 1521.6348      | 761.3211         | 1520.6508      | 760.8291         | P    | 915.4530  | 458.2302        | 898.4265       | 449.7169         | 897.4425       | 449.2249         | 8  |
| 15 | 1653.6883 | 827.3478        | 1636.6618      | 818.8345         | 1635.6778      | 818.3425         | D    | 818.4003  | 409.7038        | 801.3737       | 401.1905         | 800.3897       | 400.6985         | 7  |
| 16 | 1781.7469 | 891.3771        | 1764.7204      | 882.8638         | 1763.7363      | 882.3718         | Q    | 703.3733  | 352.1903        | 686.3468       | 343.6770         | 685.3628       | 343.1850         | 6  |
| 17 | 1896.7739 | 948.8906        | 1879.7473      | 940.3773         | 1878.7633      | 939.8853         | D    | 575.3148  | 288.1610        | 558.2882       | 279.6477         | 557.3042       | 279.1557         | 5  |
| 18 | 1997.8215 | 999.4144        | 1980.7950      | 990.9011         | 1979.8110      | 990.4091         | T    | 460.2878  | 230.6475        | 443.2613       | 222.1343         | 442.2772       | 221.6423         | 4  |
| 19 | 2068.8587 | 1034.9330       | 2051.8321      | 1026.4197        | 2050.8481      | 1025.9277        | A    | 359.2401  | 180.1237        | 342.2136       | 171.6104         |                |                  | 3  |
| 20 | 2181.9427 | 1091.4750       | 2164.9162      | 1082.9617        | 2163.9321      | 1082.4697        | I    | 288.2030  | 144.6051        | 271.1765       | 136.0919         |                |                  | 2  |
| 21 |           |                 |                |                  |                |                  | R    | 175.1190  | 88.0631         | 158.0924       | 79.5498          |                |                  | 1  |

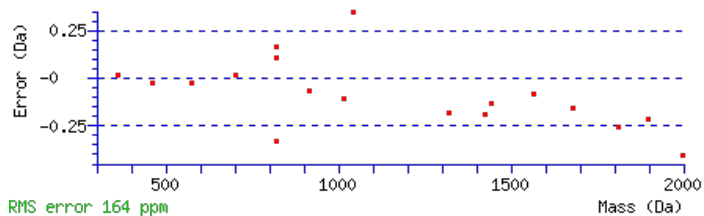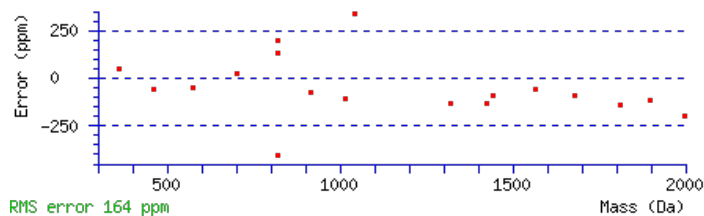

NCBI BLAST search of [GLTFQQNASSMCVPDQDTAIR](#)

(Parameters: blastp, nr protein database, expect=20000, no filter, PAM30)

Other BLAST [web gateways](#)

**All matches to this query**

| Score | Mr(calc)  | Delta   | Sequence                                | Site Analysis        |
|-------|-----------|---------|-----------------------------------------|----------------------|
| 102.8 | 2355.0471 | 0.0079  | <a href="#">GLTFQQNASSMCVPDQDTAIR</a>   | Deamidated N7 96.45% |
| 85.5  | 2355.0471 | 0.0079  | <a href="#">GLTFQQNASSMCVPDQDTAIR</a>   | Deamidated Q6 1.78%  |
| 85.5  | 2355.0471 | 0.0079  | <a href="#">GLTFQQNASSMCVPDQDTAIR</a>   | Deamidated Q5 1.78%  |
| 80.4  | 2354.0631 | 0.9919  | <a href="#">GLTFQQNASSMCVPDQDTAIR</a>   |                      |
| 52.3  | 2355.0471 | 0.0079  | <a href="#">GLTFQQNASSMCVPDQDTAIR</a>   | Deamidated Q16 0.00% |
| 7.4   | 2354.0572 | 0.9978  | <a href="#">YAWPCKLDYECPNFDQRR</a>      |                      |
| 7.2   | 2355.0509 | 0.0041  | <a href="#">ETKTFGGGGGGARSNLMNAAGNR</a> |                      |
| 4.3   | 2355.0583 | -0.0033 | <a href="#">MSSTNPCSPVSSGPTQYNLRR</a>   |                      |
| 4.1   | 2355.0509 | 0.0041  | <a href="#">ETKTFGGGGGGARSNLMNAAGNR</a> |                      |
| 3.7   | 2355.0509 | 0.0041  | <a href="#">ETKTFGGGGGGARSNLMNAAGNR</a> |                      |

Mascot: <http://www.matrixscience.com/>

# MATRIX SCIENCE Mascot Search Results

## Peptide View

MS/MS Fragmentation of **VDHRGLTFQQNASSMCVPDQDTAIR**

Found in **P01871** in **con\_Xuniprot\_HUMAN3**, IGHM\_HUMAN Ig mu chain C region OS=Homo sapiens GN=IGHM PE=1 SV=3

Match to Query 25752: 2846.320632 from(949.780820,3+) intensity(64393.9727) rtinseconds(1214) scans(2898) index(1952)

Title: 111019\_Est\_ISCardio\_NMI\_YP\_G\_4Spectrum2469\_scans\_\_2898

Data file C:\mascot\20140703\_Tmgf\_1D\CSV\_UseAnalysis\MasterCSV\All\_Glyco\mgf\ptm\UC18ERLIC\_PTM\_35D.mgf

Click mouse within plot area to zoom in by factor of two about that point

Or, to Da

Label all possible matches Label matches used for scoring

Show Y-axis

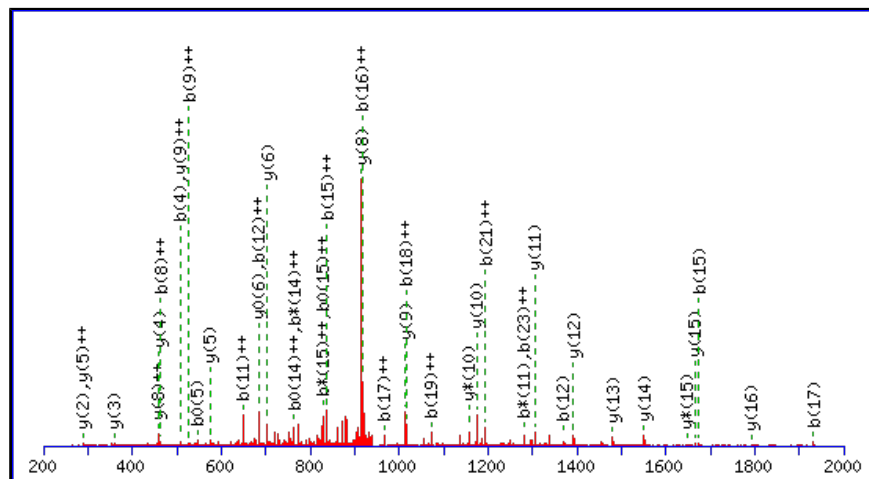

Monoisotopic mass of neutral peptide Mr(calc): 2846.3076

Fixed modifications: Carbamidomethyl (C) (apply to specified residues or termini only)

Variable modifications:

N11 : Deamidated (NQ)

Ions Score: 96 Expect: 5.3e-008

Matches : 41/274 fragment ions using 51 most intense peaks ([help](#))

| #  | b                | b <sup>++</sup>  | b <sup>*</sup>   | b <sup>*++</sup> | b <sup>0</sup>  | b <sup>0++</sup> | Seq. | y                | y <sup>++</sup> | y <sup>*</sup>   | y <sup>*++</sup> | y <sup>0</sup>  | y <sup>0++</sup> | #  |
|----|------------------|------------------|------------------|------------------|-----------------|------------------|------|------------------|-----------------|------------------|------------------|-----------------|------------------|----|
| 1  | 100.0757         | 50.5415          |                  |                  |                 |                  | V    |                  |                 |                  |                  |                 |                  | 25 |
| 2  | 215.1026         | 108.0550         |                  |                  | 197.0921        | 99.0497          | D    | 2748.2464        | 1374.6269       | 2731.2199        | 1366.1136        | 2730.2359       | 1365.6216        | 24 |
| 3  | 352.1615         | 176.5844         |                  |                  | 334.1510        | 167.5791         | H    | 2633.2195        | 1317.1134       | 2616.1929        | 1308.6001        | 2615.2089       | 1308.1081        | 23 |
| 4  | <b>508.2627</b>  | 254.6350         | 491.2361         | 246.1217         | 490.2521        | 245.6297         | R    | 2496.1606        | 1248.5839       | 2479.1340        | 1240.0707        | 2478.1500       | 1239.5786        | 22 |
| 5  | 565.2841         | 283.1457         | 548.2576         | 274.6324         | <b>547.2736</b> | 274.1404         | G    | 2340.0595        | 1170.5334       | 2323.0329        | 1162.0201        | 2322.0489       | 1161.5281        | 21 |
| 6  | 678.3682         | 339.6877         | 661.3416         | 331.1745         | 660.3576        | 330.6824         | L    | 2283.0380        | 1142.0226       | 2266.0115        | 1133.5094        | 2265.0274       | 1133.0174        | 20 |
| 7  | 779.4159         | 390.2116         | 762.3893         | 381.6983         | 761.4053        | 381.2063         | T    | 2169.9539        | 1085.4806       | 2152.9274        | 1076.9673        | 2151.9434       | 1076.4753        | 19 |
| 8  | 926.4843         | <b>463.7458</b>  | 909.4577         | 455.2325         | 908.4737        | 454.7405         | F    | 2068.9063        | 1034.9568       | 2051.8797        | 1026.4435        | 2050.8957       | 1025.9515        | 18 |
| 9  | 1054.5429        | <b>527.7751</b>  | 1037.5163        | 519.2618         | 1036.5323       | 518.7698         | Q    | 1921.8379        | 961.4226        | 1904.8113        | 952.9093         | 1903.8273       | 952.4173         | 17 |
| 10 | 1182.6014        | 591.8044         | 1165.5749        | 583.2911         | 1164.5909       | 582.7991         | Q    | <b>1793.7793</b> | 897.3933        | 1776.7527        | 888.8800         | 1775.7687       | 888.3880         | 16 |
| 11 | 1297.6284        | <b>649.3178</b>  | <b>1280.6018</b> | 640.8046         | 1279.6178       | 640.3125         | N    | <b>1665.7207</b> | 833.3640        | <b>1648.6941</b> | 824.8507         | 1647.7101       | 824.3587         | 15 |
| 12 | <b>1368.6655</b> | <b>684.8364</b>  | 1351.6389        | 676.3231         | 1350.6549       | 675.8311         | A    | <b>1550.6938</b> | 775.8505        | 1533.6672        | 767.3372         | 1532.6832       | 766.8452         | 14 |
| 13 | 1455.6975        | 728.3524         | 1438.6710        | 719.8391         | 1437.6870       | 719.3471         | S    | <b>1479.6566</b> | 740.3320        | 1462.6301        | 731.8187         | 1461.6461       | 731.3267         | 13 |
| 14 | 1542.7295        | 771.8684         | 1525.7030        | <b>763.3551</b>  | 1524.7190       | <b>762.8631</b>  | S    | <b>1392.6246</b> | 696.8159        | 1375.5981        | 688.3027         | 1374.6140       | 687.8107         | 12 |
| 15 | <b>1673.7700</b> | <b>837.3887</b>  | 1656.7435        | <b>828.8754</b>  | 1655.7595       | <b>828.3834</b>  | M    | <b>1305.5926</b> | 653.2999        | 1288.5660        | 644.7867         | 1287.5820       | 644.2946         | 11 |
| 16 | 1833.8007        | <b>917.4040</b>  | 1816.7741        | 908.8907         | 1815.7901       | 908.3987         | C    | <b>1174.5521</b> | 587.7797        | <b>1157.5256</b> | 579.2664         | 1156.5415       | 578.7744         | 10 |
| 17 | <b>1932.8691</b> | <b>966.9382</b>  | 1915.8425        | 958.4249         | 1914.8585       | 957.9329         | V    | <b>1014.5215</b> | <b>507.7644</b> | 997.4949         | 499.2511         | 996.5109        | 498.7591         | 9  |
| 18 | 2029.9219        | <b>1015.4646</b> | 2012.8953        | 1006.9513        | 2011.9113       | 1006.4593        | P    | <b>915.4530</b>  | <b>458.2302</b> | 898.4265         | 449.7169         | 897.4425        | 449.2249         | 8  |
| 19 | 2144.9488        | <b>1072.9780</b> | 2127.9223        | 1064.4648        | 2126.9382       | 1063.9728        | D    | 818.4003         | 409.7038        | 801.3737         | 401.1905         | 800.3897        | 400.6985         | 7  |
| 20 | 2273.0074        | 1137.0073        | 2255.9808        | 1128.4941        | 2254.9968       | 1128.0020        | Q    | <b>703.3733</b>  | 352.1903        | 686.3468         | 343.6770         | <b>685.3628</b> | 343.1850         | 6  |
| 21 | 2388.0343        | <b>1194.5208</b> | 2371.0078        | 1186.0075        | 2370.0238       | 1185.5155        | D    | <b>575.3148</b>  | <b>288.1610</b> | 558.2882         | 279.6477         | 557.3042        | 279.1557         | 5  |
| 22 | 2489.0820        | 1245.0446        | 2472.0555        | 1236.5314        | 2471.0714       | 1236.0394        | T    | <b>460.2878</b>  | 230.6475        | 443.2613         | 222.1343         | 442.2772        | 221.6423         | 4  |
| 23 | 2560.1191        | <b>1280.5632</b> | 2543.0926        | 1272.0499        | 2542.1085       | 1271.5579        | A    | <b>359.2401</b>  | 180.1237        | 342.2136         | 171.6104         |                 |                  | 3  |

|    |           |           |           |           |           |           |   |          |          |          |          |  |  |   |
|----|-----------|-----------|-----------|-----------|-----------|-----------|---|----------|----------|----------|----------|--|--|---|
| 24 | 2673.2032 | 1337.1052 | 2656.1766 | 1328.5920 | 2655.1926 | 1328.0999 | I | 288.2030 | 144.6051 | 271.1765 | 136.0919 |  |  | 2 |
| 25 |           |           |           |           |           |           | R | 175.1190 | 88.0631  | 158.0924 | 79.5498  |  |  | 1 |

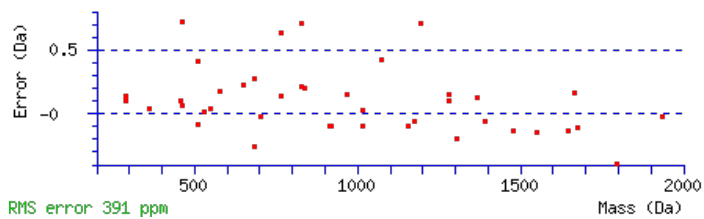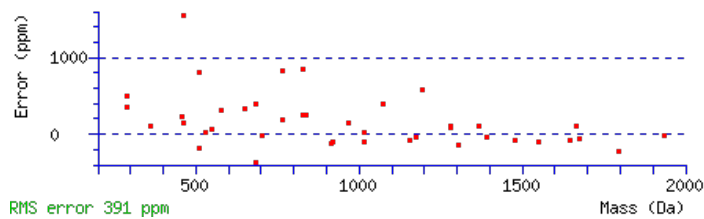

NCBI BLAST search of [VDHRGLTFQQNASSMCVPDQDTAIR](#)  
 (Parameters: blastp, nr protein database, expect=20000, no filter, PAM30)  
 Other BLAST [web gateways](#)

All matches to this query

| Score | Mr(calc)  | Delta  | Sequence                                  | Site Analysis         |
|-------|-----------|--------|-------------------------------------------|-----------------------|
| 96.0  | 2846.3076 | 0.0130 | <a href="#">VDHRGLTFQQNASSMCVPDQDTAIR</a> | Deamidated N11 87.46% |
| 84.5  | 2846.3076 | 0.0130 | <a href="#">VDHRGLTFQQNASSMCVPDQDTAIR</a> | Deamidated Q10 6.25%  |
| 84.5  | 2846.3076 | 0.0130 | <a href="#">VDHRGLTFQQNASSMCVPDQDTAIR</a> | Deamidated Q9 6.25%   |
| 67.2  | 2845.3236 | 0.9971 | <a href="#">VDHRGLTFQQNASSMCVPDQDTAIR</a> |                       |
| 63.1  | 2846.3076 | 0.0130 | <a href="#">VDHRGLTFQQNASSMCVPDQDTAIR</a> | Deamidated Q20 0.05%  |
| 7.0   | 2846.3109 | 0.0097 | <a href="#">NQGFESLSVRTQGISMTCMEGRSLR</a> |                       |
| 7.0   | 2846.3109 | 0.0097 | <a href="#">NQGFESLSVRTQGISMTCMEGRSLR</a> |                       |
| 5.2   | 2845.3237 | 0.9969 | <a href="#">TMILNFCSYMQWVPGSDVLVAQNR</a>  |                       |
| 4.1   | 2846.3078 | 0.0129 | <a href="#">TMILNFCSYMQWVPGSDVLVAQNR</a>  |                       |
| 4.0   | 2846.3189 | 0.0017 | <a href="#">SQREMEEKYIVSAWYNMGMTLHK</a>   |                       |

Mascot: <http://www.matrixscience.com/>

# MASCOT SCIENCE Mascot Search Results

## Peptide View

MS/MS Fragmentation of **TVDKSTGKPTLYNVLVMSDTAGTCY**

Found in **P01871** in **con\_Xuniprot\_HUMAN3**, IGHM\_HUMAN Ig mu chain C region OS=Homo sapiens GN=IGHM PE=1 SV=3

Match to Query 25609: 2808.333102 from(937.118310,3+) intensity(39596.9766) rtinseconds(1923) scans(4730) index(859)

Title: 111019\_Est\_ISCardio\_NMI\_YP\_G\_2Spectrum4108\_scans\_\_4730

Data file C:\mascot\20140703\_Tmgf\_1D\CSV\_UseAnalysis\MasterCSV\All\_Glyco\mgf\ptm\UC18ERLIC\_PTM\_35D.mgf

Click mouse within plot area to zoom in by factor of two about that point

Or, to Da

Label all possible matches Label matches used for scoring

Show Y-axis

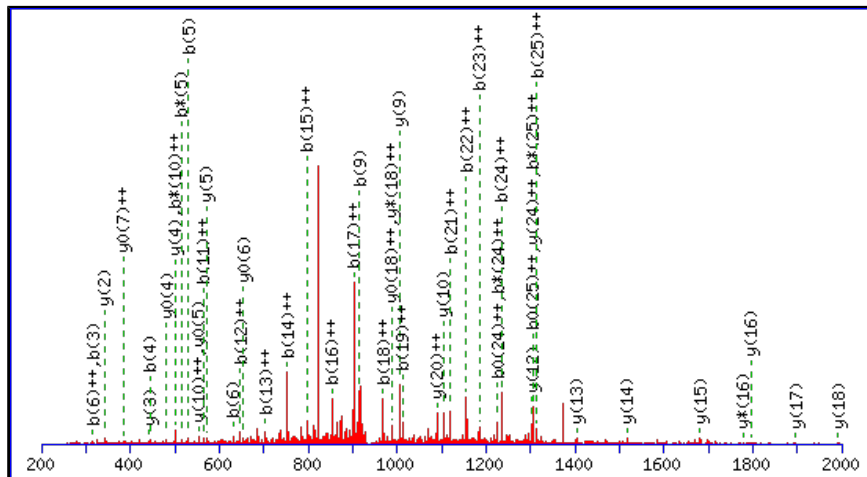

Monoisotopic mass of neutral peptide Mr(calc): 2808.3198

Fixed modifications: Carbamidomethyl (C) (apply to specified residues or termini only)

Variable modifications:

N13 : Deamidated (NQ)

Ions Score: 81 Expect: 1.8e-006

Matches : 49/264 fragment ions using 87 most intense peaks ([help](#))

| #  | b               | b <sup>++</sup>  | b <sup>*</sup>  | b <sup>*++</sup> | b <sup>0</sup> | b <sup>0++</sup> | Seq. | y                | y <sup>++</sup>  | y <sup>*</sup>   | y <sup>*++</sup> | y <sup>0</sup>  | y <sup>0++</sup> | #  |
|----|-----------------|------------------|-----------------|------------------|----------------|------------------|------|------------------|------------------|------------------|------------------|-----------------|------------------|----|
| 1  | 102.0550        | 51.5311          |                 |                  | 84.0444        | 42.5258          | T    |                  |                  |                  |                  |                 |                  | 26 |
| 2  | 201.1234        | 101.0653         |                 |                  | 183.1128       | 92.0600          | V    | 2708.2794        | 1354.6433        | 2691.2528        | 1346.1300        | 2690.2688       | 1345.6380        | 25 |
| 3  | <b>316.1503</b> | 158.5788         |                 |                  | 298.1397       | 149.5735         | D    | 2609.2109        | <b>1305.1091</b> | 2592.1844        | 1296.5958        | 2591.2004       | 1296.1038        | 24 |
| 4  | <b>444.2453</b> | 222.6263         | 427.2187        | 214.1130         | 426.2347       | 213.6210         | K    | 2494.1840        | 1247.5956        | 2477.1575        | 1239.0824        | 2476.1734       | 1238.5904        | 23 |
| 5  | <b>531.2773</b> | 266.1423         | <b>514.2508</b> | 257.6290         | 513.2667       | 257.1370         | S    | 2366.0890        | 1183.5482        | 2349.0625        | 1175.0349        | 2348.0785       | 1174.5429        | 22 |
| 6  | <b>632.3250</b> | <b>316.6661</b>  | 615.2984        | 308.1529         | 614.3144       | 307.6608         | T    | 2279.0570        | 1140.0321        | 2262.0305        | 1131.5189        | 2261.0465       | 1131.0269        | 21 |
| 7  | 689.3464        | 345.1769         | 672.3199        | 336.6636         | 671.3359       | 336.1716         | G    | 2178.0093        | <b>1089.5083</b> | 2160.9828        | 1080.9950        | 2159.9988       | 1080.5030        | 20 |
| 8  | 817.4414        | 409.2243         | 800.4149        | 400.7111         | 799.4308       | 400.2191         | K    | 2120.9879        | 1060.9976        | 2103.9613        | 1052.4843        | 2102.9773       | 1051.9923        | 19 |
| 9  | <b>914.4942</b> | 457.7507         | 897.4676        | 449.2375         | 896.4836       | 448.7454         | P    | <b>1992.8929</b> | 996.9501         | 1975.8664        | <b>988.4368</b>  | 1974.8823       | <b>987.9448</b>  | 18 |
| 10 | 1015.5419       | 508.2746         | 998.5153        | <b>499.7613</b>  | 997.5313       | 499.2693         | T    | <b>1895.8401</b> | 948.4237         | 1878.8136        | 939.9104         | 1877.8296       | 939.4184         | 17 |
| 11 | 1128.6259       | <b>564.8166</b>  | 1111.5994       | 556.3033         | 1110.6154      | 555.8113         | L    | <b>1794.7925</b> | 897.8999         | <b>1777.7659</b> | 889.3866         | 1776.7819       | 888.8946         | 16 |
| 12 | 1291.6892       | <b>646.3483</b>  | 1274.6627       | 637.8350         | 1273.6787      | 637.3430         | Y    | <b>1681.7084</b> | 841.3578         | 1664.6819        | 832.8446         | 1663.6978       | 832.3526         | 15 |
| 13 | 1406.7162       | <b>703.8617</b>  | 1389.6896       | 695.3485         | 1388.7056      | 694.8564         | N    | <b>1518.6451</b> | 759.8262         | 1501.6185        | 751.3129         | 1500.6345       | 750.8209         | 14 |
| 14 | 1505.7846       | <b>753.3959</b>  | 1488.7581       | 744.8827         | 1487.7740      | 744.3907         | V    | <b>1403.6181</b> | 702.3127         |                  |                  | 1385.6076       | 693.3074         | 13 |
| 15 | 1592.8166       | <b>796.9120</b>  | 1575.7901       | 788.3987         | 1574.8061      | 787.9067         | S    | <b>1304.5497</b> | 652.7785         |                  |                  | 1286.5392       | 643.7732         | 12 |
| 16 | 1705.9007       | <b>853.4540</b>  | 1688.8741       | 844.9407         | 1687.8901      | 844.4487         | L    | 1217.5177        | 609.2625         |                  |                  | 1199.5071       | 600.2572         | 11 |
| 17 | 1804.9691       | <b>902.9882</b>  | 1787.9426       | 894.4749         | 1786.9585      | 893.9829         | V    | <b>1104.4336</b> | <b>552.7205</b>  |                  |                  | 1086.4231       | 543.7152         | 10 |
| 18 | 1936.0096       | <b>968.5084</b>  | 1918.9830       | 959.9952         | 1917.9990      | 959.5032         | M    | <b>1005.3652</b> | 503.1862         |                  |                  | 987.3546        | 494.1810         | 9  |
| 19 | 2023.0416       | <b>1012.0244</b> | 2006.0151       | 1003.5112        | 2005.0311      | 1003.0192        | S    | 874.3247         | 437.6660         |                  |                  | 856.3142        | 428.6607         | 8  |
| 20 | 2138.0686       | 1069.5379        | 2121.0420       | 1061.0246        | 2120.0580      | 1060.5326        | D    | 787.2927         | 394.1500         |                  |                  | 769.2821        | <b>385.1447</b>  | 7  |
| 21 | 2239.1162       | <b>1120.0618</b> | 2222.0897       | 1111.5485        | 2221.1057      | 1111.0565        | T    | 672.2658         | 336.6365         |                  |                  | <b>654.2552</b> | 327.6312         | 6  |
| 22 | 2310.1534       | <b>1155.5803</b> | 2293.1268       | 1147.0670        | 2292.1428      | 1146.5750        | A    | <b>571.2181</b>  | 286.1127         |                  |                  | <b>553.2075</b> | 277.1074         | 5  |
| 23 | 2367.1748       | <b>1184.0910</b> | 2350.1483       | 1175.5778        | 2349.1643      | 1175.0858        | G    | <b>500.1810</b>  | 250.5941         |                  |                  | <b>482.1704</b> | 241.5888         | 4  |

|    |           |                  |           |                  |           |                  |   |                 |          |  |  |          |          |   |
|----|-----------|------------------|-----------|------------------|-----------|------------------|---|-----------------|----------|--|--|----------|----------|---|
| 24 | 2468.2225 | <b>1234.6149</b> | 2451.1960 | <b>1226.1016</b> | 2450.2119 | <b>1225.6096</b> | T | <b>443.1595</b> | 222.0834 |  |  | 425.1489 | 213.0781 | 3 |
| 25 | 2628.2531 | <b>1314.6302</b> | 2611.2266 | <b>1306.1169</b> | 2610.2426 | <b>1305.6249</b> | C | <b>342.1118</b> | 171.5595 |  |  |          |          | 2 |
| 26 |           |                  |           |                  |           |                  | Y | 182.0812        | 91.5442  |  |  |          |          | 1 |

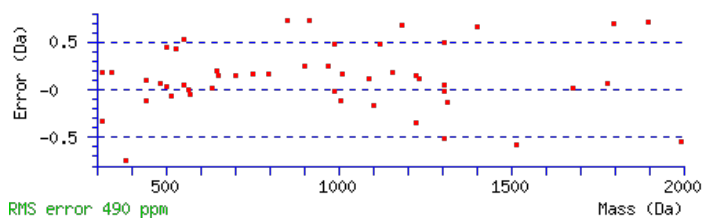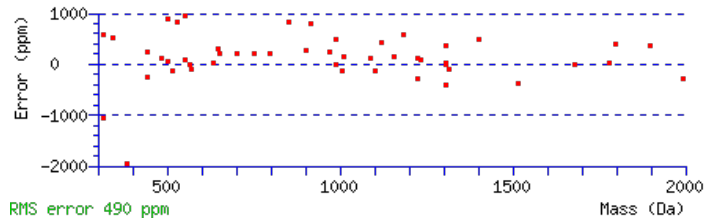

NCBI BLAST search of [TVDKSTGKPTLYNVSLVMSDTAGTCY](#)  
 (Parameters: blastp, nr protein database, expect=20000, no filter, PAM30)  
 Other BLAST [web gateways](#)

All matches to this query

| Score | Mr(calc)  | Delta  | Sequence                                   |
|-------|-----------|--------|--------------------------------------------|
| 81.4  | 2808.3198 | 0.0133 | <a href="#">TVDKSTGKPTLYNVSLVMSDTAGTCY</a> |
| 55.7  | 2807.3358 | 0.9973 | <a href="#">TVDKSTGKPTLYNVSLVMSDTAGTCY</a> |
| 6.2   | 2808.3270 | 0.0062 | <a href="#">NLESARVSMVGQVKQCEGITSPEGSK</a> |
| 4.0   | 2806.3177 | 2.0154 | <a href="#">NSTLLVNLAELNNGNDMLAQRSAEK</a>  |
| 4.0   | 2806.3177 | 2.0154 | <a href="#">NSTLLVNLAELNNGNDMLAQRSAEK</a>  |
| 4.0   | 2806.3177 | 2.0154 | <a href="#">NSTLLVNLAELNNGNDMLAQRSAEK</a>  |
| 4.0   | 2806.3177 | 2.0154 | <a href="#">NSTLLVNLAELNNGNDMLAQRSAEK</a>  |
| 4.0   | 2806.3177 | 2.0154 | <a href="#">NSTLLVNLAELNNGNDMLAQRSAEK</a>  |
| 4.0   | 2806.3177 | 2.0154 | <a href="#">NSTLLVNLAELNNGNDMLAQRSAEK</a>  |
| 2.4   | 2807.3429 | 0.9902 | <a href="#">NLESARVSMVGQVKQCEGITSPEGSK</a> |

Mascot: <http://www.matrixscience.com/>

# MATRIX SCIENCE Mascot Search Results

## Peptide View

MS/MS Fragmentation of **GLTFQQNASSMCVDPDQTAIR**

Found in **P01871** in **con\_Xuniprot\_HUMAN3**, IGHM\_HUMAN Ig mu chain C region OS=Homo sapiens GN=IGHM PE=1 SV=3

Match to Query 17869: 2356.038748 from(1179.026650,2+) intensity(33681.4531) rtinseconds(1112) scans(2775) index(6293)

Title: 111019\_Est\_ISCardio\_NMI\_YP\_G\_9Spectrum2439\_scans\_\_2775

Data file C:\mascot\20140703\_Tmgf\_1D\CSV\_UseAnalysis\MasterCSV\All\_Glyco\mgf\ptm\UC18ERLIC\_PTM\_35D.mgf

Click mouse within plot area to zoom in by factor of two about that point

Or,  to  Da

Label all possible matches  Label matches used for scoring

Show Y-axis

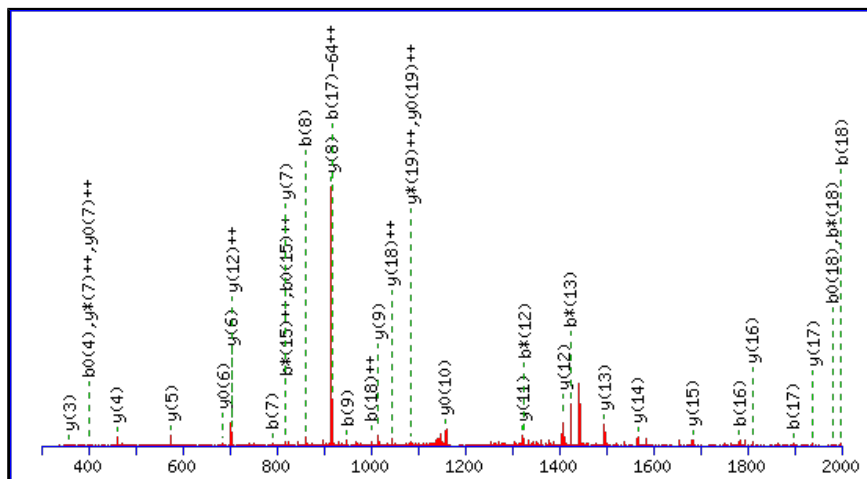

Monoisotopic mass of neutral peptide Mr(calc): 2356.0311

Fixed modifications: Carbamidomethyl (C) (apply to specified residues or termini only)

Variable modifications:

N7 : Deamidated (NQ)

M11 : Oxidation (M), with neutral losses 0.0000(shown in table), 63.9983

Q16 : Deamidated (NQ)

Ions Score: 77 Expect: 2.1e-006

Matches : 37/342 fragment ions using 68 most intense peaks ([help](#))

| #  | b                | b <sup>++</sup> | b <sup>*</sup>   | b <sup>*++</sup> | b <sup>0</sup>   | b <sup>0++</sup> | Seq.     | y                | y <sup>++</sup>  | y <sup>*</sup> | y <sup>*++</sup> | y <sup>0</sup>   | y <sup>0++</sup> | #         |
|----|------------------|-----------------|------------------|------------------|------------------|------------------|----------|------------------|------------------|----------------|------------------|------------------|------------------|-----------|
| 1  | 58.0287          | 29.5180         |                  |                  |                  |                  | <b>G</b> |                  |                  |                |                  |                  |                  | <b>21</b> |
| 2  | 171.1128         | 86.0600         |                  |                  |                  |                  | <b>L</b> | 2300.0169        | 1150.5121        | 2282.9904      | 1141.9988        | 2282.0064        | 1141.5068        | <b>20</b> |
| 3  | 272.1605         | 136.5839        |                  |                  | 254.1499         | 127.5786         | <b>T</b> | 2186.9329        | 1093.9701        | 2169.9063      | <b>1085.4568</b> | 2168.9223        | <b>1084.9648</b> | <b>19</b> |
| 4  | 419.2289         | 210.1181        |                  |                  | <b>401.2183</b>  | 201.1128         | <b>F</b> | 2085.8852        | <b>1043.4462</b> | 2068.8586      | 1034.9330        | 2067.8746        | 1034.4410        | <b>18</b> |
| 5  | 547.2875         | 274.1474        | 530.2609         | 265.6341         | 529.2769         | 265.1421         | <b>Q</b> | <b>1938.8168</b> | 969.9120         | 1921.7902      | 961.3988         | 1920.8062        | 960.9067         | <b>17</b> |
| 6  | 675.3461         | 338.1767        | 658.3195         | 329.6634         | 657.3355         | 329.1714         | <b>Q</b> | <b>1810.7582</b> | 905.8827         | 1793.7317      | 897.3695         | 1792.7476        | 896.8775         | <b>16</b> |
| 7  | <b>790.3730</b>  | 395.6901        | 773.3464         | 387.1769         | 772.3624         | 386.6849         | <b>N</b> | <b>1682.6996</b> | 841.8535         | 1665.6731      | 833.3402         | 1664.6891        | 832.8482         | <b>15</b> |
| 8  | <b>861.4101</b>  | 431.2087        | 844.3836         | 422.6954         | 843.3995         | 422.2034         | <b>A</b> | <b>1567.6727</b> | 784.3400         | 1550.6461      | 775.8267         | 1549.6621        | 775.3347         | <b>14</b> |
| 9  | <b>948.4421</b>  | 474.7247        | 931.4156         | 466.2114         | 930.4316         | 465.7194         | <b>S</b> | <b>1496.6356</b> | 748.8214         | 1479.6090      | 740.3081         | 1478.6250        | 739.8161         | <b>13</b> |
| 10 | 1035.4742        | 518.2407        | 1018.4476        | 509.7274         | 1017.4636        | 509.2354         | <b>S</b> | <b>1409.6035</b> | <b>705.3054</b>  | 1392.5770      | 696.7921         | 1391.5930        | 696.3001         | <b>12</b> |
| 11 | 1182.5096        | 591.7584        | 1165.4830        | 583.2451         | 1164.4990        | 582.7531         | <b>M</b> | <b>1322.5715</b> | 661.7894         | 1305.5450      | 653.2761         | 1304.5610        | 652.7841         | <b>11</b> |
| 12 | 1342.5402        | 671.7737        | <b>1325.5137</b> | 663.2605         | 1324.5296        | 662.7685         | <b>C</b> | 1175.5361        | 588.2717         | 1158.5096      | 579.7584         | <b>1157.5256</b> | 579.2664         | <b>10</b> |
| 13 | 1441.6086        | 721.3080        | <b>1424.5821</b> | 712.7947         | 1423.5981        | 712.3027         | <b>V</b> | <b>1015.5055</b> | 508.2564         | 998.4789       | 499.7431         | 997.4949         | 499.2511         | <b>9</b>  |
| 14 | 1538.6614        | 769.8343        | 1521.6348        | 761.3211         | 1520.6508        | 760.8291         | <b>P</b> | <b>916.4371</b>  | 458.7222         | 899.4105       | 450.2089         | 898.4265         | 449.7169         | <b>8</b>  |
| 15 | 1653.6883        | 827.3478        | 1636.6618        | <b>818.8345</b>  | 1635.6778        | <b>818.3425</b>  | <b>D</b> | <b>819.3843</b>  | 410.1958         | 802.3577       | <b>401.6825</b>  | 801.3737         | <b>401.1905</b>  | <b>7</b>  |
| 16 | <b>1782.7309</b> | 891.8691        | 1765.7044        | 883.3558         | 1764.7204        | 882.8638         | <b>Q</b> | <b>704.3573</b>  | 352.6823         | 687.3308       | 344.1690         | <b>686.3468</b>  | 343.6770         | <b>6</b>  |
| 17 | <b>1897.7579</b> | 949.3826        | 1880.7313        | 940.8693         | 1879.7473        | 940.3773         | <b>D</b> | <b>575.3148</b>  | 288.1610         | 558.2882       | 279.6477         | 557.3042         | 279.1557         | <b>5</b>  |
| 18 | <b>1998.8056</b> | <b>999.9064</b> | <b>1981.7790</b> | 991.3931         | <b>1980.7950</b> | 990.9011         | <b>T</b> | <b>460.2878</b>  | 230.6475         | 443.2613       | 222.1343         | 442.2772         | 221.6423         | <b>4</b>  |
| 19 | 2069.8427        | 1035.4250       | 2052.8161        | 1026.9117        | 2051.8321        | 1026.4197        | <b>A</b> | <b>359.2401</b>  | 180.1237         | 342.2136       | 171.6104         |                  |                  | <b>3</b>  |
| 20 | 2182.9267        | 1091.9670       | 2165.9002        | 1083.4537        | 2164.9162        | 1082.9617        | <b>I</b> | 288.2030         | 144.6051         | 271.1765       | 136.0919         |                  |                  | <b>2</b>  |
| 21 |                  |                 |                  |                  |                  |                  | <b>R</b> | 175.1190         | 88.0631          | 158.0924       | 79.5498          |                  |                  | <b>1</b>  |



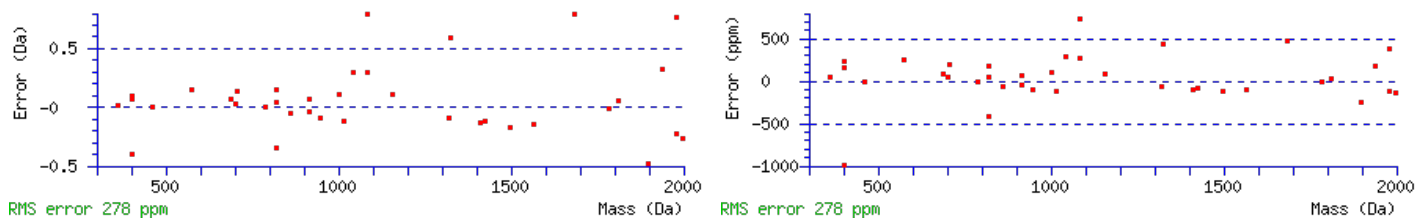

NCBI BLAST search of [GLTFQQNASSMCVPDQDTAIR](#)  
 (Parameters: blastp, nr protein database, expect=20000, no filter, PAM30)  
 Other BLAST [web gateways](#)

**All matches to this query**

| Score | Mr(calc)  | Delta  | Sequence                              | Site Analysis             |
|-------|-----------|--------|---------------------------------------|---------------------------|
| 77.1  | 2356.0311 | 0.0076 | <a href="#">GLTFQQNASSMCVPDQDTAIR</a> | Deamidated N7, Q16 53.97% |
| 75.6  | 2356.0311 | 0.0076 | <a href="#">GLTFQQNASSMCVPDQDTAIR</a> | Deamidated Q6, Q16 38.12% |
| 66.1  | 2356.0311 | 0.0076 | <a href="#">GLTFQQNASSMCVPDQDTAIR</a> | Deamidated Q6, N7 4.33%   |
| 64.7  | 2356.0311 | 0.0076 | <a href="#">GLTFQQNASSMCVPDQDTAIR</a> | Deamidated Q5, Q16 3.12%  |
| 56.0  | 2356.0311 | 0.0076 | <a href="#">GLTFQQNASSMCVPDQDTAIR</a> | Deamidated Q5, N7 0.42%   |
| 46.6  | 2356.0311 | 0.0076 | <a href="#">GLTFQQNASSMCVPDQDTAIR</a> | Deamidated Q5, Q6 0.05%   |
| 44.8  | 2355.0471 | 0.9916 | <a href="#">GLTFQQNASSMCVPDQDTAIR</a> |                           |
| 36.4  | 2355.0471 | 0.9916 | <a href="#">GLTFQQNASSMCVPDQDTAIR</a> |                           |
| 36.4  | 2355.0471 | 0.9916 | <a href="#">GLTFQQNASSMCVPDQDTAIR</a> |                           |
| 34.1  | 2355.0471 | 0.9916 | <a href="#">GLTFQQNASSMCVPDQDTAIR</a> |                           |

Mascot: <http://www.matrixscience.com/>

# MASCOT SCIENCE Mascot Search Results

## Peptide View

MS/MS Fragmentation of **TVDKSTGKPTLYNVLVMSDTAGTCY**

Found in **P01871** in **con\_Xuniprot\_HUMAN3**, IGHM\_HUMAN Ig mu chain C region OS=Homo sapiens GN=IGHM PE=1 SV=3

Match to Query 25739: 2824.328862 from(942.450230,3+) intensity(2851.9548) rtinseconds(1564) scans(3371) index(102)

Title: 111019\_Est\_ISCardio\_NMI\_200000g\_G\_3Spectrum2915\_scans\_3371

Data file C:\mascot\20140703\_Tmgf\_1D\CSV\_UseAnalysis\MasterCSV\All\_Glyco\mgf\ptm\UC18ERLIC\_PTM\_35D.mgf

Click mouse within plot area to zoom in by factor of two about that point

Or, to Da

Label all possible matches Label matches used for scoring

Show Y-axis

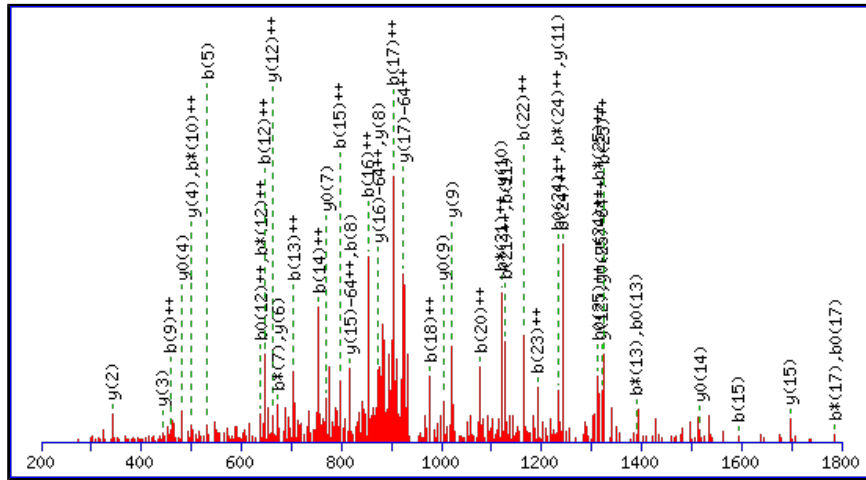

Monoisotopic mass of neutral peptide Mr(calc): 2824.3147

Fixed modifications: Carbamidomethyl (C) (apply to specified residues or termini only)

Variable modifications:

N13 : Deamidated (NQ)

M18 : Oxidation (M), with neutral losses 0.0000(shown in table), 63.9983

Ions Score: 76 Expect: 6.2e-006

Matches : 51/404 fragment ions using 74 most intense peaks ([help](#))

| #  | b         | b <sup>++</sup> | b <sup>*</sup> | b <sup>*++</sup> | b <sup>0</sup> | b <sup>0++</sup> | Seq. | y         | y <sup>++</sup> | y <sup>*</sup> | y <sup>*++</sup> | y <sup>0</sup> | y <sup>0++</sup> | #  |
|----|-----------|-----------------|----------------|------------------|----------------|------------------|------|-----------|-----------------|----------------|------------------|----------------|------------------|----|
| 1  | 102.0550  | 51.5311         |                |                  | 84.0444        | 42.5258          | T    |           |                 |                |                  |                |                  | 26 |
| 2  | 201.1234  | 101.0653        |                |                  | 183.1128       | 92.0600          | V    | 2724.2743 | 1362.6408       | 2707.2477      | 1354.1275        | 2706.2637      | 1353.6355        | 25 |
| 3  | 316.1503  | 158.5788        |                |                  | 298.1397       | 149.5735         | D    | 2625.2059 | 1313.1066       | 2608.1793      | 1304.5933        | 2607.1953      | 1304.1013        | 24 |
| 4  | 444.2453  | 222.6263        | 427.2187       | 214.1130         | 426.2347       | 213.6210         | K    | 2510.1789 | 1255.5931       | 2493.1524      | 1247.0798        | 2492.1684      | 1246.5878        | 23 |
| 5  | 531.2773  | 266.1423        | 514.2508       | 257.6290         | 513.2667       | 257.1370         | S    | 2382.0840 | 1191.5456       | 2365.0574      | 1183.0323        | 2364.0734      | 1182.5403        | 22 |
| 6  | 632.3250  | 316.6661        | 615.2984       | 308.1529         | 614.3144       | 307.6608         | T    | 2295.0519 | 1148.0296       | 2278.0254      | 1139.5163        | 2277.0414      | 1139.0243        | 21 |
| 7  | 689.3464  | 345.1769        | 672.3199       | 336.6636         | 671.3359       | 336.1716         | G    | 2194.0043 | 1097.5058       | 2176.9777      | 1088.9925        | 2175.9937      | 1088.5005        | 20 |
| 8  | 817.4414  | 409.2243        | 800.4149       | 400.7111         | 799.4308       | 400.2191         | K    | 2136.9828 | 1068.9950       | 2119.9562      | 1060.4818        | 2118.9722      | 1059.9897        | 19 |
| 9  | 914.4942  | 457.7507        | 897.4676       | 449.2375         | 896.4836       | 448.7454         | P    | 2008.8878 | 1004.9476       | 1991.8613      | 996.4343         | 1990.8773      | 995.9423         | 18 |
| 10 | 1015.5419 | 508.2746        | 998.5153       | 499.7613         | 997.5313       | 499.2693         | T    | 1911.8351 | 956.4212        | 1894.8085      | 947.9079         | 1893.8245      | 947.4159         | 17 |
| 11 | 1128.6259 | 564.8166        | 1111.5994      | 556.3033         | 1110.6154      | 555.8113         | L    | 1810.7874 | 905.8973        | 1793.7608      | 897.3841         | 1792.7768      | 896.8920         | 16 |
| 12 | 1291.6892 | 646.3483        | 1274.6627      | 637.8350         | 1273.6787      | 637.3430         | Y    | 1697.7033 | 849.3553        | 1680.6768      | 840.8420         | 1679.6928      | 840.3500         | 15 |
| 13 | 1406.7162 | 703.8617        | 1389.6896      | 695.3485         | 1388.7056      | 694.8564         | N    | 1534.6400 | 767.8236        | 1517.6134      | 759.3104         | 1516.6294      | 758.8184         | 14 |
| 14 | 1505.7846 | 753.3959        | 1488.7581      | 744.8827         | 1487.7740      | 744.3907         | V    | 1419.6130 | 710.3102        |                |                  | 1401.6025      | 701.3049         | 13 |
| 15 | 1592.8166 | 796.9120        | 1575.7901      | 788.3987         | 1574.8061      | 787.9067         | S    | 1320.5446 | 660.7760        |                |                  | 1302.5341      | 651.7707         | 12 |
| 16 | 1705.9007 | 853.4540        | 1688.8741      | 844.9407         | 1687.8901      | 844.4487         | L    | 1233.5126 | 617.2599        |                |                  | 1215.5020      | 608.2547         | 11 |
| 17 | 1804.9691 | 902.9882        | 1787.9426      | 894.4749         | 1786.9585      | 893.9829         | V    | 1120.4285 | 560.7179        |                |                  | 1102.4180      | 551.7126         | 10 |
| 18 | 1952.0045 | 976.5059        | 1934.9780      | 967.9926         | 1933.9939      | 967.5006         | M    | 1021.3601 | 511.1837        |                |                  | 1003.3496      | 502.1784         | 9  |
| 19 | 2039.0365 | 1020.0219       | 2022.0100      | 1011.5086        | 2021.0260      | 1011.0166        | S    | 874.3247  | 437.6660        |                |                  | 856.3142       | 428.6607         | 8  |
| 20 | 2154.0635 | 1077.5354       | 2137.0369      | 1069.0221        | 2136.0529      | 1068.5301        | D    | 787.2927  | 394.1500        |                |                  | 769.2821       | 385.1447         | 7  |
| 21 | 2255.1112 | 1128.0592       | 2238.0846      | 1119.5459        | 2237.1006      | 1119.0539        | T    | 672.2658  | 336.6365        |                |                  | 654.2552       | 327.6312         | 6  |
| 22 | 2326.1483 | 1163.5778       | 2309.1217      | 1155.0645        | 2308.1377      | 1154.5725        | A    | 571.2181  | 286.1127        |                |                  | 553.2075       | 277.1074         | 5  |

|    |           |                  |           |                  |           |                  |   |                 |          |  |  |                 |          |   |
|----|-----------|------------------|-----------|------------------|-----------|------------------|---|-----------------|----------|--|--|-----------------|----------|---|
| 23 | 2383.1697 | <b>1192.0885</b> | 2366.1432 | 1183.5752        | 2365.1592 | 1183.0832        | G | <b>500.1810</b> | 250.5941 |  |  | <b>482.1704</b> | 241.5888 | 4 |
| 24 | 2484.2174 | <b>1242.6123</b> | 2467.1909 | <b>1234.0991</b> | 2466.2069 | <b>1233.6071</b> | T | <b>443.1595</b> | 222.0834 |  |  | 425.1489        | 213.0781 | 3 |
| 25 | 2644.2481 | <b>1322.6277</b> | 2627.2215 | <b>1314.1144</b> | 2626.2375 | <b>1313.6224</b> | C | <b>342.1118</b> | 171.5595 |  |  |                 |          | 2 |
| 26 |           |                  |           |                  |           |                  | Y | 182.0812        | 91.5442  |  |  |                 |          | 1 |

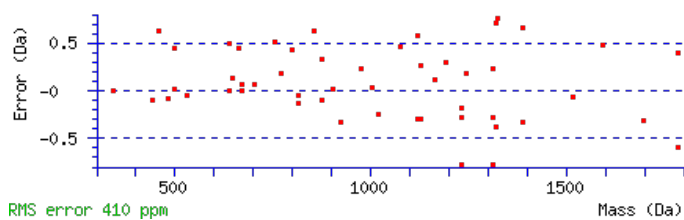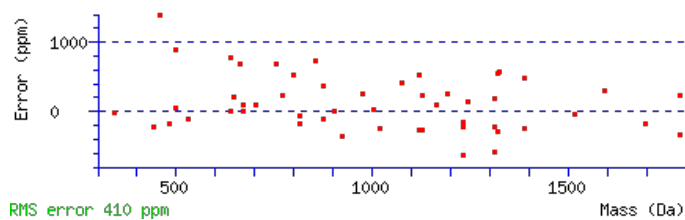

NCBI BLAST search of [TVDKSTGKPTLYNVSLVMSDTAGTCY](#)  
 (Parameters: blastp, nr protein database, expect=20000, no filter, PAM30)  
 Other BLAST [web gateways](#)

All matches to this query

| Score | Mr(calc)  | Delta  | Sequence                                   |
|-------|-----------|--------|--------------------------------------------|
| 75.6  | 2824.3147 | 0.0142 | <a href="#">TVDKSTGKPTLYNVSLVMSDTAGTCY</a> |
| 46.2  | 2823.3307 | 0.9982 | <a href="#">TVDKSTGKPTLYNVSLVMSDTAGTCY</a> |
| 4.0   | 2823.3167 | 1.0122 | <a href="#">NEDGQVNISIGEMVPSRQAFESMLR</a>  |
| 3.6   | 2823.3167 | 1.0121 | <a href="#">DEDGQVNISIGEMVPSRQAFESMLR</a>  |
| 3.5   | 2824.3200 | 0.0089 | <a href="#">SAAMSFYKFATANNQPVAANGELYMK</a> |
| 3.2   | 2823.3208 | 1.0081 | <a href="#">MLGSCVSHATFDDDLPGVGNLSEFKK</a> |
| 3.1   | 2823.3167 | 1.0122 | <a href="#">NEDGQVNISIGEMVPSRQAFESMLR</a>  |
| 2.7   | 2823.3360 | 0.9929 | <a href="#">SAAMSFYKFATANNQPVAANGELYMK</a> |
| 2.3   | 2824.3214 | 0.0075 | <a href="#">GHFYMYAGSLLLKMGQHGNNVQWR</a>   |
| 1.9   | 2824.3200 | 0.0089 | <a href="#">SAAMSFYKFATANNQPVAANGELYMK</a> |

Mascot: <http://www.matrixscience.com/>

# MASCOT SCIENCE Mascot Search Results

## Peptide View

MS/MS Fragmentation of **GLTFQQNASSMCVDPDQTAIR**

Found in **P01871** in **con\_Xuniprot\_HUMAN3**, IGHM\_HUMAN Ig mu chain C region OS=Homo sapiens GN=IGHM PE=1 SV=3

Match to Query 17870: 2356.039868 from(1179.027210,2+) intensity(19703.2813) rtinseconds(1086) scans(2704) index(6284)

Title: 111019\_Est\_ISCardio\_NMI\_YP\_G\_9Spectrum2375\_scans\_\_2704

Data file C:\mascot\20140703\_Tmgf\_1D\CSV\_UseAnalysis\MasterCSV\All\_Glyco\mgf\ptm\UC18ERLIC\_PTM\_35D.mgf

Click mouse within plot area to zoom in by factor of two about that point

Or,  to  Da

Label all possible matches  Label matches used for scoring

Show Y-axis

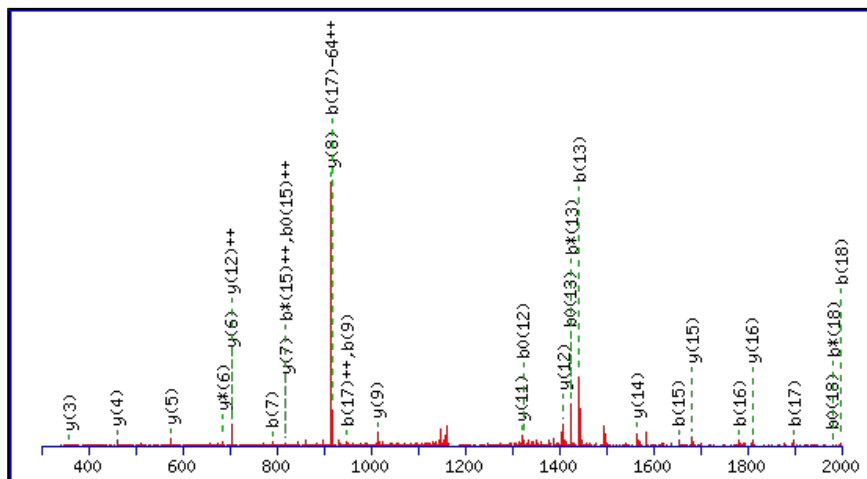

Monoisotopic mass of neutral peptide Mr(calc): 2356.0311

Fixed modifications: Carbamidomethyl (C) (apply to specified residues or termini only)

Variable modifications:

Q6 : Deamidated (NQ)

N7 : Deamidated (NQ)

M11 : Oxidation (M), with neutral losses 0.0000(shown in table), 63.9983

Ions Score: 73 Expect: 5.5e-006

Matches : 30/342 fragment ions using 51 most intense peaks ([help](#))

| #  | b                | b <sup>++</sup> | b <sup>*</sup>   | b <sup>*++</sup> | b <sup>0</sup>   | b <sup>0++</sup> | Seq. | y                | y <sup>++</sup> | y <sup>*</sup>  | y <sup>*++</sup> | y <sup>0</sup> | y <sup>0++</sup> | #  |
|----|------------------|-----------------|------------------|------------------|------------------|------------------|------|------------------|-----------------|-----------------|------------------|----------------|------------------|----|
| 1  | 58.0287          | 29.5180         |                  |                  |                  |                  | G    |                  |                 |                 |                  |                |                  | 21 |
| 2  | 171.1128         | 86.0600         |                  |                  |                  |                  | L    | 2300.0169        | 1150.5121       | 2282.9904       | 1141.9988        | 2282.0064      | 1141.5068        | 20 |
| 3  | 272.1605         | 136.5839        |                  |                  | 254.1499         | 127.5786         | T    | 2186.9329        | 1093.9701       | 2169.9063       | 1085.4568        | 2168.9223      | 1084.9648        | 19 |
| 4  | 419.2289         | 210.1181        |                  |                  | 401.2183         | 201.1128         | F    | 2085.8852        | 1043.4462       | 2068.8587       | 1034.9330        | 2067.8746      | 1034.4410        | 18 |
| 5  | 547.2875         | 274.1474        | 530.2609         | 265.6341         | 529.2769         | 265.1421         | Q    | 1938.8168        | 969.9120        | 1921.7902       | 961.3988         | 1920.8062      | 960.9067         | 17 |
| 6  | 676.3301         | 338.6687        | 659.3035         | 330.1554         | 658.3195         | 329.6634         | Q    | <b>1810.7582</b> | 905.8827        | 1793.7317       | 897.3695         | 1792.7476      | 896.8775         | 16 |
| 7  | <b>791.3570</b>  | 396.1821        | 774.3305         | 387.6689         | 773.3464         | 387.1769         | N    | <b>1681.7156</b> | 841.3614        | 1664.6891       | 832.8482         | 1663.7050      | 832.3562         | 15 |
| 8  | 862.3941         | 431.7007        | 845.3676         | 423.1874         | 844.3836         | 422.6954         | A    | <b>1566.6887</b> | 783.8480        | 1549.6621       | 775.3347         | 1548.6781      | 774.8427         | 14 |
| 9  | <b>949.4262</b>  | 475.2167        | 932.3996         | 466.7034         | 931.4156         | 466.2114         | S    | 1495.6516        | 748.3294        | 1478.6250       | 739.8161         | 1477.6410      | 739.3241         | 13 |
| 10 | 1036.4582        | 518.7327        | 1019.4316        | 510.2195         | 1018.4476        | 509.7274         | S    | <b>1408.6195</b> | <b>704.8134</b> | 1391.5930       | 696.3001         | 1390.6090      | 695.8081         | 12 |
| 11 | 1183.4936        | 592.2504        | 1166.4670        | 583.7372         | 1165.4830        | 583.2451         | M    | <b>1321.5875</b> | 661.2974        | 1304.5610       | 652.7841         | 1303.5769      | 652.2921         | 11 |
| 12 | 1343.5242        | 672.2658        | 1326.4977        | 663.7525         | <b>1325.5137</b> | 663.2605         | C    | 1174.5521        | 587.7797        | 1157.5256       | 579.2664         | 1156.5415      | 578.7744         | 10 |
| 13 | <b>1442.5926</b> | 721.8000        | <b>1425.5661</b> | 713.2867         | <b>1424.5821</b> | 712.7947         | V    | <b>1014.5215</b> | 507.7644        | 997.4949        | 499.2511         | 996.5109       | 498.7591         | 9  |
| 14 | 1539.6454        | 770.3263        | 1522.6189        | 761.8131         | 1521.6348        | 761.3211         | P    | <b>915.4530</b>  | 458.2302        | 898.4265        | 449.7169         | 897.4425       | 449.2249         | 8  |
| 15 | <b>1654.6724</b> | 827.8398        | 1637.6458        | <b>819.3265</b>  | 1636.6618        | <b>818.8345</b>  | D    | <b>818.4003</b>  | 409.7038        | 801.3737        | 401.1905         | 800.3897       | 400.6985         | 7  |
| 16 | <b>1782.7309</b> | 891.8691        | 1765.7044        | 883.3558         | 1764.7204        | 882.8638         | Q    | <b>703.3733</b>  | 352.1903        | <b>686.3468</b> | 343.6770         | 685.3628       | 343.1850         | 6  |
| 17 | <b>1897.7579</b> | <b>949.3826</b> | 1880.7313        | 940.8693         | 1879.7473        | 940.3773         | D    | <b>575.3148</b>  | 288.1610        | 558.2882        | 279.6477         | 557.3042       | 279.1557         | 5  |
| 18 | <b>1998.8056</b> | 999.9064        | <b>1981.7790</b> | 991.3931         | <b>1980.7950</b> | 990.9011         | T    | <b>460.2878</b>  | 230.6475        | 443.2613        | 222.1343         | 442.2772       | 221.6423         | 4  |
| 19 | 2069.8427        | 1035.4250       | 2052.8161        | 1026.9117        | 2051.8321        | 1026.4197        | A    | <b>359.2401</b>  | 180.1237        | 342.2136        | 171.6104         |                |                  | 3  |
| 20 | 2182.9267        | 1091.9670       | 2165.9002        | 1083.4537        | 2164.9162        | 1082.9617        | I    | 288.2030         | 144.6051        | 271.1765        | 136.0919         |                |                  | 2  |
| 21 |                  |                 |                  |                  |                  |                  | R    | 175.1190         | 88.0631         | 158.0924        | 79.5498          |                |                  | 1  |

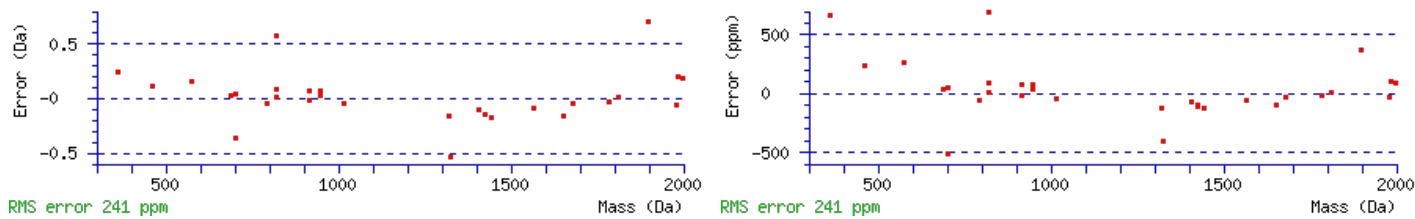

NCBI BLAST search of [GLTFQQNASSMCVPDQDTAIR](#)  
 (Parameters: blastp, nr protein database, expect=20000, no filter, PAM30)  
 Other BLAST [web gateways](#)

**All matches to this query**

| Score | Mr(calc)  | Delta  | Sequence                              | Site Analysis            |
|-------|-----------|--------|---------------------------------------|--------------------------|
| 73.1  | 2356.0311 | 0.0087 | <a href="#">GLTFQQNASSMCVPDQDTAIR</a> | Deamidated Q6, N7 84.08% |
| 61.8  | 2356.0311 | 0.0087 | <a href="#">GLTFQQNASSMCVPDQDTAIR</a> | Deamidated Q5, N7 6.20%  |
| 60.7  | 2356.0311 | 0.0087 | <a href="#">GLTFQQNASSMCVPDQDTAIR</a> | Deamidated N7, Q16 4.79% |
| 59.7  | 2356.0311 | 0.0087 | <a href="#">GLTFQQNASSMCVPDQDTAIR</a> | Deamidated Q6, Q16 3.80% |
| 51.5  | 2356.0311 | 0.0087 | <a href="#">GLTFQQNASSMCVPDQDTAIR</a> | Deamidated Q5, Q16 0.57% |
| 51.3  | 2356.0311 | 0.0087 | <a href="#">GLTFQQNASSMCVPDQDTAIR</a> | Deamidated Q5, Q6 0.55%  |
| 48.4  | 2355.0471 | 0.9927 | <a href="#">GLTFQQNASSMCVPDQDTAIR</a> |                          |
| 39.0  | 2355.0471 | 0.9927 | <a href="#">GLTFQQNASSMCVPDQDTAIR</a> |                          |
| 38.1  | 2355.0471 | 0.9927 | <a href="#">GLTFQQNASSMCVPDQDTAIR</a> |                          |
| 22.8  | 2355.0471 | 0.9927 | <a href="#">GLTFQQNASSMCVPDQDTAIR</a> |                          |

Mascot: <http://www.matrixscience.com/>

# MATRIX SCIENCE Mascot Search Results

## Peptide View

MS/MS Fragmentation of **GLTFQQNASSMCVDPDQDAIR**

Found in **P01871** in **con\_Xuniprot\_HUMAN3**, IGHM\_HUMAN Ig mu chain C region OS=Homo sapiens GN=IGHM PE=1 SV=3

Match to Query 15490: 2340.041922 from(781.021250,3+) intensity(66153.5391) rtinseconds(1574) scans(3900) index(2008)

Title: 111019\_Est\_ISCardio\_NMI\_YP\_G\_4Spectrum3357\_scans\_\_3900

Data file C:\mascot\20140703\_Tmgf\_1D\CSV\_UseAnalysis\MasterCSV\All\_Glyco\mgf\ptm\UC18ERLIC\_PTM\_35D.mgf

Click mouse within plot area to zoom in by factor of two about that point

Or, to Da

Label all possible matches Label matches used for scoring

Show Y-axis

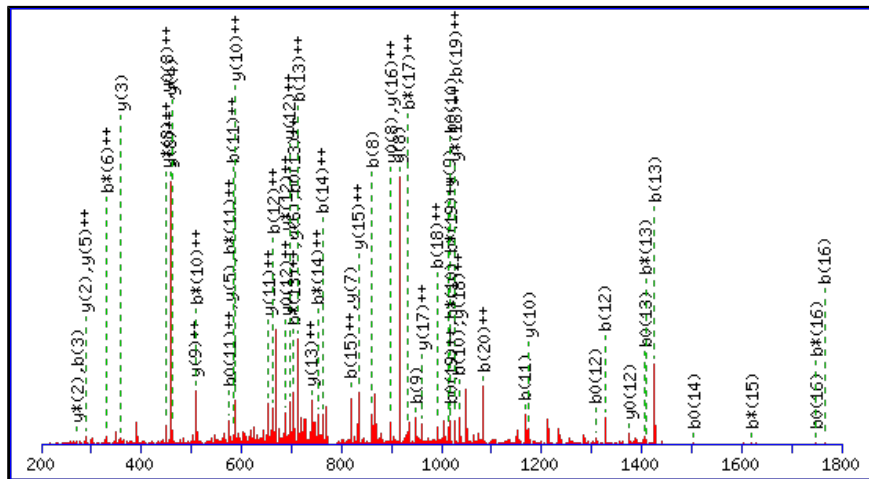

Monoisotopic mass of neutral peptide Mr(calc): 2340.0362

Fixed modifications: Carbamidomethyl (C) (apply to specified residues or termini only)

Variable modifications:

N7 : Deamidated (NQ)

Q16 : Deamidated (NQ)

Ions Score: 46 Expect: 0.0033

Matches : 63/222 fragment ions using 123 most intense peaks ([help](#))

| #  | b                | b <sup>++</sup>  | b <sup>*</sup>   | b <sup>*++</sup> | b <sup>0</sup>   | b <sup>0++</sup> | Seq.     | y                | y <sup>++</sup>  | y <sup>*</sup>  | y <sup>*++</sup> | y <sup>0</sup>   | y <sup>0++</sup> | #  |
|----|------------------|------------------|------------------|------------------|------------------|------------------|----------|------------------|------------------|-----------------|------------------|------------------|------------------|----|
| 1  | 58.0287          | 29.5180          |                  |                  |                  |                  | <b>G</b> |                  |                  |                 |                  |                  |                  | 21 |
| 2  | 171.1128         | 86.0600          |                  |                  |                  |                  | <b>L</b> | 2284.0220        | 1142.5147        | 2266.9955       | 1134.0014        | 2266.0115        | 1133.5094        | 20 |
| 3  | <b>272.1605</b>  | 136.5839         |                  |                  | 254.1499         | 127.5786         | <b>T</b> | 2170.9380        | 1085.9726        | 2153.9114       | 1077.4593        | 2152.9274        | 1076.9673        | 19 |
| 4  | 419.2289         | 210.1181         |                  |                  | 401.2183         | 201.1128         | <b>F</b> | 2069.8903        | <b>1035.4488</b> | 2052.8637       | <b>1026.9355</b> | 2051.8797        | 1026.4435        | 18 |
| 5  | 547.2875         | 274.1474         | 530.2609         | 265.6341         | 529.2769         | 265.1421         | <b>Q</b> | 1922.8219        | <b>961.9146</b>  | 1905.7953       | 953.4013         | 1904.8113        | 952.9093         | 17 |
| 6  | 675.3461         | 338.1767         | 658.3195         | <b>329.6634</b>  | 657.3355         | 329.1714         | <b>Q</b> | 1794.7633        | <b>897.8853</b>  | 1777.7367       | 889.3720         | 1776.7527        | 888.8800         | 16 |
| 7  | 790.3730         | 395.6901         | 773.3464         | 387.1769         | 772.3624         | 386.6849         | <b>N</b> | 1666.7047        | <b>833.8560</b>  | 1649.6782       | 825.3427         | 1648.6941        | 824.8507         | 15 |
| 8  | <b>861.4101</b>  | 431.2087         | 844.3836         | 422.6954         | 843.3995         | 422.2034         | <b>A</b> | 1551.6778        | 776.3425         | 1534.6512       | 767.8292         | 1533.6672        | 767.3372         | 14 |
| 9  | <b>948.4421</b>  | 474.7247         | 931.4156         | 466.2114         | 930.4316         | 465.7194         | <b>S</b> | 1480.6407        | <b>740.8240</b>  | 1463.6141       | 732.3107         | 1462.6301        | 731.8187         | 13 |
| 10 | <b>1035.4742</b> | 518.2407         | <b>1018.4476</b> | <b>509.7274</b>  | <b>1017.4636</b> | 509.2354         | <b>S</b> | 1393.6086        | <b>697.3080</b>  | 1376.5821       | <b>688.7947</b>  | <b>1375.5981</b> | <b>688.3027</b>  | 12 |
| 11 | <b>1166.5147</b> | <b>583.7610</b>  | 1149.4881        | <b>575.2477</b>  | 1148.5041        | <b>574.7557</b>  | <b>M</b> | 1306.5766        | <b>653.7919</b>  | 1289.5501       | 645.2787         | 1288.5660        | 644.7867         | 11 |
| 12 | <b>1326.5453</b> | <b>663.7763</b>  | 1309.5188        | 655.2630         | <b>1308.5347</b> | 654.7710         | <b>C</b> | <b>1175.5361</b> | <b>588.2717</b>  | 1158.5096       | 579.7584         | 1157.5256        | 579.2664         | 10 |
| 13 | <b>1425.6137</b> | <b>713.3105</b>  | <b>1408.5872</b> | <b>704.7972</b>  | <b>1407.6031</b> | <b>704.3052</b>  | <b>V</b> | <b>1015.5055</b> | <b>508.2564</b>  | 998.4789        | 499.7431         | 997.4949         | 499.2511         | 9  |
| 14 | 1522.6665        | <b>761.8369</b>  | 1505.6399        | <b>753.3236</b>  | <b>1504.6559</b> | 752.8316         | <b>P</b> | <b>916.4371</b>  | <b>458.7222</b>  | 899.4105        | <b>450.2089</b>  | <b>898.4265</b>  | <b>449.7169</b>  | 8  |
| 15 | 1637.6934        | <b>819.3503</b>  | <b>1620.6669</b> | 810.8371         | 1619.6829        | 810.3451         | <b>D</b> | <b>819.3843</b>  | 410.1958         | 802.3577        | 401.6825         | 801.3737         | 401.1905         | 7  |
| 16 | <b>1766.7360</b> | 883.8716         | <b>1749.7095</b> | 875.3584         | <b>1748.7255</b> | 874.8664         | <b>Q</b> | <b>704.3573</b>  | 352.6823         | 687.3308        | 344.1690         | 686.3468         | 343.6770         | 6  |
| 17 | 1881.7630        | 941.3851         | 1864.7364        | <b>932.8718</b>  | 1863.7524        | 932.3798         | <b>D</b> | <b>575.3148</b>  | <b>288.1610</b>  | 558.2882        | 279.6477         | 557.3042         | 279.1557         | 5  |
| 18 | 1982.8106        | <b>991.9090</b>  | 1965.7841        | 983.3957         | 1964.8001        | 982.9037         | <b>T</b> | <b>460.2878</b>  | 230.6475         | 443.2613        | 222.1343         | 442.2772         | 221.6423         | 4  |
| 19 | 2053.8478        | <b>1027.4275</b> | 2036.8212        | <b>1018.9142</b> | 2035.8372        | <b>1018.4222</b> | <b>A</b> | <b>359.2401</b>  | 180.1237         | 342.2136        | 171.6104         |                  |                  | 3  |
| 20 | 2166.9318        | <b>1083.9695</b> | 2149.9053        | 1075.4563        | 2148.9213        | 1074.9643        | <b>I</b> | <b>288.2030</b>  | 144.6051         | <b>271.1765</b> | 136.0919         |                  |                  | 2  |
| 21 |                  |                  |                  |                  |                  |                  | <b>R</b> | 175.1190         | 88.0631          | 158.0924        | 79.5498          |                  |                  | 1  |

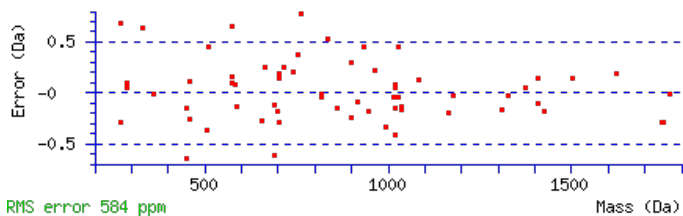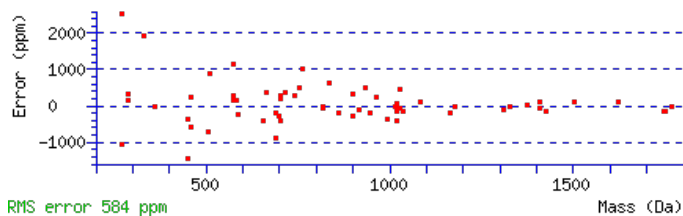

NCBI BLAST search of [GLTFQQNASSMCVPDQDTAIR](#)  
 (Parameters: blastp, nr protein database, expect=20000, no filter, PAM30)  
 Other BLAST [web gateways](#)

All matches to this query

| Score | Mr(calc)  | Delta  | Sequence                              | Site Analysis             |
|-------|-----------|--------|---------------------------------------|---------------------------|
| 45.7  | 2340.0362 | 0.0057 | <a href="#">GLTFQQNASSMCVPDQDTAIR</a> | Deamidated N7, Q16 50.74% |
| 39.5  | 2340.0362 | 0.0057 | <a href="#">GLTFQQNASSMCVPDQDTAIR</a> | Deamidated Q6, Q16 12.12% |
| 39.5  | 2340.0362 | 0.0057 | <a href="#">GLTFQQNASSMCVPDQDTAIR</a> | Deamidated Q5, Q16 12.12% |
| 37.8  | 2340.0362 | 0.0057 | <a href="#">GLTFQQNASSMCVPDQDTAIR</a> | Deamidated Q6, N7 8.34%   |
| 37.8  | 2340.0362 | 0.0057 | <a href="#">GLTFQQNASSMCVPDQDTAIR</a> | Deamidated Q5, N7 8.34%   |
| 37.8  | 2340.0362 | 0.0057 | <a href="#">GLTFQQNASSMCVPDQDTAIR</a> | Deamidated Q5, Q6 8.34%   |
| 7.1   | 2339.0337 | 1.0082 | <a href="#">ENFNMMNALDQLPKPFSNPK</a>  |                           |
| 3.3   | 2338.0464 | 1.9956 | <a href="#">DQSPQIVFVEYDAFMQTER</a>   |                           |
| 3.3   | 2338.0464 | 1.9956 | <a href="#">DQSPQIVFVEYDAFMQTER</a>   |                           |
| 2.1   | 2339.0376 | 1.0044 | <a href="#">EWQDKFVDMNQAVKSQPR</a>    |                           |

Mascot: <http://www.matrixscience.com/>



# MASCOT SCIENCE Mascot Search Results

## Peptide View

MS/MS Fragmentation of **THTNISESHPNATFSAVGEASICEDDWNSGER**

Found in **P01871** in **con\_Xuniprot\_HUMAN3**, IGHM\_HUMAN Ig mu chain C region OS=Homo sapiens GN=IGHM PE=1 SV=3

Match to Query 27795: 3520.502376 from(881.132870,4+) intensity(0.0000) rtinseconds(2130) scans(5505) index(1483)

Title: 111019\_Est\_ISCardio\_NMI\_YP\_G\_3Spectrum4813\_scans\_\_5505

Data file C:\mascot\20140703\_Tmgf\_1D\CSV\_UseAnalysis\MasterCSV\All\_Glyco\mgf\ptm\UC18ERLIC\_PTM\_35D.mgf

Click mouse within plot area to zoom in by factor of two about that point

Or,  to  Da

Label all possible matches  Label matches used for scoring

Show Y-axis

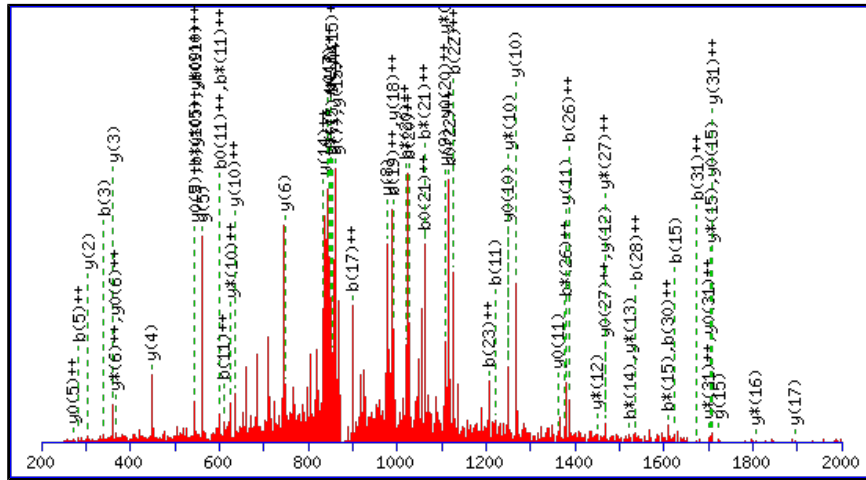

Monoisotopic mass of neutral peptide Mr(calc): 3518.4917

Fixed modifications: Carbamidomethyl (C) (apply to specified residues or termini only)

Variable modifications:

N11 : Deamidated (NQ)

Ions Score: 35 Expect: 0.016

Matches : 70/364 fragment ions using 138 most intense peaks ([help](#))

| #  | b         | b <sup>++</sup> | b <sup>*</sup> | b <sup>*++</sup> | b <sup>0</sup> | b <sup>0++</sup> | Seq. | y         | y <sup>++</sup> | y <sup>*</sup> | y <sup>*++</sup> | y <sup>0</sup> | y <sup>0++</sup> | #  |
|----|-----------|-----------------|----------------|------------------|----------------|------------------|------|-----------|-----------------|----------------|------------------|----------------|------------------|----|
| 1  | 102.0550  | 51.5311         |                |                  | 84.0444        | 42.5258          | T    |           |                 |                |                  |                |                  | 32 |
| 2  | 239.1139  | 120.0606        |                |                  | 221.1033       | 111.0553         | H    | 3418.4513 | 1709.7293       | 3401.4247      | 1701.2160        | 3400.4407      | 1700.7240        | 31 |
| 3  | 340.1615  | 170.5844        |                |                  | 322.1510       | 161.5791         | T    | 3281.3924 | 1641.1998       | 3264.3658      | 1632.6865        | 3263.3818      | 1632.1945        | 30 |
| 4  | 454.2045  | 227.6059        | 437.1779       | 219.0926         | 436.1939       | 218.6006         | N    | 3180.3447 | 1590.6760       | 3163.3181      | 1582.1627        | 3162.3341      | 1581.6707        | 29 |
| 5  | 567.2885  | 284.1479        | 550.2620       | 275.6346         | 549.2780       | 275.1426         | I    | 3066.3018 | 1533.6545       | 3049.2752      | 1525.1412        | 3048.2912      | 1524.6492        | 28 |
| 6  | 654.3206  | 327.6639        | 637.2940       | 319.1506         | 636.3100       | 318.6586         | S    | 2953.2177 | 1477.1125       | 2936.1911      | 1468.5992        | 2935.2071      | 1468.1072        | 27 |
| 7  | 783.3632  | 392.1852        | 766.3366       | 383.6719         | 765.3526       | 383.1799         | E    | 2866.1857 | 1433.5965       | 2849.1591      | 1425.0832        | 2848.1751      | 1424.5912        | 26 |
| 8  | 870.3952  | 435.7012        | 853.3686       | 427.1880         | 852.3846       | 426.6959         | S    | 2737.1431 | 1369.0752       | 2720.1165      | 1360.5619        | 2719.1325      | 1360.0699        | 25 |
| 9  | 1007.4541 | 504.2307        | 990.4275       | 495.7174         | 989.4435       | 495.2254         | H    | 2650.1111 | 1325.5592       | 2633.0845      | 1317.0459        | 2632.1005      | 1316.5539        | 24 |
| 10 | 1104.5069 | 552.7571        | 1087.4803      | 544.2438         | 1086.4963      | 543.7518         | P    | 2513.0521 | 1257.0297       | 2496.0256      | 1248.5164        | 2495.0416      | 1248.0244        | 23 |
| 11 | 1219.5338 | 610.2705        | 1202.5073      | 601.7573         | 1201.5232      | 601.2653         | N    | 2415.9994 | 1208.5033       | 2398.9728      | 1199.9901        | 2397.9888      | 1199.4980        | 22 |
| 12 | 1290.5709 | 645.7891        | 1273.5444      | 637.2758         | 1272.5604      | 636.7838         | A    | 2300.9724 | 1150.9899       | 2283.9459      | 1142.4766        | 2282.9619      | 1141.9846        | 21 |
| 13 | 1391.6186 | 696.3129        | 1374.5920      | 687.7997         | 1373.6080      | 687.3077         | T    | 2229.9353 | 1115.4713       | 2212.9088      | 1106.9580        | 2211.9248      | 1106.4660        | 20 |
| 14 | 1538.6870 | 769.8471        | 1521.6605      | 761.3339         | 1520.6764      | 760.8419         | F    | 2128.8876 | 1064.9475       | 2111.8611      | 1056.4342        | 2110.8771      | 1055.9422        | 19 |
| 15 | 1625.7190 | 813.3632        | 1608.6925      | 804.8499         | 1607.7085      | 804.3579         | S    | 1981.8192 | 991.4133        | 1964.7927      | 982.9000         | 1963.8087      | 982.4080         | 18 |
| 16 | 1696.7562 | 848.8817        | 1679.7296      | 840.3684         | 1678.7456      | 839.8764         | A    | 1894.7872 | 947.8972        | 1877.7606      | 939.3840         | 1876.7766      | 938.8920         | 17 |
| 17 | 1795.8246 | 898.4159        | 1778.7980      | 889.9026         | 1777.8140      | 889.4106         | V    | 1823.7501 | 912.3787        | 1806.7235      | 903.8654         | 1805.7395      | 903.3734         | 16 |
| 18 | 1852.8460 | 926.9267        | 1835.8195      | 918.4134         | 1834.8355      | 917.9214         | G    | 1724.6817 | 862.8445        | 1707.6551      | 854.3312         | 1706.6711      | 853.8392         | 15 |
| 19 | 1981.8886 | 991.4480        | 1964.8621      | 982.9347         | 1963.8781      | 982.4427         | E    | 1667.6602 | 834.3337        | 1650.6337      | 825.8205         | 1649.6496      | 825.3285         | 14 |
| 20 | 2052.9257 | 1026.9665       | 2035.8992      | 1018.4532        | 2034.9152      | 1017.9612        | A    | 1538.6176 | 769.8124        | 1521.5911      | 761.2992         | 1520.6070      | 760.8072         | 13 |
| 21 | 2139.9578 | 1070.4825       | 2122.9312      | 1061.9692        | 2121.9472      | 1061.4772        | S    | 1467.5805 | 734.2939        | 1450.5539      | 725.7806         | 1449.5699      | 725.2886         | 12 |
| 22 | 2253.0418 | 1127.0246       | 2236.0153      | 1118.5113        | 2235.0313      | 1118.0193        | I    | 1380.5485 | 690.7779        | 1363.5219      | 682.2646         | 1362.5379      | 681.7726         | 11 |
| 23 | 2413.0725 | 1207.0399       | 2396.0459      | 1198.5266        | 2395.0619      | 1198.0346        | C    | 1267.4644 | 634.2358        | 1250.4379      | 625.7226         | 1249.4538      | 625.2306         | 10 |

|    |           |                  |           |                  |           |           |   |                  |          |                 |                 |                 |                 |   |
|----|-----------|------------------|-----------|------------------|-----------|-----------|---|------------------|----------|-----------------|-----------------|-----------------|-----------------|---|
| 24 | 2542.1151 | 1271.5612        | 2525.0885 | 1263.0479        | 2524.1045 | 1262.5559 | E | <b>1107.4338</b> | 554.2205 | 1090.4072       | <b>545.7072</b> | 1089.4232       | <b>545.2152</b> | 9 |
| 25 | 2657.1420 | 1329.0746        | 2640.1155 | 1320.5614        | 2639.1315 | 1320.0694 | D | <b>978.3912</b>  | 489.6992 | 961.3646        | 481.1859        | 960.3806        | 480.6939        | 8 |
| 26 | 2772.1690 | <b>1386.5881</b> | 2755.1424 | <b>1378.0748</b> | 2754.1584 | 1377.5828 | D | <b>863.3642</b>  | 432.1857 | <b>846.3377</b> | 423.6725        | <b>845.3537</b> | 423.1805        | 7 |
| 27 | 2958.2483 | 1479.6278        | 2941.2217 | 1471.1145        | 2940.2377 | 1470.6225 | W | <b>748.3373</b>  | 374.6723 | 731.3107        | <b>366.1590</b> | 730.3267        | <b>365.6670</b> | 6 |
| 28 | 3072.2912 | <b>1536.6492</b> | 3055.2647 | 1528.1360        | 3054.2806 | 1527.6440 | N | <b>562.2580</b>  | 281.6326 | <b>545.2314</b> | 273.1193        | <b>544.2474</b> | <b>272.6273</b> | 5 |
| 29 | 3159.3232 | 1580.1653        | 3142.2967 | 1571.6520        | 3141.3127 | 1571.1600 | S | <b>448.2150</b>  | 224.6112 | 431.1885        | 216.0979        | 430.2045        | 215.6059        | 4 |
| 30 | 3216.3447 | <b>1608.6760</b> | 3199.3181 | 1600.1627        | 3198.3341 | 1599.6707 | G | <b>361.1830</b>  | 181.0951 | 344.1565        | 172.5819        | 343.1724        | 172.0899        | 3 |
| 31 | 3345.3873 | <b>1673.1973</b> | 3328.3607 | 1664.6840        | 3327.3767 | 1664.1920 | E | <b>304.1615</b>  | 152.5844 | 287.1350        | 144.0711        | 286.1510        | 143.5791        | 2 |
| 32 |           |                  |           |                  |           |           | R | 175.1190         | 88.0631  | 158.0924        | 79.5498         |                 |                 | 1 |

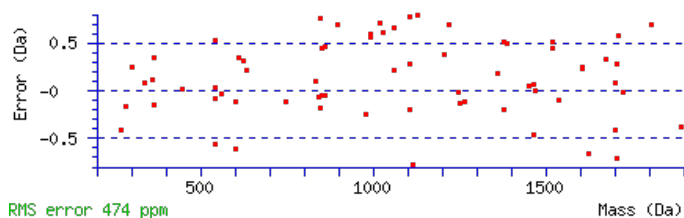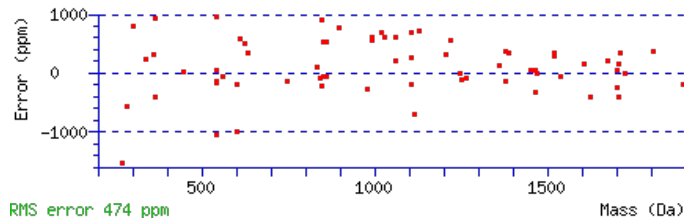

NCBI BLAST search of [THTNISESHPNATFSAVGEASICEDDWNSGER](#)  
 (Parameters: blastp, nr protein database, expect=20000, no filter, PAM30)  
 Other BLAST [web gateways](#)

All matches to this query

| Score | Mr(calc)  | Delta  | Sequence                                           | Site Analysis         |
|-------|-----------|--------|----------------------------------------------------|-----------------------|
| 35.4  | 3518.4917 | 2.0107 | <a href="#">THTNISESHPNATFSAVGEASICEDDWNSGER</a>   | Deamidated N11 49.97% |
| 35.4  | 3518.4917 | 2.0107 | <a href="#">THTNISESHPNATFSAVGEASICEDDWNSGER</a>   | Deamidated N4 49.97%  |
| 6.3   | 3520.4880 | 0.0143 | <a href="#">RSNGQGGAASSESTDSCASQTELLDFDSADSGRR</a> |                       |
| 6.1   | 3520.4880 | 0.0143 | <a href="#">RSNGQGGAASSESTDSCASQTELLDFDSADSGRR</a> |                       |
| 5.5   | 3518.4917 | 2.0107 | <a href="#">THTNISESHPNATFSAVGEASICEDDWDSGER</a>   |                       |
| 5.5   | 3518.4917 | 2.0107 | <a href="#">THTNISESHPNATFSAVGEASICEDDWNSGER</a>   | Deamidated N28 0.05%  |
| 3.6   | 3518.4968 | 2.0055 | <a href="#">DGVCTKPMTCPKSMTYHYHVSTCQPTCR</a>       |                       |

Mascot: <http://www.matrixscience.com/>

# MATRIX SCIENCE Mascot Search Results

## Peptide View

MS/MS Fragmentation of **LSLHRPALEDLLLGSEANLTCTLGLR**

Found in **P01876** in **con\_Xuniprot\_HUMAN3**, IGHA1\_HUMAN Ig alpha-1 chain C region OS=Homo sapiens GN=IGHA1 PE=1 SV=2

Match to Query 26995: 2963.587512 from(988.869780,3+) intensity(2124766.7500) rtinseconds(2632) scans(6704) index(8117)

Title: 111019\_Est\_ISCardio\_NMI\_YS\_G\_2Spectrum5812\_scans\_\_6704

Data file C:\mascot\20140703\_Tmgf\_1D\CSV\_UseAnalysis\MasterCSV\All\_Glyco\mgf\ptm\UC18ERLIC\_PTM\_35D.mgf

Click mouse within plot area to zoom in by factor of two about that point

Or, to Da

Label all possible matches Label matches used for scoring

Show Y-axis

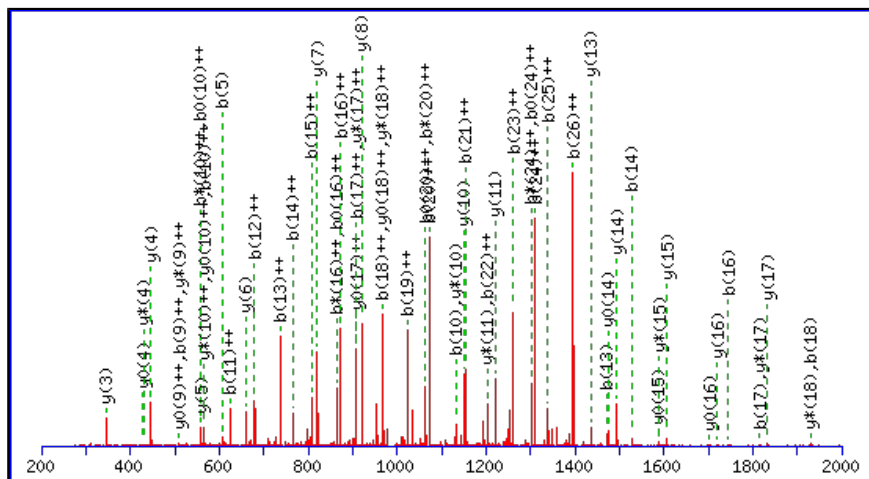

Monoisotopic mass of neutral peptide Mr(calc): 2963.5750

Fixed modifications: Carbamidomethyl (C) (apply to specified residues or termini only)

Variable modifications:

N18 : Deamidated (NQ)

Ions Score: 140 Expect: 1.1e-012

Matches : 64/296 fragment ions using 69 most intense peaks ([help](#))

| #  | b                | b <sup>++</sup>  | b <sup>*</sup> | b <sup>*++</sup> | b <sup>0</sup> | b <sup>0++</sup> | Seq. | y                | y <sup>++</sup> | y <sup>*</sup>   | y <sup>*++</sup> | y <sup>0</sup>   | y <sup>0++</sup> | #  |
|----|------------------|------------------|----------------|------------------|----------------|------------------|------|------------------|-----------------|------------------|------------------|------------------|------------------|----|
| 1  | 114.0913         | 57.5493          |                |                  |                |                  | L    |                  |                 |                  |                  |                  |                  | 27 |
| 2  | 201.1234         | 101.0653         |                |                  | 183.1128       | 92.0600          | S    | 2851.4982        | 1426.2527       | 2834.4717        | 1417.7395        | 2833.4877        | 1417.2475        | 26 |
| 3  | 314.2074         | 157.6074         |                |                  | 296.1969       | 148.6021         | L    | 2764.4662        | 1382.7367       | 2747.4396        | 1374.2235        | 2746.4556        | 1373.7315        | 25 |
| 4  | 451.2663         | 226.1368         |                |                  | 433.2558       | 217.1315         | H    | 2651.3821        | 1326.1947       | 2634.3556        | 1317.6814        | 2633.3716        | 1317.1894        | 24 |
| 5  | <b>607.3675</b>  | 304.1874         | 590.3409       | 295.6741         | 589.3569       | 295.1821         | R    | 2514.3232        | 1257.6652       | 2497.2967        | 1249.1520        | 2496.3127        | 1248.6600        | 23 |
| 6  | 704.4202         | 352.7137         | 687.3937       | 344.2005         | 686.4097       | 343.7085         | P    | 2358.2221        | 1179.6147       | 2341.1956        | 1171.1014        | 2340.2115        | 1170.6094        | 22 |
| 7  | 775.4573         | 388.2323         | 758.4308       | 379.7190         | 757.4468       | 379.2270         | A    | 2261.1693        | 1131.0883       | 2244.1428        | 1122.5750        | 2243.1588        | 1122.0830        | 21 |
| 8  | 888.5414         | 444.7743         | 871.5148       | 436.2611         | 870.5308       | 435.7691         | L    | 2190.1322        | 1095.5698       | 2173.1057        | 1087.0565        | 2172.1217        | 1086.5645        | 20 |
| 9  | 1017.5840        | <b>509.2956</b>  | 1000.5574      | 500.7824         | 999.5734       | 500.2904         | E    | 2077.0482        | 1039.0277       | 2060.0216        | 1030.5144        | 2059.0376        | 1030.0224        | 19 |
| 10 | <b>1132.6109</b> | <b>566.8091</b>  | 1115.5844      | <b>558.2958</b>  | 1114.6004      | <b>557.8038</b>  | D    | 1948.0056        | 974.5064        | <b>1930.9790</b> | <b>965.9931</b>  | 1929.9950        | <b>965.5011</b>  | 18 |
| 11 | 1245.6950        | <b>623.3511</b>  | 1228.6684      | 614.8379         | 1227.6844      | 614.3459         | L    | <b>1832.9786</b> | 916.9930        | <b>1815.9521</b> | <b>908.4797</b>  | 1814.9681        | <b>907.9877</b>  | 17 |
| 12 | 1358.7791        | <b>679.8932</b>  | 1341.7525      | 671.3799         | 1340.7685      | 670.8879         | L    | <b>1719.8946</b> | 860.4509        | 1702.8680        | 851.9376         | <b>1701.8840</b> | 851.4456         | 16 |
| 13 | <b>1471.8631</b> | <b>736.4352</b>  | 1454.8366      | 727.9219         | 1453.8526      | 727.4299         | L    | <b>1606.8105</b> | 803.9089        | <b>1589.7840</b> | 795.3956         | <b>1588.7999</b> | 794.9036         | 15 |
| 14 | <b>1528.8846</b> | <b>764.9459</b>  | 1511.8580      | 756.4327         | 1510.8740      | 755.9406         | G    | <b>1493.7264</b> | 747.3669        | 1476.6999        | 738.8536         | <b>1475.7159</b> | 738.3616         | 14 |
| 15 | 1615.9166        | <b>808.4619</b>  | 1598.8901      | 799.9487         | 1597.9061      | 799.4567         | S    | <b>1436.7050</b> | 718.8561        | 1419.6784        | 710.3428         | 1418.6944        | 709.8508         | 13 |
| 16 | <b>1744.9592</b> | <b>872.9832</b>  | 1727.9327      | <b>864.4700</b>  | 1726.9486      | <b>863.9780</b>  | E    | 1349.6729        | 675.3401        | 1332.6464        | 666.8268         | 1331.6624        | 666.3348         | 12 |
| 17 | <b>1815.9963</b> | <b>908.5018</b>  | 1798.9698      | 899.9885         | 1797.9858      | 899.4965         | A    | <b>1220.6304</b> | 610.8188        | <b>1203.6038</b> | 602.3055         | 1202.6198        | 601.8135         | 11 |
| 18 | <b>1931.0233</b> | <b>966.0153</b>  | 1913.9967      | 957.5020         | 1913.0127      | 957.0100         | N    | <b>1149.5932</b> | 575.3003        | <b>1132.5667</b> | <b>566.7870</b>  | 1131.5827        | <b>566.2950</b>  | 10 |
| 19 | 2044.1073        | <b>1022.5573</b> | 2027.0808      | 1014.0440        | 2026.0968      | 1013.5520        | L    | 1034.5663        | 517.7868        | 1017.5397        | <b>509.2735</b>  | 1016.5557        | <b>508.7815</b>  | 9  |
| 20 | 2145.1550        | <b>1073.0811</b> | 2128.1285      | <b>1064.5679</b> | 2127.1444      | <b>1064.0759</b> | T    | <b>921.4822</b>  | 461.2448        | 904.4557         | 452.7315         | 903.4717         | 452.2395         | 8  |
| 21 | 2305.1857        | <b>1153.0965</b> | 2288.1591      | 1144.5832        | 2287.1751      | 1144.0912        | C    | <b>820.4346</b>  | 410.7209        | 803.4080         | 402.2076         | 802.4240         | 401.7156         | 7  |
| 22 | 2406.2333        | <b>1203.6203</b> | 2389.2068      | 1195.1070        | 2388.2228      | 1194.6150        | T    | <b>660.4039</b>  | 330.7056        | 643.3774         | 322.1923         | 642.3933         | 321.7003         | 6  |
| 23 | 2519.3174        | <b>1260.1623</b> | 2502.2909      | 1251.6491        | 2501.3068      | 1251.1571        | L    | <b>559.3562</b>  | 280.1817        | 542.3297         | 271.6685         | 541.3457         | 271.1765         | 5  |

|    |           |                  |           |                  |           |                  |          |                 |          |                 |          |                 |          |          |
|----|-----------|------------------|-----------|------------------|-----------|------------------|----------|-----------------|----------|-----------------|----------|-----------------|----------|----------|
| 24 | 2620.3651 | <b>1310.6862</b> | 2603.3385 | <b>1302.1729</b> | 2602.3545 | <b>1301.6809</b> | <b>T</b> | <b>446.2722</b> | 223.6397 | <b>429.2456</b> | 215.1264 | <b>428.2616</b> | 214.6344 | <b>4</b> |
| 25 | 2677.3865 | <b>1339.1969</b> | 2660.3600 | 1330.6836        | 2659.3760 | 1330.1916        | <b>G</b> | <b>345.2245</b> | 173.1159 | 328.1979        | 164.6026 |                 |          | <b>3</b> |
| 26 | 2790.4706 | <b>1395.7389</b> | 2773.4441 | 1387.2257        | 2772.4600 | 1386.7337        | <b>L</b> | 288.2030        | 144.6051 | 271.1765        | 136.0919 |                 |          | <b>2</b> |
| 27 |           |                  |           |                  |           |                  | <b>R</b> | 175.1190        | 88.0631  | 158.0924        | 79.5498  |                 |          | <b>1</b> |

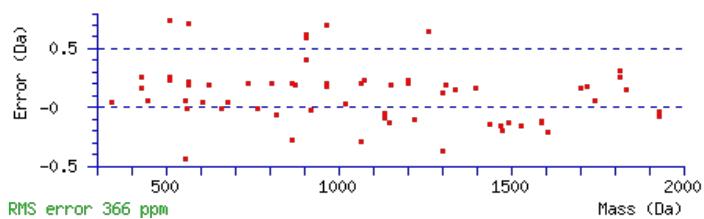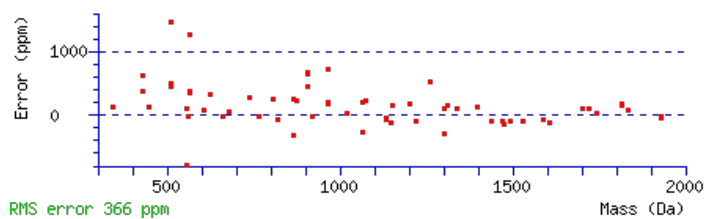

NCBI **BLAST** search of [LSLHRPALEDLLLGSEANLTCTLTGLR](#)  
 (Parameters: blastp, nr protein database, expect=20000, no filter, PAM30)  
 Other BLAST [web gateways](#)

All matches to this query

| Score | Mr(calc)  | Delta   | Sequence                                      |
|-------|-----------|---------|-----------------------------------------------|
| 140.4 | 2963.5750 | 0.0125  | <a href="#">LSLHRPALEDLLLGSEANLTCTLTGLR</a>   |
| 119.9 | 2962.5910 | 0.9966  | <a href="#">LSLHRPALEDLLLGSEANLTCTLTGLR</a>   |
| 12.8  | 2963.5790 | 0.0085  | <a href="#">ELREMIQLPGARPILDPVDFLGLQDK</a>    |
| 10.0  | 2962.5838 | 1.0038  | <a href="#">ENTLRGTNLIKVLDPVIFTQQAICAK</a>    |
| 9.7   | 2962.5838 | 1.0038  | <a href="#">ENTLRGTNLIKVLDPVIFTQQAICAK</a>    |
| 8.4   | 2962.5724 | 1.0152  | <a href="#">GLPPGTQIQIKVQAQGOEGLGAESLSVTR</a> |
| 7.8   | 2962.5905 | 0.9970  | <a href="#">GSAKSDLAAMGTVLSSIILPLVLMQLMR</a>  |
| 7.7   | 2963.5968 | -0.0093 | <a href="#">TQLHVNFPPLQTLNLSVGTGTVVSALVR</a>  |
| 7.7   | 2963.5968 | -0.0093 | <a href="#">TQLHVNFPPLQTLNLSVGTGTVVSALVR</a>  |
| 6.9   | 2962.5724 | 1.0152  | <a href="#">GLPPGTQIQIKVQAQGOEGLGAESLSVTR</a> |

Mascot: <http://www.matrixscience.com/>

# MASCOT SCIENCE Mascot Search Results

## Peptide View

MS/MS Fragmentation of **LAGKPTHVNVSVVMAEVDGTCY**

Found in **P01876** in **con\_Xuniprot\_HUMAN3**, IGHA1\_HUMAN Ig alpha-1 chain C region OS=Homo sapiens GN=IGHA1 PE=1 SV=2

Match to Query 16653: 2347.125822 from(783.382550,3+) intensity(12765.6963) rtinseconds(2201) scans(4813) index(21423)

Title: 111019\_Est\_ML\_YP\_G\_13Spectrum4222\_scans\_\_4813

Data file C:\mascot\20140703\_Tmgf\_1D\CSV\_UseAnalysis\MasterCSV\All\_Glyco\mgf\ptm\UC18ERLIC\_PTM\_35D.mgf

Click mouse within plot area to zoom in by factor of two about that point

Or, to Da

Label all possible matches Label matches used for scoring

Show Y-axis

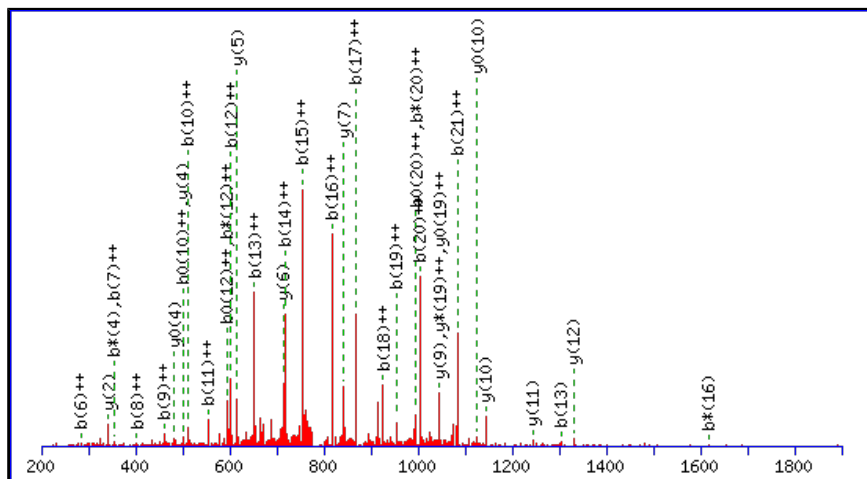

Monoisotopic mass of neutral peptide Mr(calc): 2347.1188

Fixed modifications: Carbamidomethyl (C) (apply to specified residues or termini only)

Variable modifications:

N9 : Deamidated (NQ)

Ions Score: 103 Expect: 1.3e-008

Matches : 37/206 fragment ions using 58 most intense peaks ([help](#))

| #  | b         | b <sup>++</sup> | b <sup>*</sup> | b <sup>*++</sup> | b <sup>0</sup> | b <sup>0++</sup> | Seq. | y         | y <sup>++</sup> | y <sup>*</sup> | y <sup>*++</sup> | y <sup>0</sup> | y <sup>0++</sup> | #  |
|----|-----------|-----------------|----------------|------------------|----------------|------------------|------|-----------|-----------------|----------------|------------------|----------------|------------------|----|
| 1  | 114.0913  | 57.5493         |                |                  |                |                  | L    |           |                 |                |                  |                |                  | 22 |
| 2  | 185.1285  | 93.0679         |                |                  |                |                  | A    | 2235.0420 | 1118.0247       | 2218.0155      | 1109.5114        | 2217.0315      | 1109.0194        | 21 |
| 3  | 242.1499  | 121.5786        |                |                  |                |                  | G    | 2164.0049 | 1082.5061       | 2146.9784      | 1073.9928        | 2145.9944      | 1073.5008        | 20 |
| 4  | 370.2449  | 185.6261        | 353.2183       | 177.1128         |                |                  | K    | 2106.9835 | 1053.9954       | 2089.9569      | 1045.4821        | 2088.9729      | 1044.9901        | 19 |
| 5  | 467.2976  | 234.1525        | 450.2711       | 225.6392         |                |                  | P    | 1978.8885 | 989.9479        | 1961.8619      | 981.4346         | 1960.8779      | 980.9426         | 18 |
| 6  | 568.3453  | 284.6763        | 551.3188       | 276.1630         | 550.3348       | 275.6710         | T    | 1881.8357 | 941.4215        | 1864.8092      | 932.9082         | 1863.8252      | 932.4162         | 17 |
| 7  | 705.4042  | 353.2058        | 688.3777       | 344.6925         | 687.3937       | 344.2005         | H    | 1780.7881 | 890.8977        | 1763.7615      | 882.3844         | 1762.7775      | 881.8924         | 16 |
| 8  | 804.4727  | 402.7400        | 787.4461       | 394.2267         | 786.4621       | 393.7347         | V    | 1643.7291 | 822.3682        | 1626.7026      | 813.8549         | 1625.7186      | 813.3629         | 15 |
| 9  | 919.4996  | 460.2534        | 902.4730       | 451.7402         | 901.4890       | 451.2482         | N    | 1544.6607 | 772.8340        | 1527.6342      | 764.3207         | 1526.6502      | 763.8287         | 14 |
| 10 | 1018.5680 | 509.7876        | 1001.5415      | 501.2744         | 1000.5574      | 500.7824         | V    | 1429.6338 | 715.3205        |                |                  | 1411.6232      | 706.3152         | 13 |
| 11 | 1105.6000 | 553.3037        | 1088.5735      | 544.7904         | 1087.5895      | 544.2984         | S    | 1330.5654 | 665.7863        |                |                  | 1312.5548      | 656.7810         | 12 |
| 12 | 1204.6684 | 602.8379        | 1187.6419      | 594.3246         | 1186.6579      | 593.8326         | V    | 1243.5333 | 622.2703        |                |                  | 1225.5228      | 613.2650         | 11 |
| 13 | 1303.7369 | 652.3721        | 1286.7103      | 643.8588         | 1285.7263      | 643.3668         | V    | 1144.4649 | 572.7361        |                |                  | 1126.4544      | 563.7308         | 10 |
| 14 | 1434.7773 | 717.8923        | 1417.7508      | 709.3790         | 1416.7668      | 708.8870         | M    | 1045.3965 | 523.2019        |                |                  | 1027.3859      | 514.1966         | 9  |
| 15 | 1505.8145 | 753.4109        | 1488.7879      | 744.8976         | 1487.8039      | 744.4056         | A    | 914.3560  | 457.6817        |                |                  | 896.3455       | 448.6764         | 8  |
| 16 | 1634.8571 | 817.9322        | 1617.8305      | 809.4189         | 1616.8465      | 808.9269         | E    | 843.3189  | 422.1631        |                |                  | 825.3083       | 413.1578         | 7  |
| 17 | 1733.9255 | 867.4664        | 1716.8989      | 858.9531         | 1715.9149      | 858.4611         | V    | 714.2763  | 357.6418        |                |                  | 696.2658       | 348.6365         | 6  |
| 18 | 1848.9524 | 924.9798        | 1831.9259      | 916.4666         | 1830.9418      | 915.9746         | D    | 615.2079  | 308.1076        |                |                  | 597.1973       | 299.1023         | 5  |
| 19 | 1905.9739 | 953.4906        | 1888.9473      | 944.9773         | 1887.9633      | 944.4853         | G    | 500.1810  | 250.5941        |                |                  | 482.1704       | 241.5888         | 4  |
| 20 | 2007.0216 | 1004.0144       | 1989.9950      | 995.5011         | 1989.0110      | 995.0091         | T    | 443.1595  | 222.0834        |                |                  | 425.1489       | 213.0781         | 3  |
| 21 | 2167.0522 | 1084.0297       | 2150.0257      | 1075.5165        | 2149.0416      | 1075.0245        | C    | 342.1118  | 171.5595        |                |                  |                |                  | 2  |
| 22 |           |                 |                |                  |                |                  | Y    | 182.0812  | 91.5442         |                |                  |                |                  | 1  |

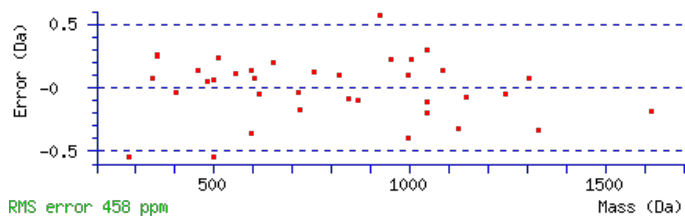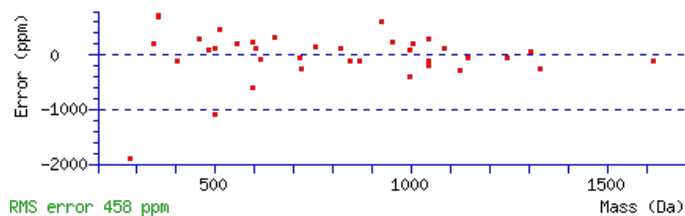

NCBI BLAST search of [LAGKPTHVNVSVVMAEVDGTCY](#)

(Parameters: blastp, nr protein database, expect=20000, no filter, PAM30)

Other BLAST [web gateways](#)

**All matches to this query**

| Score | Mr(calc)  | Delta  | Sequence                                 |
|-------|-----------|--------|------------------------------------------|
| 102.8 | 2347.1188 | 0.0070 | <a href="#">LAGKPTHVNVSVVMAEVDGTCY</a>   |
| 4.0   | 2347.1147 | 0.0111 | <a href="#">EEQEMNKCLRANQVLLQNK</a>      |
| 3.7   | 2346.1162 | 1.0097 | <a href="#">SPGQEDVKTTGPAGAMNTLAWSK</a>  |
| 3.7   | 2347.1147 | 0.0111 | <a href="#">EEQEMNKCLRANQVLLQNK</a>      |
| 3.0   | 2346.1162 | 1.0097 | <a href="#">SPGQEDVKTTGPAGAMNTLAWSK</a>  |
| 3.0   | 2345.1144 | 2.0114 | <a href="#">NLYRVGFEGMSDLKCVQDAK</a>     |
| 2.8   | 2346.1243 | 1.0016 | <a href="#">NSRIVSQKDDVHVCIMCLR</a>      |
| 2.7   | 2346.1243 | 1.0016 | <a href="#">NSRIVSQKDDVHVCIMCLR</a>      |
| 2.4   | 2347.1147 | 0.0111 | <a href="#">EEQEMNKCLRANQVLLQNK</a>      |
| 1.7   | 2347.1186 | 0.0072 | <a href="#">LMNRASGTQGA SEDNSGGGGKPK</a> |

Mascot: <http://www.matrixscience.com/>

# MASCOT SCIENCE Mascot Search Results

## Peptide View

MS/MS Fragmentation of **LAGKPTHVNVSVVMAEVDGTCY**

Found in **P01876** in **con\_Xuniprot\_HUMAN3**, IGHA1\_HUMAN Ig alpha-1 chain C region OS=Homo sapiens GN=IGHA1 PE=1 SV=2

Match to Query 18486: 2363.119872 from(788.713900,3+) intensity(225238.5313) rtinseconds(1335) scans(3128) index(8291)

Title: 111019\_Est\_ISCardio\_NMI\_YS\_G\_3Spectrum2649\_scans\_\_3128

Data file C:\mascot\20140703\_Tmgf\_1D\CSV\_UseAnalysis\MasterCSV\All\_Glyco\mgf\ptm\UC18ERLIC\_PTM\_35D.mgf

Click mouse within plot area to zoom in by factor of two about that point

Or, to Da

Label all possible matches Label matches used for scoring

Show Y-axis

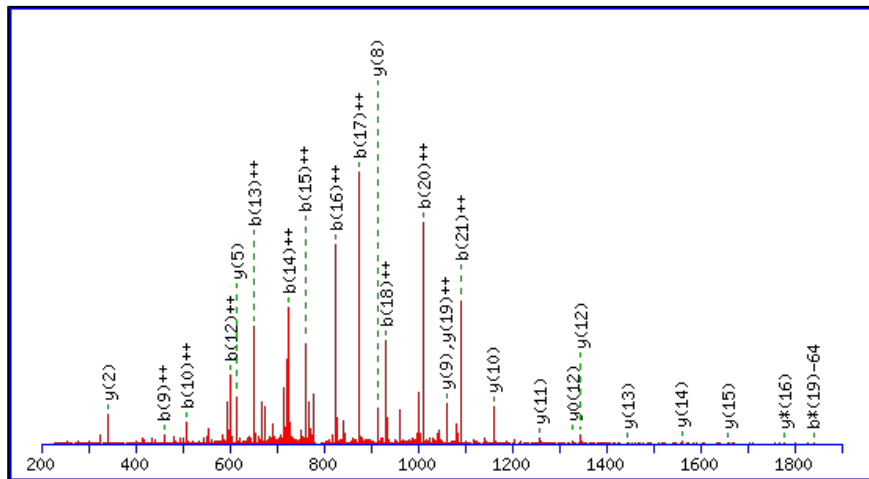

Monoisotopic mass of neutral peptide Mr(calc): 2363.1138

Fixed modifications: Carbamidomethyl (C) (apply to specified residues or termini only)

Variable modifications:

N9 : Deamidated (NQ)

M14 : Oxidation (M), with neutral losses 0.0000(shown in table), 63.9983

Ions Score: 97 Expect: 4.8e-008

Matches : 25/322 fragment ions using 33 most intense peaks ([help](#))

| #  | b         | b <sup>++</sup>  | b <sup>*</sup> | b <sup>*++</sup> | b <sup>0</sup> | b <sup>0++</sup> | Seq. | y                | y <sup>++</sup>  | y <sup>*</sup>   | y <sup>*++</sup> | y <sup>0</sup>   | y <sup>0++</sup> | #  |
|----|-----------|------------------|----------------|------------------|----------------|------------------|------|------------------|------------------|------------------|------------------|------------------|------------------|----|
| 1  | 114.0913  | 57.5493          |                |                  |                |                  | L    |                  |                  |                  |                  |                  |                  | 22 |
| 2  | 185.1285  | 93.0679          |                |                  |                |                  | A    | 2251.0369        | 1126.0221        | 2234.0104        | 1117.5088        | 2233.0264        | 1117.0168        | 21 |
| 3  | 242.1499  | 121.5786         |                |                  |                |                  | G    | 2179.9998        | 1090.5036        | 2162.9733        | 1081.9903        | 2161.9893        | 1081.4983        | 20 |
| 4  | 370.2449  | 185.6261         | 353.2183       | 177.1128         |                |                  | K    | 2122.9784        | <b>1061.9928</b> | 2105.9518        | 1053.4795        | 2104.9678        | 1052.9875        | 19 |
| 5  | 467.2976  | 234.1525         | 450.2711       | 225.6392         |                |                  | P    | 1994.8834        | 997.9453         | 1977.8569        | 989.4321         | 1976.8728        | 988.9401         | 18 |
| 6  | 568.3453  | 284.6763         | 551.3188       | 276.1630         | 550.3348       | 275.6710         | T    | 1897.8306        | 949.4190         | 1880.8041        | 940.9057         | 1879.8201        | 940.4137         | 17 |
| 7  | 705.4042  | 353.2058         | 688.3777       | 344.6925         | 687.3937       | 344.2005         | H    | 1796.7830        | 898.8951         | <b>1779.7564</b> | 890.3818         | 1778.7724        | 889.8898         | 16 |
| 8  | 804.4727  | 402.7400         | 787.4461       | 394.2267         | 786.4621       | 393.7347         | V    | <b>1659.7241</b> | 830.3657         | 1642.6975        | 821.8524         | 1641.7135        | 821.3604         | 15 |
| 9  | 919.4996  | <b>460.2534</b>  | 902.4730       | 451.7402         | 901.4890       | 451.2482         | N    | <b>1560.6556</b> | 780.8315         | 1543.6291        | 772.3182         | 1542.6451        | 771.8262         | 14 |
| 10 | 1018.5680 | <b>509.7876</b>  | 1001.5415      | 501.2744         | 1000.5574      | 500.7824         | V    | <b>1445.6287</b> | 723.3180         |                  |                  | 1427.6181        | 714.3127         | 13 |
| 11 | 1105.6000 | 553.3037         | 1088.5735      | 544.7904         | 1087.5895      | 544.2984         | S    | <b>1346.5603</b> | 673.7838         |                  |                  | <b>1328.5497</b> | 664.7785         | 12 |
| 12 | 1204.6684 | <b>602.8379</b>  | 1187.6419      | 594.3246         | 1186.6579      | 593.8326         | V    | <b>1259.5283</b> | 630.2678         |                  |                  | 1241.5177        | 621.2625         | 11 |
| 13 | 1303.7369 | <b>652.3721</b>  | 1286.7103      | 643.8588         | 1285.7263      | 643.3668         | V    | <b>1160.4598</b> | 580.7336         |                  |                  | 1142.4493        | 571.7283         | 10 |
| 14 | 1450.7723 | <b>725.8898</b>  | 1433.7457      | 717.3765         | 1432.7617      | 716.8845         | M    | <b>1061.3914</b> | 531.1994         |                  |                  | 1043.3809        | 522.1941         | 9  |
| 15 | 1521.8094 | <b>761.4083</b>  | 1504.7828      | 752.8951         | 1503.7988      | 752.4030         | A    | <b>914.3560</b>  | 457.6817         |                  |                  | 896.3455         | 448.6764         | 8  |
| 16 | 1650.8520 | <b>825.9296</b>  | 1633.8254      | 817.4163         | 1632.8414      | 816.9243         | E    | 843.3189         | 422.1631         |                  |                  | 825.3083         | 413.1578         | 7  |
| 17 | 1749.9204 | <b>875.4638</b>  | 1732.8938      | 866.9506         | 1731.9098      | 866.4585         | V    | 714.2763         | 357.6418         |                  |                  | 696.2658         | 348.6365         | 6  |
| 18 | 1864.9473 | <b>932.9773</b>  | 1847.9208      | 924.4640         | 1846.9368      | 923.9720         | D    | <b>615.2079</b>  | 308.1076         |                  |                  | 597.1973         | 299.1023         | 5  |
| 19 | 1921.9688 | 961.4880         | 1904.9422      | 952.9748         | 1903.9582      | 952.4828         | G    | 500.1810         | 250.5941         |                  |                  | 482.1704         | 241.5888         | 4  |
| 20 | 2023.0165 | <b>1012.0119</b> | 2005.9899      | 1003.4986        | 2005.0059      | 1003.0066        | T    | 443.1595         | 222.0834         |                  |                  | 425.1489         | 213.0781         | 3  |
| 21 | 2183.0471 | <b>1092.0272</b> | 2166.0206      | 1083.5139        | 2165.0366      | 1083.0219        | C    | <b>342.1118</b>  | 171.5595         |                  |                  |                  |                  | 2  |
| 22 |           |                  |                |                  |                |                  | Y    | 182.0812         | 91.5442          |                  |                  |                  |                  | 1  |



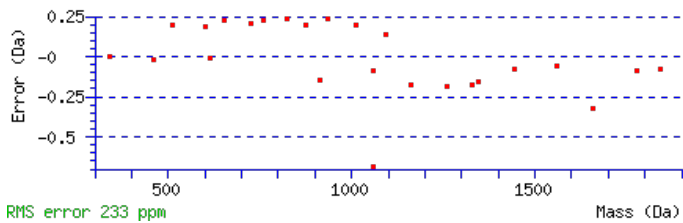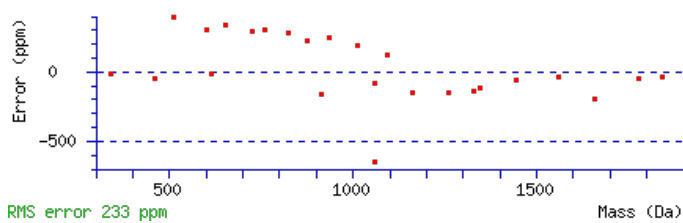

NCBI BLAST search of [LAGKPTHVNVSVVMAEVDGTCY](#)  
 (Parameters: blastp, nr protein database, expect=20000, no filter, PAM30)  
 Other BLAST [web gateways](#)

All matches to this query

| Score | Mr(calc)  | Delta   | Sequence                                  |
|-------|-----------|---------|-------------------------------------------|
| 96.8  | 2363.1138 | 0.0061  | <a href="#">LAGKPTHVNVSVVMAEVDGTCY</a>    |
| 7.7   | 2363.1236 | -0.0037 | <a href="#">NLITDICTEQCTLSDQLLPK</a>      |
| 7.7   | 2363.1236 | -0.0037 | <a href="#">NLITDICTEQCTLSDQLLPK</a>      |
| 7.7   | 2362.1111 | 1.0088  | <a href="#">SPGQEDVKTTPAGAMNTLAWSK</a>    |
| 6.0   | 2362.1230 | 0.9969  | <a href="#">ELIYNWGKENVVDDQFHEK</a>       |
| 6.0   | 2363.1144 | 0.0054  | <a href="#">HMGGAKVMATTGGTNLRDDIMR</a>    |
| 4.1   | 2363.1313 | -0.0114 | <a href="#">SKPTSLSQSSSTGNANGSDAPSKSR</a> |
| 3.9   | 2363.1314 | -0.0116 | <a href="#">SMQQEELTILNIYAPNTGAPR</a>     |
| 3.9   | 2363.1314 | -0.0116 | <a href="#">SMQQEELTILNIYAPNTGAPR</a>     |
| 3.9   | 2363.1314 | -0.0116 | <a href="#">SMQQEELTILNIYAPNTGAPR</a>     |

Mascot: <http://www.matrixscience.com/>

# MASCOT SCIENCE Mascot Search Results

## Peptide View

MS/MS Fragmentation of **TIDRLAGKPTHVNVSVVMAEVDGTCY**

Found in **P01876** in **con\_Xuniprot\_HUMAN3**, IGHA1\_HUMAN Ig alpha-1 chain C region OS=Homo sapiens GN=IGHA1 PE=1 SV=2

Match to Query 25769: 2848.387632 from(950.469820,3+) intensity(48384.0938) rtinseconds(1472) scans(3547) index(23207)

Title: 111019\_Est\_MI\_YS\_G\_04Spectrum3032\_scans\_\_3547

Data file C:\mascot\20140703\_Tmgf\_1D\CSV\_UseAnalysis\MasterCSV\All\_Glyco\mgf\ptm\UC18ERLIC\_PTM\_35D.mgf

Click mouse within plot area to zoom in by factor of two about that point

Or, to Da

Label all possible matches Label matches used for scoring

Show Y-axis

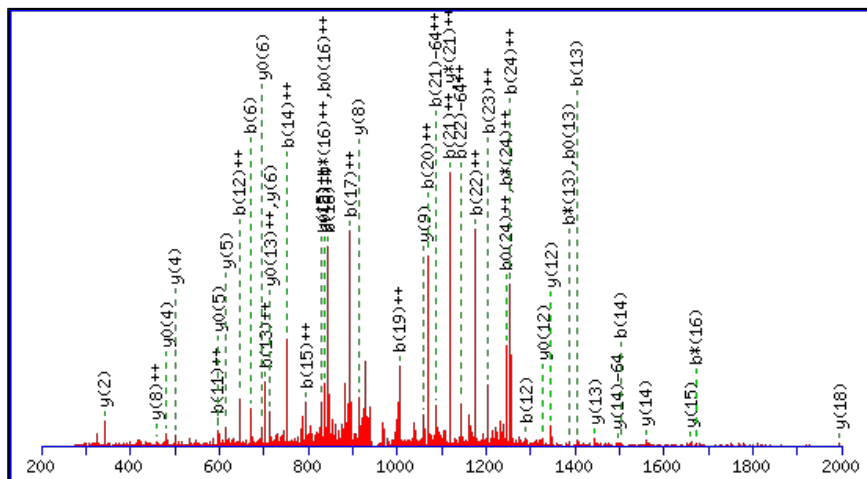

Monoisotopic mass of neutral peptide Mr(calc): 2848.3735

Fixed modifications: Carbamidomethyl (C) (apply to specified residues or termini only)

Variable modifications:

N13 : Deamidated (NQ)

M18 : Oxidation (M), with neutral losses 0.0000(shown in table), 63.9983

Ions Score: 59 Expect: 0.00034

Matches : 47/404 fragment ions using 84 most intense peaks ([help](#))

| #  | b                | b <sup>++</sup>  | b <sup>*</sup>   | b <sup>*++</sup> | b <sup>0</sup>   | b <sup>0++</sup> | Seq. | y                | y <sup>++</sup> | y <sup>*</sup> | y <sup>*++</sup> | y <sup>0</sup>   | y <sup>0++</sup> | #  |
|----|------------------|------------------|------------------|------------------|------------------|------------------|------|------------------|-----------------|----------------|------------------|------------------|------------------|----|
| 1  | 102.0550         | 51.5311          |                  |                  | 84.0444          | 42.5258          | T    |                  |                 |                |                  |                  |                  | 26 |
| 2  | 215.1390         | 108.0731         |                  |                  | 197.1285         | 99.0679          | I    | 2748.3331        | 1374.6702       | 2731.3066      | 1366.1569        | 2730.3226        | 1365.6649        | 25 |
| 3  | 330.1660         | 165.5866         |                  |                  | 312.1554         | 156.5813         | D    | 2635.2491        | 1318.1282       | 2618.2225      | 1309.6149        | 2617.2385        | 1309.1229        | 24 |
| 4  | 486.2671         | 243.6372         | 469.2405         | 235.1239         | 468.2565         | 234.6319         | R    | 2520.2221        | 1260.6147       | 2503.1956      | 1252.1014        | 2502.2116        | 1251.6094        | 23 |
| 5  | 599.3511         | 300.1792         | 582.3246         | 291.6659         | 581.3406         | 291.1739         | L    | 2364.1210        | 1182.5641       | 2347.0945      | 1174.0509        | 2346.1104        | 1173.5589        | 22 |
| 6  | <b>670.3883</b>  | 335.6978         | 653.3617         | 327.1845         | 652.3777         | 326.6925         | A    | 2251.0369        | 1126.0221       | 2234.0104      | <b>1117.5088</b> | 2233.0264        | 1117.0168        | 21 |
| 7  | 727.4097         | 364.2085         | 710.3832         | 355.6952         | 709.3991         | 355.2032         | G    | 2179.9998        | 1090.5036       | 2162.9733      | 1081.9903        | 2161.9893        | 1081.4983        | 20 |
| 8  | 855.5047         | 428.2560         | 838.4781         | 419.7427         | <b>837.4941</b>  | 419.2507         | K    | 2122.9784        | 1061.9928       | 2105.9518      | 1053.4795        | 2104.9678        | 1052.9875        | 19 |
| 9  | 952.5574         | 476.7824         | 935.5309         | 468.2691         | 934.5469         | 467.7771         | P    | <b>1994.8834</b> | 997.9453        | 1977.8569      | 989.4321         | 1976.8728        | 988.9401         | 18 |
| 10 | 1053.6051        | 527.3062         | 1036.5786        | 518.7929         | 1035.5946        | 518.3009         | T    | 1897.8306        | 949.4190        | 1880.8041      | 940.9057         | 1879.8201        | 940.4137         | 17 |
| 11 | 1190.6640        | <b>595.8357</b>  | 1173.6375        | 587.3224         | 1172.6535        | 586.8304         | H    | 1796.7830        | 898.8951        | 1779.7564      | 890.3818         | 1778.7724        | 889.8898         | 16 |
| 12 | <b>1289.7324</b> | <b>645.3699</b>  | 1272.7059        | 636.8566         | 1271.7219        | 636.3646         | V    | <b>1659.7241</b> | <b>830.3657</b> | 1642.6975      | 821.8524         | 1641.7135        | 821.3604         | 15 |
| 13 | <b>1404.7594</b> | <b>702.8833</b>  | <b>1387.7328</b> | 694.3701         | <b>1386.7488</b> | 693.8781         | N    | <b>1560.6556</b> | 780.8315        | 1543.6291      | 772.3182         | 1542.6451        | 771.8262         | 14 |
| 14 | <b>1503.8278</b> | <b>752.4175</b>  | 1486.8013        | 743.9043         | 1485.8172        | 743.4123         | V    | <b>1445.6287</b> | 723.3180        |                |                  | 1427.6181        | <b>714.3127</b>  | 13 |
| 15 | 1590.8598        | <b>795.9336</b>  | 1573.8333        | 787.4203         | 1572.8493        | 786.9283         | S    | <b>1346.5603</b> | 673.7838        |                |                  | <b>1328.5497</b> | 664.7785         | 12 |
| 16 | 1689.9282        | <b>845.4678</b>  | <b>1672.9017</b> | <b>836.9545</b>  | 1671.9177        | <b>836.4625</b>  | V    | 1259.5283        | 630.2678        |                |                  | 1241.5177        | 621.2625         | 11 |
| 17 | 1788.9967        | <b>895.0020</b>  | 1771.9701        | 886.4887         | 1770.9861        | 885.9967         | V    | 1160.4598        | 580.7336        |                |                  | 1142.4493        | 571.7283         | 10 |
| 18 | 1936.0321        | 968.5197         | 1919.0055        | 960.0064         | 1918.0215        | 959.5144         | M    | <b>1061.3914</b> | 531.1994        |                |                  | 1043.3809        | 522.1941         | 9  |
| 19 | 2007.0692        | <b>1004.0382</b> | 1990.0426        | 995.5250         | 1989.0586        | 995.0329         | A    | <b>914.3560</b>  | <b>457.6817</b> |                |                  | 896.3455         | 448.6764         | 8  |
| 20 | 2136.1118        | <b>1068.5595</b> | 2119.0852        | 1060.0462        | 2118.1012        | 1059.5542        | E    | 843.3189         | 422.1631        |                |                  | 825.3083         | 413.1578         | 7  |
| 21 | 2235.1802        | <b>1118.0937</b> | 2218.1536        | 1109.5805        | 2217.1696        | 1109.0884        | V    | <b>714.2763</b>  | 357.6418        |                |                  | <b>696.2658</b>  | 348.6365         | 6  |
| 22 | 2350.2071        | <b>1175.6072</b> | 2333.1806        | 1167.0939        | 2332.1966        | 1166.6019        | D    | <b>615.2079</b>  | 308.1076        |                |                  | <b>597.1973</b>  | 299.1023         | 5  |

|    |           |                  |           |                  |           |                  |   |                 |          |  |  |                 |          |   |
|----|-----------|------------------|-----------|------------------|-----------|------------------|---|-----------------|----------|--|--|-----------------|----------|---|
| 23 | 2407.2286 | <b>1204.1179</b> | 2390.2020 | 1195.6047        | 2389.2180 | 1195.1126        | G | <b>500.1810</b> | 250.5941 |  |  | <b>482.1704</b> | 241.5888 | 4 |
| 24 | 2508.2763 | <b>1254.6418</b> | 2491.2497 | <b>1246.1285</b> | 2490.2657 | <b>1245.6365</b> | T | 443.1595        | 222.0834 |  |  | 425.1489        | 213.0781 | 3 |
| 25 | 2668.3069 | 1334.6571        | 2651.2804 | 1326.1438        | 2650.2964 | 1325.6518        | C | <b>342.1118</b> | 171.5595 |  |  |                 |          | 2 |
| 26 |           |                  |           |                  |           |                  | Y | 182.0812        | 91.5442  |  |  |                 |          | 1 |

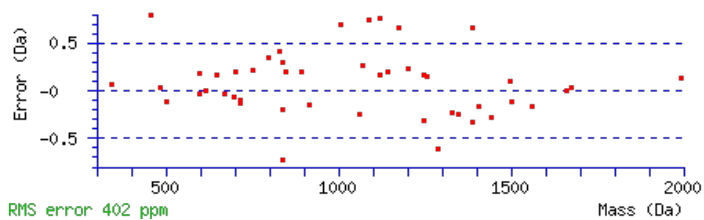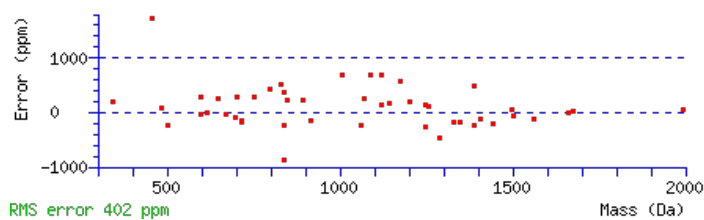

NCBI BLAST search of [TIDRLAGKPTHVNVSVVMAEVDGTCY](#)

(Parameters: blastp, nr protein database, expect=20000, no filter, PAM30)

Other BLAST [web gateways](#)

All matches to this query

| Score | Mr(calc)  | Delta  | Sequence                                     |
|-------|-----------|--------|----------------------------------------------|
| 59.1  | 2848.3735 | 0.0141 | <a href="#">TIDRLAGKPTHVNVSVVMAEVDGTCY</a>   |
| 33.2  | 2847.3895 | 0.9981 | <a href="#">TIDRLAGKPTHVNVSVVMAEVDGTCY</a>   |
| 7.4   | 2846.3790 | 2.0087 | <a href="#">SQPQGLVSLMGSPVAESAEMAEARIK</a>   |
| 7.1   | 2848.3839 | 0.0038 | <a href="#">QDQQDPKSSSATASQPPELPPGLQK</a>    |
| 4.7   | 2846.3949 | 1.9927 | <a href="#">KSPMHDTTKFIGQAIVEPALYSPYH</a>    |
| 3.8   | 2847.3742 | 1.0134 | <a href="#">DPSARSNTEMALTL SAVQPCINSEIK</a>  |
| 3.1   | 2846.3922 | 1.9954 | <a href="#">ASCPSRPAGPGPGPFESHIOLEFVGAPR</a> |
| 2.3   | 2847.3789 | 1.0087 | <a href="#">LKDVQSMDELKDVYNHFLLYYGR</a>      |
| 2.3   | 2848.3852 | 0.0024 | <a href="#">TYSDELGHVGSYLOGQRRITHSR</a>      |
| 2.3   | 2848.3852 | 0.0024 | <a href="#">TYSDELGHVGSYLOGQRRITHSR</a>      |

Mascot: <http://www.matrixscience.com/>

# MATRIX SCIENCE Mascot Search Results

## Peptide View

MS/MS Fragmentation of **LSLHRPALEDLLLGSEANLTCTLTGLRDASGVTFWTTPSSGK**

Found in **P01876** in **con\_Xuniprot\_HUMAN3**, IGHA1\_HUMAN Ig alpha-1 chain C region OS=Homo sapiens GN=IGHA1 PE=1 SV=2

Match to Query 28986: 4485.304170 from(898.068110,5+) intensity(27659.8945) rtinseconds(2866) scans(7493) index(22377)

Title: 111019\_Est\_MI\_YS\_G\_02Spectrum6519\_scans\_\_7493

Data file C:\mascot\20140703\_Tmgf\_1D\CSV\_UseAnalysis\MasterCSV\All\_Glyco\mgf\ptm\UC18ERLIC\_PTM\_35D.mgf

Click mouse within plot area to zoom in by factor of two about that point

Or, to Da

Label all possible matches Label matches used for scoring

Show Y-axis

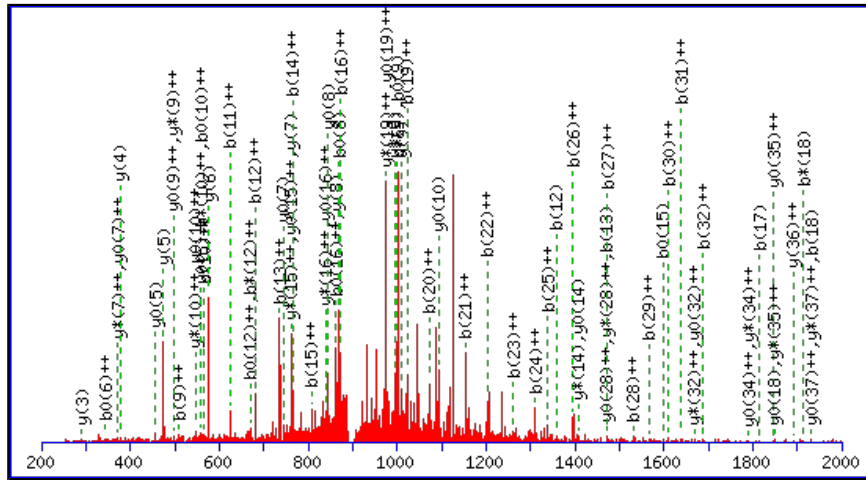

Monoisotopic mass of neutral peptide Mr(calc): 4485.2850

Fixed modifications: Carbamidomethyl (C) (apply to specified residues or termini only)

Variable modifications:

N18 : Deamidated (NQ)

Ions Score: 58 Expect: 0.00017

Matches : 76/478 fragment ions using 160 most intense peaks ([help](#))

| #  | b         | b <sup>++</sup> | b <sup>*</sup> | b <sup>*++</sup> | b <sup>0</sup> | b <sup>0++</sup> | Seq. | y         | y <sup>++</sup> | y <sup>*</sup> | y <sup>*++</sup> | y <sup>0</sup> | y <sup>0++</sup> | #  |
|----|-----------|-----------------|----------------|------------------|----------------|------------------|------|-----------|-----------------|----------------|------------------|----------------|------------------|----|
| 1  | 114.0913  | 57.5493         |                |                  |                |                  | L    |           |                 |                |                  |                |                  | 42 |
| 2  | 201.1234  | 101.0653        |                |                  | 183.1128       | 92.0600          | S    | 4373.2082 | 2187.1077       | 4356.1816      | 2178.5945        | 4355.1976      | 2178.1025        | 41 |
| 3  | 314.2074  | 157.6074        |                |                  | 296.1969       | 148.6021         | L    | 4286.1762 | 2143.5917       | 4269.1496      | 2135.0784        | 4268.1656      | 2134.5864        | 40 |
| 4  | 451.2663  | 226.1368        |                |                  | 433.2558       | 217.1315         | H    | 4173.0921 | 2087.0497       | 4156.0656      | 2078.5364        | 4155.0815      | 2078.0444        | 39 |
| 5  | 607.3675  | 304.1874        | 590.3409       | 295.6741         | 589.3569       | 295.1821         | R    | 4036.0332 | 2018.5202       | 4019.0066      | 2010.0070        | 4018.0226      | 2009.5150        | 38 |
| 6  | 704.4202  | 352.7137        | 687.3937       | 344.2005         | 686.4097       | 343.7085         | P    | 3879.9321 | 1940.4697       | 3862.9055      | 1931.9564        | 3861.9215      | 1931.4644        | 37 |
| 7  | 775.4573  | 388.2323        | 758.4308       | 379.7190         | 757.4468       | 379.2270         | A    | 3782.8793 | 1891.9433       | 3765.8528      | 1883.4300        | 3764.8688      | 1882.9380        | 36 |
| 8  | 888.5414  | 444.7743        | 871.5148       | 436.2611         | 870.5308       | 435.7691         | L    | 3711.8422 | 1856.4247       | 3694.8157      | 1847.9115        | 3693.8316      | 1847.4195        | 35 |
| 9  | 1017.5840 | 509.2956        | 1000.5574      | 500.7824         | 999.5734       | 500.2904         | E    | 3598.7581 | 1799.8827       | 3581.7316      | 1791.3694        | 3580.7476      | 1790.8774        | 34 |
| 10 | 1132.6109 | 566.8091        | 1115.5844      | 558.2958         | 1114.6004      | 557.8038         | D    | 3469.7155 | 1735.3614       | 3452.6890      | 1726.8481        | 3451.7050      | 1726.3561        | 33 |
| 11 | 1245.6950 | 623.3511        | 1228.6684      | 614.8379         | 1227.6844      | 614.3459         | L    | 3354.6886 | 1677.8479       | 3337.6621      | 1669.3347        | 3336.6780      | 1668.8427        | 32 |
| 12 | 1358.7791 | 679.8932        | 1341.7525      | 671.3799         | 1340.7685      | 670.8879         | L    | 3241.6045 | 1621.3059       | 3224.5780      | 1612.7926        | 3223.5940      | 1612.3006        | 31 |
| 13 | 1471.8631 | 736.4352        | 1454.8366      | 727.9219         | 1453.8526      | 727.4299         | L    | 3128.5205 | 1564.7639       | 3111.4939      | 1556.2506        | 3110.5099      | 1555.7586        | 30 |
| 14 | 1528.8846 | 764.9459        | 1511.8580      | 756.4327         | 1510.8740      | 755.9406         | G    | 3015.4364 | 1508.2218       | 2998.4099      | 1499.7086        | 2997.4258      | 1499.2166        | 29 |
| 15 | 1615.9166 | 808.4619        | 1598.8901      | 799.9487         | 1597.9061      | 799.4567         | S    | 2958.4149 | 1479.7111       | 2941.3884      | 1471.1978        | 2940.4044      | 1470.7058        | 28 |
| 16 | 1744.9592 | 872.9832        | 1727.9327      | 864.4700         | 1726.9486      | 863.9780         | E    | 2871.3829 | 1436.1951       | 2854.3564      | 1427.6818        | 2853.3724      | 1427.1898        | 27 |
| 17 | 1815.9963 | 908.5018        | 1798.9698      | 899.9885         | 1797.9858      | 899.4965         | A    | 2742.3403 | 1371.6738       | 2725.3138      | 1363.1605        | 2724.3298      | 1362.6685        | 26 |
| 18 | 1931.0233 | 966.0153        | 1913.9967      | 957.5020         | 1913.0127      | 957.0100         | N    | 2671.3032 | 1336.1552       | 2654.2767      | 1327.6420        | 2653.2926      | 1327.1500        | 25 |
| 19 | 2044.1073 | 1022.5573       | 2027.0808      | 1014.0440        | 2026.0968      | 1013.5520        | L    | 2556.2763 | 1278.6418       | 2539.2497      | 1270.1285        | 2538.2657      | 1269.6365        | 24 |
| 20 | 2145.1550 | 1073.0811       | 2128.1285      | 1064.5679        | 2127.1444      | 1064.0759        | T    | 2443.1922 | 1222.0997       | 2426.1657      | 1213.5865        | 2425.1816      | 1213.0945        | 23 |
| 21 | 2305.1857 | 1153.0965       | 2288.1591      | 1144.5832        | 2287.1751      | 1144.0912        | C    | 2342.1445 | 1171.5759       | 2325.1180      | 1163.0626        | 2324.1340      | 1162.5706        | 22 |
| 22 | 2406.2333 | 1203.6203       | 2389.2068      | 1195.1070        | 2388.2228      | 1194.6150        | T    | 2182.1139 | 1091.5606       | 2165.0873      | 1083.0473        | 2164.1033      | 1082.5553        | 21 |
| 23 | 2519.3174 | 1260.1623       | 2502.2909      | 1251.6491        | 2501.3068      | 1251.1571        | L    | 2081.0662 | 1041.0367       | 2064.0396      | 1032.5235        | 2063.0556      | 1032.0315        | 20 |

|    |           |                  |           |           |           |           |   |                  |          |                  |                 |                  |                 |    |
|----|-----------|------------------|-----------|-----------|-----------|-----------|---|------------------|----------|------------------|-----------------|------------------|-----------------|----|
| 24 | 2620.3651 | <b>1310.6862</b> | 2603.3385 | 1302.1729 | 2602.3545 | 1301.6809 | T | 1967.9821        | 984.4947 | 1950.9556        | <b>975.9814</b> | 1949.9716        | <b>975.4894</b> | 19 |
| 25 | 2677.3865 | <b>1339.1969</b> | 2660.3600 | 1330.6836 | 2659.3760 | 1330.1916 | G | 1866.9345        | 933.9709 | 1849.9079        | 925.4576        | <b>1848.9239</b> | 924.9656        | 18 |
| 26 | 2790.4706 | <b>1395.7389</b> | 2773.4441 | 1387.2257 | 2772.4600 | 1386.7337 | L | 1809.9130        | 905.4601 | 1792.8864        | 896.9469        | 1791.9024        | 896.4549        | 17 |
| 27 | 2946.5717 | <b>1473.7895</b> | 2929.5452 | 1465.2762 | 2928.5612 | 1464.7842 | R | 1696.8289        | 848.9181 | 1679.8024        | <b>840.4048</b> | 1678.8184        | <b>839.9128</b> | 16 |
| 28 | 3061.5987 | <b>1531.3030</b> | 3044.5721 | 1522.7897 | 3043.5881 | 1522.2977 | D | 1540.7278        | 770.8675 | 1523.7013        | <b>762.3543</b> | 1522.7172        | <b>761.8623</b> | 15 |
| 29 | 3132.6358 | <b>1566.8215</b> | 3115.6092 | 1558.3083 | 3114.6252 | 1557.8162 | A | 1425.7009        | 713.3541 | <b>1408.6743</b> | 704.8408        | <b>1407.6903</b> | 704.3488        | 14 |
| 30 | 3219.6678 | <b>1610.3375</b> | 3202.6413 | 1601.8243 | 3201.6572 | 1601.3323 | S | 1354.6638        | 677.8355 | 1337.6372        | 669.3222        | 1336.6532        | 668.8302        | 13 |
| 31 | 3276.6893 | <b>1638.8483</b> | 3259.6627 | 1630.3350 | 3258.6787 | 1629.8430 | G | 1267.6317        | 634.3195 | 1250.6052        | 625.8062        | 1249.6212        | 625.3142        | 12 |
| 32 | 3375.7577 | <b>1688.3825</b> | 3358.7311 | 1679.8692 | 3357.7471 | 1679.3772 | V | 1210.6103        | 605.8088 | 1193.5837        | 597.2955        | 1192.5997        | 596.8035        | 11 |
| 33 | 3476.8054 | 1738.9063        | 3459.7788 | 1730.3930 | 3458.7948 | 1729.9010 | T | 1111.5419        | 556.2746 | 1094.5153        | <b>547.7613</b> | <b>1093.5313</b> | <b>547.2693</b> | 10 |
| 34 | 3623.8738 | 1812.4405        | 3606.8472 | 1803.9273 | 3605.8632 | 1803.4352 | F | <b>1010.4942</b> | 505.7507 | <b>993.4676</b>  | <b>497.2374</b> | 992.4836         | <b>496.7454</b> | 9  |
| 35 | 3724.9215 | 1862.9644        | 3707.8949 | 1854.4511 | 3706.9109 | 1853.9591 | T | <b>863.4258</b>  | 432.2165 | 846.3992         | 423.7032        | <b>845.4152</b>  | 423.2112        | 8  |
| 36 | 3911.0008 | 1956.0040        | 3893.9742 | 1947.4907 | 3892.9902 | 1946.9987 | W | <b>762.3781</b>  | 381.6927 | 745.3515         | <b>373.1794</b> | <b>744.3675</b>  | <b>372.6874</b> | 7  |
| 37 | 4012.0484 | 2006.5279        | 3995.0219 | 1998.0146 | 3994.0379 | 1997.5226 | T | <b>576.2988</b>  | 288.6530 | 559.2722         | 280.1397        | <b>558.2882</b>  | 279.6477        | 6  |
| 38 | 4109.1012 | 2055.0542        | 4092.0747 | 2046.5410 | 4091.0906 | 2046.0490 | P | <b>475.2511</b>  | 238.1292 | 458.2245         | 229.6159        | <b>457.2405</b>  | 229.1239        | 5  |
| 39 | 4196.1332 | 2098.5703        | 4179.1067 | 2090.0570 | 4178.1227 | 2089.5650 | S | <b>378.1983</b>  | 189.6028 | 361.1718         | 181.0895        | 360.1878         | 180.5975        | 4  |
| 40 | 4283.1653 | 2142.0863        | 4266.1387 | 2133.5730 | 4265.1547 | 2133.0810 | S | <b>291.1663</b>  | 146.0868 | 274.1397         | 137.5735        | 273.1557         | 137.0815        | 3  |
| 41 | 4340.1867 | 2170.5970        | 4323.1602 | 2162.0837 | 4322.1762 | 2161.5917 | G | 204.1343         | 102.5708 | 187.1077         | 94.0575         |                  |                 | 2  |
| 42 |           |                  |           |           |           |           | K | 147.1128         | 74.0600  | 130.0863         | 65.5468         |                  |                 | 1  |

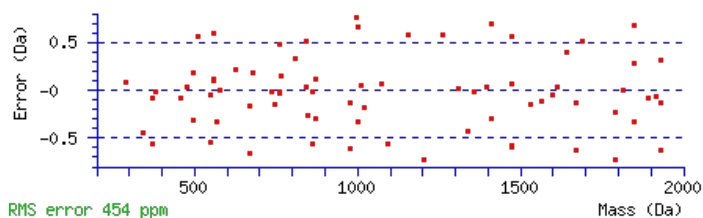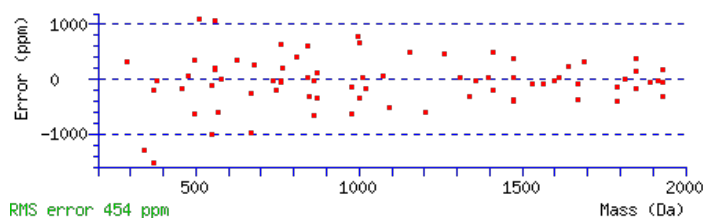

NCBI BLAST search of [LSLHRPALEDLLGSEANLTCTLTGLRDASGVTFTWTPSSGK](#)

(Parameters: blastp, nr protein database, expect=20000, no filter, PAM30)

Other BLAST [web gateways](#)

All matches to this query

| Score | Mr(calc)  | Delta  | Sequence                                                    |
|-------|-----------|--------|-------------------------------------------------------------|
| 58.5  | 4485.2850 | 0.0192 | <a href="#">LSLHRPALEDLLGSEANLTCTLTGLRDASGVTFTWTPSSGK</a>   |
| 44.5  | 4484.3010 | 1.0032 | <a href="#">LSLHRPALEDLLGSEANLTCTLTGLRDASGVTFTWTPSSGK</a>   |
| 7.0   | 4483.2953 | 2.0089 | <a href="#">ALALVRNPINSPVQSTPVVPVFKPCNAMQEQVKLCSSYI</a>     |
| 6.9   | 4484.2793 | 1.0248 | <a href="#">ALALVRNPINSPVQSTPVVPVFKPCNAMQEQVKLCSSYI</a>     |
| 6.5   | 4484.3095 | 0.9947 | <a href="#">GANVNRTTANNNDHTVLSLACAGGHLAVVELLLAHGADPTRLK</a> |
| 6.5   | 4484.3095 | 0.9947 | <a href="#">GANVNRTTANNNDHTVLSLACAGGHLAVVELLLAHGADPTRLK</a> |
| 5.6   | 4484.3095 | 0.9947 | <a href="#">GANVNRTTANNNDHTVLSLACAGGHLAVVELLLAHGADPTRLK</a> |
| 5.2   | 4484.3095 | 0.9947 | <a href="#">GANVNRTTANNNDHTVLSLACAGGHLAVVELLLAHGADPTRLK</a> |
| 5.1   | 4483.2780 | 2.0261 | <a href="#">VPMLTWSTCAFTIQAIENLLGDEGKPLFGALQNRQHNGLK</a>    |
| 4.7   | 4485.2910 | 0.0132 | <a href="#">TEKKPPPPPTAIEEEEDMSGLDVGLLVSLTTMIRPDQK</a>      |

Mascot: <http://www.matrixscience.com/>

# MASCOT SCIENCE Mascot Search Results

## Peptide View

MS/MS Fragmentation of **TIDRLAGKPTHVNVSVVMAEVDGTCY**

Found in **P01876** in **con\_Xuniprot\_HUMAN3**, IGHA1\_HUMAN Ig alpha-1 chain C region OS=Homo sapiens GN=IGHA1 PE=1 SV=2

Match to Query 25751: 2832.387102 from(945.136310,3+) intensity(46664.5313) rtinseconds(1787) scans(4427) index(23282)

Title: 111019\_Est\_ML\_YS\_G\_04Spectrum3811\_scans\_\_4427

Data file C:\mascot\20140703\_Tmgf\_1D\CSV\_UseAnalysis\MasterCSV\All\_Glyco\mgf\ptm\UC18ERLIC\_PTM\_35D.mgf

Click mouse within plot area to zoom in by factor of two about that point

Or, to Da

Label all possible matches Label matches used for scoring

Show Y-axis

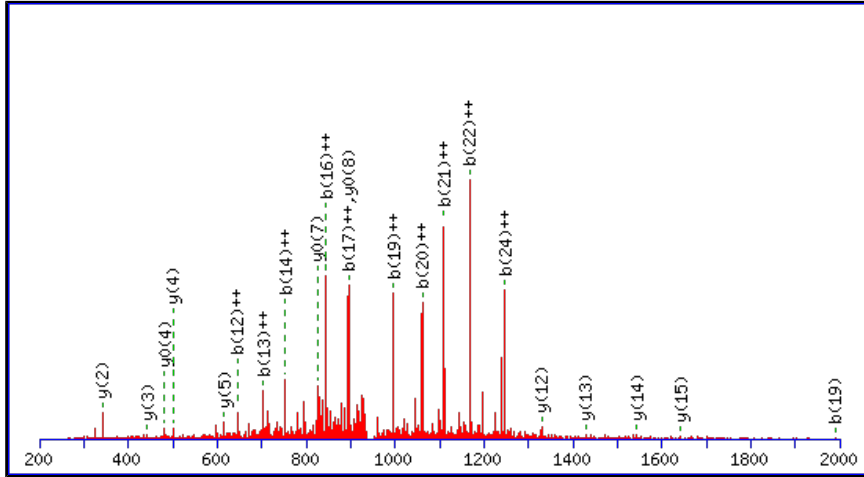

Monoisotopic mass of neutral peptide Mr(calc): 2832.3786

Fixed modifications: Carbamidomethyl (C) (apply to specified residues or termini only)

Variable modifications:

N13 : Deamidated (NQ)

Ions Score: 58 Expect: 0.00047

Matches : 22/264 fragment ions using 35 most intense peaks ([help](#))

| #  | b                | b <sup>++</sup>  | b*        | b <sup>*++</sup> | b <sup>0</sup> | b <sup>0++</sup> | Seq. | y                | y <sup>++</sup> | y*        | y <sup>*++</sup> | y <sup>0</sup>  | y <sup>0++</sup> | #  |
|----|------------------|------------------|-----------|------------------|----------------|------------------|------|------------------|-----------------|-----------|------------------|-----------------|------------------|----|
| 1  | 102.0550         | 51.5311          |           |                  | 84.0444        | 42.5258          | T    |                  |                 |           |                  |                 |                  | 26 |
| 2  | 215.1390         | 108.0731         |           |                  | 197.1285       | 99.0679          | I    | 2732.3382        | 1366.6727       | 2715.3117 | 1358.1595        | 2714.3277       | 1357.6675        | 25 |
| 3  | 330.1660         | 165.5866         |           |                  | 312.1554       | 156.5813         | D    | 2619.2542        | 1310.1307       | 2602.2276 | 1301.6174        | 2601.2436       | 1301.1254        | 24 |
| 4  | 486.2671         | 243.6372         | 469.2405  | 235.1239         | 468.2565       | 234.6319         | R    | 2504.2272        | 1252.6172       | 2487.2007 | 1244.1040        | 2486.2166       | 1243.6120        | 23 |
| 5  | 599.3511         | 300.1792         | 582.3246  | 291.6659         | 581.3406       | 291.1739         | L    | 2348.1261        | 1174.5667       | 2331.0995 | 1166.0534        | 2330.1155       | 1165.5614        | 22 |
| 6  | 670.3883         | 335.6978         | 653.3617  | 327.1845         | 652.3777       | 326.6925         | A    | 2235.0420        | 1118.0247       | 2218.0155 | 1109.5114        | 2217.0315       | 1109.0194        | 21 |
| 7  | 727.4097         | 364.2085         | 710.3832  | 355.6952         | 709.3991       | 355.2032         | G    | 2164.0049        | 1082.5061       | 2146.9784 | 1073.9928        | 2145.9944       | 1073.5008        | 20 |
| 8  | 855.5047         | 428.2560         | 838.4781  | 419.7427         | 837.4941       | 419.2507         | K    | 2106.9835        | 1053.9954       | 2089.9569 | 1045.4821        | 2088.9729       | 1044.9901        | 19 |
| 9  | 952.5574         | 476.7824         | 935.5309  | 468.2691         | 934.5469       | 467.7771         | P    | 1978.8885        | 989.9479        | 1961.8619 | 981.4346         | 1960.8779       | 980.9426         | 18 |
| 10 | 1053.6051        | 527.3062         | 1036.5786 | 518.7929         | 1035.5946      | 518.3009         | T    | 1881.8357        | 941.4215        | 1864.8092 | 932.9082         | 1863.8252       | 932.4162         | 17 |
| 11 | 1190.6640        | 595.8357         | 1173.6375 | 587.3224         | 1172.6535      | 586.8304         | H    | 1780.7880        | 890.8977        | 1763.7615 | 882.3844         | 1762.7775       | 881.8924         | 16 |
| 12 | 1289.7324        | <b>645.3699</b>  | 1272.7059 | 636.8566         | 1271.7219      | 636.3646         | V    | <b>1643.7291</b> | 822.3682        | 1626.7026 | 813.8549         | 1625.7186       | 813.3629         | 15 |
| 13 | 1404.7594        | <b>702.8833</b>  | 1387.7328 | 694.3701         | 1386.7488      | 693.8781         | N    | <b>1544.6607</b> | 772.8340        | 1527.6342 | 764.3207         | 1526.6502       | 763.8287         | 14 |
| 14 | 1503.8278        | <b>752.4175</b>  | 1486.8013 | 743.9043         | 1485.8172      | 743.4123         | V    | <b>1429.6338</b> | 715.3205        |           |                  | 1411.6232       | 706.3152         | 13 |
| 15 | 1590.8598        | 795.9336         | 1573.8333 | 787.4203         | 1572.8493      | 786.9283         | S    | <b>1330.5654</b> | 665.7863        |           |                  | 1312.5548       | 656.7810         | 12 |
| 16 | 1689.9282        | <b>845.4678</b>  | 1672.9017 | 836.9545         | 1671.9177      | 836.4625         | V    | 1243.5333        | 622.2703        |           |                  | 1225.5228       | 613.2650         | 11 |
| 17 | 1788.9967        | <b>895.0020</b>  | 1771.9701 | 886.4887         | 1770.9861      | 885.9967         | V    | 1144.4649        | 572.7361        |           |                  | 1126.4544       | 563.7308         | 10 |
| 18 | 1920.0371        | 960.5222         | 1903.0106 | 952.0089         | 1902.0266      | 951.5169         | M    | 1045.3965        | 523.2019        |           |                  | 1027.3859       | 514.1966         | 9  |
| 19 | <b>1991.0743</b> | <b>996.0408</b>  | 1974.0477 | 987.5275         | 1973.0637      | 987.0355         | A    | 914.3560         | 457.6817        |           |                  | <b>896.3455</b> | 448.6764         | 8  |
| 20 | 2120.1169        | <b>1060.5621</b> | 2103.0903 | 1052.0488        | 2102.1063      | 1051.5568        | E    | 843.3189         | 422.1631        |           |                  | <b>825.3083</b> | 413.1578         | 7  |
| 21 | 2219.1853        | <b>1110.0963</b> | 2202.1587 | 1101.5830        | 2201.1747      | 1101.0910        | V    | 714.2763         | 357.6418        |           |                  | 696.2658        | 348.6365         | 6  |
| 22 | 2334.2122        | <b>1167.6097</b> | 2317.1857 | 1159.0965        | 2316.2016      | 1158.6045        | D    | <b>615.2079</b>  | 308.1076        |           |                  | 597.1973        | 299.1023         | 5  |
| 23 | 2391.2337        | 1196.1205        | 2374.2071 | 1187.6072        | 2373.2231      | 1187.1152        | G    | <b>500.1810</b>  | 250.5941        |           |                  | <b>482.1704</b> | 241.5888         | 4  |

|    |           |                  |           |           |           |           |   |                 |          |  |  |          |          |   |
|----|-----------|------------------|-----------|-----------|-----------|-----------|---|-----------------|----------|--|--|----------|----------|---|
| 24 | 2492.2814 | <b>1246.6443</b> | 2475.2548 | 1238.1310 | 2474.2708 | 1237.6390 | T | <b>443.1595</b> | 222.0834 |  |  | 425.1489 | 213.0781 | 3 |
| 25 | 2652.3120 | 1326.6596        | 2635.2855 | 1318.1464 | 2634.3014 | 1317.6544 | C | <b>342.1118</b> | 171.5595 |  |  |          |          | 2 |
| 26 |           |                  |           |           |           |           | Y | 182.0812        | 91.5442  |  |  |          |          | 1 |

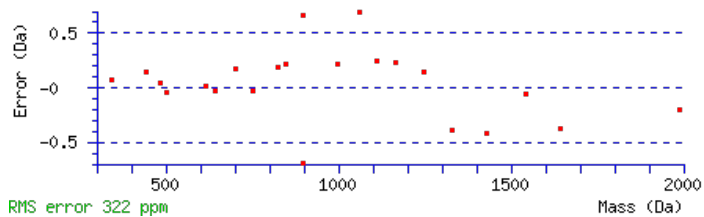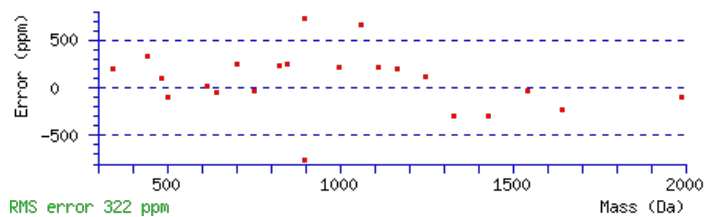

NCBI BLAST search of [TIDRLAGKPTHVNVSVVMAEVDGTCY](#)  
 (Parameters: blastp, nr protein database, expect=20000, no filter, PAM30)  
 Other BLAST [web gateways](#)

All matches to this query

| Score | Mr(calc)  | Delta   | Sequence                                    |
|-------|-----------|---------|---------------------------------------------|
| 57.6  | 2832.3786 | 0.0085  | <a href="#">TIDRLAGKPTHVNVSVVMAEVDGTCY</a>  |
| 44.8  | 2831.3946 | 0.9925  | <a href="#">TIDRLAGKPTHVNVSVVMAEVDGTCY</a>  |
| 8.8   | 2832.3963 | -0.0092 | <a href="#">QVNSALKQKMEGGIEEFKPPESNOK</a>   |
| 8.8   | 2832.3963 | -0.0092 | <a href="#">QVNSALKQKMEGGIEEFKPPESNOK</a>   |
| 4.0   | 2832.3963 | -0.0092 | <a href="#">QVNSALKQKMEGGIEEFKPPESNOK</a>   |
| 3.7   | 2830.3742 | 2.0129  | <a href="#">LRNLNLLVDSAHRFTQICSDAPSAM</a>   |
| 3.0   | 2830.3840 | 2.0031  | <a href="#">SQPQGLVSLMGSPVAESAEQMAEARIK</a> |
| 3.0   | 2830.3840 | 2.0031  | <a href="#">SQPQGLVSLMGSPVAESAEQMAEARIK</a> |
| 2.9   | 2832.3963 | -0.0092 | <a href="#">QVNSALKQKMEGGIEEFKPPESNOK</a>   |
| 2.9   | 2832.3963 | -0.0092 | <a href="#">QVNSALKQKMEGGIEEFKPPESNOK</a>   |

Mascot: <http://www.matrixscience.com/>



# MASCOT SCIENCE Mascot Search Results

## Peptide View

MS/MS Fragmentation of **TPLTANITK**

Found in **P01877** in **con\_Xuniprot\_HUMAN3**, IGHA2\_HUMAN Ig alpha-2 chain C region OS=Homo sapiens GN=IGHA2 PE=1 SV=3

Match to Query 90: 958.534888 from(480.274720,2+) intensity(4797.5962) rtinseconds(584) scans(1092) index(11575)

Title: 111019\_Est\_ISCardio\_NMI\_YS\_G\_8Spectrum908\_scans\_\_1092

Data file C:\mascot\20140703\_Tmgf\_1D\CSV\_UseAnalysis\MasterCSV\All\_Glyco\mgf\ptm\UC18ERLIC\_PTM\_35D.mgf

Click mouse within plot area to zoom in by factor of two about that point

Or,  to  Da

Label all possible matches  Label matches used for scoring

Show Y-axis

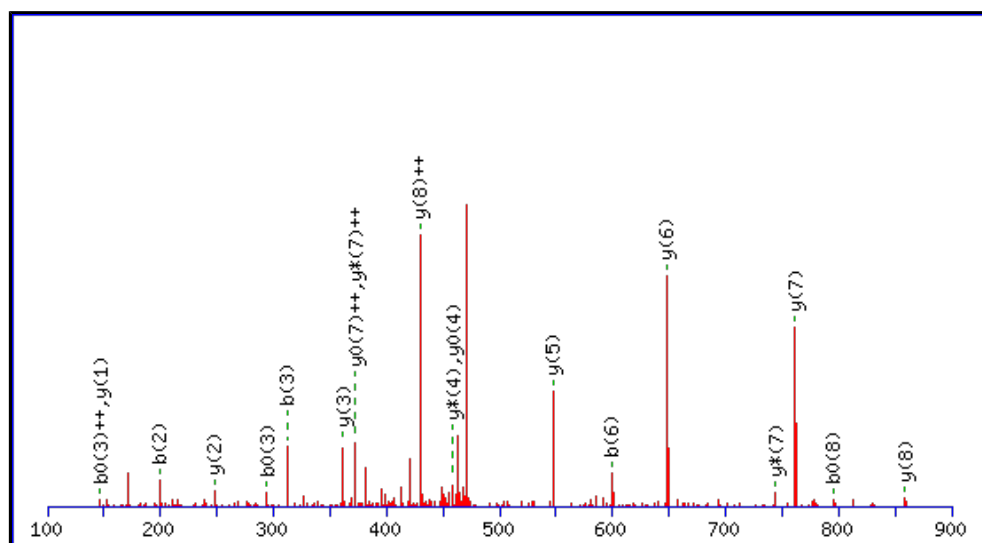

Monoisotopic mass of neutral peptide Mr(calc): 958.5335

Fixed modifications: Carbamidomethyl (C) (apply to specified residues or termini only)

Variable modifications:

N6 : Deamidated (NQ)

Ions Score: 61 Expect: 0.00017

Matches : 19/84 fragment ions using 23 most intense peaks ([help](#))

| # | b               | b <sup>++</sup> | b*       | b <sup>***</sup> | b <sup>0</sup>  | b <sup>0++</sup> | Seq. | y               | y <sup>++</sup> | y*              | y <sup>***</sup> | y <sup>0</sup>  | y <sup>0++</sup> | # |
|---|-----------------|-----------------|----------|------------------|-----------------|------------------|------|-----------------|-----------------|-----------------|------------------|-----------------|------------------|---|
| 1 | 102.0550        | 51.5311         |          |                  | 84.0444         | 42.5258          | T    |                 |                 |                 |                  |                 |                  | 9 |
| 2 | <b>199.1077</b> | 100.0575        |          |                  | 181.0972        | 91.0522          | P    | <b>858.4931</b> | <b>429.7502</b> | 841.4666        | 421.2369         | 840.4825        | 420.7449         | 8 |
| 3 | <b>312.1918</b> | 156.5995        |          |                  | <b>294.1812</b> | <b>147.5942</b>  | L    | <b>761.4403</b> | 381.2238        | <b>744.4138</b> | <b>372.7105</b>  | 743.4298        | <b>372.2185</b>  | 7 |
| 4 | 413.2395        | 207.1234        |          |                  | 395.2289        | 198.1181         | T    | <b>648.3563</b> | 324.6818        | 631.3297        | 316.1685         | 630.3457        | 315.6765         | 6 |
| 5 | 484.2766        | 242.6419        |          |                  | 466.2660        | 233.6366         | A    | <b>547.3086</b> | 274.1579        | 530.2821        | 265.6447         | 529.2980        | 265.1527         | 5 |
| 6 | <b>599.3035</b> | 300.1554        | 582.2770 | 291.6421         | 581.2930        | 291.1501         | N    | 476.2715        | 238.6394        | <b>459.2449</b> | 230.1261         | <b>458.2609</b> | 229.6341         | 4 |
| 7 | 712.3876        | 356.6974        | 695.3610 | 348.1842         | 694.3770        | 347.6921         | I    | <b>361.2445</b> | 181.1259        | 344.2180        | 172.6126         | 343.2340        | 172.1206         | 3 |
| 8 | 813.4353        | 407.2213        | 796.4087 | 398.7080         | <b>795.4247</b> | 398.2160         | T    | <b>248.1605</b> | 124.5839        | 231.1339        | 116.0706         | 230.1499        | 115.5786         | 2 |
| 9 |                 |                 |          |                  |                 |                  | K    | <b>147.1128</b> | 74.0600         | 130.0863        | 65.5468          |                 |                  | 1 |

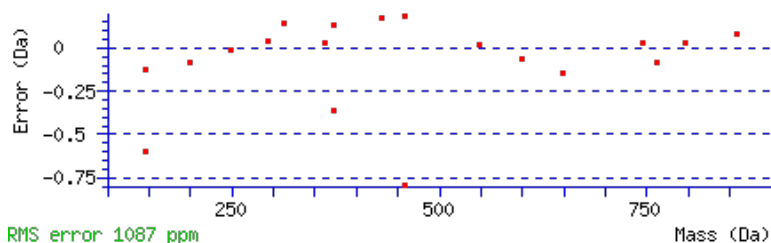

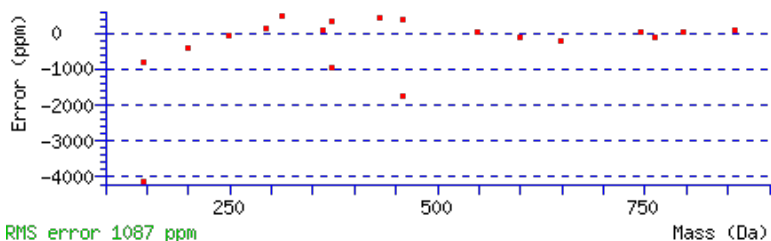

NCBI **BLAST** search of [TPLTANITK](#)

(Parameters: blastp, nr protein database, expect=20000, no filter, PAM30)

Other BLAST [web gateways](#)

**All matches to this query**

| Score | Mr(calc) | Delta  | Sequence                  |
|-------|----------|--------|---------------------------|
| 60.8  | 958.5335 | 0.0014 | <a href="#">TPLTANITK</a> |
| 12.7  | 958.5349 | 0.0000 | <a href="#">TFIGKTHR</a>  |
| 8.5   | 958.5335 | 0.0014 | <a href="#">TPTTALLDK</a> |
| 8.4   | 958.5335 | 0.0014 | <a href="#">SLNSVPLTK</a> |
| 8.0   | 958.5335 | 0.0014 | <a href="#">TINATLPTK</a> |
| 7.5   | 956.5291 | 2.0058 | <a href="#">VVEISAPSR</a> |
| 6.0   | 958.5335 | 0.0014 | <a href="#">EEVLQLTK</a>  |
| 5.8   | 956.5291 | 2.0058 | <a href="#">VKAQTAPNK</a> |
| 5.8   | 956.5291 | 2.0058 | <a href="#">VKAQTAPNK</a> |
| 5.2   | 957.5317 | 1.0032 | <a href="#">VPTLLROM</a>  |

Mascot: <http://www.matrixscience.com/>

# MASCOT SCIENCE Mascot Search Results

## Peptide View

MS/MS Fragmentation of **MDGSLNFNR**

Found in **P02671** in **con\_Xuniprot\_HUMAN3**, FIBA\_HUMAN Fibrinogen alpha chain OS=Homo sapiens GN=FGA PE=1 SV=2

Match to Query 207: 1053.457028 from(527.735790,2+) intensity(5731.5474) rtinseconds(792) scans(1417) index(28810)

Title: 111019\_Est\_MI\_YS\_G\_15Spectrum1157\_scans\_\_1417

Data file C:\mascot\20140703\_Tmgf\_1D\CSV\_UseAnalysis\MasterCSV\All\_Glyco\mgf\ptm\UC18ERLIC\_PTM\_35D.mgf

Click mouse within plot area to zoom in by factor of two about that point

Or, to Da

Label all possible matches Label matches used for scoring

Show Y-axis

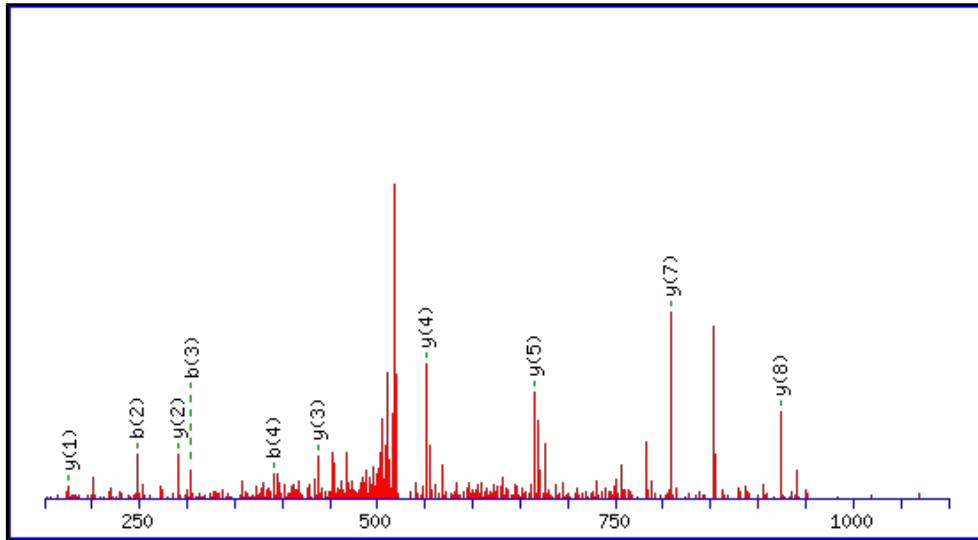

Monoisotopic mass of neutral peptide  $M_r(\text{calc})$ : 1053.4549

Fixed modifications: Carbamidomethyl (C) (apply to specified residues or termini only)

Variable modifications:

N8 : Deamidated (NQ)

Ions Score: 43 Expect: 0.0034

Matches : 10/74 fragment ions using 26 most intense peaks ([help](#))

| # | b               | b <sup>++</sup> | b <sup>*</sup> | b <sup>***</sup> | b <sup>0</sup> | b <sup>0++</sup> | Seq. | y               | y <sup>++</sup> | y <sup>*</sup> | y <sup>***</sup> | y <sup>0</sup> | y <sup>0++</sup> | # |
|---|-----------------|-----------------|----------------|------------------|----------------|------------------|------|-----------------|-----------------|----------------|------------------|----------------|------------------|---|
| 1 | 132.0478        | 66.5275         |                |                  |                |                  | M    |                 |                 |                |                  |                |                  | 9 |
| 2 | <b>247.0747</b> | 124.0410        |                |                  | 229.0641       | 115.0357         | D    | <b>923.4217</b> | 462.2145        | 906.3952       | 453.7012         | 905.4112       | 453.2092         | 8 |
| 3 | <b>304.0962</b> | 152.5517        |                |                  | 286.0856       | 143.5464         | G    | <b>808.3948</b> | 404.7010        | 791.3682       | 396.1878         | 790.3842       | 395.6958         | 7 |
| 4 | <b>391.1282</b> | 196.0677        |                |                  | 373.1176       | 187.0625         | S    | 751.3733        | 376.1903        | 734.3468       | 367.6770         | 733.3628       | 367.1850         | 6 |
| 5 | 504.2123        | 252.6098        |                |                  | 486.2017       | 243.6045         | L    | <b>664.3413</b> | 332.6743        | 647.3148       | 324.1610         |                |                  | 5 |
| 6 | 618.2552        | 309.6312        | 601.2286       | 301.1180         | 600.2446       | 300.6259         | N    | <b>551.2572</b> | 276.1323        | 534.2307       | 267.6190         |                |                  | 4 |
| 7 | 765.3236        | 383.1654        | 748.2971       | 374.6522         | 747.3130       | 374.1602         | F    | <b>437.2143</b> | 219.1108        | 420.1878       | 210.5975         |                |                  | 3 |
| 8 | 880.3505        | 440.6789        | 863.3240       | 432.1656         | 862.3400       | 431.6736         | N    | <b>290.1459</b> | 145.5766        | 273.1193       | 137.0633         |                |                  | 2 |
| 9 |                 |                 |                |                  |                |                  | R    | <b>175.1190</b> | 88.0631         | 158.0924       | 79.5498          |                |                  | 1 |

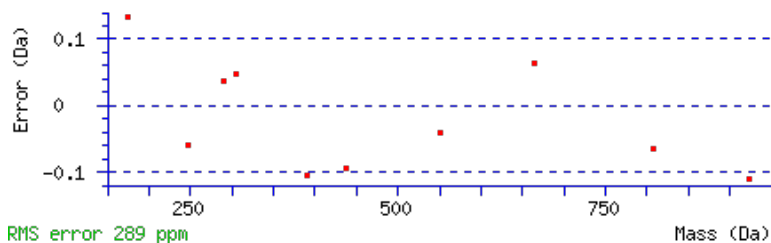

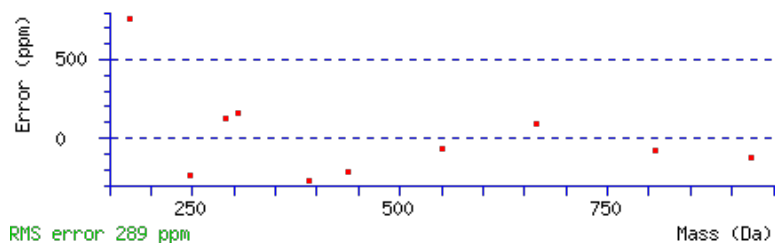

NCBI **BLAST** search of [MDGSLNFNR](#)

(Parameters: blastp, nr protein database, expect=20000, no filter, PAM30)

Other BLAST [web gateways](#)

**All matches to this query**

| Score | Mr(calc)  | Delta   | Sequence                  | Site Analysis        |
|-------|-----------|---------|---------------------------|----------------------|
| 42.7  | 1053.4549 | 0.0021  | <a href="#">MDGSLNFNR</a> | Deamidated N8 99.25% |
| 21.4  | 1053.4549 | 0.0021  | <a href="#">MDGSLNFNR</a> | Deamidated N6 0.75%  |
| 6.5   | 1052.4523 | 1.0048  | <a href="#">EAREYNDR</a>  |                      |
| 5.8   | 1053.4614 | -0.0044 | <a href="#">EYSQLEQR</a>  |                      |
| 5.7   | 1053.4549 | 0.0021  | <a href="#">FNEITCNR</a>  |                      |
| 5.1   | 1053.4549 | 0.0021  | <a href="#">NMDKFQDR</a>  |                      |
| 4.8   | 1053.4549 | 0.0021  | <a href="#">QNMLNDFR</a>  |                      |
| 4.8   | 1053.4549 | 0.0021  | <a href="#">QNMLNDFR</a>  |                      |
| 4.7   | 1053.4614 | -0.0044 | <a href="#">LSQEEYER</a>  |                      |
| 4.2   | 1053.4588 | -0.0017 | <a href="#">NHQEQQDR</a>  |                      |

Mascot: <http://www.matrixscience.com/>

# MATRIX SCIENCE Mascot Search Results

## Peptide View

MS/MS Fragmentation of **GTAGNALMDGASQLMGENR**

Found in **D6REL8** in **con\_Xuniprot\_HUMAN3**, D6REL8\_HUMAN Fibrinogen beta chain OS=Homo sapiens GN=FGB PE=2 SV=1

Match to Query 11494: 1908.838568 from(955.426560,2+) intensity(338346.1563) rtinseconds(1251) scans(3000) index(1961)

Title: 111019\_Est\_ISCardio\_NMI\_YP\_G\_4Spectrum2556\_scans\_\_3000

Data file C:\\mascot\\20140703\_Tmgf\_1D\\CSV\_UseAnalysis\\MasterCSV\\All\_Glyco\\mgf\\ptm\\UC18ERLIC\_PTM\_35D.mgf

Click mouse within plot area to zoom in by factor of two about that point

Or, to Da

Label all possible matches Label matches used for scoring

Show Y-axis

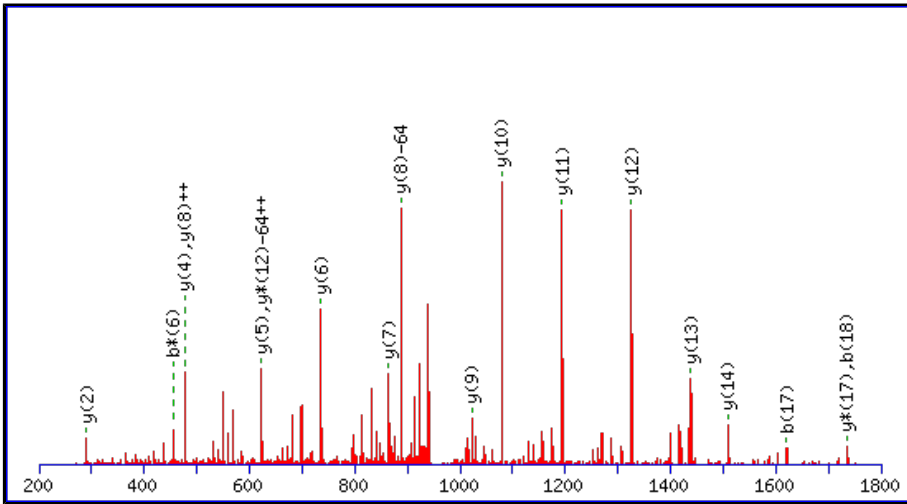

**Monoisotopic mass of neutral peptide Mr(calc):** 1908.8306

**Fixed modifications:** Carbamidomethyl (C) (apply to specified residues or termini only)

**Variable modifications:**

**M15** : Oxidation (M), with neutral losses 0.0000(shown in table), 63.9983

**N18** : Deamidated (NQ)

**Ions Score:** 113 **Expect:** 5e-010

**Matches** : 18/310 fragment ions using 15 most intense peaks ([help](#))

| #  | b                | b <sup>++</sup> | b*              | b <sup>+++</sup> | b <sup>0</sup> | b <sup>0++</sup> | Seq.     | y                | y <sup>++</sup> | y*               | y <sup>+++</sup> | y <sup>0</sup> | y <sup>0++</sup> | #         |
|----|------------------|-----------------|-----------------|------------------|----------------|------------------|----------|------------------|-----------------|------------------|------------------|----------------|------------------|-----------|
| 1  | 58.0287          | 29.5180         |                 |                  |                |                  | <b>G</b> |                  |                 |                  |                  |                |                  | <b>19</b> |
| 2  | 159.0764         | 80.0418         |                 |                  | 141.0659       | 71.0366          | <b>T</b> | 1852.8164        | 926.9118        | 1835.7898        | 918.3986         | 1834.8058      | 917.9066         | <b>18</b> |
| 3  | 230.1135         | 115.5604        |                 |                  | 212.1030       | 106.5551         | <b>A</b> | 1751.7687        | 876.3880        | <b>1734.7422</b> | 867.8747         | 1733.7581      | 867.3827         | <b>17</b> |
| 4  | 287.1350         | 144.0711        |                 |                  | 269.1244       | 135.0659         | <b>G</b> | 1680.7316        | 840.8694        | 1663.7050        | 832.3562         | 1662.7210      | 831.8642         | <b>16</b> |
| 5  | 401.1779         | 201.0926        | 384.1514        | 192.5793         | 383.1674       | 192.0873         | <b>N</b> | 1623.7101        | 812.3587        | 1606.6836        | 803.8454         | 1605.6996      | 803.3534         | <b>15</b> |
| 6  | 472.2150         | 236.6112        | <b>455.1885</b> | 228.0979         | 454.2045       | 227.6059         | <b>A</b> | <b>1509.6672</b> | 755.3372        | 1492.6407        | 746.8240         | 1491.6566      | 746.3320         | <b>14</b> |
| 7  | 585.2991         | 293.1532        | 568.2726        | 284.6399         | 567.2885       | 284.1479         | <b>L</b> | <b>1438.6301</b> | 719.8187        | 1421.6035        | 711.3054         | 1420.6195      | 710.8134         | <b>13</b> |
| 8  | 716.3396         | 358.6734        | 699.3130        | 350.1602         | 698.3290       | 349.6681         | <b>M</b> | <b>1325.5460</b> | 663.2767        | 1308.5195        | 654.7634         | 1307.5355      | 654.2714         | <b>12</b> |
| 9  | 831.3665         | 416.1869        | 814.3400        | 407.6736         | 813.3560       | 407.1816         | <b>D</b> | <b>1194.5055</b> | 597.7564        | 1177.4790        | 589.2431         | 1176.4950      | 588.7511         | <b>11</b> |
| 10 | 888.3880         | 444.6976        | 871.3614        | 436.1844         | 870.3774       | 435.6924         | <b>G</b> | <b>1079.4786</b> | 540.2429        | 1062.4521        | 531.7297         | 1061.4680      | 531.2377         | <b>10</b> |
| 11 | 959.4251         | 480.2162        | 942.3986        | 471.7029         | 941.4145       | 471.2109         | <b>A</b> | <b>1022.4571</b> | 511.7322        | 1005.4306        | 503.2189         | 1004.4466      | 502.7269         | <b>9</b>  |
| 12 | 1046.4571        | 523.7322        | 1029.4306       | 515.2189         | 1028.4466      | 514.7269         | <b>S</b> | 951.4200         | <b>476.2136</b> | 934.3935         | 467.7004         | 933.4095       | 467.2084         | <b>8</b>  |
| 13 | 1174.5157        | 587.7615        | 1157.4892       | 579.2482         | 1156.5051      | 578.7562         | <b>Q</b> | <b>864.3880</b>  | 432.6976        | 847.3614         | 424.1844         | 846.3774       | 423.6924         | <b>7</b>  |
| 14 | 1287.5998        | 644.3035        | 1270.5732       | 635.7903         | 1269.5892      | 635.2982         | <b>L</b> | <b>736.3294</b>  | 368.6683        | 719.3029         | 360.1551         | 718.3189       | 359.6631         | <b>6</b>  |
| 15 | 1434.6352        | 717.8212        | 1417.6086       | 709.3080         | 1416.6246      | 708.8159         | <b>M</b> | <b>623.2454</b>  | 312.1263        | 606.2188         | 303.6130         | 605.2348       | 303.1210         | <b>5</b>  |
| 16 | 1491.6566        | 746.3320        | 1474.6301       | 737.8187         | 1473.6461      | 737.3267         | <b>G</b> | <b>476.2100</b>  | 238.6086        | 459.1834         | 230.0953         | 458.1994       | 229.6033         | <b>4</b>  |
| 17 | <b>1620.6992</b> | 810.8533        | 1603.6727       | 802.3400         | 1602.6887      | 801.8480         | <b>E</b> | 419.1885         | 210.0979        | 402.1619         | 201.5846         | 401.1779       | 201.0926         | <b>3</b>  |
| 18 | <b>1735.7262</b> | 868.3667        | 1718.6996       | 859.8535         | 1717.7156      | 859.3614         | <b>N</b> | <b>290.1459</b>  | 145.5766        | 273.1193         | 137.0633         |                |                  | <b>2</b>  |
| 19 |                  |                 |                 |                  |                |                  | <b>R</b> | 175.1190         | 88.0631         | 158.0924         | 79.5498          |                |                  | <b>1</b>  |

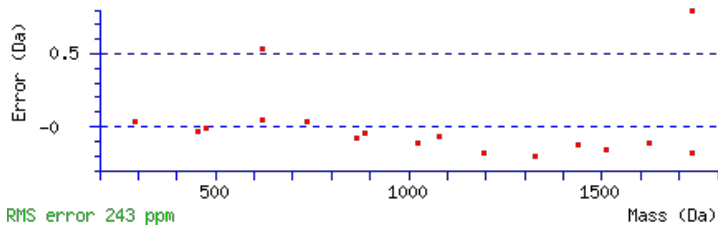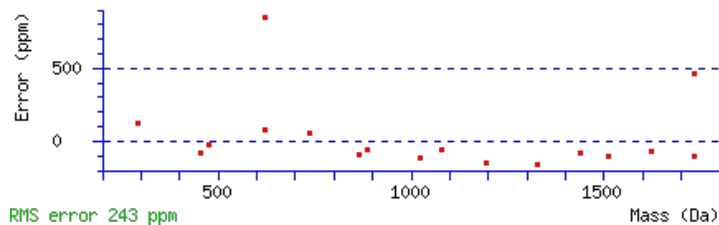

NCBI **BLAST** search of [GTAGNALMDGASQLMGENR](#)  
 (Parameters: blastp, nr protein database, expect=20000, no filter, PAM30)  
 Other BLAST [web gateways](#)

**All matches to this query**

| Score | Mr(calc)  | Delta  | Sequence                            | Site Analysis                          |
|-------|-----------|--------|-------------------------------------|----------------------------------------|
| 113.1 | 1908.8306 | 0.0080 | <a href="#">GTAGNALMDGASQLMGENR</a> | Deamidated N18, Oxidation M15; 100.00% |
| 45.8  | 1908.8306 | 0.0080 | <a href="#">GTAGNALMDGASQLMGENR</a> | Deamidated Q13, Oxidation M15; 0.00%   |
| 20.6  | 1908.8306 | 0.0080 | <a href="#">GTAGNALMDGASQLMGENR</a> | Deamidated N18, Oxidation M8; 0.00%    |
| 10.3  | 1908.8306 | 0.0080 | <a href="#">GTAGNALMDGASQLMGENR</a> | Deamidated N5, Oxidation M15; 0.00%    |
| 9.5   | 1908.8306 | 0.0080 | <a href="#">GTAGNALMDGASQLMGENR</a> | Deamidated Q13, Oxidation M8; 0.00%    |

**Mascot:** <http://www.matrixscience.com/>

# MATRIX SCIENCE Mascot Search Results

## Peptide View

MS/MS Fragmentation of **GTAGNALMDGASQLMGENR**

Found in **D6REL8** in **con\_Xuniprot\_HUMAN3**, D6REL8\_HUMAN Fibrinogen beta chain OS=Homo sapiens GN=FGB PE=2 SV=1

Match to Query 11219: 1892.837848 from(947.426200,2+) intensity(28318.0117) rtinseconds(1780) scans(4667) index(4460)

Title: 111019\_Est\_ISCardio\_NMI\_YP\_G\_7Spectrum3956\_scans\_\_4667

Data file C:\mascot\20140703\_Tmgf\_1D\CSV\_UseAnalysis\MasterCSV\All\_Glyco\mgf\ptm\UC18ERLIC\_PTM\_35D.mgf

Click mouse within plot area to zoom in by factor of two about that point

Or, to Da

Label all possible matches Label matches used for scoring

Show Y-axis

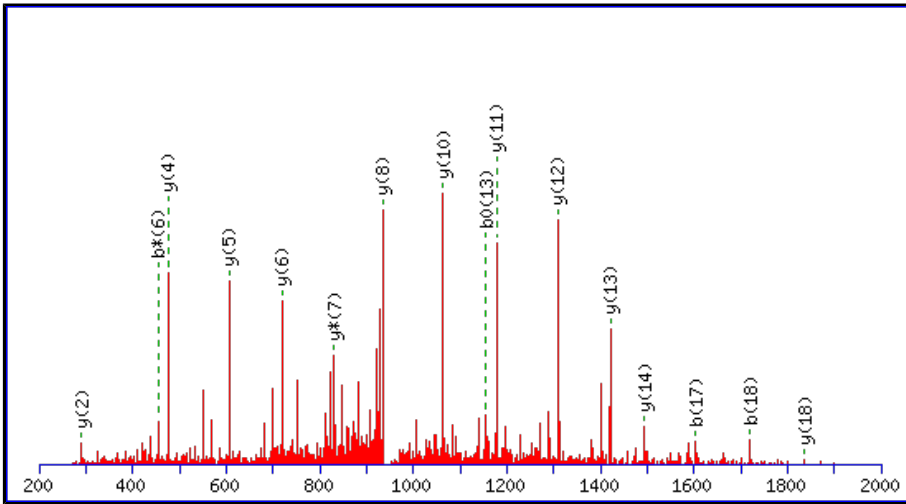

Monoisotopic mass of neutral peptide  $M_r(\text{calc})$ : 1892.8356

Fixed modifications: Carbamidomethyl (C) (apply to specified residues or termini only)

Variable modifications:

N18 : Deamidated (NQ)

Ions Score: 113 Expect: 5.9e-010

Matches : 17/202 fragment ions using 16 most intense peaks ([help](#))

| #  | b                | b <sup>++</sup> | b*              | b <sup>*++</sup> | b <sup>0</sup>   | b <sup>0++</sup> | Seq.     | y                | y <sup>++</sup> | y*              | y <sup>*++</sup> | y <sup>0</sup> | y <sup>0++</sup> | #         |
|----|------------------|-----------------|-----------------|------------------|------------------|------------------|----------|------------------|-----------------|-----------------|------------------|----------------|------------------|-----------|
| 1  | 58.0287          | 29.5180         |                 |                  |                  |                  | <b>G</b> |                  |                 |                 |                  |                |                  | <b>19</b> |
| 2  | 159.0764         | 80.0418         |                 |                  | 141.0659         | 71.0366          | <b>T</b> | <b>1836.8215</b> | 918.9144        | 1819.7949       | 910.4011         | 1818.8109      | 909.9091         | <b>18</b> |
| 3  | 230.1135         | 115.5604        |                 |                  | 212.1030         | 106.5551         | <b>A</b> | 1735.7738        | 868.3905        | 1718.7472       | 859.8773         | 1717.7632      | 859.3853         | <b>17</b> |
| 4  | 287.1350         | 144.0711        |                 |                  | 269.1244         | 135.0659         | <b>G</b> | 1664.7367        | 832.8720        | 1647.7101       | 824.3587         | 1646.7261      | 823.8667         | <b>16</b> |
| 5  | 401.1779         | 201.0926        | 384.1514        | 192.5793         | 383.1674         | 192.0873         | <b>N</b> | 1607.7152        | 804.3612        | 1590.6887       | 795.8480         | 1589.7047      | 795.3560         | <b>15</b> |
| 6  | 472.2150         | 236.6112        | <b>455.1885</b> | 228.0979         | 454.2045         | 227.6059         | <b>A</b> | <b>1493.6723</b> | 747.3398        | 1476.6457       | 738.8265         | 1475.6617      | 738.3345         | <b>14</b> |
| 7  | 585.2991         | 293.1532        | 568.2726        | 284.6399         | 567.2885         | 284.1479         | <b>L</b> | <b>1422.6352</b> | 711.8212        | 1405.6086       | 703.3080         | 1404.6246      | 702.8159         | <b>13</b> |
| 8  | 716.3396         | 358.6734        | 699.3130        | 350.1602         | 698.3290         | 349.6681         | <b>M</b> | <b>1309.5511</b> | 655.2792        | 1292.5246       | 646.7659         | 1291.5405      | 646.2739         | <b>12</b> |
| 9  | <b>831.3665</b>  | 416.1869        | 814.3400        | 407.6736         | 813.3560         | 407.1816         | <b>D</b> | <b>1178.5106</b> | 589.7590        | 1161.4841       | 581.2457         | 1160.5001      | 580.7537         | <b>11</b> |
| 10 | 888.3880         | 444.6976        | 871.3614        | 436.1844         | 870.3774         | 435.6924         | <b>G</b> | <b>1063.4837</b> | 532.2455        | 1046.4571       | 523.7322         | 1045.4731      | 523.2402         | <b>10</b> |
| 11 | 959.4251         | 480.2162        | 942.3986        | 471.7029         | 941.4145         | 471.2109         | <b>A</b> | 1006.4622        | 503.7347        | 989.4357        | 495.2215         | 988.4517       | 494.7295         | <b>9</b>  |
| 12 | 1046.4571        | 523.7322        | 1029.4306       | 515.2189         | 1028.4466        | 514.7269         | <b>S</b> | <b>935.4251</b>  | 468.2162        | 918.3986        | 459.7029         | 917.4145       | 459.2109         | <b>8</b>  |
| 13 | 1174.5157        | 587.7615        | 1157.4892       | 579.2482         | <b>1156.5051</b> | 578.7562         | <b>Q</b> | 848.3931         | 424.7002        | <b>831.3665</b> | 416.1869         | 830.3825       | 415.6949         | <b>7</b>  |
| 14 | 1287.5998        | 644.3035        | 1270.5732       | 635.7903         | 1269.5892        | 635.2982         | <b>L</b> | <b>720.3345</b>  | 360.6709        | 703.3080        | 352.1576         | 702.3239       | 351.6656         | <b>6</b>  |
| 15 | 1418.6403        | 709.8238        | 1401.6137       | 701.3105         | 1400.6297        | 700.8185         | <b>M</b> | <b>607.2504</b>  | 304.1289        | 590.2239        | 295.6156         | 589.2399       | 295.1236         | <b>5</b>  |
| 16 | 1475.6617        | 738.3345        | 1458.6352       | 729.8212         | 1457.6512        | 729.3292         | <b>G</b> | <b>476.2100</b>  | 238.6086        | 459.1834        | 230.0953         | 458.1994       | 229.6033         | <b>4</b>  |
| 17 | <b>1604.7043</b> | 802.8558        | 1587.6778       | 794.3425         | 1586.6938        | 793.8505         | <b>E</b> | 419.1885         | 210.0979        | 402.1619        | 201.5846         | 401.1779       | 201.0926         | <b>3</b>  |
| 18 | <b>1719.7313</b> | 860.3693        | 1702.7047       | 851.8560         | 1701.7207        | 851.3640         | <b>N</b> | <b>290.1459</b>  | 145.5766        | 273.1193        | 137.0633         |                |                  | <b>2</b>  |
| 19 |                  |                 |                 |                  |                  |                  | <b>R</b> | 175.1190         | 88.0631         | 158.0924        | 79.5498          |                |                  | <b>1</b>  |



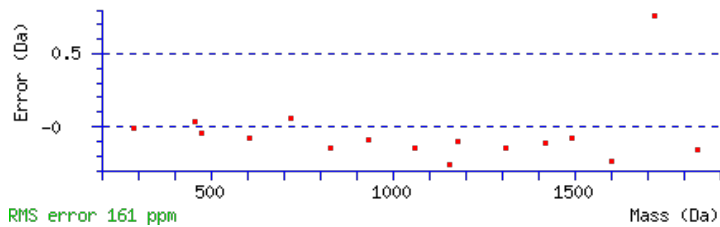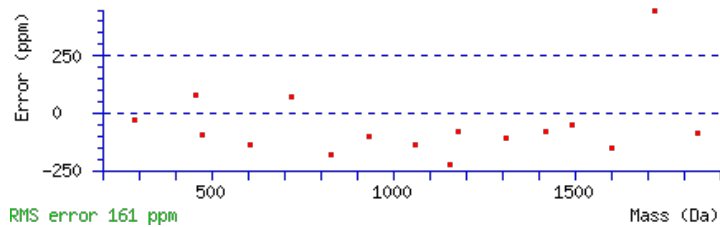

NCBI **BLAST** search of [GTAGNALMDGASQLMGENR](#)

(Parameters: blastp, nr protein database, expect=20000, no filter, PAM30)

Other BLAST [web gateways](#)

**All matches to this query**

| Score | Mr(calc)  | Delta   | Sequence                            | Site Analysis          |
|-------|-----------|---------|-------------------------------------|------------------------|
| 112.8 | 1892.8356 | 0.0022  | <a href="#">GTAGNALMDGASQLMGENR</a> | Deamidated N18 100.00% |
| 42.3  | 1892.8356 | 0.0022  | <a href="#">GTAGNALMDGASQLMGENR</a> | Deamidated Q13 0.00%   |
| 7.5   | 1892.8460 | -0.0081 | <a href="#">ENKQASTSNTRAQGQNR</a>   |                        |
| 5.0   | 1892.8356 | 0.0022  | <a href="#">GTAGNALMDGASQLMGENR</a> | Deamidated N5 0.00%    |
| 3.9   | 1892.8460 | -0.0081 | <a href="#">ENKQASTSNTRAQGQNR</a>   |                        |
| 3.9   | 1892.8460 | -0.0081 | <a href="#">ENKQASTSNTRAQGQNR</a>   |                        |
| 1.3   | 1892.8460 | -0.0081 | <a href="#">ENKQASTSNTRAQGQNR</a>   |                        |

Mascot: <http://www.matrixscience.com/>

# MASCOT SCIENCE Mascot Search Results

## Peptide View

MS/MS Fragmentation of **GTAGNALMDGASQLMGENR**

Found in **D6REL8** in **con\_Xuniprot\_HUMAN3**, D6REL8\_HUMAN Fibrinogen beta chain OS=Homo sapiens GN=FGB PE=2 SV=1

Match to Query 11695: 1924.832728 from(963.423640,2+) intensity(230297.8750) rtinseconds(944) scans(2139) index(9372)

Title: 111019\_Est\_ISCardio\_NMI\_YS\_G\_5Spectrum1806\_scans\_\_2139

Data file C:\\mascot\\20140703\_Tmgf\_1D\\CSV\_UseAnalysis\\MasterCSV\\All\_Glyco\\mgf\\ptm\\UC18ERLIC\_PTM\_35D.mgf

Click mouse within plot area to zoom in by factor of two about that point

Or, to Da

Label all possible matches Label matches used for scoring

Show Y-axis

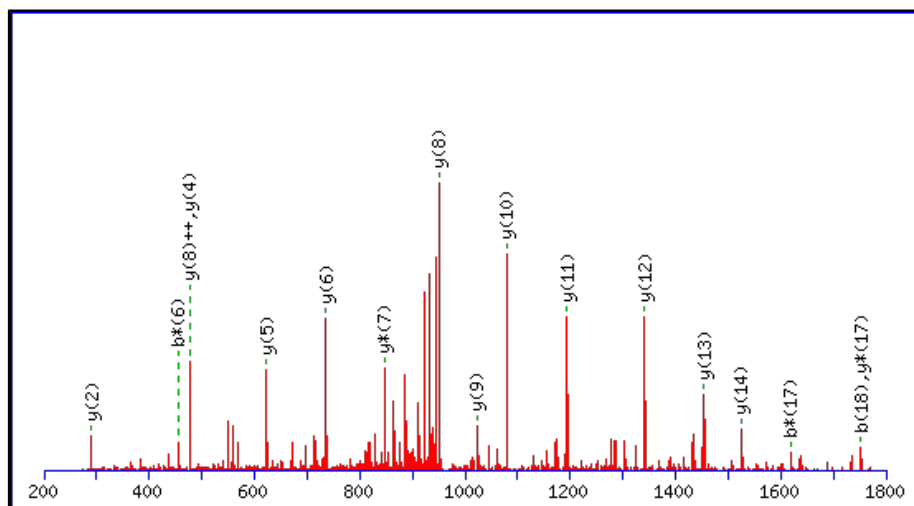

Monoisotopic mass of neutral peptide Mr(calc): 1924.8255

Fixed modifications: Carbamidomethyl (C) (apply to specified residues or termini only)

Variable modifications:

M8 : Oxidation (M), with neutral losses 0.0000(shown in table), 63.9983

M15 : Oxidation (M), with neutral losses 0.0000(shown in table), 63.9983

N18 : Deamidated (NQ)

Ions Score: 113 Expect: 4.3e-010

Matches : 18/352 fragment ions using 15 most intense peaks ([help](#))

| #  | b         | b <sup>++</sup> | b <sup>*</sup> | b <sup>*++</sup> | b <sup>0</sup> | b <sup>0++</sup> | Seq. | y         | y <sup>++</sup> | y <sup>*</sup> | y <sup>*++</sup> | y <sup>0</sup> | y <sup>0++</sup> | #  |
|----|-----------|-----------------|----------------|------------------|----------------|------------------|------|-----------|-----------------|----------------|------------------|----------------|------------------|----|
| 1  | 58.0287   | 29.5180         |                |                  |                |                  | G    |           |                 |                |                  |                |                  | 19 |
| 2  | 159.0764  | 80.0418         |                |                  | 141.0659       | 71.0366          | T    | 1868.8113 | 934.9093        | 1851.7848      | 926.3960         | 1850.8007      | 925.9040         | 18 |
| 3  | 230.1135  | 115.5604        |                |                  | 212.1030       | 106.5551         | A    | 1767.7636 | 884.3855        | 1750.7371      | 875.8722         | 1749.7531      | 875.3802         | 17 |
| 4  | 287.1350  | 144.0711        |                |                  | 269.1244       | 135.0659         | G    | 1696.7265 | 848.8669        | 1679.7000      | 840.3536         | 1678.7159      | 839.8616         | 16 |
| 5  | 401.1779  | 201.0926        | 384.1514       | 192.5793         | 383.1674       | 192.0873         | N    | 1639.7050 | 820.3562        | 1622.6785      | 811.8429         | 1621.6945      | 811.3509         | 15 |
| 6  | 472.2150  | 236.6112        | 455.1885       | 228.0979         | 454.2045       | 227.6059         | A    | 1525.6621 | 763.3347        | 1508.6356      | 754.8214         | 1507.6516      | 754.3294         | 14 |
| 7  | 585.2991  | 293.1532        | 568.2726       | 284.6399         | 567.2885       | 284.1479         | L    | 1454.6250 | 727.8161        | 1437.5985      | 719.3029         | 1436.6144      | 718.8109         | 13 |
| 8  | 732.3345  | 366.6709        | 715.3080       | 358.1576         | 714.3239       | 357.6656         | M    | 1341.5409 | 671.2741        | 1324.5144      | 662.7608         | 1323.5304      | 662.2688         | 12 |
| 9  | 847.3614  | 424.1844        | 830.3349       | 415.6711         | 829.3509       | 415.1791         | D    | 1194.5055 | 597.7564        | 1177.4790      | 589.2431         | 1176.4950      | 588.7511         | 11 |
| 10 | 904.3829  | 452.6951        | 887.3564       | 444.1818         | 886.3723       | 443.6898         | G    | 1079.4786 | 540.2429        | 1062.4521      | 531.7297         | 1061.4680      | 531.2377         | 10 |
| 11 | 975.4200  | 488.2136        | 958.3935       | 479.7004         | 957.4095       | 479.2084         | A    | 1022.4571 | 511.7322        | 1005.4306      | 503.2189         | 1004.4466      | 502.7269         | 9  |
| 12 | 1062.4521 | 531.7297        | 1045.4255      | 523.2164         | 1044.4415      | 522.7244         | S    | 951.4200  | 476.2136        | 934.3935       | 467.7004         | 933.4095       | 467.2084         | 8  |
| 13 | 1190.5106 | 595.7590        | 1173.4841      | 587.2457         | 1172.5001      | 586.7537         | Q    | 864.3880  | 432.6976        | 847.3614       | 424.1844         | 846.3774       | 423.6924         | 7  |
| 14 | 1303.5947 | 652.3010        | 1286.5681      | 643.7877         | 1285.5841      | 643.2957         | L    | 736.3294  | 368.6683        | 719.3029       | 360.1551         | 718.3189       | 359.6631         | 6  |
| 15 | 1450.6301 | 725.8187        | 1433.6035      | 717.3054         | 1432.6195      | 716.8134         | M    | 623.2454  | 312.1263        | 606.2188       | 303.6130         | 605.2348       | 303.1210         | 5  |
| 16 | 1507.6516 | 754.3294        | 1490.6250      | 745.8161         | 1489.6410      | 745.3241         | G    | 476.2100  | 238.6086        | 459.1834       | 230.0953         | 458.1994       | 229.6033         | 4  |
| 17 | 1636.6942 | 818.8507        | 1619.6676      | 810.3374         | 1618.6836      | 809.8454         | E    | 419.1885  | 210.0979        | 402.1619       | 201.5846         | 401.1779       | 201.0926         | 3  |
| 18 | 1751.7211 | 876.3642        | 1734.6945      | 867.8509         | 1733.7105      | 867.3589         | N    | 290.1459  | 145.5766        | 273.1193       | 137.0633         |                |                  | 2  |
| 19 |           |                 |                |                  |                |                  | R    | 175.1190  | 88.0631         | 158.0924       | 79.5498          |                |                  | 1  |

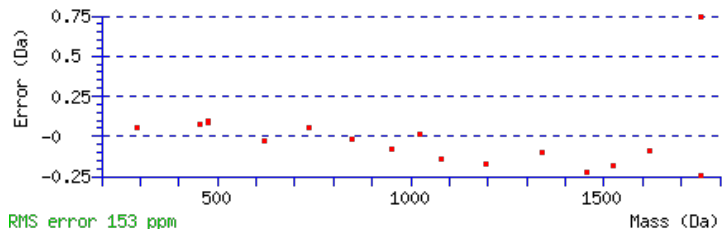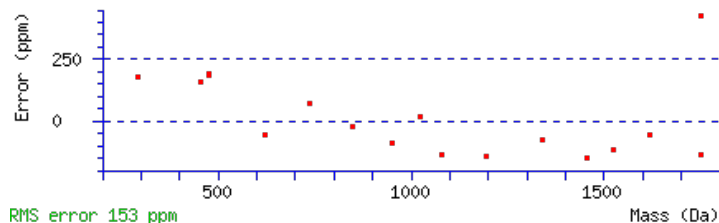

NCBI BLAST search of [GTAGNALMDGASQLMGENR](#)

(Parameters: blastp, nr protein database, expect=20000, no filter, PAM30)

Other BLAST [web gateways](#)

**All matches to this query**

| Score | Mr(calc)  | Delta   | Sequence                            | Site Analysis          |
|-------|-----------|---------|-------------------------------------|------------------------|
| 112.7 | 1924.8255 | 0.0073  | <a href="#">GTAGNALMDGASQLMGENR</a> | Deamidated N18 100.00% |
| 45.5  | 1924.8255 | 0.0073  | <a href="#">GTAGNALMDGASQLMGENR</a> | Deamidated Q13 0.00%   |
| 11.5  | 1924.8255 | 0.0073  | <a href="#">GTAGNALMDGASQLMGENR</a> | Deamidated N5 0.00%    |
| 7.3   | 1924.8360 | -0.0033 | <a href="#">ALANVFDDLEVVMGNENR</a>  |                        |
| 5.3   | 1924.8393 | -0.0066 | <a href="#">MQIEMENKGENSDLIR</a>    |                        |
| 3.9   | 1924.8393 | -0.0066 | <a href="#">MQIEMENKGENSDLIR</a>    |                        |
| 3.4   | 1924.8407 | -0.0080 | <a href="#">AWMAVDGAVGSAPNSSMR</a>  |                        |

Mascot: <http://www.matrixscience.com/>

# MATRIX SCIENCE Mascot Search Results

## Peptide View

MS/MS Fragmentation of **GTAGNALMDGASQLMGENR**

Found in **D6REL8** in **con\_Xuniprot\_HUMAN3**, D6REL8\_HUMAN Fibrinogen beta chain OS=Homo sapiens GN=FGB PE=2 SV=1

Match to Query 11499: 1908.838848 from(955.426700,2+) intensity(175680.4531) rtinseconds(1331) scans(3219) index(14466)

Title: 111019\_Est\_MI\_YP\_G\_03Spectrum2751\_scans\_\_3219

Data file C:\\mascot\\20140703\_Tmgf\_1D\\CSV\_UseAnalysis\\MasterCSV\\All\_Glyco\\mgf\\ptm\\UC18ERLIC\_PTM\_35D.mgf

Click mouse within plot area to zoom in by factor of two about that point

Or, to Da

Label all possible matches Label matches used for scoring

Show Y-axis

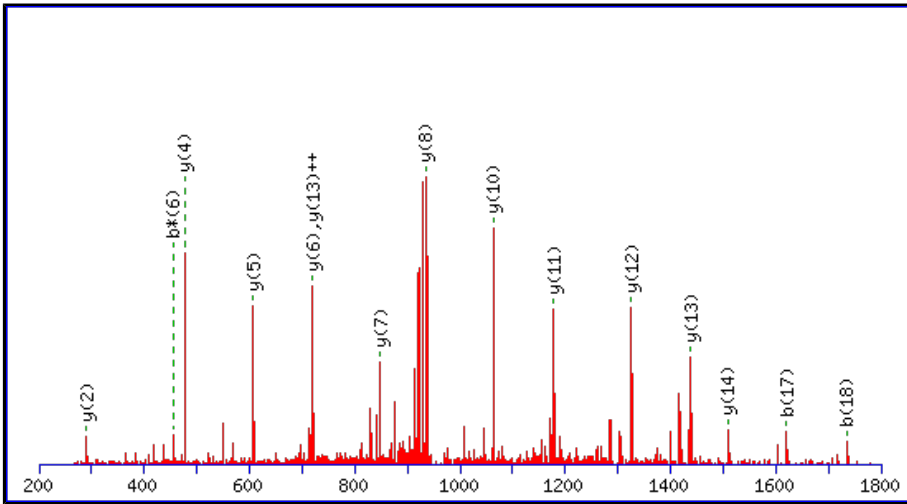

Monoisotopic mass of neutral peptide Mr(calc): 1908.8306

Fixed modifications: Carbamidomethyl (C) (apply to specified residues or termini only)

Variable modifications:

M8 : Oxidation (M), with neutral losses 0.0000(shown in table), 63.9983

N18 : Deamidated (NQ)

Ions Score: 100 Expect: 9.4e-009

Matches : 15/310 fragment ions using 16 most intense peaks ([help](#))

| #  | b                | b <sup>++</sup> | b <sup>*</sup>  | b <sup>*++</sup> | b <sup>0</sup> | b <sup>0++</sup> | Seq.     | y                | y <sup>++</sup> | y <sup>*</sup> | y <sup>*++</sup> | y <sup>0</sup> | y <sup>0++</sup> | #         |
|----|------------------|-----------------|-----------------|------------------|----------------|------------------|----------|------------------|-----------------|----------------|------------------|----------------|------------------|-----------|
| 1  | 58.0287          | 29.5180         |                 |                  |                |                  | <b>G</b> |                  |                 |                |                  |                |                  | <b>19</b> |
| 2  | 159.0764         | 80.0418         |                 |                  | 141.0659       | 71.0366          | <b>T</b> | 1852.8164        | 926.9118        | 1835.7898      | 918.3986         | 1834.8058      | 917.9066         | <b>18</b> |
| 3  | 230.1135         | 115.5604        |                 |                  | 212.1030       | 106.5551         | <b>A</b> | 1751.7687        | 876.3880        | 1734.7422      | 867.8747         | 1733.7581      | 867.3827         | <b>17</b> |
| 4  | 287.1350         | 144.0711        |                 |                  | 269.1244       | 135.0659         | <b>G</b> | 1680.7316        | 840.8694        | 1663.7050      | 832.3562         | 1662.7210      | 831.8642         | <b>16</b> |
| 5  | 401.1779         | 201.0926        | 384.1514        | 192.5793         | 383.1674       | 192.0873         | <b>N</b> | 1623.7101        | 812.3587        | 1606.6836      | 803.8454         | 1605.6996      | 803.3534         | <b>15</b> |
| 6  | 472.2150         | 236.6112        | <b>455.1885</b> | 228.0979         | 454.2045       | 227.6059         | <b>A</b> | <b>1509.6672</b> | 755.3372        | 1492.6407      | 746.8240         | 1491.6566      | 746.3320         | <b>14</b> |
| 7  | 585.2991         | 293.1532        | 568.2726        | 284.6399         | 567.2885       | 284.1479         | <b>L</b> | <b>1438.6301</b> | <b>719.8187</b> | 1421.6035      | 711.3054         | 1420.6195      | 710.8134         | <b>13</b> |
| 8  | 732.3345         | 366.6709        | 715.3080        | 358.1576         | 714.3239       | 357.6656         | <b>M</b> | <b>1325.5460</b> | 663.2767        | 1308.5195      | 654.7634         | 1307.5355      | 654.2714         | <b>12</b> |
| 9  | 847.3614         | 424.1844        | 830.3349        | 415.6711         | 829.3509       | 415.1791         | <b>D</b> | <b>1178.5106</b> | 589.7590        | 1161.4841      | 581.2457         | 1160.5001      | 580.7537         | <b>11</b> |
| 10 | 904.3829         | 452.6951        | 887.3564        | 444.1818         | 886.3723       | 443.6898         | <b>G</b> | <b>1063.4837</b> | 532.2455        | 1046.4571      | 523.7322         | 1045.4731      | 523.2402         | <b>10</b> |
| 11 | 975.4200         | 488.2136        | 958.3935        | 479.7004         | 957.4095       | 479.2084         | <b>A</b> | 1006.4622        | 503.7347        | 989.4357       | 495.2215         | 988.4517       | 494.7295         | <b>9</b>  |
| 12 | 1062.4521        | 531.7297        | 1045.4255       | 523.2164         | 1044.4415      | 522.7244         | <b>S</b> | <b>935.4251</b>  | 468.2162        | 918.3986       | 459.7029         | 917.4145       | 459.2109         | <b>8</b>  |
| 13 | 1190.5106        | 595.7590        | 1173.4841       | 587.2457         | 1172.5001      | 586.7537         | <b>Q</b> | <b>848.3931</b>  | 424.7002        | 831.3665       | 416.1869         | 830.3825       | 415.6949         | <b>7</b>  |
| 14 | 1303.5947        | 652.3010        | 1286.5681       | 643.7877         | 1285.5841      | 643.2957         | <b>L</b> | <b>720.3345</b>  | 360.6709        | 703.3080       | 352.1576         | 702.3239       | 351.6656         | <b>6</b>  |
| 15 | 1434.6352        | 717.8212        | 1417.6086       | 709.3080         | 1416.6246      | 708.8159         | <b>M</b> | <b>607.2504</b>  | 304.1289        | 590.2239       | 295.6156         | 589.2399       | 295.1236         | <b>5</b>  |
| 16 | 1491.6566        | 746.3320        | 1474.6301       | 737.8187         | 1473.6461      | 737.3267         | <b>G</b> | <b>476.2100</b>  | 238.6086        | 459.1834       | 230.0953         | 458.1994       | 229.6033         | <b>4</b>  |
| 17 | <b>1620.6992</b> | 810.8533        | 1603.6727       | 802.3400         | 1602.6887      | 801.8480         | <b>E</b> | 419.1885         | 210.0979        | 402.1619       | 201.5846         | 401.1779       | 201.0926         | <b>3</b>  |
| 18 | <b>1735.7262</b> | 868.3667        | 1718.6996       | 859.8535         | 1717.7156      | 859.3614         | <b>N</b> | <b>290.1459</b>  | 145.5766        | 273.1193       | 137.0633         |                |                  | <b>2</b>  |
| 19 |                  |                 |                 |                  |                |                  | <b>R</b> | 175.1190         | 88.0631         | 158.0924       | 79.5498          |                |                  | <b>1</b>  |

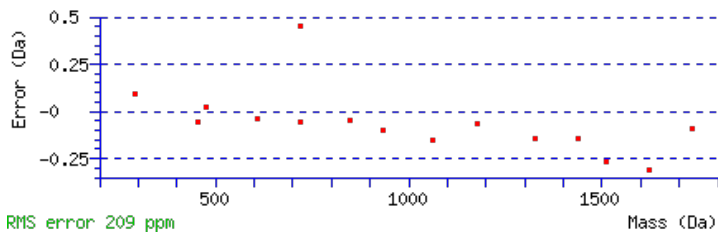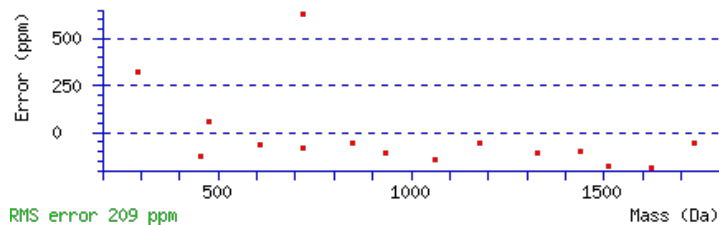

NCBI BLAST search of [GTAGNALMDGASQLMGENR](#)

(Parameters: blastp, nr protein database, expect=20000, no filter, PAM30)

Other BLAST [web gateways](#)

**All matches to this query**

| Score | Mr(calc)  | Delta   | Sequence                            | Site Analysis                         |
|-------|-----------|---------|-------------------------------------|---------------------------------------|
| 100.4 | 1908.8306 | 0.0083  | <a href="#">GTAGNALMDGASQLMGENR</a> | Deamidated N18, Oxidation M8; 100.00% |
| 40.5  | 1908.8306 | 0.0083  | <a href="#">GTAGNALMDGASQLMGENR</a> | Deamidated Q13, Oxidation M8; 0.00%   |
| 26.9  | 1908.8306 | 0.0083  | <a href="#">GTAGNALMDGASQLMGENR</a> | Deamidated N18, Oxidation M15; 0.00%  |
| 14.7  | 1908.8306 | 0.0083  | <a href="#">GTAGNALMDGASQLMGENR</a> | Deamidated Q13, Oxidation M15; 0.00%  |
| 6.8   | 1908.8306 | 0.0083  | <a href="#">GTAGNALMDGASQLMGENR</a> | Deamidated N5, Oxidation M8; 0.00%    |
| 6.2   | 1908.8411 | -0.0022 | <a href="#">ALANVFDDLEVMGNENR</a>   |                                       |
| 1.5   | 1908.8411 | -0.0023 | <a href="#">GKQSETMNLGSAPDWTGI</a>  |                                       |

Mascot: <http://www.matrixscience.com/>

# MATRIX SCIENCE Mascot Search Results

## Peptide View

MS/MS Fragmentation of **GTAGNALMDGASQLMGENR**

Found in **D6REL8** in **con\_Xuniprot\_HUMAN3**, D6REL8\_HUMAN Fibrinogen beta chain OS=Homo sapiens GN=FGB PE=2 SV=1

Match to Query 11732: 1925.812588 from(963.913570,2+) intensity(3139.1653) rtinseconds(1087) scans(2174) index(7575)

Title: 111019\_Est\_ISCardio\_NMI\_YP\_G\_12Spectrum1843\_scans\_\_2174

Data file C:\\mascot\\20140703\_Tmfg\_1D\\CSV\_UseAnalysis\\MasterCSV\\All\_Glyco\\mgf\\ptm\\UC18ERLIC\_PTM\_35D.mgf

Click mouse within plot area to zoom in by factor of two about that point

Or, to Da

Label all possible matches Label matches used for scoring

Show Y-axis

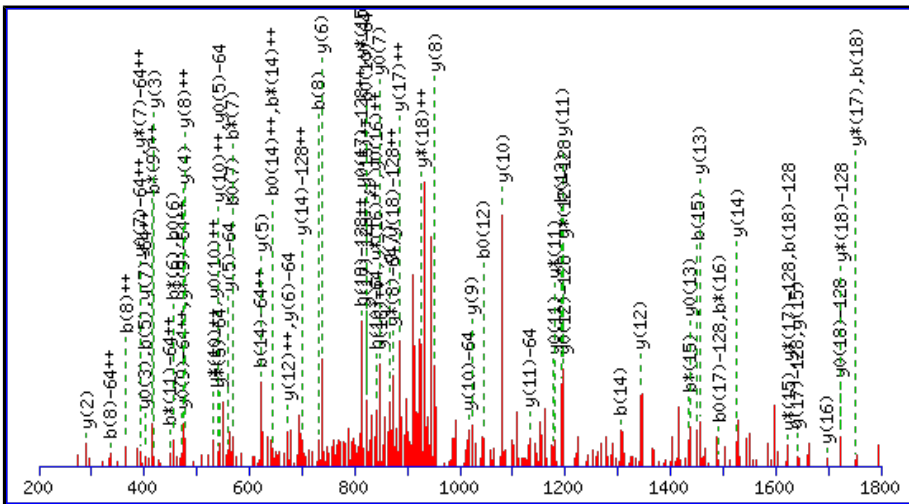

Monoisotopic mass of neutral peptide **Mr(calc):** 1925.8095

Fixed modifications: Carbamidomethyl (C) (apply to specified residues or termini only)

Variable modifications:

M8 : Oxidation (M), with neutral losses 0.0000(shown in table), 63.9983

Q13 : Deamidated (NQ)

M15 : Oxidation (M), with neutral losses 0.0000(shown in table), 63.9983

N18 : Deamidated (NQ)

Ions Score: 62 Expect: 3.2e-005

Matches : 86/352 fragment ions using 146 most intense peaks ([help](#))

| #  | b         | b <sup>++</sup> | b <sup>*</sup> | b <sup>*++</sup> | b <sup>0</sup> | b <sup>0++</sup> | Seq. | y         | y <sup>++</sup> | y <sup>*</sup> | y <sup>*++</sup> | y <sup>0</sup> | y <sup>0++</sup> | #  |
|----|-----------|-----------------|----------------|------------------|----------------|------------------|------|-----------|-----------------|----------------|------------------|----------------|------------------|----|
| 1  | 58.0287   | 29.5180         |                |                  |                |                  | G    |           |                 |                |                  |                |                  | 19 |
| 2  | 159.0764  | 80.0418         |                |                  | 141.0659       | 71.0366          | T    | 1869.7953 | 935.4013        | 1852.7688      | 926.8880         | 1851.7848      | 926.3960         | 18 |
| 3  | 230.1135  | 115.5604        |                |                  | 212.1030       | 106.5551         | A    | 1768.7476 | 884.8775        | 1751.7211      | 876.3642         | 1750.7371      | 875.8722         | 17 |
| 4  | 287.1350  | 144.0711        |                |                  | 269.1244       | 135.0659         | G    | 1697.7105 | 849.3589        | 1680.6840      | 840.8456         | 1679.7000      | 840.3536         | 16 |
| 5  | 401.1779  | 201.0926        | 384.1514       | 192.5793         | 383.1674       | 192.0873         | N    | 1640.6891 | 820.8482        | 1623.6625      | 812.3349         | 1622.6785      | 811.8429         | 15 |
| 6  | 472.2150  | 236.6112        | 455.1885       | 228.0979         | 454.2045       | 227.6059         | A    | 1526.6461 | 763.8267        | 1509.6196      | 755.3134         | 1508.6356      | 754.8214         | 14 |
| 7  | 585.2991  | 293.1532        | 568.2726       | 284.6399         | 567.2885       | 284.1479         | L    | 1455.6090 | 728.3081        | 1438.5825      | 719.7949         | 1437.5985      | 719.3029         | 13 |
| 8  | 732.3345  | 366.6709        | 715.3080       | 358.1576         | 714.3239       | 357.6656         | M    | 1342.5250 | 671.7661        | 1325.4984      | 663.2528         | 1324.5144      | 662.7608         | 12 |
| 9  | 847.3614  | 424.1844        | 830.3349       | 415.6711         | 829.3509       | 415.1791         | D    | 1195.4896 | 598.2484        | 1178.4630      | 589.7351         | 1177.4790      | 589.2431         | 11 |
| 10 | 904.3829  | 452.6951        | 887.3564       | 444.1818         | 886.3723       | 443.6898         | G    | 1080.4626 | 540.7349        | 1063.4361      | 532.2217         | 1062.4521      | 531.7297         | 10 |
| 11 | 975.4200  | 488.2136        | 958.3935       | 479.7004         | 957.4095       | 479.2084         | A    | 1023.4412 | 512.2242        | 1006.4146      | 503.7109         | 1005.4306      | 503.2189         | 9  |
| 12 | 1062.4521 | 531.7297        | 1045.4255      | 523.2164         | 1044.4415      | 522.7244         | S    | 952.4040  | 476.7057        | 935.3775       | 468.1924         | 934.3935       | 467.7004         | 8  |
| 13 | 1191.4946 | 596.2510        | 1174.4681      | 587.7377         | 1173.4841      | 587.2457         | Q    | 865.3720  | 433.1896        | 848.3455       | 424.6764         | 847.3614       | 424.1844         | 7  |
| 14 | 1304.5787 | 652.7930        | 1287.5522      | 644.2797         | 1286.5681      | 643.7877         | L    | 736.3294  | 368.6683        | 719.3029       | 360.1551         | 718.3189       | 359.6631         | 6  |
| 15 | 1451.6141 | 726.3107        | 1434.5876      | 717.7974         | 1433.6035      | 717.3054         | M    | 623.2454  | 312.1263        | 606.2188       | 303.6130         | 605.2348       | 303.1210         | 5  |
| 16 | 1508.6356 | 754.8214        | 1491.6090      | 746.3082         | 1490.6250      | 745.8161         | G    | 476.2100  | 238.6086        | 459.1834       | 230.0953         | 458.1994       | 229.6033         | 4  |
| 17 | 1637.6782 | 819.3427        | 1620.6516      | 810.8294         | 1619.6676      | 810.3374         | E    | 419.1885  | 210.0979        | 402.1619       | 201.5846         | 401.1779       | 201.0926         | 3  |
| 18 | 1752.7051 | 876.8562        | 1735.6786      | 868.3429         | 1734.6945      | 867.8509         | N    | 290.1459  | 145.5766        | 273.1193       | 137.0633         |                |                  | 2  |

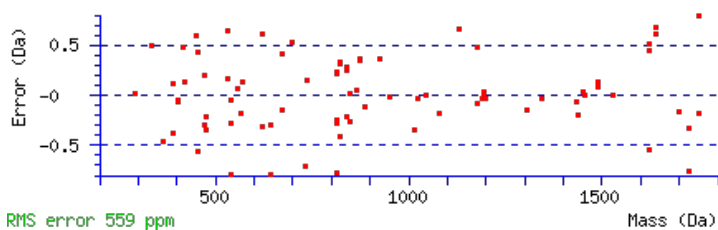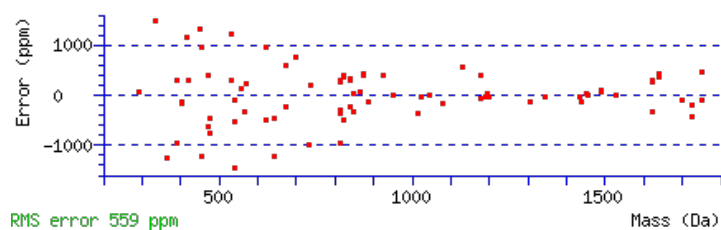

NCBI BLAST search of [GTAGNALMDGASQLMGENR](#)

(Parameters: blastp, nr protein database, expect=20000, no filter, PAM30)

Other BLAST [web gateways](#)

**All matches to this query**

| Score | Mr(calc)  | Delta  | Sequence                            | Site Analysis               |
|-------|-----------|--------|-------------------------------------|-----------------------------|
| 62.2  | 1925.8095 | 0.0031 | <a href="#">GTAGNALMDGASQLMGENR</a> | Deamidated Q13, N18 100.00% |
| 11.3  | 1925.8095 | 0.0031 | <a href="#">GTAGNALMDGASQLMGENR</a> | Deamidated N5, N18 0.00%    |

Mascot: <http://www.matrixscience.com/>



# MATRIX SCIENCE Mascot Search Results

## Peptide View

MS/MS Fragmentation of **YRGTAGNALMDGASQLMGENR**

Found in **D6REL8** in **con\_Xuniprot\_HUMAN3**, D6REL8\_HUMAN Fibrinogen beta chain OS=Homo sapiens GN=FGB PE=2 SV=1

Match to Query 14868: 2212.004622 from(738.342150,3+) intensity(109300.4766) rtinseconds(1577) scans(4010) index(2699)

Title: 111019\_Est\_ISCardio\_NMI\_YP\_G\_5Spectrum3389\_scans\_\_4010

Data file C:\mascot\20140703\_Tmgf\_1D\CSV\_UseAnalysis\MasterCSV\All\_Glyco\mgf\ptm\UC18ERLIC\_PTM\_35D.mgf

Click mouse within plot area to zoom in by factor of two about that point

Or, to Da

Label all possible matches Label matches used for scoring

Show Y-axis

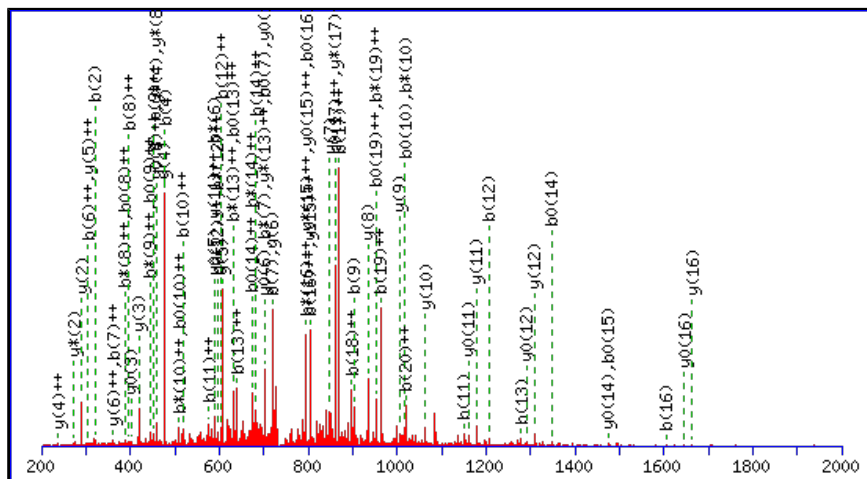

Monoisotopic mass of neutral peptide Mr(calc): 2212.0001

Fixed modifications: Carbamidomethyl (C) (apply to specified residues or termini only)

Variable modifications:

N20 : Deamidated (NQ)

Ions Score: 62 Expect: 0.00012

Matches : 82/228 fragment ions using 129 most intense peaks ([help](#))

| #  | b                | b <sup>++</sup>  | b <sup>*</sup>  | b <sup>*++</sup> | b <sup>0</sup>   | b <sup>0++</sup> | Seq. | y                | y <sup>++</sup> | y <sup>*</sup>  | y <sup>*++</sup> | y <sup>0</sup>   | y <sup>0++</sup> | #  |
|----|------------------|------------------|-----------------|------------------|------------------|------------------|------|------------------|-----------------|-----------------|------------------|------------------|------------------|----|
| 1  | 164.0706         | 82.5389          |                 |                  |                  |                  | Y    |                  |                 |                 |                  |                  |                  | 21 |
| 2  | <b>320.1717</b>  | 160.5895         | 303.1452        | 152.0762         |                  |                  | R    | 2049.9440        | 1025.4757       | 2032.9175       | 1016.9624        | 2031.9335        | 1016.4704        | 20 |
| 3  | 377.1932         | 189.1002         | 360.1666        | 180.5870         |                  |                  | G    | 1893.8429        | 947.4251        | 1876.8164       | 938.9118         | 1875.8324        | 938.4198         | 19 |
| 4  | <b>478.2409</b>  | 239.6241         | 461.2143        | 231.1108         | 460.2303         | 230.6188         | T    | 1836.8215        | 918.9144        | 1819.7949       | 910.4011         | 1818.8109        | 909.9091         | 18 |
| 5  | 549.2780         | 275.1426         | 532.2514        | 266.6294         | 531.2674         | 266.1373         | A    | 1735.7738        | 868.3905        | 1718.7472       | <b>859.8773</b>  | 1717.7632        | 859.3853         | 17 |
| 6  | 606.2994         | <b>303.6534</b>  | <b>589.2729</b> | 295.1401         | 588.2889         | 294.6481         | G    | <b>1664.7367</b> | 832.8720        | 1647.7101       | 824.3587         | <b>1646.7261</b> | 823.8667         | 16 |
| 7  | <b>720.3424</b>  | <b>360.6748</b>  | <b>703.3158</b> | 352.1615         | <b>702.3318</b>  | 351.6695         | N    | 1607.7152        | <b>804.3612</b> | 1590.6887       | <b>795.8480</b>  | 1589.7047        | <b>795.3560</b>  | 15 |
| 8  | 791.3795         | <b>396.1934</b>  | 774.3529        | <b>387.6801</b>  | 773.3689         | <b>387.1881</b>  | A    | 1493.6723        | 747.3398        | 1476.6457       | 738.8265         | <b>1475.6617</b> | 738.3345         | 14 |
| 9  | <b>904.4635</b>  | <b>452.7354</b>  | 887.4370        | <b>444.2221</b>  | 886.4530         | <b>443.7301</b>  | L    | 1422.6352        | 711.8212        | 1405.6086       | <b>703.3080</b>  | 1404.6246        | <b>702.8159</b>  | 13 |
| 10 | 1035.5040        | <b>518.2557</b>  | 1018.4775       | <b>509.7424</b>  | <b>1017.4935</b> | <b>509.2504</b>  | M    | <b>1309.5511</b> | 655.2792        | 1292.5246       | 646.7659         | <b>1291.5405</b> | 646.2739         | 12 |
| 11 | <b>1150.5310</b> | <b>575.7691</b>  | 1133.5044       | 567.2558         | 1132.5204        | 566.7638         | D    | <b>1178.5106</b> | <b>589.7590</b> | 1161.4841       | 581.2457         | <b>1160.5001</b> | 580.7537         | 11 |
| 12 | <b>1207.5524</b> | <b>604.2799</b>  | 1190.5259       | <b>595.7666</b>  | 1189.5419        | <b>595.2746</b>  | G    | <b>1063.4837</b> | 532.2455        | 1046.4571       | 523.7322         | 1045.4731        | 523.2402         | 10 |
| 13 | <b>1278.5895</b> | <b>639.7984</b>  | 1261.5630       | <b>631.2851</b>  | 1260.5790        | <b>630.7931</b>  | A    | <b>1006.4622</b> | 503.7347        | 989.4357        | 495.2215         | 988.4517         | 494.7295         | 9  |
| 14 | 1365.6216        | <b>683.3144</b>  | 1348.5950       | <b>674.8012</b>  | <b>1347.6110</b> | <b>674.3091</b>  | S    | <b>935.4251</b>  | 468.2162        | 918.3986        | <b>459.7029</b>  | 917.4145         | <b>459.2109</b>  | 8  |
| 15 | 1493.6802        | 747.3437         | 1476.6536       | 738.8304         | <b>1475.6696</b> | 738.3384         | Q    | <b>848.3931</b>  | 424.7002        | 831.3665        | 416.1869         | 830.3825         | 415.6949         | 7  |
| 16 | <b>1606.7642</b> | <b>803.8857</b>  | 1589.7377       | <b>795.3725</b>  | 1588.7537        | <b>794.8805</b>  | L    | <b>720.3345</b>  | <b>360.6709</b> | <b>703.3080</b> | 352.1576         | <b>702.3239</b>  | 351.6656         | 6  |
| 17 | 1737.8047        | <b>869.4060</b>  | 1720.7782       | <b>860.8927</b>  | 1719.7941        | <b>860.4007</b>  | M    | <b>607.2504</b>  | <b>304.1289</b> | 590.2239        | 295.6156         | <b>589.2399</b>  | 295.1236         | 5  |
| 18 | 1794.8262        | <b>897.9167</b>  | 1777.7996       | 889.4034         | 1776.8156        | 888.9114         | G    | <b>476.2100</b>  | <b>238.6086</b> | <b>459.1834</b> | 230.0953         | <b>458.1994</b>  | 229.6033         | 4  |
| 19 | 1923.8688        | <b>962.4380</b>  | 1906.8422       | <b>953.9247</b>  | 1905.8582        | <b>953.4327</b>  | E    | <b>419.1885</b>  | 210.0979        | 402.1619        | 201.5846         | <b>401.1779</b>  | 201.0926         | 3  |
| 20 | 2038.8957        | <b>1019.9515</b> | 2021.8692       | 1011.4382        | 2020.8851        | 1010.9462        | N    | <b>290.1459</b>  | 145.5766        | <b>273.1193</b> | 137.0633         |                  |                  | 2  |
| 21 |                  |                  |                 |                  |                  |                  | R    | 175.1190         | 88.0631         | 158.0924        | 79.5498          |                  |                  | 1  |

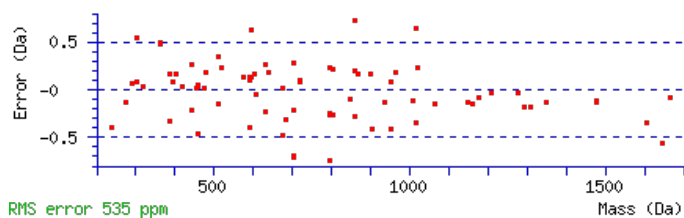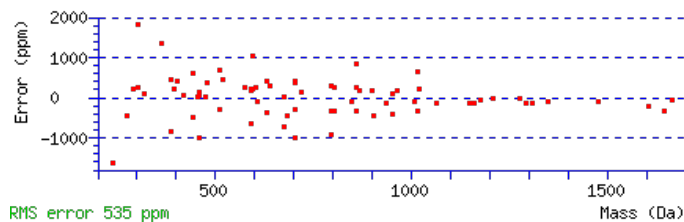

NCBI BLAST search of [YRGTAGNALMDGASQLMGENR](#)

(Parameters: blastp, nr protein database, expect=20000, no filter, PAM30)

Other BLAST [web gateways](#)

**All matches to this query**

| Score | Mr(calc)  | Delta   | Sequence                              | Site Analysis         |
|-------|-----------|---------|---------------------------------------|-----------------------|
| 61.6  | 2212.0001 | 0.0046  | <a href="#">YRGTAGNALMDGASQLMGENR</a> | Deamidated N20 58.08% |
| 60.2  | 2212.0001 | 0.0046  | <a href="#">YRGTAGNALMDGASQLMGENR</a> | Deamidated Q15 41.78% |
| 35.5  | 2212.0001 | 0.0046  | <a href="#">YRGTAGNALMDGASQLMGENR</a> | Deamidated N7 0.14%   |
| 14.2  | 2210.9945 | 1.0101  | <a href="#">VKSMQMFHMPITSAMQGDR</a>   |                       |
| 13.3  | 2212.0140 | -0.0094 | <a href="#">TFNLMPNLDDVVRDSMGQK</a>   |                       |
| 12.9  | 2210.9945 | 1.0101  | <a href="#">VKSMQMFHMPITSAMQGDR</a>   |                       |
| 11.4  | 2212.0140 | -0.0094 | <a href="#">VMDVFQVAIEEGCRSQA EK</a>  |                       |
| 9.9   | 2210.9945 | 1.0101  | <a href="#">VKSMQMFHMPITSAMQGDR</a>   |                       |
| 8.9   | 2212.0140 | -0.0094 | <a href="#">TFNLMPNLDDVVRDSMGQK</a>   |                       |
| 8.0   | 2210.9945 | 1.0101  | <a href="#">VKSMQMFHMPITSAMQGDR</a>   |                       |

Mascot: <http://www.matrixscience.com/>

# MASCOT SCIENCE Mascot Search Results

## Peptide View

MS/MS Fragmentation of **YRGTAGNALMDGASQLMGENR**

Found in **D6REL8** in **con\_Xuniprot\_HUMAN3**, D6REL8\_HUMAN Fibrinogen beta chain OS=Homo sapiens GN=FGB PE=2 SV=1

Match to Query 14996: 2243.994402 from(749.005410,3+) intensity(273908.9063) rtinseconds(767) scans(1704) index(2513)

Title: 111019\_Est\_ISCardio\_NMI\_YP\_G\_5Spectrum1441\_scans\_\_1704

Data file C:\mascot\20140703\_Tmgf\_1D\CSV\_UseAnalysis\MasterCSV\All\_Glyco\mgf\ptm\UC18ERLIC\_PTM\_35D.mgf

Click mouse within plot area to zoom in by factor of two about that point

Or, to Da

Label all possible matches Label matches used for scoring

Show Y-axis

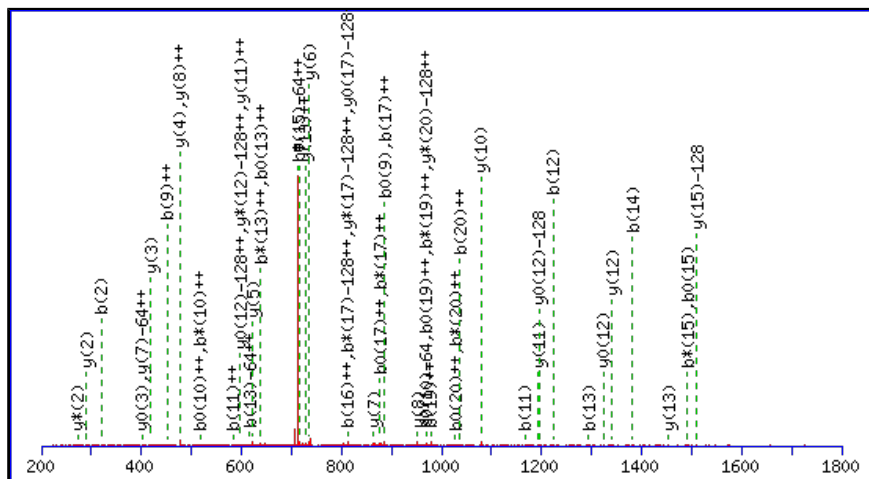

Monoisotopic mass of neutral peptide Mr(calc): 2243.9899

Fixed modifications: Carbamidomethyl (C) (apply to specified residues or termini only)

Variable modifications:

M10 : Oxidation (M), with neutral losses 0.0000 (shown in table), 63.9983

M17 : Oxidation (M), with neutral losses 0.0000 (shown in table), 63.9983

N20 : Deamidated (NQ)

Ions Score: 58 Expect: 0.00022

Matches : 57/390 fragment ions using 58 most intense peaks ([help](#))

| #  | b                | b <sup>++</sup>  | b <sup>*</sup>   | b <sup>*++</sup> | b <sup>0</sup>   | b <sup>0++</sup> | Seq. | y                | y <sup>++</sup> | y <sup>*</sup>  | y <sup>*++</sup> | y <sup>0</sup>   | y <sup>0++</sup> | #  |
|----|------------------|------------------|------------------|------------------|------------------|------------------|------|------------------|-----------------|-----------------|------------------|------------------|------------------|----|
| 1  | 164.0706         | 82.5389          |                  |                  |                  |                  | Y    |                  |                 |                 |                  |                  |                  | 21 |
| 2  | <b>320.1717</b>  | 160.5895         | 303.1452         | 152.0762         |                  |                  | R    | 2081.9339        | 1041.4706       | 2064.9073       | 1032.9573        | 2063.9233        | 1032.4653        | 20 |
| 3  | 377.1932         | 189.1002         | 360.1666         | 180.5870         |                  |                  | G    | 1925.8328        | 963.4200        | 1908.8062       | 954.9067         | 1907.8222        | 954.4147         | 19 |
| 4  | 478.2409         | 239.6241         | 461.2143         | 231.1108         | 460.2303         | 230.6188         | T    | 1868.8113        | 934.9093        | 1851.7848       | 926.3960         | 1850.8007        | 925.9040         | 18 |
| 5  | 549.2780         | 275.1426         | 532.2514         | 266.6294         | 531.2674         | 266.1373         | A    | 1767.7636        | 884.3855        | 1750.7371       | 875.8722         | 1749.7531        | 875.3802         | 17 |
| 6  | 606.2994         | 303.6534         | 589.2729         | 295.1401         | 588.2889         | 294.6481         | G    | 1696.7265        | 848.8669        | 1679.7000       | 840.3536         | 1678.7159        | 839.8616         | 16 |
| 7  | 720.3424         | 360.6748         | 703.3158         | 352.1615         | 702.3318         | 351.6695         | N    | 1639.7050        | 820.3562        | 1622.6785       | <b>811.8429</b>  | 1621.6945        | <b>811.3509</b>  | 15 |
| 8  | 791.3795         | 396.1934         | 774.3529         | 387.6801         | 773.3689         | 387.1881         | A    | 1525.6621        | 763.3347        | 1508.6356       | 754.8214         | 1507.6516        | 754.3294         | 14 |
| 9  | 904.4635         | <b>452.7354</b>  | 887.4370         | 444.2221         | <b>886.4530</b>  | 443.7301         | L    | <b>1454.6250</b> | <b>727.8161</b> | 1437.5985       | 719.3029         | 1436.6144        | 718.8109         | 13 |
| 10 | 1051.4989        | 526.2531         | 1034.4724        | <b>517.7398</b>  | 1033.4884        | <b>517.2478</b>  | M    | <b>1341.5409</b> | 671.2741        | 1324.5144       | 662.7608         | <b>1323.5304</b> | 662.2688         | 12 |
| 11 | <b>1166.5259</b> | <b>583.7666</b>  | 1149.4993        | 575.2533         | 1148.5153        | 574.7613         | D    | <b>1194.5055</b> | <b>597.7564</b> | 1177.4790       | 589.2431         | 1176.4950        | 588.7511         | 11 |
| 12 | <b>1223.5473</b> | 612.2773         | 1206.5208        | 603.7640         | 1205.5368        | 603.2720         | G    | <b>1079.4786</b> | 540.2429        | 1062.4521       | 531.7297         | 1061.4680        | 531.2377         | 10 |
| 13 | <b>1294.5845</b> | 647.7959         | 1277.5579        | <b>639.2826</b>  | 1276.5739        | <b>638.7906</b>  | A    | 1022.4571        | 511.7322        | 1005.4306       | 503.2189         | 1004.4466        | 502.7269         | 9  |
| 14 | <b>1381.6165</b> | 691.3119         | 1364.5899        | 682.7986         | 1363.6059        | 682.3066         | S    | <b>951.4200</b>  | <b>476.2136</b> | 934.3935        | 467.7004         | 933.4095         | 467.2084         | 8  |
| 15 | 1509.6751        | 755.3412         | <b>1492.6485</b> | 746.8279         | <b>1491.6645</b> | 746.3359         | Q    | <b>864.3880</b>  | 432.6976        | 847.3614        | 424.1844         | 846.3774         | 423.6924         | 7  |
| 16 | 1622.7591        | <b>811.8832</b>  | 1605.7326        | 803.3699         | 1604.7486        | 802.8779         | L    | <b>736.3294</b>  | 368.6683        | 719.3029        | 360.1551         | 718.3189         | 359.6631         | 6  |
| 17 | 1769.7945        | <b>885.4009</b>  | 1752.7680        | <b>876.8876</b>  | 1751.7840        | <b>876.3956</b>  | M    | <b>623.2454</b>  | 312.1263        | 606.2188        | 303.6130         | 605.2348         | 303.1210         | 5  |
| 18 | 1826.8160        | 913.9116         | 1809.7894        | 905.3984         | 1808.8054        | 904.9064         | G    | <b>476.2100</b>  | 238.6086        | 459.1834        | 230.0953         | 458.1994         | 229.6033         | 4  |
| 19 | 1955.8586        | <b>978.4329</b>  | 1938.8320        | <b>969.9197</b>  | 1937.8480        | <b>969.4277</b>  | E    | <b>419.1885</b>  | 210.0979        | 402.1619        | 201.5846         | <b>401.1779</b>  | 201.0926         | 3  |
| 20 | 2070.8855        | <b>1035.9464</b> | 2053.8590        | <b>1027.4331</b> | 2052.8750        | <b>1026.9411</b> | N    | <b>290.1459</b>  | 145.5766        | <b>273.1193</b> | 137.0633         |                  |                  | 2  |
| 21 |                  |                  |                  |                  |                  |                  | R    | 175.1190         | 88.0631         | 158.0924        | 79.5498          |                  |                  | 1  |

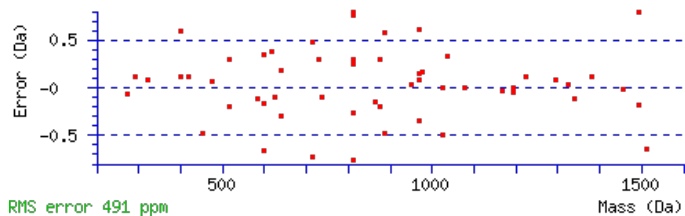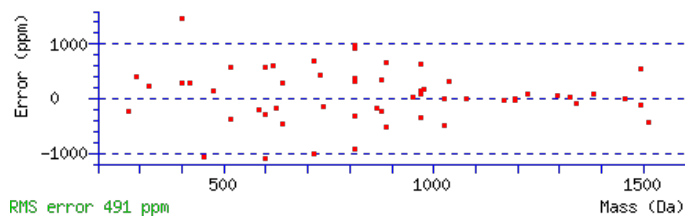

NCBI BLAST search of [YRGTAGNALMDGASQLMGENR](#)

(Parameters: blastp, nr protein database, expect=20000, no filter, PAM30)

Other BLAST [web gateways](#)

All matches to this query

| Score | Mr(calc)  | Delta   | Sequence                              | Site Analysis         |
|-------|-----------|---------|---------------------------------------|-----------------------|
| 58.0  | 2243.9899 | 0.0045  | <a href="#">YRGTAGNALMDGASQLMGENR</a> | Deamidated N20 97.24% |
| 42.4  | 2243.9899 | 0.0045  | <a href="#">YRGTAGNALMDGASQLMGENR</a> | Deamidated Q15 2.71%  |
| 25.5  | 2243.9899 | 0.0045  | <a href="#">YRGTAGNALMDGASQLMGENR</a> | Deamidated N7 0.06%   |
| 6.1   | 2242.9987 | 0.9957  | <a href="#">HACYGVSVLNSYNELMVDR</a>   |                       |
| 5.7   | 2242.9915 | 1.0029  | <a href="#">DFMLMADDVKGQEFYQK</a>     |                       |
| 5.5   | 2244.0038 | -0.0094 | <a href="#">GPMSPPPNQSSIQVKMSGNR</a>  |                       |
| 5.5   | 2244.0005 | -0.0061 | <a href="#">SDQLQQAVQSQGFINYCQK</a>   |                       |
| 5.5   | 2244.0005 | -0.0061 | <a href="#">SDQLQQAVQSQGFINYCQK</a>   |                       |
| 5.5   | 2244.0005 | -0.0061 | <a href="#">SDQLQQAVQSQGFINYCQK</a>   |                       |
| 5.4   | 2244.0045 | -0.0101 | <a href="#">DPDAYKFIESNAGQLGDPCK</a>  |                       |

Mascot: <http://www.matrixscience.com/>

# MATRIX SCIENCE Mascot Search Results

## Peptide View

MS/MS Fragmentation of **RNPPMGGNVVFEDTVITNQEEPYNHSGR**

Found in **P02745** in **con\_Xuniprot\_HUMAN3**, C1QA\_HUMAN Complement C1q subcomponent subunit A OS=Homo sapiens GN=C1QA PE=1 SV=2

Match to Query 27412: 3285.552296 from(822.395350,4+) intensity(78405.9766) rtinseconds(1329) scans(3286) index(1254)

Title: 111019\_Est\_ISCardio\_NMI\_YP\_G\_3Spectrum2842\_scans\_3286

Data file C:\mascot\20140703\_Tmgf\_1D\CSV\_UseAnalysis\MasterCSV\All\_Glyco\mgf\ptm\UC18ERLIC\_PTM\_35D.mgf

Click mouse within plot area to zoom in by factor of two about that point

Or, to Da

Label all possible matches Label matches used for scoring

Show Y-axis

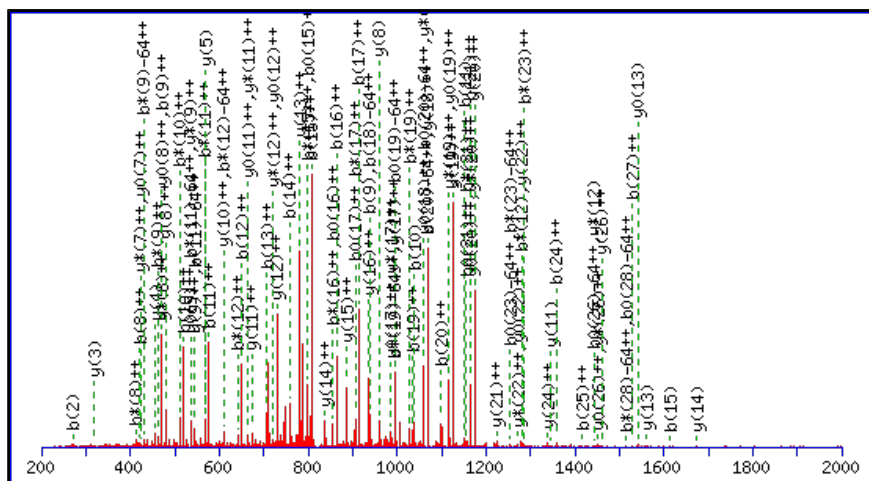

Monoisotopic mass of neutral peptide Mr(calc): 3285.5473

Fixed modifications: Carbamidomethyl (C) (apply to specified residues or termini only)

Variable modifications:

M5 : Oxidation (M), with neutral losses 0.0000 (shown in table), 63.9983

N25 : Deamidated (NQ)

Ions Score: 80 Expect: 2.7e-006

Matches : 100/460 fragment ions using 152 most intense peaks (help)

| #  | b                | b <sup>++</sup>  | b <sup>*</sup>   | b <sup>*++</sup> | b <sup>0</sup> | b <sup>0++</sup> | Seq. | y                | y <sup>++</sup>  | y <sup>*</sup>   | y <sup>*++</sup> | y <sup>0</sup>   | y <sup>0++</sup> | #  |
|----|------------------|------------------|------------------|------------------|----------------|------------------|------|------------------|------------------|------------------|------------------|------------------|------------------|----|
| 1  | 157.1084         | 79.0578          | 140.0818         | 70.5446          |                |                  | R    |                  |                  |                  |                  |                  |                  | 29 |
| 2  | <b>271.1513</b>  | 136.0793         | 254.1248         | 127.5660         |                |                  | N    | 3130.4535        | 1565.7304        | 3113.4269        | 1557.2171        | 3112.4429        | 1556.7251        | 28 |
| 3  | 368.2041         | 184.6057         | 351.1775         | 176.0924         |                |                  | P    | 3016.4105        | 1508.7089        | 2999.3840        | 1500.1956        | 2998.4000        | 1499.7036        | 27 |
| 4  | 465.2568         | 233.1321         | 448.2303         | 224.6188         |                |                  | P    | 2919.3578        | <b>1460.1825</b> | 2902.3312        | <b>1451.6692</b> | 2901.3472        | <b>1451.1772</b> | 26 |
| 5  | 612.2922         | 306.6498         | 595.2657         | 298.1365         |                |                  | M    | 2822.3050        | 1411.6561        | 2805.2785        | 1403.1429        | 2804.2944        | 1402.6509        | 25 |
| 6  | 669.3137         | 335.1605         | 652.2872         | 326.6472         |                |                  | G    | 2675.2696        | <b>1338.1384</b> | 2658.2431        | 1329.6252        | 2657.2590        | 1329.1332        | 24 |
| 7  | 726.3352         | 363.6712         | 709.3086         | 355.1579         |                |                  | G    | 2618.2481        | 1309.6277        | 2601.2216        | 1301.1144        | 2600.2376        | 1300.6224        | 23 |
| 8  | 840.3781         | <b>420.6927</b>  | 823.3515         | <b>412.1794</b>  |                |                  | N    | 2561.2267        | <b>1281.1170</b> | 2544.2001        | <b>1272.6037</b> | 2543.2161        | <b>1272.1117</b> | 22 |
| 9  | <b>939.4465</b>  | <b>470.2269</b>  | 922.4200         | <b>461.7136</b>  |                |                  | V    | 2447.1837        | <b>1224.0955</b> | 2430.1572        | 1215.5822        | 2429.1732        | 1215.0902        | 21 |
| 10 | <b>1038.5149</b> | <b>519.7611</b>  | 1021.4884        | <b>511.2478</b>  |                |                  | V    | 2348.1153        | <b>1174.5613</b> | 2331.0888        | <b>1166.0480</b> | 2330.1048        | <b>1165.5560</b> | 20 |
| 11 | <b>1151.5990</b> | <b>576.3031</b>  | 1134.5724        | <b>567.7899</b>  |                |                  | I    | 2249.0469        | <b>1125.0271</b> | 2232.0204        | <b>1116.5138</b> | 2231.0364        | <b>1116.0218</b> | 19 |
| 12 | 1298.6674        | <b>649.8373</b>  | <b>1281.6409</b> | <b>641.3241</b>  |                |                  | F    | 2135.9629        | <b>1068.4851</b> | 2118.9363        | <b>1059.9718</b> | 2117.9523        | <b>1059.4798</b> | 18 |
| 13 | 1413.6943        | <b>707.3508</b>  | 1396.6678        | 698.8375         | 1395.6838      | 698.3455         | D    | 1988.8944        | <b>994.9509</b>  | 1971.8679        | <b>986.4376</b>  | 1970.8839        | <b>985.9456</b>  | 17 |
| 14 | 1514.7420        | <b>757.8747</b>  | 1497.7155        | 749.3614         | 1496.7315      | 748.8694         | T    | 1873.8675        | <b>937.4374</b>  | 1856.8409        | 928.9241         | 1855.8569        | 928.4321         | 16 |
| 15 | <b>1613.8104</b> | <b>807.4089</b>  | 1596.7839        | <b>798.8956</b>  | 1595.7999      | <b>798.4036</b>  | V    | 1772.8198        | <b>886.9135</b>  | 1755.7933        | 878.4003         | 1754.8093        | 877.9083         | 15 |
| 16 | 1726.8945        | <b>863.9509</b>  | 1709.8680        | <b>855.4376</b>  | 1708.8839      | <b>854.9456</b>  | I    | <b>1673.7514</b> | <b>837.3793</b>  | 1656.7249        | 828.8661         | 1655.7408        | 828.3741         | 14 |
| 17 | 1827.9422        | <b>914.4747</b>  | 1810.9156        | <b>905.9615</b>  | 1809.9316      | <b>905.4694</b>  | T    | <b>1560.6673</b> | <b>780.8373</b>  | 1543.6408        | 772.3240         | <b>1542.6568</b> | 771.8320         | 13 |
| 18 | 1941.9851        | 971.4962         | 1924.9586        | 962.9829         | 1923.9745      | 962.4909         | N    | 1459.6197        | <b>730.3135</b>  | <b>1442.5931</b> | <b>721.8002</b>  | 1441.6091        | <b>721.3082</b>  | 12 |
| 19 | 2070.0437        | <b>1035.5255</b> | 2053.0171        | <b>1027.0122</b> | 2052.0331      | 1026.5202        | Q    | <b>1345.5767</b> | <b>673.2920</b>  | 1328.5502        | <b>664.7787</b>  | 1327.5662        | <b>664.2867</b>  | 11 |
| 20 | 2199.0863        | <b>1100.0468</b> | 2182.0597        | 1091.5335        | 2181.0757      | 1091.0415        | E    | 1217.5182        | <b>609.2627</b>  | 1200.4916        | 600.7494         | 1199.5076        | 600.2574         | 10 |
| 21 | 2328.1289        | <b>1164.5681</b> | 2311.1023        | <b>1156.0548</b> | 2310.1183      | <b>1155.5628</b> | E    | 1088.4756        | <b>544.7414</b>  | 1071.4490        | <b>536.2281</b>  | 1070.4650        | <b>535.7361</b>  | 9  |

|    |           |           |           |           |           |           |   |          |          |          |          |          |          |   |
|----|-----------|-----------|-----------|-----------|-----------|-----------|---|----------|----------|----------|----------|----------|----------|---|
| 22 | 2425.1816 | 1213.0945 | 2408.1551 | 1204.5812 | 2407.1711 | 1204.0892 | P | 959.4330 | 480.2201 | 942.4064 | 471.7068 | 941.4224 | 471.2148 | 8 |
| 23 | 2588.2450 | 1294.6261 | 2571.2184 | 1286.1128 | 2570.2344 | 1285.6208 | Y | 862.3802 | 431.6937 | 845.3537 | 423.1805 | 844.3696 | 422.6885 | 7 |
| 24 | 2716.3035 | 1358.6554 | 2699.2770 | 1350.1421 | 2698.2930 | 1349.6501 | Q | 699.3169 | 350.1621 | 682.2903 | 341.6488 | 681.3063 | 341.1568 | 6 |
| 25 | 2831.3305 | 1416.1689 | 2814.3039 | 1407.6556 | 2813.3199 | 1407.1636 | N | 571.2583 | 286.1328 | 554.2317 | 277.6195 | 553.2477 | 277.1275 | 5 |
| 26 | 2968.3894 | 1484.6983 | 2951.3629 | 1476.1851 | 2950.3788 | 1475.6931 | H | 456.2314 | 228.6193 | 439.2048 | 220.1060 | 438.2208 | 219.6140 | 4 |
| 27 | 3055.4214 | 1528.2144 | 3038.3949 | 1519.7011 | 3037.4109 | 1519.2091 | S | 319.1724 | 160.0899 | 302.1459 | 151.5766 | 301.1619 | 151.0846 | 3 |
| 28 | 3112.4429 | 1556.7251 | 3095.4163 | 1548.2118 | 3094.4323 | 1547.7198 | G | 232.1404 | 116.5738 | 215.1139 | 108.0606 |          |          | 2 |
| 29 |           |           |           |           |           |           | R | 175.1190 | 88.0631  | 158.0924 | 79.5498  |          |          | 1 |

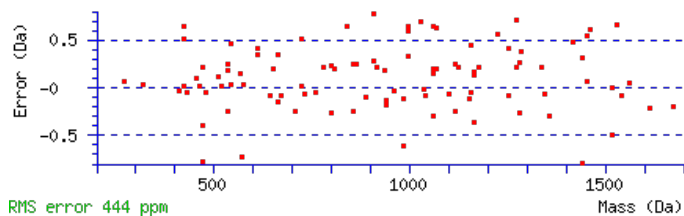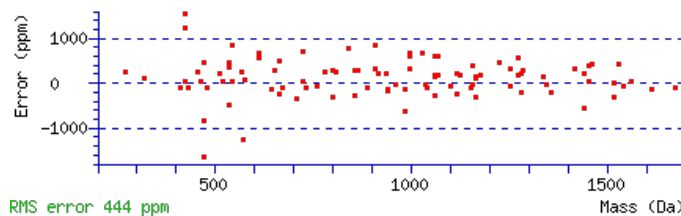

NCBI BLAST search of [RNPPMGGNVVIFDTVITNQEEPYNHSGR](#)  
 (Parameters: blastp, nr protein database, expect=20000, no filter, PAM30)  
 Other BLAST [web gateways](#)

All matches to this query

| Score | Mr(calc)  | Delta  | Sequence                                     | Site Analysis         |
|-------|-----------|--------|----------------------------------------------|-----------------------|
| 79.7  | 3285.5473 | 0.0050 | <a href="#">RNPPMGGNVVIFDTVITNQEEPYNHSGR</a> | Deamidated N25 31.14% |
| 79.7  | 3285.5473 | 0.0050 | <a href="#">RNPPMGGNVVIFDTVITNQEEPYNHSGR</a> | Deamidated Q24 31.14% |
| 77.9  | 3285.5473 | 0.0050 | <a href="#">RNPPMGGNVVIFDTVITNQEEPYNHSGR</a> | Deamidated Q19 20.20% |
| 77.1  | 3285.5473 | 0.0050 | <a href="#">RNPPMGGNVVIFDTVITNQEEPYNHSGR</a> | Deamidated N18 16.92% |
| 60.8  | 3285.5473 | 0.0050 | <a href="#">RNPPMGGNVVIFDTVITNQEEPYNHSGR</a> | Deamidated N8 0.39%   |
| 57.9  | 3285.5473 | 0.0050 | <a href="#">RNPPMGGNVVIFDTVITNQEEPYNHSGR</a> | Deamidated N2 0.21%   |
| 56.4  | 3284.5633 | 0.9890 | <a href="#">RNPPMGGNVVIFDTVITNQEEPYNHSGR</a> |                       |
| 9.8   | 3284.5475 | 1.0048 | <a href="#">YSSQLAQMOCMITNVEAQLAEIRADLER</a> |                       |
| 9.2   | 3284.5475 | 1.0048 | <a href="#">YSSQLAQMOCMITNVEAQLAEIRADLER</a> |                       |
| 6.5   | 3284.5475 | 1.0048 | <a href="#">YSSQLAQMOCMITNVEAQLAEIRADLER</a> |                       |

Mascot: <http://www.matrixscience.com/>



# MATRIX SCIENCE Mascot Search Results

## Peptide View

MS/MS Fragmentation of **RNPPMGGNVVFEDTVITNQEPEYQNHSGR**

Found in **P02745** in **con\_Xuniprot\_HUMAN3**, C1QA\_HUMAN Complement C1q subcomponent subunit A OS=Homo sapiens GN=C1QA PE=1 SV=2

Match to Query 27401: 3269.561936 from(818.397760,4+) intensity(73956.1406) rtinseconds(1743) scans(4212) index(801)

Title: 111019\_Est\_ISCardio\_NMI\_YP\_G\_2Spectrum3648\_scans\_4212

Data file C:\mascot\20140703\_Tmgf\_1D\CSV\_UseAnalysis\MasterCSV\All\_Glyco\mgf\ptm\UC18ERLIC\_PTM\_35D.mgf

Click mouse within plot area to zoom in by factor of two about that point

Or, to Da

Label all possible matches Label matches used for scoring

Show Y-axis

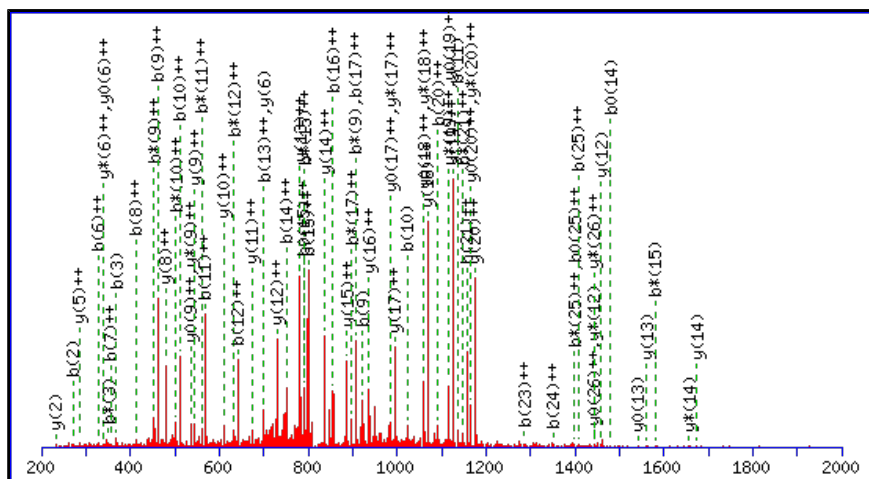

Monoisotopic mass of neutral peptide Mr(calc): 3269.5524

Fixed modifications: Carbamidomethyl (C) (apply to specified residues or termini only)

Variable modifications:

N25 : Deamidated (NQ)

Ions Score: 72 Expect: 1.8e-005

Matches : 72/308 fragment ions using 147 most intense peaks ([help](#))

| #  | b                | b <sup>++</sup>  | b <sup>*</sup>   | b <sup>***</sup> | b <sup>0</sup>   | b <sup>0++</sup> | Seq.     | y                | y <sup>++</sup>  | y <sup>*</sup>   | y <sup>***</sup> | y <sup>0</sup>   | y <sup>0++</sup> | #  |
|----|------------------|------------------|------------------|------------------|------------------|------------------|----------|------------------|------------------|------------------|------------------|------------------|------------------|----|
| 1  | 157.1084         | 79.0578          | 140.0818         | 70.5446          |                  |                  | <b>R</b> |                  |                  |                  |                  |                  |                  | 29 |
| 2  | <b>271.1513</b>  | 136.0793         | 254.1248         | 127.5660         |                  |                  | <b>N</b> | 3114.4585        | 1557.7329        | 3097.4320        | 1549.2196        | 3096.4480        | 1548.7276        | 28 |
| 3  | <b>368.2041</b>  | 184.6057         | <b>351.1775</b>  | 176.0924         |                  |                  | <b>P</b> | 3000.4156        | 1500.7114        | 2983.3891        | 1492.1982        | 2982.4050        | 1491.7062        | 27 |
| 4  | 465.2568         | 233.1321         | 448.2303         | 224.6188         |                  |                  | <b>P</b> | 2903.3629        | 1452.1851        | 2886.3363        | <b>1443.6718</b> | 2885.3523        | <b>1443.1798</b> | 26 |
| 5  | 596.2973         | 298.6523         | 579.2708         | 290.1390         |                  |                  | <b>M</b> | 2806.3101        | 1403.6587        | 2789.2835        | 1395.1454        | 2788.2995        | 1394.6534        | 25 |
| 6  | 653.3188         | <b>327.1630</b>  | 636.2922         | 318.6498         |                  |                  | <b>G</b> | 2675.2696        | 1338.1384        | 2658.2431        | 1329.6252        | 2657.2590        | 1329.1332        | 24 |
| 7  | 710.3403         | <b>355.6738</b>  | 693.3137         | 347.1605         |                  |                  | <b>G</b> | 2618.2481        | 1309.6277        | 2601.2216        | 1301.1144        | 2600.2376        | 1300.6224        | 23 |
| 8  | 824.3832         | <b>412.6952</b>  | 807.3566         | 404.1820         |                  |                  | <b>N</b> | 2561.2267        | 1281.1170        | 2544.2001        | 1272.6037        | 2543.2161        | 1272.1117        | 22 |
| 9  | <b>923.4516</b>  | <b>462.2294</b>  | <b>906.4250</b>  | <b>453.7162</b>  |                  |                  | <b>V</b> | 2447.1837        | 1224.0955        | 2430.1572        | 1215.5822        | 2429.1732        | 1215.0902        | 21 |
| 10 | <b>1022.5200</b> | <b>511.7636</b>  | 1005.4935        | <b>503.2504</b>  |                  |                  | <b>V</b> | 2348.1153        | <b>1174.5613</b> | 2331.0888        | <b>1166.0480</b> | 2330.1048        | <b>1165.5560</b> | 20 |
| 11 | <b>1135.6041</b> | <b>568.3057</b>  | 1118.5775        | <b>559.7924</b>  |                  |                  | <b>I</b> | 2249.0469        | <b>1125.0271</b> | 2232.0204        | <b>1116.5138</b> | 2231.0364        | <b>1116.0218</b> | 19 |
| 12 | 1282.6725        | <b>641.8399</b>  | 1265.6459        | <b>633.3266</b>  |                  |                  | <b>F</b> | 2135.9629        | <b>1068.4851</b> | 2118.9363        | <b>1059.9718</b> | 2117.9523        | <b>1059.4798</b> | 18 |
| 13 | 1397.6994        | <b>699.3534</b>  | 1380.6729        | 690.8401         | 1379.6889        | 690.3481         | <b>D</b> | 1988.8944        | <b>994.9509</b>  | 1971.8679        | <b>986.4376</b>  | 1970.8839        | <b>985.9456</b>  | 17 |
| 14 | 1498.7471        | <b>749.8772</b>  | 1481.7206        | 741.3639         | <b>1480.7365</b> | 740.8719         | <b>T</b> | 1873.8675        | <b>937.4374</b>  | 1856.8409        | 928.9241         | 1855.8569        | 928.4321         | 16 |
| 15 | 1597.8155        | <b>799.4114</b>  | <b>1580.7890</b> | <b>790.8981</b>  | 1579.8050        | <b>790.4061</b>  | <b>V</b> | 1772.8198        | <b>886.9135</b>  | 1755.7933        | 878.4003         | 1754.8093        | 877.9083         | 15 |
| 16 | 1710.8996        | <b>855.9534</b>  | 1693.8730        | 847.4402         | 1692.8890        | 846.9481         | <b>I</b> | <b>1673.7514</b> | <b>837.3793</b>  | <b>1656.7249</b> | 828.8661         | 1655.7408        | 828.3741         | 14 |
| 17 | 1811.9473        | <b>906.4773</b>  | 1794.9207        | <b>897.9640</b>  | 1793.9367        | 897.4720         | <b>T</b> | <b>1560.6673</b> | <b>780.8373</b>  | 1543.6408        | 772.3240         | <b>1542.6568</b> | 771.8320         | 13 |
| 18 | 1925.9902        | 963.4987         | 1908.9636        | 954.9855         | 1907.9796        | 954.4935         | <b>N</b> | <b>1459.6197</b> | <b>730.3135</b>  | <b>1442.5931</b> | 721.8002         | 1441.6091        | 721.3082         | 12 |
| 19 | 2054.0488        | 1027.5280        | 2037.0222        | 1019.0147        | 2036.0382        | 1018.5227        | <b>Q</b> | 1345.5767        | <b>673.2920</b>  | 1328.5502        | 664.7787         | 1327.5662        | 664.2867         | 11 |
| 20 | 2183.0914        | <b>1092.0493</b> | 2166.0648        | 1083.5360        | 2165.0808        | 1083.0440        | <b>E</b> | 1217.5182        | <b>609.2627</b>  | 1200.4916        | 600.7494         | 1199.5076        | 600.2574         | 10 |
| 21 | 2312.1340        | <b>1156.5706</b> | 2295.1074        | <b>1148.0573</b> | 2294.1234        | 1147.5653        | <b>E</b> | 1088.4756        | <b>544.7414</b>  | 1071.4490        | <b>536.2281</b>  | 1070.4650        | <b>535.7361</b>  | 9  |
| 22 | 2409.1867        | 1205.0970        | 2392.1602        | 1196.5837        | 2391.1762        | 1196.0917        | <b>P</b> | 959.4330         | <b>480.2201</b>  | 942.4064         | 471.7068         | 941.4224         | 471.2148         | 8  |



|    |           |                  |           |                  |           |                  |   |                 |                 |          |                 |          |                 |   |
|----|-----------|------------------|-----------|------------------|-----------|------------------|---|-----------------|-----------------|----------|-----------------|----------|-----------------|---|
| 23 | 2572.2501 | <b>1286.6287</b> | 2555.2235 | 1278.1154        | 2554.2395 | 1277.6234        | Y | 862.3802        | 431.6937        | 845.3537 | 423.1805        | 844.3696 | 422.6885        | 7 |
| 24 | 2700.3086 | <b>1350.6580</b> | 2683.2821 | 1342.1447        | 2682.2981 | 1341.6527        | Q | <b>699.3169</b> | 350.1621        | 682.2903 | <b>341.6488</b> | 681.3063 | <b>341.1568</b> | 6 |
| 25 | 2815.3356 | <b>1408.1714</b> | 2798.3090 | <b>1399.6581</b> | 2797.3250 | <b>1399.1661</b> | N | 571.2583        | <b>286.1328</b> | 554.2317 | 277.6195        | 553.2477 | 277.1275        | 5 |
| 26 | 2952.3945 | 1476.7009        | 2935.3679 | 1468.1876        | 2934.3839 | 1467.6956        | H | 456.2314        | 228.6193        | 439.2048 | 220.1060        | 438.2208 | 219.6140        | 4 |
| 27 | 3039.4265 | 1520.2169        | 3022.4000 | 1511.7036        | 3021.4159 | 1511.2116        | S | 319.1724        | 160.0899        | 302.1459 | 151.5766        | 301.1619 | 151.0846        | 3 |
| 28 | 3096.4480 | 1548.7276        | 3079.4214 | 1540.2144        | 3078.4374 | 1539.7223        | G | <b>232.1404</b> | 116.5738        | 215.1139 | 108.0606        |          |                 | 2 |
| 29 |           |                  |           |                  |           |                  | R | 175.1190        | 88.0631         | 158.0924 | 79.5498         |          |                 | 1 |

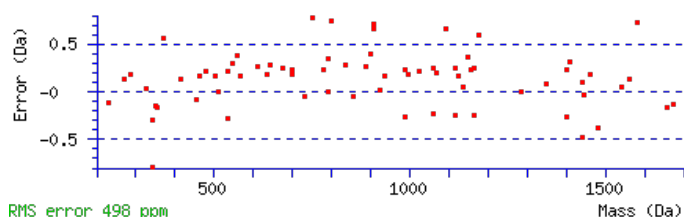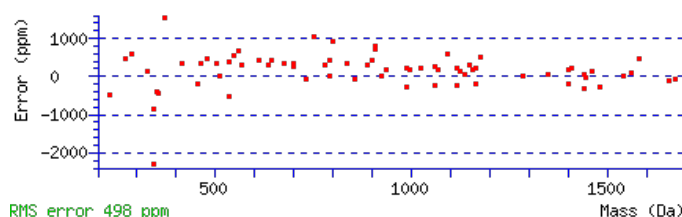

NCBI BLAST search of [RNPPMGGNVVIFDVTITNQEOPYQNHSGR](#)  
 (Parameters: blastp, nr protein database, expect=20000, no filter, PAM30)  
 Other BLAST [web gateways](#)

All matches to this query

| Score | Mr(calc)  | Delta  | Sequence                                      | Site Analysis         |
|-------|-----------|--------|-----------------------------------------------|-----------------------|
| 71.6  | 3269.5524 | 0.0096 | <a href="#">RNPPMGGNVVIFDVTITNQEOPYQNHSGR</a> | Deamidated N25 40.53% |
| 71.6  | 3269.5524 | 0.0096 | <a href="#">RNPPMGGNVVIFDVTITNQEOPYQNHSGR</a> | Deamidated Q24 40.53% |
| 63.6  | 3269.5524 | 0.0096 | <a href="#">RNPPMGGNVVIFDVTITNQEOPYQNHSGR</a> | Deamidated Q19 6.50%  |
| 63.6  | 3269.5524 | 0.0096 | <a href="#">RNPPMGGNVVIFDVTITNQEOPYQNHSGR</a> | Deamidated N18 6.50%  |
| 60.6  | 3269.5524 | 0.0096 | <a href="#">RNPPMGGNVVIFDVTITNQEOPYQNHSGR</a> | Deamidated N8 3.25%   |
| 59.8  | 3269.5524 | 0.0096 | <a href="#">RNPPMGGNVVIFDVTITNQEOPYQNHSGR</a> | Deamidated N2 2.68%   |
| 49.6  | 3268.5684 | 0.9936 | <a href="#">RNPPMGGNVVIFDVTITNQEOPYQNHSGR</a> |                       |
| 13.3  | 3267.5589 | 2.0031 | <a href="#">FLYMSVTMGAMMELLGHRPNGYNSLGAKE</a> |                       |
| 13.3  | 3267.5589 | 2.0031 | <a href="#">FLYMSVTMGAMMELLGHRPNGYNSLGAKE</a> |                       |
| 12.4  | 3269.5577 | 0.0042 | <a href="#">LAIAQELLGLNGRTMMDQMESEDVTTSKR</a> |                       |

Mascot: <http://www.matrixscience.com/>

# MATRIX SCIENCE Mascot Search Results

## Peptide View

MS/MS Fragmentation of **NPPMGGNVVIFDTVITNQEEPYNHSGR**

Found in **P02745** in **con\_Xuniprot\_HUMAN3**, C1QA\_HUMAN Complement C1q subcomponent subunit A OS=Homo sapiens GN=C1QA PE=1 SV=2

Match to Query 27330: 3129.460782 from(1044.160870,3+) intensity(53258.8281) rtinseconds(1761) scans(4422) index(2069)

Title: 111019\_Est\_ISCardio\_NMI\_YP\_G\_4Spectrum3824\_scans\_4422

Data file C:\mascot\20140703\_Tmgf\_1D\CSV\_UseAnalysis\MasterCSV\All\_Glyco\mgf\ptm\UC18ERLIC\_PTM\_35D.mgf

Click mouse within plot area to zoom in by factor of two about that point

Or, to Da

Label all possible matches Label matches used for scoring

Show Y-axis

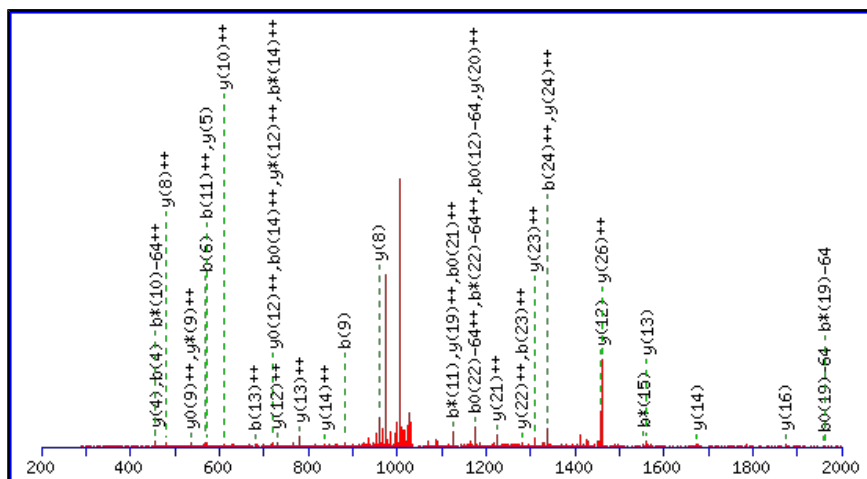

Monoisotopic mass of neutral peptide Mr(calc): 3129.4462

Fixed modifications: Carbamidomethyl (C) (apply to specified residues or termini only)

Variable modifications:

M4 : Oxidation (M), with neutral losses 0.0000(shown in table), 63.9983

N24 : Deamidated (NQ)

Ions Score: 51 Expect: 0.0017

Matches : 41/444 fragment ions using 53 most intense peaks ([help](#))

| #  | b         | b <sup>++</sup> | b <sup>*</sup> | b <sup>*++</sup> | b <sup>0</sup> | b <sup>0++</sup> | Seq. | y         | y <sup>++</sup> | y <sup>*</sup> | y <sup>*++</sup> | y <sup>0</sup> | y <sup>0++</sup> | #  |
|----|-----------|-----------------|----------------|------------------|----------------|------------------|------|-----------|-----------------|----------------|------------------|----------------|------------------|----|
| 1  | 115.0502  | 58.0287         | 98.0237        | 49.5155          |                |                  | N    |           |                 |                |                  |                |                  | 28 |
| 2  | 212.1030  | 106.5551        | 195.0764       | 98.0418          |                |                  | P    | 3016.4105 | 1508.7089       | 2999.3840      | 1500.1956        | 2998.4000      | 1499.7036        | 27 |
| 3  | 309.1557  | 155.0815        | 292.1292       | 146.5682         |                |                  | P    | 2919.3578 | 1460.1825       | 2902.3312      | 1451.6692        | 2901.3472      | 1451.1772        | 26 |
| 4  | 456.1911  | 228.5992        | 439.1646       | 220.0859         |                |                  | M    | 2822.3050 | 1411.6561       | 2805.2785      | 1403.1429        | 2804.2944      | 1402.6509        | 25 |
| 5  | 513.2126  | 257.1099        | 496.1860       | 248.5967         |                |                  | G    | 2675.2696 | 1338.1384       | 2658.2431      | 1329.6252        | 2657.2590      | 1329.1332        | 24 |
| 6  | 570.2341  | 285.6207        | 553.2075       | 277.1074         |                |                  | G    | 2618.2481 | 1309.6277       | 2601.2216      | 1301.1144        | 2600.2376      | 1300.6224        | 23 |
| 7  | 684.2770  | 342.6421        | 667.2504       | 334.1289         |                |                  | N    | 2561.2267 | 1281.1170       | 2544.2001      | 1272.6037        | 2543.2161      | 1272.1117        | 22 |
| 8  | 783.3454  | 392.1763        | 766.3189       | 383.6631         |                |                  | V    | 2447.1837 | 1224.0955       | 2430.1572      | 1215.5822        | 2429.1732      | 1215.0902        | 21 |
| 9  | 882.4138  | 441.7105        | 865.3873       | 433.1973         |                |                  | V    | 2348.1153 | 1174.5613       | 2331.0888      | 1166.0480        | 2330.1048      | 1165.5560        | 20 |
| 10 | 995.4979  | 498.2526        | 978.4713       | 489.7393         |                |                  | I    | 2249.0469 | 1125.0271       | 2232.0204      | 1116.5138        | 2231.0364      | 1116.0218        | 19 |
| 11 | 1142.5663 | 571.7868        | 1125.5397      | 563.2735         |                |                  | F    | 2135.9629 | 1068.4851       | 2118.9363      | 1059.9718        | 2117.9523      | 1059.4798        | 18 |
| 12 | 1257.5932 | 629.3003        | 1240.5667      | 620.7870         | 1239.5827      | 620.2950         | D    | 1988.8944 | 994.9509        | 1971.8679      | 986.4376         | 1970.8839      | 985.9456         | 17 |
| 13 | 1358.6409 | 679.8241        | 1341.6144      | 671.3108         | 1340.6303      | 670.8188         | T    | 1873.8675 | 937.4374        | 1856.8409      | 928.9241         | 1855.8569      | 928.4321         | 16 |
| 14 | 1457.7093 | 729.3583        | 1440.6828      | 720.8450         | 1439.6988      | 720.3530         | V    | 1772.8198 | 886.9135        | 1755.7933      | 878.4003         | 1754.8093      | 877.9083         | 15 |
| 15 | 1570.7934 | 785.9003        | 1553.7668      | 777.3871         | 1552.7828      | 776.8951         | I    | 1673.7514 | 837.3793        | 1656.7249      | 828.8661         | 1655.7408      | 828.3741         | 14 |
| 16 | 1671.8411 | 836.4242        | 1654.8145      | 827.9109         | 1653.8305      | 827.4189         | T    | 1560.6673 | 780.8373        | 1543.6408      | 772.3240         | 1542.6568      | 771.8320         | 13 |
| 17 | 1785.8840 | 893.4456        | 1768.8574      | 884.9324         | 1767.8734      | 884.4404         | N    | 1459.6197 | 730.3135        | 1442.5931      | 721.8002         | 1441.6091      | 721.3082         | 12 |
| 18 | 1913.9426 | 957.4749        | 1896.9160      | 948.9617         | 1895.9320      | 948.4696         | Q    | 1345.5767 | 673.2920        | 1328.5502      | 664.7787         | 1327.5662      | 664.2867         | 11 |
| 19 | 2042.9852 | 1021.9962       | 2025.9586      | 1013.4829        | 2024.9746      | 1012.9909        | E    | 1217.5182 | 609.2627        | 1200.4916      | 600.7494         | 1199.5076      | 600.2574         | 10 |
| 20 | 2172.0278 | 1086.5175       | 2155.0012      | 1078.0042        | 2154.0172      | 1077.5122        | E    | 1088.4756 | 544.7414        | 1071.4490      | 536.2281         | 1070.4650      | 535.7361         | 9  |
| 21 | 2269.0805 | 1135.0439       | 2252.0540      | 1126.5306        | 2251.0700      | 1126.0386        | P    | 959.4330  | 480.2201        | 942.4064       | 471.7068         | 941.4224       | 471.2148         | 8  |

|    |           |                  |           |           |           |           |   |                 |          |          |          |          |          |   |
|----|-----------|------------------|-----------|-----------|-----------|-----------|---|-----------------|----------|----------|----------|----------|----------|---|
| 22 | 2432.1439 | 1216.5756        | 2415.1173 | 1208.0623 | 2414.1333 | 1207.5703 | Y | 862.3802        | 431.6937 | 845.3537 | 423.1805 | 844.3696 | 422.6885 | 7 |
| 23 | 2560.2024 | <b>1280.6049</b> | 2543.1759 | 1272.0916 | 2542.1919 | 1271.5996 | Q | 699.3169        | 350.1621 | 682.2903 | 341.6488 | 681.3063 | 341.1568 | 6 |
| 24 | 2675.2294 | <b>1338.1183</b> | 2658.2028 | 1329.6051 | 2657.2188 | 1329.1130 | N | <b>571.2583</b> | 286.1328 | 554.2317 | 277.6195 | 553.2477 | 277.1275 | 5 |
| 25 | 2812.2883 | 1406.6478        | 2795.2617 | 1398.1345 | 2794.2777 | 1397.6425 | H | <b>456.2314</b> | 228.6193 | 439.2048 | 220.1060 | 438.2208 | 219.6140 | 4 |
| 26 | 2899.3203 | 1450.1638        | 2882.2938 | 1441.6505 | 2881.3098 | 1441.1585 | S | 319.1724        | 160.0899 | 302.1459 | 151.5766 | 301.1619 | 151.0846 | 3 |
| 27 | 2956.3418 | 1478.6745        | 2939.3152 | 1470.1613 | 2938.3312 | 1469.6692 | G | 232.1404        | 116.5738 | 215.1139 | 108.0606 |          |          | 2 |
| 28 |           |                  |           |           |           |           | R | 175.1190        | 88.0631  | 158.0924 | 79.5498  |          |          | 1 |

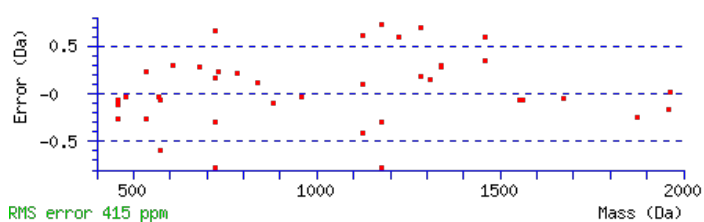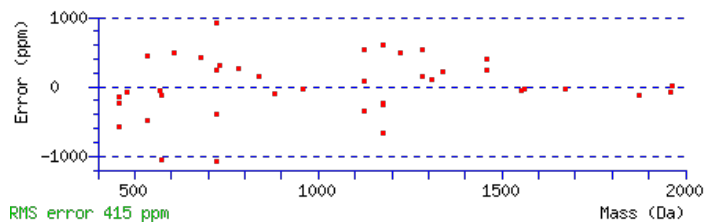

NCBI BLAST search of [NPPMGGNVVIFDTVITNQEEPYQNHSGR](#)  
 (Parameters: blastp, nr protein database, expect=20000, no filter, PAM30)  
 Other BLAST [web gateways](#)

All matches to this query

| Score | Mr(calc)  | Delta  | Sequence                                       | Site Analysis         |
|-------|-----------|--------|------------------------------------------------|-----------------------|
| 50.9  | 3129.4462 | 0.0146 | <a href="#">NPPMGGNVVIFDTVITNQEEPYQNHSGR</a>   | Deamidated N24 27.64% |
| 50.9  | 3129.4462 | 0.0146 | <a href="#">NPPMGGNVVIFDTVITNQEEPYQNHSGR</a>   | Deamidated Q23 27.64% |
| 50.5  | 3129.4462 | 0.0146 | <a href="#">NPPMGGNVVIFDTVITNQEEPYQNHSGR</a>   | Deamidated N17 25.21% |
| 49.0  | 3129.4462 | 0.0146 | <a href="#">NPPMGGNVVIFDTVITNQEEPYQNHSGR</a>   | Deamidated Q18 17.68% |
| 36.4  | 3129.4462 | 0.0146 | <a href="#">NPPMGGNVVIFDTVITNQEEPYQNHSGR</a>   | Deamidated N7 0.98%   |
| 35.8  | 3129.4462 | 0.0146 | <a href="#">NPPMGGNVVIFDTVITNQEEPYQNHSGR</a>   | Deamidated N1 0.85%   |
| 33.4  | 3128.4622 | 0.9986 | <a href="#">NPPMGGNVVIFDTVITNQEEPYQNHSGR</a>   |                       |
| 5.1   | 3127.4694 | 1.9914 | <a href="#">NAGTDIEDRIHHVTNQSGTWTSSKLETK</a>   |                       |
| 4.6   | 3127.4511 | 2.0096 | <a href="#">QYLEKMLDESSGAAAGGQSHSMVMETLLK</a>  |                       |
| 3.5   | 3129.4608 | 0.0000 | <a href="#">MNFLRGVMGGQSAGPQHTAE TVRGAADPK</a> |                       |

Mascot: <http://www.matrixscience.com/>

# MASCOT SCIENCE Mascot Search Results

## Peptide View

MS/MS Fragmentation of **AVNITSENLIDDVVSLIR**

Found in **P02748** in **con\_Xuniprot\_HUMAN3**, CO9\_HUMAN Complement component C9 OS=Homo sapiens GN=C9 PE=1 SV=2

Match to Query 11794: 1971.057528 from(986.536040,2+) intensity(935934.3125) rtinseconds(2936) scans(7609) index(1048)

Title: 111019\_Est\_ISCardio\_NMI\_YP\_G\_2Spectrum6684\_scans\_\_7609

Data file C:\mascot\20140703\_Tmgf\_1D\CSV\_UseAnalysis\MasterCSV\All\_Glyco\mgf\ptm\UC18ERLIC\_PTM\_35D.mgf

Click mouse within plot area to zoom in by factor of two about that point

Or, to Da

Label all possible matches Label matches used for scoring

Show Y-axis

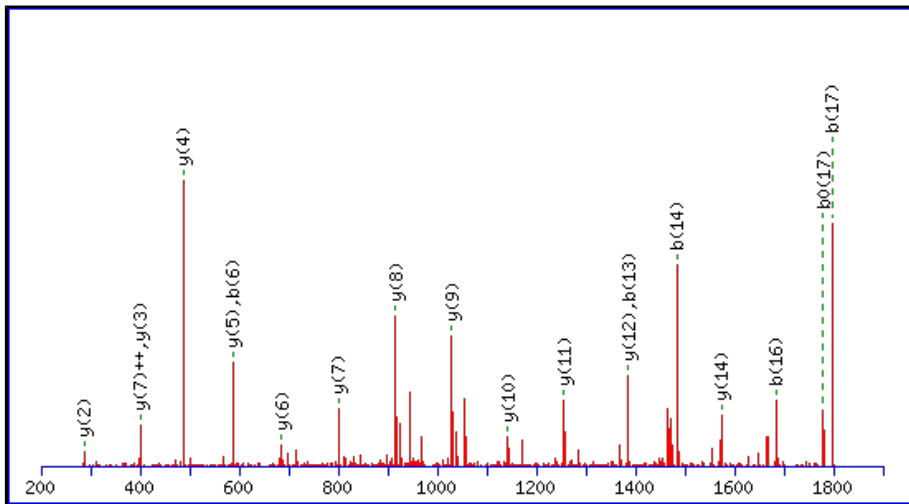

Monoisotopic mass of neutral peptide Mr(calc): 1971.0524

Fixed modifications: Carbamidomethyl (C) (apply to specified residues or termini only)

Variable modifications:

N3 : Deamidated (NQ)

Ions Score: 130 Expect: 1.7e-011

Matches : 19/186 fragment ions using 16 most intense peaks ([help](#))

| #  | b                | b <sup>++</sup> | b <sup>*</sup> | b <sup>*++</sup> | b <sup>0</sup>   | b <sup>0++</sup> | Seq. | y                | y <sup>++</sup> | y <sup>*</sup> | y <sup>*++</sup> | y <sup>0</sup> | y <sup>0++</sup> | #  |
|----|------------------|-----------------|----------------|------------------|------------------|------------------|------|------------------|-----------------|----------------|------------------|----------------|------------------|----|
| 1  | 72.0444          | 36.5258         |                |                  |                  |                  | A    |                  |                 |                |                  |                |                  | 18 |
| 2  | 171.1128         | 86.0600         |                |                  |                  |                  | V    | 1901.0226        | 951.0149        | 1883.9960      | 942.5017         | 1883.0120      | 942.0097         | 17 |
| 3  | 286.1397         | 143.5735        | 269.1132       | 135.0602         |                  |                  | N    | 1801.9542        | 901.4807        | 1784.9276      | 892.9675         | 1783.9436      | 892.4754         | 16 |
| 4  | 399.2238         | 200.1155        | 382.1973       | 191.6023         |                  |                  | I    | 1686.9272        | 843.9673        | 1669.9007      | 835.4540         | 1668.9167      | 834.9620         | 15 |
| 5  | 500.2715         | 250.6394        | 483.2449       | 242.1261         | 482.2609         | 241.6341         | T    | <b>1573.8432</b> | 787.4252        | 1556.8166      | 778.9120         | 1555.8326      | 778.4199         | 14 |
| 6  | <b>587.3035</b>  | 294.1554        | 570.2770       | 285.6421         | 569.2930         | 285.1501         | S    | 1472.7955        | 736.9014        | 1455.7689      | 728.3881         | 1454.7849      | 727.8961         | 13 |
| 7  | 716.3461         | 358.6767        | 699.3196       | 350.1634         | 698.3355         | 349.6714         | E    | <b>1385.7635</b> | 693.3854        | 1368.7369      | 684.8721         | 1367.7529      | 684.3801         | 12 |
| 8  | 830.3890         | 415.6982        | 813.3625       | 407.1849         | 812.3785         | 406.6929         | N    | <b>1256.7209</b> | 628.8641        | 1239.6943      | 620.3508         | 1238.7103      | 619.8588         | 11 |
| 9  | 943.4731         | 472.2402        | 926.4466       | 463.7269         | 925.4625         | 463.2349         | L    | <b>1142.6780</b> | 571.8426        | 1125.6514      | 563.3293         | 1124.6674      | 562.8373         | 10 |
| 10 | 1056.5572        | 528.7822        | 1039.5306      | 520.2689         | 1038.5466        | 519.7769         | I    | <b>1029.5939</b> | 515.3006        | 1012.5673      | 506.7873         | 1011.5833      | 506.2953         | 9  |
| 11 | 1171.5841        | 586.2957        | 1154.5576      | 577.7824         | 1153.5735        | 577.2904         | D    | <b>916.5098</b>  | 458.7585        | 899.4833       | 450.2453         | 898.4993       | 449.7533         | 8  |
| 12 | 1286.6111        | 643.8092        | 1269.5845      | 635.2959         | 1268.6005        | 634.8039         | D    | <b>801.4829</b>  | <b>401.2451</b> | 784.4563       | 392.7318         | 783.4723       | 392.2398         | 7  |
| 13 | <b>1385.6795</b> | 693.3434        | 1368.6529      | 684.8301         | 1367.6689        | 684.3381         | V    | <b>686.4559</b>  | 343.7316        | 669.4294       | 335.2183         | 668.4454       | 334.7263         | 6  |
| 14 | <b>1484.7479</b> | 742.8776        | 1467.7213      | 734.3643         | 1466.7373        | 733.8723         | V    | <b>587.3875</b>  | 294.1974        | 570.3610       | 285.6841         | 569.3770       | 285.1921         | 5  |
| 15 | 1571.7799        | 786.3936        | 1554.7534      | 777.8803         | 1553.7693        | 777.3883         | S    | <b>488.3191</b>  | 244.6632        | 471.2926       | 236.1499         | 470.3085       | 235.6579         | 4  |
| 16 | <b>1684.8640</b> | 842.9356        | 1667.8374      | 834.4223         | 1666.8534        | 833.9303         | L    | <b>401.2871</b>  | 201.1472        | 384.2605       | 192.6339         |                |                  | 3  |
| 17 | <b>1797.9480</b> | 899.4777        | 1780.9215      | 890.9644         | <b>1779.9375</b> | 890.4724         | I    | <b>288.2030</b>  | 144.6051        | 271.1765       | 136.0919         |                |                  | 2  |
| 18 |                  |                 |                |                  |                  |                  | R    | 175.1190         | 88.0631         | 158.0924       | 79.5498          |                |                  | 1  |

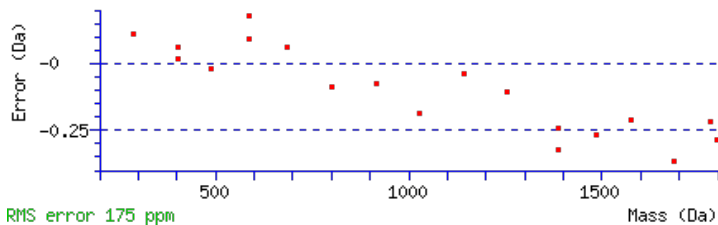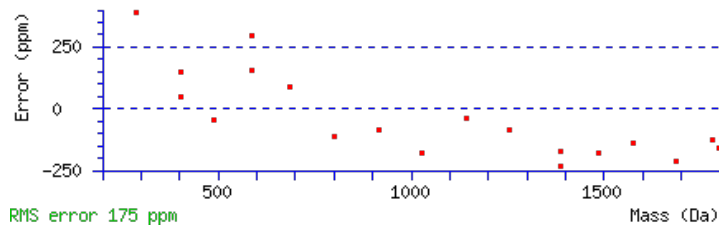

NCBI **BLAST** search of [AVNITSENLIDDVVSLIR](#)

(Parameters: blastp, nr protein database, expect=20000, no filter, PAM30)

Other BLAST [web gateways](#)

**All matches to this query**

| Score | Mr(calc)  | Delta   | Sequence                           | Site Analysis         |
|-------|-----------|---------|------------------------------------|-----------------------|
| 129.9 | 1971.0524 | 0.0051  | <a href="#">AVNITSENLIDDVVSLIR</a> | Deamidated N3 100.00% |
| 78.5  | 1971.0524 | 0.0051  | <a href="#">AVNITSENLIDDVVSLIR</a> | Deamidated N8 0.00%   |
| 23.8  | 1970.0486 | 1.0089  | <a href="#">RAVDPFVVEWVAARALR</a>  |                       |
| 21.2  | 1970.0506 | 1.0069  | <a href="#">LLPMNDQIRELQTIIR</a>   |                       |
| 12.4  | 1970.0506 | 1.0069  | <a href="#">LLPMNDQIRELQTIIR</a>   |                       |
| 12.1  | 1970.0506 | 1.0069  | <a href="#">LLPMNDQIRELQTIIR</a>   |                       |
| 12.0  | 1971.0637 | -0.0061 | <a href="#">SSSSPLVVVSVKSPNQLR</a> |                       |
| 12.0  | 1971.0637 | -0.0061 | <a href="#">SSSSPLVVVSVKSPNQLR</a> |                       |
| 9.8   | 1970.0545 | 1.0031  | <a href="#">IAANVARSEONLOVTLR</a>  |                       |
| 9.6   | 1970.0480 | 1.0096  | <a href="#">NMLVEVRGEGVQAGSRLR</a> |                       |

Mascot: <http://www.matrixscience.com/>

# MATRIX SCIENCE Mascot Search Results

## Peptide View

MS/MS Fragmentation of **CNGDNDCGDFSDEDDCESEPRPPCR**

Found in **P02748** in **con\_Xuniprot\_HUMAN3**, CO9\_HUMAN Complement component C9 OS=Homo sapiens GN=C9 PE=1 SV=2

Match to Query 27245: 3003.033762 from(1002.018530,3+) intensity(12545.1436) rtinseconds(635) scans(1221) index(14042)

Title: 111019\_Est\_ML\_YP\_G\_02Spectrum1000\_scans\_\_1221

Data file C:\mascot\20140703\_Tmgf\_1D\CSV\_UseAnalysis\MasterCSV\All\_Glyco\mgf\ptm\UC18ERLIC\_PTM\_35D.mgf

Click mouse within plot area to zoom in by factor of two about that point

Or, to Da

Label all possible matches Label matches used for scoring

Show Y-axis

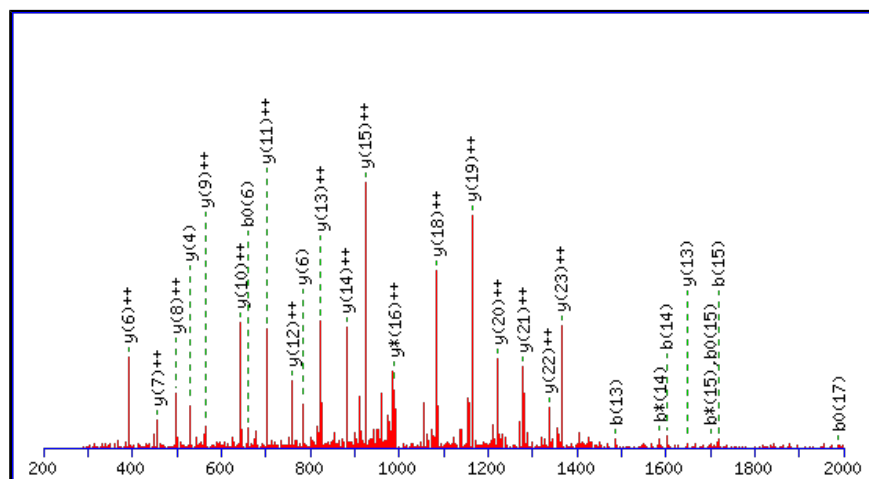

Monoisotopic mass of neutral peptide Mr(calc): 3003.0284

Fixed modifications: Carbamidomethyl (C) (apply to specified residues or termini only)

Variable modifications:

N5 : Deamidated (NQ)

Ions Score: 100 Expect: 9.4e-011

Matches : 28/268 fragment ions using 54 most intense peaks ([help](#))

| #  | b         | b <sup>++</sup> | b <sup>*</sup> | b <sup>*++</sup> | b <sup>0</sup> | b <sup>0++</sup> | Seq. | y         | y <sup>++</sup> | y <sup>*</sup> | y <sup>*++</sup> | y <sup>0</sup> | y <sup>0++</sup> | #  |
|----|-----------|-----------------|----------------|------------------|----------------|------------------|------|-----------|-----------------|----------------|------------------|----------------|------------------|----|
| 1  | 161.0379  | 81.0226         |                |                  |                |                  | C    |           |                 |                |                  |                |                  | 25 |
| 2  | 275.0809  | 138.0441        | 258.0543       | 129.5308         |                |                  | N    | 2844.0050 | 1422.5061       | 2826.9785      | 1413.9929        | 2825.9944      | 1413.5009        | 24 |
| 3  | 332.1023  | 166.5548        | 315.0758       | 158.0415         |                |                  | G    | 2729.9621 | 1365.4847       | 2712.9355      | 1356.9714        | 2711.9515      | 1356.4794        | 23 |
| 4  | 447.1293  | 224.0683        | 430.1027       | 215.5550         | 429.1187       | 215.0630         | D    | 2672.9406 | 1336.9739       | 2655.9141      | 1328.4607        | 2654.9301      | 1327.9687        | 22 |
| 5  | 562.1562  | 281.5817        | 545.1297       | 273.0685         | 544.1456       | 272.5765         | N    | 2557.9137 | 1279.4605       | 2540.8871      | 1270.9472        | 2539.9031      | 1270.4552        | 21 |
| 6  | 677.1831  | 339.0952        | 660.1566       | 330.5819         | 659.1726       | 330.0899         | D    | 2442.8867 | 1221.9470       | 2425.8602      | 1213.4337        | 2424.8762      | 1212.9417        | 20 |
| 7  | 837.2138  | 419.1105        | 820.1872       | 410.5973         | 819.2032       | 410.1053         | C    | 2327.8598 | 1164.4335       | 2310.8332      | 1155.9203        | 2309.8492      | 1155.4282        | 19 |
| 8  | 894.2353  | 447.6213        | 877.2087       | 439.1080         | 876.2247       | 438.6160         | G    | 2167.8291 | 1084.4182       | 2150.8026      | 1075.9049        | 2149.8186      | 1075.4129        | 18 |
| 9  | 1009.2622 | 505.1347        | 992.2357       | 496.6215         | 991.2516       | 496.1295         | D    | 2110.8077 | 1055.9075       | 2093.7811      | 1047.3942        | 2092.7971      | 1046.9022        | 17 |
| 10 | 1156.3306 | 578.6689        | 1139.3041      | 570.1557         | 1138.3201      | 569.6637         | F    | 1995.7807 | 998.3940        | 1978.7542      | 989.8807         | 1977.7702      | 989.3887         | 16 |
| 11 | 1243.3626 | 622.1850        | 1226.3361      | 613.6717         | 1225.3521      | 613.1797         | S    | 1848.7123 | 924.8598        | 1831.6858      | 916.3465         | 1830.7018      | 915.8545         | 15 |
| 12 | 1358.3896 | 679.6984        | 1341.3630      | 671.1852         | 1340.3790      | 670.6931         | D    | 1761.6803 | 881.3438        | 1744.6537      | 872.8305         | 1743.6697      | 872.3385         | 14 |
| 13 | 1487.4322 | 744.2197        | 1470.4056      | 735.7065         | 1469.4216      | 735.2144         | E    | 1646.6533 | 823.8303        | 1629.6268      | 815.3170         | 1628.6428      | 814.8250         | 13 |
| 14 | 1602.4591 | 801.7332        | 1585.4326      | 793.2199         | 1584.4486      | 792.7279         | D    | 1517.6108 | 759.3090        | 1500.5842      | 750.7957         | 1499.6002      | 750.3037         | 12 |
| 15 | 1717.4861 | 859.2467        | 1700.4595      | 850.7334         | 1699.4755      | 850.2414         | D    | 1402.5838 | 701.7955        | 1385.5573      | 693.2823         | 1384.5732      | 692.7903         | 11 |
| 16 | 1877.5167 | 939.2620        | 1860.4902      | 930.7487         | 1859.5061      | 930.2567         | C    | 1287.5569 | 644.2821        | 1270.5303      | 635.7688         | 1269.5463      | 635.2768         | 10 |
| 17 | 2006.5593 | 1003.7833       | 1989.5328      | 995.2700         | 1988.5487      | 994.7780         | E    | 1127.5262 | 564.2667        | 1110.4997      | 555.7535         | 1109.5157      | 555.2615         | 9  |
| 18 | 2093.5913 | 1047.2993       | 2076.5648      | 1038.7860        | 2075.5808      | 1038.2940        | S    | 998.4836  | 499.7455        | 981.4571       | 491.2322         | 980.4731       | 490.7402         | 8  |
| 19 | 2222.6339 | 1111.8206       | 2205.6074      | 1103.3073        | 2204.6234      | 1102.8153        | E    | 911.4516  | 456.2294        | 894.4250       | 447.7162         | 893.4410       | 447.2242         | 7  |
| 20 | 2319.6867 | 1160.3470       | 2302.6601      | 1151.8337        | 2301.6761      | 1151.3417        | P    | 782.4090  | 391.7081        | 765.3825       | 383.1949         |                |                  | 6  |
| 21 | 2475.7878 | 1238.3975       | 2458.7613      | 1229.8843        | 2457.7772      | 1229.3923        | R    | 685.3562  | 343.1818        | 668.3297       | 334.6685         |                |                  | 5  |
| 22 | 2572.8406 | 1286.9239       | 2555.8140      | 1278.4106        | 2554.8300      | 1277.9186        | P    | 529.2551  | 265.1312        | 512.2286       | 256.6179         |                |                  | 4  |
| 23 | 2669.8933 | 1335.4503       | 2652.8668      | 1326.9370        | 2651.8828      | 1326.4450        | P    | 432.2024  | 216.6048        | 415.1758       | 208.0915         |                |                  | 3  |

|    |           |           |           |           |           |           |   |          |          |          |          |  |  |   |
|----|-----------|-----------|-----------|-----------|-----------|-----------|---|----------|----------|----------|----------|--|--|---|
| 24 | 2829.9240 | 1415.4656 | 2812.8974 | 1406.9524 | 2811.9134 | 1406.4603 | C | 335.1496 | 168.0784 | 318.1231 | 159.5652 |  |  | 2 |
| 25 |           |           |           |           |           |           | R | 175.1190 | 88.0631  | 158.0924 | 79.5498  |  |  | 1 |

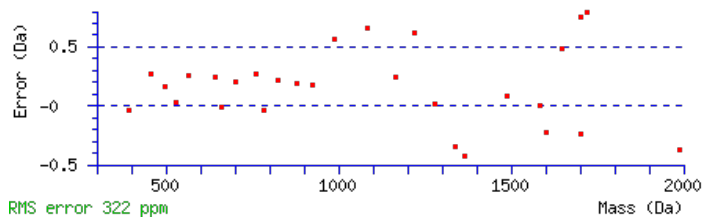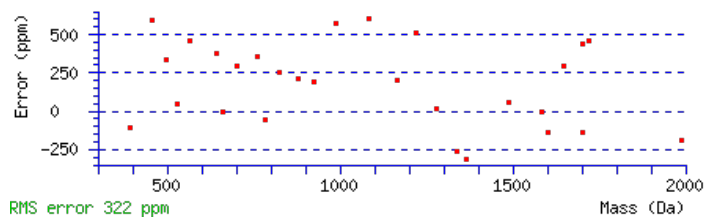

NCBI BLAST search of [CNGDNDCGDFSEDEDDCESEPRPPCR](#)  
 (Parameters: blastp, nr protein database, expect=20000, no filter, PAM30)  
 Other BLAST [web gateways](#)

All matches to this query

| Score | Mr(calc)  | Delta  | Sequence                                   | Site Analysis        |
|-------|-----------|--------|--------------------------------------------|----------------------|
| 100.3 | 3003.0284 | 0.0054 | <a href="#">CNGDNDCGDFSEDEDDCESEPRPPCR</a> | Deamidated N5 62.56% |
| 98.0  | 3003.0284 | 0.0054 | <a href="#">CNGDNDCGDFSEDEDDCESEPRPPCR</a> | Deamidated N2 37.44% |
| 81.4  | 3002.0444 | 0.9894 | <a href="#">CNGDNDCGDFSEDEDDCESEPRPPCR</a> |                      |

Mascot: <http://www.matrixscience.com/>



# MASCOT SCIENCE Mascot Search Results

## Peptide View

MS/MS Fragmentation of **AVNITSENLIDDVVSLIRGGTR**

Found in **P02748** in **con\_Xuniprot\_HUMAN3**, CO9\_HUMAN Complement component C9 OS=Homo sapiens GN=C9 PE=1 SV=2

Match to Query 15494: 2342.251122 from(781.757650,3+) intensity(23989.6855) rtinseconds(2924) scans(7937) index(24229)

Title: 111019\_Est\_ML\_YS\_G\_05Spectrum6910\_scans\_\_7937

Data file C:\mascot\20140703\_Tmgf\_1D\CSV\_UseAnalysis\MasterCSV\All\_Glyco\mgf\ptm\UC18ERLIC\_PTM\_35D.mgf

Click mouse within plot area to zoom in by factor of two about that point

Or, to Da

Label all possible matches Label matches used for scoring

Show Y-axis

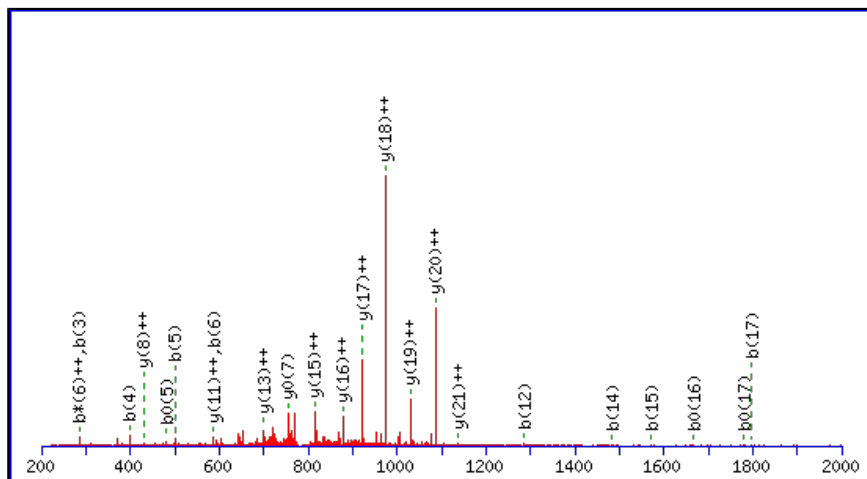

Monoisotopic mass of neutral peptide Mr(calc): 2342.2441

Fixed modifications: Carbamidomethyl (C) (apply to specified residues or termini only)

Variable modifications:

N3 : Deamidated (NQ)

Ions Score: 46 Expect: 0.0037

Matches : 23/238 fragment ions using 53 most intense peaks ([help](#))

| #  | b         | b <sup>++</sup> | b <sup>*</sup> | b <sup>*++</sup> | b <sup>0</sup> | b <sup>0++</sup> | Seq. | y         | y <sup>++</sup> | y <sup>*</sup> | y <sup>*++</sup> | y <sup>0</sup> | y <sup>0++</sup> | #  |
|----|-----------|-----------------|----------------|------------------|----------------|------------------|------|-----------|-----------------|----------------|------------------|----------------|------------------|----|
| 1  | 72.0444   | 36.5258         |                |                  |                |                  | A    |           |                 |                |                  |                |                  | 22 |
| 2  | 171.1128  | 86.0600         |                |                  |                |                  | V    | 2272.2143 | 1136.6108       | 2255.1878      | 1128.0975        | 2254.2038      | 1127.6055        | 21 |
| 3  | 286.1397  | 143.5735        | 269.1132       | 135.0602         |                |                  | N    | 2173.1459 | 1087.0766       | 2156.1194      | 1078.5633        | 2155.1353      | 1078.0713        | 20 |
| 4  | 399.2238  | 200.1155        | 382.1973       | 191.6023         |                |                  | I    | 2058.1190 | 1029.5631       | 2041.0924      | 1021.0498        | 2040.1084      | 1020.5578        | 19 |
| 5  | 500.2715  | 250.6394        | 483.2449       | 242.1261         | 482.2609       | 241.6341         | T    | 1945.0349 | 973.0211        | 1928.0083      | 964.5078         | 1927.0243      | 964.0158         | 18 |
| 6  | 587.3035  | 294.1554        | 570.2770       | 285.6421         | 569.2930       | 285.1501         | S    | 1843.9872 | 922.4972        | 1826.9607      | 913.9840         | 1825.9767      | 913.4920         | 17 |
| 7  | 716.3461  | 358.6767        | 699.3196       | 350.1634         | 698.3355       | 349.6714         | E    | 1756.9552 | 878.9812        | 1739.9286      | 870.4680         | 1738.9446      | 869.9759         | 16 |
| 8  | 830.3890  | 415.6982        | 813.3625       | 407.1849         | 812.3785       | 406.6929         | N    | 1627.9126 | 814.4599        | 1610.8860      | 805.9467         | 1609.9020      | 805.4547         | 15 |
| 9  | 943.4731  | 472.2402        | 926.4466       | 463.7269         | 925.4625       | 463.2349         | L    | 1513.8697 | 757.4385        | 1496.8431      | 748.9252         | 1495.8591      | 748.4332         | 14 |
| 10 | 1056.5572 | 528.7822        | 1039.5306      | 520.2689         | 1038.5466      | 519.7769         | I    | 1400.7856 | 700.8964        | 1383.7591      | 692.3832         | 1382.7750      | 691.8912         | 13 |
| 11 | 1171.5841 | 586.2957        | 1154.5576      | 577.7824         | 1153.5735      | 577.2904         | D    | 1287.7015 | 644.3544        | 1270.6750      | 635.8411         | 1269.6910      | 635.3491         | 12 |
| 12 | 1286.6111 | 643.8092        | 1269.5845      | 635.2959         | 1268.6005      | 634.8039         | D    | 1172.6746 | 586.8409        | 1155.6480      | 578.3277         | 1154.6640      | 577.8357         | 11 |
| 13 | 1385.6795 | 693.3434        | 1368.6529      | 684.8301         | 1367.6689      | 684.3381         | V    | 1057.6477 | 529.3275        | 1040.6211      | 520.8142         | 1039.6371      | 520.3222         | 10 |
| 14 | 1484.7479 | 742.8776        | 1467.7213      | 734.3643         | 1466.7373      | 733.8723         | V    | 958.5792  | 479.7933        | 941.5527       | 471.2800         | 940.5687       | 470.7880         | 9  |
| 15 | 1571.7799 | 786.3936        | 1554.7534      | 777.8803         | 1553.7693      | 777.3883         | S    | 859.5108  | 430.2591        | 842.4843       | 421.7458         | 841.5003       | 421.2538         | 8  |
| 16 | 1684.8640 | 842.9356        | 1667.8374      | 834.4223         | 1666.8534      | 833.9303         | L    | 772.4788  | 386.7430        | 755.4522       | 378.2298         | 754.4682       | 377.7378         | 7  |
| 17 | 1797.9480 | 899.4777        | 1780.9215      | 890.9644         | 1779.9375      | 890.4724         | I    | 659.3947  | 330.2010        | 642.3682       | 321.6877         | 641.3842       | 321.1957         | 6  |
| 18 | 1954.0491 | 977.5282        | 1937.0226      | 969.0149         | 1936.0386      | 968.5229         | R    | 546.3107  | 273.6590        | 529.2841       | 265.1457         | 528.3001       | 264.6537         | 5  |
| 19 | 2011.0706 | 1006.0389       | 1994.0441      | 997.5257         | 1993.0600      | 997.0337         | G    | 390.2096  | 195.6084        | 373.1830       | 187.0951         | 372.1990       | 186.6031         | 4  |
| 20 | 2068.0921 | 1034.5497       | 2051.0655      | 1026.0364        | 2050.0815      | 1025.5444        | G    | 333.1881  | 167.0977        | 316.1615       | 158.5844         | 315.1775       | 158.0924         | 3  |
| 21 | 2169.1398 | 1085.0735       | 2152.1132      | 1076.5602        | 2151.1292      | 1076.0682        | T    | 276.1666  | 138.5870        | 259.1401       | 130.0737         | 258.1561       | 129.5817         | 2  |
| 22 |           |                 |                |                  |                |                  | R    | 175.1190  | 88.0631         | 158.0924       | 79.5498          |                |                  | 1  |

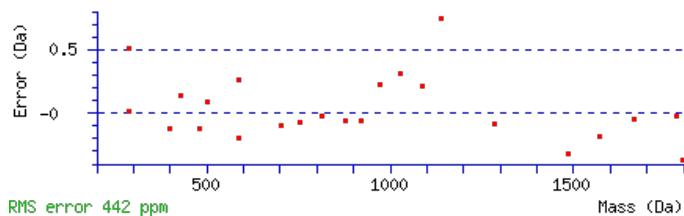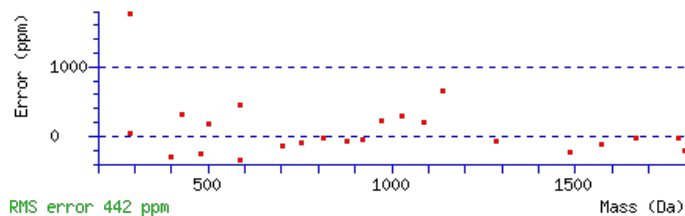

NCBI BLAST search of [AVNITSENLIDDVVSLIRGGTR](#)

(Parameters: blastp, nr protein database, expect=20000, no filter, PAM30)

Other BLAST [web gateways](#)

All matches to this query

| Score | Mr(calc)  | Delta  | Sequence                               | Site Analysis        |
|-------|-----------|--------|----------------------------------------|----------------------|
| 46.5  | 2342.2441 | 0.0070 | <a href="#">AVNITSENLIDDVVSLIRGGTR</a> | Deamidated N3 86.67% |
| 38.3  | 2342.2441 | 0.0070 | <a href="#">AVNITSENLIDDVVSLIRGGTR</a> | Deamidated N8 13.33% |
| 7.7   | 2340.2325 | 2.0186 | <a href="#">AIVLFNPDSKGLSNPAEVEALR</a> |                      |
| 7.1   | 2341.2376 | 1.0135 | <a href="#">QLQQLQQLRDSGEKVVEIVK</a>   |                      |
| 6.2   | 2341.2376 | 1.0135 | <a href="#">QLQQLQQLRDSGEKVVEIVK</a>   |                      |
| 6.2   | 2341.2376 | 1.0135 | <a href="#">QLQQLQQLRDSGEKVVEIVK</a>   |                      |
| 5.9   | 2342.2481 | 0.0030 | <a href="#">AVDLTKPYQNQQLSIRVPLR</a>   |                      |
| 5.8   | 2341.2376 | 1.0135 | <a href="#">QLQQLQQLRDSGEKVVEIVK</a>   |                      |
| 5.0   | 2340.2536 | 1.9975 | <a href="#">QLQQLQQLRDSGEKVVEIVK</a>   |                      |
| 5.0   | 2340.2536 | 1.9975 | <a href="#">QLQQLQQLRDSGEKVVEIVK</a>   |                      |

Mascot: <http://www.matrixscience.com/>

# MATRIX SCIENCE Mascot Search Results

## Peptide View

MS/MS Fragmentation of **VYKPSAGNNSLYR**

Found in **J3QLI0** in **con\_Xuniprot\_HUMAN3**, J3QLI0\_HUMAN Beta-2-glycoprotein 1 (Fragment) OS=Homo sapiens GN=APOH PE=2 SV=1

Match to Query 6284: 1468.735208 from(735.374880,2+) intensity(94156.0234) rtinseconds(506) scans(1013) index(26430)

Title: 111019\_Est\_MI\_YS\_G\_09Spectrum843\_scans\_\_1013

Data file C:\\mascot\\20140703\_Tmgf\_1D\\CSV\_UseAnalysis\\MasterCSV\\All\_Glyco\\mgf\\ptm\\UC18ERLIC\_PTM\_35D.mgf

Click mouse within plot area to zoom in by factor of two about that point

Or, to Da

Label all possible matches Label matches used for scoring

Show Y-axis

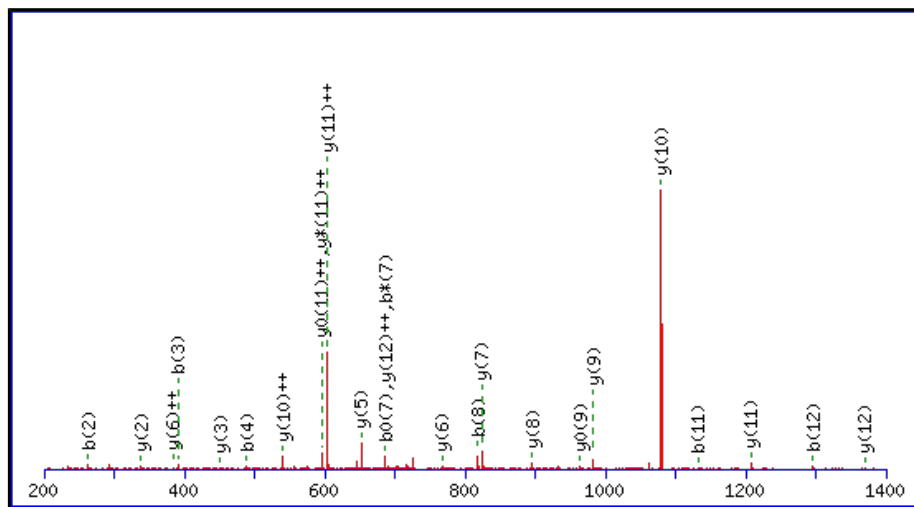

Monoisotopic mass of neutral peptide Mr(calc): 1468.7310

Fixed modifications: Carbamidomethyl (C) (apply to specified residues or termini only)

Variable modifications:

N8 : Deamidated (NQ)

Ions Score: 76 Expect: 5.7e-006

Matches : 25/126 fragment ions using 36 most intense peaks ([help](#))

| #  | b                | b <sup>++</sup> | b <sup>*</sup>  | b <sup>***</sup> | b <sup>0</sup>  | b <sup>0++</sup> | Seq. | y                | y <sup>++</sup> | y <sup>*</sup> | y <sup>***</sup> | y <sup>0</sup>  | y <sup>0++</sup> | #  |
|----|------------------|-----------------|-----------------|------------------|-----------------|------------------|------|------------------|-----------------|----------------|------------------|-----------------|------------------|----|
| 1  | 100.0757         | 50.5415         |                 |                  |                 |                  | V    |                  |                 |                |                  |                 |                  | 13 |
| 2  | <b>263.1390</b>  | 132.0731        |                 |                  |                 |                  | Y    | <b>1370.6699</b> | <b>685.8386</b> | 1353.6434      | 677.3253         | 1352.6593       | 676.8333         | 12 |
| 3  | <b>391.2340</b>  | 196.1206        | 374.2074        | 187.6074         |                 |                  | K    | <b>1207.6066</b> | <b>604.3069</b> | 1190.5800      | <b>595.7937</b>  | 1189.5960       | <b>595.3016</b>  | 11 |
| 4  | <b>488.2867</b>  | 244.6470        | 471.2602        | 236.1337         |                 |                  | P    | <b>1079.5116</b> | <b>540.2594</b> | 1062.4851      | 531.7462         | 1061.5010       | 531.2542         | 10 |
| 5  | 575.3188         | 288.1630        | 558.2922        | 279.6498         | 557.3082        | 279.1577         | S    | <b>982.4588</b>  | 491.7331        | 965.4323       | 483.2198         | <b>964.4483</b> | 482.7278         | 9  |
| 6  | 646.3559         | 323.6816        | 629.3293        | 315.1683         | 628.3453        | 314.6763         | A    | <b>895.4268</b>  | 448.2170        | 878.4003       | 439.7038         | 877.4163        | 439.2118         | 8  |
| 7  | 703.3774         | 352.1923        | <b>686.3508</b> | 343.6790         | <b>685.3668</b> | 343.1870         | G    | <b>824.3897</b>  | 412.6985        | 807.3632       | 404.1852         | 806.3791        | 403.6932         | 7  |
| 8  | <b>818.4043</b>  | 409.7058        | 801.3777        | 401.1925         | 800.3937        | 400.7005         | N    | <b>767.3682</b>  | <b>384.1878</b> | 750.3417       | 375.6745         | 749.3577        | 375.1825         | 6  |
| 9  | 932.4472         | 466.7272        | 915.4207        | 458.2140         | 914.4367        | 457.7220         | N    | <b>652.3413</b>  | 326.6743        | 635.3148       | 318.1610         | 634.3307        | 317.6690         | 5  |
| 10 | 1019.4793        | 510.2433        | 1002.4527       | 501.7300         | 1001.4687       | 501.2380         | S    | 538.2984         | 269.6528        | 521.2718       | 261.1396         | 520.2878        | 260.6475         | 4  |
| 11 | <b>1132.5633</b> | 566.7853        | 1115.5368       | 558.2720         | 1114.5527       | 557.7800         | L    | <b>451.2663</b>  | 226.1368        | 434.2398       | 217.6235         |                 |                  | 3  |
| 12 | <b>1295.6266</b> | 648.3170        | 1278.6001       | 639.8037         | 1277.6161       | 639.3117         | Y    | <b>338.1823</b>  | 169.5948        | 321.1557       | 161.0815         |                 |                  | 2  |
| 13 |                  |                 |                 |                  |                 |                  | R    | 175.1190         | 88.0631         | 158.0924       | 79.5498          |                 |                  | 1  |

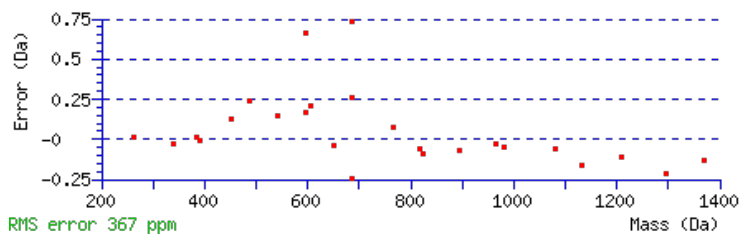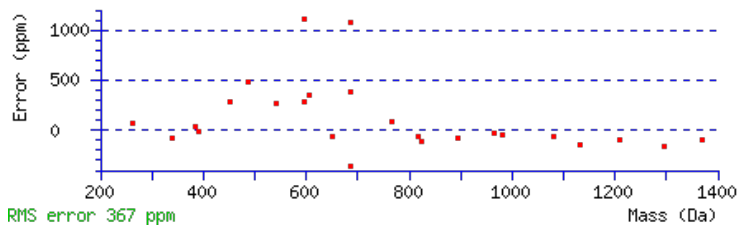

NCBI BLAST search of [VYKPSAGNNSLYR](#)

(Parameters: blastp, nr protein database, expect=20000, no filter, PAM30)

Other BLAST [web gateways](#)

**All matches to this query**

| Score | Mr(calc)  | Delta   | Sequence                      | Site Analysis        |
|-------|-----------|---------|-------------------------------|----------------------|
| 75.7  | 1468.7310 | 0.0042  | <a href="#">VYKPSAGNNSLYR</a> | Deamidated N8 62.72% |
| 73.5  | 1468.7310 | 0.0042  | <a href="#">VYKPSAGNNSLYR</a> | Deamidated N9 37.28% |
| 14.3  | 1468.7378 | -0.0026 | <a href="#">VKSLMASLTNMSR</a> |                      |
| 13.3  | 1468.7422 | -0.0070 | <a href="#">NKEPKLHNEDAR</a>  |                      |
| 12.1  | 1467.7252 | 1.0100  | <a href="#">MEQNKTAATRYR</a>  |                      |
| 11.7  | 1467.7245 | 1.0107  | <a href="#">AYQKOPTIFQNK</a>  |                      |
| 11.6  | 1467.7245 | 1.0107  | <a href="#">AYQKOPTIFQNK</a>  |                      |
| 10.2  | 1468.7409 | -0.0057 | <a href="#">VHQLEKTLQDK</a>   |                      |
| 9.6   | 1468.7310 | 0.0042  | <a href="#">VARNKFYAEQDK</a>  |                      |
| 8.6   | 1467.7279 | 1.0073  | <a href="#">MNQLTQELFSLK</a>  |                      |

Mascot: <http://www.matrixscience.com/>

# MASCOT SCIENCE Mascot Search Results

## Peptide View

MS/MS Fragmentation of **DTAVFECLPQHAMFGNDTITCTTHGNWTKLPECR**

Found in **J3QLI0** in **con\_Xuniprot\_HUMAN3**, J3QLI0\_HUMAN Beta-2-glycoprotein 1 (Fragment) OS=Homo sapiens GN=APOH PE=2 SV=1

Match to Query 28303: 4008.770856 from(1003.199990,4+) intensity(86767.2891) rtinseconds(1969) scans(4945) index(23368)

Title: 111019\_Est\_MI\_YS\_G\_04Spectrum4264\_scans\_\_4945

Data file C:\mascot\20140703\_Tmgef\_1D\CSV\_UseAnalysis\MasterCSV\All\_Glyco\mgf\ptm\UC18ERLIC\_PTM\_35D.mgf

Click mouse within plot area to zoom in by factor of two about that point

Or, to Da

Label all possible matches Label matches used for scoring

Show Y-axis

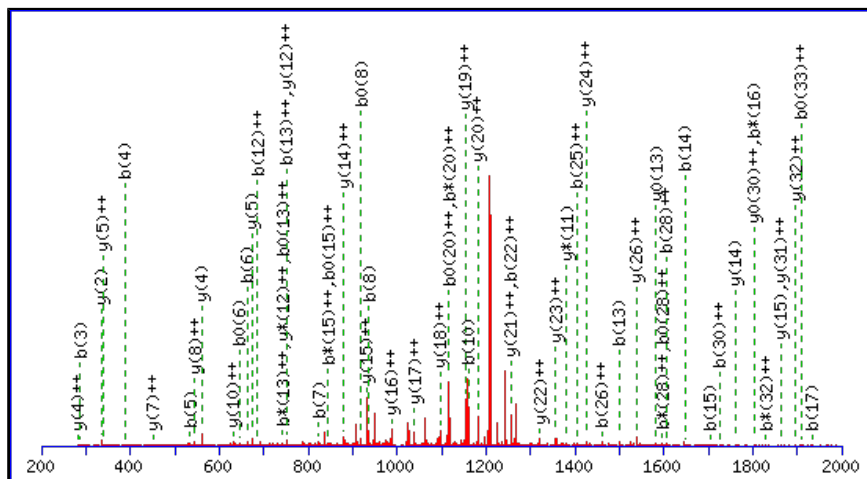

Monoisotopic mass of neutral peptide Mr(calc): 4008.7540

Fixed modifications: Carbamidomethyl (C) (apply to specified residues or termini only)

Variable modifications:

N16 : Deamidated (NQ)

N26 : Deamidated (NQ)

Ions Score: 73 Expect: 5.1e-006

Matches : 60/374 fragment ions using 137 most intense peaks ([help](#))

| #  | b                | b <sup>++</sup>  | b <sup>*</sup>   | b <sup>*++</sup> | b <sup>0</sup>  | b <sup>0++</sup> | Seq. | y                | y <sup>++</sup>  | y <sup>*</sup> | y <sup>*++</sup> | y <sup>0</sup>   | y <sup>0++</sup> | #  |
|----|------------------|------------------|------------------|------------------|-----------------|------------------|------|------------------|------------------|----------------|------------------|------------------|------------------|----|
| 1  | 116.0342         | 58.5207          |                  |                  | 98.0237         | 49.5155          | D    |                  |                  |                |                  |                  |                  | 34 |
| 2  | 217.0819         | 109.0446         |                  |                  | 199.0713        | 100.0393         | T    | 3894.7343        | 1947.8708        | 3877.7077      | 1939.3575        | 3876.7237        | 1938.8655        | 33 |
| 3  | <b>288.1190</b>  | 144.5631         |                  |                  | 270.1084        | 135.5579         | A    | 3793.6866        | <b>1897.3469</b> | 3776.6600      | 1888.8337        | 3775.6760        | 1888.3417        | 32 |
| 4  | <b>387.1874</b>  | 194.0974         |                  |                  | 369.1769        | 185.0921         | V    | 3722.6495        | <b>1861.8284</b> | 3705.6229      | 1853.3151        | 3704.6389        | 1852.8231        | 31 |
| 5  | <b>534.2558</b>  | 267.6316         |                  |                  | 516.2453        | 258.6263         | F    | 3623.5811        | 1812.2942        | 3606.5545      | 1803.7809        | 3605.5705        | <b>1803.2889</b> | 30 |
| 6  | <b>663.2984</b>  | 332.1529         |                  |                  | <b>645.2879</b> | 323.1476         | E    | 3476.5126        | 1738.7600        | 3459.4861      | 1730.2467        | 3458.5021        | 1729.7547        | 29 |
| 7  | <b>823.3291</b>  | 412.1682         |                  |                  | 805.3185        | 403.1629         | C    | 3347.4701        | 1674.2387        | 3330.4435      | 1665.7254        | 3329.4595        | 1665.2334        | 28 |
| 8  | <b>936.4131</b>  | 468.7102         |                  |                  | <b>918.4026</b> | 459.7049         | L    | 3187.4394        | 1594.2233        | 3170.4129      | 1585.7101        | 3169.4288        | 1585.2181        | 27 |
| 9  | 1033.4659        | 517.2366         |                  |                  | 1015.4553       | 508.2313         | P    | 3074.3553        | <b>1537.6813</b> | 3057.3288      | 1529.1680        | 3056.3448        | 1528.6760        | 26 |
| 10 | <b>1161.5245</b> | 581.2659         | 1144.4979        | 572.7526         | 1143.5139       | 572.2606         | Q    | 2977.3026        | 1489.1549        | 2960.2760      | 1480.6417        | 2959.2920        | 1480.1496        | 25 |
| 11 | 1298.5834        | 649.7953         | 1281.5569        | 641.2821         | 1280.5728       | 640.7901         | H    | 2849.2440        | <b>1425.1256</b> | 2832.2175      | 1416.6124        | 2831.2334        | 1416.1204        | 24 |
| 12 | 1369.6205        | <b>685.3139</b>  | 1352.5940        | 676.8006         | 1351.6099       | 676.3086         | A    | 2712.1851        | <b>1356.5962</b> | 2695.1585      | 1348.0829        | 2694.1745        | 1347.5909        | 23 |
| 13 | <b>1500.6610</b> | <b>750.8341</b>  | 1483.6345        | <b>742.3209</b>  | 1482.6504       | <b>741.8289</b>  | M    | 2641.1480        | <b>1321.0776</b> | 2624.1214      | 1312.5644        | 2623.1374        | 1312.0723        | 22 |
| 14 | <b>1647.7294</b> | 824.3683         | 1630.7029        | 815.8551         | 1629.7188       | 815.3631         | F    | 2510.1075        | <b>1255.5574</b> | 2493.0809      | 1247.0441        | 2492.0969        | 1246.5521        | 21 |
| 15 | <b>1704.7509</b> | 852.8791         | 1687.7243        | <b>844.3658</b>  | 1686.7403       | <b>843.8738</b>  | G    | 2363.0391        | <b>1182.0232</b> | 2346.0125      | 1173.5099        | 2345.0285        | 1173.0179        | 20 |
| 16 | 1819.7778        | 910.3925         | <b>1802.7513</b> | 901.8793         | 1801.7673       | 901.3873         | N    | 2306.0176        | <b>1153.5124</b> | 2288.9911      | 1144.9992        | 2288.0070        | 1144.5072        | 19 |
| 17 | <b>1934.8048</b> | 967.9060         | 1917.7782        | 959.3927         | 1916.7942       | 958.9007         | D    | 2190.9907        | <b>1095.9990</b> | 2173.9641      | 1087.4857        | 2172.9801        | 1086.9937        | 18 |
| 18 | 2035.8524        | 1018.4299        | 2018.8259        | 1009.9166        | 2017.8419       | 1009.4246        | T    | 2075.9637        | <b>1038.4855</b> | 2058.9372      | 1029.9722        | 2057.9532        | 1029.4802        | 17 |
| 19 | 2148.9365        | 1074.9719        | 2131.9100        | 1066.4586        | 2130.9259       | 1065.9666        | I    | 1974.9160        | <b>987.9617</b>  | 1957.8895      | 979.4484         | 1956.9055        | 978.9564         | 16 |
| 20 | 2249.9842        | 1125.4957        | 2232.9576        | <b>1116.9825</b> | 2231.9736       | <b>1116.4904</b> | T    | <b>1861.8320</b> | <b>931.4196</b>  | 1844.8054      | 922.9064         | 1843.8214        | 922.4143         | 15 |
| 21 | 2410.0148        | 1205.5111        | 2392.9883        | 1196.9978        | 2392.0043       | 1196.5058        | C    | <b>1760.7843</b> | <b>880.8958</b>  | 1743.7578      | 872.3825         | 1742.7737        | 871.8905         | 14 |
| 22 | 2511.0625        | <b>1256.0349</b> | 2494.0360        | 1247.5216        | 2493.0519       | 1247.0296        | T    | 1600.7537        | 800.8805         | 1583.7271      | 792.3672         | <b>1582.7431</b> | 791.8752         | 13 |

|    |           |           |           |           |           |           |   |           |          |           |          |           |          |    |
|----|-----------|-----------|-----------|-----------|-----------|-----------|---|-----------|----------|-----------|----------|-----------|----------|----|
| 23 | 2612.1102 | 1306.5587 | 2595.0836 | 1298.0455 | 2594.0996 | 1297.5535 | T | 1499.7060 | 750.3566 | 1482.6794 | 741.8434 | 1481.6954 | 741.3513 | 12 |
| 24 | 2749.1691 | 1375.0882 | 2732.1426 | 1366.5749 | 2731.1585 | 1366.0829 | H | 1398.6583 | 699.8328 | 1381.6317 | 691.3195 | 1380.6477 | 690.8275 | 11 |
| 25 | 2806.1906 | 1403.5989 | 2789.1640 | 1395.0856 | 2788.1800 | 1394.5936 | G | 1261.5994 | 631.3033 | 1244.5728 | 622.7901 | 1243.5888 | 622.2980 | 10 |
| 26 | 2921.2175 | 1461.1124 | 2904.1910 | 1452.5991 | 2903.2069 | 1452.1071 | N | 1204.5779 | 602.7926 | 1187.5514 | 594.2793 | 1186.5674 | 593.7873 | 9  |
| 27 | 3107.2968 | 1554.1520 | 3090.2703 | 1545.6388 | 3089.2863 | 1545.1468 | W | 1089.5510 | 545.2791 | 1072.5244 | 536.7659 | 1071.5404 | 536.2738 | 8  |
| 28 | 3208.3445 | 1604.6759 | 3191.3180 | 1596.1626 | 3190.3339 | 1595.6706 | T | 903.4717  | 452.2395 | 886.4451  | 443.7262 | 885.4611  | 443.2342 | 7  |
| 29 | 3336.4395 | 1668.7234 | 3319.4129 | 1660.2101 | 3318.4289 | 1659.7181 | K | 802.4240  | 401.7156 | 785.3974  | 393.2024 | 784.4134  | 392.7103 | 6  |
| 30 | 3449.5235 | 1725.2654 | 3432.4970 | 1716.7521 | 3431.5130 | 1716.2601 | L | 674.3290  | 337.6681 | 657.3025  | 329.1549 | 656.3185  | 328.6629 | 5  |
| 31 | 3546.5763 | 1773.7918 | 3529.5497 | 1765.2785 | 3528.5657 | 1764.7865 | P | 561.2450  | 281.1261 | 544.2184  | 272.6128 | 543.2344  | 272.1208 | 4  |
| 32 | 3675.6189 | 1838.3131 | 3658.5923 | 1829.7998 | 3657.6083 | 1829.3078 | E | 464.1922  | 232.5997 | 447.1656  | 224.0865 | 446.1816  | 223.5945 | 3  |
| 33 | 3835.6495 | 1918.3284 | 3818.6230 | 1909.8151 | 3817.6390 | 1909.3231 | C | 335.1496  | 168.0784 | 318.1231  | 159.5652 |           |          | 2  |
| 34 |           |           |           |           |           |           | R | 175.1190  | 88.0631  | 158.0924  | 79.5498  |           |          | 1  |

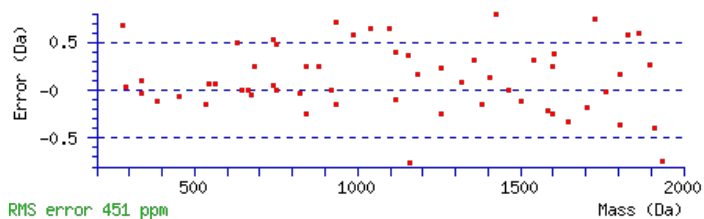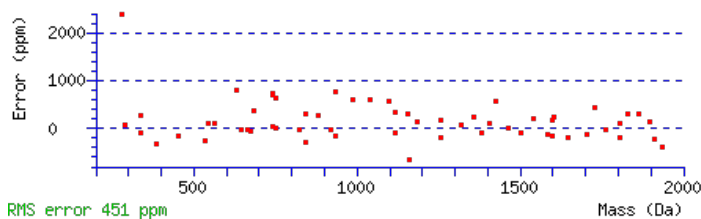

NCBI BLAST search of [DTAVFECLPQHAMEFGNDTITCTTHGNWTKLPECR](#)

(Parameters: blastp, nr protein database, expect=20000, no filter, PAM30)

Other BLAST [web gateways](#)

All matches to this query

| Score | Mr(calc)  | Delta  | Sequence                                            | Site Analysis              |
|-------|-----------|--------|-----------------------------------------------------|----------------------------|
| 72.9  | 4008.7540 | 0.0169 | <a href="#">DTAVFECLPQHAMEFGNDTITCTTHGNWTKLPECR</a> | Deamidated N16, N26 99.60% |
| 48.9  | 4008.7540 | 0.0169 | <a href="#">DTAVFECLPQHAMEFGNDTITCTTHGNWTKLPECR</a> | Deamidated Q10, N26 0.40%  |
| 48.6  | 4007.7699 | 1.0009 | <a href="#">DTAVFECLPQHAMEFGNDTITCTTHGNWTKLPECR</a> |                            |
| 25.1  | 4007.7699 | 1.0009 | <a href="#">DTAVFECLPQHAMEFGNDTITCTTHGNWTKLPECR</a> |                            |
| 21.1  | 4008.7540 | 0.0169 | <a href="#">DTAVFECLPQHAMEFGNDTITCTTHGNWTKLPECR</a> | Deamidated Q10, N16 0.00%  |
| 11.7  | 4007.7699 | 1.0009 | <a href="#">DTAVFECLPQHAMEFGNDTITCTTHGNWTKLPECR</a> |                            |
| 8.9   | 4007.7711 | 0.9998 | <a href="#">AVEMTDQLMVPTLGSQEGAFENVRMNYSGDQGQTR</a> |                            |
| 6.3   | 4008.7551 | 0.0158 | <a href="#">AVEMTDQLMVPTLGSQEGAFENVRMNYSGDQGQTR</a> |                            |
| 4.7   | 4006.7717 | 1.9991 | <a href="#">NLHSHYHEAPMTRKHYQVTGYGINGTGDSNDFWR</a>  |                            |
| 4.2   | 4007.7711 | 0.9998 | <a href="#">AVEMTDQLMVPTLGSQEGAFENVRMNYSGDQGQTR</a> |                            |

Mascot: <http://www.matrixscience.com/>

# MATRIX SCIENCE Mascot Search Results

## Peptide View

MS/MS Fragmentation of **DTAVFECLPQHAMFGNDTITCTTHGNWTKLPECR**

Found in **J3QLI0** in **con\_Xuniprot\_HUMAN3**, J3QLI0\_HUMAN Beta-2-glycoprotein 1 (Fragment) OS=Homo sapiens GN=APOH PE=2 SV=1

Match to Query 28313: 4008.776376 from(1003.201370,4+) intensity(64177.7578) rtinseconds(1912) scans(4889) index(22693)

Title: 111019\_Est\_ML\_YS\_G\_03Spectrum4276\_scans\_\_4889

Data file C:\mascot\20140703\_Tmgf\_1D\CSV\_UseAnalysis\MasterCSV\All\_Glyco\mgf\ptm\UC18ERLIC\_PTM\_35D.mgf

Click mouse within plot area to zoom in by factor of two about that point

Or,  to  Da

Label all possible matches  Label matches used for scoring

Show Y-axis

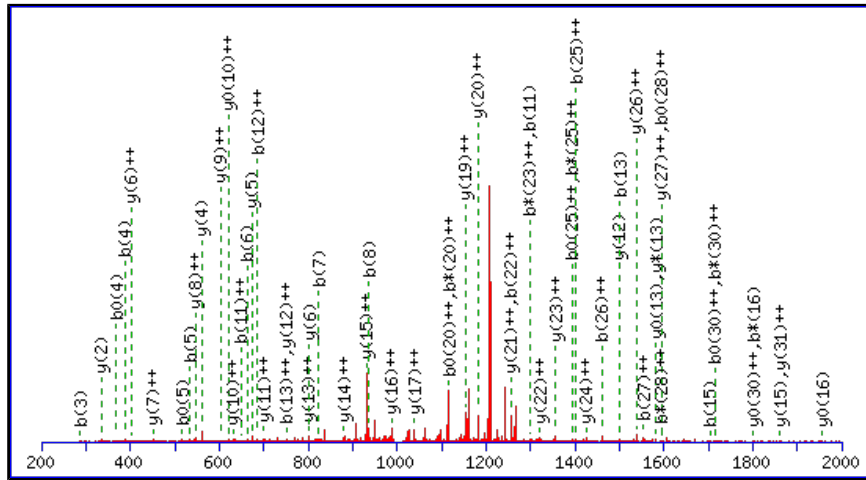

Monoisotopic mass of neutral peptide Mr(calc): 4007.7699

Fixed modifications: Carbamidomethyl (C) (apply to specified residues or termini only)

Variable modifications:

N26 : Deamidated (NQ)

Ions Score: 67 Expect: 2e-005

Matches : 60/374 fragment ions using 154 most intense peaks ([help](#))

| #  | b                | b <sup>++</sup>  | b <sup>*</sup>   | b <sup>*++</sup> | b <sup>0</sup>  | b <sup>0++</sup> | Seq. | y                | y <sup>++</sup>  | y <sup>*</sup>   | y <sup>*++</sup> | y <sup>0</sup>   | y <sup>0++</sup> | #  |
|----|------------------|------------------|------------------|------------------|-----------------|------------------|------|------------------|------------------|------------------|------------------|------------------|------------------|----|
| 1  | 116.0342         | 58.5207          |                  |                  | 98.0237         | 49.5155          | D    |                  |                  |                  |                  |                  |                  | 34 |
| 2  | 217.0819         | 109.0446         |                  |                  | 199.0713        | 100.0393         | T    | 3893.7503        | 1947.3788        | 3876.7237        | 1938.8655        | 3875.7397        | 1938.3735        | 33 |
| 3  | <b>288.1190</b>  | 144.5631         |                  |                  | 270.1084        | 135.5579         | A    | 3792.7026        | 1896.8549        | 3775.6760        | 1888.3417        | 3774.6920        | 1887.8496        | 32 |
| 4  | <b>387.1874</b>  | 194.0974         |                  |                  | <b>369.1769</b> | 185.0921         | V    | 3721.6655        | <b>1861.3364</b> | 3704.6389        | 1852.8231        | 3703.6549        | 1852.3311        | 31 |
| 5  | <b>534.2558</b>  | 267.6316         |                  |                  | <b>516.2453</b> | 258.6263         | F    | 3622.5970        | 1811.8022        | 3605.5705        | 1803.2889        | 3604.5865        | <b>1802.7969</b> | 30 |
| 6  | <b>663.2984</b>  | 332.1529         |                  |                  | 645.2879        | 323.1476         | E    | 3475.5286        | 1738.2680        | 3458.5021        | 1729.7547        | 3457.5181        | 1729.2627        | 29 |
| 7  | <b>823.3291</b>  | 412.1682         |                  |                  | 805.3185        | 403.1629         | C    | 3346.4860        | 1673.7467        | 3329.4595        | 1665.2334        | 3328.4755        | 1664.7414        | 28 |
| 8  | <b>936.4131</b>  | 468.7102         |                  |                  | 918.4026        | 459.7049         | L    | 3186.4554        | <b>1593.7313</b> | 3169.4288        | 1585.2181        | 3168.4448        | 1584.7261        | 27 |
| 9  | 1033.4659        | 517.2366         |                  |                  | 1015.4553       | 508.2313         | P    | 3073.3713        | <b>1537.1893</b> | 3056.3448        | 1528.6760        | 3055.3608        | 1528.1840        | 26 |
| 10 | 1161.5245        | 581.2659         | 1144.4979        | 572.7526         | 1143.5139       | 572.2606         | Q    | 2976.3186        | 1488.6629        | 2959.2920        | 1480.1496        | 2958.3080        | 1479.6576        | 25 |
| 11 | <b>1298.5834</b> | <b>649.7953</b>  | 1281.5569        | 641.2821         | 1280.5728       | 640.7901         | H    | 2848.2600        | <b>1424.6336</b> | 2831.2334        | 1416.1204        | 2830.2494        | 1415.6283        | 24 |
| 12 | 1369.6205        | <b>685.3139</b>  | 1352.5940        | 676.8006         | 1351.6099       | 676.3086         | A    | 2711.2011        | <b>1356.1042</b> | 2694.1745        | 1347.5909        | 2693.1905        | 1347.0989        | 23 |
| 13 | <b>1500.6610</b> | <b>750.8341</b>  | 1483.6345        | 742.3209         | 1482.6504       | 741.8289         | M    | 2640.1640        | <b>1320.5856</b> | 2623.1374        | 1312.0723        | 2622.1534        | 1311.5803        | 22 |
| 14 | 1647.7294        | 824.3683         | 1630.7029        | 815.8551         | 1629.7188       | 815.3631         | F    | 2509.1235        | <b>1255.0654</b> | 2492.0969        | 1246.5521        | 2491.1129        | 1246.0601        | 21 |
| 15 | <b>1704.7509</b> | 852.8791         | 1687.7243        | 844.3658         | 1686.7403       | 843.8738         | G    | 2362.0551        | <b>1181.5312</b> | 2345.0285        | 1173.0179        | 2344.0445        | 1172.5259        | 20 |
| 16 | 1818.7938        | 909.9005         | <b>1801.7673</b> | 901.3873         | 1800.7832       | 900.8953         | N    | 2305.0336        | <b>1153.0204</b> | 2288.0070        | 1144.5072        | 2287.0230        | 1144.0152        | 19 |
| 17 | 1933.8207        | 967.4140         | 1916.7942        | 958.9007         | 1915.8102       | 958.4087         | D    | 2190.9907        | 1095.9990        | 2173.9641        | 1087.4857        | 2172.9801        | 1086.9937        | 18 |
| 18 | 2034.8684        | 1017.9379        | 2017.8419        | 1009.4246        | 2016.8579       | 1008.9326        | T    | 2075.9637        | <b>1038.4855</b> | 2058.9372        | 1029.9722        | 2057.9532        | 1029.4802        | 17 |
| 19 | 2147.9525        | 1074.4799        | 2130.9259        | 1065.9666        | 2129.9419       | 1065.4746        | I    | 1974.9160        | <b>987.9617</b>  | 1957.8895        | 979.4484         | <b>1956.9055</b> | 978.9564         | 16 |
| 20 | 2249.0002        | 1125.0037        | 2231.9736        | <b>1116.4904</b> | 2230.9896       | <b>1115.9984</b> | T    | <b>1861.8320</b> | <b>931.4196</b>  | 1844.8054        | 922.9064         | 1843.8214        | 922.4143         | 15 |
| 21 | 2409.0308        | 1205.0190        | 2392.0043        | 1196.5058        | 2391.0203       | 1196.0138        | C    | 1760.7843        | <b>880.8958</b>  | 1743.7578        | 872.3825         | 1742.7737        | 871.8905         | 14 |
| 22 | 2510.0785        | <b>1255.5429</b> | 2493.0519        | 1247.0296        | 2492.0679       | 1246.5376        | T    | 1600.7537        | <b>800.8805</b>  | <b>1583.7271</b> | 792.3672         | <b>1582.7431</b> | 791.8752         | 13 |
| 23 | 2611.1262        | 1306.0667        | 2594.0996        | <b>1297.5535</b> | 2593.1156       | 1297.0614        | T    | <b>1499.7060</b> | <b>750.3566</b>  | 1482.6794        | 741.8434         | 1481.6954        | 741.3513         | 12 |



|    |           |           |           |           |           |           |   |           |          |           |          |           |          |    |
|----|-----------|-----------|-----------|-----------|-----------|-----------|---|-----------|----------|-----------|----------|-----------|----------|----|
| 24 | 2748.1851 | 1374.5962 | 2731.1585 | 1366.0829 | 2730.1745 | 1365.5909 | H | 1398.6583 | 699.8328 | 1381.6317 | 691.3195 | 1380.6477 | 690.8275 | 11 |
| 25 | 2805.2066 | 1403.1069 | 2788.1800 | 1394.5936 | 2787.1960 | 1394.1016 | G | 1261.5994 | 631.3033 | 1244.5728 | 622.7901 | 1243.5888 | 622.2980 | 10 |
| 26 | 2920.2335 | 1460.6204 | 2903.2069 | 1452.1071 | 2902.2229 | 1451.6151 | N | 1204.5779 | 602.7926 | 1187.5514 | 594.2793 | 1186.5674 | 593.7873 | 9  |
| 27 | 3106.3128 | 1553.6600 | 3089.2863 | 1545.1468 | 3088.3022 | 1544.6548 | W | 1089.5510 | 545.2791 | 1072.5244 | 536.7659 | 1071.5404 | 536.2738 | 8  |
| 28 | 3207.3605 | 1604.1839 | 3190.3339 | 1595.6706 | 3189.3499 | 1595.1786 | T | 903.4717  | 452.2395 | 886.4451  | 443.7262 | 885.4611  | 443.2342 | 7  |
| 29 | 3335.4554 | 1668.2314 | 3318.4289 | 1659.7181 | 3317.4449 | 1659.2261 | K | 802.4240  | 401.7156 | 785.3974  | 393.2024 | 784.4134  | 392.7103 | 6  |
| 30 | 3448.5395 | 1724.7734 | 3431.5130 | 1716.2601 | 3430.5289 | 1715.7681 | L | 674.3290  | 337.6681 | 657.3025  | 329.1549 | 656.3185  | 328.6629 | 5  |
| 31 | 3545.5923 | 1773.2998 | 3528.5657 | 1764.7865 | 3527.5817 | 1764.2945 | P | 561.2450  | 281.1261 | 544.2184  | 272.6128 | 543.2344  | 272.1208 | 4  |
| 32 | 3674.6349 | 1837.8211 | 3657.6083 | 1829.3078 | 3656.6243 | 1828.8158 | E | 464.1922  | 232.5997 | 447.1656  | 224.0865 | 446.1816  | 223.5945 | 3  |
| 33 | 3834.6655 | 1917.8364 | 3817.6390 | 1909.3231 | 3816.6550 | 1908.8311 | C | 335.1496  | 168.0784 | 318.1231  | 159.5652 |           |          | 2  |
| 34 |           |           |           |           |           |           | R | 175.1190  | 88.0631  | 158.0924  | 79.5498  |           |          | 1  |

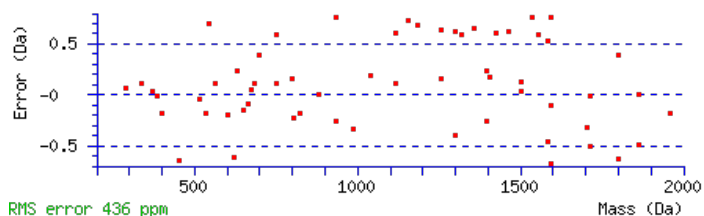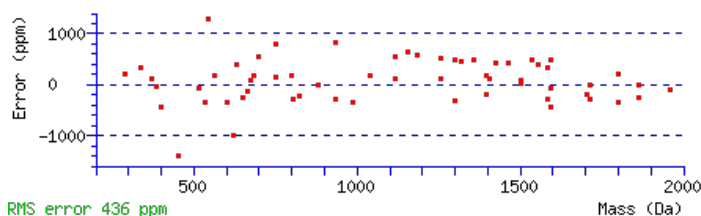

NCBI BLAST search of [DTAVFECLPQHAMEFGNDTITCTTHGNWTKLPECR](#)

(Parameters: blastp, nr protein database, expect=20000, no filter, PAM30)

Other BLAST [web gateways](#)

All matches to this query

| Score | Mr(calc)  | Delta  | Sequence                                            | Site Analysis         |
|-------|-----------|--------|-----------------------------------------------------|-----------------------|
| 67.1  | 4007.7699 | 1.0064 | <a href="#">DTAVFECLPQHAMEFGNDTITCTTHGNWTKLPECR</a> | Deamidated N26 97.86% |
| 50.5  | 4007.7699 | 1.0064 | <a href="#">DTAVFECLPQHAMEFGNDTITCTTHGNWTKLPECR</a> | Deamidated N16 2.13%  |
| 26.8  | 4007.7699 | 1.0064 | <a href="#">DTAVFECLPQHAMEFGNDTITCTTHGNWTKLPECR</a> | Deamidated Q10 0.01%  |
| 19.4  | 4006.7859 | 1.9904 | <a href="#">DTAVFECLPQHAMEFGNDTITCTTHGNWTKLPECR</a> |                       |
| 9.3   | 4006.7740 | 2.0024 | <a href="#">YYAVPDGEKQMYIPNQCMTQGVPPPIYNYVHGDTK</a> |                       |
| 6.8   | 4006.7749 | 2.0015 | <a href="#">DTNDDPDEDHLTSYDIQLSIQESIEASKTALCPER</a> |                       |
| 6.8   | 4006.7749 | 2.0015 | <a href="#">DTNDDPDEDHLTSYDIQLSIQESIEASKTALCPER</a> |                       |
| 6.6   | 4006.7738 | 2.0026 | <a href="#">SEHVQHSPKQFQLHQDVTGQSQGONMEVQYMQSK</a>  |                       |
| 5.6   | 4007.7578 | 1.0186 | <a href="#">SEHVQHSPKQFQLHQDVTGQSQGONMEVQYMQSK</a>  |                       |
| 5.5   | 4006.7699 | 2.0064 | <a href="#">QFQSFCCSLSELFMSSFQSYGAPRGDKEELTPQK</a>  |                       |

Mascot: <http://www.matrixscience.com/>

# MATRIX SCIENCE Mascot Search Results

## Peptide View

MS/MS Fragmentation of **DTAVFECLPQHAMFGNDTITCTTHGNWTK**

Found in **J3QLI0** in **con\_Xuniprot\_HUMAN3**, J3QLI0\_HUMAN Beta-2-glycoprotein 1 (Fragment) OS=Homo sapiens GN=APOH PE=2 SV=1

Match to Query 27557: 3369.441792 from(1124.154540,3+) intensity(20308.2070) rtinseconds(1641) scans(4128) index(26686)

Title: 111019\_Est\_MI\_YS\_G\_09Spectrum3579\_scans\_\_4128

Data file C:\mascot\20140703\_Tmgf\_1D\CSV\_UseAnalysis\MasterCSV\All\_Glyco\mgf\ptm\UC18ERLIC\_PTM\_35D.mgf

Click mouse within plot area to zoom in by factor of two about that point

Or, to Da

Label all possible matches Label matches used for scoring

Show Y-axis

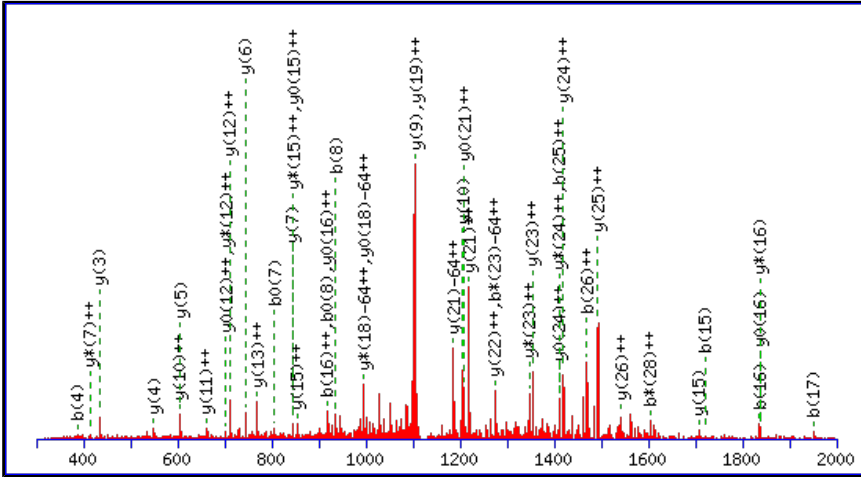

Monoisotopic mass of neutral peptide Mr(calc): 3369.4377

Fixed modifications: Carbamidomethyl (C) (apply to specified residues or termini only)

Variable modifications:

M13 : Oxidation (M), with neutral losses 0.0000 (shown in table), 63.9983

N16 : Deamidated (NQ)

N26 : Deamidated (NQ)

Ions Score: 67 Expect: 1.2e-005

Matches : 47/484 fragment ions using 68 most intense peaks ([help](#))

| #  | b                | b <sup>++</sup> | b <sup>*</sup> | b <sup>*++</sup> | b <sup>0</sup>  | b <sup>0++</sup> | Seq. | y                | y <sup>++</sup>  | y <sup>*</sup>   | y <sup>*++</sup> | y <sup>0</sup>   | y <sup>0++</sup> | #  |
|----|------------------|-----------------|----------------|------------------|-----------------|------------------|------|------------------|------------------|------------------|------------------|------------------|------------------|----|
| 1  | 116.0342         | 58.5207         |                |                  | 98.0237         | 49.5155          | D    |                  |                  |                  |                  |                  |                  | 29 |
| 2  | 217.0819         | 109.0446        |                |                  | 199.0713        | 100.0393         | T    | 3255.4180        | 1628.2126        | 3238.3915        | 1619.6994        | 3237.4074        | 1619.2074        | 28 |
| 3  | 288.1190         | 144.5631        |                |                  | 270.1084        | 135.5579         | A    | 3154.3703        | 1577.6888        | 3137.3438        | 1569.1755        | 3136.3598        | 1568.6835        | 27 |
| 4  | <b>387.1874</b>  | 194.0974        |                |                  | 369.1769        | 185.0921         | V    | 3083.3332        | <b>1542.1702</b> | 3066.3067        | 1533.6570        | 3065.3226        | 1533.1650        | 26 |
| 5  | 534.2558         | 267.6316        |                |                  | 516.2453        | 258.6263         | F    | 2984.2648        | <b>1492.6360</b> | 2967.2382        | 1484.1228        | 2966.2542        | 1483.6308        | 25 |
| 6  | 663.2984         | 332.1529        |                |                  | 645.2879        | 323.1476         | E    | 2837.1964        | <b>1419.1018</b> | 2820.1698        | <b>1410.5886</b> | 2819.1858        | <b>1410.0965</b> | 24 |
| 7  | 823.3291         | 412.1682        |                |                  | <b>805.3185</b> | 403.1629         | C    | 2708.1538        | <b>1354.5805</b> | 2691.1272        | <b>1346.0673</b> | 2690.1432        | 1345.5752        | 23 |
| 8  | <b>936.4131</b>  | 468.7102        |                |                  | <b>918.4026</b> | 459.7049         | L    | 2548.1231        | <b>1274.5652</b> | 2531.0966        | 1266.0519        | 2530.1126        | 1265.5599        | 22 |
| 9  | 1033.4659        | 517.2366        |                |                  | 1015.4553       | 508.2313         | P    | 2435.0391        | <b>1218.0232</b> | 2418.0125        | 1209.5099        | 2417.0285        | <b>1209.0179</b> | 21 |
| 10 | 1161.5245        | 581.2659        | 1144.4979      | 572.7526         | 1143.5139       | 572.2606         | Q    | 2337.9863        | 1169.4968        | 2320.9598        | 1160.9835        | 2319.9757        | 1160.4915        | 20 |
| 11 | 1298.5834        | 649.7953        | 1281.5569      | 641.2821         | 1280.5728       | 640.7901         | H    | 2209.9277        | <b>1105.4675</b> | 2192.9012        | 1096.9542        | 2191.9172        | 1096.4622        | 19 |
| 12 | 1369.6205        | 685.3139        | 1352.5940      | 676.8006         | 1351.6099       | 676.3086         | A    | 2072.8688        | 1036.9380        | 2055.8423        | 1028.4248        | 2054.8583        | 1027.9328        | 18 |
| 13 | 1516.6559        | 758.8316        | 1499.6294      | 750.3183         | 1498.6453       | 749.8263         | M    | 2001.8317        | 1001.4195        | 1984.8052        | 992.9062         | 1983.8211        | 992.4142         | 17 |
| 14 | 1663.7243        | 832.3658        | 1646.6978      | 823.8525         | 1645.7138       | 823.3605         | F    | 1854.7963        | 927.9018         | <b>1837.7698</b> | 919.3885         | <b>1836.7857</b> | <b>918.8965</b>  | 16 |
| 15 | <b>1720.7458</b> | 860.8765        | 1703.7192      | 852.3633         | 1702.7352       | 851.8713         | G    | <b>1707.7279</b> | <b>854.3676</b>  | 1690.7013        | <b>845.8543</b>  | 1689.7173        | <b>845.3623</b>  | 15 |
| 16 | <b>1835.7727</b> | <b>918.3900</b> | 1818.7462      | 909.8767         | 1817.7622       | 909.3847         | N    | 1650.7064        | 825.8569         | 1633.6799        | 817.3436         | 1632.6959        | 816.8516         | 14 |
| 17 | <b>1950.7997</b> | 975.9035        | 1933.7731      | 967.3902         | 1932.7891       | 966.8982         | D    | 1535.6795        | <b>768.3434</b>  | 1518.6529        | 759.8301         | 1517.6689        | 759.3381         | 13 |
| 18 | 2051.8474        | 1026.4273       | 2034.8208      | 1017.9140        | 2033.8368       | 1017.4220        | T    | 1420.6525        | <b>710.8299</b>  | 1403.6260        | <b>702.3166</b>  | 1402.6420        | <b>701.8246</b>  | 12 |
| 19 | 2164.9314        | 1082.9693       | 2147.9049      | 1074.4561        | 2146.9209       | 1073.9641        | I    | 1319.6049        | <b>660.3061</b>  | 1302.5783        | 651.7928         | 1301.5943        | 651.3008         | 11 |
| 20 | 2265.9791        | 1133.4932       | 2248.9526      | 1124.9799        | 2247.9685       | 1124.4879        | T    | <b>1206.5208</b> | <b>603.7640</b>  | 1189.4943        | 595.2508         | 1188.5102        | 594.7588         | 10 |
| 21 | 2426.0097        | 1213.5085       | 2408.9832      | 1204.9952        | 2407.9992       | 1204.5032        | C    | <b>1105.4731</b> | 553.2402         | 1088.4466        | 544.7269         | 1087.4626        | 544.2349         | 9  |
| 22 | 2527.0574        | 1264.0324       | 2510.0309      | 1255.5191        | 2509.0469       | 1255.0271        | T    | 945.4425         | 473.2249         | 928.4159         | 464.7116         | 927.4319         | 464.2196         | 8  |

|    |           |           |           |           |           |           |   |          |          |          |          |          |          |   |
|----|-----------|-----------|-----------|-----------|-----------|-----------|---|----------|----------|----------|----------|----------|----------|---|
| 23 | 2628.1051 | 1314.5562 | 2611.0786 | 1306.0429 | 2610.0945 | 1305.5509 | T | 844.3948 | 422.7010 | 827.3682 | 414.1878 | 826.3842 | 413.6958 | 7 |
| 24 | 2765.1640 | 1383.0856 | 2748.1375 | 1374.5724 | 2747.1535 | 1374.0804 | H | 743.3471 | 372.1772 | 726.3206 | 363.6639 | 725.3365 | 363.1719 | 6 |
| 25 | 2822.1855 | 1411.5964 | 2805.1589 | 1403.0831 | 2804.1749 | 1402.5911 | G | 606.2882 | 303.6477 | 589.2617 | 295.1345 | 588.2776 | 294.6425 | 5 |
| 26 | 2937.2124 | 1469.1099 | 2920.1859 | 1460.5966 | 2919.2019 | 1460.1046 | N | 549.2667 | 275.1370 | 532.2402 | 266.6237 | 531.2562 | 266.1317 | 4 |
| 27 | 3123.2917 | 1562.1495 | 3106.2652 | 1553.6362 | 3105.2812 | 1553.1442 | W | 434.2398 | 217.6235 | 417.2132 | 209.1103 | 416.2292 | 208.6183 | 3 |
| 28 | 3224.3394 | 1612.6733 | 3207.3129 | 1604.1601 | 3206.3289 | 1603.6681 | T | 248.1605 | 124.5839 | 231.1339 | 116.0706 | 230.1499 | 115.5786 | 2 |
| 29 |           |           |           |           |           |           | K | 147.1128 | 74.0600  | 130.0863 | 65.5468  |          |          | 1 |

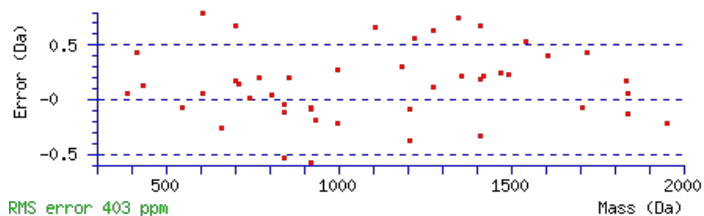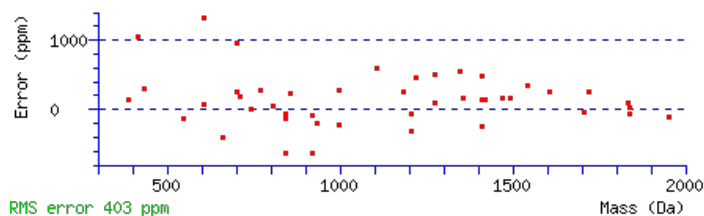

NCBI BLAST search of [DTAVFECLPQHAMFGNDTITCTTHGNWTK](#)  
 (Parameters: blastp, nr protein database, expect=20000, no filter, PAM30)  
 Other BLAST [web gateways](#)

All matches to this query

| Score | Mr(calc)  | Delta   | Sequence                                           | Site Analysis              |
|-------|-----------|---------|----------------------------------------------------|----------------------------|
| 66.9  | 3369.4377 | 0.0041  | <a href="#">DTAVFECLPQHAMFGNDTITCTTHGNWTK</a>      | Deamidated N16, N26 68.03% |
| 63.5  | 3369.4377 | 0.0041  | <a href="#">DTAVFECLPQHAMFGNDTITCTTHGNWTK</a>      | Deamidated Q10, N26 30.81% |
| 49.4  | 3368.4537 | 0.9881  | <a href="#">DTAVFECLPQHAMFGNDTITCTTHGNWTK</a>      |                            |
| 49.3  | 3369.4377 | 0.0041  | <a href="#">DTAVFECLPQHAMFGNDTITCTTHGNWTK</a>      | Deamidated Q10, N16 1.16%  |
| 36.7  | 3368.4537 | 0.9881  | <a href="#">DTAVFECLPQHAMFGNDTITCTTHGNWTK</a>      |                            |
| 29.2  | 3368.4537 | 0.9881  | <a href="#">DTAVFECLPQHAMFGNDTITCTTHGNWTK</a>      |                            |
| 1.4   | 3369.4298 | 0.0120  | <a href="#">DCEYMGLSATTNTGPWGTGLCQMTGLNFLR</a>     |                            |
| 0.9   | 3369.4451 | -0.0033 | <a href="#">MAYNMTEFPNLMGHYDQSIAAVEMEGTQTG</a>     |                            |
| 0.8   | 3369.4429 | -0.0011 | <a href="#">TSDMTSPRSGMPSSSTTNGSLTSSSTAGLTSMCR</a> |                            |

Mascot: <http://www.matrixscience.com/>

# MASCOT SCIENCE Mascot Search Results

## Peptide View

MS/MS Fragmentation of **DTAVFECLPQHAMFGNDTITCTTHGNWTKLPECR**

Found in **J3QLI0** in **con\_Xuniprot\_HUMAN3**, J3QLI0\_HUMAN Beta-2-glycoprotein 1 (Fragment) OS=Homo sapiens GN=APOH PE=2 SV=1

Match to Query 28339: 4025.759082 from(1342.926970,3+) intensity(27981.1387) rtinseconds(1836) scans(4469) index(10204)

Title: 111019\_Est\_ISCardio\_NMI\_YS\_G\_6Spectrum3798\_scans\_\_4469

Data file C:\mascot\20140703\_Tmgf\_1D\CSV\_UseAnalysis\MasterCSV\All\_Glyco\mgf\ptm\UC18ERLIC\_PTM\_35D.mgf

Click mouse within plot area to zoom in by factor of two about that point

Or, to Da

Label all possible matches Label matches used for scoring

Show Y-axis

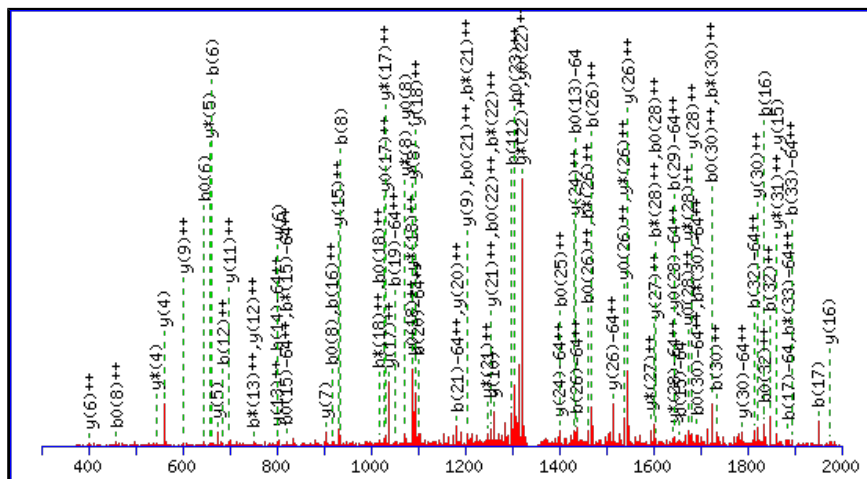

Monoisotopic mass of neutral peptide Mr(calc): 4024.7489

Fixed modifications: Carbamidomethyl (C) (apply to specified residues or termini only)

Variable modifications:

M13 : Oxidation (M), with neutral losses 0.0000 (shown in table), 63.9983

N16 : Deamidated (NQ)

N26 : Deamidated (NQ)

Ions Score: 62 Expect: 5.4e-005

Matches : 91/572 fragment ions using 136 most intense peaks (help)

| #  | b         | b <sup>++</sup> | b <sup>*</sup> | b <sup>*++</sup> | b <sup>0</sup> | b <sup>0++</sup> | Seq. | y         | y <sup>++</sup> | y <sup>*</sup> | y <sup>*++</sup> | y <sup>0</sup> | y <sup>0++</sup> | #  |
|----|-----------|-----------------|----------------|------------------|----------------|------------------|------|-----------|-----------------|----------------|------------------|----------------|------------------|----|
| 1  | 116.0342  | 58.5207         |                |                  | 98.0237        | 49.5155          | D    |           |                 |                |                  |                |                  | 34 |
| 2  | 217.0819  | 109.0446        |                |                  | 199.0713       | 100.0393         | T    | 3910.7292 | 1955.8682       | 3893.7026      | 1947.3550        | 3892.7186      | 1946.8629        | 33 |
| 3  | 288.1190  | 144.5631        |                |                  | 270.1084       | 135.5579         | A    | 3809.6815 | 1905.3444       | 3792.6550      | 1896.8311        | 3791.6709      | 1896.3391        | 32 |
| 4  | 387.1874  | 194.0974        |                |                  | 369.1769       | 185.0921         | V    | 3738.6444 | 1869.8258       | 3721.6178      | 1861.3126        | 3720.6338      | 1860.8206        | 31 |
| 5  | 534.2558  | 267.6316        |                |                  | 516.2453       | 258.6263         | F    | 3639.5760 | 1820.2916       | 3622.5494      | 1811.7784        | 3621.5654      | 1811.2863        | 30 |
| 6  | 663.2984  | 332.1529        |                |                  | 645.2879       | 323.1476         | E    | 3492.5076 | 1746.7574       | 3475.4810      | 1738.2441        | 3474.4970      | 1737.7521        | 29 |
| 7  | 823.3291  | 412.1682        |                |                  | 805.3185       | 403.1629         | C    | 3363.4650 | 1682.2361       | 3346.4384      | 1673.7228        | 3345.4544      | 1673.2308        | 28 |
| 8  | 936.4131  | 468.7102        |                |                  | 918.4026       | 459.7049         | L    | 3203.4343 | 1602.2208       | 3186.4078      | 1593.7075        | 3185.4238      | 1593.2155        | 27 |
| 9  | 1033.4659 | 517.2366        |                |                  | 1015.4553      | 508.2313         | P    | 3090.3503 | 1545.6788       | 3073.3237      | 1537.1655        | 3072.3397      | 1536.6735        | 26 |
| 10 | 1161.5245 | 581.2659        | 1144.4979      | 572.7526         | 1143.5139      | 572.2606         | Q    | 2993.2975 | 1497.1524       | 2976.2709      | 1488.6391        | 2975.2869      | 1488.1471        | 25 |
| 11 | 1298.5834 | 649.7953        | 1281.5569      | 641.2821         | 1280.5728      | 640.7901         | H    | 2865.2389 | 1433.1231       | 2848.2124      | 1424.6098        | 2847.2283      | 1424.1178        | 24 |
| 12 | 1369.6205 | 685.3139        | 1352.5940      | 676.8006         | 1351.6099      | 676.3086         | A    | 2728.1800 | 1364.5936       | 2711.1535      | 1356.0804        | 2710.1694      | 1355.5884        | 23 |
| 13 | 1516.6559 | 758.8316        | 1499.6294      | 750.3183         | 1498.6453      | 749.8263         | M    | 2657.1429 | 1329.0751       | 2640.1163      | 1320.5618        | 2639.1323      | 1320.0698        | 22 |
| 14 | 1663.7243 | 832.3658        | 1646.6978      | 823.8525         | 1645.7138      | 823.3605         | F    | 2510.1075 | 1255.5574       | 2493.0809      | 1247.0441        | 2492.0969      | 1246.5521        | 21 |
| 15 | 1720.7458 | 860.8765        | 1703.7192      | 852.3633         | 1702.7352      | 851.8713         | G    | 2363.0391 | 1182.0232       | 2346.0125      | 1173.5099        | 2345.0285      | 1173.0179        | 20 |
| 16 | 1835.7727 | 918.3900        | 1818.7462      | 909.8767         | 1817.7622      | 909.3847         | N    | 2306.0176 | 1153.5124       | 2288.9911      | 1144.9992        | 2288.0070      | 1144.5072        | 19 |
| 17 | 1950.7997 | 975.9035        | 1933.7731      | 967.3902         | 1932.7891      | 966.8982         | D    | 2190.9907 | 1095.9990       | 2173.9641      | 1087.4857        | 2172.9801      | 1086.9937        | 18 |
| 18 | 2051.8474 | 1026.4273       | 2034.8208      | 1017.9140        | 2033.8368      | 1017.4220        | T    | 2075.9637 | 1038.4855       | 2058.9372      | 1029.9722        | 2057.9532      | 1029.4802        | 17 |
| 19 | 2164.9314 | 1082.9693       | 2147.9049      | 1074.4561        | 2146.9209      | 1073.9641        | I    | 1974.9160 | 987.9617        | 1957.8895      | 979.4484         | 1956.9055      | 978.9564         | 16 |
| 20 | 2265.9791 | 1133.4932       | 2248.9526      | 1124.9799        | 2247.9685      | 1124.4879        | T    | 1861.8320 | 931.4196        | 1844.8054      | 922.9064         | 1843.8214      | 922.4143         | 15 |
| 21 | 2426.0097 | 1213.5085       | 2408.9832      | 1204.9952        | 2407.9992      | 1204.5032        | C    | 1760.7843 | 880.8958        | 1743.7578      | 872.3825         | 1742.7737      | 871.8905         | 14 |
| 22 | 2527.0574 | 1264.0324       | 2510.0309      | 1255.5191        | 2509.0469      | 1255.0271        | T    | 1600.7537 | 800.8805        | 1583.7271      | 792.3672         | 1582.7431      | 791.8752         | 13 |

|    |           |           |           |           |           |           |   |           |          |           |          |           |          |    |
|----|-----------|-----------|-----------|-----------|-----------|-----------|---|-----------|----------|-----------|----------|-----------|----------|----|
| 23 | 2628.1051 | 1314.5562 | 2611.0786 | 1306.0429 | 2610.0945 | 1305.5509 | T | 1499.7060 | 750.3566 | 1482.6794 | 741.8434 | 1481.6954 | 741.3513 | 12 |
| 24 | 2765.1640 | 1383.0856 | 2748.1375 | 1374.5724 | 2747.1535 | 1374.0804 | H | 1398.6583 | 699.8328 | 1381.6317 | 691.3195 | 1380.6477 | 690.8275 | 11 |
| 25 | 2822.1855 | 1411.5964 | 2805.1589 | 1403.0831 | 2804.1749 | 1402.5911 | G | 1261.5994 | 631.3033 | 1244.5728 | 622.7901 | 1243.5888 | 622.2980 | 10 |
| 26 | 2937.2124 | 1469.1099 | 2920.1859 | 1460.5966 | 2919.2019 | 1460.1046 | N | 1204.5779 | 602.7926 | 1187.5514 | 594.2793 | 1186.5674 | 593.7873 | 9  |
| 27 | 3123.2917 | 1562.1495 | 3106.2652 | 1553.6362 | 3105.2812 | 1553.1442 | W | 1089.5510 | 545.2791 | 1072.5244 | 536.7659 | 1071.5404 | 536.2738 | 8  |
| 28 | 3224.3394 | 1612.6733 | 3207.3129 | 1604.1601 | 3206.3289 | 1603.6681 | T | 903.4717  | 452.2395 | 886.4451  | 443.7262 | 885.4611  | 443.2342 | 7  |
| 29 | 3352.4344 | 1676.7208 | 3335.4078 | 1668.2076 | 3334.4238 | 1667.7155 | K | 802.4240  | 401.7156 | 785.3974  | 393.2024 | 784.4134  | 392.7103 | 6  |
| 30 | 3465.5184 | 1733.2629 | 3448.4919 | 1724.7496 | 3447.5079 | 1724.2576 | L | 674.3290  | 337.6681 | 657.3025  | 329.1549 | 656.3185  | 328.6629 | 5  |
| 31 | 3562.5712 | 1781.7892 | 3545.5447 | 1773.2760 | 3544.5606 | 1772.7840 | P | 561.2450  | 281.1261 | 544.2184  | 272.6128 | 543.2344  | 272.1208 | 4  |
| 32 | 3691.6138 | 1846.3105 | 3674.5873 | 1837.7973 | 3673.6032 | 1837.3053 | E | 464.1922  | 232.5997 | 447.1656  | 224.0865 | 446.1816  | 223.5945 | 3  |
| 33 | 3851.6445 | 1926.3259 | 3834.6179 | 1917.8126 | 3833.6339 | 1917.3206 | C | 335.1496  | 168.0784 | 318.1231  | 159.5652 |           |          | 2  |
| 34 |           |           |           |           |           |           | R | 175.1190  | 88.0631  | 158.0924  | 79.5498  |           |          | 1  |

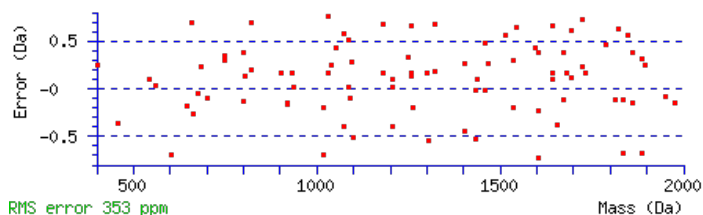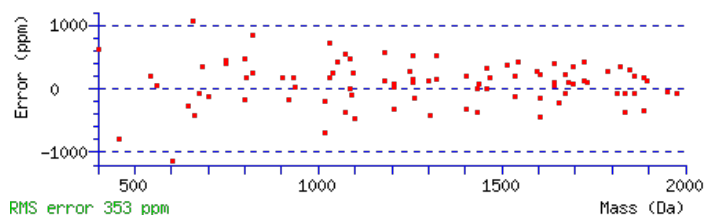

NCBI BLAST search of [DTAVFECLPQHAMFGNDTITCTTHGNWTKLPECR](#)

(Parameters: blastp, nr protein database, expect=20000, no filter, PAM30)

Other BLAST [web gateways](#)

All matches to this query

| Score | Mr(calc)  | Delta   | Sequence                                              | Site Analysis              |
|-------|-----------|---------|-------------------------------------------------------|----------------------------|
| 61.9  | 4024.7489 | 1.0102  | <a href="#">DTAVFECLPQHAMFGNDTITCTTHGNWTKLPECR</a>    | Deamidated N16, N26 64.45% |
| 58.6  | 4024.7489 | 1.0102  | <a href="#">DTAVFECLPQHAMFGNDTITCTTHGNWTKLPECR</a>    | Deamidated Q10, N26 30.15% |
| 51.1  | 4024.7489 | 1.0102  | <a href="#">DTAVFECLPQHAMFGNDTITCTTHGNWTKLPECR</a>    | Deamidated Q10, N16 5.40%  |
| 42.9  | 4023.7649 | 1.9942  | <a href="#">DTAVFECLPQHAMFGNDTITCTTHGNWTKLPECR</a>    |                            |
| 31.1  | 4023.7649 | 1.9942  | <a href="#">DTAVFECLPQHAMFGNDTITCTTHGNWTKLPECR</a>    |                            |
| 27.8  | 4023.7649 | 1.9942  | <a href="#">DTAVFECLPQHAMFGNDTITCTTHGNWTKLPECR</a>    |                            |
| 4.2   | 4025.7598 | -0.0007 | <a href="#">QILNSDTIGCCGDDNGLMEVEGAHTSRTMSINAAELK</a> |                            |
| 4.0   | 4025.7598 | -0.0007 | <a href="#">QILNSDTIGCCGDDNGLMEVEGAHTSRTMSINAAELK</a> |                            |
| 3.7   | 4024.7756 | 0.9835  | <a href="#">KSPPSYDDDEAPVEMETGENGENSSHSGQLPKSLPOK</a> |                            |
| 3.7   | 4024.7756 | 0.9835  | <a href="#">KSPPSYDDDEAPVEMETGENGENSSHSGQLPKSLPOK</a> |                            |

Mascot: <http://www.matrixscience.com/>

# MATRIX SCIENCE Mascot Search Results

## Peptide View

MS/MS Fragmentation of **DTAVFECLPQHAMFGNDTITCTTHGNWTKLPECR**

Found in **J3QLI0** in **con\_Xuniprot\_HUMAN3**, J3QLI0\_HUMAN Beta-2-glycoprotein 1 (Fragment) OS=Homo sapiens GN=APOH PE=2 SV=1

Match to Query 28304: 4008.771536 from(1003.200160,4+) intensity(15442.9561) rtinseconds(1962) scans(5205) index(24077)

Title: 111019\_Est\_MI\_YS\_G\_05Spectrum4497\_scans\_\_5205

Data file C:\\mascot\\20140703\_Tmgf\_1D\\CSV\_UseAnalysis\\MasterCSV\\All\_Glyco\\mgf\\ptm\\UC18ERLIC\_PTM\_35D.mgf

Click mouse within plot area to zoom in by factor of two about that point

Or, to Da

Label all possible matches Label matches used for scoring

Show Y-axis

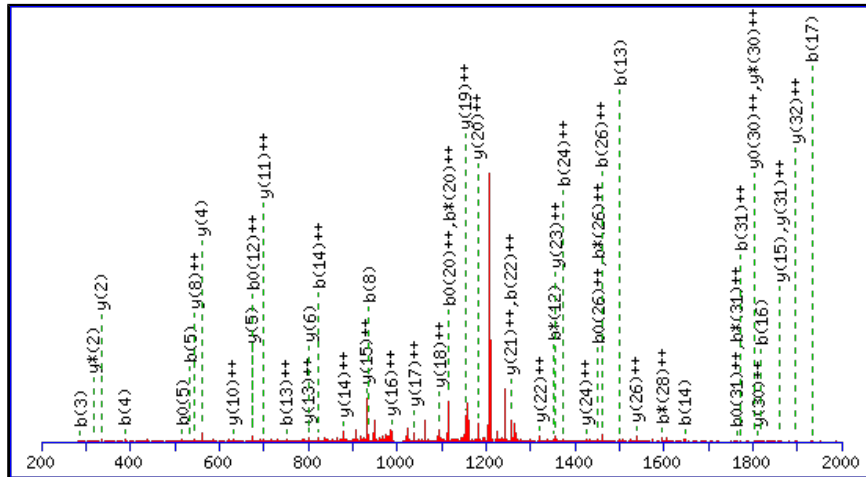

Monoisotopic mass of neutral peptide Mr(calc): 4008.7540

Fixed modifications: Carbamidomethyl (C) (apply to specified residues or termini only)

Variable modifications:

Q10 : Deamidated (NQ)

N26 : Deamidated (NQ)

Ions Score: 61 Expect: 8.2e-005

Matches : 51/374 fragment ions using 137 most intense peaks ([help](#))

| #  | b                | b <sup>++</sup>  | b*               | b <sup>*++</sup> | b <sup>0</sup>  | b <sup>0++</sup> | Seq. | y                | y <sup>++</sup>  | y*        | y <sup>*++</sup> | y <sup>0</sup> | y <sup>0++</sup> | #  |
|----|------------------|------------------|------------------|------------------|-----------------|------------------|------|------------------|------------------|-----------|------------------|----------------|------------------|----|
| 1  | 116.0342         | 58.5207          |                  |                  | 98.0237         | 49.5155          | D    |                  |                  |           |                  |                |                  | 34 |
| 2  | 217.0819         | 109.0446         |                  |                  | 199.0713        | 100.0393         | T    | 3894.7343        | 1947.8708        | 3877.7077 | 1939.3575        | 3876.7237      | 1938.8655        | 33 |
| 3  | <b>288.1190</b>  | 144.5631         |                  |                  | 270.1084        | 135.5579         | A    | 3793.6866        | <b>1897.3469</b> | 3776.6600 | 1888.8337        | 3775.6760      | 1888.3417        | 32 |
| 4  | <b>387.1874</b>  | 194.0974         |                  |                  | 369.1769        | 185.0921         | V    | 3722.6495        | <b>1861.8284</b> | 3705.6229 | 1853.3151        | 3704.6389      | 1852.8231        | 31 |
| 5  | <b>534.2558</b>  | 267.6316         |                  |                  | <b>516.2453</b> | 258.6263         | F    | 3623.5811        | <b>1812.2942</b> | 3606.5545 | <b>1803.7809</b> | 3605.5705      | <b>1803.2889</b> | 30 |
| 6  | 663.2984         | 332.1529         |                  |                  | 645.2879        | 323.1476         | E    | 3476.5126        | 1738.7600        | 3459.4861 | 1730.2467        | 3458.5021      | 1729.7547        | 29 |
| 7  | 823.3291         | 412.1682         |                  |                  | 805.3185        | 403.1629         | C    | 3347.4701        | 1674.2387        | 3330.4435 | 1665.7254        | 3329.4595      | 1665.2334        | 28 |
| 8  | <b>936.4131</b>  | 468.7102         |                  |                  | 918.4026        | 459.7049         | L    | 3187.4394        | 1594.2233        | 3170.4129 | 1585.7101        | 3169.4288      | 1585.2181        | 27 |
| 9  | 1033.4659        | 517.2366         |                  |                  | 1015.4553       | 508.2313         | P    | 3074.3553        | <b>1537.6813</b> | 3057.3288 | 1529.1680        | 3056.3448      | 1528.6760        | 26 |
| 10 | 1162.5085        | 581.7579         | 1145.4820        | 573.2446         | 1144.4979       | 572.7526         | Q    | 2977.3026        | 1489.1549        | 2960.2760 | 1480.6417        | 2959.2920      | 1480.1496        | 25 |
| 11 | 1299.5674        | 650.2873         | 1282.5409        | 641.7741         | 1281.5569       | 641.2821         | H    | 2848.2600        | <b>1424.6336</b> | 2831.2334 | 1416.1204        | 2830.2494      | 1415.6283        | 24 |
| 12 | 1370.6045        | 685.8059         | <b>1353.5780</b> | 677.2926         | 1352.5940       | <b>676.8006</b>  | A    | 2711.2011        | <b>1356.1042</b> | 2694.1745 | 1347.5909        | 2693.1905      | 1347.0989        | 23 |
| 13 | <b>1501.6450</b> | <b>751.3261</b>  | 1484.6185        | 742.8129         | 1483.6345       | 742.3209         | M    | 2640.1640        | <b>1320.5856</b> | 2623.1374 | 1312.0723        | 2622.1534      | 1311.5803        | 22 |
| 14 | <b>1648.7134</b> | <b>824.8604</b>  | 1631.6869        | 816.3471         | 1630.7029       | 815.8551         | F    | 2509.1235        | <b>1255.0654</b> | 2492.0969 | 1246.5521        | 2491.1129      | 1246.0601        | 21 |
| 15 | 1705.7349        | 853.3711         | 1688.7083        | 844.8578         | 1687.7243       | 844.3658         | G    | 2362.0551        | <b>1181.5312</b> | 2345.0285 | 1173.0179        | 2344.0445      | 1172.5259        | 20 |
| 16 | <b>1819.7778</b> | 910.3925         | 1802.7513        | 901.8793         | 1801.7673       | 901.3873         | N    | 2305.0336        | <b>1153.0204</b> | 2288.0070 | 1144.5072        | 2287.0230      | 1144.0152        | 19 |
| 17 | <b>1934.8048</b> | 967.9060         | 1917.7782        | 959.3927         | 1916.7942       | 958.9007         | D    | 2190.9907        | <b>1095.9990</b> | 2173.9641 | 1087.4857        | 2172.9801      | 1086.9937        | 18 |
| 18 | 2035.8524        | 1018.4299        | 2018.8259        | 1009.9166        | 2017.8419       | 1009.4246        | T    | 2075.9637        | <b>1038.4855</b> | 2058.9372 | 1029.9722        | 2057.9532      | 1029.4802        | 17 |
| 19 | 2148.9365        | 1074.9719        | 2131.9100        | 1066.4586        | 2130.9259       | 1065.9666        | I    | 1974.9160        | <b>987.9617</b>  | 1957.8895 | 979.4484         | 1956.9055      | 978.9564         | 16 |
| 20 | 2249.9842        | 1125.4957        | 2232.9576        | <b>1116.9825</b> | 2231.9736       | <b>1116.4904</b> | T    | <b>1861.8320</b> | <b>931.4196</b>  | 1844.8054 | 922.9064         | 1843.8214      | 922.4143         | 15 |
| 21 | 2410.0148        | 1205.5111        | 2392.9883        | 1196.9978        | 2392.0043       | 1196.5058        | C    | 1760.7843        | <b>880.8958</b>  | 1743.7578 | 872.3825         | 1742.7737      | 871.8905         | 14 |
| 22 | 2511.0625        | <b>1256.0349</b> | 2494.0360        | 1247.5216        | 2493.0519       | 1247.0296        | T    | 1600.7537        | <b>800.8805</b>  | 1583.7271 | 792.3672         | 1582.7431      | 791.8752         | 13 |



|    |           |           |           |           |           |           |   |           |          |           |          |           |          |    |
|----|-----------|-----------|-----------|-----------|-----------|-----------|---|-----------|----------|-----------|----------|-----------|----------|----|
| 23 | 2612.1102 | 1306.5587 | 2595.0836 | 1298.0455 | 2594.0996 | 1297.5535 | T | 1499.7060 | 750.3566 | 1482.6794 | 741.8434 | 1481.6954 | 741.3513 | 12 |
| 24 | 2749.1691 | 1375.0882 | 2732.1426 | 1366.5749 | 2731.1585 | 1366.0829 | H | 1398.6583 | 699.8328 | 1381.6317 | 691.3195 | 1380.6477 | 690.8275 | 11 |
| 25 | 2806.1906 | 1403.5989 | 2789.1640 | 1395.0856 | 2788.1800 | 1394.5936 | G | 1261.5994 | 631.3033 | 1244.5728 | 622.7901 | 1243.5888 | 622.2980 | 10 |
| 26 | 2921.2175 | 1461.1124 | 2904.1910 | 1452.5991 | 2903.2069 | 1452.1071 | N | 1204.5779 | 602.7926 | 1187.5514 | 594.2793 | 1186.5674 | 593.7873 | 9  |
| 27 | 3107.2968 | 1554.1520 | 3090.2703 | 1545.6388 | 3089.2863 | 1545.1468 | W | 1089.5510 | 545.2791 | 1072.5244 | 536.7659 | 1071.5404 | 536.2738 | 8  |
| 28 | 3208.3445 | 1604.6759 | 3191.3180 | 1596.1626 | 3190.3339 | 1595.6706 | T | 903.4717  | 452.2395 | 886.4451  | 443.7262 | 885.4611  | 443.2342 | 7  |
| 29 | 3336.4395 | 1668.7234 | 3319.4129 | 1660.2101 | 3318.4289 | 1659.7181 | K | 802.4240  | 401.7156 | 785.3974  | 393.2024 | 784.4134  | 392.7103 | 6  |
| 30 | 3449.5235 | 1725.2654 | 3432.4970 | 1716.7521 | 3431.5130 | 1716.2601 | L | 674.3290  | 337.6681 | 657.3025  | 329.1549 | 656.3185  | 328.6629 | 5  |
| 31 | 3546.5763 | 1773.7918 | 3529.5497 | 1765.2785 | 3528.5657 | 1764.7865 | P | 561.2450  | 281.1261 | 544.2184  | 272.6128 | 543.2344  | 272.1208 | 4  |
| 32 | 3675.6189 | 1838.3131 | 3658.5923 | 1829.7998 | 3657.6083 | 1829.3078 | E | 464.1922  | 232.5997 | 447.1656  | 224.0865 | 446.1816  | 223.5945 | 3  |
| 33 | 3835.6495 | 1918.3284 | 3818.6230 | 1909.8151 | 3817.6390 | 1909.3231 | C | 335.1496  | 168.0784 | 318.1231  | 159.5652 |           |          | 2  |
| 34 |           |           |           |           |           |           | R | 175.1190  | 88.0631  | 158.0924  | 79.5498  |           |          | 1  |

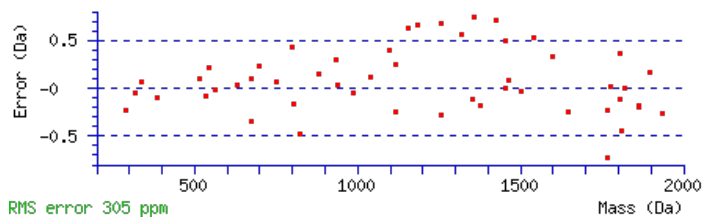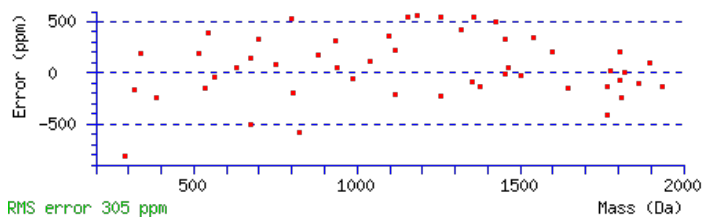

NCBI BLAST search of [DTAVFECLPQHAMFGNDTITCTTHGNWTKLPECR](#)

(Parameters: blastp, nr protein database, expect=20000, no filter, PAM30)

Other BLAST [web gateways](#)

All matches to this query

| Score | Mr(calc)  | Delta   | Sequence                                              | Site Analysis              |
|-------|-----------|---------|-------------------------------------------------------|----------------------------|
| 61.0  | 4008.7540 | 0.0176  | <a href="#">DTAVFECLPQHAMFGNDTITCTTHGNWTKLPECR</a>    | Deamidated Q10, N26 53.31% |
| 59.9  | 4008.7540 | 0.0176  | <a href="#">DTAVFECLPQHAMFGNDTITCTTHGNWTKLPECR</a>    | Deamidated N16, N26 42.05% |
| 50.4  | 4008.7540 | 0.0176  | <a href="#">DTAVFECLPQHAMFGNDTITCTTHGNWTKLPECR</a>    | Deamidated Q10, N16 4.64%  |
| 47.1  | 4007.7699 | 1.0016  | <a href="#">DTAVFECLPQHAMFGNDTITCTTHGNWTKLPECR</a>    |                            |
| 42.1  | 4007.7699 | 1.0016  | <a href="#">DTAVFECLPQHAMFGNDTITCTTHGNWTKLPECR</a>    |                            |
| 19.2  | 4007.7699 | 1.0016  | <a href="#">DTAVFECLPQHAMFGNDTITCTTHGNWTKLPECR</a>    |                            |
| 9.0   | 4008.7869 | -0.0153 | <a href="#">ITYFYINMGNQCAALNQERPSHAPNVYRMWNSK</a>     |                            |
| 9.0   | 4008.7869 | -0.0153 | <a href="#">ITYFYINMGNQCAALNQERPSHAPNVYRMWNSK</a>     |                            |
| 8.7   | 4008.7869 | -0.0153 | <a href="#">ITYFYINMGNQCAALNQERPSHAPNVYRMWNSK</a>     |                            |
| 7.2   | 4008.7771 | -0.0055 | <a href="#">GATMSNQMKMAEIVCIEQGEAVVTGLFQISMNGGAER</a> |                            |

Mascot: <http://www.matrixscience.com/>



# MASCOT SCIENCE Mascot Search Results

## Peptide View

MS/MS Fragmentation of **LGNWSAMPSCK**

Found in **J3KS17** in **con\_Xuniprot\_HUMAN3**, J3KS17\_HUMAN Beta-2-glycoprotein 1 (Fragment) OS=Homo sapiens GN=APOH PE=4 SV=1

Match to Query 1743: 1250.544788 from(626.279670,2+) intensity(315795.1563) rtinseconds(994) scans(2288) index(23118)

Title: 111019\_Est\_MI\_YS\_G\_04Spectrum1930\_scans\_\_2288

Data file C:\\mascot\\20140703\_Tmgf\_1D\\CSV\_UseAnalysis\\MasterCSV\\All\_Glyco\\mgf\\ptm\\UC18ERLIC\_PTM\_35D.mgf

Click mouse within plot area to zoom in by factor of two about that point

Or, to Da

Label all possible matches Label matches used for scoring

Show Y-axis

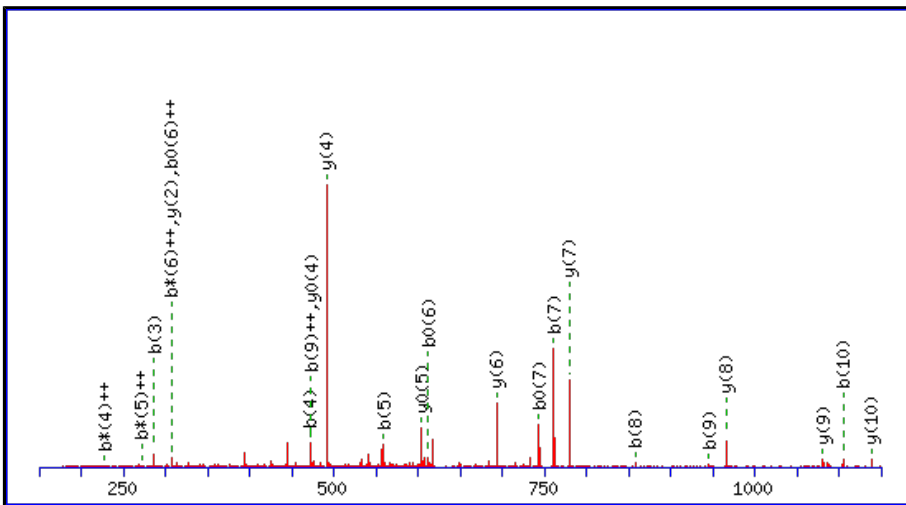

Monoisotopic mass of neutral peptide  $M_r(\text{calc})$ : 1250.5424

Fixed modifications: Carbamidomethyl (C) (apply to specified residues or termini only)

Variable modifications:

N3 : Deamidated (NQ)

Ions Score: 59 Expect: 9.9e-005

Matches : 23/104 fragment ions using 30 most intense peaks ([help](#))

| #  | b                | b <sup>++</sup> | b <sup>*</sup> | b <sup>***</sup> | b <sup>0</sup>  | b <sup>0++</sup> | Seq. | y                | y <sup>++</sup> | y <sup>*</sup> | y <sup>***</sup> | y <sup>0</sup>  | y <sup>0++</sup> | #  |
|----|------------------|-----------------|----------------|------------------|-----------------|------------------|------|------------------|-----------------|----------------|------------------|-----------------|------------------|----|
| 1  | 114.0913         | 57.5493         |                |                  |                 |                  | L    |                  |                 |                |                  |                 |                  | 11 |
| 2  | 171.1128         | 86.0600         |                |                  |                 |                  | G    | <b>1138.4656</b> | 569.7364        | 1121.4390      | 561.2232         | 1120.4550       | 560.7312         | 10 |
| 3  | <b>286.1397</b>  | 143.5735        | 269.1132       | 135.0602         |                 |                  | N    | <b>1081.4441</b> | 541.2257        | 1064.4176      | 532.7124         | 1063.4336       | 532.2204         | 9  |
| 4  | <b>472.2191</b>  | 236.6132        | 455.1925       | <b>228.0999</b>  |                 |                  | W    | <b>966.4172</b>  | 483.7122        | 949.3906       | 475.1990         | 948.4066        | 474.7069         | 8  |
| 5  | <b>559.2511</b>  | 280.1292        | 542.2245       | <b>271.6159</b>  | 541.2405        | 271.1239         | S    | <b>780.3379</b>  | 390.6726        | 763.3113       | 382.1593         | 762.3273        | 381.6673         | 7  |
| 6  | 630.2882         | 315.6477        | 613.2617       | <b>307.1345</b>  | <b>612.2776</b> | <b>306.6425</b>  | A    | <b>693.3058</b>  | 347.1566        | 676.2793       | 338.6433         | 675.2953        | 338.1513         | 6  |
| 7  | <b>761.3287</b>  | 381.1680        | 744.3021       | 372.6547         | <b>743.3181</b> | 372.1627         | M    | 622.2687         | 311.6380        | 605.2422       | 303.1247         | <b>604.2582</b> | 302.6327         | 5  |
| 8  | <b>858.3815</b>  | 429.6944        | 841.3549       | 421.1811         | 840.3709        | 420.6891         | P    | <b>491.2282</b>  | 246.1178        | 474.2017       | 237.6045         | <b>473.2177</b> | 237.1125         | 4  |
| 9  | <b>945.4135</b>  | <b>473.2104</b> | 928.3869       | 464.6971         | 927.4029        | 464.2051         | S    | 394.1755         | 197.5914        | 377.1489       | 189.0781         | 376.1649        | 188.5861         | 3  |
| 10 | <b>1105.4441</b> | 553.2257        | 1088.4176      | 544.7124         | 1087.4336       | 544.2204         | C    | <b>307.1435</b>  | 154.0754        | 290.1169       | 145.5621         |                 |                  | 2  |
| 11 |                  |                 |                |                  |                 |                  | K    | 147.1128         | 74.0600         | 130.0863       | 65.5468          |                 |                  | 1  |

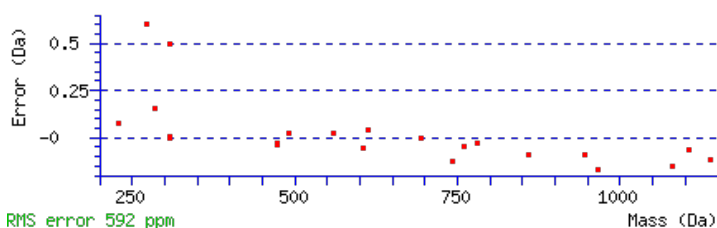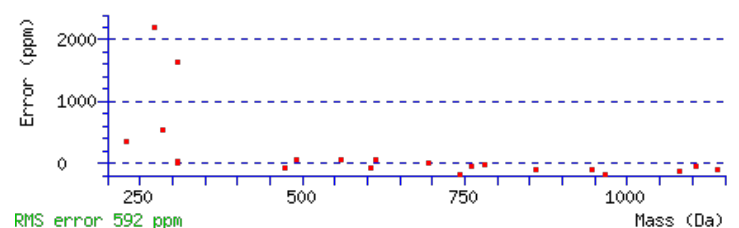

NCBI BLAST search of [LGNWSAMPSCK](#)

(Parameters: blastp, nr protein database, expect=20000, no filter, PAM30)

Other BLAST [web gateways](#)

**All matches to this query**

| Score | Mr(calc)  | Delta   | Sequence                    |
|-------|-----------|---------|-----------------------------|
| 58.9  | 1250.5424 | 0.0024  | <a href="#">LGNWSAMPSCK</a> |
| 1.5   | 1250.5449 | -0.0001 | <a href="#">LDGITDDTNCK</a> |
| 0.3   | 1250.5449 | -0.0001 | <a href="#">CNTDDTIGDLK</a> |

**Mascot:** <http://www.matrixscience.com/>

# MATRIX SCIENCE Mascot Search Results

## Peptide View

MS/MS Fragmentation of **DTAVFECLPQHAMFGNDTITCTTHGNWTKLPECR**

Found in **J3QLI0** in **con\_Xuniprot\_HUMAN3**, J3QLI0\_HUMAN Beta-2-glycoprotein 1 (Fragment) OS=Homo sapiens GN=APOH PE=2 SV=1

Match to Query 28350: 4027.759842 from(1343.593890,3+) intensity(22425.1543) rtinseconds(1815) scans(4620) index(26765)

Title: 111019\_Est\_MI\_YS\_G\_09Spectrum4018\_scans\_4620

Data file C:\mascot\20140703\_Tmgf\_1D\CSV\_UseAnalysis\MasterCSV\All\_Glyco\mgf\ptm\UC18ERLIC\_PTM\_35D.mgf

Click mouse within plot area to zoom in by factor of two about that point

Or,  to  Da

Label all possible matches  Label matches used for scoring

Show Y-axis

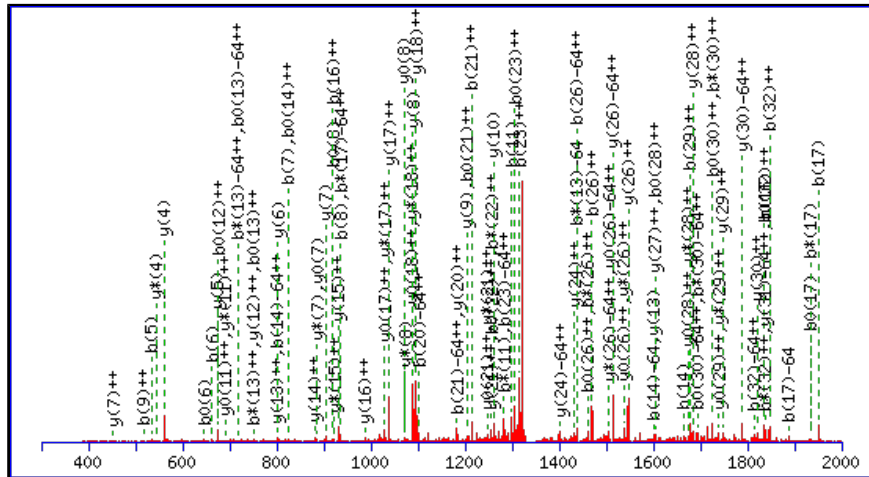

Monoisotopic mass of neutral peptide Mr(calc): 4025.7329

Fixed modifications: Carbamidomethyl (C) (apply to specified residues or termini only)

Variable modifications:

Q10 : Deamidated (NQ)

M13 : Oxidation (M), with neutral losses 0.0000(shown in table), 63.9983

N16 : Deamidated (NQ)

N26 : Deamidated (NQ)

Ions Score: 57 Expect: 0.00017

Matches : 99/572 fragment ions using 166 most intense peaks [\(help\)](#)

| #  | b                | b <sup>++</sup>  | b <sup>*</sup>   | b <sup>*++</sup> | b <sup>0</sup>   | b <sup>0++</sup> | Seq. | y         | y <sup>++</sup>  | y <sup>*</sup> | y <sup>*++</sup> | y <sup>0</sup> | y <sup>0++</sup> | #  |
|----|------------------|------------------|------------------|------------------|------------------|------------------|------|-----------|------------------|----------------|------------------|----------------|------------------|----|
| 1  | 116.0342         | 58.5207          |                  |                  | 98.0237          | 49.5155          | D    |           |                  |                |                  |                |                  | 34 |
| 2  | 217.0819         | 109.0446         |                  |                  | 199.0713         | 100.0393         | T    | 3911.7132 | 1956.3602        | 3894.6867      | 1947.8470        | 3893.7026      | 1947.3550        | 33 |
| 3  | 288.1190         | 144.5631         |                  |                  | 270.1084         | 135.5579         | A    | 3810.6655 | 1905.8364        | 3793.6390      | 1897.3231        | 3792.6550      | 1896.8311        | 32 |
| 4  | 387.1874         | 194.0974         |                  |                  | 369.1769         | 185.0921         | V    | 3739.6284 | 1870.3178        | 3722.6019      | 1861.8046        | 3721.6178      | 1861.3126        | 31 |
| 5  | <b>534.2558</b>  | 267.6316         |                  |                  | 516.2453         | 258.6263         | F    | 3640.5600 | <b>1820.7836</b> | 3623.5334      | 1812.2704        | 3622.5494      | 1811.7784        | 30 |
| 6  | <b>663.2984</b>  | 332.1529         |                  |                  | <b>645.2879</b>  | 323.1476         | E    | 3493.4916 | <b>1747.2494</b> | 3476.4650      | <b>1738.7362</b> | 3475.4810      | <b>1738.2441</b> | 29 |
| 7  | <b>823.3291</b>  | 412.1682         |                  |                  | 805.3185         | 403.1629         | C    | 3364.4490 | <b>1682.7281</b> | 3347.4224      | <b>1674.2149</b> | 3346.4384      | <b>1673.7228</b> | 28 |
| 8  | <b>936.4131</b>  | 468.7102         |                  |                  | <b>918.4026</b>  | 459.7049         | L    | 3204.4183 | <b>1602.7128</b> | 3187.3918      | 1594.1995        | 3186.4078      | 1593.7075        | 27 |
| 9  | 1033.4659        | <b>517.2366</b>  |                  |                  | 1015.4553        | 508.2313         | P    | 3091.3343 | <b>1546.1708</b> | 3074.3077      | <b>1537.6575</b> | 3073.3237      | <b>1537.1655</b> | 26 |
| 10 | 1162.5085        | 581.7579         | 1145.4820        | 573.2446         | 1144.4979        | 572.7526         | Q    | 2994.2815 | 1497.6444        | 2977.2550      | 1489.1311        | 2976.2709      | 1488.6391        | 25 |
| 11 | <b>1299.5674</b> | 650.2873         | <b>1282.5409</b> | 641.7741         | 1281.5569        | 641.2821         | H    | 2865.2389 | <b>1433.1231</b> | 2848.2124      | 1424.6098        | 2847.2283      | 1424.1178        | 24 |
| 12 | 1370.6045        | 685.8059         | 1353.5780        | 677.2926         | 1352.5940        | <b>676.8006</b>  | A    | 2728.1800 | 1364.5936        | 2711.1535      | 1356.0804        | 2710.1694      | 1355.5884        | 23 |
| 13 | 1517.6399        | 759.3236         | 1500.6134        | <b>750.8103</b>  | 1499.6294        | <b>750.3183</b>  | M    | 2657.1429 | 1329.0751        | 2640.1163      | 1320.5618        | 2639.1323      | 1320.0698        | 22 |
| 14 | <b>1664.7083</b> | 832.8578         | 1647.6818        | 824.3445         | 1646.6978        | <b>823.8525</b>  | F    | 2510.1075 | <b>1255.5574</b> | 2493.0809      | <b>1247.0441</b> | 2492.0969      | <b>1246.5521</b> | 21 |
| 15 | 1721.7298        | 861.3685         | 1704.7033        | 852.8553         | 1703.7192        | 852.3633         | G    | 2363.0391 | <b>1182.0232</b> | 2346.0125      | 1173.5099        | 2345.0285      | 1173.0179        | 20 |
| 16 | <b>1836.7568</b> | <b>918.8820</b>  | 1819.7302        | 910.3687         | 1818.7462        | 909.8767         | N    | 2306.0176 | 1153.5124        | 2288.9911      | 1144.9992        | 2288.0070      | 1144.5072        | 19 |
| 17 | <b>1951.7837</b> | 976.3955         | <b>1934.7571</b> | 967.8822         | <b>1933.7731</b> | 967.3902         | D    | 2190.9907 | <b>1095.9990</b> | 2173.9641      | <b>1087.4857</b> | 2172.9801      | <b>1086.9937</b> | 18 |
| 18 | 2052.8314        | 1026.9193        | 2035.8048        | 1018.4061        | 2034.8208        | 1017.9140        | T    | 2075.9637 | <b>1038.4855</b> | 2058.9372      | <b>1029.9722</b> | 2057.9532      | <b>1029.4802</b> | 17 |
| 19 | 2165.9154        | 1083.4614        | 2148.8889        | 1074.9481        | 2147.9049        | 1074.4561        | I    | 1974.9160 | <b>987.9617</b>  | 1957.8895      | 979.4484         | 1956.9055      | 978.9564         | 16 |
| 20 | 2266.9631        | 1133.9852        | 2249.9366        | 1125.4719        | 2248.9526        | 1124.9799        | T    | 1861.8320 | <b>931.4196</b>  | 1844.8054      | <b>922.9064</b>  | 1843.8214      | 922.4143         | 15 |
| 21 | 2426.9938        | <b>1214.0005</b> | 2409.9672        | 1205.4872        | 2408.9832        | <b>1204.9952</b> | C    | 1760.7843 | <b>880.8958</b>  | 1743.7578      | 872.3825         | 1742.7737      | 871.8905         | 14 |

|    |           |           |           |           |           |           |   |           |          |           |          |           |          |    |
|----|-----------|-----------|-----------|-----------|-----------|-----------|---|-----------|----------|-----------|----------|-----------|----------|----|
| 22 | 2528.0414 | 1264.5244 | 2511.0149 | 1256.0111 | 2510.0309 | 1255.5191 | T | 1600.7537 | 800.8805 | 1583.7271 | 792.3672 | 1582.7431 | 791.8752 | 13 |
| 23 | 2629.0891 | 1315.0482 | 2612.0626 | 1306.5349 | 2611.0786 | 1306.0429 | T | 1499.7060 | 750.3566 | 1482.6794 | 741.8434 | 1481.6954 | 741.3513 | 12 |
| 24 | 2766.1480 | 1383.5777 | 2749.1215 | 1375.0644 | 2748.1375 | 1374.5724 | H | 1398.6583 | 699.8328 | 1381.6317 | 691.3195 | 1380.6477 | 690.8275 | 11 |
| 25 | 2823.1695 | 1412.0884 | 2806.1429 | 1403.5751 | 2805.1589 | 1403.0831 | G | 1261.5994 | 631.3033 | 1244.5728 | 622.7901 | 1243.5888 | 622.2980 | 10 |
| 26 | 2938.1964 | 1469.6019 | 2921.1699 | 1461.0886 | 2920.1859 | 1460.5966 | N | 1204.5779 | 602.7926 | 1187.5514 | 594.2793 | 1186.5674 | 593.7873 | 9  |
| 27 | 3124.2758 | 1562.6415 | 3107.2492 | 1554.1282 | 3106.2652 | 1553.6362 | W | 1089.5510 | 545.2791 | 1072.5244 | 536.7659 | 1071.5404 | 536.2738 | 8  |
| 28 | 3225.3234 | 1613.1654 | 3208.2969 | 1604.6521 | 3207.3129 | 1604.1601 | T | 903.4717  | 452.2395 | 886.4451  | 443.7262 | 885.4611  | 443.2342 | 7  |
| 29 | 3353.4184 | 1677.2128 | 3336.3918 | 1668.6996 | 3335.4078 | 1668.2076 | K | 802.4240  | 401.7156 | 785.3974  | 393.2024 | 784.4134  | 392.7103 | 6  |
| 30 | 3466.5025 | 1733.7549 | 3449.4759 | 1725.2416 | 3448.4919 | 1724.7496 | L | 674.3290  | 337.6681 | 657.3025  | 329.1549 | 656.3185  | 328.6629 | 5  |
| 31 | 3563.5552 | 1782.2813 | 3546.5287 | 1773.7680 | 3545.5447 | 1773.2760 | P | 561.2450  | 281.1261 | 544.2184  | 272.6128 | 543.2344  | 272.1208 | 4  |
| 32 | 3692.5978 | 1846.8025 | 3675.5713 | 1838.2893 | 3674.5873 | 1837.7973 | E | 464.1922  | 232.5997 | 447.1656  | 224.0865 | 446.1816  | 223.5945 | 3  |
| 33 | 3852.6285 | 1926.8179 | 3835.6019 | 1918.3046 | 3834.6179 | 1917.8126 | C | 335.1496  | 168.0784 | 318.1231  | 159.5652 |           |          | 2  |
| 34 |           |           |           |           |           |           | R | 175.1190  | 88.0631  | 158.0924  | 79.5498  |           |          | 1  |

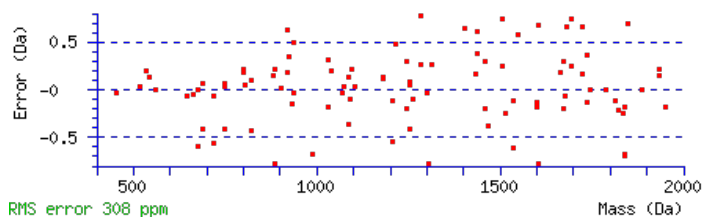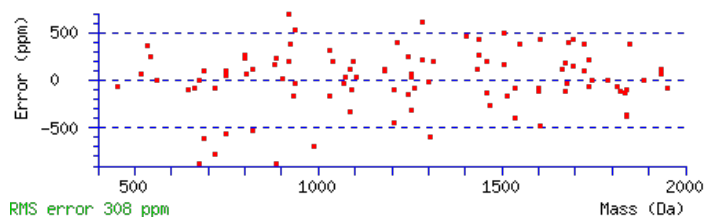

NCBI BLAST search of [DTAVFECLPQHAMFGNDTITCTTHGNWTKLPECR](#)

(Parameters: blastp, nr protein database, expect=20000, no filter, PAM30)

Other BLAST [web gateways](#)

All matches to this query

| Score | Mr(calc)  | Delta   | Sequence                                            |
|-------|-----------|---------|-----------------------------------------------------|
| 56.7  | 4025.7329 | 2.0270  | <a href="#">DTAVFECLPQHAMFGNDTITCTTHGNWTKLPECR</a>  |
| 2.5   | 4026.7735 | 0.9863  | <a href="#">SRDEENDEDVRNGLESYHGQLDDGMCLLTPVSIDK</a> |
| 1.9   | 4027.7665 | -0.0067 | <a href="#">SCFHIICLVGTISLACNDMTPEQMATNVNCSSPER</a> |
| 1.3   | 4026.7575 | 1.0024  | <a href="#">TMPPPNMGMPAMPTMPPMQHQIPROFIQVHAMQR</a>  |
| 1.3   | 4026.7575 | 1.0024  | <a href="#">TMPPPNMGMPAMPTMPPMQHQIPROFIQVHAMQR</a>  |
| 1.3   | 4026.7575 | 1.0024  | <a href="#">TMPPPNMGMPAMPTMPPMQHQIPROFIQVHAMQR</a>  |
| 1.0   | 4025.7625 | 1.9973  | <a href="#">MERVNDASCPSGCYTYQVSRHSTEMLHNLNQQR</a>   |
| 1.0   | 4025.7625 | 1.9973  | <a href="#">MERVNDASCPSGCYTYQVSRHSTEMLHNLNQQR</a>   |
| 0.7   | 4026.7498 | 1.0100  | <a href="#">NNCYQFFDESKNWYESQASCMSONASLLKVYSK</a>   |
| 0.7   | 4025.7735 | 1.9864  | <a href="#">TMPPPNMGMPAMPTMPPMQHQIPROFIQVHAMQR</a>  |

Mascot: <http://www.matrixscience.com/>

# MASCOT SCIENCE Mascot Search Results

## Peptide View

MS/MS Fragmentation of **LGNWSAMPSCK**

Found in **J3KS17** in **con\_Xuniprot\_HUMAN3**, J3KS17\_HUMAN Beta-2-glycoprotein 1 (Fragment) OS=Homo sapiens GN=APOH PE=4 SV=1

Match to Query 1776: 1266.540328 from(634.277440,2+) intensity(53583.2227) rtinseconds(510) scans(1039) index(5001)

Title: 111019\_Est\_ISCardio\_NMI\_YP\_G\_8Spectrum901\_scans\_\_1039

Data file C:\\mascot\\20140703\_Tmgf\_1D\\CSV\_UseAnalysis\\MasterCSV\\All\_Glyco\\mgf\\ptm\\UC18ERLIC\_PTM\_35D.mgf

Click mouse within plot area to zoom in by factor of two about that point

Or, to Da

Label all possible matches Label matches used for scoring

Show Y-axis

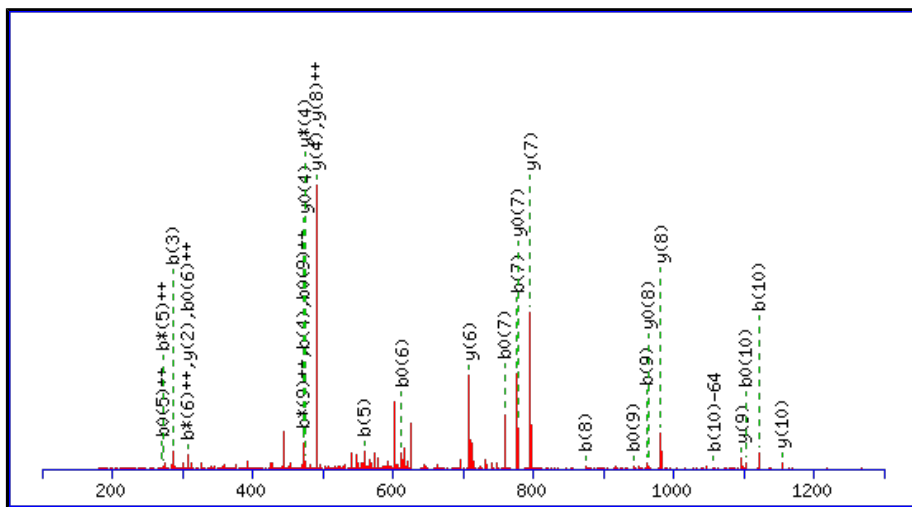

Monoisotopic mass of neutral peptide **Mr(calc)**: 1266.5373

Fixed modifications: Carbamidomethyl (C) (apply to specified residues or termini only)

Variable modifications:

N3 : Deamidated (NQ)

M7 : Oxidation (M), with neutral losses 0.0000(shown in table), 63.9983

Ions Score: 54 Expect: 0.00022

Matches : 30/164 fragment ions using 41 most intense peaks ([help](#))

| #  | b                | b <sup>++</sup> | b <sup>*</sup> | b <sup>***</sup> | b <sup>0</sup>   | b <sup>0++</sup> | Seq. | y                | y <sup>++</sup> | y <sup>*</sup>  | y <sup>***</sup> | y <sup>0</sup>  | y <sup>0++</sup> | #  |
|----|------------------|-----------------|----------------|------------------|------------------|------------------|------|------------------|-----------------|-----------------|------------------|-----------------|------------------|----|
| 1  | 114.0913         | 57.5493         |                |                  |                  |                  | L    |                  |                 |                 |                  |                 |                  | 11 |
| 2  | 171.1128         | 86.0600         |                |                  |                  |                  | G    | <b>1154.4605</b> | 577.7339        | 1137.4340       | 569.2206         | 1136.4499       | 568.7286         | 10 |
| 3  | <b>286.1397</b>  | 143.5735        | 269.1132       | 135.0602         |                  |                  | N    | <b>1097.4390</b> | 549.2232        | 1080.4125       | 540.7099         | 1079.4285       | 540.2179         | 9  |
| 4  | <b>472.2191</b>  | 236.6132        | 455.1925       | 228.0999         |                  |                  | W    | <b>982.4121</b>  | <b>491.7097</b> | 965.3856        | 483.1964         | <b>964.4015</b> | 482.7044         | 8  |
| 5  | <b>559.2511</b>  | 280.1292        | 542.2245       | <b>271.6159</b>  | 541.2405         | <b>271.1239</b>  | S    | <b>796.3328</b>  | 398.6700        | 779.3062        | 390.1568         | <b>778.3222</b> | 389.6647         | 7  |
| 6  | 630.2882         | 315.6477        | 613.2617       | <b>307.1345</b>  | <b>612.2776</b>  | <b>306.6425</b>  | A    | <b>709.3008</b>  | 355.1540        | 692.2742        | 346.6407         | 691.2902        | 346.1487         | 6  |
| 7  | <b>777.3236</b>  | 389.1654        | 760.2971       | 380.6522         | <b>759.3130</b>  | 380.1602         | M    | 638.2636         | 319.6355        | 621.2371        | 311.1222         | 620.2531        | 310.6302         | 5  |
| 8  | <b>874.3764</b>  | 437.6918        | 857.3498       | 429.1785         | 856.3658         | 428.6865         | P    | <b>491.2282</b>  | 246.1178        | <b>474.2017</b> | 237.6045         | <b>473.2177</b> | 237.1125         | 4  |
| 9  | <b>961.4084</b>  | 481.2078        | 944.3818       | <b>472.6946</b>  | <b>943.3978</b>  | <b>472.2026</b>  | S    | 394.1755         | 197.5914        | 377.1489        | 189.0781         | 376.1649        | 188.5861         | 3  |
| 10 | <b>1121.4390</b> | 561.2232        | 1104.4125      | 552.7099         | <b>1103.4285</b> | 552.2179         | C    | <b>307.1435</b>  | 154.0754        | 290.1169        | 145.5621         |                 |                  | 2  |
| 11 |                  |                 |                |                  |                  |                  | K    | 147.1128         | 74.0600         | 130.0863        | 65.5468          |                 |                  | 1  |

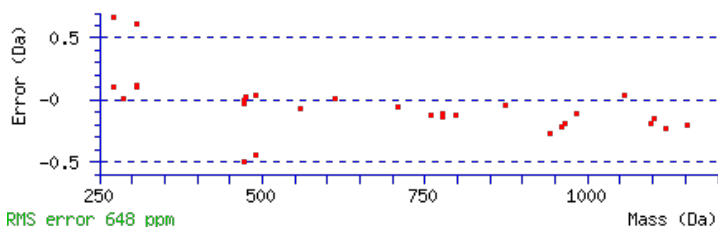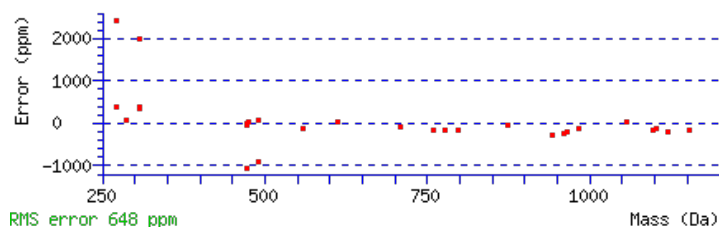

NCBI **BLAST** search of [LGNWSAMPSCK](#)

(Parameters: blastp, nr protein database, expect=20000, no filter, PAM30)

Other BLAST [web gateways](#)

**All matches to this query**

| Score | Mr(calc)  | Delta  | Sequence                    |
|-------|-----------|--------|-----------------------------|
| 53.9  | 1266.5373 | 0.0031 | <a href="#">LGNWSAMPSCK</a> |
| 10.3  | 1266.5373 | 0.0030 | <a href="#">LFTEMHSDCK</a>  |
| 0.7   | 1266.5397 | 0.0006 | <a href="#">KNEENEKSCK</a>  |
| 0.1   | 1265.5420 | 0.9983 | <a href="#">YGEALMLHDAM</a> |

**Mascot:** <http://www.matrixscience.com/>

# MATRIX SCIENCE Mascot Search Results

## Peptide View

MS/MS Fragmentation of **DTAVFECLPQHAMFGNDTITCTTHGNWTKLPECR**

Found in **J3QLI0** in **con\_Xuniprot\_HUMAN3**, J3QLI0\_HUMAN Beta-2-glycoprotein 1 (Fragment) OS=Homo sapiens GN=APOH PE=2 SV=1

Match to Query 28315: 4008.781136 from(1003.202560,4+) intensity(55459.2969) rtinseconds(1970) scans(5058) index(26836)

Title: 111019\_Est\_MI\_YS\_G\_09Spectrum4402\_scans\_\_5058

Data file C:\mascot\20140703\_Tmgf\_1D\CSV\_UseAnalysis\MasterCSV\All\_Glyco\mgf\ptm\UC18ERLIC\_PTM\_35D.mgf

Click mouse within plot area to zoom in by factor of two about that point

Or, to Da

Label all possible matches Label matches used for scoring

Show Y-axis

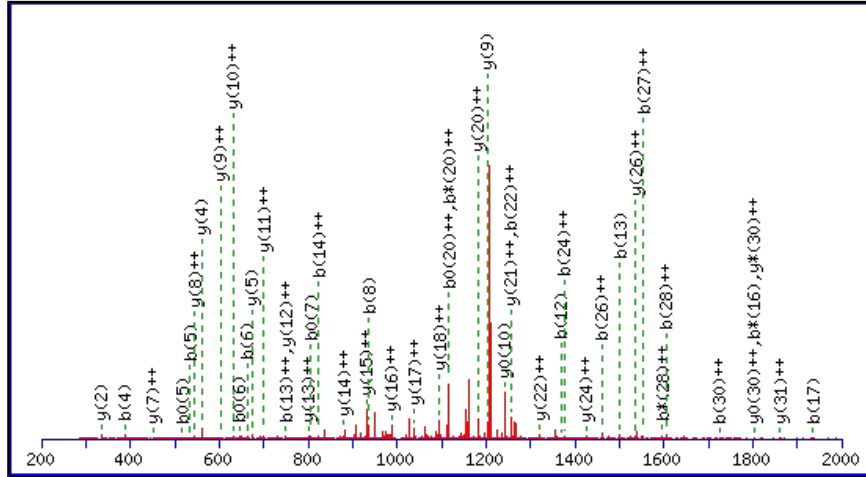

Monoisotopic mass of neutral peptide Mr(calc): 4007.7699

Fixed modifications: Carbamidomethyl (C) (apply to specified residues or termini only)

Variable modifications: N16 : Deamidated (NQ)

Ions Score: 54 Expect: 0.00049

Matches : 47/374 fragment ions using 120 most intense peaks ([help](#))

| #  | b                | b <sup>++</sup>  | b <sup>*</sup>   | b <sup>*++</sup> | b <sup>0</sup>  | b <sup>0++</sup> | Seq. | y         | y <sup>++</sup>  | y <sup>*</sup> | y <sup>*++</sup> | y <sup>0</sup> | y <sup>0++</sup> | #  |
|----|------------------|------------------|------------------|------------------|-----------------|------------------|------|-----------|------------------|----------------|------------------|----------------|------------------|----|
| 1  | 116.0342         | 58.5207          |                  |                  | 98.0237         | 49.5155          | D    |           |                  |                |                  |                |                  | 34 |
| 2  | 217.0819         | 109.0446         |                  |                  | 199.0713        | 100.0393         | T    | 3893.7503 | 1947.3788        | 3876.7237      | 1938.8655        | 3875.7397      | 1938.3735        | 33 |
| 3  | 288.1190         | 144.5631         |                  |                  | 270.1084        | 135.5579         | A    | 3792.7026 | 1896.8549        | 3775.6760      | 1888.3417        | 3774.6920      | 1887.8496        | 32 |
| 4  | <b>387.1874</b>  | 194.0974         |                  |                  | 369.1769        | 185.0921         | V    | 3721.6655 | <b>1861.3364</b> | 3704.6389      | 1852.8231        | 3703.6549      | 1852.3311        | 31 |
| 5  | <b>534.2558</b>  | 267.6316         |                  |                  | <b>516.2453</b> | 258.6263         | F    | 3622.5970 | 1811.8022        | 3605.5705      | <b>1803.2889</b> | 3604.5865      | <b>1802.7969</b> | 30 |
| 6  | <b>663.2984</b>  | 332.1529         |                  |                  | <b>645.2879</b> | 323.1476         | E    | 3475.5286 | 1738.2680        | 3458.5021      | 1729.7547        | 3457.5181      | 1729.2627        | 29 |
| 7  | 823.3291         | 412.1682         |                  |                  | <b>805.3185</b> | 403.1629         | C    | 3346.4860 | 1673.7467        | 3329.4595      | 1665.2334        | 3328.4755      | 1664.7414        | 28 |
| 8  | <b>936.4131</b>  | 468.7102         |                  |                  | 918.4026        | 459.7049         | L    | 3186.4554 | 1593.7313        | 3169.4288      | 1585.2181        | 3168.4448      | 1584.7261        | 27 |
| 9  | 1033.4659        | 517.2366         |                  |                  | 1015.4553       | 508.2313         | P    | 3073.3713 | <b>1537.1893</b> | 3056.3448      | 1528.6760        | 3055.3608      | 1528.1840        | 26 |
| 10 | 1161.5245        | 581.2659         | 1144.4979        | 572.7526         | 1143.5139       | 572.2606         | Q    | 2976.3186 | 1488.6629        | 2959.2920      | 1480.1496        | 2958.3080      | 1479.6576        | 25 |
| 11 | 1298.5834        | 649.7953         | 1281.5569        | 641.2821         | 1280.5728       | 640.7901         | H    | 2848.2600 | <b>1424.6336</b> | 2831.2334      | 1416.1204        | 2830.2494      | 1415.6283        | 24 |
| 12 | <b>1369.6205</b> | 685.3139         | 1352.5940        | 676.8006         | 1351.6099       | 676.3086         | A    | 2711.2011 | 1356.1042        | 2694.1745      | 1347.5909        | 2693.1905      | 1347.0989        | 23 |
| 13 | <b>1500.6610</b> | <b>750.8341</b>  | 1483.6345        | 742.3209         | 1482.6504       | 741.8289         | M    | 2640.1640 | <b>1320.5856</b> | 2623.1374      | 1312.0723        | 2622.1534      | 1311.5803        | 22 |
| 14 | 1647.7294        | <b>824.3683</b>  | 1630.7029        | 815.8551         | 1629.7188       | 815.3631         | F    | 2509.1235 | <b>1255.0654</b> | 2492.0969      | 1246.5521        | 2491.1129      | 1246.0601        | 21 |
| 15 | 1704.7509        | 852.8791         | 1687.7243        | 844.3658         | 1686.7403       | 843.8738         | G    | 2362.0551 | <b>1181.5312</b> | 2345.0285      | 1173.0179        | 2344.0445      | 1172.5259        | 20 |
| 16 | 1819.7778        | 910.3925         | <b>1802.7513</b> | 901.8793         | 1801.7673       | 901.3873         | N    | 2305.0336 | 1153.0204        | 2288.0070      | 1144.5072        | 2287.0230      | 1144.0152        | 19 |
| 17 | <b>1934.8048</b> | 967.9060         | 1917.7782        | 959.3927         | 1916.7942       | 958.9007         | D    | 2190.0067 | <b>1095.5070</b> | 2172.9801      | 1086.9937        | 2171.9961      | 1086.5017        | 18 |
| 18 | 2035.8524        | 1018.4299        | 2018.8259        | 1009.9166        | 2017.8419       | 1009.4246        | T    | 2074.9797 | <b>1037.9935</b> | 2057.9532      | 1029.4802        | 2056.9691      | 1028.9882        | 17 |
| 19 | 2148.9365        | 1074.9719        | 2131.9100        | 1066.4586        | 2130.9259       | 1065.9666        | I    | 1973.9320 | <b>987.4697</b>  | 1956.9055      | 978.9564         | 1955.9215      | 978.4644         | 16 |
| 20 | 2249.9842        | 1125.4957        | 2232.9576        | <b>1116.9825</b> | 2231.9736       | <b>1116.4904</b> | T    | 1860.8480 | <b>930.9276</b>  | 1843.8214      | 922.4143         | 1842.8374      | 921.9223         | 15 |
| 21 | 2410.0148        | 1205.5111        | 2392.9883        | 1196.9978        | 2392.0043       | 1196.5058        | C    | 1759.8003 | <b>880.4038</b>  | 1742.7737      | 871.8905         | 1741.7897      | 871.3985         | 14 |
| 22 | 2511.0625        | <b>1256.0349</b> | 2494.0360        | 1247.5216        | 2493.0519       | 1247.0296        | T    | 1599.7696 | <b>800.3885</b>  | 1582.7431      | 791.8752         | 1581.7591      | 791.3832         | 13 |
| 23 | 2612.1102        | 1306.5587        | 2595.0836        | 1298.0455        | 2594.0996       | 1297.5535        | T    | 1498.7220 | <b>749.8646</b>  | 1481.6954      | 741.3513         | 1480.7114      | 740.8593         | 12 |



|    |           |                  |           |                  |           |           |   |                  |                 |           |          |                  |          |           |
|----|-----------|------------------|-----------|------------------|-----------|-----------|---|------------------|-----------------|-----------|----------|------------------|----------|-----------|
| 24 | 2749.1691 | <b>1375.0882</b> | 2732.1426 | 1366.5749        | 2731.1585 | 1366.0829 | H | 1397.6743        | <b>699.3408</b> | 1380.6477 | 690.8275 | 1379.6637        | 690.3355 | <b>11</b> |
| 25 | 2806.1906 | 1403.5989        | 2789.1640 | 1395.0856        | 2788.1800 | 1394.5936 | G | 1260.6154        | <b>630.8113</b> | 1243.5888 | 622.2980 | <b>1242.6048</b> | 621.8060 | <b>10</b> |
| 26 | 2920.2335 | <b>1460.6204</b> | 2903.2069 | 1452.1071        | 2902.2229 | 1451.6151 | N | <b>1203.5939</b> | <b>602.3006</b> | 1186.5674 | 593.7873 | 1185.5833        | 593.2953 | <b>9</b>  |
| 27 | 3106.3128 | <b>1553.6600</b> | 3089.2863 | 1545.1468        | 3088.3022 | 1544.6548 | W | 1089.5510        | <b>545.2791</b> | 1072.5244 | 536.7659 | 1071.5404        | 536.2738 | <b>8</b>  |
| 28 | 3207.3605 | <b>1604.1839</b> | 3190.3339 | <b>1595.6706</b> | 3189.3499 | 1595.1786 | T | 903.4717         | <b>452.2395</b> | 886.4451  | 443.7262 | 885.4611         | 443.2342 | <b>7</b>  |
| 29 | 3335.4554 | 1668.2314        | 3318.4289 | 1659.7181        | 3317.4449 | 1659.2261 | K | 802.4240         | 401.7156        | 785.3974  | 393.2024 | 784.4134         | 392.7103 | <b>6</b>  |
| 30 | 3448.5395 | <b>1724.7734</b> | 3431.5130 | 1716.2601        | 3430.5289 | 1715.7681 | L | <b>674.3290</b>  | 337.6681        | 657.3025  | 329.1549 | 656.3185         | 328.6629 | <b>5</b>  |
| 31 | 3545.5923 | 1773.2998        | 3528.5657 | 1764.7865        | 3527.5817 | 1764.2945 | P | <b>561.2450</b>  | 281.1261        | 544.2184  | 272.6128 | 543.2344         | 272.1208 | <b>4</b>  |
| 32 | 3674.6349 | 1837.8211        | 3657.6083 | 1829.3078        | 3656.6243 | 1828.8158 | E | 464.1922         | 232.5997        | 447.1656  | 224.0865 | 446.1816         | 223.5945 | <b>3</b>  |
| 33 | 3834.6655 | 1917.8364        | 3817.6390 | 1909.3231        | 3816.6550 | 1908.8311 | C | <b>335.1496</b>  | 168.0784        | 318.1231  | 159.5652 |                  |          | <b>2</b>  |
| 34 |           |                  |           |                  |           |           | R | 175.1190         | 88.0631         | 158.0924  | 79.5498  |                  |          | <b>1</b>  |

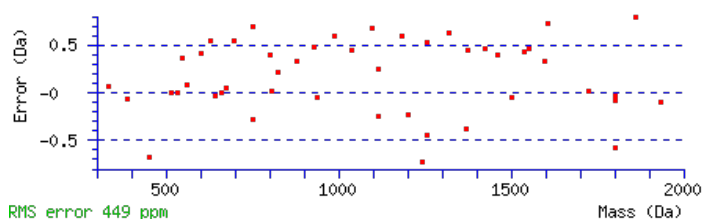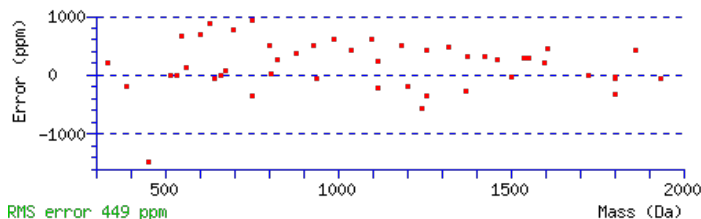

NCBI BLAST search of [DTAVFECLPQHAMFGNDTITCTTHGNWTKLPECR](#)

(Parameters: blastp, nr protein database, expect=20000, no filter, PAM30)

Other BLAST [web gateways](#)

All matches to this query

| Score | Mr(calc)  | Delta   | Sequence                                           | Site Analysis         |
|-------|-----------|---------|----------------------------------------------------|-----------------------|
| 53.5  | 4007.7699 | 1.0112  | <a href="#">DTAVFECLPQHAMFGNDTITCTTHGNWTKLPECR</a> | Deamidated N16 53.39% |
| 52.4  | 4007.7699 | 1.0112  | <a href="#">DTAVFECLPQHAMFGNDTITCTTHGNWTKLPECR</a> | Deamidated N26 41.06% |
| 43.7  | 4007.7699 | 1.0112  | <a href="#">DTAVFECLPQHAMFGNDTITCTTHGNWTKLPECR</a> | Deamidated Q10 5.55%  |
| 22.8  | 4006.7859 | 1.9952  | <a href="#">DTAVFECLPQHAMFGNDTITCTTHGNWTKLPECR</a> |                       |
| 4.4   | 4008.7957 | -0.0145 | <a href="#">EQQRPPRPQQQQQQQQWSNLGRQVAERSSGGR</a>   |                       |
| 4.4   | 4008.7957 | -0.0145 | <a href="#">EQQRPPRPQQQQQQQQWSNLGRQVAERSSGGR</a>   |                       |
| 4.4   | 4008.7957 | -0.0145 | <a href="#">EQQRPPRPQQQQQQQQWSNLGRQVAERSSGGR</a>   |                       |
| 4.4   | 4008.7957 | -0.0145 | <a href="#">EQQRPPRPQQQQQQQQWSNLGRQVAERSSGGR</a>   |                       |
| 4.4   | 4008.7957 | -0.0145 | <a href="#">EQQRPPRPQQQQQQQQWSNLGRQVAERSSGGR</a>   |                       |
| 4.4   | 4008.7957 | -0.0145 | <a href="#">EQQRPPRPQQQQQQQQWSNLGRQVAERSSGGR</a>   |                       |

Mascot: <http://www.matrixscience.com/>

# MASCOT SCIENCE Mascot Search Results

## Peptide View

MS/MS Fragmentation of **DTAVFECLPQHAMFGNDTITCTTHGNWTK**

Found in **J3QLI0** in **con\_Xuniprot\_HUMAN3**, J3QLI0\_HUMAN Beta-2-glycoprotein 1 (Fragment) OS=Homo sapiens GN=APOH PE=2 SV=1

Match to Query 27558: 3369.470502 from(1124.164110,3+) intensity(8820.1172) rtinseconds(1637) scans(4117) index(26683)

Title: 111019\_Est\_MI\_YS\_G\_09Spectrum3569\_scans\_\_4117

Data file C:\mascot\20140703\_Tmgf\_1D\CSV\_UseAnalysis\MasterCSV\All\_Glyco\mgf\ptm\UC18ERLIC\_PTM\_35D.mgf

Click mouse within plot area to zoom in by factor of two about that point

Or, to Da

Label all possible matches Label matches used for scoring

Show Y-axis

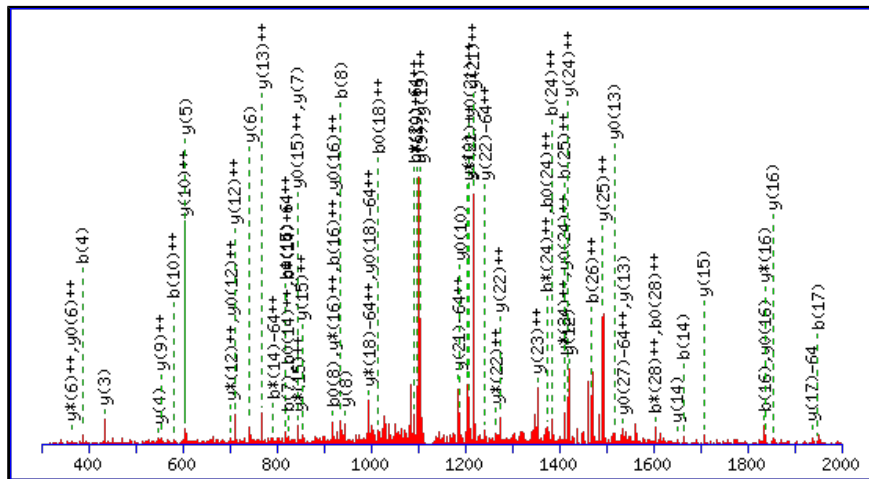

Monoisotopic mass of neutral peptide Mr(calc): 3368.4537

Fixed modifications: Carbamidomethyl (C) (apply to specified residues or termini only)

Variable modifications:

M13 : Oxidation (M), with neutral losses 0.0000 (shown in table), 63.9983

N26 : Deamidated (NQ)

Ions Score: 45 Expect: 0.0024

Matches : 70/484 fragment ions using 136 most intense peaks ([help](#))

| #  | b                | b <sup>++</sup> | b*        | b <sup>*++</sup> | b <sup>0</sup>  | b <sup>0++</sup> | Seq. | y                | y <sup>++</sup>  | y*               | y <sup>*++</sup> | y <sup>0</sup>   | y <sup>0++</sup> | #  |
|----|------------------|-----------------|-----------|------------------|-----------------|------------------|------|------------------|------------------|------------------|------------------|------------------|------------------|----|
| 1  | 116.0342         | 58.5207         |           |                  | 98.0237         | 49.5155          | D    |                  |                  |                  |                  |                  |                  | 29 |
| 2  | 217.0819         | 109.0446        |           |                  | 199.0713        | 100.0393         | T    | 3254.4340        | 1627.7206        | 3237.4074        | 1619.2074        | 3236.4234        | 1618.7153        | 28 |
| 3  | 288.1190         | 144.5631        |           |                  | 270.1084        | 135.5579         | A    | 3153.3863        | 1577.1968        | 3136.3598        | 1568.6835        | 3135.3757        | 1568.1915        | 27 |
| 4  | <b>387.1874</b>  | 194.0974        |           |                  | 369.1769        | 185.0921         | V    | 3082.3492        | 1541.6782        | 3065.3226        | 1533.1650        | 3064.3386        | 1532.6730        | 26 |
| 5  | 534.2558         | 267.6316        |           |                  | 516.2453        | 258.6263         | F    | 2983.2808        | <b>1492.1440</b> | 2966.2542        | 1483.6308        | 2965.2702        | 1483.1387        | 25 |
| 6  | 663.2984         | 332.1529        |           |                  | 645.2879        | 323.1476         | E    | 2836.2124        | <b>1418.6098</b> | 2819.1858        | <b>1410.0965</b> | 2818.2018        | <b>1409.6045</b> | 24 |
| 7  | <b>823.3291</b>  | 412.1682        |           |                  | 805.3185        | 403.1629         | C    | 2707.1698        | <b>1354.0885</b> | 2690.1432        | 1345.5752        | 2689.1592        | 1345.0832        | 23 |
| 8  | <b>936.4131</b>  | 468.7102        |           |                  | <b>918.4026</b> | 459.7049         | L    | 2547.1391        | <b>1274.0732</b> | 2530.1126        | <b>1265.5599</b> | 2529.1286        | 1265.0679        | 22 |
| 9  | 1033.4659        | 517.2366        |           |                  | 1015.4553       | 508.2313         | P    | 2434.0551        | <b>1217.5312</b> | 2417.0285        | <b>1209.0179</b> | 2416.0445        | <b>1208.5259</b> | 21 |
| 10 | 1161.5245        | <b>581.2659</b> | 1144.4979 | 572.7526         | 1143.5139       | 572.2606         | Q    | 2337.0023        | 1169.0048        | 2319.9757        | 1160.4915        | 2318.9917        | 1159.9995        | 20 |
| 11 | 1298.5834        | 649.7953        | 1281.5569 | 641.2821         | 1280.5728       | 640.7901         | H    | 2208.9437        | <b>1104.9755</b> | 2191.9172        | <b>1096.4622</b> | 2190.9332        | 1095.9702        | 19 |
| 12 | 1369.6205        | 685.3139        | 1352.5940 | 676.8006         | 1351.6099       | 676.3086         | A    | 2071.8848        | 1036.4460        | 2054.8583        | 1027.9328        | 2053.8742        | 1027.4408        | 18 |
| 13 | 1516.6559        | 758.8316        | 1499.6294 | 750.3183         | 1498.6453       | 749.8263         | M    | 2000.8477        | 1000.9275        | 1983.8211        | 992.4142         | 1982.8371        | 991.9222         | 17 |
| 14 | <b>1663.7243</b> | 832.3658        | 1646.6978 | <b>823.8525</b>  | 1645.7138       | <b>823.3605</b>  | F    | <b>1853.8123</b> | 927.4098         | <b>1836.7857</b> | <b>918.8965</b>  | <b>1835.8017</b> | <b>918.4045</b>  | 16 |
| 15 | 1720.7458        | 860.8765        | 1703.7192 | 852.3633         | 1702.7352       | 851.8713         | G    | <b>1706.7439</b> | <b>853.8756</b>  | 1689.7173        | <b>845.3623</b>  | 1688.7333        | <b>844.8703</b>  | 15 |
| 16 | <b>1834.7887</b> | <b>917.8980</b> | 1817.7622 | 909.3847         | 1816.7782       | 908.8927         | N    | <b>1649.7224</b> | 825.3648         | 1632.6959        | 816.8516         | 1631.7118        | 816.3596         | 14 |
| 17 | <b>1949.8157</b> | 975.4115        | 1932.7891 | 966.8982         | 1931.8051       | 966.4062         | D    | <b>1535.6795</b> | <b>768.3434</b>  | 1518.6529        | 759.8301         | <b>1517.6689</b> | 759.3381         | 13 |
| 18 | 2050.8633        | 1025.9353       | 2033.8368 | 1017.4220        | 2032.8528       | <b>1016.9300</b> | T    | <b>1420.6525</b> | <b>710.8299</b>  | 1403.6260        | <b>702.3166</b>  | 1402.6420        | <b>701.8246</b>  | 12 |
| 19 | 2163.9474        | 1082.4773       | 2146.9209 | 1073.9641        | 2145.9368       | 1073.4721        | I    | 1319.6049        | 660.3061         | 1302.5783        | 651.7928         | 1301.5943        | 651.3008         | 11 |
| 20 | 2264.9951        | 1133.0012       | 2247.9685 | 1124.4879        | 2246.9845       | 1123.9959        | T    | <b>1206.5208</b> | <b>603.7640</b>  | 1189.4943        | 595.2508         | <b>1188.5102</b> | 594.7588         | 10 |
| 21 | 2425.0257        | 1213.0165       | 2407.9992 | 1204.5032        | 2407.0152       | 1204.0112        | C    | <b>1105.4731</b> | <b>553.2402</b>  | 1088.4466        | 544.7269         | 1087.4626        | 544.2349         | 9  |
| 22 | 2526.0734        | 1263.5403       | 2509.0469 | 1255.0271        | 2508.0628       | 1254.5351        | T    | <b>945.4425</b>  | 473.2249         | 928.4159         | 464.7116         | 927.4319         | 464.2196         | 8  |

|    |           |           |           |           |           |           |   |          |          |          |          |          |          |   |
|----|-----------|-----------|-----------|-----------|-----------|-----------|---|----------|----------|----------|----------|----------|----------|---|
| 23 | 2627.1211 | 1314.0642 | 2610.0945 | 1305.5509 | 2609.1105 | 1305.0589 | T | 844.3948 | 422.7010 | 827.3682 | 414.1878 | 826.3842 | 413.6958 | 7 |
| 24 | 2764.1800 | 1382.5936 | 2747.1535 | 1374.0804 | 2746.1694 | 1373.5884 | H | 743.3471 | 372.1772 | 726.3206 | 363.6639 | 725.3365 | 363.1719 | 6 |
| 25 | 2821.2015 | 1411.1044 | 2804.1749 | 1402.5911 | 2803.1909 | 1402.0991 | G | 606.2882 | 303.6477 | 589.2617 | 295.1345 | 588.2776 | 294.6425 | 5 |
| 26 | 2936.2284 | 1468.6178 | 2919.2019 | 1460.1046 | 2918.2178 | 1459.6126 | N | 549.2667 | 275.1370 | 532.2402 | 266.6237 | 531.2562 | 266.1317 | 4 |
| 27 | 3122.3077 | 1561.6575 | 3105.2812 | 1553.1442 | 3104.2972 | 1552.6522 | W | 434.2398 | 217.6235 | 417.2132 | 209.1103 | 416.2292 | 208.6183 | 3 |
| 28 | 3223.3554 | 1612.1813 | 3206.3289 | 1603.6681 | 3205.3448 | 1603.1761 | T | 248.1605 | 124.5839 | 231.1339 | 116.0706 | 230.1499 | 115.5786 | 2 |
| 29 |           |           |           |           |           |           | K | 147.1128 | 74.0600  | 130.0863 | 65.5468  |          |          | 1 |

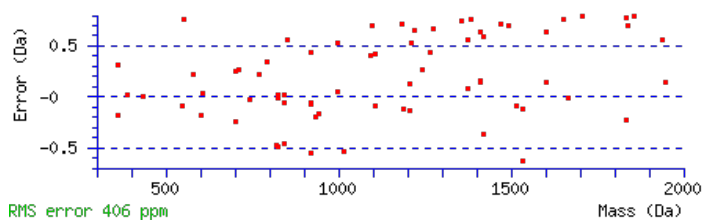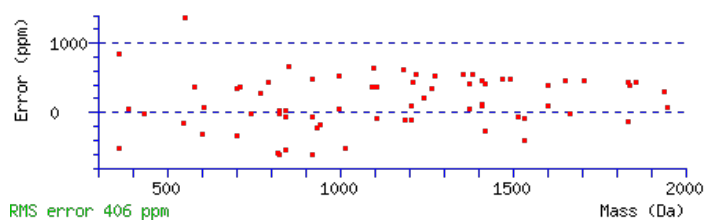

NCBI BLAST search of [DTAVFECLPQHAMEFGNDTITCTTHGNWTK](#)  
 (Parameters: blastp, nr protein database, expect=20000, no filter, PAM30)  
 Other BLAST [web gateways](#)

All matches to this query

| Score | Mr(calc)  | Delta  | Sequence                                         | Site Analysis         |
|-------|-----------|--------|--------------------------------------------------|-----------------------|
| 45.2  | 3368.4537 | 1.0168 | <a href="#">DTAVFECLPQHAMEFGNDTITCTTHGNWTK</a>   | Deamidated N26 99.40% |
| 21.8  | 3368.4537 | 1.0168 | <a href="#">DTAVFECLPQHAMEFGNDTITCTTHGNWTK</a>   | Deamidated N16 0.46%  |
| 16.7  | 3368.4537 | 1.0168 | <a href="#">DTAVFECLPQHAMEFGNDTITCTTHGNWTK</a>   | Deamidated Q10 0.14%  |
| 2.2   | 3367.4697 | 2.0008 | <a href="#">DTAVFECLPQHAMEFGNDTITCTTHGNWTK</a>   |                       |
| 1.7   | 3368.4589 | 1.0116 | <a href="#">TSDMTSPRSGMPSSSTNGSLTSSTAGLTSMCR</a> |                       |
| 1.0   | 3367.4478 | 2.0227 | <a href="#">GPMMSGHCNCPLQRYPNEEVMNGDKQFIR</a>    |                       |
| 1.0   | 3367.4478 | 2.0227 | <a href="#">GPMMSGHCNCPLQRYPNEEVMNGDKQFIR</a>    |                       |
| 0.8   | 3368.4589 | 1.0116 | <a href="#">TSDMTSPRSGMPSSSTNGSLTSSTAGLTSMCR</a> |                       |
| 0.7   | 3367.4478 | 2.0227 | <a href="#">GPMMSGHCNCPLQRYPNEEVMNGDKQFIR</a>    |                       |

Mascot: <http://www.matrixscience.com/>

# MASCOT SCIENCE Mascot Search Results

## Peptide View

MS/MS Fragmentation of **DTAVFECLPQHAMFGNDTITCTTHGNWTKLPECR**

Found in **J3QL10** in **con\_Xuniprot\_HUMAN3**, J3QL10\_HUMAN Beta-2-glycoprotein 1 (Fragment) OS=Homo sapiens GN=APOH PE=2 SV=1

Match to Query 28289: 4008.755776 from(1003.196220,4+) intensity(16854.0879) rtinseconds(1951) scans(5083) index(16006)

Title: 111019\_Est\_ML\_YP\_G\_05Spectrum4316\_scans\_\_5083

Data file C:\mascot\20140703\_Tmgf\_1D\CSV\_UseAnalysis\MasterCSV\All\_Glyco\mgf\ptm\UC18ERLIC\_PTM\_35D.mgf

Click mouse within plot area to zoom in by factor of two about that point

Or, to Da

Label all possible matches Label matches used for scoring

Show Y-axis

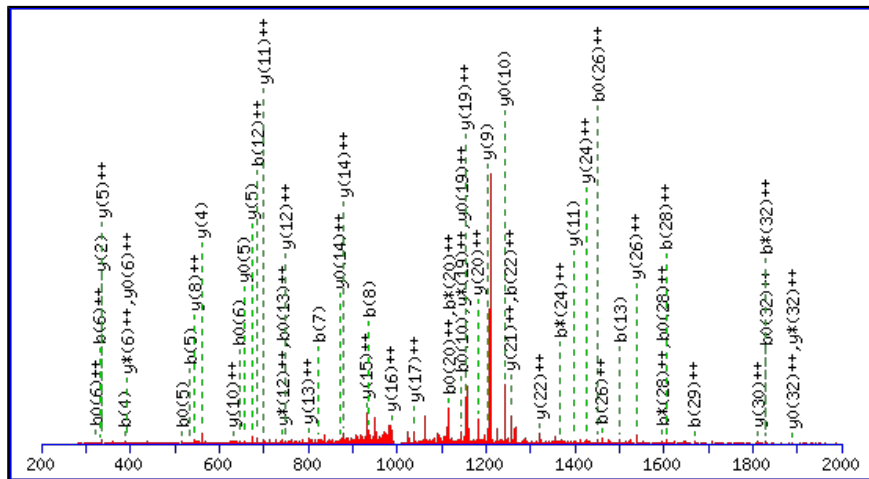

Monoisotopic mass of neutral peptide Mr(calc): 4008.7540

Fixed modifications: Carbamidomethyl (C) (apply to specified residues or termini only)

Variable modifications:

Q10 : Deamidated (NQ)

N16 : Deamidated (NQ)

Ions Score: 41 Expect: 0.0061

Matches : 56/374 fragment ions using 154 most intense peaks ([help](#))

| #  | b         | b <sup>++</sup> | b <sup>*</sup> | b <sup>*++</sup> | b <sup>0</sup> | b <sup>0++</sup> | Seq. | y         | y <sup>++</sup> | y <sup>*</sup> | y <sup>*++</sup> | y <sup>0</sup> | y <sup>0++</sup> | #  |
|----|-----------|-----------------|----------------|------------------|----------------|------------------|------|-----------|-----------------|----------------|------------------|----------------|------------------|----|
| 1  | 116.0342  | 58.5207         |                |                  | 98.0237        | 49.5155          | D    |           |                 |                |                  |                |                  | 34 |
| 2  | 217.0819  | 109.0446        |                |                  | 199.0713       | 100.0393         | T    | 3894.7343 | 1947.8708       | 3877.7077      | 1939.3575        | 3876.7237      | 1938.8655        | 33 |
| 3  | 288.1190  | 144.5631        |                |                  | 270.1084       | 135.5579         | A    | 3793.6866 | 1897.3469       | 3776.6600      | 1888.8337        | 3775.6760      | 1888.3417        | 32 |
| 4  | 387.1874  | 194.0974        |                |                  | 369.1769       | 185.0921         | V    | 3722.6495 | 1861.8284       | 3705.6229      | 1853.3151        | 3704.6389      | 1852.8231        | 31 |
| 5  | 534.2558  | 267.6316        |                |                  | 516.2453       | 258.6263         | F    | 3623.5811 | 1812.2942       | 3606.5545      | 1803.7809        | 3605.5705      | 1803.2889        | 30 |
| 6  | 663.2984  | 332.1529        |                |                  | 645.2879       | 323.1476         | E    | 3476.5126 | 1738.7600       | 3459.4861      | 1730.2467        | 3458.5021      | 1729.7547        | 29 |
| 7  | 823.3291  | 412.1682        |                |                  | 805.3185       | 403.1629         | C    | 3347.4701 | 1674.2387       | 3330.4435      | 1665.7254        | 3329.4595      | 1665.2334        | 28 |
| 8  | 936.4131  | 468.7102        |                |                  | 918.4026       | 459.7049         | L    | 3187.4394 | 1594.2233       | 3170.4129      | 1585.7101        | 3169.4288      | 1585.2181        | 27 |
| 9  | 1033.4659 | 517.2366        |                |                  | 1015.4553      | 508.2313         | P    | 3074.3553 | 1537.6813       | 3057.3288      | 1529.1680        | 3056.3448      | 1528.6760        | 26 |
| 10 | 1162.5085 | 581.7579        | 1145.4820      | 573.2446         | 1144.4979      | 572.7526         | Q    | 2977.3026 | 1489.1549       | 2960.2760      | 1480.6417        | 2959.2920      | 1480.1496        | 25 |
| 11 | 1299.5674 | 650.2873        | 1282.5409      | 641.7741         | 1281.5569      | 641.2821         | H    | 2848.2600 | 1424.6336       | 2831.2334      | 1416.1204        | 2830.2494      | 1415.6283        | 24 |
| 12 | 1370.6045 | 685.8059        | 1353.5780      | 677.2926         | 1352.5940      | 676.8006         | A    | 2711.2011 | 1356.1042       | 2694.1745      | 1347.5909        | 2693.1905      | 1347.0989        | 23 |
| 13 | 1501.6450 | 751.3261        | 1484.6185      | 742.8129         | 1483.6345      | 742.3209         | M    | 2640.1640 | 1320.5856       | 2623.1374      | 1312.0723        | 2622.1534      | 1311.5803        | 22 |
| 14 | 1648.7134 | 824.8604        | 1631.6869      | 816.3471         | 1630.7029      | 815.8551         | F    | 2509.1235 | 1255.0654       | 2492.0969      | 1246.5521        | 2491.1129      | 1246.0601        | 21 |
| 15 | 1705.7349 | 853.3711        | 1688.7083      | 844.8578         | 1687.7243      | 844.3658         | G    | 2362.0551 | 1181.5312       | 2345.0285      | 1173.0179        | 2344.0445      | 1172.5259        | 20 |
| 16 | 1820.7618 | 910.8846        | 1803.7353      | 902.3713         | 1802.7513      | 901.8793         | N    | 2305.0336 | 1153.0204       | 2288.0070      | 1144.5072        | 2287.0230      | 1144.0152        | 19 |
| 17 | 1935.7888 | 968.3980        | 1918.7622      | 959.8848         | 1917.7782      | 959.3927         | D    | 2190.0067 | 1095.5070       | 2172.9801      | 1086.9937        | 2171.9961      | 1086.5017        | 18 |
| 18 | 2036.8365 | 1018.9219       | 2019.8099      | 1010.4086        | 2018.8259      | 1009.9166        | T    | 2074.9797 | 1037.9935       | 2057.9532      | 1029.4802        | 2056.9691      | 1028.9882        | 17 |
| 19 | 2149.9205 | 1075.4639       | 2132.8940      | 1066.9506        | 2131.9100      | 1066.4586        | I    | 1973.9320 | 987.4697        | 1956.9055      | 978.9564         | 1955.9215      | 978.4644         | 16 |
| 20 | 2250.9682 | 1125.9877       | 2233.9417      | 1117.4745        | 2232.9576      | 1116.9825        | T    | 1860.8480 | 930.9276        | 1843.8214      | 922.4143         | 1842.8374      | 921.9223         | 15 |
| 21 | 2410.9988 | 1206.0031       | 2393.9723      | 1197.4898        | 2392.9883      | 1196.9978        | C    | 1759.8003 | 880.4038        | 1742.7737      | 871.8905         | 1741.7897      | 871.3985         | 14 |
| 22 | 2512.0465 | 1256.5269       | 2495.0200      | 1248.0136        | 2494.0360      | 1247.5216        | T    | 1599.7696 | 800.3885        | 1582.7431      | 791.8752         | 1581.7591      | 791.3832         | 13 |

|    |           |           |           |           |           |           |   |           |          |           |          |           |          |    |
|----|-----------|-----------|-----------|-----------|-----------|-----------|---|-----------|----------|-----------|----------|-----------|----------|----|
| 23 | 2613.0942 | 1307.0507 | 2596.0677 | 1298.5375 | 2595.0836 | 1298.0455 | T | 1498.7220 | 749.8646 | 1481.6954 | 741.3513 | 1480.7114 | 740.8593 | 12 |
| 24 | 2750.1531 | 1375.5802 | 2733.1266 | 1367.0669 | 2732.1426 | 1366.5749 | H | 1397.6743 | 699.3408 | 1380.6477 | 690.8275 | 1379.6637 | 690.3355 | 11 |
| 25 | 2807.1746 | 1404.0909 | 2790.1480 | 1395.5777 | 2789.1640 | 1395.0856 | G | 1260.6154 | 630.8113 | 1243.5888 | 622.2980 | 1242.6048 | 621.8060 | 10 |
| 26 | 2921.2175 | 1461.1124 | 2904.1910 | 1452.5991 | 2903.2069 | 1452.1071 | N | 1203.5939 | 602.3006 | 1186.5674 | 593.7873 | 1185.5833 | 593.2953 | 9  |
| 27 | 3107.2968 | 1554.1520 | 3090.2703 | 1545.6388 | 3089.2863 | 1545.1468 | W | 1089.5510 | 545.2791 | 1072.5244 | 536.7659 | 1071.5404 | 536.2738 | 8  |
| 28 | 3208.3445 | 1604.6759 | 3191.3180 | 1596.1626 | 3190.3339 | 1595.6706 | T | 903.4717  | 452.2395 | 886.4451  | 443.7262 | 885.4611  | 443.2342 | 7  |
| 29 | 3336.4395 | 1668.7234 | 3319.4129 | 1660.2101 | 3318.4289 | 1659.7181 | K | 802.4240  | 401.7156 | 785.3974  | 393.2024 | 784.4134  | 392.7103 | 6  |
| 30 | 3449.5235 | 1725.2654 | 3432.4970 | 1716.7521 | 3431.5130 | 1716.2601 | L | 674.3290  | 337.6681 | 657.3025  | 329.1549 | 656.3185  | 328.6629 | 5  |
| 31 | 3546.5763 | 1773.7918 | 3529.5497 | 1765.2785 | 3528.5657 | 1764.7865 | P | 561.2450  | 281.1261 | 544.2184  | 272.6128 | 543.2344  | 272.1208 | 4  |
| 32 | 3675.6189 | 1838.3131 | 3658.5923 | 1829.7998 | 3657.6083 | 1829.3078 | E | 464.1922  | 232.5997 | 447.1656  | 224.0865 | 446.1816  | 223.5945 | 3  |
| 33 | 3835.6495 | 1918.3284 | 3818.6230 | 1909.8151 | 3817.6390 | 1909.3231 | C | 335.1496  | 168.0784 | 318.1231  | 159.5652 |           |          | 2  |
| 34 |           |           |           |           |           |           | R | 175.1190  | 88.0631  | 158.0924  | 79.5498  |           |          | 1  |

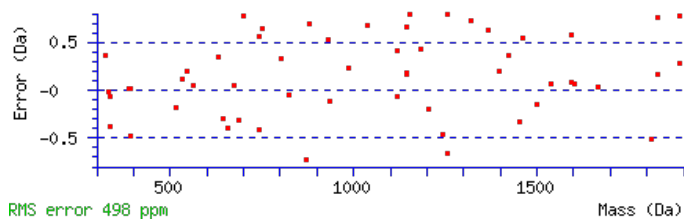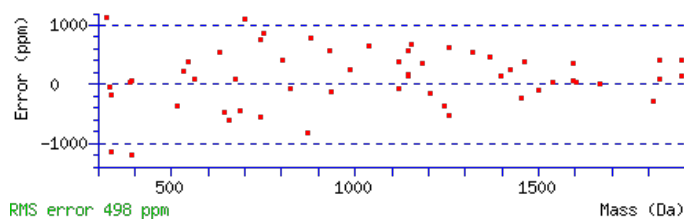

NCBI BLAST search of [DTAVFECLPQHAMFGNDTITCTTHGNWTKLPECR](#)

(Parameters: blastp, nr protein database, expect=20000, no filter, PAM30)

Other BLAST [web gateways](#)

All matches to this query

| Score | Mr(calc)  | Delta   | Sequence                                              | Site Analysis              |
|-------|-----------|---------|-------------------------------------------------------|----------------------------|
| 41.5  | 4008.7540 | 0.0018  | <a href="#">DTAVFECLPQHAMFGNDTITCTTHGNWTKLPECR</a>    | Deamidated Q10, N16 53.12% |
| 40.2  | 4008.7540 | 0.0018  | <a href="#">DTAVFECLPQHAMFGNDTITCTTHGNWTKLPECR</a>    | Deamidated N16, N26 39.56% |
| 39.8  | 4007.7699 | 0.9858  | <a href="#">DTAVFECLPQHAMFGNDTITCTTHGNWTKLPECR</a>    |                            |
| 32.9  | 4008.7540 | 0.0018  | <a href="#">DTAVFECLPQHAMFGNDTITCTTHGNWTKLPECR</a>    | Deamidated Q10, N26 7.32%  |
| 27.3  | 4007.7699 | 0.9858  | <a href="#">DTAVFECLPQHAMFGNDTITCTTHGNWTKLPECR</a>    |                            |
| 16.4  | 4007.7699 | 0.9858  | <a href="#">DTAVFECLPQHAMFGNDTITCTTHGNWTKLPECR</a>    |                            |
| 6.3   | 4007.7589 | 0.9969  | <a href="#">DTNDDPDEDHLTSYDIQLSIOESIEASKTALCPER</a>   |                            |
| 5.5   | 4007.7711 | 0.9847  | <a href="#">AVEMTDQLMVPTLGSQEGAFENVRMNYSGDQGQTIR</a>  |                            |
| 4.8   | 4006.7684 | 1.9874  | <a href="#">TNEGNAMSQSLVLYGASKENSEGFHESKMTNTEGVNK</a> |                            |
| 2.9   | 4008.7752 | -0.0195 | <a href="#">SCFNFLDELSPGLLEMVMVNYDGEAGCWKISPIGC</a>   |                            |

Mascot: <http://www.matrixscience.com/>

# MASCOT SCIENCE Mascot Search Results

## Peptide View

MS/MS Fragmentation of **LPPGLLANFTLLR**

Found in **P02750** in **con\_Xuniprot\_HUMAN3**, A2GL\_HUMAN Leucine-rich alpha-2-glycoprotein OS=Homo sapiens GN=LRG1 PE=1 SV=2

Match to Query 3177: 1424.842628 from(713.428590,2+) intensity(493325.7500) rtinseconds(2602) scans(6801) index(25654)

Title: 111019\_Est\_MI\_YS\_G\_07Spectrum5862\_scans\_6801

Data file C:\\mascot\\20140703\_Tmgf\_1D\\CSV\_UseAnalysis\\MasterCSV\\All\_Glyco\\mgf\\ptm\\UC18ERLIC\_PTM\_35D.mgf

Click mouse within plot area to zoom in by factor of two about that point

Or, to Da

Label all possible matches Label matches used for scoring

Show Y-axis

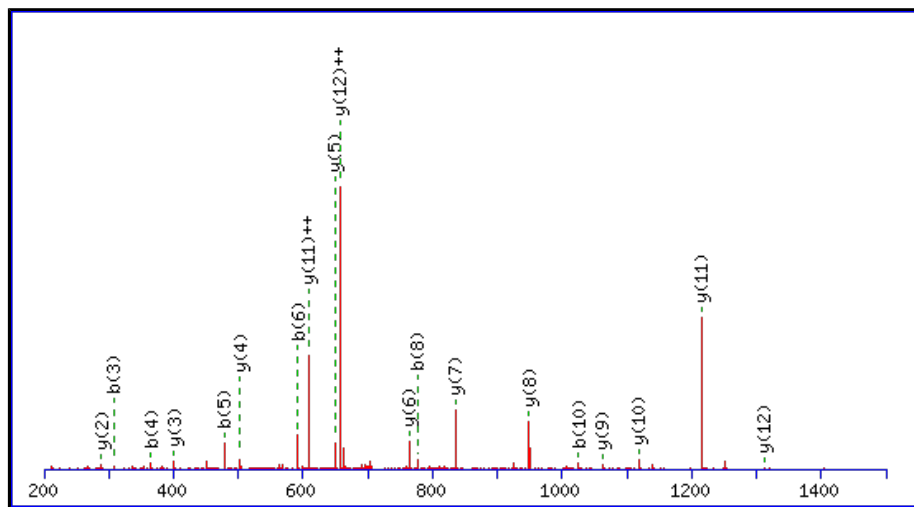

Monoisotopic mass of neutral peptide Mr(calc): 1424.8391

Fixed modifications: Carbamidomethyl (C) (apply to specified residues or termini only)

Variable modifications:

N8 : Deamidated (NQ)

Ions Score: 107 Expect: 7e-010

Matches : 19/106 fragment ions using 24 most intense peaks ([help](#))

| #  | b         | b <sup>++</sup> | b <sup>*</sup> | b <sup>+++</sup> | b <sup>0</sup> | b <sup>0++</sup> | Seq. | y         | y <sup>++</sup> | y <sup>*</sup> | y <sup>+++</sup> | y <sup>0</sup> | y <sup>0++</sup> | #  |
|----|-----------|-----------------|----------------|------------------|----------------|------------------|------|-----------|-----------------|----------------|------------------|----------------|------------------|----|
| 1  | 114.0913  | 57.5493         |                |                  |                |                  | L    |           |                 |                |                  |                |                  | 13 |
| 2  | 211.1441  | 106.0757        |                |                  |                |                  | P    | 1312.7623 | 656.8848        | 1295.7358      | 648.3715         | 1294.7518      | 647.8795         | 12 |
| 3  | 308.1969  | 154.6021        |                |                  |                |                  | P    | 1215.7096 | 608.3584        | 1198.6830      | 599.8452         | 1197.6990      | 599.3531         | 11 |
| 4  | 365.2183  | 183.1128        |                |                  |                |                  | G    | 1118.6568 | 559.8320        | 1101.6303      | 551.3188         | 1100.6463      | 550.8268         | 10 |
| 5  | 478.3024  | 239.6548        |                |                  |                |                  | L    | 1061.6354 | 531.3213        | 1044.6088      | 522.8080         | 1043.6248      | 522.3160         | 9  |
| 6  | 591.3865  | 296.1969        |                |                  |                |                  | L    | 948.5513  | 474.7793        | 931.5247       | 466.2660         | 930.5407       | 465.7740         | 8  |
| 7  | 662.4236  | 331.7154        |                |                  |                |                  | A    | 835.4672  | 418.2373        | 818.4407       | 409.7240         | 817.4567       | 409.2320         | 7  |
| 8  | 777.4505  | 389.2289        | 760.4240       | 380.7156         |                |                  | N    | 764.4301  | 382.7187        | 747.4036       | 374.2054         | 746.4196       | 373.7134         | 6  |
| 9  | 924.5189  | 462.7631        | 907.4924       | 454.2498         |                |                  | F    | 649.4032  | 325.2052        | 632.3766       | 316.6919         | 631.3926       | 316.1999         | 5  |
| 10 | 1025.5666 | 513.2869        | 1008.5401      | 504.7737         | 1007.5560      | 504.2817         | T    | 502.3348  | 251.6710        | 485.3082       | 243.1577         | 484.3242       | 242.6657         | 4  |
| 11 | 1138.6507 | 569.8290        | 1121.6241      | 561.3157         | 1120.6401      | 560.8237         | L    | 401.2871  | 201.1472        | 384.2605       | 192.6339         |                |                  | 3  |
| 12 | 1251.7347 | 626.3710        | 1234.7082      | 617.8577         | 1233.7242      | 617.3657         | L    | 288.2030  | 144.6051        | 271.1765       | 136.0919         |                |                  | 2  |
| 13 |           |                 |                |                  |                |                  | R    | 175.1190  | 88.0631         | 158.0924       | 79.5498          |                |                  | 1  |

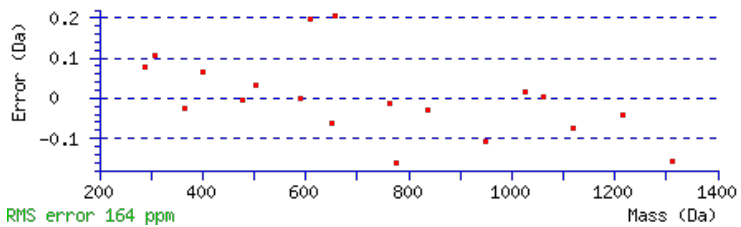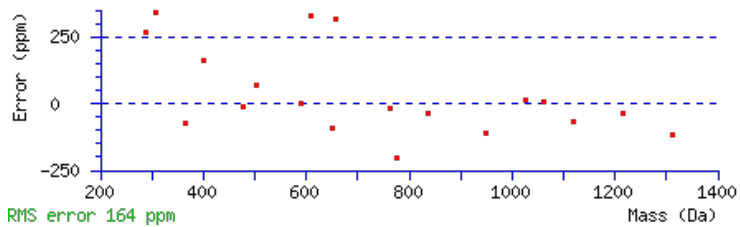

NCBI **BLAST** search of [LPPGLLANFTLLR](#)

(Parameters: blastp, nr protein database, expect=20000, no filter, PAM30)

Other BLAST [web gateways](#)

**All matches to this query**

| Score | Mr(calc)  | Delta   | Sequence                      |
|-------|-----------|---------|-------------------------------|
| 107.4 | 1424.8391 | 0.0035  | <a href="#">LPPGLLANFTLLR</a> |
| 4.1   | 1423.8333 | 1.0093  | <a href="#">LLMLHGQKLKSR</a>  |
| 3.3   | 1423.8439 | 0.9988  | <a href="#">IPIGWQIELVKK</a>  |
| 2.7   | 1424.8398 | 0.0028  | <a href="#">LMRNATVVRPLR</a>  |
| 2.7   | 1424.8398 | 0.0028  | <a href="#">NRVATMPVRLLR</a>  |
| 1.5   | 1424.8391 | 0.0035  | <a href="#">LVPPELIVSHPPK</a> |
| 1.4   | 1424.8405 | 0.0022  | <a href="#">LVKPWPVERNIR</a>  |
| 0.3   | 1423.8412 | 1.0015  | <a href="#">IPRHLKQTYIR</a>   |
| 0.3   | 1424.8463 | -0.0037 | <a href="#">LLLAQRNLOSIR</a>  |

**Mascot:** <http://www.matrixscience.com/>



# MATRIX SCIENCE Mascot Search Results

## Peptide View

MS/MS Fragmentation of **KLPPGLLANFTLLR**

Found in **P02750** in **con\_Xuniprot\_HUMAN3**, A2GL\_HUMAN Leucine-rich alpha-2-glycoprotein OS=Homo sapiens GN=LRG1 PE=1 SV=2

Match to Query 7064: 1552.937468 from(777.476010,2+) intensity(2003475.7500) rtinseconds(2266) scans(5827) index(8564)

Title: 111019\_Est\_ISCardio\_NMI\_YS\_G\_3Spectrum5067\_scans\_\_5827

Data file C:\\mascot\\20140703\_Tmgf\_1D\\CSV\_UseAnalysis\\MasterCSV\\All\_Glyco\\mgf\\ptm\\UC18ERLIC\_PTM\_35D.mgf

Click mouse within plot area to zoom in by factor of two about that point

Or, to Da

Label all possible matches Label matches used for scoring

Show Y-axis

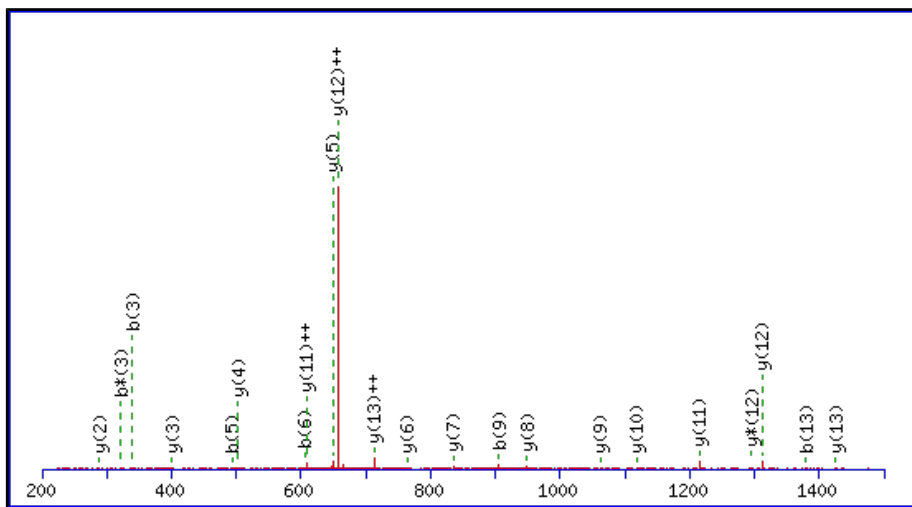

Monoisotopic mass of neutral peptide  $M_r(\text{calc})$ : 1552.9341

Fixed modifications: Carbamidomethyl (C) (apply to specified residues or termini only)

Variable modifications:

N9 : Deamidated (NQ)

Ions Score: 95 Expect: 7.3e-009

Matches : 22/130 fragment ions using 39 most intense peaks ([help](#))

| #  | b         | b <sup>++</sup> | b <sup>*</sup> | b <sup>***</sup> | b <sup>0</sup> | b <sup>0++</sup> | Seq. | y         | y <sup>++</sup> | y <sup>*</sup> | y <sup>***</sup> | y <sup>0</sup> | y <sup>0++</sup> | #  |
|----|-----------|-----------------|----------------|------------------|----------------|------------------|------|-----------|-----------------|----------------|------------------|----------------|------------------|----|
| 1  | 129.1022  | 65.0548         | 112.0757       | 56.5415          |                |                  | K    |           |                 |                |                  |                |                  | 14 |
| 2  | 242.1863  | 121.5968        | 225.1598       | 113.0835         |                |                  | L    | 1425.8464 | 713.4268        | 1408.8199      | 704.9136         | 1407.8358      | 704.4216         | 13 |
| 3  | 339.2391  | 170.1232        | 322.2125       | 161.6099         |                |                  | P    | 1312.7623 | 656.8848        | 1295.7358      | 648.3715         | 1294.7518      | 647.8795         | 12 |
| 4  | 436.2918  | 218.6496        | 419.2653       | 210.1363         |                |                  | P    | 1215.7096 | 608.3584        | 1198.6830      | 599.8452         | 1197.6990      | 599.3531         | 11 |
| 5  | 493.3133  | 247.1603        | 476.2867       | 238.6470         |                |                  | G    | 1118.6568 | 559.8320        | 1101.6303      | 551.3188         | 1100.6463      | 550.8268         | 10 |
| 6  | 606.3974  | 303.7023        | 589.3708       | 295.1890         |                |                  | L    | 1061.6354 | 531.3213        | 1044.6088      | 522.8080         | 1043.6248      | 522.3160         | 9  |
| 7  | 719.4814  | 360.2443        | 702.4549       | 351.7311         |                |                  | L    | 948.5513  | 474.7793        | 931.5247       | 466.2660         | 930.5407       | 465.7740         | 8  |
| 8  | 790.5185  | 395.7629        | 773.4920       | 387.2496         |                |                  | A    | 835.4672  | 418.2373        | 818.4407       | 409.7240         | 817.4567       | 409.2320         | 7  |
| 9  | 905.5455  | 453.2764        | 888.5189       | 444.7631         |                |                  | N    | 764.4301  | 382.7187        | 747.4036       | 374.2054         | 746.4196       | 373.7134         | 6  |
| 10 | 1052.6139 | 526.8106        | 1035.5873      | 518.2973         |                |                  | F    | 649.4032  | 325.2052        | 632.3766       | 316.6919         | 631.3926       | 316.1999         | 5  |
| 11 | 1153.6616 | 577.3344        | 1136.6350      | 568.8212         | 1135.6510      | 568.3291         | T    | 502.3348  | 251.6710        | 485.3082       | 243.1577         | 484.3242       | 242.6657         | 4  |
| 12 | 1266.7456 | 633.8765        | 1249.7191      | 625.3632         | 1248.7351      | 624.8712         | L    | 401.2871  | 201.1472        | 384.2605       | 192.6339         |                |                  | 3  |
| 13 | 1379.8297 | 690.4185        | 1362.8032      | 681.9052         | 1361.8191      | 681.4132         | L    | 288.2030  | 144.6051        | 271.1765       | 136.0919         |                |                  | 2  |
| 14 |           |                 |                |                  |                |                  | R    | 175.1190  | 88.0631         | 158.0924       | 79.5498          |                |                  | 1  |

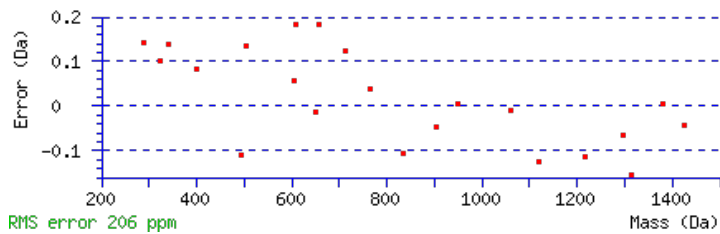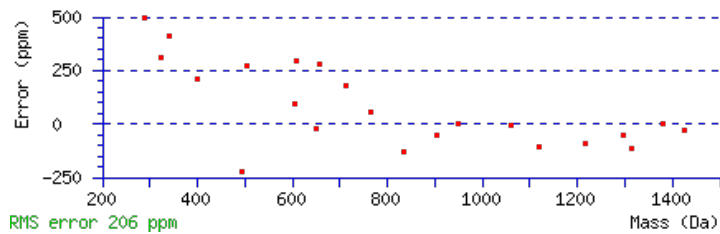

NCBI BLAST search of [KLPPGLLANFTLLR](#)

(Parameters: blastp, nr protein database, expect=20000, no filter, PAM30)

Other BLAST [web gateways](#)

**All matches to this query**

| Score | Mr(calc)  | Delta   | Sequence                        |
|-------|-----------|---------|---------------------------------|
| 94.8  | 1552.9341 | 0.0034  | <a href="#">KLPPGLLANFTLLR</a>  |
| 7.0   | 1552.9413 | -0.0038 | <a href="#">IQNNKLILNKLSR</a>   |
| 5.7   | 1552.9413 | -0.0038 | <a href="#">KLLLAQRNLQSIR</a>   |
| 5.7   | 1552.9301 | 0.0074  | <a href="#">KLNVLVASRETPVK</a>  |
| 3.8   | 1552.9300 | 0.0074  | <a href="#">EIVLKAQILAGGRGK</a> |
| 3.5   | 1552.9413 | -0.0038 | <a href="#">KLLLAQRNLQSIR</a>   |
| 3.5   | 1552.9413 | -0.0038 | <a href="#">KLLLAQRNLQSIR</a>   |
| 3.5   | 1552.9301 | 0.0074  | <a href="#">QLVTGKGTVVVSLPR</a> |
| 3.5   | 1552.9300 | 0.0074  | <a href="#">LQKINAGQRGILK</a>   |
| 3.5   | 1552.9300 | 0.0074  | <a href="#">LQKINAGQRGILK</a>   |

Mascot: <http://www.matrixscience.com/>

# MASCOT SCIENCE Mascot Search Results

## Peptide View

MS/MS Fragmentation of **SDHGSSISCQPPAEIPGYLPADTVHLAVEFFNLTHLPANLLQGASK**

Found in **P02750** in **con\_Xuniprot\_HUMAN3**, A2GL\_HUMAN Leucine-rich alpha-2-glycoprotein OS=Homo sapiens GN=LRG1 PE=1 SV=2

Match to Query 28995: 4899.437576 from(1225.866670,4+) intensity(23810.3164) rtinseconds(2933) scans(7721) index(14844)

Title: 111019\_Est\_MI\_YP\_G\_03Spectrum6744\_scans\_\_7721

Data file C:\mascot\20140703\_Tmgf\_1D\CSV\_UseAnalysis\MasterCSV\All\_Glyco\mgf\ptm\UC18ERLIC\_PTM\_35D.mgf

Click mouse within plot area to zoom in by factor of two about that point

Or, to Da

Label all possible matches Label matches used for scoring

Show Y-axis

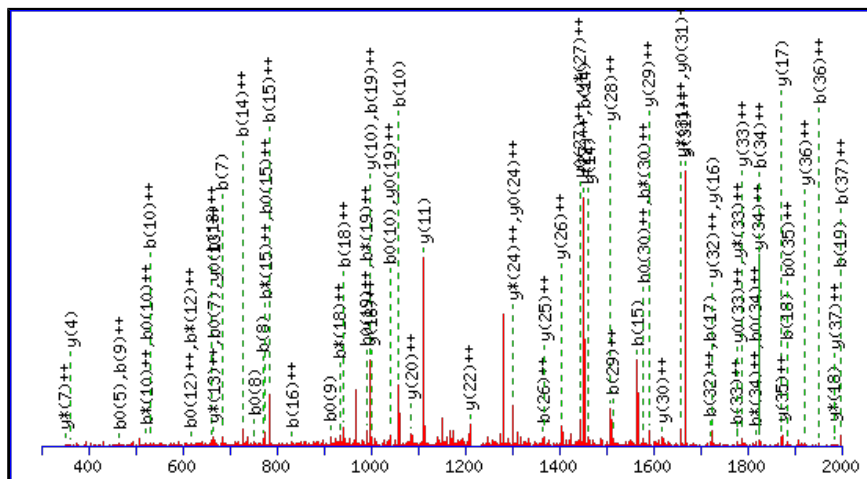

Monoisotopic mass of neutral peptide Mr(calc): 4899.4178

Fixed modifications: Carbamidomethyl (C) (apply to specified residues or termini only)

Variable modifications:

N32 : Deamidated (NQ)

Ions Score: 65 Expect: 4.6e-005

Matches : 77/520 fragment ions using 136 most intense peaks ([help](#))

| #  | b         | b <sup>++</sup> | b <sup>*</sup> | b <sup>*++</sup> | b <sup>0</sup> | b <sup>0++</sup> | Seq. | y         | y <sup>++</sup> | y <sup>*</sup> | y <sup>*++</sup> | y <sup>0</sup> | y <sup>0++</sup> | #  |
|----|-----------|-----------------|----------------|------------------|----------------|------------------|------|-----------|-----------------|----------------|------------------|----------------|------------------|----|
| 1  | 88.0393   | 44.5233         |                |                  | 70.0287        | 35.5180          | S    |           |                 |                |                  |                |                  | 46 |
| 2  | 203.0662  | 102.0368        |                |                  | 185.0557       | 93.0315          | D    | 4813.3930 | 2407.2002       | 4796.3665      | 2398.6869        | 4795.3825      | 2398.1949        | 45 |
| 3  | 340.1252  | 170.5662        |                |                  | 322.1146       | 161.5609         | H    | 4698.3661 | 2349.6867       | 4681.3395      | 2341.1734        | 4680.3555      | 2340.6814        | 44 |
| 4  | 397.1466  | 199.0769        |                |                  | 379.1361       | 190.0717         | G    | 4561.3072 | 2281.1572       | 4544.2806      | 2272.6440        | 4543.2966      | 2272.1519        | 43 |
| 5  | 484.1787  | 242.5930        |                |                  | 466.1681       | 233.5877         | S    | 4504.2857 | 2252.6465       | 4487.2592      | 2244.1332        | 4486.2752      | 2243.6412        | 42 |
| 6  | 571.2107  | 286.1090        |                |                  | 553.2001       | 277.1037         | S    | 4417.2537 | 2209.1305       | 4400.2271      | 2200.6172        | 4399.2431      | 2200.1252        | 41 |
| 7  | 684.2947  | 342.6510        |                |                  | 666.2842       | 333.6457         | I    | 4330.2217 | 2165.6145       | 4313.1951      | 2157.1012        | 4312.2111      | 2156.6092        | 40 |
| 8  | 771.3268  | 386.1670        |                |                  | 753.3162       | 377.1617         | S    | 4217.1376 | 2109.0724       | 4200.1110      | 2100.5592        | 4199.1270      | 2100.0672        | 39 |
| 9  | 931.3574  | 466.1823        |                |                  | 913.3469       | 457.1771         | C    | 4130.1056 | 2065.5564       | 4113.0790      | 2057.0431        | 4112.0950      | 2056.5511        | 38 |
| 10 | 1059.4160 | 530.2116        | 1042.3894      | 521.6984         | 1041.4054      | 521.2064         | Q    | 3970.0749 | 1985.5411       | 3953.0484      | 1977.0278        | 3952.0644      | 1976.5358        | 37 |
| 11 | 1156.4688 | 578.7380        | 1139.4422      | 570.2247         | 1138.4582      | 569.7327         | P    | 3842.0163 | 1921.5118       | 3824.9898      | 1912.9985        | 3824.0058      | 1912.5065        | 36 |
| 12 | 1253.5215 | 627.2644        | 1236.4950      | 618.7511         | 1235.5110      | 618.2591         | P    | 3744.9636 | 1872.9854       | 3727.9370      | 1864.4722        | 3726.9530      | 1863.9801        | 35 |
| 13 | 1324.5586 | 662.7830        | 1307.5321      | 654.2697         | 1306.5481      | 653.7777         | A    | 3647.9108 | 1824.4590       | 3630.8843      | 1815.9458        | 3629.9002      | 1815.4538        | 34 |
| 14 | 1453.6012 | 727.3043        | 1436.5747      | 718.7910         | 1435.5907      | 718.2990         | E    | 3576.8737 | 1788.9405       | 3559.8472      | 1780.4272        | 3558.8631      | 1779.9352        | 33 |
| 15 | 1566.6853 | 783.8463        | 1549.6587      | 775.3330         | 1548.6747      | 774.8410         | I    | 3447.8311 | 1724.4192       | 3430.8046      | 1715.9059        | 3429.8205      | 1715.4139        | 32 |
| 16 | 1663.7381 | 832.3727        | 1646.7115      | 823.8594         | 1645.7275      | 823.3674         | P    | 3334.7470 | 1667.8772       | 3317.7205      | 1659.3639        | 3316.7365      | 1658.8719        | 31 |
| 17 | 1720.7595 | 860.8834        | 1703.7330      | 852.3701         | 1702.7490      | 851.8781         | G    | 3237.6943 | 1619.3508       | 3220.6677      | 1610.8375        | 3219.6837      | 1610.3455        | 30 |
| 18 | 1883.8229 | 942.4151        | 1866.7963      | 933.9018         | 1865.8123      | 933.4098         | Y    | 3180.6728 | 1590.8400       | 3163.6463      | 1582.3268        | 3162.6622      | 1581.8348        | 29 |
| 19 | 1996.9069 | 998.9571        | 1979.8804      | 990.4438         | 1978.8964      | 989.9518         | L    | 3017.6095 | 1509.3084       | 3000.5829      | 1500.7951        | 2999.5989      | 1500.3031        | 28 |
| 20 | 2093.9597 | 1047.4835       | 2076.9331      | 1038.9702        | 2075.9491      | 1038.4782        | P    | 2904.5254 | 1452.7663       | 2887.4989      | 1444.2531        | 2886.5149      | 1443.7611        | 27 |
| 21 | 2164.9968 | 1083.0020       | 2147.9702      | 1074.4888        | 2146.9862      | 1073.9968        | A    | 2807.4727 | 1404.2400       | 2790.4461      | 1395.7267        | 2789.4621      | 1395.2347        | 26 |
| 22 | 2280.0237 | 1140.5155       | 2262.9972      | 1132.0022        | 2262.0132      | 1131.5102        | D    | 2736.4355 | 1368.7214       | 2719.4090      | 1360.2081        | 2718.4250      | 1359.7161        | 25 |
| 23 | 2381.0714 | 1191.0393       | 2364.0449      | 1182.5261        | 2363.0609      | 1182.0341        | T    | 2621.4086 | 1311.2079       | 2604.3821      | 1302.6947        | 2603.3980      | 1302.2027        | 24 |

|    |           |           |           |           |           |           |   |           |           |           |           |           |           |    |
|----|-----------|-----------|-----------|-----------|-----------|-----------|---|-----------|-----------|-----------|-----------|-----------|-----------|----|
| 24 | 2480.1398 | 1240.5736 | 2463.1133 | 1232.0603 | 2462.1293 | 1231.5683 | V | 2520.3609 | 1260.6841 | 2503.3344 | 1252.1708 | 2502.3504 | 1251.6788 | 23 |
| 25 | 2617.1987 | 1309.1030 | 2600.1722 | 1300.5897 | 2599.1882 | 1300.0977 | H | 2421.2925 | 1211.1499 | 2404.2660 | 1202.6366 | 2403.2819 | 1202.1446 | 22 |
| 26 | 2730.2828 | 1365.6450 | 2713.2563 | 1357.1318 | 2712.2722 | 1356.6398 | L | 2284.2336 | 1142.6204 | 2267.2070 | 1134.1072 | 2266.2230 | 1133.6152 | 21 |
| 27 | 2801.3199 | 1401.1636 | 2784.2934 | 1392.6503 | 2783.3094 | 1392.1583 | A | 2171.1495 | 1086.0784 | 2154.1230 | 1077.5651 | 2153.1390 | 1077.0731 | 20 |
| 28 | 2900.3883 | 1450.6978 | 2883.3618 | 1442.1845 | 2882.3778 | 1441.6925 | V | 2100.1124 | 1050.5598 | 2083.0859 | 1042.0466 | 2082.1019 | 1041.5546 | 19 |
| 29 | 3029.4309 | 1515.2191 | 3012.4044 | 1506.7058 | 3011.4204 | 1506.2138 | E | 2001.0440 | 1001.0256 | 1984.0175 | 992.5124  | 1983.0334 | 992.0204  | 18 |
| 30 | 3176.4993 | 1588.7533 | 3159.4728 | 1580.2400 | 3158.4888 | 1579.7480 | F | 1872.0014 | 936.5043  | 1854.9749 | 927.9911  | 1853.9908 | 927.4991  | 17 |
| 31 | 3323.5678 | 1662.2875 | 3306.5412 | 1653.7742 | 3305.5572 | 1653.2822 | F | 1724.9330 | 862.9701  | 1707.9064 | 854.4569  | 1706.9224 | 853.9649  | 16 |
| 32 | 3438.5947 | 1719.8010 | 3421.5682 | 1711.2877 | 3420.5841 | 1710.7957 | N | 1577.8646 | 789.4359  | 1560.8380 | 780.9227  | 1559.8540 | 780.4306  | 15 |
| 33 | 3551.6788 | 1776.3430 | 3534.6522 | 1767.8297 | 3533.6682 | 1767.3377 | L | 1462.8376 | 731.9225  | 1445.8111 | 723.4092  | 1444.8271 | 722.9172  | 14 |
| 34 | 3652.7264 | 1826.8669 | 3635.6999 | 1818.3536 | 3634.7159 | 1817.8616 | T | 1349.7536 | 675.3804  | 1332.7270 | 666.8672  | 1331.7430 | 666.3751  | 13 |
| 35 | 3789.7854 | 1895.3963 | 3772.7588 | 1886.8830 | 3771.7748 | 1886.3910 | H | 1248.7059 | 624.8566  | 1231.6793 | 616.3433  | 1230.6953 | 615.8513  | 12 |
| 36 | 3902.8694 | 1951.9383 | 3885.8429 | 1943.4251 | 3884.8589 | 1942.9331 | L | 1111.6470 | 556.3271  | 1094.6204 | 547.8139  | 1093.6364 | 547.3218  | 11 |
| 37 | 3999.9222 | 2000.4647 | 3982.8956 | 1991.9515 | 3981.9116 | 1991.4594 | P | 998.5629  | 499.7851  | 981.5364  | 491.2718  | 980.5524  | 490.7798  | 10 |
| 38 | 4070.9593 | 2035.9833 | 4053.9327 | 2027.4700 | 4052.9487 | 2026.9780 | A | 901.5102  | 451.2587  | 884.4836  | 442.7454  | 883.4996  | 442.2534  | 9  |
| 39 | 4185.0022 | 2093.0048 | 4167.9757 | 2084.4915 | 4166.9917 | 2083.9995 | N | 830.4730  | 415.7402  | 813.4465  | 407.2269  | 812.4625  | 406.7349  | 8  |
| 40 | 4298.0863 | 2149.5468 | 4281.0597 | 2141.0335 | 4280.0757 | 2140.5415 | L | 716.4301  | 358.7187  | 699.4036  | 350.2054  | 698.4196  | 349.7134  | 7  |
| 41 | 4411.1704 | 2206.0888 | 4394.1438 | 2197.5755 | 4393.1598 | 2197.0835 | L | 603.3461  | 302.1767  | 586.3195  | 293.6634  | 585.3355  | 293.1714  | 6  |
| 42 | 4539.2289 | 2270.1181 | 4522.2024 | 2261.6048 | 4521.2184 | 2261.1128 | Q | 490.2620  | 245.6346  | 473.2354  | 237.1214  | 472.2514  | 236.6293  | 5  |
| 43 | 4596.2504 | 2298.6288 | 4579.2238 | 2290.1156 | 4578.2398 | 2289.6236 | G | 362.2034  | 181.6053  | 345.1769  | 173.0921  | 344.1928  | 172.6001  | 4  |
| 44 | 4667.2875 | 2334.1474 | 4650.2610 | 2325.6341 | 4649.2769 | 2325.1421 | A | 305.1819  | 153.0946  | 288.1554  | 144.5813  | 287.1714  | 144.0893  | 3  |
| 45 | 4754.3195 | 2377.6634 | 4737.2930 | 2369.1501 | 4736.3090 | 2368.6581 | S | 234.1448  | 117.5761  | 217.1183  | 109.0628  | 216.1343  | 108.5708  | 2  |
| 46 |           |           |           |           |           |           | K | 147.1128  | 74.0600   | 130.0863  | 65.5468   |           |           | 1  |

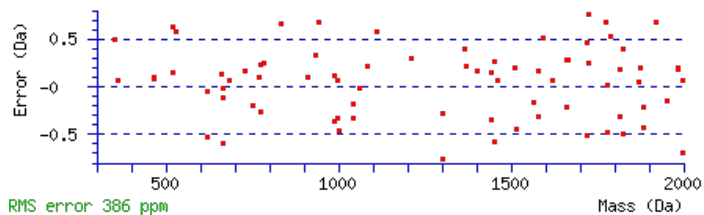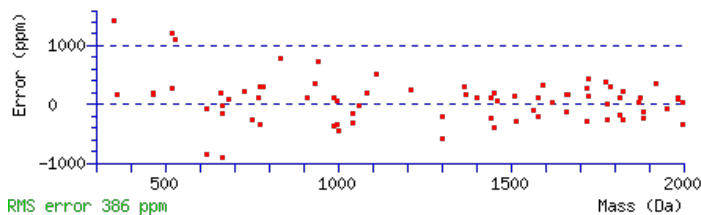

NCBI BLAST search of [SDHGSSISCOPPAEIPGYLPADTVHLAVEFFNLTHLPANLLQGASK](#)

(Parameters: blastp, nr protein database, expect=20000, no filter, PAM30)

Other BLAST [web gateways](#)

All matches to this query

| Score | Mr(calc)  | Delta  | Sequence                                                       | Site Analysis         |
|-------|-----------|--------|----------------------------------------------------------------|-----------------------|
| 65.5  | 4899.4178 | 0.0198 | <a href="#">SDHGSSISCOPPAEIPGYLPADTVHLAVEFFNLTHLPANLLQGASK</a> | Deamidated N32 84.71% |
| 54.9  | 4899.4178 | 0.0198 | <a href="#">SDHGSSISCOPPAEIPGYLPADTVHLAVEFFNLTHLPANLLQGASK</a> | Deamidated Q42 7.50%  |
| 54.9  | 4899.4178 | 0.0198 | <a href="#">SDHGSSISCOPPAEIPGYLPADTVHLAVEFFNLTHLPANLLQGASK</a> | Deamidated N39 7.50%  |
| 40.8  | 4899.4178 | 0.0198 | <a href="#">SDHGSSISCOPPAEIPGYLPADTVHLAVEFFNLTHLPANLLQGASK</a> | Deamidated Q10 0.29%  |
| 40.7  | 4898.4338 | 1.0038 | <a href="#">SDHGSSISCOPPAEIPGYLPADTVHLAVEFFNLTHLPANLLQGASK</a> |                       |
| 19.4  | 4899.4355 | 0.0020 | <a href="#">ENSTKVVFLITDGYSNGGDRPIAASLRDSGVEIFTFGIWQGNIR</a>   |                       |
| 16.5  | 4898.4515 | 0.9861 | <a href="#">ENSTKVVFLITDGYSNGGDRPIAASLRDSGVEIFTFGIWQGNIR</a>   |                       |
| 15.2  | 4898.4319 | 1.0057 | <a href="#">VGAGLELEMVEMESEPMWFAVTHDPTLSETLALLEPKNVLGKLAS</a>  |                       |
| 14.9  | 4898.4515 | 0.9861 | <a href="#">ENSTKVVFLITDGYSNGGDRPIAASLRDSGVEIFTFGIWQGNIR</a>   |                       |
| 14.4  | 4899.4355 | 0.0020 | <a href="#">ENSTKVVFLITDGYSNGGDRPIAASLRDSGVEIFTFGIWQGNIR</a>   |                       |

Mascot: <http://www.matrixscience.com/>

# MATRIX SCIENCE Mascot Search Results

## Peptide View

MS/MS Fragmentation of **LRKLPPGLLANFTLLR**

Found in **P02750** in **con\_Xuniprot\_HUMAN3**, A2GL\_HUMAN Leucine-rich alpha-2-glycoprotein OS=Homo sapiens GN=LRG1 PE=1 SV=2

Match to Query 10899: 1822.126056 from(456.538790,4+) intensity(14124.9121) rtinseconds(2051) scans(5086) index(22319)

Title: 111019\_Est\_MI\_YS\_G\_02Spectrum4402\_scans\_5086

Data file C:\\mascot\\20140703\_Tmgf\_1D\\CSV\_UseAnalysis\\MasterCSV\\All\_Glyco\\mgf\\ptm\\UC18ERLIC\_PTM\_35D.mgf

Click mouse within plot area to zoom in by factor of two about that point

Or, to Da

Label all possible matches Label matches used for scoring

Show Y-axis

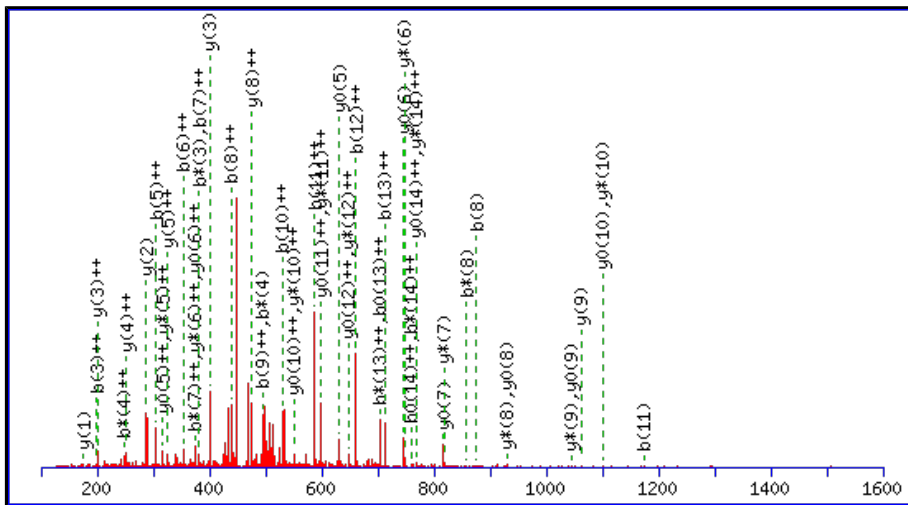

Monoisotopic mass of neutral peptide Mr(calc): 1822.1192

Fixed modifications: Carbamidomethyl (C) (apply to specified residues or termini only)

Variable modifications:

N11 : Deamidated (NQ)

Ions Score: 52 Expect: 3.1e-005

Matches : 53/148 fragment ions using 79 most intense peaks ([help](#))

| #  | b                | b <sup>++</sup> | b <sup>*</sup>  | b <sup>***</sup> | b <sup>0</sup> | b <sup>0++</sup> | Seq. | y                | y <sup>++</sup> | y <sup>*</sup>   | y <sup>***</sup> | y <sup>0</sup>   | y <sup>0++</sup> | #  |
|----|------------------|-----------------|-----------------|------------------|----------------|------------------|------|------------------|-----------------|------------------|------------------|------------------|------------------|----|
| 1  | 114.0913         | 57.5493         |                 |                  |                |                  | L    |                  |                 |                  |                  |                  |                  | 16 |
| 2  | 270.1925         | 135.5999        | 253.1659        | 127.0866         |                |                  | R    | 1710.0425        | 855.5249        | 1693.0159        | 847.0116         | 1692.0319        | 846.5196         | 15 |
| 3  | 398.2874         | <b>199.6473</b> | <b>381.2609</b> | 191.1341         |                |                  | K    | 1553.9414        | 777.4743        | 1536.9148        | <b>768.9611</b>  | 1535.9308        | <b>768.4690</b>  | 14 |
| 4  | 511.3715         | 256.1894        | <b>494.3449</b> | <b>247.6761</b>  |                |                  | L    | 1425.8464        | 713.4268        | 1408.8199        | 704.9136         | 1407.8358        | 704.4216         | 13 |
| 5  | 608.4242         | <b>304.7158</b> | 591.3977        | 296.2025         |                |                  | P    | 1312.7624        | 656.8848        | 1295.7358        | <b>648.3715</b>  | 1294.7518        | <b>647.8795</b>  | 12 |
| 6  | 705.4770         | <b>353.2421</b> | 688.4505        | 344.7289         |                |                  | P    | 1215.7096        | 608.3584        | 1198.6830        | <b>599.8452</b>  | 1197.6990        | <b>599.3531</b>  | 11 |
| 7  | 762.4985         | <b>381.7529</b> | 745.4719        | <b>373.2396</b>  |                |                  | G    | 1118.6568        | 559.8320        | <b>1101.6303</b> | <b>551.3188</b>  | <b>1100.6463</b> | <b>550.8268</b>  | 10 |
| 8  | <b>875.5825</b>  | <b>438.2949</b> | <b>858.5560</b> | 429.7816         |                |                  | L    | <b>1061.6354</b> | 531.3213        | <b>1044.6088</b> | 522.8080         | <b>1043.6248</b> | 522.3160         | 9  |
| 9  | 988.6666         | <b>494.8369</b> | 971.6400        | 486.3237         |                |                  | L    | 948.5513         | <b>474.7793</b> | <b>931.5247</b>  | 466.2660         | <b>930.5407</b>  | 465.7740         | 8  |
| 10 | 1059.7037        | <b>530.3555</b> | 1042.6772       | 521.8422         |                |                  | A    | 835.4672         | 418.2373        | <b>818.4407</b>  | 409.7240         | <b>817.4567</b>  | 409.2320         | 7  |
| 11 | <b>1174.7307</b> | <b>587.8690</b> | 1157.7041       | 579.3557         |                |                  | N    | 764.4301         | 382.7187        | <b>747.4036</b>  | <b>374.2054</b>  | <b>746.4196</b>  | <b>373.7134</b>  | 6  |
| 12 | 1321.7991        | <b>661.4032</b> | 1304.7725       | 652.8899         |                |                  | F    | 649.4032         | <b>325.2052</b> | 632.3766         | <b>316.6919</b>  | <b>631.3926</b>  | <b>316.1999</b>  | 5  |
| 13 | 1422.8467        | <b>711.9270</b> | 1405.8202       | <b>703.4137</b>  | 1404.8362      | <b>702.9217</b>  | T    | 502.3348         | <b>251.6710</b> | 485.3082         | 243.1577         | 484.3242         | 242.6657         | 4  |
| 14 | 1535.9308        | <b>768.4690</b> | 1518.9043       | <b>759.9558</b>  | 1517.9202      | <b>759.4638</b>  | L    | <b>401.2871</b>  | <b>201.1472</b> | 384.2605         | 192.6339         |                  |                  | 3  |
| 15 | 1649.0149        | 825.0111        | 1631.9883       | 816.4978         | 1631.0043      | 816.0058         | L    | <b>288.2030</b>  | 144.6051        | 271.1765         | 136.0919         |                  |                  | 2  |
| 16 |                  |                 |                 |                  |                |                  | R    | <b>175.1190</b>  | 88.0631         | 158.0924         | 79.5498          |                  |                  | 1  |

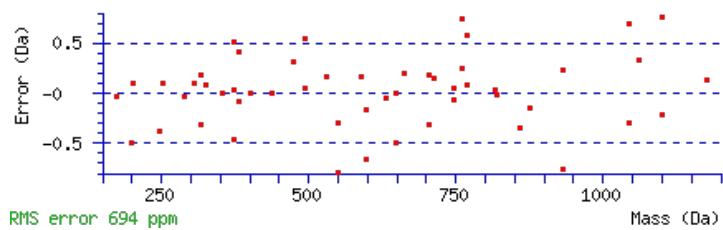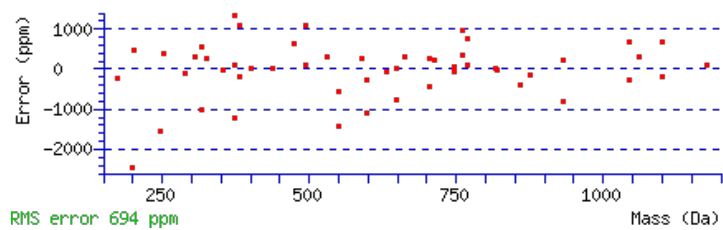

NCBI **BLAST** search of [LRKLPGLLANFTLLR](#)

(Parameters: blastp, nr protein database, expect=20000, no filter, PAM30)

Other BLAST [web gateways](#)

**All matches to this query**

| Score | Mr(calc)  | Delta  | Sequence                        |
|-------|-----------|--------|---------------------------------|
| 52.0  | 1822.1192 | 0.0068 | <a href="#">LRKLPGLLANFTLLR</a> |

Mascot: <http://www.matrixscience.com/>



# MATRIX SCIENCE Mascot Search Results

## Peptide View

MS/MS Fragmentation of **YFYNGTSMACETFQYGGCMGNGNNFVTEK**

Found in **P02760** in **con\_Xuniprot\_HUMAN3**, AMBP\_HUMAN Protein AMBP OS=Homo sapiens GN=AMBP PE=1 SV=1

Match to Query 27609: 3379.331112 from(1127.450980,3+) intensity(9821.7988) rtinseconds(2377) scans(6310) index(4625)

Title: 111019\_Est\_ISCardio\_NMI\_YP\_G\_7Spectrum5377\_scans\_\_6310

Data file C:\mascot\20140703\_Tmgf\_1D\CSV\_UseAnalysis\MasterCSV\All\_Glyco\mgf\ptm\UC18ERLIC\_PTM\_35D.mgf

Click mouse within plot area to zoom in by factor of two about that point

Or, to Da

Label all possible matches Label matches used for scoring

Show Y-axis

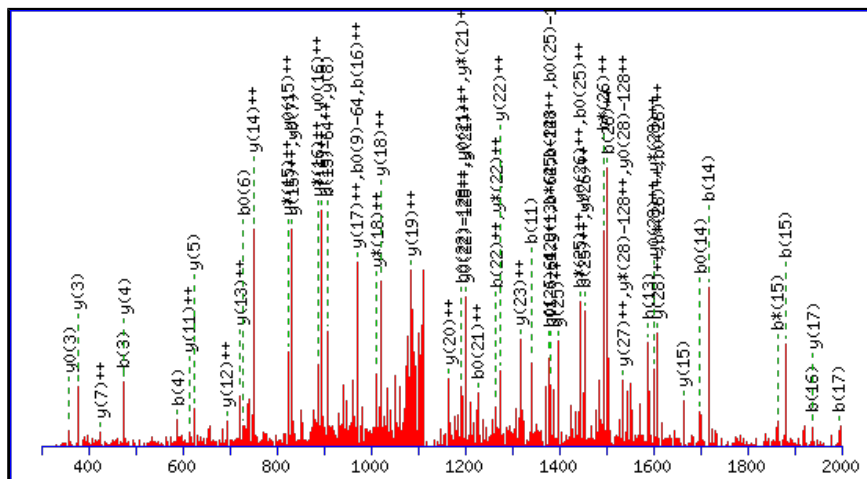

Monoisotopic mass of neutral peptide Mr(calc): 3379.3203

Fixed modifications: Carbamidomethyl (C) (apply to specified residues or termini only)

Variable modifications:

N4 : Deamidated (NQ)

M8 : Oxidation (M), with neutral losses 0.0000(shown in table), 63.9983

M19 : Oxidation (M), with neutral losses 0.0000(shown in table), 63.9983

Ions Score: 133 Expect: 5.4e-013

Matches : 70/552 fragment ions using 68 most intense peaks ([help](#))

| #  | b         | b <sup>++</sup> | b <sup>*</sup> | b <sup>*++</sup> | b <sup>0</sup> | b <sup>0++</sup> | Seq. | y         | y <sup>++</sup> | y <sup>*</sup> | y <sup>*++</sup> | y <sup>0</sup> | y <sup>0++</sup> | #  |
|----|-----------|-----------------|----------------|------------------|----------------|------------------|------|-----------|-----------------|----------------|------------------|----------------|------------------|----|
| 1  | 164.0706  | 82.5389         |                |                  |                |                  | Y    |           |                 |                |                  |                |                  | 29 |
| 2  | 311.1390  | 156.0731        |                |                  |                |                  | F    | 3217.2642 | 1609.1357       | 3200.2377      | 1600.6225        | 3199.2536      | 1600.1305        | 28 |
| 3  | 474.2023  | 237.6048        |                |                  |                |                  | Y    | 3070.1958 | 1535.6015       | 3053.1692      | 1527.0883        | 3052.1852      | 1526.5962        | 27 |
| 4  | 589.2293  | 295.1183        | 572.2027       | 286.6050         |                |                  | N    | 2907.1325 | 1454.0699       | 2890.1059      | 1445.5566        | 2889.1219      | 1445.0646        | 26 |
| 5  | 646.2508  | 323.6290        | 629.2242       | 315.1157         |                |                  | G    | 2792.1055 | 1396.5564       | 2775.0790      | 1388.0431        | 2774.0950      | 1387.5511        | 25 |
| 6  | 747.2984  | 374.1529        | 730.2719       | 365.6396         | 729.2879       | 365.1476         | T    | 2735.0841 | 1368.0457       | 2718.0575      | 1359.5324        | 2717.0735      | 1359.0404        | 24 |
| 7  | 834.3305  | 417.6689        | 817.3039       | 409.1556         | 816.3199       | 408.6636         | S    | 2634.0364 | 1317.5218       | 2617.0098      | 1309.0086        | 2616.0258      | 1308.5165        | 23 |
| 8  | 981.3659  | 491.1866        | 964.3393       | 482.6733         | 963.3553       | 482.1813         | M    | 2547.0043 | 1274.0058       | 2529.9778      | 1265.4925        | 2528.9938      | 1265.0005        | 22 |
| 9  | 1052.4030 | 526.7051        | 1035.3764      | 518.1919         | 1034.3924      | 517.6998         | A    | 2399.9689 | 1200.4881       | 2382.9424      | 1191.9748        | 2381.9584      | 1191.4828        | 21 |
| 10 | 1212.4336 | 606.7205        | 1195.4071      | 598.2072         | 1194.4231      | 597.7152         | C    | 2328.9318 | 1164.9696       | 2311.9053      | 1156.4563        | 2310.9213      | 1155.9643        | 20 |
| 11 | 1341.4762 | 671.2417        | 1324.4497      | 662.7285         | 1323.4657      | 662.2365         | E    | 2168.9012 | 1084.9542       | 2151.8746      | 1076.4410        | 2150.8906      | 1075.9489        | 19 |
| 12 | 1442.5239 | 721.7656        | 1425.4973      | 713.2523         | 1424.5133      | 712.7603         | T    | 2039.8586 | 1020.4329       | 2022.8320      | 1011.9197        | 2021.8480      | 1011.4277        | 18 |
| 13 | 1589.5923 | 795.2998        | 1572.5658      | 786.7865         | 1571.5817      | 786.2945         | F    | 1938.8109 | 969.9091        | 1921.7844      | 961.3958         | 1920.8003      | 960.9038         | 17 |
| 14 | 1717.6509 | 859.3291        | 1700.6243      | 850.8158         | 1699.6403      | 850.3238         | Q    | 1791.7425 | 896.3749        | 1774.7159      | 887.8616         | 1773.7319      | 887.3696         | 16 |
| 15 | 1880.7142 | 940.8607        | 1863.6877      | 932.3475         | 1862.7037      | 931.8555         | Y    | 1663.6839 | 832.3456        | 1646.6574      | 823.8323         | 1645.6734      | 823.3403         | 15 |
| 16 | 1937.7357 | 969.3715        | 1920.7091      | 960.8582         | 1919.7251      | 960.3662         | G    | 1500.6206 | 750.8139        | 1483.5940      | 742.3007         | 1482.6100      | 741.8087         | 14 |
| 17 | 1994.7571 | 997.8822        | 1977.7306      | 989.3689         | 1976.7466      | 988.8769         | G    | 1443.5991 | 722.3032        | 1426.5726      | 713.7899         | 1425.5886      | 713.2979         | 13 |
| 18 | 2154.7878 | 1077.8975       | 2137.7612      | 1069.3843        | 2136.7772      | 1068.8923        | C    | 1386.5777 | 693.7925        | 1369.5511      | 685.2792         | 1368.5671      | 684.7872         | 12 |
| 19 | 2301.8232 | 1151.4152       | 2284.7966      | 1142.9020        | 2283.8126      | 1142.4100        | M    | 1226.5470 | 613.7771        | 1209.5205      | 605.2639         | 1208.5364      | 604.7719         | 11 |
| 20 | 2358.8447 | 1179.9260       | 2341.8181      | 1171.4127        | 2340.8341      | 1170.9207        | G    | 1079.5116 | 540.2594        | 1062.4851      | 531.7462         | 1061.5010      | 531.2542         | 10 |
| 21 | 2472.8876 | 1236.9474       | 2455.8610      | 1228.4342        | 2454.8770      | 1227.9421        | N    | 1022.4901 | 511.7487        | 1005.4636      | 503.2354         | 1004.4796      | 502.7434         | 9  |
| 22 | 2529.9090 | 1265.4582       | 2512.8825      | 1256.9449        | 2511.8985      | 1256.4529        | G    | 908.4472  | 454.7272        | 891.4207       | 446.2140         | 890.4367       | 445.7220         | 8  |



|    |           |           |           |           |           |           |   |          |          |          |          |          |          |   |
|----|-----------|-----------|-----------|-----------|-----------|-----------|---|----------|----------|----------|----------|----------|----------|---|
| 23 | 2643.9520 | 1322.4796 | 2626.9254 | 1313.9664 | 2625.9414 | 1313.4743 | N | 851.4258 | 426.2165 | 834.3992 | 417.7032 | 833.4152 | 417.2112 | 7 |
| 24 | 2757.9949 | 1379.5011 | 2740.9684 | 1370.9878 | 2739.9843 | 1370.4958 | N | 737.3828 | 369.1951 | 720.3563 | 360.6818 | 719.3723 | 360.1898 | 6 |
| 25 | 2905.0633 | 1453.0353 | 2888.0368 | 1444.5220 | 2887.0528 | 1444.0300 | F | 623.3399 | 312.1736 | 606.3134 | 303.6603 | 605.3293 | 303.1683 | 5 |
| 26 | 3004.1317 | 1502.5695 | 2987.1052 | 1494.0562 | 2986.1212 | 1493.5642 | V | 476.2715 | 238.6394 | 459.2449 | 230.1261 | 458.2609 | 229.6341 | 4 |
| 27 | 3105.1794 | 1553.0933 | 3088.1529 | 1544.5801 | 3087.1688 | 1544.0881 | T | 377.2031 | 189.1052 | 360.1765 | 180.5919 | 359.1925 | 180.0999 | 3 |
| 28 | 3234.2220 | 1617.6146 | 3217.1955 | 1609.1014 | 3216.2114 | 1608.6094 | E | 276.1554 | 138.5813 | 259.1288 | 130.0681 | 258.1448 | 129.5761 | 2 |
| 29 |           |           |           |           |           |           | K | 147.1128 | 74.0600  | 130.0863 | 65.5468  |          |          | 1 |

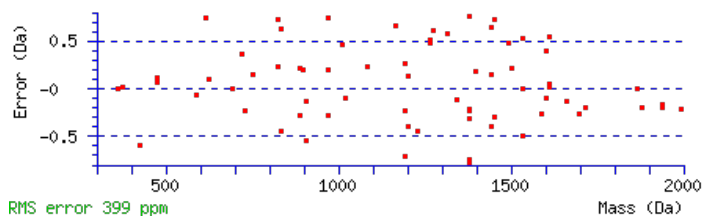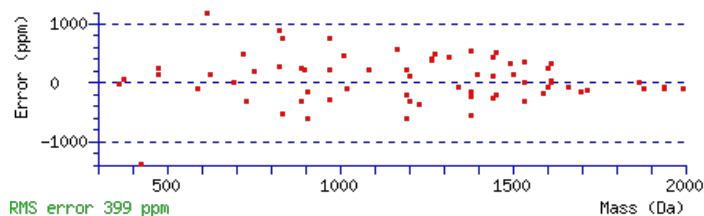

NCBI BLAST search of [YFYNGTSMACETFQYGGCMGNGNNEFVTEK](#)  
 (Parameters: blastp, nr protein database, expect=20000, no filter, PAM30)  
 Other BLAST [web gateways](#)

All matches to this query

| Score | Mr(calc)  | Delta  | Sequence                                       | Site Analysis         |
|-------|-----------|--------|------------------------------------------------|-----------------------|
| 133.5 | 3379.3203 | 0.0108 | <a href="#">YFYNGTSMACETFQYGGCMGNGNNEFVTEK</a> | Deamidated N4 70.29%  |
| 129.1 | 3379.3203 | 0.0108 | <a href="#">YFYNGTSMACETFQYGGCMGNGNNEFVTEK</a> | Deamidated Q14 25.58% |
| 127.0 | 3379.3203 | 0.0108 | <a href="#">YFYNGTSMACETFQYGGCMGNGNNEFVTVR</a> |                       |
| 120.9 | 3379.3203 | 0.0108 | <a href="#">YFYNGTSMACETFQYGGCMGNGNNEFVTEK</a> | Deamidated N21 3.84%  |
| 113.0 | 3379.3203 | 0.0108 | <a href="#">YFYNGTSMACETFQYGGCMGNGNNEFVTVR</a> |                       |
| 111.3 | 3379.3203 | 0.0108 | <a href="#">YFYNGTSMACETFQYGGCMGNGNNEFVTVR</a> |                       |
| 109.5 | 3379.3203 | 0.0108 | <a href="#">YFYNGTSMACETFQYGGCMGNGNNEFVTVR</a> |                       |
| 109.5 | 3379.3203 | 0.0108 | <a href="#">YFYNGTSMACETFQYGGCMGNGNNEFVTVR</a> |                       |
| 106.6 | 3379.3203 | 0.0108 | <a href="#">YFYNGTSMACETFQYGGCMGNGNNEFVTEK</a> | Deamidated N24 0.14%  |
| 106.6 | 3379.3203 | 0.0108 | <a href="#">YFYNGTSMACETFQYGGCMGNGNNEFVTEK</a> | Deamidated N23 0.14%  |

Mascot: <http://www.matrixscience.com/>

# MASCOT SCIENCE Mascot Search Results

## Peptide View

MS/MS Fragmentation of **YFYNGTSMACETFQYGGCMGNGNNFVTEK**

Found in **P02760** in **con\_Xuniprot\_HUMAN3**, AMBP\_HUMAN Protein AMBP OS=Homo sapiens GN=AMBP PE=1 SV=1

Match to Query 27497: 3347.338362 from(1116.786730,3+) intensity(25581.5449) rtinseconds(1973) scans(4930) index(12749)

Title: 111019\_Est\_ISCardio\_NMI\_YS\_G\_9Spectrum4312\_scans\_\_4930

Data file C:\mascot\20140703\_Tmgf\_1D\CSV\_UseAnalysis\MasterCSV\All\_Glyco\mgf\ptm\UC18ERLIC\_PTM\_35D.mgf

Click mouse within plot area to zoom in by factor of two about that point

Or, to Da

Label all possible matches Label matches used for scoring

Show Y-axis

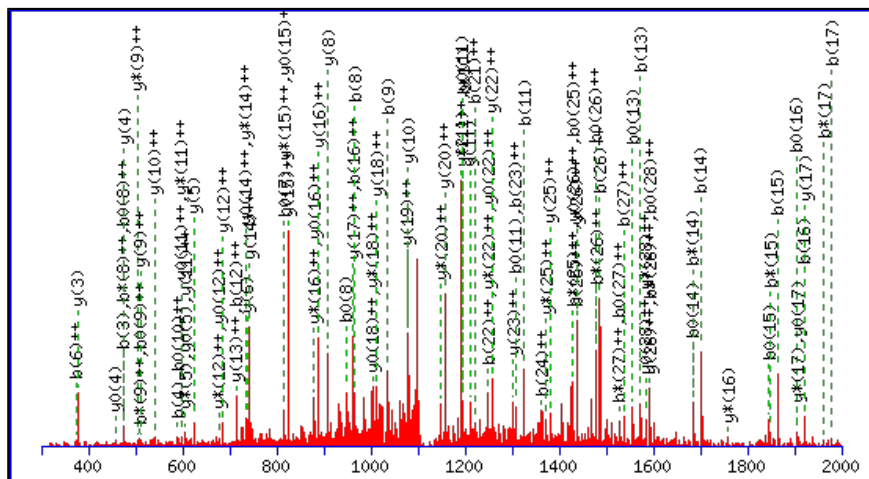

Monoisotopic mass of neutral peptide Mr(calc): 3347.3304

Fixed modifications: Carbamidomethyl (C) (apply to specified residues or termini only)

Variable modifications:

N4 : Deamidated (NQ)

Ions Score: 116 Expect: 3e-011

Matches : 98/318 fragment ions using 119 most intense peaks ([help](#))

| #  | b         | b <sup>++</sup> | b <sup>*</sup> | b <sup>*++</sup> | b <sup>0</sup> | b <sup>0++</sup> | Seq. | y         | y <sup>++</sup> | y <sup>*</sup> | y <sup>*++</sup> | y <sup>0</sup> | y <sup>0++</sup> | #  |
|----|-----------|-----------------|----------------|------------------|----------------|------------------|------|-----------|-----------------|----------------|------------------|----------------|------------------|----|
| 1  | 164.0706  | 82.5389         |                |                  |                |                  | Y    |           |                 |                |                  |                |                  | 29 |
| 2  | 311.1390  | 156.0731        |                |                  |                |                  | F    | 3185.2744 | 1593.1408       | 3168.2478      | 1584.6275        | 3167.2638      | 1584.1355        | 28 |
| 3  | 474.2023  | 237.6048        |                |                  |                |                  | Y    | 3038.2060 | 1519.6066       | 3021.1794      | 1511.0933        | 3020.1954      | 1510.6013        | 27 |
| 4  | 589.2293  | 295.1183        | 572.2027       | 286.6050         |                |                  | N    | 2875.1426 | 1438.0750       | 2858.1161      | 1429.5617        | 2857.1321      | 1429.0697        | 26 |
| 5  | 646.2508  | 323.6290        | 629.2242       | 315.1157         |                |                  | G    | 2760.1157 | 1380.5615       | 2743.0891      | 1372.0482        | 2742.1051      | 1371.5562        | 25 |
| 6  | 747.2984  | 374.1529        | 730.2719       | 365.6396         | 729.2879       | 365.1476         | T    | 2703.0942 | 1352.0507       | 2686.0677      | 1343.5375        | 2685.0837      | 1343.0455        | 24 |
| 7  | 834.3305  | 417.6689        | 817.3039       | 409.1556         | 816.3199       | 408.6636         | S    | 2602.0465 | 1301.5269       | 2585.0200      | 1293.0136        | 2584.0360      | 1292.5216        | 23 |
| 8  | 965.3709  | 483.1891        | 948.3444       | 474.6758         | 947.3604       | 474.1838         | M    | 2515.0145 | 1258.0109       | 2497.9880      | 1249.4976        | 2497.0040      | 1249.0056        | 22 |
| 9  | 1036.4081 | 518.7077        | 1019.3815      | 510.1944         | 1018.3975      | 509.7024         | A    | 2383.9740 | 1192.4907       | 2366.9475      | 1183.9774        | 2365.9635      | 1183.4854        | 21 |
| 10 | 1196.4387 | 598.7230        | 1179.4122      | 590.2097         | 1178.4281      | 589.7177         | C    | 2312.9369 | 1156.9721       | 2295.9104      | 1148.4588        | 2294.9264      | 1147.9668        | 20 |
| 11 | 1325.4813 | 663.2443        | 1308.4548      | 654.7310         | 1307.4707      | 654.2390         | E    | 2152.9063 | 1076.9568       | 2135.8797      | 1068.4435        | 2134.8957      | 1067.9515        | 19 |
| 12 | 1426.5290 | 713.7681        | 1409.5024      | 705.2549         | 1408.5184      | 704.7628         | T    | 2023.8637 | 1012.4355       | 2006.8371      | 1003.9222        | 2005.8531      | 1003.4302        | 18 |
| 13 | 1573.5974 | 787.3023        | 1556.5708      | 778.7891         | 1555.5868      | 778.2971         | F    | 1922.8160 | 961.9116        | 1905.7894      | 953.3984         | 1904.8054      | 952.9064         | 17 |
| 14 | 1701.6560 | 851.3316        | 1684.6294      | 842.8184         | 1683.6454      | 842.3263         | Q    | 1775.7476 | 888.3774        | 1758.7210      | 879.8642         | 1757.7370      | 879.3721         | 16 |
| 15 | 1864.7193 | 932.8633        | 1847.6928      | 924.3500         | 1846.7087      | 923.8580         | Y    | 1647.6890 | 824.3481        | 1630.6625      | 815.8349         | 1629.6784      | 815.3429         | 15 |
| 16 | 1921.7408 | 961.3740        | 1904.7142      | 952.8607         | 1903.7302      | 952.3687         | G    | 1484.6257 | 742.8165        | 1467.5991      | 734.3032         | 1466.6151      | 733.8112         | 14 |
| 17 | 1978.7622 | 989.8848        | 1961.7357      | 981.3715         | 1960.7517      | 980.8795         | G    | 1427.6042 | 714.3057        | 1410.5777      | 705.7925         | 1409.5936      | 705.3005         | 13 |
| 18 | 2138.7929 | 1069.9001       | 2121.7663      | 1061.3868        | 2120.7823      | 1060.8948        | C    | 1370.5827 | 685.7950        | 1353.5562      | 677.2817         | 1352.5722      | 676.7897         | 12 |
| 19 | 2269.8334 | 1135.4203       | 2252.8068      | 1126.9070        | 2251.8228      | 1126.4150        | M    | 1210.5521 | 605.7797        | 1193.5255      | 597.2664         | 1192.5415      | 596.7744         | 11 |
| 20 | 2326.8548 | 1163.9311       | 2309.8283      | 1155.4178        | 2308.8443      | 1154.9258        | G    | 1079.5116 | 540.2594        | 1062.4851      | 531.7462         | 1061.5010      | 531.2542         | 10 |
| 21 | 2440.8978 | 1220.9525       | 2423.8712      | 1212.4392        | 2422.8872      | 1211.9472        | N    | 1022.4901 | 511.7487        | 1005.4636      | 503.2354         | 1004.4796      | 502.7434         | 9  |
| 22 | 2497.9192 | 1249.4632       | 2480.8927      | 1240.9500        | 2479.9087      | 1240.4580        | G    | 908.4472  | 454.7272        | 891.4207       | 446.2140         | 890.4367       | 445.7220         | 8  |
| 23 | 2611.9621 | 1306.4847       | 2594.9356      | 1297.9714        | 2593.9516      | 1297.4794        | N    | 851.4258  | 426.2165        | 834.3992       | 417.7032         | 833.4152       | 417.2112         | 7  |

|    |           |                  |           |                  |           |                  |   |                 |          |                 |          |                 |          |   |
|----|-----------|------------------|-----------|------------------|-----------|------------------|---|-----------------|----------|-----------------|----------|-----------------|----------|---|
| 24 | 2726.0051 | <b>1363.5062</b> | 2708.9785 | 1354.9929        | 2707.9945 | 1354.5009        | N | <b>737.3828</b> | 369.1951 | 720.3563        | 360.6818 | 719.3723        | 360.1898 | 6 |
| 25 | 2873.0735 | <b>1437.0404</b> | 2856.0469 | <b>1428.5271</b> | 2855.0629 | <b>1428.0351</b> | F | <b>623.3399</b> | 312.1736 | <b>606.3134</b> | 303.6603 | <b>605.3293</b> | 303.1683 | 5 |
| 26 | 2972.1419 | <b>1486.5746</b> | 2955.1154 | <b>1478.0613</b> | 2954.1313 | <b>1477.5693</b> | V | <b>476.2715</b> | 238.6394 | 459.2449        | 230.1261 | <b>458.2609</b> | 229.6341 | 4 |
| 27 | 3073.1896 | <b>1537.0984</b> | 3056.1630 | <b>1528.5852</b> | 3055.1790 | <b>1528.0931</b> | T | <b>377.2031</b> | 189.1052 | 360.1765        | 180.5919 | 359.1925        | 180.0999 | 3 |
| 28 | 3202.2322 | 1601.6197        | 3185.2056 | <b>1593.1065</b> | 3184.2216 | <b>1592.6144</b> | E | 276.1554        | 138.5813 | 259.1288        | 130.0681 | 258.1448        | 129.5761 | 2 |
| 29 |           |                  |           |                  |           |                  | K | 147.1128        | 74.0600  | 130.0863        | 65.5468  |                 |          | 1 |

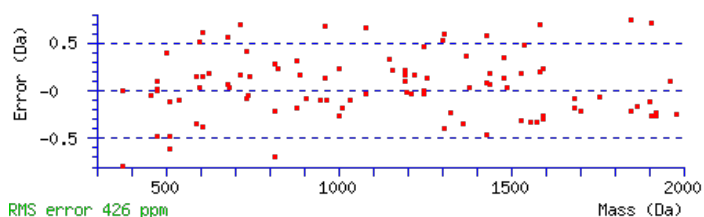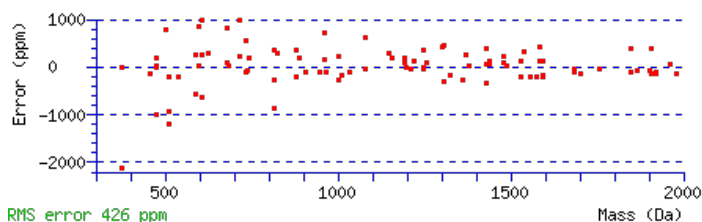

NCBI **BLAST** search of [YFYNGTSMACETFQYGGCMGNGNNEFVTEK](#)  
 (Parameters: blastp, nr protein database, expect=20000, no filter, PAM30)  
 Other BLAST [web gateways](#)

**All matches to this query**

| Score | Mr(calc)  | Delta  | Sequence                                       | Site Analysis         |
|-------|-----------|--------|------------------------------------------------|-----------------------|
| 116.5 | 3347.3304 | 0.0079 | <a href="#">YFYNGTSMACETFQYGGCMGNGNNEFVTEK</a> | Deamidated N4 73.94%  |
| 111.1 | 3347.3304 | 0.0079 | <a href="#">YFYNGTSMACETFQYGGCMGNGNNEFVTEK</a> | Deamidated Q14 21.52% |
| 103.4 | 3347.3304 | 0.0079 | <a href="#">YFYNGTSMACETFQYGGCMGNGNNEFVTVR</a> |                       |
| 103.2 | 3346.3464 | 0.9919 | <a href="#">YFYNGTSMACETFQYGGCMGNGNNEFVTEK</a> |                       |
| 101.4 | 3347.3304 | 0.0079 | <a href="#">YFYNGTSMACETFQYGGCMGNGNNEFVTVR</a> |                       |
| 101.4 | 3347.3304 | 0.0079 | <a href="#">YFYNGTSMACETFQYGGCMGNGNNEFVTVR</a> |                       |
| 101.3 | 3347.3304 | 0.0079 | <a href="#">YFYNGTSMACETFQYGGCMGNGNNEFVTEK</a> | Deamidated N21 2.25%  |
| 99.7  | 3347.3304 | 0.0079 | <a href="#">YFYNGTSMACETFQYGGCMGNGNNEFVTVR</a> |                       |
| 99.4  | 3347.3304 | 0.0079 | <a href="#">YFYNGTSMACETFQYGGCMGNGNNEFVTEK</a> | Deamidated N23 1.45%  |
| 98.0  | 3346.3464 | 0.9919 | <a href="#">YFYNGTSMACETFQYGGCMGNGNNEFVTVR</a> |                       |

Mascot: <http://www.matrixscience.com/>

# MATRIX SCIENCE Mascot Search Results

## Peptide View

MS/MS Fragmentation of **YFYNGTSMACETFQYGGCMGNGNNFVTEK**

Found in **P02760** in **con\_Xuniprot\_HUMAN3**, AMBP\_HUMAN Protein AMBP OS=Homo sapiens GN=AMBP PE=1 SV=1

Match to Query 27518: 3363.339252 from(1122.120360,3+) intensity(0.0000) rtinseconds(1779) scans(4665) index(4459)

Title: 111019\_Est\_ISCardio\_NMI\_YP\_G\_7Spectrum3954\_scans\_\_4665

Data file C:\mascot\20140703\_Tmgf\_1D\CSV\_UseAnalysis\MasterCSV\All\_Glyco\mgf\ptm\UC18ERLIC\_PTM\_35D.mgf

Click mouse within plot area to zoom in by factor of two about that point

Or, to Da

Label all possible matches Label matches used for scoring

Show Y-axis

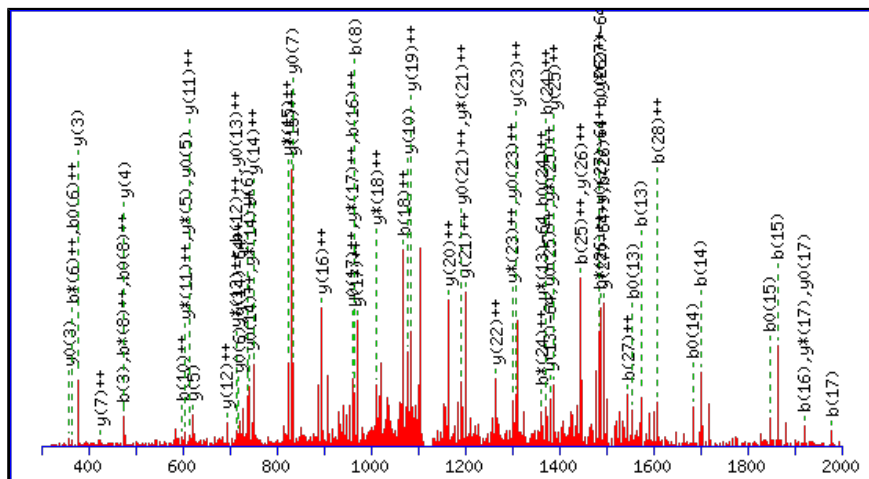

Monoisotopic mass of neutral peptide Mr(calc): 3363.3253

Fixed modifications: Carbamidomethyl (C) (apply to specified residues or termini only)

Variable modifications:

N4 : Deamidated (NQ)

M19 : Oxidation (M), with neutral losses 0.0000(shown in table), 63.9983

Ions Score: 100 Expect: 1.5e-009

Matches : 74/486 fragment ions using 68 most intense peaks ([help](#))

| #  | b                | b <sup>++</sup>  | b <sup>*</sup> | b <sup>*++</sup> | b <sup>0</sup>   | b <sup>0++</sup> | Seq. | y                | y <sup>++</sup>  | y <sup>*</sup>   | y <sup>*++</sup> | y <sup>0</sup>   | y <sup>0++</sup> | #  |
|----|------------------|------------------|----------------|------------------|------------------|------------------|------|------------------|------------------|------------------|------------------|------------------|------------------|----|
| 1  | 164.0706         | 82.5389          |                |                  |                  |                  | Y    |                  |                  |                  |                  |                  |                  | 29 |
| 2  | 311.1390         | 156.0731         |                |                  |                  |                  | F    | 3201.2693        | 1601.1383        | 3184.2427        | 1592.6250        | 3183.2587        | 1592.1330        | 28 |
| 3  | <b>474.2023</b>  | 237.6048         |                |                  |                  |                  | Y    | 3054.2009        | 1527.6041        | 3037.1743        | 1519.0908        | 3036.1903        | 1518.5988        | 27 |
| 4  | 589.2293         | 295.1183         | 572.2027       | 286.6050         |                  |                  | N    | 2891.1375        | <b>1446.0724</b> | 2874.1110        | 1437.5591        | 2873.1270        | 1437.0671        | 26 |
| 5  | 646.2508         | 323.6290         | 629.2242       | 315.1157         |                  |                  | G    | 2776.1106        | <b>1388.5589</b> | 2759.0841        | <b>1380.0457</b> | 2758.1000        | <b>1379.5537</b> | 25 |
| 6  | 747.2984         | 374.1529         | 730.2719       | <b>365.6396</b>  | 729.2879         | <b>365.1476</b>  | T    | 2719.0891        | 1360.0482        | 2702.0626        | 1351.5349        | 2701.0786        | 1351.0429        | 24 |
| 7  | 834.3305         | 417.6689         | 817.3039       | 409.1556         | 816.3199         | 408.6636         | S    | 2618.0415        | <b>1309.5244</b> | 2601.0149        | <b>1301.0111</b> | 2600.0309        | <b>1300.5191</b> | 23 |
| 8  | <b>965.3709</b>  | 483.1891         | 948.3444       | <b>474.6758</b>  | 947.3604         | <b>474.1838</b>  | M    | 2531.0094        | <b>1266.0084</b> | 2513.9829        | 1257.4951        | 2512.9989        | 1257.0031        | 22 |
| 9  | 1036.4081        | 518.7077         | 1019.3815      | 510.1944         | 1018.3975        | 509.7024         | A    | 2399.9689        | <b>1200.4881</b> | 2382.9424        | <b>1191.9748</b> | 2381.9584        | <b>1191.4828</b> | 21 |
| 10 | 1196.4387        | <b>598.7230</b>  | 1179.4122      | 590.2097         | 1178.4281        | 589.7177         | C    | 2328.9318        | <b>1164.9696</b> | 2311.9053        | 1156.4563        | 2310.9213        | 1155.9643        | 20 |
| 11 | 1325.4813        | 663.2443         | 1308.4548      | 654.7310         | 1307.4707        | 654.2390         | E    | 2168.9012        | <b>1084.9542</b> | 2151.8746        | 1076.4410        | 2150.8906        | 1075.9489        | 19 |
| 12 | 1426.5290        | <b>713.7681</b>  | 1409.5024      | 705.2549         | 1408.5184        | 704.7628         | T    | 2039.8586        | 1020.4329        | 2022.8320        | <b>1011.9197</b> | 2021.8480        | 1011.4277        | 18 |
| 13 | <b>1573.5974</b> | 787.3023         | 1556.5708      | 778.7891         | <b>1555.5868</b> | 778.2971         | F    | 1938.8109        | <b>969.9091</b>  | <b>1921.7844</b> | <b>961.3958</b>  | <b>1920.8003</b> | <b>960.9038</b>  | 17 |
| 14 | <b>1701.6560</b> | 851.3316         | 1684.6294      | 842.8184         | <b>1683.6454</b> | 842.3263         | Q    | 1791.7425        | <b>896.3749</b>  | 1774.7159        | 887.8616         | 1773.7319        | 887.3696         | 16 |
| 15 | <b>1864.7193</b> | 932.8633         | 1847.6928      | 924.3500         | <b>1846.7087</b> | 923.8580         | Y    | 1663.6839        | <b>832.3456</b>  | 1646.6574        | <b>823.8323</b>  | 1645.6734        | 823.3403         | 15 |
| 16 | <b>1921.7408</b> | <b>961.3740</b>  | 1904.7142      | 952.8607         | 1903.7302        | 952.3687         | G    | 1500.6206        | <b>750.8139</b>  | 1483.5940        | <b>742.3007</b>  | 1482.6100        | <b>741.8087</b>  | 14 |
| 17 | <b>1978.7622</b> | 989.8848         | 1961.7357      | 981.3715         | 1960.7517        | 980.8795         | G    | 1443.5991        | 722.3032         | 1426.5726        | <b>713.7899</b>  | 1425.5886        | <b>713.2979</b>  | 13 |
| 18 | 2138.7929        | <b>1069.9001</b> | 2121.7663      | 1061.3868        | 2120.7823        | 1060.8948        | C    | 1386.5777        | <b>693.7925</b>  | 1369.5511        | 685.2792         | 1368.5671        | 684.7872         | 12 |
| 19 | 2285.8283        | 1143.4178        | 2268.8017      | 1134.9045        | 2267.8177        | 1134.4125        | M    | 1226.5470        | <b>613.7771</b>  | 1209.5205        | <b>605.2639</b>  | 1208.5364        | 604.7719         | 11 |
| 20 | 2342.8497        | 1171.9285        | 2325.8232      | 1163.4152        | 2324.8392        | 1162.9232        | G    | <b>1079.5116</b> | 540.2594         | 1062.4851        | 531.7462         | 1061.5010        | 531.2542         | 10 |
| 21 | 2456.8927        | 1228.9500        | 2439.8661      | 1220.4367        | 2438.8821        | 1219.9447        | N    | 1022.4901        | 511.7487         | 1005.4636        | 503.2354         | 1004.4796        | 502.7434         | 9  |
| 22 | 2513.9141        | 1257.4607        | 2496.8876      | 1248.9474        | 2495.9036        | 1248.4554        | G    | 908.4472         | 454.7272         | 891.4207         | 446.2140         | 890.4367         | 445.7220         | 8  |

|    |           |           |           |           |           |           |   |          |          |          |          |          |          |   |
|----|-----------|-----------|-----------|-----------|-----------|-----------|---|----------|----------|----------|----------|----------|----------|---|
| 23 | 2627.9571 | 1314.4822 | 2610.9305 | 1305.9689 | 2609.9465 | 1305.4769 | N | 851.4258 | 426.2165 | 834.3992 | 417.7032 | 833.4152 | 417.2112 | 7 |
| 24 | 2742.0000 | 1371.5036 | 2724.9734 | 1362.9904 | 2723.9894 | 1362.4983 | N | 737.3828 | 369.1951 | 720.3563 | 360.6818 | 719.3723 | 360.1898 | 6 |
| 25 | 2889.0684 | 1445.0378 | 2872.0419 | 1436.5246 | 2871.0578 | 1436.0326 | F | 623.3399 | 312.1736 | 606.3134 | 303.6603 | 605.3293 | 303.1683 | 5 |
| 26 | 2988.1368 | 1494.5720 | 2971.1103 | 1486.0588 | 2970.1263 | 1485.5668 | V | 476.2715 | 238.6394 | 459.2449 | 230.1261 | 458.2609 | 229.6341 | 4 |
| 27 | 3089.1845 | 1545.0959 | 3072.1579 | 1536.5826 | 3071.1739 | 1536.0906 | T | 377.2031 | 189.1052 | 360.1765 | 180.5919 | 359.1925 | 180.0999 | 3 |
| 28 | 3218.2271 | 1609.6172 | 3201.2005 | 1601.1039 | 3200.2165 | 1600.6119 | E | 276.1554 | 138.5813 | 259.1288 | 130.0681 | 258.1448 | 129.5761 | 2 |
| 29 |           |           |           |           |           |           | K | 147.1128 | 74.0600  | 130.0863 | 65.5468  |          |          | 1 |

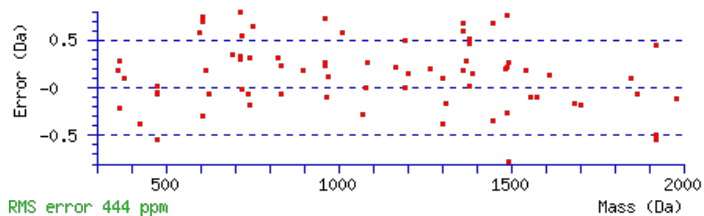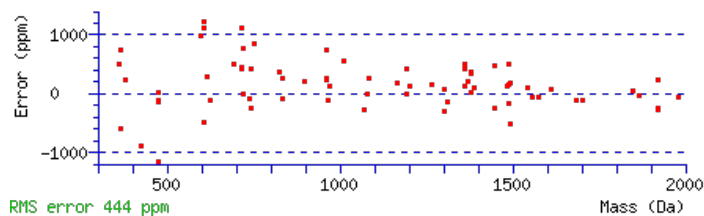

NCBI BLAST search of [YFYNGTSMACETFQYGGCMGNGNNEFVTEK](#)

(Parameters: blastp, nr protein database, expect=20000, no filter, PAM30)

Other BLAST [web gateways](#)

All matches to this query

| Score | Mr(calc)  | Delta  | Sequence                                       | Site Analysis                         |
|-------|-----------|--------|------------------------------------------------|---------------------------------------|
| 99.7  | 3363.3253 | 0.0139 | <a href="#">YFYNGTSMACETFQYGGCMGNGNNEFVTEK</a> | Deamidated N4, Oxidation M19; 49.30%  |
| 97.8  | 3363.3253 | 0.0139 | <a href="#">YFYNGTSMACETFQYGGCMGNGNNEFVTEK</a> | Deamidated Q14, Oxidation M19; 31.83% |
| 93.8  | 3363.3253 | 0.0139 | <a href="#">YFYNGTSMACETFQYGGCMGNGNNEFVTEK</a> | Deamidated N21, Oxidation M19; 12.70% |
| 87.8  | 3363.3253 | 0.0139 | <a href="#">YFYNGTSMACETFQYGGCMGNGNNEFVTVR</a> |                                       |
| 87.2  | 3363.3253 | 0.0139 | <a href="#">YFYNGTSMACETFQYGGCMGNGNNEFVTEK</a> | Deamidated N24, Oxidation M19; 2.77%  |
| 87.2  | 3363.3253 | 0.0139 | <a href="#">YFYNGTSMACETFQYGGCMGNGNNEFVTEK</a> | Deamidated N23, Oxidation M19; 2.77%  |
| 82.3  | 3362.3413 | 0.9979 | <a href="#">YFYNGTSMACETFQYGGCMGNGNNEFVTEK</a> |                                       |
| 78.8  | 3363.3253 | 0.0139 | <a href="#">YFYNGTSMACETFQYGGCMGNGNNEFVTEK</a> | Deamidated N4, Oxidation M8; 0.40%    |
| 75.2  | 3362.3413 | 0.9979 | <a href="#">YFYNGTSMACETFQYGGCMGNGNNEFVTVR</a> |                                       |
| 71.6  | 3363.3253 | 0.0139 | <a href="#">YFYNGTSMACETFQYGGCMGNGNNEFVTVR</a> |                                       |

Mascot: <http://www.matrixscience.com/>

# MATRIX SCIENCE Mascot Search Results

## Peptide View

MS/MS Fragmentation of **YFYNGTSMACETFQYGGCMGNGNNFVTEK**

Found in **P02760** in **con\_Xuniprot\_HUMAN3**, AMBP\_HUMAN Protein AMBP OS=Homo sapiens GN=AMBP PE=1 SV=1

Match to Query 27530: 3364.327122 from(1122.449650,3+) intensity(9716.8701) rtinseconds(2989) scans(7919) index(4813)

Title: 111019\_Est\_ISCardio\_NMI\_YP\_G\_7Spectrum6799\_scans\_\_7919

Data file C:\mascot\20140703\_Tmgf\_1D\CSV\_UseAnalysis\MasterCSV\All\_Glyco\mgf\ptm\UC18ERLIC\_PTM\_35D.mgf

Click mouse within plot area to zoom in by factor of two about that point

Or, to Da

Label all possible matches Label matches used for scoring

Show Y-axis

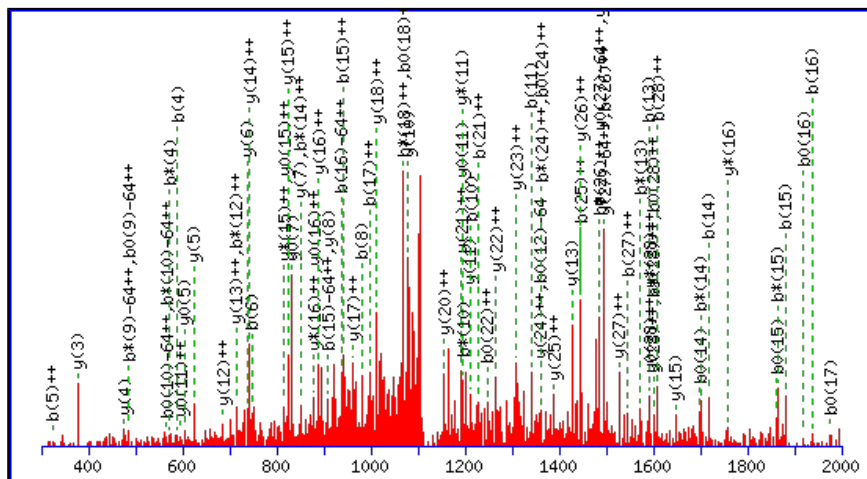

Monoisotopic mass of neutral peptide Mr(calc): 3363.3253

Fixed modifications: Carbamidomethyl (C) (apply to specified residues or termini only)

Variable modifications:

N4 : Deamidated (NQ)

M8 : Oxidation (M), with neutral losses 0.0000(shown in table), 63.9983

Ions Score: 77 Expect: 1.9e-007

Matches : 85/486 fragment ions using 153 most intense peaks ([help](#))

| #  | b         | b <sup>++</sup> | b <sup>*</sup> | b <sup>*++</sup> | b <sup>0</sup> | b <sup>0++</sup> | Seq. | y         | y <sup>++</sup> | y <sup>*</sup> | y <sup>*++</sup> | y <sup>0</sup> | y <sup>0++</sup> | #  |
|----|-----------|-----------------|----------------|------------------|----------------|------------------|------|-----------|-----------------|----------------|------------------|----------------|------------------|----|
| 1  | 164.0706  | 82.5389         |                |                  |                |                  | Y    |           |                 |                |                  |                |                  | 29 |
| 2  | 311.1390  | 156.0731        |                |                  |                |                  | F    | 3201.2693 | 1601.1383       | 3184.2427      | 1592.6250        | 3183.2587      | 1592.1330        | 28 |
| 3  | 474.2023  | 237.6048        |                |                  |                |                  | Y    | 3054.2009 | 1527.6041       | 3037.1743      | 1519.0908        | 3036.1903      | 1518.5988        | 27 |
| 4  | 589.2293  | 295.1183        | 572.2027       | 286.6050         |                |                  | N    | 2891.1375 | 1446.0724       | 2874.1110      | 1437.5591        | 2873.1270      | 1437.0671        | 26 |
| 5  | 646.2508  | 323.6290        | 629.2242       | 315.1157         |                |                  | G    | 2776.1106 | 1388.5589       | 2759.0841      | 1380.0457        | 2758.1000      | 1379.5537        | 25 |
| 6  | 747.2984  | 374.1529        | 730.2719       | 365.6396         | 729.2879       | 365.1476         | T    | 2719.0891 | 1360.0482       | 2702.0626      | 1351.5349        | 2701.0786      | 1351.0429        | 24 |
| 7  | 834.3305  | 417.6689        | 817.3039       | 409.1556         | 816.3199       | 408.6636         | S    | 2618.0415 | 1309.5244       | 2601.0149      | 1301.0111        | 2600.0309      | 1300.5191        | 23 |
| 8  | 981.3659  | 491.1866        | 964.3393       | 482.6733         | 963.3553       | 482.1813         | M    | 2531.0094 | 1266.0084       | 2513.9829      | 1257.4951        | 2512.9989      | 1257.0031        | 22 |
| 9  | 1052.4030 | 526.7051        | 1035.3764      | 518.1919         | 1034.3924      | 517.6998         | A    | 2383.9740 | 1192.4907       | 2366.9475      | 1183.9774        | 2365.9635      | 1183.4854        | 21 |
| 10 | 1212.4336 | 606.7205        | 1195.4071      | 598.2072         | 1194.4231      | 597.7152         | C    | 2312.9369 | 1156.9721       | 2295.9104      | 1148.4588        | 2294.9264      | 1147.9668        | 20 |
| 11 | 1341.4762 | 671.2417        | 1324.4497      | 662.7285         | 1323.4657      | 662.2365         | E    | 2152.9063 | 1076.9568       | 2135.8797      | 1068.4435        | 2134.8957      | 1067.9515        | 19 |
| 12 | 1442.5239 | 721.7656        | 1425.4973      | 713.2523         | 1424.5133      | 712.7603         | T    | 2023.8637 | 1012.4355       | 2006.8371      | 1003.9222        | 2005.8531      | 1003.4302        | 18 |
| 13 | 1589.5923 | 795.2998        | 1572.5658      | 786.7865         | 1571.5817      | 786.2945         | F    | 1922.8160 | 961.9116        | 1905.7894      | 953.3984         | 1904.8054      | 952.9064         | 17 |
| 14 | 1717.6509 | 859.3291        | 1700.6243      | 850.8158         | 1699.6403      | 850.3238         | Q    | 1775.7476 | 888.3774        | 1758.7210      | 879.8642         | 1757.7370      | 879.3721         | 16 |
| 15 | 1880.7142 | 940.8607        | 1863.6877      | 932.3475         | 1862.7037      | 931.8555         | Y    | 1647.6890 | 824.3481        | 1630.6625      | 815.8349         | 1629.6784      | 815.3429         | 15 |
| 16 | 1937.7357 | 969.3715        | 1920.7091      | 960.8582         | 1919.7251      | 960.3662         | G    | 1484.6257 | 742.8165        | 1467.5991      | 734.3032         | 1466.6151      | 733.8112         | 14 |
| 17 | 1994.7571 | 997.8822        | 1977.7306      | 989.3689         | 1976.7466      | 988.8769         | G    | 1427.6042 | 714.3057        | 1410.5777      | 705.7925         | 1409.5936      | 705.3005         | 13 |
| 18 | 2154.7878 | 1077.8975       | 2137.7612      | 1069.3843        | 2136.7772      | 1068.8923        | C    | 1370.5827 | 685.7950        | 1353.5562      | 677.2817         | 1352.5722      | 676.7897         | 12 |
| 19 | 2285.8283 | 1143.4178       | 2268.8017      | 1134.9045        | 2267.8177      | 1134.4125        | M    | 1210.5521 | 605.7797        | 1193.5255      | 597.2664         | 1192.5415      | 596.7744         | 11 |
| 20 | 2342.8497 | 1171.9285       | 2325.8232      | 1163.4152        | 2324.8392      | 1162.9232        | G    | 1079.5116 | 540.2594        | 1062.4851      | 531.7462         | 1061.5010      | 531.2542         | 10 |
| 21 | 2456.8927 | 1228.9500       | 2439.8661      | 1220.4367        | 2438.8821      | 1219.9447        | N    | 1022.4901 | 511.7487        | 1005.4636      | 503.2354         | 1004.4796      | 502.7434         | 9  |
| 22 | 2513.9141 | 1257.4607       | 2496.8876      | 1248.9474        | 2495.9036      | 1248.4554        | G    | 908.4472  | 454.7272        | 891.4207       | 446.2140         | 890.4367       | 445.7220         | 8  |



|    |           |           |           |           |           |           |   |          |          |          |          |          |          |   |
|----|-----------|-----------|-----------|-----------|-----------|-----------|---|----------|----------|----------|----------|----------|----------|---|
| 23 | 2627.9571 | 1314.4822 | 2610.9305 | 1305.9689 | 2609.9465 | 1305.4769 | N | 851.4258 | 426.2165 | 834.3992 | 417.7032 | 833.4152 | 417.2112 | 7 |
| 24 | 2742.0000 | 1371.5036 | 2724.9734 | 1362.9904 | 2723.9894 | 1362.4983 | N | 737.3828 | 369.1951 | 720.3563 | 360.6818 | 719.3723 | 360.1898 | 6 |
| 25 | 2889.0684 | 1445.0378 | 2872.0419 | 1436.5246 | 2871.0578 | 1436.0326 | F | 623.3399 | 312.1736 | 606.3134 | 303.6603 | 605.3293 | 303.1683 | 5 |
| 26 | 2988.1368 | 1494.5720 | 2971.1103 | 1486.0588 | 2970.1263 | 1485.5668 | V | 476.2715 | 238.6394 | 459.2449 | 230.1261 | 458.2609 | 229.6341 | 4 |
| 27 | 3089.1845 | 1545.0959 | 3072.1579 | 1536.5826 | 3071.1739 | 1536.0906 | T | 377.2031 | 189.1052 | 360.1765 | 180.5919 | 359.1925 | 180.0999 | 3 |
| 28 | 3218.2271 | 1609.6172 | 3201.2005 | 1601.1039 | 3200.2165 | 1600.6119 | E | 276.1554 | 138.5813 | 259.1288 | 130.0681 | 258.1448 | 129.5761 | 2 |
| 29 |           |           |           |           |           |           | K | 147.1128 | 74.0600  | 130.0863 | 65.5468  |          |          | 1 |

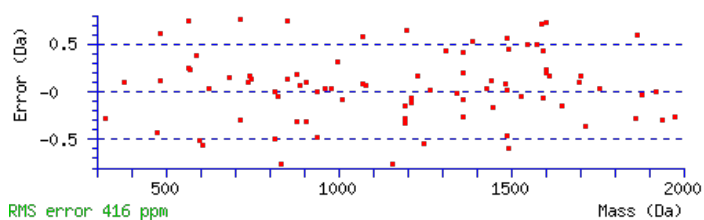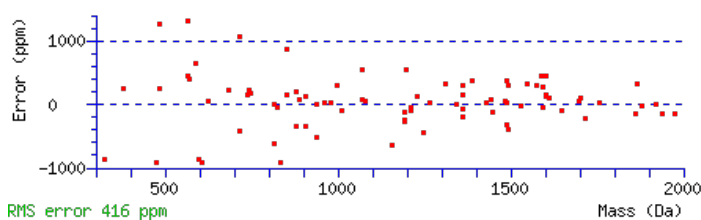

NCBI BLAST search of [YFYNGTSMACETFQYGGCMGNGNNEFVTEK](#)

(Parameters: blastp, nr protein database, expect=20000, no filter, PAM30)

Other BLAST [web gateways](#)

All matches to this query

| Score | Mr(calc)  | Delta  | Sequence                                       | Site Analysis                        |
|-------|-----------|--------|------------------------------------------------|--------------------------------------|
| 76.6  | 3363.3253 | 1.0018 | <a href="#">YFYNGTSMACETFQYGGCMGNGNNEFVTEK</a> | Deamidated N4, Oxidation M8; 91.54%  |
| 66.2  | 3363.3253 | 1.0018 | <a href="#">YFYNGTSMACETFQYGGCMGNGNNEFVTVR</a> |                                      |
| 63.4  | 3363.3253 | 1.0018 | <a href="#">YFYNGTSMACETFQYGGCMGNGNNEFVTEK</a> | Deamidated Q14, Oxidation M8; 4.36%  |
| 59.6  | 3363.3253 | 1.0018 | <a href="#">YFYNGTSMACETFQYGGCMGNGNNEFVTVR</a> |                                      |
| 59.6  | 3363.3253 | 1.0018 | <a href="#">YFYNGTSMACETFQYGGCMGNGNNEFVTVR</a> |                                      |
| 56.1  | 3363.3253 | 1.0018 | <a href="#">YFYNGTSMACETFQYGGCMGNGNNEFVTEK</a> | Deamidated N24, Oxidation M8; 0.82%  |
| 56.1  | 3363.3253 | 1.0018 | <a href="#">YFYNGTSMACETFQYGGCMGNGNNEFVTEK</a> | Deamidated N23, Oxidation M8; 0.82%  |
| 56.1  | 3363.3253 | 1.0018 | <a href="#">YFYNGTSMACETFQYGGCMGNGNNEFVTEK</a> | Deamidated N21, Oxidation M8; 0.82%  |
| 53.5  | 3363.3253 | 1.0018 | <a href="#">YFYNGTSMACETFQYGGCMGNGNNEFVTEK</a> | Deamidated N21, Oxidation M19; 0.45% |
| 52.8  | 3363.3253 | 1.0018 | <a href="#">YFYNGTSMACETFQYGGCMGNGNNEFVTVR</a> |                                      |

Mascot: <http://www.matrixscience.com/>



# MASCOT SCIENCE Mascot Search Results

## Peptide View

MS/MS Fragmentation of **YFYNGTSMACETFQYGGCMGNGNNFVTEK**

Found in **P02760** in **con\_Xuniprot\_HUMAN3**, AMBP\_HUMAN Protein AMBP OS=Homo sapiens GN=AMBP PE=1 SV=1

Match to Query 27501: 3348.298962 from(1117.106930,3+) intensity(0.0000) rtinseconds(2002) scans(5008) index(12763)

Title: 111019\_Est\_ISCardio\_NMI\_YS\_G\_9Spectrum4382\_scans\_\_5008

Data file C:\mascot\20140703\_Tmgf\_1D\CSV\_UseAnalysis\MasterCSV\All\_Glyco\mgf\ptm\UC18ERLIC\_PTM\_35D.mgf

Click mouse within plot area to zoom in by factor of two about that point

Or, to Da

Label all possible matches Label matches used for scoring

Show Y-axis

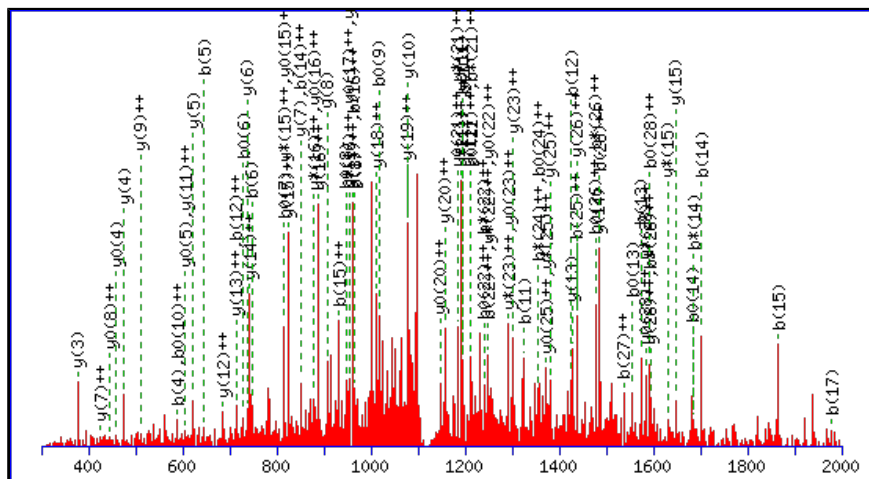

Monoisotopic mass of neutral peptide  $M_r(\text{calc})$ : 3348.3144

Fixed modifications: Carbamidomethyl (C) (apply to specified residues or termini only)

Variable modifications:

N4 : Deamidated (NQ)

Q14 : Deamidated (NQ)

Ions Score: 73 Expect: 2e-007

Matches : 89/318 fragment ions using 153 most intense peaks ([help](#))

| #  | b         | b <sup>++</sup> | b*        | b <sup>*++</sup> | b <sup>0</sup> | b <sup>0++</sup> | Seq. | y         | y <sup>++</sup> | y*        | y <sup>*++</sup> | y <sup>0</sup> | y <sup>0++</sup> | #  |
|----|-----------|-----------------|-----------|------------------|----------------|------------------|------|-----------|-----------------|-----------|------------------|----------------|------------------|----|
| 1  | 164.0706  | 82.5389         |           |                  |                |                  | Y    |           |                 |           |                  |                |                  | 29 |
| 2  | 311.1390  | 156.0731        |           |                  |                |                  | F    | 3186.2584 | 1593.6328       | 3169.2318 | 1585.1196        | 3168.2478      | 1584.6275        | 28 |
| 3  | 474.2023  | 237.6048        |           |                  |                |                  | Y    | 3039.1900 | 1520.0986       | 3022.1634 | 1511.5854        | 3021.1794      | 1511.0933        | 27 |
| 4  | 589.2293  | 295.1183        | 572.2027  | 286.6050         |                |                  | N    | 2876.1266 | 1438.5670       | 2859.1001 | 1430.0537        | 2858.1161      | 1429.5617        | 26 |
| 5  | 646.2508  | 323.6290        | 629.2242  | 315.1157         |                |                  | G    | 2761.0997 | 1381.0535       | 2744.0732 | 1372.5402        | 2743.0891      | 1372.0482        | 25 |
| 6  | 747.2984  | 374.1529        | 730.2719  | 365.6396         | 729.2879       | 365.1476         | T    | 2704.0782 | 1352.5428       | 2687.0517 | 1344.0295        | 2686.0677      | 1343.5375        | 24 |
| 7  | 834.3305  | 417.6689        | 817.3039  | 409.1556         | 816.3199       | 408.6636         | S    | 2603.0306 | 1302.0189       | 2586.0040 | 1293.5056        | 2585.0200      | 1293.0136        | 23 |
| 8  | 965.3709  | 483.1891        | 948.3444  | 474.6758         | 947.3604       | 474.1838         | M    | 2515.9985 | 1258.5029       | 2498.9720 | 1249.9896        | 2497.9880      | 1249.4976        | 22 |
| 9  | 1036.4081 | 518.7077        | 1019.3815 | 510.1944         | 1018.3975      | 509.7024         | A    | 2384.9580 | 1192.9827       | 2367.9315 | 1184.4694        | 2366.9475      | 1183.9774        | 21 |
| 10 | 1196.4387 | 598.7230        | 1179.4122 | 590.2097         | 1178.4281      | 589.7177         | C    | 2313.9209 | 1157.4641       | 2296.8944 | 1148.9508        | 2295.9104      | 1148.4588        | 20 |
| 11 | 1325.4813 | 663.2443        | 1308.4548 | 654.7310         | 1307.4707      | 654.2390         | E    | 2153.8903 | 1077.4488       | 2136.8637 | 1068.9355        | 2135.8797      | 1068.4435        | 19 |
| 12 | 1426.5290 | 713.7681        | 1409.5024 | 705.2549         | 1408.5184      | 704.7628         | T    | 2024.8477 | 1012.9275       | 2007.8211 | 1004.4142        | 2006.8371      | 1003.9222        | 18 |
| 13 | 1573.5974 | 787.3023        | 1556.5708 | 778.7891         | 1555.5868      | 778.2971         | F    | 1923.8000 | 962.4036        | 1906.7735 | 953.8904         | 1905.7894      | 953.3984         | 17 |
| 14 | 1702.6400 | 851.8236        | 1685.6134 | 843.3104         | 1684.6294      | 842.8184         | Q    | 1776.7316 | 888.8694        | 1759.7050 | 880.3562         | 1758.7210      | 879.8642         | 16 |
| 15 | 1865.7033 | 933.3553        | 1848.6768 | 924.8420         | 1847.6928      | 924.3500         | Y    | 1647.6890 | 824.3481        | 1630.6625 | 815.8349         | 1629.6784      | 815.3429         | 15 |
| 16 | 1922.7248 | 961.8660        | 1905.6982 | 953.3528         | 1904.7142      | 952.8607         | G    | 1484.6257 | 742.8165        | 1467.5991 | 734.3032         | 1466.6151      | 733.8112         | 14 |
| 17 | 1979.7462 | 990.3768        | 1962.7197 | 981.8635         | 1961.7357      | 981.3715         | G    | 1427.6042 | 714.3057        | 1410.5777 | 705.7925         | 1409.5936      | 705.3005         | 13 |
| 18 | 2139.7769 | 1070.3921       | 2122.7503 | 1061.8788        | 2121.7663      | 1061.3868        | C    | 1370.5827 | 685.7950        | 1353.5562 | 677.2817         | 1352.5722      | 676.7897         | 12 |
| 19 | 2270.8174 | 1135.9123       | 2253.7908 | 1127.3991        | 2252.8068      | 1126.9070        | M    | 1210.5521 | 605.7797        | 1193.5255 | 597.2664         | 1192.5415      | 596.7744         | 11 |
| 20 | 2327.8388 | 1164.4231       | 2310.8123 | 1155.9098        | 2309.8283      | 1155.4178        | G    | 1079.5116 | 540.2594        | 1062.4851 | 531.7462         | 1061.5010      | 531.2542         | 10 |
| 21 | 2441.8818 | 1221.4445       | 2424.8552 | 1212.9312        | 2423.8712      | 1212.4392        | N    | 1022.4901 | 511.7487        | 1005.4636 | 503.2354         | 1004.4796      | 502.7434         | 9  |
| 22 | 2498.9032 | 1249.9553       | 2481.8767 | 1241.4420        | 2480.8927      | 1240.9500        | G    | 908.4472  | 454.7272        | 891.4207  | 446.2140         | 890.4367       | 445.7220         | 8  |

|    |           |           |           |           |           |           |   |          |          |          |          |          |          |   |
|----|-----------|-----------|-----------|-----------|-----------|-----------|---|----------|----------|----------|----------|----------|----------|---|
| 23 | 2612.9462 | 1306.9767 | 2595.9196 | 1298.4634 | 2594.9356 | 1297.9714 | N | 851.4258 | 426.2165 | 834.3992 | 417.7032 | 833.4152 | 417.2112 | 7 |
| 24 | 2726.9891 | 1363.9982 | 2709.9625 | 1355.4849 | 2708.9785 | 1354.9929 | N | 737.3828 | 369.1951 | 720.3563 | 360.6818 | 719.3723 | 360.1898 | 6 |
| 25 | 2874.0575 | 1437.5324 | 2857.0310 | 1429.0191 | 2856.0469 | 1428.5271 | F | 623.3399 | 312.1736 | 606.3134 | 303.6603 | 605.3293 | 303.1683 | 5 |
| 26 | 2973.1259 | 1487.0666 | 2956.0994 | 1478.5533 | 2955.1154 | 1478.0613 | V | 476.2715 | 238.6394 | 459.2449 | 230.1261 | 458.2609 | 229.6341 | 4 |
| 27 | 3074.1736 | 1537.5904 | 3057.1470 | 1529.0772 | 3056.1630 | 1528.5852 | T | 377.2031 | 189.1052 | 360.1765 | 180.5919 | 359.1925 | 180.0999 | 3 |
| 28 | 3203.2162 | 1602.1117 | 3186.1896 | 1593.5985 | 3185.2056 | 1593.1065 | E | 276.1554 | 138.5813 | 259.1288 | 130.0681 | 258.1448 | 129.5761 | 2 |
| 29 |           |           |           |           |           |           | K | 147.1128 | 74.0600  | 130.0863 | 65.5468  |          |          | 1 |

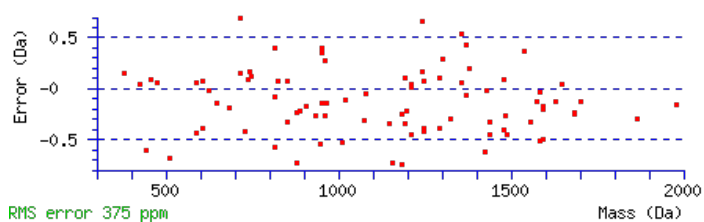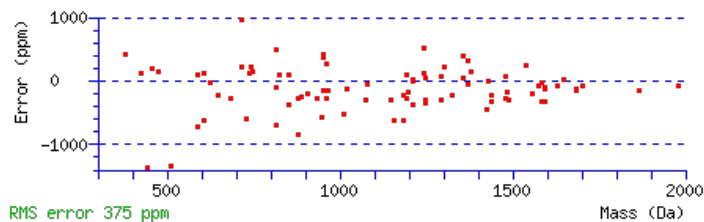

NCBI BLAST search of [YFYNGTSMACETFQYGGCMGNGNNEFVTEK](#)

(Parameters: blastp, nr protein database, expect=20000, no filter, PAM30)

Other BLAST [web gateways](#)

All matches to this query

| Score | Mr(calc)  | Delta   | Sequence                                       | Site Analysis             |
|-------|-----------|---------|------------------------------------------------|---------------------------|
| 73.2  | 3348.3144 | -0.0155 | <a href="#">YFYNGTSMACETFQYGGCMGNGNNEFVTEK</a> | Deamidated N4, Q14 95.68% |
| 61.4  | 3348.3144 | -0.0155 | <a href="#">YFYNGTSMACETFQYGGCMGNGNNEFVTVR</a> |                           |
| 60.6  | 3348.3144 | -0.0155 | <a href="#">YFYNGTSMACETFQYGGCMGNGNNEFVTVR</a> |                           |
| 60.6  | 3348.3144 | -0.0155 | <a href="#">YFYNGTSMACETFQYGGCMGNGNNEFVTVR</a> |                           |
| 56.5  | 3348.3144 | -0.0155 | <a href="#">YFYNGTSMACETFQYGGCMGNGNNEFVTEK</a> | Deamidated N4, N21 2.04%  |
| 53.8  | 3348.3144 | -0.0155 | <a href="#">YFYNGTSMACETFQYGGCMGNGNNEFVTEK</a> | Deamidated N4, N23 1.10%  |
| 53.8  | 3348.3144 | -0.0155 | <a href="#">YFYNGTSMACETFQYGGCMGNGNNEFVTEK</a> | Deamidated N4, N24 1.10%  |
| 39.7  | 3348.3144 | -0.0155 | <a href="#">YFYNGTSMACETFQYGGCMGNGNNEFVTVR</a> |                           |
| 38.1  | 3348.3144 | -0.0155 | <a href="#">YFYNGTSMACETFQYGGCMGNGNNEFVTEK</a> | Deamidated Q14, N21 0.03% |
| 34.7  | 3348.3144 | -0.0155 | <a href="#">YFYNGTSMACETFQYGGCMGNGNNEFVTEK</a> | Deamidated N21, N23 0.01% |

Mascot: <http://www.matrixscience.com/>

# MATRIX SCIENCE Mascot Search Results

## Peptide View

MS/MS Fragmentation of **YFYNGTSMACETFQYGGCMGNGNNFVTVR**

Found in **S4R471** in **con\_Xuniprot\_HUMAN3**, S4R471\_HUMAN Protein AMBP (Fragment) OS=Homo sapiens GN=AMBP PE=4 SV=1

Match to Query 27688: 3380.310462 from(1127.777430,3+) intensity(15255.6231) rtinseconds(1981) scans(5351) index(17729)

Title: 111019\_Est\_ML\_YP\_G\_07Spectrum4595\_scans\_5351

Data file C:\mascot\20140703\_Tmgf\_1D\CSV\_UseAnalysis\MasterCSV\All\_Glyco\mgf\ptm\UC18ERLIC\_PTM\_35D.mgf

Click mouse within plot area to zoom in by factor of two about that point

Or, to Da

Label all possible matches Label matches used for scoring

Show Y-axis

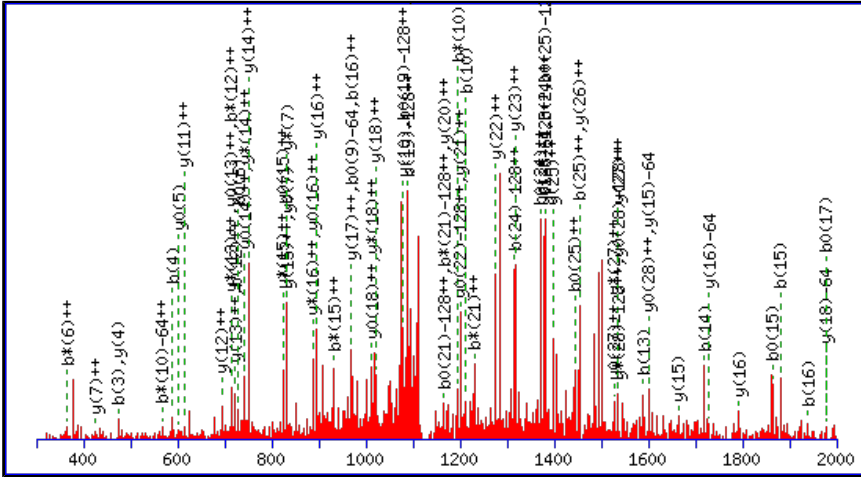

Monoisotopic mass of neutral peptide Mr(calc): 3380.3043

Fixed modifications: Carbamidomethyl (C) (apply to specified residues or termini only)

Variable modifications:

- N4 : Deamidated (NQ)
- M8 : Oxidation (M), with neutral losses 0.0000(shown in table), 63.9983
- Q14 : Deamidated (NQ)
- M19 : Oxidation (M), with neutral losses 0.0000(shown in table), 63.9983
- N21 : Deamidated (NQ)
- N24 : Deamidated (NQ)

Ions Score: 71 Expect: 4.6e-007

Matches : 76/550 fragment ions using 102 most intense peaks ([help](#))

| #  | b         | b <sup>++</sup> | b <sup>*</sup> | b <sup>*++</sup> | b <sup>0</sup> | b <sup>0++</sup> | Seq. | y         | y <sup>++</sup> | y <sup>*</sup> | y <sup>*++</sup> | y <sup>0</sup> | y <sup>0++</sup> | #  |
|----|-----------|-----------------|----------------|------------------|----------------|------------------|------|-----------|-----------------|----------------|------------------|----------------|------------------|----|
| 1  | 164.0706  | 82.5389         |                |                  |                |                  | Y    |           |                 |                |                  |                |                  | 29 |
| 2  | 311.1390  | 156.0731        |                |                  |                |                  | F    | 3218.2482 | 1609.6277       | 3201.2217      | 1601.1145        | 3200.2377      | 1600.6225        | 28 |
| 3  | 474.2023  | 237.6048        |                |                  |                |                  | Y    | 3071.1798 | 1536.0935       | 3054.1533      | 1527.5803        | 3053.1692      | 1527.0883        | 27 |
| 4  | 589.2293  | 295.1183        | 572.2027       | 286.6050         |                |                  | N    | 2908.1165 | 1454.5619       | 2891.0899      | 1446.0486        | 2890.1059      | 1445.5566        | 26 |
| 5  | 646.2508  | 323.6290        | 629.2242       | 315.1157         |                |                  | G    | 2793.0895 | 1397.0484       | 2776.0630      | 1388.5351        | 2775.0790      | 1388.0431        | 25 |
| 6  | 747.2984  | 374.1529        | 730.2719       | 365.6396         | 729.2879       | 365.1476         | T    | 2736.0681 | 1368.5377       | 2719.0415      | 1360.0244        | 2718.0575      | 1359.5324        | 24 |
| 7  | 834.3305  | 417.6689        | 817.3039       | 409.1556         | 816.3199       | 408.6636         | S    | 2635.0204 | 1318.0138       | 2617.9938      | 1309.5006        | 2617.0098      | 1309.0086        | 23 |
| 8  | 981.3659  | 491.1866        | 964.3393       | 482.6733         | 963.3553       | 482.1813         | M    | 2547.9884 | 1274.4978       | 2530.9618      | 1265.9845        | 2529.9778      | 1265.4925        | 22 |
| 9  | 1052.4030 | 526.7051        | 1035.3764      | 518.1919         | 1034.3924      | 517.6998         | A    | 2400.9530 | 1200.9801       | 2383.9264      | 1192.4668        | 2382.9424      | 1191.9748        | 21 |
| 10 | 1212.4336 | 606.7205        | 1195.4071      | 598.2072         | 1194.4231      | 597.7152         | C    | 2329.9158 | 1165.4616       | 2312.8893      | 1156.9483        | 2311.9053      | 1156.4563        | 20 |
| 11 | 1341.4762 | 671.2417        | 1324.4497      | 662.7285         | 1323.4657      | 662.2365         | E    | 2169.8852 | 1085.4462       | 2152.8587      | 1076.9330        | 2151.8746      | 1076.4410        | 19 |
| 12 | 1442.5239 | 721.7656        | 1425.4973      | 713.2523         | 1424.5133      | 712.7603         | T    | 2040.8426 | 1020.9249       | 2023.8161      | 1012.4117        | 2022.8320      | 1011.9197        | 18 |
| 13 | 1589.5923 | 795.2998        | 1572.5658      | 786.7865         | 1571.5817      | 786.2945         | F    | 1939.7949 | 970.4011        | 1922.7684      | 961.8878         | 1921.7844      | 961.3958         | 17 |
| 14 | 1718.6349 | 859.8211        | 1701.6084      | 851.3078         | 1700.6243      | 850.8158         | Q    | 1792.7265 | 896.8669        | 1775.7000      | 888.3536         | 1774.7159      | 887.8616         | 16 |
| 15 | 1881.6982 | 941.3528        | 1864.6717      | 932.8395         | 1863.6877      | 932.3475         | Y    | 1663.6839 | 832.3456        | 1646.6574      | 823.8323         | 1645.6734      | 823.3403         | 15 |
| 16 | 1938.7197 | 969.8635        | 1921.6931      | 961.3502         | 1920.7091      | 960.8582         | G    | 1500.6206 | 750.8139        | 1483.5940      | 742.3007         | 1482.6100      | 741.8087         | 14 |
| 17 | 1995.7412 | 998.3742        | 1978.7146      | 989.8609         | 1977.7306      | 989.3689         | G    | 1443.5991 | 722.3032        | 1426.5726      | 713.7899         | 1425.5886      | 713.2979         | 13 |
| 18 | 2155.7718 | 1078.3895       | 2138.7453      | 1069.8763        | 2137.7612      | 1069.3843        | C    | 1386.5777 | 693.7925        | 1369.5511      | 685.2792         | 1368.5671      | 684.7872         | 12 |
| 19 | 2302.8072 | 1151.9072       | 2285.7807      | 1143.3940        | 2284.7966      | 1142.9020        | M    | 1226.5470 | 613.7771        | 1209.5205      | 605.2639         | 1208.5364      | 604.7719         | 11 |
| 20 | 2359.8287 | 1180.4180       | 2342.8021      | 1171.9047        | 2341.8181      | 1171.4127        | G    | 1079.5116 | 540.2594        | 1062.4851      | 531.7462         | 1061.5010      | 531.2542         | 10 |

|    |           |           |           |           |           |           |   |           |          |           |          |           |          |   |
|----|-----------|-----------|-----------|-----------|-----------|-----------|---|-----------|----------|-----------|----------|-----------|----------|---|
| 21 | 2474.8556 | 1237.9314 | 2457.8291 | 1229.4182 | 2456.8451 | 1228.9262 | N | 1022.4901 | 511.7487 | 1005.4636 | 503.2354 | 1004.4796 | 502.7434 | 9 |
| 22 | 2531.8771 | 1266.4422 | 2514.8505 | 1257.9289 | 2513.8665 | 1257.4369 | G | 907.4632  | 454.2352 | 890.4367  | 445.7220 | 889.4526  | 445.2300 | 8 |
| 23 | 2645.9200 | 1323.4636 | 2628.8935 | 1314.9504 | 2627.9094 | 1314.4584 | N | 850.4417  | 425.7245 | 833.4152  | 417.2112 | 832.4312  | 416.7192 | 7 |
| 24 | 2760.9470 | 1380.9771 | 2743.9204 | 1372.4638 | 2742.9364 | 1371.9718 | N | 736.3988  | 368.7030 | 719.3723  | 360.1898 | 718.3883  | 359.6978 | 6 |
| 25 | 2908.0154 | 1454.5113 | 2890.9888 | 1445.9980 | 2890.0048 | 1445.5060 | F | 621.3719  | 311.1896 | 604.3453  | 302.6763 | 603.3613  | 302.1843 | 5 |
| 26 | 3007.0838 | 1504.0455 | 2990.0572 | 1495.5323 | 2989.0732 | 1495.0402 | V | 474.3035  | 237.6554 | 457.2769  | 229.1421 | 456.2929  | 228.6501 | 4 |
| 27 | 3108.1315 | 1554.5694 | 3091.1049 | 1546.0561 | 3090.1209 | 1545.5641 | T | 375.2350  | 188.1212 | 358.2085  | 179.6079 | 357.2245  | 179.1159 | 3 |
| 28 | 3207.1999 | 1604.1036 | 3190.1733 | 1595.5903 | 3189.1893 | 1595.0983 | V | 274.1874  | 137.5973 | 257.1608  | 129.0840 |           |          | 2 |
| 29 |           |           |           |           |           |           | R | 175.1190  | 88.0631  | 158.0924  | 79.5498  |           |          | 1 |

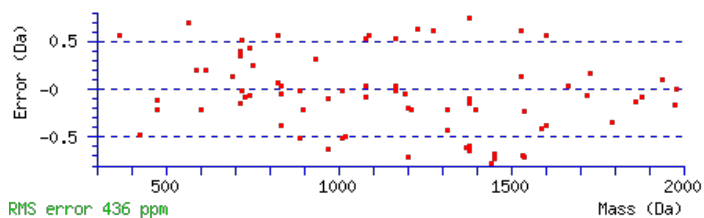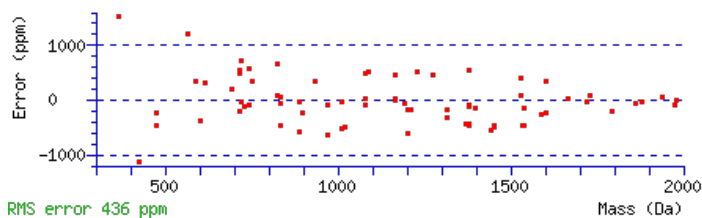

NCBI BLAST search of [YFYNGTSMACETFQYGGCMGNGNNEFVTVR](#)  
 (Parameters: blastp, nr protein database, expect=20000, no filter, PAM30)  
 Other BLAST [web gateways](#)

All matches to this query

| Score | Mr(calc)  | Delta  | Sequence                                       | Site Analysis                       |
|-------|-----------|--------|------------------------------------------------|-------------------------------------|
| 70.8  | 3380.3043 | 0.0062 | <a href="#">YFYNGTSMACETFQYGGCMGNGNNEFVTVR</a> | Deamidated N4, Q14, N21, N24 34.73% |
| 70.8  | 3380.3043 | 0.0062 | <a href="#">YFYNGTSMACETFQYGGCMGNGNNEFVTVR</a> | Deamidated N4, Q14, N21, N23 34.73% |
| 69.6  | 3379.3203 | 0.9902 | <a href="#">YFYNGTSMACETFQYGGCMGNGNNEFVTVR</a> |                                     |
| 69.6  | 3379.3203 | 0.9902 | <a href="#">YFYNGTSMACETFQYGGCMGNGNNEFVTVR</a> |                                     |
| 68.4  | 3380.3043 | 0.0062 | <a href="#">YFYNGTSMACETFQYGGCMGNGNNEFVTEK</a> |                                     |
| 68.3  | 3379.3203 | 0.9902 | <a href="#">YFYNGTSMACETFQYGGCMGNGNNEFVTEK</a> |                                     |
| 67.1  | 3380.3043 | 0.0062 | <a href="#">YFYNGTSMACETFQYGGCMGNGNNEFVTEK</a> |                                     |
| 67.1  | 3380.3043 | 0.0062 | <a href="#">YFYNGTSMACETFQYGGCMGNGNNEFVTEK</a> |                                     |
| 67.1  | 3380.3043 | 0.0062 | <a href="#">YFYNGTSMACETFQYGGCMGNGNNEFVTEK</a> |                                     |
| 66.5  | 3379.3203 | 0.9902 | <a href="#">YFYNGTSMACETFQYGGCMGNGNNEFVTEK</a> |                                     |

Mascot: <http://www.matrixscience.com/>

# MATRIX SCIENCE Mascot Search Results

## Peptide View

MS/MS Fragmentation of **QDQCIYNTTYLNVQR**

Found in **P02763** in **con\_Xuniprot\_HUMAN3**, A1AG1\_HUMAN Alpha-1-acid glycoprotein 1 OS=Homo sapiens GN=ORM1 PE=1 SV=1

Match to Query 11591: 1915.881788 from(958.948170,2+) intensity(53074.4570) rtinseconds(1364) scans(3214) index(27375)

Title: 111019\_Est\_MI\_YS\_G\_10Spectrum2759\_scans\_\_3214

Data file C:\\mascot\\20140703\_Tmgf\_1D\\CSV\_UseAnalysis\\MasterCSV\\All\_Glyco\\mgf\\ptm\\UC18ERLIC\_PTM\_35D.mgf

Click mouse within plot area to zoom in by factor of two about that point

Or, to Da

Label all possible matches Label matches used for scoring

Show Y-axis

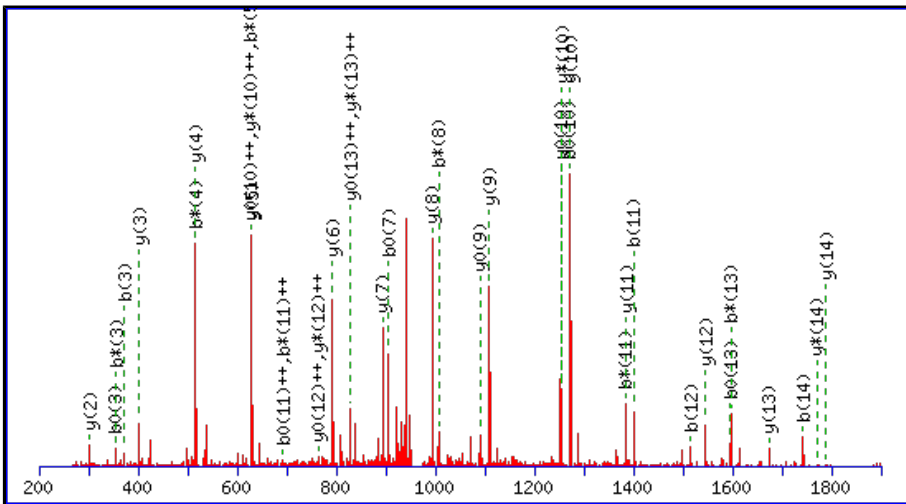

Monoisotopic mass of neutral peptide Mr(calc): 1915.8734

Fixed modifications: Carbamidomethyl (C) (apply to specified residues or termini only)

Variable modifications:

N7 : Deamidated (NQ)

Ions Score: 99 Expect: 2e-008

Matches : 39/154 fragment ions using 51 most intense peaks ([help](#))

| #  | b         | b <sup>++</sup> | b <sup>*</sup> | b <sup>*++</sup> | b <sup>0</sup> | b <sup>0++</sup> | Seq. | y         | y <sup>++</sup> | y <sup>*</sup> | y <sup>*++</sup> | y <sup>0</sup> | y <sup>0++</sup> | #  |
|----|-----------|-----------------|----------------|------------------|----------------|------------------|------|-----------|-----------------|----------------|------------------|----------------|------------------|----|
| 1  | 129.0659  | 65.0366         | 112.0393       | 56.5233          |                |                  | Q    |           |                 |                |                  |                |                  | 15 |
| 2  | 244.0928  | 122.5500        | 227.0662       | 114.0368         | 226.0822       | 113.5448         | D    | 1788.8221 | 894.9147        | 1771.7956      | 886.4014         | 1770.8116      | 885.9094         | 14 |
| 3  | 372.1514  | 186.5793        | 355.1248       | 178.0661         | 354.1408       | 177.5740         | Q    | 1673.7952 | 837.4012        | 1656.7686      | 828.8880         | 1655.7846      | 828.3959         | 13 |
| 4  | 532.1820  | 266.5947        | 515.1555       | 258.0814         | 514.1715       | 257.5894         | C    | 1545.7366 | 773.3719        | 1528.7101      | 764.8587         | 1527.7260      | 764.3667         | 12 |
| 5  | 645.2661  | 323.1367        | 628.2395       | 314.6234         | 627.2555       | 314.1314         | I    | 1385.7060 | 693.3566        | 1368.6794      | 684.8433         | 1367.6954      | 684.3513         | 11 |
| 6  | 808.3294  | 404.6683        | 791.3029       | 396.1551         | 790.3189       | 395.6631         | Y    | 1272.6219 | 636.8146        | 1255.5953      | 628.3013         | 1254.6113      | 627.8093         | 10 |
| 7  | 923.3564  | 462.1818        | 906.3298       | 453.6685         | 905.3458       | 453.1765         | N    | 1109.5586 | 555.2829        | 1092.5320      | 546.7696         | 1091.5480      | 546.2776         | 9  |
| 8  | 1024.4040 | 512.7057        | 1007.3775      | 504.1924         | 1006.3935      | 503.7004         | T    | 994.5316  | 497.7694        | 977.5051       | 489.2562         | 976.5211       | 488.7642         | 8  |
| 9  | 1125.4517 | 563.2295        | 1108.4252      | 554.7162         | 1107.4412      | 554.2242         | T    | 893.4839  | 447.2456        | 876.4574       | 438.7323         | 875.4734       | 438.2403         | 7  |
| 10 | 1288.5150 | 644.7612        | 1271.4885      | 636.2479         | 1270.5045      | 635.7559         | Y    | 792.4363  | 396.7218        | 775.4097       | 388.2085         |                |                  | 6  |
| 11 | 1401.5991 | 701.3032        | 1384.5726      | 692.7899         | 1383.5885      | 692.2979         | L    | 629.3729  | 315.1901        | 612.3464       | 306.6768         |                |                  | 5  |
| 12 | 1515.6420 | 758.3247        | 1498.6155      | 749.8114         | 1497.6315      | 749.3194         | N    | 516.2889  | 258.6481        | 499.2623       | 250.1348         |                |                  | 4  |
| 13 | 1614.7105 | 807.8589        | 1597.6839      | 799.3456         | 1596.6999      | 798.8536         | V    | 402.2459  | 201.6266        | 385.2194       | 193.1133         |                |                  | 3  |
| 14 | 1742.7690 | 871.8882        | 1725.7425      | 863.3749         | 1724.7585      | 862.8829         | Q    | 303.1775  | 152.0924        | 286.1510       | 143.5791         |                |                  | 2  |
| 15 |           |                 |                |                  |                |                  | R    | 175.1190  | 88.0631         | 158.0924       | 79.5498          |                |                  | 1  |

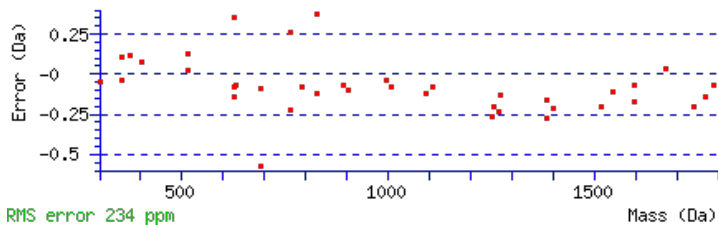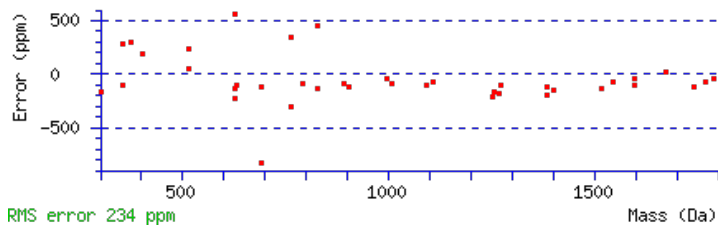

NCBI BLAST search of [QDQCIYNTTYLNVQR](#)

(Parameters: blastp, nr protein database, expect=20000, no filter, PAM30)

Other BLAST [web gateways](#)

**All matches to this query**

| Score | Mr(calc)  | Delta   | Sequence                             | Site Analysis        |
|-------|-----------|---------|--------------------------------------|----------------------|
| 99.4  | 1915.8734 | 0.0084  | <a href="#">QDQCIYNTTYLNVQR</a>      | Deamidated N7 98.68% |
| 80.6  | 1915.8734 | 0.0084  | <a href="#">QDQCIYNTTYLNVQR</a>      | Deamidated N12 1.30% |
| 58.8  | 1915.8734 | 0.0084  | <a href="#">QDQCIYNTTYLNVQR</a>      | Deamidated Q3 0.01%  |
| 58.1  | 1915.8734 | 0.0084  | <a href="#">QDQCIYNTTYLNVQR</a>      | Deamidated Q14 0.01% |
| 37.5  | 1915.8734 | 0.0084  | <a href="#">QDQCIYNTTYLNVQR</a>      | Deamidated Q1 0.00%  |
| 7.1   | 1915.8880 | -0.0062 | <a href="#">MHDRSGMEQGLAANVVGK</a>   |                      |
| 5.9   | 1914.8820 | 0.9998  | <a href="#">EQQQGSSPAGHGAGPPVPGR</a> |                      |
| 5.9   | 1914.8820 | 0.9998  | <a href="#">EQQQGSSPAGHGAGPPVPGR</a> |                      |
| 5.3   | 1915.8813 | 0.0005  | <a href="#">FVVPNSNYSVSGHQSHR</a>    |                      |
| 5.1   | 1914.8806 | 1.0012  | <a href="#">EEQEEQENRPKLINR</a>      |                      |

Mascot: <http://www.matrixscience.com/>



# MATRIX SCIENCE Mascot Search Results

## Peptide View

MS/MS Fragmentation of **QDQCIYNTTYLNVQR**

Found in **P02763** in **con\_Xuniprot\_HUMAN3**, A1AG1\_HUMAN Alpha-1-acid glycoprotein 1 OS=Homo sapiens GN=ORM1 PE=1 SV=1

Match to Query 11605: 1916.855348 from(959.434950,2+) intensity(4687.6553) rtinseconds(1317) scans(3111) index(20237)

Title: 111019\_Est\_MI\_YP\_G\_10Spectrum2708\_scans\_\_3111

Data file C:\\mascot\\20140703\_Tmgf\_1D\\CSV\_UseAnalysis\\MasterCSV\\All\_Glyco\\mgf\\ptm\\UC18ERLIC\_PTM\_35D.mgf

Click mouse within plot area to zoom in by factor of two about that point

Or, to Da

Label all possible matches Label matches used for scoring

Show Y-axis

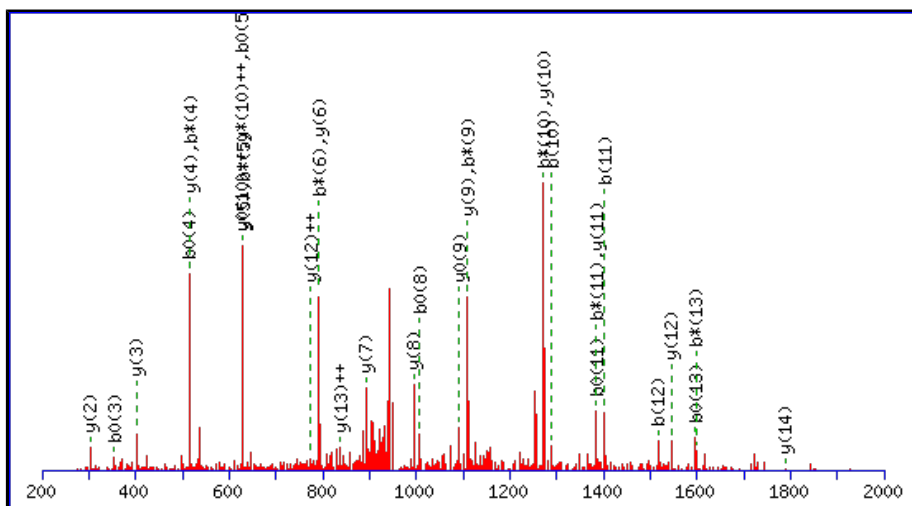

Monoisotopic mass of neutral peptide Mr(calc): 1916.8574

Fixed modifications: Carbamidomethyl (C) (apply to specified residues or termini only)

Variable modifications:

Q3 : Deamidated (NQ)

N7 : Deamidated (NQ)

Ions Score: 72 Expect: 7.6e-006

Matches : 33/154 fragment ions using 48 most intense peaks ([help](#))

| #  | b         | b <sup>++</sup> | b*        | b <sup>*++</sup> | b <sup>0</sup> | b <sup>0++</sup> | Seq. | y         | y <sup>++</sup> | y*        | y <sup>*++</sup> | y <sup>0</sup> | y <sup>0++</sup> | #  |
|----|-----------|-----------------|-----------|------------------|----------------|------------------|------|-----------|-----------------|-----------|------------------|----------------|------------------|----|
| 1  | 129.0659  | 65.0366         | 112.0393  | 56.5233          |                |                  | Q    |           |                 |           |                  |                |                  | 15 |
| 2  | 244.0928  | 122.5500        | 227.0662  | 114.0368         | 226.0822       | 113.5448         | D    | 1789.8061 | 895.4067        | 1772.7796 | 886.8934         | 1771.7956      | 886.4014         | 14 |
| 3  | 373.1354  | 187.0713        | 356.1088  | 178.5581         | 355.1248       | 178.0661         | Q    | 1674.7792 | 837.8932        | 1657.7527 | 829.3800         | 1656.7686      | 828.8880         | 13 |
| 4  | 533.1660  | 267.0867        | 516.1395  | 258.5734         | 515.1555       | 258.0814         | C    | 1545.7366 | 773.3719        | 1528.7101 | 764.8587         | 1527.7260      | 764.3667         | 12 |
| 5  | 646.2501  | 323.6287        | 629.2236  | 315.1154         | 628.2395       | 314.6234         | I    | 1385.7060 | 693.3566        | 1368.6794 | 684.8433         | 1367.6954      | 684.3513         | 11 |
| 6  | 809.3134  | 405.1604        | 792.2869  | 396.6471         | 791.3029       | 396.1551         | Y    | 1272.6219 | 636.8146        | 1255.5953 | 628.3013         | 1254.6113      | 627.8093         | 10 |
| 7  | 924.3404  | 462.6738        | 907.3138  | 454.1606         | 906.3298       | 453.6685         | N    | 1109.5586 | 555.2829        | 1092.5320 | 546.7696         | 1091.5480      | 546.2776         | 9  |
| 8  | 1025.3881 | 513.1977        | 1008.3615 | 504.6844         | 1007.3775      | 504.1924         | T    | 994.5316  | 497.7694        | 977.5051  | 489.2562         | 976.5211       | 488.7642         | 8  |
| 9  | 1126.4357 | 563.7215        | 1109.4092 | 555.2082         | 1108.4252      | 554.7162         | T    | 893.4839  | 447.2456        | 876.4574  | 438.7323         | 875.4734       | 438.2403         | 7  |
| 10 | 1289.4991 | 645.2532        | 1272.4725 | 636.7399         | 1271.4885      | 636.2479         | Y    | 792.4363  | 396.7218        | 775.4097  | 388.2085         |                |                  | 6  |
| 11 | 1402.5831 | 701.7952        | 1385.5566 | 693.2819         | 1384.5726      | 692.7899         | L    | 629.3729  | 315.1901        | 612.3464  | 306.6768         |                |                  | 5  |
| 12 | 1516.6261 | 758.8167        | 1499.5995 | 750.3034         | 1498.6155      | 749.8114         | N    | 516.2889  | 258.6481        | 499.2623  | 250.1348         |                |                  | 4  |
| 13 | 1615.6945 | 808.3509        | 1598.6679 | 799.8376         | 1597.6839      | 799.3456         | V    | 402.2459  | 201.6266        | 385.2194  | 193.1133         |                |                  | 3  |
| 14 | 1743.7530 | 872.3802        | 1726.7265 | 863.8669         | 1725.7425      | 863.3749         | Q    | 303.1775  | 152.0924        | 286.1510  | 143.5791         |                |                  | 2  |
| 15 |           |                 |           |                  |                |                  | R    | 175.1190  | 88.0631         | 158.0924  | 79.5498          |                |                  | 1  |



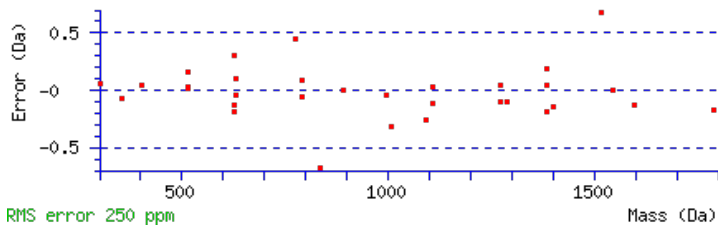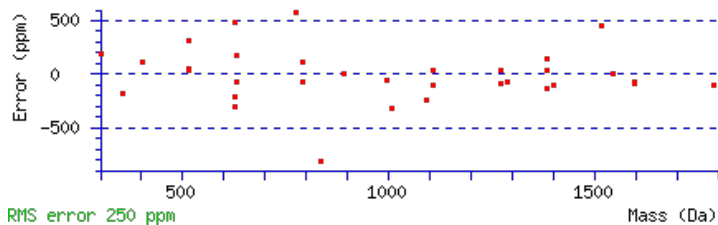

NCBI BLAST search of [QDQCIYNTTYLNVQR](#)

(Parameters: blastp, nr protein database, expect=20000, no filter, PAM30)

Other BLAST [web gateways](#)

**All matches to this query**

| Score | Mr(calc)  | Delta   | Sequence                          | Site Analysis            |
|-------|-----------|---------|-----------------------------------|--------------------------|
| 71.9  | 1916.8574 | -0.0021 | <a href="#">QDQCIYNTTYLNVQR</a>   | Deamidated Q3, N7 75.33% |
| 65.2  | 1916.8574 | -0.0021 | <a href="#">QDQCIYNTTYLNVQR</a>   | Deamidated Q1, N7 16.18% |
| 61.3  | 1916.8574 | -0.0021 | <a href="#">QDQCIYNTTYLNVQR</a>   | Deamidated Q3, N12 6.62% |
| 51.3  | 1916.8574 | -0.0021 | <a href="#">QDQCIYNTTYLNVQR</a>   | Deamidated Q1, Q3 0.66%  |
| 51.3  | 1916.8574 | -0.0021 | <a href="#">QDQCIYNTTYLNVQR</a>   | Deamidated Q1, N12 0.66% |
| 48.1  | 1916.8574 | -0.0021 | <a href="#">QDQCIYNTTYLNVQR</a>   | Deamidated Q3, Q14 0.32% |
| 45.5  | 1916.8574 | -0.0021 | <a href="#">QDQCIYNTTYLNVQR</a>   | Deamidated N7, N12 0.17% |
| 39.3  | 1916.8574 | -0.0021 | <a href="#">QDQCIYNTTYLNVQR</a>   | Deamidated Q1, Q14 0.04% |
| 33.7  | 1916.8574 | -0.0021 | <a href="#">QDQCIYNTTYLNVQR</a>   | Deamidated N7, Q14 0.01% |
| 9.2   | 1916.8588 | -0.0035 | <a href="#">GDNDLLTGHYVCGFHGR</a> |                          |

Mascot: <http://www.matrixscience.com/>

# MASCOT SCIENCE Mascot Search Results

## Peptide View

MS/MS Fragmentation of **EYQTRQDQCIYNTTYLNVQR**

Found in **P02763** in **con\_Xuniprot\_HUMAN3**, A1AG1\_HUMAN Alpha-1-acid glycoprotein 1 OS=Homo sapiens GN=ORM1 PE=1 SV=1

Match to Query 22190: 2593.194042 from(865.405290,3+) intensity(90556.7109) rtinseconds(1218) scans(2834) index(12498)

Title: 111019\_Est\_ISCardio\_NMI\_YS\_G\_9Spectrum2462\_scans\_\_2834

Data file C:\mascot\20140703\_Tmgf\_1D\CSV\_UseAnalysis\MasterCSV\All\_Glyco\mgf\ptm\UC18ERLIC\_PTM\_35D.mgf

Click mouse within plot area to zoom in by factor of two about that point

Or, to Da

Label all possible matches Label matches used for scoring

Show Y-axis

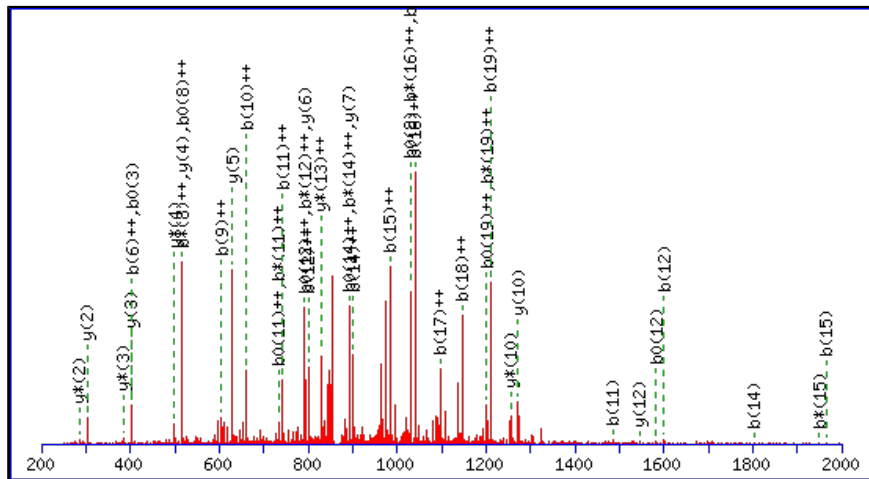

Monoisotopic mass of neutral peptide Mr(calc): 2593.1867

Fixed modifications: Carbamidomethyl (C) (apply to specified residues or termini only)

Variable modifications:

N12 : Deamidated (NQ)

Ions Score: 62 Expect: 0.00012

Matches : 44/212 fragment ions using 54 most intense peaks ([help](#))

| #  | b         | b <sup>++</sup> | b <sup>*</sup> | b <sup>*++</sup> | b <sup>0</sup> | b <sup>0++</sup> | Seq. | y         | y <sup>++</sup> | y <sup>*</sup> | y <sup>*++</sup> | y <sup>0</sup> | y <sup>0++</sup> | #  |
|----|-----------|-----------------|----------------|------------------|----------------|------------------|------|-----------|-----------------|----------------|------------------|----------------|------------------|----|
| 1  | 130.0499  | 65.5286         |                |                  | 112.0393       | 56.5233          | E    |           |                 |                |                  |                |                  | 20 |
| 2  | 293.1132  | 147.0602        |                |                  | 275.1026       | 138.0550         | Y    | 2465.1514 | 1233.0793       | 2448.1249      | 1224.5661        | 2447.1408      | 1224.0741        | 19 |
| 3  | 421.1718  | 211.0895        | 404.1452       | 202.5763         | 403.1612       | 202.0842         | Q    | 2302.0881 | 1151.5477       | 2285.0615      | 1143.0344        | 2284.0775      | 1142.5424        | 18 |
| 4  | 522.2195  | 261.6134        | 505.1929       | 253.1001         | 504.2089       | 252.6081         | T    | 2174.0295 | 1087.5184       | 2157.0029      | 1079.0051        | 2156.0189      | 1078.5131        | 17 |
| 5  | 678.3206  | 339.6639        | 661.2940       | 331.1506         | 660.3100       | 330.6586         | R    | 2072.9818 | 1036.9945       | 2055.9553      | 1028.4813        | 2054.9713      | 1027.9893        | 16 |
| 6  | 806.3791  | 403.6932        | 789.3526       | 395.1799         | 788.3686       | 394.6879         | Q    | 1916.8807 | 958.9440        | 1899.8542      | 950.4307         | 1898.8701      | 949.9387         | 15 |
| 7  | 921.4061  | 461.2067        | 904.3795       | 452.6934         | 903.3955       | 452.2014         | D    | 1788.8221 | 894.9147        | 1771.7956      | 886.4014         | 1770.8116      | 885.9094         | 14 |
| 8  | 1049.4647 | 525.2360        | 1032.4381      | 516.7227         | 1031.4541      | 516.2307         | Q    | 1673.7952 | 837.4012        | 1656.7686      | 828.8880         | 1655.7846      | 828.3959         | 13 |
| 9  | 1209.4953 | 605.2513        | 1192.4688      | 596.7380         | 1191.4847      | 596.2460         | C    | 1545.7366 | 773.3719        | 1528.7101      | 764.8587         | 1527.7260      | 764.3667         | 12 |
| 10 | 1322.5794 | 661.7933        | 1305.5528      | 653.2801         | 1304.5688      | 652.7880         | I    | 1385.7060 | 693.3566        | 1368.6794      | 684.8433         | 1367.6954      | 684.3513         | 11 |
| 11 | 1485.6427 | 743.3250        | 1468.6162      | 734.8117         | 1467.6321      | 734.3197         | Y    | 1272.6219 | 636.8146        | 1255.5953      | 628.3013         | 1254.6113      | 627.8093         | 10 |
| 12 | 1600.6697 | 800.8385        | 1583.6431      | 792.3252         | 1582.6591      | 791.8332         | N    | 1109.5586 | 555.2829        | 1092.5320      | 546.7696         | 1091.5480      | 546.2776         | 9  |
| 13 | 1701.7173 | 851.3623        | 1684.6908      | 842.8490         | 1683.7068      | 842.3570         | T    | 994.5316  | 497.7694        | 977.5051       | 489.2562         | 976.5211       | 488.7642         | 8  |
| 14 | 1802.7650 | 901.8861        | 1785.7385      | 893.3729         | 1784.7544      | 892.8809         | T    | 893.4839  | 447.2456        | 876.4574       | 438.7323         | 875.4734       | 438.2403         | 7  |
| 15 | 1965.8283 | 983.4178        | 1948.8018      | 974.9045         | 1947.8178      | 974.4125         | Y    | 792.4363  | 396.7218        | 775.4097       | 388.2085         |                |                  | 6  |
| 16 | 2078.9124 | 1039.9598       | 2061.8859      | 1031.4466        | 2060.9018      | 1030.9546        | L    | 629.3729  | 315.1901        | 612.3464       | 306.6768         |                |                  | 5  |
| 17 | 2192.9553 | 1096.9813       | 2175.9288      | 1088.4680        | 2174.9448      | 1087.9760        | N    | 516.2889  | 258.6481        | 499.2623       | 250.1348         |                |                  | 4  |
| 18 | 2292.0237 | 1146.5155       | 2274.9972      | 1138.0022        | 2274.0132      | 1137.5102        | V    | 402.2459  | 201.6266        | 385.2194       | 193.1133         |                |                  | 3  |
| 19 | 2420.0823 | 1210.5448       | 2403.0558      | 1202.0315        | 2402.0718      | 1201.5395        | Q    | 303.1775  | 152.0924        | 286.1510       | 143.5791         |                |                  | 2  |
| 20 |           |                 |                |                  |                |                  | R    | 175.1190  | 88.0631         | 158.0924       | 79.5498          |                |                  | 1  |

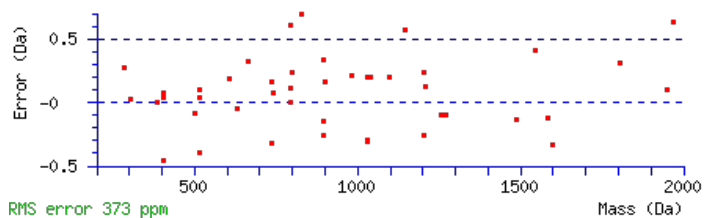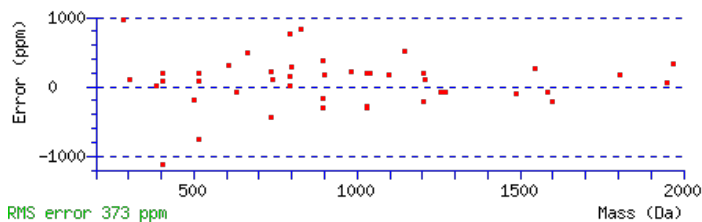

NCBI BLAST search of [EYQTRQDQCIYNTTYLNVQR](#)

(Parameters: blastp, nr protein database, expect=20000, no filter, PAM30)

Other BLAST [web gateways](#)

**All matches to this query**

| Score | Mr(calc)  | Delta  | Sequence                                  | Site Analysis         |
|-------|-----------|--------|-------------------------------------------|-----------------------|
| 62.0  | 2593.1867 | 0.0074 | <a href="#">EYQTRQDQCIYNTTYLNVQR</a>      | Deamidated N12 75.85% |
| 56.2  | 2593.1867 | 0.0074 | <a href="#">EYQTRQDQCIYNTTYLNVQR</a>      | Deamidated Q8 19.63%  |
| 46.3  | 2593.1867 | 0.0074 | <a href="#">EYQTRQDQCIYNTTYLNVQR</a>      | Deamidated Q6 2.02%   |
| 45.0  | 2593.1867 | 0.0074 | <a href="#">EYQTRQDQCIYNTTYLNVQR</a>      | Deamidated Q3 1.51%   |
| 42.0  | 2593.1867 | 0.0074 | <a href="#">EYQTRQDQCIYNTTYLNVQR</a>      | Deamidated N17 0.74%  |
| 39.8  | 2592.2027 | 0.9914 | <a href="#">EYQTRQDQCIYNTTYLNVQR</a>      |                       |
| 37.0  | 2593.1867 | 0.0074 | <a href="#">EYQTRQDQCIYNTTYLNVQR</a>      | Deamidated Q19 0.24%  |
| 8.8   | 2593.1822 | 0.0119 | <a href="#">LNLGRLPGMTQGNLTQSMQNMPR</a>   |                       |
| 7.7   | 2592.2012 | 0.9929 | <a href="#">SRNGTSPNLESNVNINSGTETGTSR</a> |                       |
| 6.0   | 2593.1853 | 0.0087 | <a href="#">NIWSPGTNGQISLLDNTVGRMAET</a>  |                       |

Mascot: <http://www.matrixscience.com/>

# MATRIX SCIENCE Mascot Search Results

## Peptide View

MS/MS Fragmentation of **QDQCIYNTTYLNVQRENGTISR**

Found in **P02763** in **con\_Xuniprot\_HUMAN3**, A1AG1\_HUMAN Alpha-1-acid glycoprotein 1 OS=Homo sapiens GN=ORM1 PE=1 SV=1

Match to Query 22476: 2674.236492 from(892.419440,3+) intensity(9456.8760) rtinseconds(1414) scans(3307) index(20715)

Title: 111019\_Est\_ML\_YP\_G\_11Spectrum2895\_scans\_\_3307

Data file C:\mascot\20140703\_Tmgf\_1D\CSV\_UseAnalysis\MasterCSV\All\_Glyco\mgf\ptm\UC18ERLIC\_PTM\_35D.mgf

Click mouse within plot area to zoom in by factor of two about that point

Or, to Da

Label all possible matches Label matches used for scoring

Show Y-axis

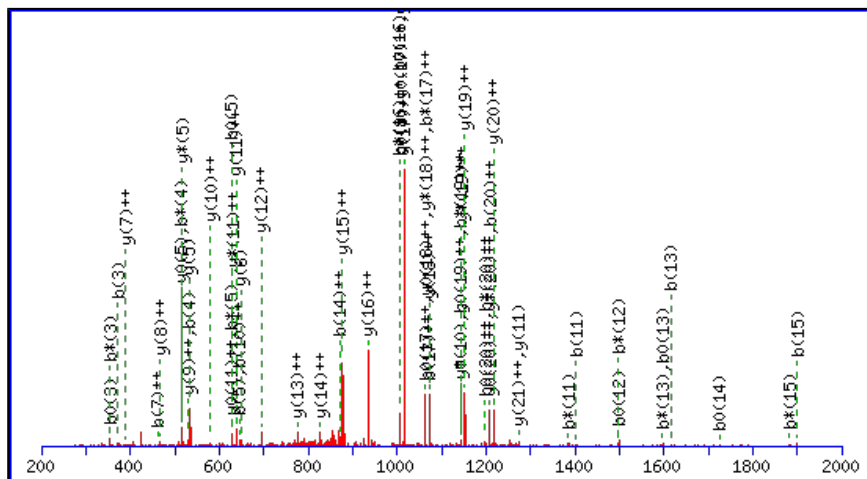

Monoisotopic mass of neutral peptide Mr(calc): 2674.2293

Fixed modifications: Carbamidomethyl (C) (apply to specified residues or termini only)

Variable modifications:

N7 : Deamidated (NQ)

N17 : Deamidated (NQ)

Ions Score: 55 Expect: 0.00056

Matches : 65/248 fragment ions using 124 most intense peaks ([help](#))

| #  | b         | b <sup>++</sup> | b*        | b <sup>*++</sup> | b <sup>0</sup> | b <sup>0++</sup> | Seq. | y         | y <sup>++</sup> | y*        | y <sup>*++</sup> | y <sup>0</sup> | y <sup>0++</sup> | #  |
|----|-----------|-----------------|-----------|------------------|----------------|------------------|------|-----------|-----------------|-----------|------------------|----------------|------------------|----|
| 1  | 129.0659  | 65.0366         | 112.0393  | 56.5233          |                |                  | Q    |           |                 |           |                  |                |                  | 22 |
| 2  | 244.0928  | 122.5500        | 227.0662  | 114.0368         | 226.0822       | 113.5448         | D    | 2547.1780 | 1274.0926       | 2530.1515 | 1265.5794        | 2529.1674      | 1265.0874        | 21 |
| 3  | 372.1514  | 186.5793        | 355.1248  | 178.0661         | 354.1408       | 177.5740         | Q    | 2432.1511 | 1216.5792       | 2415.1245 | 1208.0659        | 2414.1405      | 1207.5739        | 20 |
| 4  | 532.1820  | 266.5947        | 515.1555  | 258.0814         | 514.1715       | 257.5894         | C    | 2304.0925 | 1152.5499       | 2287.0659 | 1144.0366        | 2286.0819      | 1143.5446        | 19 |
| 5  | 645.2661  | 323.1367        | 628.2395  | 314.6234         | 627.2555       | 314.1314         | I    | 2144.0618 | 1072.5346       | 2127.0353 | 1064.0213        | 2126.0513      | 1063.5293        | 18 |
| 6  | 808.3294  | 404.6683        | 791.3029  | 396.1551         | 790.3189       | 395.6631         | Y    | 2030.9778 | 1015.9925       | 2013.9512 | 1007.4793        | 2012.9672      | 1006.9872        | 17 |
| 7  | 923.3564  | 462.1818        | 906.3298  | 453.6685         | 905.3458       | 453.1765         | N    | 1867.9144 | 934.4609        | 1850.8879 | 925.9476         | 1849.9039      | 925.4556         | 16 |
| 8  | 1024.4040 | 512.7057        | 1007.3775 | 504.1924         | 1006.3935      | 503.7004         | T    | 1752.8875 | 876.9474        | 1735.8610 | 868.4341         | 1734.8769      | 867.9421         | 15 |
| 9  | 1125.4517 | 563.2295        | 1108.4252 | 554.7162         | 1107.4412      | 554.2242         | T    | 1651.8398 | 826.4236        | 1634.8133 | 817.9103         | 1633.8293      | 817.4183         | 14 |
| 10 | 1288.5150 | 644.7612        | 1271.4885 | 636.2479         | 1270.5045      | 635.7559         | Y    | 1550.7921 | 775.8997        | 1533.7656 | 767.3864         | 1532.7816      | 766.8944         | 13 |
| 11 | 1401.5991 | 701.3032        | 1384.5726 | 692.7899         | 1383.5885      | 692.2979         | L    | 1387.7288 | 694.3680        | 1370.7023 | 685.8548         | 1369.7183      | 685.3628         | 12 |
| 12 | 1515.6420 | 758.3247        | 1498.6155 | 749.8114         | 1497.6315      | 749.3194         | N    | 1274.6448 | 637.8260        | 1257.6182 | 629.3127         | 1256.6342      | 628.8207         | 11 |
| 13 | 1614.7105 | 807.8589        | 1597.6839 | 799.3456         | 1596.6999      | 798.8536         | V    | 1160.6018 | 580.8046        | 1143.5753 | 572.2913         | 1142.5913      | 571.7993         | 10 |
| 14 | 1742.7690 | 871.8882        | 1725.7425 | 863.3749         | 1724.7585      | 862.8829         | Q    | 1061.5334 | 531.2703        | 1044.5069 | 522.7571         | 1043.5228      | 522.2651         | 9  |
| 15 | 1898.8701 | 949.9387        | 1881.8436 | 941.4254         | 1880.8596      | 940.9334         | R    | 933.4748  | 467.2411        | 916.4483  | 458.7278         | 915.4643       | 458.2358         | 8  |
| 16 | 2027.9127 | 1014.4600       | 2010.8862 | 1005.9467        | 2009.9022      | 1005.4547        | E    | 777.3737  | 389.1905        | 760.3472  | 380.6772         | 759.3632       | 380.1852         | 7  |
| 17 | 2142.9397 | 1071.9735       | 2125.9131 | 1063.4602        | 2124.9291      | 1062.9682        | N    | 648.3311  | 324.6692        | 631.3046  | 316.1559         | 630.3206       | 315.6639         | 6  |
| 18 | 2199.9611 | 1100.4842       | 2182.9346 | 1091.9709        | 2181.9506      | 1091.4789        | G    | 533.3042  | 267.1557        | 516.2776  | 258.6425         | 515.2936       | 258.1504         | 5  |
| 19 | 2301.0088 | 1151.0080       | 2283.9823 | 1142.4948        | 2282.9983      | 1142.0028        | T    | 476.2827  | 238.6450        | 459.2562  | 230.1317         | 458.2722       | 229.6397         | 4  |
| 20 | 2414.0929 | 1207.5501       | 2397.0663 | 1199.0368        | 2396.0823      | 1198.5448        | I    | 375.2350  | 188.1212        | 358.2085  | 179.6079         | 357.2245       | 179.1159         | 3  |
| 21 | 2501.1249 | 1251.0661       | 2484.0984 | 1242.5528        | 2483.1143      | 1242.0608        | S    | 262.1510  | 131.5791        | 245.1244  | 123.0659         | 244.1404       | 122.5738         | 2  |
| 22 |           |                 |           |                  |                |                  | R    | 175.1190  | 88.0631         | 158.0924  | 79.5498          |                |                  | 1  |

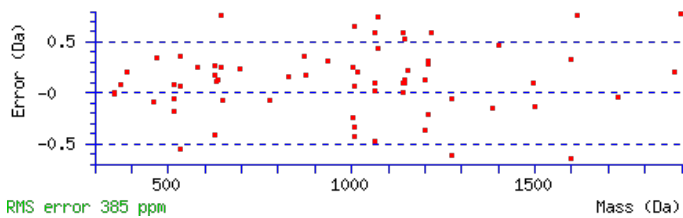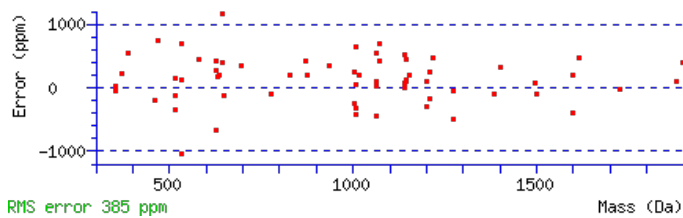

NCBI BLAST search of [QDQCIYNTTYLNVQRENGTISR](#)

(Parameters: blastp, nr protein database, expect=20000, no filter, PAM30)

Other BLAST [web gateways](#)

All matches to this query

| Score | Mr(calc)  | Delta  | Sequence                               | Site Analysis              |
|-------|-----------|--------|----------------------------------------|----------------------------|
| 55.5  | 2674.2293 | 0.0072 | <a href="#">QDQCIYNTTYLNVQRENGTISR</a> | Deamidated N7, N17 45.13%  |
| 51.9  | 2674.2293 | 0.0072 | <a href="#">QDQCIYNTTYLNVQRENGTISR</a> | Deamidated N12, N17 19.84% |
| 47.9  | 2674.2293 | 0.0072 | <a href="#">QDQCIYNTTYLNVQRENGTISR</a> | Deamidated Q14, N17 7.88%  |
| 47.4  | 2674.2293 | 0.0072 | <a href="#">QDQCIYNTTYLNVQRENGTISR</a> | Deamidated N7, Q14 7.04%   |
| 46.7  | 2674.2293 | 0.0072 | <a href="#">QDQCIYNTTYLNVQRENGTISR</a> | Deamidated Q3, N17 6.00%   |
| 44.9  | 2674.2293 | 0.0072 | <a href="#">QDQCIYNTTYLNVQRENGTISR</a> | Deamidated Q1, N17 3.96%   |
| 44.1  | 2674.2293 | 0.0072 | <a href="#">QDQCIYNTTYLNVQRENGTISR</a> | Deamidated N12, Q14 3.31%  |
| 42.2  | 2674.2293 | 0.0072 | <a href="#">QDQCIYNTTYLNVQRENGTISR</a> | Deamidated N7, N12 2.13%   |
| 39.2  | 2674.2293 | 0.0072 | <a href="#">QDQCIYNTTYLNVQRENGTISR</a> | Deamidated Q3, Q14 1.08%   |
| 37.6  | 2674.2293 | 0.0072 | <a href="#">QDQCIYNTTYLNVQRENGTISR</a> | Deamidated Q1, Q14 0.73%   |

Mascot: <http://www.matrixscience.com/>

# MATRIX SCIENCE Mascot Search Results

## Peptide View

MS/MS Fragmentation of **QDQCIYNTTYLNVQRENGTISR**

Found in **P02763** in **con\_Xuniprot\_HUMAN3**, A1AG1\_HUMAN Alpha-1-acid glycoprotein 1 OS=Homo sapiens GN=ORM1 PE=1 SV=1

Match to Query 22478: 2674.239372 from(892.420400,3+) intensity(66870.8984) rtinseconds(1364) scans(3326) index(26584)

Title: 111019\_Est\_MI\_YS\_G\_09Spectrum2871\_scans\_\_3326

Data file C:\mascot\20140703\_Tmgf\_1D\CSV\_UseAnalysis\MasterCSV\All\_Glyco\mgf\ptm\UC18ERLIC\_PTM\_35D.mgf

Click mouse within plot area to zoom in by factor of two about that point

Or, to Da

Label all possible matches Label matches used for scoring

Show Y-axis

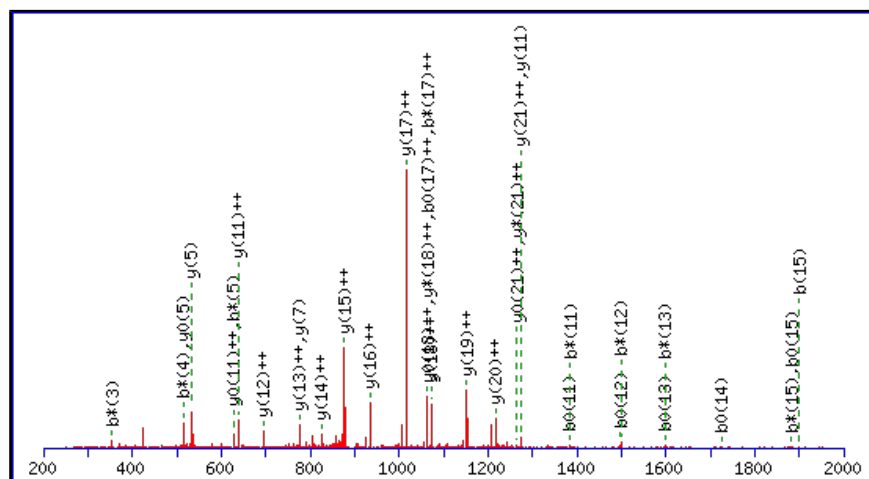

Monoisotopic mass of neutral peptide Mr(calc): 2674.2293

Fixed modifications: Carbamidomethyl (C) (apply to specified residues or termini only)

Variable modifications:

N7 : Deamidated (NQ)

N12 : Deamidated (NQ)

Ions Score: 54 Expect: 0.0009

Matches : 35/248 fragment ions using 35 most intense peaks ([help](#))

| #  | b         | b <sup>++</sup> | b*        | b <sup>*++</sup> | b <sup>0</sup> | b <sup>0++</sup> | Seq. | y         | y <sup>++</sup> | y*        | y <sup>*++</sup> | y <sup>0</sup> | y <sup>0++</sup> | #  |
|----|-----------|-----------------|-----------|------------------|----------------|------------------|------|-----------|-----------------|-----------|------------------|----------------|------------------|----|
| 1  | 129.0659  | 65.0366         | 112.0393  | 56.5233          |                |                  | Q    |           |                 |           |                  |                |                  | 22 |
| 2  | 244.0928  | 122.5500        | 227.0662  | 114.0368         | 226.0822       | 113.5448         | D    | 2547.1780 | 1274.0926       | 2530.1515 | 1265.5794        | 2529.1674      | 1265.0874        | 21 |
| 3  | 372.1514  | 186.5793        | 355.1248  | 178.0661         | 354.1408       | 177.5740         | Q    | 2432.1511 | 1216.5792       | 2415.1245 | 1208.0659        | 2414.1405      | 1207.5739        | 20 |
| 4  | 532.1820  | 266.5947        | 515.1555  | 258.0814         | 514.1715       | 257.5894         | C    | 2304.0925 | 1152.5499       | 2287.0659 | 1144.0366        | 2286.0819      | 1143.5446        | 19 |
| 5  | 645.2661  | 323.1367        | 628.2395  | 314.6234         | 627.2555       | 314.1314         | I    | 2144.0618 | 1072.5346       | 2127.0353 | 1064.0213        | 2126.0513      | 1063.5293        | 18 |
| 6  | 808.3294  | 404.6683        | 791.3029  | 396.1551         | 790.3189       | 395.6631         | Y    | 2030.9778 | 1015.9925       | 2013.9512 | 1007.4793        | 2012.9672      | 1006.9872        | 17 |
| 7  | 923.3564  | 462.1818        | 906.3298  | 453.6685         | 905.3458       | 453.1765         | N    | 1867.9144 | 934.4609        | 1850.8879 | 925.9476         | 1849.9039      | 925.4556         | 16 |
| 8  | 1024.4040 | 512.7057        | 1007.3775 | 504.1924         | 1006.3935      | 503.7004         | T    | 1752.8875 | 876.9474        | 1735.8610 | 868.4341         | 1734.8769      | 867.9421         | 15 |
| 9  | 1125.4517 | 563.2295        | 1108.4252 | 554.7162         | 1107.4412      | 554.2242         | T    | 1651.8398 | 826.4236        | 1634.8133 | 817.9103         | 1633.8293      | 817.4183         | 14 |
| 10 | 1288.5150 | 644.7612        | 1271.4885 | 636.2479         | 1270.5045      | 635.7559         | Y    | 1550.7921 | 775.8997        | 1533.7656 | 767.3864         | 1532.7816      | 766.8944         | 13 |
| 11 | 1401.5991 | 701.3032        | 1384.5726 | 692.7899         | 1383.5885      | 692.2979         | L    | 1387.7288 | 694.3680        | 1370.7023 | 685.8548         | 1369.7183      | 685.3628         | 12 |
| 12 | 1516.6261 | 758.8167        | 1499.5995 | 750.3034         | 1498.6155      | 749.8114         | N    | 1274.6448 | 637.8260        | 1257.6182 | 629.3127         | 1256.6342      | 628.8207         | 11 |
| 13 | 1615.6945 | 808.3509        | 1598.6679 | 799.8376         | 1597.6839      | 799.3456         | V    | 1159.6178 | 580.3125        | 1142.5913 | 571.7993         | 1141.6072      | 571.3073         | 10 |
| 14 | 1743.7530 | 872.3802        | 1726.7265 | 863.8669         | 1725.7425      | 863.3749         | Q    | 1060.5494 | 530.7783        | 1043.5228 | 522.2651         | 1042.5388      | 521.7731         | 9  |
| 15 | 1899.8542 | 950.4307        | 1882.8276 | 941.9174         | 1881.8436      | 941.4254         | R    | 932.4908  | 466.7490        | 915.4643  | 458.2358         | 914.4803       | 457.7438         | 8  |
| 16 | 2028.8968 | 1014.9520       | 2011.8702 | 1006.4387        | 2010.8862      | 1005.9467        | E    | 776.3897  | 388.6985        | 759.3632  | 380.1852         | 758.3791       | 379.6932         | 7  |
| 17 | 2142.9397 | 1071.9735       | 2125.9131 | 1063.4602        | 2124.9291      | 1062.9682        | N    | 647.3471  | 324.1772        | 630.3206  | 315.6639         | 629.3365       | 315.1719         | 6  |
| 18 | 2199.9611 | 1100.4842       | 2182.9346 | 1091.9709        | 2181.9506      | 1091.4789        | G    | 533.3042  | 267.1557        | 516.2776  | 258.6425         | 515.2936       | 258.1504         | 5  |
| 19 | 2301.0088 | 1151.0080       | 2283.9823 | 1142.4948        | 2282.9983      | 1142.0028        | T    | 476.2827  | 238.6450        | 459.2562  | 230.1317         | 458.2722       | 229.6397         | 4  |
| 20 | 2414.0929 | 1207.5501       | 2397.0663 | 1199.0368        | 2396.0823      | 1198.5448        | I    | 375.2350  | 188.1212        | 358.2085  | 179.6079         | 357.2245       | 179.1159         | 3  |
| 21 | 2501.1249 | 1251.0661       | 2484.0984 | 1242.5528        | 2483.1143      | 1242.0608        | S    | 262.1510  | 131.5791        | 245.1244  | 123.0659         | 244.1404       | 122.5738         | 2  |
| 22 |           |                 |           |                  |                |                  | R    | 175.1190  | 88.0631         | 158.0924  | 79.5498          |                |                  | 1  |

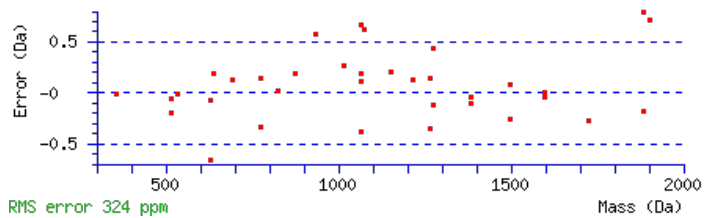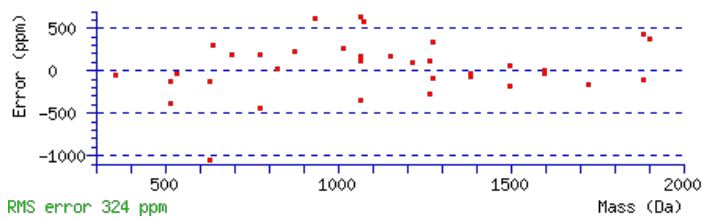

NCBI BLAST search of [QDQCIYNTTYLNVQRENGTISR](#)

(Parameters: blastp, nr protein database, expect=20000, no filter, PAM30)

Other BLAST [web gateways](#)

All matches to this query

| Score | Mr(calc)  | Delta  | Sequence                               | Site Analysis             |
|-------|-----------|--------|----------------------------------------|---------------------------|
| 53.6  | 2674.2293 | 0.0101 | <a href="#">QDQCIYNTTYLNVQRENGTISR</a> | Deamidated N7, N12 41.55% |
| 53.5  | 2674.2293 | 0.0101 | <a href="#">QDQCIYNTTYLNVQRENGTISR</a> | Deamidated N7, Q14 41.26% |
| 42.5  | 2674.2293 | 0.0101 | <a href="#">QDQCIYNTTYLNVQRENGTISR</a> | Deamidated N7, N17 3.23%  |
| 42.4  | 2674.2293 | 0.0101 | <a href="#">QDQCIYNTTYLNVQRENGTISR</a> | Deamidated N12, Q14 3.18% |
| 42.4  | 2674.2293 | 0.0101 | <a href="#">QDQCIYNTTYLNVQRENGTISR</a> | Deamidated Q14, N17 3.17% |
| 41.9  | 2674.2293 | 0.0101 | <a href="#">QDQCIYNTTYLNVQRENGTISR</a> | Deamidated N12, N17 2.85% |
| 38.6  | 2674.2293 | 0.0101 | <a href="#">QDQCIYNTTYLNVQRENGTISR</a> | Deamidated Q3, Q14 1.34%  |
| 38.6  | 2674.2293 | 0.0101 | <a href="#">QDQCIYNTTYLNVQRENGTISR</a> | Deamidated Q3, N12 1.34%  |
| 35.0  | 2674.2293 | 0.0101 | <a href="#">QDQCIYNTTYLNVQRENGTISR</a> | Deamidated Q3, N17 0.58%  |
| 32.2  | 2674.2293 | 0.0101 | <a href="#">QDQCIYNTTYLNVQRENGTISR</a> | Deamidated Q1, Q14 0.30%  |

Mascot: <http://www.matrixscience.com/>



# MASCOT SCIENCE Mascot Search Results

## Peptide View

MS/MS Fragmentation of **EYQTRQDQCIYNTTYLNVQRENGTISR**

Found in **P02763** in **con\_Xuniprot\_HUMAN3**, A1AG1\_HUMAN Alpha-1-acid glycoprotein 1 OS=Homo sapiens GN=ORM1 PE=1 SV=1

Match to Query 27506: 3351.550856 from(838.894990,4+) intensity(110283.2031) rtinseconds(1343) scans(3264) index(26573)

Title: 111019\_Est\_MI\_YS\_G\_09Spectrum2819\_scans\_\_3264

Data file C:\mascot\20140703\_Tmgf\_1D\CSV\_UseAnalysis\MasterCSV\All\_Glyco\mgf\ptm\UC18ERLIC\_PTM\_35D.mgf

Click mouse within plot area to zoom in by factor of two about that point

Or, to Da

Label all possible matches Label matches used for scoring

Show Y-axis

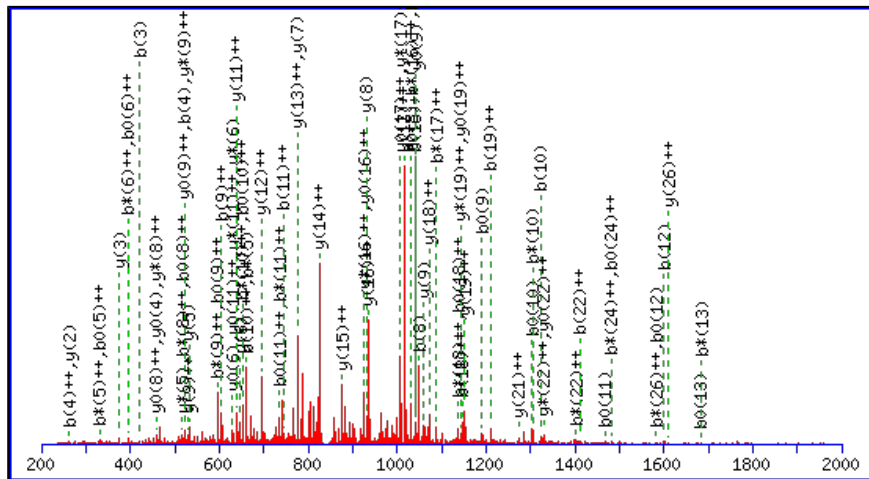

Monoisotopic mass of neutral peptide Mr(calc): 3351.5426

Fixed modifications: Carbamidomethyl (C) (apply to specified residues or termini only)

Variable modifications:

N12 : Deamidated (NQ)

N17 : Deamidated (NQ)

Ions Score: 44 Expect: 0.0093

Matches : 81/306 fragment ions using 118 most intense peaks ([help](#))

| #  | b         | b <sup>++</sup> | b <sup>*</sup> | b <sup>*++</sup> | b <sup>0</sup> | b <sup>0++</sup> | Seq. | y         | y <sup>++</sup> | y <sup>*</sup> | y <sup>*++</sup> | y <sup>0</sup> | y <sup>0++</sup> | #  |
|----|-----------|-----------------|----------------|------------------|----------------|------------------|------|-----------|-----------------|----------------|------------------|----------------|------------------|----|
| 1  | 130.0499  | 65.5286         |                |                  | 112.0393       | 56.5233          | E    |           |                 |                |                  |                |                  | 27 |
| 2  | 293.1132  | 147.0602        |                |                  | 275.1026       | 138.0550         | Y    | 3223.5073 | 1612.2573       | 3206.4807      | 1603.7440        | 3205.4967      | 1603.2520        | 26 |
| 3  | 421.1718  | 211.0895        | 404.1452       | 202.5763         | 403.1612       | 202.0842         | Q    | 3060.4440 | 1530.7256       | 3043.4174      | 1522.2123        | 3042.4334      | 1521.7203        | 25 |
| 4  | 522.2195  | 261.6134        | 505.1929       | 253.1001         | 504.2089       | 252.6081         | T    | 2932.3854 | 1466.6963       | 2915.3588      | 1458.1831        | 2914.3748      | 1457.6910        | 24 |
| 5  | 678.3206  | 339.6639        | 661.2940       | 331.1506         | 660.3100       | 330.6586         | R    | 2831.3377 | 1416.1725       | 2814.3111      | 1407.6592        | 2813.3271      | 1407.1672        | 23 |
| 6  | 806.3791  | 403.6932        | 789.3526       | 395.1799         | 788.3686       | 394.6879         | Q    | 2675.2366 | 1338.1219       | 2658.2100      | 1329.6087        | 2657.2260      | 1329.1166        | 22 |
| 7  | 921.4061  | 461.2067        | 904.3795       | 452.6934         | 903.3955       | 452.2014         | D    | 2547.1780 | 1274.0926       | 2530.1515      | 1265.5794        | 2529.1674      | 1265.0874        | 21 |
| 8  | 1049.4647 | 525.2360        | 1032.4381      | 516.7227         | 1031.4541      | 516.2307         | Q    | 2432.1511 | 1216.5792       | 2415.1245      | 1208.0659        | 2414.1405      | 1207.5739        | 20 |
| 9  | 1209.4953 | 605.2513        | 1192.4688      | 596.7380         | 1191.4847      | 596.2460         | C    | 2304.0925 | 1152.5499       | 2287.0659      | 1144.0366        | 2286.0819      | 1143.5446        | 19 |
| 10 | 1322.5794 | 661.7933        | 1305.5528      | 653.2801         | 1304.5688      | 652.7880         | I    | 2144.0618 | 1072.5346       | 2127.0353      | 1064.0213        | 2126.0513      | 1063.5293        | 18 |
| 11 | 1485.6427 | 743.3250        | 1468.6162      | 734.8117         | 1467.6321      | 734.3197         | Y    | 2030.9778 | 1015.9925       | 2013.9512      | 1007.4793        | 2012.9672      | 1006.9872        | 17 |
| 12 | 1600.6697 | 800.8385        | 1583.6431      | 792.3252         | 1582.6591      | 791.8332         | N    | 1867.9144 | 934.4609        | 1850.8879      | 925.9476         | 1849.9039      | 925.4556         | 16 |
| 13 | 1701.7173 | 851.3623        | 1684.6908      | 842.8490         | 1683.7068      | 842.3570         | T    | 1752.8875 | 876.9474        | 1735.8610      | 868.4341         | 1734.8769      | 867.9421         | 15 |
| 14 | 1802.7650 | 901.8861        | 1785.7385      | 893.3729         | 1784.7544      | 892.8809         | T    | 1651.8398 | 826.4236        | 1634.8133      | 817.9103         | 1633.8293      | 817.4183         | 14 |
| 15 | 1965.8283 | 983.4178        | 1948.8018      | 974.9045         | 1947.8178      | 974.4125         | Y    | 1550.7921 | 775.8997        | 1533.7656      | 767.3864         | 1532.7816      | 766.8944         | 13 |
| 16 | 2078.9124 | 1039.9598       | 2061.8859      | 1031.4466        | 2060.9018      | 1030.9546        | L    | 1387.7288 | 694.3680        | 1370.7023      | 685.8548         | 1369.7183      | 685.3628         | 12 |
| 17 | 2193.9393 | 1097.4733       | 2176.9128      | 1088.9600        | 2175.9288      | 1088.4680        | N    | 1274.6448 | 637.8260        | 1257.6182      | 629.3127         | 1256.6342      | 628.8207         | 11 |
| 18 | 2293.0078 | 1147.0075       | 2275.9812      | 1138.4942        | 2274.9972      | 1138.0022        | V    | 1159.6178 | 580.3125        | 1142.5913      | 571.7993         | 1141.6072      | 571.3073         | 10 |
| 19 | 2421.0663 | 1211.0368       | 2404.0398      | 1202.5235        | 2403.0558      | 1202.0315        | Q    | 1060.5494 | 530.7783        | 1043.5228      | 522.2651         | 1042.5388      | 521.7731         | 9  |
| 20 | 2577.1674 | 1289.0874       | 2560.1409      | 1280.5741        | 2559.1569      | 1280.0821        | R    | 932.4908  | 466.7490        | 915.4643       | 458.2358         | 914.4803       | 457.7438         | 8  |
| 21 | 2706.2100 | 1353.6087       | 2689.1835      | 1345.0954        | 2688.1995      | 1344.6034        | E    | 776.3897  | 388.6985        | 759.3632       | 380.1852         | 758.3791       | 379.6932         | 7  |
| 22 | 2820.2530 | 1410.6301       | 2803.2264      | 1402.1168        | 2802.2424      | 1401.6248        | N    | 647.3471  | 324.1772        | 630.3206       | 315.6639         | 629.3365       | 315.1719         | 6  |

|    |           |           |           |           |           |           |   |          |          |          |          |          |          |   |
|----|-----------|-----------|-----------|-----------|-----------|-----------|---|----------|----------|----------|----------|----------|----------|---|
| 23 | 2877.2744 | 1439.1409 | 2860.2479 | 1430.6276 | 2859.2639 | 1430.1356 | G | 533.3042 | 267.1557 | 516.2776 | 258.6425 | 515.2936 | 258.1504 | 5 |
| 24 | 2978.3221 | 1489.6647 | 2961.2956 | 1481.1514 | 2960.3115 | 1480.6594 | T | 476.2827 | 238.6450 | 459.2562 | 230.1317 | 458.2722 | 229.6397 | 4 |
| 25 | 3091.4062 | 1546.2067 | 3074.3796 | 1537.6935 | 3073.3956 | 1537.2014 | I | 375.2350 | 188.1212 | 358.2085 | 179.6079 | 357.2245 | 179.1159 | 3 |
| 26 | 3178.4382 | 1589.7227 | 3161.4117 | 1581.2095 | 3160.4276 | 1580.7175 | S | 262.1510 | 131.5791 | 245.1244 | 123.0659 | 244.1404 | 122.5738 | 2 |
| 27 |           |           |           |           |           |           | R | 175.1190 | 88.0631  | 158.0924 | 79.5498  |          |          | 1 |

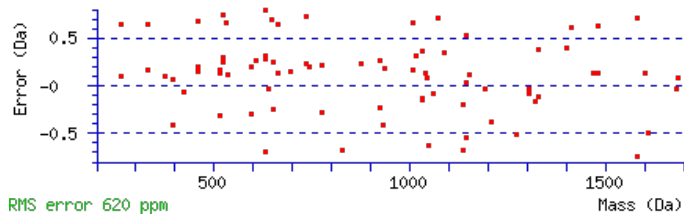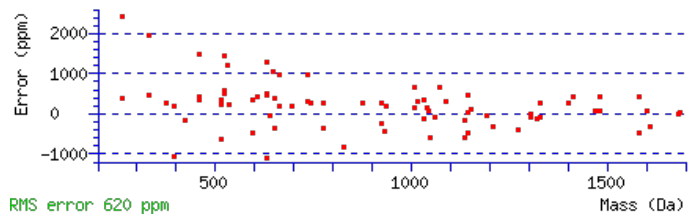

NCBI **BLAST** search of [EYQTRQDQCIYNTTYLNVQRENGTISR](#)  
 (Parameters: blastp, nr protein database, expect=20000, no filter, PAM30)  
 Other BLAST [web gateways](#)

**All matches to this query**

| Score | Mr(calc)  | Delta  | Sequence                                    | Site Analysis              |
|-------|-----------|--------|---------------------------------------------|----------------------------|
| 43.7  | 3351.5426 | 0.0083 | <a href="#">EYQTRQDQCIYNTTYLNVQRENGTISR</a> | Deamidated N12, N17 65.66% |
| 42.3  | 3350.5585 | 0.9923 | <a href="#">EYQTRQDQCIYNTTYLNVQRENGTISR</a> |                            |
| 37.0  | 3351.5426 | 0.0083 | <a href="#">EYQTRQDQCIYNTTYLNVQRENGTISR</a> | Deamidated Q19, N22 14.01% |
| 36.8  | 3350.5585 | 0.9923 | <a href="#">EYQTRQDQCIYNTTYLNVQRENGTISR</a> |                            |
| 34.1  | 3350.5585 | 0.9923 | <a href="#">EYQTRQDQCIYNTTYLNVQRENGTISR</a> |                            |
| 33.2  | 3351.5426 | 0.0083 | <a href="#">EYQTRQDQCIYNTTYLNVQRENGTISR</a> | Deamidated N17, Q19 5.77%  |
| 32.8  | 3351.5426 | 0.0083 | <a href="#">EYQTRQDQCIYNTTYLNVQRENGTISR</a> | Deamidated Q3, N22 5.26%   |
| 32.6  | 3350.5585 | 0.9923 | <a href="#">EYQTRQDQCIYNTTYLNVQRENGTISR</a> |                            |
| 31.3  | 3351.5426 | 0.0083 | <a href="#">EYQTRQDQCIYNTTYLNVQRENGTISR</a> | Deamidated Q8, N12 3.76%   |
| 21.9  | 3350.5585 | 0.9923 | <a href="#">EYQTRQDQCIYNTTYLNVQRENGTISR</a> |                            |

Mascot: <http://www.matrixscience.com/>

# MASCOT SCIENCE Mascot Search Results

## Peptide View

MS/MS Fragmentation of **QDQCIYNTTYLNVQRENGTISR**

Found in **P02763** in **con\_Xuniprot\_HUMAN3**, A1AG1\_HUMAN Alpha-1-acid glycoprotein 1 OS=Homo sapiens GN=ORM1 PE=1 SV=1

Match to Query 22474: 2674.230792 from(892.417540,3+) intensity(781.5458) rtinseconds(1415) scans(2745) index(21592)

Title: 111019\_Est\_MI\_YP\_G\_14Spectrum2329\_scans\_\_2745

Data file C:\mascot\20140703\_Tmgf\_1D\CSV\_UseAnalysis\MasterCSV\All\_Glyco\mgf\ptm\UC18ERLIC\_PTM\_35D.mgf

Click mouse within plot area to zoom in by factor of two about that point

Or, to Da

Label all possible matches Label matches used for scoring

Show Y-axis

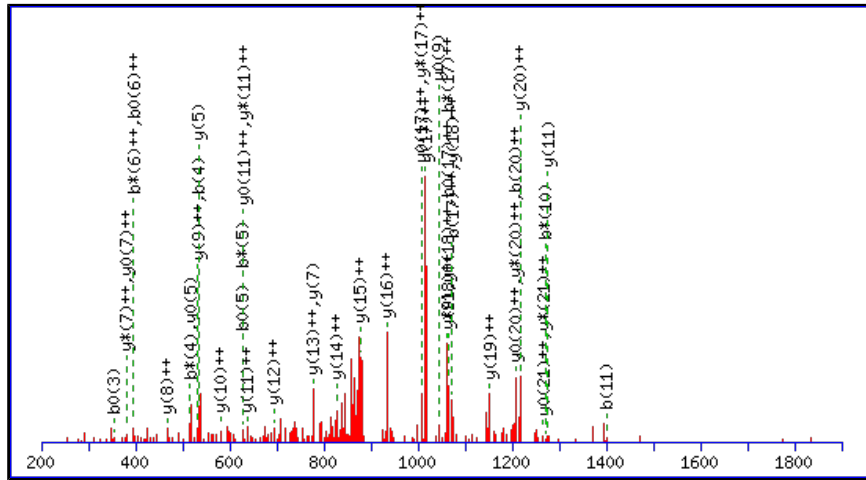

Monoisotopic mass of neutral peptide Mr(calc): 2674.2293

Fixed modifications: Carbamidomethyl (C) (apply to specified residues or termini only)

Variable modifications:

Q14 : Deamidated (NQ)

N17 : Deamidated (NQ)

Ions Score: 41 Expect: 0.015

Matches : 44/248 fragment ions using 83 most intense peaks ([help](#))

| #  | b         | b <sup>++</sup> | b*        | b <sup>*++</sup> | b <sup>0</sup> | b <sup>0++</sup> | Seq. | y         | y <sup>++</sup> | y*        | y <sup>*++</sup> | y <sup>0</sup> | y <sup>0++</sup> | #  |
|----|-----------|-----------------|-----------|------------------|----------------|------------------|------|-----------|-----------------|-----------|------------------|----------------|------------------|----|
| 1  | 129.0659  | 65.0366         | 112.0393  | 56.5233          |                |                  | Q    |           |                 |           |                  |                |                  | 22 |
| 2  | 244.0928  | 122.5500        | 227.0662  | 114.0368         | 226.0822       | 113.5448         | D    | 2547.1780 | 1274.0926       | 2530.1515 | 1265.5794        | 2529.1674      | 1265.0874        | 21 |
| 3  | 372.1514  | 186.5793        | 355.1248  | 178.0661         | 354.1408       | 177.5740         | Q    | 2432.1511 | 1216.5792       | 2415.1245 | 1208.0659        | 2414.1405      | 1207.5739        | 20 |
| 4  | 532.1820  | 266.5947        | 515.1555  | 258.0814         | 514.1715       | 257.5894         | C    | 2304.0925 | 1152.5499       | 2287.0659 | 1144.0366        | 2286.0819      | 1143.5446        | 19 |
| 5  | 645.2661  | 323.1367        | 628.2395  | 314.6234         | 627.2555       | 314.1314         | I    | 2144.0618 | 1072.5346       | 2127.0353 | 1064.0213        | 2126.0513      | 1063.5293        | 18 |
| 6  | 808.3294  | 404.6683        | 791.3029  | 396.1551         | 790.3189       | 395.6631         | Y    | 2030.9778 | 1015.9925       | 2013.9512 | 1007.4793        | 2012.9672      | 1006.9872        | 17 |
| 7  | 922.3723  | 461.6898        | 905.3458  | 453.1765         | 904.3618       | 452.6845         | N    | 1867.9144 | 934.4609        | 1850.8879 | 925.9476         | 1849.9039      | 925.4556         | 16 |
| 8  | 1023.4200 | 512.2136        | 1006.3935 | 503.7004         | 1005.4095      | 503.2084         | T    | 1753.8715 | 877.4394        | 1736.8450 | 868.9261         | 1735.8610      | 868.4341         | 15 |
| 9  | 1124.4677 | 562.7375        | 1107.4412 | 554.2242         | 1106.4571      | 553.7322         | T    | 1652.8238 | 826.9156        | 1635.7973 | 818.4023         | 1634.8133      | 817.9103         | 14 |
| 10 | 1287.5310 | 644.2692        | 1270.5045 | 635.7559         | 1269.5205      | 635.2639         | Y    | 1551.7762 | 776.3917        | 1534.7496 | 767.8784         | 1533.7656      | 767.3864         | 13 |
| 11 | 1400.6151 | 700.8112        | 1383.5885 | 692.2979         | 1382.6045      | 691.8059         | L    | 1388.7128 | 694.8601        | 1371.6863 | 686.3468         | 1370.7023      | 685.8548         | 12 |
| 12 | 1514.6580 | 757.8326        | 1497.6315 | 749.3194         | 1496.6475      | 748.8274         | N    | 1275.6288 | 638.3180        | 1258.6022 | 629.8047         | 1257.6182      | 629.3127         | 11 |
| 13 | 1613.7264 | 807.3669        | 1596.6999 | 798.8536         | 1595.7159      | 798.3616         | V    | 1161.5858 | 581.2966        | 1144.5593 | 572.7833         | 1143.5753      | 572.2913         | 10 |
| 14 | 1742.7690 | 871.8882        | 1725.7425 | 863.3749         | 1724.7585      | 862.8829         | Q    | 1062.5174 | 531.7624        | 1045.4909 | 523.2491         | 1044.5069      | 522.7571         | 9  |
| 15 | 1898.8701 | 949.9387        | 1881.8436 | 941.4254         | 1880.8596      | 940.9334         | R    | 933.4748  | 467.2411        | 916.4483  | 458.7278         | 915.4643       | 458.2358         | 8  |
| 16 | 2027.9127 | 1014.4600       | 2010.8862 | 1005.9467        | 2009.9022      | 1005.4547        | E    | 777.3737  | 389.1905        | 760.3472  | 380.6772         | 759.3632       | 380.1852         | 7  |
| 17 | 2142.9397 | 1071.9735       | 2125.9131 | 1063.4602        | 2124.9291      | 1062.9682        | N    | 648.3311  | 324.6692        | 631.3046  | 316.1559         | 630.3206       | 315.6639         | 6  |
| 18 | 2199.9611 | 1100.4842       | 2182.9346 | 1091.9709        | 2181.9506      | 1091.4789        | G    | 533.3042  | 267.1557        | 516.2776  | 258.6425         | 515.2936       | 258.1504         | 5  |
| 19 | 2301.0088 | 1151.0080       | 2283.9823 | 1142.4948        | 2282.9983      | 1142.0028        | T    | 476.2827  | 238.6450        | 459.2562  | 230.1317         | 458.2722       | 229.6397         | 4  |
| 20 | 2414.0929 | 1207.5501       | 2397.0663 | 1199.0368        | 2396.0823      | 1198.5448        | I    | 375.2350  | 188.1212        | 358.2085  | 179.6079         | 357.2245       | 179.1159         | 3  |
| 21 | 2501.1249 | 1251.0661       | 2484.0984 | 1242.5528        | 2483.1143      | 1242.0608        | S    | 262.1510  | 131.5791        | 245.1244  | 123.0659         | 244.1404       | 122.5738         | 2  |
| 22 |           |                 |           |                  |                |                  | R    | 175.1190  | 88.0631         | 158.0924  | 79.5498          |                |                  | 1  |

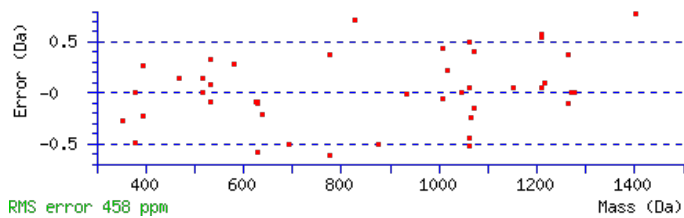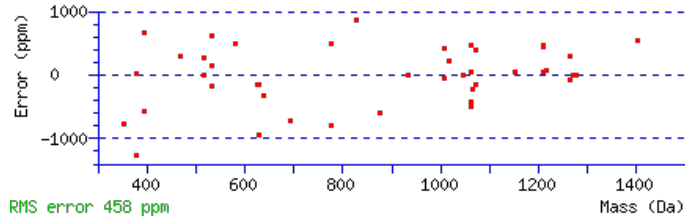

NCBI BLAST search of [QDQCIYNTTYLNVQRENGTISR](#)

(Parameters: blastp, nr protein database, expect=20000, no filter, PAM30)

Other BLAST [web gateways](#)

All matches to this query

| Score | Mr(calc)  | Delta  | Sequence                               | Site Analysis              |
|-------|-----------|--------|----------------------------------------|----------------------------|
| 40.9  | 2674.2293 | 0.0015 | <a href="#">QDQCIYNTTYLNVQRENGTISR</a> | Deamidated Q14, N17 70.10% |
| 34.1  | 2674.2293 | 0.0015 | <a href="#">QDQCIYNTTYLNVQRENGTISR</a> | Deamidated N12, N17 14.75% |
| 34.1  | 2674.2293 | 0.0015 | <a href="#">QDQCIYNTTYLNVQRENGTISR</a> | Deamidated N12, Q14 14.75% |
| 10.7  | 2674.2293 | 0.0015 | <a href="#">QDQCIYNTTYLNVQRENGTISR</a> | Deamidated N7, N17 0.07%   |
| 10.7  | 2674.2293 | 0.0015 | <a href="#">QDQCIYNTTYLNVQRENGTISR</a> | Deamidated N7, Q14 0.07%   |
| 9.4   | 2674.2293 | 0.0015 | <a href="#">QDQCIYNTTYLNVQRENGTISR</a> | Deamidated N7, N12 0.05%   |
| 7.0   | 2674.2293 | 0.0015 | <a href="#">QDQCIYNTTYLNVQRENGTISR</a> | Deamidated Q3, N17 0.03%   |
| 7.0   | 2674.2293 | 0.0015 | <a href="#">QDQCIYNTTYLNVQRENGTISR</a> | Deamidated Q3, Q14 0.03%   |
| 7.0   | 2674.2293 | 0.0015 | <a href="#">QDQCIYNTTYLNVQRENGTISR</a> | Deamidated Q3, N12 0.03%   |
| 7.0   | 2674.2293 | 0.0015 | <a href="#">QDQCIYNTTYLNVQRENGTISR</a> | Deamidated Q1, N17 0.03%   |

Mascot: <http://www.matrixscience.com/>

# MASCOT SCIENCE Mascot Search Results

## Peptide View

MS/MS Fragmentation of **QDQCIYNTTYLNVQRENGTISR**

Found in **P02763** in **con\_Xuniprot\_HUMAN3**, A1AG1\_HUMAN Alpha-1-acid glycoprotein 1 OS=Homo sapiens GN=ORM1 PE=1 SV=1

Match to Query 22479: 2674.243182 from(892.421670,3+) intensity(3724.8096) rtinseconds(1391) scans(3251) index(20711)

Title: 111019\_Est\_MI\_YP\_G\_11Spectrum2845\_scans\_\_3251

Data file C:\mascot\20140703\_Tmgf\_1D\CSV\_UseAnalysis\MasterCSV\All\_Glyco\mgf\ptm\UC18ERLIC\_PTM\_35D.mgf

Click mouse within plot area to zoom in by factor of two about that point

Or, to Da

Label all possible matches Label matches used for scoring

Show Y-axis

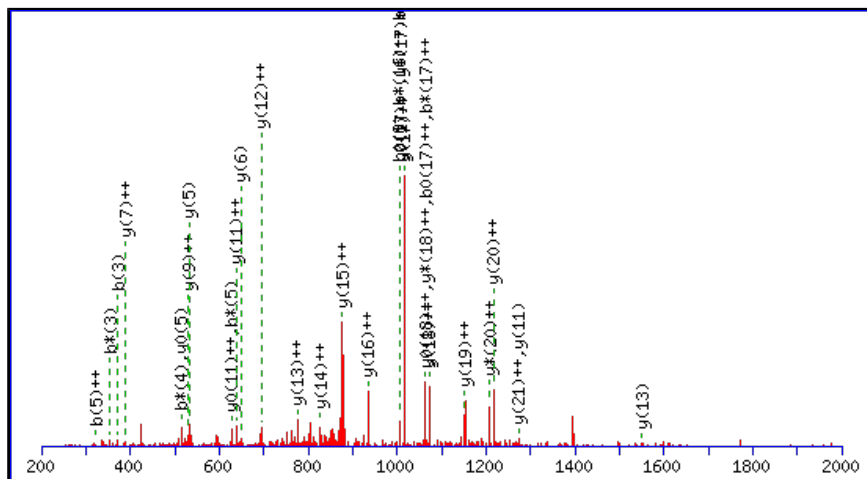

Monoisotopic mass of neutral peptide Mr(calc): 2673.2453

Fixed modifications: Carbamidomethyl (C) (apply to specified residues or termini only)

Variable modifications:

N17 : Deamidated (NQ)

Ions Score: 38 Expect: 0.033

Matches : 34/248 fragment ions using 76 most intense peaks ([help](#))

| #  | b         | b <sup>++</sup> | b <sup>*</sup> | b <sup>*++</sup> | b <sup>0</sup> | b <sup>0++</sup> | Seq. | y         | y <sup>++</sup> | y <sup>*</sup> | y <sup>*++</sup> | y <sup>0</sup> | y <sup>0++</sup> | #  |
|----|-----------|-----------------|----------------|------------------|----------------|------------------|------|-----------|-----------------|----------------|------------------|----------------|------------------|----|
| 1  | 129.0659  | 65.0366         | 112.0393       | 56.5233          |                |                  | Q    |           |                 |                |                  |                |                  | 22 |
| 2  | 244.0928  | 122.5500        | 227.0662       | 114.0368         | 226.0822       | 113.5448         | D    | 2546.1940 | 1273.6006       | 2529.1674      | 1265.0874        | 2528.1834      | 1264.5954        | 21 |
| 3  | 372.1514  | 186.5793        | 355.1248       | 178.0661         | 354.1408       | 177.5740         | Q    | 2431.1671 | 1216.0872       | 2414.1405      | 1207.5739        | 2413.1565      | 1207.0819        | 20 |
| 4  | 532.1820  | 266.5947        | 515.1555       | 258.0814         | 514.1715       | 257.5894         | C    | 2303.1085 | 1152.0579       | 2286.0819      | 1143.5446        | 2285.0979      | 1143.0526        | 19 |
| 5  | 645.2661  | 323.1367        | 628.2395       | 314.6234         | 627.2555       | 314.1314         | I    | 2143.0778 | 1072.0425       | 2126.0513      | 1063.5293        | 2125.0673      | 1063.0373        | 18 |
| 6  | 808.3294  | 404.6683        | 791.3029       | 396.1551         | 790.3189       | 395.6631         | Y    | 2029.9938 | 1015.5005       | 2012.9672      | 1006.9872        | 2011.9832      | 1006.4952        | 17 |
| 7  | 922.3723  | 461.6898        | 905.3458       | 453.1765         | 904.3618       | 452.6845         | N    | 1866.9304 | 933.9689        | 1849.9039      | 925.4556         | 1848.9199      | 924.9636         | 16 |
| 8  | 1023.4200 | 512.2136        | 1006.3935      | 503.7004         | 1005.4095      | 503.2084         | T    | 1752.8875 | 876.9474        | 1735.8610      | 868.4341         | 1734.8769      | 867.9421         | 15 |
| 9  | 1124.4677 | 562.7375        | 1107.4412      | 554.2242         | 1106.4571      | 553.7322         | T    | 1651.8398 | 826.4236        | 1634.8133      | 817.9103         | 1633.8293      | 817.4183         | 14 |
| 10 | 1287.5310 | 644.2692        | 1270.5045      | 635.7559         | 1269.5205      | 635.2639         | Y    | 1550.7921 | 775.8997        | 1533.7656      | 767.3864         | 1532.7816      | 766.8944         | 13 |
| 11 | 1400.6151 | 700.8112        | 1383.5885      | 692.2979         | 1382.6045      | 691.8059         | L    | 1387.7288 | 694.3680        | 1370.7023      | 685.8548         | 1369.7183      | 685.3628         | 12 |
| 12 | 1514.6580 | 757.8326        | 1497.6315      | 749.3194         | 1496.6475      | 748.8274         | N    | 1274.6448 | 637.8260        | 1257.6182      | 629.3127         | 1256.6342      | 628.8207         | 11 |
| 13 | 1613.7264 | 807.3669        | 1596.6999      | 798.8536         | 1595.7159      | 798.3616         | V    | 1160.6018 | 580.8046        | 1143.5753      | 572.2913         | 1142.5913      | 571.7993         | 10 |
| 14 | 1741.7850 | 871.3961        | 1724.7585      | 862.8829         | 1723.7744      | 862.3909         | Q    | 1061.5334 | 531.2703        | 1044.5069      | 522.7571         | 1043.5228      | 522.2651         | 9  |
| 15 | 1897.8861 | 949.4467        | 1880.8596      | 940.9334         | 1879.8756      | 940.4414         | R    | 933.4748  | 467.2411        | 916.4483       | 458.7278         | 915.4643       | 458.2358         | 8  |
| 16 | 2026.9287 | 1013.9680       | 2009.9022      | 1005.4547        | 2008.9182      | 1004.9627        | E    | 777.3737  | 389.1905        | 760.3472       | 380.6772         | 759.3632       | 380.1852         | 7  |
| 17 | 2141.9557 | 1071.4815       | 2124.9291      | 1062.9682        | 2123.9451      | 1062.4762        | N    | 648.3311  | 324.6692        | 631.3046       | 316.1559         | 630.3206       | 315.6639         | 6  |
| 18 | 2198.9771 | 1099.9922       | 2181.9506      | 1091.4789        | 2180.9666      | 1090.9869        | G    | 533.3042  | 267.1557        | 516.2776       | 258.6425         | 515.2936       | 258.1504         | 5  |
| 19 | 2300.0248 | 1150.5160       | 2282.9983      | 1142.0028        | 2282.0142      | 1141.5108        | T    | 476.2827  | 238.6450        | 459.2562       | 230.1317         | 458.2722       | 229.6397         | 4  |
| 20 | 2413.1089 | 1207.0581       | 2396.0823      | 1198.5448        | 2395.0983      | 1198.0528        | I    | 375.2350  | 188.1212        | 358.2085       | 179.6079         | 357.2245       | 179.1159         | 3  |
| 21 | 2500.1409 | 1250.5741       | 2483.1143      | 1242.0608        | 2482.1303      | 1241.5688        | S    | 262.1510  | 131.5791        | 245.1244       | 123.0659         | 244.1404       | 122.5738         | 2  |
| 22 |           |                 |                |                  |                |                  | R    | 175.1190  | 88.0631         | 158.0924       | 79.5498          |                |                  | 1  |

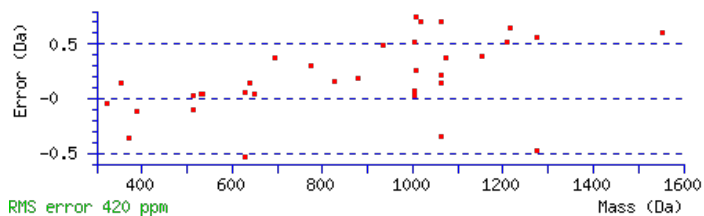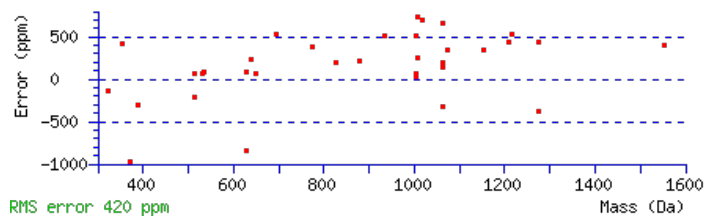

NCBI BLAST search of [QDQCIYNTTYLNVQRENGTISR](#)

(Parameters: blastp, nr protein database, expect=20000, no filter, PAM30)

Other BLAST [web gateways](#)

All matches to this query

| Score | Mr(calc)  | Delta  | Sequence                                  | Site Analysis         |
|-------|-----------|--------|-------------------------------------------|-----------------------|
| 38.0  | 2673.2453 | 0.9979 | <a href="#">QDQCIYNTTYLNVQRENGTISR</a>    | Deamidated N17 40.04% |
| 36.6  | 2673.2453 | 0.9979 | <a href="#">QDQCIYNTTYLNVQRENGTISR</a>    | Deamidated Q14 28.68% |
| 36.6  | 2673.2453 | 0.9979 | <a href="#">QDQCIYNTTYLNVQRENGTISR</a>    | Deamidated N12 28.68% |
| 25.9  | 2673.2453 | 0.9979 | <a href="#">QDQCIYNTTYLNVQRENGTISR</a>    | Deamidated N7 2.46%   |
| 12.8  | 2673.2453 | 0.9979 | <a href="#">QDQCIYNTTYLNVQRENGTISR</a>    | Deamidated Q3 0.12%   |
| 11.0  | 2674.2367 | 0.0065 | <a href="#">FPQEQSCASSIESCPHPEKKIK</a>    |                       |
| 8.9   | 2674.2367 | 0.0065 | <a href="#">FPQEQSCASSIESCPHPEKKIK</a>    |                       |
| 7.5   | 2673.2340 | 1.0092 | <a href="#">INGSIPAGPKQEPCAQHNGSEPASP</a> |                       |
| 5.9   | 2673.2300 | 1.0132 | <a href="#">MNNGGKAEKENTPSEANLQEEEV</a>   |                       |
| 5.5   | 2674.2340 | 0.0091 | <a href="#">ESAQATGSPHTSPTHGGGRPMPMPV</a> |                       |

Mascot: <http://www.matrixscience.com/>

# MASCOT SCIENCE Mascot Search Results

## Peptide View

MS/MS Fragmentation of **QEPERNECFLQHKDDNPPLPR**

Found in **H7C013** in **con\_Xuniprot\_HUMAN3**, H7C013\_HUMAN Serum albumin (Fragment) OS=Homo sapiens GN=ALB PE=2 SV=1

Match to Query 22357: 2636.203256 from(660.058090,4+) intensity(4326.5254) rtinseconds(566) scans(990) index(13057)

Title: 111019\_Est\_ISCardio\_NMI\_YS\_G\_10Spectrum769\_scans\_\_990

Data file C:\mascot\20140703\_Tmgf\_1D\CSV\_UseAnalysis\MasterCSV\All\_Glyco\mgf\ptm\UC18ERLIC\_PTM\_35D.mgf

Click mouse within plot area to zoom in by factor of two about that point

Or, to Da

Label all possible matches Label matches used for scoring

Show Y-axis

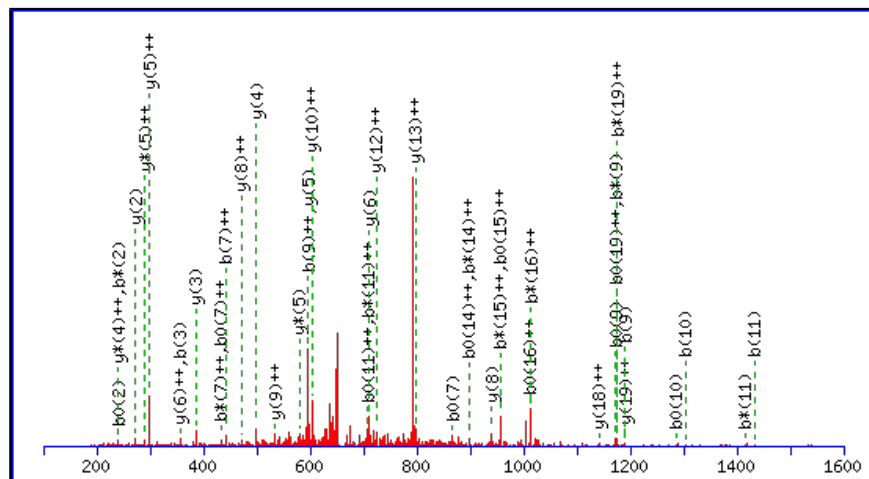

Monoisotopic mass of neutral peptide Mr(calc): 2636.2037

Fixed modifications: Carbamidomethyl (C) (apply to specified residues or termini only)

Variable modifications:

N6 : Deamidated (NQ)

Ions Score: 47 Expect: 0.0033

Matches : 43/226 fragment ions using 54 most intense peaks ([help](#))

| #  | b         | b <sup>++</sup> | b <sup>*</sup> | b <sup>*++</sup> | b <sup>0</sup> | b <sup>0++</sup> | Seq. | y         | y <sup>++</sup> | y <sup>*</sup> | y <sup>*++</sup> | y <sup>0</sup> | y <sup>0++</sup> | #  |
|----|-----------|-----------------|----------------|------------------|----------------|------------------|------|-----------|-----------------|----------------|------------------|----------------|------------------|----|
| 1  | 129.0659  | 65.0366         | 112.0393       | 56.5233          |                |                  | Q    |           |                 |                |                  |                |                  | 21 |
| 2  | 258.1084  | 129.5579        | 241.0819       | 121.0446         | 240.0979       | 120.5526         | E    | 2509.1525 | 1255.0799       | 2492.1259      | 1246.5666        | 2491.1419      | 1246.0746        | 20 |
| 3  | 355.1612  | 178.0842        | 338.1347       | 169.5710         | 337.1506       | 169.0790         | P    | 2380.1099 | 1190.5586       | 2363.0833      | 1182.0453        | 2362.0993      | 1181.5533        | 19 |
| 4  | 484.2038  | 242.6055        | 467.1773       | 234.0923         | 466.1932       | 233.6003         | E    | 2283.0571 | 1142.0322       | 2266.0306      | 1133.5189        | 2265.0465      | 1133.0269        | 18 |
| 5  | 640.3049  | 320.6561        | 623.2784       | 312.1428         | 622.2944       | 311.6508         | R    | 2154.0145 | 1077.5109       | 2136.9880      | 1068.9976        | 2136.0039      | 1068.5056        | 17 |
| 6  | 755.3319  | 378.1696        | 738.3053       | 369.6563         | 737.3213       | 369.1643         | N    | 1997.9134 | 999.4603        | 1980.8869      | 990.9471         | 1979.9028      | 990.4551         | 16 |
| 7  | 884.3745  | 442.6909        | 867.3479       | 434.1776         | 866.3639       | 433.6856         | E    | 1882.8865 | 941.9469        | 1865.8599      | 933.4336         | 1864.8759      | 932.9416         | 15 |
| 8  | 1044.4051 | 522.7062        | 1027.3786      | 514.1929         | 1026.3945      | 513.7009         | C    | 1753.8439 | 877.4256        | 1736.8173      | 868.9123         | 1735.8333      | 868.4203         | 14 |
| 9  | 1191.4735 | 596.2404        | 1174.4470      | 587.7271         | 1173.4629      | 587.2351         | F    | 1593.8132 | 797.4102        | 1576.7867      | 788.8970         | 1575.8027      | 788.4050         | 13 |
| 10 | 1304.5576 | 652.7824        | 1287.5310      | 644.2692         | 1286.5470      | 643.7771         | L    | 1446.7448 | 723.8760        | 1429.7183      | 715.3628         | 1428.7342      | 714.8708         | 12 |
| 11 | 1432.6162 | 716.8117        | 1415.5896      | 708.2984         | 1414.6056      | 707.8064         | Q    | 1333.6607 | 667.3340        | 1316.6342      | 658.8207         | 1315.6502      | 658.3287         | 11 |
| 12 | 1569.6751 | 785.3412        | 1552.6485      | 776.8279         | 1551.6645      | 776.3359         | H    | 1205.6022 | 603.3047        | 1188.5756      | 594.7914         | 1187.5916      | 594.2994         | 10 |
| 13 | 1697.7700 | 849.3887        | 1680.7435      | 840.8754         | 1679.7595      | 840.3834         | K    | 1068.5432 | 534.7753        | 1051.5167      | 526.2620         | 1050.5327      | 525.7700         | 9  |
| 14 | 1812.7970 | 906.9021        | 1795.7704      | 898.3889         | 1794.7864      | 897.8968         | D    | 940.4483  | 470.7278        | 923.4217       | 462.2145         | 922.4377       | 461.7225         | 8  |
| 15 | 1927.8239 | 964.4156        | 1910.7974      | 955.9023         | 1909.8134      | 955.4103         | D    | 825.4213  | 413.2143        | 808.3948       | 404.7010         | 807.4108       | 404.2090         | 7  |
| 16 | 2041.8668 | 1021.4371       | 2024.8403      | 1012.9238        | 2023.8563      | 1012.4318        | N    | 710.3944  | 355.7008        | 693.3678       | 347.1876         |                |                  | 6  |
| 17 | 2138.9196 | 1069.9634       | 2121.8931      | 1061.4502        | 2120.9090      | 1060.9582        | P    | 596.3515  | 298.6794        | 579.3249       | 290.1661         |                |                  | 5  |
| 18 | 2252.9625 | 1126.9849       | 2235.9360      | 1118.4716        | 2234.9520      | 1117.9796        | N    | 499.2987  | 250.1530        | 482.2722       | 241.6397         |                |                  | 4  |
| 19 | 2366.0466 | 1183.5269       | 2349.0201      | 1175.0137        | 2348.0360      | 1174.5217        | L    | 385.2558  | 193.1315        | 368.2292       | 184.6183         |                |                  | 3  |
| 20 | 2463.0994 | 1232.0533       | 2446.0728      | 1223.5400        | 2445.0888      | 1223.0480        | P    | 272.1717  | 136.5895        | 255.1452       | 128.0762         |                |                  | 2  |
| 21 |           |                 |                |                  |                |                  | R    | 175.1190  | 88.0631         | 158.0924       | 79.5498          |                |                  | 1  |



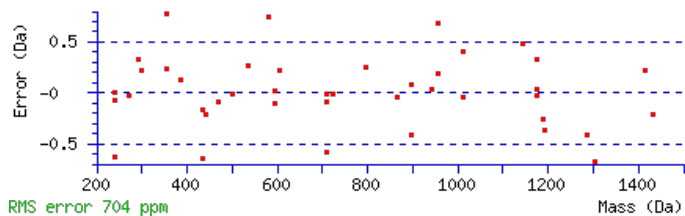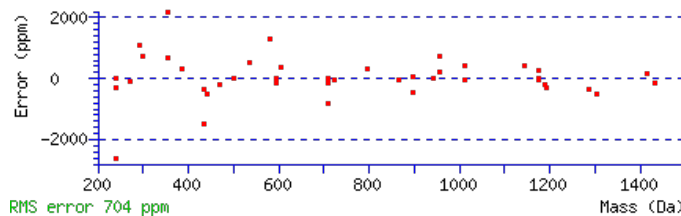

NCBI BLAST search of [QEPERNECFLOHKDDNPNLPR](#)

(Parameters: blastp, nr protein database, expect=20000, no filter, PAM30)

Other BLAST [web gateways](#)

**All matches to this query**

| Score | Mr(calc)  | Delta   | Sequence                                    | Site Analysis         |
|-------|-----------|---------|---------------------------------------------|-----------------------|
| 47.2  | 2636.2037 | -0.0005 | <a href="#">QEPERNECFLOHKDDNPNLPR</a>       | Deamidated N6 42.60%  |
| 46.0  | 2636.2037 | -0.0005 | <a href="#">QEPERNECFLOHKDDNPNLPR</a>       | Deamidated Q11 31.87% |
| 43.5  | 2636.2037 | -0.0005 | <a href="#">QEPERNECFLOHKDDNPNLPR</a>       | Deamidated Q1 18.25%  |
| 38.7  | 2636.2037 | -0.0005 | <a href="#">QEPERNECFLOHKDDNPNLPR</a>       | Deamidated N16 5.98%  |
| 32.1  | 2636.2037 | -0.0005 | <a href="#">QEPERNECFLOHKDDNPNLPR</a>       | Deamidated N18 1.30%  |
| 12.8  | 2636.1999 | 0.0034  | <a href="#">NLMYNGMADEVNKKIQFPPGGR</a>      |                       |
| 12.1  | 2636.2123 | -0.0090 | <a href="#">VDGIPNDSSDSEMEDKTTANLAALK</a>   |                       |
| 7.8   | 2636.1919 | 0.0114  | <a href="#">QEIQIDLECRSSTSPCGTSKSPNR</a>    |                       |
| 5.2   | 2636.2098 | -0.0065 | <a href="#">LKGVMVNLGEMNNKPPPGSDASGGYGK</a> |                       |
| 5.1   | 2636.2064 | -0.0032 | <a href="#">KRAGGANSNVFSMFEQTOIQEFK</a>     |                       |

Mascot: <http://www.matrixscience.com/>

# MASCOT SCIENCE Mascot Search Results

## Peptide View

MS/MS Fragmentation of **NECFLQHKDDNP**LPR

Found in **H7C013** in **con\_Xuniprot\_HUMAN3**, H7C013\_HUMAN Serum albumin (Fragment) OS=Homo sapiens GN=ALB PE=2 SV=1

Match to Query 12214: 1996.911942 from(666.644590,3+) intensity(13401.8525) rtinseconds(746) scans(1554) index(13333)

Title: 111019\_Est\_ISCardio\_NMI\_YS\_G\_12Spectrum1310\_scans\_\_1554

Data file C:\\mascot\\20140703\_Tmgf\_1D\\CSV\_UseAnalysis\\MasterCSV\\All\_Glyco\\mgf\\ptm\\UC18ERLIC\_PTM\_35D.mgf

Click mouse within plot area to zoom in by factor of two about that point

Or, to Da

Label all possible matches Label matches used for scoring

Show Y-axis

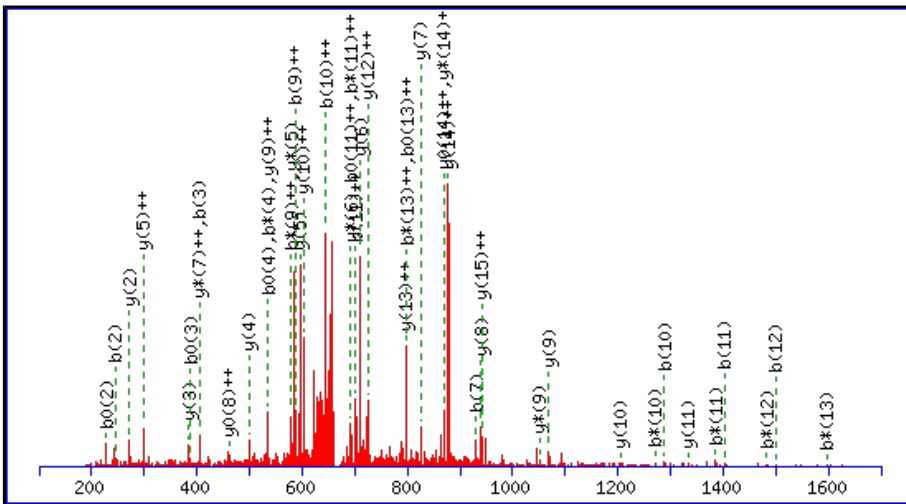

Monoisotopic mass of neutral peptide Mr(calc): 1996.9061

Fixed modifications: Carbamidomethyl (C) (apply to specified residues or termini only)

Variable modifications:

N1 : Deamidated (NQ)

Ions Score: 40 Expect: 0.017

Matches : 46/166 fragment ions using 98 most intense peaks ([help](#))

| #  | b                | b <sup>++</sup> | b <sup>*</sup>   | b <sup>*++</sup> | b <sup>0</sup>  | b <sup>0++</sup> | Seq. | y                | y <sup>++</sup> | y <sup>*</sup>   | y <sup>*++</sup> | y <sup>0</sup> | y <sup>0++</sup> | #  |
|----|------------------|-----------------|------------------|------------------|-----------------|------------------|------|------------------|-----------------|------------------|------------------|----------------|------------------|----|
| 1  | 116.0342         | 58.5207         | 99.0077          | 50.0075          |                 |                  | N    |                  |                 |                  |                  |                |                  | 16 |
| 2  | <b>245.0768</b>  | 123.0420        | 228.0503         | 114.5288         | <b>227.0662</b> | 114.0368         | E    | 1882.8865        | <b>941.9469</b> | 1865.8599        | 933.4336         | 1864.8759      | 932.9416         | 15 |
| 3  | <b>405.1075</b>  | 203.0574        | 388.0809         | 194.5441         | <b>387.0969</b> | 194.0521         | C    | 1753.8439        | <b>877.4256</b> | 1736.8173        | <b>868.9123</b>  | 1735.8333      | <b>868.4203</b>  | 14 |
| 4  | 552.1759         | 276.5916        | <b>535.1493</b>  | 268.0783         | <b>534.1653</b> | 267.5863         | F    | 1593.8132        | <b>797.4102</b> | 1576.7867        | 788.8970         | 1575.8026      | 788.4050         | 13 |
| 5  | 665.2599         | 333.1336        | 648.2334         | 324.6203         | 647.2494        | 324.1283         | L    | 1446.7448        | <b>723.8760</b> | 1429.7183        | 715.3628         | 1428.7342      | 714.8708         | 12 |
| 6  | 793.3185         | 397.1629        | 776.2920         | 388.6496         | 775.3080        | 388.1576         | Q    | <b>1333.6607</b> | 667.3340        | 1316.6342        | 658.8207         | 1315.6502      | 658.3287         | 11 |
| 7  | <b>930.3774</b>  | 465.6924        | 913.3509         | 457.1791         | 912.3669        | 456.6871         | H    | <b>1205.6022</b> | <b>603.3047</b> | 1188.5756        | 594.7914         | 1187.5916      | 594.2994         | 10 |
| 8  | 1058.4724        | 529.7398        | 1041.4458        | 521.2266         | 1040.4618       | 520.7346         | K    | <b>1068.5432</b> | <b>534.7753</b> | <b>1051.5167</b> | 526.2620         | 1050.5327      | 525.7700         | 9  |
| 9  | 1173.4993        | <b>587.2533</b> | 1156.4728        | <b>578.7400</b>  | 1155.4888       | 578.2480         | D    | <b>940.4483</b>  | 470.7278        | 923.4217         | 462.2145         | 922.4377       | <b>461.7225</b>  | 8  |
| 10 | <b>1288.5263</b> | <b>644.7668</b> | <b>1271.4997</b> | 636.2535         | 1270.5157       | 635.7615         | D    | <b>825.4213</b>  | 413.2143        | 808.3948         | <b>404.7010</b>  | 807.4108       | 404.2090         | 7  |
| 11 | <b>1402.5692</b> | <b>701.7882</b> | <b>1385.5427</b> | <b>693.2750</b>  | 1384.5586       | <b>692.7830</b>  | N    | <b>710.3944</b>  | 355.7008        | <b>693.3678</b>  | 347.1876         |                |                  | 6  |
| 12 | <b>1499.6220</b> | 750.3146        | <b>1482.5954</b> | 741.8013         | 1481.6114       | 741.3093         | P    | <b>596.3515</b>  | <b>298.6794</b> | <b>579.3249</b>  | 290.1661         |                |                  | 5  |
| 13 | 1613.6649        | 807.3361        | <b>1596.6383</b> | <b>798.8228</b>  | 1595.6543       | <b>798.3308</b>  | N    | <b>499.2987</b>  | 250.1530        | 482.2722         | 241.6397         |                |                  | 4  |
| 14 | 1726.7490        | 863.8781        | 1709.7224        | 855.3648         | 1708.7384       | 854.8728         | L    | <b>385.2558</b>  | 193.1315        | 368.2292         | 184.6183         |                |                  | 3  |
| 15 | 1823.8017        | 912.4045        | 1806.7752        | 903.8912         | 1805.7912       | 903.3992         | P    | <b>272.1717</b>  | 136.5895        | 255.1452         | 128.0762         |                |                  | 2  |
| 16 |                  |                 |                  |                  |                 |                  | R    | 175.1190         | 88.0631         | 158.0924         | 79.5498          |                |                  | 1  |

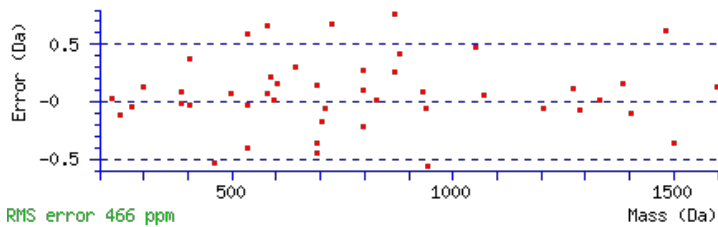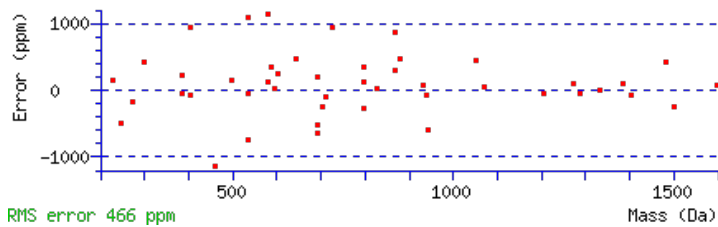

NCBI **BLAST** search of [NECFLQHKDDNPNLPR](#)

(Parameters: blastp, nr protein database, expect=20000, no filter, PAM30)

Other BLAST [web gateways](#)

**All matches to this query**

| Score | Mr(calc)  | Delta  | Sequence                          | Site Analysis        |
|-------|-----------|--------|-----------------------------------|----------------------|
| 40.0  | 1996.9061 | 0.0058 | <a href="#">NECFLQHKDDNPNLPR</a>  | Deamidated N1 87.35% |
| 31.3  | 1996.9061 | 0.0058 | <a href="#">NECFLQHKDDNPNLPR</a>  | Deamidated Q6 11.70% |
| 19.5  | 1996.9061 | 0.0058 | <a href="#">NECFLQHKDDNPNLPR</a>  | Deamidated N11 0.77% |
| 12.8  | 1996.9061 | 0.0058 | <a href="#">NECFLQHKDDNPNLPR</a>  | Deamidated N13 0.17% |
| 3.8   | 1994.9098 | 2.0022 | <a href="#">TAGFCGNPSEHLYWPNK</a> |                      |

**Mascot:** <http://www.matrixscience.com/>

# MATRIX SCIENCE Mascot Search Results

## Peptide View

MS/MS Fragmentation of **ALPQPQNVTSLLGCTH**

Found in **P02790** in **con\_Xuniprot\_HUMAN3**, HEMO\_HUMAN Hemopexin OS=Homo sapiens GN=HPX PE=1 SV=2

Match to Query 8841: 1735.857968 from(868.936260,2+) intensity(7247075.0000) rtinseconds(1820) scans(4627) index(22651)

Title: 111019\_Est\_MI\_YS\_G\_03Spectrum4043\_scans\_4627

Data file C:\\mascot\\20140703\_Tmgf\_1D\\CSV\_UseAnalysis\\MasterCSV\\All\_Glyco\\mgf\\ptm\\UC18ERLIC\_PTM\_35D.mgf

Click mouse within plot area to zoom in by factor of two about that point

Or, to Da

Label all possible matches Label matches used for scoring

Show Y-axis

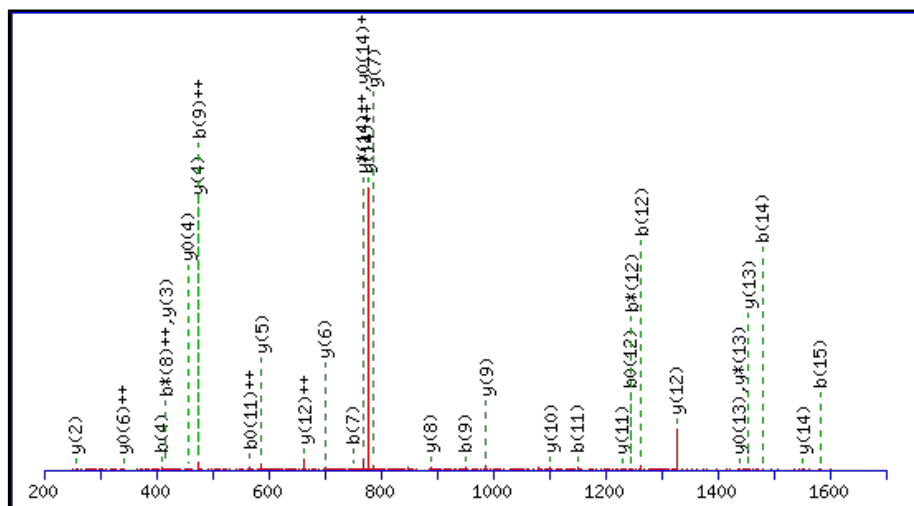

Monoisotopic mass of neutral peptide Mr(calc): 1735.8563

Fixed modifications: Carbamidomethyl (C) (apply to specified residues or termini only)

Variable modifications:

N7 : Deamidated (NQ)

Ions Score: 104 Expect: 9.1e-009

Matches : 33/138 fragment ions using 42 most intense peaks ([help](#))

| #  | b         | b <sup>++</sup> | b*        | b <sup>***</sup> | b <sup>0</sup> | b <sup>0++</sup> | Seq. | y         | y <sup>++</sup> | y*        | y <sup>***</sup> | y <sup>0</sup> | y <sup>0++</sup> | #  |
|----|-----------|-----------------|-----------|------------------|----------------|------------------|------|-----------|-----------------|-----------|------------------|----------------|------------------|----|
| 1  | 72.0444   | 36.5258         |           |                  |                |                  | A    |           |                 |           |                  |                |                  | 16 |
| 2  | 185.1285  | 93.0679         |           |                  |                |                  | L    | 1665.8265 | 833.4169        | 1648.7999 | 824.9036         | 1647.8159      | 824.4116         | 15 |
| 3  | 282.1812  | 141.5942        |           |                  |                |                  | P    | 1552.7424 | 776.8748        | 1535.7159 | 768.3616         | 1534.7319      | 767.8696         | 14 |
| 4  | 410.2398  | 205.6235        | 393.2132  | 197.1103         |                |                  | Q    | 1455.6897 | 728.3485        | 1438.6631 | 719.8352         | 1437.6791      | 719.3432         | 13 |
| 5  | 507.2926  | 254.1499        | 490.2660  | 245.6366         |                |                  | P    | 1327.6311 | 664.3192        | 1310.6045 | 655.8059         | 1309.6205      | 655.3139         | 12 |
| 6  | 635.3511  | 318.1792        | 618.3246  | 309.6659         |                |                  | Q    | 1230.5783 | 615.7928        | 1213.5518 | 607.2795         | 1212.5677      | 606.7875         | 11 |
| 7  | 750.3781  | 375.6927        | 733.3515  | 367.1794         |                |                  | N    | 1102.5197 | 551.7635        | 1085.4932 | 543.2502         | 1084.5092      | 542.7582         | 10 |
| 8  | 849.4465  | 425.2269        | 832.4199  | 416.7136         |                |                  | V    | 987.4928  | 494.2500        |           |                  | 969.4822       | 485.2448         | 9  |
| 9  | 950.4942  | 475.7507        | 933.4676  | 467.2375         | 932.4836       | 466.7454         | T    | 888.4244  | 444.7158        |           |                  | 870.4138       | 435.7105         | 8  |
| 10 | 1037.5262 | 519.2667        | 1020.4997 | 510.7535         | 1019.5156      | 510.2615         | S    | 787.3767  | 394.1920        |           |                  | 769.3661       | 385.1867         | 7  |
| 11 | 1150.6103 | 575.8088        | 1133.5837 | 567.2955         | 1132.5997      | 566.8035         | L    | 700.3447  | 350.6760        |           |                  | 682.3341       | 341.6707         | 6  |
| 12 | 1263.6943 | 632.3508        | 1246.6678 | 623.8375         | 1245.6838      | 623.3455         | L    | 587.2606  | 294.1339        |           |                  | 569.2500       | 285.1287         | 5  |
| 13 | 1320.7158 | 660.8615        | 1303.6892 | 652.3483         | 1302.7052      | 651.8563         | G    | 474.1765  | 237.5919        |           |                  | 456.1660       | 228.5866         | 4  |
| 14 | 1480.7464 | 740.8769        | 1463.7199 | 732.3636         | 1462.7359      | 731.8716         | C    | 417.1551  | 209.0812        |           |                  | 399.1445       | 200.0759         | 3  |
| 15 | 1581.7941 | 791.4007        | 1564.7676 | 782.8874         | 1563.7836      | 782.3954         | T    | 257.1244  | 129.0659        |           |                  | 239.1139       | 120.0606         | 2  |
| 16 |           |                 |           |                  |                |                  | H    | 156.0768  | 78.5420         |           |                  |                |                  | 1  |

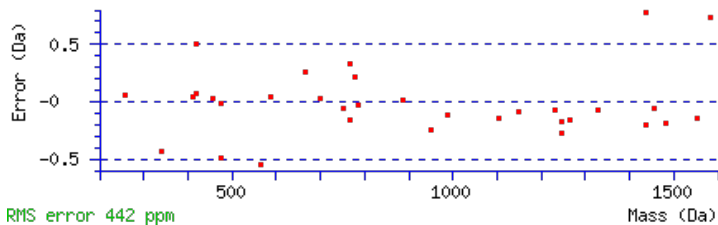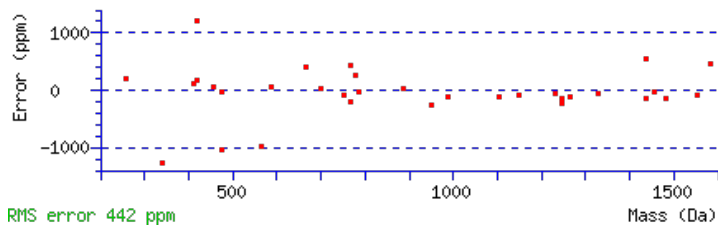

NCBI **BLAST** search of [ALPQPQNVTSLLGCTH](#)

(Parameters: blastp, nr protein database, expect=20000, no filter, PAM30)

Other BLAST [web gateways](#)

**All matches to this query**

| Score | Mr(calc)  | Delta   | Sequence                           | Site Analysis        |
|-------|-----------|---------|------------------------------------|----------------------|
| 104.3 | 1735.8563 | 0.0016  | <a href="#">ALPQPQNVTSLLGCTH</a>   | Deamidated N7 96.69% |
| 89.7  | 1735.8563 | 0.0016  | <a href="#">ALPQPQNVTSLLGCTH</a>   | Deamidated Q6 3.31%  |
| 61.5  | 1735.8563 | 0.0016  | <a href="#">ALPQPQNVTSLLGCTH</a>   | Deamidated Q4 0.01%  |
| 7.6   | 1735.8602 | -0.0022 | <a href="#">DSPRHALTSPSLGGQGR</a>  |                      |
| 7.6   | 1735.8601 | -0.0022 | <a href="#">NSPRHALTSPSLGGQGR</a>  |                      |
| 6.1   | 1735.8549 | 0.0030  | <a href="#">ILLMDNNKLNSLDSK</a>    |                      |
| 3.5   | 1733.8505 | 2.0074  | <a href="#">VEDNEALITKMELGR</a>    |                      |
| 3.3   | 1733.8559 | 2.0020  | <a href="#">TCWDADPLKRPTEK</a>     |                      |
| 3.2   | 1733.8544 | 2.0036  | <a href="#">SGGNSSSSLGDIVPSSRK</a> |                      |
| 3.1   | 1733.8552 | 2.0028  | <a href="#">NKNMKPEERANIMK</a>     |                      |

Mascot: <http://www.matrixscience.com/>

# MATRIX SCIENCE Mascot Search Results

## Peptide View

MS/MS Fragmentation of **ALPQPQNVTSLLGCTH**

Found in **P02790** in **con\_Xuniprot\_HUMAN3**, HEMO\_HUMAN Hemopexin OS=Homo sapiens GN=HPX PE=1 SV=2

Match to Query 9263: 1736.842348 from(869.428450,2+) intensity(2626051.0000) rtinseconds(1883) scans(4676) index(12720)

Title: 111019\_Est\_ISCardio\_NMI\_YS\_G\_9Spectrum4088\_scans\_\_4676

Data file C:\\mascot\\20140703\_Tmgf\_1D\\CSV\_UseAnalysis\\MasterCSV\\All\_Glyco\\mgf\\ptm\\UC18ERLIC\_PTM\_35D.mgf

Click mouse within plot area to zoom in by factor of two about that point

Or, to Da

Label all possible matches Label matches used for scoring

Show Y-axis

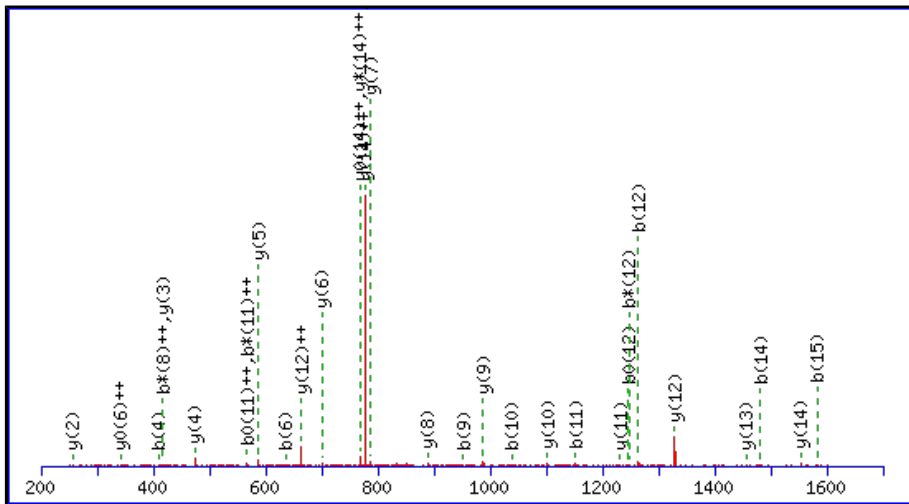

Monoisotopic mass of neutral peptide Mr(calc): 1736.8403

Fixed modifications: Carbamidomethyl (C) (apply to specified residues or termini only)

Variable modifications:

Q6 : Deamidated (NQ)

N7 : Deamidated (NQ)

Ions Score: 87 Expect: 4.4e-007

Matches : 32/138 fragment ions using 56 most intense peaks ([help](#))

| #  | b                | b <sup>++</sup> | b*               | b <sup>*++</sup> | b <sup>0</sup>   | b <sup>0++</sup> | Seq. | y                | y <sup>++</sup> | y*        | y <sup>*++</sup> | y <sup>0</sup>  | y <sup>0++</sup> | #  |
|----|------------------|-----------------|------------------|------------------|------------------|------------------|------|------------------|-----------------|-----------|------------------|-----------------|------------------|----|
| 1  | 72.0444          | 36.5258         |                  |                  |                  |                  | A    |                  |                 |           |                  |                 |                  | 16 |
| 2  | 185.1285         | 93.0679         |                  |                  |                  |                  | L    | 1666.8105        | 833.9089        | 1649.7840 | 825.3956         | 1648.7999       | 824.9036         | 15 |
| 3  | 282.1812         | 141.5942        |                  |                  |                  |                  | P    | <b>1553.7264</b> | <b>777.3669</b> | 1536.6999 | <b>768.8536</b>  | 1535.7159       | <b>768.3616</b>  | 14 |
| 4  | <b>410.2398</b>  | 205.6235        | 393.2132         | 197.1103         |                  |                  | Q    | <b>1456.6737</b> | 728.8405        | 1439.6471 | 720.3272         | 1438.6631       | 719.8352         | 13 |
| 5  | 507.2926         | 254.1499        | 490.2660         | 245.6366         |                  |                  | P    | <b>1328.6151</b> | <b>664.8112</b> | 1311.5885 | 656.2979         | 1310.6045       | 655.8059         | 12 |
| 6  | <b>636.3352</b>  | 318.6712        | 619.3086         | 310.1579         |                  |                  | Q    | <b>1231.5623</b> | 616.2848        | 1214.5358 | 607.7715         | 1213.5518       | 607.2795         | 11 |
| 7  | 751.3621         | 376.1847        | 734.3355         | 367.6714         |                  |                  | N    | <b>1102.5197</b> | 551.7635        | 1085.4932 | 543.2502         | 1084.5092       | 542.7582         | 10 |
| 8  | 850.4305         | 425.7189        | 833.4040         | <b>417.2056</b>  |                  |                  | V    | <b>987.4928</b>  | 494.2500        |           |                  | 969.4822        | 485.2448         | 9  |
| 9  | <b>951.4782</b>  | 476.2427        | 934.4516         | 467.7295         | 933.4676         | 467.2375         | T    | <b>888.4244</b>  | 444.7158        |           |                  | 870.4138        | 435.7105         | 8  |
| 10 | <b>1038.5102</b> | 519.7587        | 1021.4837        | 511.2455         | 1020.4997        | 510.7535         | S    | <b>787.3767</b>  | 394.1920        |           |                  | <b>769.3661</b> | 385.1867         | 7  |
| 11 | <b>1151.5943</b> | 576.3008        | 1134.5677        | <b>567.7875</b>  | 1133.5837        | <b>567.2955</b>  | L    | <b>700.3447</b>  | 350.6760        |           |                  | 682.3341        | <b>341.6707</b>  | 6  |
| 12 | <b>1264.6783</b> | 632.8428        | <b>1247.6518</b> | 624.3295         | <b>1246.6678</b> | 623.8375         | L    | <b>587.2606</b>  | 294.1339        |           |                  | 569.2500        | 285.1287         | 5  |
| 13 | 1321.6998        | 661.3535        | 1304.6733        | 652.8403         | 1303.6892        | 652.3483         | G    | <b>474.1765</b>  | 237.5919        |           |                  | 456.1660        | 228.5866         | 4  |
| 14 | <b>1481.7305</b> | 741.3689        | 1464.7039        | 732.8556         | 1463.7199        | 732.3636         | C    | <b>417.1551</b>  | 209.0812        |           |                  | 399.1445        | 200.0759         | 3  |
| 15 | <b>1582.7781</b> | 791.8927        | 1565.7516        | 783.3794         | 1564.7676        | 782.8874         | T    | <b>257.1244</b>  | 129.0659        |           |                  | 239.1139        | 120.0606         | 2  |
| 16 |                  |                 |                  |                  |                  |                  | H    | 156.0768         | 78.5420         |           |                  |                 |                  | 1  |

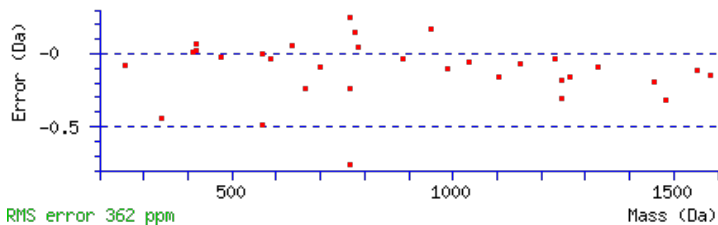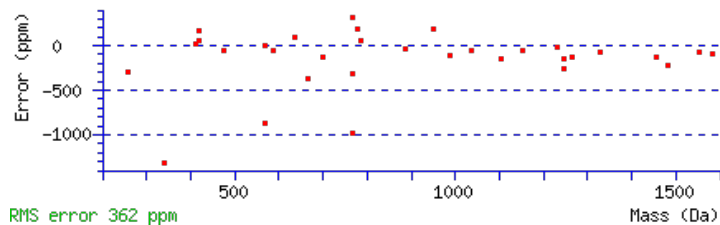

NCBI BLAST search of [ALPQPQNVTSLGCTH](#)

(Parameters: blastp, nr protein database, expect=20000, no filter, PAM30)

Other BLAST [web gateways](#)

All matches to this query

| Score | Mr(calc)  | Delta   | Sequence                        | Site Analysis            |
|-------|-----------|---------|---------------------------------|--------------------------|
| 87.1  | 1736.8403 | 0.0020  | <a href="#">ALPQPQNVTSLGCTH</a> | Deamidated Q6, N7 70.04% |
| 83.2  | 1736.8403 | 0.0020  | <a href="#">ALPQPQNVTSLGCTH</a> | Deamidated Q4, N7 28.53% |
| 70.2  | 1736.8403 | 0.0020  | <a href="#">ALPQPQNVTSLGCTH</a> | Deamidated Q4, Q6 1.42%  |
| 6.9   | 1735.8386 | 1.0038  | <a href="#">SPQPCSLGKFNCK</a>   |                          |
| 6.1   | 1736.8477 | -0.0054 | <a href="#">MGPNCISLIPIYQK</a>  |                          |
| 5.7   | 1735.8307 | 1.0117  | <a href="#">KMCDEIIEQVACIK</a>  |                          |
| 3.4   | 1734.8359 | 2.0065  | <a href="#">YQDLLDVMNPKNNR</a>  |                          |
| 3.0   | 1736.8403 | 0.0020  | <a href="#">QDCSQLVERINVEK</a>  |                          |
| 3.0   | 1735.8450 | 0.9973  | <a href="#">FIKDCIVQLNNNVR</a>  |                          |
| 2.9   | 1736.8457 | -0.0033 | <a href="#">GKALMYRLHHYSDF</a>  |                          |

Mascot: <http://www.matrixscience.com/>



# MATRIX SCIENCE Mascot Search Results

## Peptide View

MS/MS Fragmentation of **ALPQPQNVTSLLGCTH**

Found in **P02790** in **con\_Xuniprot\_HUMAN3**, HEMO\_HUMAN Hemopexin OS=Homo sapiens GN=HPX PE=1 SV=2

Match to Query 9322: 1736.844948 from(869.429750,2+) intensity(1026361.3750) rtinseconds(1878) scans(4804) index(1399)

Title: 111019\_Est\_ISCardio\_NMI\_YP\_G\_3Spectrum4190\_scans\_\_4804

Data file C:\\mascot\\20140703\_Tmgf\_1D\\CSV\_UseAnalysis\\MasterCSV\\All\_Glyco\\mgf\\ptm\\UC18ERLIC\_PTM\_35D.mgf

Click mouse within plot area to zoom in by factor of two about that point

Or, to Da

Label all possible matches Label matches used for scoring

Show Y-axis

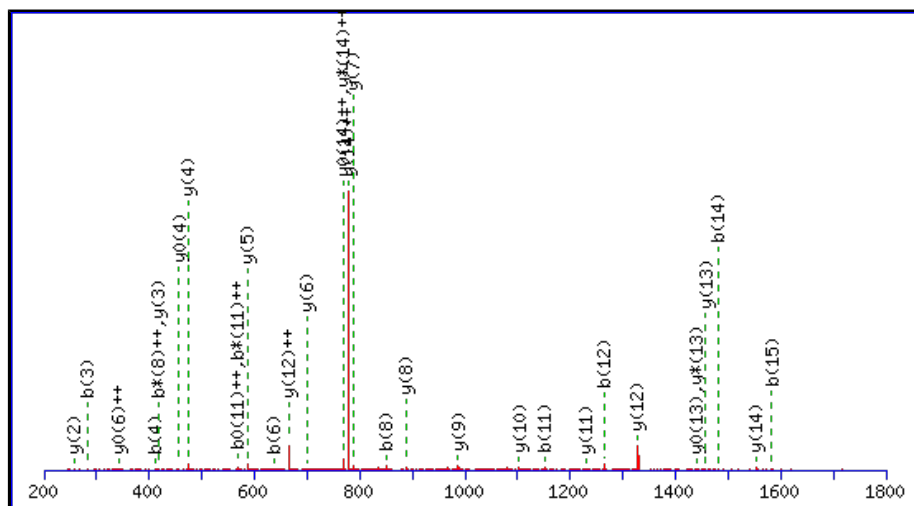

Monoisotopic mass of neutral peptide Mr(calc): 1736.8403

Fixed modifications: Carbamidomethyl (C) (apply to specified residues or termini only)

Variable modifications:

Q4 : Deamidated (NQ)

N7 : Deamidated (NQ)

Ions Score: 86 Expect: 6.4e-007

Matches : 33/138 fragment ions using 57 most intense peaks ([help](#))

| #  | b                | b <sup>++</sup> | b*        | b <sup>*++</sup> | b <sup>0</sup> | b <sup>0++</sup> | Seq. | y                | y <sup>++</sup> | y*               | y <sup>*++</sup> | y <sup>0</sup>   | y <sup>0++</sup> | #  |
|----|------------------|-----------------|-----------|------------------|----------------|------------------|------|------------------|-----------------|------------------|------------------|------------------|------------------|----|
| 1  | 72.0444          | 36.5258         |           |                  |                |                  | A    |                  |                 |                  |                  |                  |                  | 16 |
| 2  | 185.1285         | 93.0679         |           |                  |                |                  | L    | 1666.8105        | 833.9089        | 1649.7840        | 825.3956         | 1648.7999        | 824.9036         | 15 |
| 3  | <b>282.1812</b>  | 141.5942        |           |                  |                |                  | P    | <b>1553.7264</b> | <b>777.3669</b> | 1536.6999        | <b>768.8536</b>  | 1535.7159        | <b>768.3616</b>  | 14 |
| 4  | <b>411.2238</b>  | 206.1155        | 394.1973  | 197.6023         |                |                  | Q    | <b>1456.6737</b> | 728.8405        | <b>1439.6471</b> | 720.3272         | <b>1438.6631</b> | 719.8352         | 13 |
| 5  | 508.2766         | 254.6419        | 491.2500  | 246.1287         |                |                  | P    | <b>1327.6311</b> | <b>664.3192</b> | 1310.6045        | 655.8059         | 1309.6205        | 655.3139         | 12 |
| 6  | <b>636.3352</b>  | 318.6712        | 619.3086  | 310.1579         |                |                  | Q    | <b>1230.5783</b> | 615.7928        | 1213.5518        | 607.2795         | 1212.5677        | 606.7875         | 11 |
| 7  | 751.3621         | 376.1847        | 734.3355  | 367.6714         |                |                  | N    | <b>1102.5197</b> | 551.7635        | 1085.4932        | 543.2502         | 1084.5092        | 542.7582         | 10 |
| 8  | <b>850.4305</b>  | 425.7189        | 833.4040  | <b>417.2056</b>  |                |                  | V    | <b>987.4928</b>  | 494.2500        |                  |                  | 969.4822         | 485.2448         | 9  |
| 9  | 951.4782         | 476.2427        | 934.4516  | 467.7295         | 933.4676       | 467.2375         | T    | <b>888.4244</b>  | 444.7158        |                  |                  | 870.4138         | 435.7105         | 8  |
| 10 | 1038.5102        | 519.7587        | 1021.4837 | 511.2455         | 1020.4997      | 510.7535         | S    | <b>787.3767</b>  | 394.1920        |                  |                  | <b>769.3661</b>  | 385.1867         | 7  |
| 11 | <b>1151.5943</b> | 576.3008        | 1134.5677 | <b>567.7875</b>  | 1133.5837      | <b>567.2955</b>  | L    | <b>700.3447</b>  | 350.6760        |                  |                  | 682.3341         | <b>341.6707</b>  | 6  |
| 12 | <b>1264.6783</b> | 632.8428        | 1247.6518 | 624.3295         | 1246.6678      | 623.8375         | L    | <b>587.2606</b>  | 294.1339        |                  |                  | 569.2500         | 285.1287         | 5  |
| 13 | 1321.6998        | 661.3535        | 1304.6733 | 652.8403         | 1303.6892      | 652.3483         | G    | <b>474.1765</b>  | 237.5919        |                  |                  | <b>456.1660</b>  | 228.5866         | 4  |
| 14 | <b>1481.7305</b> | 741.3689        | 1464.7039 | 732.8556         | 1463.7199      | 732.3636         | C    | <b>417.1551</b>  | 209.0812        |                  |                  | 399.1445         | 200.0759         | 3  |
| 15 | <b>1582.7781</b> | 791.8927        | 1565.7516 | 783.3794         | 1564.7676      | 782.8874         | T    | <b>257.1244</b>  | 129.0659        |                  |                  | 239.1139         | 120.0606         | 2  |
| 16 |                  |                 |           |                  |                |                  | H    | 156.0768         | 78.5420         |                  |                  |                  |                  | 1  |

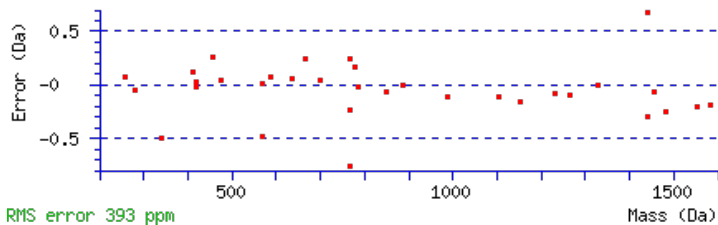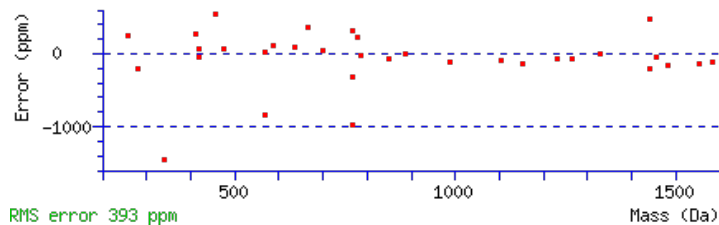

NCBI **BLAST** search of [ALPQPQNVTSLLGCTH](#)

(Parameters: blastp, nr protein database, expect=20000, no filter, PAM30)

Other BLAST [web gateways](#)

**All matches to this query**

| Score | Mr(calc)  | Delta   | Sequence                          | Site Analysis            |
|-------|-----------|---------|-----------------------------------|--------------------------|
| 85.7  | 1736.8403 | 0.0046  | <a href="#">ALPQPQNVTSLLGCTH</a>  | Deamidated Q4, N7 83.32% |
| 77.8  | 1736.8403 | 0.0046  | <a href="#">ALPQPQNVTSLLGCTH</a>  | Deamidated Q6, N7 13.57% |
| 71.4  | 1736.8403 | 0.0046  | <a href="#">ALPQPQNVTSLLGCTH</a>  | Deamidated Q4, Q6 3.11%  |
| 5.4   | 1736.8482 | -0.0032 | <a href="#">NAEEFTLRFGVDRPS</a>   |                          |
| 5.3   | 1736.8477 | -0.0028 | <a href="#">MGPNCISLIPIYQK</a>    |                          |
| 4.2   | 1735.8386 | 1.0064  | <a href="#">SPQPCSLLGTKENCK</a>   |                          |
| 3.8   | 1735.8464 | 0.9985  | <a href="#">AIWGTKCSKWAESGR</a>   |                          |
| 3.8   | 1736.8369 | 0.0080  | <a href="#">ANQPLGAPPPQPQTYR</a>  |                          |
| 3.5   | 1734.8464 | 1.9985  | <a href="#">YEEALDILQWGQLR</a>    |                          |
| 3.2   | 1734.8384 | 2.0065  | <a href="#">SGGNSSSLGDIVPSSRK</a> |                          |

Mascot: <http://www.matrixscience.com/>

# MATRIX SCIENCE Mascot Search Results

## Peptide View

MS/MS Fragmentation of **SWPAVGNCSSALR**

Found in **P02790** in **con\_Xuniprot\_HUMAN3**, HEMO\_HUMAN Hemopexin OS=Homo sapiens GN=HPX PE=1 SV=2

Match to Query 2463: 1404.646728 from(703.330640,2+) intensity(7324408.5000) rtinseconds(1073) scans(2478) index(10855)

Title: 111019\_Est\_ISCardio\_NMI\_YS\_G\_7Spectrum2085\_scans\_\_2478

Data file C:\\mascot\\20140703\_Tmgf\_1D\\CSV\_UseAnalysis\\MasterCSV\\All\_Glyco\\mgf\\ptm\\UC18ERLIC\_PTM\_35D.mgf

Click mouse within plot area to zoom in by factor of two about that point

Or, to Da

Label all possible matches Label matches used for scoring

Show Y-axis

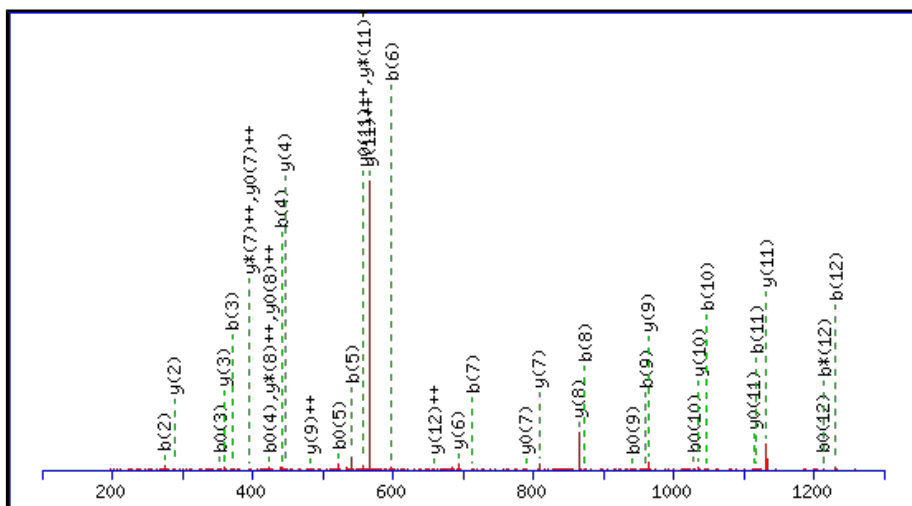

Monoisotopic mass of neutral peptide Mr(calc): 1404.6456

Fixed modifications: Carbamidomethyl (C) (apply to specified residues or termini only)

Variable modifications:

N7 : Deamidated (NQ)

Ions Score: 85 Expect: 4.4e-007

Matches : 38/126 fragment ions using 55 most intense peaks ([help](#))

| #  | b                | b <sup>++</sup> | b <sup>*</sup>   | b <sup>*++</sup> | b <sup>0</sup>   | b <sup>0++</sup> | Seq. | y                | y <sup>++</sup> | y <sup>*</sup> | y <sup>*++</sup> | y <sup>0</sup>   | y <sup>0++</sup> | #  |
|----|------------------|-----------------|------------------|------------------|------------------|------------------|------|------------------|-----------------|----------------|------------------|------------------|------------------|----|
| 1  | 88.0393          | 44.5233         |                  |                  | 70.0287          | 35.5180          | S    |                  |                 |                |                  |                  |                  | 13 |
| 2  | <b>274.1186</b>  | 137.5629        |                  |                  | 256.1081         | 128.5577         | W    | 1318.6208        | <b>659.8141</b> | 1301.5943      | 651.3008         | 1300.6103        | 650.8088         | 12 |
| 3  | <b>371.1714</b>  | 186.0893        |                  |                  | <b>353.1608</b>  | 177.0840         | P    | <b>1132.5415</b> | <b>566.7744</b> | 1115.5150      | <b>558.2611</b>  | <b>1114.5310</b> | <b>557.7691</b>  | 11 |
| 4  | <b>442.2085</b>  | 221.6079        |                  |                  | <b>424.1979</b>  | 212.6026         | A    | <b>1035.4888</b> | 518.2480        | 1018.4622      | 509.7347         | 1017.4782        | 509.2427         | 10 |
| 5  | <b>541.2769</b>  | 271.1421        |                  |                  | <b>523.2663</b>  | 262.1368         | V    | <b>964.4517</b>  | <b>482.7295</b> | 947.4251       | 474.2162         | 946.4411         | 473.7242         | 9  |
| 6  | <b>598.2984</b>  | 299.6528        |                  |                  | 580.2878         | 290.6475         | G    | <b>865.3832</b>  | 433.1953        | 848.3567       | <b>424.6820</b>  | 847.3727         | <b>424.1900</b>  | 8  |
| 7  | <b>713.3253</b>  | 357.1663        | 696.2988         | 348.6530         | 695.3148         | 348.1610         | N    | <b>808.3618</b>  | 404.6845        | 791.3352       | <b>396.1713</b>  | <b>790.3512</b>  | <b>395.6792</b>  | 7  |
| 8  | <b>873.3560</b>  | 437.1816        | 856.3294         | 428.6683         | 855.3454         | 428.1763         | C    | <b>693.3348</b>  | 347.1711        | 676.3083       | 338.6578         | 675.3243         | 338.1658         | 6  |
| 9  | <b>960.3880</b>  | 480.6976        | 943.3614         | 472.1844         | <b>942.3774</b>  | 471.6924         | S    | 533.3042         | 267.1557        | 516.2776       | 258.6425         | 515.2936         | 258.1504         | 5  |
| 10 | <b>1047.4200</b> | 524.2136        | 1030.3935        | 515.7004         | <b>1029.4095</b> | 515.2084         | S    | <b>446.2722</b>  | 223.6397        | 429.2456       | 215.1264         | 428.2616         | 214.6344         | 4  |
| 11 | <b>1118.4571</b> | 559.7322        | 1101.4306        | 551.2189         | 1100.4466        | 550.7269         | A    | <b>359.2401</b>  | 180.1237        | 342.2136       | 171.6104         |                  |                  | 3  |
| 12 | <b>1231.5412</b> | 616.2742        | <b>1214.5147</b> | 607.7610         | <b>1213.5306</b> | 607.2690         | L    | <b>288.2030</b>  | 144.6051        | 271.1765       | 136.0919         |                  |                  | 2  |
| 13 |                  |                 |                  |                  |                  |                  | R    | 175.1190         | 88.0631         | 158.0924       | 79.5498          |                  |                  | 1  |

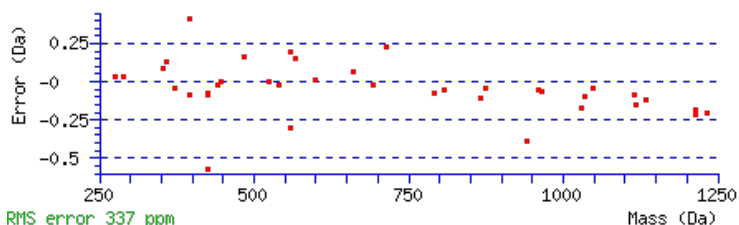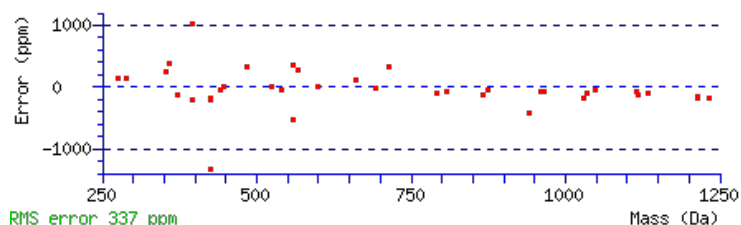

NCBI **BLAST** search of [SWPAVGNCSSALR](#)

(Parameters: blastp, nr protein database, expect=20000, no filter, PAM30)

Other BLAST [web gateways](#)

**All matches to this query**

| Score | Mr(calc)  | Delta   | Sequence                       |
|-------|-----------|---------|--------------------------------|
| 85.0  | 1404.6456 | 0.0011  | <a href="#">SWPAVGNCSSALR</a>  |
| 13.3  | 1403.6470 | 0.9998  | <a href="#">WQYSGQLHEVR</a>    |
| 11.5  | 1403.6503 | 0.9964  | <a href="#">CLDLSFLNHER</a>    |
| 11.4  | 1404.6534 | -0.0067 | <a href="#">DASPHAAYFDRR</a>   |
| 10.5  | 1403.6398 | 1.0069  | <a href="#">RDAPVCCDRQK</a>    |
| 9.7   | 1402.6333 | 2.0134  | <a href="#">VTAGNLHCQMVR</a>   |
| 9.7   | 1404.6416 | 0.0052  | <a href="#">NGAQSCGGLERVR</a>  |
| 9.3   | 1404.6456 | 0.0011  | <a href="#">GCALOYQHATVR</a>   |
| 7.7   | 1404.6496 | -0.0029 | <a href="#">GVMDWDWLEVR</a>    |
| 7.4   | 1404.6490 | -0.0022 | <a href="#">MAAVEACGGSPVTR</a> |

Mascot: <http://www.matrixscience.com/>

# MASCOT SCIENCE Mascot Search Results

## Peptide View

MS/MS Fragmentation of **ERSWPAVGNCSSALR**

Found in **P02790** in **con\_Xuniprot\_HUMAN3**, HEMO\_HUMAN Hemopexin OS=Homo sapiens GN=HPX PE=1 SV=2

Match to Query 8690: 1689.795928 from(845.905240,2+) intensity(43656.9023) rtinseconds(724) scans(1678) index(24391)

Title: 111019\_Est\_MI\_YS\_G\_06Spectrum1445\_scans\_\_1678

Data file C:\\mascot\\20140703\_Tmgf\_1D\\CSV\_UseAnalysis\\MasterCSV\\All\_Glyco\\mgf\\ptm\\UC18ERLIC\_PTM\_35D.mgf

Click mouse within plot area to zoom in by factor of two about that point

Or, to Da

Label all possible matches Label matches used for scoring

Show Y-axis

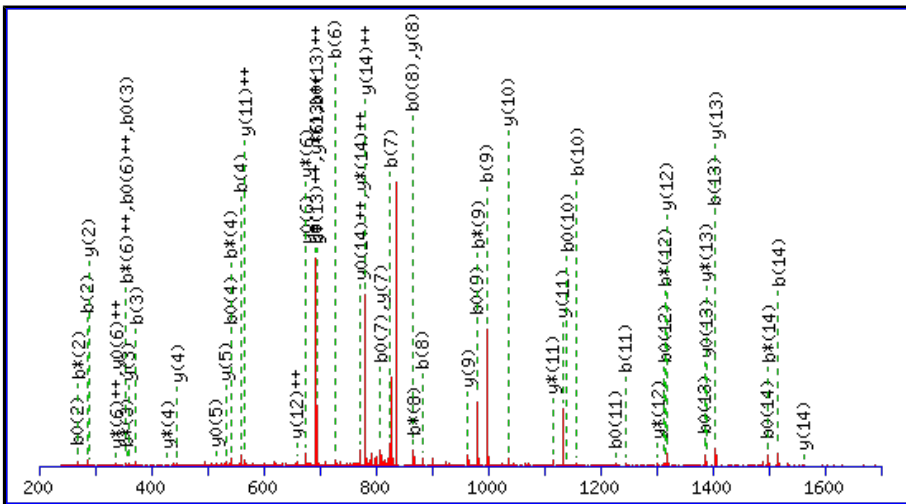

Monoisotopic mass of neutral peptide Mr(calc): 1689.7893

Fixed modifications: Carbamidomethyl (C) (apply to specified residues or termini only)

Variable modifications:

N9 : Deamidated (NQ)

Ions Score: 79 Expect: 2.1e-006

Matches : 63/160 fragment ions using 99 most intense peaks ([help](#))

| #  | b                | b <sup>++</sup> | b <sup>*</sup>   | b <sup>*++</sup> | b <sup>0</sup>   | b <sup>0++</sup> | Seq. | y                | y <sup>++</sup> | y <sup>*</sup>   | y <sup>*++</sup> | y <sup>0</sup>   | y <sup>0++</sup> | #  |
|----|------------------|-----------------|------------------|------------------|------------------|------------------|------|------------------|-----------------|------------------|------------------|------------------|------------------|----|
| 1  | 130.0499         | 65.5286         |                  |                  | 112.0393         | 56.5233          | E    |                  |                 |                  |                  |                  |                  | 15 |
| 2  | <b>286.1510</b>  | 143.5791        | <b>269.1244</b>  | 135.0659         | <b>268.1404</b>  | 134.5738         | R    | <b>1561.7540</b> | <b>781.3806</b> | 1544.7274        | <b>772.8674</b>  | 1543.7434        | <b>772.3753</b>  | 14 |
| 3  | <b>373.1830</b>  | 187.0951        | <b>356.1565</b>  | 178.5819         | <b>355.1724</b>  | 178.0899         | S    | <b>1405.6529</b> | 703.3301        | <b>1388.6263</b> | <b>694.8168</b>  | <b>1387.6423</b> | <b>694.3248</b>  | 13 |
| 4  | <b>559.2623</b>  | 280.1348        | <b>542.2358</b>  | 271.6215         | <b>541.2518</b>  | 271.1295         | W    | <b>1318.6208</b> | <b>659.8141</b> | <b>1301.5943</b> | 651.3008         | 1300.6103        | 650.8088         | 12 |
| 5  | 656.3151         | 328.6612        | 639.2885         | 320.1479         | 638.3045         | 319.6559         | P    | <b>1132.5415</b> | <b>566.7744</b> | <b>1115.5150</b> | 558.2611         | 1114.5310        | 557.7691         | 11 |
| 6  | <b>727.3522</b>  | 364.1797        | 710.3257         | <b>355.6665</b>  | 709.3416         | <b>355.1745</b>  | A    | <b>1035.4888</b> | 518.2480        | 1018.4622        | 509.7347         | 1017.4782        | 509.2427         | 10 |
| 7  | <b>826.4206</b>  | 413.7139        | 809.3941         | 405.2007         | <b>808.4100</b>  | 404.7087         | V    | <b>964.4517</b>  | 482.7295        | 947.4251         | 474.2162         | 946.4411         | 473.7242         | 9  |
| 8  | <b>883.4421</b>  | 442.2247        | <b>866.4155</b>  | 433.7114         | <b>865.4315</b>  | 433.2194         | G    | <b>865.3832</b>  | 433.1953        | 848.3567         | 424.6820         | 847.3727         | 424.1900         | 8  |
| 9  | <b>998.4690</b>  | 499.7381        | <b>981.4425</b>  | 491.2249         | <b>980.4585</b>  | 490.7329         | N    | <b>808.3618</b>  | 404.6845        | 791.3352         | 396.1713         | 790.3512         | 395.6792         | 7  |
| 10 | <b>1158.4997</b> | 579.7535        | 1141.4731        | 571.2402         | <b>1140.4891</b> | 570.7482         | C    | <b>693.3348</b>  | 347.1711        | <b>676.3083</b>  | <b>338.6578</b>  | <b>675.3243</b>  | <b>338.1658</b>  | 6  |
| 11 | <b>1245.5317</b> | 623.2695        | 1228.5051        | 614.7562         | <b>1227.5211</b> | 614.2642         | S    | <b>533.3042</b>  | 267.1557        | 516.2776         | 258.6425         | <b>515.2936</b>  | 258.1504         | 5  |
| 12 | 1332.5637        | 666.7855        | <b>1315.5372</b> | 658.2722         | <b>1314.5532</b> | 657.7802         | S    | <b>446.2722</b>  | 223.6397        | <b>429.2456</b>  | 215.1264         | 428.2616         | 214.6344         | 4  |
| 13 | <b>1403.6008</b> | 702.3041        | 1386.5743        | <b>693.7908</b>  | <b>1385.5903</b> | <b>693.2988</b>  | A    | <b>359.2401</b>  | 180.1237        | 342.2136         | 171.6104         |                  |                  | 3  |
| 14 | <b>1516.6849</b> | 758.8461        | <b>1499.6584</b> | 750.3328         | <b>1498.6743</b> | 749.8408         | L    | <b>288.2030</b>  | 144.6051        | 271.1765         | 136.0919         |                  |                  | 2  |
| 15 |                  |                 |                  |                  |                  |                  | R    | 175.1190         | 88.0631         | 158.0924         | 79.5498          |                  |                  | 1  |

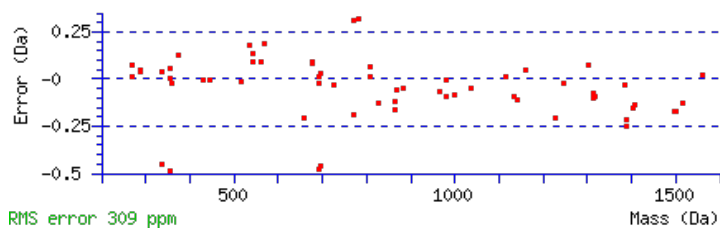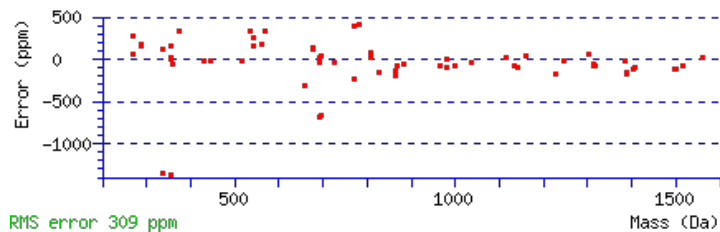

NCBI BLAST search of [ERSWPAVGNCSSALR](#)

(Parameters: blastp, nr protein database, expect=20000, no filter, PAM30)

Other BLAST [web gateways](#)

**All matches to this query**

| Score | Mr(calc)  | Delta   | Sequence                         |
|-------|-----------|---------|----------------------------------|
| 79.5  | 1689.7893 | 0.0067  | <a href="#">ERSWPAVGNCSSALR</a>  |
| 12.7  | 1689.7958 | 0.0001  | <a href="#">VOGSAISHYADSVQAR</a> |
| 5.6   | 1689.8039 | -0.0080 | <a href="#">GSVGRVSQC�LCPTR</a>  |
| 5.1   | 1688.7927 | 1.0032  | <a href="#">TVSSEDVAEMHNILK</a>  |
| 4.9   | 1689.8032 | -0.0072 | <a href="#">SESEFMQKYEQKIR</a>   |
| 4.1   | 1687.7909 | 2.0050  | <a href="#">MLASTLNIAQSAVMR</a>  |
| 3.4   | 1687.7909 | 2.0050  | <a href="#">MLASTLNIAQSAVMR</a>  |
| 2.4   | 1689.7992 | -0.0033 | <a href="#">CVIEGNLGSDKDQVR</a>  |
| 2.4   | 1689.7992 | -0.0033 | <a href="#">CVIEGNLGSDKDQVR</a>  |
| 2.2   | 1688.7853 | 1.0107  | <a href="#">SSEPSEELQELRER</a>   |

Mascot: <http://www.matrixscience.com/>

# MASCOT SCIENCE Mascot Search Results

## Peptide View

MS/MS Fragmentation of **ALPQPQNVTSLLGCTH**

Found in **P02790** in **con\_Xuniprot\_HUMAN3**, HEMO\_HUMAN Hemopexin OS=Homo sapiens GN=HPX PE=1 SV=2

Match to Query 9357: 1737.825528 from(869.920040,2+) intensity(26586.1719) rtinseconds(1952) scans(4872) index(12741)

Title: 111019\_Est\_ISCardio\_NMI\_YS\_G\_9Spectrum4260\_scans\_\_4872

Data file C:\\mascot\\20140703\_Tmgf\_1D\\CSV\_UseAnalysis\\MasterCSV\\All\_Glyco\\mgf\\ptm\\UC18ERLIC\_PTM\_35D.mgf

Click mouse within plot area to zoom in by factor of two about that point

Or, to Da

Label all possible matches      Label matches used for scoring

Show Y-axis

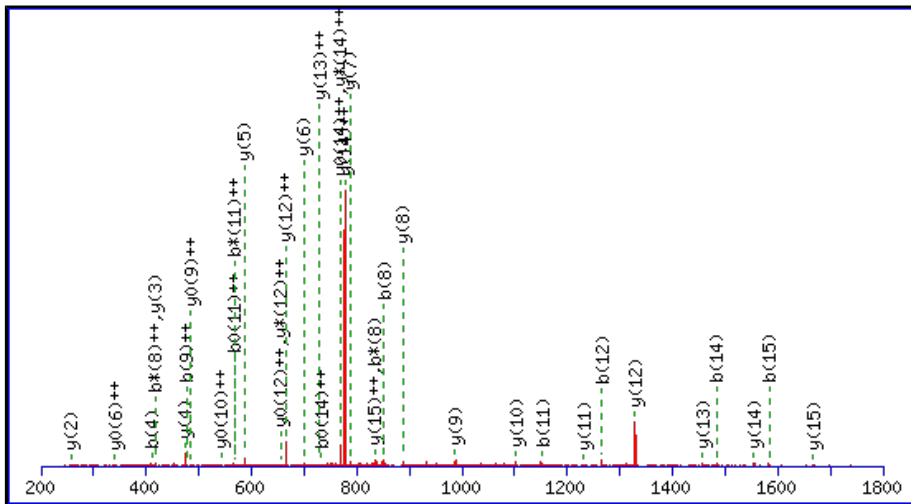

Monoisotopic mass of neutral peptide Mr(calc): 1737.8243

Fixed modifications: Carbamidomethyl (C) (apply to specified residues or termini only)

Variable modifications:

Q4 : Deamidated (NQ)

Q6 : Deamidated (NQ)

N7 : Deamidated (NQ)

Ions Score: 71      Expect: 1.8e-005

Matches : 38/138 fragment ions using 103 most intense peaks ([help](#))

| #  | b         | b <sup>++</sup> | b <sup>*</sup> | b <sup>*++</sup> | b <sup>0</sup> | b <sup>0++</sup> | Seq. | y         | y <sup>++</sup> | y <sup>*</sup> | y <sup>*++</sup> | y <sup>0</sup> | y <sup>0++</sup> | #  |
|----|-----------|-----------------|----------------|------------------|----------------|------------------|------|-----------|-----------------|----------------|------------------|----------------|------------------|----|
| 1  | 72.0444   | 36.5258         |                |                  |                |                  | A    |           |                 |                |                  |                |                  | 16 |
| 2  | 185.1285  | 93.0679         |                |                  |                |                  | L    | 1667.7945 | 834.4009        | 1650.7680      | 825.8876         | 1649.7840      | 825.3956         | 15 |
| 3  | 282.1812  | 141.5942        |                |                  |                |                  | P    | 1554.7105 | 777.8589        | 1537.6839      | 769.3456         | 1536.6999      | 768.8536         | 14 |
| 4  | 411.2238  | 206.1155        | 394.1973       | 197.6023         |                |                  | Q    | 1457.6577 | 729.3325        | 1440.6311      | 720.8192         | 1439.6471      | 720.3272         | 13 |
| 5  | 508.2766  | 254.6419        | 491.2500       | 246.1287         |                |                  | P    | 1328.6151 | 664.8112        | 1311.5885      | 656.2979         | 1310.6045      | 655.8059         | 12 |
| 6  | 637.3192  | 319.1632        | 620.2926       | 310.6499         |                |                  | Q    | 1231.5623 | 616.2848        | 1214.5358      | 607.7715         | 1213.5518      | 607.2795         | 11 |
| 7  | 752.3461  | 376.6767        | 735.3196       | 368.1634         |                |                  | N    | 1102.5197 | 551.7635        | 1085.4932      | 543.2502         | 1084.5092      | 542.7582         | 10 |
| 8  | 851.4145  | 426.2109        | 834.3880       | 417.6976         |                |                  | V    | 987.4928  | 494.2500        |                |                  | 969.4822       | 485.2448         | 9  |
| 9  | 952.4622  | 476.7347        | 935.4357       | 468.2215         | 934.4516       | 467.7295         | T    | 888.4244  | 444.7158        |                |                  | 870.4138       | 435.7105         | 8  |
| 10 | 1039.4942 | 520.2508        | 1022.4677      | 511.7375         | 1021.4837      | 511.2455         | S    | 787.3767  | 394.1920        |                |                  | 769.3661       | 385.1867         | 7  |
| 11 | 1152.5783 | 576.7928        | 1135.5517      | 568.2795         | 1134.5677      | 567.7875         | L    | 700.3447  | 350.6760        |                |                  | 682.3341       | 341.6707         | 6  |
| 12 | 1265.6624 | 633.3348        | 1248.6358      | 624.8215         | 1247.6518      | 624.3295         | L    | 587.2606  | 294.1339        |                |                  | 569.2500       | 285.1287         | 5  |
| 13 | 1322.6838 | 661.8456        | 1305.6573      | 653.3323         | 1304.6733      | 652.8403         | G    | 474.1765  | 237.5919        |                |                  | 456.1660       | 228.5866         | 4  |
| 14 | 1482.7145 | 741.8609        | 1465.6879      | 733.3476         | 1464.7039      | 732.8556         | C    | 417.1551  | 209.0812        |                |                  | 399.1445       | 200.0759         | 3  |
| 15 | 1583.7622 | 792.3847        | 1566.7356      | 783.8714         | 1565.7516      | 783.3794         | T    | 257.1244  | 129.0659        |                |                  | 239.1139       | 120.0606         | 2  |
| 16 |           |                 |                |                  |                |                  | H    | 156.0768  | 78.5420         |                |                  |                |                  | 1  |



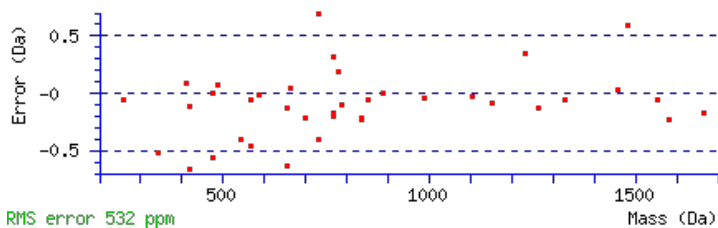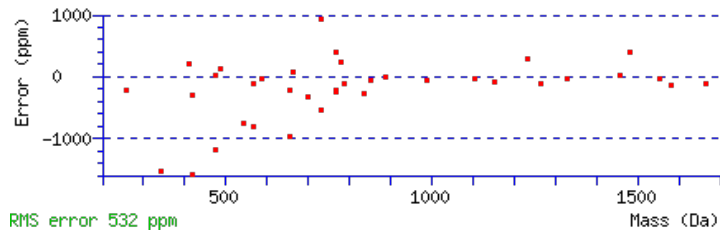

NCBI **BLAST** search of [ALPQPQNVTSLGCTH](#)

(Parameters: blastp, nr protein database, expect=20000, no filter, PAM30)

Other BLAST [web gateways](#)

**All matches to this query**

| Score | Mr(calc)  | Delta   | Sequence                         |
|-------|-----------|---------|----------------------------------|
| 70.6  | 1737.8243 | 0.0012  | <a href="#">ALPQPQNVTSLGCTH</a>  |
| 3.3   | 1737.8277 | -0.0021 | <a href="#">MQMLKLDKENAIDR</a>   |
| 3.3   | 1737.8277 | -0.0021 | <a href="#">MQMLKLDKENALDR</a>   |
| 3.0   | 1737.8209 | 0.0046  | <a href="#">ANQPLGAPPPQPQTYR</a> |
| 2.9   | 1737.8317 | -0.0062 | <a href="#">ALIVQDSPCFQSMK</a>   |
| 2.8   | 1737.8317 | -0.0062 | <a href="#">MGPNCISLIPIYQK</a>   |
| 2.2   | 1737.8282 | -0.0027 | <a href="#">APDGPTGPTAEEDLGR</a> |
| 2.1   | 1736.8192 | 1.0064  | <a href="#">GQVYSELKYHPEMR</a>   |
| 2.1   | 1737.8243 | 0.0012  | <a href="#">ALEEFAEMKEREK</a>    |
| 0.6   | 1735.8212 | 2.0043  | <a href="#">YVRRYMQEGQPHR</a>    |

Mascot: <http://www.matrixscience.com/>

# MATRIX SCIENCE Mascot Search Results

## Peptide View

MS/MS Fragmentation of **NGTGHG NSTHHGPEYMR**

Found in **P02790** in **con\_Xuniprot\_HUMAN3**, HEMO\_HUMAN Hemopexin OS=Homo sapiens GN=HPX PE=1 SV=2

Match to Query 10960: 1852.759782 from(618.593870,3+) intensity(14343.3838) rtinseconds(167) scans(198) index(23014)

Title: 111019\_Est\_MI\_YS\_G\_04Spectrum133\_scans\_\_198

Data file C:\\mascot\\20140703\_Tmgf\_1D\\CSV\_UseAnalysis\\MasterCSV\\All\_Glyco\\mgf\\ptm\\UC18ERLIC\_PTM\_35D.mgf

Click mouse within plot area to zoom in by factor of two about that point

Or, to Da

Label all possible matches Label matches used for scoring

Show Y-axis

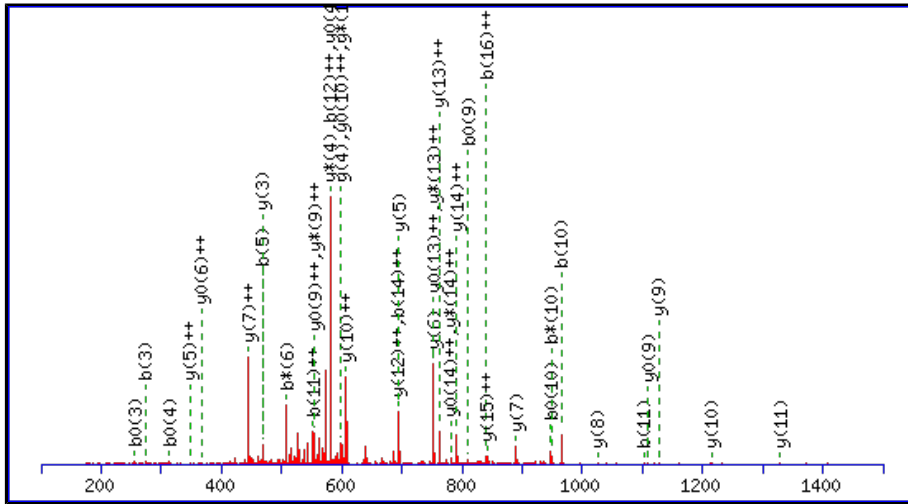

Monoisotopic mass of neutral peptide Mr(calc): 1852.7547

Fixed modifications: Carbamidomethyl (C) (apply to specified residues or termini only)

Variable modifications:

N1 : Deamidated (NQ)

N7 : Deamidated (NQ)

Ions Score: 57 Expect: 6.5e-005

Matches : 42/182 fragment ions using 65 most intense peaks ([help](#))

| #  | b                | b <sup>++</sup> | b*              | b <sup>*++</sup> | b <sup>0</sup>  | b <sup>0++</sup> | Seq. | y                | y <sup>++</sup> | y*              | y <sup>*++</sup> | y <sup>0</sup>   | y <sup>0++</sup> | #  |
|----|------------------|-----------------|-----------------|------------------|-----------------|------------------|------|------------------|-----------------|-----------------|------------------|------------------|------------------|----|
| 1  | 116.0342         | 58.5207         | 99.0077         | 50.0075          |                 |                  | N    |                  |                 |                 |                  |                  |                  | 17 |
| 2  | 173.0557         | 87.0315         | 156.0291        | 78.5182          |                 |                  | G    | 1738.7350        | 869.8712        | 1721.7085       | 861.3579         | 1720.7245        | 860.8659         | 16 |
| 3  | <b>274.1034</b>  | 137.5553        | 257.0768        | 129.0420         | <b>256.0928</b> | 128.5500         | T    | 1681.7136        | <b>841.3604</b> | 1664.6870       | 832.8472         | 1663.7030        | 832.3551         | 15 |
| 4  | 331.1248         | 166.0661        | 314.0983        | 157.5528         | <b>313.1143</b> | 157.0608         | G    | 1580.6659        | <b>790.8366</b> | 1563.6394       | <b>782.3233</b>  | 1562.6553        | <b>781.8313</b>  | 14 |
| 5  | <b>468.1837</b>  | 234.5955        | 451.1572        | 226.0822         | 450.1732        | 225.5902         | H    | 1523.6444        | <b>762.3259</b> | 1506.6179       | <b>753.8126</b>  | 1505.6339        | <b>753.3206</b>  | 13 |
| 6  | 525.2052         | 263.1062        | <b>508.1787</b> | 254.5930         | 507.1946        | 254.1010         | G    | 1386.5855        | <b>693.7964</b> | 1369.5590       | 685.2831         | 1368.5750        | 684.7911         | 12 |
| 7  | 640.2321         | 320.6197        | 623.2056        | 312.1064         | 622.2216        | 311.6144         | N    | <b>1329.5641</b> | 665.2857        | 1312.5375       | 656.7724         | 1311.5535        | 656.2804         | 11 |
| 8  | 727.2642         | 364.1357        | 710.2376        | 355.6225         | 709.2536        | 355.1304         | S    | <b>1214.5371</b> | <b>607.7722</b> | 1197.5106       | <b>599.2589</b>  | 1196.5266        | <b>598.7669</b>  | 10 |
| 9  | 828.3119         | 414.6596        | 811.2853        | 406.1463         | <b>810.3013</b> | 405.6543         | T    | <b>1127.5051</b> | 564.2562        | 1110.4785       | <b>555.7429</b>  | <b>1109.4945</b> | <b>555.2509</b>  | 9  |
| 10 | <b>965.3708</b>  | 483.1890        | <b>948.3442</b> | 474.6757         | <b>947.3602</b> | 474.1837         | H    | <b>1026.4574</b> | 513.7323        | 1009.4309       | 505.2191         | 1008.4468        | 504.7271         | 8  |
| 11 | <b>1102.4297</b> | <b>551.7185</b> | 1085.4031       | 543.2052         | 1084.4191       | 542.7132         | H    | <b>889.3985</b>  | <b>445.2029</b> | 872.3720        | 436.6896         | 871.3879         | 436.1976         | 7  |
| 12 | 1159.4511        | <b>580.2292</b> | 1142.4246       | 571.7159         | 1141.4406       | 571.2239         | G    | <b>752.3396</b>  | 376.6734        | 735.3130        | 368.1602         | 734.3290         | <b>367.6681</b>  | 6  |
| 13 | 1256.5039        | 628.7556        | 1239.4774       | 620.2423         | 1238.4933       | 619.7503         | P    | <b>695.3181</b>  | <b>348.1627</b> | 678.2916        | 339.6494         | 677.3076         | 339.1574         | 5  |
| 14 | 1385.5465        | <b>693.2769</b> | 1368.5199       | 684.7636         | 1367.5359       | 684.2716         | E    | <b>598.2654</b>  | 299.6363        | <b>581.2388</b> | 291.1230         | <b>580.2548</b>  | 290.6310         | 4  |
| 15 | 1548.6098        | 774.8086        | 1531.5833       | 766.2953         | 1530.5993       | 765.8033         | Y    | <b>469.2228</b>  | 235.1150        | 452.1962        | 226.6017         |                  |                  | 3  |
| 16 | 1679.6503        | <b>840.3288</b> | 1662.6238       | 831.8155         | 1661.6397       | 831.3235         | M    | 306.1594         | 153.5834        | 289.1329        | 145.0701         |                  |                  | 2  |
| 17 |                  |                 |                 |                  |                 |                  | R    | 175.1190         | 88.0631         | 158.0924        | 79.5498          |                  |                  | 1  |

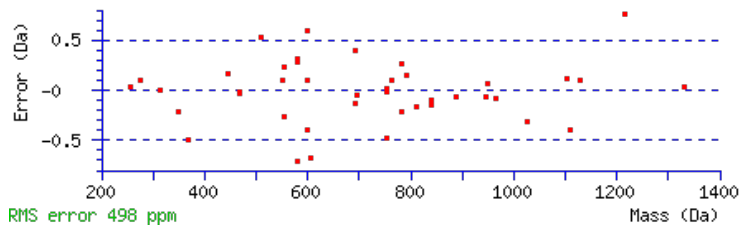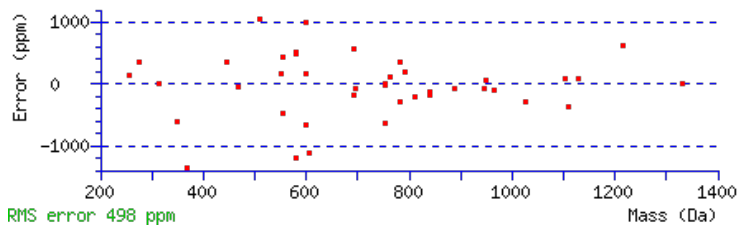

NCBI **BLAST** search of [NGTGHGNSTHHGPEYMR](#)

(Parameters: blastp, nr protein database, expect=20000, no filter, PAM30)

Other BLAST [web gateways](#)

**All matches to this query**

| Score | Mr(calc)  | Delta   | Sequence                          |
|-------|-----------|---------|-----------------------------------|
| 56.8  | 1852.7547 | 0.0051  | <a href="#">NGTGHGNSTHHGPEYMR</a> |
| 5.3   | 1852.7608 | -0.0010 | <a href="#">QYKDMMSEGGPPGAEPQ</a> |
| 4.7   | 1850.7597 | 2.0001  | <a href="#">CSTCGKCFESQSSSLNK</a> |
| 0.8   | 1850.7485 | 2.0113  | <a href="#">EGVMNTGVCTYMGADSK</a> |
| 0.4   | 1850.7597 | 2.0001  | <a href="#">CSTCGKCFESQSSSLNK</a> |

**Mascot:** <http://www.matrixscience.com/>

# MASCOT SCIENCE Mascot Search Results

## Peptide View

MS/MS Fragmentation of **NGTGHGNSTHHGPEYMR**

Found in **P02790** in **con\_Xuniprot\_HUMAN3**, HEMO\_HUMAN Hemopexin OS=Homo sapiens GN=HPX PE=1 SV=2

Match to Query 11004: 1868.753136 from(468.195560,4+) intensity(10256.5479) rtinseconds(152) scans(132) index(10731)

Title: 111019\_Est\_ISCardio\_NMI\_YS\_G\_7Spectrum71\_scans\_\_132

Data file C:\\mascot\\20140703\_Tmgf\_1D\\CSV\_UseAnalysis\\MasterCSV\\All\_Glyco\\mgf\\ptm\\UC18ERLIC\_PTM\_35D.mgf

Click mouse within plot area to zoom in by factor of two about that point

Or, to Da

Label all possible matches Label matches used for scoring

Show Y-axis

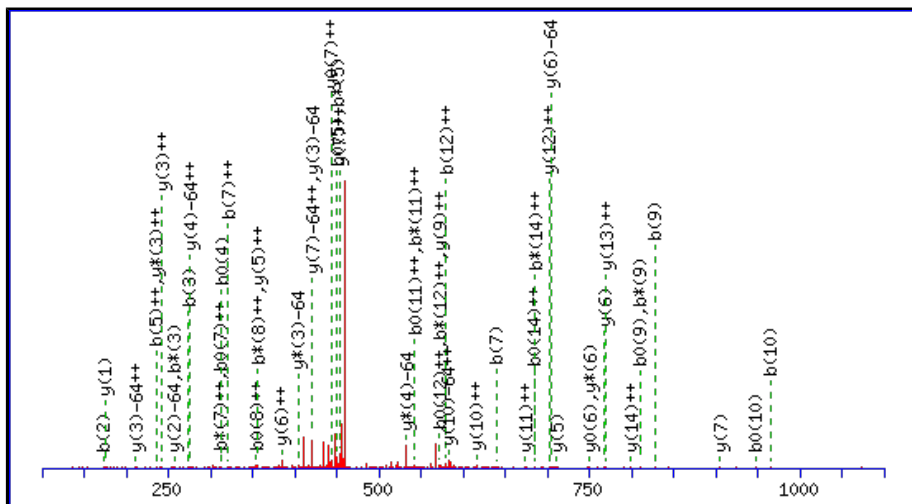

**Monoisotopic mass of neutral peptide Mr(calc):** 1868.7496

**Fixed modifications:** Carbamidomethyl (C) (apply to specified residues or termini only)

**Variable modifications:**

**N1** : Deamidated (NQ)

**N7** : Deamidated (NQ)

**M16** : Oxidation (M), with neutral losses 0.0000 (shown in table), 63.9983

**Ions Score:** 41 **Expect:** 0.0015

**Matches** : 52/274 fragment ions using 76 most intense peaks ([help](#))

| #  | b               | b <sup>++</sup> | b <sup>*</sup>  | b <sup>*++</sup> | b <sup>0</sup>  | b <sup>0++</sup> | Seq. | y               | y <sup>++</sup> | y <sup>*</sup>  | y <sup>*++</sup> | y <sup>0</sup>  | y <sup>0++</sup> | #  |
|----|-----------------|-----------------|-----------------|------------------|-----------------|------------------|------|-----------------|-----------------|-----------------|------------------|-----------------|------------------|----|
| 1  | 116.0342        | 58.5207         | 99.0077         | 50.0075          |                 |                  | N    |                 |                 |                 |                  |                 |                  | 17 |
| 2  | <b>173.0557</b> | 87.0315         | 156.0291        | 78.5182          |                 |                  | G    | 1754.7300       | 877.8686        | 1737.7034       | 869.3553         | 1736.7194       | 868.8633         | 16 |
| 3  | <b>274.1034</b> | 137.5553        | <b>257.0768</b> | 129.0420         | 256.0928        | 128.5500         | T    | 1697.7085       | 849.3579        | 1680.6819       | 840.8446         | 1679.6979       | 840.3526         | 15 |
| 4  | 331.1248        | 166.0661        | 314.0983        | 157.5528         | <b>313.1143</b> | 157.0608         | G    | 1596.6608       | <b>798.8340</b> | 1579.6343       | 790.3208         | 1578.6503       | 789.8288         | 14 |
| 5  | 468.1837        | <b>234.5955</b> | <b>451.1572</b> | 226.0822         | <b>450.1732</b> | 225.5902         | H    | 1539.6394       | <b>770.3233</b> | 1522.6128       | 761.8100         | 1521.6288       | 761.3180         | 13 |
| 6  | 525.2052        | 263.1062        | 508.1787        | 254.5930         | 507.1946        | 254.1010         | G    | 1402.5804       | <b>701.7939</b> | 1385.5539       | 693.2806         | 1384.5699       | 692.7886         | 12 |
| 7  | <b>640.2321</b> | <b>320.6197</b> | 623.2056        | <b>312.1064</b>  | 622.2216        | <b>311.6144</b>  | N    | 1345.5590       | <b>673.2831</b> | 1328.5324       | 664.7699         | 1327.5484       | 664.2778         | 11 |
| 8  | 727.2642        | 364.1357        | 710.2376        | <b>355.6225</b>  | 709.2536        | <b>355.1304</b>  | S    | 1230.5320       | <b>615.7697</b> | 1213.5055       | 607.2564         | 1212.5215       | 606.7644         | 10 |
| 9  | <b>828.3119</b> | 414.6596        | <b>811.2853</b> | 406.1463         | <b>810.3013</b> | 405.6543         | T    | 1143.5000       | <b>572.2536</b> | 1126.4735       | 563.7404         | 1125.4894       | 563.2484         | 9  |
| 10 | <b>965.3708</b> | 483.1890        | 948.3442        | 474.6757         | <b>947.3602</b> | 474.1837         | H    | 1042.4523       | 521.7298        | 1025.4258       | 513.2165         | 1024.4418       | 512.7245         | 8  |
| 11 | 1102.4297       | 551.7185        | 1085.4031       | <b>543.2052</b>  | 1084.4191       | <b>542.7132</b>  | H    | <b>905.3934</b> | <b>453.2003</b> | 888.3669        | 444.6871         | 887.3828        | <b>444.1951</b>  | 7  |
| 12 | 1159.4511       | <b>580.2292</b> | 1142.4246       | <b>571.7159</b>  | 1141.4406       | <b>571.2239</b>  | G    | <b>768.3345</b> | <b>384.6709</b> | <b>751.3080</b> | 376.1576         | <b>750.3239</b> | 375.6656         | 6  |
| 13 | 1256.5039       | 628.7556        | 1239.4774       | 620.2423         | 1238.4933       | 619.7503         | P    | <b>711.3130</b> | <b>356.1602</b> | 694.2865        | 347.6469         | 693.3025        | 347.1549         | 5  |
| 14 | 1385.5465       | 693.2769        | 1368.5199       | <b>684.7636</b>  | 1367.5359       | <b>684.2716</b>  | E    | 614.2603        | 307.6338        | 597.2337        | 299.1205         | 596.2497        | 298.6285         | 4  |
| 15 | 1548.6098       | 774.8086        | 1531.5833       | 766.2953         | 1530.5993       | 765.8033         | Y    | 485.2177        | <b>243.1125</b> | 468.1911        | <b>234.5992</b>  |                 |                  | 3  |
| 16 | 1695.6452       | 848.3263        | 1678.6187       | 839.8130         | 1677.6347       | 839.3210         | M    | 322.1544        | 161.5808        | 305.1278        | 153.0675         |                 |                  | 2  |
| 17 |                 |                 |                 |                  |                 |                  | R    | <b>175.1190</b> | 88.0631         | 158.0924        | 79.5498          |                 |                  | 1  |

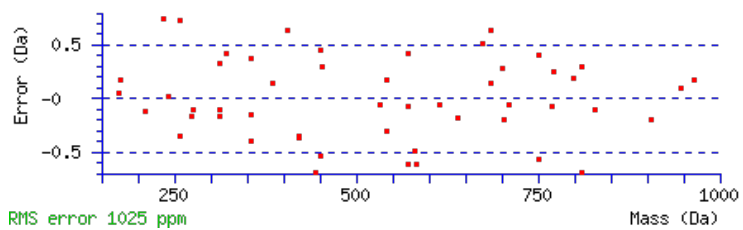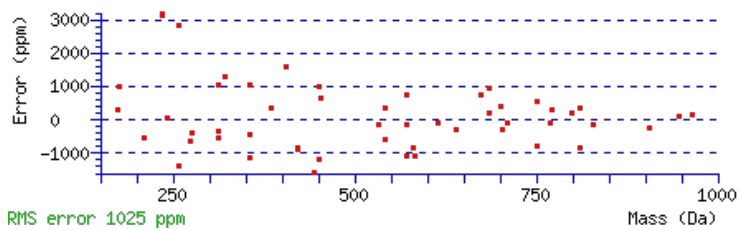

NCBI BLAST search of [NGTGHGNSSTHHGPEYMR](#)

(Parameters: blastp, nr protein database, expect=20000, no filter, PAM30)

Other BLAST [web gateways](#)

**All matches to this query**

| Score | Mr(calc)  | Delta  | Sequence                           |
|-------|-----------|--------|------------------------------------|
| 41.2  | 1868.7496 | 0.0035 | <a href="#">NGTGHGNSSTHHGPEYMR</a> |
| 9.3   | 1867.7440 | 1.0091 | <a href="#">TCPTNYMWNNHICR</a>     |
| 9.3   | 1867.7440 | 1.0091 | <a href="#">TCPTNYMWNNHICR</a>     |
| 9.3   | 1867.7440 | 1.0091 | <a href="#">TCPTNYMWNNHICR</a>     |
| 4.4   | 1866.7551 | 1.9980 | <a href="#">HGHDAAPSSGQQGCSVDR</a> |
| 3.0   | 1868.7444 | 0.0087 | <a href="#">IMEWGGMPQDQESTNK</a>   |
| 3.0   | 1868.7444 | 0.0087 | <a href="#">IMEWGGMPQDQESTNK</a>   |
| 3.0   | 1867.7440 | 1.0091 | <a href="#">CFQCHEGETHYLCK</a>     |
| 3.0   | 1868.7505 | 0.0026 | <a href="#">CRPYGHFGPSCTDCR</a>    |
| 3.0   | 1866.7481 | 2.0050 | <a href="#">CQESGQPMSCTCGPLR</a>   |

Mascot: <http://www.matrixscience.com/>

# MASCOT SCIENCE Mascot Search Results

## Peptide View

MS/MS Fragmentation of **VYSGILNQSEIK**

Found in **E9PGP2** in **con\_Xuniprot\_HUMAN3**, E9PGP2\_HUMAN Coagulation factor XI OS=Homo sapiens GN=F11 PE=2 SV=1

Match to Query 2140: 1350.708488 from(676.361520,2+) intensity(9060.8760) rtinseconds(1167) scans(2645) index(7394)

Title: 111019\_Est\_ISCardio\_NMI\_YP\_G\_11Spectrum2297\_scans\_2645

Data file C:\\mascot\\20140703\_Tmgf\_1D\\CSV\_UseAnalysis\\MasterCSV\\All\_Glyco\\mgf\\ptm\\UC18ERLIC\_PTM\_35D.mgf

Click mouse within plot area to zoom in by factor of two about that point

Or, to Da

Label all possible matches Label matches used for scoring

Show Y-axis

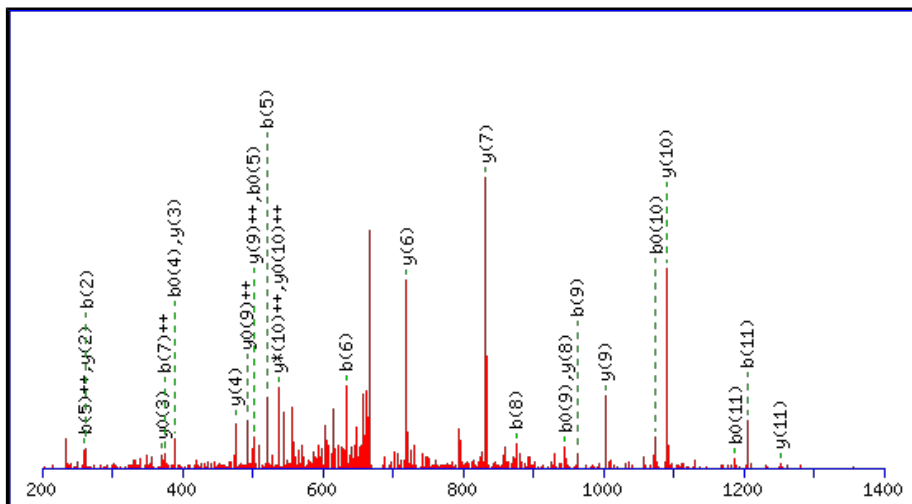

Monoisotopic mass of neutral peptide Mr(calc): 1350.7031

Fixed modifications: Carbamidomethyl (C) (apply to specified residues or termini only)

Variable modifications:

N7 : Deamidated (NQ)

Ions Score: 66 Expect: 4.6e-005

Matches : 27/112 fragment ions using 33 most intense peaks ([help](#))

| #  | b                | b <sup>++</sup> | b <sup>*</sup> | b <sup>*++</sup> | b <sup>0</sup>   | b <sup>0++</sup> | Seq. | y                | y <sup>++</sup> | y <sup>*</sup> | y <sup>*++</sup> | y <sup>0</sup>  | y <sup>0++</sup> | #  |
|----|------------------|-----------------|----------------|------------------|------------------|------------------|------|------------------|-----------------|----------------|------------------|-----------------|------------------|----|
| 1  | 100.0757         | 50.5415         |                |                  |                  |                  | V    |                  |                 |                |                  |                 |                  | 12 |
| 2  | <b>263.1390</b>  | 132.0731        |                |                  |                  |                  | Y    | <b>1252.6420</b> | 626.8246        | 1235.6154      | 618.3113         | 1234.6314       | 617.8193         | 11 |
| 3  | 350.1710         | 175.5892        |                |                  | 332.1605         | 166.5839         | S    | <b>1089.5786</b> | 545.2930        | 1072.5521      | <b>536.7797</b>  | 1071.5681       | <b>536.2877</b>  | 10 |
| 4  | 407.1925         | 204.0999        |                |                  | <b>389.1819</b>  | 195.0946         | G    | <b>1002.5466</b> | <b>501.7769</b> | 985.5201       | 493.2637         | 984.5360        | <b>492.7717</b>  | 9  |
| 5  | <b>520.2766</b>  | <b>260.6419</b> |                |                  | <b>502.2660</b>  | 251.6366         | I    | <b>945.5251</b>  | 473.2662        | 928.4986       | 464.7529         | 927.5146        | 464.2609         | 8  |
| 6  | <b>633.3606</b>  | 317.1840        |                |                  | 615.3501         | 308.1787         | L    | <b>832.4411</b>  | 416.7242        | 815.4145       | 408.2109         | 814.4305        | 407.7189         | 7  |
| 7  | 748.3876         | <b>374.6974</b> | 731.3610       | 366.1842         | 730.3770         | 365.6921         | N    | <b>719.3570</b>  | 360.1821        | 702.3305       | 351.6689         | 701.3464        | 351.1769         | 6  |
| 8  | <b>876.4462</b>  | 438.7267        | 859.4196       | 430.2134         | 858.4356         | 429.7214         | Q    | 604.3301         | 302.6687        | 587.3035       | 294.1554         | 586.3195        | 293.6634         | 5  |
| 9  | <b>963.4782</b>  | 482.2427        | 946.4516       | 473.7295         | <b>945.4676</b>  | 473.2374         | S    | <b>476.2715</b>  | 238.6394        | 459.2449       | 230.1261         | 458.2609        | 229.6341         | 4  |
| 10 | 1092.5208        | 546.7640        | 1075.4942      | 538.2508         | <b>1074.5102</b> | 537.7587         | E    | <b>389.2395</b>  | 195.1234        | 372.2129       | 186.6101         | <b>371.2289</b> | 186.1181         | 3  |
| 11 | <b>1205.6048</b> | 603.3061        | 1188.5783      | 594.7928         | <b>1187.5943</b> | 594.3008         | I    | <b>260.1969</b>  | 130.6021        | 243.1703       | 122.0888         |                 |                  | 2  |
| 12 |                  |                 |                |                  |                  |                  | K    | 147.1128         | 74.0600         | 130.0863       | 65.5468          |                 |                  | 1  |

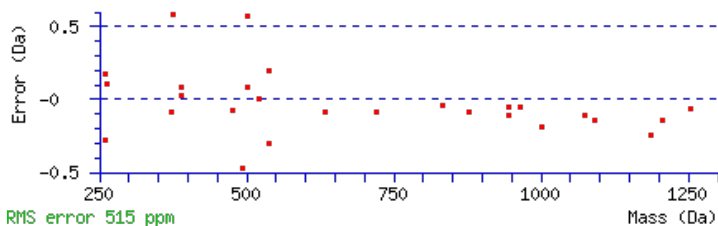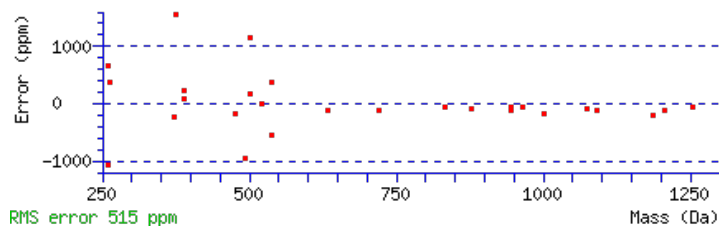

NCBI **BLAST** search of [VYSGILNQSEIK](#)

(Parameters: blastp, nr protein database, expect=20000, no filter, PAM30)

Other BLAST [web gateways](#)

**All matches to this query**

| Score | Mr(calc)  | Delta   | Sequence                     | Site Analysis        |
|-------|-----------|---------|------------------------------|----------------------|
| 66.2  | 1350.7031 | 0.0054  | <a href="#">VYSGILNQSEIK</a> | Deamidated N7 50.23% |
| 66.1  | 1350.7031 | 0.0054  | <a href="#">VYSGILNQSEIK</a> | Deamidated Q8 49.77% |
| 9.7   | 1350.7031 | 0.0054  | <a href="#">YQKAGDVSLELK</a> |                      |
| 8.4   | 1350.7031 | 0.0054  | <a href="#">VYEGAKSIEEVK</a> |                      |
| 7.3   | 1349.7078 | 1.0007  | <a href="#">ELYLAKEEDLK</a>  |                      |
| 5.5   | 1350.7030 | 0.0054  | <a href="#">KELEFSNKDQLK</a> |                      |
| 5.5   | 1350.7031 | 0.0054  | <a href="#">SFEELIQEKTG</a>  |                      |
| 5.3   | 1350.7143 | -0.0058 | <a href="#">KGFNQISTSOIK</a> |                      |
| 5.1   | 1350.7031 | 0.0054  | <a href="#">SLFSLDGKNELK</a> |                      |
| 4.6   | 1350.7031 | 0.0054  | <a href="#">SEKLSSEFSLQK</a> |                      |

**Mascot:** <http://www.matrixscience.com/>



# MASCOT SCIENCE Mascot Search Results

## Peptide View

MS/MS Fragmentation of **LETTVNYTDSQRPICLPSK**

Found in **E9PGP2** in **con\_Xumiprot\_HUMAN3**, E9PGP2\_HUMAN Coagulation factor XI OS=Homo sapiens GN=F11 PE=2 SV=1

Match to Query 14904: 2222.094788 from(1112.054670,2+) intensity(19839.8242) rtinseconds(1031) scans(2435) index(2567)

Title: 111019\_Est\_ISCardio\_NMI\_YP\_G\_5Spectrum2064\_scans\_\_2435

Data file C:\mascot\20140703\_Tmgf\_1D\CSV\_UseAnalysis\MasterCSV\All\_Glyco\mgf\ptm\UC18ERLIC\_PTM\_35D.mgf

Click mouse within plot area to zoom in by factor of two about that point

Or, to Da

Label all possible matches Label matches used for scoring

Show Y-axis

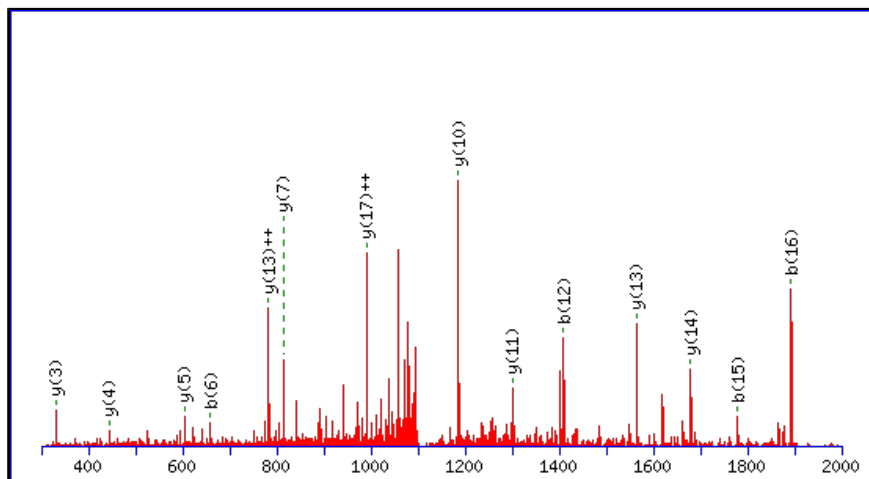

Monoisotopic mass of neutral peptide Mr(calc): 2222.0889

Fixed modifications: Carbamidomethyl (C) (apply to specified residues or termini only)

Variable modifications:

N6 : Deamidated (NQ)

Ions Score: 58 Expect: 0.00043

Matches : 14/202 fragment ions using 17 most intense peaks ([help](#))

| #  | b         | b <sup>++</sup> | b <sup>*</sup> | b <sup>*++</sup> | b <sup>0</sup> | b <sup>0++</sup> | Seq. | y         | y <sup>++</sup> | y <sup>*</sup> | y <sup>*++</sup> | y <sup>0</sup> | y <sup>0++</sup> | #  |
|----|-----------|-----------------|----------------|------------------|----------------|------------------|------|-----------|-----------------|----------------|------------------|----------------|------------------|----|
| 1  | 114.0913  | 57.5493         |                |                  |                |                  | L    |           |                 |                |                  |                |                  | 19 |
| 2  | 243.1339  | 122.0706        |                |                  | 225.1234       | 113.0653         | E    | 2110.0121 | 1055.5097       | 2092.9856      | 1046.9964        | 2092.0015      | 1046.5044        | 18 |
| 3  | 344.1816  | 172.5944        |                |                  | 326.1710       | 163.5892         | T    | 1980.9695 | 990.9884        | 1963.9430      | 982.4751         | 1962.9590      | 981.9831         | 17 |
| 4  | 445.2293  | 223.1183        |                |                  | 427.2187       | 214.1130         | T    | 1879.9218 | 940.4646        | 1862.8953      | 931.9513         | 1861.9113      | 931.4593         | 16 |
| 5  | 544.2977  | 272.6525        |                |                  | 526.2871       | 263.6472         | V    | 1778.8742 | 889.9407        | 1761.8476      | 881.4274         | 1760.8636      | 880.9354         | 15 |
| 6  | 659.3246  | 330.1660        | 642.2981       | 321.6527         | 641.3141       | 321.1607         | N    | 1679.8057 | 840.4065        | 1662.7792      | 831.8932         | 1661.7952      | 831.4012         | 14 |
| 7  | 822.3880  | 411.6976        | 805.3614       | 403.1844         | 804.3774       | 402.6923         | Y    | 1564.7788 | 782.8930        | 1547.7523      | 774.3798         | 1546.7682      | 773.8878         | 13 |
| 8  | 923.4357  | 462.2215        | 906.4091       | 453.7082         | 905.4251       | 453.2162         | T    | 1401.7155 | 701.3614        | 1384.6889      | 692.8481         | 1383.7049      | 692.3561         | 12 |
| 9  | 1038.4626 | 519.7349        | 1021.4361      | 511.2217         | 1020.4520      | 510.7297         | D    | 1300.6678 | 650.8375        | 1283.6412      | 642.3243         | 1282.6572      | 641.8323         | 11 |
| 10 | 1125.4946 | 563.2510        | 1108.4681      | 554.7377         | 1107.4841      | 554.2457         | S    | 1185.6409 | 593.3241        | 1168.6143      | 584.8108         | 1167.6303      | 584.3188         | 10 |
| 11 | 1253.5532 | 627.2802        | 1236.5267      | 618.7670         | 1235.5426      | 618.2750         | Q    | 1098.6088 | 549.8081        | 1081.5823      | 541.2948         | 1080.5983      | 540.8028         | 9  |
| 12 | 1409.6543 | 705.3308        | 1392.6278      | 696.8175         | 1391.6438      | 696.3255         | R    | 970.5502  | 485.7788        | 953.5237       | 477.2655         | 952.5397       | 476.7735         | 8  |
| 13 | 1506.7071 | 753.8572        | 1489.6805      | 745.3439         | 1488.6965      | 744.8519         | P    | 814.4491  | 407.7282        | 797.4226       | 399.2149         | 796.4386       | 398.7229         | 7  |
| 14 | 1619.7911 | 810.3992        | 1602.7646      | 801.8859         | 1601.7806      | 801.3939         | I    | 717.3964  | 359.2018        | 700.3698       | 350.6885         | 699.3858       | 350.1965         | 6  |
| 15 | 1779.8218 | 890.4145        | 1762.7952      | 881.9013         | 1761.8112      | 881.4093         | C    | 604.3123  | 302.6598        | 587.2858       | 294.1465         | 586.3017       | 293.6545         | 5  |
| 16 | 1892.9059 | 946.9566        | 1875.8793      | 938.4433         | 1874.8953      | 937.9513         | L    | 444.2817  | 222.6445        | 427.2551       | 214.1312         | 426.2711       | 213.6392         | 4  |
| 17 | 1989.9586 | 995.4829        | 1972.9321      | 986.9697         | 1971.9481      | 986.4777         | P    | 331.1976  | 166.1024        | 314.1710       | 157.5892         | 313.1870       | 157.0972         | 3  |
| 18 | 2076.9906 | 1038.9990       | 2059.9641      | 1030.4857        | 2058.9801      | 1029.9937        | S    | 234.1448  | 117.5761        | 217.1183       | 109.0628         | 216.1343       | 108.5708         | 2  |
| 19 |           |                 |                |                  |                |                  | K    | 147.1128  | 74.0600         | 130.0863       | 65.5468          |                |                  | 1  |

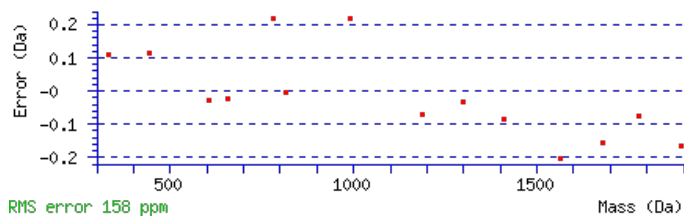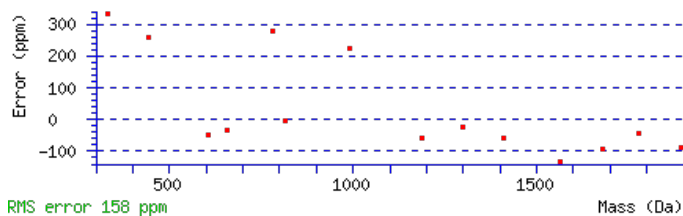

NCBI **BLAST** search of [LETTVNYTDSQRPICLPSK](#)

(Parameters: blastp, nr protein database, expect=20000, no filter, PAM30)

Other BLAST [web gateways](#)

**All matches to this query**

| Score | Mr(calc)  | Delta   | Sequence                             | Site Analysis         |
|-------|-----------|---------|--------------------------------------|-----------------------|
| 58.2  | 2222.0889 | 0.0059  | <a href="#">LETTVNYTDSQRPICLPSK</a>  | Deamidated N6 86.54%  |
| 50.1  | 2222.0889 | 0.0059  | <a href="#">LETTVNYTDSQRPICLPSK</a>  | Deamidated Q11 13.46% |
| 9.2   | 2220.0845 | 2.0103  | <a href="#">QTVLQSIDAFEQPMPTRR</a>   |                       |
| 8.8   | 2222.0954 | -0.0006 | <a href="#">LAEETLHSDPLEQOSIVSPK</a> |                       |
| 7.6   | 2221.0949 | 0.9998  | <a href="#">FLMRVEQDENELAWLRR</a>    |                       |
| 6.1   | 2222.0936 | 0.0012  | <a href="#">LEPCCQAITYLGRDTLRR</a>   |                       |
| 1.6   | 2222.0967 | -0.0019 | <a href="#">LDNDKARWEPVTSSPOLHK</a>  |                       |
| 0.9   | 2222.0981 | -0.0033 | <a href="#">HIHHNEHLENIGNAAGQAIK</a> |                       |
| 0.9   | 2220.0804 | 2.0144  | <a href="#">SIQNTLKNKTRPENMDSR</a>   |                       |

Mascot: <http://www.matrixscience.com/>

# Mascot Search Results

## Peptide View

MS/MS Fragmentation of **GINYNSSVAK**

Found in **D6RB32** in **con\_Xuniprot\_HUMAN3**, D6RB32\_HUMAN Coagulation factor XI OS=Homo sapiens GN=F11 PE=2 SV=1

Match to Query 203: 1052.516348 from(527.265450,2+) intensity(10074.6318) rtinseconds(418) scans(791) index(26411)

Title: 111019\_Est\_MI\_YS\_G\_09Spectrum652\_scans\_\_791

Data file C:\\mascot\\20140703\_Tmgf\_1D\\CSV\_UseAnalysis\\MasterCSV\\All\_Glyco\\mgf\\ptm\\UC18ERLIC\_PTM\_35D.mgf

Click mouse within plot area to zoom in by factor of two about that point

Or, to Da

Label all possible matches Label matches used for scoring

Show Y-axis

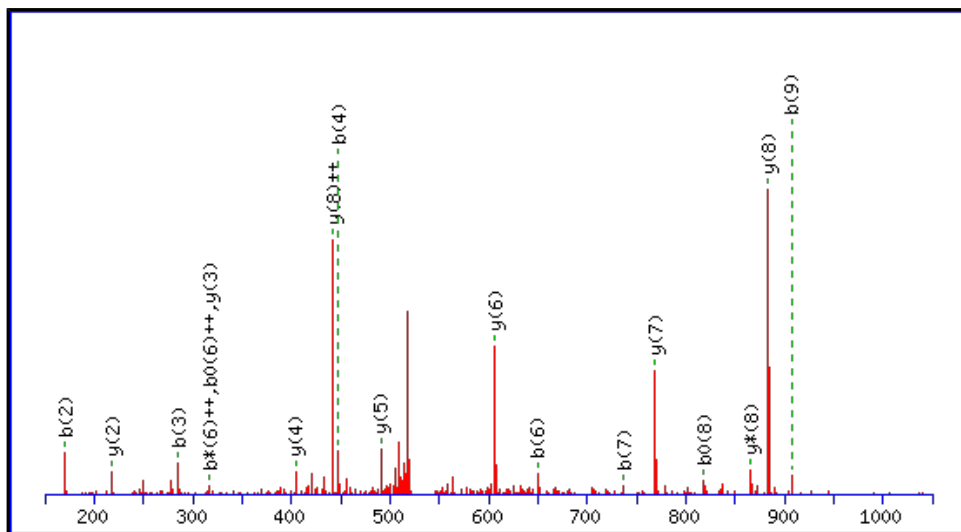

Monoisotopic mass of neutral peptide **Mr(calc):** 1052.5138

**Fixed modifications:** Carbamidomethyl (C) (apply to specified residues or termini only)

**Variable modifications:**

N5 : Deamidated (NQ)

**Ions Score:** 54 **Expect:** 0.00059

**Matches :** 18/88 fragment ions using 27 most intense peaks ([help](#))

| #  | b               | b <sup>++</sup> | b <sup>*</sup> | b <sup>*++</sup> | b <sup>0</sup>  | b <sup>0++</sup> | Seq.     | y               | y <sup>++</sup> | y <sup>*</sup>  | y <sup>*++</sup> | y <sup>0</sup> | y <sup>0++</sup> | #         |
|----|-----------------|-----------------|----------------|------------------|-----------------|------------------|----------|-----------------|-----------------|-----------------|------------------|----------------|------------------|-----------|
| 1  | 58.0287         | 29.5180         |                |                  |                 |                  | <b>G</b> |                 |                 |                 |                  |                |                  | <b>10</b> |
| 2  | <b>171.1128</b> | 86.0600         |                |                  |                 |                  | <b>I</b> | 996.4997        | 498.7535        | 979.4731        | 490.2402         | 978.4891       | 489.7482         | <b>9</b>  |
| 3  | <b>285.1557</b> | 143.0815        | 268.1292       | 134.5682         |                 |                  | <b>N</b> | <b>883.4156</b> | <b>442.2114</b> | <b>866.3890</b> | 433.6982         | 865.4050       | 433.2061         | <b>8</b>  |
| 4  | <b>448.2191</b> | 224.6132        | 431.1925       | 216.0999         |                 |                  | <b>Y</b> | <b>769.3727</b> | 385.1900        | 752.3461        | 376.6767         | 751.3621       | 376.1847         | <b>7</b>  |
| 5  | 563.2460        | 282.1266        | 546.2195       | 273.6134         |                 |                  | <b>N</b> | <b>606.3093</b> | 303.6583        | 589.2828        | 295.1450         | 588.2988       | 294.6530         | <b>6</b>  |
| 6  | <b>650.2780</b> | 325.6427        | 633.2515       | <b>317.1294</b>  | 632.2675        | <b>316.6374</b>  | <b>S</b> | <b>491.2824</b> | 246.1448        | 474.2558        | 237.6316         | 473.2718       | 237.1395         | <b>5</b>  |
| 7  | <b>737.3101</b> | 369.1587        | 720.2835       | 360.6454         | 719.2995        | 360.1534         | <b>S</b> | <b>404.2504</b> | 202.6288        | 387.2238        | 194.1155         | 386.2398       | 193.6235         | <b>4</b>  |
| 8  | 836.3785        | 418.6929        | 819.3519       | 410.1796         | <b>818.3679</b> | 409.6876         | <b>V</b> | <b>317.2183</b> | 159.1128        | 300.1918        | 150.5995         |                |                  | <b>3</b>  |
| 9  | <b>907.4156</b> | 454.2114        | 890.3890       | 445.6982         | 889.4050        | 445.2061         | <b>A</b> | <b>218.1499</b> | 109.5786        | 201.1234        | 101.0653         |                |                  | <b>2</b>  |
| 10 |                 |                 |                |                  |                 |                  | <b>K</b> | 147.1128        | 74.0600         | 130.0863        | 65.5468          |                |                  | <b>1</b>  |

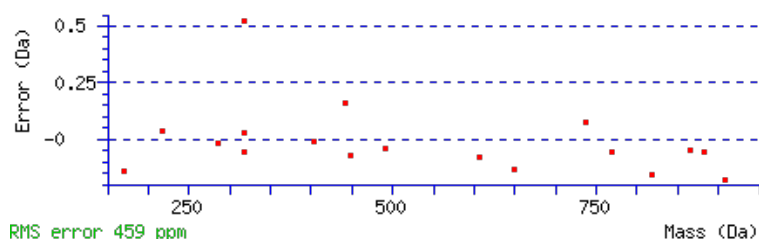

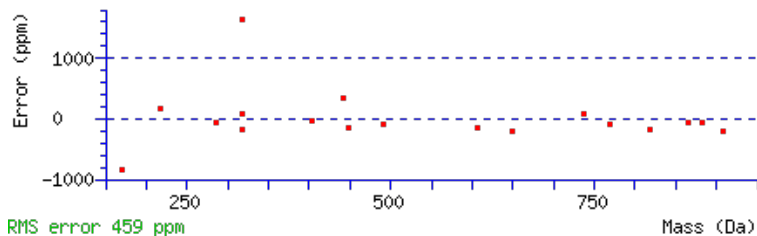

NCBI **BLAST** search of [GINYNSSVAK](#)

(Parameters: blastp, nr protein database, expect=20000, no filter, PAM30)

Other BLAST [web gateways](#)

**All matches to this query**

| Score | Mr(calc)  | Delta   | Sequence                   | Site Analysis        |
|-------|-----------|---------|----------------------------|----------------------|
| 53.6  | 1052.5138 | 0.0025  | <a href="#">GINYNSSVAK</a> | Deamidated N5 99.83% |
| 25.9  | 1052.5138 | 0.0025  | <a href="#">GINYNSSVAK</a> | Deamidated N3 0.17%  |
| 7.0   | 1051.5120 | 1.0043  | <a href="#">WMLSQSKR</a>   |                      |
| 3.9   | 1052.5172 | -0.0008 | <a href="#">MDKKSTAEK</a>  |                      |
| 2.3   | 1052.5138 | 0.0025  | <a href="#">AVSSNYNIGK</a> |                      |
| 1.9   | 1052.5147 | 0.0017  | <a href="#">WGKMMEEKK</a>  |                      |
| 1.5   | 1052.5138 | 0.0025  | <a href="#">AVSSNYNIGK</a> |                      |
| 1.0   | 1051.5121 | 1.0043  | <a href="#">GNVMVDFRV</a>  |                      |
| 0.3   | 1051.5161 | 1.0003  | <a href="#">MLYTPYHK</a>   |                      |
| 0.3   | 1052.5138 | 0.0025  | <a href="#">GLDNGYSISK</a> |                      |

Mascot: <http://www.matrixscience.com/>

# MASCOT SCIENCE Mascot Search Results

## Peptide View

MS/MS Fragmentation of **LETTVNYTDSQRPICLPSKGD**R

Found in **E9PGP2** in **con\_Xumiprot\_HUMAN3**, E9PGP2\_HUMAN Coagulation factor XI OS=Homo sapiens GN=F11 PE=2 SV=1

Match to Query 21927: 2550.243162 from(851.088330,3+) intensity(39617.5742) rtinseconds(916) scans(2034) index(14426)

Title: 111019\_Est\_MI\_YP\_G\_03Spectrum1705\_scans\_\_2034

Data file C:\mascot\20140703\_Tmgf\_1D\CSV\_UseAnalysis\MasterCSV\All\_Glyco\mgf\ptm\UC18ERLIC\_PTM\_35D.mgf

Click mouse within plot area to zoom in by factor of two about that point

Or,  to  Da

Label all possible matches  Label matches used for scoring

Show Y-axis

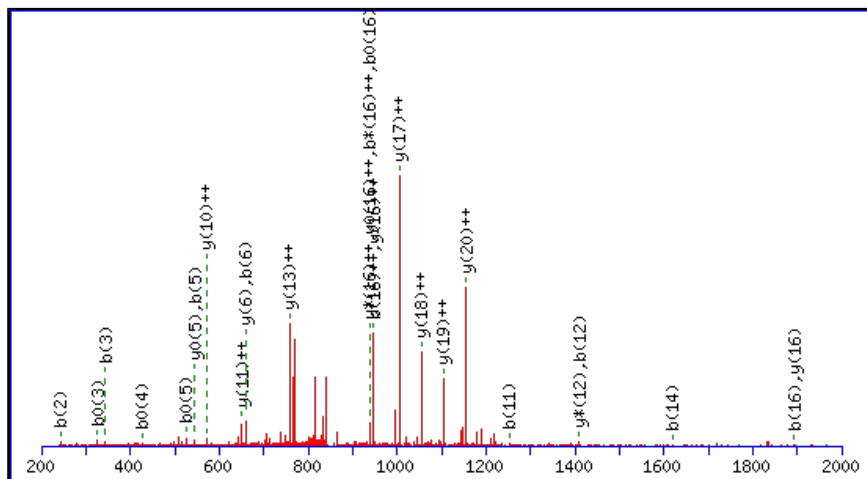

Monoisotopic mass of neutral peptide Mr(calc): 2550.2384

Fixed modifications: Carbamidomethyl (C) (apply to specified residues or termini only)

Variable modifications:

N6 : Deamidated (NQ)

Ions Score: 46 Expect: 0.0079

Matches : 28/238 fragment ions using 35 most intense peaks ([help](#))

| #  | b                | b <sup>++</sup> | b <sup>*</sup> | b <sup>*++</sup> | b <sup>0</sup>  | b <sup>0++</sup> | Seq. | y                | y <sup>++</sup>  | y <sup>*</sup>   | y <sup>*++</sup> | y <sup>0</sup>  | y <sup>0++</sup> | #  |
|----|------------------|-----------------|----------------|------------------|-----------------|------------------|------|------------------|------------------|------------------|------------------|-----------------|------------------|----|
| 1  | 114.0913         | 57.5493         |                |                  |                 |                  | L    |                  |                  |                  |                  |                 |                  | 22 |
| 2  | <b>243.1339</b>  | 122.0706        |                |                  | 225.1234        | 113.0653         | E    | 2438.1616        | 1219.5845        | 2421.1351        | 1211.0712        | 2420.1511       | 1210.5792        | 21 |
| 3  | <b>344.1816</b>  | 172.5944        |                |                  | <b>326.1710</b> | 163.5892         | T    | 2309.1190        | <b>1155.0632</b> | 2292.0925        | 1146.5499        | 2291.1085       | 1146.0579        | 20 |
| 4  | 445.2293         | 223.1183        |                |                  | <b>427.2187</b> | 214.1130         | T    | 2208.0714        | <b>1104.5393</b> | 2191.0448        | 1096.0260        | 2190.0608       | 1095.5340        | 19 |
| 5  | <b>544.2977</b>  | 272.6525        |                |                  | <b>526.2871</b> | 263.6472         | V    | 2107.0237        | <b>1054.0155</b> | 2089.9971        | 1045.5022        | 2089.0131       | 1045.0102        | 18 |
| 6  | <b>659.3246</b>  | 330.1660        | 642.2981       | 321.6527         | 641.3141        | 321.1607         | N    | 2007.9553        | <b>1004.4813</b> | 1990.9287        | 995.9680         | 1989.9447       | 995.4760         | 17 |
| 7  | 822.3880         | 411.6976        | 805.3614       | 403.1844         | 804.3774        | 402.6923         | Y    | <b>1892.9283</b> | <b>946.9678</b>  | 1875.9018        | <b>938.4545</b>  | 1874.9178       | <b>937.9625</b>  | 16 |
| 8  | 923.4357         | 462.2215        | 906.4091       | 453.7082         | 905.4251        | 453.2162         | T    | 1729.8650        | 865.4361         | 1712.8384        | 856.9229         | 1711.8544       | 856.4309         | 15 |
| 9  | 1038.4626        | 519.7349        | 1021.4361      | 511.2217         | 1020.4520       | 510.7297         | D    | 1628.8173        | 814.9123         | 1611.7908        | 806.3990         | 1610.8067       | 805.9070         | 14 |
| 10 | 1125.4946        | 563.2510        | 1108.4681      | 554.7377         | 1107.4841       | 554.2457         | S    | 1513.7904        | <b>757.3988</b>  | 1496.7638        | 748.8855         | 1495.7798       | 748.3935         | 13 |
| 11 | <b>1253.5532</b> | 627.2802        | 1236.5267      | 618.7670         | 1235.5426       | 618.2750         | Q    | 1426.7583        | 713.8828         | <b>1409.7318</b> | 705.3695         | 1408.7478       | 704.8775         | 12 |
| 12 | <b>1409.6543</b> | 705.3308        | 1392.6278      | 696.8175         | 1391.6438       | 696.3255         | R    | 1298.6998        | <b>649.8535</b>  | 1281.6732        | 641.3402         | 1280.6892       | 640.8482         | 11 |
| 13 | 1506.7071        | 753.8572        | 1489.6805      | 745.3439         | 1488.6965       | 744.8519         | P    | 1142.5987        | <b>571.8030</b>  | 1125.5721        | 563.2897         | 1124.5881       | 562.7977         | 10 |
| 14 | <b>1619.7911</b> | 810.3992        | 1602.7646      | 801.8859         | 1601.7806       | 801.3939         | I    | 1045.5459        | 523.2766         | 1028.5193        | 514.7633         | 1027.5353       | 514.2713         | 9  |
| 15 | 1779.8218        | 890.4145        | 1762.7952      | 881.9013         | 1761.8112       | 881.4093         | C    | 932.4618         | 466.7346         | 915.4353         | 458.2213         | 914.4513        | 457.7293         | 8  |
| 16 | <b>1892.9059</b> | <b>946.9566</b> | 1875.8793      | <b>938.4433</b>  | 1874.8953       | <b>937.9513</b>  | L    | 772.4312         | 386.7192         | 755.4046         | 378.2060         | 754.4206        | 377.7139         | 7  |
| 17 | 1989.9586        | 995.4829        | 1972.9321      | 986.9697         | 1971.9481       | 986.4777         | P    | <b>659.3471</b>  | 330.1772         | 642.3206         | 321.6639         | 641.3365        | 321.1719         | 6  |
| 18 | 2076.9906        | 1038.9990       | 2059.9641      | 1030.4857        | 2058.9801       | 1029.9937        | S    | 562.2943         | 281.6508         | 545.2678         | 273.1375         | <b>544.2838</b> | 272.6455         | 5  |
| 19 | 2205.0856        | 1103.0464       | 2188.0591      | 1094.5332        | 2187.0750       | 1094.0412        | K    | 475.2623         | 238.1348         | 458.2358         | 229.6215         | 457.2518        | 229.1295         | 4  |
| 20 | 2262.1071        | 1131.5572       | 2245.0805      | 1123.0439        | 2244.0965       | 1122.5519        | G    | 347.1674         | 174.0873         | 330.1408         | 165.5740         | 329.1568        | 165.0820         | 3  |
| 21 | 2377.1340        | 1189.0706       | 2360.1075      | 1180.5574        | 2359.1235       | 1180.0654        | D    | 290.1459         | 145.5766         | 273.1193         | 137.0633         | 272.1353        | 136.5713         | 2  |
| 22 |                  |                 |                |                  |                 |                  | R    | 175.1190         | 88.0631          | 158.0924         | 79.5498          |                 |                  | 1  |

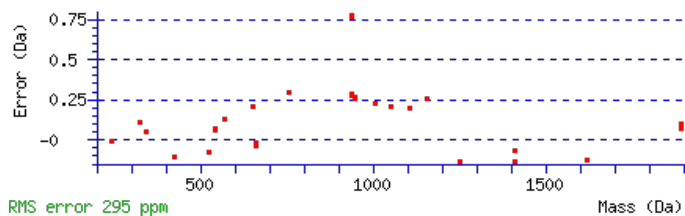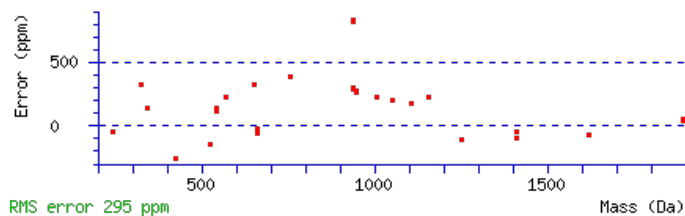

NCBI BLAST search of [LETTVNYTDSQRPICLPSKGDR](#)

(Parameters: blastp, nr protein database, expect=20000, no filter, PAM30)

Other BLAST [web gateways](#)

**All matches to this query**

| Score | Mr(calc)  | Delta  | Sequence                                  | Site Analysis         |
|-------|-----------|--------|-------------------------------------------|-----------------------|
| 45.6  | 2550.2384 | 0.0048 | <a href="#">LETTVNYTDSQRPICLPSKGDR</a>    | Deamidated N6 74.25%  |
| 41.0  | 2550.2384 | 0.0048 | <a href="#">LETTVNYTDSQRPICLPSKGDR</a>    | Deamidated Q11 25.75% |
| 5.5   | 2549.2525 | 0.9906 | <a href="#">QLATASWDTFMLWNEKPHAR</a>      |                       |
| 5.0   | 2548.2422 | 2.0009 | <a href="#">FQTYLLPMYGYVKVFFNICK</a>      |                       |
| 3.3   | 2548.2492 | 1.9939 | <a href="#">GMTEHTKNLLRAFYELSQTHR</a>     |                       |
| 2.5   | 2549.2361 | 1.0070 | <a href="#">LDALLNMHKSMDTALVMDIVMR</a>    |                       |
| 1.4   | 2550.2359 | 0.0072 | <a href="#">MTFHHSMTFKQIVLVGQETQR</a>     |                       |
| 1.2   | 2550.2310 | 0.0122 | <a href="#">RSDSPAADSDASSLHEQPQQAIAIK</a> |                       |
| 1.2   | 2549.2510 | 0.9922 | <a href="#">QNLRSRWHDVQVSSAYVKTSEK</a>    |                       |
| 1.2   | 2550.2424 | 0.0008 | <a href="#">LQGEIDIELTPEMSQHQHALNK</a>    |                       |

Mascot: <http://www.matrixscience.com/>

# MASCOT SCIENCE Mascot Search Results

## Peptide View

MS/MS Fragmentation of **DSVTETLPRVNR**

Found in **D6RB32** in **con\_Xuniprot\_HUMAN3**, D6RB32\_HUMAN Coagulation factor XI OS=Homo sapiens GN=F11 PE=2 SV=1

Match to Query 2397: 1386.714402 from(463.245410,3+) intensity(6614.6401) rtinseconds(690) scans(1460) index(25986)

Title: 111019\_Est\_MI\_YS\_G\_08Spectrum1246\_scans\_\_1460

Data file C:\mascot\20140703\_Tmgf\_1D\CSV\_UseAnalysis\MasterCSV\All\_Glyco\mgf\ptm\UC18ERLIC\_PTM\_35D.mgf

Click mouse within plot area to zoom in by factor of two about that point

Or, to Da

Label all possible matches Label matches used for scoring

Show Y-axis

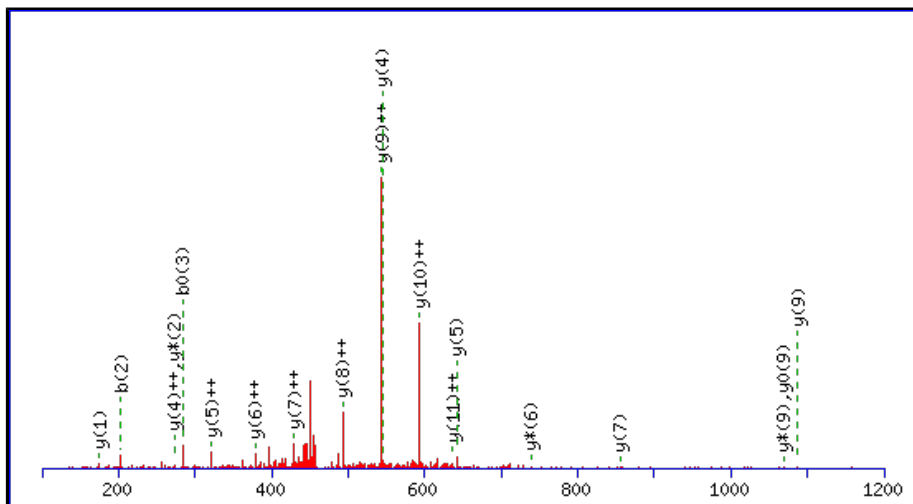

Monoisotopic mass of neutral peptide  $M_r(\text{calc})$ : 1386.7103

Fixed modifications: Carbamidomethyl (C) (apply to specified residues or termini only)

Variable modifications:

N11 : Deamidated (NQ)

Ions Score: 36 Expect: 0.046

Matches : 19/104 fragment ions using 40 most intense peaks ([help](#))

| #  | b         | b <sup>++</sup> | b <sup>*</sup> | b <sup>*++</sup> | b <sup>0</sup> | b <sup>0++</sup> | Seq. | y         | y <sup>++</sup> | y <sup>*</sup> | y <sup>*++</sup> | y <sup>0</sup> | y <sup>0++</sup> | #  |
|----|-----------|-----------------|----------------|------------------|----------------|------------------|------|-----------|-----------------|----------------|------------------|----------------|------------------|----|
| 1  | 116.0342  | 58.5207         |                |                  | 98.0237        | 49.5155          | D    |           |                 |                |                  |                |                  | 12 |
| 2  | 203.0662  | 102.0368        |                |                  | 185.0557       | 93.0315          | S    | 1272.6906 | 636.8490        | 1255.6641      | 628.3357         | 1254.6801      | 627.8437         | 11 |
| 3  | 302.1347  | 151.5710        |                |                  | 284.1241       | 142.5657         | V    | 1185.6586 | 593.3329        | 1168.6321      | 584.8197         | 1167.6480      | 584.3277         | 10 |
| 4  | 403.1823  | 202.0948        |                |                  | 385.1718       | 193.0895         | T    | 1086.5902 | 543.7987        | 1069.5637      | 535.2855         | 1068.5796      | 534.7935         | 9  |
| 5  | 532.2249  | 266.6161        |                |                  | 514.2144       | 257.6108         | E    | 985.5425  | 493.2749        | 968.5160       | 484.7616         | 967.5320       | 484.2696         | 8  |
| 6  | 633.2726  | 317.1399        |                |                  | 615.2620       | 308.1347         | T    | 856.4999  | 428.7536        | 839.4734       | 420.2403         | 838.4894       | 419.7483         | 7  |
| 7  | 746.3567  | 373.6820        |                |                  | 728.3461       | 364.6767         | L    | 755.4522  | 378.2298        | 738.4257       | 369.7165         |                |                  | 6  |
| 8  | 843.4094  | 422.2084        |                |                  | 825.3989       | 413.2031         | P    | 642.3682  | 321.6877        | 625.3416       | 313.1745         |                |                  | 5  |
| 9  | 999.5106  | 500.2589        | 982.4840       | 491.7456         | 981.5000       | 491.2536         | R    | 545.3154  | 273.1613        | 528.2889       | 264.6481         |                |                  | 4  |
| 10 | 1098.5790 | 549.7931        | 1081.5524      | 541.2798         | 1080.5684      | 540.7878         | V    | 389.2143  | 195.1108        | 372.1878       | 186.5975         |                |                  | 3  |
| 11 | 1213.6059 | 607.3066        | 1196.5794      | 598.7933         | 1195.5953      | 598.3013         | N    | 290.1459  | 145.5766        | 273.1193       | 137.0633         |                |                  | 2  |
| 12 |           |                 |                |                  |                |                  | R    | 175.1190  | 88.0631         | 158.0924       | 79.5498          |                |                  | 1  |

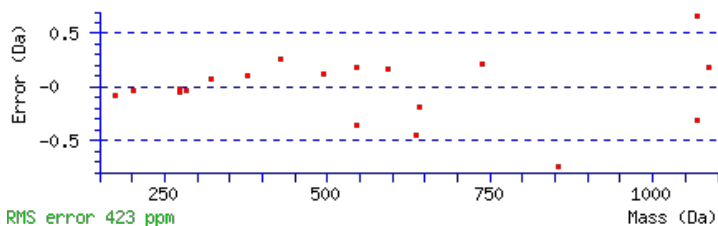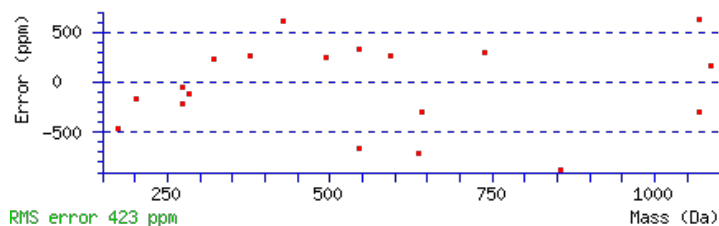



NCBI **BLAST** search of [DSVTETLPRVNR](#)

(Parameters: blastp, nr protein database, expect=20000, no filter, PAM30)

Other BLAST [web gateways](#)

**All matches to this query**

| Score | Mr(calc)  | Delta   | Sequence                      |
|-------|-----------|---------|-------------------------------|
| 36.5  | 1386.7103 | 0.0041  | <a href="#">DSVTETLPRVNR</a>  |
| 10.5  | 1384.7094 | 2.0050  | <a href="#">TVQVVSKMFAMK</a>  |
| 9.8   | 1386.7105 | 0.0039  | <a href="#">MTEFVTQLAITV</a>  |
| 9.1   | 1386.7177 | -0.0033 | <a href="#">YMAALDQIEQR</a>   |
| 8.2   | 1386.7177 | -0.0033 | <a href="#">YMAALDQIEQR</a>   |
| 7.7   | 1385.7052 | 1.0092  | <a href="#">GTAAGPPVEERER</a> |
| 6.8   | 1386.7143 | 0.0001  | <a href="#">HYGQGVISQVIGK</a> |
| 6.8   | 1386.7103 | 0.0041  | <a href="#">DVSLDSVLVNNGR</a> |
| 6.3   | 1384.7133 | 2.0011  | <a href="#">AEVQHIVMGTRK</a>  |
| 6.2   | 1386.7103 | 0.0041  | <a href="#">ETEALNPASATRK</a> |

**Mascot:** <http://www.matrixscience.com/>

# MASCOT SCIENCE Mascot Search Results

## Peptide View

MS/MS Fragmentation of **LSVDKDQYVEPENVTIQDSGYGVVGPQSITCSGNR**

Found in **P04003** in **con\_Xuniprot\_HUMAN3**, C4BPA\_HUMAN C4b-binding protein alpha chain OS=Homo sapiens GN=C4BPA PE=1 SV=2

Match to Query 28231: 3972.817632 from(1325.279820,3+) intensity(20894.2852) rtinseconds(1594) scans(4001) index(24541)

Title: 111019\_Est\_MI\_YS\_G\_06Spectrum3469\_scans\_\_4001

Data file C:\mascot\20140703\_Tmgf\_1D\CSV\_UseAnalysis\MasterCSV\All\_Glyco\mgf\ptm\UC18ERLIC\_PTM\_35D.mgf

Click mouse within plot area to zoom in by factor of two about that point

Or, to Da

Label all possible matches Label matches used for scoring

Show Y-axis

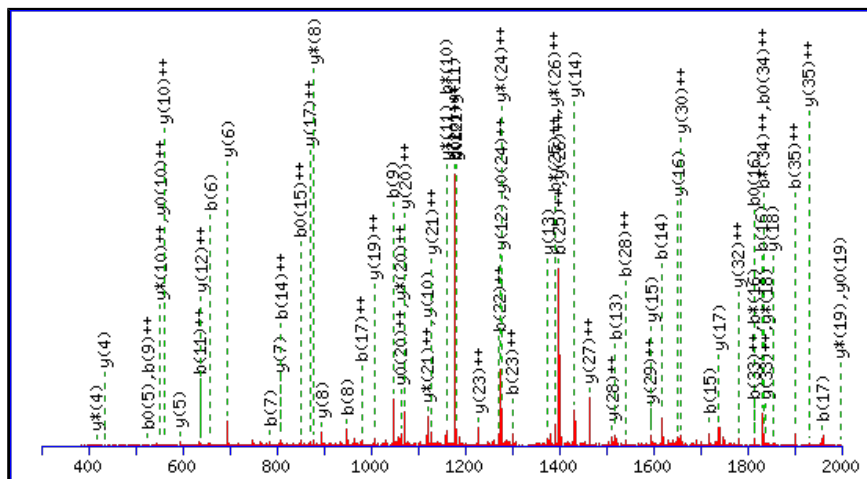

Monoisotopic mass of neutral peptide Mr(calc): 3972.7994

Fixed modifications: Carbamidomethyl (C) (apply to specified residues or termini only)

Variable modifications:

N13 : Deamidated (NQ)

N35 : Deamidated (NQ)

Ions Score: 108 Expect: 2.6e-009

Matches : 73/404 fragment ions using 118 most intense peaks ([help](#))

| #  | b         | b <sup>++</sup> | b <sup>*</sup> | b <sup>*++</sup> | b <sup>0</sup> | b <sup>0++</sup> | Seq. | y         | y <sup>++</sup> | y <sup>*</sup> | y <sup>*++</sup> | y <sup>0</sup> | y <sup>0++</sup> | #  |
|----|-----------|-----------------|----------------|------------------|----------------|------------------|------|-----------|-----------------|----------------|------------------|----------------|------------------|----|
| 1  | 114.0913  | 57.5493         |                |                  |                |                  | L    |           |                 |                |                  |                |                  | 36 |
| 2  | 201.1234  | 101.0653        |                |                  | 183.1128       | 92.0600          | S    | 3860.7226 | 1930.8649       | 3843.6960      | 1922.3516        | 3842.7120      | 1921.8596        | 35 |
| 3  | 300.1918  | 150.5995        |                |                  | 282.1812       | 141.5942         | V    | 3773.6905 | 1887.3489       | 3756.6640      | 1878.8356        | 3755.6800      | 1878.3436        | 34 |
| 4  | 415.2187  | 208.1130        |                |                  | 397.2082       | 199.1077         | D    | 3674.6221 | 1837.8147       | 3657.5956      | 1829.3014        | 3656.6116      | 1828.8094        | 33 |
| 5  | 543.3137  | 272.1605        | 526.2871       | 263.6472         | 525.3031       | 263.1552         | K    | 3559.5952 | 1780.3012       | 3542.5686      | 1771.7879        | 3541.5846      | 1771.2959        | 32 |
| 6  | 658.3406  | 329.6740        | 641.3141       | 321.1607         | 640.3301       | 320.6687         | D    | 3431.5002 | 1716.2537       | 3414.4737      | 1707.7405        | 3413.4896      | 1707.2485        | 31 |
| 7  | 786.3992  | 393.7032        | 769.3727       | 385.1900         | 768.3886       | 384.6980         | Q    | 3316.4733 | 1658.7403       | 3299.4467      | 1650.2270        | 3298.4627      | 1649.7350        | 30 |
| 8  | 949.4625  | 475.2349        | 932.4360       | 466.7216         | 931.4520       | 466.2296         | Y    | 3188.4147 | 1594.7110       | 3171.3881      | 1586.1977        | 3170.4041      | 1585.7057        | 29 |
| 9  | 1048.5310 | 524.7691        | 1031.5044      | 516.2558         | 1030.5204      | 515.7638         | V    | 3025.3514 | 1513.1793       | 3008.3248      | 1504.6660        | 3007.3408      | 1504.1740        | 28 |
| 10 | 1177.5735 | 589.2904        | 1160.5470      | 580.7771         | 1159.5630      | 580.2851         | E    | 2926.2829 | 1463.6451       | 2909.2564      | 1455.1318        | 2908.2724      | 1454.6398        | 27 |
| 11 | 1274.6263 | 637.8168        | 1257.5998      | 629.3035         | 1256.6157      | 628.8115         | P    | 2797.2404 | 1399.1238       | 2780.2138      | 1390.6105        | 2779.2298      | 1390.1185        | 26 |
| 12 | 1403.6689 | 702.3381        | 1386.6424      | 693.8248         | 1385.6583      | 693.3328         | E    | 2700.1876 | 1350.5974       | 2683.1610      | 1342.0842        | 2682.1770      | 1341.5921        | 25 |
| 13 | 1518.6958 | 759.8516        | 1501.6693      | 751.3383         | 1500.6853      | 750.8463         | N    | 2571.1450 | 1286.0761       | 2554.1184      | 1277.5629        | 2553.1344      | 1277.0709        | 24 |
| 14 | 1617.7643 | 809.3858        | 1600.7377      | 800.8725         | 1599.7537      | 800.3805         | V    | 2456.1181 | 1228.5627       | 2439.0915      | 1220.0494        | 2438.1075      | 1219.5574        | 23 |
| 15 | 1718.8119 | 859.9096        | 1701.7854      | 851.3963         | 1700.8014      | 850.9043         | T    | 2357.0496 | 1179.0285       | 2340.0231      | 1170.5152        | 2339.0391      | 1170.0232        | 22 |
| 16 | 1831.8960 | 916.4516        | 1814.8695      | 907.9384         | 1813.8854      | 907.4464         | I    | 2256.0020 | 1128.5046       | 2238.9754      | 1119.9913        | 2237.9914      | 1119.4993        | 21 |
| 17 | 1959.9546 | 980.4809        | 1942.9280      | 971.9677         | 1941.9440      | 971.4756         | Q    | 2142.9179 | 1071.9626       | 2125.8913      | 1063.4493        | 2124.9073      | 1062.9573        | 20 |
| 18 | 2119.9852 | 1060.4963       | 2102.9587      | 1051.9830        | 2101.9747      | 1051.4910        | C    | 2014.8593 | 1007.9333       | 1997.8328      | 999.4200         | 1996.8488      | 998.9280         | 19 |
| 19 | 2235.0122 | 1118.0097       | 2217.9856      | 1109.4964        | 2217.0016      | 1109.0044        | D    | 1854.8287 | 927.9180        | 1837.8021      | 919.4047         | 1836.8181      | 918.9127         | 18 |
| 20 | 2322.0442 | 1161.5257       | 2305.0177      | 1153.0125        | 2304.0336      | 1152.5205        | S    | 1739.8017 | 870.4045        | 1722.7752      | 861.8912         | 1721.7912      | 861.3992         | 17 |
| 21 | 2379.0657 | 1190.0365       | 2362.0391      | 1181.5232        | 2361.0551      | 1181.0312        | G    | 1652.7697 | 826.8885        | 1635.7431      | 818.3752         | 1634.7591      | 817.8832         | 16 |
| 22 | 2542.1290 | 1271.5681       | 2525.1024      | 1263.0549        | 2524.1184      | 1262.5629        | Y    | 1595.7482 | 798.3778        | 1578.7217      | 789.8645         | 1577.7377      | 789.3725         | 15 |

|    |           |                  |           |                  |           |                  |   |                  |                 |                  |                 |           |                 |    |
|----|-----------|------------------|-----------|------------------|-----------|------------------|---|------------------|-----------------|------------------|-----------------|-----------|-----------------|----|
| 23 | 2599.1505 | <b>1300.0789</b> | 2582.1239 | 1291.5656        | 2581.1399 | 1291.0736        | G | <b>1432.6849</b> | 716.8461        | 1415.6584        | 708.3328        | 1414.6743 | 707.8408        | 14 |
| 24 | 2698.2189 | 1349.6131        | 2681.1923 | 1341.0998        | 2680.2083 | 1340.6078        | V | <b>1375.6634</b> | 688.3354        | 1358.6369        | 679.8221        | 1357.6529 | 679.3301        | 13 |
| 25 | 2797.2873 | <b>1399.1473</b> | 2780.2607 | <b>1390.6340</b> | 2779.2767 | 1390.1420        | V | <b>1276.5950</b> | <b>638.8012</b> | 1259.5685        | 630.2879        | 1258.5845 | 629.7959        | 12 |
| 26 | 2854.3087 | 1427.6580        | 2837.2822 | 1419.1447        | 2836.2982 | 1418.6527        | G | <b>1177.5266</b> | 589.2669        | <b>1160.5001</b> | 580.7537        | 1159.5160 | 580.2617        | 11 |
| 27 | 2951.3615 | 1476.1844        | 2934.3350 | 1467.6711        | 2933.3509 | 1467.1791        | P | <b>1120.5051</b> | <b>560.7562</b> | 1103.4786        | <b>552.2429</b> | 1102.4946 | <b>551.7509</b> | 10 |
| 28 | 3079.4201 | <b>1540.2137</b> | 3062.3935 | 1531.7004        | 3061.4095 | 1531.2084        | Q | 1023.4524        | 512.2298        | 1006.4258        | 503.7166        | 1005.4418 | 503.2245        | 9  |
| 29 | 3166.4521 | 1583.7297        | 3149.4256 | 1575.2164        | 3148.4416 | 1574.7244        | S | <b>895.3938</b>  | 448.2005        | <b>878.3673</b>  | 439.6873        | 877.3832  | 439.1953        | 8  |
| 30 | 3279.5362 | 1640.2717        | 3262.5096 | 1631.7585        | 3261.5256 | 1631.2664        | I | <b>808.3618</b>  | 404.6845        | 791.3352         | 396.1713        | 790.3512  | 395.6792        | 7  |
| 31 | 3380.5839 | 1690.7956        | 3363.5573 | 1682.2823        | 3362.5733 | 1681.7903        | T | <b>695.2777</b>  | 348.1425        | 678.2512         | 339.6292        | 677.2671  | 339.1372        | 6  |
| 32 | 3540.6145 | 1770.8109        | 3523.5880 | 1762.2976        | 3522.6039 | 1761.8056        | C | <b>594.2300</b>  | 297.6187        | 577.2035         | 289.1054        | 576.2195  | 288.6134        | 5  |
| 33 | 3627.6465 | <b>1814.3269</b> | 3610.6200 | 1805.8136        | 3609.6360 | 1805.3216        | S | <b>434.1994</b>  | 217.6033        | <b>417.1728</b>  | 209.0901        | 416.1888  | 208.5980        | 4  |
| 34 | 3684.6680 | 1842.8376        | 3667.6415 | <b>1834.3244</b> | 3666.6574 | <b>1833.8324</b> | G | 347.1674         | 174.0873        | 330.1408         | 165.5740        |           |                 | 3  |
| 35 | 3799.6949 | <b>1900.3511</b> | 3782.6684 | 1891.8378        | 3781.6844 | 1891.3458        | N | 290.1459         | 145.5766        | 273.1193         | 137.0633        |           |                 | 2  |
| 36 |           |                  |           |                  |           |                  | R | 175.1190         | 88.0631         | 158.0924         | 79.5498         |           |                 | 1  |

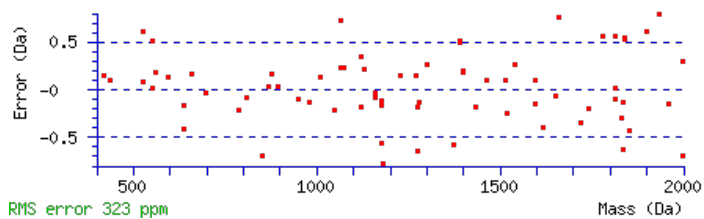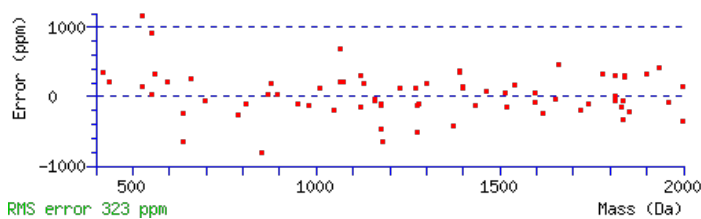

NCBI BLAST search of [LSVDKDQYVEPENVTIQDSGYGVVGPQSITCSGNR](#)

(Parameters: blastp, nr protein database, expect=20000, no filter, PAM30)

Other BLAST [web gateways](#)

All matches to this query

| Score | Mr(calc)  | Delta  | Sequence                                            | Site Analysis              |
|-------|-----------|--------|-----------------------------------------------------|----------------------------|
| 107.9 | 3972.7994 | 0.0183 | <a href="#">LSVDKDQYVEPENVTIQDSGYGVVGPQSITCSGNR</a> | Deamidated N13, N35 54.57% |
| 104.3 | 3972.7994 | 0.0183 | <a href="#">LSVDKDQYVEPENVTIQDSGYGVVGPQSITCSGNR</a> | Deamidated Q7, N35 23.99%  |
| 103.8 | 3972.7994 | 0.0183 | <a href="#">LSVDKDQYVEPENVTIQDSGYGVVGPQSITCSGNR</a> | Deamidated Q17, N35 21.28% |
| 80.8  | 3972.7994 | 0.0183 | <a href="#">LSVDKDQYVEPENVTIQDSGYGVVGPQSITCSGNR</a> | Deamidated Q28, N35 0.11%  |
| 72.6  | 3972.7994 | 0.0183 | <a href="#">LSVDKDQYVEPENVTIQDSGYGVVGPQSITCSGNR</a> | Deamidated N13, Q17 0.02%  |
| 72.5  | 3971.8154 | 1.0023 | <a href="#">LSVDKDQYVEPENVTIQDSGYGVVGPQSITCSGNR</a> |                            |
| 71.9  | 3972.7994 | 0.0183 | <a href="#">LSVDKDQYVEPENVTIQDSGYGVVGPQSITCSGNR</a> | Deamidated N13, Q28 0.01%  |
| 69.5  | 3972.7994 | 0.0183 | <a href="#">LSVDKDQYVEPENVTIQDSGYGVVGPQSITCSGNR</a> | Deamidated Q17, Q28 0.01%  |
| 68.8  | 3972.7994 | 0.0183 | <a href="#">LSVDKDQYVEPENVTIQDSGYGVVGPQSITCSGNR</a> | Deamidated Q7, Q28 0.01%   |
| 64.3  | 3972.7994 | 0.0183 | <a href="#">LSVDKDQYVEPENVTIQDSGYGVVGPQSITCSGNR</a> | Deamidated Q7, Q17 0.00%   |

Mascot: <http://www.matrixscience.com/>

# MASCOT SCIENCE Mascot Search Results

## Peptide View

MS/MS Fragmentation of **LSVDKDQYVEPENVTIQCDSGYGVVGPQSITCSGNR**

Found in **P04003** in **con\_Xuniprot\_HUMAN3**, C4BPA\_HUMAN C4b-binding protein alpha chain OS=Homo sapiens GN=C4BPA PE=1 SV=2

Match to Query 28232: 3972.818262 from(1325.280030,3+) intensity(0.0000) rtinseconds(1648) scans(4093) index(25352)

Title: 111019\_Est\_MI\_YS\_G\_07Spectrum3483\_scans\_\_4093

Data file C:\mascot\20140703\_Tmgf\_1D\CSV\_UseAnalysis\MasterCSV\All\_Glyco\mgf\ptm\UC18ERLIC\_PTM\_35D.mgf

Click mouse within plot area to zoom in by factor of two about that point

Or, to Da

Label all possible matches Label matches used for scoring

Show Y-axis

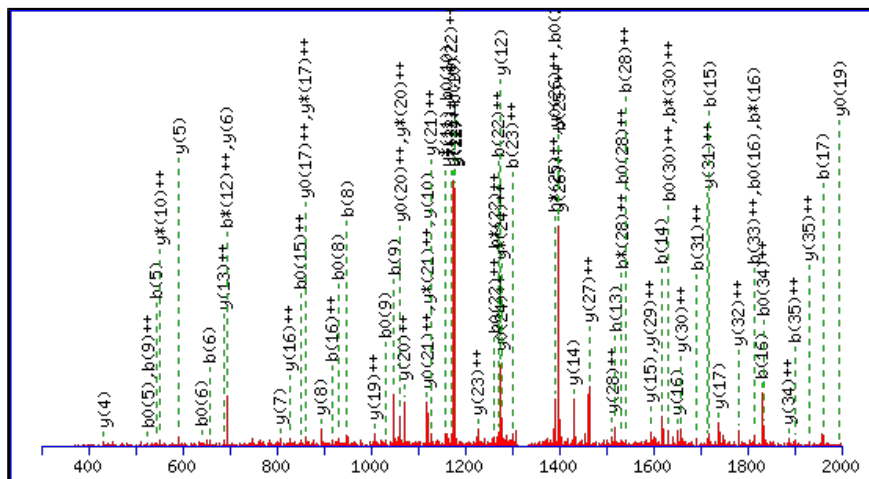

Monoisotopic mass of neutral peptide Mr(calc): 3972.7994

Fixed modifications: Carbamidomethyl (C) (apply to specified residues or termini only)

Variable modifications:

N13 : Deamidated (NQ)

Q17 : Deamidated (NQ)

Ions Score: 102 Expect: 1.1e-008

Matches : 80/404 fragment ions using 119 most intense peaks ([help](#))

| #  | b         | b <sup>++</sup> | b <sup>*</sup> | b <sup>*++</sup> | b <sup>0</sup> | b <sup>0++</sup> | Seq. | y         | y <sup>++</sup> | y <sup>*</sup> | y <sup>*++</sup> | y <sup>0</sup> | y <sup>0++</sup> | #  |
|----|-----------|-----------------|----------------|------------------|----------------|------------------|------|-----------|-----------------|----------------|------------------|----------------|------------------|----|
| 1  | 114.0913  | 57.5493         |                |                  |                |                  | L    |           |                 |                |                  |                |                  | 36 |
| 2  | 201.1234  | 101.0653        |                |                  | 183.1128       | 92.0600          | S    | 3860.7226 | 1930.8649       | 3843.6960      | 1922.3516        | 3842.7120      | 1921.8596        | 35 |
| 3  | 300.1918  | 150.5995        |                |                  | 282.1812       | 141.5942         | V    | 3773.6905 | 1887.3489       | 3756.6640      | 1878.8356        | 3755.6800      | 1878.3436        | 34 |
| 4  | 415.2187  | 208.1130        |                |                  | 397.2082       | 199.1077         | D    | 3674.6221 | 1837.8147       | 3657.5956      | 1829.3014        | 3656.6116      | 1828.8094        | 33 |
| 5  | 543.3137  | 272.1605        | 526.2871       | 263.6472         | 525.3031       | 263.1552         | K    | 3559.5952 | 1780.3012       | 3542.5686      | 1771.7879        | 3541.5846      | 1771.2959        | 32 |
| 6  | 658.3406  | 329.6740        | 641.3141       | 321.1607         | 640.3301       | 320.6687         | D    | 3431.5002 | 1716.2537       | 3414.4737      | 1707.7405        | 3413.4896      | 1707.2485        | 31 |
| 7  | 786.3992  | 393.7032        | 769.3727       | 385.1900         | 768.3886       | 384.6980         | Q    | 3316.4733 | 1658.7403       | 3299.4467      | 1650.2270        | 3298.4627      | 1649.7350        | 30 |
| 8  | 949.4625  | 475.2349        | 932.4360       | 466.7216         | 931.4520       | 466.2296         | Y    | 3188.4147 | 1594.7110       | 3171.3881      | 1586.1977        | 3170.4041      | 1585.7057        | 29 |
| 9  | 1048.5310 | 524.7691        | 1031.5044      | 516.2558         | 1030.5204      | 515.7638         | V    | 3025.3514 | 1513.1793       | 3008.3248      | 1504.6660        | 3007.3408      | 1504.1740        | 28 |
| 10 | 1177.5735 | 589.2904        | 1160.5470      | 580.7771         | 1159.5630      | 580.2851         | E    | 2926.2829 | 1463.6451       | 2909.2564      | 1455.1318        | 2908.2724      | 1454.6398        | 27 |
| 11 | 1274.6263 | 637.8168        | 1257.5998      | 629.3035         | 1256.6157      | 628.8115         | P    | 2797.2404 | 1399.1238       | 2780.2138      | 1390.6105        | 2779.2298      | 1390.1185        | 26 |
| 12 | 1403.6689 | 702.3381        | 1386.6424      | 693.8248         | 1385.6583      | 693.3328         | E    | 2700.1876 | 1350.5974       | 2683.1610      | 1342.0842        | 2682.1770      | 1341.5921        | 25 |
| 13 | 1518.6958 | 759.8516        | 1501.6693      | 751.3383         | 1500.6853      | 750.8463         | N    | 2571.1450 | 1286.0761       | 2554.1184      | 1277.5629        | 2553.1344      | 1277.0709        | 24 |
| 14 | 1617.7643 | 809.3858        | 1600.7377      | 800.8725         | 1599.7537      | 800.3805         | V    | 2456.1181 | 1228.5627       | 2439.0915      | 1220.0494        | 2438.1075      | 1219.5574        | 23 |
| 15 | 1718.8119 | 859.9096        | 1701.7854      | 851.3963         | 1700.8014      | 850.9043         | T    | 2357.0496 | 1179.0285       | 2340.0231      | 1170.5152        | 2339.0391      | 1170.0232        | 22 |
| 16 | 1831.8960 | 916.4516        | 1814.8695      | 907.9384         | 1813.8854      | 907.4464         | I    | 2256.0020 | 1128.5046       | 2238.9754      | 1119.9913        | 2237.9914      | 1119.4993        | 21 |
| 17 | 1960.9386 | 980.9729        | 1943.9120      | 972.4597         | 1942.9280      | 971.9677         | Q    | 2142.9179 | 1071.9626       | 2125.8913      | 1063.4493        | 2124.9073      | 1062.9573        | 20 |
| 18 | 2120.9692 | 1060.9883       | 2103.9427      | 1052.4750        | 2102.9587      | 1051.9830        | C    | 2013.8753 | 1007.4413       | 1996.8488      | 998.9280         | 1995.8647      | 998.4360         | 19 |
| 19 | 2235.9962 | 1118.5017       | 2218.9696      | 1109.9885        | 2217.9856      | 1109.4964        | D    | 1853.8447 | 927.4260        | 1836.8181      | 918.9127         | 1835.8341      | 918.4207         | 18 |
| 20 | 2323.0282 | 1162.0177       | 2306.0017      | 1153.5045        | 2305.0177      | 1153.0125        | S    | 1738.8177 | 869.9125        | 1721.7912      | 861.3992         | 1720.8071      | 860.9072         | 17 |
| 21 | 2380.0497 | 1190.5285       | 2363.0231      | 1182.0152        | 2362.0391      | 1181.5232        | G    | 1651.7857 | 826.3965        | 1634.7591      | 817.8832         | 1633.7751      | 817.3912         | 16 |
| 22 | 2543.1130 | 1272.0601       | 2526.0865      | 1263.5469        | 2525.1024      | 1263.0549        | Y    | 1594.7642 | 797.8857        | 1577.7377      | 789.3725         | 1576.7537      | 788.8805         | 15 |

|    |           |                  |           |                  |           |                  |   |                  |                 |                  |                 |           |          |    |
|----|-----------|------------------|-----------|------------------|-----------|------------------|---|------------------|-----------------|------------------|-----------------|-----------|----------|----|
| 23 | 2600.1345 | <b>1300.5709</b> | 2583.1079 | 1292.0576        | 2582.1239 | 1291.5656        | G | <b>1431.7009</b> | 716.3541        | 1414.6743        | 707.8408        | 1413.6903 | 707.3488 | 14 |
| 24 | 2699.2029 | 1350.1051        | 2682.1763 | 1341.5918        | 2681.1923 | 1341.0998        | V | 1374.6794        | <b>687.8434</b> | 1357.6529        | 679.3301        | 1356.6689 | 678.8381 | 13 |
| 25 | 2798.2713 | <b>1399.6393</b> | 2781.2448 | <b>1391.1260</b> | 2780.2607 | <b>1390.6340</b> | V | <b>1275.6110</b> | 638.3091        | 1258.5845        | 629.7959        | 1257.6004 | 629.3039 | 12 |
| 26 | 2855.2928 | 1428.1500        | 2838.2662 | 1419.6367        | 2837.2822 | 1419.1447        | G | <b>1176.5426</b> | 588.7749        | <b>1159.5160</b> | 580.2617        | 1158.5320 | 579.7697 | 11 |
| 27 | 2952.3455 | 1476.6764        | 2935.3190 | 1468.1631        | 2934.3350 | 1467.6711        | P | <b>1119.5211</b> | 560.2642        | 1102.4946        | <b>551.7509</b> | 1101.5106 | 551.2589 | 10 |
| 28 | 3080.4041 | <b>1540.7057</b> | 3063.3776 | <b>1532.1924</b> | 3062.3935 | <b>1531.7004</b> | Q | 1022.4684        | 511.7378        | 1005.4418        | 503.2245        | 1004.4578 | 502.7325 | 9  |
| 29 | 3167.4361 | 1584.2217        | 3150.4096 | 1575.7084        | 3149.4256 | 1575.2164        | S | <b>894.4098</b>  | 447.7085        | 877.3832         | 439.1953        | 876.3992  | 438.7033 | 8  |
| 30 | 3280.5202 | 1640.7637        | 3263.4936 | <b>1632.2505</b> | 3262.5096 | <b>1631.7585</b> | I | <b>807.3778</b>  | 404.1925        | 790.3512         | 395.6792        | 789.3672  | 395.1872 | 7  |
| 31 | 3381.5679 | <b>1691.2876</b> | 3364.5413 | 1682.7743        | 3363.5573 | 1682.2823        | T | <b>694.2937</b>  | 347.6505        | 677.2671         | 339.1372        | 676.2831  | 338.6452 | 6  |
| 32 | 3541.5985 | 1771.3029        | 3524.5720 | 1762.7896        | 3523.5880 | 1762.2976        | C | <b>593.2460</b>  | 297.1266        | 576.2195         | 288.6134        | 575.2355  | 288.1214 | 5  |
| 33 | 3628.6306 | <b>1814.8189</b> | 3611.6040 | 1806.3056        | 3610.6200 | 1805.8136        | S | <b>433.2154</b>  | 217.1113        | 416.1888         | 208.5980        | 415.2048  | 208.1060 | 4  |
| 34 | 3685.6520 | 1843.3296        | 3668.6255 | 1834.8164        | 3667.6415 | <b>1834.3244</b> | G | 346.1833         | 173.5953        | 329.1568         | 165.0820        |           |          | 3  |
| 35 | 3799.6949 | <b>1900.3511</b> | 3782.6684 | 1891.8378        | 3781.6844 | 1891.3458        | N | 289.1619         | 145.0846        | 272.1353         | 136.5713        |           |          | 2  |
| 36 |           |                  |           |                  |           |                  | R | 175.1190         | 88.0631         | 158.0924         | 79.5498         |           |          | 1  |

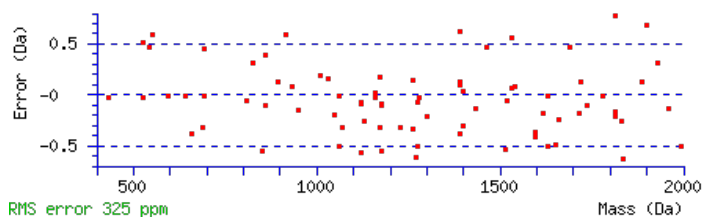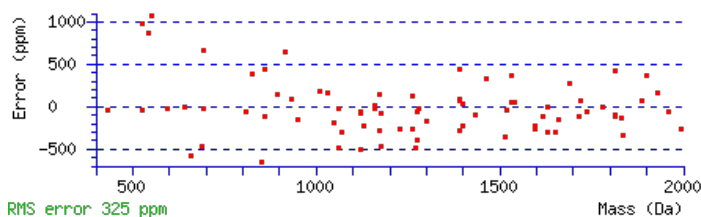

NCBI BLAST search of [LSVDKDQYVEPENVTIQDSGYGVVGPQSITCSGNR](#)

(Parameters: blastp, nr protein database, expect=20000, no filter, PAM30)

Other BLAST [web gateways](#)

All matches to this query

| Score | Mr(calc)  | Delta  | Sequence                                            | Site Analysis              |
|-------|-----------|--------|-----------------------------------------------------|----------------------------|
| 101.8 | 3972.7994 | 0.0189 | <a href="#">LSVDKDQYVEPENVTIQDSGYGVVGPQSITCSGNR</a> | Deamidated N13, Q17 61.62% |
| 95.3  | 3972.7994 | 0.0189 | <a href="#">LSVDKDQYVEPENVTIQDSGYGVVGPQSITCSGNR</a> | Deamidated N13, Q28 14.08% |
| 94.6  | 3972.7994 | 0.0189 | <a href="#">LSVDKDQYVEPENVTIQDSGYGVVGPQSITCSGNR</a> | Deamidated Q7, Q28 11.77%  |
| 93.2  | 3972.7994 | 0.0189 | <a href="#">LSVDKDQYVEPENVTIQDSGYGVVGPQSITCSGNR</a> | Deamidated Q7, Q17 8.64%   |
| 87.7  | 3972.7994 | 0.0189 | <a href="#">LSVDKDQYVEPENVTIQDSGYGVVGPQSITCSGNR</a> | Deamidated Q7, N13 2.44%   |
| 87.3  | 3971.8154 | 1.0029 | <a href="#">LSVDKDQYVEPENVTIQDSGYGVVGPQSITCSGNR</a> |                            |
| 85.3  | 3971.8154 | 1.0029 | <a href="#">LSVDKDQYVEPENVTIQDSGYGVVGPQSITCSGNR</a> |                            |
| 81.4  | 3972.7994 | 0.0189 | <a href="#">LSVDKDQYVEPENVTIQDSGYGVVGPQSITCSGNR</a> | Deamidated Q17, Q28 0.57%  |
| 78.4  | 3971.8154 | 1.0029 | <a href="#">LSVDKDQYVEPENVTIQDSGYGVVGPQSITCSGNR</a> |                            |
| 78.3  | 3971.8154 | 1.0029 | <a href="#">LSVDKDQYVEPENVTIQDSGYGVVGPQSITCSGNR</a> |                            |

Mascot: <http://www.matrixscience.com/>

# MATRIX SCIENCE Mascot Search Results

## Peptide View

MS/MS Fragmentation of **LSVDKDQYVEPENVTIQDSGYGVVGPQSITCSGNR**

Found in **P04003** in **con\_Xuniprot\_HUMAN3**, C4BPA\_HUMAN C4b-binding protein alpha chain OS=Homo sapiens GN=C4BPA PE=1 SV=2

Match to Query 28225: 3972.814016 from(994.210780,4+) intensity(62808.0781) rtinseconds(1576) scans(3918) index(5270)

Title: 111019\_Est\_ISCardio\_NMI\_YP\_G\_8Spectrum3420\_scans\_\_3918

Data file C:\mascot\20140703\_Tmgf\_1D\CSV\_UseAnalysis\MasterCSV\All\_Glyco\mgf\ptm\UC18ERLIC\_PTM\_35D.mgf

Click mouse within plot area to zoom in by factor of two about that point

Or, to Da

Label all possible matches Label matches used for scoring

Show Y-axis

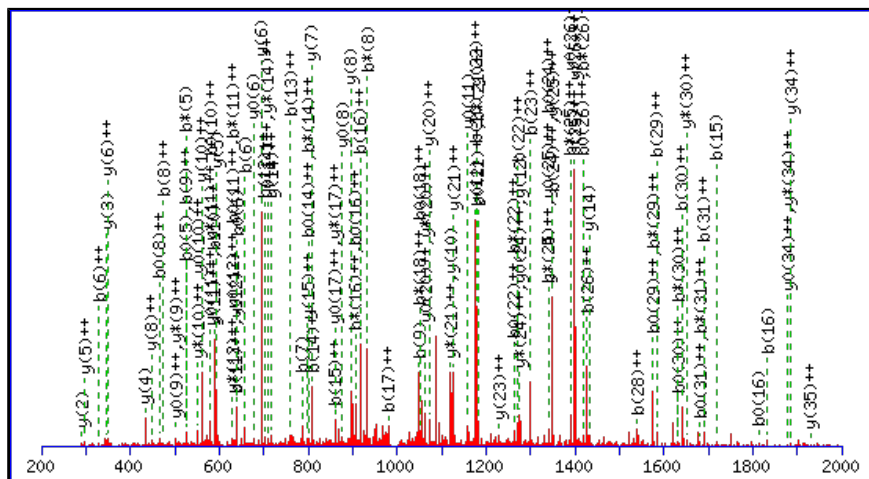

Monoisotopic mass of neutral peptide Mr(calc): 3972.7994

Fixed modifications: Carbamidomethyl (C) (apply to specified residues or termini only)

Variable modifications:

Q7 : Deamidated (NQ)

N35 : Deamidated (NQ)

Ions Score: 88 Expect: 2.7e-007

Matches : 111/404 fragment ions using 170 most intense peaks ([help](#))

| #  | b         | b <sup>++</sup> | b <sup>*</sup> | b <sup>*++</sup> | b <sup>0</sup> | b <sup>0++</sup> | Seq. | y         | y <sup>++</sup> | y <sup>*</sup> | y <sup>*++</sup> | y <sup>0</sup> | y <sup>0++</sup> | #  |
|----|-----------|-----------------|----------------|------------------|----------------|------------------|------|-----------|-----------------|----------------|------------------|----------------|------------------|----|
| 1  | 114.0913  | 57.5493         |                |                  |                |                  | L    |           |                 |                |                  |                |                  | 36 |
| 2  | 201.1234  | 101.0653        |                |                  | 183.1128       | 92.0600          | S    | 3860.7226 | 1930.8649       | 3843.6960      | 1922.3516        | 3842.7120      | 1921.8596        | 35 |
| 3  | 300.1918  | 150.5995        |                |                  | 282.1812       | 141.5942         | V    | 3773.6905 | 1887.3489       | 3756.6640      | 1878.8356        | 3755.6800      | 1878.3436        | 34 |
| 4  | 415.2187  | 208.1130        |                |                  | 397.2082       | 199.1077         | D    | 3674.6221 | 1837.8147       | 3657.5956      | 1829.3014        | 3656.6116      | 1828.8094        | 33 |
| 5  | 543.3137  | 272.1605        | 526.2871       | 263.6472         | 525.3031       | 263.1552         | K    | 3559.5952 | 1780.3012       | 3542.5686      | 1771.7879        | 3541.5846      | 1771.2959        | 32 |
| 6  | 658.3406  | 329.6740        | 641.3141       | 321.1607         | 640.3301       | 320.6687         | D    | 3431.5002 | 1716.2537       | 3414.4737      | 1707.7405        | 3413.4896      | 1707.2485        | 31 |
| 7  | 787.3832  | 394.1953        | 770.3567       | 385.6820         | 769.3727       | 385.1900         | Q    | 3316.4733 | 1658.7403       | 3299.4467      | 1650.2270        | 3298.4627      | 1649.7350        | 30 |
| 8  | 950.4466  | 475.7269        | 933.4200       | 467.2136         | 932.4360       | 466.7216         | Y    | 3187.4307 | 1594.2190       | 3170.4041      | 1585.7057        | 3169.4201      | 1585.2137        | 29 |
| 9  | 1049.5150 | 525.2611        | 1032.4884      | 516.7478         | 1031.5044      | 516.2558         | V    | 3024.3673 | 1512.6873       | 3007.3408      | 1504.1740        | 3006.3568      | 1503.6820        | 28 |
| 10 | 1178.5576 | 589.7824        | 1161.5310      | 581.2691         | 1160.5470      | 580.7771         | E    | 2925.2989 | 1463.1531       | 2908.2724      | 1454.6398        | 2907.2884      | 1454.1478        | 27 |
| 11 | 1275.6103 | 638.3088        | 1258.5838      | 629.7955         | 1257.5998      | 629.3035         | P    | 2796.2563 | 1398.6318       | 2779.2298      | 1390.1185        | 2778.2458      | 1389.6265        | 26 |
| 12 | 1404.6529 | 702.8301        | 1387.6264      | 694.3168         | 1386.6424      | 693.8248         | E    | 2699.2036 | 1350.1054       | 2682.1770      | 1341.5921        | 2681.1930      | 1341.1001        | 25 |
| 13 | 1518.6958 | 759.8516        | 1501.6693      | 751.3383         | 1500.6853      | 750.8463         | N    | 2570.1610 | 1285.5841       | 2553.1344      | 1277.0709        | 2552.1504      | 1276.5788        | 24 |
| 14 | 1617.7643 | 809.3858        | 1600.7377      | 800.8725         | 1599.7537      | 800.3805         | V    | 2456.1181 | 1228.5627       | 2439.0915      | 1220.0494        | 2438.1075      | 1219.5574        | 23 |
| 15 | 1718.8119 | 859.9096        | 1701.7854      | 851.3963         | 1700.8014      | 850.9043         | T    | 2357.0496 | 1179.0285       | 2340.0231      | 1170.5152        | 2339.0391      | 1170.0232        | 22 |
| 16 | 1831.8960 | 916.4516        | 1814.8695      | 907.9384         | 1813.8854      | 907.4464         | I    | 2256.0020 | 1128.5046       | 2238.9754      | 1119.9913        | 2237.9914      | 1119.4993        | 21 |
| 17 | 1959.9546 | 980.4809        | 1942.9280      | 971.9677         | 1941.9440      | 971.4756         | Q    | 2142.9179 | 1071.9626       | 2125.8913      | 1063.4493        | 2124.9073      | 1062.9573        | 20 |
| 18 | 2119.9852 | 1060.4963       | 2102.9587      | 1051.9830        | 2101.9747      | 1051.4910        | C    | 2014.8593 | 1007.9333       | 1997.8328      | 999.4200         | 1996.8488      | 998.9280         | 19 |
| 19 | 2235.0122 | 1118.0097       | 2217.9856      | 1109.4964        | 2217.0016      | 1109.0044        | D    | 1854.8287 | 927.9180        | 1837.8021      | 919.4047         | 1836.8181      | 918.9127         | 18 |
| 20 | 2322.0442 | 1161.5257       | 2305.0177      | 1153.0125        | 2304.0336      | 1152.5205        | S    | 1739.8017 | 870.4045        | 1722.7752      | 861.8912         | 1721.7912      | 861.3992         | 17 |
| 21 | 2379.0657 | 1190.0365       | 2362.0391      | 1181.5232        | 2361.0551      | 1181.0312        | G    | 1652.7697 | 826.8885        | 1635.7431      | 818.3752         | 1634.7591      | 817.8832         | 16 |
| 22 | 2542.1290 | 1271.5681       | 2525.1024      | 1263.0549        | 2524.1184      | 1262.5629        | Y    | 1595.7482 | 798.3778        | 1578.7217      | 789.8645         | 1577.7377      | 789.3725         | 15 |



|    |           |                  |           |                  |           |                  |          |                  |                 |           |                 |                  |                 |           |
|----|-----------|------------------|-----------|------------------|-----------|------------------|----------|------------------|-----------------|-----------|-----------------|------------------|-----------------|-----------|
| 23 | 2599.1505 | <b>1300.0789</b> | 2582.1239 | 1291.5656        | 2581.1399 | 1291.0736        | <b>G</b> | <b>1432.6849</b> | <b>716.8461</b> | 1415.6584 | <b>708.3328</b> | 1414.6743        | <b>707.8408</b> | <b>14</b> |
| 24 | 2698.2189 | <b>1349.6131</b> | 2681.1923 | <b>1341.0998</b> | 2680.2083 | <b>1340.6078</b> | <b>V</b> | 1375.6634        | 688.3354        | 1358.6369 | 679.8221        | 1357.6529        | 679.3301        | <b>13</b> |
| 25 | 2797.2873 | <b>1399.1473</b> | 2780.2607 | <b>1390.6340</b> | 2779.2767 | <b>1390.1420</b> | <b>V</b> | <b>1276.5950</b> | <b>638.8012</b> | 1259.5685 | <b>630.2879</b> | 1258.5845        | <b>629.7959</b> | <b>12</b> |
| 26 | 2854.3087 | <b>1427.6580</b> | 2837.2822 | <b>1419.1447</b> | 2836.2982 | <b>1418.6527</b> | <b>G</b> | <b>1177.5266</b> | <b>589.2669</b> | 1160.5001 | <b>580.7537</b> | <b>1159.5160</b> | <b>580.2617</b> | <b>11</b> |
| 27 | 2951.3615 | 1476.1844        | 2934.3350 | 1467.6711        | 2933.3509 | 1467.1791        | <b>P</b> | <b>1120.5051</b> | <b>560.7562</b> | 1103.4786 | <b>552.2429</b> | 1102.4946        | <b>551.7509</b> | <b>10</b> |
| 28 | 3079.4201 | <b>1540.2137</b> | 3062.3935 | 1531.7004        | 3061.4095 | 1531.2084        | <b>Q</b> | 1023.4524        | 512.2298        | 1006.4258 | <b>503.7166</b> | 1005.4418        | <b>503.2245</b> | <b>9</b>  |
| 29 | 3166.4521 | <b>1583.7297</b> | 3149.4256 | <b>1575.2164</b> | 3148.4416 | <b>1574.7244</b> | <b>S</b> | <b>895.3938</b>  | <b>448.2005</b> | 878.3673  | 439.6873        | <b>877.3832</b>  | 439.1953        | <b>8</b>  |
| 30 | 3279.5362 | <b>1640.2717</b> | 3262.5096 | <b>1631.7585</b> | 3261.5256 | <b>1631.2664</b> | <b>I</b> | <b>808.3618</b>  | 404.6845        | 791.3352  | 396.1713        | 790.3512         | 395.6792        | <b>7</b>  |
| 31 | 3380.5839 | <b>1690.7956</b> | 3363.5573 | <b>1682.2823</b> | 3362.5733 | <b>1681.7903</b> | <b>T</b> | <b>695.2777</b>  | <b>348.1425</b> | 678.2512  | 339.6292        | <b>677.2671</b>  | 339.1372        | <b>6</b>  |
| 32 | 3540.6145 | 1770.8109        | 3523.5880 | 1762.2976        | 3522.6039 | 1761.8056        | <b>C</b> | <b>594.2300</b>  | <b>297.6187</b> | 577.2035  | 289.1054        | 576.2195         | 288.6134        | <b>5</b>  |
| 33 | 3627.6465 | 1814.3269        | 3610.6200 | 1805.8136        | 3609.6360 | 1805.3216        | <b>S</b> | <b>434.1994</b>  | 217.6033        | 417.1728  | 209.0901        | 416.1888         | 208.5980        | <b>4</b>  |
| 34 | 3684.6680 | 1842.8376        | 3667.6415 | 1834.3244        | 3666.6574 | 1833.8324        | <b>G</b> | <b>347.1674</b>  | 174.0873        | 330.1408  | 165.5740        |                  |                 | <b>3</b>  |
| 35 | 3799.6949 | 1900.3511        | 3782.6684 | 1891.8378        | 3781.6844 | 1891.3458        | <b>N</b> | <b>290.1459</b>  | 145.5766        | 273.1193  | 137.0633        |                  |                 | <b>2</b>  |
| 36 |           |                  |           |                  |           |                  | <b>R</b> | 175.1190         | 88.0631         | 158.0924  | 79.5498         |                  |                 | <b>1</b>  |

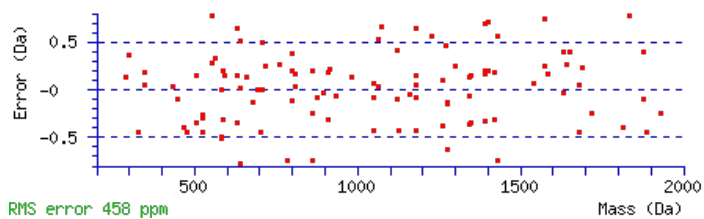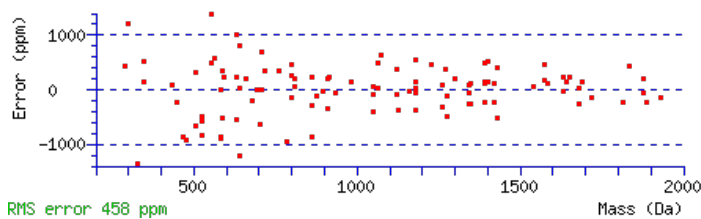

NCBI BLAST search of [LSVDKDQYVEPENVTIQDSGYGVVGPQSITCSGNR](#)

(Parameters: blastp, nr protein database, expect=20000, no filter, PAM30)

Other BLAST [web gateways](#)

**All matches to this query**

| Score | Mr(calc)  | Delta  | Sequence                                            | Site Analysis              |
|-------|-----------|--------|-----------------------------------------------------|----------------------------|
| 87.6  | 3972.7994 | 0.0147 | <a href="#">LSVDKDQYVEPENVTIQDSGYGVVGPQSITCSGNR</a> | Deamidated Q7, N35 59.68%  |
| 84.4  | 3971.8154 | 0.9987 | <a href="#">LSVDKDQYVEPENVTIQDSGYGVVGPQSITCSGNR</a> |                            |
| 82.5  | 3972.7994 | 0.0147 | <a href="#">LSVDKDQYVEPENVTIQDSGYGVVGPQSITCSGNR</a> | Deamidated N13, N35 18.27% |
| 78.4  | 3972.7994 | 0.0147 | <a href="#">LSVDKDQYVEPENVTIQDSGYGVVGPQSITCSGNR</a> | Deamidated Q28, N35 7.21%  |
| 77.5  | 3972.7994 | 0.0147 | <a href="#">LSVDKDQYVEPENVTIQDSGYGVVGPQSITCSGNR</a> | Deamidated Q17, N35 5.81%  |
| 74.3  | 3972.7994 | 0.0147 | <a href="#">LSVDKDQYVEPENVTIQDSGYGVVGPQSITCSGNR</a> | Deamidated N13, Q17 2.75%  |
| 74.3  | 3972.7994 | 0.0147 | <a href="#">LSVDKDQYVEPENVTIQDSGYGVVGPQSITCSGNR</a> | Deamidated Q7, Q17 2.75%   |
| 72.0  | 3972.7994 | 0.0147 | <a href="#">LSVDKDQYVEPENVTIQDSGYGVVGPQSITCSGNR</a> | Deamidated Q7, Q28 1.65%   |
| 68.8  | 3972.7994 | 0.0147 | <a href="#">LSVDKDQYVEPENVTIQDSGYGVVGPQSITCSGNR</a> | Deamidated Q7, N13 0.79%   |
| 67.7  | 3972.7994 | 0.0147 | <a href="#">LSVDKDQYVEPENVTIQDSGYGVVGPQSITCSGNR</a> | Deamidated N13, Q28 0.61%  |

Mascot: <http://www.matrixscience.com/>



# MASCOT SCIENCE Mascot Search Results

## Peptide View

MS/MS Fragmentation of **LSVDKDQYVEPENVTIQCDSGYGVVGPQSITCSGNRTWYPEVPK**

Found in **P04003** in **con\_Xuniprot\_HUMAN3**, C4BPA\_HUMAN C4b-binding protein alpha chain OS=Homo sapiens GN=C4BPA PE=1 SV=2

Match to Query 28997: 4973.322976 from(1244.338020,4+) intensity(18160.8047) rtinseconds(1940) scans(4968) index(26820)

Title: 111019\_Est\_MI\_YS\_G\_09Spectrum4322\_scans\_\_4968

Data file C:\mascot\20140703\_Tmgf\_1D\CSV\_UseAnalysis\MasterCSV\All\_Glyco\mgf\ptm\UC18ERLIC\_PTM\_35D.mgf

Click mouse within plot area to zoom in by factor of two about that point

Or, to Da

Label all possible matches Label matches used for scoring

Show Y-axis

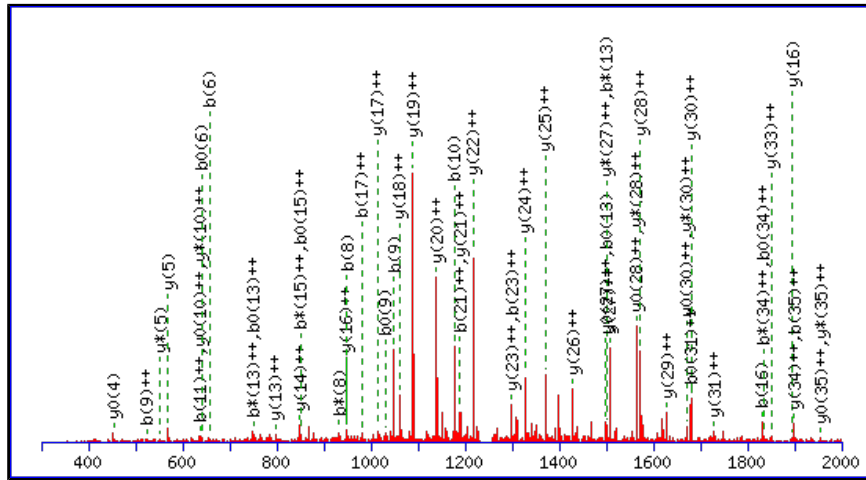

Monoisotopic mass of neutral peptide Mr(calc): 4973.3012

Fixed modifications: Carbamidomethyl (C) (apply to specified residues or termini only)

Variable modifications:

Q28 : Deamidated (NQ)

N35 : Deamidated (NQ)

Ions Score: 87 Expect: 3e-007

Matches : 57/500 fragment ions using 102 most intense peaks ([help](#))

| #  | b                | b <sup>++</sup>  | b <sup>*</sup>   | b <sup>*++</sup> | b <sup>0</sup>   | b <sup>0++</sup> | Seq. | y         | y <sup>++</sup>  | y <sup>*</sup> | y <sup>*++</sup> | y <sup>0</sup> | y <sup>0++</sup> | #  |
|----|------------------|------------------|------------------|------------------|------------------|------------------|------|-----------|------------------|----------------|------------------|----------------|------------------|----|
| 1  | 114.0913         | 57.5493          |                  |                  |                  |                  | L    |           |                  |                |                  |                |                  | 44 |
| 2  | 201.1234         | 101.0653         |                  |                  | 183.1128         | 92.0600          | S    | 4861.2244 | 2431.1158        | 4844.1978      | 2422.6026        | 4843.2138      | 2422.1105        | 43 |
| 3  | 300.1918         | 150.5995         |                  |                  | 282.1812         | 141.5942         | V    | 4774.1923 | 2387.5998        | 4757.1658      | 2379.0865        | 4756.1818      | 2378.5945        | 42 |
| 4  | 415.2187         | 208.1130         |                  |                  | 397.2082         | 199.1077         | D    | 4675.1239 | 2338.0656        | 4658.0974      | 2329.5523        | 4657.1134      | 2329.0603        | 41 |
| 5  | 543.3137         | 272.1605         | 526.2871         | 263.6472         | 525.3031         | 263.1552         | K    | 4560.0970 | 2280.5521        | 4543.0704      | 2272.0389        | 4542.0864      | 2271.5469        | 40 |
| 6  | <b>658.3406</b>  | 329.6740         | 641.3141         | 321.1607         | <b>640.3301</b>  | 320.6687         | D    | 4432.0020 | 2216.5047        | 4414.9755      | 2207.9914        | 4413.9915      | 2207.4994        | 39 |
| 7  | 786.3992         | 393.7032         | 769.3727         | 385.1900         | 768.3886         | 384.6980         | Q    | 4316.9751 | 2158.9912        | 4299.9485      | 2150.4779        | 4298.9645      | 2149.9859        | 38 |
| 8  | <b>949.4625</b>  | 475.2349         | <b>932.4360</b>  | 466.7216         | 931.4520         | 466.2296         | Y    | 4188.9165 | 2094.9619        | 4171.8900      | 2086.4486        | 4170.9059      | 2085.9566        | 37 |
| 9  | <b>1048.5310</b> | <b>524.7691</b>  | 1031.5044        | 516.2558         | <b>1030.5204</b> | 515.7638         | V    | 4025.8532 | 2013.4302        | 4008.8266      | 2004.9170        | 4007.8426      | 2004.4249        | 36 |
| 10 | <b>1177.5735</b> | 589.2904         | 1160.5470        | 580.7771         | 1159.5630        | 580.2851         | E    | 3926.7848 | 1963.8960        | 3909.7582      | <b>1955.3827</b> | 3908.7742      | <b>1954.8907</b> | 35 |
| 11 | 1274.6263        | <b>637.8168</b>  | 1257.5998        | 629.3035         | 1256.6157        | 628.8115         | P    | 3797.7422 | <b>1899.3747</b> | 3780.7156      | 1890.8614        | 3779.7316      | 1890.3694        | 34 |
| 12 | 1403.6689        | 702.3381         | 1386.6424        | 693.8248         | 1385.6583        | 693.3328         | E    | 3700.6894 | <b>1850.8483</b> | 3683.6629      | 1842.3351        | 3682.6788      | 1841.8431        | 33 |
| 13 | 1517.7118        | 759.3596         | <b>1500.6853</b> | <b>750.8463</b>  | <b>1499.7013</b> | <b>750.3543</b>  | N    | 3571.6468 | 1786.3270        | 3554.6203      | 1777.8138        | 3553.6362      | 1777.3218        | 32 |
| 14 | 1616.7802        | 808.8938         | 1599.7537        | 800.3805         | 1598.7697        | 799.8885         | V    | 3457.6039 | <b>1729.3056</b> | 3440.5773      | 1720.7923        | 3439.5933      | 1720.3003        | 31 |
| 15 | 1717.8279        | 859.4176         | 1700.8014        | <b>850.9043</b>  | 1699.8174        | <b>850.4123</b>  | T    | 3358.5355 | <b>1679.7714</b> | 3341.5089      | <b>1671.2581</b> | 3340.5249      | <b>1670.7661</b> | 30 |
| 16 | <b>1830.9120</b> | 915.9596         | 1813.8854        | 907.4464         | 1812.9014        | 906.9543         | I    | 3257.4878 | <b>1629.2475</b> | 3240.4612      | 1620.7343        | 3239.4772      | 1620.2423        | 29 |
| 17 | 1958.9706        | <b>979.9889</b>  | 1941.9440        | 971.4756         | 1940.9600        | 970.9836         | Q    | 3144.4037 | <b>1572.7055</b> | 3127.3772      | <b>1564.1922</b> | 3126.3932      | <b>1563.7002</b> | 28 |
| 18 | 2119.0012        | 1060.0042        | 2101.9747        | 1051.4910        | 2100.9906        | 1050.9990        | C    | 3016.3452 | <b>1508.6762</b> | 2999.3186      | <b>1500.1629</b> | 2998.3346      | <b>1499.6709</b> | 27 |
| 19 | 2234.0282        | 1117.5177        | 2217.0016        | 1109.0044        | 2216.0176        | 1108.5124        | D    | 2856.3145 | <b>1428.6609</b> | 2839.2880      | 1420.1476        | 2838.3039      | 1419.6556        | 26 |
| 20 | 2321.0602        | 1161.0337        | 2304.0336        | 1152.5205        | 2303.0496        | 1152.0284        | S    | 2741.2876 | <b>1371.1474</b> | 2724.2610      | 1362.6341        | 2723.2770      | 1362.1421        | 25 |
| 21 | 2378.0816        | <b>1189.5445</b> | 2361.0551        | 1181.0312        | 2360.0711        | 1180.5392        | G    | 2654.2555 | <b>1327.6314</b> | 2637.2290      | 1319.1181        | 2636.2450      | 1318.6261        | 24 |
| 22 | 2541.1450        | 1271.0761        | 2524.1184        | 1262.5629        | 2523.1344        | 1262.0708        | Y    | 2597.2341 | <b>1299.1207</b> | 2580.2075      | 1290.6074        | 2579.2235      | 1290.1154        | 23 |

|    |           |                  |           |                  |           |                  |   |                  |                  |                 |                 |                 |                 |           |
|----|-----------|------------------|-----------|------------------|-----------|------------------|---|------------------|------------------|-----------------|-----------------|-----------------|-----------------|-----------|
| 23 | 2598.1664 | <b>1299.5869</b> | 2581.1399 | 1291.0736        | 2580.1559 | 1290.5816        | G | 2434.1707        | <b>1217.5890</b> | 2417.1442       | 1209.0757       | 2416.1602       | 1208.5837       | <b>22</b> |
| 24 | 2697.2349 | 1349.1211        | 2680.2083 | 1340.6078        | 2679.2243 | 1340.1158        | V | 2377.1493        | <b>1189.0783</b> | 2360.1227       | 1180.5650       | 2359.1387       | 1180.0730       | <b>21</b> |
| 25 | 2796.3033 | 1398.6553        | 2779.2767 | 1390.1420        | 2778.2927 | 1389.6500        | V | 2278.0809        | <b>1139.5441</b> | 2261.0543       | 1131.0308       | 2260.0703       | 1130.5388       | <b>20</b> |
| 26 | 2853.3247 | 1427.1660        | 2836.2982 | 1418.6527        | 2835.3142 | 1418.1607        | G | 2179.0124        | <b>1090.0099</b> | 2161.9859       | 1081.4966       | 2161.0019       | 1081.0046       | <b>19</b> |
| 27 | 2950.3775 | 1475.6924        | 2933.3509 | 1467.1791        | 2932.3669 | 1466.6871        | P | 2121.9910        | <b>1061.4991</b> | 2104.9644       | 1052.9859       | 2103.9804       | 1052.4938       | <b>18</b> |
| 28 | 3079.4201 | 1540.2137        | 3062.3935 | 1531.7004        | 3061.4095 | 1531.2084        | Q | 2024.9382        | <b>1012.9727</b> | 2007.9117       | 1004.4595       | 2006.9277       | 1003.9675       | <b>17</b> |
| 29 | 3166.4521 | 1583.7297        | 3149.4256 | 1575.2164        | 3148.4416 | 1574.7244        | S | <b>1895.8956</b> | <b>948.4515</b>  | 1878.8691       | 939.9382        | 1877.8851       | 939.4462        | <b>16</b> |
| 30 | 3279.5362 | 1640.2717        | 3262.5096 | 1631.7585        | 3261.5256 | 1631.2664        | I | 1808.8636        | 904.9354         | 1791.8370       | 896.4222        | 1790.8530       | 895.9302        | <b>15</b> |
| 31 | 3380.5839 | 1690.7956        | 3363.5573 | 1682.2823        | 3362.5733 | <b>1681.7903</b> | T | 1695.7795        | <b>848.3934</b>  | 1678.7530       | 839.8801        | 1677.7690       | 839.3881        | <b>14</b> |
| 32 | 3540.6145 | 1770.8109        | 3523.5880 | 1762.2976        | 3522.6039 | 1761.8056        | C | 1594.7319        | <b>797.8696</b>  | 1577.7053       | 789.3563        | 1576.7213       | 788.8643        | <b>13</b> |
| 33 | 3627.6465 | 1814.3269        | 3610.6200 | 1805.8136        | 3609.6360 | 1805.3216        | S | 1434.7012        | 717.8542         | 1417.6747       | 709.3410        | 1416.6906       | 708.8490        | <b>12</b> |
| 34 | 3684.6680 | 1842.8376        | 3667.6415 | <b>1834.3244</b> | 3666.6574 | <b>1833.8324</b> | G | 1347.6692        | 674.3382         | 1330.6426       | 665.8250        | 1329.6586       | 665.3329        | <b>11</b> |
| 35 | 3799.6949 | <b>1900.3511</b> | 3782.6684 | 1891.8378        | 3781.6844 | 1891.3458        | N | 1290.6477        | 645.8275         | 1273.6212       | <b>637.3142</b> | 1272.6371       | <b>636.8222</b> | <b>10</b> |
| 36 | 3955.7961 | 1978.4017        | 3938.7695 | 1969.8884        | 3937.7855 | 1969.3964        | R | 1175.6208        | 588.3140         | 1158.5942       | 579.8007        | 1157.6102       | 579.3087        | <b>9</b>  |
| 37 | 4056.8437 | 2028.9255        | 4039.8172 | 2020.4122        | 4038.8332 | 2019.9202        | T | 1019.5197        | 510.2635         | 1002.4931       | 501.7502        | 1001.5091       | 501.2582        | <b>8</b>  |
| 38 | 4242.9230 | 2121.9652        | 4225.8965 | 2113.4519        | 4224.9125 | 2112.9599        | W | 918.4720         | 459.7396         | 901.4454        | 451.2264        | 900.4614        | 450.7343        | <b>7</b>  |
| 39 | 4405.9864 | 2203.4968        | 4388.9598 | 2194.9836        | 4387.9758 | 2194.4915        | Y | 732.3927         | 366.7000         | 715.3661        | 358.1867        | 714.3821        | 357.6947        | <b>6</b>  |
| 40 | 4503.0391 | 2252.0232        | 4486.0126 | 2243.5099        | 4485.0286 | 2243.0179        | P | <b>569.3293</b>  | 285.1683         | <b>552.3028</b> | 276.6550        | 551.3188        | 276.1630        | <b>5</b>  |
| 41 | 4632.0817 | 2316.5445        | 4615.0552 | 2308.0312        | 4614.0712 | 2307.5392        | E | 472.2766         | 236.6419         | 455.2500        | 228.1287        | <b>454.2660</b> | 227.6366        | <b>4</b>  |
| 42 | 4731.1501 | 2366.0787        | 4714.1236 | 2357.5654        | 4713.1396 | 2357.0734        | V | 343.2340         | 172.1206         | 326.2074        | 163.6074        |                 |                 | <b>3</b>  |
| 43 | 4828.2029 | 2414.6051        | 4811.1764 | 2406.0918        | 4810.1923 | 2405.5998        | P | 244.1656         | 122.5864         | 227.1390        | 114.0731        |                 |                 | <b>2</b>  |
| 44 |           |                  |           |                  |           |                  | K | 147.1128         | 74.0600          | 130.0863        | 65.5468         |                 |                 | <b>1</b>  |

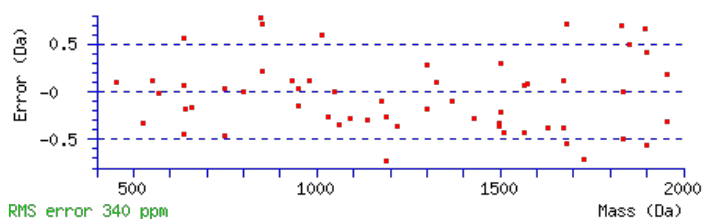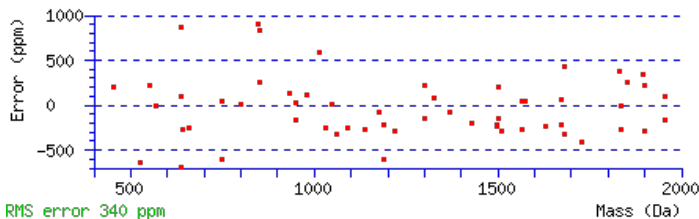

NCBI BLAST search of [LSVDKDQYVEPENVTIQDSGYGVVGPQSITCSGNRTWYPEVPK](#)

(Parameters: blastp, nr protein database, expect=20000, no filter, PAM30)

Other BLAST [web gateways](#)

All matches to this query

| Score | Mr(calc)  | Delta  | Sequence                                                    | Site Analysis              |
|-------|-----------|--------|-------------------------------------------------------------|----------------------------|
| 87.4  | 4973.3012 | 0.0218 | <a href="#">LSVDKDQYVEPENVTIQDSGYGVVGPQSITCSGNRTWYPEVPK</a> | Deamidated Q28, N35 94.47% |
| 71.4  | 4973.3012 | 0.0218 | <a href="#">LSVDKDQYVEPENVTIQDSGYGVVGPQSITCSGNRTWYPEVPK</a> | Deamidated Q17, N35 2.41%  |
| 68.8  | 4973.3012 | 0.0218 | <a href="#">LSVDKDQYVEPENVTIQDSGYGVVGPQSITCSGNRTWYPEVPK</a> | Deamidated Q17, Q28 1.33%  |
| 67.4  | 4973.3012 | 0.0218 | <a href="#">LSVDKDQYVEPENVTIQDSGYGVVGPQSITCSGNRTWYPEVPK</a> | Deamidated N13, N35 0.96%  |
| 64.8  | 4973.3012 | 0.0218 | <a href="#">LSVDKDQYVEPENVTIQDSGYGVVGPQSITCSGNRTWYPEVPK</a> | Deamidated N13, Q28 0.53%  |
| 60.6  | 4973.3012 | 0.0218 | <a href="#">LSVDKDQYVEPENVTIQDSGYGVVGPQSITCSGNRTWYPEVPK</a> | Deamidated N13, Q17 0.20%  |
| 57.8  | 4972.3172 | 1.0058 | <a href="#">LSVDKDQYVEPENVTIQDSGYGVVGPQSITCSGNRTWYPEVPK</a> |                            |
| 55.7  | 4973.3012 | 0.0218 | <a href="#">LSVDKDQYVEPENVTIQDSGYGVVGPQSITCSGNRTWYPEVPK</a> | Deamidated Q7, N35 0.06%   |
| 51.9  | 4972.3172 | 1.0058 | <a href="#">LSVDKDQYVEPENVTIQDSGYGVVGPQSITCSGNRTWYPEVPK</a> |                            |
| 50.6  | 4972.3172 | 1.0058 | <a href="#">LSVDKDQYVEPENVTIQDSGYGVVGPQSITCSGNRTWYPEVPK</a> |                            |

Mascot: <http://www.matrixscience.com/>

# MASCOT SCIENCE Mascot Search Results

## Peptide View

MS/MS Fragmentation of **LSVDKDQYVEPENVTIQCDSGYGVVGPQSITCSGNR**

Found in **P04003** in **con\_Xuniprot\_HUMAN3**, C4BPA\_HUMAN C4b-binding protein alpha chain OS=Homo sapiens GN=C4BPA PE=1 SV=2

Match to Query 28228: 3972.815832 from(1325.279220,3+) intensity(12761.7080) rtinseconds(1604) scans(3995) index(5284)

Title: 111019\_Est\_ISCardio\_NMI\_YP\_G\_8Spectrum3489\_scans\_\_3995

Data file C:\mascot\20140703\_Tmgf\_1D\CSV\_UseAnalysis\MasterCSV\All\_Glyco\mgf\ptm\UC18ERLIC\_PTM\_35D.mgf

Click mouse within plot area to zoom in by factor of two about that point

Or, to Da

Label all possible matches Label matches used for scoring

Show Y-axis

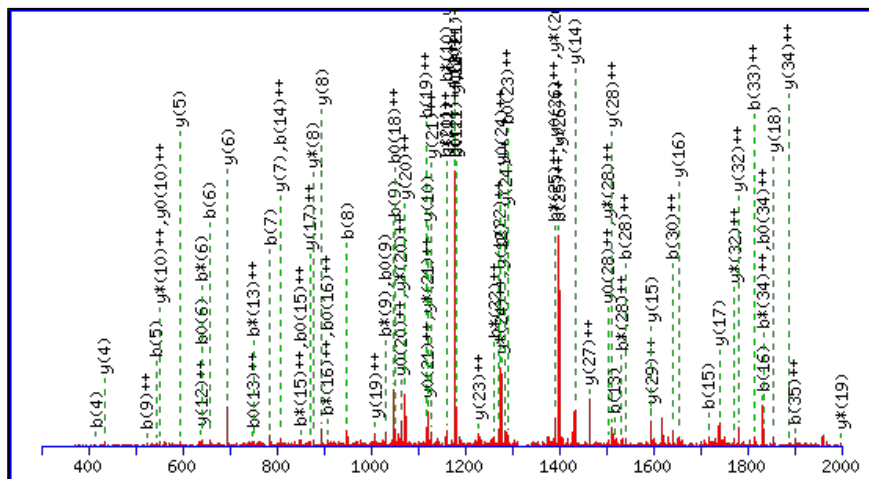

Monoisotopic mass of neutral peptide Mr(calc): 3972.7994

Fixed modifications: Carbamidomethyl (C) (apply to specified residues or termini only)

Variable modifications:

Q28 : Deamidated (NQ)

N35 : Deamidated (NQ)

Ions Score: 80 Expect: 1.5e-006

Matches : 84/404 fragment ions using 133 most intense peaks ([help](#))

| #  | b         | b <sup>++</sup> | b <sup>*</sup> | b <sup>*++</sup> | b <sup>0</sup> | b <sup>0++</sup> | Seq. | y         | y <sup>++</sup> | y <sup>*</sup> | y <sup>*++</sup> | y <sup>0</sup> | y <sup>0++</sup> | #  |
|----|-----------|-----------------|----------------|------------------|----------------|------------------|------|-----------|-----------------|----------------|------------------|----------------|------------------|----|
| 1  | 114.0913  | 57.5493         |                |                  |                |                  | L    |           |                 |                |                  |                |                  | 36 |
| 2  | 201.1234  | 101.0653        |                |                  | 183.1128       | 92.0600          | S    | 3860.7226 | 1930.8649       | 3843.6960      | 1922.3516        | 3842.7120      | 1921.8596        | 35 |
| 3  | 300.1918  | 150.5995        |                |                  | 282.1812       | 141.5942         | V    | 3773.6905 | 1887.3489       | 3756.6640      | 1878.8356        | 3755.6800      | 1878.3436        | 34 |
| 4  | 415.2187  | 208.1130        |                |                  | 397.2082       | 199.1077         | D    | 3674.6221 | 1837.8147       | 3657.5956      | 1829.3014        | 3656.6116      | 1828.8094        | 33 |
| 5  | 543.3137  | 272.1605        | 526.2871       | 263.6472         | 525.3031       | 263.1552         | K    | 3559.5952 | 1780.3012       | 3542.5686      | 1771.7879        | 3541.5846      | 1771.2959        | 32 |
| 6  | 658.3406  | 329.6740        | 641.3141       | 321.1607         | 640.3301       | 320.6687         | D    | 3431.5002 | 1716.2537       | 3414.4737      | 1707.7405        | 3413.4896      | 1707.2485        | 31 |
| 7  | 786.3992  | 393.7032        | 769.3727       | 385.1900         | 768.3886       | 384.6980         | Q    | 3316.4733 | 1658.7403       | 3299.4467      | 1650.2270        | 3298.4627      | 1649.7350        | 30 |
| 8  | 949.4625  | 475.2349        | 932.4360       | 466.7216         | 931.4520       | 466.2296         | Y    | 3188.4147 | 1594.7110       | 3171.3881      | 1586.1977        | 3170.4041      | 1585.7057        | 29 |
| 9  | 1048.5310 | 524.7691        | 1031.5044      | 516.2558         | 1030.5204      | 515.7638         | V    | 3025.3514 | 1513.1793       | 3008.3248      | 1504.6660        | 3007.3408      | 1504.1740        | 28 |
| 10 | 1177.5735 | 589.2904        | 1160.5470      | 580.7771         | 1159.5630      | 580.2851         | E    | 2926.2829 | 1463.6451       | 2909.2564      | 1455.1318        | 2908.2724      | 1454.6398        | 27 |
| 11 | 1274.6263 | 637.8168        | 1257.5998      | 629.3035         | 1256.6157      | 628.8115         | P    | 2797.2404 | 1399.1238       | 2780.2138      | 1390.6105        | 2779.2298      | 1390.1185        | 26 |
| 12 | 1403.6689 | 702.3381        | 1386.6424      | 693.8248         | 1385.6583      | 693.3328         | E    | 2700.1876 | 1350.5974       | 2683.1610      | 1342.0842        | 2682.1770      | 1341.5921        | 25 |
| 13 | 1517.7118 | 759.3596        | 1500.6853      | 750.8463         | 1499.7013      | 750.3543         | N    | 2571.1450 | 1286.0761       | 2554.1184      | 1277.5629        | 2553.1344      | 1277.0709        | 24 |
| 14 | 1616.7802 | 808.8938        | 1599.7537      | 800.3805         | 1598.7697      | 799.8885         | V    | 2457.1021 | 1229.0547       | 2440.0755      | 1220.5414        | 2439.0915      | 1220.0494        | 23 |
| 15 | 1717.8279 | 859.4176        | 1700.8014      | 850.9043         | 1699.8174      | 850.4123         | T    | 2358.0337 | 1179.5205       | 2341.0071      | 1171.0072        | 2340.0231      | 1170.5152        | 22 |
| 16 | 1830.9120 | 915.9596        | 1813.8854      | 907.4464         | 1812.9014      | 906.9543         | I    | 2256.9860 | 1128.9966       | 2239.9594      | 1120.4834        | 2238.9754      | 1119.9913        | 21 |
| 17 | 1958.9706 | 979.9889        | 1941.9440      | 971.4756         | 1940.9600      | 970.9836         | Q    | 2143.9019 | 1072.4546       | 2126.8754      | 1063.9413        | 2125.8913      | 1063.4493        | 20 |
| 18 | 2119.0012 | 1060.0042       | 2101.9747      | 1051.4910        | 2100.9906      | 1050.9990        | C    | 2015.8433 | 1008.4253       | 1998.8168      | 999.9120         | 1997.8328      | 999.4200         | 19 |
| 19 | 2234.0282 | 1117.5177       | 2217.0016      | 1109.0044        | 2216.0176      | 1108.5124        | D    | 1855.8127 | 928.4100        | 1838.7861      | 919.8967         | 1837.8021      | 919.4047         | 18 |
| 20 | 2321.0602 | 1161.0337       | 2304.0336      | 1152.5205        | 2303.0496      | 1152.0284        | S    | 1740.7857 | 870.8965        | 1723.7592      | 862.3832         | 1722.7752      | 861.8912         | 17 |
| 21 | 2378.0816 | 1189.5445       | 2361.0551      | 1181.0312        | 2360.0711      | 1180.5392        | G    | 1653.7537 | 827.3805        | 1636.7272      | 818.8672         | 1635.7431      | 818.3752         | 16 |
| 22 | 2541.1450 | 1271.0761       | 2524.1184      | 1262.5629        | 2523.1344      | 1262.0708        | Y    | 1596.7322 | 798.8698        | 1579.7057      | 790.3565         | 1578.7217      | 789.8645         | 15 |

|    |           |           |           |           |           |           |   |           |          |           |          |           |          |    |
|----|-----------|-----------|-----------|-----------|-----------|-----------|---|-----------|----------|-----------|----------|-----------|----------|----|
| 23 | 2598.1664 | 1299.5869 | 2581.1399 | 1291.0736 | 2580.1559 | 1290.5816 | G | 1433.6689 | 717.3381 | 1416.6424 | 708.8248 | 1415.6584 | 708.3328 | 14 |
| 24 | 2697.2349 | 1349.1211 | 2680.2083 | 1340.6078 | 2679.2243 | 1340.1158 | V | 1376.6475 | 688.8274 | 1359.6209 | 680.3141 | 1358.6369 | 679.8221 | 13 |
| 25 | 2796.3033 | 1398.6553 | 2779.2767 | 1390.1420 | 2778.2927 | 1389.6500 | V | 1277.5790 | 639.2932 | 1260.5525 | 630.7799 | 1259.5685 | 630.2879 | 12 |
| 26 | 2853.3247 | 1427.1660 | 2836.2982 | 1418.6527 | 2835.3142 | 1418.1607 | G | 1178.5106 | 589.7590 | 1161.4841 | 581.2457 | 1160.5001 | 580.7537 | 11 |
| 27 | 2950.3775 | 1475.6924 | 2933.3509 | 1467.1791 | 2932.3669 | 1466.6871 | P | 1121.4892 | 561.2482 | 1104.4626 | 552.7349 | 1103.4786 | 552.2429 | 10 |
| 28 | 3079.4201 | 1540.2137 | 3062.3935 | 1531.7004 | 3061.4095 | 1531.2084 | Q | 1024.4364 | 512.7218 | 1007.4099 | 504.2086 | 1006.4258 | 503.7166 | 9  |
| 29 | 3166.4521 | 1583.7297 | 3149.4256 | 1575.2164 | 3148.4416 | 1574.7244 | S | 895.3938  | 448.2005 | 878.3673  | 439.6873 | 877.3832  | 439.1953 | 8  |
| 30 | 3279.5362 | 1640.2717 | 3262.5096 | 1631.7585 | 3261.5256 | 1631.2664 | I | 808.3618  | 404.6845 | 791.3352  | 396.1713 | 790.3512  | 395.6792 | 7  |
| 31 | 3380.5839 | 1690.7956 | 3363.5573 | 1682.2823 | 3362.5733 | 1681.7903 | T | 695.2777  | 348.1425 | 678.2512  | 339.6292 | 677.2671  | 339.1372 | 6  |
| 32 | 3540.6145 | 1770.8109 | 3523.5880 | 1762.2976 | 3522.6039 | 1761.8056 | C | 594.2300  | 297.6187 | 577.2035  | 289.1054 | 576.2195  | 288.6134 | 5  |
| 33 | 3627.6465 | 1814.3269 | 3610.6200 | 1805.8136 | 3609.6360 | 1805.3216 | S | 434.1994  | 217.6033 | 417.1728  | 209.0901 | 416.1888  | 208.5980 | 4  |
| 34 | 3684.6680 | 1842.8376 | 3667.6415 | 1834.3244 | 3666.6574 | 1833.8324 | G | 347.1674  | 174.0873 | 330.1408  | 165.5740 |           |          | 3  |
| 35 | 3799.6949 | 1900.3511 | 3782.6684 | 1891.8378 | 3781.6844 | 1891.3458 | N | 290.1459  | 145.5766 | 273.1193  | 137.0633 |           |          | 2  |
| 36 |           |           |           |           |           |           | R | 175.1190  | 88.0631  | 158.0924  | 79.5498  |           |          | 1  |

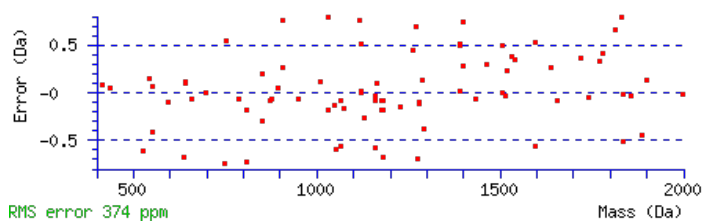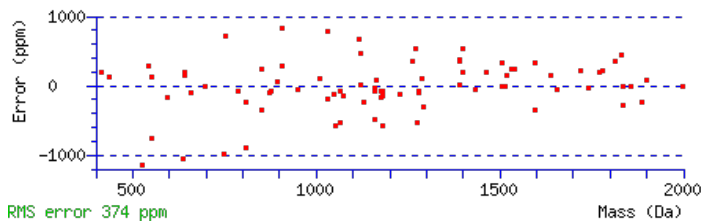

NCBI BLAST search of [LSVDKDQYVEPENVTIQDSGYGVVGPQSITCSGNR](#)

(Parameters: blastp, nr protein database, expect=20000, no filter, PAM30)

Other BLAST [web gateways](#)

All matches to this query

| Score | Mr(calc)  | Delta  | Sequence                                            | Site Analysis              |
|-------|-----------|--------|-----------------------------------------------------|----------------------------|
| 80.1  | 3972.7994 | 0.0165 | <a href="#">LSVDKDQYVEPENVTIQDSGYGVVGPQSITCSGNR</a> | Deamidated Q28, N35 52.29% |
| 76.6  | 3972.7994 | 0.0165 | <a href="#">LSVDKDQYVEPENVTIQDSGYGVVGPQSITCSGNR</a> | Deamidated N13, N35 23.20% |
| 74.2  | 3972.7994 | 0.0165 | <a href="#">LSVDKDQYVEPENVTIQDSGYGVVGPQSITCSGNR</a> | Deamidated Q17, N35 13.44% |
| 73.0  | 3972.7994 | 0.0165 | <a href="#">LSVDKDQYVEPENVTIQDSGYGVVGPQSITCSGNR</a> | Deamidated Q7, N35 10.20%  |
| 63.3  | 3971.8154 | 1.0005 | <a href="#">LSVDKDQYVEPENVTIQDSGYGVVGPQSITCSGNR</a> |                            |
| 57.5  | 3972.7994 | 0.0165 | <a href="#">LSVDKDQYVEPENVTIQDSGYGVVGPQSITCSGNR</a> | Deamidated N13, Q28 0.28%  |
| 56.4  | 3972.7994 | 0.0165 | <a href="#">LSVDKDQYVEPENVTIQDSGYGVVGPQSITCSGNR</a> | Deamidated Q17, Q28 0.22%  |
| 55.8  | 3972.7994 | 0.0165 | <a href="#">LSVDKDQYVEPENVTIQDSGYGVVGPQSITCSGNR</a> | Deamidated Q7, Q28 0.19%   |
| 52.3  | 3971.8154 | 1.0005 | <a href="#">LSVDKDQYVEPENVTIQDSGYGVVGPQSITCSGNR</a> |                            |
| 51.1  | 3972.7994 | 0.0165 | <a href="#">LSVDKDQYVEPENVTIQDSGYGVVGPQSITCSGNR</a> | Deamidated N13, Q17 0.07%  |

Mascot: <http://www.matrixscience.com/>

# MASCOT SCIENCE Mascot Search Results

## Peptide View

MS/MS Fragmentation of **DQYVEPENVTIQDSGYGVVGPQSITCSGNR**

Found in **P04003** in **con\_Xuniprot\_HUMAN3**, C4BPA\_HUMAN C4b-binding protein alpha chain OS=Homo sapiens GN=C4BPA PE=1 SV=2

Match to Query 27716: 3430.503822 from(1144.508550,3+) intensity(6541.9609) rtinseconds(1740) scans(4263) index(7090)

Title: 111019\_Est\_ISCardio\_NMI\_YP\_G\_10Spectrum3708\_scans\_4263

Data file C:\mascot\20140703\_Tmgf\_1D\CSV\_UseAnalysis\MasterCSV\All\_Glyco\mgf\ptm\UC18ERLIC\_PTM\_35D.mgf

Click mouse within plot area to zoom in by factor of two about that point

Or, to Da

Label all possible matches Label matches used for scoring

Show Y-axis

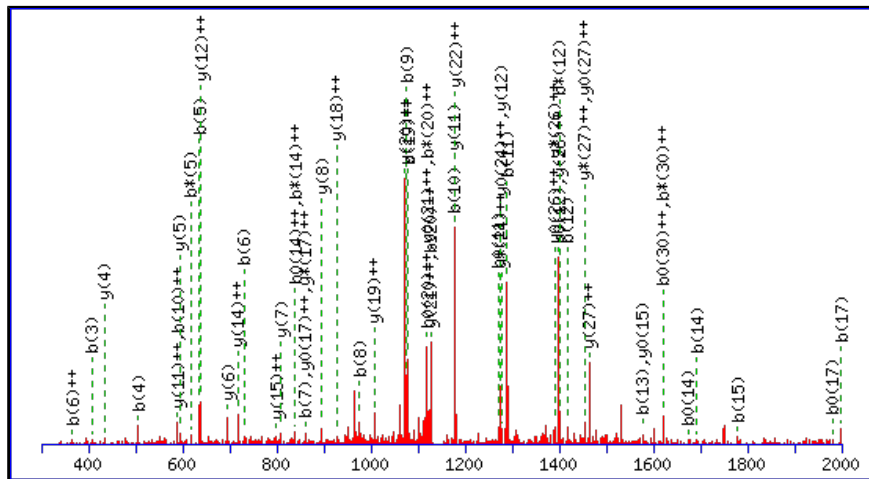

Monoisotopic mass of neutral peptide Mr(calc): 3430.4929

Fixed modifications: Carbamidomethyl (C) (apply to specified residues or termini only)

Variable modifications:

N8 : Deamidated (NQ)

N30 : Deamidated (NQ)

Ions Score: 78 Expect: 1.8e-006

Matches : 58/352 fragment ions using 85 most intense peaks ([help](#))

| #  | b                | b <sup>++</sup>  | b <sup>*</sup>   | b <sup>*++</sup> | b <sup>0</sup>   | b <sup>0++</sup> | Seq. | y                | y <sup>++</sup>  | y <sup>*</sup> | y <sup>*++</sup> | y <sup>0</sup>   | y <sup>0++</sup> | #  |
|----|------------------|------------------|------------------|------------------|------------------|------------------|------|------------------|------------------|----------------|------------------|------------------|------------------|----|
| 1  | 116.0342         | 58.5207          |                  |                  | 98.0237          | 49.5155          | D    |                  |                  |                |                  |                  |                  | 31 |
| 2  | 244.0928         | 122.5500         | 227.0662         | 114.0368         | 226.0822         | 113.5448         | Q    | 3316.4733        | 1658.7403        | 3299.4467      | 1650.2270        | 3298.4627        | 1649.7350        | 30 |
| 3  | <b>407.1561</b>  | 204.0817         | 390.1296         | 195.5684         | 389.1456         | 195.0764         | Y    | 3188.4147        | 1594.7110        | 3171.3881      | 1586.1977        | 3170.4041        | 1585.7057        | 29 |
| 4  | <b>506.2245</b>  | 253.6159         | 489.1980         | 245.1026         | 488.2140         | 244.6106         | V    | 3025.3514        | 1513.1793        | 3008.3248      | 1504.6660        | 3007.3408        | 1504.1740        | 28 |
| 5  | <b>635.2671</b>  | 318.1372         | <b>618.2406</b>  | 309.6239         | 617.2566         | 309.1319         | E    | 2926.2829        | <b>1463.6451</b> | 2909.2564      | <b>1455.1318</b> | 2908.2724        | <b>1454.6398</b> | 27 |
| 6  | <b>732.3199</b>  | <b>366.6636</b>  | 715.2933         | 358.1503         | 714.3093         | 357.6583         | P    | 2797.2404        | <b>1399.1238</b> | 2780.2138      | <b>1390.6105</b> | 2779.2298        | <b>1390.1185</b> | 26 |
| 7  | <b>861.3625</b>  | 431.1849         | 844.3359         | 422.6716         | 843.3519         | 422.1796         | E    | 2700.1876        | 1350.5974        | 2683.1610      | 1342.0842        | 2682.1770        | 1341.5921        | 25 |
| 8  | <b>976.3894</b>  | 488.6984         | 959.3629         | 480.1851         | 958.3789         | 479.6931         | N    | 2571.1450        | 1286.0761        | 2554.1184      | <b>1277.5629</b> | 2553.1344        | <b>1277.0709</b> | 24 |
| 9  | <b>1075.4578</b> | 538.2326         | 1058.4313        | 529.7193         | 1057.4473        | 529.2273         | V    | 2456.1181        | 1228.5627        | 2439.0915      | 1220.0494        | 2438.1075        | 1219.5574        | 23 |
| 10 | <b>1176.5055</b> | <b>588.7564</b>  | 1159.4790        | 580.2431         | 1158.4950        | 579.7511         | T    | 2357.0496        | <b>1179.0285</b> | 2340.0231      | 1170.5152        | 2339.0391        | 1170.0232        | 22 |
| 11 | <b>1289.5896</b> | 645.2984         | 1272.5630        | 636.7852         | <b>1271.5790</b> | 636.2932         | I    | 2256.0020        | <b>1128.5046</b> | 2238.9754      | 1119.9913        | 2237.9914        | <b>1119.4993</b> | 21 |
| 12 | <b>1417.6482</b> | 709.3277         | <b>1400.6216</b> | 700.8144         | <b>1399.6376</b> | 700.3224         | Q    | 2142.9179        | <b>1071.9626</b> | 2125.8913      | 1063.4493        | 2124.9073        | 1062.9573        | 20 |
| 13 | <b>1577.6788</b> | 789.3430         | 1560.6523        | 780.8298         | 1559.6683        | 780.3378         | C    | 2014.8593        | <b>1007.9333</b> | 1997.8328      | 999.4200         | 1996.8488        | 998.9280         | 19 |
| 14 | <b>1692.7058</b> | 846.8565         | 1675.6792        | <b>838.3432</b>  | <b>1674.6952</b> | <b>837.8512</b>  | D    | 1854.8287        | <b>927.9180</b>  | 1837.8021      | 919.4047         | 1836.8181        | 918.9127         | 18 |
| 15 | <b>1779.7378</b> | 890.3725         | 1762.7112        | 881.8593         | 1761.7272        | 881.3672         | S    | 1739.8017        | 870.4045         | 1722.7752      | <b>861.8912</b>  | 1721.7912        | <b>861.3992</b>  | 17 |
| 16 | 1836.7593        | 918.8833         | 1819.7327        | 910.3700         | 1818.7487        | 909.8780         | G    | 1652.7697        | 826.8885         | 1635.7431      | 818.3752         | 1634.7591        | 817.8832         | 16 |
| 17 | <b>1999.8226</b> | 1000.4149        | 1982.7960        | 991.9017         | <b>1981.8120</b> | 991.4096         | Y    | 1595.7482        | <b>798.3778</b>  | 1578.7217      | 789.8645         | <b>1577.7377</b> | 789.3725         | 15 |
| 18 | 2056.8440        | 1028.9257        | 2039.8175        | 1020.4124        | 2038.8335        | 1019.9204        | G    | 1432.6849        | <b>716.8461</b>  | 1415.6584      | 708.3328         | 1414.6743        | 707.8408         | 14 |
| 19 | 2155.9125        | <b>1078.4599</b> | 2138.8859        | 1069.9466        | 2137.9019        | 1069.4546        | V    | 1375.6634        | 688.3354         | 1358.6369      | 679.8221         | 1357.6529        | 679.3301         | 13 |
| 20 | 2254.9809        | <b>1127.9941</b> | 2237.9543        | <b>1119.4808</b> | 2236.9703        | <b>1118.9888</b> | V    | <b>1276.5950</b> | <b>638.8012</b>  | 1259.5685      | 630.2879         | 1258.5845        | 629.7959         | 12 |
| 21 | 2312.0023        | 1156.5048        | 2294.9758        | 1147.9915        | 2293.9918        | 1147.4995        | G    | <b>1177.5266</b> | <b>589.2669</b>  | 1160.5001      | 580.7537         | 1159.5160        | 580.2617         | 11 |
| 22 | 2409.0551        | 1205.0312        | 2392.0286        | 1196.5179        | 2391.0445        | 1196.0259        | P    | 1120.5051        | 560.7562         | 1103.4786      | 552.2429         | 1102.4946        | 551.7509         | 10 |



|    |           |           |           |           |           |           |   |           |          |           |          |           |          |   |
|----|-----------|-----------|-----------|-----------|-----------|-----------|---|-----------|----------|-----------|----------|-----------|----------|---|
| 23 | 2537.1137 | 1269.0605 | 2520.0871 | 1260.5472 | 2519.1031 | 1260.0552 | Q | 1023.4524 | 512.2298 | 1006.4258 | 503.7166 | 1005.4418 | 503.2245 | 9 |
| 24 | 2624.1457 | 1312.5765 | 2607.1192 | 1304.0632 | 2606.1351 | 1303.5712 | S | 895.3938  | 448.2005 | 878.3673  | 439.6873 | 877.3832  | 439.1953 | 8 |
| 25 | 2737.2298 | 1369.1185 | 2720.2032 | 1360.6052 | 2719.2192 | 1360.1132 | I | 808.3618  | 404.6845 | 791.3352  | 396.1713 | 790.3512  | 395.6792 | 7 |
| 26 | 2838.2774 | 1419.6424 | 2821.2509 | 1411.1291 | 2820.2669 | 1410.6371 | T | 695.2777  | 348.1425 | 678.2512  | 339.6292 | 677.2671  | 339.1372 | 6 |
| 27 | 2998.3081 | 1499.6577 | 2981.2815 | 1491.1444 | 2980.2975 | 1490.6524 | C | 594.2300  | 297.6187 | 577.2035  | 289.1054 | 576.2195  | 288.6134 | 5 |
| 28 | 3085.3401 | 1543.1737 | 3068.3136 | 1534.6604 | 3067.3296 | 1534.1684 | S | 434.1994  | 217.6033 | 417.1728  | 209.0901 | 416.1888  | 208.5980 | 4 |
| 29 | 3142.3616 | 1571.6844 | 3125.3350 | 1563.1712 | 3124.3510 | 1562.6792 | G | 347.1674  | 174.0873 | 330.1408  | 165.5740 |           |          | 3 |
| 30 | 3257.3885 | 1629.1979 | 3240.3620 | 1620.6846 | 3239.3780 | 1620.1926 | N | 290.1459  | 145.5766 | 273.1193  | 137.0633 |           |          | 2 |
| 31 |           |           |           |           |           |           | R | 175.1190  | 88.0631  | 158.0924  | 79.5498  |           |          | 1 |

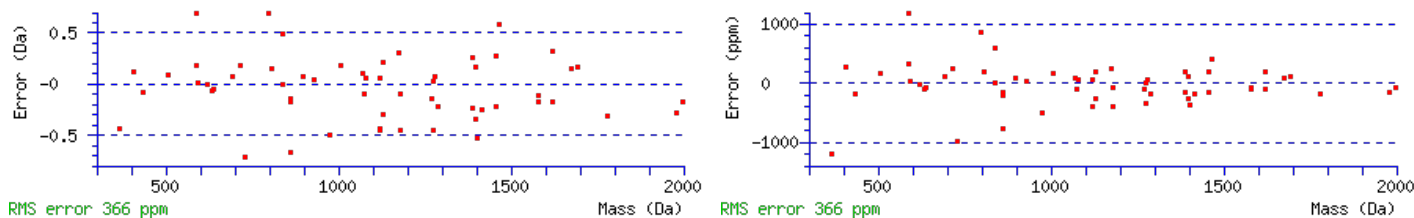

NCBI BLAST search of [DQYVEPENVTIQCDSGYGVVGPQSITCSGNR](#)  
 (Parameters: blastp, nr protein database, expect=20000, no filter, PAM30)  
 Other BLAST [web gateways](#)

All matches to this query

| Score | Mr(calc)  | Delta  | Sequence                                        | Site Analysis             |
|-------|-----------|--------|-------------------------------------------------|---------------------------|
| 77.7  | 3430.4929 | 0.0109 | <a href="#">DQYVEPENVTIQCDSGYGVVGPQSITCSGNR</a> | Deamidated N8, N30 96.14% |
| 61.7  | 3430.4929 | 0.0109 | <a href="#">DQYVEPENVTIQCDSGYGVVGPQSITCSGNR</a> | Deamidated Q12, N30 2.40% |
| 57.0  | 3429.5089 | 0.9949 | <a href="#">DQYVEPENVTIQCDSGYGVVGPQSITCSGNR</a> |                           |
| 55.6  | 3430.4929 | 0.0109 | <a href="#">DQYVEPENVTIQCDSGYGVVGPQSITCSGNR</a> | Deamidated N8, Q23 0.59%  |
| 53.9  | 3430.4929 | 0.0109 | <a href="#">DQYVEPENVTIQCDSGYGVVGPQSITCSGNR</a> | Deamidated Q2, N30 0.40%  |
| 52.8  | 3430.4929 | 0.0109 | <a href="#">DQYVEPENVTIQCDSGYGVVGPQSITCSGNR</a> | Deamidated Q23, N30 0.31% |
| 49.9  | 3429.5089 | 0.9949 | <a href="#">DQYVEPENVTIQCDSGYGVVGPQSITCSGNR</a> |                           |
| 48.5  | 3430.4929 | 0.0109 | <a href="#">DQYVEPENVTIQCDSGYGVVGPQSITCSGNR</a> | Deamidated Q12, Q23 0.12% |
| 41.7  | 3429.5089 | 0.9949 | <a href="#">DQYVEPENVTIQCDSGYGVVGPQSITCSGNR</a> |                           |
| 39.9  | 3429.5089 | 0.9949 | <a href="#">DQYVEPENVTIQCDSGYGVVGPQSITCSGNR</a> |                           |

Mascot: <http://www.matrixscience.com/>

# MATRIX SCIENCE Mascot Search Results

## Peptide View

MS/MS Fragmentation of **LSVDKDQYVEPENVTIQCDSGYGVVGPQSITCSGNR**

Found in **P04003** in **con\_Xuniprot\_HUMAN3**, C4BPA\_HUMAN C4b-binding protein alpha chain OS=Homo sapiens GN=C4BPA PE=1 SV=2

Match to Query 28253: 3973.836762 from(1325.619530,3+) intensity(17220.0371) rtinseconds(1664) scans(4158) index(3816)

Title: 111019\_Est\_ISCardio\_NMI\_YP\_G\_6Spectrum3414\_scans\_\_4158

Data file C:\mascot\20140703\_Tmgf\_1D\CSV\_UseAnalysis\MasterCSV\All\_Glyco\mgf\ptm\UC18ERLIC\_PTM\_35D.mgf

Click mouse within plot area to zoom in by factor of two about that point

Or, to Da

Label all possible matches Label matches used for scoring

Show Y-axis

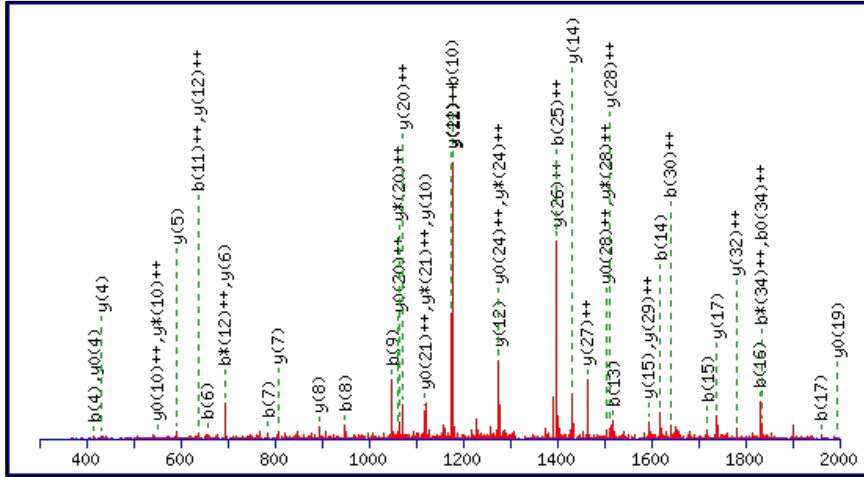

Monoisotopic mass of neutral peptide Mr(calc): 3971.8154

Fixed modifications: Carbamidomethyl (C) (apply to specified residues or termini only)

Variable modifications:

N13 : Deamidated (NQ)

Ions Score: 75 Expect: 5.3e-006

Matches : 48/404 fragment ions using 68 most intense peaks ([help](#))

| #  | b                | b <sup>++</sup> | b <sup>*</sup> | b <sup>*++</sup> | b <sup>0</sup> | b <sup>0++</sup> | Seq. | y                | y <sup>++</sup>  | y <sup>*</sup> | y <sup>*++</sup> | y <sup>0</sup>   | y <sup>0++</sup> | #  |
|----|------------------|-----------------|----------------|------------------|----------------|------------------|------|------------------|------------------|----------------|------------------|------------------|------------------|----|
| 1  | 114.0913         | 57.5493         |                |                  |                |                  | L    |                  |                  |                |                  |                  |                  | 36 |
| 2  | 201.1234         | 101.0653        |                |                  | 183.1128       | 92.0600          | S    | 3859.7385        | 1930.3729        | 3842.7120      | 1921.8596        | 3841.7280        | 1921.3676        | 35 |
| 3  | 300.1918         | 150.5995        |                |                  | 282.1812       | 141.5942         | V    | 3772.7065        | 1886.8569        | 3755.6800      | 1878.3436        | 3754.6959        | 1877.8516        | 34 |
| 4  | <b>415.2187</b>  | 208.1130        |                |                  | 397.2082       | 199.1077         | D    | 3673.6381        | 1837.3227        | 3656.6116      | 1828.8094        | 3655.6275        | 1828.3174        | 33 |
| 5  | 543.3137         | 272.1605        | 526.2871       | 263.6472         | 525.3031       | 263.1552         | K    | 3558.6112        | <b>1779.8092</b> | 3541.5846      | 1771.2959        | 3540.6006        | 1770.8039        | 32 |
| 6  | <b>658.3406</b>  | 329.6740        | 641.3141       | 321.1607         | 640.3301       | 320.6687         | D    | 3430.5162        | 1715.7617        | 3413.4896      | 1707.2485        | 3412.5056        | 1706.7565        | 31 |
| 7  | <b>786.3992</b>  | 393.7032        | 769.3727       | 385.1900         | 768.3886       | 384.6980         | Q    | 3315.4893        | 1658.2483        | 3298.4627      | 1649.7350        | 3297.4787        | 1649.2430        | 30 |
| 8  | <b>949.4625</b>  | 475.2349        | 932.4360       | 466.7216         | 931.4520       | 466.2296         | Y    | 3187.4307        | <b>1594.2190</b> | 3170.4041      | 1585.7057        | 3169.4201        | 1585.2137        | 29 |
| 9  | <b>1048.5310</b> | 524.7691        | 1031.5044      | 516.2558         | 1030.5204      | 515.7638         | V    | 3024.3673        | <b>1512.6873</b> | 3007.3408      | <b>1504.1740</b> | 3006.3568        | <b>1503.6820</b> | 28 |
| 10 | <b>1177.5735</b> | 589.2904        | 1160.5470      | 580.7771         | 1159.5630      | 580.2851         | E    | 2925.2989        | <b>1463.1531</b> | 2908.2724      | 1454.6398        | 2907.2884        | 1454.1478        | 27 |
| 11 | 1274.6263        | <b>637.8168</b> | 1257.5998      | 629.3035         | 1256.6157      | 628.8115         | P    | 2796.2563        | <b>1398.6318</b> | 2779.2298      | 1390.1185        | 2778.2458        | 1389.6265        | 26 |
| 12 | 1403.6689        | 702.3381        | 1386.6424      | <b>693.8248</b>  | 1385.6583      | 693.3328         | E    | 2699.2036        | 1350.1054        | 2682.1770      | 1341.5921        | 2681.1930        | 1341.1001        | 25 |
| 13 | <b>1518.6958</b> | 759.8516        | 1501.6693      | 751.3383         | 1500.6853      | 750.8463         | N    | 2570.1610        | 1285.5841        | 2553.1344      | <b>1277.0709</b> | 2552.1504        | <b>1276.5788</b> | 24 |
| 14 | <b>1617.7643</b> | 809.3858        | 1600.7377      | 800.8725         | 1599.7537      | 800.3805         | V    | 2455.1340        | 1228.0707        | 2438.1075      | 1219.5574        | 2437.1235        | 1219.0654        | 23 |
| 15 | <b>1718.8119</b> | 859.9096        | 1701.7854      | 851.3963         | 1700.8014      | 850.9043         | T    | 2356.0656        | <b>1178.5364</b> | 2339.0391      | 1170.0232        | 2338.0551        | 1169.5312        | 22 |
| 16 | <b>1831.8960</b> | 916.4516        | 1814.8695      | 907.9384         | 1813.8854      | 907.4464         | I    | 2255.0179        | 1128.0126        | 2237.9914      | <b>1119.4993</b> | 2237.0074        | <b>1119.0073</b> | 21 |
| 17 | <b>1959.9546</b> | 980.4809        | 1942.9280      | 971.9677         | 1941.9440      | 971.4756         | Q    | 2141.9339        | <b>1071.4706</b> | 2124.9073      | <b>1062.9573</b> | 2123.9233        | <b>1062.4653</b> | 20 |
| 18 | 2119.9852        | 1060.4963       | 2102.9587      | 1051.9830        | 2101.9747      | 1051.4910        | C    | 2013.8753        | 1007.4413        | 1996.8488      | 998.9280         | <b>1995.8647</b> | 998.4360         | 19 |
| 19 | 2235.0122        | 1118.0097       | 2217.9856      | 1109.4964        | 2217.0016      | 1109.0044        | D    | 1853.8447        | 927.4260         | 1836.8181      | 918.9127         | 1835.8341        | 918.4207         | 18 |
| 20 | 2322.0442        | 1161.5257       | 2305.0177      | 1153.0125        | 2304.0336      | 1152.5205        | S    | <b>1738.8177</b> | 869.9125         | 1721.7912      | 861.3992         | 1720.8071        | 860.9072         | 17 |
| 21 | 2379.0657        | 1190.0365       | 2362.0391      | 1181.5232        | 2361.0551      | 1181.0312        | G    | 1651.7857        | 826.3965         | 1634.7591      | 817.8832         | 1633.7751        | 817.3912         | 16 |
| 22 | 2542.1290        | 1271.5681       | 2525.1024      | 1263.0549        | 2524.1184      | 1262.5629        | Y    | <b>1594.7642</b> | 797.8857         | 1577.7377      | 789.3725         | 1576.7537        | 788.8805         | 15 |
| 23 | 2599.1505        | 1300.0789       | 2582.1239      | 1291.5656        | 2581.1399      | 1291.0736        | G    | <b>1431.7009</b> | 716.3541         | 1414.6743      | 707.8408         | 1413.6903        | 707.3488         | 14 |



|    |           |           |           |           |           |           |   |           |          |           |          |           |          |    |
|----|-----------|-----------|-----------|-----------|-----------|-----------|---|-----------|----------|-----------|----------|-----------|----------|----|
| 24 | 2698.2189 | 1349.6131 | 2681.1923 | 1341.0998 | 2680.2083 | 1340.6078 | V | 1374.6794 | 687.8434 | 1357.6529 | 679.3301 | 1356.6689 | 678.8381 | 13 |
| 25 | 2797.2873 | 1399.1473 | 2780.2607 | 1390.6340 | 2779.2767 | 1390.1420 | V | 1275.6110 | 638.3091 | 1258.5845 | 629.7959 | 1257.6004 | 629.3039 | 12 |
| 26 | 2854.3087 | 1427.6580 | 2837.2822 | 1419.1447 | 2836.2982 | 1418.6527 | G | 1176.5426 | 588.7749 | 1159.5160 | 580.2617 | 1158.5320 | 579.7697 | 11 |
| 27 | 2951.3615 | 1476.1844 | 2934.3350 | 1467.6711 | 2933.3509 | 1467.1791 | P | 1119.5211 | 560.2642 | 1102.4946 | 551.7509 | 1101.5106 | 551.2589 | 10 |
| 28 | 3079.4201 | 1540.2137 | 3062.3935 | 1531.7004 | 3061.4095 | 1531.2084 | Q | 1022.4684 | 511.7378 | 1005.4418 | 503.2245 | 1004.4578 | 502.7325 | 9  |
| 29 | 3166.4521 | 1583.7297 | 3149.4256 | 1575.2164 | 3148.4416 | 1574.7244 | S | 894.4098  | 447.7085 | 877.3832  | 439.1953 | 876.3992  | 438.7033 | 8  |
| 30 | 3279.5362 | 1640.2717 | 3262.5096 | 1631.7585 | 3261.5256 | 1631.2664 | I | 807.3778  | 404.1925 | 790.3512  | 395.6792 | 789.3672  | 395.1872 | 7  |
| 31 | 3380.5839 | 1690.7956 | 3363.5573 | 1682.2823 | 3362.5733 | 1681.7903 | T | 694.2937  | 347.6505 | 677.2671  | 339.1372 | 676.2831  | 338.6452 | 6  |
| 32 | 3540.6145 | 1770.8109 | 3523.5880 | 1762.2976 | 3522.6039 | 1761.8056 | C | 593.2460  | 297.1266 | 576.2195  | 288.6134 | 575.2355  | 288.1214 | 5  |
| 33 | 3627.6465 | 1814.3269 | 3610.6200 | 1805.8136 | 3609.6360 | 1805.3216 | S | 433.2154  | 217.1113 | 416.1888  | 208.5980 | 415.2048  | 208.1060 | 4  |
| 34 | 3684.6680 | 1842.8376 | 3667.6415 | 1834.3244 | 3666.6574 | 1833.8324 | G | 346.1833  | 173.5953 | 329.1568  | 165.0820 |           |          | 3  |
| 35 | 3798.7109 | 1899.8591 | 3781.6844 | 1891.3458 | 3780.7004 | 1890.8538 | N | 289.1619  | 145.0846 | 272.1353  | 136.5713 |           |          | 2  |
| 36 |           |           |           |           |           |           | R | 175.1190  | 88.0631  | 158.0924  | 79.5498  |           |          | 1  |

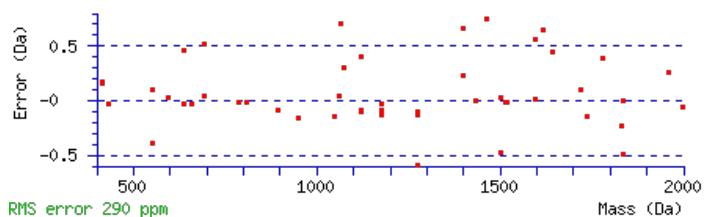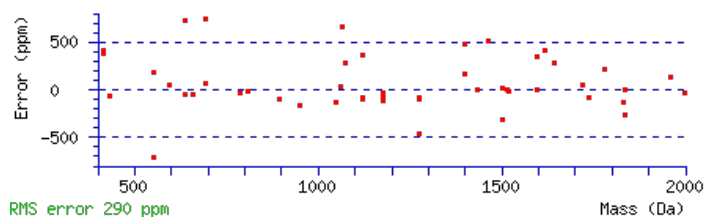

NCBI BLAST search of [LSVDKDQYVEPENVTIQCDSGYGVVGPQSITCSG NR](#)

(Parameters: blastp, nr protein database, expect=20000, no filter, PAM30)

Other BLAST [web gateways](#)

All matches to this query

| Score | Mr(calc)  | Delta   | Sequence                                              | Site Analysis         |
|-------|-----------|---------|-------------------------------------------------------|-----------------------|
| 75.2  | 3971.8154 | 2.0214  | <a href="#">LSVDKDQYVEPENVTIQCDSGYGVVGPQSITCSG NR</a> | Deamidated N13 85.29% |
| 64.4  | 3971.8154 | 2.0214  | <a href="#">LSVDKDQYVEPENVTIQCDSGYGVVGPQSITCSG NR</a> | Deamidated Q7 7.21%   |
| 63.5  | 3971.8154 | 2.0214  | <a href="#">LSVDKDQYVEPENVTIQCDSGYGVVGPQSITCSG NR</a> | Deamidated Q17 5.79%  |
| 57.6  | 3971.8154 | 2.0214  | <a href="#">LSVDKDQYVEPENVTIQCDSGYGVVGPQSITCSG NR</a> | Deamidated Q28 1.49%  |
| 49.4  | 3971.8154 | 2.0214  | <a href="#">LSVDKDQYVEPENVTIQCDSGYGVVGPQSITCSG NR</a> | Deamidated N35 0.23%  |
| 6.2   | 3973.8437 | -0.0069 | <a href="#">YETPEGEVMSPRQKWMHSLPNDWIMENPVLHR</a>      |                       |
| 3.9   | 3971.8451 | 1.9917  | <a href="#">YTAGTPYKVPPTQSNTAPPPYSPSPNPYQTAMYPIR</a>  |                       |
| 3.4   | 3972.8420 | 0.9948  | <a href="#">NGSLVWGMVCGQNWGIVEAMVVCROGLGLGFASNAFQ</a> |                       |
| 3.3   | 3973.8475 | -0.0108 | <a href="#">TYWQFLSGVTPLNEGVADYIPFNHEHITANFTQY</a>    |                       |
| 2.8   | 3973.8475 | -0.0108 | <a href="#">TYWQFLSGVTPLNEGVADYIPFNHEHITANFTQY</a>    |                       |

Mascot: <http://www.matrixscience.com/>

# MASCOT SCIENCE Mascot Search Results

## Peptide View

MS/MS Fragmentation of **LSVDKDQYVEPENVTIQCDSGYGVVGPQSITCSG NR**

Found in **P04003** in **con\_Xuniprot\_HUMAN3**, C4BPA\_HUMAN C4b-binding protein alpha chain OS=Homo sapiens GN=C4BPA PE=1 SV=2

Match to Query 28249: 3972.835092 from(1325.285640,3+) intensity(0.0000) rtinseconds(1608) scans(4098) index(15844)

Title: 111019\_Est\_MI\_YP\_G\_05Spectrum3491\_scans\_\_4098

Data file C:\mascot\20140703\_Tmgf\_1D\CSV\_UseAnalysis\MasterCSV\All\_Glyco\mgf\ptm\UC18ERLIC\_PTM\_35D.mgf

Click mouse within plot area to zoom in by factor of two about that point

Or, to Da

Label all possible matches Label matches used for scoring

Show Y-axis

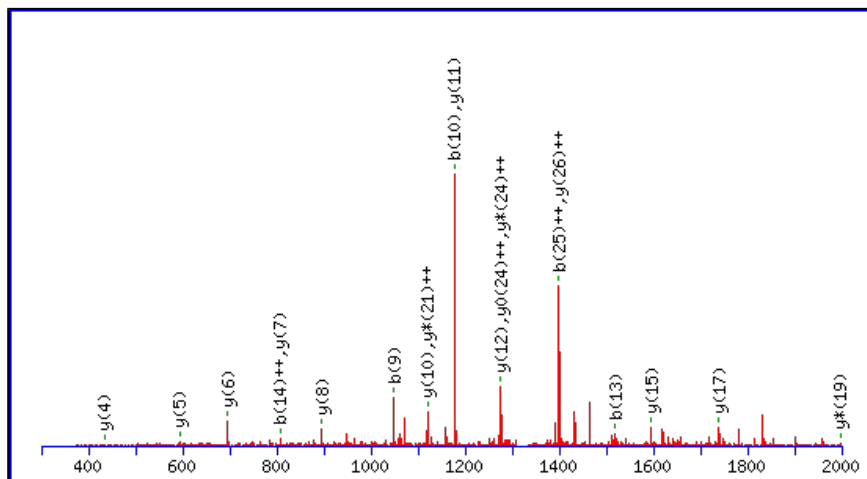

Monoisotopic mass of neutral peptide Mr(calc): 3971.8154

Fixed modifications: Carbamidomethyl (C) (apply to specified residues or termini only)

Variable modifications:

N35 : Deamidated (NQ)

Ions Score: 69 Expect: 2.1e-005

Matches : 20/404 fragment ions using 17 most intense peaks ([help](#))

| #  | b                | b <sup>++</sup> | b <sup>*</sup> | b <sup>*++</sup> | b <sup>0</sup> | b <sup>0++</sup> | Seq. | y                | y <sup>++</sup>  | y <sup>*</sup>   | y <sup>*++</sup> | y <sup>0</sup> | y <sup>0++</sup> | #  |
|----|------------------|-----------------|----------------|------------------|----------------|------------------|------|------------------|------------------|------------------|------------------|----------------|------------------|----|
| 1  | 114.0913         | 57.5493         |                |                  |                |                  | L    |                  |                  |                  |                  |                |                  | 36 |
| 2  | 201.1234         | 101.0653        |                |                  | 183.1128       | 92.0600          | S    | 3859.7385        | 1930.3729        | 3842.7120        | 1921.8596        | 3841.7280      | 1921.3676        | 35 |
| 3  | 300.1918         | 150.5995        |                |                  | 282.1812       | 141.5942         | V    | 3772.7065        | 1886.8569        | 3755.6800        | 1878.3436        | 3754.6959      | 1877.8516        | 34 |
| 4  | 415.2187         | 208.1130        |                |                  | 397.2082       | 199.1077         | D    | 3673.6381        | 1837.3227        | 3656.6116        | 1828.8094        | 3655.6275      | 1828.3174        | 33 |
| 5  | 543.3137         | 272.1605        | 526.2871       | 263.6472         | 525.3031       | 263.1552         | K    | 3558.6112        | 1779.8092        | 3541.5846        | 1771.2959        | 3540.6006      | 1770.8039        | 32 |
| 6  | 658.3406         | 329.6740        | 641.3141       | 321.1607         | 640.3301       | 320.6687         | D    | 3430.5162        | 1715.7617        | 3413.4896        | 1707.2485        | 3412.5056      | 1706.7565        | 31 |
| 7  | 786.3992         | 393.7032        | 769.3727       | 385.1900         | 768.3886       | 384.6980         | Q    | 3315.4893        | 1658.2483        | 3298.4627        | 1649.7350        | 3297.4787      | 1649.2430        | 30 |
| 8  | 949.4625         | 475.2349        | 932.4360       | 466.7216         | 931.4520       | 466.2296         | Y    | 3187.4307        | 1594.2190        | 3170.4041        | 1585.7057        | 3169.4201      | 1585.2137        | 29 |
| 9  | <b>1048.5310</b> | 524.7691        | 1031.5044      | 516.2558         | 1030.5204      | 515.7638         | V    | 3024.3673        | 1512.6873        | 3007.3408        | 1504.1740        | 3006.3568      | 1503.6820        | 28 |
| 10 | <b>1177.5735</b> | 589.2904        | 1160.5470      | 580.7771         | 1159.5630      | 580.2851         | E    | 2925.2989        | 1463.1531        | 2908.2724        | 1454.6398        | 2907.2884      | 1454.1478        | 27 |
| 11 | 1274.6263        | 637.8168        | 1257.5998      | 629.3035         | 1256.6157      | 628.8115         | P    | 2796.2563        | <b>1398.6318</b> | 2779.2298        | 1390.1185        | 2778.2458      | 1389.6265        | 26 |
| 12 | 1403.6689        | 702.3381        | 1386.6424      | 693.8248         | 1385.6583      | 693.3328         | E    | 2699.2036        | 1350.1054        | 2682.1770        | 1341.5921        | 2681.1930      | 1341.1001        | 25 |
| 13 | <b>1517.7118</b> | 759.3596        | 1500.6853      | 750.8463         | 1499.7013      | 750.3543         | N    | 2570.1610        | 1285.5841        | 2553.1344        | <b>1277.0709</b> | 2552.1504      | <b>1276.5788</b> | 24 |
| 14 | 1616.7802        | <b>808.8938</b> | 1599.7537      | 800.3805         | 1598.7697      | 799.8885         | V    | 2456.1181        | 1228.5627        | 2439.0915        | 1220.0494        | 2438.1075      | 1219.5574        | 23 |
| 15 | 1717.8279        | 859.4176        | 1700.8014      | 850.9043         | 1699.8174      | 850.4123         | T    | 2357.0496        | 1179.0285        | 2340.0231        | 1170.5152        | 2339.0391      | 1170.0232        | 22 |
| 16 | 1830.9120        | 915.9596        | 1813.8854      | 907.4464         | 1812.9014      | 906.9543         | I    | 2256.0020        | 1128.5046        | 2238.9754        | <b>1119.9913</b> | 2237.9914      | 1119.4993        | 21 |
| 17 | 1958.9706        | 979.9889        | 1941.9440      | 971.4756         | 1940.9600      | 970.9836         | Q    | 2142.9179        | 1071.9626        | 2125.8913        | 1063.4493        | 2124.9073      | 1062.9573        | 20 |
| 18 | 2119.0012        | 1060.0042       | 2101.9747      | 1051.4910        | 2100.9906      | 1050.9990        | C    | 2014.8593        | 1007.9333        | <b>1997.8328</b> | 999.4200         | 1996.8488      | 998.9280         | 19 |
| 19 | 2234.0282        | 1117.5177       | 2217.0016      | 1109.0044        | 2216.0176      | 1108.5124        | D    | 1854.8287        | 927.9180         | 1837.8021        | 919.4047         | 1836.8181      | 918.9127         | 18 |
| 20 | 2321.0602        | 1161.0337       | 2304.0336      | 1152.5205        | 2303.0496      | 1152.0284        | S    | <b>1739.8017</b> | 870.4045         | 1722.7752        | 861.8912         | 1721.7912      | 861.3992         | 17 |
| 21 | 2378.0816        | 1189.5445       | 2361.0551      | 1181.0312        | 2360.0711      | 1180.5392        | G    | 1652.7697        | 826.8885         | 1635.7431        | 818.3752         | 1634.7591      | 817.8832         | 16 |
| 22 | 2541.1450        | 1271.0761       | 2524.1184      | 1262.5629        | 2523.1344      | 1262.0708        | Y    | <b>1595.7482</b> | 798.3778         | 1578.7217        | 789.8645         | 1577.7377      | 789.3725         | 15 |
| 23 | 2598.1664        | 1299.5869       | 2581.1399      | 1291.0736        | 2580.1559      | 1290.5816        | G    | 1432.6849        | 716.8461         | 1415.6584        | 708.3328         | 1414.6743      | 707.8408         | 14 |

|    |           |           |           |           |           |           |   |           |          |           |          |           |          |    |
|----|-----------|-----------|-----------|-----------|-----------|-----------|---|-----------|----------|-----------|----------|-----------|----------|----|
| 24 | 2697.2349 | 1349.1211 | 2680.2083 | 1340.6078 | 2679.2243 | 1340.1158 | V | 1375.6634 | 688.3354 | 1358.6369 | 679.8221 | 1357.6529 | 679.3301 | 13 |
| 25 | 2796.3033 | 1398.6553 | 2779.2767 | 1390.1420 | 2778.2927 | 1389.6500 | V | 1276.5950 | 638.8012 | 1259.5685 | 630.2879 | 1258.5845 | 629.7959 | 12 |
| 26 | 2853.3247 | 1427.1660 | 2836.2982 | 1418.6527 | 2835.3142 | 1418.1607 | G | 1177.5266 | 589.2669 | 1160.5001 | 580.7537 | 1159.5160 | 580.2617 | 11 |
| 27 | 2950.3775 | 1475.6924 | 2933.3509 | 1467.1791 | 2932.3669 | 1466.6871 | P | 1120.5051 | 560.7562 | 1103.4786 | 552.2429 | 1102.4946 | 551.7509 | 10 |
| 28 | 3078.4361 | 1539.7217 | 3061.4095 | 1531.2084 | 3060.4255 | 1530.7164 | Q | 1023.4524 | 512.2298 | 1006.4258 | 503.7166 | 1005.4418 | 503.2245 | 9  |
| 29 | 3165.4681 | 1583.2377 | 3148.4416 | 1574.7244 | 3147.4575 | 1574.2324 | S | 895.3938  | 448.2005 | 878.3673  | 439.6873 | 877.3832  | 439.1953 | 8  |
| 30 | 3278.5522 | 1639.7797 | 3261.5256 | 1631.2664 | 3260.5416 | 1630.7744 | I | 808.3618  | 404.6845 | 791.3352  | 396.1713 | 790.3512  | 395.6792 | 7  |
| 31 | 3379.5998 | 1690.3036 | 3362.5733 | 1681.7903 | 3361.5893 | 1681.2983 | T | 695.2777  | 348.1425 | 678.2512  | 339.6292 | 677.2671  | 339.1372 | 6  |
| 32 | 3539.6305 | 1770.3189 | 3522.6039 | 1761.8056 | 3521.6199 | 1761.3136 | C | 594.2300  | 297.6187 | 577.2035  | 289.1054 | 576.2195  | 288.6134 | 5  |
| 33 | 3626.6625 | 1813.8349 | 3609.6360 | 1805.3216 | 3608.6520 | 1804.8296 | S | 434.1994  | 217.6033 | 417.1728  | 209.0901 | 416.1888  | 208.5980 | 4  |
| 34 | 3683.6840 | 1842.3456 | 3666.6574 | 1833.8324 | 3665.6734 | 1833.3403 | G | 347.1674  | 174.0873 | 330.1408  | 165.5740 |           |          | 3  |
| 35 | 3798.7109 | 1899.8591 | 3781.6844 | 1891.3458 | 3780.7004 | 1890.8538 | N | 290.1459  | 145.5766 | 273.1193  | 137.0633 |           |          | 2  |
| 36 |           |           |           |           |           |           | R | 175.1190  | 88.0631  | 158.0924  | 79.5498  |           |          | 1  |

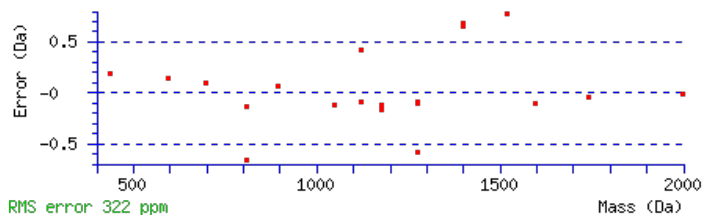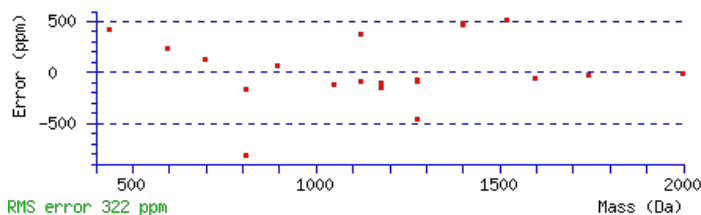

NCBI BLAST search of [LSVDKDQYVEPENVTIQCDSGYGVVGPQSITCSGNR](#)

(Parameters: blastp, nr protein database, expect=20000, no filter, PAM30)

Other BLAST [web gateways](#)

All matches to this query

| Score | Mr(calc)  | Delta   | Sequence                                               | Site Analysis         |
|-------|-----------|---------|--------------------------------------------------------|-----------------------|
| 69.3  | 3971.8154 | 1.0197  | <a href="#">LSVDKDQYVEPENVTIQCDSGYGVVGPQSITCSGNR</a>   | Deamidated N35 99.57% |
| 44.6  | 3971.8154 | 1.0197  | <a href="#">LSVDKDQYVEPENVTIQCDSGYGVVGPQSITCSGNR</a>   | Deamidated Q28 0.34%  |
| 36.3  | 3971.8154 | 1.0197  | <a href="#">LSVDKDQYVEPENVTIQCDSGYGVVGPQSITCSGNR</a>   | Deamidated N13 0.05%  |
| 34.6  | 3971.8154 | 1.0197  | <a href="#">LSVDKDQYVEPENVTIQCDSGYGVVGPQSITCSGNR</a>   | Deamidated Q17 0.03%  |
| 14.8  | 3970.8313 | 2.0037  | <a href="#">LSVDKDQYVEPENVTIQCDSGYGVVGPQSITCSGNR</a>   |                       |
| 14.5  | 3971.8154 | 1.0197  | <a href="#">LSVDKDQYVEPENVTIQCDSGYGVVGPQSITCSGNR</a>   | Deamidated Q7 0.00%   |
| 9.9   | 3970.8282 | 2.0069  | <a href="#">LGSDDFFYVGGSPSTADLPGSPVSNFMGCLKEVVYK</a>   |                       |
| 9.9   | 3970.8282 | 2.0069  | <a href="#">LGSDDFFYVGGSPSTADLPGSPVSNFMGCLKEVVYK</a>   |                       |
| 9.3   | 3972.8420 | -0.0069 | <a href="#">NGSLVWGMVCGQNWGWIVEAMVVCROQLGLGFASNAFQ</a> |                       |
| 7.6   | 3970.8126 | 2.0225  | <a href="#">YQGSSVSNLHVPCGTNTHASSLOHENSLLLTKDR</a>     |                       |

Mascot: <http://www.matrixscience.com/>

# MATRIX SCIENCE Mascot Search Results

## Peptide View

MS/MS Fragmentation of **DQYVEPENVTIQDSGYGVVGPQSITCSGNR**

Found in **P04003** in **con\_Xuniprot\_HUMAN3**, C4BPA\_HUMAN C4b-binding protein alpha chain OS=Homo sapiens GN=C4BPA PE=1 SV=2

Match to Query 27715: 3429.515622 from(1144.179150,3+) intensity(17205.7773) rtinseconds(1655) scans(4134) index(3812)

Title: 111019\_Est\_ISCardio\_NMI\_YP\_G\_6Spectrum3394\_scans\_4134

Data file C:\mascot\20140703\_Tmgf\_1D\CSV\_UseAnalysis\MasterCSV\All\_Glyco\mgf\ptm\UC18ERLIC\_PTM\_35D.mgf

Click mouse within plot area to zoom in by factor of two about that point

Or, to Da

Label all possible matches Label matches used for scoring

Show Y-axis

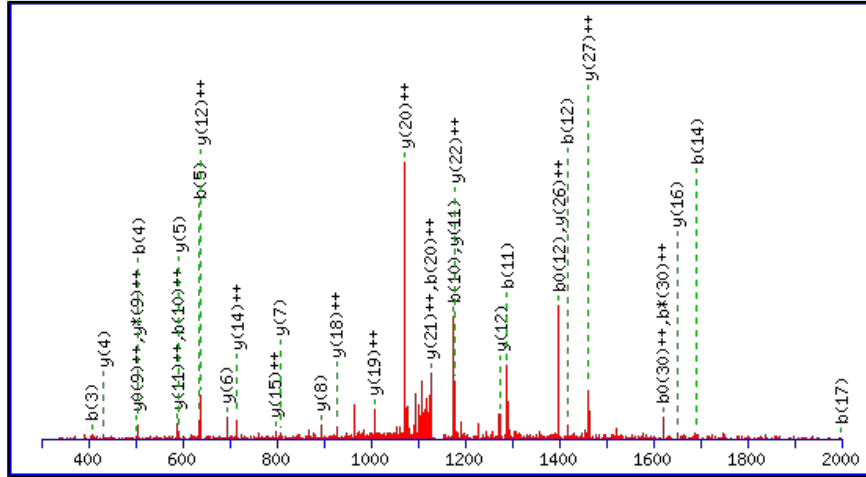

Monoisotopic mass of neutral peptide Mr(calc): 3429.5089

Fixed modifications: Carbamidomethyl (C) (apply to specified residues or termini only)

Variable modifications:

N8 : Deamidated (NQ)

Ions Score: 66 Expect: 2.9e-005

Matches : 34/352 fragment ions using 51 most intense peaks ([help](#))

| #  | b                | b <sup>++</sup>  | b <sup>*</sup> | b <sup>*++</sup> | b <sup>0</sup>   | b <sup>0++</sup> | Seq. | y                | y <sup>++</sup>  | y <sup>*</sup> | y <sup>*++</sup> | y <sup>0</sup> | y <sup>0++</sup> | #  |
|----|------------------|------------------|----------------|------------------|------------------|------------------|------|------------------|------------------|----------------|------------------|----------------|------------------|----|
| 1  | 116.0342         | 58.5207          |                |                  | 98.0237          | 49.5155          | D    |                  |                  |                |                  |                |                  | 31 |
| 2  | 244.0928         | 122.5500         | 227.0662       | 114.0368         | 226.0822         | 113.5448         | Q    | 3315.4893        | 1658.2483        | 3298.4627      | 1649.7350        | 3297.4787      | 1649.2430        | 30 |
| 3  | <b>407.1561</b>  | 204.0817         | 390.1296       | 195.5684         | 389.1456         | 195.0764         | Y    | 3187.4307        | 1594.2190        | 3170.4041      | 1585.7057        | 3169.4201      | 1585.2137        | 29 |
| 4  | <b>506.2245</b>  | 253.6159         | 489.1980       | 245.1026         | 488.2140         | 244.6106         | V    | 3024.3673        | 1512.6873        | 3007.3408      | 1504.1740        | 3006.3568      | 1503.6820        | 28 |
| 5  | <b>635.2671</b>  | 318.1372         | 618.2406       | 309.6239         | 617.2566         | 309.1319         | E    | 2925.2989        | <b>1463.1531</b> | 2908.2724      | 1454.6398        | 2907.2884      | 1454.1478        | 27 |
| 6  | 732.3199         | 366.6636         | 715.2933       | 358.1503         | 714.3093         | 357.6583         | P    | 2796.2563        | <b>1398.6318</b> | 2779.2298      | 1390.1185        | 2778.2458      | 1389.6265        | 26 |
| 7  | 861.3625         | 431.1849         | 844.3359       | 422.6716         | 843.3519         | 422.1796         | E    | 2699.2036        | 1350.1054        | 2682.1770      | 1341.5921        | 2681.1930      | 1341.1001        | 25 |
| 8  | 976.3894         | 488.6984         | 959.3629       | 480.1851         | 958.3789         | 479.6931         | N    | 2570.1610        | 1285.5841        | 2553.1344      | 1277.0709        | 2552.1504      | 1276.5788        | 24 |
| 9  | 1075.4578        | 538.2326         | 1058.4313      | 529.7193         | 1057.4473        | 529.2273         | V    | 2455.1340        | 1228.0707        | 2438.1075      | 1219.5574        | 2437.1235      | 1219.0654        | 23 |
| 10 | <b>1176.5055</b> | <b>588.7564</b>  | 1159.4790      | 580.2431         | 1158.4950        | 579.7511         | T    | 2356.0656        | <b>1178.5364</b> | 2339.0391      | 1170.0232        | 2338.0551      | 1169.5312        | 22 |
| 11 | <b>1289.5896</b> | 645.2984         | 1272.5630      | 636.7852         | 1271.5790        | 636.2932         | I    | 2255.0179        | <b>1128.0126</b> | 2237.9914      | 1119.4993        | 2237.0074      | 1119.0073        | 21 |
| 12 | <b>1417.6482</b> | 709.3277         | 1400.6216      | 700.8144         | <b>1399.6376</b> | 700.3224         | Q    | 2141.9339        | <b>1071.4706</b> | 2124.9073      | 1062.9573        | 2123.9233      | 1062.4653        | 20 |
| 13 | 1577.6788        | 789.3430         | 1560.6523      | 780.8298         | 1559.6683        | 780.3378         | C    | 2013.8753        | <b>1007.4413</b> | 1996.8488      | 998.9280         | 1995.8647      | 998.4360         | 19 |
| 14 | <b>1692.7058</b> | 846.8565         | 1675.6792      | 838.3432         | 1674.6952        | 837.8512         | D    | 1853.8447        | <b>927.4260</b>  | 1836.8181      | 918.9127         | 1835.8341      | 918.4207         | 18 |
| 15 | 1779.7378        | 890.3725         | 1762.7112      | 881.8593         | 1761.7272        | 881.3672         | S    | 1738.8177        | 869.9125         | 1721.7912      | 861.3992         | 1720.8071      | 860.9072         | 17 |
| 16 | 1836.7593        | 918.8833         | 1819.7327      | 910.3700         | 1818.7487        | 909.8780         | G    | <b>1651.7857</b> | 826.3965         | 1634.7591      | 817.8832         | 1633.7751      | 817.3912         | 16 |
| 17 | <b>1999.8226</b> | 1000.4149        | 1982.7960      | 991.9017         | 1981.8120        | 991.4096         | Y    | 1594.7642        | <b>797.8857</b>  | 1577.7377      | 789.3725         | 1576.7537      | 788.8805         | 15 |
| 18 | 2056.8440        | 1028.9257        | 2039.8175      | 1020.4124        | 2038.8335        | 1019.9204        | G    | 1431.7009        | <b>716.3541</b>  | 1414.6743      | 707.8408         | 1413.6903      | 707.3488         | 14 |
| 19 | 2155.9125        | 1078.4599        | 2138.8859      | 1069.9466        | 2137.9019        | 1069.4546        | V    | 1374.6794        | 687.8434         | 1357.6529      | 679.3301         | 1356.6689      | 678.8381         | 13 |
| 20 | 2254.9809        | <b>1127.9941</b> | 2237.9543      | 1119.4808        | 2236.9703        | 1118.9888        | V    | <b>1275.6110</b> | <b>638.3091</b>  | 1258.5845      | 629.7959         | 1257.6004      | 629.3039         | 12 |
| 21 | 2312.0023        | 1156.5048        | 2294.9758      | 1147.9915        | 2293.9918        | 1147.4995        | G    | <b>1176.5426</b> | <b>588.7749</b>  | 1159.5160      | 580.2617         | 1158.5320      | 579.7697         | 11 |
| 22 | 2409.0551        | 1205.0312        | 2392.0286      | 1196.5179        | 2391.0445        | 1196.0259        | P    | 1119.5211        | 560.2642         | 1102.4946      | 551.7509         | 1101.5106      | 551.2589         | 10 |
| 23 | 2537.1137        | 1269.0605        | 2520.0871      | 1260.5472        | 2519.1031        | 1260.0552        | Q    | 1022.4684        | 511.7378         | 1005.4418      | <b>503.2245</b>  | 1004.4578      | <b>502.7325</b>  | 9  |

|    |           |           |           |           |           |           |   |          |          |          |          |          |          |   |
|----|-----------|-----------|-----------|-----------|-----------|-----------|---|----------|----------|----------|----------|----------|----------|---|
| 24 | 2624.1457 | 1312.5765 | 2607.1192 | 1304.0632 | 2606.1351 | 1303.5712 | S | 894.4098 | 447.7085 | 877.3832 | 439.1953 | 876.3992 | 438.7033 | 8 |
| 25 | 2737.2298 | 1369.1185 | 2720.2032 | 1360.6052 | 2719.2192 | 1360.1132 | I | 807.3778 | 404.1925 | 790.3512 | 395.6792 | 789.3672 | 395.1872 | 7 |
| 26 | 2838.2774 | 1419.6424 | 2821.2509 | 1411.1291 | 2820.2669 | 1410.6371 | T | 694.2937 | 347.6505 | 677.2671 | 339.1372 | 676.2831 | 338.6452 | 6 |
| 27 | 2998.3081 | 1499.6577 | 2981.2815 | 1491.1444 | 2980.2975 | 1490.6524 | C | 593.2460 | 297.1266 | 576.2195 | 288.6134 | 575.2355 | 288.1214 | 5 |
| 28 | 3085.3401 | 1543.1737 | 3068.3136 | 1534.6604 | 3067.3296 | 1534.1684 | S | 433.2154 | 217.1113 | 416.1888 | 208.5980 | 415.2048 | 208.1060 | 4 |
| 29 | 3142.3616 | 1571.6844 | 3125.3350 | 1563.1712 | 3124.3510 | 1562.6792 | G | 346.1833 | 173.5953 | 329.1568 | 165.0820 |          |          | 3 |
| 30 | 3256.4045 | 1628.7059 | 3239.3780 | 1620.1926 | 3238.3940 | 1619.7006 | N | 289.1619 | 145.0846 | 272.1353 | 136.5713 |          |          | 2 |
| 31 |           |           |           |           |           |           | R | 175.1190 | 88.0631  | 158.0924 | 79.5498  |          |          | 1 |

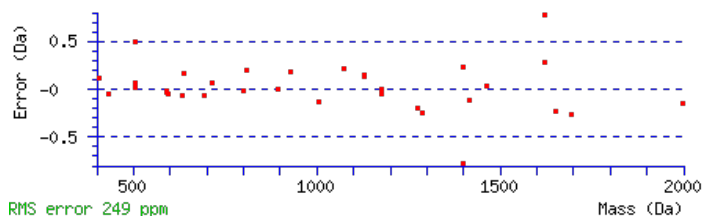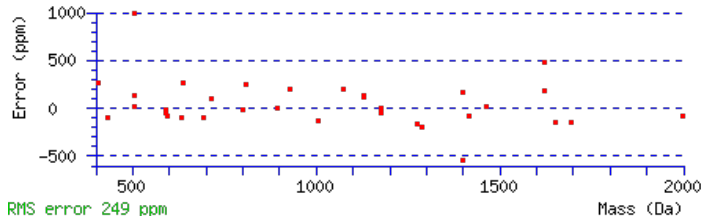

NCBI BLAST search of [DQYVEPENVTIQCDSGYGVVGPQSITCSGNR](#)

(Parameters: blastp, nr protein database, expect=20000, no filter, PAM30)

Other BLAST [web gateways](#)

All matches to this query

| Score | Mr(calc)  | Delta  | Sequence                                         | Site Analysis         |
|-------|-----------|--------|--------------------------------------------------|-----------------------|
| 66.0  | 3429.5089 | 0.0067 | <a href="#">DQYVEPENVTIQCDSGYGVVGPQSITCSGNR</a>  | Deamidated N8 48.18%  |
| 64.2  | 3429.5089 | 0.0067 | <a href="#">DQYVEPENVTIQCDSGYGVVGPQSITCSGNR</a>  | Deamidated Q12 31.90% |
| 60.9  | 3429.5089 | 0.0067 | <a href="#">DQYVEPENVTIQCDSGYGVVGPQSITCSGNR</a>  | Deamidated Q2 14.96%  |
| 59.2  | 3428.5249 | 0.9907 | <a href="#">DQYVEPENVTIQCDSGYGVVGPQSITCSGNR</a>  |                       |
| 55.8  | 3429.5089 | 0.0067 | <a href="#">DQYVEPENVTIQCDSGYGVVGPQSITCSGNR</a>  | Deamidated Q23 4.63%  |
| 44.3  | 3429.5089 | 0.0067 | <a href="#">DQYVEPENVTIQCDSGYGVVGPQSITCSGNR</a>  | Deamidated N30 0.33%  |
| 15.0  | 3427.4982 | 2.0174 | <a href="#">TGGTWTFSWTFESWVPGMKMTSNCQMOTSGLK</a> |                       |
| 15.0  | 3427.4982 | 2.0174 | <a href="#">TGGTWTFSWTFESWVPGMKMTSNCQMOTSGLK</a> |                       |
| 14.5  | 3427.4982 | 2.0174 | <a href="#">TGGTWTFSWTFESWVPGMKMTSNCQMOTSGLK</a> |                       |
| 10.8  | 3427.4982 | 2.0174 | <a href="#">TGGTWTFSWTFESWVPGMKMTSNCQMOTSGLK</a> |                       |

Mascot: <http://www.matrixscience.com/>

# MASCOT SCIENCE Mascot Search Results

## Peptide View

MS/MS Fragmentation of **FSLLGHAISCTVENETIGVWRPSPPTCEK**

Found in **P04003** in **con\_Xuniprot\_HUMAN3**, C4BPA\_HUMAN C4b-binding protein alpha chain OS=Homo sapiens GN=C4BPA PE=1 SV=2

Match to Query 27566: 3372.628736 from(844.164460,4+) intensity(24365.2656) rtinseconds(2224) scans(5373) index(16950)

Title: 111019\_Est\_MI\_YP\_G\_06Spectrum4458\_scans\_\_5373

Data file C:\mascot\20140703\_Tmgf\_1D\CSV\_UseAnalysis\MasterCSV\All\_Glyco\mgf\ptm\UC18ERLIC\_PTM\_35D.mgf

Click mouse within plot area to zoom in by factor of two about that point

Or, to Da

Label all possible matches Label matches used for scoring

Show Y-axis

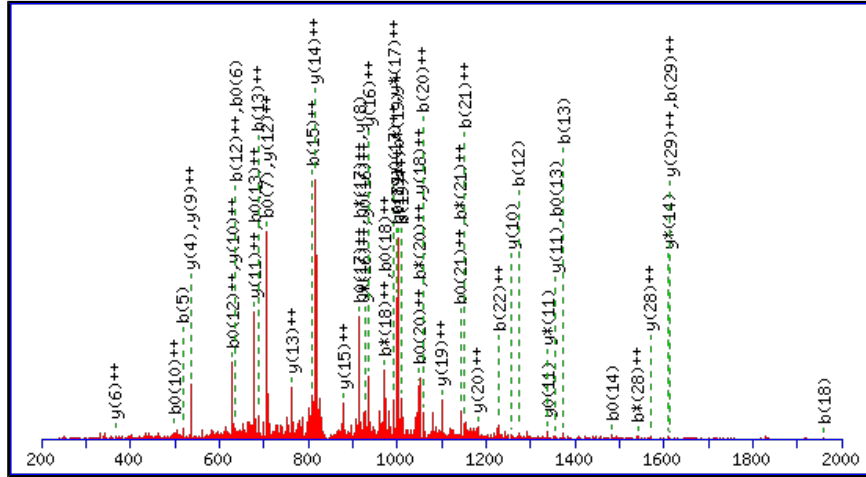

Monoisotopic mass of neutral peptide Mr(calc): 3372.6119

Fixed modifications: Carbamidomethyl (C) (apply to specified residues or termini only)

Variable modifications:

N15 : Deamidated (NQ)

Ions Score: 62 Expect: 0.00018

Matches : 56/316 fragment ions using 99 most intense peaks ([help](#))

| #  | b         | b <sup>++</sup> | b <sup>*</sup> | b <sup>*++</sup> | b <sup>0</sup> | b <sup>0++</sup> | Seq. | y         | y <sup>++</sup> | y <sup>*</sup> | y <sup>*++</sup> | y <sup>0</sup> | y <sup>0++</sup> | #  |
|----|-----------|-----------------|----------------|------------------|----------------|------------------|------|-----------|-----------------|----------------|------------------|----------------|------------------|----|
| 1  | 148.0757  | 74.5415         |                |                  |                |                  | F    |           |                 |                |                  |                |                  | 30 |
| 2  | 235.1077  | 118.0575        |                |                  | 217.0972       | 109.0522         | S    | 3226.5507 | 1613.7790       | 3209.5242      | 1605.2657        | 3208.5402      | 1604.7737        | 29 |
| 3  | 348.1918  | 174.5995        |                |                  | 330.1812       | 165.5942         | L    | 3139.5187 | 1570.2630       | 3122.4921      | 1561.7497        | 3121.5081      | 1561.2577        | 28 |
| 4  | 461.2758  | 231.1416        |                |                  | 443.2653       | 222.1363         | L    | 3026.4346 | 1513.7210       | 3009.4081      | 1505.2077        | 3008.4241      | 1504.7157        | 27 |
| 5  | 518.2973  | 259.6523        |                |                  | 500.2867       | 250.6470         | G    | 2913.3506 | 1457.1789       | 2896.3240      | 1448.6656        | 2895.3400      | 1448.1736        | 26 |
| 6  | 655.3562  | 328.1817        |                |                  | 637.3457       | 319.1765         | H    | 2856.3291 | 1428.6682       | 2839.3026      | 1420.1549        | 2838.3185      | 1419.6629        | 25 |
| 7  | 726.3933  | 363.7003        |                |                  | 708.3828       | 354.6950         | A    | 2719.2702 | 1360.1387       | 2702.2436      | 1351.6255        | 2701.2596      | 1351.1335        | 24 |
| 8  | 813.4254  | 407.2163        |                |                  | 795.4148       | 398.2110         | S    | 2648.2331 | 1324.6202       | 2631.2065      | 1316.1069        | 2630.2225      | 1315.6149        | 23 |
| 9  | 926.5094  | 463.7584        |                |                  | 908.4989       | 454.7531         | I    | 2561.2011 | 1281.1042       | 2544.1745      | 1272.5909        | 2543.1905      | 1272.0989        | 22 |
| 10 | 1013.5415 | 507.2744        |                |                  | 995.5309       | 498.2691         | S    | 2448.1170 | 1224.5621       | 2431.0904      | 1216.0489        | 2430.1064      | 1215.5568        | 21 |
| 11 | 1173.5721 | 587.2897        |                |                  | 1155.5615      | 578.2844         | C    | 2361.0850 | 1181.0461       | 2344.0584      | 1172.5328        | 2343.0744      | 1172.0408        | 20 |
| 12 | 1274.6198 | 637.8135        |                |                  | 1256.6092      | 628.8082         | T    | 2201.0543 | 1101.0308       | 2184.0278      | 1092.5175        | 2183.0437      | 1092.0255        | 19 |
| 13 | 1373.6882 | 687.3477        |                |                  | 1355.6776      | 678.3425         | V    | 2100.0066 | 1050.5070       | 2082.9801      | 1041.9937        | 2081.9961      | 1041.5017        | 18 |
| 14 | 1502.7308 | 751.8690        |                |                  | 1484.7202      | 742.8638         | E    | 2000.9382 | 1000.9727       | 1983.9117      | 992.4595         | 1982.9277      | 991.9675         | 17 |
| 15 | 1617.7577 | 809.3825        | 1600.7312      | 800.8692         | 1599.7472      | 800.3772         | N    | 1871.8956 | 936.4515        | 1854.8691      | 927.9382         | 1853.8851      | 927.4462         | 16 |
| 16 | 1746.8003 | 873.9038        | 1729.7738      | 865.3905         | 1728.7898      | 864.8985         | E    | 1756.8687 | 878.9380        | 1739.8421      | 870.4247         | 1738.8581      | 869.9327         | 15 |
| 17 | 1847.8480 | 924.4276        | 1830.8215      | 915.9144         | 1829.8374      | 915.4224         | T    | 1627.8261 | 814.4167        | 1610.7995      | 805.9034         | 1609.8155      | 805.4114         | 14 |
| 18 | 1960.9321 | 980.9697        | 1943.9055      | 972.4564         | 1942.9215      | 971.9644         | I    | 1526.7784 | 763.8928        | 1509.7519      | 755.3796         | 1508.7678      | 754.8876         | 13 |
| 19 | 2017.9535 | 1009.4804       | 2000.9270      | 1000.9671        | 1999.9430      | 1000.4751        | G    | 1413.6943 | 707.3508        | 1396.6678      | 698.8375         | 1395.6838      | 698.3455         | 12 |
| 20 | 2117.0219 | 1059.0146       | 2099.9954      | 1050.5013        | 2099.0114      | 1050.0093        | V    | 1356.6729 | 678.8401        | 1339.6463      | 670.3268         | 1338.6623      | 669.8348         | 11 |
| 21 | 2303.1013 | 1152.0543       | 2286.0747      | 1143.5410        | 2285.0907      | 1143.0490        | W    | 1257.6045 | 629.3059        | 1240.5779      | 620.7926         | 1239.5939      | 620.3006         | 10 |
| 22 | 2459.2024 | 1230.1048       | 2442.1758      | 1221.5915        | 2441.1918      | 1221.0995        | R    | 1071.5252 | 536.2662        | 1054.4986      | 527.7529         | 1053.5146      | 527.2609         | 9  |
| 23 | 2556.2551 | 1278.6312       | 2539.2286      | 1270.1179        | 2538.2446      | 1269.6259        | P    | 915.4240  | 458.2157        | 898.3975       | 449.7024         | 897.4135       | 449.2104         | 8  |



|    |           |           |           |           |           |           |   |          |          |          |          |          |          |   |
|----|-----------|-----------|-----------|-----------|-----------|-----------|---|----------|----------|----------|----------|----------|----------|---|
| 24 | 2643.2872 | 1322.1472 | 2626.2606 | 1313.6339 | 2625.2766 | 1313.1419 | S | 818.3713 | 409.6893 | 801.3447 | 401.1760 | 800.3607 | 400.6840 | 7 |
| 25 | 2740.3399 | 1370.6736 | 2723.3134 | 1362.1603 | 2722.3294 | 1361.6683 | P | 731.3393 | 366.1733 | 714.3127 | 357.6600 | 713.3287 | 357.1680 | 6 |
| 26 | 2837.3927 | 1419.2000 | 2820.3661 | 1410.6867 | 2819.3821 | 1410.1947 | P | 634.2865 | 317.6469 | 617.2599 | 309.1336 | 616.2759 | 308.6416 | 5 |
| 27 | 2938.4404 | 1469.7238 | 2921.4138 | 1461.2105 | 2920.4298 | 1460.7185 | T | 537.2337 | 269.1205 | 520.2072 | 260.6072 | 519.2232 | 260.1152 | 4 |
| 28 | 3098.4710 | 1549.7391 | 3081.4445 | 1541.2259 | 3080.4605 | 1540.7339 | C | 436.1860 | 218.5967 | 419.1595 | 210.0834 | 418.1755 | 209.5914 | 3 |
| 29 | 3227.5136 | 1614.2604 | 3210.4871 | 1605.7472 | 3209.5030 | 1605.2552 | E | 276.1554 | 138.5813 | 259.1288 | 130.0681 | 258.1448 | 129.5761 | 2 |
| 30 |           |           |           |           |           |           | K | 147.1128 | 74.0600  | 130.0863 | 65.5468  |          |          | 1 |

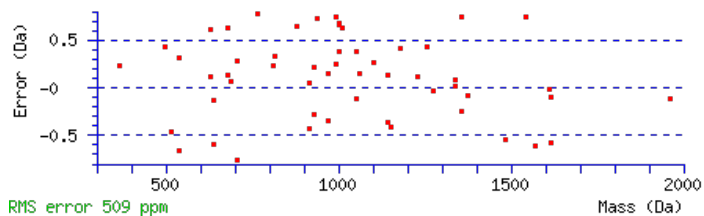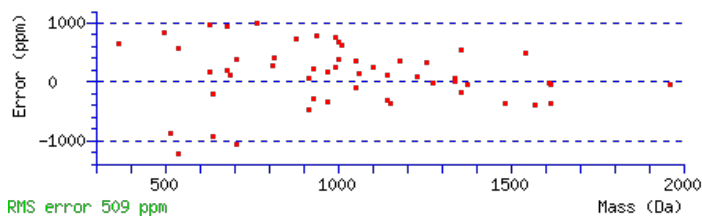

NCBI BLAST search of [FLLGHASISCTVENETIGVWRPSPPTCEK](#)  
 (Parameters: blastp, nr protein database, expect=20000, no filter, PAM30)  
 Other BLAST [web gateways](#)

All matches to this query

| Score | Mr(calc)  | Delta   | Sequence                                           |
|-------|-----------|---------|----------------------------------------------------|
| 61.9  | 3372.6119 | 0.0169  | <a href="#">FLLGHASISCTVENETIGVWRPSPPTCEK</a>      |
| 46.5  | 3371.6279 | 1.0009  | <a href="#">FLLGHASISCTVENETIGVWRPSPPTCEK</a>      |
| 11.4  | 3371.6256 | 1.0031  | <a href="#">FVDYKTSAAATSNQGGKVTSGVNSTLPVPSAEEK</a> |
| 9.2   | 3371.6103 | 1.0184  | <a href="#">QQSTLNEGLPKATASEDKQPSLPEESVSPSK</a>    |
| 8.9   | 3372.6383 | -0.0096 | <a href="#">SGWAIDPFGHSPTMAYLLNRAGLSHMLIOR</a>     |
| 7.5   | 3370.6263 | 2.0024  | <a href="#">QQSTLNEGLPKATASEDKQPSLPEESVSPSK</a>    |
| 7.5   | 3370.6263 | 2.0024  | <a href="#">QQSTLNEGLPKATASEDKQPSLPEESVSPSK</a>    |
| 7.5   | 3370.6263 | 2.0024  | <a href="#">QQSTLNEGLPKATASEDKQPSLPEESVSPSK</a>    |
| 7.2   | 3372.6370 | -0.0082 | <a href="#">INDESKENTIDYVLMIGMAGRYYATTITR</a>      |
| 7.2   | 3372.6370 | -0.0082 | <a href="#">INDESKENTIDYVLMIGMAGRYYATTITR</a>      |

Mascot: <http://www.matrixscience.com/>



# MASCOT SCIENCE Mascot Search Results

## Peptide View

MS/MS Fragmentation of **LSVDKDQYVEPENVTIQCDSGYGVVGPQSITCSGNR**

Found in **P04003** in **con\_Xuniprot\_HUMAN3**, C4BPA\_HUMAN C4b-binding protein alpha chain OS=Homo sapiens GN=C4BPA PE=1 SV=2

Match to Query 28257: 3974.799462 from(1325.940430,3+) intensity(0.0000) rtinseconds(2066) scans(5258) index(5477)

Title: 111019\_Est\_ISCardio\_NMI\_YP\_G\_8Spectrum4624\_scans\_\_5258

Data file C:\mascot\20140703\_Tmgf\_1D\CSV\_UseAnalysis\MasterCSV\All\_Glyco\mgf\ptm\UC18ERLIC\_PTM\_35D.mgf

Click mouse within plot area to zoom in by factor of two about that point

Or, to Da

Label all possible matches Label matches used for scoring

Show Y-axis

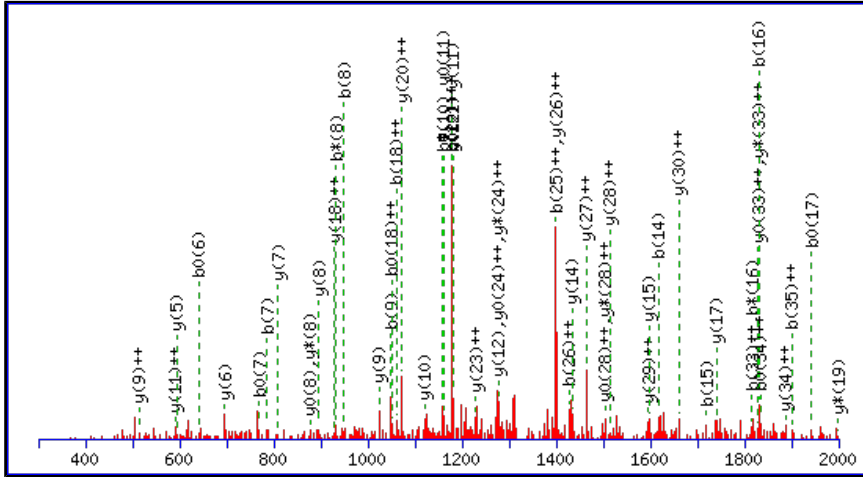

Monoisotopic mass of neutral peptide Mr(calc): 3973.7834

Fixed modifications: Carbamidomethyl (C) (apply to specified residues or termini only)

Variable modifications:

N13 : Deamidated (NQ)

Q28 : Deamidated (NQ)

N35 : Deamidated (NQ)

Ions Score: 40 Expect: 0.012

Matches : 55/404 fragment ions using 147 most intense peaks (help)

| #  | b         | b <sup>++</sup> | b <sup>*</sup> | b <sup>*++</sup> | b <sup>0</sup> | b <sup>0++</sup> | Seq. | y         | y <sup>++</sup> | y <sup>*</sup> | y <sup>*++</sup> | y <sup>0</sup> | y <sup>0++</sup> | #  |
|----|-----------|-----------------|----------------|------------------|----------------|------------------|------|-----------|-----------------|----------------|------------------|----------------|------------------|----|
| 1  | 114.0913  | 57.5493         |                |                  |                |                  | L    |           |                 |                |                  |                |                  | 36 |
| 2  | 201.1234  | 101.0653        |                |                  | 183.1128       | 92.0600          | S    | 3861.7066 | 1931.3569       | 3844.6800      | 1922.8437        | 3843.6960      | 1922.3516        | 35 |
| 3  | 300.1918  | 150.5995        |                |                  | 282.1812       | 141.5942         | V    | 3774.6745 | 1887.8409       | 3757.6480      | 1879.3276        | 3756.6640      | 1878.8356        | 34 |
| 4  | 415.2187  | 208.1130        |                |                  | 397.2082       | 199.1077         | D    | 3675.6061 | 1838.3067       | 3658.5796      | 1829.7934        | 3657.5956      | 1829.3014        | 33 |
| 5  | 543.3137  | 272.1605        | 526.2871       | 263.6472         | 525.3031       | 263.1552         | K    | 3560.5792 | 1780.7932       | 3543.5526      | 1772.2800        | 3542.5686      | 1771.7879        | 32 |
| 6  | 658.3406  | 329.6740        | 641.3141       | 321.1607         | 640.3301       | 320.6687         | D    | 3432.4842 | 1716.7458       | 3415.4577      | 1708.2325        | 3414.4737      | 1707.7405        | 31 |
| 7  | 786.3992  | 393.7032        | 769.3727       | 385.1900         | 768.3886       | 384.6980         | Q    | 3317.4573 | 1659.2323       | 3300.4307      | 1650.7190        | 3299.4467      | 1650.2270        | 30 |
| 8  | 949.4625  | 475.2349        | 932.4360       | 466.7216         | 931.4520       | 466.2296         | Y    | 3189.3987 | 1595.2030       | 3172.3722      | 1586.6897        | 3171.3881      | 1586.1977        | 29 |
| 9  | 1048.5310 | 524.7691        | 1031.5044      | 516.2558         | 1030.5204      | 515.7638         | V    | 3026.3354 | 1513.6713       | 3009.3088      | 1505.1581        | 3008.3248      | 1504.6660        | 28 |
| 10 | 1177.5735 | 589.2904        | 1160.5470      | 580.7771         | 1159.5630      | 580.2851         | E    | 2927.2670 | 1464.1371       | 2910.2404      | 1455.6238        | 2909.2564      | 1455.1318        | 27 |
| 11 | 1274.6263 | 637.8168        | 1257.5998      | 629.3035         | 1256.6157      | 628.8115         | P    | 2798.2244 | 1399.6158       | 2781.1978      | 1391.1025        | 2780.2138      | 1390.6105        | 26 |
| 12 | 1403.6689 | 702.3381        | 1386.6424      | 693.8248         | 1385.6583      | 693.3328         | E    | 2701.1716 | 1351.0894       | 2684.1451      | 1342.5762        | 2683.1610      | 1342.0842        | 25 |
| 13 | 1518.6958 | 759.8516        | 1501.6693      | 751.3383         | 1500.6853      | 750.8463         | N    | 2572.1290 | 1286.5681       | 2555.1025      | 1278.0549        | 2554.1184      | 1277.5629        | 24 |
| 14 | 1617.7643 | 809.3858        | 1600.7377      | 800.8725         | 1599.7537      | 800.3805         | V    | 2457.1021 | 1229.0547       | 2440.0755      | 1220.5414        | 2439.0915      | 1220.0494        | 23 |
| 15 | 1718.8119 | 859.9096        | 1701.7854      | 851.3963         | 1700.8014      | 850.9043         | T    | 2358.0337 | 1179.5205       | 2341.0071      | 1171.0072        | 2340.0231      | 1170.5152        | 22 |
| 16 | 1831.8960 | 916.4516        | 1814.8695      | 907.9384         | 1813.8854      | 907.4464         | I    | 2256.9860 | 1128.9966       | 2239.9594      | 1120.4834        | 2238.9754      | 1119.9913        | 21 |
| 17 | 1959.9546 | 980.4809        | 1942.9280      | 971.9677         | 1941.9440      | 971.4756         | Q    | 2143.9019 | 1072.4546       | 2126.8754      | 1063.9413        | 2125.8913      | 1063.4493        | 20 |
| 18 | 2119.9852 | 1060.4963       | 2102.9587      | 1051.9830        | 2101.9747      | 1051.4910        | C    | 2015.8433 | 1008.4253       | 1998.8168      | 999.9120         | 1997.8328      | 999.4200         | 19 |
| 19 | 2235.0122 | 1118.0097       | 2217.9856      | 1109.4964        | 2217.0016      | 1109.0044        | D    | 1855.8127 | 928.4100        | 1838.7861      | 919.8967         | 1837.8021      | 919.4047         | 18 |
| 20 | 2322.0442 | 1161.5257       | 2305.0177      | 1153.0125        | 2304.0336      | 1152.5205        | S    | 1740.7857 | 870.8965        | 1723.7592      | 862.3832         | 1722.7752      | 861.8912         | 17 |
| 21 | 2379.0657 | 1190.0365       | 2362.0391      | 1181.5232        | 2361.0551      | 1181.0312        | G    | 1653.7537 | 827.3805        | 1636.7272      | 818.8672         | 1635.7431      | 818.3752         | 16 |
| 22 | 2542.1290 | 1271.5681       | 2525.1024      | 1263.0549        | 2524.1184      | 1262.5629        | Y    | 1596.7322 | 798.8698        | 1579.7057      | 790.3565         | 1578.7217      | 789.8645         | 15 |

|    |           |           |           |           |           |           |   |           |          |           |          |           |          |    |
|----|-----------|-----------|-----------|-----------|-----------|-----------|---|-----------|----------|-----------|----------|-----------|----------|----|
| 23 | 2599.1505 | 1300.0789 | 2582.1239 | 1291.5656 | 2581.1399 | 1291.0736 | G | 1433.6689 | 717.3381 | 1416.6424 | 708.8248 | 1415.6584 | 708.3328 | 14 |
| 24 | 2698.2189 | 1349.6131 | 2681.1923 | 1341.0998 | 2680.2083 | 1340.6078 | V | 1376.6475 | 688.8274 | 1359.6209 | 680.3141 | 1358.6369 | 679.8221 | 13 |
| 25 | 2797.2873 | 1399.1473 | 2780.2607 | 1390.6340 | 2779.2767 | 1390.1420 | V | 1277.5790 | 639.2932 | 1260.5525 | 630.7799 | 1259.5685 | 630.2879 | 12 |
| 26 | 2854.3087 | 1427.6580 | 2837.2822 | 1419.1447 | 2836.2982 | 1418.6527 | G | 1178.5106 | 589.7590 | 1161.4841 | 581.2457 | 1160.5001 | 580.7537 | 11 |
| 27 | 2951.3615 | 1476.1844 | 2934.3350 | 1467.6711 | 2933.3509 | 1467.1791 | P | 1121.4892 | 561.2482 | 1104.4626 | 552.7349 | 1103.4786 | 552.2429 | 10 |
| 28 | 3080.4041 | 1540.7057 | 3063.3776 | 1532.1924 | 3062.3935 | 1531.7004 | Q | 1024.4364 | 512.7218 | 1007.4099 | 504.2086 | 1006.4258 | 503.7166 | 9  |
| 29 | 3167.4361 | 1584.2217 | 3150.4096 | 1575.7084 | 3149.4256 | 1575.2164 | S | 895.3938  | 448.2005 | 878.3673  | 439.6873 | 877.3832  | 439.1953 | 8  |
| 30 | 3280.5202 | 1640.7637 | 3263.4936 | 1632.2505 | 3262.5096 | 1631.7585 | I | 808.3618  | 404.6845 | 791.3352  | 396.1713 | 790.3512  | 395.6792 | 7  |
| 31 | 3381.5679 | 1691.2876 | 3364.5413 | 1682.7743 | 3363.5573 | 1682.2823 | T | 695.2777  | 348.1425 | 678.2512  | 339.6292 | 677.2671  | 339.1372 | 6  |
| 32 | 3541.5985 | 1771.3029 | 3524.5720 | 1762.7896 | 3523.5880 | 1762.2976 | C | 594.2300  | 297.6187 | 577.2035  | 289.1054 | 576.2195  | 288.6134 | 5  |
| 33 | 3628.6306 | 1814.8189 | 3611.6040 | 1806.3056 | 3610.6200 | 1805.8136 | S | 434.1994  | 217.6033 | 417.1728  | 209.0901 | 416.1888  | 208.5980 | 4  |
| 34 | 3685.6520 | 1843.3296 | 3668.6255 | 1834.8164 | 3667.6415 | 1834.3244 | G | 347.1674  | 174.0873 | 330.1408  | 165.5740 |           |          | 3  |
| 35 | 3800.6790 | 1900.8431 | 3783.6524 | 1892.3298 | 3782.6684 | 1891.8378 | N | 290.1459  | 145.5766 | 273.1193  | 137.0633 |           |          | 2  |
| 36 |           |           |           |           |           |           | R | 175.1190  | 88.0631  | 158.0924  | 79.5498  |           |          | 1  |

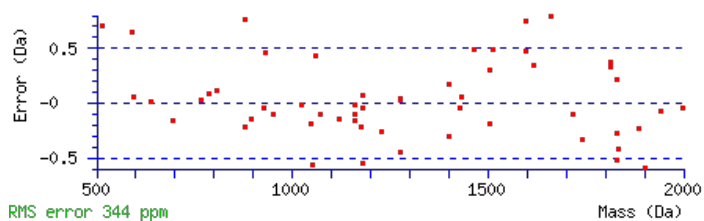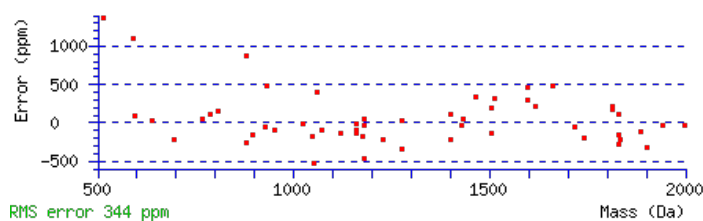

NCBI BLAST search of [LSVDKDQYVEPENVTIQDSGYGVVGPQSITCSGNR](#)

(Parameters: blastp, nr protein database, expect=20000, no filter, PAM30)

Other BLAST [web gateways](#)

All matches to this query

| Score | Mr(calc)  | Delta  | Sequence                                            | Site Analysis                   |
|-------|-----------|--------|-----------------------------------------------------|---------------------------------|
| 40.3  | 3973.7834 | 1.0161 | <a href="#">LSVDKDQYVEPENVTIQDSGYGVVGPQSITCSGNR</a> | Deamidated N13, Q28, N35 49.67% |
| 38.8  | 3973.7834 | 1.0161 | <a href="#">LSVDKDQYVEPENVTIQDSGYGVVGPQSITCSGNR</a> | Deamidated Q17, Q28, N35 35.49% |
| 30.3  | 3973.7834 | 1.0161 | <a href="#">LSVDKDQYVEPENVTIQDSGYGVVGPQSITCSGNR</a> | Deamidated Q7, Q17, N35 4.92%   |
| 28.7  | 3973.7834 | 1.0161 | <a href="#">LSVDKDQYVEPENVTIQDSGYGVVGPQSITCSGNR</a> | Deamidated N13, Q17, N35 3.45%  |
| 28.3  | 3973.7834 | 1.0161 | <a href="#">LSVDKDQYVEPENVTIQDSGYGVVGPQSITCSGNR</a> | Deamidated Q7, Q28, N35 3.16%   |
| 26.6  | 3973.7834 | 1.0161 | <a href="#">LSVDKDQYVEPENVTIQDSGYGVVGPQSITCSGNR</a> | Deamidated Q7, N13, N35 2.12%   |
| 22.8  | 3972.7994 | 2.0001 | <a href="#">LSVDKDQYVEPENVTIQDSGYGVVGPQSITCSGNR</a> |                                 |
| 20.1  | 3973.7834 | 1.0161 | <a href="#">LSVDKDQYVEPENVTIQDSGYGVVGPQSITCSGNR</a> | Deamidated Q7, Q17, Q28 0.48%   |
| 19.4  | 3972.7994 | 2.0001 | <a href="#">LSVDKDQYVEPENVTIQDSGYGVVGPQSITCSGNR</a> |                                 |
| 17.8  | 3973.7834 | 1.0161 | <a href="#">LSVDKDQYVEPENVTIQDSGYGVVGPQSITCSGNR</a> | Deamidated N13, Q17, Q28 0.28%  |

Mascot: <http://www.matrixscience.com/>

# MASCOT SCIENCE Mascot Search Results

## Peptide View

MS/MS Fragmentation of **LSVDKDQYVEPENVTIQCDSGYGVVGPQSITCSGNR**

Found in **P04003** in **con\_Xuniprot\_HUMAN3**, C4BPA\_HUMAN C4b-binding protein alpha chain OS=Homo sapiens GN=C4BPA PE=1 SV=2

Match to Query 28256: 3974.797656 from(994.706690,4+) intensity(22500.8281) rtinseconds(1597) scans(4076) index(18595)

Title: 111019\_Est\_MI\_YP\_G\_08Spectrum3542\_scans\_\_4076

Data file C:\mascot\20140703\_Tmgf\_1D\CSV\_UseAnalysis\MasterCSV\All\_Glyco\mgf\ptm\UC18ERLIC\_PTM\_35D.mgf

Click mouse within plot area to zoom in by factor of two about that point

Or,  to  Da

Label all possible matches  Label matches used for scoring

Show Y-axis

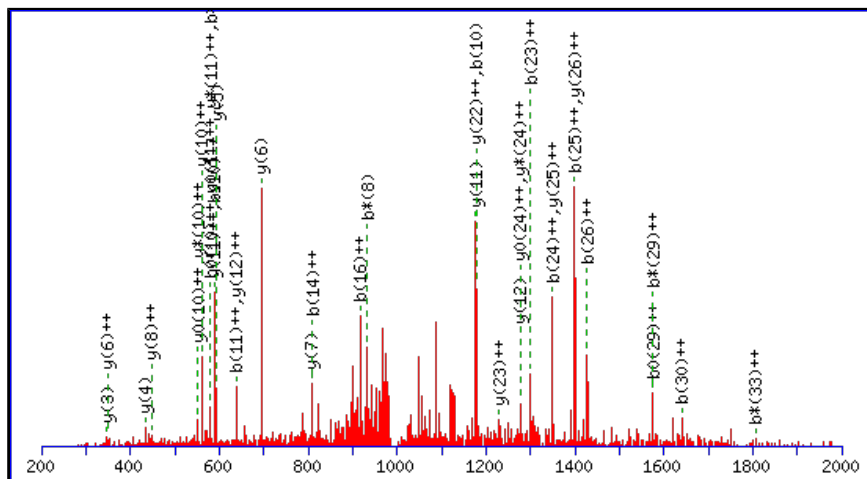

Monoisotopic mass of neutral peptide Mr(calc): 3973.7834

Fixed modifications: Carbamidomethyl (C) (apply to specified residues or termini only)

Variable modifications:

Q7 : Deamidated (NQ)

N13 : Deamidated (NQ)

N35 : Deamidated (NQ)

Ions Score: 40 Expect: 0.013

Matches : 38/404 fragment ions using 51 most intense peaks ([help](#))

| #  | b         | b <sup>++</sup> | b <sup>*</sup> | b <sup>*++</sup> | b <sup>0</sup> | b <sup>0++</sup> | Seq. | y         | y <sup>++</sup> | y <sup>*</sup> | y <sup>*++</sup> | y <sup>0</sup> | y <sup>0++</sup> | #  |
|----|-----------|-----------------|----------------|------------------|----------------|------------------|------|-----------|-----------------|----------------|------------------|----------------|------------------|----|
| 1  | 114.0913  | 57.5493         |                |                  |                |                  | L    |           |                 |                |                  |                |                  | 36 |
| 2  | 201.1234  | 101.0653        |                |                  | 183.1128       | 92.0600          | S    | 3861.7066 | 1931.3569       | 3844.6800      | 1922.8437        | 3843.6960      | 1922.3516        | 35 |
| 3  | 300.1918  | 150.5995        |                |                  | 282.1812       | 141.5942         | V    | 3774.6745 | 1887.8409       | 3757.6480      | 1879.3276        | 3756.6640      | 1878.8356        | 34 |
| 4  | 415.2187  | 208.1130        |                |                  | 397.2082       | 199.1077         | D    | 3675.6061 | 1838.3067       | 3658.5796      | 1829.7934        | 3657.5956      | 1829.3014        | 33 |
| 5  | 543.3137  | 272.1605        | 526.2871       | 263.6472         | 525.3031       | 263.1552         | K    | 3560.5792 | 1780.7932       | 3543.5526      | 1772.2800        | 3542.5686      | 1771.7879        | 32 |
| 6  | 658.3406  | 329.6740        | 641.3141       | 321.1607         | 640.3301       | 320.6687         | D    | 3432.4842 | 1716.7458       | 3415.4577      | 1708.2325        | 3414.4737      | 1707.7405        | 31 |
| 7  | 787.3832  | 394.1953        | 770.3567       | 385.6820         | 769.3727       | 385.1900         | Q    | 3317.4573 | 1659.2323       | 3300.4307      | 1650.7190        | 3299.4467      | 1650.2270        | 30 |
| 8  | 950.4466  | 475.7269        | 933.4200       | 467.2136         | 932.4360       | 466.7216         | Y    | 3188.4147 | 1594.7110       | 3171.3881      | 1586.1977        | 3170.4041      | 1585.7057        | 29 |
| 9  | 1049.5150 | 525.2611        | 1032.4884      | 516.7478         | 1031.5044      | 516.2558         | V    | 3025.3514 | 1513.1793       | 3008.3248      | 1504.6660        | 3007.3408      | 1504.1740        | 28 |
| 10 | 1178.5576 | 589.7824        | 1161.5310      | 581.2691         | 1160.5470      | 580.7771         | E    | 2926.2829 | 1463.6451       | 2909.2564      | 1455.1318        | 2908.2724      | 1454.6398        | 27 |
| 11 | 1275.6103 | 638.3088        | 1258.5838      | 629.7955         | 1257.5998      | 629.3035         | P    | 2797.2404 | 1399.1238       | 2780.2138      | 1390.6105        | 2779.2298      | 1390.1185        | 26 |
| 12 | 1404.6529 | 702.8301        | 1387.6264      | 694.3168         | 1386.6424      | 693.8248         | E    | 2700.1876 | 1350.5974       | 2683.1610      | 1342.0842        | 2682.1770      | 1341.5921        | 25 |
| 13 | 1519.6799 | 760.3436        | 1502.6533      | 751.8303         | 1501.6693      | 751.3383         | N    | 2571.1450 | 1286.0761       | 2554.1184      | 1277.5629        | 2553.1344      | 1277.0709        | 24 |
| 14 | 1618.7483 | 809.8778        | 1601.7217      | 801.3645         | 1600.7377      | 800.8725         | V    | 2456.1181 | 1228.5627       | 2439.0915      | 1220.0494        | 2438.1075      | 1219.5574        | 23 |
| 15 | 1719.7960 | 860.4016        | 1702.7694      | 851.8883         | 1701.7854      | 851.3963         | T    | 2357.0496 | 1179.0285       | 2340.0231      | 1170.5152        | 2339.0391      | 1170.0232        | 22 |
| 16 | 1832.8800 | 916.9436        | 1815.8535      | 908.4304         | 1814.8695      | 907.9384         | I    | 2256.0020 | 1128.5046       | 2238.9754      | 1119.9913        | 2237.9914      | 1119.4993        | 21 |
| 17 | 1960.9386 | 980.9729        | 1943.9120      | 972.4597         | 1942.9280      | 971.9677         | Q    | 2142.9179 | 1071.9626       | 2125.8913      | 1063.4493        | 2124.9073      | 1062.9573        | 20 |
| 18 | 2120.9692 | 1060.9883       | 2103.9427      | 1052.4750        | 2102.9587      | 1051.9830        | C    | 2014.8593 | 1007.9333       | 1997.8328      | 999.4200         | 1996.8488      | 998.9280         | 19 |
| 19 | 2235.9962 | 1118.5017       | 2218.9696      | 1109.9885        | 2217.9856      | 1109.4964        | D    | 1854.8287 | 927.9180        | 1837.8021      | 919.4047         | 1836.8181      | 918.9127         | 18 |
| 20 | 2323.0282 | 1162.0177       | 2306.0017      | 1153.5045        | 2305.0177      | 1153.0125        | S    | 1739.8017 | 870.4045        | 1722.7752      | 861.8912         | 1721.7912      | 861.3992         | 17 |
| 21 | 2380.0497 | 1190.5285       | 2363.0231      | 1182.0152        | 2362.0391      | 1181.5232        | G    | 1652.7697 | 826.8885        | 1635.7431      | 818.3752         | 1634.7591      | 817.8832         | 16 |
| 22 | 2543.1130 | 1272.0601       | 2526.0865      | 1263.5469        | 2525.1024      | 1263.0549        | Y    | 1595.7482 | 798.3778        | 1578.7217      | 789.8645         | 1577.7377      | 789.3725         | 15 |

|    |           |                  |           |                  |           |                  |          |                  |                 |           |                 |           |                 |           |
|----|-----------|------------------|-----------|------------------|-----------|------------------|----------|------------------|-----------------|-----------|-----------------|-----------|-----------------|-----------|
| 23 | 2600.1345 | <b>1300.5709</b> | 2583.1079 | 1292.0576        | 2582.1239 | 1291.5656        | <b>G</b> | 1432.6849        | 716.8461        | 1415.6584 | 708.3328        | 1414.6743 | 707.8408        | <b>14</b> |
| 24 | 2699.2029 | <b>1350.1051</b> | 2682.1763 | 1341.5918        | 2681.1923 | 1341.0998        | <b>V</b> | 1375.6634        | 688.3354        | 1358.6369 | 679.8221        | 1357.6529 | 679.3301        | <b>13</b> |
| 25 | 2798.2713 | <b>1399.6393</b> | 2781.2448 | 1391.1260        | 2780.2607 | 1390.6340        | <b>V</b> | <b>1276.5950</b> | <b>638.8012</b> | 1259.5685 | 630.2879        | 1258.5845 | 629.7959        | <b>12</b> |
| 26 | 2855.2928 | <b>1428.1500</b> | 2838.2662 | 1419.6367        | 2837.2822 | 1419.1447        | <b>G</b> | <b>1177.5266</b> | <b>589.2669</b> | 1160.5001 | <b>580.7537</b> | 1159.5160 | <b>580.2617</b> | <b>11</b> |
| 27 | 2952.3455 | 1476.6764        | 2935.3190 | 1468.1631        | 2934.3350 | 1467.6711        | <b>P</b> | 1120.5051        | <b>560.7562</b> | 1103.4786 | <b>552.2429</b> | 1102.4946 | <b>551.7509</b> | <b>10</b> |
| 28 | 3080.4041 | 1540.7057        | 3063.3776 | 1532.1924        | 3062.3935 | 1531.7004        | <b>Q</b> | 1023.4524        | 512.2298        | 1006.4258 | 503.7166        | 1005.4418 | 503.2245        | <b>9</b>  |
| 29 | 3167.4361 | 1584.2217        | 3150.4096 | <b>1575.7084</b> | 3149.4256 | <b>1575.2164</b> | <b>S</b> | 895.3938         | <b>448.2005</b> | 878.3673  | 439.6873        | 877.3832  | 439.1953        | <b>8</b>  |
| 30 | 3280.5202 | <b>1640.7637</b> | 3263.4936 | 1632.2505        | 3262.5096 | 1631.7585        | <b>I</b> | <b>808.3618</b>  | 404.6845        | 791.3352  | 396.1713        | 790.3512  | 395.6792        | <b>7</b>  |
| 31 | 3381.5679 | 1691.2876        | 3364.5413 | 1682.7743        | 3363.5573 | 1682.2823        | <b>T</b> | <b>695.2777</b>  | <b>348.1425</b> | 678.2512  | 339.6292        | 677.2671  | 339.1372        | <b>6</b>  |
| 32 | 3541.5985 | 1771.3029        | 3524.5720 | 1762.7896        | 3523.5880 | 1762.2976        | <b>C</b> | <b>594.2300</b>  | 297.6187        | 577.2035  | 289.1054        | 576.2195  | 288.6134        | <b>5</b>  |
| 33 | 3628.6306 | 1814.8189        | 3611.6040 | <b>1806.3056</b> | 3610.6200 | 1805.8136        | <b>S</b> | <b>434.1994</b>  | 217.6033        | 417.1728  | 209.0901        | 416.1888  | 208.5980        | <b>4</b>  |
| 34 | 3685.6520 | 1843.3296        | 3668.6255 | 1834.8164        | 3667.6415 | 1834.3244        | <b>G</b> | <b>347.1674</b>  | 174.0873        | 330.1408  | 165.5740        |           |                 | <b>3</b>  |
| 35 | 3800.6790 | 1900.8431        | 3783.6524 | 1892.3298        | 3782.6684 | 1891.8378        | <b>N</b> | 290.1459         | 145.5766        | 273.1193  | 137.0633        |           |                 | <b>2</b>  |
| 36 |           |                  |           |                  |           |                  | <b>R</b> | 175.1190         | 88.0631         | 158.0924  | 79.5498         |           |                 | <b>1</b>  |

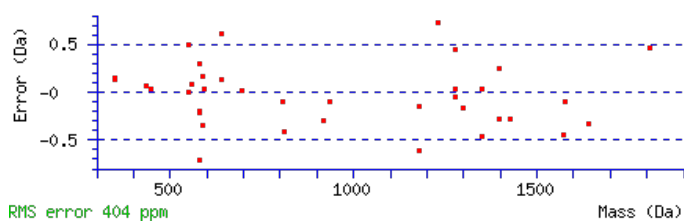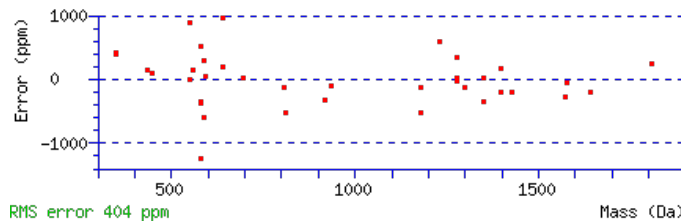

NCBI BLAST search of [LSVDKDQYVEPENVTIQDSGYGVVGPQSITCSGNR](#)

(Parameters: blastp, nr protein database, expect=20000, no filter, PAM30)

Other BLAST [web gateways](#)

All matches to this query

| Score | Mr(calc)  | Delta  | Sequence                                            | Site Analysis                  |
|-------|-----------|--------|-----------------------------------------------------|--------------------------------|
| 39.8  | 3973.7834 | 1.0143 | <a href="#">LSVDKDQYVEPENVTIQDSGYGVVGPQSITCSGNR</a> | Deamidated Q7, N13, N35 35.33% |
| 38.1  | 3972.7994 | 1.9983 | <a href="#">LSVDKDQYVEPENVTIQDSGYGVVGPQSITCSGNR</a> |                                |
| 36.8  | 3973.7834 | 1.0143 | <a href="#">LSVDKDQYVEPENVTIQDSGYGVVGPQSITCSGNR</a> | Deamidated Q7, Q17, N35 17.87% |
| 35.0  | 3972.7994 | 1.9983 | <a href="#">LSVDKDQYVEPENVTIQDSGYGVVGPQSITCSGNR</a> |                                |
| 34.7  | 3973.7834 | 1.0143 | <a href="#">LSVDKDQYVEPENVTIQDSGYGVVGPQSITCSGNR</a> | Deamidated Q7, Q28, N35 11.12% |
| 33.7  | 3972.7994 | 1.9983 | <a href="#">LSVDKDQYVEPENVTIQDSGYGVVGPQSITCSGNR</a> |                                |
| 32.2  | 3973.7834 | 1.0143 | <a href="#">LSVDKDQYVEPENVTIQDSGYGVVGPQSITCSGNR</a> | Deamidated Q17, Q28, N35 6.22% |
| 32.2  | 3973.7834 | 1.0143 | <a href="#">LSVDKDQYVEPENVTIQDSGYGVVGPQSITCSGNR</a> | Deamidated N13, Q28, N35 6.22% |
| 31.8  | 3972.7994 | 1.9983 | <a href="#">LSVDKDQYVEPENVTIQDSGYGVVGPQSITCSGNR</a> |                                |
| 31.7  | 3973.7834 | 1.0143 | <a href="#">LSVDKDQYVEPENVTIQDSGYGVVGPQSITCSGNR</a> | Deamidated N13, Q17, N35 5.56% |

Mascot: <http://www.matrixscience.com/>

# MATRIX SCIENCE Mascot Search Results

## Peptide View

MS/MS Fragmentation of **NNATVHEQVGGPSLTSDLQAQSK**

Found in **F5GX75** in **con\_Xuniprot\_HUMAN3**, F5GX75\_HUMAN Vitronectin (Fragment) OS=Homo sapiens GN=VTN PE=2 SV=2

Match to Query 21427: 2381.156948 from(1191.585750,2+) intensity(41018.5938) rtinseconds(892) scans(2040) index(15671)

Title: 111019\_Est\_ML\_YP\_G\_05Spectrum1728\_scans\_\_2040

Data file C:\mascot\20140703\_Tmgf\_1D\CSV\_UseAnalysis\MasterCSV\All\_Glyco\mgf\ptm\UC18ERLIC\_PTM\_35D.mgf

Click mouse within plot area to zoom in by factor of two about that point

Or,  to  Da

Label all possible matches  Label matches used for scoring

Show Y-axis

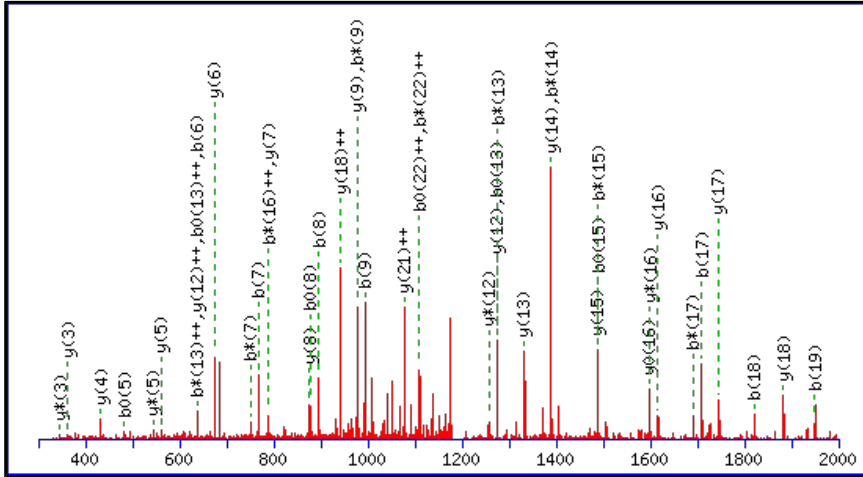

Monoisotopic mass of neutral peptide Mr(calc): 2381.1459

Fixed modifications: Carbamidomethyl (C) (apply to specified residues or termini only)

Variable modifications:

N2 : Deamidated (NQ)

Ions Score: 107 Expect: 5.9e-009

Matches : 44/256 fragment ions using 51 most intense peaks ([help](#))

| #  | b         | b <sup>++</sup> | b <sup>*</sup> | b <sup>*++</sup> | b <sup>0</sup> | b <sup>0++</sup> | Seq. | y         | y <sup>++</sup> | y <sup>*</sup> | y <sup>*++</sup> | y <sup>0</sup> | y <sup>0++</sup> | #  |
|----|-----------|-----------------|----------------|------------------|----------------|------------------|------|-----------|-----------------|----------------|------------------|----------------|------------------|----|
| 1  | 115.0502  | 58.0287         | 98.0237        | 49.5155          |                |                  | N    |           |                 |                |                  |                |                  | 23 |
| 2  | 230.0771  | 115.5422        | 213.0506       | 107.0289         |                |                  | N    | 2268.1102 | 1134.5588       | 2251.0837      | 1126.0455        | 2250.0997      | 1125.5535        | 22 |
| 3  | 301.1143  | 151.0608        | 284.0877       | 142.5475         |                |                  | A    | 2153.0833 | 1077.0453       | 2136.0568      | 1068.5320        | 2135.0727      | 1068.0400        | 21 |
| 4  | 402.1619  | 201.5846        | 385.1354       | 193.0713         | 384.1514       | 192.5793         | T    | 2082.0462 | 1041.5267       | 2065.0196      | 1033.0135        | 2064.0356      | 1032.5215        | 20 |
| 5  | 501.2304  | 251.1188        | 484.2038       | 242.6055         | 483.2198       | 242.1135         | V    | 1980.9985 | 991.0029        | 1963.9720      | 982.4896         | 1962.9879      | 981.9976         | 19 |
| 6  | 638.2893  | 319.6483        | 621.2627       | 311.1350         | 620.2787       | 310.6430         | H    | 1881.9301 | 941.4687        | 1864.9035      | 932.9554         | 1863.9195      | 932.4634         | 18 |
| 7  | 767.3319  | 384.1696        | 750.3053       | 375.6563         | 749.3213       | 375.1643         | E    | 1744.8712 | 872.9392        | 1727.8446      | 864.4260         | 1726.8606      | 863.9339         | 17 |
| 8  | 895.3904  | 448.1989        | 878.3639       | 439.6856         | 877.3799       | 439.1936         | Q    | 1615.8286 | 808.4179        | 1598.8020      | 799.9047         | 1597.8180      | 799.4127         | 16 |
| 9  | 994.4589  | 497.7331        | 977.4323       | 489.2198         | 976.4483       | 488.7278         | V    | 1487.7700 | 744.3886        | 1470.7435      | 735.8754         | 1469.7594      | 735.3834         | 15 |
| 10 | 1051.4803 | 526.2438        | 1034.4538      | 517.7305         | 1033.4697      | 517.2385         | G    | 1388.7016 | 694.8544        | 1371.6751      | 686.3412         | 1370.6910      | 685.8492         | 14 |
| 11 | 1108.5018 | 554.7545        | 1091.4752      | 546.2413         | 1090.4912      | 545.7492         | G    | 1331.6801 | 666.3437        | 1314.6536      | 657.8304         | 1313.6696      | 657.3384         | 13 |
| 12 | 1205.5545 | 603.2809        | 1188.5280      | 594.7676         | 1187.5440      | 594.2756         | P    | 1274.6587 | 637.8330        | 1257.6321      | 629.3197         | 1256.6481      | 628.8277         | 12 |
| 13 | 1292.5866 | 646.7969        | 1275.5600      | 638.2836         | 1274.5760      | 637.7916         | S    | 1177.6059 | 589.3066        | 1160.5794      | 580.7933         | 1159.5953      | 580.3013         | 11 |
| 14 | 1405.6706 | 703.3390        | 1388.6441      | 694.8257         | 1387.6601      | 694.3337         | L    | 1090.5739 | 545.7906        | 1073.5473      | 537.2773         | 1072.5633      | 536.7853         | 10 |
| 15 | 1506.7183 | 753.8628        | 1489.6918      | 745.3495         | 1488.7077      | 744.8575         | T    | 977.4898  | 489.2485        | 960.4633       | 480.7353         | 959.4793       | 480.2433         | 9  |
| 16 | 1593.7503 | 797.3788        | 1576.7238      | 788.8655         | 1575.7398      | 788.3735         | S    | 876.4421  | 438.7247        | 859.4156       | 430.2114         | 858.4316       | 429.7194         | 8  |
| 17 | 1708.7773 | 854.8923        | 1691.7507      | 846.3790         | 1690.7667      | 845.8870         | D    | 789.4101  | 395.2087        | 772.3836       | 386.6954         | 771.3995       | 386.2034         | 7  |
| 18 | 1821.8613 | 911.4343        | 1804.8348      | 902.9210         | 1803.8508      | 902.4290         | L    | 674.3832  | 337.6952        | 657.3566       | 329.1819         | 656.3726       | 328.6899         | 6  |
| 19 | 1949.9199 | 975.4636        | 1932.8934      | 966.9503         | 1931.9094      | 966.4583         | Q    | 561.2991  | 281.1532        | 544.2726       | 272.6399         | 543.2885       | 272.1479         | 5  |
| 20 | 2020.9570 | 1010.9822       | 2003.9305      | 1002.4689        | 2002.9465      | 1001.9769        | A    | 433.2405  | 217.1239        | 416.2140       | 208.6106         | 415.2300       | 208.1186         | 4  |
| 21 | 2149.0156 | 1075.0114       | 2131.9891      | 1066.4982        | 2131.0051      | 1066.0062        | Q    | 362.2034  | 181.6053        | 345.1769       | 173.0921         | 344.1928       | 172.6001         | 3  |
| 22 | 2236.0476 | 1118.5275       | 2219.0211      | 1110.0142        | 2218.0371      | 1109.5222        | S    | 234.1448  | 117.5761        | 217.1183       | 109.0628         | 216.1343       | 108.5708         | 2  |
| 23 |           |                 |                |                  |                |                  | K    | 147.1128  | 74.0600         | 130.0863       | 65.5468          |                |                  | 1  |

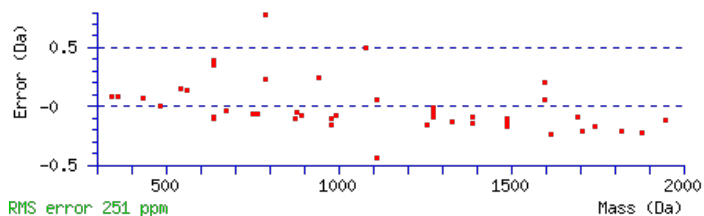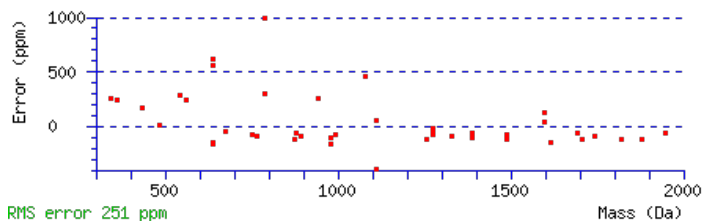

NCBI **BLAST** search of [NNATVHEQVGGPSLTSDLQAQSK](#)  
 (Parameters: blastp, nr protein database, expect=20000, no filter, PAM30)  
 Other BLAST [web gateways](#)

**All matches to this query**

| Score | Mr(calc)  | Delta  | Sequence                                | Site Analysis        |
|-------|-----------|--------|-----------------------------------------|----------------------|
| 106.8 | 2381.1459 | 0.0111 | <a href="#">NNATVHEQVGGPSLTSDLQAQSK</a> | Deamidated N2 49.58% |
| 106.8 | 2381.1459 | 0.0111 | <a href="#">NNATVHEQVGGPSLTSDLQAQSK</a> | Deamidated N1 49.58% |
| 89.1  | 2381.1459 | 0.0111 | <a href="#">NNATVHEQVGGPSLTSDLQAQSK</a> | Deamidated Q8 0.83%  |
| 73.2  | 2380.1619 | 0.9951 | <a href="#">NNATVHEQVGGPSLTSDLQAQSK</a> |                      |
| 39.4  | 2381.1459 | 0.0111 | <a href="#">NNATVHEQVGGPSLTSDLQAQSK</a> | Deamidated Q19 0.00% |
| 34.0  | 2381.1459 | 0.0111 | <a href="#">NNATVHEQVGGPSLTSDLQAQSK</a> | Deamidated Q21 0.00% |
| 14.7  | 2380.1501 | 1.0068 | <a href="#">CEQQMAKVQKLEESLLATEK</a>    |                      |
| 5.6   | 2380.1501 | 1.0068 | <a href="#">CEQQMAKVQKLEESLLATEK</a>    |                      |
| 5.6   | 2380.1501 | 1.0068 | <a href="#">CEQQMAKVQKLEESLLATEK</a>    |                      |
| 0.4   | 2379.1423 | 2.0146 | <a href="#">LLNRMSSDDRHLGSSCGSFIK</a>   |                      |

Mascot: <http://www.matrixscience.com/>



# MATRIX SCIENCE Mascot Search Results

## Peptide View

MS/MS Fragmentation of **NNATVHEQVGGPSLTSDLQAQSK**

Found in **F5GX75** in **con\_Xuniprot\_HUMAN3**, F5GX75\_HUMAN Vitronectin (Fragment) OS=Homo sapiens GN=VTN PE=2 SV=2

Match to Query 21457: 2382.133812 from(795.051880,3+) intensity(18164.0273) rtinseconds(910) scans(2262) index(19413)

Title: 111019\_Est\_ML\_YP\_G\_09Spectrum1991\_scans\_\_2262

Data file C:\mascot\20140703\_Tmgf\_1D\CSV\_UseAnalysis\MasterCSV\All\_Glyco\mgf\ptm\UC18ERLIC\_PTM\_35D.mgf

Click mouse within plot area to zoom in by factor of two about that point

Or, to Da

Label all possible matches Label matches used for scoring

Show Y-axis

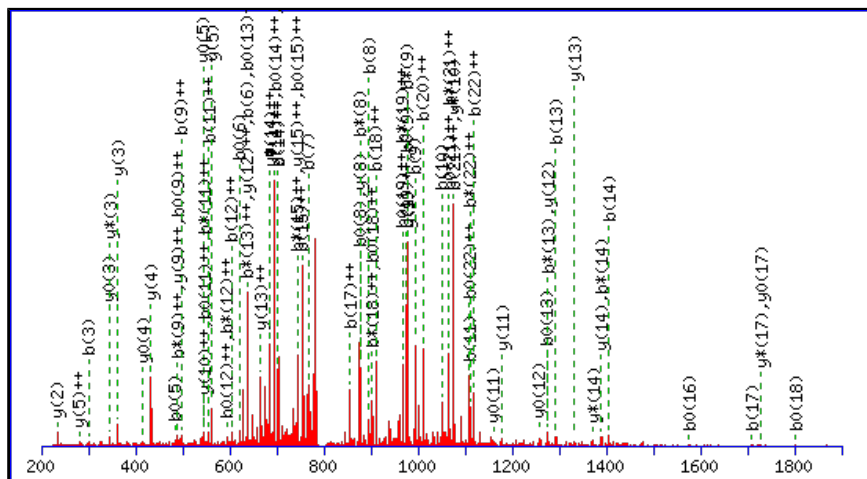

Monoisotopic mass of neutral peptide Mr(calc): 2382.1299

Fixed modifications: Carbamidomethyl (C) (apply to specified residues or termini only)

Variable modifications:

N2 : Deamidated (NQ)

Q19 : Deamidated (NQ)

Ions Score: 62 Expect: 0.00014

Matches : 81/256 fragment ions using 123 most intense peaks ([help](#))

| #  | b                | b <sup>++</sup>  | b <sup>*</sup>   | b <sup>*++</sup> | b <sup>0</sup>   | b <sup>0++</sup> | Seq. | y                | y <sup>++</sup> | y <sup>*</sup>   | y <sup>*++</sup> | y <sup>0</sup>   | y <sup>0++</sup> | #  |
|----|------------------|------------------|------------------|------------------|------------------|------------------|------|------------------|-----------------|------------------|------------------|------------------|------------------|----|
| 1  | 115.0502         | 58.0287          | 98.0237          | 49.5155          |                  |                  | N    |                  |                 |                  |                  |                  |                  | 23 |
| 2  | 230.0771         | 115.5422         | 213.0506         | 107.0289         |                  |                  | N    | 2269.0943        | 1135.0508       | 2252.0677        | 1126.5375        | 2251.0837        | 1126.0455        | 22 |
| 3  | <b>301.1143</b>  | 151.0608         | 284.0877         | 142.5475         |                  |                  | A    | 2154.0673        | 1077.5373       | 2137.0408        | 1069.0240        | 2136.0568        | 1068.5320        | 21 |
| 4  | 402.1619         | 201.5846         | 385.1354         | 193.0713         | 384.1514         | 192.5793         | T    | 2083.0302        | 1042.0187       | 2066.0037        | 1033.5055        | 2065.0196        | 1033.0135        | 20 |
| 5  | 501.2304         | 251.1188         | 484.2038         | 242.6055         | <b>483.2198</b>  | 242.1135         | V    | 1981.9825        | 991.4949        | 1964.9560        | 982.9816         | 1963.9720        | 982.4896         | 19 |
| 6  | <b>638.2893</b>  | 319.6483         | 621.2627         | 311.1350         | <b>620.2787</b>  | 310.6430         | H    | 1882.9141        | 941.9607        | 1865.8876        | 933.4474         | 1864.9035        | 932.9554         | 18 |
| 7  | <b>767.3319</b>  | 384.1696         | 750.3053         | 375.6563         | 749.3213         | 375.1643         | E    | 1745.8552        | 873.4312        | <b>1728.8287</b> | 864.9180         | <b>1727.8446</b> | 864.4260         | 17 |
| 8  | <b>895.3904</b>  | 448.1989         | <b>878.3639</b>  | 439.6856         | <b>877.3799</b>  | 439.1936         | Q    | 1616.8126        | 808.9099        | 1599.7861        | 800.3967         | 1598.8020        | 799.9047         | 16 |
| 9  | <b>994.4589</b>  | <b>497.7331</b>  | <b>977.4323</b>  | <b>489.2198</b>  | <b>976.4483</b>  | <b>488.7278</b>  | V    | 1488.7540        | <b>744.8807</b> | 1471.7275        | 736.3674         | 1470.7435        | 735.8754         | 15 |
| 10 | <b>1051.4803</b> | 526.2438         | 1034.4538        | 517.7305         | 1033.4697        | 517.2385         | G    | <b>1389.6856</b> | <b>695.3464</b> | <b>1372.6591</b> | <b>686.8332</b>  | 1371.6751        | <b>686.3412</b>  | 14 |
| 11 | <b>1108.5018</b> | <b>554.7545</b>  | 1091.4752        | <b>546.2413</b>  | 1090.4912        | <b>545.7492</b>  | G    | <b>1332.6642</b> | <b>666.8357</b> | 1315.6376        | 658.3224         | 1314.6536        | 657.8304         | 13 |
| 12 | 1205.5545        | <b>603.2809</b>  | 1188.5280        | <b>594.7676</b>  | 1187.5440        | <b>594.2756</b>  | P    | <b>1275.6427</b> | <b>638.3250</b> | 1258.6161        | 629.8117         | <b>1257.6321</b> | 629.3197         | 12 |
| 13 | <b>1292.5866</b> | 646.7969         | <b>1275.5600</b> | <b>638.2836</b>  | <b>1274.5760</b> | <b>637.7916</b>  | S    | <b>1178.5899</b> | 589.7986        | 1161.5634        | 581.2853         | <b>1160.5794</b> | 580.7933         | 11 |
| 14 | <b>1405.6706</b> | <b>703.3390</b>  | <b>1388.6441</b> | <b>694.8257</b>  | 1387.6601        | <b>694.3337</b>  | L    | 1091.5579        | <b>546.2826</b> | <b>1074.5313</b> | 537.7693         | 1073.5473        | 537.2773         | 10 |
| 15 | 1506.7183        | <b>753.8628</b>  | 1489.6918        | <b>745.3495</b>  | 1488.7077        | <b>744.8575</b>  | T    | <b>978.4738</b>  | <b>489.7406</b> | 961.4473         | 481.2273         | 960.4633         | 480.7353         | 9  |
| 16 | 1593.7503        | 797.3788         | 1576.7238        | 788.8655         | <b>1575.7398</b> | 788.3735         | S    | <b>877.4262</b>  | 439.2167        | 860.3996         | 430.7034         | 859.4156         | 430.2114         | 8  |
| 17 | <b>1708.7773</b> | <b>854.8923</b>  | 1691.7507        | 846.3790         | 1690.7667        | 845.8870         | D    | 790.3941         | 395.7007        | 773.3676         | 387.1874         | 772.3836         | 386.6954         | 7  |
| 18 | 1821.8613        | <b>911.4343</b>  | 1804.8348        | <b>902.9210</b>  | <b>1803.8508</b> | <b>902.4290</b>  | L    | 675.3672         | 338.1872        | 658.3406         | 329.6740         | 657.3566         | 329.1819         | 6  |
| 19 | 1950.9039        | <b>975.9556</b>  | 1933.8774        | <b>967.4423</b>  | 1932.8934        | <b>966.9503</b>  | Q    | <b>562.2831</b>  | <b>281.6452</b> | 545.2566         | 273.1319         | <b>544.2726</b>  | 272.6399         | 5  |
| 20 | 2021.9411        | <b>1011.4742</b> | 2004.9145        | 1002.9609        | 2003.9305        | 1002.4689        | A    | <b>433.2405</b>  | 217.1239        | 416.2140         | 208.6106         | <b>415.2300</b>  | 208.1186         | 4  |
| 21 | 2149.9996        | <b>1075.5035</b> | 2132.9731        | <b>1066.9902</b> | 2131.9891        | <b>1066.4982</b> | Q    | <b>362.2034</b>  | 181.6053        | <b>345.1769</b>  | 173.0921         | <b>344.1928</b>  | 172.6001         | 3  |
| 22 | 2237.0317        | <b>1119.0195</b> | 2220.0051        | <b>1110.5062</b> | 2219.0211        | <b>1110.0142</b> | S    | <b>234.1448</b>  | 117.5761        | 217.1183         | 109.0628         | 216.1343         | 108.5708         | 2  |



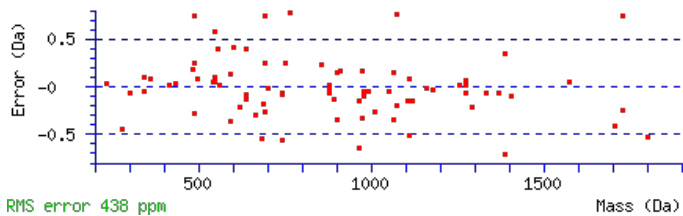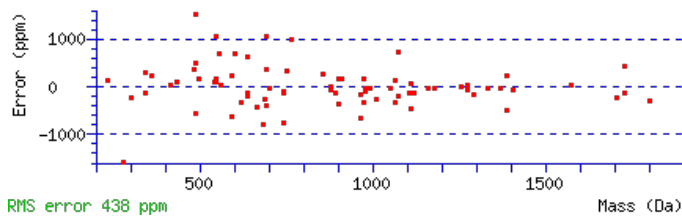

NCBI BLAST search of [NNATVHEQVGGPSLTSDLQAQSK](#)

(Parameters: blastp, nr protein database, expect=20000, no filter, PAM30)

Other BLAST [web gateways](#)

All matches to this query

| Score | Mr(calc)  | Delta  | Sequence                                | Site Analysis             |
|-------|-----------|--------|-----------------------------------------|---------------------------|
| 62.4  | 2382.1299 | 0.0039 | <a href="#">NNATVHEQVGGPSLTSDLQAQSK</a> | Deamidated N2, Q19 25.75% |
| 62.4  | 2382.1299 | 0.0039 | <a href="#">NNATVHEQVGGPSLTSDLQAQSK</a> | Deamidated N1, Q19 25.75% |
| 61.0  | 2382.1299 | 0.0039 | <a href="#">NNATVHEQVGGPSLTSDLQAQSK</a> | Deamidated N2, Q21 18.40% |
| 61.0  | 2382.1299 | 0.0039 | <a href="#">NNATVHEQVGGPSLTSDLQAQSK</a> | Deamidated N1, Q21 18.40% |
| 54.7  | 2382.1299 | 0.0039 | <a href="#">NNATVHEQVGGPSLTSDLQAQSK</a> | Deamidated N2, Q8 4.39%   |
| 54.7  | 2382.1299 | 0.0039 | <a href="#">NNATVHEQVGGPSLTSDLQAQSK</a> | Deamidated N1, Q8 4.39%   |
| 48.6  | 2382.1299 | 0.0039 | <a href="#">NNATVHEQVGGPSLTSDLQAQSK</a> | Deamidated Q8, Q19 1.08%  |
| 48.6  | 2382.1299 | 0.0039 | <a href="#">NNATVHEQVGGPSLTSDLQAQSK</a> | Deamidated N1, N2 1.07%   |
| 47.3  | 2382.1299 | 0.0039 | <a href="#">NNATVHEQVGGPSLTSDLQAQSK</a> | Deamidated Q8, Q21 0.79%  |
| 18.6  | 2382.1299 | 0.0039 | <a href="#">NNATVHEQVGGPSLTSDLQAQSK</a> | Deamidated Q19, Q21 0.00% |

Mascot: <http://www.matrixscience.com/>

# MATRIX SCIENCE Mascot Search Results

## Peptide View

MS/MS Fragmentation of **FEDGVLDPDYPRNISDGFDFGIPDNVDAALALPAHSYSGR**

Found in **P04004** in **con\_Xuniprot\_HUMAN3**, VTNC\_HUMAN Vitronectin OS=Homo sapiens GN=VTN PE=1 SV=1

Match to Query 28978: 4175.954096 from(1044.995800,4+) intensity(117478.6016) rtinseconds(2348) scans(6148) index(9758)

Title: 111019\_Est\_ISCardio\_NMI\_YS\_G\_5Spectrum5315\_scans\_\_6148

Data file C:\mascot\20140703\_Tmgf\_1D\CSV\_UseAnalysis\MasterCSV\All\_Glyco\mgf\ptm\UC18ERLIC\_PTM\_35D.mgf

Click mouse within plot area to zoom in by factor of two about that point

Or, to Da

Label all possible matches Label matches used for scoring

Show Y-axis

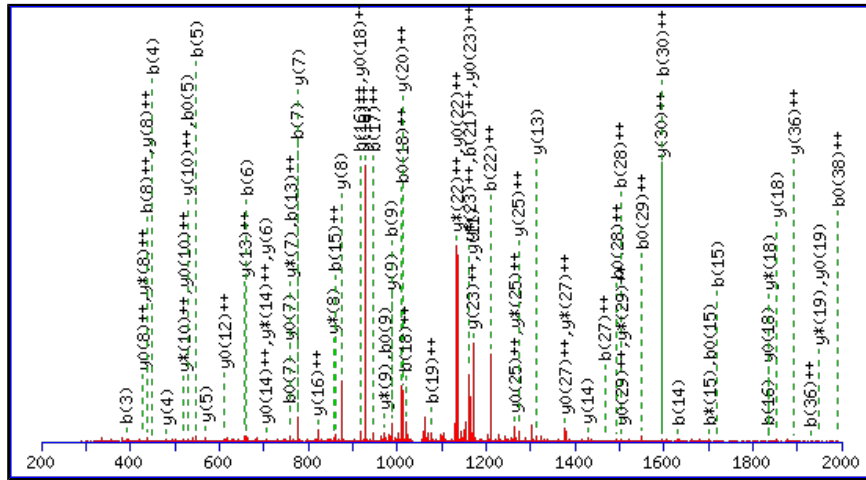

Monoisotopic mass of neutral peptide Mr(calc): 4175.9348

Fixed modifications: Carbamidomethyl (C) (apply to specified residues or termini only)

Variable modifications: N13 : Deamidated (NQ)

Ions Score: 61 Expect: 0.00015

Matches : 77/428 fragment ions using 138 most intense peaks ([help](#))

| #  | b                | b <sup>++</sup>  | b <sup>*</sup>   | b <sup>*++</sup> | b <sup>0</sup>   | b <sup>0++</sup> | Seq. | y                | y <sup>++</sup>  | y <sup>*</sup>   | y <sup>*++</sup> | y <sup>0</sup>   | y <sup>0++</sup> | #  |
|----|------------------|------------------|------------------|------------------|------------------|------------------|------|------------------|------------------|------------------|------------------|------------------|------------------|----|
| 1  | 148.0757         | 74.5415          |                  |                  |                  |                  | F    |                  |                  |                  |                  |                  |                  | 39 |
| 2  | 277.1183         | 139.0628         |                  |                  | 259.1077         | 130.0575         | E    | 4029.8737        | 2015.4405        | 4012.8472        | 2006.9272        | 4011.8631        | 2006.4352        | 38 |
| 3  | <b>392.1452</b>  | 196.5763         |                  |                  | 374.1347         | 187.5710         | D    | 3900.8311        | 1950.9192        | 3883.8046        | 1942.4059        | 3882.8206        | 1941.9139        | 37 |
| 4  | <b>449.1667</b>  | 225.0870         |                  |                  | 431.1561         | 216.0817         | G    | 3785.8042        | <b>1893.4057</b> | 3768.7776        | 1884.8925        | 3767.7936        | 1884.4004        | 36 |
| 5  | <b>548.2351</b>  | 274.6212         |                  |                  | <b>530.2245</b>  | 265.6159         | V    | 3728.7827        | 1864.8950        | 3711.7562        | 1856.3817        | 3710.7721        | 1855.8897        | 35 |
| 6  | <b>661.3192</b>  | 331.1632         |                  |                  | 643.3086         | 322.1579         | L    | 3629.7143        | 1815.3608        | 3612.6877        | 1806.8475        | 3611.7037        | 1806.3555        | 34 |
| 7  | <b>776.3461</b>  | 388.6767         |                  |                  | <b>758.3355</b>  | 379.6714         | D    | 3516.6302        | 1758.8188        | 3499.6037        | 1750.3055        | 3498.6197        | 1749.8135        | 33 |
| 8  | 873.3989         | <b>437.2031</b>  |                  |                  | 855.3883         | 428.1978         | P    | 3401.6033        | 1701.3053        | 3384.5767        | 1692.7920        | 3383.5927        | 1692.3000        | 32 |
| 9  | <b>988.4258</b>  | 494.7165         |                  |                  | <b>970.4153</b>  | 485.7113         | D    | 3304.5505        | 1652.7789        | 3287.5240        | 1644.2656        | 3286.5400        | 1643.7736        | 31 |
| 10 | 1151.4891        | 576.2482         |                  |                  | 1133.4786        | 567.2429         | Y    | 3189.5236        | <b>1595.2654</b> | 3172.4970        | 1586.7522        | 3171.5130        | 1586.2601        | 30 |
| 11 | 1248.5419        | 624.7746         |                  |                  | 1230.5313        | 615.7693         | P    | 3026.4603        | 1513.7338        | 3009.4337        | <b>1505.2205</b> | 3008.4497        | <b>1504.7285</b> | 29 |
| 12 | 1404.6430        | 702.8251         | 1387.6165        | 694.3119         | 1386.6325        | 693.8199         | R    | 2929.4075        | 1465.2074        | 2912.3809        | 1456.6941        | 2911.3969        | 1456.2021        | 28 |
| 13 | 1519.6700        | <b>760.3386</b>  | 1502.6434        | 751.8253         | 1501.6594        | 751.3333         | N    | 2773.3064        | 1387.1568        | 2756.2798        | <b>1378.6436</b> | 2755.2958        | <b>1378.1515</b> | 27 |
| 14 | <b>1632.7540</b> | 816.8807         | 1615.7275        | 808.3674         | 1614.7435        | 807.8754         | I    | 2658.2794        | 1329.6434        | 2641.2529        | 1321.1301        | 2640.2689        | 1320.6381        | 26 |
| 15 | <b>1719.7861</b> | <b>860.3967</b>  | <b>1702.7595</b> | 851.8834         | <b>1701.7755</b> | 851.3914         | S    | 2545.1954        | <b>1273.1013</b> | 2528.1688        | <b>1264.5880</b> | 2527.1848        | <b>1264.0960</b> | 25 |
| 16 | <b>1834.8130</b> | <b>917.9101</b>  | 1817.7865        | 909.3969         | 1816.8024        | 908.9049         | D    | 2458.1633        | 1229.5853        | 2441.1368        | 1221.0720        | 2440.1528        | 1220.5800        | 24 |
| 17 | 1891.8345        | <b>946.4209</b>  | 1874.8079        | 937.9076         | 1873.8239        | 937.4156         | G    | 2343.1364        | <b>1172.0718</b> | 2326.1099        | <b>1163.5586</b> | 2325.1258        | <b>1163.0666</b> | 23 |
| 18 | 2038.9029        | <b>1019.9551</b> | 2021.8763        | 1011.4418        | 2020.8923        | <b>1010.9498</b> | F    | 2286.1149        | 1143.5611        | 2269.0884        | <b>1135.0478</b> | 2268.1044        | <b>1134.5558</b> | 22 |
| 19 | 2153.9298        | <b>1077.4685</b> | 2136.9033        | 1068.9553        | 2135.9193        | 1068.4633        | D    | 2139.0465        | 1070.0269        | 2122.0200        | 1061.5136        | 2121.0360        | 1061.0216        | 21 |
| 20 | 2210.9513        | 1105.9793        | 2193.9247        | 1097.4660        | 2192.9407        | 1096.9740        | G    | 2024.0196        | <b>1012.5134</b> | 2006.9930        | 1004.0002        | 2006.0090        | 1003.5081        | 20 |
| 21 | 2324.0353        | <b>1162.5213</b> | 2307.0088        | 1154.0080        | 2306.0248        | 1153.5160        | I    | 1966.9981        | 984.0027         | <b>1949.9716</b> | 975.4894         | <b>1948.9876</b> | 974.9974         | 19 |
| 22 | 2421.0881        | <b>1211.0477</b> | 2404.0616        | 1202.5344        | 2403.0775        | 1202.0424        | P    | <b>1853.9141</b> | <b>927.4607</b>  | <b>1836.8875</b> | 918.9474         | <b>1835.9035</b> | <b>918.4554</b>  | 18 |
| 23 | 2536.1151        | 1268.5612        | 2519.0885        | 1260.0479        | 2518.1045        | 1259.5559        | D    | 1756.8613        | 878.9343         | 1739.8347        | 870.4210         | 1738.8507        | 869.9290         | 17 |

|    |           |           |           |           |           |           |   |           |          |           |          |           |          |    |
|----|-----------|-----------|-----------|-----------|-----------|-----------|---|-----------|----------|-----------|----------|-----------|----------|----|
| 24 | 2650.1580 | 1325.5826 | 2633.1314 | 1317.0694 | 2632.1474 | 1316.5773 | N | 1641.8343 | 821.4208 | 1624.8078 | 812.9075 | 1623.8238 | 812.4155 | 16 |
| 25 | 2749.2264 | 1375.1168 | 2732.1998 | 1366.6036 | 2731.2158 | 1366.1116 | V | 1527.7914 | 764.3993 | 1510.7649 | 755.8861 | 1509.7809 | 755.3941 | 15 |
| 26 | 2864.2533 | 1432.6303 | 2847.2268 | 1424.1170 | 2846.2428 | 1423.6250 | D | 1428.7230 | 714.8651 | 1411.6965 | 706.3519 | 1410.7124 | 705.8599 | 14 |
| 27 | 2935.2905 | 1468.1489 | 2918.2639 | 1459.6356 | 2917.2799 | 1459.1436 | A | 1313.6961 | 657.3517 | 1296.6695 | 648.8384 | 1295.6855 | 648.3464 | 13 |
| 28 | 3006.3276 | 1503.6674 | 2989.3010 | 1495.1541 | 2988.3170 | 1494.6621 | A | 1242.6589 | 621.8331 | 1225.6324 | 613.3198 | 1224.6484 | 612.8278 | 12 |
| 29 | 3119.4116 | 1560.2095 | 3102.3851 | 1551.6962 | 3101.4011 | 1551.2042 | L | 1171.6218 | 586.3146 | 1154.5953 | 577.8013 | 1153.6113 | 577.3093 | 11 |
| 30 | 3190.4487 | 1595.7280 | 3173.4222 | 1587.2147 | 3172.4382 | 1586.7227 | A | 1058.5378 | 529.7725 | 1041.5112 | 521.2592 | 1040.5272 | 520.7672 | 10 |
| 31 | 3303.5328 | 1652.2700 | 3286.5063 | 1643.7568 | 3285.5222 | 1643.2648 | L | 987.5007  | 494.2540 | 970.4741  | 485.7407 | 969.4901  | 485.2487 | 9  |
| 32 | 3400.5856 | 1700.7964 | 3383.5590 | 1692.2832 | 3382.5750 | 1691.7911 | P | 874.4166  | 437.7119 | 857.3900  | 429.1987 | 856.4060  | 428.7067 | 8  |
| 33 | 3471.6227 | 1736.3150 | 3454.5961 | 1727.8017 | 3453.6121 | 1727.3097 | A | 777.3638  | 389.1856 | 760.3373  | 380.6723 | 759.3533  | 380.1803 | 7  |
| 34 | 3608.6816 | 1804.8444 | 3591.6551 | 1796.3312 | 3590.6710 | 1795.8392 | H | 706.3267  | 353.6670 | 689.3002  | 345.1537 | 688.3161  | 344.6617 | 6  |
| 35 | 3695.7136 | 1848.3605 | 3678.6871 | 1839.8472 | 3677.7031 | 1839.3552 | S | 569.2678  | 285.1375 | 552.2413  | 276.6243 | 551.2572  | 276.1323 | 5  |
| 36 | 3858.7770 | 1929.8921 | 3841.7504 | 1921.3788 | 3840.7664 | 1920.8868 | Y | 482.2358  | 241.6215 | 465.2092  | 233.1083 | 464.2252  | 232.6162 | 4  |
| 37 | 3945.8090 | 1973.4081 | 3928.7824 | 1964.8949 | 3927.7984 | 1964.4028 | S | 319.1724  | 160.0899 | 302.1459  | 151.5766 | 301.1619  | 151.0846 | 3  |
| 38 | 4002.8304 | 2001.9189 | 3985.8039 | 1993.4056 | 3984.8199 | 1992.9136 | G | 232.1404  | 116.5738 | 215.1139  | 108.0606 |           |          | 2  |
| 39 |           |           |           |           |           |           | R | 175.1190  | 88.0631  | 158.0924  | 79.5498  |           |          | 1  |

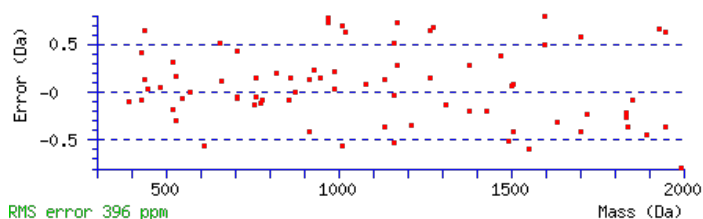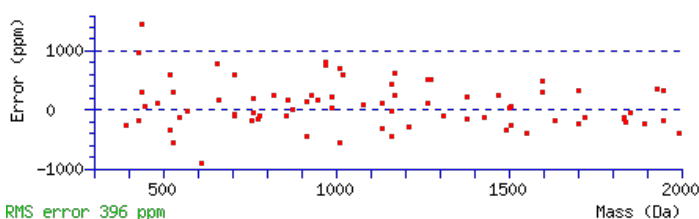

NCBI BLAST search of [FEDGVLDPDYPRNISDGFEDGIPDNVDAALALPAHSYSGR](#)

(Parameters: blastp, nr protein database, expect=20000, no filter, PAM30)

Other BLAST [web gateways](#)

All matches to this query

| Score | Mr(calc)  | Delta   | Sequence                                                 | Site Analysis         |
|-------|-----------|---------|----------------------------------------------------------|-----------------------|
| 61.1  | 4175.9348 | 0.0193  | <a href="#">FEDGVLDPDYPRNISDGFEDGIPDNVDAALALPAHSYSGR</a> | Deamidated N13 52.36% |
| 60.7  | 4175.9348 | 0.0193  | <a href="#">FEDGVLDPDYPRNISDGFEDGIPDNVDAALALPAHSYSGR</a> | Deamidated N24 47.64% |
| 49.8  | 4174.9508 | 1.0033  | <a href="#">FEDGVLDPDYPRNISDGFEDGIPDNVDAALALPAHSYSGR</a> |                       |
| 11.0  | 4174.9699 | 0.9842  | <a href="#">LIALMEDSDSNQDVTESQKSKPLKNPKPNDIASDSSNR</a>   |                       |
| 10.9  | 4175.9574 | -0.0033 | <a href="#">LSDLNHWQVGAMTVNQGYYLHYDFEYIKNFKSLGER</a>     |                       |
| 10.9  | 4175.9574 | -0.0033 | <a href="#">LSDLNHWQVGAMTVNQGYYLHYDFEYIKNFKSLGER</a>     |                       |
| 10.9  | 4175.9574 | -0.0033 | <a href="#">LSDLNHWQVGAMTVNQGYYLHYDFEYIKNFKSLGER</a>     |                       |
| 10.9  | 4175.9574 | -0.0033 | <a href="#">LSDLNHWQVGAMTVNQGYYLHYDFEYIKNFKSLGER</a>     |                       |
| 9.3   | 4174.9699 | 0.9842  | <a href="#">LIALMEDSDSNQDVTESQKSKPLKNPKPNDIASDSSNR</a>   |                       |
| 8.7   | 4174.9699 | 0.9842  | <a href="#">LIALMEDSDSNQDVTESQKSKPLKNPKPNDIASDSSNR</a>   |                       |

Mascot: <http://www.matrixscience.com/>

# MATRIX SCIENCE Mascot Search Results

## Peptide View

MS/MS Fragmentation of **NNATVHEQVGGPSLTSDLQAQSK**

Found in **F5GX75** in **con\_Xuniprot\_HUMAN3**, F5GX75\_HUMAN Vitronectin (Fragment) OS=Homo sapiens GN=VTN PE=2 SV=2

Match to Query 21460: 2382.136542 from(795.052790,3+) intensity(280292.8438) rtinseconds(890) scans(2148) index(4280)

Title: 111019\_Est\_ISCardio\_NMI\_YP\_G\_7Spectrum1870\_scans\_\_2148

Data file C:\mascot\20140703\_Tmgf\_1D\CSV\_UseAnalysis\MasterCSV\All\_Glyco\mgf\ptm\UC18ERLIC\_PTM\_35D.mgf

Click mouse within plot area to zoom in by factor of two about that point

Or,  to  Da

Label all possible matches  Label matches used for scoring

Show Y-axis

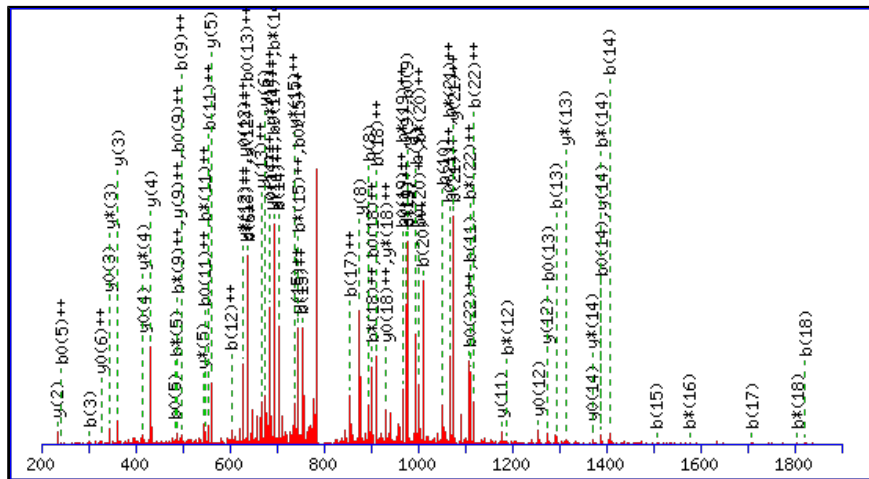

Monoisotopic mass of neutral peptide Mr(calc): 2382.1299

Fixed modifications: Carbamidomethyl (C) (apply to specified residues or termini only)

Variable modifications:

N1 : Deamidated (NQ)

N2 : Deamidated (NQ)

Ions Score: 60 Expect: 0.00026

Matches : 86/256 fragment ions using 137 most intense peaks ([help](#))

| #  | b                | b <sup>++</sup>  | b <sup>*</sup>   | b <sup>*++</sup> | b <sup>0</sup>   | b <sup>0++</sup> | Seq. | y                | y <sup>++</sup>  | y <sup>*</sup>   | y <sup>*++</sup> | y <sup>0</sup>   | y <sup>0++</sup> | #  |
|----|------------------|------------------|------------------|------------------|------------------|------------------|------|------------------|------------------|------------------|------------------|------------------|------------------|----|
| 1  | 116.0342         | 58.5207          | 99.0077          | 50.0075          |                  |                  | N    |                  |                  |                  |                  |                  |                  | 23 |
| 2  | 231.0612         | 116.0342         | 214.0346         | 107.5209         |                  |                  | N    | 2268.1102        | 1134.5588        | 2251.0837        | 1126.0455        | 2250.0997        | 1125.5535        | 22 |
| 3  | <b>302.0983</b>  | 151.5528         | 285.0717         | 143.0395         |                  |                  | A    | 2153.0833        | <b>1077.0453</b> | 2136.0568        | 1068.5320        | 2135.0727        | 1068.0400        | 21 |
| 4  | 403.1460         | 202.0766         | 386.1194         | 193.5633         | 385.1354         | 193.0713         | T    | 2082.0462        | 1041.5267        | 2065.0196        | 1033.0135        | 2064.0356        | 1032.5215        | 20 |
| 5  | 502.2144         | 251.6108         | <b>485.1878</b>  | 243.0975         | <b>484.2038</b>  | <b>242.6055</b>  | V    | 1980.9985        | 991.0029         | 1963.9720        | 982.4896         | 1962.9879        | 981.9976         | 19 |
| 6  | <b>639.2733</b>  | 320.1403         | 622.2467         | 311.6270         | 621.2627         | 311.1350         | H    | 1881.9301        | 941.4687         | 1864.9035        | <b>932.9554</b>  | 1863.9195        | <b>932.4634</b>  | 18 |
| 7  | 768.3159         | 384.6616         | 751.2893         | 376.1483         | 750.3053         | 375.6563         | E    | 1744.8712        | 872.9392         | 1727.8446        | 864.4260         | 1726.8606        | 863.9339         | 17 |
| 8  | <b>896.3745</b>  | 448.6909         | 879.3479         | 440.1776         | 878.3639         | 439.6856         | Q    | 1615.8286        | 808.4179         | 1598.8020        | 799.9047         | 1597.8180        | 799.4127         | 16 |
| 9  | <b>995.4429</b>  | <b>498.2251</b>  | <b>978.4163</b>  | <b>489.7118</b>  | <b>977.4323</b>  | <b>489.2198</b>  | V    | 1487.7700        | <b>744.3886</b>  | 1470.7435        | <b>735.8754</b>  | 1469.7594        | 735.3834         | 15 |
| 10 | <b>1052.4643</b> | 526.7358         | 1035.4378        | 518.2225         | 1034.4538        | 517.7305         | G    | <b>1388.7016</b> | <b>694.8544</b>  | <b>1371.6751</b> | <b>686.3412</b>  | <b>1370.6910</b> | <b>685.8492</b>  | 14 |
| 11 | <b>1109.4858</b> | <b>555.2465</b>  | 1092.4592        | <b>546.7333</b>  | 1091.4752        | <b>546.2413</b>  | G    | 1331.6801        | <b>666.3437</b>  | <b>1314.6536</b> | 657.8304         | 1313.6696        | 657.3384         | 13 |
| 12 | 1206.5386        | <b>603.7729</b>  | <b>1189.5120</b> | 595.2596         | 1188.5280        | 594.7676         | P    | <b>1274.6587</b> | <b>637.8330</b>  | 1257.6321        | <b>629.3197</b>  | <b>1256.6481</b> | <b>628.8277</b>  | 12 |
| 13 | <b>1293.5706</b> | 647.2889         | 1276.5440        | <b>638.7757</b>  | <b>1275.5600</b> | <b>638.2836</b>  | S    | <b>1177.6059</b> | 589.3066         | 1160.5794        | 580.7933         | 1159.5953        | 580.3013         | 11 |
| 14 | <b>1406.6546</b> | <b>703.8310</b>  | <b>1389.6281</b> | <b>695.3177</b>  | <b>1388.6441</b> | <b>694.8257</b>  | L    | 1090.5739        | 545.7906         | 1073.5473        | 537.2773         | 1072.5633        | 536.7853         | 10 |
| 15 | <b>1507.7023</b> | <b>754.3548</b>  | 1490.6758        | <b>745.8415</b>  | 1489.6918        | <b>745.3495</b>  | T    | <b>977.4898</b>  | <b>489.2485</b>  | 960.4633         | 480.7353         | 959.4793         | 480.2433         | 9  |
| 16 | 1594.7344        | 797.8708         | <b>1577.7078</b> | 789.3575         | 1576.7238        | 788.8655         | S    | <b>876.4421</b>  | 438.7247         | 859.4156         | 430.2114         | 858.4316         | 429.7194         | 8  |
| 17 | <b>1709.7613</b> | <b>855.3843</b>  | 1692.7348        | 846.8710         | 1691.7507        | 846.3790         | D    | 789.4101         | 395.2087         | 772.3836         | 386.6954         | 771.3995         | 386.2034         | 7  |
| 18 | <b>1822.8454</b> | <b>911.9263</b>  | 1805.8188        | <b>903.4130</b>  | 1804.8348        | <b>902.9210</b>  | L    | <b>674.3832</b>  | 337.6952         | 657.3566         | 329.1819         | 656.3726         | <b>328.6899</b>  | 6  |
| 19 | 1950.9039        | <b>975.9556</b>  | 1933.8774        | <b>967.4423</b>  | 1932.8934        | <b>966.9503</b>  | Q    | <b>561.2991</b>  | 281.1532         | <b>544.2726</b>  | 272.6399         | 543.2885         | 272.1479         | 5  |
| 20 | 2021.9411        | <b>1011.4742</b> | 2004.9145        | <b>1002.9609</b> | 2003.9305        | <b>1002.4689</b> | A    | <b>433.2405</b>  | 217.1239         | <b>416.2140</b>  | 208.6106         | <b>415.2300</b>  | 208.1186         | 4  |
| 21 | 2149.9996        | <b>1075.5035</b> | 2132.9731        | <b>1066.9902</b> | 2131.9891        | <b>1066.4982</b> | Q    | <b>362.2034</b>  | 181.6053         | <b>345.1769</b>  | 173.0921         | <b>344.1928</b>  | 172.6001         | 3  |
| 22 | 2237.0317        | <b>1119.0195</b> | 2220.0051        | <b>1110.5062</b> | 2219.0211        | <b>1110.0142</b> | S    | <b>234.1448</b>  | 117.5761         | 217.1183         | 109.0628         | 216.1343         | 108.5708         | 2  |

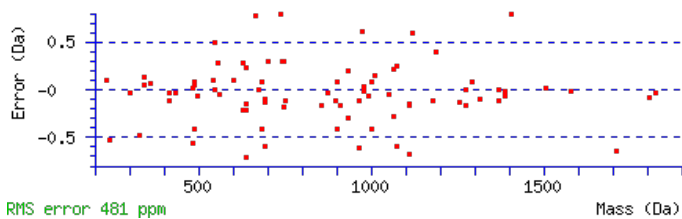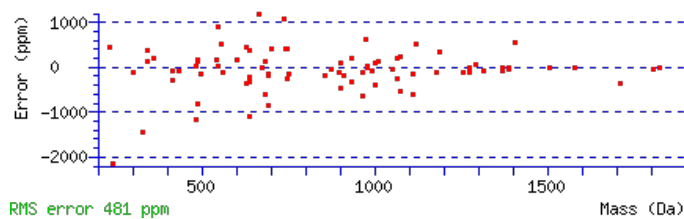

NCBI BLAST search of [NNATVHEQVGGPSLTSDLQAQSK](#)

(Parameters: blastp, nr protein database, expect=20000, no filter, PAM30)

Other BLAST [web gateways](#)

All matches to this query

| Score | Mr(calc)  | Delta   | Sequence                                | Site Analysis            |
|-------|-----------|---------|-----------------------------------------|--------------------------|
| 59.8  | 2382.1299 | 0.0066  | <a href="#">NNATVHEQVGGPSLTSDLQAQSK</a> | Deamidated N1, N2 79.15% |
| 49.2  | 2382.1299 | 0.0066  | <a href="#">NNATVHEQVGGPSLTSDLQAQSK</a> | Deamidated N2, Q8 6.86%  |
| 49.2  | 2382.1299 | 0.0066  | <a href="#">NNATVHEQVGGPSLTSDLQAQSK</a> | Deamidated N1, Q8 6.86%  |
| 42.5  | 2382.1299 | 0.0066  | <a href="#">NNATVHEQVGGPSLTSDLQAQSK</a> | Deamidated N2, Q19 1.47% |
| 42.5  | 2382.1299 | 0.0066  | <a href="#">NNATVHEQVGGPSLTSDLQAQSK</a> | Deamidated N1, Q19 1.47% |
| 42.0  | 2382.1299 | 0.0066  | <a href="#">NNATVHEQVGGPSLTSDLQAQSK</a> | Deamidated Q8, Q19 1.30% |
| 40.8  | 2382.1299 | 0.0066  | <a href="#">NNATVHEQVGGPSLTSDLQAQSK</a> | Deamidated N2, Q21 1.00% |
| 40.8  | 2382.1299 | 0.0066  | <a href="#">NNATVHEQVGGPSLTSDLQAQSK</a> | Deamidated N1, Q21 1.00% |
| 40.3  | 2382.1299 | 0.0066  | <a href="#">NNATVHEQVGGPSLTSDLQAQSK</a> | Deamidated Q8, Q21 0.88% |
| 7.9   | 2382.1478 | -0.0113 | <a href="#">NVSLIAQFTDDYFKQLTGQSAP</a>  |                          |

Mascot: <http://www.matrixscience.com/>

# MATRIX SCIENCE Mascot Search Results

## Peptide View

MS/MS Fragmentation of **NNATVHEQVGGPSLTSDLQAQSK**

Found in **F5GX75** in **con\_Xuniprot\_HUMAN3**, F5GX75\_HUMAN Vitronectin (Fragment) OS=Homo sapiens GN=VTN PE=2 SV=2

Match to Query 21454: 2382.132582 from(795.051470,3+) intensity(53558.9688) rtinseconds(788) scans(1827) index(18345)

Title: 111019\_Est\_MI\_YP\_G\_08Spectrum1602\_scans\_\_1827

Data file C:\mascot\20140703\_Tmgf\_1D\CSV\_UseAnalysis\MasterCSV\All\_Glyco\mgf\ptm\UC18ERLIC\_PTM\_35D.mgf

Click mouse within plot area to zoom in by factor of two about that point

Or,  to  Da

Label all possible matches  Label matches used for scoring

Show Y-axis

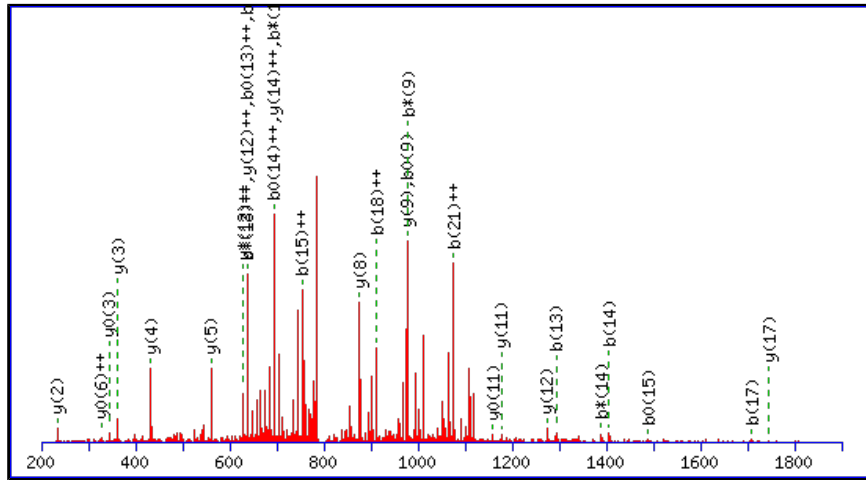

Monoisotopic mass of neutral peptide Mr(calc): 2382.1299

Fixed modifications: Carbamidomethyl (C) (apply to specified residues or termini only)

Variable modifications:

N2 : Deamidated (NQ)

Q8 : Deamidated (NQ)

Ions Score: 59 Expect: 0.00029

Matches : 30/256 fragment ions using 32 most intense peaks ([help](#))

| #  | b                | b <sup>++</sup>  | b <sup>*</sup>   | b <sup>*++</sup> | b <sup>0</sup>   | b <sup>0++</sup> | Seq. | y                | y <sup>++</sup> | y <sup>*</sup> | y <sup>*++</sup> | y <sup>0</sup>   | y <sup>0++</sup> | #  |
|----|------------------|------------------|------------------|------------------|------------------|------------------|------|------------------|-----------------|----------------|------------------|------------------|------------------|----|
| 1  | 115.0502         | 58.0287          | 98.0237          | 49.5155          |                  |                  | N    |                  |                 |                |                  |                  |                  | 23 |
| 2  | 230.0771         | 115.5422         | 213.0506         | 107.0289         |                  |                  | N    | 2269.0943        | 1135.0508       | 2252.0677      | 1126.5375        | 2251.0837        | 1126.0455        | 22 |
| 3  | 301.1143         | 151.0608         | 284.0877         | 142.5475         |                  |                  | A    | 2154.0673        | 1077.5373       | 2137.0408      | 1069.0240        | 2136.0568        | 1068.5320        | 21 |
| 4  | 402.1619         | 201.5846         | 385.1354         | 193.0713         | 384.1514         | 192.5793         | T    | 2083.0302        | 1042.0187       | 2066.0037      | 1033.5055        | 2065.0196        | 1033.0135        | 20 |
| 5  | 501.2304         | 251.1188         | 484.2038         | 242.6055         | 483.2198         | 242.1135         | V    | 1981.9825        | 991.4949        | 1964.9560      | 982.9816         | 1963.9720        | 982.4896         | 19 |
| 6  | <b>638.2893</b>  | 319.6483         | 621.2627         | 311.1350         | 620.2787         | 310.6430         | H    | 1882.9141        | 941.9607        | 1865.8876      | 933.4474         | 1864.9035        | 932.9554         | 18 |
| 7  | 767.3319         | 384.1696         | 750.3053         | 375.6563         | 749.3213         | 375.1643         | E    | <b>1745.8552</b> | 873.4312        | 1728.8287      | 864.9180         | 1727.8446        | 864.4260         | 17 |
| 8  | 896.3745         | 448.6909         | 879.3479         | 440.1776         | 878.3639         | 439.6856         | Q    | 1616.8126        | 808.9099        | 1599.7861      | 800.3967         | 1598.8020        | 799.9047         | 16 |
| 9  | 995.4429         | 498.2251         | <b>978.4163</b>  | 489.7118         | <b>977.4323</b>  | 489.2198         | V    | 1487.7700        | 744.3886        | 1470.7435      | 735.8754         | 1469.7594        | 735.3834         | 15 |
| 10 | 1052.4643        | 526.7358         | 1035.4378        | 518.2225         | 1034.4538        | 517.7305         | G    | 1388.7016        | <b>694.8544</b> | 1371.6751      | 686.3412         | 1370.6910        | 685.8492         | 14 |
| 11 | 1109.4858        | 555.2465         | 1092.4592        | 546.7333         | 1091.4752        | 546.2413         | G    | 1331.6801        | 666.3437        | 1314.6536      | 657.8304         | 1313.6696        | 657.3384         | 13 |
| 12 | 1206.5386        | 603.7729         | 1189.5120        | 595.2596         | 1188.5280        | 594.7676         | P    | <b>1274.6587</b> | <b>637.8330</b> | 1257.6321      | <b>629.3197</b>  | 1256.6481        | 628.8277         | 12 |
| 13 | <b>1293.5706</b> | 647.2889         | 1276.5440        | <b>638.7757</b>  | 1275.5600        | <b>638.2836</b>  | S    | <b>1177.6059</b> | 589.3066        | 1160.5794      | 580.7933         | <b>1159.5953</b> | 580.3013         | 11 |
| 14 | <b>1406.6546</b> | 703.8310         | <b>1389.6281</b> | <b>695.3177</b>  | 1388.6441        | <b>694.8257</b>  | L    | 1090.5739        | 545.7906        | 1073.5473      | 537.2773         | 1072.5633        | 536.7853         | 10 |
| 15 | 1507.7023        | <b>754.3548</b>  | 1490.6758        | 745.8415         | <b>1489.6918</b> | 745.3495         | T    | <b>977.4898</b>  | 489.2485        | 960.4633       | 480.7353         | 959.4793         | 480.2433         | 9  |
| 16 | 1594.7344        | 797.8708         | 1577.7078        | 789.3575         | 1576.7238        | 788.8655         | S    | <b>876.4421</b>  | 438.7247        | 859.4156       | 430.2114         | 858.4316         | 429.7194         | 8  |
| 17 | <b>1709.7613</b> | 855.3843         | 1692.7348        | 846.8710         | 1691.7507        | 846.3790         | D    | 789.4101         | 395.2087        | 772.3836       | 386.6954         | 771.3995         | 386.2034         | 7  |
| 18 | 1822.8454        | <b>911.9263</b>  | 1805.8188        | 903.4130         | 1804.8348        | 902.9210         | L    | 674.3832         | 337.6952        | 657.3566       | 329.1819         | 656.3726         | <b>328.6899</b>  | 6  |
| 19 | 1950.9039        | 975.9556         | 1933.8774        | 967.4423         | 1932.8934        | 966.9503         | Q    | <b>561.2991</b>  | 281.1532        | 544.2726       | 272.6399         | 543.2885         | 272.1479         | 5  |
| 20 | 2021.9411        | 1011.4742        | 2004.9145        | 1002.9609        | 2003.9305        | 1002.4689        | A    | <b>433.2405</b>  | 217.1239        | 416.2140       | 208.6106         | 415.2300         | 208.1186         | 4  |
| 21 | 2149.9996        | <b>1075.5035</b> | 2132.9731        | 1066.9902        | 2131.9891        | 1066.4982        | Q    | <b>362.2034</b>  | 181.6053        | 345.1769       | 173.0921         | <b>344.1928</b>  | 172.6001         | 3  |
| 22 | 2237.0317        | 1119.0195        | 2220.0051        | 1110.5062        | 2219.0211        | 1110.0142        | S    | <b>234.1448</b>  | 117.5761        | 217.1183       | 109.0628         | 216.1343         | 108.5708         | 2  |

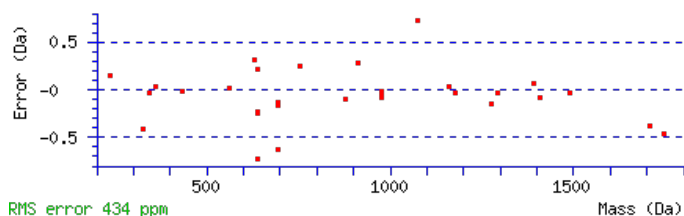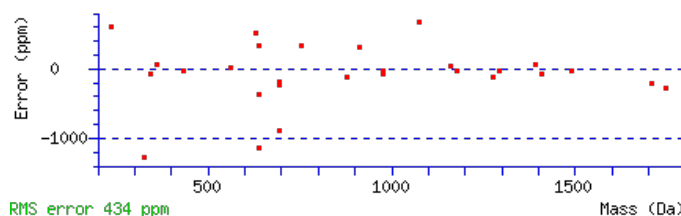

NCBI BLAST search of [NNATVHEQVGGPSLTSDLQAQSK](#)

(Parameters: blastp, nr protein database, expect=20000, no filter, PAM30)

Other BLAST [web gateways](#)

**All matches to this query**

| Score | Mr(calc)  | Delta  | Sequence                                | Site Analysis            |
|-------|-----------|--------|-----------------------------------------|--------------------------|
| 59.5  | 2382.1299 | 0.0027 | <a href="#">NNATVHEQVGGPSLTSDLQAQSK</a> | Deamidated N2, Q8 30.84% |
| 59.5  | 2382.1299 | 0.0027 | <a href="#">NNATVHEQVGGPSLTSDLQAQSK</a> | Deamidated N1, Q8 30.84% |
| 59.5  | 2382.1299 | 0.0027 | <a href="#">NNATVHEQVGGPSLTSDLQAQSK</a> | Deamidated N1, N2 30.84% |
| 47.3  | 2382.1299 | 0.0027 | <a href="#">NNATVHEQVGGPSLTSDLQAQSK</a> | Deamidated Q8, Q19 1.87% |
| 46.0  | 2382.1299 | 0.0027 | <a href="#">NNATVHEQVGGPSLTSDLQAQSK</a> | Deamidated Q8, Q21 1.40% |
| 46.0  | 2382.1299 | 0.0027 | <a href="#">NNATVHEQVGGPSLTSDLQAQSK</a> | Deamidated N2, Q19 1.39% |
| 46.0  | 2382.1299 | 0.0027 | <a href="#">NNATVHEQVGGPSLTSDLQAQSK</a> | Deamidated N1, Q19 1.39% |
| 43.1  | 2382.1299 | 0.0027 | <a href="#">NNATVHEQVGGPSLTSDLQAQSK</a> | Deamidated N2, Q21 0.71% |
| 43.1  | 2382.1299 | 0.0027 | <a href="#">NNATVHEQVGGPSLTSDLQAQSK</a> | Deamidated N1, Q21 0.71% |
| 7.0   | 2380.1308 | 2.0018 | <a href="#">FYGRFAESENQOVERHQVAR</a>    |                          |

Mascot: <http://www.matrixscience.com/>



# MASCOT SCIENCE Mascot Search Results

## Peptide View

MS/MS Fragmentation of **NISDGFDPDNDVAALALPAHSYSGR**

Found in **P04004** in **con\_Xuniprot\_HUMAN3**, VTNC\_HUMAN Vitronectin OS=Homo sapiens GN=VTN PE=1 SV=1

Match to Query 25469: 2772.296082 from(925.105970,3+) intensity(9836.7295) rtinseconds(2194) scans(5644) index(3940)

Title: 111019\_Est\_ISCardio\_NMI\_YP\_G\_6Spectrum4611\_scans\_\_5644

Data file C:\mascot\20140703\_Tmgf\_1D\CSV\_UseAnalysis\MasterCSV\All\_Glyco\mgf\ptm\UC18ERLIC\_PTM\_35D.mgf

Click mouse within plot area to zoom in by factor of two about that point

Or, to Da

Label all possible matches Label matches used for scoring

Show Y-axis

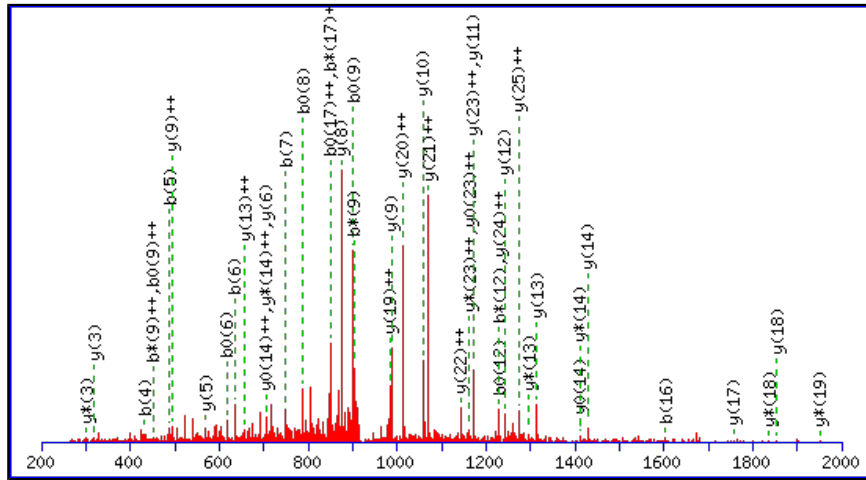

Monoisotopic mass of neutral peptide Mr(calc): 2772.2991

Fixed modifications: Carbamidomethyl (C) (apply to specified residues or termini only)

Variable modifications:

N1 : Deamidated (NQ)

Ions Score: 47 Expect: 0.0041

Matches : 46/304 fragment ions using 115 most intense peaks ([help](#))

| #  | b         | b <sup>++</sup> | b <sup>*</sup> | b <sup>*++</sup> | b <sup>0</sup> | b <sup>0++</sup> | Seq. | y         | y <sup>++</sup> | y <sup>*</sup> | y <sup>*++</sup> | y <sup>0</sup> | y <sup>0++</sup> | #  |
|----|-----------|-----------------|----------------|------------------|----------------|------------------|------|-----------|-----------------|----------------|------------------|----------------|------------------|----|
| 1  | 116.0342  | 58.5207         | 99.0077        | 50.0075          |                |                  | N    |           |                 |                |                  |                |                  | 27 |
| 2  | 229.1183  | 115.0628        | 212.0917       | 106.5495         |                |                  | I    | 2658.2794 | 1329.6434       | 2641.2529      | 1321.1301        | 2640.2689      | 1320.6381        | 26 |
| 3  | 316.1503  | 158.5788        | 299.1238       | 150.0655         | 298.1397       | 149.5735         | S    | 2545.1954 | 1273.1013       | 2528.1688      | 1264.5880        | 2527.1848      | 1264.0960        | 25 |
| 4  | 431.1773  | 216.0923        | 414.1507       | 207.5790         | 413.1667       | 207.0870         | D    | 2458.1633 | 1229.5853       | 2441.1368      | 1221.0720        | 2440.1528      | 1220.5800        | 24 |
| 5  | 488.1987  | 244.6030        | 471.1722       | 236.0897         | 470.1882       | 235.5977         | G    | 2343.1364 | 1172.0718       | 2326.1099      | 1163.5586        | 2325.1258      | 1163.0666        | 23 |
| 6  | 635.2671  | 318.1372        | 618.2406       | 309.6239         | 617.2566       | 309.1319         | F    | 2286.1149 | 1143.5611       | 2269.0884      | 1135.0478        | 2268.1044      | 1134.5558        | 22 |
| 7  | 750.2941  | 375.6507        | 733.2675       | 367.1374         | 732.2835       | 366.6454         | D    | 2139.0465 | 1070.0269       | 2122.0200      | 1061.5136        | 2121.0360      | 1061.0216        | 21 |
| 8  | 807.3155  | 404.1614        | 790.2890       | 395.6481         | 789.3050       | 395.1561         | G    | 2024.0196 | 1012.5134       | 2006.9930      | 1004.0002        | 2006.0090      | 1003.5081        | 20 |
| 9  | 920.3996  | 460.7034        | 903.3731       | 452.1902         | 902.3890       | 451.6982         | I    | 1966.9981 | 984.0027        | 1949.9716      | 975.4894         | 1948.9876      | 974.9974         | 19 |
| 10 | 1017.4524 | 509.2298        | 1000.4258      | 500.7165         | 999.4418       | 500.2245         | P    | 1853.9141 | 927.4607        | 1836.8875      | 918.9474         | 1835.9035      | 918.4554         | 18 |
| 11 | 1132.4793 | 566.7433        | 1115.4528      | 558.2300         | 1114.4687      | 557.7380         | D    | 1756.8613 | 878.9343        | 1739.8347      | 870.4210         | 1738.8507      | 869.9290         | 17 |
| 12 | 1246.5222 | 623.7648        | 1229.4957      | 615.2515         | 1228.5117      | 614.7595         | N    | 1641.8343 | 821.4208        | 1624.8078      | 812.9075         | 1623.8238      | 812.4155         | 16 |
| 13 | 1345.5907 | 673.2990        | 1328.5641      | 664.7857         | 1327.5801      | 664.2937         | V    | 1527.7914 | 764.3993        | 1510.7649      | 755.8861         | 1509.7809      | 755.3941         | 15 |
| 14 | 1460.6176 | 730.8124        | 1443.5910      | 722.2992         | 1442.6070      | 721.8072         | D    | 1428.7230 | 714.8651        | 1411.6965      | 706.3519         | 1410.7124      | 705.8599         | 14 |
| 15 | 1531.6547 | 766.3310        | 1514.6282      | 757.8177         | 1513.6441      | 757.3257         | A    | 1313.6961 | 657.3517        | 1296.6695      | 648.8384         | 1295.6855      | 648.3464         | 13 |
| 16 | 1602.6918 | 801.8495        | 1585.6653      | 793.3363         | 1584.6813      | 792.8443         | A    | 1242.6589 | 621.8331        | 1225.6324      | 613.3198         | 1224.6484      | 612.8278         | 12 |
| 17 | 1715.7759 | 858.3916        | 1698.7493      | 849.8783         | 1697.7653      | 849.3863         | L    | 1171.6218 | 586.3146        | 1154.5953      | 577.8013         | 1153.6113      | 577.3093         | 11 |
| 18 | 1786.8130 | 893.9101        | 1769.7865      | 885.3969         | 1768.8024      | 884.9049         | A    | 1058.5378 | 529.7725        | 1041.5112      | 521.2592         | 1040.5272      | 520.7672         | 10 |
| 19 | 1899.8971 | 950.4522        | 1882.8705      | 941.9389         | 1881.8865      | 941.4469         | L    | 987.5007  | 494.2540        | 970.4741       | 485.7407         | 969.4901       | 485.2487         | 9  |
| 20 | 1996.9498 | 998.9786        | 1979.9233      | 990.4653         | 1978.9393      | 989.9733         | P    | 874.4166  | 437.7119        | 857.3900       | 429.1987         | 856.4060       | 428.7067         | 8  |
| 21 | 2067.9869 | 1034.4971       | 2050.9604      | 1025.9838        | 2049.9764      | 1025.4918        | A    | 777.3638  | 389.1856        | 760.3373       | 380.6723         | 759.3533       | 380.1803         | 7  |
| 22 | 2205.0459 | 1103.0266       | 2188.0193      | 1094.5133        | 2187.0353      | 1094.0213        | H    | 706.3267  | 353.6670        | 689.3002       | 345.1537         | 688.3161       | 344.6617         | 6  |
| 23 | 2292.0779 | 1146.5426       | 2275.0513      | 1138.0293        | 2274.0673      | 1137.5373        | S    | 569.2678  | 285.1375        | 552.2413       | 276.6243         | 551.2572       | 276.1323         | 5  |

|    |           |           |           |           |           |           |   |          |          |          |          |          |          |   |
|----|-----------|-----------|-----------|-----------|-----------|-----------|---|----------|----------|----------|----------|----------|----------|---|
| 24 | 2455.1412 | 1228.0742 | 2438.1147 | 1219.5610 | 2437.1306 | 1219.0690 | Y | 482.2358 | 241.6215 | 465.2092 | 233.1083 | 464.2252 | 232.6162 | 4 |
| 25 | 2542.1732 | 1271.5903 | 2525.1467 | 1263.0770 | 2524.1627 | 1262.5850 | S | 319.1724 | 160.0899 | 302.1459 | 151.5766 | 301.1619 | 151.0846 | 3 |
| 26 | 2599.1947 | 1300.1010 | 2582.1682 | 1291.5877 | 2581.1841 | 1291.0957 | G | 232.1404 | 116.5738 | 215.1139 | 108.0606 |          |          | 2 |
| 27 |           |           |           |           |           |           | R | 175.1190 | 88.0631  | 158.0924 | 79.5498  |          |          | 1 |

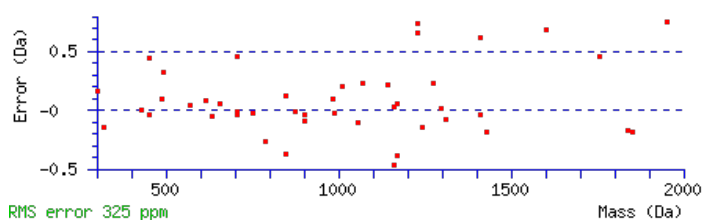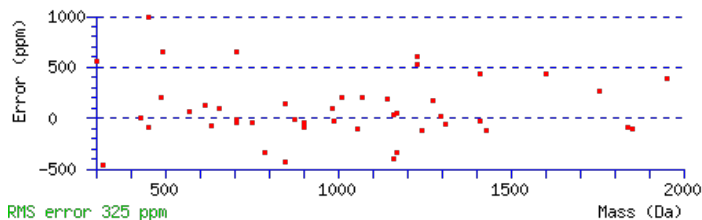

NCBI BLAST search of [NISDGFEDGIPDNVDAALALPAHSYSGR](#)  
 (Parameters: blastp, nr protein database, expect=20000, no filter, PAM30)  
 Other BLAST [web gateways](#)

All matches to this query

| Score | Mr(calc)  | Delta   | Sequence                                     | Site Analysis         |
|-------|-----------|---------|----------------------------------------------|-----------------------|
| 47.4  | 2772.2991 | -0.0030 | <a href="#">NISDGFEDGIPDNVDAALALPAHSYSGR</a> | Deamidated N1 66.25%  |
| 44.5  | 2772.2991 | -0.0030 | <a href="#">NISDGFEDGIPDNVDAALALPAHSYSGR</a> | Deamidated N12 33.75% |
| 4.4   | 2770.3005 | 1.9956  | <a href="#">NEAALLQSTLEQNHKSEENKSNER</a>     |                       |
| 4.4   | 2770.3005 | 1.9956  | <a href="#">NEAALLQSTLEQNHKSEENKSNER</a>     |                       |
| 4.4   | 2770.3005 | 1.9956  | <a href="#">NEAALLQSTLEQNHKSEENKSNER</a>     |                       |
| 4.4   | 2770.3005 | 1.9956  | <a href="#">NEAALLQSTLEQNHKSEENKSNER</a>     |                       |
| 4.4   | 2771.2845 | 1.0116  | <a href="#">NEAALLQSTLEQNHKSEENKSNER</a>     |                       |
| 4.3   | 2772.2881 | 0.0080  | <a href="#">AGIMTSTNRMPPAPPKQIDLGNSM</a>     |                       |
| 4.3   | 2772.2881 | 0.0080  | <a href="#">MSNNGLDIQKPPAPPMRNTSTMIGA</a>    |                       |
| 4.3   | 2772.2881 | 0.0080  | <a href="#">MSNNGLDIQKPPAPPMRNTSTMIGA</a>    |                       |

Mascot: <http://www.matrixscience.com/>

# MASCOT SCIENCE Mascot Search Results

## Peptide View

MS/MS Fragmentation of **FEVDSPVYNATWSASLK**

Found in **P04114** in **con\_Xuniprot\_HUMAN3**, APOB\_HUMAN Apolipoprotein B-100 OS=Homo sapiens GN=APOB PE=1 SV=2

Match to Query 11534: 1913.91148 from(957.962850,2+) intensity(57838.4414) rtinseconds(1911) scans(4792) index(8470)

Title: 111019\_Est\_ISCardio\_NMI\_YS\_G\_3Spectrum4134\_scans\_\_4792

Data file C:\\mascot\\20140703\_Tmgf\_1D\\CSV\_UseAnalysis\\MasterCSV\\All\_Glyco\\mgf\\ptm\\UC18ERLIC\_PTM\_35D.mgf

Click mouse within plot area to zoom in by factor of two about that point

Or, to Da

Label all possible matches Label matches used for scoring

Show Y-axis

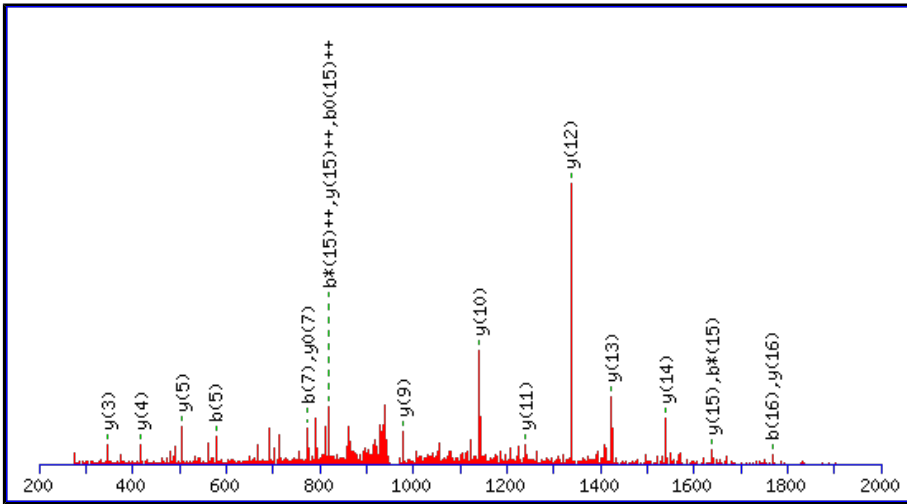

Monoisotopic mass of neutral peptide Mr(calc): 1913.9047

Fixed modifications: Carbamidomethyl (C) (apply to specified residues or termini only)

Variable modifications:

N9 : Deamidated (NQ)

Ions Score: 102 Expect: 1.3e-008

Matches : 19/170 fragment ions using 17 most intense peaks ([help](#))

| #  | b         | b <sup>++</sup> | b <sup>*</sup> | b <sup>*++</sup> | b <sup>0</sup> | b <sup>0++</sup> | Seq. | y         | y <sup>++</sup> | y <sup>*</sup> | y <sup>*++</sup> | y <sup>0</sup> | y <sup>0++</sup> | #  |
|----|-----------|-----------------|----------------|------------------|----------------|------------------|------|-----------|-----------------|----------------|------------------|----------------|------------------|----|
| 1  | 148.0757  | 74.5415         |                |                  |                |                  | F    |           |                 |                |                  |                |                  | 17 |
| 2  | 277.1183  | 139.0628        |                |                  | 259.1077       | 130.0575         | E    | 1767.8436 | 884.4254        | 1750.8170      | 875.9121         | 1749.8330      | 875.4201         | 16 |
| 3  | 376.1867  | 188.5970        |                |                  | 358.1761       | 179.5917         | V    | 1638.8010 | 819.9041        | 1621.7744      | 811.3909         | 1620.7904      | 810.8988         | 15 |
| 4  | 491.2136  | 246.1105        |                |                  | 473.2031       | 237.1052         | D    | 1539.7326 | 770.3699        | 1522.7060      | 761.8566         | 1521.7220      | 761.3646         | 14 |
| 5  | 578.2457  | 289.6265        |                |                  | 560.2351       | 280.6212         | S    | 1424.7056 | 712.8564        | 1407.6791      | 704.3432         | 1406.6951      | 703.8512         | 13 |
| 6  | 675.2984  | 338.1529        |                |                  | 657.2879       | 329.1476         | P    | 1337.6736 | 669.3404        | 1320.6470      | 660.8272         | 1319.6630      | 660.3352         | 12 |
| 7  | 774.3668  | 387.6871        |                |                  | 756.3563       | 378.6818         | V    | 1240.6208 | 620.8141        | 1223.5943      | 612.3008         | 1222.6103      | 611.8088         | 11 |
| 8  | 937.4302  | 469.2187        |                |                  | 919.4196       | 460.2134         | Y    | 1141.5524 | 571.2798        | 1124.5259      | 562.7666         | 1123.5419      | 562.2746         | 10 |
| 9  | 1052.4571 | 526.7322        | 1035.4306      | 518.2189         | 1034.4466      | 517.7269         | N    | 978.4891  | 489.7482        | 961.4625       | 481.2349         | 960.4785       | 480.7429         | 9  |
| 10 | 1123.4942 | 562.2508        | 1106.4677      | 553.7375         | 1105.4837      | 553.2455         | A    | 863.4621  | 432.2347        | 846.4356       | 423.7214         | 845.4516       | 423.2294         | 8  |
| 11 | 1224.5419 | 612.7746        | 1207.5154      | 604.2613         | 1206.5313      | 603.7693         | T    | 792.4250  | 396.7162        | 775.3985       | 388.2029         | 774.4145       | 387.7109         | 7  |
| 12 | 1410.6212 | 705.8143        | 1393.5947      | 697.3010         | 1392.6107      | 696.8090         | W    | 691.3774  | 346.1923        | 674.3508       | 337.6790         | 673.3668       | 337.1870         | 6  |
| 13 | 1497.6533 | 749.3303        | 1480.6267      | 740.8170         | 1479.6427      | 740.3250         | S    | 505.2980  | 253.1527        | 488.2715       | 244.6394         | 487.2875       | 244.1474         | 5  |
| 14 | 1568.6904 | 784.8488        | 1551.6638      | 776.3355         | 1550.6798      | 775.8435         | A    | 418.2660  | 209.6366        | 401.2395       | 201.1234         | 400.2554       | 200.6314         | 4  |
| 15 | 1655.7224 | 828.3648        | 1638.6958      | 819.8516         | 1637.7118      | 819.3596         | S    | 347.2289  | 174.1181        | 330.2023       | 165.6048         | 329.2183       | 165.1128         | 3  |
| 16 | 1768.8065 | 884.9069        | 1751.7799      | 876.3936         | 1750.7959      | 875.9016         | L    | 260.1969  | 130.6021        | 243.1703       | 122.0888         |                |                  | 2  |
| 17 |           |                 |                |                  |                |                  | K    | 147.1128  | 74.0600         | 130.0863       | 65.5468          |                |                  | 1  |

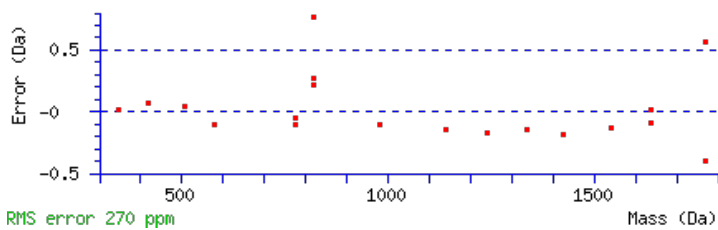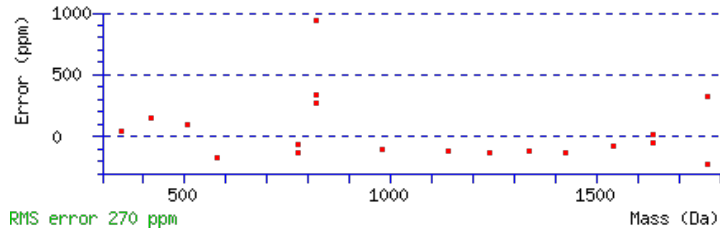

NCBI **BLAST** search of [FEVDSPVYNATWSASLK](#)

(Parameters: blastp, nr protein database, expect=20000, no filter, PAM30)

Other BLAST [web gateways](#)

**All matches to this query**

| Score | Mr(calc)  | Delta   | Sequence                           |
|-------|-----------|---------|------------------------------------|
| 102.5 | 1913.9047 | 0.0065  | <a href="#">FEVDSPVYNATWSASLK</a>  |
| 8.3   | 1913.9022 | 0.0090  | <a href="#">IVMDFLGFNWNWINK</a>    |
| 8.1   | 1912.9023 | 1.0089  | <a href="#">CEECGKALIQESTLTR</a>   |
| 6.5   | 1913.9087 | 0.0024  | <a href="#">GSPNAVMEHRQMTSPKK</a>  |
| 6.2   | 1913.9153 | -0.0041 | <a href="#">NQISNAAVHMAVATEQTK</a> |
| 6.2   | 1913.9153 | -0.0041 | <a href="#">NQISNAAVHMAVATEQTK</a> |
| 6.2   | 1913.9153 | -0.0041 | <a href="#">NQISNAAVHMAVATEQTK</a> |
| 6.1   | 1913.9022 | 0.0090  | <a href="#">IVMDFLGFNWNWINK</a>    |
| 5.8   | 1912.9023 | 1.0089  | <a href="#">MNECTHLIVQEPKGQK</a>   |
| 5.8   | 1913.9087 | 0.0024  | <a href="#">GSPNAVMEHRQMTSPKK</a>  |

Mascot: <http://www.matrixscience.com/>

# MATRIX SCIENCE Mascot Search Results

## Peptide View

MS/MS Fragmentation of **QVFPGLNYCTSGAYSNASSTDSASYPLTGDTR**

Found in **P04114** in **con\_Xuniprot\_HUMAN3**, APOB\_HUMAN Apolipoprotein B-100 OS=Homo sapiens GN=APOB PE=1 SV=2

Match to Query 27814: 3550.558392 from(1184.526740,3+) intensity(166897.3750) rtinseconds(1957) scans(5190) index(24072)

Title: 111019\_Est\_MI\_YS\_G\_05Spectrum4484\_scans\_5190

Data file C:\mascot\20140703\_Tmgf\_1D\CSV\_UseAnalysis\MasterCSV\All\_Glyco\mgf\ptm\UC18ERLIC\_PTM\_35D.mgf

Click mouse within plot area to zoom in by factor of two about that point

Or, to Da

Label all possible matches Label matches used for scoring

Show Y-axis

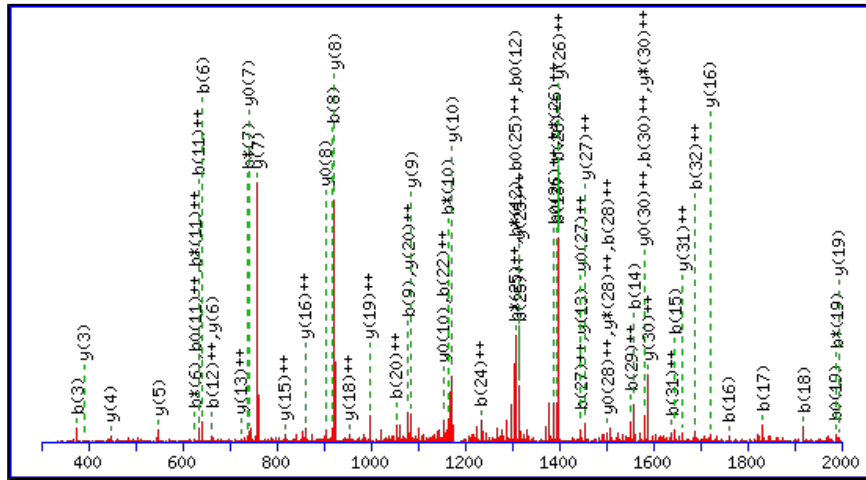

Monoisotopic mass of neutral peptide Mr(calc): 3550.5471

Fixed modifications: Carbamidomethyl (C) (apply to specified residues or termini only)

Variable modifications:

N16 : Deamidated (NQ)

Ions Score: 78 Expect: 1.2e-006

Matches : 66/364 fragment ions using 102 most intense peaks ([help](#))

| #  | b                | b <sup>++</sup>  | b <sup>*</sup>   | b <sup>*++</sup> | b <sup>0</sup>   | b <sup>0++</sup> | Seq. | y                | y <sup>++</sup>  | y <sup>*</sup> | y <sup>*++</sup> | y <sup>0</sup> | y <sup>0++</sup> | #  |
|----|------------------|------------------|------------------|------------------|------------------|------------------|------|------------------|------------------|----------------|------------------|----------------|------------------|----|
| 1  | 129.0659         | 65.0366          | 112.0393         | 56.5233          |                  |                  | Q    |                  |                  |                |                  |                |                  | 33 |
| 2  | 228.1343         | 114.5708         | 211.1077         | 106.0575         |                  |                  | V    | 3423.4958        | 1712.2515        | 3406.4692      | 1703.7383        | 3405.4852      | 1703.2462        | 32 |
| 3  | <b>375.2027</b>  | 188.1050         | 358.1761         | 179.5917         |                  |                  | F    | 3324.4274        | <b>1662.7173</b> | 3307.4008      | 1654.2040        | 3306.4168      | 1653.7120        | 31 |
| 4  | 472.2554         | 236.6314         | 455.2289         | 228.1181         |                  |                  | P    | 3177.3589        | <b>1589.1831</b> | 3160.3324      | <b>1580.6698</b> | 3159.3484      | <b>1580.1778</b> | 30 |
| 5  | 529.2769         | 265.1421         | 512.2504         | 256.6288         |                  |                  | G    | 3080.3062        | 1540.6567        | 3063.2796      | 1532.1435        | 3062.2956      | 1531.6514        | 29 |
| 6  | <b>642.3610</b>  | 321.6841         | <b>625.3344</b>  | 313.1709         |                  |                  | L    | 3023.2847        | 1512.1460        | 3006.2582      | <b>1503.6327</b> | 3005.2742      | <b>1503.1407</b> | 28 |
| 7  | 756.4039         | 378.7056         | <b>739.3774</b>  | 370.1923         |                  |                  | N    | 2910.2007        | <b>1455.6040</b> | 2893.1741      | 1447.0907        | 2892.1901      | <b>1446.5987</b> | 27 |
| 8  | <b>919.4672</b>  | 460.2373         | 902.4407         | 451.7240         |                  |                  | Y    | 2796.1577        | <b>1398.5825</b> | 2779.1312      | 1390.0692        | 2778.1472      | 1389.5772        | 26 |
| 9  | <b>1079.4979</b> | 540.2526         | 1062.4713        | 531.7393         |                  |                  | C    | 2633.0944        | <b>1317.0508</b> | 2616.0678      | 1308.5376        | 2615.0838      | 1308.0456        | 25 |
| 10 | 1180.5456        | 590.7764         | <b>1163.5190</b> | 582.2631         | 1162.5350        | 581.7711         | T    | 2473.0637        | 1237.0355        | 2456.0372      | 1228.5222        | 2455.0532      | 1228.0302        | 24 |
| 11 | 1267.5776        | <b>634.2924</b>  | 1250.5510        | <b>625.7792</b>  | 1249.5670        | <b>625.2871</b>  | S    | 2372.0161        | 1186.5117        | 2354.9895      | 1177.9984        | 2354.0055      | 1177.5064        | 23 |
| 12 | 1324.5991        | <b>662.8032</b>  | <b>1307.5725</b> | 654.2899         | <b>1306.5885</b> | 653.7979         | G    | 2284.9840        | 1142.9957        | 2267.9575      | 1134.4824        | 2266.9735      | 1133.9904        | 22 |
| 13 | <b>1395.6362</b> | 698.3217         | 1378.6096        | 689.8084         | 1377.6256        | 689.3164         | A    | 2227.9626        | 1114.4849        | 2210.9360      | 1105.9717        | 2209.9520      | 1105.4796        | 21 |
| 14 | <b>1558.6995</b> | 779.8534         | 1541.6729        | 771.3401         | 1540.6889        | 770.8481         | Y    | 2156.9255        | <b>1078.9664</b> | 2139.8989      | 1070.4531        | 2138.9149      | 1069.9611        | 20 |
| 15 | <b>1645.7315</b> | 823.3694         | 1628.7050        | 814.8561         | 1627.7210        | 814.3641         | S    | <b>1993.8621</b> | <b>997.4347</b>  | 1976.8356      | 988.9214         | 1975.8516      | 988.4294         | 19 |
| 16 | <b>1760.7585</b> | 880.8829         | 1743.7319        | 872.3696         | 1742.7479        | 871.8776         | N    | 1906.8301        | <b>953.9187</b>  | 1889.8036      | 945.4054         | 1888.8195      | 944.9134         | 18 |
| 17 | <b>1831.7956</b> | 916.4014         | 1814.7690        | 907.8882         | 1813.7850        | 907.3961         | A    | 1791.8032        | 896.4052         | 1774.7766      | 887.8919         | 1773.7926      | 887.3999         | 17 |
| 18 | <b>1918.8276</b> | 959.9174         | 1901.8011        | 951.4042         | 1900.8170        | 950.9122         | S    | <b>1720.7661</b> | <b>860.8867</b>  | 1703.7395      | 852.3734         | 1702.7555      | 851.8814         | 16 |
| 19 | 2005.8596        | 1003.4335        | <b>1988.8331</b> | 994.9202         | <b>1987.8491</b> | 994.4282         | S    | 1633.7340        | <b>817.3706</b>  | 1616.7075      | 808.8574         | 1615.7235      | 808.3654         | 15 |
| 20 | 2106.9073        | <b>1053.9573</b> | 2089.8808        | 1045.4440        | 2088.8967        | 1044.9520        | T    | 1546.7020        | 773.8546         | 1529.6754      | 765.3414         | 1528.6914      | 764.8494         | 14 |
| 21 | 2221.9343        | 1111.4708        | 2204.9077        | 1102.9575        | 2203.9237        | 1102.4655        | D    | <b>1445.6543</b> | <b>723.3308</b>  | 1428.6278      | 714.8175         | 1427.6438      | 714.3255         | 13 |
| 22 | 2308.9663        | <b>1154.9868</b> | 2291.9397        | 1146.4735        | 2290.9557        | 1145.9815        | S    | 1330.6274        | 665.8173         | 1313.6008      | 657.3041         | 1312.6168      | 656.8120         | 12 |
| 23 | 2380.0034        | 1190.5053        | 2362.9768        | 1181.9921        | 2361.9928        | 1181.5001        | A    | 1243.5953        | 622.3013         | 1226.5688      | 613.7880         | 1225.5848      | 613.2960         | 11 |

|    |           |                  |           |                  |           |                  |   |                  |          |           |          |                  |          |    |
|----|-----------|------------------|-----------|------------------|-----------|------------------|---|------------------|----------|-----------|----------|------------------|----------|----|
| 24 | 2467.0354 | <b>1234.0214</b> | 2450.0089 | 1225.5081        | 2449.0249 | 1225.0161        | S | <b>1172.5582</b> | 586.7828 | 1155.5317 | 578.2695 | <b>1154.5477</b> | 577.7775 | 10 |
| 25 | 2630.0988 | <b>1315.5530</b> | 2613.0722 | <b>1307.0397</b> | 2612.0882 | <b>1306.5477</b> | Y | <b>1085.5262</b> | 543.2667 | 1068.4997 | 534.7535 | 1067.5156        | 534.2615 | 9  |
| 26 | 2793.1621 | <b>1397.0847</b> | 2776.1355 | <b>1388.5714</b> | 2775.1515 | <b>1388.0794</b> | Y | <b>922.4629</b>  | 461.7351 | 905.4363  | 453.2218 | <b>904.4523</b>  | 452.7298 | 8  |
| 27 | 2890.2148 | <b>1445.6111</b> | 2873.1883 | 1437.0978        | 2872.2043 | 1436.6058        | P | <b>759.3995</b>  | 380.2034 | 742.3730  | 371.6901 | <b>741.3890</b>  | 371.1981 | 7  |
| 28 | 3003.2989 | <b>1502.1531</b> | 2986.2724 | 1493.6398        | 2985.2883 | 1493.1478        | L | <b>662.3468</b>  | 331.6770 | 645.3202  | 323.1638 | 644.3362         | 322.6717 | 6  |
| 29 | 3104.3466 | <b>1552.6769</b> | 3087.3200 | 1544.1637        | 3086.3360 | 1543.6717        | T | <b>549.2627</b>  | 275.1350 | 532.2362  | 266.6217 | 531.2522         | 266.1297 | 5  |
| 30 | 3161.3681 | <b>1581.1877</b> | 3144.3415 | 1572.6744        | 3143.3575 | 1572.1824        | G | <b>448.2150</b>  | 224.6112 | 431.1885  | 216.0979 | 430.2045         | 215.6059 | 4  |
| 31 | 3276.3950 | <b>1638.7011</b> | 3259.3684 | 1630.1879        | 3258.3844 | 1629.6959        | D | <b>391.1936</b>  | 196.1004 | 374.1670  | 187.5872 | 373.1830         | 187.0951 | 3  |
| 32 | 3377.4427 | <b>1689.2250</b> | 3360.4161 | 1680.7117        | 3359.4321 | 1680.2197        | T | 276.1666         | 138.5870 | 259.1401  | 130.0737 | 258.1561         | 129.5817 | 2  |
| 33 |           |                  |           |                  |           |                  | R | 175.1190         | 88.0631  | 158.0924  | 79.5498  |                  |          | 1  |

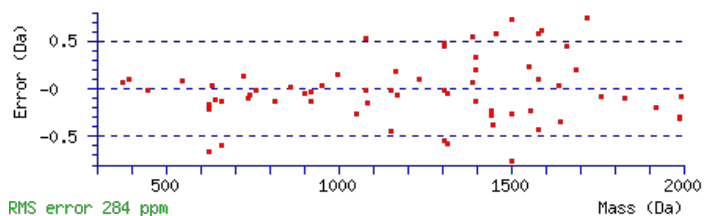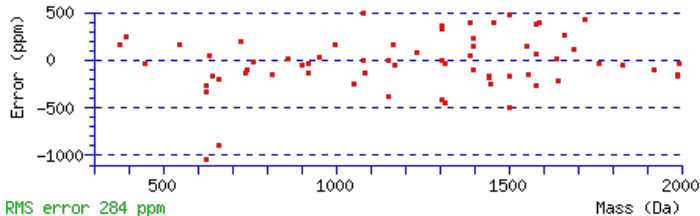

NCBI BLAST search of [QVFPGLNYCTSGAYSNASSTDSASYPLTGDTR](#)

(Parameters: blastp, nr protein database, expect=20000, no filter, PAM30)

Other BLAST [web gateways](#)

All matches to this query

| Score | Mr(calc)  | Delta   | Sequence                                         | Site Analysis         |
|-------|-----------|---------|--------------------------------------------------|-----------------------|
| 78.4  | 3550.5471 | 0.0113  | <a href="#">QVFPGLNYCTSGAYSNASSTDSASYPLTGDTR</a> | Deamidated N16 49.67% |
| 78.3  | 3550.5471 | 0.0113  | <a href="#">QVFPGLNYCTSGAYSNASSTDSASYPLTGDTR</a> | Deamidated N7 48.43%  |
| 64.3  | 3550.5471 | 0.0113  | <a href="#">QVFPGLNYCTSGAYSNASSTDSASYPLTGDTR</a> | Deamidated Q1 1.90%   |
| 56.5  | 3549.5631 | 0.9953  | <a href="#">QVFPGLNYCTSGAYSNASSTDSASYPLTGDTR</a> |                       |
| 7.0   | 3550.5408 | 0.0176  | <a href="#">QEPQLCGMGTEQGCWIPVSSDKGSCPOVMER</a>  |                       |
| 3.7   | 3548.5640 | 1.9944  | <a href="#">CLPLSCTVESAPQAEDCPVGTDNTCLVNRR</a>   |                       |
| 2.2   | 3549.5480 | 1.0104  | <a href="#">CLPLSCTVESAPQAEDCPVGTDNTCLVNRR</a>   |                       |
| 1.6   | 3550.5690 | -0.0106 | <a href="#">ESGYMQNDAHEFLSQCLDQKEDMEKLNK</a>     |                       |
| 1.5   | 3548.5520 | 2.0064  | <a href="#">MAEYEKQEETMEDIPNPMPEELHGTLNID</a>    |                       |
| 1.5   | 3548.5520 | 2.0064  | <a href="#">MAEYEKQEETMEDIPNPMPEELHGTLNIN</a>    |                       |

Mascot: <http://www.matrixscience.com/>

# MASCOT SCIENCE Mascot Search Results

## Peptide View

MS/MS Fragmentation of **VNQNLYYESGSLNFSK**

Found in **P04114** in **con\_Xuniprot\_HUMAN3**, APOB\_HUMAN Apolipoprotein B-100 OS=Homo sapiens GN=APOB PE=1 SV=2

Match to Query 10888: 1798.879088 from(900.446820,2+) intensity(38580.1797) rtinseconds(1411) scans(3219) index(11741)

Title: 111019\_Est\_ISCardio\_NMI\_YS\_G\_8Spectrum2746\_scans\_\_3219

Data file C:\\mascot\\20140703\_Tmgf\_1D\\CSV\_UseAnalysis\\MasterCSV\\All\_Glyco\\mgf\\ptm\\UC18ERLIC\_PTM\_35D.mgf

Click mouse within plot area to zoom in by factor of two about that point

Or, to Da

Label all possible matches Label matches used for scoring

Show Y-axis

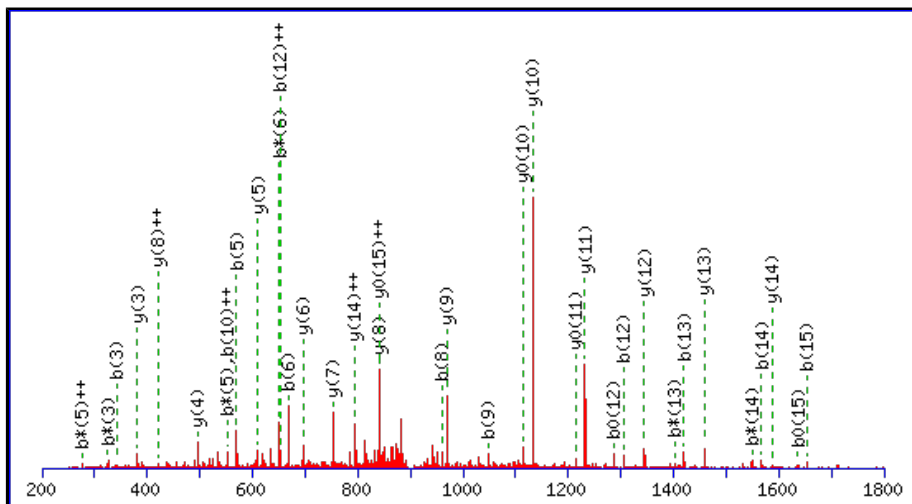

Monoisotopic mass of neutral peptide Mr(calc): 1798.8737

Fixed modifications: Carbamidomethyl (C) (apply to specified residues or termini only)

Variable modifications:

N13 : Deamidated (NQ)

Ions Score: 76 Expect: 5.1e-006

Matches : 36/162 fragment ions using 62 most intense peaks ([help](#))

| #  | b         | b <sup>++</sup> | b <sup>*</sup> | b <sup>*++</sup> | b <sup>0</sup> | b <sup>0++</sup> | Seq. | y         | y <sup>++</sup> | y <sup>*</sup> | y <sup>*++</sup> | y <sup>0</sup> | y <sup>0++</sup> | #  |
|----|-----------|-----------------|----------------|------------------|----------------|------------------|------|-----------|-----------------|----------------|------------------|----------------|------------------|----|
| 1  | 100.0757  | 50.5415         |                |                  |                |                  | V    |           |                 |                |                  |                |                  | 16 |
| 2  | 214.1186  | 107.5629        | 197.0921       | 99.0497          |                |                  | N    | 1700.8126 | 850.9099        | 1683.7861      | 842.3967         | 1682.8020      | 841.9047         | 15 |
| 3  | 342.1772  | 171.5922        | 325.1506       | 163.0790         |                |                  | Q    | 1586.7697 | 793.8885        | 1569.7431      | 785.3752         | 1568.7591      | 784.8832         | 14 |
| 4  | 456.2201  | 228.6137        | 439.1936       | 220.1004         |                |                  | N    | 1458.7111 | 729.8592        | 1441.6846      | 721.3459         | 1440.7005      | 720.8539         | 13 |
| 5  | 569.3042  | 285.1557        | 552.2776       | 276.6425         |                |                  | L    | 1344.6682 | 672.8377        | 1327.6416      | 664.3245         | 1326.6576      | 663.8324         | 12 |
| 6  | 668.3726  | 334.6899        | 651.3461       | 326.1767         |                |                  | V    | 1231.5841 | 616.2957        | 1214.5576      | 607.7824         | 1213.5735      | 607.2904         | 11 |
| 7  | 831.4359  | 416.2216        | 814.4094       | 407.7083         |                |                  | Y    | 1132.5157 | 566.7615        | 1115.4891      | 558.2482         | 1114.5051      | 557.7562         | 10 |
| 8  | 960.4785  | 480.7429        | 943.4520       | 472.2296         | 942.4680       | 471.7376         | E    | 969.4524  | 485.2298        | 952.4258       | 476.7165         | 951.4418       | 476.2245         | 9  |
| 9  | 1047.5106 | 524.2589        | 1030.4840      | 515.7456         | 1029.5000      | 515.2536         | S    | 840.4098  | 420.7085        | 823.3832       | 412.1953         | 822.3992       | 411.7032         | 8  |
| 10 | 1104.5320 | 552.7696        | 1087.5055      | 544.2564         | 1086.5214      | 543.7644         | G    | 753.3777  | 377.1925        | 736.3512       | 368.6792         | 735.3672       | 368.1872         | 7  |
| 11 | 1191.5640 | 596.2857        | 1174.5375      | 587.7724         | 1173.5535      | 587.2804         | S    | 696.3563  | 348.6818        | 679.3297       | 340.1685         | 678.3457       | 339.6765         | 6  |
| 12 | 1304.6481 | 652.8277        | 1287.6216      | 644.3144         | 1286.6375      | 643.8224         | L    | 609.3243  | 305.1658        | 592.2977       | 296.6525         | 591.3137       | 296.1605         | 5  |
| 13 | 1419.6750 | 710.3412        | 1402.6485      | 701.8279         | 1401.6645      | 701.3359         | N    | 496.2402  | 248.6237        | 479.2136       | 240.1105         | 478.2296       | 239.6185         | 4  |
| 14 | 1566.7435 | 783.8754        | 1549.7169      | 775.3621         | 1548.7329      | 774.8701         | F    | 381.2132  | 191.1103        | 364.1867       | 182.5970         | 363.2027       | 182.1050         | 3  |
| 15 | 1653.7755 | 827.3914        | 1636.7489      | 818.8781         | 1635.7649      | 818.3861         | S    | 234.1448  | 117.5761        | 217.1183       | 109.0628         | 216.1343       | 108.5708         | 2  |
| 16 |           |                 |                |                  |                |                  | K    | 147.1128  | 74.0600         | 130.0863       | 65.5468          |                |                  | 1  |



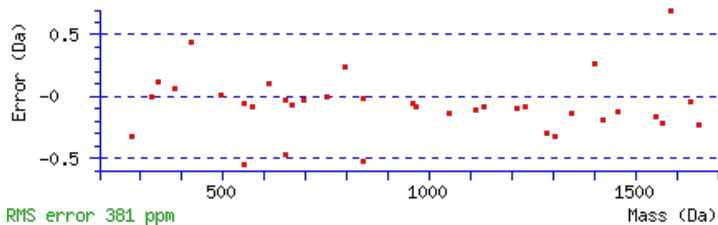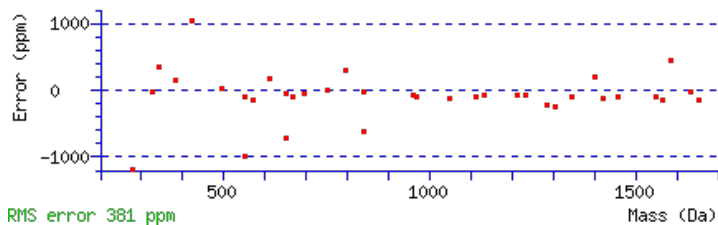

NCBI BLAST search of [VNQNLVYESGSLNFSK](#)

(Parameters: blastp, nr protein database, expect=20000, no filter, PAM30)

Other BLAST [web gateways](#)

**All matches to this query**

| Score | Mr(calc)  | Delta  | Sequence                          | Site Analysis          |
|-------|-----------|--------|-----------------------------------|------------------------|
| 76.5  | 1798.8737 | 0.0054 | <a href="#">VNQNLVYESGSLNFSK</a>  | Deamidated N13 100.00% |
| 8.7   | 1798.8737 | 0.0054 | <a href="#">VNQNLVYESGSLNFSK</a>  | Deamidated N4 0.00%    |
| 6.6   | 1798.8737 | 0.0054 | <a href="#">VNQNLVYESGSLNFSK</a>  | Deamidated Q3 0.00%    |
| 6.5   | 1798.8737 | 0.0054 | <a href="#">VNQNLVYESGSLNFSK</a>  | Deamidated N2 0.00%    |
| 5.6   | 1796.8765 | 2.0026 | <a href="#">SGENAANIASELARHTR</a> |                        |
| 5.3   | 1796.8765 | 2.0026 | <a href="#">SGENAANIASELARHTR</a> |                        |
| 1.9   | 1798.8737 | 0.0054 | <a href="#">LVEHNLSSITHYQQK</a>   |                        |
| 1.9   | 1798.8737 | 0.0054 | <a href="#">YYKIANNPTTDKENK</a>   |                        |
| 1.1   | 1797.8758 | 1.0033 | <a href="#">GRLGERLENYDDPHK</a>   |                        |

Mascot: <http://www.matrixscience.com/>

# MATRIX SCIENCE Mascot Search Results

## Peptide View

MS/MS Fragmentation of **NNALDFVTKSYNETK**

Found in **P04114** in **con\_Xuniprot\_HUMAN3**, APOB\_HUMAN Apolipoprotein B-100 OS=Homo sapiens GN=APOB PE=1 SV=2

Match to Query 9362: 1743.835248 from(872.924900,2+) intensity(37395.5039) rtinseconds(1433) scans(3491) index(25304)

Title: 111019\_Est\_MI\_YS\_G\_07Spectrum2960\_scans\_\_3491

Data file C:\\mascot\\20140703\_Tmgf\_1D\\CSV\_UseAnalysis\\MasterCSV\\All\_Glyco\\mgf\\ptm\\UC18ERLIC\_PTM\_35D.mgf

Click mouse within plot area to zoom in by factor of two about that point

Or, to Da

Label all possible matches Label matches used for scoring

Show Y-axis

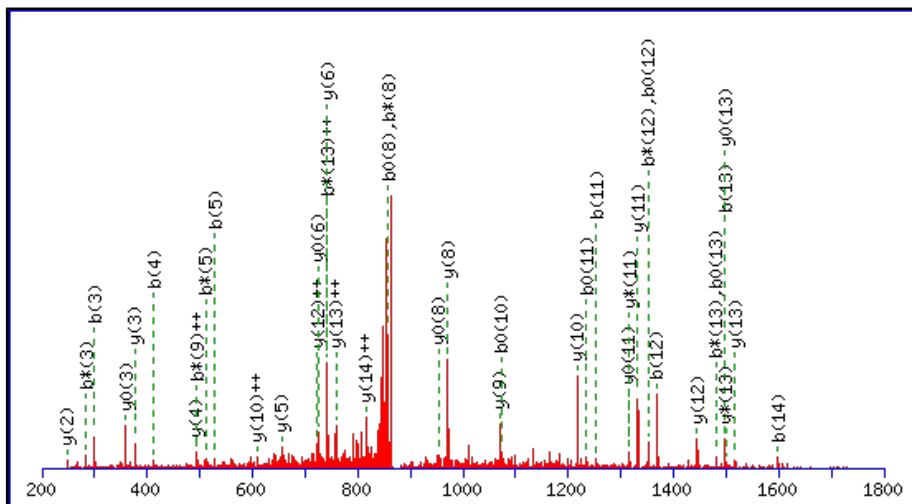

Monoisotopic mass of neutral peptide Mr(calc): 1743.8315

Fixed modifications: Carbamidomethyl (C) (apply to specified residues or termini only)

Variable modifications:

N12 : Deamidated (NQ)

Ions Score: 53 Expect: 0.00086

Matches : 41/158 fragment ions using 90 most intense peaks ([help](#))

| #  | b                | b <sup>++</sup> | b <sup>*</sup>   | b <sup>*++</sup> | b <sup>0</sup>   | b <sup>0++</sup> | Seq. | y                | y <sup>++</sup> | y <sup>*</sup>   | y <sup>*++</sup> | y <sup>0</sup>   | y <sup>0++</sup> | #  |
|----|------------------|-----------------|------------------|------------------|------------------|------------------|------|------------------|-----------------|------------------|------------------|------------------|------------------|----|
| 1  | 115.0502         | 58.0287         | 98.0237          | 49.5155          |                  |                  | N    |                  |                 |                  |                  |                  |                  | 15 |
| 2  | 229.0931         | 115.0502        | 212.0666         | 106.5369         |                  |                  | N    | 1630.7959        | 815.9016        | 1613.7693        | 807.3883         | 1612.7853        | 806.8963         | 14 |
| 3  | <b>300.1302</b>  | 150.5688        | <b>283.1037</b>  | 142.0555         |                  |                  | A    | <b>1516.7530</b> | <b>758.8801</b> | <b>1499.7264</b> | 750.3668         | <b>1498.7424</b> | 749.8748         | 13 |
| 4  | <b>413.2143</b>  | 207.1108        | 396.1878         | 198.5975         |                  |                  | L    | <b>1445.7159</b> | <b>723.3616</b> | 1428.6893        | 714.8483         | 1427.7053        | 714.3563         | 12 |
| 5  | <b>528.2413</b>  | 264.6243        | <b>511.2147</b>  | 256.1110         | 510.2307         | 255.6190         | D    | <b>1332.6318</b> | 666.8195        | <b>1315.6052</b> | 658.3063         | <b>1314.6212</b> | 657.8143         | 11 |
| 6  | 675.3097         | 338.1585        | 658.2831         | 329.6452         | 657.2991         | 329.1532         | F    | <b>1217.6048</b> | <b>609.3061</b> | 1200.5783        | 600.7928         | 1199.5943        | 600.3008         | 10 |
| 7  | 774.3781         | 387.6927        | 757.3515         | 379.1794         | 756.3675         | 378.6874         | V    | <b>1070.5364</b> | 535.7719        | 1053.5099        | 527.2586         | 1052.5259        | 526.7666         | 9  |
| 8  | 875.4258         | 438.2165        | <b>858.3992</b>  | 429.7032         | <b>857.4152</b>  | 429.2112         | T    | <b>971.4680</b>  | 486.2376        | 954.4415         | 477.7244         | <b>953.4575</b>  | 477.2324         | 8  |
| 9  | 1003.5207        | 502.2640        | 986.4942         | <b>493.7507</b>  | 985.5102         | 493.2587         | K    | 870.4203         | 435.7138        | 853.3938         | 427.2005         | 852.4098         | 426.7085         | 7  |
| 10 | 1090.5527        | 545.7800        | 1073.5262        | 537.2667         | <b>1072.5422</b> | 536.7747         | S    | <b>742.3254</b>  | 371.6663        | 725.2988         | 363.1531         | <b>724.3148</b>  | 362.6610         | 6  |
| 11 | <b>1253.6161</b> | 627.3117        | 1236.5895        | 618.7984         | <b>1235.6055</b> | 618.3064         | Y    | <b>655.2933</b>  | 328.1503        | 638.2668         | 319.6370         | 637.2828         | 319.1450         | 5  |
| 12 | <b>1368.6430</b> | 684.8251        | <b>1351.6165</b> | 676.3119         | <b>1350.6325</b> | 675.8199         | N    | <b>492.2300</b>  | 246.6186        | 475.2035         | 238.1054         | 474.2195         | 237.6134         | 4  |
| 13 | <b>1497.6856</b> | 749.3464        | <b>1480.6591</b> | <b>740.8332</b>  | <b>1479.6750</b> | 740.3412         | E    | <b>377.2031</b>  | 189.1052        | 360.1765         | 180.5919         | <b>359.1925</b>  | 180.0999         | 3  |
| 14 | <b>1598.7333</b> | 799.8703        | 1581.7067        | 791.3570         | 1580.7227        | 790.8650         | T    | <b>248.1605</b>  | 124.5839        | 231.1339         | 116.0706         | 230.1499         | 115.5786         | 2  |
| 15 |                  |                 |                  |                  |                  |                  | K    | 147.1128         | 74.0600         | 130.0863         | 65.5468          |                  |                  | 1  |

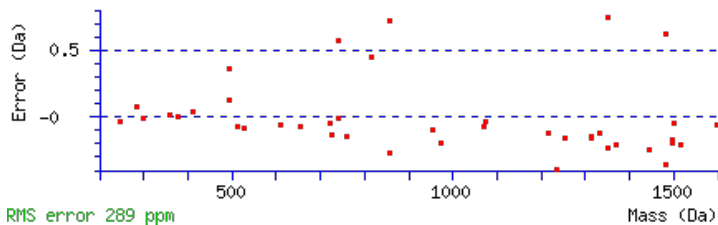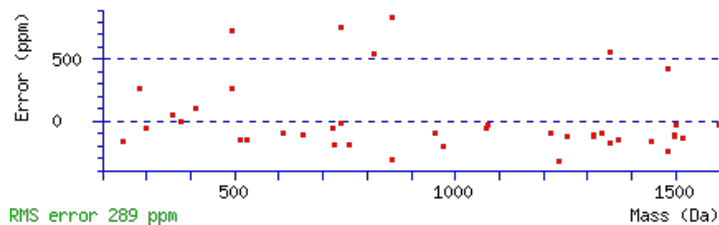

NCBI **BLAST** search of [NNALDFVTKSYNETK](#)

(Parameters: blastp, nr protein database, expect=20000, no filter, PAM30)

Other BLAST [web gateways](#)

**All matches to this query**

| Score | Mr(calc)  | Delta  | Sequence                          | Site Analysis         |
|-------|-----------|--------|-----------------------------------|-----------------------|
| 53.2  | 1743.8315 | 0.0037 | <a href="#">NNALDFVTKSYNETK</a>   | Deamidated N12 99.98% |
| 12.9  | 1743.8315 | 0.0037 | <a href="#">NNALDFVTKSYNETK</a>   | Deamidated N2 0.01%   |
| 12.3  | 1743.8315 | 0.0037 | <a href="#">NNALDFVTKSYNETK</a>   | Deamidated N1 0.01%   |
| 4.0   | 1743.8290 | 0.0063 | <a href="#">HKLIQLMWNDWNK</a>     |                       |
| 3.8   | 1743.8275 | 0.0077 | <a href="#">DQGPDKENSGAIEASVK</a> |                       |
| 2.5   | 1743.8315 | 0.0037 | <a href="#">HQEVQDELEFITEK</a>    |                       |
| 1.1   | 1743.8349 | 0.0003 | <a href="#">NSPVEGAPLSGQDMTLK</a> |                       |
| 0.6   | 1742.8369 | 0.9983 | <a href="#">DMELSHLRSRQODK</a>    |                       |
| 0.6   | 1742.8369 | 0.9983 | <a href="#">DMELSHLRSRQODK</a>    |                       |
| 0.6   | 1743.8289 | 0.0064 | <a href="#">QNGAGPLSGQPPNQDHK</a> |                       |

Mascot: <http://www.matrixscience.com/>

# MATRIX SCIENCE Mascot Search Results

## Peptide View

MS/MS Fragmentation of **QVFPGLNYCTSGAYSNASSTDSASYPLTGDR**

Found in **P04114** in **con\_Xuniprot\_HUMAN3**, APOB\_HUMAN Apolipoprotein B-100 OS=Homo sapiens GN=APOB PE=1 SV=2

Match to Query 27828: 3552.547272 from(1185.189700,3+) intensity(0.0000) rtinseconds(1947) scans(5163) index(24068)

Title: 111019\_Est\_MI\_YS\_G\_05Spectrum4462\_scans\_\_5163

Data file C:\mascot\20140703\_Tmgf\_1D\CSV\_UseAnalysis\MasterCSV\All\_Glyco\mgf\ptm\UC18ERLIC\_PTM\_35D.mgf

Click mouse within plot area to zoom in by factor of two about that point

Or,  to  Da

Label all possible matches  Label matches used for scoring

Show Y-axis

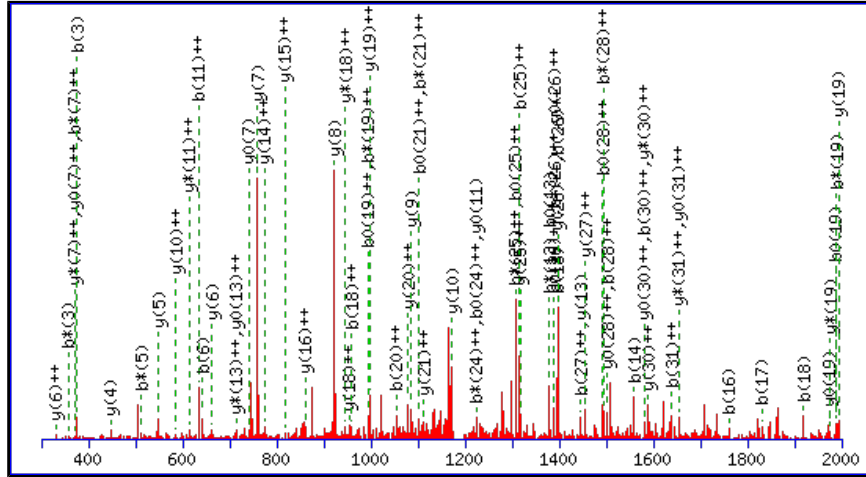

Monoisotopic mass of neutral peptide Mr(calc): 3550.5471

Fixed modifications: Carbamidomethyl (C) (apply to specified residues or termini only)

Variable modifications:

N7 : Deamidated (NQ)

Ions Score: 40 Expect: 0.0084

Matches : 73/364 fragment ions using 153 most intense peaks ([help](#))

| #  | b                | b <sup>++</sup>  | b <sup>*</sup>   | b <sup>*++</sup> | b <sup>0</sup>   | b <sup>0++</sup> | Seq.     | y                | y <sup>++</sup>  | y <sup>*</sup>   | y <sup>*++</sup> | y <sup>0</sup>   | y <sup>0++</sup> | #         |
|----|------------------|------------------|------------------|------------------|------------------|------------------|----------|------------------|------------------|------------------|------------------|------------------|------------------|-----------|
| 1  | 129.0659         | 65.0366          | 112.0393         | 56.5233          |                  |                  | <b>Q</b> |                  |                  |                  |                  |                  |                  | <b>33</b> |
| 2  | 228.1343         | 114.5708         | 211.1077         | 106.0575         |                  |                  | <b>V</b> | 3423.4958        | 1712.2515        | 3406.4692        | 1703.7383        | 3405.4852        | 1703.2462        | <b>32</b> |
| 3  | <b>375.2027</b>  | 188.1050         | <b>358.1761</b>  | 179.5917         |                  |                  | <b>F</b> | 3324.4274        | 1662.7173        | 3307.4008        | <b>1654.2040</b> | 3306.4168        | <b>1653.7120</b> | <b>31</b> |
| 4  | 472.2554         | 236.6314         | 455.2289         | 228.1181         |                  |                  | <b>P</b> | 3177.3589        | <b>1589.1831</b> | 3160.3324        | <b>1580.6698</b> | 3159.3484        | <b>1580.1778</b> | <b>30</b> |
| 5  | 529.2769         | 265.1421         | <b>512.2504</b>  | 256.6288         |                  |                  | <b>G</b> | 3080.3062        | 1540.6567        | 3063.2796        | 1532.1435        | 3062.2956        | 1531.6514        | <b>29</b> |
| 6  | <b>642.3610</b>  | 321.6841         | 625.3344         | 313.1709         |                  |                  | <b>L</b> | 3023.2847        | 1512.1460        | 3006.2582        | 1503.6327        | 3005.2742        | <b>1503.1407</b> | <b>28</b> |
| 7  | 757.3879         | 379.1976         | 740.3614         | <b>370.6843</b>  |                  |                  | <b>N</b> | 2910.2007        | <b>1455.6040</b> | 2893.1741        | 1447.0907        | 2892.1901        | 1446.5987        | <b>27</b> |
| 8  | 920.4512         | 460.7293         | 903.4247         | 452.2160         |                  |                  | <b>Y</b> | 2795.1737        | <b>1398.0905</b> | 2778.1472        | 1389.5772        | 2777.1631        | <b>1389.0852</b> | <b>26</b> |
| 9  | 1080.4819        | 540.7446         | 1063.4553        | 532.2313         |                  |                  | <b>C</b> | 2632.1104        | <b>1316.5588</b> | 2615.0838        | 1308.0456        | 2614.0998        | 1307.5535        | <b>25</b> |
| 10 | 1181.5296        | 591.2684         | 1164.5030        | 582.7552         | 1163.5190        | 582.2631         | <b>T</b> | 2472.0797        | 1236.5435        | 2455.0532        | 1228.0302        | 2454.0692        | 1227.5382        | <b>24</b> |
| 11 | 1268.5616        | <b>634.7844</b>  | 1251.5351        | 626.2712         | 1250.5510        | 625.7792         | <b>S</b> | 2371.0321        | 1186.0197        | 2354.0055        | 1177.5064        | 2353.0215        | 1177.0144        | <b>23</b> |
| 12 | 1325.5831        | 663.2952         | 1308.5565        | 654.7819         | 1307.5725        | 654.2899         | <b>G</b> | 2284.0000        | 1142.5037        | 2266.9735        | 1133.9904        | 2265.9895        | 1133.4984        | <b>22</b> |
| 13 | <b>1396.6202</b> | 698.8137         | <b>1379.5936</b> | 690.3005         | <b>1378.6096</b> | 689.8084         | <b>A</b> | 2226.9786        | <b>1113.9929</b> | 2209.9520        | 1105.4796        | 2208.9680        | 1104.9876        | <b>21</b> |
| 14 | <b>1559.6835</b> | 780.3454         | 1542.6570        | 771.8321         | 1541.6729        | 771.3401         | <b>Y</b> | 2155.9414        | <b>1078.4744</b> | 2138.9149        | 1069.9611        | 2137.9309        | 1069.4691        | <b>20</b> |
| 15 | 1646.7155        | 823.8614         | 1629.6890        | 815.3481         | 1628.7050        | 814.8561         | <b>S</b> | <b>1992.8781</b> | <b>996.9427</b>  | <b>1975.8516</b> | 988.4294         | <b>1974.8676</b> | 987.9374         | <b>19</b> |
| 16 | <b>1760.7585</b> | 880.8829         | 1743.7319        | 872.3696         | 1742.7479        | 871.8776         | <b>N</b> | 1905.8461        | <b>953.4267</b>  | 1888.8195        | <b>944.9134</b>  | 1887.8355        | 944.4214         | <b>18</b> |
| 17 | <b>1831.7956</b> | 916.4014         | 1814.7690        | 907.8882         | 1813.7850        | 907.3961         | <b>A</b> | 1791.8032        | 896.4052         | 1774.7766        | 887.8919         | 1773.7926        | 887.3999         | <b>17</b> |
| 18 | <b>1918.8276</b> | <b>959.9174</b>  | 1901.8011        | 951.4042         | 1900.8170        | 950.9122         | <b>S</b> | 1720.7661        | <b>860.8867</b>  | 1703.7395        | 852.3734         | 1702.7555        | 851.8814         | <b>16</b> |
| 19 | 2005.8596        | 1003.4335        | <b>1988.8331</b> | <b>994.9202</b>  | <b>1987.8491</b> | <b>994.4282</b>  | <b>S</b> | 1633.7340        | <b>817.3706</b>  | 1616.7075        | 808.8574         | 1615.7235        | 808.3654         | <b>15</b> |
| 20 | 2106.9073        | <b>1053.9573</b> | 2089.8808        | 1045.4440        | 2088.8967        | 1044.9520        | <b>T</b> | 1546.7020        | <b>773.8546</b>  | 1529.6754        | 765.3414         | 1528.6914        | 764.8494         | <b>14</b> |
| 21 | 2221.9343        | 1111.4708        | 2204.9077        | <b>1102.9575</b> | 2203.9237        | <b>1102.4655</b> | <b>D</b> | <b>1445.6543</b> | 723.3308         | 1428.6278        | <b>714.8175</b>  | 1427.6438        | <b>714.3255</b>  | <b>13</b> |
| 22 | 2308.9663        | 1154.9868        | 2291.9397        | 1146.4735        | 2290.9557        | 1145.9815        | <b>S</b> | 1330.6274        | 665.8173         | 1313.6008        | 657.3041         | 1312.6168        | 656.8120         | <b>12</b> |
| 23 | 2380.0034        | 1190.5053        | 2362.9768        | 1181.9921        | 2361.9928        | 1181.5001        | <b>A</b> | 1243.5953        | 622.3013         | 1226.5688        | <b>613.7880</b>  | <b>1225.5848</b> | 613.2960         | <b>11</b> |

|    |           |           |           |           |           |           |   |           |          |           |          |           |          |    |
|----|-----------|-----------|-----------|-----------|-----------|-----------|---|-----------|----------|-----------|----------|-----------|----------|----|
| 24 | 2467.0354 | 1234.0214 | 2450.0089 | 1225.5081 | 2449.0249 | 1225.0161 | S | 1172.5582 | 586.7828 | 1155.5317 | 578.2695 | 1154.5477 | 577.7775 | 10 |
| 25 | 2630.0988 | 1315.5530 | 2613.0722 | 1307.0397 | 2612.0882 | 1306.5477 | Y | 1085.5262 | 543.2667 | 1068.4997 | 534.7535 | 1067.5156 | 534.2615 | 9  |
| 26 | 2793.1621 | 1397.0847 | 2776.1355 | 1388.5714 | 2775.1515 | 1388.0794 | Y | 922.4629  | 461.7351 | 905.4363  | 453.2218 | 904.4523  | 452.7298 | 8  |
| 27 | 2890.2148 | 1445.6111 | 2873.1883 | 1437.0978 | 2872.2043 | 1436.6058 | P | 759.3995  | 380.2034 | 742.3730  | 371.6901 | 741.3890  | 371.1981 | 7  |
| 28 | 3003.2989 | 1502.1531 | 2986.2724 | 1493.6398 | 2985.2883 | 1493.1478 | L | 662.3468  | 331.6770 | 645.3202  | 323.1638 | 644.3362  | 322.6717 | 6  |
| 29 | 3104.3466 | 1552.6769 | 3087.3200 | 1544.1637 | 3086.3360 | 1543.6717 | T | 549.2627  | 275.1350 | 532.2362  | 266.6217 | 531.2522  | 266.1297 | 5  |
| 30 | 3161.3681 | 1581.1877 | 3144.3415 | 1572.6744 | 3143.3575 | 1572.1824 | G | 448.2150  | 224.6112 | 431.1885  | 216.0979 | 430.2045  | 215.6059 | 4  |
| 31 | 3276.3950 | 1638.7011 | 3259.3684 | 1630.1879 | 3258.3844 | 1629.6959 | D | 391.1936  | 196.1004 | 374.1670  | 187.5872 | 373.1830  | 187.0951 | 3  |
| 32 | 3377.4427 | 1689.2250 | 3360.4161 | 1680.7117 | 3359.4321 | 1680.2197 | T | 276.1666  | 138.5870 | 259.1401  | 130.0737 | 258.1561  | 129.5817 | 2  |
| 33 |           |           |           |           |           |           | R | 175.1190  | 88.0631  | 158.0924  | 79.5498  |           |          | 1  |

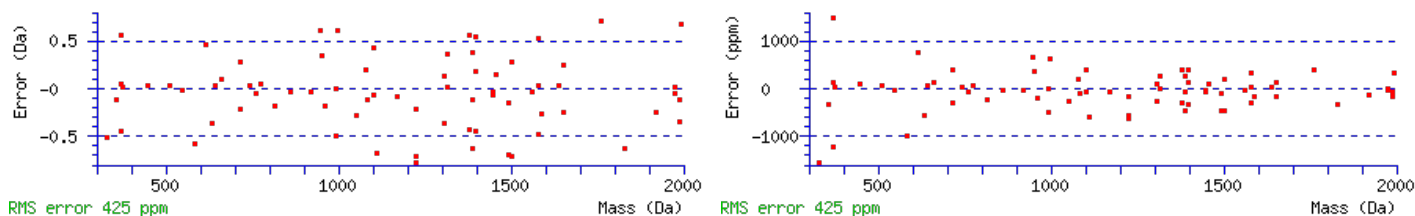

NCBI BLAST search of [QVFPGLNYCTSGAYSNASSTDSASYPLTGDTR](#)

(Parameters: blastp, nr protein database, expect=20000, no filter, PAM30)

Other BLAST [web gateways](#)

All matches to this query

| Score | Mr(calc)  | Delta  | Sequence                                         | Site Analysis         |
|-------|-----------|--------|--------------------------------------------------|-----------------------|
| 39.5  | 3550.5471 | 2.0002 | <a href="#">QVFPGLNYCTSGAYSNASSTDSASYPLTGDTR</a> | Deamidated N7 40.56%  |
| 38.6  | 3550.5471 | 2.0002 | <a href="#">QVFPGLNYCTSGAYSNASSTDSASYPLTGDTR</a> | Deamidated N16 33.12% |
| 37.6  | 3550.5471 | 2.0002 | <a href="#">QVFPGLNYCTSGAYSNASSTDSASYPLTGDTR</a> | Deamidated Q1 26.31%  |
| 32.3  | 3551.5311 | 1.0162 | <a href="#">QVFPGLNYCTSGAYSNASSTDSASYPLTGDTR</a> |                       |
| 29.1  | 3551.5311 | 1.0162 | <a href="#">QVFPGLNYCTSGAYSNASSTDSASYPLTGDTR</a> |                       |
| 27.4  | 3551.5311 | 1.0162 | <a href="#">QVFPGLNYCTSGAYSNASSTDSASYPLTGDTR</a> |                       |
| 4.5   | 3550.5524 | 1.9948 | <a href="#">DLQICQTILDPLNDMMDTVSEEDQNPDALAK</a>  |                       |
| 4.5   | 3550.5524 | 1.9948 | <a href="#">DLQICQTILDPLNDMMDTVSEEDQNPDALAK</a>  |                       |
| 4.3   | 3551.5365 | 1.0108 | <a href="#">ALADPNQDEESVTDMMMDNLPDLITQCIQLDK</a> |                       |
| 4.3   | 3550.5524 | 1.9948 | <a href="#">ALADPNQDEESVTDMMMDNLPDLITQCIQLDK</a> |                       |

Mascot: <http://www.matrixscience.com/>

# MASCOT SCIENCE Mascot Search Results

## Peptide View

MS/MS Fragmentation of **AELSNHTRPVILVPGCLGNQLEAK**

Found in **P04180** in **con\_Xuniprot\_HUMAN3**, LCAT\_HUMAN Phosphatidylcholine-sterol acyltransferase OS=Homo sapiens GN=LCAT PE=1 SV=1

Match to Query 22317: 2616.375582 from(873.132470,3+) intensity(179783.5469) rtinseconds(1540) scans(3807) index(3783)

Title: 111019\_Est\_ISCardio\_NMI\_YP\_G\_6Spectrum3128\_scans\_3807

Data file C:\mascot\20140703\_Tmgf\_1D\CSV\_UseAnalysis\MasterCSV\All\_Glyco\mgf\ptm\UC18ERLIC\_PTM\_35D.mgf

Click mouse within plot area to zoom in by factor of two about that point

Or, to Da

Label all possible matches Label matches used for scoring

Show Y-axis

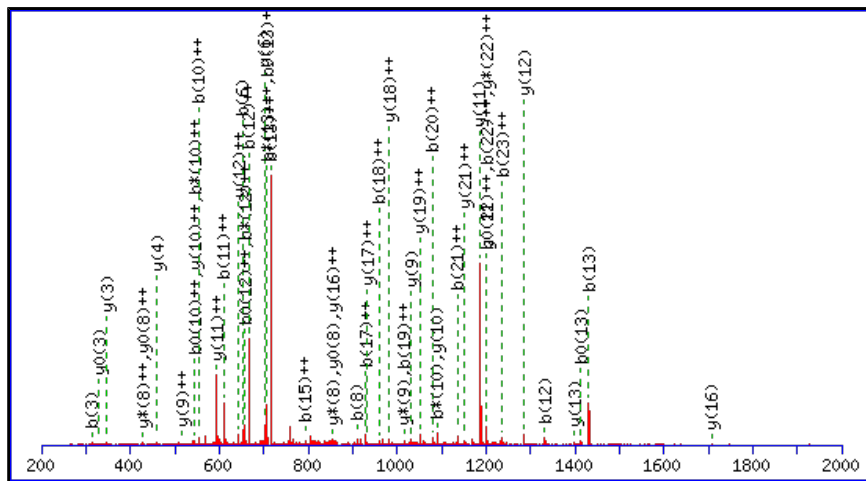

Monoisotopic mass of neutral peptide Mr(calc): 2616.3693

Fixed modifications: Carbamidomethyl (C) (apply to specified residues or termini only)

Variable modifications:

N5 : Deamidated (NQ)

Ions Score: 67 Expect: 3.5e-005

Matches : 52/262 fragment ions using 89 most intense peaks ([help](#))

| #  | b                | b <sup>++</sup>  | b <sup>*</sup>   | b <sup>**</sup> | b <sup>0</sup>   | b <sup>0++</sup> | Seq. | y                | y <sup>++</sup>  | y <sup>*</sup>   | y <sup>**</sup>  | y <sup>0</sup>  | y <sup>0++</sup> | #  |
|----|------------------|------------------|------------------|-----------------|------------------|------------------|------|------------------|------------------|------------------|------------------|-----------------|------------------|----|
| 1  | 72.0444          | 36.5258          |                  |                 |                  |                  | A    |                  |                  |                  |                  |                 |                  | 24 |
| 2  | 201.0870         | 101.0471         |                  |                 | 183.0764         | 92.0418          | E    | 2546.3395        | 1273.6734        | 2529.3130        | 1265.1601        | 2528.3290       | 1264.6681        | 23 |
| 3  | <b>314.1710</b>  | 157.5892         |                  |                 | 296.1605         | 148.5839         | L    | 2417.2969        | 1209.1521        | 2400.2704        | <b>1200.6388</b> | 2399.2864       | <b>1200.1468</b> | 22 |
| 4  | 401.2031         | 201.1052         |                  |                 | 383.1925         | 192.0999         | S    | 2304.2129        | <b>1152.6101</b> | 2287.1863        | 1144.0968        | 2286.2023       | 1143.6048        | 21 |
| 5  | 516.2300         | 258.6186         | 499.2035         | 250.1054        | 498.2195         | 249.6134         | N    | 2217.1808        | 1109.0941        | 2200.1543        | 1100.5808        | 2199.1703       | 1100.0888        | 20 |
| 6  | <b>653.2889</b>  | 327.1481         | 636.2624         | 318.6348        | 635.2784         | 318.1428         | H    | 2102.1539        | <b>1051.5806</b> | 2085.1274        | 1043.0673        | 2084.1433       | 1042.5753        | 19 |
| 7  | 754.3366         | 377.6719         | 737.3101         | 369.1587        | 736.3260         | 368.6667         | T    | 1965.0950        | <b>983.0511</b>  | 1948.0684        | 974.5379         | 1947.0844       | 974.0459         | 18 |
| 8  | <b>910.4377</b>  | 455.7225         | 893.4112         | 447.2092        | 892.4272         | 446.7172         | R    | 1864.0473        | <b>932.5273</b>  | 1847.0208        | 924.0140         | 1846.0368       | 923.5220         | 17 |
| 9  | 1007.4905        | 504.2489         | 990.4639         | 495.7356        | 989.4799         | 495.2436         | P    | <b>1707.9462</b> | <b>854.4767</b>  | 1690.9197        | 845.9635         | 1689.9356       | 845.4715         | 16 |
| 10 | 1106.5589        | <b>553.7831</b>  | <b>1089.5323</b> | <b>545.2698</b> | 1088.5483        | <b>544.7778</b>  | V    | 1610.8934        | 805.9504         | 1593.8669        | 797.4371         | 1592.8829       | 796.9451         | 15 |
| 11 | 1219.6430        | <b>610.3251</b>  | 1202.6164        | 601.8118        | <b>1201.6324</b> | 601.3198         | I    | 1511.8250        | 756.4162         | 1494.7985        | 747.9029         | 1493.8145       | 747.4109         | 14 |
| 12 | <b>1332.7270</b> | <b>666.8672</b>  | 1315.7005        | <b>658.3539</b> | 1314.7165        | <b>657.8619</b>  | L    | <b>1398.7410</b> | 699.8741         | 1381.7144        | 691.3608         | 1380.7304       | 690.8688         | 13 |
| 13 | <b>1431.7954</b> | <b>716.4014</b>  | 1414.7689        | <b>707.8881</b> | <b>1413.7849</b> | <b>707.3961</b>  | V    | <b>1285.6569</b> | <b>643.3321</b>  | 1268.6304        | 634.8188         | 1267.6463       | 634.3268         | 12 |
| 14 | 1528.8482        | 764.9277         | 1511.8217        | 756.4145        | 1510.8376        | 755.9225         | P    | <b>1186.5885</b> | <b>593.7979</b>  | 1169.5619        | 585.2846         | 1168.5779       | 584.7926         | 11 |
| 15 | 1585.8697        | <b>793.4385</b>  | 1568.8431        | 784.9252        | 1567.8591        | 784.4332         | G    | <b>1089.5357</b> | <b>545.2715</b>  | 1072.5092        | 536.7582         | 1071.5252       | 536.2662         | 10 |
| 16 | 1745.9003        | 873.4538         | 1728.8738        | 864.9405        | 1727.8898        | 864.4485         | C    | <b>1032.5143</b> | <b>516.7608</b>  | <b>1015.4877</b> | 508.2475         | 1014.5037       | 507.7555         | 9  |
| 17 | 1858.9844        | <b>929.9958</b>  | 1841.9578        | 921.4826        | 1840.9738        | 920.9905         | L    | 872.4836         | 436.7454         | <b>855.4571</b>  | <b>428.2322</b>  | <b>854.4730</b> | <b>427.7402</b>  | 8  |
| 18 | 1916.0058        | <b>958.5066</b>  | 1898.9793        | 949.9933        | 1897.9953        | 949.5013         | G    | 759.3995         | 380.2034         | 742.3730         | 371.6901         | 741.3890        | 371.1981         | 7  |
| 19 | 2030.0488        | <b>1015.5280</b> | 2013.0222        | 1007.0147       | 2012.0382        | 1006.5227        | N    | <b>702.3781</b>  | 351.6927         | 685.3515         | 343.1794         | 684.3675        | 342.6874         | 6  |
| 20 | 2158.1073        | <b>1079.5573</b> | 2141.0808        | 1071.0440       | 2140.0968        | 1070.5520        | Q    | 588.3352         | 294.6712         | 571.3086         | 286.1579         | 570.3246        | 285.6659         | 5  |
| 21 | 2271.1914        | <b>1136.0993</b> | 2254.1649        | 1127.5861       | 2253.1808        | 1127.0941        | L    | <b>460.2766</b>  | 230.6419         | 443.2500         | 222.1287         | 442.2660        | 221.6366         | 4  |
| 22 | 2400.2340        | <b>1200.6206</b> | 2383.2075        | 1192.1074       | 2382.2234        | 1191.6154        | E    | <b>347.1925</b>  | 174.0999         | 330.1660         | 165.5866         | <b>329.1819</b> | 165.0946         | 3  |

|    |           |                  |           |           |           |           |   |          |          |          |          |  |  |   |
|----|-----------|------------------|-----------|-----------|-----------|-----------|---|----------|----------|----------|----------|--|--|---|
| 23 | 2471.2711 | <b>1236.1392</b> | 2454.2446 | 1227.6259 | 2453.2606 | 1227.1339 | A | 218.1499 | 109.5786 | 201.1234 | 101.0653 |  |  | 2 |
| 24 |           |                  |           |           |           |           | K | 147.1128 | 74.0600  | 130.0863 | 65.5468  |  |  | 1 |

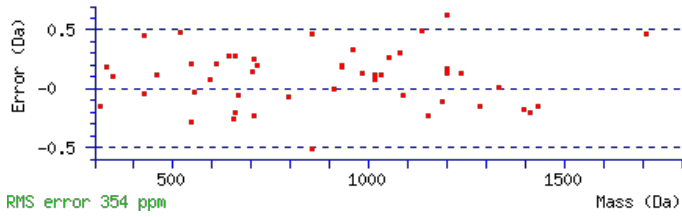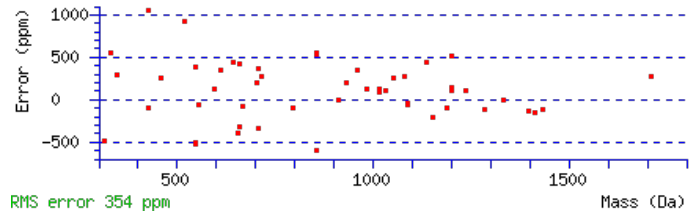

NCBI BLAST search of [AELSNHTRPVILVPGCLGNQLEAK](#)

(Parameters: blastp, nr protein database, expect=20000, no filter, PAM30)

Other BLAST [web gateways](#)

All matches to this query

| Score | Mr(calc)  | Delta   | Sequence                                    | Site Analysis        |
|-------|-----------|---------|---------------------------------------------|----------------------|
| 67.0  | 2616.3693 | 0.0062  | <a href="#">AELSNHTRPVILVPGCLGNQLEAK</a>    | Deamidated N5 94.40% |
| 51.7  | 2616.3693 | 0.0062  | <a href="#">AELSNHTRPVILVPGCLGNQLEAK</a>    | Deamidated Q20 2.80% |
| 51.7  | 2616.3693 | 0.0062  | <a href="#">AELSNHTRPVILVPGCLGNQLEAK</a>    | Deamidated N19 2.80% |
| 41.9  | 2615.3853 | 0.9903  | <a href="#">AELSNHTRPVILVPGCLGNQLEAK</a>    |                      |
| 11.1  | 2614.3642 | 2.0114  | <a href="#">ELPVNAQNYVRFIEDELQIPVK</a>      |                      |
| 9.6   | 2616.3880 | -0.0124 | <a href="#">MIWEQNTGIIVMITNLVEKGRR</a>      |                      |
| 8.4   | 2616.3628 | 0.0128  | <a href="#">SPATMRPMLAPKTAVAAAPPSVAGHR</a>  |                      |
| 6.2   | 2616.3812 | -0.0056 | <a href="#">VVAPNAYYTRPVYPNNIAIAPRR</a>     |                      |
| 5.8   | 2615.3653 | 1.0102  | <a href="#">YNGIREEALQTAQALSDQTVKTLK</a>    |                      |
| 4.8   | 2616.3772 | -0.0016 | <a href="#">SVAATEGALLPQTTPSPRNLIIPHGHR</a> |                      |

Mascot: <http://www.matrixscience.com/>



# MASCOT SCIENCE Mascot Search Results

## Peptide View

MS/MS Fragmentation of **VIDFNCTTSSVSSALANTK**

Found in **P04196** in **con\_Xuniprot\_HUMAN3**, HRG\_HUMAN Histidine-rich glycoprotein OS=Homo sapiens GN=HRG PE=1 SV=1

Match to Query 12292: 2014.954708 from(1008.484630,2+) intensity(25883.1406) rtinseconds(3079) scans(7899) index(5950)

Title: 111019\_Est\_ISCardio\_NMI\_YP\_G\_8Spectrum6988\_scans\_\_7899

Data file C:\\mascot\\20140703\_Tmgf\_1D\\CSV\_UseAnalysis\\MasterCSV\\All\_Glyco\\mgf\\ptm\\UC18ERLIC\_PTM\_35D.mgf

Click mouse within plot area to zoom in by factor of two about that point

Or, to Da

Label all possible matches Label matches used for scoring

Show Y-axis

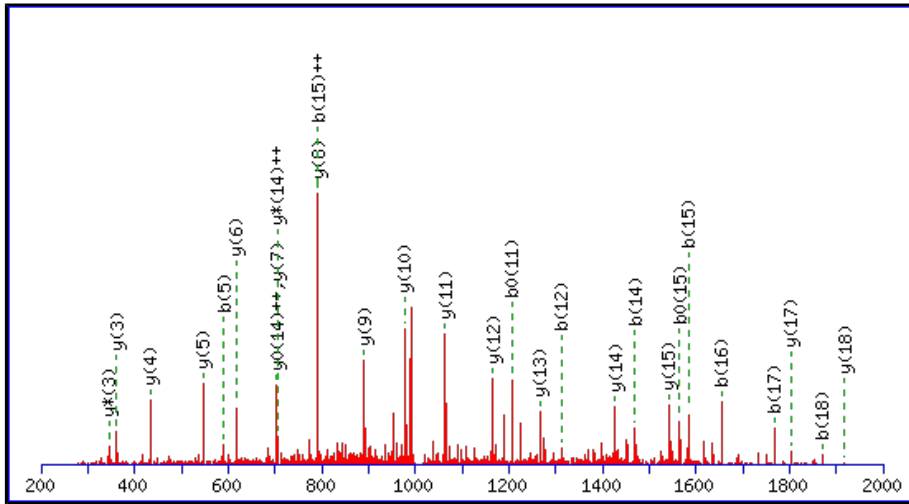

Monoisotopic mass of neutral peptide Mr(calc): 2014.9517

Fixed modifications: Carbamidomethyl (C) (apply to specified residues or termini only)

Variable modifications:

N5 : Deamidated (NQ)

Ions Score: 142 Expect: 1.3e-012

Matches : 28/202 fragment ions using 33 most intense peaks ([help](#))

| #  | b         | b <sup>++</sup> | b <sup>*</sup> | b <sup>*++</sup> | b <sup>0</sup> | b <sup>0++</sup> | Seq. | y         | y <sup>++</sup> | y <sup>*</sup> | y <sup>*++</sup> | y <sup>0</sup> | y <sup>0++</sup> | #  |
|----|-----------|-----------------|----------------|------------------|----------------|------------------|------|-----------|-----------------|----------------|------------------|----------------|------------------|----|
| 1  | 100.0757  | 50.5415         |                |                  |                |                  | V    |           |                 |                |                  |                |                  | 19 |
| 2  | 213.1598  | 107.0835        |                |                  |                |                  | I    | 1916.8906 | 958.9489        | 1899.8641      | 950.4357         | 1898.8800      | 949.9437         | 18 |
| 3  | 328.1867  | 164.5970        |                |                  | 310.1761       | 155.5917         | D    | 1803.8065 | 902.4069        | 1786.7800      | 893.8936         | 1785.7960      | 893.4016         | 17 |
| 4  | 475.2551  | 238.1312        |                |                  | 457.2445       | 229.1259         | F    | 1688.7796 | 844.8934        | 1671.7530      | 836.3802         | 1670.7690      | 835.8882         | 16 |
| 5  | 590.2821  | 295.6447        | 573.2555       | 287.1314         | 572.2715       | 286.6394         | N    | 1541.7112 | 771.3592        | 1524.6846      | 762.8460         | 1523.7006      | 762.3539         | 15 |
| 6  | 750.3127  | 375.6600        | 733.2862       | 367.1467         | 732.3021       | 366.6547         | C    | 1426.6842 | 713.8458        | 1409.6577      | 705.3325         | 1408.6737      | 704.8405         | 14 |
| 7  | 851.3604  | 426.1838        | 834.3338       | 417.6706         | 833.3498       | 417.1785         | T    | 1266.6536 | 633.8304        | 1249.6270      | 625.3172         | 1248.6430      | 624.8251         | 13 |
| 8  | 952.4081  | 476.7077        | 935.3815       | 468.1944         | 934.3975       | 467.7024         | T    | 1165.6059 | 583.3066        | 1148.5794      | 574.7933         | 1147.5953      | 574.3013         | 12 |
| 9  | 1039.4401 | 520.2237        | 1022.4135      | 511.7104         | 1021.4295      | 511.2184         | S    | 1064.5582 | 532.7828        | 1047.5317      | 524.2695         | 1046.5477      | 523.7775         | 11 |
| 10 | 1126.4721 | 563.7397        | 1109.4456      | 555.2264         | 1108.4616      | 554.7344         | S    | 977.5262  | 489.2667        | 960.4997       | 480.7535         | 959.5156       | 480.2615         | 10 |
| 11 | 1225.5405 | 613.2739        | 1208.5140      | 604.7606         | 1207.5300      | 604.2686         | V    | 890.4942  | 445.7507        | 873.4676       | 437.2374         | 872.4836       | 436.7454         | 9  |
| 12 | 1312.5726 | 656.7899        | 1295.5460      | 648.2766         | 1294.5620      | 647.7846         | S    | 791.4258  | 396.2165        | 774.3992       | 387.7032         | 773.4152       | 387.2112         | 8  |
| 13 | 1399.6046 | 700.3059        | 1382.5780      | 691.7927         | 1381.5940      | 691.3006         | S    | 704.3937  | 352.7005        | 687.3672       | 344.1872         | 686.3832       | 343.6952         | 7  |
| 14 | 1470.6417 | 735.8245        | 1453.6152      | 727.3112         | 1452.6311      | 726.8192         | A    | 617.3617  | 309.1845        | 600.3352       | 300.6712         | 599.3511       | 300.1792         | 6  |
| 15 | 1583.7258 | 792.3665        | 1566.6992      | 783.8532         | 1565.7152      | 783.3612         | L    | 546.3246  | 273.6659        | 529.2980       | 265.1527         | 528.3140       | 264.6606         | 5  |
| 16 | 1654.7629 | 827.8851        | 1637.7363      | 819.3718         | 1636.7523      | 818.8798         | A    | 433.2405  | 217.1239        | 416.2140       | 208.6106         | 415.2300       | 208.1186         | 4  |
| 17 | 1768.8058 | 884.9065        | 1751.7793      | 876.3933         | 1750.7952      | 875.9013         | N    | 362.2034  | 181.6053        | 345.1769       | 173.0921         | 344.1928       | 172.6001         | 3  |
| 18 | 1869.8535 | 935.4304        | 1852.8269      | 926.9171         | 1851.8429      | 926.4251         | T    | 248.1605  | 124.5839        | 231.1339       | 116.0706         | 230.1499       | 115.5786         | 2  |
| 19 |           |                 |                |                  |                |                  | K    | 147.1128  | 74.0600         | 130.0863       | 65.5468          |                |                  | 1  |

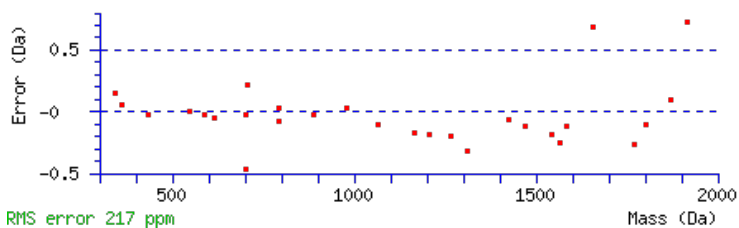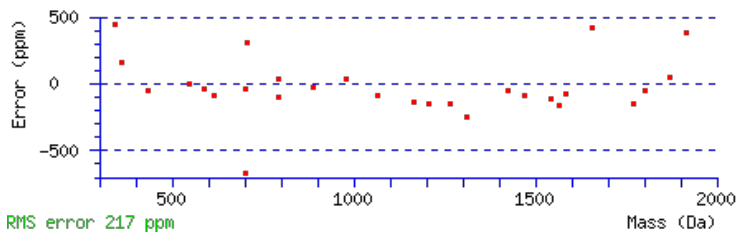

NCBI **BLAST** search of [VIDFNCTTSSVSSALANTK](#)

(Parameters: blastp, nr protein database, expect=20000, no filter, PAM30)

Other BLAST [web gateways](#)

**All matches to this query**

| Score | Mr(calc)  | Delta  | Sequence                             | Site Analysis         |
|-------|-----------|--------|--------------------------------------|-----------------------|
| 142.4 | 2014.9517 | 0.0030 | <a href="#">VIDFNCTTSSVSSALANTK</a>  | Deamidated N5 100.00% |
| 78.9  | 2014.9517 | 0.0030 | <a href="#">VIDFNCTTSSVSSALANTK</a>  | Deamidated N17 0.00%  |
| 6.8   | 2014.9531 | 0.0016 | <a href="#">MNTSREADHHDLLTETK</a>    |                       |
| 6.5   | 2013.9425 | 1.0122 | <a href="#">TQNMNNPLKLHNRNATK</a>    |                       |
| 5.0   | 2012.9473 | 2.0074 | <a href="#">MVPESGSVSTSGFSAGRNVK</a> |                       |
| 4.3   | 2013.9425 | 1.0122 | <a href="#">TQNMNNPLKLHNRNATK</a>    |                       |
| 3.2   | 2014.9452 | 0.0095 | <a href="#">YRDSMAIQELMASGTNTK</a>   |                       |
| 2.4   | 2014.9537 | 0.0010 | <a href="#">VWQGSKYIEFGQPRQER</a>    |                       |
| 1.2   | 2014.9492 | 0.0055 | <a href="#">GAVYAENCILAAFSICQK</a>   |                       |
| 1.0   | 2014.9492 | 0.0055 | <a href="#">GAVYAENCILAAFSICQK</a>   |                       |

Mascot: <http://www.matrixscience.com/>

# MATRIX SCIENCE Mascot Search Results

## Peptide View

MS/MS Fragmentation of **VIDFNCTTSSVSSALANTK**

Found in **P04196** in **con\_Xuniprot\_HUMAN3**, HRG\_HUMAN Histidine-rich glycoprotein OS=Homo sapiens GN=HRG PE=1 SV=1

Match to Query 12496: 2015.942608 from(1008.978580,2+) intensity(48878.3750) rtinseconds(1676) scans(4377) index(4426)

Title: 111019\_Est\_ISCardio\_NMI\_YP\_G\_7Spectrum3714\_scans\_\_4377

Data file C:\\mascot\\20140703\_Tmgf\_1D\\CSV\_UseAnalysis\\MasterCSV\\All\_Glyco\\mgf\\ptm\\UC18ERLIC\_PTM\_35D.mgf

Click mouse within plot area to zoom in by factor of two about that point

Or, to Da

Label all possible matches Label matches used for scoring

Show Y-axis

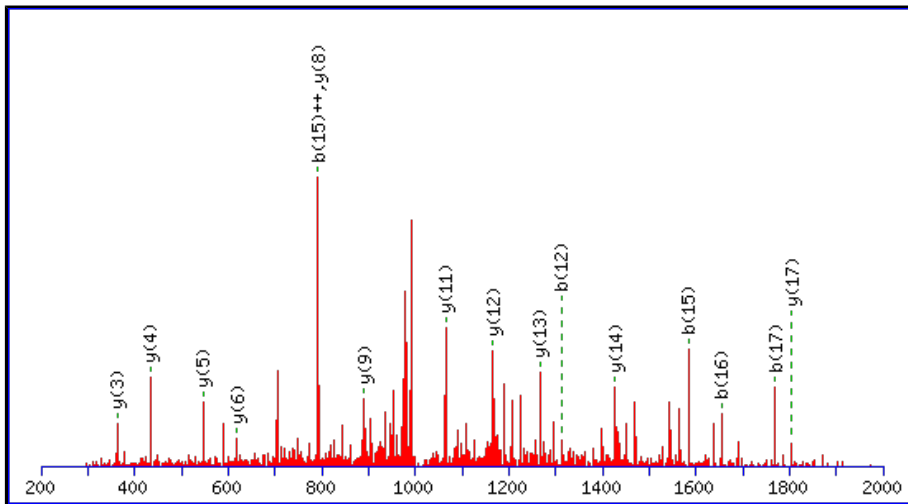

Monoisotopic mass of neutral peptide Mr(calc): 2015.9357

Fixed modifications: Carbamidomethyl (C) (apply to specified residues or termini only)

Variable modifications:

N5 : Deamidated (NQ)

N17 : Deamidated (NQ)

Ions Score: 105 Expect: 5.7e-009

Matches : 16/202 fragment ions using 17 most intense peaks ([help](#))

| #  | b                | b <sup>++</sup> | b*        | b <sup>+++</sup> | b <sup>0</sup> | b <sup>0++</sup> | Seq. | y                | y <sup>++</sup> | y*        | y <sup>+++</sup> | y <sup>0</sup> | y <sup>0++</sup> | #  |
|----|------------------|-----------------|-----------|------------------|----------------|------------------|------|------------------|-----------------|-----------|------------------|----------------|------------------|----|
| 1  | 100.0757         | 50.5415         |           |                  |                |                  | V    |                  |                 |           |                  |                |                  | 19 |
| 2  | 213.1598         | 107.0835        |           |                  |                |                  | I    | 1917.8746        | 959.4409        | 1900.8481 | 950.9277         | 1899.8641      | 950.4357         | 18 |
| 3  | 328.1867         | 164.5970        |           |                  | 310.1761       | 155.5917         | D    | <b>1804.7906</b> | 902.8989        | 1787.7640 | 894.3856         | 1786.7800      | 893.8936         | 17 |
| 4  | 475.2551         | 238.1312        |           |                  | 457.2445       | 229.1259         | F    | 1689.7636        | 845.3854        | 1672.7371 | 836.8722         | 1671.7530      | 836.3802         | 16 |
| 5  | 590.2821         | 295.6447        | 573.2555  | 287.1314         | 572.2715       | 286.6394         | N    | 1542.6952        | 771.8512        | 1525.6686 | 763.3380         | 1524.6846      | 762.8460         | 15 |
| 6  | 750.3127         | 375.6600        | 733.2862  | 367.1467         | 732.3021       | 366.6547         | C    | <b>1427.6683</b> | 714.3378        | 1410.6417 | 705.8245         | 1409.6577      | 705.3325         | 14 |
| 7  | 851.3604         | 426.1838        | 834.3338  | 417.6706         | 833.3498       | 417.1785         | T    | <b>1267.6376</b> | 634.3224        | 1250.6111 | 625.8092         | 1249.6270      | 625.3172         | 13 |
| 8  | 952.4081         | 476.7077        | 935.3815  | 468.1944         | 934.3975       | 467.7024         | T    | <b>1166.5899</b> | 583.7986        | 1149.5634 | 575.2853         | 1148.5794      | 574.7933         | 12 |
| 9  | 1039.4401        | 520.2237        | 1022.4135 | 511.7104         | 1021.4295      | 511.2184         | S    | <b>1065.5422</b> | 533.2748        | 1048.5157 | 524.7615         | 1047.5317      | 524.2695         | 11 |
| 10 | 1126.4721        | 563.7397        | 1109.4456 | 555.2264         | 1108.4616      | 554.7344         | S    | 978.5102         | 489.7587        | 961.4837  | 481.2455         | 960.4997       | 480.7535         | 10 |
| 11 | 1225.5405        | 613.2739        | 1208.5140 | 604.7606         | 1207.5300      | 604.2686         | V    | <b>891.4782</b>  | 446.2427        | 874.4516  | 437.7295         | 873.4676       | 437.2374         | 9  |
| 12 | <b>1312.5726</b> | 656.7899        | 1295.5460 | 648.2766         | 1294.5620      | 647.7846         | S    | <b>792.4098</b>  | 396.7085        | 775.3832  | 388.1953         | 774.3992       | 387.7032         | 8  |
| 13 | 1399.6046        | 700.3059        | 1382.5780 | 691.7927         | 1381.5940      | 691.3006         | S    | 705.3777         | 353.1925        | 688.3512  | 344.6792         | 687.3672       | 344.1872         | 7  |
| 14 | 1470.6417        | 735.8245        | 1453.6152 | 727.3112         | 1452.6311      | 726.8192         | A    | <b>618.3457</b>  | 309.6765        | 601.3192  | 301.1632         | 600.3352       | 300.6712         | 6  |
| 15 | <b>1583.7258</b> | <b>792.3665</b> | 1566.6992 | 783.8532         | 1565.7152      | 783.3612         | L    | <b>547.3086</b>  | 274.1579        | 530.2821  | 265.6447         | 529.2980       | 265.1527         | 5  |
| 16 | <b>1654.7629</b> | 827.8851        | 1637.7363 | 819.3718         | 1636.7523      | 818.8798         | A    | <b>434.2245</b>  | 217.6159        | 417.1980  | 209.1026         | 416.2140       | 208.6106         | 4  |
| 17 | <b>1769.7898</b> | 885.3985        | 1752.7633 | 876.8853         | 1751.7793      | 876.3933         | N    | <b>363.1874</b>  | 182.0974        | 346.1609  | 173.5841         | 345.1769       | 173.0921         | 3  |
| 18 | 1870.8375        | 935.9224        | 1853.8110 | 927.4091         | 1852.8269      | 926.9171         | T    | 248.1605         | 124.5839        | 231.1339  | 116.0706         | 230.1499       | 115.5786         | 2  |
| 19 |                  |                 |           |                  |                |                  | K    | 147.1128         | 74.0600         | 130.0863  | 65.5468          |                |                  | 1  |

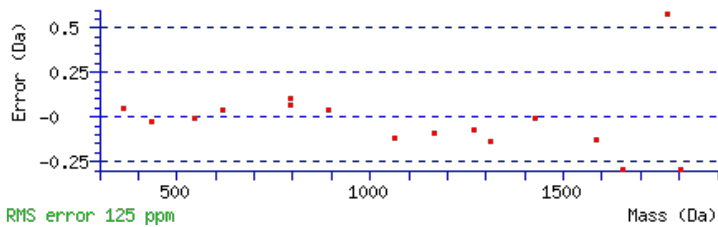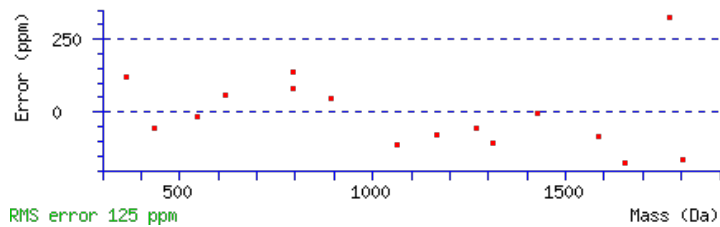

NCBI **BLAST** search of [VIDENCTSSVSSALANTK](#)  
 (Parameters: blastp, nr protein database, expect=20000, no filter, PAM30)  
 Other BLAST [web gateways](#)

**All matches to this query**

| Score | Mr(calc)  | Delta  | Sequence                           |
|-------|-----------|--------|------------------------------------|
| 105.4 | 2015.9357 | 0.0069 | <a href="#">VIDENCTSSVSSALANTK</a> |
| 4.8   | 2015.9371 | 0.0055 | <a href="#">MNTSRFADHDDLLETETK</a> |
| 4.4   | 2015.9411 | 0.0015 | <a href="#">DPWSMYQLQYVSRSEK</a>   |
| 2.4   | 2014.9452 | 0.9974 | <a href="#">YRDSMAIQELMASGTNTK</a> |
| 2.4   | 2014.9492 | 0.9934 | <a href="#">GAVYAENCILAAFSICQK</a> |
| 1.8   | 2014.9371 | 1.0055 | <a href="#">GQVENTIDENSDFVSLTK</a> |
| 0.7   | 2013.9360 | 2.0066 | <a href="#">LETEMQSYRCRLNAAR</a>   |

Mascot: <http://www.matrixscience.com/>

# MASCOT SCIENCE Mascot Search Results

## Peptide View

MS/MS Fragmentation of **GQVYLQCGTPCNLTCR**

Found in **P04275** in **con\_Xuniprot\_HUMAN3**, VWF\_HUMAN von Willebrand factor OS=Homo sapiens GN=VWF PE=1 SV=4

Match to Query 11736: 1926.845928 from(964.430240,2+) intensity(12668.8857) rtinseconds(1004) scans(2173) index(27780)

Title: 111019\_Est\_MI\_YS\_G\_11Spectrum1853\_scans\_\_2173

Data file C:\\mascot\\20140703\_Tmgf\_1D\\CSV\_UseAnalysis\\MasterCSV\\All\_Glyco\\mgf\\ptm\\UC18ERLIC\_PTM\_35D.mgf

Click mouse within plot area to zoom in by factor of two about that point

Or, to Da

Label all possible matches Label matches used for scoring

Show Y-axis

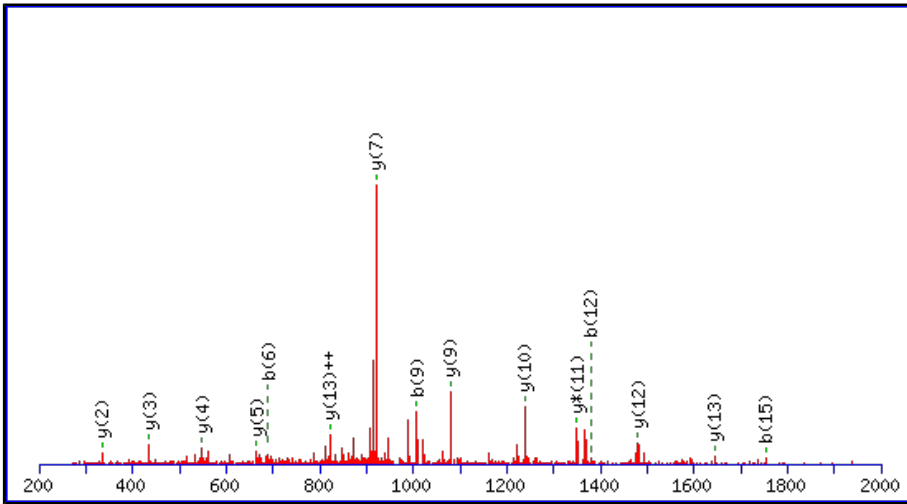

Monoisotopic mass of neutral peptide Mr(calc): 1926.8387

Fixed modifications: Carbamidomethyl (C) (apply to specified residues or termini only)

Variable modifications:

N12 : Deamidated (NQ)

Ions Score: 73 Expect: 4.5e-006

Matches : 15/158 fragment ions using 17 most intense peaks ([help](#))

| #  | b                | b <sup>++</sup> | b*        | b <sup>+++</sup> | b <sup>0</sup> | b <sup>0++</sup> | Seq. | y                | y <sup>++</sup> | y*               | y <sup>+++</sup> | y <sup>0</sup> | y <sup>0++</sup> | #  |
|----|------------------|-----------------|-----------|------------------|----------------|------------------|------|------------------|-----------------|------------------|------------------|----------------|------------------|----|
| 1  | 58.0287          | 29.5180         |           |                  |                |                  | G    |                  |                 |                  |                  |                |                  | 16 |
| 2  | 186.0873         | 93.5473         | 169.0608  | 85.0340          |                |                  | Q    | 1870.8245        | 935.9159        | 1853.7979        | 927.4026         | 1852.8139      | 926.9106         | 15 |
| 3  | 285.1557         | 143.0815        | 268.1292  | 134.5682         |                |                  | V    | 1742.7659        | 871.8866        | 1725.7393        | 863.3733         | 1724.7553      | 862.8813         | 14 |
| 4  | 448.2191         | 224.6132        | 431.1925  | 216.0999         |                |                  | Y    | <b>1643.6975</b> | <b>822.3524</b> | 1626.6709        | 813.8391         | 1625.6869      | 813.3471         | 13 |
| 5  | 561.3031         | 281.1552        | 544.2766  | 272.6419         |                |                  | L    | <b>1480.6341</b> | 740.8207        | 1463.6076        | 732.3074         | 1462.6236      | 731.8154         | 12 |
| 6  | <b>689.3617</b>  | 345.1845        | 672.3352  | 336.6712         |                |                  | Q    | 1367.5501        | 684.2787        | <b>1350.5235</b> | 675.7654         | 1349.5395      | 675.2734         | 11 |
| 7  | 849.3924         | 425.1998        | 832.3658  | 416.6865         |                |                  | C    | <b>1239.4915</b> | 620.2494        | 1222.4649        | 611.7361         | 1221.4809      | 611.2441         | 10 |
| 8  | 906.4138         | 453.7105        | 889.3873  | 445.1973         |                |                  | G    | <b>1079.4608</b> | 540.2341        | 1062.4343        | 531.7208         | 1061.4503      | 531.2288         | 9  |
| 9  | <b>1007.4615</b> | 504.2344        | 990.4349  | 495.7211         | 989.4509       | 495.2291         | T    | 1022.4394        | 511.7233        | 1005.4128        | 503.2101         | 1004.4288      | 502.7180         | 8  |
| 10 | 1104.5143        | 552.7608        | 1087.4877 | 544.2475         | 1086.5037      | 543.7555         | P    | <b>921.3917</b>  | 461.1995        | 904.3652         | 452.6862         | 903.3811       | 452.1942         | 7  |
| 11 | 1264.5449        | 632.7761        | 1247.5184 | 624.2628         | 1246.5343      | 623.7708         | C    | 824.3389         | 412.6731        | 807.3124         | 404.1598         | 806.3284       | 403.6678         | 6  |
| 12 | <b>1379.5719</b> | 690.2896        | 1362.5453 | 681.7763         | 1361.5613      | 681.2843         | N    | <b>664.3083</b>  | 332.6578        | 647.2817         | 324.1445         | 646.2977       | 323.6525         | 5  |
| 13 | 1492.6559        | 746.8316        | 1475.6294 | 738.3183         | 1474.6454      | 737.8263         | L    | <b>549.2813</b>  | 275.1443        | 532.2548         | 266.6310         | 531.2708       | 266.1390         | 4  |
| 14 | 1593.7036        | 797.3554        | 1576.6770 | 788.8422         | 1575.6930      | 788.3502         | T    | <b>436.1973</b>  | 218.6023        | 419.1707         | 210.0890         | 418.1867       | 209.5970         | 3  |
| 15 | <b>1753.7342</b> | 877.3708        | 1736.7077 | 868.8575         | 1735.7237      | 868.3655         | C    | <b>335.1496</b>  | 168.0784        | 318.1231         | 159.5652         |                |                  | 2  |
| 16 |                  |                 |           |                  |                |                  | R    | 175.1190         | 88.0631         | 158.0924         | 79.5498          |                |                  | 1  |

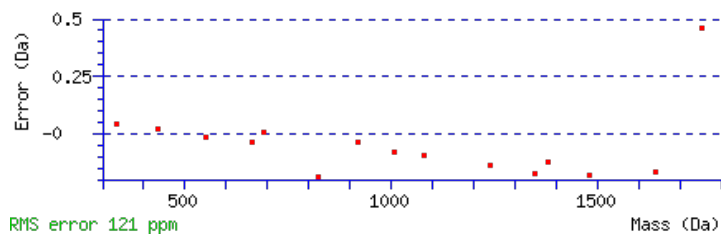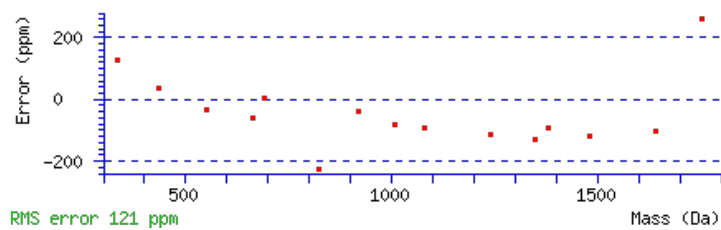

NCBI **BLAST** search of [GQVYLQCGTPCNLTCR](#)

(Parameters: blastp, nr protein database, expect=20000, no filter, PAM30)

Other BLAST [web gateways](#)

**All matches to this query**

| Score | Mr(calc)  | Delta  | Sequence                         | Site Analysis          |
|-------|-----------|--------|----------------------------------|------------------------|
| 73.2  | 1926.8387 | 0.0073 | <a href="#">GQVYLQCGTPCNLTCR</a> | Deamidated N12 100.00% |
| 20.5  | 1926.8387 | 0.0073 | <a href="#">GQVYLQCGTPCNLTCR</a> | Deamidated Q6 0.00%    |
| 10.1  | 1925.8369 | 1.0091 | <a href="#">MHINKCAMCQSIFDR</a>  |                        |
| 9.7   | 1926.8387 | 0.0073 | <a href="#">GQVYLQCGTPCNLTCR</a> | Deamidated Q2 0.00%    |
| 8.1   | 1926.8451 | 0.0008 | <a href="#">AKMEEAFNQSONLCQK</a> |                        |
| 0.5   | 1926.8451 | 0.0008 | <a href="#">AKMEEAFNQSONLCQK</a> |                        |
| 0.5   | 1926.8451 | 0.0008 | <a href="#">AKMEEAFNQSONLCQK</a> |                        |

Mascot: <http://www.matrixscience.com/>

# MASCOT SCIENCE Mascot Search Results

## Peptide View

MS/MS Fragmentation of **ASPPSSSCNISSGEMQK**

Found in **P04275** in **con\_Xuniprot\_HUMAN3**, VWF\_HUMAN von Willebrand factor OS=Homo sapiens GN=VWF PE=1 SV=4

Match to Query 10184: 1782.746448 from(892.380500,2+) intensity(1824.0968) rtinseconds(290) scans(391) index(27719)

Title: 111019\_Est\_MI\_YS\_G\_11Spectrum281\_scans\_\_391

Data file C:\\mascot\\20140703\_Tmgf\_1D\\CSV\_UseAnalysis\\MasterCSV\\All\_Glyco\\mgf\\ptm\\UC18ERLIC\_PTM\_35D.mgf

Click mouse within plot area to zoom in by factor of two about that point

Or, to Da

Label all possible matches Label matches used for scoring

Show Y-axis

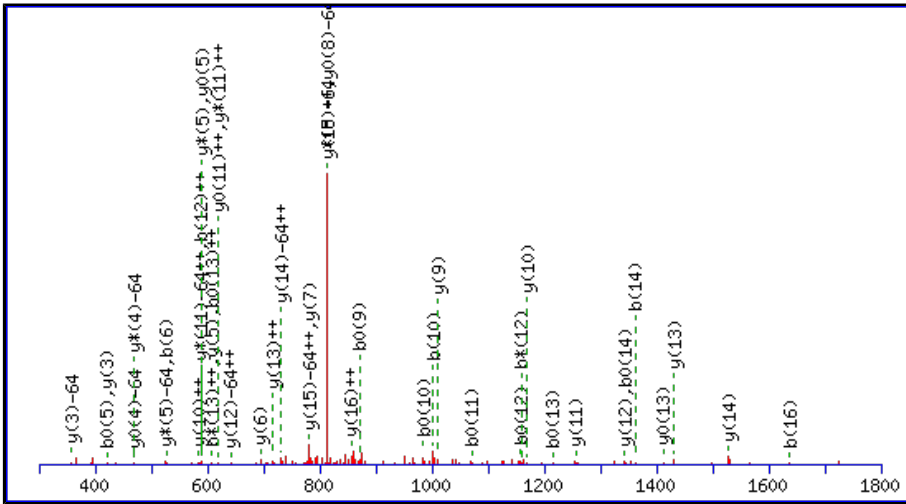

Monoisotopic mass of neutral peptide Mr(calc): 1782.7400

Fixed modifications: Carbamidomethyl (C) (apply to specified residues or termini only)

Variable modifications:

N9 : Deamidated (NQ)

M15 : Oxidation (M), with neutral losses 0.0000(shown in table), 63.9983

Ions Score: 43 Expect: 0.0022

Matches : 44/262 fragment ions using 84 most intense peaks ([help](#))

| #  | b         | b <sup>++</sup> | b <sup>*</sup> | b <sup>*++</sup> | b <sup>0</sup> | b <sup>0++</sup> | Seq. | y         | y <sup>++</sup> | y <sup>*</sup> | y <sup>*++</sup> | y <sup>0</sup> | y <sup>0++</sup> | #  |
|----|-----------|-----------------|----------------|------------------|----------------|------------------|------|-----------|-----------------|----------------|------------------|----------------|------------------|----|
| 1  | 72.0444   | 36.5258         |                |                  |                |                  | A    |           |                 |                |                  |                |                  | 17 |
| 2  | 159.0764  | 80.0418         |                |                  | 141.0659       | 71.0366          | S    | 1712.7102 | 856.8587        | 1695.6836      | 848.3455         | 1694.6996      | 847.8535         | 16 |
| 3  | 256.1292  | 128.5682        |                |                  | 238.1186       | 119.5629         | P    | 1625.6782 | 813.3427        | 1608.6516      | 804.8294         | 1607.6676      | 804.3374         | 15 |
| 4  | 353.1819  | 177.0946        |                |                  | 335.1714       | 168.0893         | P    | 1528.6254 | 764.8163        | 1511.5989      | 756.3031         | 1510.6148      | 755.8111         | 14 |
| 5  | 440.2140  | 220.6106        |                |                  | 422.2034       | 211.6053         | S    | 1431.5726 | 716.2900        | 1414.5461      | 707.7767         | 1413.5621      | 707.2847         | 13 |
| 6  | 527.2460  | 264.1266        |                |                  | 509.2354       | 255.1214         | S    | 1344.5406 | 672.7739        | 1327.5141      | 664.2607         | 1326.5300      | 663.7687         | 12 |
| 7  | 614.2780  | 307.6427        |                |                  | 596.2675       | 298.6374         | S    | 1257.5086 | 629.2579        | 1240.4820      | 620.7447         | 1239.4980      | 620.2526         | 11 |
| 8  | 774.3087  | 387.6580        |                |                  | 756.2981       | 378.6527         | C    | 1170.4766 | 585.7419        | 1153.4500      | 577.2286         | 1152.4660      | 576.7366         | 10 |
| 9  | 889.3356  | 445.1714        | 872.3091       | 436.6582         | 871.3251       | 436.1662         | N    | 1010.4459 | 505.7266        | 993.4194       | 497.2133         | 992.4353       | 496.7213         | 9  |
| 10 | 1002.4197 | 501.7135        | 985.3931       | 493.2002         | 984.4091       | 492.7082         | I    | 895.4190  | 448.2131        | 878.3924       | 439.6998         | 877.4084       | 439.2078         | 8  |
| 11 | 1089.4517 | 545.2295        | 1072.4252      | 536.7162         | 1071.4411      | 536.2242         | S    | 782.3349  | 391.6711        | 765.3083       | 383.1578         | 764.3243       | 382.6658         | 7  |
| 12 | 1176.4837 | 588.7455        | 1159.4572      | 580.2322         | 1158.4732      | 579.7402         | S    | 695.3029  | 348.1551        | 678.2763       | 339.6418         | 677.2923       | 339.1498         | 6  |
| 13 | 1233.5052 | 617.2562        | 1216.4787      | 608.7430         | 1215.4946      | 608.2510         | G    | 608.2708  | 304.6391        | 591.2443       | 296.1258         | 590.2603       | 295.6338         | 5  |
| 14 | 1362.5478 | 681.7775        | 1345.5213      | 673.2643         | 1344.5372      | 672.7723         | E    | 551.2494  | 276.1283        | 534.2228       | 267.6151         | 533.2388       | 267.1230         | 4  |
| 15 | 1509.5832 | 755.2952        | 1492.5567      | 746.7820         | 1491.5726      | 746.2900         | M    | 422.2068  | 211.6070        | 405.1802       | 203.0938         |                |                  | 3  |
| 16 | 1637.6418 | 819.3245        | 1620.6152      | 810.8113         | 1619.6312      | 810.3192         | Q    | 275.1714  | 138.0893        | 258.1448       | 129.5761         |                |                  | 2  |
| 17 |           |                 |                |                  |                |                  | K    | 147.1128  | 74.0600         | 130.0863       | 65.5468          |                |                  | 1  |



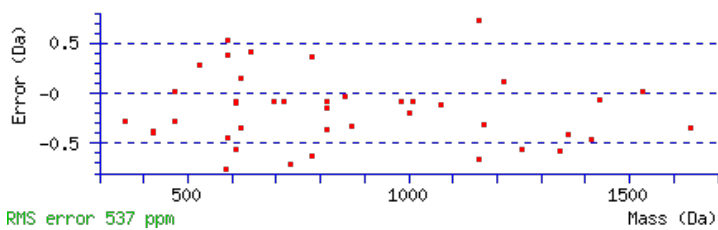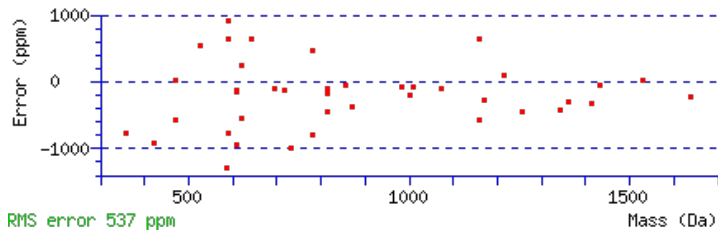

NCBI **BLAST** search of [ASPPSSSCNISSGEMQK](#)

(Parameters: blastp, nr protein database, expect=20000, no filter, PAM30)

Other BLAST [web gateways](#)

**All matches to this query**

| Score | Mr(calc)  | Delta   | Sequence                          | Site Analysis        |
|-------|-----------|---------|-----------------------------------|----------------------|
| 43.2  | 1782.7400 | 0.0064  | <a href="#">ASPPSSSCNISSGEMQK</a> | Deamidated N9 99.26% |
| 21.9  | 1782.7400 | 0.0064  | <a href="#">ASPPSSSCNISSGEMQK</a> | Deamidated Q16 0.74% |
| 3.6   | 1782.7449 | 0.0015  | <a href="#">NSGFFMEMMSMKPAK</a>   |                      |
| 0.1   | 1782.7518 | -0.0054 | <a href="#">ASPEYEENMHRYQK</a>    |                      |

Mascot: <http://www.matrixscience.com/>

# MASCOT SCIENCE Mascot Search Results

## Peptide View

MS/MS Fragmentation of **ASPPSSSCNISSGEMQK**

Found in **P04275** in **con\_Xuniprot\_HUMAN3**, VWF\_HUMAN von Willebrand factor OS=Homo sapiens GN=VWF PE=1 SV=4

Match to Query 9871: 1766.749228 from(884.381890,2+) intensity(1502.4076) rtinseconds(355) scans(545) index(28002)

Title: 111019\_Est\_MI\_YS\_G\_12Spectrum431\_scans\_\_545

Data file C:\\mascot\\20140703\_Tmgf\_1D\\CSV\_UseAnalysis\\MasterCSV\\All\_Glyco\\mgf\\ptm\\UC18ERLIC\_PTM\_35D.mgf

Click mouse within plot area to zoom in by factor of two about that point

Or, to Da

Label all possible matches Label matches used for scoring

Show Y-axis

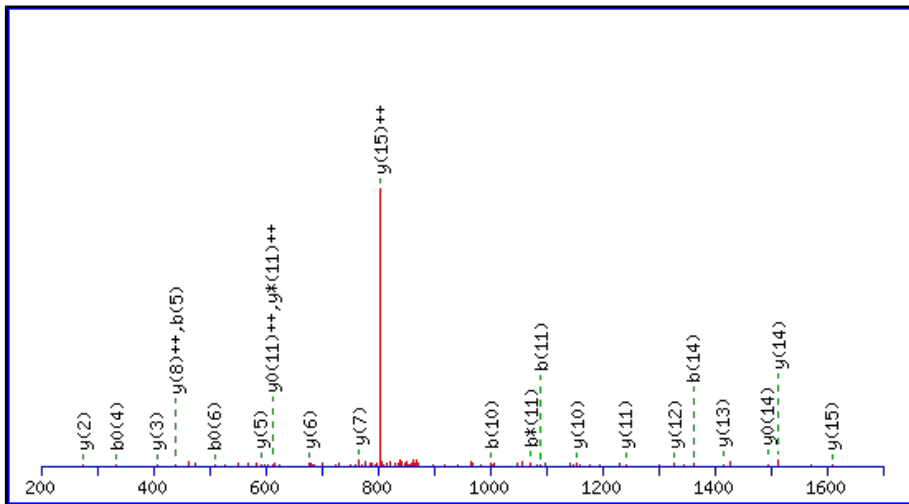

Monoisotopic mass of neutral peptide Mr(calc): 1766.7451

Fixed modifications: Carbamidomethyl (C) (apply to specified residues or termini only)

Variable modifications:

N9 : Deamidated (NQ)

Ions Score: 43 Expect: 0.0029

Matches : 23/168 fragment ions using 67 most intense peaks ([help](#))

| #  | b                | b <sup>++</sup> | b <sup>*</sup>   | b <sup>*++</sup> | b <sup>0</sup>  | b <sup>0++</sup> | Seq. | y                | y <sup>++</sup> | y <sup>*</sup> | y <sup>*++</sup> | y <sup>0</sup>   | y <sup>0++</sup> | #  |
|----|------------------|-----------------|------------------|------------------|-----------------|------------------|------|------------------|-----------------|----------------|------------------|------------------|------------------|----|
| 1  | 72.0444          | 36.5258         |                  |                  |                 |                  | A    |                  |                 |                |                  |                  |                  | 17 |
| 2  | 159.0764         | 80.0418         |                  |                  | 141.0659        | 71.0366          | S    | 1696.7153        | 848.8613        | 1679.6887      | 840.3480         | 1678.7047        | 839.8560         | 16 |
| 3  | 256.1292         | 128.5682        |                  |                  | 238.1186        | 119.5629         | P    | <b>1609.6832</b> | <b>805.3453</b> | 1592.6567      | 796.8320         | 1591.6727        | 796.3400         | 15 |
| 4  | 353.1819         | 177.0946        |                  |                  | <b>335.1714</b> | 168.0893         | P    | <b>1512.6305</b> | 756.8189        | 1495.6039      | 748.3056         | <b>1494.6199</b> | 747.8136         | 14 |
| 5  | <b>440.2140</b>  | 220.6106        |                  |                  | 422.2034        | 211.6053         | S    | <b>1415.5777</b> | 708.2925        | 1398.5512      | 699.7792         | 1397.5672        | 699.2872         | 13 |
| 6  | 527.2460         | 264.1266        |                  |                  | <b>509.2354</b> | 255.1214         | S    | <b>1328.5457</b> | 664.7765        | 1311.5191      | 656.2632         | 1310.5351        | 655.7712         | 12 |
| 7  | 614.2780         | 307.6427        |                  |                  | 596.2675        | 298.6374         | S    | <b>1241.5137</b> | 621.2605        | 1224.4871      | <b>612.7472</b>  | 1223.5031        | <b>612.2552</b>  | 11 |
| 8  | 774.3087         | 387.6580        |                  |                  | 756.2981        | 378.6527         | C    | <b>1154.4816</b> | 577.7445        | 1137.4551      | 569.2312         | 1136.4711        | 568.7392         | 10 |
| 9  | 889.3356         | 445.1714        | 872.3091         | 436.6582         | 871.3251        | 436.1662         | N    | 994.4510         | 497.7291        | 977.4244       | 489.2159         | 976.4404         | 488.7238         | 9  |
| 10 | <b>1002.4197</b> | 501.7135        | 985.3931         | 493.2002         | 984.4091        | 492.7082         | I    | 879.4240         | <b>440.2157</b> | 862.3975       | 431.7024         | 861.4135         | 431.2104         | 8  |
| 11 | <b>1089.4517</b> | 545.2295        | <b>1072.4252</b> | 536.7162         | 1071.4411       | 536.2242         | S    | <b>766.3400</b>  | 383.6736        | 749.3134       | 375.1604         | 748.3294         | 374.6683         | 7  |
| 12 | 1176.4837        | 588.7455        | 1159.4572        | 580.2322         | 1158.4732       | 579.7402         | S    | <b>679.3080</b>  | 340.1576        | 662.2814       | 331.6443         | 661.2974         | 331.1523         | 6  |
| 13 | 1233.5052        | 617.2562        | 1216.4787        | 608.7430         | 1215.4946       | 608.2510         | G    | <b>592.2759</b>  | 296.6416        | 575.2494       | 288.1283         | 574.2654         | 287.6363         | 5  |
| 14 | <b>1362.5478</b> | 681.7775        | 1345.5213        | 673.2643         | 1344.5372       | 672.7723         | E    | 535.2545         | 268.1309        | 518.2279       | 259.6176         | 517.2439         | 259.1256         | 4  |
| 15 | 1493.5883        | 747.2978        | 1476.5617        | 738.7845         | 1475.5777       | 738.2925         | M    | <b>406.2119</b>  | 203.6096        | 389.1853       | 195.0963         |                  |                  | 3  |
| 16 | 1621.6469        | 811.3271        | 1604.6203        | 802.8138         | 1603.6363       | 802.3218         | Q    | <b>275.1714</b>  | 138.0893        | 258.1448       | 129.5761         |                  |                  | 2  |
| 17 |                  |                 |                  |                  |                 |                  | K    | 147.1128         | 74.0600         | 130.0863       | 65.5468          |                  |                  | 1  |

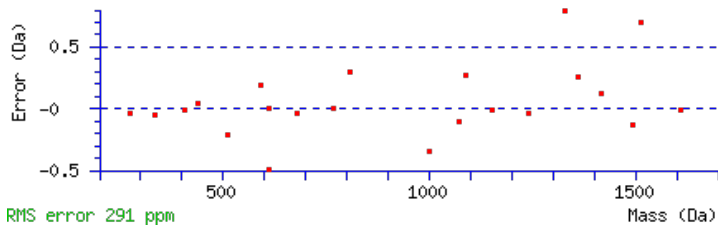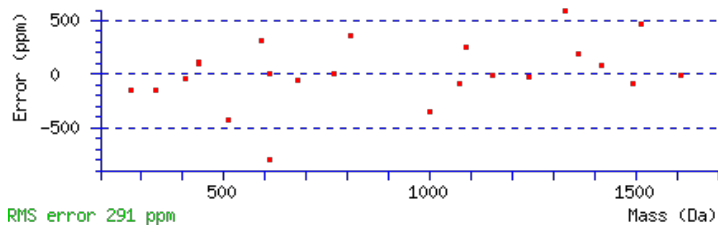

NCBI **BLAST** search of [ASPPSSSCNISSGEMQK](#)

(Parameters: blastp, nr protein database, expect=20000, no filter, PAM30)

Other BLAST [web gateways](#)

**All matches to this query**

| Score | Mr(calc)  | Delta  | Sequence                          | Site Analysis        |
|-------|-----------|--------|-----------------------------------|----------------------|
| 43.0  | 1766.7451 | 0.0041 | <a href="#">ASPPSSSCNISSGEMQK</a> | Deamidated N9 99.64% |
| 18.6  | 1766.7451 | 0.0041 | <a href="#">ASPPSSSCNISSGEMQK</a> | Deamidated Q16 0.36% |
| 3.3   | 1764.7438 | 2.0054 | <a href="#">ESWGQESNAGNQTIVR</a>  |                      |
| 3.0   | 1764.7447 | 2.0045 | <a href="#">RMEEFDKMVDYNR</a>     |                      |
| 2.8   | 1765.7433 | 1.0059 | <a href="#">MGELYRGAMTSSMER</a>   |                      |
| 2.5   | 1766.7442 | 0.0050 | <a href="#">RESETESPNSLESNTS</a>  |                      |
| 2.5   | 1766.7442 | 0.0050 | <a href="#">RESETESPNSLESNTS</a>  |                      |
| 2.5   | 1766.7464 | 0.0028 | <a href="#">RGIQMCSEENGGAWR</a>   |                      |
| 2.5   | 1766.7464 | 0.0028 | <a href="#">RGIQMCSEENGGAWR</a>   |                      |
| 1.9   | 1765.7453 | 1.0039 | <a href="#">RECWPAQWGPYCR</a>     |                      |

Mascot: <http://www.matrixscience.com/>

# MASCOT SCIENCE Mascot Search Results

## Peptide View

MS/MS Fragmentation of **HGVIISSVTDYENGSSVEYR**

Found in **P05160** in **con\_Xuniprot\_HUMAN3**, F13B\_HUMAN Coagulation factor XIII B chain OS=Homo sapiens GN=F13B PE=1 SV=3

Match to Query 15147: 2313.073362 from(772.031730,3+) intensity(25915.6582) rtinseconds(1157) scans(2720) index(25259)

Title: 111019\_Est\_MI\_YS\_G\_07Spectrum2299\_scans\_\_2720

Data file C:\mascot\20140703\_Tmgf\_1D\CSV\_UseAnalysis\MasterCSV\All\_Glyco\mgf\ptm\UC18ERLIC\_PTMs\_35D.mgf

Click mouse within plot area to zoom in by factor of two about that point

Or, to Da

Label all possible matches Label matches used for scoring

Show Y-axis

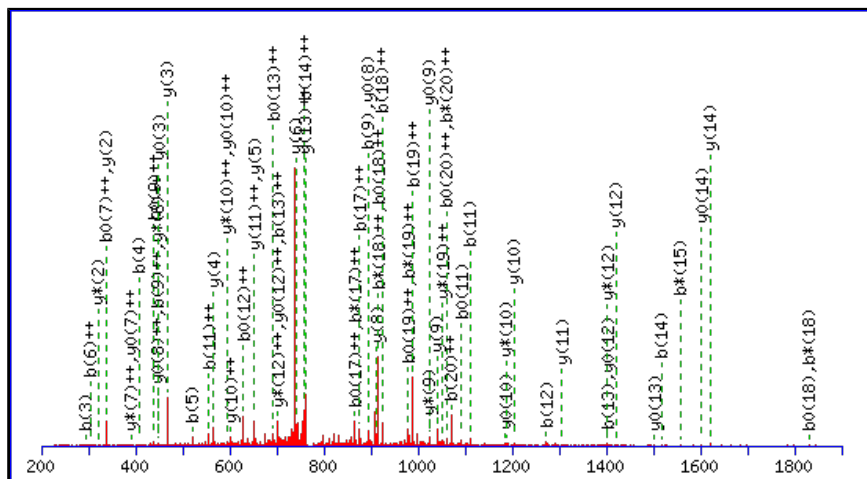

Monoisotopic mass of neutral peptide Mr(calc): 2313.0761

Fixed modifications: Carbamidomethyl (C) (apply to specified residues or termini only)

Variable modifications:

N14 : Deamidated (NQ)

Ions Score: 46 Expect: 0.0048

Matches : 67/200 fragment ions using 105 most intense peaks ([help](#))

| #  | b                | b <sup>++</sup>  | b <sup>*</sup>   | b <sup>*++</sup> | b <sup>0</sup>   | b <sup>0++</sup> | Seq.     | y                | y <sup>++</sup> | y <sup>*</sup>   | y <sup>*++</sup> | y <sup>0</sup>   | y <sup>0++</sup> | #         |
|----|------------------|------------------|------------------|------------------|------------------|------------------|----------|------------------|-----------------|------------------|------------------|------------------|------------------|-----------|
| 1  | 138.0662         | 69.5367          |                  |                  |                  |                  | <b>H</b> |                  |                 |                  |                  |                  |                  | <b>21</b> |
| 2  | 195.0877         | 98.0475          |                  |                  |                  |                  | <b>G</b> | 2177.0244        | 1089.0159       | 2159.9979        | 1080.5026        | 2159.0139        | 1080.0106        | <b>20</b> |
| 3  | <b>294.1561</b>  | 147.5817         |                  |                  |                  |                  | <b>V</b> | 2120.0030        | 1060.5051       | 2102.9764        | <b>1051.9919</b> | 2101.9924        | 1051.4998        | <b>19</b> |
| 4  | <b>407.2401</b>  | 204.1237         |                  |                  |                  |                  | <b>I</b> | 2020.9346        | 1010.9709       | 2003.9080        | 1002.4576        | 2002.9240        | 1001.9656        | <b>18</b> |
| 5  | <b>520.3242</b>  | 260.6657         |                  |                  |                  |                  | <b>I</b> | 1907.8505        | 954.4289        | 1890.8240        | 945.9156         | 1889.8399        | 945.4236         | <b>17</b> |
| 6  | 607.3562         | <b>304.1817</b>  |                  |                  | 589.3457         | 295.1765         | <b>S</b> | 1794.7664        | 897.8869        | 1777.7399        | 889.3736         | 1776.7559        | 888.8816         | <b>16</b> |
| 7  | 694.3882         | 347.6978         |                  |                  | 676.3777         | <b>338.6925</b>  | <b>S</b> | 1707.7344        | 854.3708        | 1690.7079        | 845.8576         | 1689.7239        | 845.3656         | <b>15</b> |
| 8  | 795.4359         | 398.2216         |                  |                  | 777.4254         | 389.2163         | <b>T</b> | <b>1620.7024</b> | 810.8548        | 1603.6758        | 802.3416         | <b>1602.6918</b> | 801.8495         | <b>14</b> |
| 9  | <b>894.5043</b>  | <b>447.7558</b>  |                  |                  | 876.4938         | <b>438.7505</b>  | <b>V</b> | 1519.6547        | <b>760.3310</b> | 1502.6282        | 751.8177         | <b>1501.6441</b> | 751.3257         | <b>13</b> |
| 10 | 1009.5313        | 505.2693         |                  |                  | 991.5207         | 496.2640         | <b>D</b> | <b>1420.5863</b> | 710.7968        | <b>1403.5597</b> | <b>702.2835</b>  | <b>1402.5757</b> | <b>701.7915</b>  | <b>12</b> |
| 11 | <b>1110.5790</b> | <b>555.7931</b>  |                  |                  | 1092.5684        | 546.7878         | <b>T</b> | <b>1305.5594</b> | <b>653.2833</b> | 1288.5328        | 644.7700         | 1287.5488        | 644.2780         | <b>11</b> |
| 12 | <b>1273.6423</b> | 637.3248         |                  |                  | 1255.6317        | <b>628.3195</b>  | <b>Y</b> | <b>1204.5117</b> | <b>602.7595</b> | <b>1187.4851</b> | <b>594.2462</b>  | <b>1186.5011</b> | <b>593.7542</b>  | <b>10</b> |
| 13 | <b>1402.6849</b> | <b>701.8461</b>  |                  |                  | 1384.6743        | <b>692.8408</b>  | <b>E</b> | <b>1041.4483</b> | 521.2278        | <b>1024.4218</b> | 512.7145         | <b>1023.4378</b> | 512.2225         | <b>9</b>  |
| 14 | <b>1517.7118</b> | <b>759.3596</b>  | 1500.6853        | 750.8463         | 1499.7013        | 750.3543         | <b>N</b> | <b>912.4058</b>  | 456.7065        | 895.3792         | <b>448.1932</b>  | <b>894.3952</b>  | <b>447.7012</b>  | <b>8</b>  |
| 15 | 1574.7333        | 787.8703         | <b>1557.7067</b> | 779.3570         | 1556.7227        | 778.8650         | <b>G</b> | 797.3788         | 399.1930        | 780.3523         | <b>390.6798</b>  | 779.3682         | <b>390.1878</b>  | <b>7</b>  |
| 16 | 1661.7653        | 831.3863         | 1644.7388        | 822.8730         | 1643.7548        | 822.3810         | <b>S</b> | <b>740.3573</b>  | 370.6823        | 723.3308         | 362.1690         | 722.3468         | 361.6770         | <b>6</b>  |
| 17 | 1748.7974        | <b>874.9023</b>  | 1731.7708        | <b>866.3890</b>  | 1730.7868        | <b>865.8970</b>  | <b>S</b> | <b>653.3253</b>  | 327.1663        | 636.2988         | 318.6530         | 635.3148         | 318.1610         | <b>5</b>  |
| 18 | 1847.8658        | <b>924.4365</b>  | <b>1830.8392</b> | <b>915.9232</b>  | <b>1829.8552</b> | <b>915.4312</b>  | <b>V</b> | <b>566.2933</b>  | 283.6503        | 549.2667         | 275.1370         | 548.2827         | 274.6450         | <b>4</b>  |
| 19 | 1976.9084        | <b>988.9578</b>  | 1959.8818        | <b>980.4445</b>  | 1958.8978        | <b>979.9525</b>  | <b>E</b> | <b>467.2249</b>  | 234.1161        | 450.1983         | 225.6028         | <b>449.2143</b>  | 225.1108         | <b>3</b>  |
| 20 | 2139.9717        | <b>1070.4895</b> | 2122.9451        | <b>1061.9762</b> | 2121.9611        | <b>1061.4842</b> | <b>Y</b> | <b>338.1823</b>  | 169.5948        | <b>321.1557</b>  | 161.0815         |                  |                  | <b>2</b>  |
| 21 |                  |                  |                  |                  |                  |                  | <b>R</b> | 175.1190         | 88.0631         | 158.0924         | 79.5498          |                  |                  | <b>1</b>  |

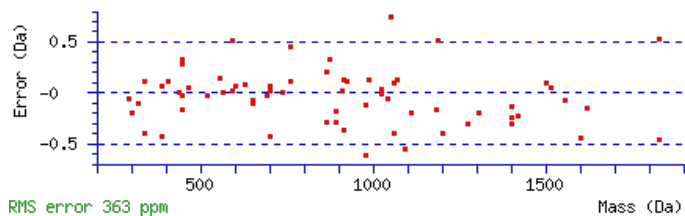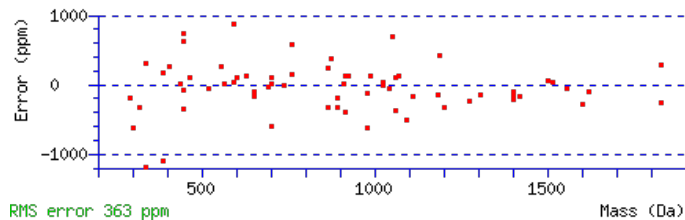

NCBI BLAST search of [HGVIISSTVDTYENGSSVEYR](#)

(Parameters: blastp, nr protein database, expect=20000, no filter, PAM30)

Other BLAST [web gateways](#)

**All matches to this query**

| Score | Mr(calc)  | Delta   | Sequence                              |
|-------|-----------|---------|---------------------------------------|
| 46.1  | 2313.0761 | -0.0027 | <a href="#">HGVIISSTVDTYENGSSVEYR</a> |
| 4.3   | 2312.0702 | 1.0031  | <a href="#">HLMKNNPGQAQQTGLATNTER</a> |
| 3.9   | 2312.0702 | 1.0031  | <a href="#">HLMKNNPGQAQQTGLATNTER</a> |
| 3.6   | 2312.0637 | 1.0096  | <a href="#">DSRMHQIQICEGNGIAPLVR</a>  |
| 3.6   | 2312.0637 | 1.0096  | <a href="#">DSRMHQIQICEGNGIAPLVR</a>  |
| 3.6   | 2312.0637 | 1.0096  | <a href="#">DSRMHQIQICEGNGIAPLVR</a>  |
| 3.6   | 2312.0637 | 1.0096  | <a href="#">DSRMHQIQICEGNGIAPLVR</a>  |
| 3.6   | 2312.0637 | 1.0096  | <a href="#">DSRMHQIQICEGNGIAPLVR</a>  |
| 3.6   | 2312.0637 | 1.0096  | <a href="#">DSRMHQIQICEGNGIAPLVR</a>  |
| 3.6   | 2312.0637 | 1.0096  | <a href="#">DSRMHQIQICEGNGIAPLVR</a>  |
| 3.5   | 2312.0685 | 1.0049  | <a href="#">NYHHLDNMYGFVVQEGFVK</a>   |

Mascot: <http://www.matrixscience.com/>

# MASCOT SCIENCE Mascot Search Results

## Peptide View

MS/MS Fragmentation of **LNPTVTYGNDSFSAK**

Found in **E7ESS4** in **con\_Xuniprot\_HUMAN3**, E7ESS4\_HUMAN Intercellular adhesion molecule 1 OS=Homo sapiens GN=ICAM1 PE=2 SV=1

Match to Query 7689: 1613.764428 from(807.889490,2+) intensity(44953.8711) rtinseconds(1058) scans(2473) index(26516)

Title: 111019\_Est\_MI\_YS\_G\_09Spectrum2121\_scans\_2473

Data file C:\mascot\20140703\_Tmgf\_1D\CSV\_UseAnalysis\MasterCSV\All\_Glyco\mgf\ptm\UC18ERLIC\_PTM\_35D.mgf

Click mouse within plot area to zoom in by factor of two about that point

Or, to Da

Label all possible matches Label matches used for scoring

Show Y-axis

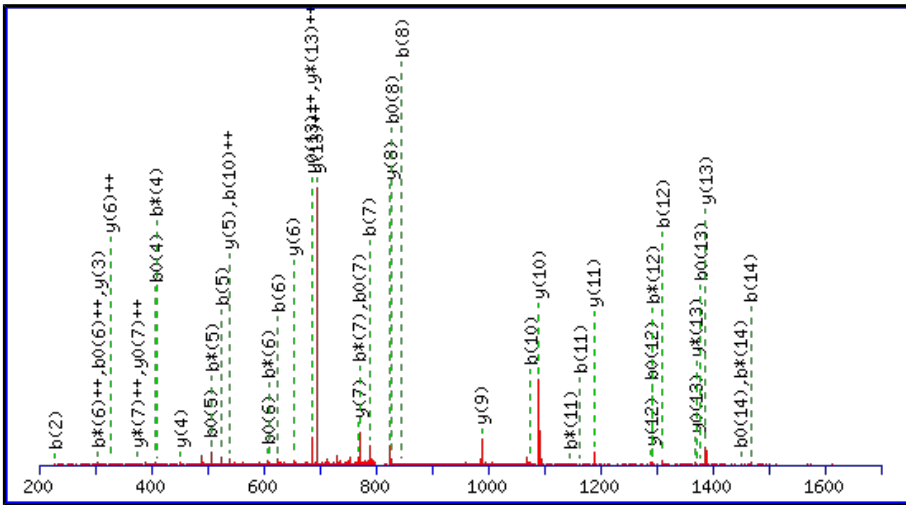

Monoisotopic mass of neutral peptide Mr(calc): 1613.7573

Fixed modifications: Carbamidomethyl (C) (apply to specified residues or termini only)

Variable modifications:

N9 : Deamidated (NQ)

Ions Score: 54 Expect: 0.0008

Matches : 46/156 fragment ions using 93 most intense peaks ([help](#))

| #  | b                | b <sup>++</sup> | b <sup>*</sup>   | b <sup>*++</sup> | b <sup>0</sup>   | b <sup>0++</sup> | Seq. | y                | y <sup>++</sup> | y <sup>*</sup>   | y <sup>*++</sup> | y <sup>0</sup>   | y <sup>0++</sup> | #  |
|----|------------------|-----------------|------------------|------------------|------------------|------------------|------|------------------|-----------------|------------------|------------------|------------------|------------------|----|
| 1  | 114.0913         | 57.5493         |                  |                  |                  |                  | L    |                  |                 |                  |                  |                  |                  | 15 |
| 2  | <b>228.1343</b>  | 114.5708        | 211.1077         | 106.0575         |                  |                  | N    | 1501.6805        | 751.3439        | 1484.6540        | 742.8306         | 1483.6700        | 742.3386         | 14 |
| 3  | 325.1870         | 163.0972        | 308.1605         | 154.5839         |                  |                  | P    | <b>1387.6376</b> | <b>694.3224</b> | <b>1370.6111</b> | <b>685.8092</b>  | <b>1369.6270</b> | <b>685.3172</b>  | 13 |
| 4  | 426.2347         | 213.6210        | <b>409.2082</b>  | 205.1077         | <b>408.2241</b>  | 204.6157         | T    | <b>1290.5848</b> | 645.7961        | 1273.5583        | 637.2828         | 1272.5743        | 636.7908         | 12 |
| 5  | <b>525.3031</b>  | 263.1552        | <b>508.2766</b>  | 254.6419         | <b>507.2926</b>  | 254.1499         | V    | <b>1189.5372</b> | 595.2722        | 1172.5106        | 586.7589         | 1171.5266        | 586.2669         | 11 |
| 6  | <b>626.3508</b>  | 313.6790        | <b>609.3243</b>  | <b>305.1658</b>  | <b>608.3402</b>  | <b>304.6738</b>  | T    | <b>1090.4687</b> | 545.7380        | 1073.4422        | 537.2247         | 1072.4582        | 536.7327         | 10 |
| 7  | <b>789.4141</b>  | 395.2107        | <b>772.3876</b>  | 386.6974         | <b>771.4036</b>  | 386.2054         | Y    | <b>989.4211</b>  | 495.2142        | 972.3945         | 486.7009         | 971.4105         | 486.2089         | 9  |
| 8  | <b>846.4356</b>  | 423.7214        | 829.4090         | 415.2082         | <b>828.4250</b>  | 414.7162         | G    | <b>826.3577</b>  | 413.6825        | 809.3312         | 405.1692         | 808.3472         | 404.6772         | 8  |
| 9  | 961.4625         | 481.2349        | 944.4360         | 472.7216         | 943.4520         | 472.2296         | N    | <b>769.3363</b>  | 385.1718        | 752.3097         | <b>376.6585</b>  | 751.3257         | <b>376.1665</b>  | 7  |
| 10 | <b>1076.4895</b> | <b>538.7484</b> | 1059.4629        | 530.2351         | 1058.4789        | 529.7431         | D    | <b>654.3093</b>  | <b>327.6583</b> | 637.2828         | 319.1450         | 636.2988         | 318.6530         | 6  |
| 11 | <b>1163.5215</b> | 582.2644        | <b>1146.4950</b> | 573.7511         | 1145.5109        | 573.2591         | S    | <b>539.2824</b>  | 270.1448        | 522.2558         | 261.6316         | 521.2718         | 261.1395         | 5  |
| 12 | <b>1310.5899</b> | 655.7986        | <b>1293.5634</b> | 647.2853         | <b>1292.5794</b> | 646.7933         | F    | <b>452.2504</b>  | 226.6288        | 435.2238         | 218.1155         | 434.2398         | 217.6235         | 4  |
| 13 | 1397.6220        | 699.3146        | 1380.5954        | 690.8013         | <b>1379.6114</b> | 690.3093         | S    | <b>305.1819</b>  | 153.0946        | 288.1554         | 144.5813         | 287.1714         | 144.0893         | 3  |
| 14 | <b>1468.6591</b> | 734.8332        | <b>1451.6325</b> | 726.3199         | <b>1450.6485</b> | 725.8279         | A    | 218.1499         | 109.5786        | 201.1234         | 101.0653         |                  |                  | 2  |
| 15 |                  |                 |                  |                  |                  |                  | K    | 147.1128         | 74.0600         | 130.0863         | 65.5468          |                  |                  | 1  |

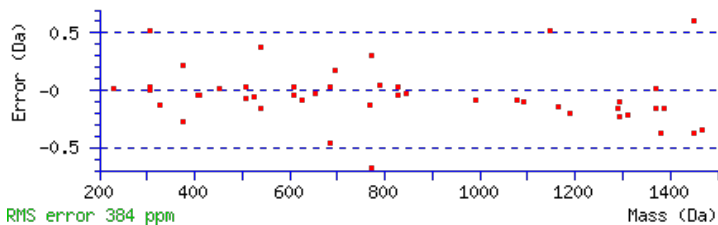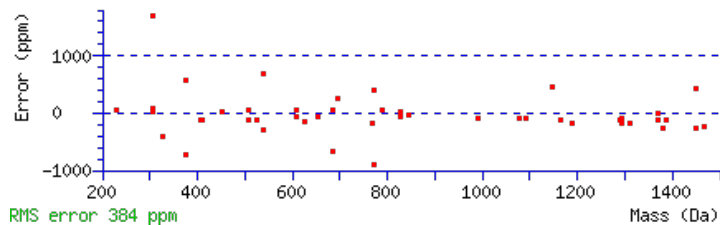

NCBI BLAST search of [LNPTVTYGNDSFSAK](#)

(Parameters: blastp, nr protein database, expect=20000, no filter, PAM30)

Other BLAST [web gateways](#)

All matches to this query

| Score | Mr(calc)  | Delta   | Sequence                        | Site Analysis        |
|-------|-----------|---------|---------------------------------|----------------------|
| 53.7  | 1613.7573 | 0.0071  | <a href="#">LNPTVTYGNDSFSAK</a> | Deamidated N9 99.97% |
| 18.8  | 1613.7573 | 0.0071  | <a href="#">LNPTVTYGNDSFSAK</a> | Deamidated N2 0.03%  |
| 7.5   | 1613.7694 | -0.0050 | <a href="#">LVNFPMDGHACPLK</a>  |                      |
| 6.0   | 1612.7562 | 1.0082  | <a href="#">NYPATFWVNPQEK</a>   |                      |
| 5.3   | 1612.7654 | 0.9990  | <a href="#">LLNYETIIMNESR</a>   |                      |
| 2.9   | 1613.7719 | -0.0074 | <a href="#">HQQNSPMLKLNSAK</a>  |                      |
| 2.9   | 1613.7719 | -0.0074 | <a href="#">HQQNSPMLKLNSAK</a>  |                      |
| 2.9   | 1613.7719 | -0.0074 | <a href="#">HQQNSPMLKLNSAK</a>  |                      |
| 2.9   | 1613.7719 | -0.0074 | <a href="#">HQQNSPMLKLNSAK</a>  |                      |
| 2.9   | 1613.7579 | 0.0065  | <a href="#">RHDRENEEMIASK</a>   |                      |

Mascot: <http://www.matrixscience.com/>



# MASCOT SCIENCE Mascot Search Results

## Peptide View

MS/MS Fragmentation of **ANLTVVLLR**

Found in **K7EKL8** in **con\_Xuniprot\_HUMAN3**, K7EKL8\_HUMAN Intercellular adhesion molecule 1 (Fragment) OS=Homo sapiens GN=ICAM1 PE=2 SV=1

Match to Query 155: 998.615468 from(500.315010,2+) intensity(31896.3340) rtinseconds(1625) scans(4020) index(10963)

Title: 111019\_Est\_ISCardio\_NMI\_YS\_G\_7Spectrum3388\_scans\_\_4020

Data file C:\mascot\20140703\_Tmgf\_1D\CSV\_UseAnalysis\MasterCSV\All\_Glyco\mgf\ptm\UC18ERLIC\_PTM\_35D.mgf

Click mouse within plot area to zoom in by factor of two about that point

Or, to Da

Label all possible matches Label matches used for scoring

Show Y-axis

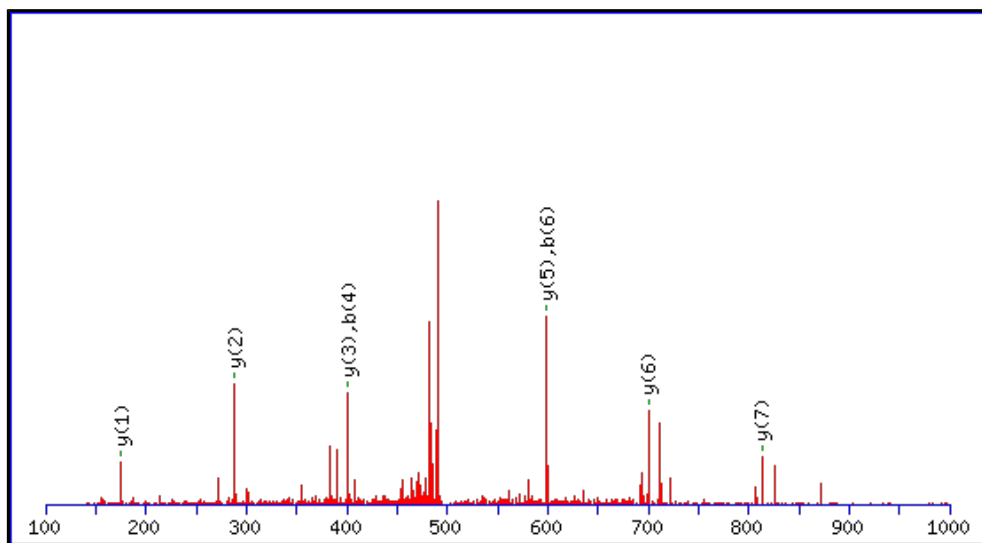

Monoisotopic mass of neutral peptide  $M_r(\text{calc})$ : 998.6124

Fixed modifications: Carbamidomethyl (C) (apply to specified residues or termini only)

Variable modifications:

N2 : Deamidated (NQ)

Ions Score: 54 Expect: 0.0003

Matches : 8/78 fragment ions using 9 most intense peaks ([help](#))

| # | b               | b <sup>++</sup> | b*       | b <sup>***</sup> | b <sup>0</sup> | b <sup>0++</sup> | Seq. | y               | y <sup>++</sup> | y*       | y <sup>***</sup> | y <sup>0</sup> | y <sup>0++</sup> | # |
|---|-----------------|-----------------|----------|------------------|----------------|------------------|------|-----------------|-----------------|----------|------------------|----------------|------------------|---|
| 1 | 72.0444         | 36.5258         |          |                  |                |                  | A    |                 |                 |          |                  |                |                  | 9 |
| 2 | 187.0713        | 94.0393         | 170.0448 | 85.5260          |                |                  | N    | 928.5826        | 464.7949        | 911.5560 | 456.2817         | 910.5720       | 455.7897         | 8 |
| 3 | 300.1554        | 150.5813        | 283.1288 | 142.0681         |                |                  | L    | <b>813.5557</b> | 407.2815        | 796.5291 | 398.7682         | 795.5451       | 398.2762         | 7 |
| 4 | <b>401.2031</b> | 201.1052        | 384.1765 | 192.5919         | 383.1925       | 192.0999         | T    | <b>700.4716</b> | 350.7394        | 683.4450 | 342.2262         | 682.4610       | 341.7341         | 6 |
| 5 | 500.2715        | 250.6394        | 483.2449 | 242.1261         | 482.2609       | 241.6341         | V    | <b>599.4239</b> | 300.2156        | 582.3974 | 291.7023         |                |                  | 5 |
| 6 | <b>599.3399</b> | 300.1736        | 582.3134 | 291.6603         | 581.3293       | 291.1683         | V    | 500.3555        | 250.6814        | 483.3289 | 242.1681         |                |                  | 4 |
| 7 | 712.4240        | 356.7156        | 695.3974 | 348.2023         | 694.4134       | 347.7103         | L    | <b>401.2871</b> | 201.1472        | 384.2605 | 192.6339         |                |                  | 3 |
| 8 | 825.5080        | 413.2577        | 808.4815 | 404.7444         | 807.4975       | 404.2524         | L    | <b>288.2030</b> | 144.6051        | 271.1765 | 136.0919         |                |                  | 2 |
| 9 |                 |                 |          |                  |                |                  | R    | <b>175.1190</b> | 88.0631         | 158.0924 | 79.5498          |                |                  | 1 |

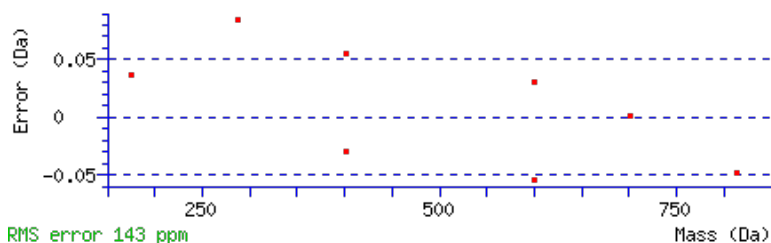

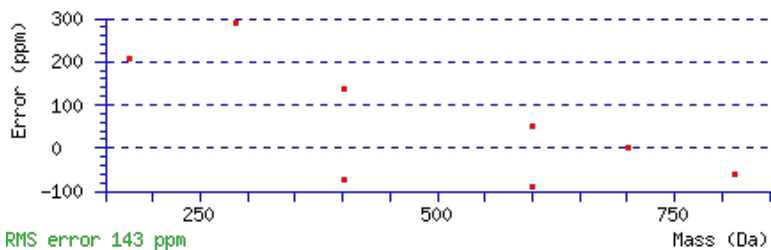

NCBI **BLAST** search of [ANLTVVLLR](#)

(Parameters: blastp, nr protein database, expect=20000, no filter, PAM30)

Other BLAST [web gateways](#)

**All matches to this query**

| Score | Mr(calc) | Delta  | Sequence                  |
|-------|----------|--------|---------------------------|
| 53.5  | 998.6124 | 0.0031 | <a href="#">ANLTVVLLR</a> |
| 32.9  | 998.6124 | 0.0031 | <a href="#">SSLLPITLR</a> |
| 23.4  | 998.6124 | 0.0031 | <a href="#">KEEVLILR</a>  |
| 23.3  | 996.6080 | 2.0075 | <a href="#">RLETPILR</a>  |
| 22.7  | 997.6073 | 1.0082 | <a href="#">QLGIWLLR</a>  |
| 15.5  | 998.6124 | 0.0031 | <a href="#">DQLIKILR</a>  |
| 13.6  | 998.6124 | 0.0031 | <a href="#">ALIEATLLR</a> |
| 13.6  | 998.6124 | 0.0031 | <a href="#">EKILDIIR</a>  |
| 13.6  | 998.6124 | 0.0031 | <a href="#">EKLVEILR</a>  |
| 13.6  | 998.6124 | 0.0031 | <a href="#">IDLKELLR</a>  |

**Mascot:** <http://www.matrixscience.com/>

# MATRIX SCIENCE Mascot Search Results

## Peptide View

MS/MS Fragmentation of **TLYETEVEFSTDFSNISAAK**

Found in **P05543** in **con\_Xuniprot\_HUMAN3**, THBG\_HUMAN Thyroxine-binding globulin OS=Homo sapiens GN=SERPINA7 PE=1 SV=2

Match to Query 13913: 2123.004928 from(1062.509740,2+) intensity(11014.7676) rtinseconds(2042) scans(5122) index(12778)

Title: 111019\_Est\_ISCardio\_NMI\_YS\_G\_9Spectrum4485\_scans\_5122

Data file C:\mascot\20140703\_Tmgf\_1D\CSV\_UseAnalysis\MasterCSV\All\_Glyco\mgf\ptm\UC18ERLIC\_PTM\_35D.mgf

Click mouse within plot area to zoom in by factor of two about that point

Or, to Da

Label all possible matches Label matches used for scoring

Show Y-axis

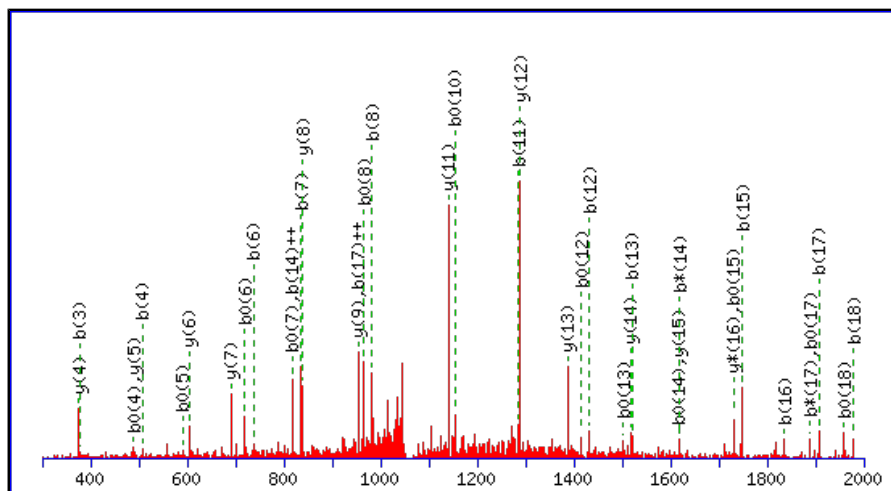

Monoisotopic mass of neutral peptide Mr(calc): 2122.9946

Fixed modifications: Carbamidomethyl (C) (apply to specified residues or termini only)

Variable modifications:

N14 : Deamidated (NQ)

Ions Score: 96 Expect: 6.1e-008

Matches : 40/184 fragment ions using 51 most intense peaks (help)

| #  | b                | b <sup>++</sup> | b <sup>*</sup>   | b <sup>*++</sup> | b <sup>0</sup>   | b <sup>0++</sup> | Seq. | y                | y <sup>++</sup> | y <sup>*</sup>   | y <sup>*++</sup> | y <sup>0</sup> | y <sup>0++</sup> | #  |
|----|------------------|-----------------|------------------|------------------|------------------|------------------|------|------------------|-----------------|------------------|------------------|----------------|------------------|----|
| 1  | 102.0550         | 51.5311         |                  |                  | 84.0444          | 42.5258          | T    |                  |                 |                  |                  |                |                  | 19 |
| 2  | 215.1390         | 108.0731        |                  |                  | 197.1285         | 99.0679          | L    | 2022.9542        | 1011.9808       | 2005.9277        | 1003.4675        | 2004.9437      | 1002.9755        | 18 |
| 3  | <b>378.2023</b>  | 189.6048        |                  |                  | 360.1918         | 180.5995         | Y    | 1909.8702        | 955.4387        | 1892.8436        | 946.9255         | 1891.8596      | 946.4334         | 17 |
| 4  | <b>507.2449</b>  | 254.1261        |                  |                  | <b>489.2344</b>  | 245.1208         | E    | 1746.8069        | 873.9071        | <b>1729.7803</b> | 865.3938         | 1728.7963      | 864.9018         | 16 |
| 5  | 608.2926         | 304.6499        |                  |                  | <b>590.2821</b>  | 295.6447         | T    | <b>1617.7643</b> | 809.3858        | 1600.7377        | 800.8725         | 1599.7537      | 800.3805         | 15 |
| 6  | <b>737.3352</b>  | 369.1712        |                  |                  | <b>719.3246</b>  | 360.1660         | E    | <b>1516.7166</b> | 758.8619        | 1499.6900        | 750.3487         | 1498.7060      | 749.8566         | 14 |
| 7  | <b>836.4036</b>  | 418.7055        |                  |                  | <b>818.3931</b>  | 409.7002         | V    | <b>1387.6740</b> | 694.3406        | 1370.6474        | 685.8274         | 1369.6634      | 685.3353         | 13 |
| 8  | <b>983.4720</b>  | 492.2397        |                  |                  | <b>965.4615</b>  | 483.2344         | F    | <b>1288.6056</b> | 644.8064        | 1271.5790        | 636.2932         | 1270.5950      | 635.8011         | 12 |
| 9  | 1070.5041        | 535.7557        |                  |                  | 1052.4935        | 526.7504         | S    | <b>1141.5372</b> | 571.2722        | 1124.5106        | 562.7589         | 1123.5266      | 562.2669         | 11 |
| 10 | 1171.5517        | 586.2795        |                  |                  | <b>1153.5412</b> | 577.2742         | T    | 1054.5051        | 527.7562        | 1037.4786        | 519.2429         | 1036.4946      | 518.7509         | 10 |
| 11 | <b>1286.5787</b> | 643.7930        |                  |                  | 1268.5681        | 634.7877         | D    | <b>953.4575</b>  | 477.2324        | 936.4309         | 468.7191         | 935.4469       | 468.2271         | 9  |
| 12 | <b>1433.6471</b> | 717.3272        |                  |                  | <b>1415.6365</b> | 708.3219         | F    | <b>838.4305</b>  | 419.7189        | 821.4040         | 411.2056         | 820.4199       | 410.7136         | 8  |
| 13 | <b>1520.6791</b> | 760.8432        |                  |                  | <b>1502.6686</b> | 751.8379         | S    | <b>691.3621</b>  | 346.1847        | 674.3355         | 337.6714         | 673.3515       | 337.1794         | 7  |
| 14 | 1635.7061        | <b>818.3567</b> | <b>1618.6795</b> | 809.8434         | <b>1617.6955</b> | 809.3514         | N    | <b>604.3301</b>  | 302.6687        | 587.3035         | 294.1554         | 586.3195       | 293.6634         | 6  |
| 15 | <b>1748.7901</b> | 874.8987        | 1731.7636        | 866.3854         | <b>1730.7796</b> | 865.8934         | I    | <b>489.3031</b>  | 245.1552        | 472.2766         | 236.6419         | 471.2926       | 236.1499         | 5  |
| 16 | <b>1835.8222</b> | 918.4147        | 1818.7956        | 909.9014         | 1817.8116        | 909.4094         | S    | <b>376.2191</b>  | 188.6132        | 359.1925         | 180.0999         | 358.2085       | 179.6079         | 4  |
| 17 | <b>1906.8593</b> | <b>953.9333</b> | <b>1889.8327</b> | 945.4200         | <b>1888.8487</b> | 944.9280         | A    | 289.1870         | 145.0972        | 272.1605         | 136.5839         |                |                  | 3  |
| 18 | <b>1977.8964</b> | 989.4518        | 1960.8698        | 980.9386         | <b>1959.8858</b> | 980.4466         | A    | 218.1499         | 109.5786        | 201.1234         | 101.0653         |                |                  | 2  |
| 19 |                  |                 |                  |                  |                  |                  | K    | 147.1128         | 74.0600         | 130.0863         | 65.5468          |                |                  | 1  |

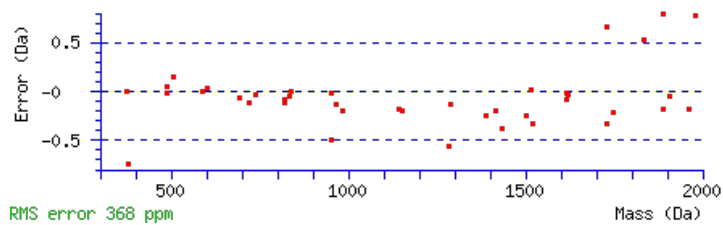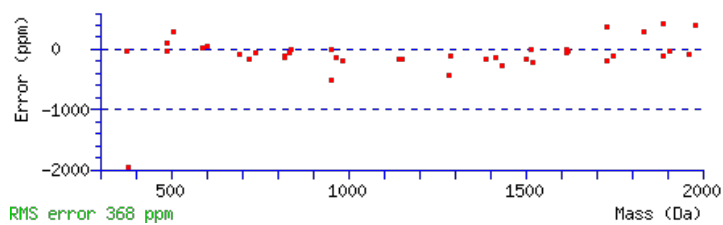

NCBI BLAST search of [TLYETEVEFSTDFSNISAAK](#)

(Parameters: blastp, nr protein database, expect=20000, no filter, PAM30)

Other BLAST [web gateways](#)

All matches to this query

| Score | Mr(calcd) | Delta  | Sequence                             |
|-------|-----------|--------|--------------------------------------|
| 95.9  | 2122.9946 | 0.0103 | <a href="#">TLYETEVEFSTDFSNISAAK</a> |
| 49.4  | 2122.0106 | 0.9943 | <a href="#">TLYETEVEFSTDFSNISAAK</a> |
| 4.1   | 2122.0040 | 1.0009 | <a href="#">IMNEHLYKQAWHEADKTK</a>   |
| 2.9   | 2122.9986 | 0.0063 | <a href="#">LVMENREGLNMNLSNSAK</a>   |

Mascot: <http://www.matrixscience.com/>

# MATRIX SCIENCE Mascot Search Results

## Peptide View

MS/MS Fragmentation of **VTACHSSQP NATLYK**

Found in **P05543** in **con\_Xuniprot\_HUMAN3**, THBG\_HUMAN Thyroxine-binding globulin OS=Homo sapiens GN=SERPINA7 PE=1 SV=2

Match to Query 8441: 1676.786308 from(839.400430,2+) intensity(5980.4795) rtinseconds(345) scans(584) index(9262)

Title: 111019\_Est\_ISCardio\_NMI\_YS\_G\_5Spectrum468\_scans\_584

Data file C:\mascot\20140703\_Tmgf\_1D\CSV\_UseAnalysis\MasterCSV\All\_Glyco\mgf\ptm\UC18ERLIC\_PTM\_35D.mgf

Click mouse within plot area to zoom in by factor of two about that point

Or, to Da

Label all possible matches Label matches used for scoring

Show Y-axis

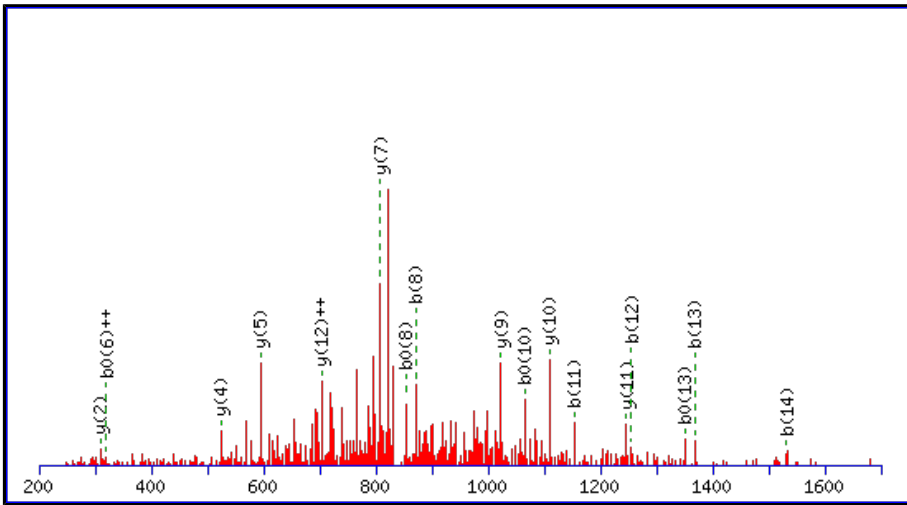

Monoisotopic mass of neutral peptide Mr(calc): 1676.7828

Fixed modifications: Carbamidomethyl (C) (apply to specified residues or termini only)

Variable modifications:

N10 : Deamidated (NQ)

Ions Score: 40 Expect: 0.018

Matches : 17/146 fragment ions using 28 most intense peaks ([help](#))

| #  | b         | b <sup>++</sup> | b <sup>*</sup> | b <sup>***</sup> | b <sup>0</sup> | b <sup>0++</sup> | Seq. | y         | y <sup>++</sup> | y <sup>*</sup> | y <sup>***</sup> | y <sup>0</sup> | y <sup>0++</sup> | #  |
|----|-----------|-----------------|----------------|------------------|----------------|------------------|------|-----------|-----------------|----------------|------------------|----------------|------------------|----|
| 1  | 100.0757  | 50.5415         |                |                  |                |                  | V    |           |                 |                |                  |                |                  | 15 |
| 2  | 201.1234  | 101.0653        |                |                  | 183.1128       | 92.0600          | T    | 1578.7217 | 789.8645        | 1561.6951      | 781.3512         | 1560.7111      | 780.8592         | 14 |
| 3  | 272.1605  | 136.5839        |                |                  | 254.1499       | 127.5786         | A    | 1477.6740 | 739.3406        | 1460.6475      | 730.8274         | 1459.6634      | 730.3354         | 13 |
| 4  | 432.1911  | 216.5992        |                |                  | 414.1806       | 207.5939         | C    | 1406.6369 | 703.8221        | 1389.6103      | 695.3088         | 1388.6263      | 694.8168         | 12 |
| 5  | 569.2500  | 285.1287        |                |                  | 551.2395       | 276.1234         | H    | 1246.6062 | 623.8068        | 1229.5797      | 615.2935         | 1228.5957      | 614.8015         | 11 |
| 6  | 656.2821  | 328.6447        |                |                  | 638.2715       | 319.6394         | S    | 1109.5473 | 555.2773        | 1092.5208      | 546.7640         | 1091.5368      | 546.2720         | 10 |
| 7  | 743.3141  | 372.1607        |                |                  | 725.3035       | 363.1554         | S    | 1022.5153 | 511.7613        | 1005.4888      | 503.2480         | 1004.5047      | 502.7560         | 9  |
| 8  | 871.3727  | 436.1900        | 854.3461       | 427.6767         | 853.3621       | 427.1847         | Q    | 935.4833  | 468.2453        | 918.4567       | 459.7320         | 917.4727       | 459.2400         | 8  |
| 9  | 968.4254  | 484.7164        | 951.3989       | 476.2031         | 950.4149       | 475.7111         | P    | 807.4247  | 404.2160        | 790.3981       | 395.7027         | 789.4141       | 395.2107         | 7  |
| 10 | 1083.4524 | 542.2298        | 1066.4258      | 533.7166         | 1065.4418      | 533.2245         | N    | 710.3719  | 355.6896        | 693.3454       | 347.1763         | 692.3614       | 346.6843         | 6  |
| 11 | 1154.4895 | 577.7484        | 1137.4630      | 569.2351         | 1136.4789      | 568.7431         | A    | 595.3450  | 298.1761        | 578.3184       | 289.6629         | 577.3344       | 289.1709         | 5  |
| 12 | 1255.5372 | 628.2722        | 1238.5106      | 619.7590         | 1237.5266      | 619.2669         | T    | 524.3079  | 262.6576        | 507.2813       | 254.1443         | 506.2973       | 253.6523         | 4  |
| 13 | 1368.6212 | 684.8143        | 1351.5947      | 676.3010         | 1350.6107      | 675.8090         | L    | 423.2602  | 212.1337        | 406.2336       | 203.6205         |                |                  | 3  |
| 14 | 1531.6846 | 766.3459        | 1514.6580      | 757.8326         | 1513.6740      | 757.3406         | Y    | 310.1761  | 155.5917        | 293.1496       | 147.0784         |                |                  | 2  |
| 15 |           |                 |                |                  |                |                  | K    | 147.1128  | 74.0600         | 130.0863       | 65.5468          |                |                  | 1  |

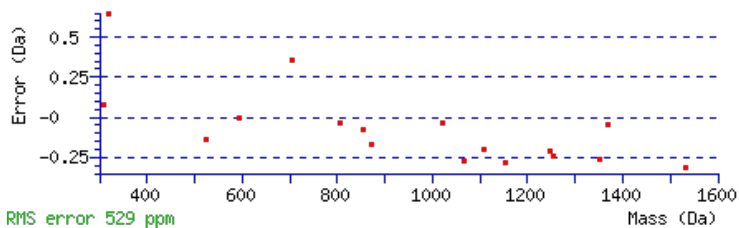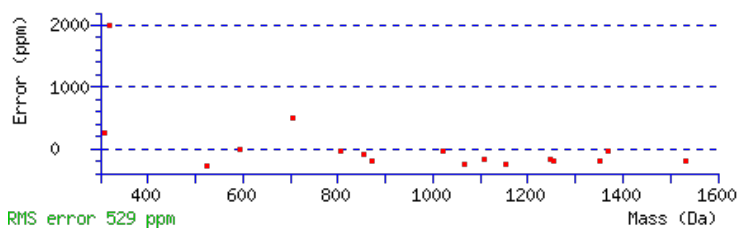

NCBI BLAST search of [VTACHSSQP NATLYK](#)

(Parameters: blastp, nr protein database, expect=20000, no filter, PAM30)

Other BLAST [web gateways](#)

**All matches to this query**

| Score | Mr(calc)  | Delta   | Sequence                          | Site Analysis         |
|-------|-----------|---------|-----------------------------------|-----------------------|
| 40.2  | 1676.7828 | 0.0035  | <a href="#">VTACHSSQP NATLYK</a>  | Deamidated N10 93.46% |
| 28.7  | 1676.7828 | 0.0035  | <a href="#">VTACHSSQP NATLYK</a>  | Deamidated Q8 6.54%   |
| 3.2   | 1676.7893 | -0.0030 | <a href="#">GPFEDGEQGGSNQKLLK</a> |                       |
| 1.4   | 1676.7893 | -0.0030 | <a href="#">DQINPDARNDLLYK</a>    |                       |
| 1.2   | 1676.7868 | -0.0005 | <a href="#">EYKDAFMKANPGYK</a>    |                       |
| 1.0   | 1675.7763 | 1.0100  | <a href="#">YGEKIETKCQOYK</a>     |                       |

Mascot: <http://www.matrixscience.com/>

# MASCOT SCIENCE Mascot Search Results

## Peptide View

MS/MS Fragmentation of **GGETAQSADPQWEQLNKNLSMPLLPADPHK**

Found in **P05546** in **con\_Xuniprot\_HUMAN3**, HEP2\_HUMAN Heparin cofactor 2 OS=Homo sapiens GN=SERPIND1 PE=1 SV=3

Match to Query 27729: 3436.652022 from(1146.557950,3+) intensity(27008.2930) rtinseconds(1937) scans(4914) index(11083)

Title: 111019\_Est\_ISCardio\_NMI\_YS\_G\_7Spectrum4171\_scans\_4914

Data file C:\mascot\20140703\_Tmgf\_1D\CSV\_UseAnalysis\MasterCSV\All\_Glyco\mgf\ptm\UC18ERLIC\_PTM\_35D.mgf

Click mouse within plot area to zoom in by factor of two about that point

Or, to Da

Label all possible matches Label matches used for scoring

Show Y-axis

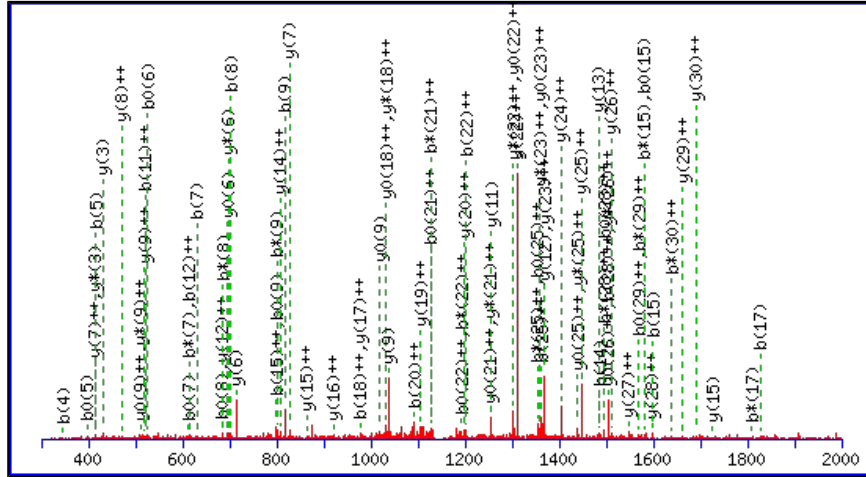

Monoisotopic mass of neutral peptide Mr(calc): 3436.6357

Fixed modifications: Carbamidomethyl (C) (apply to specified residues or termini only)

Variable modifications:

N19 : Deamidated (NQ)

Ions Score: 73 Expect: 1.3e-005

Matches : 83/340 fragment ions using 170 most intense peaks ([help](#))

| #  | b         | b <sup>++</sup> | b <sup>*</sup> | b <sup>*++</sup> | b <sup>0</sup> | b <sup>0++</sup> | Seq. | y         | y <sup>++</sup> | y <sup>*</sup> | y <sup>*++</sup> | y <sup>0</sup> | y <sup>0++</sup> | #  |
|----|-----------|-----------------|----------------|------------------|----------------|------------------|------|-----------|-----------------|----------------|------------------|----------------|------------------|----|
| 1  | 58.0287   | 29.5180         |                |                  |                |                  | G    |           |                 |                |                  |                |                  | 31 |
| 2  | 115.0502  | 58.0287         |                |                  |                |                  | G    | 3380.6216 | 1690.8144       | 3363.5950      | 1682.3012        | 3362.6110      | 1681.8091        | 30 |
| 3  | 244.0928  | 122.5500        |                |                  | 226.0822       | 113.5448         | E    | 3323.6001 | 1662.3037       | 3306.5736      | 1653.7904        | 3305.5896      | 1653.2984        | 29 |
| 4  | 345.1405  | 173.0739        |                |                  | 327.1299       | 164.0686         | T    | 3194.5575 | 1597.7824       | 3177.5310      | 1589.2691        | 3176.5470      | 1588.7771        | 28 |
| 5  | 416.1776  | 208.5924        |                |                  | 398.1670       | 199.5872         | A    | 3093.5098 | 1547.2586       | 3076.4833      | 1538.7453        | 3075.4993      | 1538.2533        | 27 |
| 6  | 544.2362  | 272.6217        | 527.2096       | 264.1084         | 526.2256       | 263.6164         | Q    | 3022.4727 | 1511.7400       | 3005.4462      | 1503.2267        | 3004.4622      | 1502.7347        | 26 |
| 7  | 631.2682  | 316.1377        | 614.2416       | 307.6245         | 613.2576       | 307.1325         | S    | 2894.4142 | 1447.7107       | 2877.3876      | 1439.1974        | 2876.4036      | 1438.7054        | 25 |
| 8  | 702.3053  | 351.6563        | 685.2788       | 343.1430         | 684.2947       | 342.6510         | A    | 2807.3821 | 1404.1947       | 2790.3556      | 1395.6814        | 2789.3716      | 1395.1894        | 24 |
| 9  | 817.3323  | 409.1698        | 800.3057       | 400.6565         | 799.3217       | 400.1645         | D    | 2736.3450 | 1368.6761       | 2719.3185      | 1360.1629        | 2718.3344      | 1359.6709        | 23 |
| 10 | 914.3850  | 457.6961        | 897.3585       | 449.1829         | 896.3745       | 448.6909         | P    | 2621.3181 | 1311.1627       | 2604.2915      | 1302.6494        | 2603.3075      | 1302.1574        | 22 |
| 11 | 1042.4436 | 521.7254        | 1025.4170      | 513.2122         | 1024.4330      | 512.7202         | Q    | 2524.2653 | 1262.6363       | 2507.2388      | 1254.1230        | 2506.2547      | 1253.6310        | 21 |
| 12 | 1228.5229 | 614.7651        | 1211.4964      | 606.2518         | 1210.5123      | 605.7598         | W    | 2396.2067 | 1198.6070       | 2379.1802      | 1190.0937        | 2378.1962      | 1189.6017        | 20 |
| 13 | 1357.5655 | 679.2864        | 1340.5390      | 670.7731         | 1339.5549      | 670.2811         | E    | 2210.1274 | 1105.5673       | 2193.1009      | 1097.0541        | 2192.1168      | 1096.5621        | 19 |
| 14 | 1485.6241 | 743.3157        | 1468.5975      | 734.8024         | 1467.6135      | 734.3104         | Q    | 2081.0848 | 1041.0460       | 2064.0583      | 1032.5328        | 2063.0743      | 1032.0408        | 18 |
| 15 | 1598.7081 | 799.8577        | 1581.6816      | 791.3444         | 1580.6976      | 790.8524         | L    | 1953.0262 | 977.0168        | 1935.9997      | 968.5035         | 1935.0157      | 968.0115         | 17 |
| 16 | 1712.7511 | 856.8792        | 1695.7245      | 848.3659         | 1694.7405      | 847.8739         | N    | 1839.9422 | 920.4747        | 1822.9156      | 911.9615         | 1821.9316      | 911.4694         | 16 |
| 17 | 1826.7940 | 913.9006        | 1809.7674      | 905.3874         | 1808.7834      | 904.8954         | N    | 1725.8993 | 863.4533        | 1708.8727      | 854.9400         | 1707.8887      | 854.4480         | 15 |
| 18 | 1954.8890 | 977.9481        | 1937.8624      | 969.4348         | 1936.8784      | 968.9428         | K    | 1611.8563 | 806.4318        | 1594.8298      | 797.9185         | 1593.8458      | 797.4265         | 14 |
| 19 | 2069.9159 | 1035.4616       | 2052.8894      | 1026.9483        | 2051.9053      | 1026.4563        | N    | 1483.7614 | 742.3843        | 1466.7348      | 733.8710         | 1465.7508      | 733.3790         | 13 |
| 20 | 2183.0000 | 1092.0036       | 2165.9734      | 1083.4903        | 2164.9894      | 1082.9983        | L    | 1368.7344 | 684.8708        | 1351.7079      | 676.3576         | 1350.7239      | 675.8656         | 12 |
| 21 | 2270.0320 | 1135.5196       | 2253.0054      | 1127.0064        | 2252.0214      | 1126.5144        | S    | 1255.6504 | 628.3288        | 1238.6238      | 619.8155         | 1237.6398      | 619.3235         | 11 |
| 22 | 2401.0725 | 1201.0399       | 2384.0459      | 1192.5266        | 2383.0619      | 1192.0346        | M    | 1168.6183 | 584.8128        | 1151.5918      | 576.2995         | 1150.6078      | 575.8075         | 10 |
| 23 | 2498.1252 | 1249.5663       | 2481.0987      | 1241.0530        | 2480.1147      | 1240.5610        | P    | 1037.5778 | 519.2926        | 1020.5513      | 510.7793         | 1019.5673      | 510.2873         | 9  |



|    |           |           |           |           |           |           |   |          |          |          |          |          |          |   |
|----|-----------|-----------|-----------|-----------|-----------|-----------|---|----------|----------|----------|----------|----------|----------|---|
| 24 | 2611.2093 | 1306.1083 | 2594.1828 | 1297.5950 | 2593.1987 | 1297.1030 | L | 940.5251 | 470.7662 | 923.4985 | 462.2529 | 922.5145 | 461.7609 | 8 |
| 25 | 2724.2934 | 1362.6503 | 2707.2668 | 1354.1370 | 2706.2828 | 1353.6450 | L | 827.4410 | 414.2241 | 810.4145 | 405.7109 | 809.4305 | 405.2189 | 7 |
| 26 | 2821.3461 | 1411.1767 | 2804.3196 | 1402.6634 | 2803.3356 | 1402.1714 | P | 714.3570 | 357.6821 | 697.3304 | 349.1688 | 696.3464 | 348.6768 | 6 |
| 27 | 2892.3833 | 1446.6953 | 2875.3567 | 1438.1820 | 2874.3727 | 1437.6900 | A | 617.3042 | 309.1557 | 600.2776 | 300.6425 | 599.2936 | 300.1504 | 5 |
| 28 | 3007.4102 | 1504.2087 | 2990.3836 | 1495.6955 | 2989.3996 | 1495.2035 | D | 546.2671 | 273.6372 | 529.2405 | 265.1239 | 528.2565 | 264.6319 | 4 |
| 29 | 3154.4786 | 1577.7429 | 3137.4521 | 1569.2297 | 3136.4680 | 1568.7377 | F | 431.2401 | 216.1237 | 414.2136 | 207.6104 |          |          | 3 |
| 30 | 3291.5375 | 1646.2724 | 3274.5110 | 1637.7591 | 3273.5270 | 1637.2671 | H | 284.1717 | 142.5895 | 267.1452 | 134.0762 |          |          | 2 |
| 31 |           |           |           |           |           |           | K | 147.1128 | 74.0600  | 130.0863 | 65.5468  |          |          | 1 |

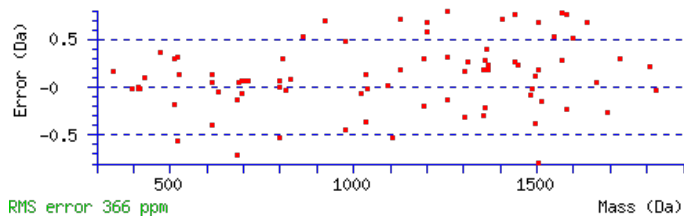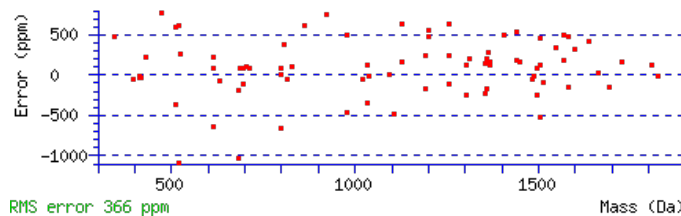

NCBI BLAST search of [GGETAQSADPQWEQLNNKNLSMPLLPADFHK](#)

(Parameters: blastp, nr protein database, expect=20000, no filter, PAM30)

Other BLAST [web gateways](#)

All matches to this query

| Score | Mr(calc)  | Delta   | Sequence                                        | Site Analysis         |
|-------|-----------|---------|-------------------------------------------------|-----------------------|
| 72.9  | 3436.6357 | 0.0163  | <a href="#">GGETAQSADPQWEQLNNKNLSMPLLPADFHK</a> | Deamidated N19 45.29% |
| 72.8  | 3436.6357 | 0.0163  | <a href="#">GGETAQSADPQWEQLNNKNLSMPLLPADFHK</a> | Deamidated N17 45.08% |
| 66.0  | 3436.6357 | 0.0163  | <a href="#">GGETAQSADPQWEQLNNKNLSMPLLPADFHK</a> | Deamidated N16 9.38%  |
| 50.0  | 3436.6357 | 0.0163  | <a href="#">GGETAQSADPQWEQLNNKNLSMPLLPADFHK</a> | Deamidated Q14 0.23%  |
| 39.5  | 3436.6357 | 0.0163  | <a href="#">GGETAQSADPQWEQLNNKNLSMPLLPADFHK</a> | Deamidated Q11 0.02%  |
| 33.4  | 3436.6357 | 0.0163  | <a href="#">GGETAQSADPQWEQLNNKNLSMPLLPADFHK</a> | Deamidated Q6 0.01%   |
| 25.5  | 3435.6517 | 1.0003  | <a href="#">GGETAQSADPQWEQLNNKNLSMPLLPADFHK</a> |                       |
| 5.8   | 3436.6555 | -0.0034 | <a href="#">KISEQLVELAAENQLIPSPMDPPELGNNESR</a> |                       |
| 4.2   | 3435.6546 | 0.9974  | <a href="#">IMKLVNVTSESTLQTNMPMVYEITFCRGR</a>   |                       |
| 4.2   | 3435.6546 | 0.9974  | <a href="#">IMKLVNVTSESTLQTNMPMVYEITFCRGR</a>   |                       |

Mascot: <http://www.matrixscience.com/>

# MATRIX SCIENCE Mascot Search Results

## Peptide View

MS/MS Fragmentation of **GGETAQSADPQWEQLNKNLSMPLLPADFHK**

Found in **P05546** in **con\_Xuniprot\_HUMAN3**, HEP2\_HUMAN Heparin cofactor 2 OS=Homo sapiens GN=SERPIND1 PE=1 SV=3

Match to Query 27743: 3437.636622 from(1146.886150,3+) intensity(31734.4746) rtinseconds(2028) scans(4926) index(9034)

Title: 111019\_Est\_ISCardio\_NMI\_YS\_G\_4Spectrum4230\_scans\_\_4926

Data file C:\mascot\20140703\_Tmgf\_1D\CSV\_UseAnalysis\MasterCSV\All\_Glyco\mgf\ptm\UC18ERLIC\_PTM\_35D.mgf

Click mouse within plot area to zoom in by factor of two about that point

Or, to Da

Label all possible matches Label matches used for scoring

Show Y-axis

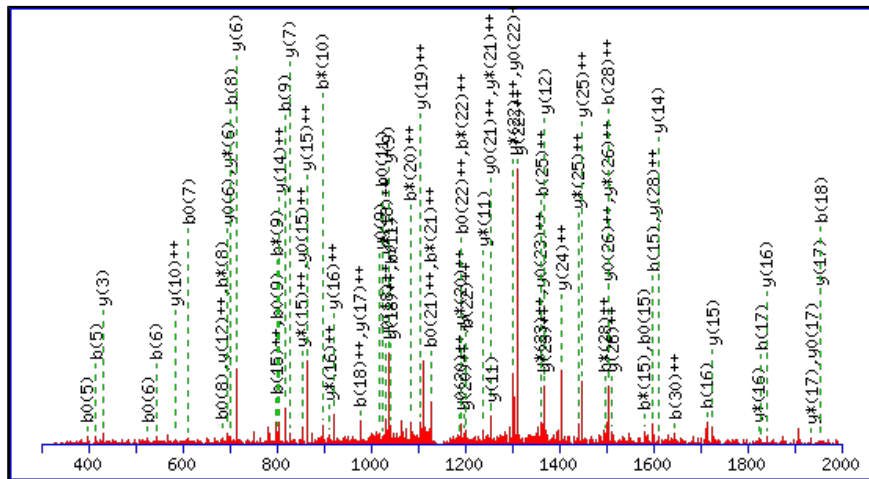

Monoisotopic mass of neutral peptide Mr(calc): 3437.6197

Fixed modifications: Carbamidomethyl (C) (apply to specified residues or termini only)

Variable modifications:

N16 : Deamidated (NQ)

N19 : Deamidated (NQ)

Ions Score: 51 Expect: 0.0019

Matches : 80/340 fragment ions using 170 most intense peaks ([help](#))

| #  | b                | b <sup>++</sup>  | b <sup>*</sup>   | b <sup>*++</sup> | b <sup>0</sup>   | b <sup>0++</sup> | Seq. | y                | y <sup>++</sup>  | y <sup>*</sup>   | y <sup>*++</sup> | y <sup>0</sup>   | y <sup>0++</sup> | #  |
|----|------------------|------------------|------------------|------------------|------------------|------------------|------|------------------|------------------|------------------|------------------|------------------|------------------|----|
| 1  | 58.0287          | 29.5180          |                  |                  |                  |                  | G    |                  |                  |                  |                  |                  |                  | 31 |
| 2  | 115.0502         | 58.0287          |                  |                  |                  |                  | G    | 3381.6056        | 1691.3064        | 3364.5790        | 1682.7932        | 3363.5950        | 1682.3012        | 30 |
| 3  | 244.0928         | 122.5500         |                  |                  | 226.0822         | 113.5448         | E    | 3324.5841        | 1662.7957        | 3307.5576        | 1654.2824        | 3306.5736        | 1653.7904        | 29 |
| 4  | 345.1405         | 173.0739         |                  |                  | 327.1299         | 164.0686         | T    | 3195.5415        | 1598.2744        | 3178.5150        | 1589.7611        | 3177.5310        | 1589.2691        | 28 |
| 5  | <b>416.1776</b>  | 208.5924         |                  |                  | 398.1670         | 199.5872         | A    | 3094.4939        | 1547.7506        | 3077.4673        | 1539.2373        | 3076.4833        | 1538.7453        | 27 |
| 6  | <b>544.2362</b>  | 272.6217         | 527.2096         | 264.1084         | <b>526.2256</b>  | 263.6164         | Q    | 3023.4567        | <b>1512.2320</b> | 3006.4302        | <b>1503.7187</b> | 3005.4462        | <b>1503.2267</b> | 26 |
| 7  | 631.2682         | 316.1377         | 614.2416         | 307.6245         | <b>613.2576</b>  | 307.1325         | S    | 2895.3982        | <b>1448.2027</b> | 2878.3716        | <b>1439.6894</b> | 2877.3876        | 1439.1974        | 25 |
| 8  | <b>702.3053</b>  | 351.6563         | <b>685.2788</b>  | 343.1430         | <b>684.2947</b>  | 342.6510         | A    | 2808.3661        | <b>1404.6867</b> | 2791.3396        | 1396.1734        | 2790.3556        | 1395.6814        | 24 |
| 9  | <b>817.3323</b>  | 409.1698         | <b>800.3057</b>  | 400.6565         | <b>799.3217</b>  | 400.1645         | D    | 2737.3290        | <b>1369.1682</b> | 2720.3025        | <b>1360.6549</b> | 2719.3185        | <b>1360.1629</b> | 23 |
| 10 | 914.3850         | 457.6961         | <b>897.3585</b>  | 449.1829         | 896.3745         | 448.6909         | P    | 2622.3021        | <b>1311.6547</b> | 2605.2755        | <b>1303.1414</b> | 2604.2915        | <b>1302.6494</b> | 22 |
| 11 | <b>1042.4436</b> | 521.7254         | 1025.4170        | 513.2122         | <b>1024.4330</b> | 512.7202         | Q    | 2525.2493        | 1263.1283        | 2508.2228        | <b>1254.6150</b> | 2507.2388        | <b>1254.1230</b> | 21 |
| 12 | 1228.5229        | 614.7651         | 1211.4964        | 606.2518         | 1210.5123        | 605.7598         | W    | 2397.1907        | <b>1199.0990</b> | 2380.1642        | <b>1190.5857</b> | 2379.1802        | <b>1190.0937</b> | 20 |
| 13 | 1357.5655        | 679.2864         | 1340.5390        | 670.7731         | 1339.5549        | 670.2811         | E    | 2211.1114        | <b>1106.0594</b> | 2194.0849        | 1097.5461        | 2193.1009        | 1097.0541        | 19 |
| 14 | 1485.6241        | 743.3157         | 1468.5975        | 734.8024         | 1467.6135        | 734.3104         | Q    | 2082.0688        | <b>1041.5381</b> | 2065.0423        | <b>1033.0248</b> | 2064.0583        | <b>1032.5328</b> | 18 |
| 15 | <b>1598.7081</b> | <b>799.8577</b>  | <b>1581.6816</b> | 791.3444         | <b>1580.6976</b> | 790.8524         | L    | <b>1954.0103</b> | <b>977.5088</b>  | <b>1936.9837</b> | 968.9955         | <b>1935.9997</b> | 968.5035         | 17 |
| 16 | <b>1713.7351</b> | 857.3712         | 1696.7085        | 848.8579         | 1695.7245        | 848.3659         | N    | <b>1840.9262</b> | <b>920.9667</b>  | <b>1823.8996</b> | <b>912.4535</b>  | 1822.9156        | 911.9615         | 16 |
| 17 | <b>1827.7780</b> | 914.3926         | 1810.7515        | 905.8794         | 1809.7674        | 905.3874         | N    | <b>1725.8993</b> | <b>863.4533</b>  | 1708.8727        | <b>854.9400</b>  | 1707.8887        | <b>854.4480</b>  | 15 |
| 18 | <b>1955.8730</b> | <b>978.4401</b>  | 1938.8464        | 969.9269         | 1937.8624        | 969.4348         | K    | <b>1611.8563</b> | <b>806.4318</b>  | 1594.8298        | 797.9185         | 1593.8458        | 797.4265         | 14 |
| 19 | 2070.8999        | 1035.9536        | 2053.8734        | 1027.4403        | 2052.8894        | 1026.9483        | N    | 1483.7614        | 742.3843         | 1466.7348        | 733.8710         | 1465.7508        | 733.3790         | 13 |
| 20 | 2183.9840        | 1092.4956        | 2166.9574        | <b>1083.9824</b> | 2165.9734        | 1083.4903        | L    | <b>1368.7344</b> | <b>684.8708</b>  | 1351.7079        | 676.3576         | 1350.7239        | 675.8656         | 12 |
| 21 | 2271.0160        | 1136.0116        | 2253.9895        | <b>1127.4984</b> | 2253.0054        | <b>1127.0064</b> | S    | <b>1255.6504</b> | 628.3288         | <b>1238.6238</b> | 619.8155         | 1237.6398        | 619.3235         | 11 |
| 22 | 2402.0565        | <b>1201.5319</b> | 2385.0299        | <b>1193.0186</b> | 2384.0459        | <b>1192.5266</b> | M    | 1168.6183        | <b>584.8128</b>  | 1151.5918        | 576.2995         | 1150.6078        | 575.8075         | 10 |

|    |           |                  |           |                  |           |           |   |                  |          |                 |          |                  |          |   |
|----|-----------|------------------|-----------|------------------|-----------|-----------|---|------------------|----------|-----------------|----------|------------------|----------|---|
| 23 | 2499.1093 | 1250.0583        | 2482.0827 | 1241.5450        | 2481.0987 | 1241.0530 | P | <b>1037.5778</b> | 519.2926 | 1020.5513       | 510.7793 | <b>1019.5673</b> | 510.2873 | 9 |
| 24 | 2612.1933 | 1306.6003        | 2595.1668 | 1298.0870        | 2594.1828 | 1297.5950 | L | 940.5251         | 470.7662 | 923.4985        | 462.2529 | 922.5145         | 461.7609 | 8 |
| 25 | 2725.2774 | <b>1363.1423</b> | 2708.2508 | 1354.6291        | 2707.2668 | 1354.1370 | L | <b>827.4410</b>  | 414.2241 | 810.4145        | 405.7109 | 809.4305         | 405.2189 | 7 |
| 26 | 2822.3302 | 1411.6687        | 2805.3036 | 1403.1554        | 2804.3196 | 1402.6634 | P | <b>714.3570</b>  | 357.6821 | <b>697.3304</b> | 349.1688 | <b>696.3464</b>  | 348.6768 | 6 |
| 27 | 2893.3673 | 1447.1873        | 2876.3407 | 1438.6740        | 2875.3567 | 1438.1820 | A | 617.3042         | 309.1557 | 600.2776        | 300.6425 | 599.2936         | 300.1504 | 5 |
| 28 | 3008.3942 | <b>1504.7007</b> | 2991.3677 | <b>1496.1875</b> | 2990.3836 | 1495.6955 | D | 546.2671         | 273.6372 | 529.2405        | 265.1239 | 528.2565         | 264.6319 | 4 |
| 29 | 3155.4626 | 1578.2349        | 3138.4361 | 1569.7217        | 3137.4521 | 1569.2297 | F | <b>431.2401</b>  | 216.1237 | 414.2136        | 207.6104 |                  |          | 3 |
| 30 | 3292.5215 | <b>1646.7644</b> | 3275.4950 | 1638.2511        | 3274.5110 | 1637.7591 | H | 284.1717         | 142.5895 | 267.1452        | 134.0762 |                  |          | 2 |
| 31 |           |                  |           |                  |           |           | K | 147.1128         | 74.0600  | 130.0863        | 65.5468  |                  |          | 1 |

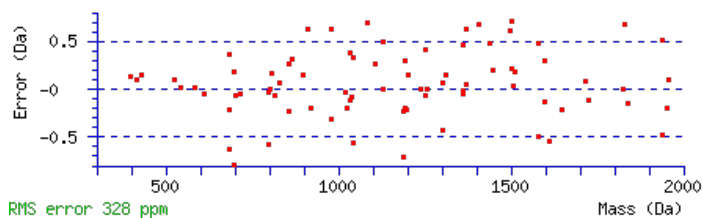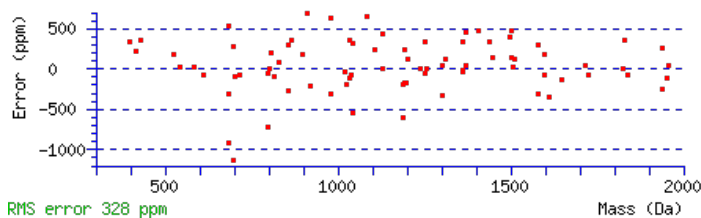

NCBI BLAST search of [GGETAQSADPQWEQLNKNLSMPLLPADFHK](#)  
 (Parameters: blastp, nr protein database, expect=20000, no filter, PAM30)  
 Other BLAST [web gateways](#)

All matches to this query

| Score | Mr(calc)  | Delta  | Sequence                                       | Site Analysis              |
|-------|-----------|--------|------------------------------------------------|----------------------------|
| 51.4  | 3437.6197 | 0.0169 | <a href="#">GGETAQSADPQWEQLNKNLSMPLLPADFHK</a> | Deamidated N16, N19 22.08% |
| 50.8  | 3437.6197 | 0.0169 | <a href="#">GGETAQSADPQWEQLNKNLSMPLLPADFHK</a> | Deamidated N16, N17 19.41% |
| 50.8  | 3437.6197 | 0.0169 | <a href="#">GGETAQSADPQWEQLNKNLSMPLLPADFHK</a> | Deamidated N17, N19 19.19% |
| 48.0  | 3437.6197 | 0.0169 | <a href="#">GGETAQSADPQWEQLNKNLSMPLLPADFHK</a> | Deamidated Q14, N19 10.14% |
| 47.4  | 3437.6197 | 0.0169 | <a href="#">GGETAQSADPQWEQLNKNLSMPLLPADFHK</a> | Deamidated Q14, N17 8.96%  |
| 44.5  | 3437.6197 | 0.0169 | <a href="#">GGETAQSADPQWEQLNKNLSMPLLPADFHK</a> | Deamidated Q11, N17 4.59%  |
| 44.5  | 3437.6197 | 0.0169 | <a href="#">GGETAQSADPQWEQLNKNLSMPLLPADFHK</a> | Deamidated Q11, N19 4.54%  |
| 40.5  | 3437.6197 | 0.0169 | <a href="#">GGETAQSADPQWEQLNKNLSMPLLPADFHK</a> | Deamidated Q6, N19 1.80%   |
| 40.5  | 3437.6197 | 0.0169 | <a href="#">GGETAQSADPQWEQLNKNLSMPLLPADFHK</a> | Deamidated Q6, N17 1.80%   |
| 39.9  | 3436.6357 | 1.0009 | <a href="#">GGETAQSADPQWEQLNKNLSMPLLPADFHK</a> |                            |

Mascot: <http://www.matrixscience.com/>

# MATRIX SCIENCE Mascot Search Results

## Peptide View

MS/MS Fragmentation of **GGETAQSADPQWEQLNKNLSMPLLPADPHK**

Found in **P05546** in **con\_Xuniprot\_HUMAN3**, HEP2\_HUMAN Heparin cofactor 2 OS=Homo sapiens GN=SERPIND1 PE=1 SV=3

Match to Query 27765: 3452.646462 from(1151.889430,3+) intensity(57500.5234) rtinseconds(1707) scans(4198) index(23251)

Title: 111019\_Est\_MI\_YS\_G\_04Spectrum3606\_scans\_\_4198

Data file C:\mascot\20140703\_Tmgf\_1D\CSV\_UseAnalysis\MasterCSV\All\_Glyco\mgf\ptm\UC18ERLIC\_PTM\_35D.mgf

Click mouse within plot area to zoom in by factor of two about that point

Or, to Da

Label all possible matches Label matches used for scoring

Show Y-axis

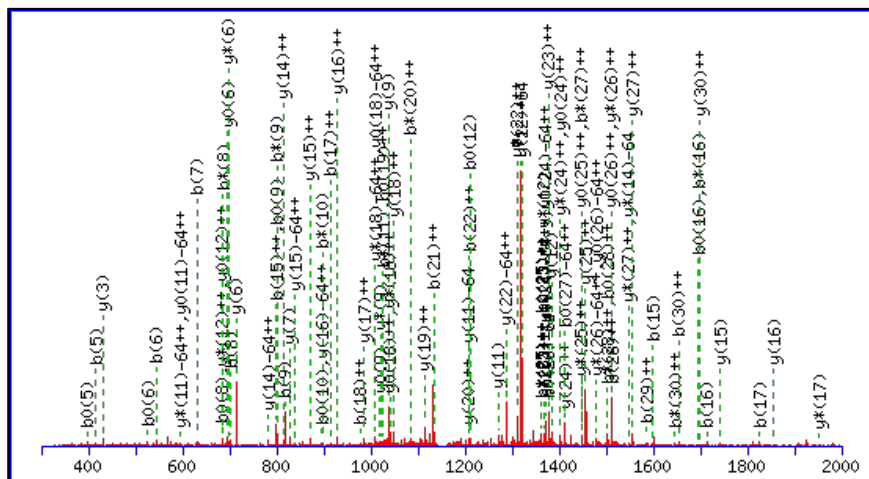

Monoisotopic mass of neutral peptide Mr(calc): 3452.6306

Fixed modifications: Carbamidomethyl (C) (apply to specified residues or termini only)

Variable modifications:

N19 : Deamidated (NQ)

M22 : Oxidation (M), with neutral losses 0.0000(shown in table), 63.9983

Ions Score: 48 Expect: 0.0038

Matches : 96/520 fragment ions using 170 most intense peaks ([help](#))

| #  | b         | b <sup>++</sup> | b <sup>*</sup> | b <sup>*++</sup> | b <sup>0</sup> | b <sup>0++</sup> | Seq. | y         | y <sup>++</sup> | y <sup>*</sup> | y <sup>*++</sup> | y <sup>0</sup> | y <sup>0++</sup> | #  |
|----|-----------|-----------------|----------------|------------------|----------------|------------------|------|-----------|-----------------|----------------|------------------|----------------|------------------|----|
| 1  | 58.0287   | 29.5180         |                |                  |                |                  | G    |           |                 |                |                  |                |                  | 31 |
| 2  | 115.0502  | 58.0287         |                |                  |                |                  | G    | 3396.6165 | 1698.8119       | 3379.5899      | 1690.2986        | 3378.6059      | 1689.8066        | 30 |
| 3  | 244.0928  | 122.5500        |                |                  | 226.0822       | 113.5448         | E    | 3339.5950 | 1670.3012       | 3322.5685      | 1661.7879        | 3321.5845      | 1661.2959        | 29 |
| 4  | 345.1405  | 173.0739        |                |                  | 327.1299       | 164.0686         | T    | 3210.5524 | 1605.7799       | 3193.5259      | 1597.2666        | 3192.5419      | 1596.7746        | 28 |
| 5  | 416.1776  | 208.5924        |                |                  | 398.1670       | 199.5872         | A    | 3109.5048 | 1555.2560       | 3092.4782      | 1546.7427        | 3091.4942      | 1546.2507        | 27 |
| 6  | 544.2362  | 272.6217        | 527.2096       | 264.1084         | 526.2256       | 263.6164         | Q    | 3038.4676 | 1519.7375       | 3021.4411      | 1511.2242        | 3020.4571      | 1510.7322        | 26 |
| 7  | 631.2682  | 316.1377        | 614.2416       | 307.6245         | 613.2576       | 307.1325         | S    | 2910.4091 | 1455.7082       | 2893.3825      | 1447.1949        | 2892.3985      | 1446.7029        | 25 |
| 8  | 702.3053  | 351.6563        | 685.2788       | 343.1430         | 684.2947       | 342.6510         | A    | 2823.3770 | 1412.1922       | 2806.3505      | 1403.6789        | 2805.3665      | 1403.1869        | 24 |
| 9  | 817.3323  | 409.1698        | 800.3057       | 400.6565         | 799.3217       | 400.1645         | D    | 2752.3399 | 1376.6736       | 2735.3134      | 1368.1603        | 2734.3294      | 1367.6683        | 23 |
| 10 | 914.3850  | 457.6961        | 897.3585       | 449.1829         | 896.3745       | 448.6909         | P    | 2637.3130 | 1319.1601       | 2620.2864      | 1310.6469        | 2619.3024      | 1310.1548        | 22 |
| 11 | 1042.4436 | 521.7254        | 1025.4170      | 513.2122         | 1024.4330      | 512.7202         | Q    | 2540.2602 | 1270.6337       | 2523.2337      | 1262.1205        | 2522.2497      | 1261.6285        | 21 |
| 12 | 1228.5229 | 614.7651        | 1211.4964      | 606.2518         | 1210.5123      | 605.7598         | W    | 2412.2016 | 1206.6045       | 2395.1751      | 1198.0912        | 2394.1911      | 1197.5992        | 20 |
| 13 | 1357.5655 | 679.2864        | 1340.5390      | 670.7731         | 1339.5549      | 670.2811         | E    | 2226.1223 | 1113.5648       | 2209.0958      | 1105.0515        | 2208.1118      | 1104.5595        | 19 |
| 14 | 1485.6241 | 743.3157        | 1468.5975      | 734.8024         | 1467.6135      | 734.3104         | Q    | 2097.0797 | 1049.0435       | 2080.0532      | 1040.5302        | 2079.0692      | 1040.0382        | 18 |
| 15 | 1598.7081 | 799.8577        | 1581.6816      | 791.3444         | 1580.6976      | 790.8524         | L    | 1969.0212 | 985.0142        | 1951.9946      | 976.5009         | 1951.0106      | 976.0089         | 17 |
| 16 | 1712.7511 | 856.8792        | 1695.7245      | 848.3659         | 1694.7405      | 847.8739         | N    | 1855.9371 | 928.4722        | 1838.9105      | 919.9589         | 1837.9265      | 919.4669         | 16 |
| 17 | 1826.7940 | 913.9006        | 1809.7674      | 905.3874         | 1808.7834      | 904.8954         | N    | 1741.8942 | 871.4507        | 1724.8676      | 862.9374         | 1723.8836      | 862.4454         | 15 |
| 18 | 1954.8890 | 977.9481        | 1937.8624      | 969.4348         | 1936.8784      | 968.9428         | K    | 1627.8512 | 814.4293        | 1610.8247      | 805.9160         | 1609.8407      | 805.4240         | 14 |
| 19 | 2069.9159 | 1035.4616       | 2052.8894      | 1026.9483        | 2051.9053      | 1026.4563        | N    | 1499.7563 | 750.3818        | 1482.7297      | 741.8685         | 1481.7457      | 741.3765         | 13 |
| 20 | 2183.0000 | 1092.0036       | 2165.9734      | 1083.4903        | 2164.9894      | 1082.9983        | L    | 1384.7293 | 692.8683        | 1367.7028      | 684.3550         | 1366.7188      | 683.8630         | 12 |
| 21 | 2270.0320 | 1135.5196       | 2253.0054      | 1127.0064        | 2252.0214      | 1126.5144        | S    | 1271.6453 | 636.3263        | 1254.6187      | 627.8130         | 1253.6347      | 627.3210         | 11 |
| 22 | 2417.0674 | 1209.0373       | 2400.0408      | 1200.5241        | 2399.0568      | 1200.0321        | M    | 1184.6132 | 592.8103        | 1167.5867      | 584.2970         | 1166.6027      | 583.8050         | 10 |

|    |           |           |           |           |           |           |   |           |          |           |          |           |          |   |
|----|-----------|-----------|-----------|-----------|-----------|-----------|---|-----------|----------|-----------|----------|-----------|----------|---|
| 23 | 2514.1202 | 1257.5637 | 2497.0936 | 1249.0504 | 2496.1096 | 1248.5584 | P | 1037.5778 | 519.2926 | 1020.5513 | 510.7793 | 1019.5673 | 510.2873 | 9 |
| 24 | 2627.2042 | 1314.1057 | 2610.1777 | 1305.5925 | 2609.1937 | 1305.1005 | L | 940.5251  | 470.7662 | 923.4985  | 462.2529 | 922.5145  | 461.7609 | 8 |
| 25 | 2740.2883 | 1370.6478 | 2723.2617 | 1362.1345 | 2722.2777 | 1361.6425 | L | 827.4410  | 414.2241 | 810.4145  | 405.7109 | 809.4305  | 405.2189 | 7 |
| 26 | 2837.3411 | 1419.1742 | 2820.3145 | 1410.6609 | 2819.3305 | 1410.1689 | P | 714.3570  | 357.6821 | 697.3304  | 349.1688 | 696.3464  | 348.6768 | 6 |
| 27 | 2908.3782 | 1454.6927 | 2891.3516 | 1446.1794 | 2890.3676 | 1445.6874 | A | 617.3042  | 309.1557 | 600.2776  | 300.6425 | 599.2936  | 300.1504 | 5 |
| 28 | 3023.4051 | 1512.2062 | 3006.3786 | 1503.6929 | 3005.3945 | 1503.2009 | D | 546.2671  | 273.6372 | 529.2405  | 265.1239 | 528.2565  | 264.6319 | 4 |
| 29 | 3170.4735 | 1585.7404 | 3153.4470 | 1577.2271 | 3152.4630 | 1576.7351 | F | 431.2401  | 216.1237 | 414.2136  | 207.6104 |           |          | 3 |
| 30 | 3307.5324 | 1654.2699 | 3290.5059 | 1645.7566 | 3289.5219 | 1645.2646 | H | 284.1717  | 142.5895 | 267.1452  | 134.0762 |           |          | 2 |
| 31 |           |           |           |           |           |           | K | 147.1128  | 74.0600  | 130.0863  | 65.5468  |           |          | 1 |

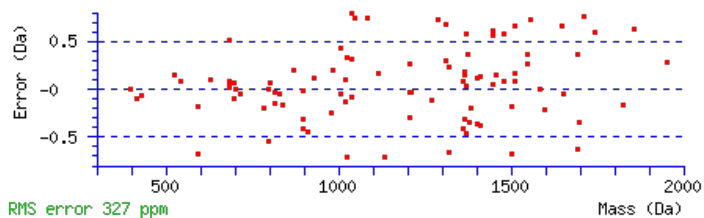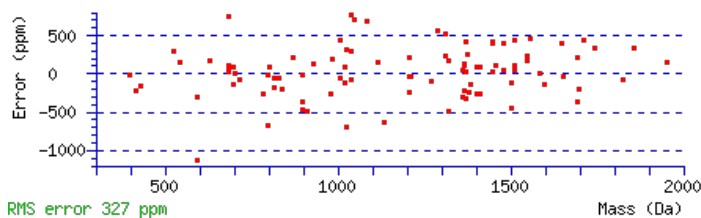

NCBI BLAST search of [GGETAQSADPQWEQLNNKNLSMPLLPADFHK](#)  
 (Parameters: blastp, nr protein database, expect=20000, no filter, PAM30)  
 Other BLAST [web gateways](#)

All matches to this query

| Score | Mr(calc)  | Delta  | Sequence                                        | Site Analysis         |
|-------|-----------|--------|-------------------------------------------------|-----------------------|
| 48.1  | 3452.6306 | 0.0158 | <a href="#">GGETAQSADPQWEQLNNKNLSMPLLPADFHK</a> | Deamidated N19 29.07% |
| 47.4  | 3452.6306 | 0.0158 | <a href="#">GGETAQSADPQWEQLNNKNLSMPLLPADFHK</a> | Deamidated N16 24.46% |
| 47.4  | 3452.6306 | 0.0158 | <a href="#">GGETAQSADPQWEQLNNKNLSMPLLPADFHK</a> | Deamidated N17 24.46% |
| 45.9  | 3452.6306 | 0.0158 | <a href="#">GGETAQSADPQWEQLNNKNLSMPLLPADFHK</a> | Deamidated Q14 17.23% |
| 40.2  | 3452.6306 | 0.0158 | <a href="#">GGETAQSADPQWEQLNNKNLSMPLLPADFHK</a> | Deamidated Q11 4.65%  |
| 33.6  | 3451.6466 | 0.9998 | <a href="#">GGETAQSADPQWEQLNNKNLSMPLLPADFHK</a> |                       |
| 24.8  | 3452.6306 | 0.0158 | <a href="#">GGETAQSADPQWEQLNNKNLSMPLLPADFHK</a> | Deamidated Q6 0.14%   |
| 8.8   | 3452.6439 | 0.0026 | <a href="#">QAEMECRLESLOAELGGILGQIQQLQTAYR</a>  |                       |
| 7.1   | 3450.6460 | 2.0005 | <a href="#">NDCEELVPKLGEOQLLEAEQGGQQLGEPER</a>  |                       |
| 7.1   | 3450.6460 | 2.0005 | <a href="#">NDCEELVPKLGEOQLLEAEQGGQQLGEPER</a>  |                       |

Mascot: <http://www.matrixscience.com/>



# MASCOT SCIENCE Mascot Search Results

## Peptide View

MS/MS Fragmentation of **GGETAQSADPQWEQLNKNLSMPLLPADPHK**

Found in **P05546** in **con\_Xuniprot\_HUMAN3**, HEP2\_HUMAN Heparin cofactor 2 OS=Homo sapiens GN=SERPIND1 PE=1 SV=3

Match to Query 27773: 3453.630016 from(864.414780,4+) intensity(60341.8516) rtinseconds(1686) scans(4244) index(9515)

Title: 111019\_Est\_ISCardio\_NMI\_YS\_G\_5Spectrum3631\_scans\_4244

Data file C:\\mascot\\20140703\_Tmgf\_1D\\CSV\_UseAnalysis\\MasterCSV\\All\_Glyco\\mgf\\ptm\\UC18ERLIC\_PTM\_35D.mgf

Click mouse within plot area to zoom in by factor of two about that point

Or, to Da

Label all possible matches Label matches used for scoring

Show Y-axis

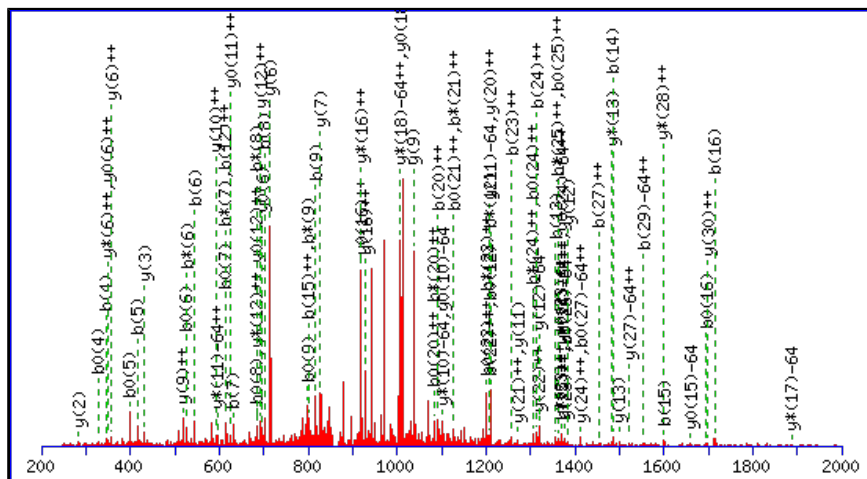

Monoisotopic mass of neutral peptide Mr(calc): 3453.6147

Fixed modifications: Carbamidomethyl (C) (apply to specified residues or termini only)

Variable modifications:

Q14 : Deamidated (NQ)

N19 : Deamidated (NQ)

M22 : Oxidation (M), with neutral losses 0.0000(shown in table), 63.9983

Ions Score: 47 Expect: 0.0042

Matches : 87/520 fragment ions using 139 most intense peaks (help)

| #  | b         | b <sup>++</sup> | b <sup>*</sup> | b <sup>*++</sup> | b <sup>0</sup> | b <sup>0++</sup> | Seq. | y         | y <sup>++</sup> | y <sup>*</sup> | y <sup>*++</sup> | y <sup>0</sup> | y <sup>0++</sup> | #  |
|----|-----------|-----------------|----------------|------------------|----------------|------------------|------|-----------|-----------------|----------------|------------------|----------------|------------------|----|
| 1  | 58.0287   | 29.5180         |                |                  |                |                  | G    |           |                 |                |                  |                |                  | 31 |
| 2  | 115.0502  | 58.0287         |                |                  |                |                  | G    | 3397.6005 | 1699.3039       | 3380.5740      | 1690.7906        | 3379.5899      | 1690.2986        | 30 |
| 3  | 244.0928  | 122.5500        |                |                  | 226.0822       | 113.5448         | E    | 3340.5790 | 1670.7932       | 3323.5525      | 1662.2799        | 3322.5685      | 1661.7879        | 29 |
| 4  | 345.1405  | 173.0739        |                |                  | 327.1299       | 164.0686         | T    | 3211.5365 | 1606.2719       | 3194.5099      | 1597.7586        | 3193.5259      | 1597.2666        | 28 |
| 5  | 416.1776  | 208.5924        |                |                  | 398.1670       | 199.5872         | A    | 3110.4888 | 1555.7480       | 3093.4622      | 1547.2348        | 3092.4782      | 1546.7427        | 27 |
| 6  | 544.2362  | 272.6217        | 527.2096       | 264.1084         | 526.2256       | 263.6164         | Q    | 3039.4517 | 1520.2295       | 3022.4251      | 1511.7162        | 3021.4411      | 1511.2242        | 26 |
| 7  | 631.2682  | 316.1377        | 614.2416       | 307.6245         | 613.2576       | 307.1325         | S    | 2911.3931 | 1456.2002       | 2894.3665      | 1447.6869        | 2893.3825      | 1447.1949        | 25 |
| 8  | 702.3053  | 351.6563        | 685.2788       | 343.1430         | 684.2947       | 342.6510         | A    | 2824.3611 | 1412.6842       | 2807.3345      | 1404.1709        | 2806.3505      | 1403.6789        | 24 |
| 9  | 817.3323  | 409.1698        | 800.3057       | 400.6565         | 799.3217       | 400.1645         | D    | 2753.3239 | 1377.1656       | 2736.2974      | 1368.6523        | 2735.3134      | 1368.1603        | 23 |
| 10 | 914.3850  | 457.6961        | 897.3585       | 449.1829         | 896.3745       | 448.6909         | P    | 2638.2970 | 1319.6521       | 2621.2705      | 1311.1389        | 2620.2864      | 1310.6469        | 22 |
| 11 | 1042.4436 | 521.7254        | 1025.4170      | 513.2122         | 1024.4330      | 512.7202         | Q    | 2541.2442 | 1271.1258       | 2524.2177      | 1262.6125        | 2523.2337      | 1262.1205        | 21 |
| 12 | 1228.5229 | 614.7651        | 1211.4964      | 606.2518         | 1210.5123      | 605.7598         | W    | 2413.1857 | 1207.0965       | 2396.1591      | 1198.5832        | 2395.1751      | 1198.0912        | 20 |
| 13 | 1357.5655 | 679.2864        | 1340.5390      | 670.7731         | 1339.5549      | 670.2811         | E    | 2227.1063 | 1114.0568       | 2210.0798      | 1105.5435        | 2209.0958      | 1105.0515        | 19 |
| 14 | 1486.6081 | 743.8077        | 1469.5815      | 735.2944         | 1468.5975      | 734.8024         | Q    | 2098.0638 | 1049.5355       | 2081.0372      | 1041.0222        | 2080.0532      | 1040.5302        | 18 |
| 15 | 1599.6922 | 800.3497        | 1582.6656      | 791.8364         | 1581.6816      | 791.3444         | L    | 1969.0212 | 985.0142        | 1951.9946      | 976.5009         | 1951.0106      | 976.0089         | 17 |
| 16 | 1713.7351 | 857.3712        | 1696.7085      | 848.8579         | 1695.7245      | 848.3659         | N    | 1855.9371 | 928.4722        | 1838.9105      | 919.9589         | 1837.9265      | 919.4669         | 16 |
| 17 | 1827.7780 | 914.3926        | 1810.7515      | 905.8794         | 1809.7674      | 905.3874         | N    | 1741.8942 | 871.4507        | 1724.8676      | 862.9374         | 1723.8836      | 862.4454         | 15 |
| 18 | 1955.8730 | 978.4401        | 1938.8464      | 969.9269         | 1937.8624      | 969.4348         | K    | 1627.8512 | 814.4293        | 1610.8247      | 805.9160         | 1609.8407      | 805.4240         | 14 |
| 19 | 2070.8999 | 1035.9536       | 2053.8734      | 1027.4403        | 2052.8894      | 1026.9483        | N    | 1499.7563 | 750.3818        | 1482.7297      | 741.8685         | 1481.7457      | 741.3765         | 13 |
| 20 | 2183.9840 | 1092.4956       | 2166.9574      | 1083.9824        | 2165.9734      | 1083.4903        | L    | 1384.7293 | 692.8683        | 1367.7028      | 684.3550         | 1366.7188      | 683.8630         | 12 |
| 21 | 2271.0160 | 1136.0116       | 2253.9895      | 1127.4984        | 2253.0054      | 1127.0064        | S    | 1271.6453 | 636.3263        | 1254.6187      | 627.8130         | 1253.6347      | 627.3210         | 11 |
| 22 | 2418.0514 | 1209.5293       | 2401.0249      | 1201.0161        | 2400.0408      | 1200.5241        | M    | 1184.6132 | 592.8103        | 1167.5867      | 584.2970         | 1166.6027      | 583.8050         | 10 |

|    |           |                  |           |                  |           |                  |          |                  |                 |           |                 |                 |                 |          |
|----|-----------|------------------|-----------|------------------|-----------|------------------|----------|------------------|-----------------|-----------|-----------------|-----------------|-----------------|----------|
| 23 | 2515.1042 | <b>1258.0557</b> | 2498.0776 | 1249.5425        | 2497.0936 | 1249.0504        | <b>P</b> | <b>1037.5778</b> | <b>519.2926</b> | 1020.5513 | 510.7793        | 1019.5673       | 510.2873        | <b>9</b> |
| 24 | 2628.1882 | <b>1314.5978</b> | 2611.1617 | <b>1306.0845</b> | 2610.1777 | <b>1305.5925</b> | <b>L</b> | 940.5251         | 470.7662        | 923.4985  | 462.2529        | 922.5145        | 461.7609        | <b>8</b> |
| 25 | 2741.2723 | <b>1371.1398</b> | 2724.2458 | <b>1362.6265</b> | 2723.2617 | <b>1362.1345</b> | <b>L</b> | <b>827.4410</b>  | 414.2241        | 810.4145  | 405.7109        | 809.4305        | 405.2189        | <b>7</b> |
| 26 | 2838.3251 | 1419.6662        | 2821.2985 | 1411.1529        | 2820.3145 | 1410.6609        | <b>P</b> | <b>714.3570</b>  | <b>357.6821</b> | 697.3304  | <b>349.1688</b> | <b>696.3464</b> | <b>348.6768</b> | <b>6</b> |
| 27 | 2909.3622 | <b>1455.1847</b> | 2892.3356 | 1446.6715        | 2891.3516 | 1446.1794        | <b>A</b> | 617.3042         | 309.1557        | 600.2776  | 300.6425        | 599.2936        | 300.1504        | <b>5</b> |
| 28 | 3024.3891 | 1512.6982        | 3007.3626 | 1504.1849        | 3006.3786 | 1503.6929        | <b>D</b> | 546.2671         | 273.6372        | 529.2405  | 265.1239        | 528.2565        | 264.6319        | <b>4</b> |
| 29 | 3171.4575 | 1586.2324        | 3154.4310 | 1577.7191        | 3153.4470 | 1577.2271        | <b>F</b> | <b>431.2401</b>  | 216.1237        | 414.2136  | 207.6104        |                 |                 | <b>3</b> |
| 30 | 3308.5165 | 1654.7619        | 3291.4899 | 1646.2486        | 3290.5059 | 1645.7566        | <b>H</b> | <b>284.1717</b>  | 142.5895        | 267.1452  | 134.0762        |                 |                 | <b>2</b> |
| 31 |           |                  |           |                  |           |                  | <b>K</b> | 147.1128         | 74.0600         | 130.0863  | 65.5468         |                 |                 | <b>1</b> |

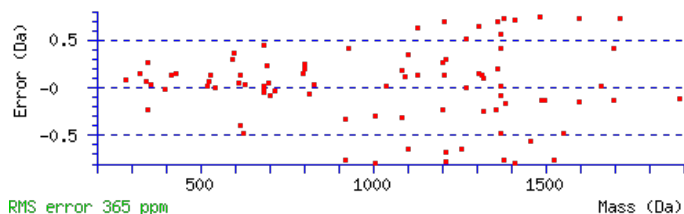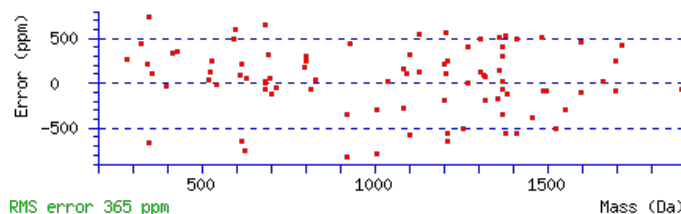

NCBI BLAST search of [GGETAQSADPQWEQLNKNLSMPLLPADFHK](#)

(Parameters: blastp, nr protein database, expect=20000, no filter, PAM30)

Other BLAST [web gateways](#)

All matches to this query

| Score | Mr(calc)  | Delta  | Sequence                                       | Site Analysis              |
|-------|-----------|--------|------------------------------------------------|----------------------------|
| 47.4  | 3453.6147 | 0.0154 | <a href="#">GGETAQSADPQWEQLNKNLSMPLLPADFHK</a> | Deamidated Q14, N19 18.58% |
| 47.1  | 3453.6147 | 0.0154 | <a href="#">GGETAQSADPQWEQLNKNLSMPLLPADFHK</a> | Deamidated N16, N19 17.54% |
| 46.5  | 3453.6147 | 0.0154 | <a href="#">GGETAQSADPQWEQLNKNLSMPLLPADFHK</a> | Deamidated N17, N19 15.38% |
| 45.3  | 3453.6147 | 0.0154 | <a href="#">GGETAQSADPQWEQLNKNLSMPLLPADFHK</a> | Deamidated Q14, N17 11.48% |
| 45.0  | 3453.6147 | 0.0154 | <a href="#">GGETAQSADPQWEQLNKNLSMPLLPADFHK</a> | Deamidated N16, N17 10.84% |
| 44.7  | 3453.6147 | 0.0154 | <a href="#">GGETAQSADPQWEQLNKNLSMPLLPADFHK</a> | Deamidated Q14, N16 10.05% |
| 41.7  | 3452.6306 | 0.9994 | <a href="#">GGETAQSADPQWEQLNKNLSMPLLPADFHK</a> |                            |
| 40.5  | 3453.6147 | 0.0154 | <a href="#">GGETAQSADPQWEQLNKNLSMPLLPADFHK</a> | Deamidated Q11, N19 3.79%  |
| 37.7  | 3453.6147 | 0.0154 | <a href="#">GGETAQSADPQWEQLNKNLSMPLLPADFHK</a> | Deamidated Q11, N17 2.02%  |
| 37.2  | 3453.6147 | 0.0154 | <a href="#">GGETAQSADPQWEQLNKNLSMPLLPADFHK</a> | Deamidated Q11, N16 1.79%  |

Mascot: <http://www.matrixscience.com/>



# MASCOT SCIENCE Mascot Search Results

## Peptide View

MS/MS Fragmentation of **GGETAQSADPQWEQLNKNLSMPLLPADPHK**

Found in **P05546** in **con\_Xuniprot\_HUMAN3**, HEP2\_HUMAN Heparin cofactor 2 OS=Homo sapiens GN=SERPIND1 PE=1 SV=3

Match to Query 27736: 3437.631296 from(860.415100,4+) intensity(113996.0703) rtinseconds(1997) scans(5024) index(23381)

Title: 111019\_Est\_MI\_YS\_G\_04Spectrum4332\_scans\_5024

Data file C:\mascot\20140703\_Tmgf\_1D\CSV\_UseAnalysis\MasterCSV\All\_Glyco\mgf\ptm\UC18ERLIC\_PTM\_35D.mgf

Click mouse within plot area to zoom in by factor of two about that point

Or, to Da

Label all possible matches Label matches used for scoring

Show Y-axis

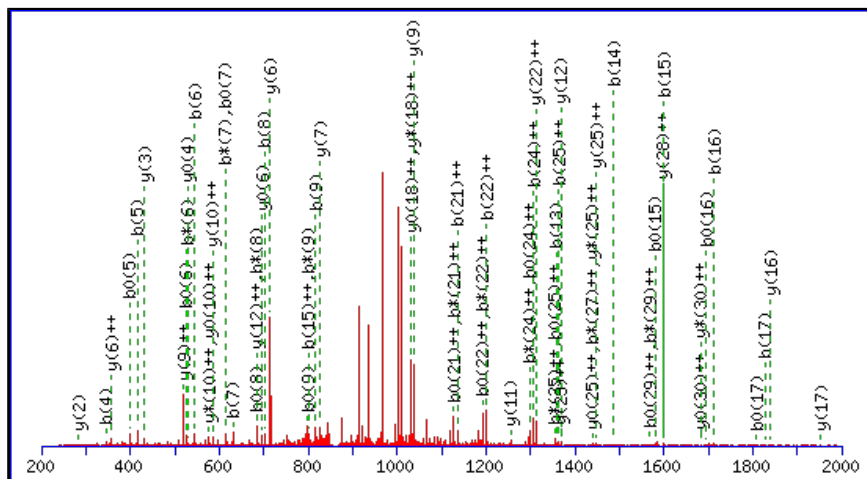

Monoisotopic mass of neutral peptide Mr(calc): 3437.6197

Fixed modifications: Carbamidomethyl (C) (apply to specified residues or termini only)

Variable modifications:

Q11 : Deamidated (NQ)

N19 : Deamidated (NQ)

Ions Score: 47 Expect: 0.0049

Matches : 66/340 fragment ions using 126 most intense peaks ([help](#))

| #  | b         | b <sup>++</sup> | b*        | b <sup>*++</sup> | b <sup>0</sup> | b <sup>0++</sup> | Seq. | y         | y <sup>++</sup> | y*        | y <sup>*++</sup> | y <sup>0</sup> | y <sup>0++</sup> | #  |
|----|-----------|-----------------|-----------|------------------|----------------|------------------|------|-----------|-----------------|-----------|------------------|----------------|------------------|----|
| 1  | 58.0287   | 29.5180         |           |                  |                |                  | G    |           |                 |           |                  |                |                  | 31 |
| 2  | 115.0502  | 58.0287         |           |                  |                |                  | G    | 3381.6056 | 1691.3064       | 3364.5790 | 1682.7932        | 3363.5950      | 1682.3012        | 30 |
| 3  | 244.0928  | 122.5500        |           |                  | 226.0822       | 113.5448         | E    | 3324.5841 | 1662.7957       | 3307.5576 | 1654.2824        | 3306.5736      | 1653.7904        | 29 |
| 4  | 345.1405  | 173.0739        |           |                  | 327.1299       | 164.0686         | T    | 3195.5415 | 1598.2744       | 3178.5150 | 1589.7611        | 3177.5310      | 1589.2691        | 28 |
| 5  | 416.1776  | 208.5924        |           |                  | 398.1670       | 199.5872         | A    | 3094.4939 | 1547.7506       | 3077.4673 | 1539.2373        | 3076.4833      | 1538.7453        | 27 |
| 6  | 544.2362  | 272.6217        | 527.2096  | 264.1084         | 526.2256       | 263.6164         | Q    | 3023.4567 | 1512.2320       | 3006.4302 | 1503.7187        | 3005.4462      | 1503.2267        | 26 |
| 7  | 631.2682  | 316.1377        | 614.2416  | 307.6245         | 613.2576       | 307.1325         | S    | 2895.3982 | 1448.2027       | 2878.3716 | 1439.6894        | 2877.3876      | 1439.1974        | 25 |
| 8  | 702.3053  | 351.6563        | 685.2788  | 343.1430         | 684.2947       | 342.6510         | A    | 2808.3661 | 1404.6867       | 2791.3396 | 1396.1734        | 2790.3556      | 1395.6814        | 24 |
| 9  | 817.3323  | 409.1698        | 800.3057  | 400.6565         | 799.3217       | 400.1645         | D    | 2737.3290 | 1369.1682       | 2720.3025 | 1360.6549        | 2719.3185      | 1360.1629        | 23 |
| 10 | 914.3850  | 457.6961        | 897.3585  | 449.1829         | 896.3745       | 448.6909         | P    | 2622.3021 | 1311.6547       | 2605.2755 | 1303.1414        | 2604.2915      | 1302.6494        | 22 |
| 11 | 1043.4276 | 522.2174        | 1026.4011 | 513.7042         | 1025.4170      | 513.2122         | Q    | 2525.2493 | 1263.1283       | 2508.2228 | 1254.6150        | 2507.2388      | 1254.1230        | 21 |
| 12 | 1229.5069 | 615.2571        | 1212.4804 | 606.7438         | 1211.4964      | 606.2518         | W    | 2396.2067 | 1198.6070       | 2379.1802 | 1190.0937        | 2378.1962      | 1189.6017        | 20 |
| 13 | 1358.5495 | 679.7784        | 1341.5230 | 671.2651         | 1340.5390      | 670.7731         | E    | 2210.1274 | 1105.5673       | 2193.1009 | 1097.0541        | 2192.1168      | 1096.5621        | 19 |
| 14 | 1486.6081 | 743.8077        | 1469.5815 | 735.2944         | 1468.5975      | 734.8024         | Q    | 2081.0848 | 1041.0460       | 2064.0583 | 1032.5328        | 2063.0743      | 1032.0408        | 18 |
| 15 | 1599.6922 | 800.3497        | 1582.6656 | 791.8364         | 1581.6816      | 791.3444         | L    | 1953.0262 | 977.0168        | 1935.9997 | 968.5035         | 1935.0157      | 968.0115         | 17 |
| 16 | 1713.7351 | 857.3712        | 1696.7085 | 848.8579         | 1695.7245      | 848.3659         | N    | 1839.9422 | 920.4747        | 1822.9156 | 911.9615         | 1821.9316      | 911.4694         | 16 |
| 17 | 1827.7780 | 914.3926        | 1810.7515 | 905.8794         | 1809.7674      | 905.3874         | N    | 1725.8993 | 863.4533        | 1708.8727 | 854.9400         | 1707.8887      | 854.4480         | 15 |
| 18 | 1955.8730 | 978.4401        | 1938.8464 | 969.9269         | 1937.8624      | 969.4348         | K    | 1611.8563 | 806.4318        | 1594.8298 | 797.9185         | 1593.8458      | 797.4265         | 14 |
| 19 | 2070.8999 | 1035.9536       | 2053.8734 | 1027.4403        | 2052.8894      | 1026.9483        | N    | 1483.7614 | 742.3843        | 1466.7348 | 733.8710         | 1465.7508      | 733.3790         | 13 |
| 20 | 2183.9840 | 1092.4956       | 2166.9574 | 1083.9824        | 2165.9734      | 1083.4903        | L    | 1368.7344 | 684.8708        | 1351.7079 | 676.3576         | 1350.7239      | 675.8656         | 12 |
| 21 | 2271.0160 | 1136.0116       | 2253.9895 | 1127.4984        | 2253.0054      | 1127.0064        | S    | 1255.6504 | 628.3288        | 1238.6238 | 619.8155         | 1237.6398      | 619.3235         | 11 |
| 22 | 2402.0565 | 1201.5319       | 2385.0299 | 1193.0186        | 2384.0459      | 1192.5266        | M    | 1168.6183 | 584.8128        | 1151.5918 | 576.2995         | 1150.6078      | 575.8075         | 10 |

|    |           |           |           |           |           |           |   |           |          |           |          |           |          |   |
|----|-----------|-----------|-----------|-----------|-----------|-----------|---|-----------|----------|-----------|----------|-----------|----------|---|
| 23 | 2499.1093 | 1250.0583 | 2482.0827 | 1241.5450 | 2481.0987 | 1241.0530 | P | 1037.5778 | 519.2926 | 1020.5513 | 510.7793 | 1019.5673 | 510.2873 | 9 |
| 24 | 2612.1933 | 1306.6003 | 2595.1668 | 1298.0870 | 2594.1828 | 1297.5950 | L | 940.5251  | 470.7662 | 923.4985  | 462.2529 | 922.5145  | 461.7609 | 8 |
| 25 | 2725.2774 | 1363.1423 | 2708.2508 | 1354.6291 | 2707.2668 | 1354.1370 | L | 827.4410  | 414.2241 | 810.4145  | 405.7109 | 809.4305  | 405.2189 | 7 |
| 26 | 2822.3302 | 1411.6687 | 2805.3036 | 1403.1554 | 2804.3196 | 1402.6634 | P | 714.3570  | 357.6821 | 697.3304  | 349.1688 | 696.3464  | 348.6768 | 6 |
| 27 | 2893.3673 | 1447.1873 | 2876.3407 | 1438.6740 | 2875.3567 | 1438.1820 | A | 617.3042  | 309.1557 | 600.2776  | 300.6425 | 599.2936  | 300.1504 | 5 |
| 28 | 3008.3942 | 1504.7007 | 2991.3677 | 1496.1875 | 2990.3836 | 1495.6955 | D | 546.2671  | 273.6372 | 529.2405  | 265.1239 | 528.2565  | 264.6319 | 4 |
| 29 | 3155.4626 | 1578.2349 | 3138.4361 | 1569.7217 | 3137.4521 | 1569.2297 | F | 431.2401  | 216.1237 | 414.2136  | 207.6104 |           |          | 3 |
| 30 | 3292.5215 | 1646.7644 | 3275.4950 | 1638.2511 | 3274.5110 | 1637.7591 | H | 284.1717  | 142.5895 | 267.1452  | 134.0762 |           |          | 2 |
| 31 |           |           |           |           |           |           | K | 147.1128  | 74.0600  | 130.0863  | 65.5468  |           |          | 1 |

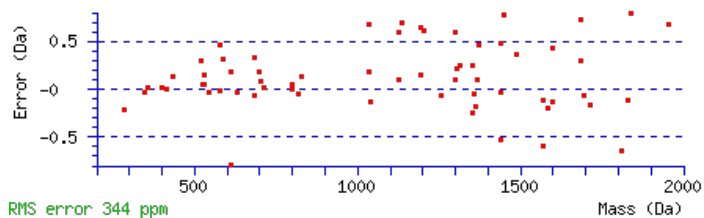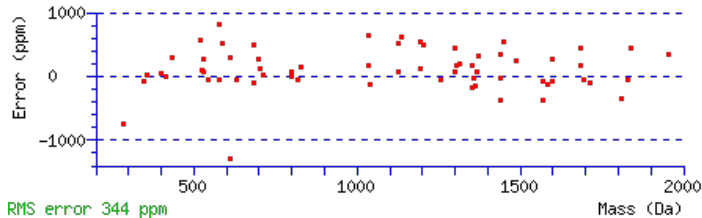

NCBI BLAST search of [GGETAQSADPQWEQLNKNLSMPLLPADFHK](#)  
 (Parameters: blastp, nr protein database, expect=20000, no filter, PAM30)  
 Other BLAST [web gateways](#)

All matches to this query

| Score | Mr(calc)  | Delta  | Sequence                                       | Site Analysis              |
|-------|-----------|--------|------------------------------------------------|----------------------------|
| 47.1  | 3437.6197 | 0.0116 | <a href="#">GGETAQSADPQWEQLNKNLSMPLLPADFHK</a> | Deamidated Q11, N19 31.55% |
| 44.2  | 3437.6197 | 0.0116 | <a href="#">GGETAQSADPQWEQLNKNLSMPLLPADFHK</a> | Deamidated N16, N19 16.40% |
| 43.4  | 3437.6197 | 0.0116 | <a href="#">GGETAQSADPQWEQLNKNLSMPLLPADFHK</a> | Deamidated Q14, N19 13.68% |
| 41.5  | 3437.6197 | 0.0116 | <a href="#">GGETAQSADPQWEQLNKNLSMPLLPADFHK</a> | Deamidated Q11, N17 8.67%  |
| 39.2  | 3437.6197 | 0.0116 | <a href="#">GGETAQSADPQWEQLNKNLSMPLLPADFHK</a> | Deamidated N16, N17 5.18%  |
| 39.2  | 3437.6197 | 0.0116 | <a href="#">GGETAQSADPQWEQLNKNLSMPLLPADFHK</a> | Deamidated N17, N19 5.18%  |
| 38.2  | 3437.6197 | 0.0116 | <a href="#">GGETAQSADPQWEQLNKNLSMPLLPADFHK</a> | Deamidated Q14, N17 4.12%  |
| 37.2  | 3437.6197 | 0.0116 | <a href="#">GGETAQSADPQWEQLNKNLSMPLLPADFHK</a> | Deamidated Q14, N16 3.27%  |
| 35.5  | 3437.6197 | 0.0116 | <a href="#">GGETAQSADPQWEQLNKNLSMPLLPADFHK</a> | Deamidated Q11, N16 2.20%  |
| 35.2  | 3436.6357 | 0.9956 | <a href="#">GGETAQSADPQWEQLNKNLSMPLLPADFHK</a> |                            |

Mascot: <http://www.matrixscience.com/>

# MATRIX SCIENCE Mascot Search Results

## Peptide View

MS/MS Fragmentation of **GGETAQSADPQWEQLNKNLSMPLLPADFHK**

Found in **P05546** in **con\_Xuniprot\_HUMAN3**, HEP2\_HUMAN Heparin cofactor 2 OS=Homo sapiens GN=SERPIND1 PE=1 SV=3

Match to Query 27734: 3437.628256 from(860.414340,4+) intensity(78495.5156) rtinseconds(1935) scans(4953) index(22699)

Title: 111019\_Est\_MI\_YS\_G\_03Spectrum4332\_scans\_\_4953

Data file C:\mascot\20140703\_Tmgf\_1D\CSV\_UseAnalysis\MasterCSV\All\_Glyco\mgf\ptm\UC18ERLIC\_PTM\_35D.mgf

Click mouse within plot area to zoom in by factor of two about that point

Or, to Da

Label all possible matches Label matches used for scoring

Show Y-axis

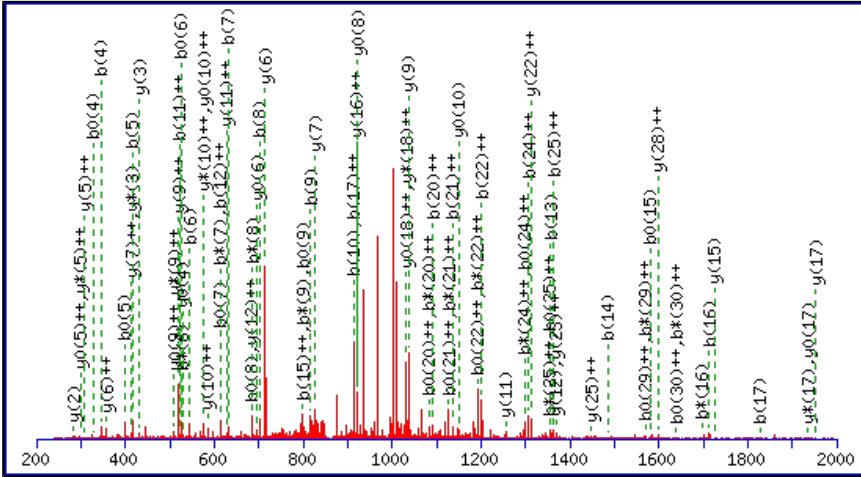

Monoisotopic mass of neutral peptide Mr(calc): 3437.6197

Fixed modifications: Carbamidomethyl (C) (apply to specified residues or termini only)

Variable modifications:

Q14 : Deamidated (NQ)

N19 : Deamidated (NQ)

Ions Score: 46 Expect: 0.0057

Matches : 82/340 fragment ions using 180 most intense peaks ([help](#))

| #  | b                | b <sup>++</sup>  | b*               | b <sup>*++</sup> | b <sup>0</sup>   | b <sup>0++</sup> | Seq. | y                | y <sup>++</sup>  | y*               | y <sup>*++</sup> | y <sup>0</sup>   | y <sup>0++</sup> | #  |
|----|------------------|------------------|------------------|------------------|------------------|------------------|------|------------------|------------------|------------------|------------------|------------------|------------------|----|
| 1  | 58.0287          | 29.5180          |                  |                  |                  |                  | G    |                  |                  |                  |                  |                  |                  | 31 |
| 2  | 115.0502         | 58.0287          |                  |                  |                  |                  | G    | 3381.6056        | 1691.3064        | 3364.5790        | 1682.7932        | 3363.5950        | 1682.3012        | 30 |
| 3  | 244.0928         | 122.5500         |                  |                  | 226.0822         | 113.5448         | E    | 3324.5841        | 1662.7957        | 3307.5576        | 1654.2824        | 3306.5736        | 1653.7904        | 29 |
| 4  | <b>345.1405</b>  | 173.0739         |                  |                  | <b>327.1299</b>  | 164.0686         | T    | 3195.5415        | <b>1598.2744</b> | 3178.5150        | 1589.7611        | 3177.5310        | 1589.2691        | 28 |
| 5  | <b>416.1776</b>  | 208.5924         |                  |                  | <b>398.1670</b>  | 199.5872         | A    | 3094.4939        | 1547.7506        | 3077.4673        | 1539.2373        | 3076.4833        | 1538.7453        | 27 |
| 6  | <b>544.2362</b>  | 272.6217         | <b>527.2096</b>  | 264.1084         | <b>526.2256</b>  | 263.6164         | Q    | 3023.4567        | 1512.2320        | 3006.4302        | 1503.7187        | 3005.4462        | 1503.2267        | 26 |
| 7  | <b>631.2682</b>  | 316.1377         | <b>614.2416</b>  | 307.6245         | <b>613.2576</b>  | 307.1325         | S    | 2895.3982        | <b>1448.2027</b> | 2878.3716        | 1439.6894        | 2877.3876        | 1439.1974        | 25 |
| 8  | <b>702.3053</b>  | 351.6563         | <b>685.2788</b>  | 343.1430         | <b>684.2947</b>  | 342.6510         | A    | 2808.3661        | 1404.6867        | 2791.3396        | 1396.1734        | 2790.3556        | 1395.6814        | 24 |
| 9  | <b>817.3323</b>  | 409.1698         | <b>800.3057</b>  | 400.6565         | <b>799.3217</b>  | 400.1645         | D    | 2737.3290        | <b>1369.1682</b> | 2720.3025        | 1360.6549        | 2719.3185        | 1360.1629        | 23 |
| 10 | <b>914.3850</b>  | 457.6961         | 897.3585         | 449.1829         | 896.3745         | 448.6909         | P    | 2622.3021        | <b>1311.6547</b> | 2605.2755        | 1303.1414        | 2604.2915        | 1302.6494        | 22 |
| 11 | 1042.4436        | <b>521.7254</b>  | 1025.4170        | 513.2122         | 1024.4330        | 512.7202         | Q    | 2525.2493        | 1263.1283        | 2508.2228        | 1254.6150        | 2507.2388        | 1254.1230        | 21 |
| 12 | 1228.5229        | <b>614.7651</b>  | 1211.4964        | 606.2518         | 1210.5123        | 605.7598         | W    | 2397.1907        | 1199.0990        | 2380.1642        | 1190.5857        | 2379.1802        | 1190.0937        | 20 |
| 13 | <b>1357.5655</b> | 679.2864         | 1340.5390        | 670.7731         | 1339.5549        | 670.2811         | E    | 2211.1114        | 1106.0594        | 2194.0849        | 1097.5461        | 2193.1009        | 1097.0541        | 19 |
| 14 | <b>1486.6081</b> | 743.8077         | 1469.5815        | 735.2944         | 1468.5975        | 734.8024         | Q    | 2082.0688        | 1041.5381        | 2065.0423        | <b>1033.0248</b> | 2064.0583        | <b>1032.5328</b> | 18 |
| 15 | 1599.6922        | <b>800.3497</b>  | 1582.6656        | 791.8364         | <b>1581.6816</b> | 791.3444         | L    | <b>1953.0262</b> | 977.0168         | <b>1935.9997</b> | 968.5035         | <b>1935.0157</b> | 968.0115         | 17 |
| 16 | <b>1713.7351</b> | 857.3712         | <b>1696.7085</b> | 848.8579         | 1695.7245        | 848.3659         | N    | 1839.9422        | <b>920.4747</b>  | 1822.9156        | 911.9615         | 1821.9316        | 911.4694         | 16 |
| 17 | <b>1827.7780</b> | <b>914.3926</b>  | 1810.7515        | 905.8794         | 1809.7674        | 905.3874         | N    | <b>1725.8993</b> | 863.4533         | 1708.8727        | 854.9400         | 1707.8887        | 854.4480         | 15 |
| 18 | 1955.8730        | 978.4401         | 1938.8464        | 969.9269         | 1937.8624        | 969.4348         | K    | 1611.8563        | 806.4318         | 1594.8298        | 797.9185         | 1593.8458        | 797.4265         | 14 |
| 19 | 2070.8999        | 1035.9536        | 2053.8734        | 1027.4403        | 2052.8894        | 1026.9483        | N    | 1483.7614        | 742.3843         | 1466.7348        | 733.8710         | 1465.7508        | 733.3790         | 13 |
| 20 | 2183.9840        | <b>1092.4956</b> | 2166.9574        | <b>1083.9824</b> | 2165.9734        | <b>1083.4903</b> | L    | <b>1368.7344</b> | <b>684.8708</b>  | 1351.7079        | 676.3576         | 1350.7239        | 675.8656         | 12 |
| 21 | 2271.0160        | <b>1136.0116</b> | 2253.9895        | <b>1127.4984</b> | 2253.0054        | <b>1127.0064</b> | S    | <b>1255.6504</b> | <b>628.3288</b>  | 1238.6238        | 619.8155         | 1237.6398        | 619.3235         | 11 |
| 22 | 2402.0565        | <b>1201.5319</b> | 2385.0299        | <b>1193.0186</b> | 2384.0459        | <b>1192.5266</b> | M    | 1168.6183        | <b>584.8128</b>  | 1151.5918        | <b>576.2995</b>  | <b>1150.6078</b> | <b>575.8075</b>  | 10 |

|    |           |           |           |           |           |           |   |           |          |           |          |           |          |   |
|----|-----------|-----------|-----------|-----------|-----------|-----------|---|-----------|----------|-----------|----------|-----------|----------|---|
| 23 | 2499.1093 | 1250.0583 | 2482.0827 | 1241.5450 | 2481.0987 | 1241.0530 | P | 1037.5778 | 519.2926 | 1020.5513 | 510.7793 | 1019.5673 | 510.2873 | 9 |
| 24 | 2612.1933 | 1306.6003 | 2595.1668 | 1298.0870 | 2594.1828 | 1297.5950 | L | 940.5251  | 470.7662 | 923.4985  | 462.2529 | 922.5145  | 461.7609 | 8 |
| 25 | 2725.2774 | 1363.1423 | 2708.2508 | 1354.6291 | 2707.2668 | 1354.1370 | L | 827.4410  | 414.2241 | 810.4145  | 405.7109 | 809.4305  | 405.2189 | 7 |
| 26 | 2822.3302 | 1411.6687 | 2805.3036 | 1403.1554 | 2804.3196 | 1402.6634 | P | 714.3570  | 357.6821 | 697.3304  | 349.1688 | 696.3464  | 348.6768 | 6 |
| 27 | 2893.3673 | 1447.1873 | 2876.3407 | 1438.6740 | 2875.3567 | 1438.1820 | A | 617.3042  | 309.1557 | 600.2776  | 300.6425 | 599.2936  | 300.1504 | 5 |
| 28 | 3008.3942 | 1504.7007 | 2991.3677 | 1496.1875 | 2990.3836 | 1495.6955 | D | 546.2671  | 273.6372 | 529.2405  | 265.1239 | 528.2565  | 264.6319 | 4 |
| 29 | 3155.4626 | 1578.2349 | 3138.4361 | 1569.7217 | 3137.4521 | 1569.2297 | F | 431.2401  | 216.1237 | 414.2136  | 207.6104 |           |          | 3 |
| 30 | 3292.5215 | 1646.7644 | 3275.4950 | 1638.2511 | 3274.5110 | 1637.7591 | H | 284.1717  | 142.5895 | 267.1452  | 134.0762 |           |          | 2 |
| 31 |           |           |           |           |           |           | K | 147.1128  | 74.0600  | 130.0863  | 65.5468  |           |          | 1 |

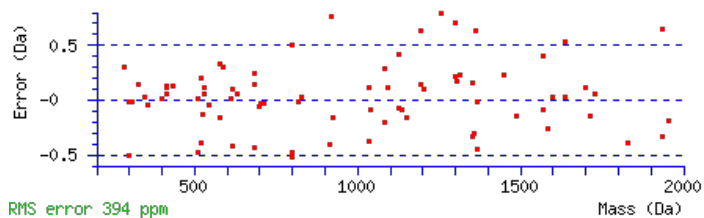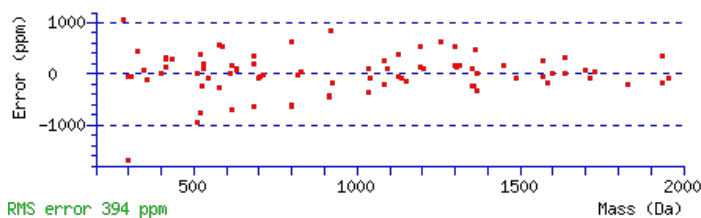

NCBI BLAST search of [GGETAQSADPQWEQLNKNLSMPLLPADFHK](#)  
 (Parameters: blastp, nr protein database, expect=20000, no filter, PAM30)  
 Other BLAST [web gateways](#)

All matches to this query

| Score | Mr(calc)  | Delta  | Sequence                                       | Site Analysis              |
|-------|-----------|--------|------------------------------------------------|----------------------------|
| 46.3  | 3437.6197 | 0.0085 | <a href="#">GGETAQSADPQWEQLNKNLSMPLLPADFHK</a> | Deamidated Q14, N19 14.62% |
| 46.2  | 3436.6357 | 0.9925 | <a href="#">GGETAQSADPQWEQLNKNLSMPLLPADFHK</a> |                            |
| 46.0  | 3437.6197 | 0.0085 | <a href="#">GGETAQSADPQWEQLNKNLSMPLLPADFHK</a> | Deamidated N16, N19 13.70% |
| 45.8  | 3437.6197 | 0.0085 | <a href="#">GGETAQSADPQWEQLNKNLSMPLLPADFHK</a> | Deamidated Q11, N19 13.03% |
| 45.4  | 3436.6357 | 0.9925 | <a href="#">GGETAQSADPQWEQLNKNLSMPLLPADFHK</a> |                            |
| 45.3  | 3436.6357 | 0.9925 | <a href="#">GGETAQSADPQWEQLNKNLSMPLLPADFHK</a> |                            |
| 44.3  | 3437.6197 | 0.0085 | <a href="#">GGETAQSADPQWEQLNKNLSMPLLPADFHK</a> | Deamidated N17, N19 9.16%  |
| 42.6  | 3437.6197 | 0.0085 | <a href="#">GGETAQSADPQWEQLNKNLSMPLLPADFHK</a> | Deamidated N16, N17 6.28%  |
| 42.2  | 3437.6197 | 0.0085 | <a href="#">GGETAQSADPQWEQLNKNLSMPLLPADFHK</a> | Deamidated Q14, N17 5.69%  |
| 41.7  | 3437.6197 | 0.0085 | <a href="#">GGETAQSADPQWEQLNKNLSMPLLPADFHK</a> | Deamidated Q11, N17 5.10%  |

Mascot: <http://www.matrixscience.com/>

# MATRIX SCIENCE Mascot Search Results

## Peptide View

MS/MS Fragmentation of **GGETAQSADPQWEQLNKNLSMPLLPADFHK**

Found in **P05546** in **con\_Xuniprot\_HUMAN3**, HEP2\_HUMAN Heparin cofactor 2 OS=Homo sapiens GN=SERPIND1 PE=1 SV=3

Match to Query 27738: 3437.632536 from(860.415410,4+) intensity(186124.4844) rtinseconds(2032) scans(4935) index(9036)

Title: 111019\_Est\_ISCardio\_NMI\_YS\_G\_4Spectrum4238\_scans\_\_4935

Data file C:\mascot\20140703\_Tmgf\_1D\CSV\_UseAnalysis\MasterCSV\All\_Glyco\mgf\ptm\UC18ERLIC\_PTM\_35D.mgf

Click mouse within plot area to zoom in by factor of two about that point

Or, to Da

Label all possible matches Label matches used for scoring

Show Y-axis

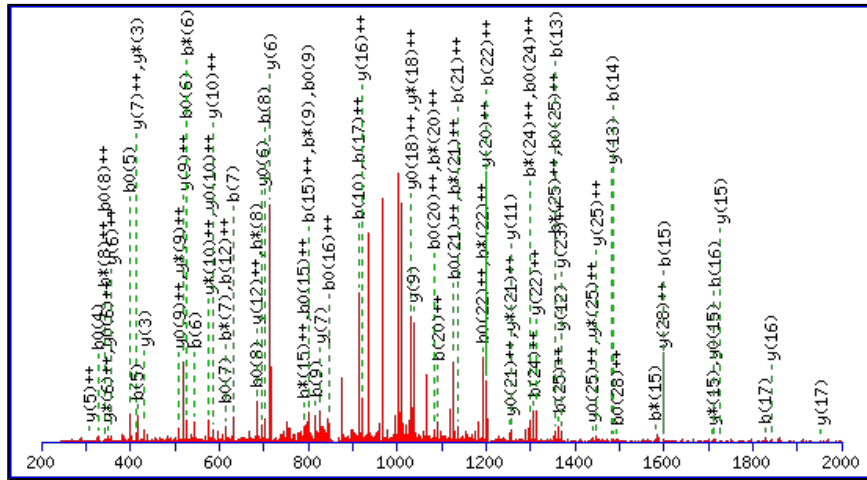

Monoisotopic mass of neutral peptide Mr(calc): 3437.6197

Fixed modifications: Carbamidomethyl (C) (apply to specified residues or termini only)

Variable modifications:

N17 : Deamidated (NQ)

N19 : Deamidated (NQ)

Ions Score: 45 Expect: 0.0079

Matches : 84/340 fragment ions using 162 most intense peaks ([help](#))

| #  | b         | b <sup>++</sup> | b <sup>*</sup> | b <sup>*++</sup> | b <sup>0</sup> | b <sup>0++</sup> | Seq. | y         | y <sup>++</sup> | y <sup>*</sup> | y <sup>*++</sup> | y <sup>0</sup> | y <sup>0++</sup> | #  |
|----|-----------|-----------------|----------------|------------------|----------------|------------------|------|-----------|-----------------|----------------|------------------|----------------|------------------|----|
| 1  | 58.0287   | 29.5180         |                |                  |                |                  | G    |           |                 |                |                  |                |                  | 31 |
| 2  | 115.0502  | 58.0287         |                |                  |                |                  | G    | 3381.6056 | 1691.3064       | 3364.5790      | 1682.7932        | 3363.5950      | 1682.3012        | 30 |
| 3  | 244.0928  | 122.5500        |                |                  | 226.0822       | 113.5448         | E    | 3324.5841 | 1662.7957       | 3307.5576      | 1654.2824        | 3306.5736      | 1653.7904        | 29 |
| 4  | 345.1405  | 173.0739        |                |                  | 327.1299       | 164.0686         | T    | 3195.5415 | 1598.2744       | 3178.5150      | 1589.7611        | 3177.5310      | 1589.2691        | 28 |
| 5  | 416.1776  | 208.5924        |                |                  | 398.1670       | 199.5872         | A    | 3094.4939 | 1547.7506       | 3077.4673      | 1539.2373        | 3076.4833      | 1538.7453        | 27 |
| 6  | 544.2362  | 272.6217        | 527.2096       | 264.1084         | 526.2256       | 263.6164         | Q    | 3023.4567 | 1512.2320       | 3006.4302      | 1503.7187        | 3005.4462      | 1503.2267        | 26 |
| 7  | 631.2682  | 316.1377        | 614.2416       | 307.6245         | 613.2576       | 307.1325         | S    | 2895.3982 | 1448.2027       | 2878.3716      | 1439.6894        | 2877.3876      | 1439.1974        | 25 |
| 8  | 702.3053  | 351.6563        | 685.2788       | 343.1430         | 684.2947       | 342.6510         | A    | 2808.3661 | 1404.6867       | 2791.3396      | 1396.1734        | 2790.3556      | 1395.6814        | 24 |
| 9  | 817.3323  | 409.1698        | 800.3057       | 400.6565         | 799.3217       | 400.1645         | D    | 2737.3290 | 1369.1682       | 2720.3025      | 1360.6549        | 2719.3185      | 1360.1629        | 23 |
| 10 | 914.3850  | 457.6961        | 897.3585       | 449.1829         | 896.3745       | 448.6909         | P    | 2622.3021 | 1311.6547       | 2605.2755      | 1303.1414        | 2604.2915      | 1302.6494        | 22 |
| 11 | 1042.4436 | 521.7254        | 1025.4170      | 513.2122         | 1024.4330      | 512.7202         | Q    | 2525.2493 | 1263.1283       | 2508.2228      | 1254.6150        | 2507.2388      | 1254.1230        | 21 |
| 12 | 1228.5229 | 614.7651        | 1211.4964      | 606.2518         | 1210.5123      | 605.7598         | W    | 2397.1907 | 1199.0990       | 2380.1642      | 1190.5857        | 2379.1802      | 1190.0937        | 20 |
| 13 | 1357.5655 | 679.2864        | 1340.5390      | 670.7731         | 1339.5549      | 670.2811         | E    | 2211.1114 | 1106.0594       | 2194.0849      | 1097.5461        | 2193.1009      | 1097.0541        | 19 |
| 14 | 1485.6241 | 743.3157        | 1468.5975      | 734.8024         | 1467.6135      | 734.3104         | Q    | 2082.0688 | 1041.5381       | 2065.0423      | 1033.0248        | 2064.0583      | 1032.5328        | 18 |
| 15 | 1598.7081 | 799.8577        | 1581.6816      | 791.3444         | 1580.6976      | 790.8524         | L    | 1954.0103 | 977.5088        | 1936.9837      | 968.9955         | 1935.9997      | 968.5035         | 17 |
| 16 | 1712.7511 | 856.8792        | 1695.7245      | 848.3659         | 1694.7405      | 847.8739         | N    | 1840.9262 | 920.9667        | 1823.8996      | 912.4535         | 1822.9156      | 911.9615         | 16 |
| 17 | 1827.7780 | 914.3926        | 1810.7515      | 905.8794         | 1809.7674      | 905.3874         | N    | 1726.8833 | 863.9453        | 1709.8567      | 855.4320         | 1708.8727      | 854.9400         | 15 |
| 18 | 1955.8730 | 978.4401        | 1938.8464      | 969.9269         | 1937.8624      | 969.4348         | K    | 1611.8563 | 806.4318        | 1594.8298      | 797.9185         | 1593.8458      | 797.4265         | 14 |
| 19 | 2070.8999 | 1035.9536       | 2053.8734      | 1027.4403        | 2052.8894      | 1026.9483        | N    | 1483.7614 | 742.3843        | 1466.7348      | 733.8710         | 1465.7508      | 733.3790         | 13 |
| 20 | 2183.9840 | 1092.4956       | 2166.9574      | 1083.9824        | 2165.9734      | 1083.4903        | L    | 1368.7344 | 684.8708        | 1351.7079      | 676.3576         | 1350.7239      | 675.8656         | 12 |
| 21 | 2271.0160 | 1136.0116       | 2253.9895      | 1127.4984        | 2253.0054      | 1127.0064        | S    | 1255.6504 | 628.3288        | 1238.6238      | 619.8155         | 1237.6398      | 619.3235         | 11 |
| 22 | 2402.0565 | 1201.5319       | 2385.0299      | 1193.0186        | 2384.0459      | 1192.5266        | M    | 1168.6183 | 584.8128        | 1151.5918      | 576.2995         | 1150.6078      | 575.8075         | 10 |



|    |           |           |           |           |           |           |   |           |          |           |          |           |          |   |
|----|-----------|-----------|-----------|-----------|-----------|-----------|---|-----------|----------|-----------|----------|-----------|----------|---|
| 23 | 2499.1093 | 1250.0583 | 2482.0827 | 1241.5450 | 2481.0987 | 1241.0530 | P | 1037.5778 | 519.2926 | 1020.5513 | 510.7793 | 1019.5673 | 510.2873 | 9 |
| 24 | 2612.1933 | 1306.6003 | 2595.1668 | 1298.0870 | 2594.1828 | 1297.5950 | L | 940.5251  | 470.7662 | 923.4985  | 462.2529 | 922.5145  | 461.7609 | 8 |
| 25 | 2725.2774 | 1363.1423 | 2708.2508 | 1354.6291 | 2707.2668 | 1354.1370 | L | 827.4410  | 414.2241 | 810.4145  | 405.7109 | 809.4305  | 405.2189 | 7 |
| 26 | 2822.3302 | 1411.6687 | 2805.3036 | 1403.1554 | 2804.3196 | 1402.6634 | P | 714.3570  | 357.6821 | 697.3304  | 349.1688 | 696.3464  | 348.6768 | 6 |
| 27 | 2893.3673 | 1447.1873 | 2876.3407 | 1438.6740 | 2875.3567 | 1438.1820 | A | 617.3042  | 309.1557 | 600.2776  | 300.6425 | 599.2936  | 300.1504 | 5 |
| 28 | 3008.3942 | 1504.7007 | 2991.3677 | 1496.1875 | 2990.3836 | 1495.6955 | D | 546.2671  | 273.6372 | 529.2405  | 265.1239 | 528.2565  | 264.6319 | 4 |
| 29 | 3155.4626 | 1578.2349 | 3138.4361 | 1569.7217 | 3137.4521 | 1569.2297 | F | 431.2401  | 216.1237 | 414.2136  | 207.6104 |           |          | 3 |
| 30 | 3292.5215 | 1646.7644 | 3275.4950 | 1638.2511 | 3274.5110 | 1637.7591 | H | 284.1717  | 142.5895 | 267.1452  | 134.0762 |           |          | 2 |
| 31 |           |           |           |           |           |           | K | 147.1128  | 74.0600  | 130.0863  | 65.5468  |           |          | 1 |

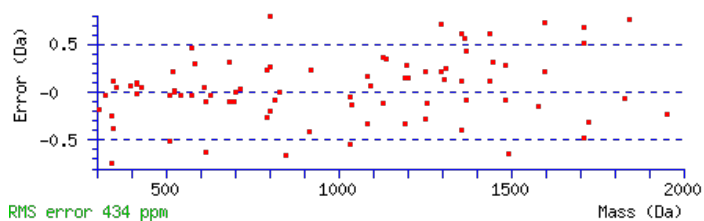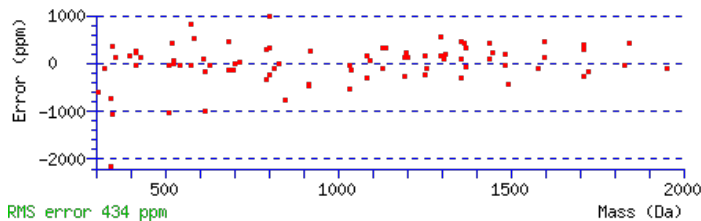

NCBI BLAST search of [GGETAQSADPQWEQLNKNLSMPLLPADFHK](#)  
 (Parameters: blastp, nr protein database, expect=20000, no filter, PAM30)  
 Other BLAST [web gateways](#)

All matches to this query

| Score | Mr(calc)  | Delta  | Sequence                                       | Site Analysis              |
|-------|-----------|--------|------------------------------------------------|----------------------------|
| 45.0  | 3437.6197 | 0.0128 | <a href="#">GGETAQSADPQWEQLNKNLSMPLLPADFHK</a> | Deamidated N17, N19 30.20% |
| 43.9  | 3437.6197 | 0.0128 | <a href="#">GGETAQSADPQWEQLNKNLSMPLLPADFHK</a> | Deamidated N16, N19 23.61% |
| 42.4  | 3437.6197 | 0.0128 | <a href="#">GGETAQSADPQWEQLNKNLSMPLLPADFHK</a> | Deamidated Q14, N19 16.87% |
| 40.2  | 3436.6357 | 0.9968 | <a href="#">GGETAQSADPQWEQLNKNLSMPLLPADFHK</a> |                            |
| 38.5  | 3436.6357 | 0.9968 | <a href="#">GGETAQSADPQWEQLNKNLSMPLLPADFHK</a> |                            |
| 38.3  | 3437.6197 | 0.0128 | <a href="#">GGETAQSADPQWEQLNKNLSMPLLPADFHK</a> | Deamidated Q11, N19 6.49%  |
| 37.9  | 3436.6357 | 0.9968 | <a href="#">GGETAQSADPQWEQLNKNLSMPLLPADFHK</a> |                            |
| 37.6  | 3437.6197 | 0.0128 | <a href="#">GGETAQSADPQWEQLNKNLSMPLLPADFHK</a> | Deamidated N16, N17 5.51%  |
| 34.4  | 3437.6197 | 0.0128 | <a href="#">GGETAQSADPQWEQLNKNLSMPLLPADFHK</a> | Deamidated Q14, N17 2.69%  |
| 33.1  | 3437.6197 | 0.0128 | <a href="#">GGETAQSADPQWEQLNKNLSMPLLPADFHK</a> | Deamidated Q14, N16 1.99%  |

Mascot: <http://www.matrixscience.com/>

# MASCOT SCIENCE Mascot Search Results

## Peptide View

MS/MS Fragmentation of **DFVNASSKYEITTIHNLFR**

Found in **P05546** in **con\_Xuniprot\_HUMAN3**, HEP2\_HUMAN Heparin cofactor 2 OS=Homo sapiens GN=SERPIND1 PE=1 SV=3

Match to Query 15112: 2255.126952 from(752.716260,3+) intensity(47865.0586) rtinseconds(2127) scans(5502) index(22734)

Title: 111019\_Est\_ML\_YS\_G\_03Spectrum4821\_scans\_\_5502

Data file C:\mascot\20140703\_Tmgf\_1D\CSV\_UseAnalysis\MasterCSV\All\_Glyco\mgf\ptm\UC18ERLIC\_PTM\_35D.mgf

Click mouse within plot area to zoom in by factor of two about that point

Or,  to  Da

Label all possible matches  Label matches used for scoring

Show Y-axis

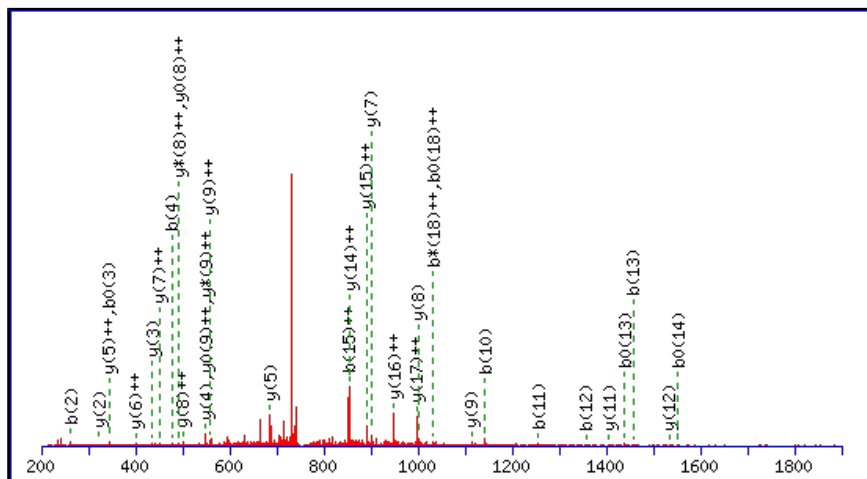

Monoisotopic mass of neutral peptide Mr(calc): 2255.1222

Fixed modifications: Carbamidomethyl (C) (apply to specified residues or termini only)

Variable modifications:

N4 : Deamidated (NQ)

Ions Score: 39 Expect: 0.033

Matches : 34/198 fragment ions using 82 most intense peaks ([help](#))

| #  | b                | b <sup>++</sup> | b <sup>*</sup> | b <sup>*++</sup> | b <sup>0</sup>   | b <sup>0++</sup> | Seq. | y                | y <sup>++</sup> | y <sup>*</sup> | y <sup>*++</sup> | y <sup>0</sup> | y <sup>0++</sup> | #  |
|----|------------------|-----------------|----------------|------------------|------------------|------------------|------|------------------|-----------------|----------------|------------------|----------------|------------------|----|
| 1  | 116.0342         | 58.5207         |                |                  | 98.0237          | 49.5155          | D    |                  |                 |                |                  |                |                  | 19 |
| 2  | <b>263.1026</b>  | 132.0550        |                |                  | 245.0921         | 123.0497         | F    | 2141.1026        | 1071.0549       | 2124.0760      | 1062.5417        | 2123.0920      | 1062.0496        | 18 |
| 3  | 362.1710         | 181.5892        |                |                  | <b>344.1605</b>  | 172.5839         | V    | 1994.0342        | <b>997.5207</b> | 1977.0076      | 989.0074         | 1976.0236      | 988.5154         | 17 |
| 4  | <b>477.1980</b>  | 239.1026        | 460.1714       | 230.5894         | 459.1874         | 230.0974         | N    | 1894.9658        | <b>947.9865</b> | 1877.9392      | 939.4732         | 1876.9552      | 938.9812         | 16 |
| 5  | 548.2351         | 274.6212        | 531.2086       | 266.1079         | 530.2245         | 265.6159         | A    | 1779.9388        | <b>890.4730</b> | 1762.9123      | 881.9598         | 1761.9282      | 881.4678         | 15 |
| 6  | 635.2671         | 318.1372        | 618.2406       | 309.6239         | 617.2566         | 309.1319         | S    | 1708.9017        | <b>854.9545</b> | 1691.8751      | 846.4412         | 1690.8911      | 845.9492         | 14 |
| 7  | 722.2992         | 361.6532        | 705.2726       | 353.1399         | 704.2886         | 352.6479         | S    | 1621.8697        | 811.4385        | 1604.8431      | 802.9252         | 1603.8591      | 802.4332         | 13 |
| 8  | 850.3941         | 425.7007        | 833.3676       | 417.1874         | 832.3836         | 416.6954         | K    | <b>1534.8376</b> | 767.9225        | 1517.8111      | 759.4092         | 1516.8271      | 758.9172         | 12 |
| 9  | 1013.4575        | 507.2324        | 996.4309       | 498.7191         | 995.4469         | 498.2271         | Y    | <b>1406.7427</b> | 703.8750        | 1389.7161      | 695.3617         | 1388.7321      | 694.8697         | 11 |
| 10 | <b>1142.5000</b> | 571.7537        | 1125.4735      | 563.2404         | 1124.4895        | 562.7484         | E    | 1243.6793        | 622.3433        | 1226.6528      | 613.8300         | 1225.6688      | 613.3380         | 10 |
| 11 | <b>1255.5841</b> | 628.2957        | 1238.5576      | 619.7824         | 1237.5735        | 619.2904         | I    | <b>1114.6368</b> | <b>557.8220</b> | 1097.6102      | <b>549.3087</b>  | 1096.6262      | <b>548.8167</b>  | 9  |
| 12 | <b>1356.6318</b> | 678.8195        | 1339.6052      | 670.3063         | 1338.6212        | 669.8142         | T    | <b>1001.5527</b> | <b>501.2800</b> | 984.5261       | <b>492.7667</b>  | 983.5421       | <b>492.2747</b>  | 8  |
| 13 | <b>1457.6795</b> | 729.3434        | 1440.6529      | 720.8301         | <b>1439.6689</b> | 720.3381         | T    | <b>900.5050</b>  | <b>450.7561</b> | 883.4785       | 442.2429         | 882.4944       | 441.7509         | 7  |
| 14 | 1570.7635        | 785.8854        | 1553.7370      | 777.3721         | <b>1552.7530</b> | 776.8801         | I    | 799.4573         | <b>400.2323</b> | 782.4308       | 391.7190         |                |                  | 6  |
| 15 | 1707.8224        | <b>854.4149</b> | 1690.7959      | 845.9016         | 1689.8119        | 845.4096         | H    | <b>686.3733</b>  | <b>343.6903</b> | 669.3467       | 335.1770         |                |                  | 5  |
| 16 | 1821.8654        | 911.4363        | 1804.8388      | 902.9230         | 1803.8548        | 902.4310         | N    | <b>549.3144</b>  | 275.1608        | 532.2878       | 266.6475         |                |                  | 4  |
| 17 | 1934.9494        | 967.9784        | 1917.9229      | 959.4651         | 1916.9389        | 958.9731         | L    | <b>435.2714</b>  | 218.1394        | 418.2449       | 209.6261         |                |                  | 3  |
| 18 | 2082.0178        | 1041.5126       | 2064.9913      | <b>1032.9993</b> | 2064.0073        | <b>1032.5073</b> | F    | <b>322.1874</b>  | 161.5973        | 305.1608       | 153.0840         |                |                  | 2  |
| 19 |                  |                 |                |                  |                  |                  | R    | 175.1190         | 88.0631         | 158.0924       | 79.5498          |                |                  | 1  |



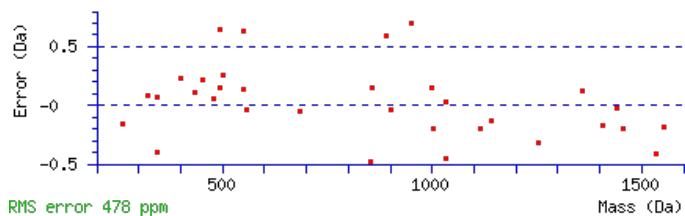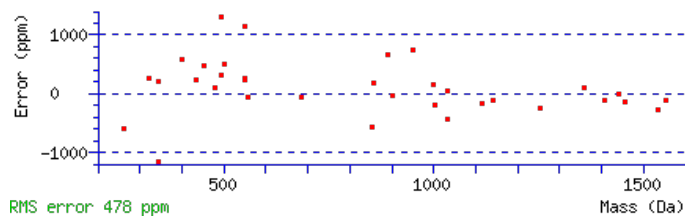

NCBI BLAST search of [DFVNASSKYEITTIHNLFR](#)

(Parameters: blastp, nr protein database, expect=20000, no filter, PAM30)

Other BLAST [web gateways](#)

**All matches to this query**

| Score | Mr(calc)  | Delta   | Sequence                               | Site Analysis        |
|-------|-----------|---------|----------------------------------------|----------------------|
| 39.2  | 2255.1222 | 0.0047  | <a href="#">DFVNASSKYEITTIHNLFR</a>    | Deamidated N4 98.51% |
| 21.0  | 2255.1222 | 0.0047  | <a href="#">DFVNASSKYEITTIHNLFR</a>    | Deamidated N16 1.49% |
| 11.5  | 2253.1310 | 1.9959  | <a href="#">QETEKNHCDIAIEELILAK</a>    |                      |
| 6.3   | 2255.1330 | -0.0060 | <a href="#">TLRDMAIICFAVFTEPNLK</a>    |                      |
| 5.4   | 2253.1138 | 2.0132  | <a href="#">LTEQLTQAFSALRHGDSHNK</a>   |                      |
| 3.7   | 2253.1133 | 2.0137  | <a href="#">TQIHIMPDTPEIMLARQNK</a>    |                      |
| 3.7   | 2253.1133 | 2.0137  | <a href="#">TQIHIMPDTPEIMLARQNK</a>    |                      |
| 2.7   | 2255.1369 | -0.0099 | <a href="#">HTEALLDAARGTGECVVVPDK</a>  |                      |
| 2.1   | 2254.1151 | 1.0119  | <a href="#">MRELKQNQELEGLPOPGLAT</a>   |                      |
| 1.4   | 2254.1328 | 0.9941  | <a href="#">TAPPVTNNSEIQASEVLVAADK</a> |                      |

Mascot: <http://www.matrixscience.com/>

# MASCOT SCIENCE Mascot Search Results

## Peptide View

MS/MS Fragmentation of **AATPAAVTCQLSNWSEWTD CFCPCQDKK**

Found in **P07357** in **con\_Xuniprot\_HUMAN3**, CO8A\_HUMAN Complement component C8 alpha chain OS=Homo sapiens GN=C8A PE=1 SV=2

Match to Query 27337: 3171.375672 from(1058.132500,3+) intensity(12581.0137) rtinseconds(2152) scans(5568) index(24769)

Title: 111019\_Est\_MI\_YS\_G\_06Spectrum4844\_scans\_\_5568

Data file C:\mascot\20140703\_Tmgf\_1D\CSV\_UseAnalysis\MasterCSV\All\_Glyco\mgf\ptm\UC18ERLIC\_PTM\_35D.mgf

Click mouse within plot area to zoom in by factor of two about that point

Or, to Da

Label all possible matches Label matches used for scoring

Show Y-axis

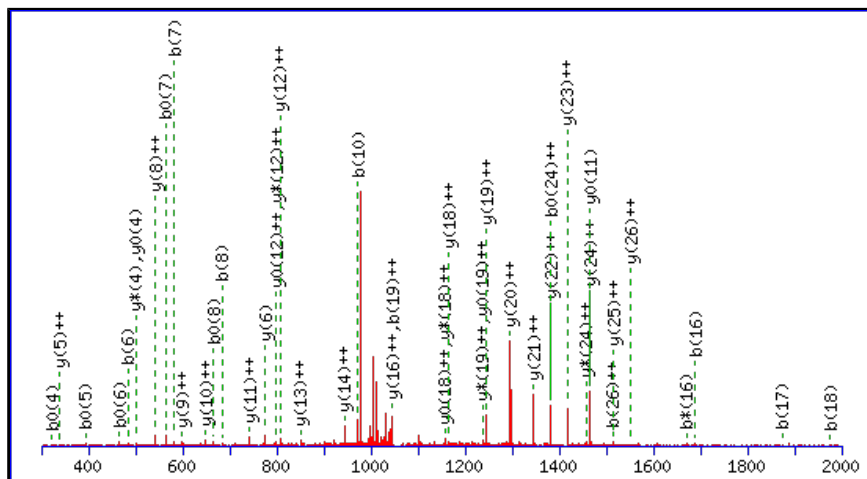

Monoisotopic mass of neutral peptide  $M_r(\text{calc})$ : 3171.3736

Fixed modifications: Carbamidomethyl (C) (apply to specified residues or termini only)

Variable modifications:

N13 : Deamidated (NQ)

Ions Score: 80 Expect: 7.2e-007

Matches : 45/286 fragment ions using 85 most intense peaks ([help](#))

| #  | b         | b <sup>++</sup> | b <sup>*</sup> | b <sup>*++</sup> | b <sup>0</sup> | b <sup>0++</sup> | Seq. | y         | y <sup>++</sup> | y <sup>*</sup> | y <sup>*++</sup> | y <sup>0</sup> | y <sup>0++</sup> | #  |
|----|-----------|-----------------|----------------|------------------|----------------|------------------|------|-----------|-----------------|----------------|------------------|----------------|------------------|----|
| 1  | 72.0444   | 36.5258         |                |                  |                |                  | A    |           |                 |                |                  |                |                  | 27 |
| 2  | 143.0815  | 72.0444         |                |                  |                |                  | A    | 3101.3438 | 1551.1755       | 3084.3172      | 1542.6622        | 3083.3332      | 1542.1702        | 26 |
| 3  | 244.1292  | 122.5682        |                |                  | 226.1186       | 113.5629         | T    | 3030.3067 | 1515.6570       | 3013.2801      | 1507.1437        | 3012.2961      | 1506.6517        | 25 |
| 4  | 341.1819  | 171.0946        |                |                  | 323.1714       | 162.0893         | P    | 2929.2590 | 1465.1331       | 2912.2324      | 1456.6199        | 2911.2484      | 1456.1278        | 24 |
| 5  | 412.2191  | 206.6132        |                |                  | 394.2085       | 197.6079         | A    | 2832.2062 | 1416.6067       | 2815.1797      | 1408.0935        | 2814.1957      | 1407.6015        | 23 |
| 6  | 483.2562  | 242.1317        |                |                  | 465.2456       | 233.1264         | A    | 2761.1691 | 1381.0882       | 2744.1426      | 1372.5749        | 2743.1585      | 1372.0829        | 22 |
| 7  | 582.3246  | 291.6659        |                |                  | 564.3140       | 282.6606         | V    | 2690.1320 | 1345.5696       | 2673.1054      | 1337.0564        | 2672.1214      | 1336.5643        | 21 |
| 8  | 683.3723  | 342.1898        |                |                  | 665.3617       | 333.1845         | T    | 2591.0636 | 1296.0354       | 2574.0370      | 1287.5222        | 2573.0530      | 1287.0301        | 20 |
| 9  | 843.4029  | 422.2051        |                |                  | 825.3924       | 413.1998         | C    | 2490.0159 | 1245.5116       | 2472.9893      | 1236.9983        | 2472.0053      | 1236.5063        | 19 |
| 10 | 971.4615  | 486.2344        | 954.4349       | 477.7211         | 953.4509       | 477.2291         | Q    | 2329.9852 | 1165.4963       | 2312.9587      | 1156.9830        | 2311.9747      | 1156.4910        | 18 |
| 11 | 1084.5456 | 542.7764        | 1067.5190      | 534.2631         | 1066.5350      | 533.7711         | L    | 2201.9267 | 1101.4670       | 2184.9001      | 1092.9537        | 2183.9161      | 1092.4617        | 17 |
| 12 | 1171.5776 | 586.2924        | 1154.5510      | 577.7792         | 1153.5670      | 577.2871         | S    | 2088.8426 | 1044.9249       | 2071.8161      | 1036.4117        | 2070.8320      | 1035.9197        | 16 |
| 13 | 1286.6045 | 643.8059        | 1269.5780      | 635.2926         | 1268.5940      | 634.8006         | N    | 2001.8106 | 1001.4089       | 1984.7840      | 992.8957         | 1983.8000      | 992.4036         | 15 |
| 14 | 1472.6838 | 736.8456        | 1455.6573      | 728.3323         | 1454.6733      | 727.8403         | W    | 1886.7836 | 943.8955        | 1869.7571      | 935.3822         | 1868.7731      | 934.8902         | 14 |
| 15 | 1559.7159 | 780.3616        | 1542.6893      | 771.8483         | 1541.7053      | 771.3563         | S    | 1700.7043 | 850.8558        | 1683.6778      | 842.3425         | 1682.6938      | 841.8505         | 13 |
| 16 | 1688.7585 | 844.8829        | 1671.7319      | 836.3696         | 1670.7479      | 835.8776         | E    | 1613.6723 | 807.3398        | 1596.6457      | 798.8265         | 1595.6617      | 798.3345         | 12 |
| 17 | 1874.8378 | 937.9225        | 1857.8112      | 929.4093         | 1856.8272      | 928.9172         | W    | 1484.6297 | 742.8185        | 1467.6031      | 734.3052         | 1466.6191      | 733.8132         | 11 |
| 18 | 1975.8855 | 988.4464        | 1958.8589      | 979.9331         | 1957.8749      | 979.4411         | T    | 1298.5504 | 649.7788        | 1281.5238      | 641.2656         | 1280.5398      | 640.7735         | 10 |
| 19 | 2090.9124 | 1045.9598       | 2073.8858      | 1037.4466        | 2072.9018      | 1036.9546        | D    | 1197.5027 | 599.2550        | 1180.4762      | 590.7417         | 1179.4921      | 590.2497         | 9  |
| 20 | 2250.9430 | 1125.9752       | 2233.9165      | 1117.4619        | 2232.9325      | 1116.9699        | C    | 1082.4758 | 541.7415        | 1065.4492      | 533.2282         | 1064.4652      | 532.7362         | 8  |
| 21 | 2398.0115 | 1199.5094       | 2380.9849      | 1190.9961        | 2380.0009      | 1190.5041        | F    | 922.4451  | 461.7262        | 905.4186       | 453.2129         | 904.4345       | 452.7209         | 7  |
| 22 | 2495.0642 | 1248.0358       | 2478.0377      | 1239.5225        | 2477.0537      | 1239.0305        | P    | 775.3767  | 388.1920        | 758.3502       | 379.6787         | 757.3661       | 379.1867         | 6  |
| 23 | 2655.0949 | 1328.0511       | 2638.0683      | 1319.5378        | 2637.0843      | 1319.0458        | C    | 678.3239  | 339.6656        | 661.2974       | 331.1523         | 660.3134       | 330.6603         | 5  |

|    |           |           |           |           |           |           |   |          |          |          |          |          |          |   |
|----|-----------|-----------|-----------|-----------|-----------|-----------|---|----------|----------|----------|----------|----------|----------|---|
| 24 | 2783.1535 | 1392.0804 | 2766.1269 | 1383.5671 | 2765.1429 | 1383.0751 | Q | 518.2933 | 259.6503 | 501.2667 | 251.1370 | 500.2827 | 250.6450 | 4 |
| 25 | 2898.1804 | 1449.5938 | 2881.1538 | 1441.0806 | 2880.1698 | 1440.5886 | D | 390.2347 | 195.6210 | 373.2082 | 187.1077 | 372.2241 | 186.6157 | 3 |
| 26 | 3026.2754 | 1513.6413 | 3009.2488 | 1505.1280 | 3008.2648 | 1504.6360 | K | 275.2078 | 138.1075 | 258.1812 | 129.5942 |          |          | 2 |
| 27 |           |           |           |           |           |           | K | 147.1128 | 74.0600  | 130.0863 | 65.5468  |          |          | 1 |

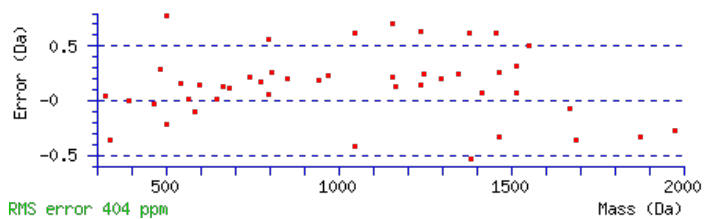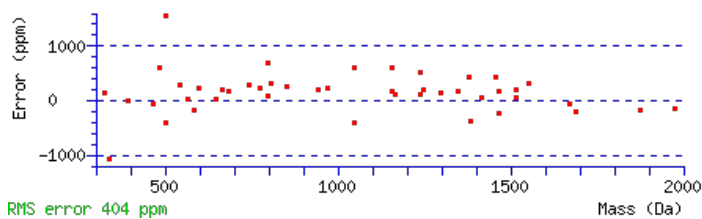

NCBI **BLAST** search of [AATPAAVTCQLSNWSEWTDCEPCQDKK](#)  
 (Parameters: blastp, nr protein database, expect=20000, no filter, PAM30)  
 Other BLAST [web gateways](#)

**All matches to this query**

| Score | Mr(calc)  | Delta  | Sequence                                    | Site Analysis         |
|-------|-----------|--------|---------------------------------------------|-----------------------|
| 80.1  | 3171.3736 | 0.0021 | <a href="#">AATPAAVTCQLSNWSEWTDCEPCQDKK</a> | Deamidated N13 83.36% |
| 70.1  | 3171.3736 | 0.0021 | <a href="#">AATPAAVTCQLSNWSEWTDCEPCQDKK</a> | Deamidated Q10 8.37%  |
| 70.0  | 3171.3736 | 0.0021 | <a href="#">AATPAAVTCQLSNWSEWTDCEPCQDKK</a> | Deamidated Q24 8.26%  |
| 0.1   | 3171.3657 | 0.0100 | <a href="#">MEINNRNMYDVNVTCPCLCVPPSSWK</a>  |                       |
| 0.0   | 3171.3657 | 0.0100 | <a href="#">MEINNRNMYDVNVTCPCLCVPPSSWK</a>  |                       |
| 0.0   | 3171.3657 | 0.0100 | <a href="#">MEINNRNMYDVNVTCPCLCVPPSSWK</a>  |                       |

Mascot: <http://www.matrixscience.com/>

# MATRIX SCIENCE Mascot Search Results

## Peptide View

MS/MS Fragmentation of **VRGGSSGWSGGLAQNR**

Found in **P07357** in **con\_Xuniprot\_HUMAN3**, CO8A\_HUMAN Complement component C8 alpha chain OS=Homo sapiens GN=C8A PE=1 SV=2

Match to Query 7598: 1588.774548 from(795.394550,2+) intensity(19271.7539) rtinseconds(406) scans(858) index(24339)

Title: 111019\_Est\_MI\_YS\_G\_06Spectrum731\_scans\_\_858

Data file C:\mascot\20140703\_Tmgf\_1D\CSV\_UseAnalysis\MasterCSV\All\_Glyco\mgf\ptm\UC18ERLIC\_PTM\_35D.mgf

Click mouse within plot area to zoom in by factor of two about that point

Or, to Da

Label all possible matches Label matches used for scoring

Show Y-axis

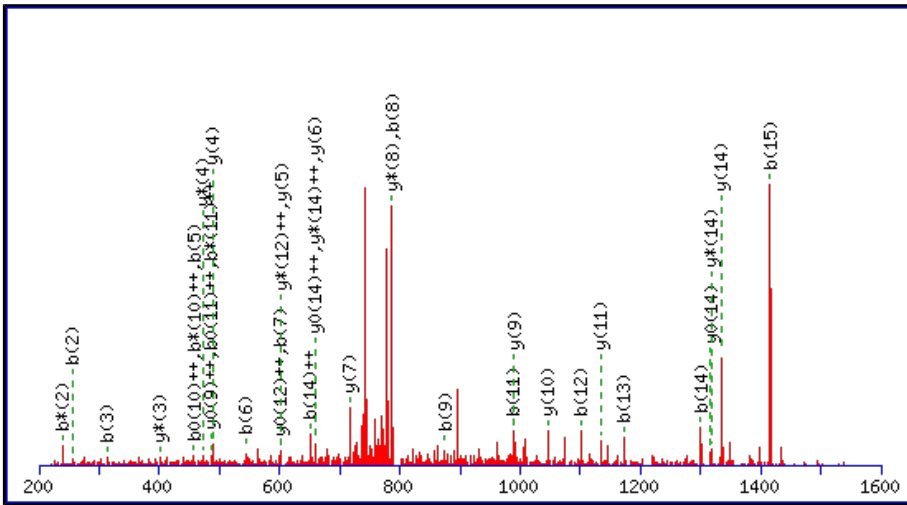

Monoisotopic mass of neutral peptide  $M_r(\text{calc})$ : 1588.7706

Fixed modifications: Carbamidomethyl (C) (apply to specified residues or termini only)

Variable modifications:

N15 : Deamidated (NQ)

Ions Score: 74 Expect: 9.4e-006

Matches : 36/156 fragment ions using 54 most intense peaks ([help](#))

| #  | b                | b <sup>++</sup> | b <sup>*</sup>  | b <sup>*++</sup> | b <sup>0</sup> | b <sup>0++</sup> | Seq. | y                | y <sup>++</sup> | y <sup>*</sup>   | y <sup>*++</sup> | y <sup>0</sup>   | y <sup>0++</sup> | #  |
|----|------------------|-----------------|-----------------|------------------|----------------|------------------|------|------------------|-----------------|------------------|------------------|------------------|------------------|----|
| 1  | 100.0757         | 50.5415         |                 |                  |                |                  | V    |                  |                 |                  |                  |                  |                  | 16 |
| 2  | <b>256.1768</b>  | 128.5920        | <b>239.1503</b> | 120.0788         |                |                  | R    | 1490.7095        | 745.8584        | 1473.6829        | 737.3451         | 1472.6989        | 736.8531         | 15 |
| 3  | <b>313.1983</b>  | 157.1028        | 296.1717        | 148.5895         |                |                  | G    | <b>1334.6084</b> | 667.8078        | <b>1317.5818</b> | <b>659.2945</b>  | <b>1316.5978</b> | <b>658.8025</b>  | 14 |
| 4  | 370.2197         | 185.6135        | 353.1932        | 177.1002         |                |                  | G    | 1277.5869        | 639.2971        | 1260.5604        | 630.7838         | 1259.5763        | 630.2918         | 13 |
| 5  | <b>457.2518</b>  | 229.1295        | 440.2252        | 220.6162         | 439.2412       | 220.1242         | S    | 1220.5654        | 610.7864        | 1203.5389        | <b>602.2731</b>  | 1202.5549        | <b>601.7811</b>  | 12 |
| 6  | <b>544.2838</b>  | 272.6455        | 527.2572        | 264.1323         | 526.2732       | 263.6402         | S    | <b>1133.5334</b> | 567.2703        | 1116.5069        | 558.7571         | 1115.5228        | 558.2651         | 11 |
| 7  | <b>601.3052</b>  | 301.1563        | 584.2787        | 292.6430         | 583.2947       | 292.1510         | G    | <b>1046.5014</b> | 523.7543        | 1029.4748        | 515.2411         | 1028.4908        | 514.7490         | 10 |
| 8  | <b>787.3846</b>  | 394.1959        | 770.3580        | 385.6826         | 769.3740       | 385.1906         | W    | <b>989.4799</b>  | 495.2436        | 972.4534         | 486.7303         | 971.4694         | <b>486.2383</b>  | 9  |
| 9  | <b>874.4166</b>  | 437.7119        | 857.3900        | 429.1987         | 856.4060       | 428.7067         | S    | 803.4006         | 402.2039        | <b>786.3741</b>  | 393.6907         | 785.3900         | 393.1987         | 8  |
| 10 | 931.4381         | 466.2227        | 914.4115        | <b>457.7094</b>  | 913.4275       | <b>457.2174</b>  | G    | <b>716.3686</b>  | 358.6879        | 699.3420         | 350.1747         |                  |                  | 7  |
| 11 | <b>988.4595</b>  | 494.7334        | 971.4330        | <b>486.2201</b>  | 970.4490       | <b>485.7281</b>  | G    | <b>659.3471</b>  | 330.1772        | 642.3206         | 321.6639         |                  |                  | 6  |
| 12 | <b>1101.5436</b> | 551.2754        | 1084.5170       | 542.7622         | 1083.5330      | 542.2701         | L    | <b>602.3257</b>  | 301.6665        | 585.2991         | 293.1532         |                  |                  | 5  |
| 13 | <b>1172.5807</b> | 586.7940        | 1155.5541       | 578.2807         | 1154.5701      | 577.7887         | A    | <b>489.2416</b>  | 245.1244        | <b>472.2150</b>  | 236.6112         |                  |                  | 4  |
| 14 | <b>1300.6393</b> | <b>650.8233</b> | 1283.6127       | 642.3100         | 1282.6287      | 641.8180         | Q    | 418.2045         | 209.6059        | <b>401.1779</b>  | 201.0926         |                  |                  | 3  |
| 15 | <b>1415.6662</b> | 708.3367        | 1398.6397       | 699.8235         | 1397.6557      | 699.3315         | N    | 290.1459         | 145.5766        | 273.1193         | 137.0633         |                  |                  | 2  |
| 16 |                  |                 |                 |                  |                |                  | R    | 175.1190         | 88.0631         | 158.0924         | 79.5498          |                  |                  | 1  |

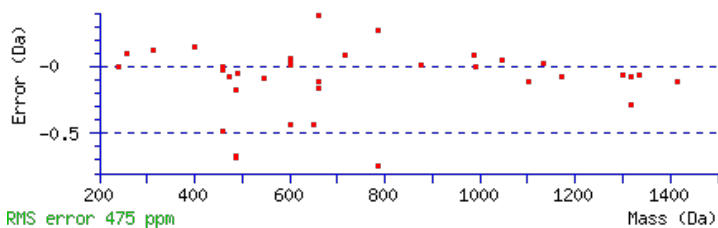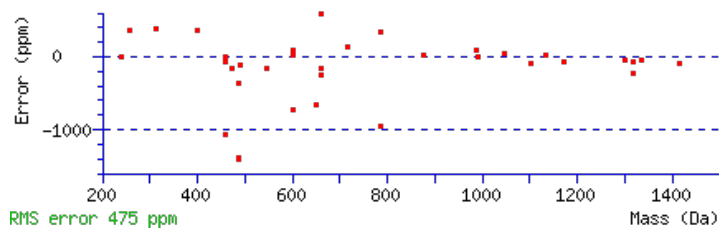

NCBI BLAST search of [VRGGSSGWSGGLAQNR](#)

(Parameters: blastp, nr protein database, expect=20000, no filter, PAM30)

Other BLAST [web gateways](#)

**All matches to this query**

| Score | Mr(calc)  | Delta   | Sequence                         | Site Analysis         |
|-------|-----------|---------|----------------------------------|-----------------------|
| 73.9  | 1588.7706 | 0.0039  | <a href="#">VRGGSSGWSGGLAQNR</a> | Deamidated N15 50.75% |
| 73.8  | 1588.7706 | 0.0039  | <a href="#">VRGGSSGWSGGLAQNR</a> | Deamidated Q14 49.25% |
| 8.3   | 1588.7805 | -0.0059 | <a href="#">DRQKLVSSQEQDR</a>    |                       |
| 6.4   | 1588.7746 | -0.0001 | <a href="#">WRQQWSGPGTTKR</a>    |                       |
| 4.3   | 1588.7780 | -0.0034 | <a href="#">RMLEAPYQNQPSR</a>    |                       |
| 4.1   | 1588.7766 | -0.0021 | <a href="#">IMEDIEENKVNVR</a>    |                       |
| 4.1   | 1588.7766 | -0.0021 | <a href="#">IMEDIEENKVNVR</a>    |                       |
| 3.3   | 1588.7766 | -0.0021 | <a href="#">LEQDLQMQAKVR</a>     |                       |
| 2.5   | 1588.7746 | -0.0001 | <a href="#">ASIDGFDRYFRSR</a>    |                       |
| 1.6   | 1588.7733 | 0.0013  | <a href="#">ELYELPIGQEENR</a>    |                       |

Mascot: <http://www.matrixscience.com/>

# MASCOT SCIENCE Mascot Search Results

## Peptide View

MS/MS Fragmentation of **GGSSGWSGGLAQNR**

Found in **P07357** in **con\_Xuniprot\_HUMAN3**, CO8A\_HUMAN Complement component C8 alpha chain OS=Homo sapiens GN=C8A PE=1 SV=2

Match to Query 2029: 1333.607748 from(667.811150,2+) intensity(14344.3994) rtinseconds(568) scans(1150) index(1871)

Title: 111019\_Est\_ISCardio\_NMI\_YP\_G\_4Spectrum945\_scans\_\_1150

Data file C:\mascot\20140703\_Tmgf\_1D\CSV\_UseAnalysis\MasterCSV\All\_Glyco\mgf\ptm\UC18ERLIC\_PTM\_35D.mgf

Click mouse within plot area to zoom in by factor of two about that point

Or, to Da

Label all possible matches Label matches used for scoring

Show Y-axis

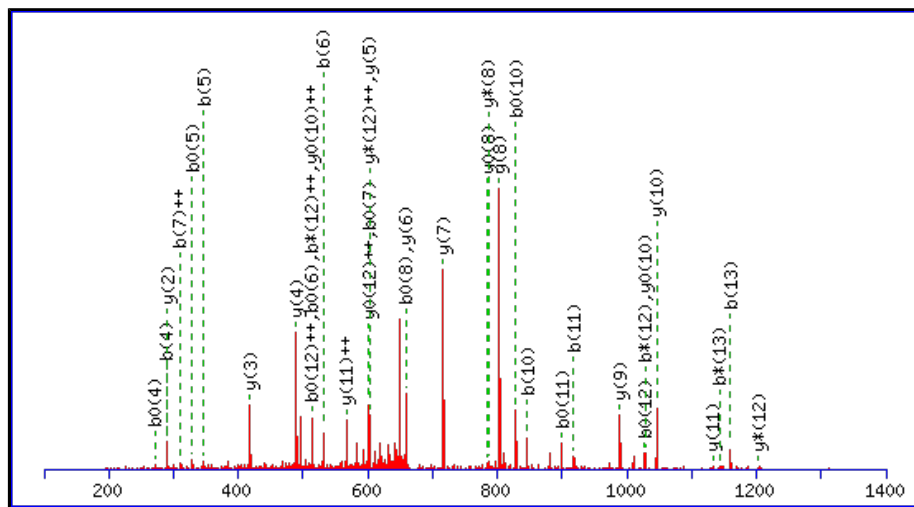

Monoisotopic mass of neutral peptide Mr(calc): 1333.6011

Fixed modifications: Carbamidomethyl (C) (apply to specified residues or termini only)

Variable modifications:

N13 : Deamidated (NQ)

Ions Score: 65 Expect: 4.4e-005

Matches : 37/116 fragment ions using 54 most intense peaks ([help](#))

| #  | b                | b <sup>++</sup> | b <sup>*</sup> | b <sup>***</sup> | b <sup>0</sup> | b <sup>0++</sup> | Seq.     | y                | y <sup>++</sup> | y <sup>*</sup> | y <sup>***</sup> | y <sup>0</sup> | y <sup>0++</sup> | #  |
|----|------------------|-----------------|----------------|------------------|----------------|------------------|----------|------------------|-----------------|----------------|------------------|----------------|------------------|----|
| 1  | 58.0287          | 29.5180         |                |                  |                |                  | <b>G</b> |                  |                 |                |                  |                |                  | 14 |
| 2  | 115.0502         | 58.0287         |                |                  |                |                  | <b>G</b> | 1277.5869        | 639.2971        | 1260.5604      | 630.7838         | 1259.5763      | 630.2918         | 13 |
| 3  | 202.0822         | 101.5448        |                |                  | 184.0717       | 92.5395          | <b>S</b> | 1220.5654        | 610.7864        | 1203.5389      | 602.2731         | 1202.5549      | 601.7811         | 12 |
| 4  | <b>289.1143</b>  | 145.0608        |                |                  | 271.1037       | 136.0555         | <b>S</b> | <b>1133.5334</b> | <b>567.2703</b> | 1116.5069      | 558.7571         | 1115.5228      | 558.2651         | 11 |
| 5  | <b>346.1357</b>  | 173.5715        |                |                  | 328.1252       | 164.5662         | <b>G</b> | <b>1046.5014</b> | 523.7543        | 1029.4748      | 515.2411         | 1028.4908      | 514.7490         | 10 |
| 6  | <b>532.2150</b>  | 266.6112        |                |                  | 514.2045       | 257.6059         | <b>W</b> | <b>989.4799</b>  | 495.2436        | 972.4534       | 486.7303         | 971.4694       | 486.2383         | 9  |
| 7  | 619.2471         | 310.1272        |                |                  | 601.2365       | 301.1219         | <b>S</b> | <b>803.4006</b>  | 402.2039        | 786.3741       | 393.6907         | 785.3900       | 393.1987         | 8  |
| 8  | 676.2685         | 338.6379        |                |                  | 658.2580       | 329.6326         | <b>G</b> | <b>716.3686</b>  | 358.6879        | 699.3420       | 350.1747         |                |                  | 7  |
| 9  | 733.2900         | 367.1486        |                |                  | 715.2794       | 358.1434         | <b>G</b> | <b>659.3471</b>  | 330.1772        | 642.3206       | 321.6639         |                |                  | 6  |
| 10 | <b>846.3741</b>  | 423.6907        |                |                  | 828.3635       | 414.6854         | <b>L</b> | <b>602.3257</b>  | 301.6665        | 585.2991       | 293.1532         |                |                  | 5  |
| 11 | <b>917.4112</b>  | 459.2092        |                |                  | 899.4006       | 450.2039         | <b>A</b> | <b>489.2416</b>  | 245.1244        | 472.2150       | 236.6112         |                |                  | 4  |
| 12 | 1045.4697        | 523.2385        | 1028.4432      | 514.7252         | 1027.4592      | 514.2332         | <b>Q</b> | <b>418.2045</b>  | 209.6059        | 401.1779       | 201.0926         |                |                  | 3  |
| 13 | <b>1160.4967</b> | 580.7520        | 1143.4701      | 572.2387         | 1142.4861      | 571.7467         | <b>N</b> | <b>290.1459</b>  | 145.5766        | 273.1193       | 137.0633         |                |                  | 2  |
| 14 |                  |                 |                |                  |                |                  | <b>R</b> | 175.1190         | 88.0631         | 158.0924       | 79.5498          |                |                  | 1  |

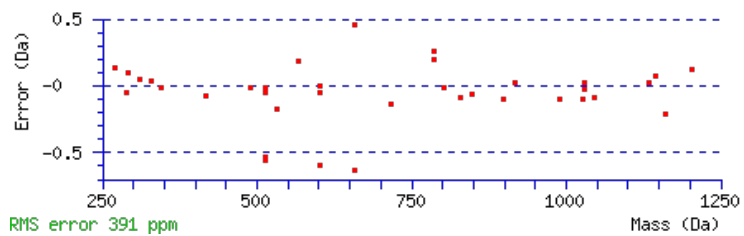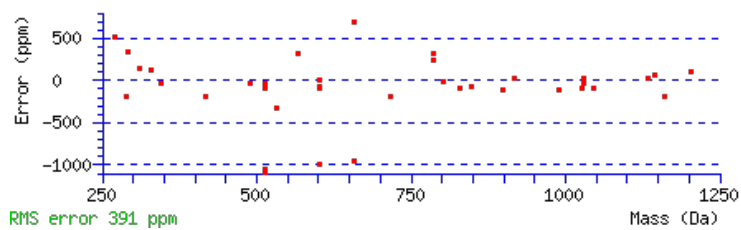

NCBI BLAST search of [GGSSGWSGGLAQNR](#)

(Parameters: blastp, nr protein database, expect=20000, no filter, PAM30)

Other BLAST [web gateways](#)

**All matches to this query**

| Score | Mr(calc)  | Delta   | Sequence                       | Site Analysis         |
|-------|-----------|---------|--------------------------------|-----------------------|
| 64.6  | 1333.6011 | 0.0067  | <a href="#">GGSSGWSGGLAQNR</a> | Deamidated N13 65.43% |
| 61.8  | 1333.6011 | 0.0067  | <a href="#">GGSSGWSGGLAQNR</a> | Deamidated Q12 34.57% |
| 10.1  | 1333.6109 | -0.0032 | <a href="#">QAQPSSKTASGNR</a>  |                       |
| 9.1   | 1332.6058 | 1.0019  | <a href="#">NNLYPNSSPGNR</a>   |                       |
| 9.1   | 1332.6058 | 1.0019  | <a href="#">NNLYPNSSPGNR</a>   |                       |
| 8.9   | 1333.6085 | -0.0007 | <a href="#">LCELSAQGWNR</a>    |                       |
| 8.9   | 1332.6092 | 0.9986  | <a href="#">AEQMASVQNAQR</a>   |                       |
| 8.7   | 1332.6058 | 1.0019  | <a href="#">NNLYPNSSPGNR</a>   |                       |
| 8.5   | 1332.6092 | 0.9986  | <a href="#">AEQMASVQNAQR</a>   |                       |
| 8.5   | 1332.6092 | 0.9986  | <a href="#">AEQMASVQNAQR</a>   |                       |

Mascot: <http://www.matrixscience.com/>



# MASCOT SCIENCE Mascot Search Results

## Peptide View

MS/MS Fragmentation of **VRGGSSGWSGGLAQRSTITYR**

Found in **P07357** in **con\_Xuniprot\_HUMAN3**, CO8A\_HUMAN Complement component C8 alpha chain OS=Homo sapiens GN=C8A PE=1 SV=2

Match to Query 15146: 2310.154456 from(578.545890,4+) intensity(7498.9004) rtinseconds(818) scans(1887) index(22498)

Title: 111019\_Est\_ML\_YS\_G\_03Spectrum1615\_scans\_\_1887

Data file C:\mascot\20140703\_Tmgf\_1D\CSV\_UseAnalysis\MasterCSV\All\_Glyco\mgf\ptm\UC18ERLIC\_PTM\_35D.mgf

Click mouse within plot area to zoom in by factor of two about that point

Or, to Da

Label all possible matches Label matches used for scoring

Show Y-axis

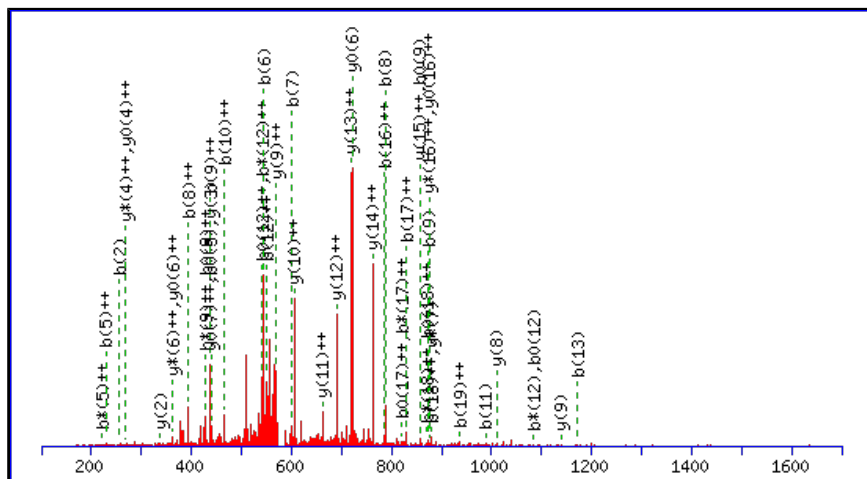

Monoisotopic mass of neutral peptide Mr(calc): 2310.1465

Fixed modifications: Carbamidomethyl (C) (apply to specified residues or termini only)

Variable modifications:

N15 : Deamidated (NQ)

Ions Score: 38 Expect: 0.041

Matches : 49/238 fragment ions using 93 most intense peaks ([help](#))

| #  | b                | b <sup>++</sup> | b <sup>*</sup>   | b <sup>*++</sup> | b <sup>0</sup>   | b <sup>0++</sup> | Seq. | y                | y <sup>++</sup> | y <sup>*</sup>  | y <sup>*++</sup> | y <sup>0</sup>  | y <sup>0++</sup> | #  |
|----|------------------|-----------------|------------------|------------------|------------------|------------------|------|------------------|-----------------|-----------------|------------------|-----------------|------------------|----|
| 1  | 100.0757         | 50.5415         |                  |                  |                  |                  | V    |                  |                 |                 |                  |                 |                  | 22 |
| 2  | <b>256.1768</b>  | 128.5920        | 239.1503         | 120.0788         |                  |                  | R    | 2212.0854        | 1106.5463       | 2195.0588       | 1098.0330        | 2194.0748       | 1097.5410        | 21 |
| 3  | 313.1983         | 157.1028        | 296.1717         | 148.5895         |                  |                  | G    | 2055.9843        | 1028.4958       | 2038.9577       | 1019.9825        | 2037.9737       | 1019.4905        | 20 |
| 4  | 370.2197         | 185.6135        | 353.1932         | 177.1002         |                  |                  | G    | 1998.9628        | 999.9850        | 1981.9362       | 991.4718         | 1980.9522       | 990.9798         | 19 |
| 5  | 457.2518         | <b>229.1295</b> | 440.2252         | <b>220.6162</b>  | <b>439.2412</b>  | 220.1242         | S    | 1941.9413        | 971.4743        | 1924.9148       | 962.9610         | 1923.9308       | 962.4690         | 18 |
| 6  | <b>544.2838</b>  | 272.6455        | 527.2572         | 264.1323         | 526.2732         | 263.6402         | S    | 1854.9093        | 927.9583        | 1837.8828       | 919.4450         | 1836.8987       | 918.9530         | 17 |
| 7  | <b>601.3052</b>  | 301.1563        | 584.2787         | 292.6430         | 583.2947         | 292.1510         | G    | 1767.8773        | 884.4423        | 1750.8507       | <b>875.9290</b>  | 1749.8667       | <b>875.4370</b>  | 16 |
| 8  | <b>787.3846</b>  | <b>394.1959</b> | 770.3580         | 385.6826         | 769.3740         | 385.1906         | W    | 1710.8558        | <b>855.9315</b> | 1693.8293       | 847.4183         | 1692.8452       | 846.9263         | 15 |
| 9  | <b>874.4166</b>  | <b>437.7119</b> | 857.3900         | <b>429.1987</b>  | <b>856.4060</b>  | <b>428.7067</b>  | S    | 1524.7765        | <b>762.8919</b> | 1507.7499       | 754.3786         | 1506.7659       | 753.8866         | 14 |
| 10 | 931.4381         | <b>466.2227</b> | 914.4115         | 457.7094         | 913.4275         | 457.2174         | G    | 1437.7445        | <b>719.3759</b> | 1420.7179       | 710.8626         | 1419.7339       | 710.3706         | 13 |
| 11 | <b>988.4595</b>  | 494.7334        | 971.4330         | 486.2201         | 970.4490         | 485.7281         | G    | 1380.7230        | <b>690.8651</b> | 1363.6965       | 682.3519         | 1362.7124       | 681.8599         | 12 |
| 12 | 1101.5436        | <b>551.2754</b> | <b>1084.5170</b> | <b>542.7622</b>  | <b>1083.5330</b> | <b>542.2701</b>  | L    | 1323.7015        | <b>662.3544</b> | 1306.6750       | 653.8411         | 1305.6910       | 653.3491         | 11 |
| 13 | <b>1172.5807</b> | 586.7940        | 1155.5541        | 578.2807         | 1154.5701        | 577.7887         | A    | 1210.6175        | <b>605.8124</b> | 1193.5909       | 597.2991         | 1192.6069       | 596.8071         | 10 |
| 14 | 1300.6393        | 650.8233        | 1283.6127        | 642.3100         | 1282.6287        | 641.8180         | Q    | <b>1139.5804</b> | <b>570.2938</b> | 1122.5538       | 561.7805         | 1121.5698       | 561.2885         | 9  |
| 15 | 1415.6662        | 708.3367        | 1398.6397        | 699.8235         | 1397.6557        | 699.3315         | N    | <b>1011.5218</b> | 506.2645        | 994.4952        | 497.7513         | 993.5112        | 497.2592         | 8  |
| 16 | 1571.7673        | <b>786.3873</b> | 1554.7408        | 777.8740         | 1553.7568        | 777.3820         | R    | 896.4948         | 448.7511        | <b>879.4683</b> | 440.2378         | 878.4843        | <b>439.7458</b>  | 7  |
| 17 | 1658.7994        | <b>829.9033</b> | 1641.7728        | <b>821.3900</b>  | 1640.7888        | <b>820.8980</b>  | S    | 740.3937         | 370.7005        | 723.3672        | <b>362.1872</b>  | <b>722.3832</b> | <b>361.6952</b>  | 6  |
| 18 | 1759.8470        | <b>880.4272</b> | 1742.8205        | <b>871.9139</b>  | 1741.8365        | <b>871.4219</b>  | T    | 653.3617         | 327.1845        | 636.3352        | 318.6712         | 635.3511        | 318.1792         | 5  |
| 19 | 1872.9311        | <b>936.9692</b> | 1855.9046        | 928.4559         | 1854.9205        | 927.9639         | I    | 552.3140         | 276.6607        | 535.2875        | <b>268.1474</b>  | 534.3035        | <b>267.6554</b>  | 4  |
| 20 | 1973.9788        | 987.4930        | 1956.9522        | 978.9798         | 1955.9682        | 978.4877         | T    | <b>439.2300</b>  | 220.1186        | 422.2034        | 211.6053         | 421.2194        | 211.1133         | 3  |
| 21 | 2137.0421        | 1069.0247       | 2120.0156        | 1060.5114        | 2119.0315        | 1060.0194        | Y    | <b>338.1823</b>  | 169.5948        | 321.1557        | 161.0815         |                 |                  | 2  |
| 22 |                  |                 |                  |                  |                  |                  | R    | 175.1190         | 88.0631         | 158.0924        | 79.5498          |                 |                  | 1  |

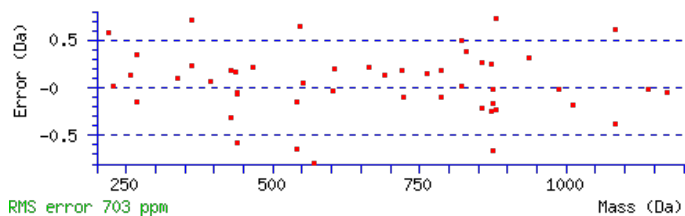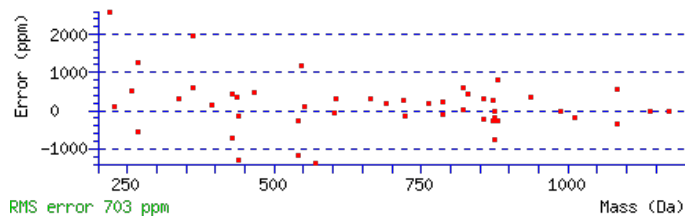

NCBI BLAST search of [VRGGSSGWSGGLAQNRSITYR](#)

(Parameters: blastp, nr protein database, expect=20000, no filter, PAM30)

Other BLAST [web gateways](#)

**All matches to this query**

| Score | Mr(calc)  | Delta   | Sequence                              | Site Analysis         |
|-------|-----------|---------|---------------------------------------|-----------------------|
| 38.0  | 2310.1465 | 0.0080  | <a href="#">VRGGSSGWSGGLAQNRSITYR</a> | Deamidated N15 63.42% |
| 35.7  | 2310.1465 | 0.0080  | <a href="#">VRGGSSGWSGGLAQNRSITYR</a> | Deamidated Q14 36.58% |
| 24.9  | 2309.1625 | 0.9920  | <a href="#">VRGGSSGWSGGLAQNRSITYR</a> |                       |
| 10.1  | 2309.1427 | 1.0118  | <a href="#">VFQWTASTATITKEKQDQPK</a>  |                       |
| 8.5   | 2308.1587 | 1.9958  | <a href="#">VFQWTASTATITKEKQDQPK</a>  |                       |
| 7.7   | 2308.1528 | 2.0016  | <a href="#">LMTRHMAQPSEIRIQTSHR</a>   |                       |
| 7.3   | 2308.1587 | 1.9958  | <a href="#">VFQWTASTATITKEKQDQPK</a>  |                       |
| 6.2   | 2310.1644 | -0.0100 | <a href="#">QDIYRKAISPOQFDPESELR</a>  |                       |
| 5.1   | 2308.1434 | 2.0110  | <a href="#">FLKNEDQVDQLLQTKSSLDS</a>  |                       |
| 5.1   | 2308.1434 | 2.0110  | <a href="#">FLKNEDQVDQLLQTKSSLDS</a>  |                       |

Mascot: <http://www.matrixscience.com/>

# MATRIX SCIENCE Mascot Search Results

## Peptide View

MS/MS Fragmentation of **VVNSTTGPEHLR**

Found in **P07996** in **con\_Xuniprot\_HUMAN3**, TSP1\_HUMAN Thrombospondin-1 OS=Homo sapiens GN=THBS1 PE=1 SV=2

Match to Query 2378: 1366.686608 from(684.350580,2+) intensity(7093.3613) rtinseconds(285) scans(434) index(15566)

Title: 111019\_Est\_MI\_YP\_G\_05Spectrum340\_scans\_434

Data file C:\\mascot\\20140703\_Tmgf\_1D\\CSV\_UseAnalysis\\MasterCSV\\All\_Glyco\\mgf\\ptm\\UC18ERLIC\_PTM\_35D.mgf

Click mouse within plot area to zoom in by factor of two about that point

Or, to Da

Label all possible matches Label matches used for scoring

Show Y-axis

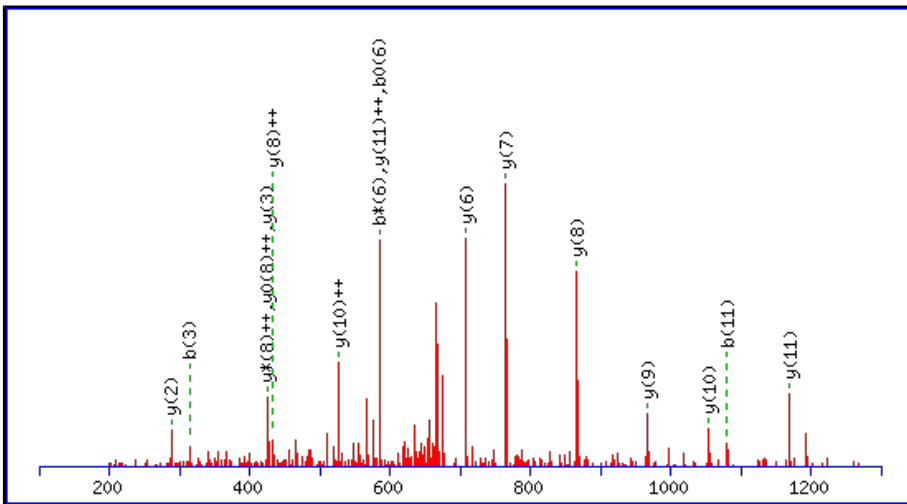

Monoisotopic mass of neutral peptide Mr(calc): 1366.6841

Fixed modifications: Carbamidomethyl (C) (apply to specified residues or termini only)

Variable modifications:

N3 : Deamidated (NQ)

Ions Score: 60 Expect: 0.00019

Matches : 17/128 fragment ions using 22 most intense peaks ([help](#))

| #  | b                | b <sup>++</sup> | b <sup>*</sup>  | b <sup>*++</sup> | b <sup>0</sup>  | b <sup>0++</sup> | Seq. | y                | y <sup>++</sup> | y <sup>*</sup> | y <sup>*++</sup> | y <sup>0</sup> | y <sup>0++</sup> | #  |
|----|------------------|-----------------|-----------------|------------------|-----------------|------------------|------|------------------|-----------------|----------------|------------------|----------------|------------------|----|
| 1  | 100.0757         | 50.5415         |                 |                  |                 |                  | V    |                  |                 |                |                  |                |                  | 13 |
| 2  | 199.1441         | 100.0757        |                 |                  |                 |                  | V    | 1268.6230        | 634.8151        | 1251.5964      | 626.3018         | 1250.6124      | 625.8098         | 12 |
| 3  | <b>314.1710</b>  | 157.5892        | 297.1445        | 149.0759         |                 |                  | N    | <b>1169.5545</b> | <b>585.2809</b> | 1152.5280      | 576.7676         | 1151.5440      | 576.2756         | 11 |
| 4  | 401.2031         | 201.1052        | 384.1765        | 192.5919         | 383.1925        | 192.0999         | S    | <b>1054.5276</b> | <b>527.7674</b> | 1037.5011      | 519.2542         | 1036.5170      | 518.7622         | 10 |
| 5  | 502.2508         | 251.6290        | 485.2242        | 243.1157         | 484.2402        | 242.6237         | T    | <b>967.4956</b>  | 484.2514        | 950.4690       | 475.7381         | 949.4850       | 475.2461         | 9  |
| 6  | 603.2984         | 302.1529        | <b>586.2719</b> | 293.6396         | <b>585.2879</b> | 293.1476         | T    | <b>866.4479</b>  | <b>433.7276</b> | 849.4213       | <b>425.2143</b>  | 848.4373       | <b>424.7223</b>  | 8  |
| 7  | 660.3199         | 330.6636        | 643.2933        | 322.1503         | 642.3093        | 321.6583         | G    | <b>765.4002</b>  | 383.2037        | 748.3737       | 374.6905         | 747.3896       | 374.1985         | 7  |
| 8  | 757.3727         | 379.1900        | 740.3461        | 370.6767         | 739.3621        | 370.1847         | P    | <b>708.3787</b>  | 354.6930        | 691.3522       | 346.1797         | 690.3682       | 345.6877         | 6  |
| 9  | 814.3941         | 407.7007        | 797.3676        | 399.1874         | 796.3836        | 398.6954         | G    | 611.3260         | 306.1666        | 594.2994       | 297.6534         | 593.3154       | 297.1613         | 5  |
| 10 | 943.4367         | 472.2220        | 926.4102        | 463.7087         | 925.4262        | 463.2167         | E    | 554.3045         | 277.6559        | 537.2780       | 269.1426         | 536.2940       | 268.6506         | 4  |
| 11 | <b>1080.4956</b> | 540.7515        | 1063.4691       | 532.2382         | 1062.4851       | 531.7462         | H    | <b>425.2619</b>  | 213.1346        | 408.2354       | 204.6213         |                |                  | 3  |
| 12 | 1193.5797        | 597.2935        | 1176.5531       | 588.7802         | 1175.5691       | 588.2882         | L    | <b>288.2030</b>  | 144.6051        | 271.1765       | 136.0919         |                |                  | 2  |
| 13 |                  |                 |                 |                  |                 |                  | R    | 175.1190         | 88.0631         | 158.0924       | 79.5498          |                |                  | 1  |

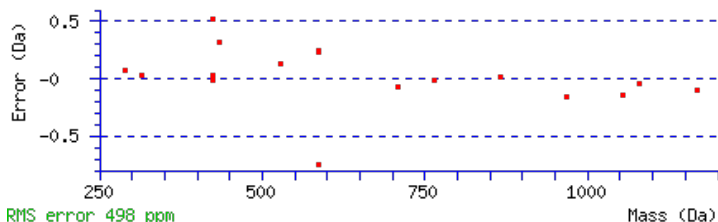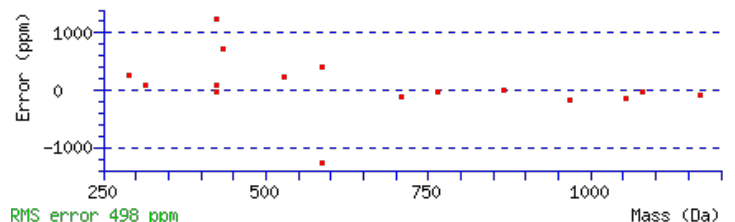

NCBI **BLAST** search of [VVNSTTGPGEHLR](#)

(Parameters: blastp, nr protein database, expect=20000, no filter, PAM30)

Other BLAST [web gateways](#)

**All matches to this query**

| Score | Mr(calc)  | Delta   | Sequence                      |
|-------|-----------|---------|-------------------------------|
| 60.2  | 1366.6841 | 0.0025  | <a href="#">VVNSTTGPGEHLR</a> |
| 11.1  | 1366.6841 | 0.0026  | <a href="#">TPNNRPDAPKEK</a>  |
| 7.9   | 1366.6915 | -0.0049 | <a href="#">TPGVYCSTLLRT</a>  |
| 4.8   | 1364.6765 | 2.0101  | <a href="#">GDIIEGFFWPGK</a>  |
| 4.0   | 1366.6841 | 0.0026  | <a href="#">TPNNRPDAPKEK</a>  |
| 2.0   | 1365.6888 | 0.9978  | <a href="#">VVSQSTDPSKYR</a>  |
| 0.8   | 1364.6837 | 2.0029  | <a href="#">RWEEVQSYIR</a>    |
| 0.8   | 1365.6888 | 0.9978  | <a href="#">TGEQYSVLGKER</a>  |
| 0.4   | 1366.6841 | 0.0025  | <a href="#">VDVGRYTDVSTR</a>  |
| 0.3   | 1364.6792 | 2.0074  | <a href="#">MIDLLQSLCTR</a>   |

**Mascot:** <http://www.matrixscience.com/>

# MASCOT SCIENCE Mascot Search Results

## Peptide View

MS/MS Fragmentation of **KVSCPIMPCSNATVPDGECCPR**

Found in **P07996** in **con\_Xuniprot\_HUMAN3**, TSP1\_HUMAN Thrombospondin-1 OS=Homo sapiens GN=THBS1 PE=1 SV=2

Match to Query 21931: 2551.074642 from(851.365490,3+) intensity(4140.8208) rtinseconds(650) scans(1420) index(3661)

Title: 111019\_Est\_ISCardio\_NMI\_YP\_G\_6Spectrum1185\_scans\_\_1420

Data file C:\mascot\20140703\_Tmgf\_1D\CSV\_UseAnalysis\MasterCSV\All\_Glyco\mgf\ptm\UC18ERLIC\_PTM\_35D.mgf

Click mouse within plot area to zoom in by factor of two about that point

Or, to Da

Label all possible matches Label matches used for scoring

Show Y-axis

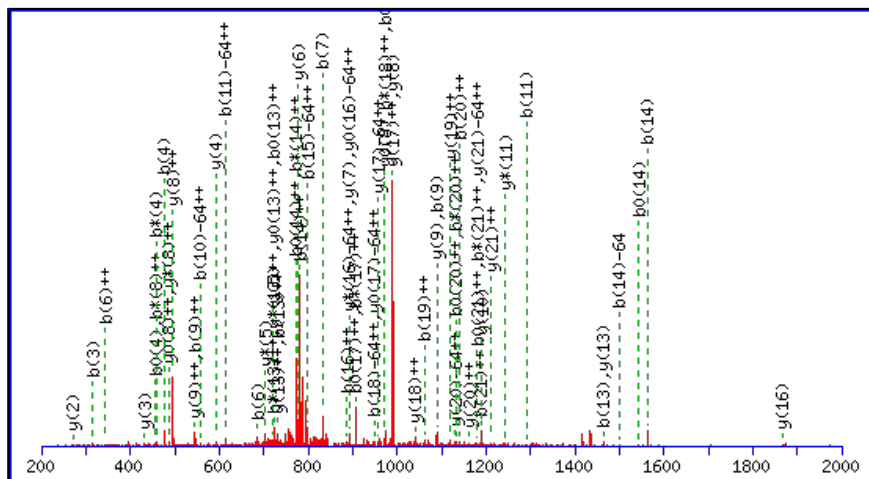

Monoisotopic mass of neutral peptide Mr(calc): 2551.0634

Fixed modifications: Carbamidomethyl (C) (apply to specified residues or termini only)

Variable modifications:

M7 : Oxidation (M), with neutral losses 0.0000 (shown in table), 63.9983

N11 : Deamidated (NQ)

Ions Score: 38 Expect: 0.0069

Matches : 69/366 fragment ions using 144 most intense peaks ([help](#))

| #  | b                | b <sup>++</sup>  | b <sup>*</sup>  | b <sup>*++</sup> | b <sup>0</sup>   | b <sup>0++</sup> | Seq.     | y                | y <sup>++</sup>  | y <sup>*</sup>   | y <sup>*++</sup> | y <sup>0</sup>  | y <sup>0++</sup> | #         |
|----|------------------|------------------|-----------------|------------------|------------------|------------------|----------|------------------|------------------|------------------|------------------|-----------------|------------------|-----------|
| 1  | 129.1022         | 65.0548          | 112.0757        | 56.5415          |                  |                  | <b>K</b> |                  |                  |                  |                  |                 |                  | <b>22</b> |
| 2  | 228.1707         | 114.5890         | 211.1441        | 106.0757         |                  |                  | <b>V</b> | 2423.9757        | <b>1212.4915</b> | 2406.9491        | 1203.9782        | 2405.9651       | 1203.4862        | <b>21</b> |
| 3  | <b>315.2027</b>  | 158.1050         | 298.1761        | 149.5917         | 297.1921         | 149.0997         | <b>S</b> | 2324.9073        | <b>1162.9573</b> | 2307.8807        | 1154.4440        | 2306.8967       | 1153.9520        | <b>20</b> |
| 4  | <b>475.2333</b>  | 238.1203         | <b>458.2068</b> | 229.6070         | <b>457.2228</b>  | 229.1150         | <b>C</b> | 2237.8752        | <b>1119.4413</b> | 2220.8487        | 1110.9280        | 2219.8647       | 1110.4360        | <b>19</b> |
| 5  | 572.2861         | 286.6467         | 555.2595        | 278.1334         | 554.2755         | 277.6414         | <b>P</b> | 2077.8446        | <b>1039.4259</b> | 2060.8180        | 1030.9127        | 2059.8340       | 1030.4207        | <b>18</b> |
| 6  | <b>685.3702</b>  | <b>343.1887</b>  | 668.3436        | 334.6754         | 667.3596         | 334.1834         | <b>I</b> | 1980.7918        | <b>990.8996</b>  | 1963.7653        | 982.3863         | 1962.7813       | 981.8943         | <b>17</b> |
| 7  | <b>832.4056</b>  | 416.7064         | 815.3790        | 408.1931         | 814.3950         | 407.7011         | <b>M</b> | <b>1867.7078</b> | 934.3575         | 1850.6812        | 925.8442         | 1849.6972       | 925.3522         | <b>16</b> |
| 8  | 929.4583         | 465.2328         | 912.4318        | <b>456.7195</b>  | 911.4478         | 456.2275         | <b>P</b> | 1720.6724        | 860.8398         | 1703.6458        | 852.3265         | 1702.6618       | 851.8345         | <b>15</b> |
| 9  | <b>1089.4890</b> | <b>545.2481</b>  | 1072.4624       | 536.7348         | 1071.4784        | 536.2428         | <b>C</b> | 1623.6196        | 812.3134         | 1606.5931        | 803.8002         | 1605.6090       | 803.3082         | <b>14</b> |
| 10 | 1176.5210        | 588.7641         | 1159.4945       | 580.2509         | 1158.5104        | 579.7589         | <b>S</b> | <b>1463.5890</b> | <b>732.2981</b>  | 1446.5624        | <b>723.7848</b>  | 1445.5784       | <b>723.2928</b>  | <b>13</b> |
| 11 | <b>1291.5479</b> | 646.2776         | 1274.5214       | 637.7643         | 1273.5374        | 637.2723         | <b>N</b> | 1376.5569        | 688.7821         | 1359.5304        | 680.2688         | 1358.5464       | 679.7768         | <b>12</b> |
| 12 | 1362.5851        | 681.7962         | 1345.5585       | 673.2829         | 1344.5745        | 672.7909         | <b>A</b> | 1261.5300        | 631.2686         | <b>1244.5034</b> | 622.7554         | 1243.5194       | 622.2633         | <b>11</b> |
| 13 | <b>1463.6327</b> | <b>732.3200</b>  | 1446.6062       | <b>723.8067</b>  | 1445.6222        | <b>723.3147</b>  | <b>T</b> | <b>1190.4929</b> | 595.7501         | 1173.4663        | 587.2368         | 1172.4823       | 586.7448         | <b>10</b> |
| 14 | <b>1562.7011</b> | <b>781.8542</b>  | 1545.6746       | <b>773.3409</b>  | <b>1544.6906</b> | <b>772.8489</b>  | <b>V</b> | <b>1089.4452</b> | <b>545.2262</b>  | 1072.4186        | 536.7130         | 1071.4346       | 536.2210         | <b>9</b>  |
| 15 | 1659.7539        | 830.3806         | 1642.7274       | 821.8673         | 1641.7433        | 821.3753         | <b>P</b> | <b>990.3768</b>  | <b>495.6920</b>  | 973.3502         | <b>487.1788</b>  | <b>972.3662</b> | <b>486.6867</b>  | <b>8</b>  |
| 16 | 1774.7809        | <b>887.8941</b>  | 1757.7543       | 879.3808         | 1756.7703        | 878.8888         | <b>D</b> | <b>893.3240</b>  | 447.1656         | 876.2975         | 438.6524         | 875.3134        | 438.1604         | <b>7</b>  |
| 17 | 1831.8023        | 916.4048         | 1814.7758       | <b>907.8915</b>  | 1813.7918        | <b>907.3995</b>  | <b>G</b> | <b>778.2971</b>  | 389.6522         | 761.2705         | 381.1389         | 760.2865        | 380.6469         | <b>6</b>  |
| 18 | 1960.8449        | 980.9261         | 1943.8184       | <b>972.4128</b>  | 1942.8343        | <b>971.9208</b>  | <b>E</b> | <b>721.2756</b>  | 361.1414         | <b>704.2491</b>  | 352.6282         | 703.2650        | 352.1362         | <b>5</b>  |
| 19 | 2120.8756        | <b>1060.9414</b> | 2103.8490       | 1052.4281        | 2102.8650        | 1051.9361        | <b>C</b> | <b>592.2330</b>  | 296.6201         | 575.2065         | 288.1069         |                 |                  | <b>4</b>  |
| 20 | 2280.9062        | <b>1140.9567</b> | 2263.8797       | <b>1132.4435</b> | 2262.8956        | <b>1131.9515</b> | <b>C</b> | <b>432.2024</b>  | 216.6048         | 415.1758         | 208.0915         |                 |                  | <b>3</b>  |
| 21 | 2377.9590        | <b>1189.4831</b> | 2360.9324       | <b>1180.9699</b> | 2359.9484        | <b>1180.4778</b> | <b>P</b> | <b>272.1717</b>  | 136.5895         | 255.1452         | 128.0762         |                 |                  | <b>2</b>  |
| 22 |                  |                  |                 |                  |                  |                  | <b>R</b> | 175.1190         | 88.0631          | 158.0924         | 79.5498          |                 |                  | <b>1</b>  |

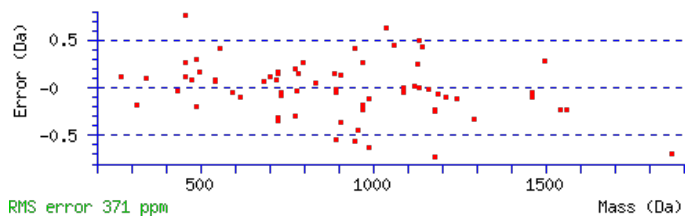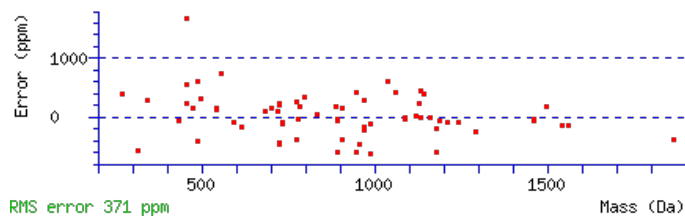

NCBI **BLAST** search of [KVSCPIMPCSNATVPDGECCPR](#)  
 (Parameters: blastp, nr protein database, expect=20000, no filter, PAM30)  
 Other BLAST [web gateways](#)

**All matches to this query**

| Score | Mr(calc)  | Delta   | Sequence                                   |
|-------|-----------|---------|--------------------------------------------|
| 38.2  | 2551.0634 | 0.0113  | <a href="#">KVSCPIMPCSNATVPDGECCPR</a>     |
| 28.4  | 2550.0794 | 0.9953  | <a href="#">KVSCPIMPCSNATVPDGECCPR</a>     |
| 2.8   | 2551.0782 | -0.0036 | <a href="#">WAGDQSHQPSLCAGPTARSNESHG</a>   |
| 2.7   | 2549.0648 | 2.0099  | <a href="#">KENYTATLEDFMTSNMEMFAK</a>      |
| 1.9   | 2551.0690 | 0.0056  | <a href="#">GCEETVEGELDDDIDKPDVMNR</a>     |
| 1.7   | 2551.0793 | -0.0047 | <a href="#">ASSNP NATSSSSQDPESLQDRGEGK</a> |
| 1.7   | 2551.0793 | -0.0047 | <a href="#">ASSNP NATSSSSQDPESLQDRGEGK</a> |
| 1.7   | 2551.0793 | -0.0047 | <a href="#">ASSNP NATSSSSQDPESLQDRGEGK</a> |
| 1.7   | 2551.0793 | -0.0047 | <a href="#">ASSNP NATSSSSQDPESLQDRGEGK</a> |
| 0.1   | 2551.0730 | 0.0016  | <a href="#">SLFQEQEEPEPGMEEAGEMEOK</a>     |

Mascot: <http://www.matrixscience.com/>

# MATRIX SCIENCE Mascot Search Results

## Peptide View

MS/MS Fragmentation of **MDGASNVTCSNR**

Found in **P08603** in **con\_Xuniprot\_HUMAN3**, CFAH\_HUMAN Complement factor H OS=Homo sapiens GN=CFH PE=1 SV=4

Match to Query 4075: 1440.597408 from(721.305980,2+) intensity(964745.7500) rtinseconds(320) scans(678) index(19284)

Title: 111019\_Est\_MI\_YP\_G\_09Spectrum586\_scans\_\_678

Data file C:\\mascot\\20140703\_Tmgf\_1D\\CSV\_UseAnalysis\\MasterCSV\\All\_Glyco\\mgf\\ptm\\UC18ERLIC\_PTM\_35D.mgf

Click mouse within plot area to zoom in by factor of two about that point

Or, to Da

Label all possible matches Label matches used for scoring

Show Y-axis

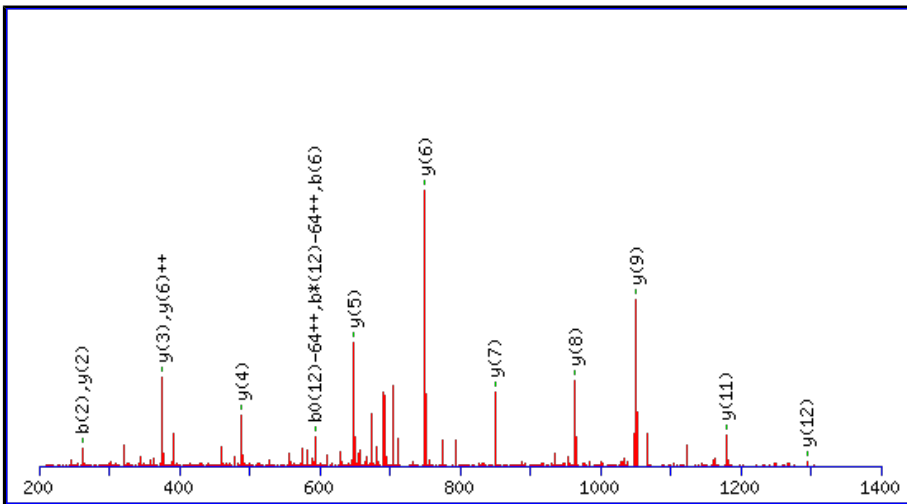

**Monoisotopic mass of neutral peptide Mr(calc):** 1440.5973

**Fixed modifications:** Carbamidomethyl (C) (apply to specified residues or termini only)

**Variable modifications:**

**M1** : Oxidation (M), with neutral losses 0.0000(shown in table), 63.9983

**N6** : Deamidated (NQ)

**Ions Score:** 113 **Expect:** 2.2e-010

**Matches :** 15/190 fragment ions using 11 most intense peaks ([help](#))

| #  | b               | b <sup>++</sup> | b <sup>*</sup> | b <sup>*++</sup> | b <sup>0</sup> | b <sup>0++</sup> | Seq.     | y                | y <sup>++</sup> | y <sup>*</sup> | y <sup>*++</sup> | y <sup>0</sup> | y <sup>0++</sup> | #         |
|----|-----------------|-----------------|----------------|------------------|----------------|------------------|----------|------------------|-----------------|----------------|------------------|----------------|------------------|-----------|
| 1  | 148.0427        | 74.5250         |                |                  |                |                  | <b>M</b> |                  |                 |                |                  |                |                  | <b>13</b> |
| 2  | <b>263.0696</b> | 132.0384        |                |                  | 245.0591       | 123.0332         | <b>D</b> | <b>1294.5692</b> | 647.7882        | 1277.5427      | 639.2750         | 1276.5586      | 638.7830         | <b>12</b> |
| 3  | 320.0911        | 160.5492        |                |                  | 302.0805       | 151.5439         | <b>G</b> | <b>1179.5423</b> | 590.2748        | 1162.5157      | 581.7615         | 1161.5317      | 581.2695         | <b>11</b> |
| 4  | 391.1282        | 196.0677        |                |                  | 373.1176       | 187.0625         | <b>A</b> | 1122.5208        | 561.7640        | 1105.4942      | 553.2508         | 1104.5102      | 552.7588         | <b>10</b> |
| 5  | 478.1602        | 239.5838        |                |                  | 460.1497       | 230.5785         | <b>S</b> | <b>1051.4837</b> | 526.2455        | 1034.4571      | 517.7322         | 1033.4731      | 517.2402         | <b>9</b>  |
| 6  | <b>593.1872</b> | 297.0972        | 576.1606       | 288.5839         | 575.1766       | 288.0919         | <b>N</b> | <b>964.4517</b>  | 482.7295        | 947.4251       | 474.2162         | 946.4411       | 473.7242         | <b>8</b>  |
| 7  | 692.2556        | 346.6314        | 675.2290       | 338.1182         | 674.2450       | 337.6261         | <b>V</b> | <b>849.4247</b>  | 425.2160        | 832.3982       | 416.7027         | 831.4141       | 416.2107         | <b>7</b>  |
| 8  | 793.3033        | 397.1553        | 776.2767       | 388.6420         | 775.2927       | 388.1500         | <b>T</b> | <b>750.3563</b>  | <b>375.6818</b> | 733.3298       | 367.1685         | 732.3457       | 366.6765         | <b>6</b>  |
| 9  | 953.3339        | 477.1706        | 936.3074       | 468.6573         | 935.3233       | 468.1653         | <b>C</b> | <b>649.3086</b>  | 325.1579        | 632.2821       | 316.6447         | 631.2981       | 316.1527         | <b>5</b>  |
| 10 | 1066.4180       | 533.7126        | 1049.3914      | 525.1994         | 1048.4074      | 524.7073         | <b>I</b> | <b>489.2780</b>  | 245.1426        | 472.2514       | 236.6293         | 471.2674       | 236.1373         | <b>4</b>  |
| 11 | 1180.4609       | 590.7341        | 1163.4344      | 582.2208         | 1162.4503      | 581.7288         | <b>N</b> | <b>376.1939</b>  | 188.6006        | 359.1674       | 180.0873         | 358.1833       | 179.5953         | <b>3</b>  |
| 12 | 1267.4929       | 634.2501        | 1250.4664      | 625.7368         | 1249.4824      | 625.2448         | <b>S</b> | <b>262.1510</b>  | 131.5791        | 245.1244       | 123.0659         | 244.1404       | 122.5738         | <b>2</b>  |
| 13 |                 |                 |                |                  |                |                  | <b>R</b> | 175.1190         | 88.0631         | 158.0924       | 79.5498          |                |                  | <b>1</b>  |



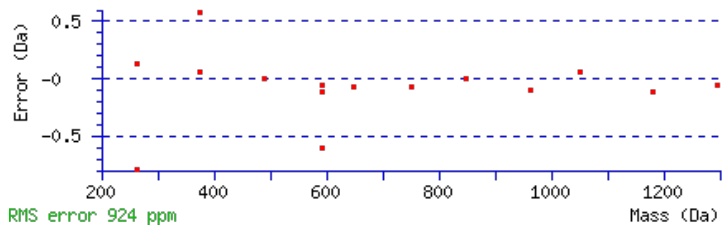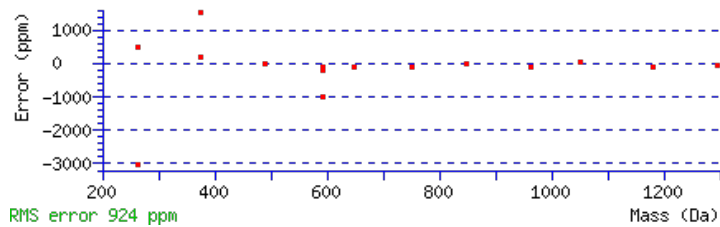

NCBI BLAST search of [MDGASNVTCINSR](#)

(Parameters: blastp, nr protein database, expect=20000, no filter, PAM30)

Other BLAST [web gateways](#)

**All matches to this query**

| Score | Mr(calc)  | Delta  | Sequence                         | Site Analysis        |
|-------|-----------|--------|----------------------------------|----------------------|
| 112.8 | 1440.5973 | 0.0001 | <a href="#">MDGASNVTCINSR</a>    | Deamidated N6 99.99% |
| 73.2  | 1440.5973 | 0.0001 | <a href="#">MDGASNVTCINSR</a>    | Deamidated N11 0.01% |
| 14.3  | 1439.5987 | 0.9987 | <a href="#">DGDNVMTWNSRK</a>     |                      |
| 9.9   | 1439.5987 | 0.9987 | <a href="#">WTNATNNMNLRS</a>     |                      |
| 8.8   | 1439.5987 | 0.9987 | <a href="#">WTNATNNMNLRS</a>     |                      |
| 7.5   | 1439.5947 | 1.0027 | <a href="#">TKSCNGGSGGGDGTGK</a> |                      |
| 5.3   | 1438.5956 | 2.0019 | <a href="#">QEDSMAEMEQLK</a>     |                      |
| 3.7   | 1438.5848 | 2.0126 | <a href="#">YQEQGGEASPSR</a>     |                      |

Mascot: <http://www.matrixscience.com/>

# MASCOT SCIENCE Mascot Search Results

## Peptide View

MS/MS Fragmentation of **MDGASNVTICNSR**

Found in **P08603** in **con\_Xuniprot\_HUMAN3**, CFAH\_HUMAN Complement factor H OS=Homo sapiens GN=CFH PE=1 SV=4

Match to Query 3058: 1424.603388 from(713.308970,2+) intensity(342887.8125) rtinseconds(535) scans(1030) index(12300)

Title: 111019\_Est\_ISCardio\_NMI\_YS\_G\_9Spectrum864\_scans\_1030

Data file C:\\mascot\\20140703\_Tmgf\_1D\\CSV\_UseAnalysis\\MasterCSV\\All\_Glyco\\mgf\\ptm\\UC18ERLIC\_PTM\_35D.mgf

Click mouse within plot area to zoom in by factor of two about that point

Or, to Da

Label all possible matches Label matches used for scoring

Show Y-axis

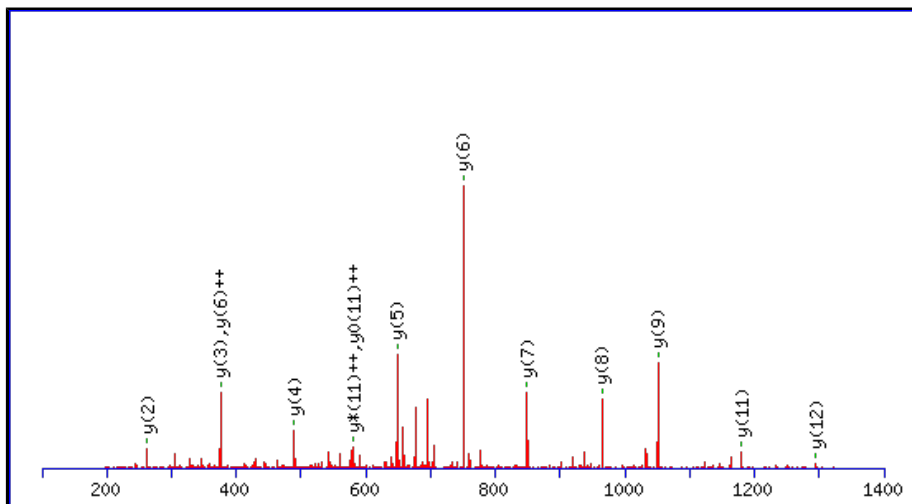

Monoisotopic mass of neutral peptide Mr(calc): 1424.6024

Fixed modifications: Carbamidomethyl (C) (apply to specified residues or termini only)

Variable modifications:

N6 : Deamidated (NQ)

Ions Score: 106 Expect: 1.4e-009

Matches : 13/130 fragment ions using 12 most intense peaks ([help](#))

| #  | b         | b <sup>++</sup> | b*        | b <sup>***</sup> | b <sup>0</sup> | b <sup>0++</sup> | Seq. | y         | y <sup>++</sup> | y*        | y <sup>***</sup> | y <sup>0</sup> | y <sup>0++</sup> | #  |
|----|-----------|-----------------|-----------|------------------|----------------|------------------|------|-----------|-----------------|-----------|------------------|----------------|------------------|----|
| 1  | 132.0478  | 66.5275         |           |                  |                |                  | M    |           |                 |           |                  |                |                  | 13 |
| 2  | 247.0747  | 124.0410        |           |                  | 229.0641       | 115.0357         | D    | 1294.5692 | 647.7882        | 1277.5427 | 639.2750         | 1276.5586      | 638.7830         | 12 |
| 3  | 304.0962  | 152.5517        |           |                  | 286.0856       | 143.5464         | G    | 1179.5423 | 590.2748        | 1162.5157 | 581.7615         | 1161.5317      | 581.2695         | 11 |
| 4  | 375.1333  | 188.0703        |           |                  | 357.1227       | 179.0650         | A    | 1122.5208 | 561.7640        | 1105.4942 | 553.2508         | 1104.5102      | 552.7588         | 10 |
| 5  | 462.1653  | 231.5863        |           |                  | 444.1547       | 222.5810         | S    | 1051.4837 | 526.2455        | 1034.4571 | 517.7322         | 1033.4731      | 517.2402         | 9  |
| 6  | 577.1923  | 289.0998        | 560.1657  | 280.5865         | 559.1817       | 280.0945         | N    | 964.4517  | 482.7295        | 947.4251  | 474.2162         | 946.4411       | 473.7242         | 8  |
| 7  | 676.2607  | 338.6340        | 659.2341  | 330.1207         | 658.2501       | 329.6287         | V    | 849.4247  | 425.2160        | 832.3982  | 416.7027         | 831.4141       | 416.2107         | 7  |
| 8  | 777.3083  | 389.1578        | 760.2818  | 380.6445         | 759.2978       | 380.1525         | T    | 750.3563  | 375.6818        | 733.3298  | 367.1685         | 732.3457       | 366.6765         | 6  |
| 9  | 937.3390  | 469.1731        | 920.3124  | 460.6599         | 919.3284       | 460.1679         | C    | 649.3086  | 325.1579        | 632.2821  | 316.6447         | 631.2981       | 316.1527         | 5  |
| 10 | 1050.4231 | 525.7152        | 1033.3965 | 517.2019         | 1032.4125      | 516.7099         | I    | 489.2780  | 245.1426        | 472.2514  | 236.6293         | 471.2674       | 236.1373         | 4  |
| 11 | 1164.4660 | 582.7366        | 1147.4394 | 574.2234         | 1146.4554      | 573.7313         | N    | 376.1939  | 188.6006        | 359.1674  | 180.0873         | 358.1833       | 179.5953         | 3  |
| 12 | 1251.4980 | 626.2526        | 1234.4715 | 617.7394         | 1233.4874      | 617.2474         | S    | 262.1510  | 131.5791        | 245.1244  | 123.0659         | 244.1404       | 122.5738         | 2  |
| 13 |           |                 |           |                  |                |                  | R    | 175.1190  | 88.0631         | 158.0924  | 79.5498          |                |                  | 1  |

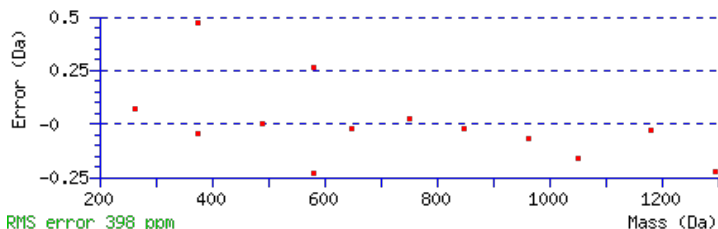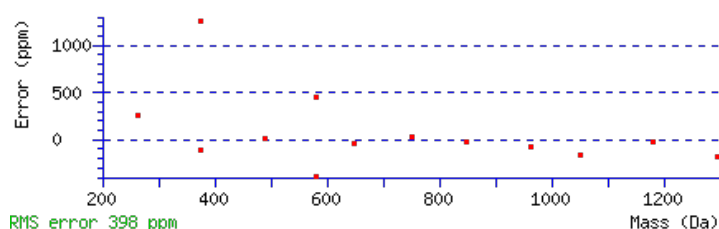

NCBI **BLAST** search of [MDGASNVTCINSR](#)

(Parameters: blastp, nr protein database, expect=20000, no filter, PAM30)

Other BLAST [web gateways](#)

**All matches to this query**

| Score | Mr(calc)  | Delta   | Sequence                       | Site Analysis        |
|-------|-----------|---------|--------------------------------|----------------------|
| 106.1 | 1424.6024 | 0.0010  | <a href="#">MDGASNVTCINSR</a>  | Deamidated N6 99.96% |
| 72.4  | 1424.6024 | 0.0010  | <a href="#">MDGASNVTCINSR</a>  | Deamidated N11 0.04% |
| 8.8   | 1423.6071 | 0.9963  | <a href="#">VCNSAGCAEKQAK</a>  |                      |
| 5.8   | 1423.6063 | 0.9971  | <a href="#">DQENSVQSSNSTK</a>  |                      |
| 5.5   | 1423.6063 | 0.9971  | <a href="#">AESSSDEAVADTSR</a> |                      |
| 4.0   | 1423.5997 | 1.0036  | <a href="#">MEGGGKPNSSNSR</a>  |                      |
| 4.0   | 1423.6037 | 0.9996  | <a href="#">WTNATNNMNLRS</a>   |                      |
| 4.0   | 1423.6063 | 0.9971  | <a href="#">DQENSVQSSNSTK</a>  |                      |
| 3.3   | 1422.5998 | 2.0036  | <a href="#">NKQESSEQQVDK</a>   |                      |
| 2.7   | 1424.6056 | -0.0022 | <a href="#">SSSDSWEPTSAGSK</a> |                      |

**Mascot:** <http://www.matrixscience.com/>

# MATRIX SCIENCE Mascot Search Results

## Peptide View

MS/MS Fragmentation of **IPCSQPPQIEHGTINSSR**

Found in **P08603** in **con\_Xuniprot\_HUMAN3**, CFAH\_HUMAN Complement factor H OS=Homo sapiens GN=CFH PE=1 SV=4

Match to Query 12567: 2020.970348 from(1011.492450,2+) intensity(54633.2422) rtinseconds(504) scans(1114) index(24361)

Title: 111019\_Est\_MI\_YS\_G\_06Spectrum954\_scans\_\_1114

Data file C:\\mascot\\20140703\_Tmgf\_1D\\CSV\_UseAnalysis\\MasterCSV\\All\_Glyco\\mgf\\ptm\\UC18ERLIC\_PTM\_35D.mgf

Click mouse within plot area to zoom in by factor of two about that point

Or, to Da

Label all possible matches Label matches used for scoring

Show Y-axis

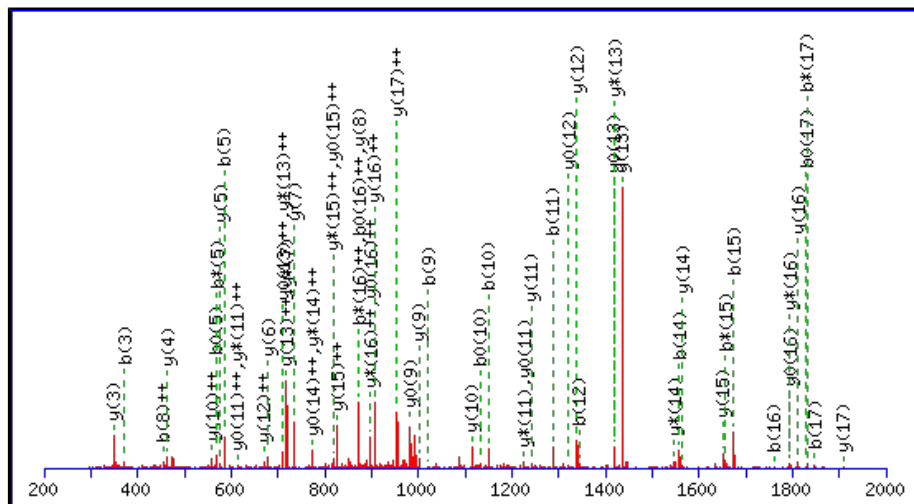

Monoisotopic mass of neutral peptide Mr(calc): 2020.9636

Fixed modifications: Carbamidomethyl (C) (apply to specified residues or termini only)

Variable modifications:

N15 : Deamidated (NQ)

Ions Score: 99 Expect: 3.1e-008

Matches : 60/188 fragment ions using 97 most intense peaks ([help](#))

| #  | b         | b <sup>++</sup> | b <sup>*</sup> | b <sup>*++</sup> | b <sup>0</sup> | b <sup>0++</sup> | Seq. | y         | y <sup>++</sup> | y <sup>*</sup> | y <sup>*++</sup> | y <sup>0</sup> | y <sup>0++</sup> | #  |
|----|-----------|-----------------|----------------|------------------|----------------|------------------|------|-----------|-----------------|----------------|------------------|----------------|------------------|----|
| 1  | 114.0913  | 57.5493         |                |                  |                |                  | I    |           |                 |                |                  |                |                  | 18 |
| 2  | 211.1441  | 106.0757        |                |                  |                |                  | P    | 1908.8869 | 954.9471        | 1891.8603      | 946.4338         | 1890.8763      | 945.9418         | 17 |
| 3  | 371.1748  | 186.0910        |                |                  |                |                  | C    | 1811.8341 | 906.4207        | 1794.8075      | 897.9074         | 1793.8235      | 897.4154         | 16 |
| 4  | 458.2068  | 229.6070        |                |                  | 440.1962       | 220.6017         | S    | 1651.8034 | 826.4054        | 1634.7769      | 817.8921         | 1633.7929      | 817.4001         | 15 |
| 5  | 586.2654  | 293.6363        | 569.2388       | 285.1230         | 568.2548       | 284.6310         | Q    | 1564.7714 | 782.8893        | 1547.7449      | 774.3761         | 1546.7608      | 773.8841         | 14 |
| 6  | 683.3181  | 342.1627        | 666.2916       | 333.6494         | 665.3076       | 333.1574         | P    | 1436.7128 | 718.8601        | 1419.6863      | 710.3468         | 1418.7023      | 709.8548         | 13 |
| 7  | 780.3709  | 390.6891        | 763.3443       | 382.1758         | 762.3603       | 381.6838         | P    | 1339.6601 | 670.3337        | 1322.6335      | 661.8204         | 1321.6495      | 661.3284         | 12 |
| 8  | 908.4295  | 454.7184        | 891.4029       | 446.2051         | 890.4189       | 445.7131         | Q    | 1242.6073 | 621.8073        | 1225.5808      | 613.2940         | 1224.5967      | 612.8020         | 11 |
| 9  | 1021.5135 | 511.2604        | 1004.4870      | 502.7471         | 1003.5030      | 502.2551         | I    | 1114.5487 | 557.7780        | 1097.5222      | 549.2647         | 1096.5382      | 548.7727         | 10 |
| 10 | 1150.5561 | 575.7817        | 1133.5296      | 567.2684         | 1132.5456      | 566.7764         | E    | 1001.4647 | 501.2360        | 984.4381       | 492.7227         | 983.4541       | 492.2307         | 9  |
| 11 | 1287.6150 | 644.3112        | 1270.5885      | 635.7979         | 1269.6045      | 635.3059         | H    | 872.4221  | 436.7147        | 855.3955       | 428.2014         | 854.4115       | 427.7094         | 8  |
| 12 | 1344.6365 | 672.8219        | 1327.6099      | 664.3086         | 1326.6259      | 663.8166         | G    | 735.3632  | 368.1852        | 718.3366       | 359.6719         | 717.3526       | 359.1799         | 7  |
| 13 | 1445.6842 | 723.3457        | 1428.6576      | 714.8325         | 1427.6736      | 714.3404         | T    | 678.3417  | 339.6745        | 661.3151       | 331.1612         | 660.3311       | 330.6692         | 6  |
| 14 | 1558.7682 | 779.8878        | 1541.7417      | 771.3745         | 1540.7577      | 770.8825         | I    | 577.2940  | 289.1506        | 560.2675       | 280.6374         | 559.2835       | 280.1454         | 5  |
| 15 | 1673.7952 | 837.4012        | 1656.7686      | 828.8880         | 1655.7846      | 828.3959         | N    | 464.2100  | 232.6086        | 447.1834       | 224.0953         | 446.1994       | 223.6033         | 4  |
| 16 | 1760.8272 | 880.9172        | 1743.8007      | 872.4040         | 1742.8166      | 871.9120         | S    | 349.1830  | 175.0951        | 332.1565       | 166.5819         | 331.1724       | 166.0899         | 3  |
| 17 | 1847.8592 | 924.4333        | 1830.8327      | 915.9200         | 1829.8487      | 915.4280         | S    | 262.1510  | 131.5791        | 245.1244       | 123.0659         | 244.1404       | 122.5738         | 2  |
| 18 |           |                 |                |                  |                |                  | R    | 175.1190  | 88.0631         | 158.0924       | 79.5498          |                |                  | 1  |

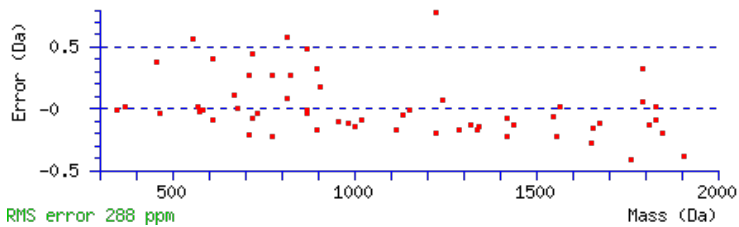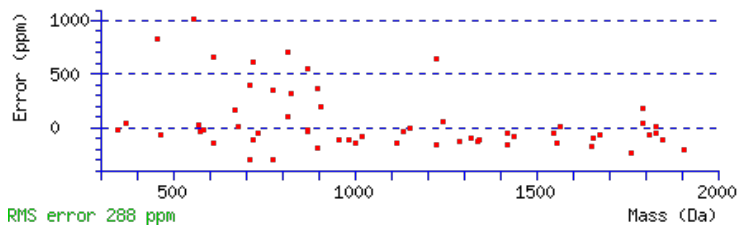

NCBI BLAST search of [IPCSQPPQIEHGTINSSR](#)

(Parameters: blastp, nr protein database, expect=20000, no filter, PAM30)

Other BLAST [web gateways](#)

**All matches to this query**

| Score | Mr(calc)  | Delta   | Sequence                             | Site Analysis          |
|-------|-----------|---------|--------------------------------------|------------------------|
| 99.0  | 2020.9636 | 0.0067  | <a href="#">IPCSQPPQIEHGTINSSR</a>   | Deamidated N15 100.00% |
| 47.4  | 2020.9636 | 0.0067  | <a href="#">IPCSQPPQIEHGTINSSR</a>   | Deamidated Q8 0.00%    |
| 30.7  | 2020.9636 | 0.0067  | <a href="#">IPCSQPPQIEHGTINSSR</a>   | Deamidated Q5 0.00%    |
| 2.7   | 2019.9572 | 1.0132  | <a href="#">IAVEQGTAVDMATYVTGSAH</a> |                        |
| 2.6   | 2020.9710 | -0.0007 | <a href="#">GLYRSEMHLHSVPECSK</a>    |                        |
| 2.5   | 2019.9605 | 1.0098  | <a href="#">QLLVEVERMECATPSDK</a>    |                        |
| 2.4   | 2019.9709 | 0.9995  | <a href="#">SVNRQVSEVDISQLSSNR</a>   |                        |
| 1.8   | 2019.9684 | 1.0019  | <a href="#">DTSCVNPPTVQNAVIVSR</a>   |                        |
| 0.3   | 2019.9670 | 1.0033  | <a href="#">AIIKVGDTEDNMDNILDK</a>   |                        |

Mascot: <http://www.matrixscience.com/>

# MATRIX SCIENCE Mascot Search Results

## Peptide View

MS/MS Fragmentation of **WDPEVNC SMAQIQLCPPPPQIPNSHNM TTTLN YR**

Found in **P08603** in **con\_Xuniprot\_HUMAN3**, CFAH\_HUMAN Complement factor H OS=Homo sapiens GN=CFH PE=1 SV=4

Match to Query 28329: 4010.815872 from(1337.945900,3+) intensity(21858.7637) rtinseconds(2018) scans(5054) index(12770)

Title: 111019\_Est\_ISCardio\_NMI\_YS\_G\_9Spectrum4423\_scans\_\_5054

Data file C:\mascot\20140703\_Tmgf\_1D\CSV\_UseAnalysis\MasterCSV\All\_Glyco\mgf\ptm\UC18ERLIC\_PTM\_35D.mgf

Click mouse within plot area to zoom in by factor of two about that point

Or, to Da

Label all possible matches Label matches used for scoring

Show Y-axis

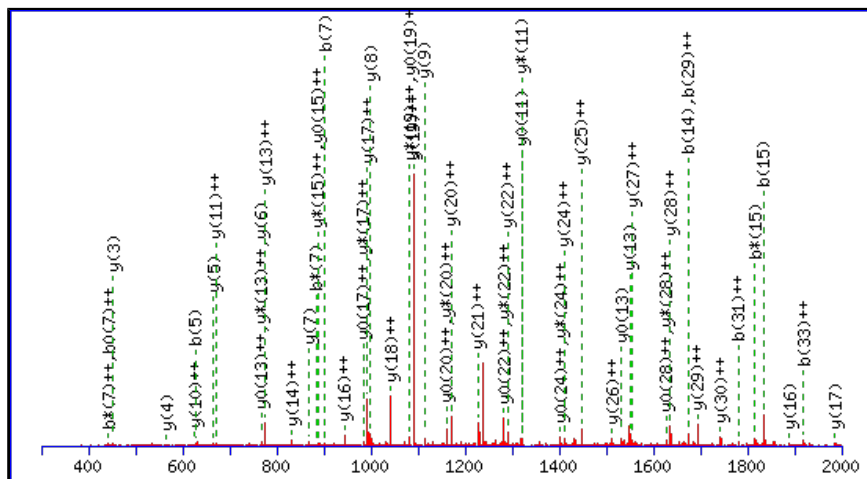

Monoisotopic mass of neutral peptide Mr(calc): 4010.8059

Fixed modifications: Carbamidomethyl (C) (apply to specified residues or termini only)

Variable modifications:

N23 : Deamidated (NQ)

N26 : Deamidated (NQ)

Ions Score: 98 Expect: 2.6e-008

Matches : 58/376 fragment ions using 101 most intense peaks ([help](#))

| #  | b                | b <sup>++</sup> | b <sup>*</sup>   | b <sup>*++</sup> | b <sup>0</sup> | b <sup>0++</sup> | Seq. | y                | y <sup>++</sup>  | y <sup>*</sup> | y <sup>*++</sup> | y <sup>0</sup>   | y <sup>0++</sup> | #  |
|----|------------------|-----------------|------------------|------------------|----------------|------------------|------|------------------|------------------|----------------|------------------|------------------|------------------|----|
| 1  | 187.0866         | 94.0469         |                  |                  |                |                  | W    |                  |                  |                |                  |                  |                  | 34 |
| 2  | 302.1135         | 151.5604        |                  |                  | 284.1030       | 142.5551         | D    | 3825.7339        | 1913.3706        | 3808.7074      | 1904.8573        | 3807.7234        | 1904.3653        | 33 |
| 3  | 399.1663         | 200.0868        |                  |                  | 381.1557       | 191.0815         | P    | 3710.7070        | 1855.8571        | 3693.6804      | 1847.3439        | 3692.6964        | 1846.8518        | 32 |
| 4  | 528.2089         | 264.6081        |                  |                  | 510.1983       | 255.6028         | E    | 3613.6542        | 1807.3308        | 3596.6277      | 1798.8175        | 3595.6437        | 1798.3255        | 31 |
| 5  | <b>627.2773</b>  | 314.1423        |                  |                  | 609.2667       | 305.1370         | V    | 3484.6116        | <b>1742.8095</b> | 3467.5851      | 1734.2962        | 3466.6011        | 1733.8042        | 30 |
| 6  | 741.3202         | 371.1638        | 724.2937         | 362.6505         | 723.3097       | 362.1585         | N    | 3385.5432        | <b>1693.2752</b> | 3368.5167      | 1684.7620        | 3367.5327        | 1684.2700        | 29 |
| 7  | <b>901.3509</b>  | 451.1791        | <b>884.3243</b>  | <b>442.6658</b>  | 883.3403       | <b>442.1738</b>  | C    | 3271.5003        | <b>1636.2538</b> | 3254.4737      | <b>1627.7405</b> | 3253.4897        | <b>1627.2485</b> | 28 |
| 8  | 988.3829         | 494.6951        | 971.3564         | 486.1818         | 970.3723       | 485.6898         | S    | 3111.4696        | <b>1556.2385</b> | 3094.4431      | 1547.7252        | 3093.4591        | 1547.2332        | 27 |
| 9  | 1119.4234        | 560.2153        | 1102.3968        | 551.7021         | 1101.4128      | 551.2101         | M    | 3024.4376        | <b>1512.7224</b> | 3007.4111      | 1504.2092        | 3006.4270        | 1503.7172        | 26 |
| 10 | 1190.4605        | 595.7339        | 1173.4340        | 587.2206         | 1172.4499      | 586.7286         | A    | 2893.3971        | <b>1447.2022</b> | 2876.3706      | 1438.6889        | 2875.3866        | 1438.1969        | 25 |
| 11 | 1318.5191        | 659.7632        | 1301.4925        | 651.2499         | 1300.5085      | 650.7579         | Q    | 2822.3600        | <b>1411.6836</b> | 2805.3335      | <b>1403.1704</b> | 2804.3494        | <b>1402.6784</b> | 24 |
| 12 | 1431.6031        | 716.3052        | 1414.5766        | 707.7919         | 1413.5926      | 707.2999         | I    | 2694.3014        | 1347.6544        | 2677.2749      | 1339.1411        | 2676.2909        | 1338.6491        | 23 |
| 13 | 1559.6617        | 780.3345        | 1542.6352        | 771.8212         | 1541.6512      | 771.3292         | Q    | 2581.2174        | <b>1291.1123</b> | 2564.1908      | <b>1282.5990</b> | 2563.2068        | <b>1282.1070</b> | 22 |
| 14 | <b>1672.7458</b> | 836.8765        | 1655.7192        | 828.3633         | 1654.7352      | 827.8713         | L    | 2453.1588        | <b>1227.0830</b> | 2436.1322      | 1218.5698        | 2435.1482        | 1218.0778        | 21 |
| 15 | <b>1832.7764</b> | 916.8919        | <b>1815.7499</b> | 908.3786         | 1814.7659      | 907.8866         | C    | 2340.0747        | <b>1170.5410</b> | 2323.0482      | <b>1162.0277</b> | 2322.0642        | <b>1161.5357</b> | 20 |
| 16 | 1929.8292        | 965.4182        | 1912.8027        | 956.9050         | 1911.8186      | 956.4130         | P    | 2180.0441        | <b>1090.5257</b> | 2163.0175      | <b>1082.0124</b> | 2162.0335        | <b>1081.5204</b> | 19 |
| 17 | 2026.8820        | 1013.9446       | 2009.8554        | 1005.4313        | 2008.8714      | 1004.9393        | P    | 2082.9913        | <b>1041.9993</b> | 2065.9648      | 1033.4860        | 2064.9808        | 1032.9940        | 18 |
| 18 | 2123.9347        | 1062.4710       | 2106.9082        | 1053.9577        | 2105.9242      | 1053.4657        | P    | <b>1985.9386</b> | <b>993.4729</b>  | 1968.9120      | <b>984.9596</b>  | 1967.9280        | <b>984.4676</b>  | 17 |
| 19 | 2220.9875        | 1110.9974       | 2203.9609        | 1102.4841        | 2202.9769      | 1101.9921        | P    | <b>1888.8858</b> | <b>944.9465</b>  | 1871.8592      | 936.4333         | 1870.8752        | 935.9413         | 16 |
| 20 | 2349.0461        | 1175.0267       | 2332.0195        | 1166.5134        | 2331.0355      | 1166.0214        | Q    | 1791.8330        | 896.4202         | 1774.8065      | <b>887.9069</b>  | 1773.8225        | <b>887.4149</b>  | 15 |
| 21 | 2462.1301        | 1231.5687       | 2445.1036        | 1223.0554        | 2444.1196      | 1222.5634        | I    | 1663.7744        | <b>832.3909</b>  | 1646.7479      | 823.8776         | 1645.7639        | 823.3856         | 14 |
| 22 | 2559.1829        | 1280.0951       | 2542.1564        | 1271.5818        | 2541.1723      | 1271.0898        | P    | <b>1550.6904</b> | <b>775.8488</b>  | 1533.6638      | <b>767.3356</b>  | <b>1532.6798</b> | <b>766.8435</b>  | 13 |

|    |           |           |           |           |           |           |   |           |          |           |          |           |          |    |
|----|-----------|-----------|-----------|-----------|-----------|-----------|---|-----------|----------|-----------|----------|-----------|----------|----|
| 23 | 2674.2098 | 1337.6086 | 2657.1833 | 1329.0953 | 2656.1993 | 1328.6033 | N | 1453.6376 | 727.3224 | 1436.6111 | 718.8092 | 1435.6271 | 718.3172 | 12 |
| 24 | 2761.2419 | 1381.1246 | 2744.2153 | 1372.6113 | 2743.2313 | 1372.1193 | S | 1338.6107 | 669.8090 | 1321.5841 | 661.2957 | 1320.6001 | 660.8037 | 11 |
| 25 | 2898.3008 | 1449.6540 | 2881.2742 | 1441.1408 | 2880.2902 | 1440.6487 | H | 1251.5786 | 626.2930 | 1234.5521 | 617.7797 | 1233.5681 | 617.2877 | 10 |
| 26 | 3013.3277 | 1507.1675 | 2996.3012 | 1498.6542 | 2995.3172 | 1498.1622 | N | 1114.5197 | 557.7635 | 1097.4932 | 549.2502 | 1096.5092 | 548.7582 | 9  |
| 27 | 3144.3682 | 1572.6877 | 3127.3417 | 1564.1745 | 3126.3576 | 1563.6825 | M | 999.4928  | 500.2500 | 982.4662  | 491.7368 | 981.4822  | 491.2448 | 8  |
| 28 | 3245.4159 | 1623.2116 | 3228.3893 | 1614.6983 | 3227.4053 | 1614.2063 | T | 868.4523  | 434.7298 | 851.4258  | 426.2165 | 850.4417  | 425.7245 | 7  |
| 29 | 3346.4636 | 1673.7354 | 3329.4370 | 1665.2221 | 3328.4530 | 1664.7301 | T | 767.4046  | 384.2060 | 750.3781  | 375.6927 | 749.3941  | 375.2007 | 6  |
| 30 | 3447.5112 | 1724.2593 | 3430.4847 | 1715.7460 | 3429.5007 | 1715.2540 | T | 666.3570  | 333.6821 | 649.3304  | 325.1688 | 648.3464  | 324.6768 | 5  |
| 31 | 3560.5953 | 1780.8013 | 3543.5688 | 1772.2880 | 3542.5847 | 1771.7960 | L | 565.3093  | 283.1583 | 548.2827  | 274.6450 |           |          | 4  |
| 32 | 3674.6382 | 1837.8228 | 3657.6117 | 1829.3095 | 3656.6277 | 1828.8175 | N | 452.2252  | 226.6162 | 435.1987  | 218.1030 |           |          | 3  |
| 33 | 3837.7016 | 1919.3544 | 3820.6750 | 1910.8411 | 3819.6910 | 1910.3491 | Y | 338.1823  | 169.5948 | 321.1557  | 161.0815 |           |          | 2  |
| 34 |           |           |           |           |           |           | R | 175.1190  | 88.0631  | 158.0924  | 79.5498  |           |          | 1  |

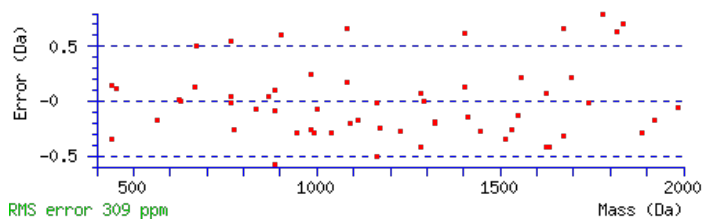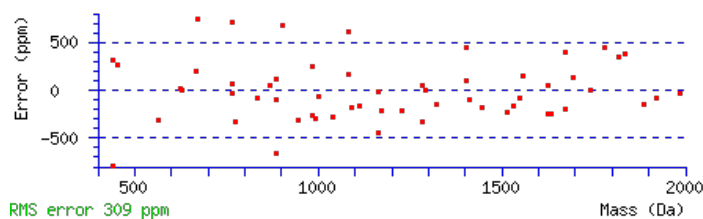

NCBI BLAST search of [WDPEVNC SMAQIQLCPPPPQIPNSHNMTTTLNYR](#)

(Parameters: blastp, nr protein database, expect=20000, no filter, PAM30)

Other BLAST [web gateways](#)

All matches to this query

| Score | Mr(calc)  | Delta  | Sequence                                            | Site Analysis              |
|-------|-----------|--------|-----------------------------------------------------|----------------------------|
| 97.7  | 4010.8059 | 0.0099 | <a href="#">WDPEVNC SMAQIQLCPPPPQIPNSHNMTTTLNYR</a> | Deamidated N23, N26 81.96% |
| 89.2  | 4010.8059 | 0.0099 | <a href="#">WDPEVNC SMAQIQLCPPPPQIPNSHNMTTTLNYR</a> | Deamidated N6, N32 11.74%  |
| 83.4  | 4010.8059 | 0.0099 | <a href="#">WDPEVNC SMAQIQLCPPPPQIPNSHNMTTTLNYR</a> | Deamidated N26, N32 3.06%  |
| 82.6  | 4010.8059 | 0.0099 | <a href="#">WDPEVNC SMAQIQLCPPPPQIPNSHNMTTTLNYR</a> | Deamidated Q20, N23 2.58%  |
| 81.8  | 4009.8219 | 0.9939 | <a href="#">WDPEVNC SMAQIQLCPPPPQIPNSHNMTTTLNYR</a> |                            |
| 71.6  | 4009.8219 | 0.9939 | <a href="#">WDPEVNC SMAQIQLCPPPPQIPNSHNMTTTLNYR</a> |                            |
| 69.2  | 4009.8219 | 0.9939 | <a href="#">WDPEVNC SMAQIQLCPPPPQIPNSHNMTTTLNYR</a> |                            |
| 68.5  | 4010.8059 | 0.0099 | <a href="#">WDPEVNC SMAQIQLCPPPPQIPNSHNMTTTLNYR</a> | Deamidated Q13, Q20 0.10%  |
| 66.5  | 4010.8059 | 0.0099 | <a href="#">WDPEVNC SMAQIQLCPPPPQIPNSHNMTTTLNYR</a> | Deamidated N6, Q11 0.06%   |
| 64.6  | 4010.8059 | 0.0099 | <a href="#">WDPEVNC SMAQIQLCPPPPQIPNSHNMTTTLNYR</a> | Deamidated Q11, Q13 0.04%  |

Mascot: <http://www.matrixscience.com/>



# MATRIX SCIENCE Mascot Search Results

## Peptide View

MS/MS Fragmentation of **WDPEVNC SMAQIQLCPPPPQIPNSHNM TTTLNYR**

Found in **P08603** in **con\_Xuniprot\_HUMAN3**, CFAH\_HUMAN Complement factor H OS=Homo sapiens GN=CFH PE=1 SV=4

Match to Query 28360: 4043.810652 from(1348.944160,3+) intensity(21335.4180) rtinseconds(1948) scans(4577) index(16843)

Title: 111019\_Est\_MI\_YP\_G\_06Spectrum3797\_scans\_\_4577

Data file C:\mascot\20140703\_Tmgf\_1D\CSV\_UseAnalysis\MasterCSV\All\_Glyco\mgf\ptm\UC18ERLIC\_PTM\_35D.mgf

Click mouse within plot area to zoom in by factor of two about that point

Or, to Da

Label all possible matches Label matches used for scoring

Show Y-axis

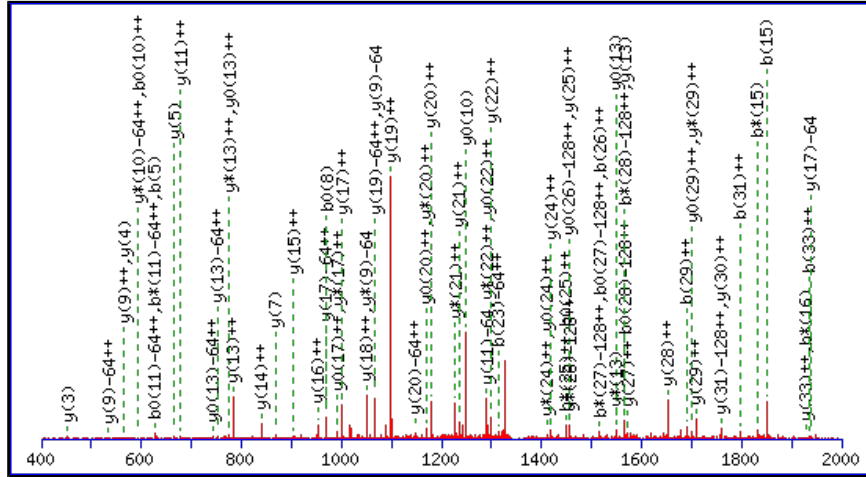

Monoisotopic mass of neutral peptide Mr(calc): 4042.7958

Fixed modifications: Carbamidomethyl (C) (apply to specified residues or termini only)

Variable modifications:

M9 : Oxidation (M), with neutral losses 0.0000 (shown in table), 63.9983

N23 : Deamidated (NQ)

N26 : Deamidated (NQ)

M27 : Oxidation (M), with neutral losses 0.0000 (shown in table), 63.9983

Ions Score: 97 Expect: 2.2e-008

Matches : 73/682 fragment ions using 96 most intense peaks ([help](#))

| #  | b         | b <sup>++</sup> | b <sup>*</sup> | b <sup>*++</sup> | b <sup>0</sup> | b <sup>0++</sup> | Seq. | y         | y <sup>++</sup> | y <sup>*</sup> | y <sup>*++</sup> | y <sup>0</sup> | y <sup>0++</sup> | #  |
|----|-----------|-----------------|----------------|------------------|----------------|------------------|------|-----------|-----------------|----------------|------------------|----------------|------------------|----|
| 1  | 187.0866  | 94.0469         |                |                  |                |                  | W    |           |                 |                |                  |                |                  | 34 |
| 2  | 302.1135  | 151.5604        |                |                  | 284.1030       | 142.5551         | D    | 3857.7238 | 1929.3655       | 3840.6972      | 1920.8522        | 3839.7132      | 1920.3602        | 33 |
| 3  | 399.1663  | 200.0868        |                |                  | 381.1557       | 191.0815         | P    | 3742.6968 | 1871.8520       | 3725.6703      | 1863.3388        | 3724.6863      | 1862.8468        | 32 |
| 4  | 528.2089  | 264.6081        |                |                  | 510.1983       | 255.6028         | E    | 3645.6441 | 1823.3257       | 3628.6175      | 1814.8124        | 3627.6335      | 1814.3204        | 31 |
| 5  | 627.2773  | 314.1423        |                |                  | 609.2667       | 305.1370         | V    | 3516.6015 | 1758.8044       | 3499.5749      | 1750.2911        | 3498.5909      | 1749.7991        | 30 |
| 6  | 741.3202  | 371.1638        | 724.2937       | 362.6505         | 723.3097       | 362.1585         | N    | 3417.5330 | 1709.2702       | 3400.5065      | 1700.7569        | 3399.5225      | 1700.2649        | 29 |
| 7  | 901.3509  | 451.1791        | 884.3243       | 442.6658         | 883.3403       | 442.1738         | C    | 3303.4901 | 1652.2487       | 3286.4636      | 1643.7354        | 3285.4796      | 1643.2434        | 28 |
| 8  | 988.3829  | 494.6951        | 971.3564       | 486.1818         | 970.3723       | 485.6898         | S    | 3143.4595 | 1572.2334       | 3126.4329      | 1563.7201        | 3125.4489      | 1563.2281        | 27 |
| 9  | 1135.4183 | 568.2128        | 1118.3918      | 559.6995         | 1117.4077      | 559.2075         | M    | 3056.4274 | 1528.7174       | 3039.4009      | 1520.2041        | 3038.4169      | 1519.7121        | 26 |
| 10 | 1206.4554 | 603.7313        | 1189.4289      | 595.2181         | 1188.4449      | 594.7261         | A    | 2909.3920 | 1455.1997       | 2892.3655      | 1446.6864        | 2891.3815      | 1446.1944        | 25 |
| 11 | 1334.5140 | 667.7606        | 1317.4875      | 659.2474         | 1316.5034      | 658.7554         | Q    | 2838.3549 | 1419.6811       | 2821.3284      | 1411.1678        | 2820.3444      | 1410.6758        | 24 |
| 12 | 1447.5981 | 724.3027        | 1430.5715      | 715.7894         | 1429.5875      | 715.2974         | I    | 2710.2964 | 1355.6518       | 2693.2698      | 1347.1385        | 2692.2858      | 1346.6465        | 23 |
| 13 | 1575.6566 | 788.3320        | 1558.6301      | 779.8187         | 1557.6461      | 779.3267         | Q    | 2597.2123 | 1299.1098       | 2580.1857      | 1290.5965        | 2579.2017      | 1290.1045        | 22 |
| 14 | 1688.7407 | 844.8740        | 1671.7142      | 836.3607         | 1670.7301      | 835.8687         | L    | 2469.1537 | 1235.0805       | 2452.1272      | 1226.5672        | 2451.1431      | 1226.0752        | 21 |
| 15 | 1848.7714 | 924.8893        | 1831.7448      | 916.3760         | 1830.7608      | 915.8840         | C    | 2356.0696 | 1178.5385       | 2339.0431      | 1170.0252        | 2338.0591      | 1169.5332        | 20 |
| 16 | 1945.8241 | 973.4157        | 1928.7976      | 964.9024         | 1927.8136      | 964.4104         | P    | 2196.0390 | 1098.5231       | 2179.0124      | 1090.0099        | 2178.0284      | 1089.5179        | 19 |
| 17 | 2042.8769 | 1021.9421       | 2025.8503      | 1013.4288        | 2024.8663      | 1012.9368        | P    | 2098.9862 | 1049.9968       | 2081.9597      | 1041.4835        | 2080.9757      | 1040.9915        | 18 |
| 18 | 2139.9296 | 1070.4685       | 2122.9031      | 1061.9552        | 2121.9191      | 1061.4632        | P    | 2001.9335 | 1001.4704       | 1984.9069      | 992.9571         | 1983.9229      | 992.4651         | 17 |
| 19 | 2236.9824 | 1118.9948       | 2219.9559      | 1110.4816        | 2218.9718      | 1109.9896        | P    | 1904.8807 | 952.9440        | 1887.8542      | 944.4307         | 1886.8701      | 943.9387         | 16 |
| 20 | 2365.0410 | 1183.0241       | 2348.0144      | 1174.5109        | 2347.0304      | 1174.0188        | Q    | 1807.8279 | 904.4176        | 1790.8014      | 895.9043         | 1789.8174      | 895.4123         | 15 |
| 21 | 2478.1251 | 1239.5662       | 2461.0985      | 1231.0529        | 2460.1145      | 1230.5609        | I    | 1679.7694 | 840.3883        | 1662.7428      | 831.8750         | 1661.7588      | 831.3830         | 14 |

|    |           |           |           |           |           |           |   |           |          |           |          |           |          |    |
|----|-----------|-----------|-----------|-----------|-----------|-----------|---|-----------|----------|-----------|----------|-----------|----------|----|
| 22 | 2575.1778 | 1288.0925 | 2558.1513 | 1279.5793 | 2557.1673 | 1279.0873 | P | 1566.6853 | 783.8463 | 1549.6587 | 775.3330 | 1548.6747 | 774.8410 | 13 |
| 23 | 2690.2048 | 1345.6060 | 2673.1782 | 1337.0927 | 2672.1942 | 1336.6007 | N | 1469.6325 | 735.3199 | 1452.6060 | 726.8066 | 1451.6220 | 726.3146 | 12 |
| 24 | 2777.2368 | 1389.1220 | 2760.2102 | 1380.6088 | 2759.2262 | 1380.1167 | S | 1354.6056 | 677.8064 | 1337.5790 | 669.2932 | 1336.5950 | 668.8012 | 11 |
| 25 | 2914.2957 | 1457.6515 | 2897.2691 | 1449.1382 | 2896.2851 | 1448.6462 | H | 1267.5736 | 634.2904 | 1250.5470 | 625.7771 | 1249.5630 | 625.2851 | 10 |
| 26 | 3029.3226 | 1515.1650 | 3012.2961 | 1506.6517 | 3011.3121 | 1506.1597 | N | 1130.5147 | 565.7610 | 1113.4881 | 557.2477 | 1112.5041 | 556.7557 | 9  |
| 27 | 3176.3580 | 1588.6827 | 3159.3315 | 1580.1694 | 3158.3475 | 1579.6774 | M | 1015.4877 | 508.2475 | 998.4612  | 499.7342 | 997.4771  | 499.2422 | 8  |
| 28 | 3277.4057 | 1639.2065 | 3260.3792 | 1630.6932 | 3259.3952 | 1630.2012 | T | 868.4523  | 434.7298 | 851.4258  | 426.2165 | 850.4417  | 425.7245 | 7  |
| 29 | 3378.4534 | 1689.7303 | 3361.4269 | 1681.2171 | 3360.4428 | 1680.7251 | T | 767.4046  | 384.2060 | 750.3781  | 375.6927 | 749.3941  | 375.2007 | 6  |
| 30 | 3479.5011 | 1740.2542 | 3462.4745 | 1731.7409 | 3461.4905 | 1731.2489 | T | 666.3570  | 333.6821 | 649.3304  | 325.1688 | 648.3464  | 324.6768 | 5  |
| 31 | 3592.5851 | 1796.7962 | 3575.5586 | 1788.2829 | 3574.5746 | 1787.7909 | L | 565.3093  | 283.1583 | 548.2827  | 274.6450 |           |          | 4  |
| 32 | 3706.6281 | 1853.8177 | 3689.6015 | 1845.3044 | 3688.6175 | 1844.8124 | N | 452.2252  | 226.6162 | 435.1987  | 218.1030 |           |          | 3  |
| 33 | 3869.6914 | 1935.3493 | 3852.6648 | 1926.8361 | 3851.6808 | 1926.3441 | Y | 338.1823  | 169.5948 | 321.1557  | 161.0815 |           |          | 2  |
| 34 |           |           |           |           |           |           | R | 175.1190  | 88.0631  | 158.0924  | 79.5498  |           |          | 1  |

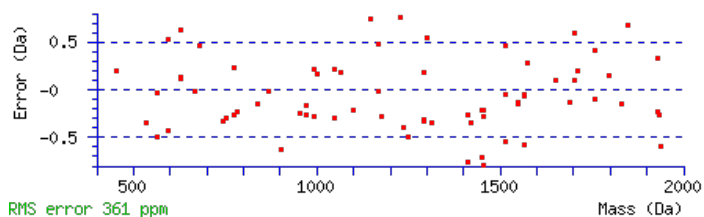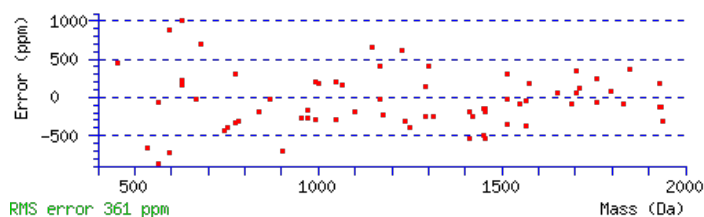

NCBI BLAST search of [WDPEVNC SMAQIQLCPPPQIPNSHNMTTTLNYR](#)

(Parameters: blastp, nr protein database, expect=20000, no filter, PAM30)

Other BLAST [web gateways](#)

All matches to this query

| Score | Mr(calc)  | Delta  | Sequence                                           | Site Analysis              |
|-------|-----------|--------|----------------------------------------------------|----------------------------|
| 97.0  | 4042.7958 | 1.0149 | <a href="#">WDPEVNC SMAQIQLCPPPQIPNSHNMTTTLNYR</a> | Deamidated N23, N26 90.65% |
| 85.8  | 4042.7958 | 1.0149 | <a href="#">WDPEVNC SMAQIQLCPPPQIPNSHNMTTTLNYR</a> | Deamidated Q20, N23 6.91%  |
| 80.7  | 4042.7958 | 1.0149 | <a href="#">WDPEVNC SMAQIQLCPPPQIPNSHNMTTTLNYR</a> | Deamidated Q13, Q20 2.14%  |
| 72.3  | 4041.8118 | 1.9989 | <a href="#">WDPEVNC SMAQIQLCPPPQIPNSHNMTTTLNYR</a> |                            |
| 67.5  | 4042.7958 | 1.0149 | <a href="#">WDPEVNC SMAQIQLCPPPQIPNSHNMTTTLNYR</a> | Deamidated Q11, Q13 0.10%  |
| 67.1  | 4042.7958 | 1.0149 | <a href="#">WDPEVNC SMAQIQLCPPPQIPNSHNMTTTLNYR</a> | Deamidated N6, Q11 0.09%   |
| 64.3  | 4041.8118 | 1.9989 | <a href="#">WDPEVNC SMAQIQLCPPPQIPNSHNMTTTLNYR</a> |                            |
| 62.9  | 4042.7958 | 1.0149 | <a href="#">WDPEVNC SMAQIQLCPPPQIPNSHNMTTTLNYR</a> | Deamidated N6, N32 0.04%   |
| 62.0  | 4041.8118 | 1.9989 | <a href="#">WDPEVNC SMAQIQLCPPPQIPNSHNMTTTLNYR</a> |                            |
| 55.4  | 4041.8118 | 1.9989 | <a href="#">WDPEVNC SMAQIQLCPPPQIPNSHNMTTTLNYR</a> |                            |

Mascot: <http://www.matrixscience.com/>

# MATRIX SCIENCE Mascot Search Results

## Peptide View

MS/MS Fragmentation of **I SEENETTCYMGK**

Found in **P08603** in **con\_Xuniprot\_HUMAN3**, CFAH\_HUMAN Complement factor H OS=Homo sapiens GN=CFH PE=1 SV=4

Match to Query 7227: 1561.630188 from(781.822370,2+) intensity(35270.2813) rtinseconds(592) scans(1022) index(28338)

Title: 111019\_Est\_MI\_YS\_G\_13Spectrum822\_scans\_1022

Data file C:\\mascot\\20140703\_Tmgf\_1D\\CSV\_UseAnalysis\\MasterCSV\\All\_Glyco\\mgf\\ptm\\UC18ERLIC\_PTM\_35D.mgf

Click mouse within plot area to zoom in by factor of two about that point

Or, to Da

Label all possible matches Label matches used for scoring

Show Y-axis

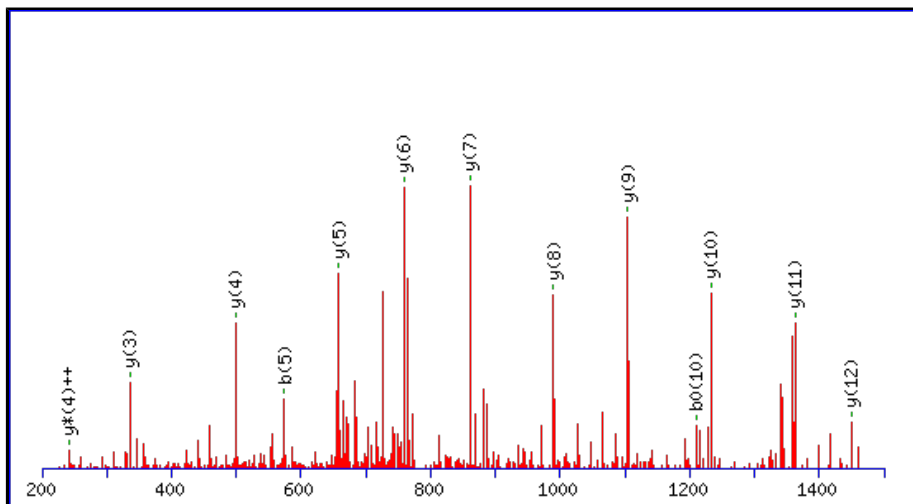

Monoisotopic mass of neutral peptide Mr(calc): 1561.6276

Fixed modifications: Carbamidomethyl (C) (apply to specified residues or termini only)

Variable modifications:

N5 : Deamidated (NQ)

Ions Score: 95 Expect: 8.7e-009

Matches : 13/124 fragment ions using 13 most intense peaks ([help](#))

| #  | b         | b <sup>++</sup> | b*        | b <sup>+++</sup> | b <sup>0</sup> | b <sup>0++</sup> | Seq. | y         | y <sup>++</sup> | y*        | y <sup>+++</sup> | y <sup>0</sup> | y <sup>0++</sup> | #  |
|----|-----------|-----------------|-----------|------------------|----------------|------------------|------|-----------|-----------------|-----------|------------------|----------------|------------------|----|
| 1  | 114.0913  | 57.5493         |           |                  |                |                  | I    |           |                 |           |                  |                |                  | 13 |
| 2  | 201.1234  | 101.0653        |           |                  | 183.1128       | 92.0600          | S    | 1449.5508 | 725.2791        | 1432.5243 | 716.7658         | 1431.5403      | 716.2738         | 12 |
| 3  | 330.1660  | 165.5866        |           |                  | 312.1554       | 156.5813         | E    | 1362.5188 | 681.7630        | 1345.4923 | 673.2498         | 1344.5082      | 672.7578         | 11 |
| 4  | 459.2086  | 230.1079        |           |                  | 441.1980       | 221.1026         | E    | 1233.4762 | 617.2417        | 1216.4497 | 608.7285         | 1215.4657      | 608.2365         | 10 |
| 5  | 574.2355  | 287.6214        | 557.2089  | 279.1081         | 556.2249       | 278.6161         | N    | 1104.4336 | 552.7205        | 1087.4071 | 544.2072         | 1086.4231      | 543.7152         | 9  |
| 6  | 703.2781  | 352.1427        | 686.2515  | 343.6294         | 685.2675       | 343.1374         | E    | 989.4067  | 495.2070        | 972.3801  | 486.6937         | 971.3961       | 486.2017         | 8  |
| 7  | 804.3258  | 402.6665        | 787.2992  | 394.1532         | 786.3152       | 393.6612         | T    | 860.3641  | 430.6857        | 843.3375  | 422.1724         | 842.3535       | 421.6804         | 7  |
| 8  | 905.3734  | 453.1904        | 888.3469  | 444.6771         | 887.3629       | 444.1851         | T    | 759.3164  | 380.1618        | 742.2899  | 371.6486         | 741.3058       | 371.1566         | 6  |
| 9  | 1065.4041 | 533.2057        | 1048.3775 | 524.6924         | 1047.3935      | 524.2004         | C    | 658.2687  | 329.6380        | 641.2422  | 321.1247         |                |                  | 5  |
| 10 | 1228.4674 | 614.7374        | 1211.4409 | 606.2241         | 1210.4569      | 605.7321         | Y    | 498.2381  | 249.6227        | 481.2115  | 241.1094         |                |                  | 4  |
| 11 | 1359.5079 | 680.2576        | 1342.4814 | 671.7443         | 1341.4973      | 671.2523         | M    | 335.1748  | 168.0910        | 318.1482  | 159.5777         |                |                  | 3  |
| 12 | 1416.5294 | 708.7683        | 1399.5028 | 700.2551         | 1398.5188      | 699.7630         | G    | 204.1343  | 102.5708        | 187.1077  | 94.0575          |                |                  | 2  |
| 13 |           |                 |           |                  |                |                  | K    | 147.1128  | 74.0600         | 130.0863  | 65.5468          |                |                  | 1  |

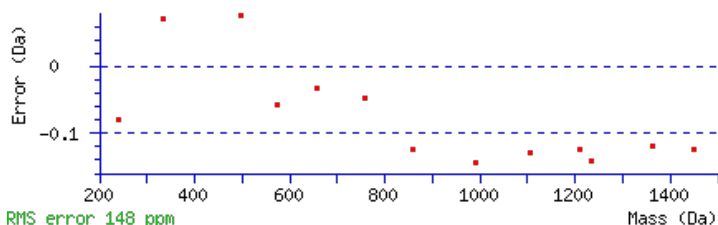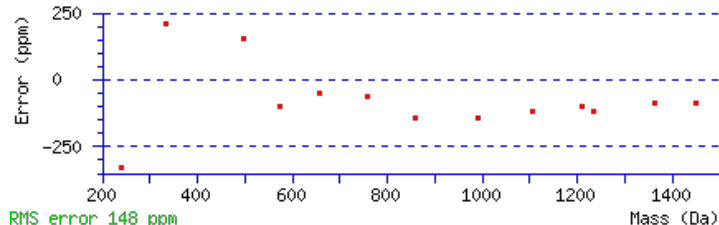

NCBI **BLAST** search of [ISEENETTCYMGK](#)

(Parameters: blastp, nr protein database, expect=20000, no filter, PAM30)

Other BLAST [web gateways](#)

**All matches to this query**

| Score | Mr(calc)  | Delta   | Sequence                        |
|-------|-----------|---------|---------------------------------|
| 94.6  | 1561.6276 | 0.0026  | <a href="#">ISEENETTCYMGK</a>   |
| 2.9   | 1561.6379 | -0.0078 | <a href="#">QQAQGEPASESGENK</a> |
| 2.8   | 1561.6379 | -0.0078 | <a href="#">QQAQGEPASESGENK</a> |

Mascot: <http://www.matrixscience.com/>

# MASCOT SCIENCE Mascot Search Results

## Peptide View

MS/MS Fragmentation of **I SEENETTCYMGK**

Found in **P08603** in **con\_Xuniprot\_HUMAN3**, CFAH\_HUMAN Complement factor H OS=Homo sapiens GN=CFH PE=1 SV=4

Match to Query 7479: 1577.625948 from(789.820250,2+) intensity(93876.5156) rtinseconds(657) scans(1122) index(16633)

Title: 111019\_Est\_MI\_YP\_G\_06Spectrum917\_scans\_\_1122

Data file C:\mascot\20140703\_Tmgf\_1D\CSV\_UseAnalysis\MasterCSV\All\_Glyco\mgf\ptm\UC18ERLIC\_PTM\_35D.mgf

Click mouse within plot area to zoom in by factor of two about that point

Or, to Da

Label all possible matches Label matches used for scoring

Show Y-axis

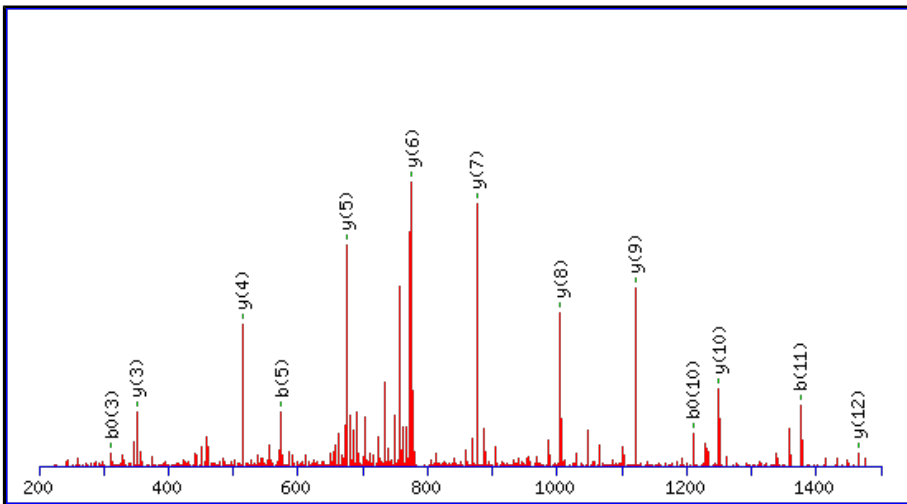

**Monoisotopic mass of neutral peptide Mr(calc):** 1577.6225

**Fixed modifications:** Carbamidomethyl (C) (apply to specified residues or termini only)

**Variable modifications:**

N5 : Deamidated (NQ)

M11 : Oxidation (M), with neutral losses 0.0000(shown in table), 63.9983

**Ions Score:** 94 **Expect:** 6e-009

**Matches :** 13/190 fragment ions using 13 most intense peaks ([help](#))

| #  | b                | b <sup>++</sup> | b*        | b <sup>+++</sup> | b <sup>0</sup>   | b <sup>0++</sup> | Seq. | y                | y <sup>++</sup> | y*        | y <sup>+++</sup> | y <sup>0</sup> | y <sup>0++</sup> | #  |
|----|------------------|-----------------|-----------|------------------|------------------|------------------|------|------------------|-----------------|-----------|------------------|----------------|------------------|----|
| 1  | 114.0913         | 57.5493         |           |                  |                  |                  | I    |                  |                 |           |                  |                |                  | 13 |
| 2  | 201.1234         | 101.0653        |           |                  | 183.1128         | 92.0600          | S    | <b>1465.5458</b> | 733.2765        | 1448.5192 | 724.7632         | 1447.5352      | 724.2712         | 12 |
| 3  | 330.1660         | 165.5866        |           |                  | <b>312.1554</b>  | 156.5813         | E    | 1378.5137        | 689.7605        | 1361.4872 | 681.2472         | 1360.5032      | 680.7552         | 11 |
| 4  | 459.2086         | 230.1079        |           |                  | 441.1980         | 221.1026         | E    | <b>1249.4711</b> | 625.2392        | 1232.4446 | 616.7259         | 1231.4606      | 616.2339         | 10 |
| 5  | <b>574.2355</b>  | 287.6214        | 557.2089  | 279.1081         | 556.2249         | 278.6161         | N    | <b>1120.4285</b> | 560.7179        | 1103.4020 | 552.2046         | 1102.4180      | 551.7126         | 9  |
| 6  | 703.2781         | 352.1427        | 686.2515  | 343.6294         | 685.2675         | 343.1374         | E    | <b>1005.4016</b> | 503.2044        | 988.3750  | 494.6912         | 987.3910       | 494.1992         | 8  |
| 7  | 804.3258         | 402.6665        | 787.2992  | 394.1532         | 786.3152         | 393.6612         | T    | <b>876.3590</b>  | 438.6831        | 859.3325  | 430.1699         | 858.3484       | 429.6779         | 7  |
| 8  | 905.3734         | 453.1904        | 888.3469  | 444.6771         | 887.3629         | 444.1851         | T    | <b>775.3113</b>  | 388.1593        | 758.2848  | 379.6460         | 757.3008       | 379.1540         | 6  |
| 9  | 1065.4041        | 533.2057        | 1048.3775 | 524.6924         | 1047.3935        | 524.2004         | C    | <b>674.2636</b>  | 337.6355        | 657.2371  | 329.1222         |                |                  | 5  |
| 10 | 1228.4674        | 614.7374        | 1211.4409 | 606.2241         | <b>1210.4569</b> | 605.7321         | Y    | <b>514.2330</b>  | 257.6201        | 497.2064  | 249.1069         |                |                  | 4  |
| 11 | <b>1375.5028</b> | 688.2551        | 1358.4763 | 679.7418         | 1357.4923        | 679.2498         | M    | <b>351.1697</b>  | 176.0885        | 334.1431  | 167.5752         |                |                  | 3  |
| 12 | 1432.5243        | 716.7658        | 1415.4977 | 708.2525         | 1414.5137        | 707.7605         | G    | 204.1343         | 102.5708        | 187.1077  | 94.0575          |                |                  | 2  |
| 13 |                  |                 |           |                  |                  |                  | K    | 147.1128         | 74.0600         | 130.0863  | 65.5468          |                |                  | 1  |

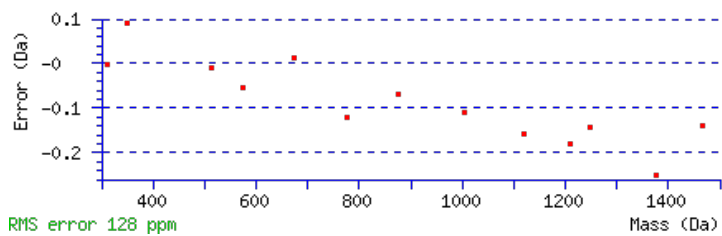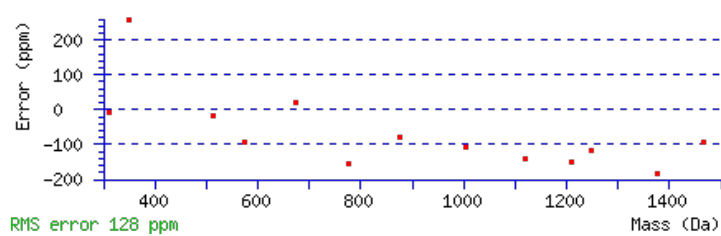

NCBI **BLAST** search of [ISEENETTCYMGK](#)

(Parameters: blastp, nr protein database, expect=20000, no filter, PAM30)

Other BLAST [web gateways](#)

**All matches to this query**

| Score | Mr(calc)  | Delta  | Sequence                      |
|-------|-----------|--------|-------------------------------|
| 93.7  | 1577.6225 | 0.0034 | <a href="#">ISEENETTCYMGK</a> |

Mascot: <http://www.matrixscience.com/>

# MATRIX SCIENCE Mascot Search Results

## Peptide View

MS/MS Fragmentation of **WDPEVNC SMAIQLCPPPPQIPNSHNM TTTLN YR**

Found in **P08603** in **con\_Xuniprot\_HUMAN3**, CFAH\_HUMAN Complement factor H OS=Homo sapiens GN=CFH PE=1 SV=4

Match to Query 28361: 4043.837172 from(1348.953000,3+) intensity(0.0000) rtinseconds(1686) scans(4222) index(3821)

Title: 111019\_Est\_ISCardio\_NMI\_YP\_G\_6Spectrum3465\_scans\_4222

Data file C:\mascot\20140703\_Tmgf\_1D\CSV\_UseAnalysis\MasterCSV\All\_Glyco\mgf\ptm\UC18ERLIC\_PTM\_35D.mgf

Click mouse within plot area to zoom in by factor of two about that point

Or, to Da

Label all possible matches Label matches used for scoring

Show Y-axis

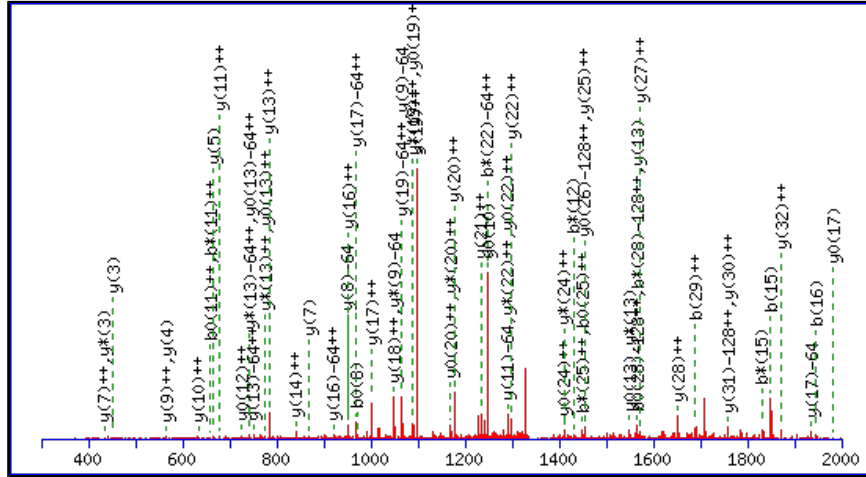

Monoisotopic mass of neutral peptide Mr(calc): 4041.8118

Fixed modifications: Carbamidomethyl (C) (apply to specified residues or termini only)

Variable modifications:

M9 : Oxidation (M), with neutral losses 0.0000(shown in table), 63.9983

N26 : Deamidated (NQ)

M27 : Oxidation (M), with neutral losses 0.0000(shown in table), 63.9983

Ions Score: 86 Expect: 3.5e-007

Matches : 65/682 fragment ions using 83 most intense peaks ([help](#))

| #  | b         | b <sup>++</sup> | b <sup>*</sup> | b <sup>*++</sup> | b <sup>0</sup> | b <sup>0++</sup> | Seq. | y         | y <sup>++</sup> | y <sup>*</sup> | y <sup>*++</sup> | y <sup>0</sup> | y <sup>0++</sup> | #  |
|----|-----------|-----------------|----------------|------------------|----------------|------------------|------|-----------|-----------------|----------------|------------------|----------------|------------------|----|
| 1  | 187.0866  | 94.0469         |                |                  |                |                  | W    |           |                 |                |                  |                |                  | 34 |
| 2  | 302.1135  | 151.5604        |                |                  | 284.1030       | 142.5551         | D    | 3856.7397 | 1928.8735       | 3839.7132      | 1920.3602        | 3838.7292      | 1919.8682        | 33 |
| 3  | 399.1663  | 200.0868        |                |                  | 381.1557       | 191.0815         | P    | 3741.7128 | 1871.3600       | 3724.6863      | 1862.8468        | 3723.7022      | 1862.3548        | 32 |
| 4  | 528.2089  | 264.6081        |                |                  | 510.1983       | 255.6028         | E    | 3644.6600 | 1822.8337       | 3627.6335      | 1814.3204        | 3626.6495      | 1813.8284        | 31 |
| 5  | 627.2773  | 314.1423        |                |                  | 609.2667       | 305.1370         | V    | 3515.6174 | 1758.3124       | 3498.5909      | 1749.7991        | 3497.6069      | 1749.3071        | 30 |
| 6  | 741.3202  | 371.1638        | 724.2937       | 362.6505         | 723.3097       | 362.1585         | N    | 3416.5490 | 1708.7782       | 3399.5225      | 1700.2649        | 3398.5385      | 1699.7729        | 29 |
| 7  | 901.3509  | 451.1791        | 884.3243       | 442.6658         | 883.3403       | 442.1738         | C    | 3302.5061 | 1651.7567       | 3285.4796      | 1643.2434        | 3284.4955      | 1642.7514        | 28 |
| 8  | 988.3829  | 494.6951        | 971.3564       | 486.1818         | 970.3723       | 485.6898         | S    | 3142.4755 | 1571.7414       | 3125.4489      | 1563.2281        | 3124.4649      | 1562.7361        | 27 |
| 9  | 1135.4183 | 568.2128        | 1118.3918      | 559.6995         | 1117.4077      | 559.2075         | M    | 3055.4434 | 1528.2254       | 3038.4169      | 1519.7121        | 3037.4329      | 1519.2201        | 26 |
| 10 | 1206.4554 | 603.7313        | 1189.4289      | 595.2181         | 1188.4449      | 594.7261         | A    | 2908.4080 | 1454.7077       | 2891.3815      | 1446.1944        | 2890.3975      | 1445.7024        | 25 |
| 11 | 1334.5140 | 667.7606        | 1317.4875      | 659.2474         | 1316.5034      | 658.7554         | Q    | 2837.3709 | 1419.1891       | 2820.3444      | 1410.6758        | 2819.3603      | 1410.1838        | 24 |
| 12 | 1447.5981 | 724.3027        | 1430.5715      | 715.7894         | 1429.5875      | 715.2974         | I    | 2709.3123 | 1355.1598       | 2692.2858      | 1346.6465        | 2691.3018      | 1346.1545        | 23 |
| 13 | 1575.6566 | 788.3320        | 1558.6301      | 779.8187         | 1557.6461      | 779.3267         | Q    | 2596.2283 | 1298.6178       | 2579.2017      | 1290.1045        | 2578.2177      | 1289.6125        | 22 |
| 14 | 1688.7407 | 844.8740        | 1671.7142      | 836.3607         | 1670.7301      | 835.8687         | L    | 2468.1697 | 1234.5885       | 2451.1431      | 1226.0752        | 2450.1591      | 1225.5832        | 21 |
| 15 | 1848.7714 | 924.8893        | 1831.7448      | 916.3760         | 1830.7608      | 915.8840         | C    | 2355.0856 | 1178.0465       | 2338.0591      | 1169.5332        | 2337.0751      | 1169.0412        | 20 |
| 16 | 1945.8241 | 973.4157        | 1928.7976      | 964.9024         | 1927.8136      | 964.4104         | P    | 2195.0550 | 1098.0311       | 2178.0284      | 1089.5179        | 2177.0444      | 1089.0258        | 19 |
| 17 | 2042.8769 | 1021.9421       | 2025.8503      | 1013.4288        | 2024.8663      | 1012.9368        | P    | 2098.0022 | 1049.5047       | 2080.9757      | 1040.9915        | 2079.9917      | 1040.4995        | 18 |
| 18 | 2139.9296 | 1070.4685       | 2122.9031      | 1061.9552        | 2121.9191      | 1061.4632        | P    | 2000.9495 | 1000.9784       | 1983.9229      | 992.4651         | 1982.9389      | 991.9731         | 17 |
| 19 | 2236.9824 | 1118.9948       | 2219.9559      | 1110.4816        | 2218.9718      | 1109.9896        | P    | 1903.8967 | 952.4520        | 1886.8701      | 943.9387         | 1885.8861      | 943.4467         | 16 |
| 20 | 2365.0410 | 1183.0241       | 2348.0144      | 1174.5109        | 2347.0304      | 1174.0188        | Q    | 1806.8439 | 903.9256        | 1789.8174      | 895.4123         | 1788.8334      | 894.9203         | 15 |
| 21 | 2478.1251 | 1239.5662       | 2461.0985      | 1231.0529        | 2460.1145      | 1230.5609        | I    | 1678.7853 | 839.8963        | 1661.7588      | 831.3830         | 1660.7748      | 830.8910         | 14 |
| 22 | 2575.1778 | 1288.0925       | 2558.1513      | 1279.5793        | 2557.1673      | 1279.0873        | P    | 1565.7013 | 783.3543        | 1548.6747      | 774.8410         | 1547.6907      | 774.3490         | 13 |



|    |           |           |           |           |           |           |   |           |          |           |          |           |          |    |
|----|-----------|-----------|-----------|-----------|-----------|-----------|---|-----------|----------|-----------|----------|-----------|----------|----|
| 23 | 2689.2207 | 1345.1140 | 2672.1942 | 1336.6007 | 2671.2102 | 1336.1087 | N | 1468.6485 | 734.8279 | 1451.6220 | 726.3146 | 1450.6380 | 725.8226 | 12 |
| 24 | 2776.2528 | 1388.6300 | 2759.2262 | 1380.1167 | 2758.2422 | 1379.6247 | S | 1354.6056 | 677.8064 | 1337.5790 | 669.2932 | 1336.5950 | 668.8012 | 11 |
| 25 | 2913.3117 | 1457.1595 | 2896.2851 | 1448.6462 | 2895.3011 | 1448.1542 | H | 1267.5736 | 634.2904 | 1250.5470 | 625.7771 | 1249.5630 | 625.2851 | 10 |
| 26 | 3028.3386 | 1514.6730 | 3011.3121 | 1506.1597 | 3010.3281 | 1505.6677 | N | 1130.5147 | 565.7610 | 1113.4881 | 557.2477 | 1112.5041 | 556.7557 | 9  |
| 27 | 3175.3740 | 1588.1907 | 3158.3475 | 1579.6774 | 3157.3635 | 1579.1854 | M | 1015.4877 | 508.2475 | 998.4612  | 499.7342 | 997.4771  | 499.2422 | 8  |
| 28 | 3276.4217 | 1638.7145 | 3259.3952 | 1630.2012 | 3258.4111 | 1629.7092 | T | 868.4523  | 434.7298 | 851.4258  | 426.2165 | 850.4417  | 425.7245 | 7  |
| 29 | 3377.4694 | 1689.2383 | 3360.4428 | 1680.7251 | 3359.4588 | 1680.2330 | T | 767.4046  | 384.2060 | 750.3781  | 375.6927 | 749.3941  | 375.2007 | 6  |
| 30 | 3478.5171 | 1739.7622 | 3461.4905 | 1731.2489 | 3460.5065 | 1730.7569 | T | 666.3570  | 333.6821 | 649.3304  | 325.1688 | 648.3464  | 324.6768 | 5  |
| 31 | 3591.6011 | 1796.3042 | 3574.5746 | 1787.7909 | 3573.5906 | 1787.2989 | L | 565.3093  | 283.1583 | 548.2827  | 274.6450 |           |          | 4  |
| 32 | 3705.6441 | 1853.3257 | 3688.6175 | 1844.8124 | 3687.6335 | 1844.3204 | N | 452.2252  | 226.6162 | 435.1987  | 218.1030 |           |          | 3  |
| 33 | 3868.7074 | 1934.8573 | 3851.6808 | 1926.3441 | 3850.6968 | 1925.8520 | Y | 338.1823  | 169.5948 | 321.1557  | 161.0815 |           |          | 2  |
| 34 |           |           |           |           |           |           | R | 175.1190  | 88.0631  | 158.0924  | 79.5498  |           |          | 1  |

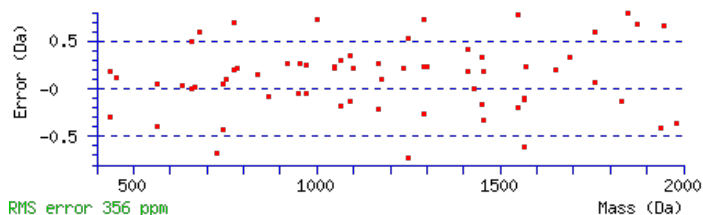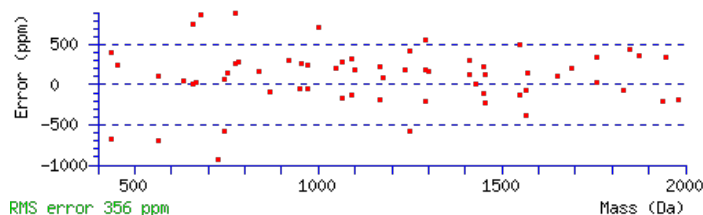

NCBI BLAST search of [WDPEVNC SMAQIQLCPPPQIPNSHNMTTTLNYR](#)

(Parameters: blastp, nr protein database, expect=20000, no filter, PAM30)

Other BLAST [web gateways](#)

All matches to this query

| Score | Mr(calc)  | Delta  | Sequence                                             | Site Analysis         |
|-------|-----------|--------|------------------------------------------------------|-----------------------|
| 85.9  | 4041.8118 | 2.0254 | <a href="#">WDPEVNC SMAQIQLCPPPQIPNSHNMTTTLNYR</a>   | Deamidated N26 34.05% |
| 85.9  | 4041.8118 | 2.0254 | <a href="#">WDPEVNC SMAQIQLCPPPQIPNSHNMTTTLNYR</a>   | Deamidated Q11 34.05% |
| 84.5  | 4041.8118 | 2.0254 | <a href="#">WDPEVNC SMAQIQLCPPPQIPNSHNMTTTLNYR</a>   | Deamidated N6 24.44%  |
| 76.3  | 4041.8118 | 2.0254 | <a href="#">WDPEVNC SMAQIQLCPPPQIPNSHNMTTTLNYR</a>   | Deamidated N23 3.71%  |
| 73.4  | 4041.8118 | 2.0254 | <a href="#">WDPEVNC SMAQIQLCPPPQIPNSHNMTTTLNYR</a>   | Deamidated Q20 1.91%  |
| 73.2  | 4041.8118 | 2.0254 | <a href="#">WDPEVNC SMAQIQLCPPPQIPNSHNMTTTLNYR</a>   | Deamidated Q13 1.83%  |
| 47.0  | 4041.8118 | 2.0254 | <a href="#">WDPEVNC SMAQIQLCPPPQIPNSHNMTTTLNYR</a>   | Deamidated N32 0.00%  |
| 10.3  | 4042.8380 | 0.9992 | <a href="#">LVLQWAAMYGDLLQEDDVSMALFEFVYVSVSDDAR</a>  |                       |
| 9.6   | 4043.8250 | 0.0122 | <a href="#">TMEQKLSSVLSHLASHNSSSNGVFESNDSSTARSSR</a> |                       |
| 9.1   | 4041.8443 | 1.9928 | <a href="#">MIPGVVDTGLFINMAERVYFGMQDGSVNMREKPEC</a>  |                       |

Mascot: <http://www.matrixscience.com/>

# MATRIX SCIENCE Mascot Search Results

## Peptide View

MS/MS Fragmentation of **WDPEVNC SMAQIQLCPPPPQIPNSHNM TTTLNYR**

Found in **P08603** in **con\_Xuniprot\_HUMAN3**, CFAH\_HUMAN Complement factor H OS=Homo sapiens GN=CFH PE=1 SV=4

Match to Query 28357: 4042.802472 from(1348.608100,3+) intensity(7677.0967) rtinseconds(1565) scans(4036) index(6450)

Title: 111019\_Est\_ISCardio\_NMI\_YP\_G\_9Spectrum3547\_scans\_\_4036

Data file C:\mascot\20140703\_Tmgf\_1D\CSV\_UseAnalysis\MasterCSV\All\_Glyco\mgf\ptm\UC18ERLIC\_PTM\_35D.mgf

Click mouse within plot area to zoom in by factor of two about that point

Or, to Da

Label all possible matches Label matches used for scoring

Show Y-axis

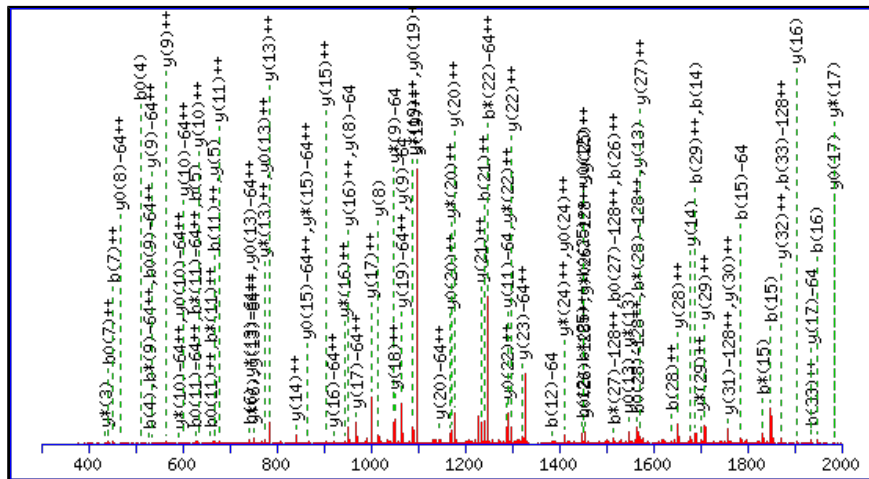

Monoisotopic mass of neutral peptide Mr(calc): 4042.7958

Fixed modifications: Carbamidomethyl (C) (apply to specified residues or termini only)

Variable modifications:

N6 : Deamidated (NQ)

M9 : Oxidation (M), with neutral losses 0.0000(shown in table), 63.9983

M27 : Oxidation (M), with neutral losses 0.0000(shown in table), 63.9983

N32 : Deamidated (NQ)

Ions Score: 85 Expect: 3.1e-007

Matches : 99/682 fragment ions using 136 most intense peaks ([help](#))

| #  | b         | b <sup>++</sup> | b <sup>*</sup> | b <sup>*++</sup> | b <sup>0</sup> | b <sup>0++</sup> | Seq. | y         | y <sup>++</sup> | y <sup>*</sup> | y <sup>*++</sup> | y <sup>0</sup> | y <sup>0++</sup> | #  |
|----|-----------|-----------------|----------------|------------------|----------------|------------------|------|-----------|-----------------|----------------|------------------|----------------|------------------|----|
| 1  | 187.0866  | 94.0469         |                |                  |                |                  | W    |           |                 |                |                  |                |                  | 34 |
| 2  | 302.1135  | 151.5604        |                |                  | 284.1030       | 142.5551         | D    | 3857.7238 | 1929.3655       | 3840.6972      | 1920.8522        | 3839.7132      | 1920.3602        | 33 |
| 3  | 399.1663  | 200.0868        |                |                  | 381.1557       | 191.0815         | P    | 3742.6968 | 1871.8520       | 3725.6703      | 1863.3388        | 3724.6863      | 1862.8468        | 32 |
| 4  | 528.2089  | 264.6081        |                |                  | 510.1983       | 255.6028         | E    | 3645.6441 | 1823.3257       | 3628.6175      | 1814.8124        | 3627.6335      | 1814.3204        | 31 |
| 5  | 627.2773  | 314.1423        |                |                  | 609.2667       | 305.1370         | V    | 3516.6015 | 1758.8044       | 3499.5749      | 1750.2911        | 3498.5909      | 1749.7991        | 30 |
| 6  | 742.3042  | 371.6558        | 725.2777       | 363.1425         | 724.2937       | 362.6505         | N    | 3417.5330 | 1709.2702       | 3400.5065      | 1700.7569        | 3399.5225      | 1700.2649        | 29 |
| 7  | 902.3349  | 451.6711        | 885.3083       | 443.1578         | 884.3243       | 442.6658         | C    | 3302.5061 | 1651.7567       | 3285.4796      | 1643.2434        | 3284.4955      | 1642.7514        | 28 |
| 8  | 989.3669  | 495.1871        | 972.3404       | 486.6738         | 971.3564       | 486.1818         | S    | 3142.4755 | 1571.7414       | 3125.4489      | 1563.2281        | 3124.4649      | 1562.7361        | 27 |
| 9  | 1136.4023 | 568.7048        | 1119.3758      | 560.1915         | 1118.3918      | 559.6995         | M    | 3055.4434 | 1528.2254       | 3038.4169      | 1519.7121        | 3037.4329      | 1519.2201        | 26 |
| 10 | 1207.4394 | 604.2234        | 1190.4129      | 595.7101         | 1189.4289      | 595.2181         | A    | 2908.4080 | 1454.7077       | 2891.3815      | 1446.1944        | 2890.3975      | 1445.7024        | 25 |
| 11 | 1335.4980 | 668.2526        | 1318.4715      | 659.7394         | 1317.4874      | 659.2474         | Q    | 2837.3709 | 1419.1891       | 2820.3444      | 1410.6758        | 2819.3603      | 1410.1838        | 24 |
| 12 | 1448.5821 | 724.7947        | 1431.5555      | 716.2814         | 1430.5715      | 715.7894         | I    | 2709.3123 | 1355.1598       | 2692.2858      | 1346.6465        | 2691.3018      | 1346.1545        | 23 |
| 13 | 1576.6407 | 788.8240        | 1559.6141      | 780.3107         | 1558.6301      | 779.8187         | Q    | 2596.2283 | 1298.6178       | 2579.2017      | 1290.1045        | 2578.2177      | 1289.6125        | 22 |
| 14 | 1689.7247 | 845.3660        | 1672.6982      | 836.8527         | 1671.7142      | 836.3607         | L    | 2468.1697 | 1234.5885       | 2451.1431      | 1226.0752        | 2450.1591      | 1225.5832        | 21 |
| 15 | 1849.7554 | 925.3813        | 1832.7288      | 916.8680         | 1831.7448      | 916.3760         | C    | 2355.0856 | 1178.0465       | 2338.0591      | 1169.5332        | 2337.0751      | 1169.0412        | 20 |
| 16 | 1946.8081 | 973.9077        | 1929.7816      | 965.3944         | 1928.7976      | 964.9024         | P    | 2195.0550 | 1098.0311       | 2178.0284      | 1089.5179        | 2177.0444      | 1089.0258        | 19 |
| 17 | 2043.8609 | 1022.4341       | 2026.8343      | 1013.9208        | 2025.8503      | 1013.4288        | P    | 2098.0022 | 1049.5047       | 2080.9757      | 1040.9915        | 2079.9917      | 1040.4995        | 18 |
| 18 | 2140.9137 | 1070.9605       | 2123.8871      | 1062.4472        | 2122.9031      | 1061.9552        | P    | 2000.9495 | 1000.9784       | 1983.9229      | 992.4651         | 1982.9389      | 991.9731         | 17 |
| 19 | 2237.9664 | 1119.4869       | 2220.9399      | 1110.9736        | 2219.9559      | 1110.4816        | P    | 1903.8967 | 952.4520        | 1886.8701      | 943.9387         | 1885.8861      | 943.4467         | 16 |
| 20 | 2366.0250 | 1183.5161       | 2348.9985      | 1175.0029        | 2348.0144      | 1174.5109        | Q    | 1806.8439 | 903.9256        | 1789.8174      | 895.4123         | 1788.8334      | 894.9203         | 15 |
| 21 | 2479.1091 | 1240.0582       | 2462.0825      | 1231.5449        | 2461.0985      | 1231.0529        | I    | 1678.7853 | 839.8963        | 1661.7588      | 831.3830         | 1660.7748      | 830.8910         | 14 |

|    |           |           |           |           |           |           |   |           |          |           |          |           |          |    |
|----|-----------|-----------|-----------|-----------|-----------|-----------|---|-----------|----------|-----------|----------|-----------|----------|----|
| 22 | 2576.1618 | 1288.5846 | 2559.1353 | 1280.0713 | 2558.1513 | 1279.5793 | P | 1565.7013 | 783.3543 | 1548.6747 | 774.8410 | 1547.6907 | 774.3490 | 13 |
| 23 | 2690.2048 | 1345.6060 | 2673.1782 | 1337.0927 | 2672.1942 | 1336.6007 | N | 1468.6485 | 734.8279 | 1451.6220 | 726.3146 | 1450.6380 | 725.8226 | 12 |
| 24 | 2777.2368 | 1389.1220 | 2760.2102 | 1380.6088 | 2759.2262 | 1380.1167 | S | 1354.6056 | 677.8064 | 1337.5790 | 669.2932 | 1336.5950 | 668.8012 | 11 |
| 25 | 2914.2957 | 1457.6515 | 2897.2691 | 1449.1382 | 2896.2851 | 1448.6462 | H | 1267.5736 | 634.2904 | 1250.5470 | 625.7771 | 1249.5630 | 625.2851 | 10 |
| 26 | 3028.3386 | 1514.6730 | 3011.3121 | 1506.1597 | 3010.3281 | 1505.6677 | N | 1130.5147 | 565.7610 | 1113.4881 | 557.2477 | 1112.5041 | 556.7557 | 9  |
| 27 | 3175.3740 | 1588.1907 | 3158.3475 | 1579.6774 | 3157.3635 | 1579.1854 | M | 1016.4717 | 508.7395 | 999.4452  | 500.2262 | 998.4612  | 499.7342 | 8  |
| 28 | 3276.4217 | 1638.7145 | 3259.3952 | 1630.2012 | 3258.4111 | 1629.7092 | T | 869.4363  | 435.2218 | 852.4098  | 426.7085 | 851.4258  | 426.2165 | 7  |
| 29 | 3377.4694 | 1689.2383 | 3360.4428 | 1680.7251 | 3359.4588 | 1680.2330 | T | 768.3886  | 384.6980 | 751.3621  | 376.1847 | 750.3781  | 375.6927 | 6  |
| 30 | 3478.5171 | 1739.7622 | 3461.4905 | 1731.2489 | 3460.5065 | 1730.7569 | T | 667.3410  | 334.1741 | 650.3144  | 325.6608 | 649.3304  | 325.1688 | 5  |
| 31 | 3591.6011 | 1796.3042 | 3574.5746 | 1787.7909 | 3573.5906 | 1787.2989 | L | 566.2933  | 283.6503 | 549.2667  | 275.1370 |           |          | 4  |
| 32 | 3706.6281 | 1853.8177 | 3689.6015 | 1845.3044 | 3688.6175 | 1844.8124 | N | 453.2092  | 227.1082 | 436.1827  | 218.5950 |           |          | 3  |
| 33 | 3869.6914 | 1935.3493 | 3852.6648 | 1926.8361 | 3851.6808 | 1926.3441 | Y | 338.1823  | 169.5948 | 321.1557  | 161.0815 |           |          | 2  |
| 34 |           |           |           |           |           |           | R | 175.1190  | 88.0631  | 158.0924  | 79.5498  |           |          | 1  |

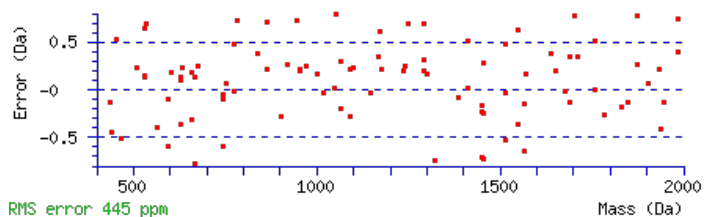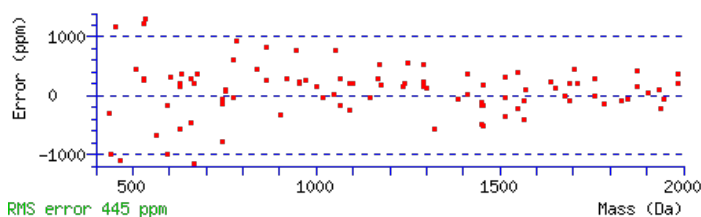

NCBI BLAST search of [WDPEVNC SMAQIQLCPPPQIPNSHNMTTTLNYR](#)

(Parameters: blastp, nr protein database, expect=20000, no filter, PAM30)

Other BLAST [web gateways](#)

All matches to this query

| Score | Mr(calc)  | Delta  | Sequence                                           | Site Analysis              |
|-------|-----------|--------|----------------------------------------------------|----------------------------|
| 85.3  | 4042.7958 | 0.0067 | <a href="#">WDPEVNC SMAQIQLCPPPQIPNSHNMTTTLNYR</a> | Deamidated N6, N32 29.71%  |
| 85.3  | 4042.7958 | 0.0067 | <a href="#">WDPEVNC SMAQIQLCPPPQIPNSHNMTTTLNYR</a> | Deamidated Q20, N23 29.37% |
| 84.6  | 4042.7958 | 0.0067 | <a href="#">WDPEVNC SMAQIQLCPPPQIPNSHNMTTTLNYR</a> | Deamidated N23, N26 25.52% |
| 78.6  | 4042.7958 | 0.0067 | <a href="#">WDPEVNC SMAQIQLCPPPQIPNSHNMTTTLNYR</a> | Deamidated Q11, Q13 6.40%  |
| 77.9  | 4042.7958 | 0.0067 | <a href="#">WDPEVNC SMAQIQLCPPPQIPNSHNMTTTLNYR</a> | Deamidated Q13, Q20 5.44%  |
| 73.4  | 4042.7958 | 0.0067 | <a href="#">WDPEVNC SMAQIQLCPPPQIPNSHNMTTTLNYR</a> | Deamidated N6, Q11 1.92%   |
| 69.2  | 4042.7958 | 0.0067 | <a href="#">WDPEVNC SMAQIQLCPPPQIPNSHNMTTTLNYR</a> | Deamidated N26, N32 0.73%  |
| 63.7  | 4041.8118 | 0.9907 | <a href="#">WDPEVNC SMAQIQLCPPPQIPNSHNMTTTLNYR</a> |                            |
| 61.4  | 4041.8118 | 0.9907 | <a href="#">WDPEVNC SMAQIQLCPPPQIPNSHNMTTTLNYR</a> |                            |
| 59.6  | 4041.8118 | 0.9907 | <a href="#">WDPEVNC SMAQIQLCPPPQIPNSHNMTTTLNYR</a> |                            |

Mascot: <http://www.matrixscience.com/>

# MATRIX SCIENCE Mascot Search Results

## Peptide View

MS/MS Fragmentation of **WDPEVNC SMAQIQLCPPPPQIPNSHNM TTTLN YR**

Found in **P08603** in **con\_Xuniprot\_HUMAN3**, CFAH\_HUMAN Complement factor H OS=Homo sapiens GN=CFH PE=1 SV=4

Match to Query 28343: 4026.823722 from(1343.281850,3+) intensity(19949.1875) rtinseconds(1790) scans(4648) index(6527)

Title: 111019\_Est\_ISCardio\_NMI\_YP\_G\_9Spectrum4086\_scans\_\_4648

Data file C:\mascot\20140703\_Tmgf\_1D\CSV\_UseAnalysis\MasterCSV\All\_Glyco\mgf\ptm\UC18ERLIC\_PTM\_35D.mgf

Click mouse within plot area to zoom in by factor of two about that point

Or, to Da

Label all possible matches Label matches used for scoring

Show Y-axis

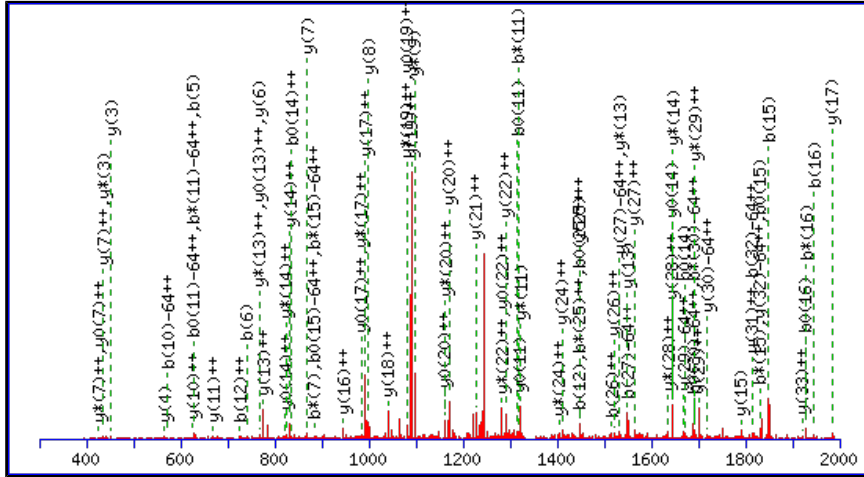

Monoisotopic mass of neutral peptide Mr(calc): 4025.8168

Fixed modifications: Carbamidomethyl (C) (apply to specified residues or termini only)

Variable modifications:

M9 : Oxidation (M), with neutral losses 0.0000 (shown in table), 63.9983

N26 : Deamidated (NQ)

Ions Score: 82 Expect: 8.1e-007

Matches : 83/574 fragment ions using 144 most intense peaks ([help](#))

| #  | b         | b <sup>++</sup> | b <sup>*</sup> | b <sup>*++</sup> | b <sup>0</sup> | b <sup>0++</sup> | Seq. | y         | y <sup>++</sup> | y <sup>*</sup> | y <sup>*++</sup> | y <sup>0</sup> | y <sup>0++</sup> | #  |
|----|-----------|-----------------|----------------|------------------|----------------|------------------|------|-----------|-----------------|----------------|------------------|----------------|------------------|----|
| 1  | 187.0866  | 94.0469         |                |                  |                |                  | W    |           |                 |                |                  |                |                  | 34 |
| 2  | 302.1135  | 151.5604        |                |                  | 284.1030       | 142.5551         | D    | 3840.7448 | 1920.8761       | 3823.7183      | 1912.3628        | 3822.7343      | 1911.8708        | 33 |
| 3  | 399.1663  | 200.0868        |                |                  | 381.1557       | 191.0815         | P    | 3725.7179 | 1863.3626       | 3708.6913      | 1854.8493        | 3707.7073      | 1854.3573        | 32 |
| 4  | 528.2089  | 264.6081        |                |                  | 510.1983       | 255.6028         | E    | 3628.6651 | 1814.8362       | 3611.6386      | 1806.3229        | 3610.6546      | 1805.8309        | 31 |
| 5  | 627.2773  | 314.1423        |                |                  | 609.2667       | 305.1370         | V    | 3499.6225 | 1750.3149       | 3482.5960      | 1741.8016        | 3481.6120      | 1741.3096        | 30 |
| 6  | 741.3202  | 371.1638        | 724.2937       | 362.6505         | 723.3097       | 362.1585         | N    | 3400.5541 | 1700.7807       | 3383.5276      | 1692.2674        | 3382.5436      | 1691.7754        | 29 |
| 7  | 901.3509  | 451.1791        | 884.3243       | 442.6658         | 883.3403       | 442.1738         | C    | 3286.5112 | 1643.7592       | 3269.4846      | 1635.2460        | 3268.5006      | 1634.7540        | 28 |
| 8  | 988.3829  | 494.6951        | 971.3564       | 486.1818         | 970.3723       | 485.6898         | S    | 3126.4805 | 1563.7439       | 3109.4540      | 1555.2306        | 3108.4700      | 1554.7386        | 27 |
| 9  | 1135.4183 | 568.2128        | 1118.3918      | 559.6995         | 1117.4077      | 559.2075         | M    | 3039.4485 | 1520.2279       | 3022.4220      | 1511.7146        | 3021.4379      | 1511.2226        | 26 |
| 10 | 1206.4554 | 603.7313        | 1189.4289      | 595.2181         | 1188.4449      | 594.7261         | A    | 2892.4131 | 1446.7102       | 2875.3866      | 1438.1969        | 2874.4025      | 1437.7049        | 25 |
| 11 | 1334.5140 | 667.7606        | 1317.4875      | 659.2474         | 1316.5034      | 658.7554         | Q    | 2821.3760 | 1411.1916       | 2804.3494      | 1402.6784        | 2803.3654      | 1402.1864        | 24 |
| 12 | 1447.5981 | 724.3027        | 1430.5715      | 715.7894         | 1429.5875      | 715.2974         | I    | 2693.3174 | 1347.1623       | 2676.2909      | 1338.6491        | 2675.3069      | 1338.1571        | 23 |
| 13 | 1575.6566 | 788.3320        | 1558.6301      | 779.8187         | 1557.6461      | 779.3267         | Q    | 2580.2334 | 1290.6203       | 2563.2068      | 1282.1070        | 2562.2228      | 1281.6150        | 22 |
| 14 | 1688.7407 | 844.8740        | 1671.7142      | 836.3607         | 1670.7301      | 835.8687         | L    | 2452.1748 | 1226.5910       | 2435.1482      | 1218.0778        | 2434.1642      | 1217.5857        | 21 |
| 15 | 1848.7714 | 924.8893        | 1831.7448      | 916.3760         | 1830.7608      | 915.8840         | C    | 2339.0907 | 1170.0490       | 2322.0642      | 1161.5357        | 2321.0801      | 1161.0437        | 20 |
| 16 | 1945.8241 | 973.4157        | 1928.7976      | 964.9024         | 1927.8136      | 964.4104         | P    | 2179.0601 | 1090.0337       | 2162.0335      | 1081.5204        | 2161.0495      | 1081.0284        | 19 |
| 17 | 2042.8769 | 1021.9421       | 2025.8503      | 1013.4288        | 2024.8663      | 1012.9368        | P    | 2082.0073 | 1041.5073       | 2064.9808      | 1032.9940        | 2063.9967      | 1032.5020        | 18 |
| 18 | 2139.9296 | 1070.4685       | 2122.9031      | 1061.9552        | 2121.9191      | 1061.4632        | P    | 1984.9545 | 992.9809        | 1967.9280      | 984.4676         | 1966.9440      | 983.9756         | 17 |
| 19 | 2236.9824 | 1118.9948       | 2219.9559      | 1110.4816        | 2218.9718      | 1109.9896        | P    | 1887.9018 | 944.4545        | 1870.8752      | 935.9413         | 1869.8912      | 935.4492         | 16 |
| 20 | 2365.0410 | 1183.0241       | 2348.0144      | 1174.5109        | 2347.0304      | 1174.0188        | Q    | 1790.8490 | 895.9281        | 1773.8225      | 887.4149         | 1772.8384      | 886.9229         | 15 |
| 21 | 2478.1251 | 1239.5662       | 2461.0985      | 1231.0529        | 2460.1145      | 1230.5609        | I    | 1662.7904 | 831.8989        | 1645.7639      | 823.3856         | 1644.7799      | 822.8936         | 14 |
| 22 | 2575.1778 | 1288.0925       | 2558.1513      | 1279.5793        | 2557.1673      | 1279.0873        | P    | 1549.7064 | 775.3568        | 1532.6798      | 766.8435         | 1531.6958      | 766.3515         | 13 |

|    |           |           |           |           |           |           |   |           |          |           |          |           |          |    |
|----|-----------|-----------|-----------|-----------|-----------|-----------|---|-----------|----------|-----------|----------|-----------|----------|----|
| 23 | 2689.2207 | 1345.1140 | 2672.1942 | 1336.6007 | 2671.2102 | 1336.1087 | N | 1452.6536 | 726.8304 | 1435.6271 | 718.3172 | 1434.6430 | 717.8252 | 12 |
| 24 | 2776.2528 | 1388.6300 | 2759.2262 | 1380.1167 | 2758.2422 | 1379.6247 | S | 1338.6107 | 669.8090 | 1321.5841 | 661.2957 | 1320.6001 | 660.8037 | 11 |
| 25 | 2913.3117 | 1457.1595 | 2896.2851 | 1448.6462 | 2895.3011 | 1448.1542 | H | 1251.5786 | 626.2930 | 1234.5521 | 617.7797 | 1233.5681 | 617.2877 | 10 |
| 26 | 3028.3386 | 1514.6730 | 3011.3121 | 1506.1597 | 3010.3281 | 1505.6677 | N | 1114.5197 | 557.7635 | 1097.4932 | 549.2502 | 1096.5092 | 548.7582 | 9  |
| 27 | 3159.3791 | 1580.1932 | 3142.3526 | 1571.6799 | 3141.3685 | 1571.1879 | M | 999.4928  | 500.2500 | 982.4662  | 491.7368 | 981.4822  | 491.2448 | 8  |
| 28 | 3260.4268 | 1630.7170 | 3243.4002 | 1622.2038 | 3242.4162 | 1621.7118 | T | 868.4523  | 434.7298 | 851.4258  | 426.2165 | 850.4417  | 425.7245 | 7  |
| 29 | 3361.4745 | 1681.2409 | 3344.4479 | 1672.7276 | 3343.4639 | 1672.2356 | T | 767.4046  | 384.2060 | 750.3781  | 375.6927 | 749.3941  | 375.2007 | 6  |
| 30 | 3462.5221 | 1731.7647 | 3445.4956 | 1723.2514 | 3444.5116 | 1722.7594 | T | 666.3570  | 333.6821 | 649.3304  | 325.1688 | 648.3464  | 324.6768 | 5  |
| 31 | 3575.6062 | 1788.3067 | 3558.5797 | 1779.7935 | 3557.5956 | 1779.3015 | L | 565.3093  | 283.1583 | 548.2827  | 274.6450 |           |          | 4  |
| 32 | 3689.6491 | 1845.3282 | 3672.6226 | 1836.8149 | 3671.6386 | 1836.3229 | N | 452.2252  | 226.6162 | 435.1987  | 218.1030 |           |          | 3  |
| 33 | 3852.7125 | 1926.8599 | 3835.6859 | 1918.3466 | 3834.7019 | 1917.8546 | Y | 338.1823  | 169.5948 | 321.1557  | 161.0815 |           |          | 2  |
| 34 |           |           |           |           |           |           | R | 175.1190  | 88.0631  | 158.0924  | 79.5498  |           |          | 1  |

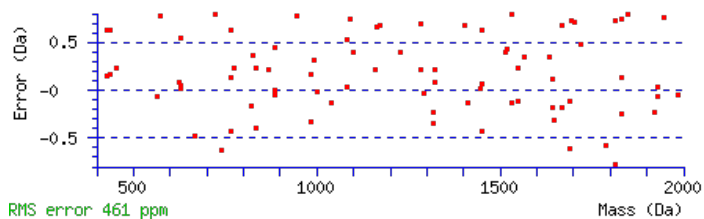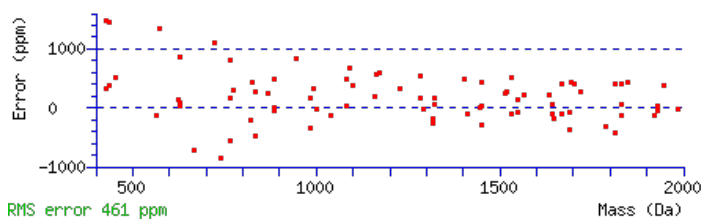

NCBI BLAST search of [WDPEVNC SMAQIQLCPPPQIPNSHNMTTTLNYR](#)

(Parameters: blastp, nr protein database, expect=20000, no filter, PAM30)

Other BLAST [web gateways](#)

All matches to this query

| Score | Mr(calc)  | Delta  | Sequence                                           | Site Analysis                        |
|-------|-----------|--------|----------------------------------------------------|--------------------------------------|
| 82.2  | 4025.8168 | 1.0069 | <a href="#">WDPEVNC SMAQIQLCPPPQIPNSHNMTTTLNYR</a> | Deamidated N26, Oxidation M9; 29.74% |
| 82.1  | 4025.8168 | 1.0069 | <a href="#">WDPEVNC SMAQIQLCPPPQIPNSHNMTTTLNYR</a> | Deamidated N32, Oxidation M9; 29.26% |
| 81.0  | 4025.8168 | 1.0069 | <a href="#">WDPEVNC SMAQIQLCPPPQIPNSHNMTTTLNYR</a> | Deamidated N23, Oxidation M9; 22.82% |
| 80.0  | 4025.8168 | 1.0069 | <a href="#">WDPEVNC SMAQIQLCPPPQIPNSHNMTTTLNYR</a> | Deamidated Q20, Oxidation M9; 17.88% |
| 60.1  | 4025.8168 | 1.0069 | <a href="#">WDPEVNC SMAQIQLCPPPQIPNSHNMTTTLNYR</a> | Deamidated Q13, Oxidation M9; 0.18%  |
| 58.2  | 4025.8168 | 1.0069 | <a href="#">WDPEVNC SMAQIQLCPPPQIPNSHNMTTTLNYR</a> | Deamidated Q11, Oxidation M9; 0.12%  |
| 42.4  | 4025.8168 | 1.0069 | <a href="#">WDPEVNC SMAQIQLCPPPQIPNSHNMTTTLNYR</a> | Deamidated N6, Oxidation M9; 0.00%   |
| 33.3  | 4024.8328 | 1.9909 | <a href="#">WDPEVNC SMAQIQLCPPPQIPNSHNMTTTLNYR</a> |                                      |
| 25.8  | 4025.8168 | 1.0069 | <a href="#">WDPEVNC SMAQIQLCPPPQIPNSHNMTTTLNYR</a> | Deamidated N26, Oxidation M27; 0.00% |
| 23.5  | 4025.8168 | 1.0069 | <a href="#">WDPEVNC SMAQIQLCPPPQIPNSHNMTTTLNYR</a> | Deamidated Q20, Oxidation M27; 0.00% |

Mascot: <http://www.matrixscience.com/>



# MATRIX SCIENCE Mascot Search Results

## Peptide View

MS/MS Fragmentation of **ISEENETTCYMGKWSSPPQCEGLPCK**

Found in **P08603** in **con\_Xuniprot\_HUMAN3**, CFAH\_HUMAN Complement factor H OS=Homo sapiens GN=CFH PE=1 SV=4

Match to Query 27317: 3104.296152 from(1035.772660,3+) intensity(30452.9336) rtinseconds(992) scans(2327) index(2557)

Title: 111019\_Est\_ISCardio\_NMI\_YP\_G\_5Spectrum1970\_scans\_\_2327

Data file C:\mascot\20140703\_Tmgf\_1D\CSV\_UseAnalysis\MasterCSV\All\_Glyco\mgf\ptm\UC18ERLIC\_PTM\_35D.mgf

Click mouse within plot area to zoom in by factor of two about that point

Or, to Da

Label all possible matches Label matches used for scoring

Show Y-axis

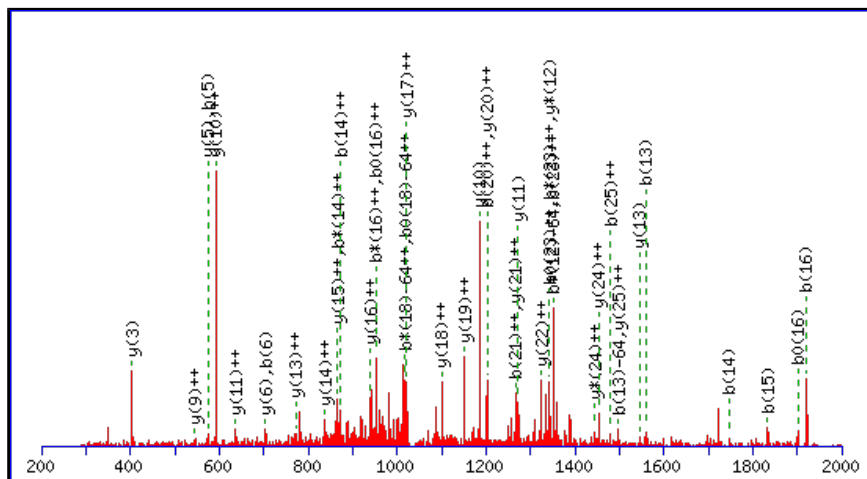

Monoisotopic mass of neutral peptide Mr(calc): 3104.2871

Fixed modifications: Carbamidomethyl (C) (apply to specified residues or termini only)

Variable modifications:

N5 : Deamidated (NQ)

M11 : Oxidation (M), with neutral losses 0.0000(shown in table), 63.9983

Ions Score: 77 Expect: 8.3e-007

Matches : 44/430 fragment ions using 70 most intense peaks ([help](#))

| #  | b         | b <sup>++</sup> | b <sup>*</sup> | b <sup>*++</sup> | b <sup>0</sup> | b <sup>0++</sup> | Seq. | y         | y <sup>++</sup> | y <sup>*</sup> | y <sup>*++</sup> | y <sup>0</sup> | y <sup>0++</sup> | #  |
|----|-----------|-----------------|----------------|------------------|----------------|------------------|------|-----------|-----------------|----------------|------------------|----------------|------------------|----|
| 1  | 114.0913  | 57.5493         |                |                  |                |                  | I    |           |                 |                |                  |                |                  | 26 |
| 2  | 201.1234  | 101.0653        |                |                  | 183.1128       | 92.0600          | S    | 2992.2104 | 1496.6088       | 2975.1838      | 1488.0956        | 2974.1998      | 1487.6035        | 25 |
| 3  | 330.1660  | 165.5866        |                |                  | 312.1554       | 156.5813         | E    | 2905.1783 | 1453.0928       | 2888.1518      | 1444.5795        | 2887.1678      | 1444.0875        | 24 |
| 4  | 459.2086  | 230.1079        |                |                  | 441.1980       | 221.1026         | E    | 2776.1358 | 1388.5715       | 2759.1092      | 1380.0582        | 2758.1252      | 1379.5662        | 23 |
| 5  | 574.2355  | 287.6214        | 557.2089       | 279.1081         | 556.2249       | 278.6161         | N    | 2647.0932 | 1324.0502       | 2630.0666      | 1315.5369        | 2629.0826      | 1315.0449        | 22 |
| 6  | 703.2781  | 352.1427        | 686.2515       | 343.6294         | 685.2675       | 343.1374         | E    | 2532.0662 | 1266.5367       | 2515.0397      | 1258.0235        | 2514.0557      | 1257.5315        | 21 |
| 7  | 804.3258  | 402.6665        | 787.2992       | 394.1532         | 786.3152       | 393.6612         | T    | 2403.0236 | 1202.0155       | 2385.9971      | 1193.5022        | 2385.0131      | 1193.0102        | 20 |
| 8  | 905.3734  | 453.1904        | 888.3469       | 444.6771         | 887.3629       | 444.1851         | T    | 2301.9759 | 1151.4916       | 2284.9494      | 1142.9783        | 2283.9654      | 1142.4863        | 19 |
| 9  | 1065.4041 | 533.2057        | 1048.3775      | 524.6924         | 1047.3935      | 524.2004         | C    | 2200.9283 | 1100.9678       | 2183.9017      | 1092.4545        | 2182.9177      | 1091.9625        | 18 |
| 10 | 1228.4674 | 614.7374        | 1211.4409      | 606.2241         | 1210.4569      | 605.7321         | Y    | 2040.8976 | 1020.9524       | 2023.8711      | 1012.4392        | 2022.8871      | 1011.9472        | 17 |
| 11 | 1375.5028 | 688.2551        | 1358.4763      | 679.7418         | 1357.4923      | 679.2498         | M    | 1877.8343 | 939.4208        | 1860.8077      | 930.9075         | 1859.8237      | 930.4155         | 16 |
| 12 | 1432.5243 | 716.7658        | 1415.4977      | 708.2525         | 1414.5137      | 707.7605         | G    | 1730.7989 | 865.9031        | 1713.7723      | 857.3898         | 1712.7883      | 856.8978         | 15 |
| 13 | 1560.6193 | 780.8133        | 1543.5927      | 772.3000         | 1542.6087      | 771.8080         | K    | 1673.7774 | 837.3924        | 1656.7509      | 828.8791         | 1655.7669      | 828.3871         | 14 |
| 14 | 1746.6986 | 873.8529        | 1729.6720      | 865.3396         | 1728.6880      | 864.8476         | W    | 1545.6825 | 773.3449        | 1528.6559      | 764.8316         | 1527.6719      | 764.3396         | 13 |
| 15 | 1833.7306 | 917.3689        | 1816.7040      | 908.8557         | 1815.7200      | 908.3637         | S    | 1359.6031 | 680.3052        | 1342.5766      | 671.7919         | 1341.5926      | 671.2999         | 12 |
| 16 | 1920.7626 | 960.8849        | 1903.7361      | 952.3717         | 1902.7521      | 951.8797         | S    | 1272.5711 | 636.7892        | 1255.5446      | 628.2759         | 1254.5606      | 627.7839         | 11 |
| 17 | 2017.8154 | 1009.4113       | 2000.7888      | 1000.8981        | 1999.8048      | 1000.4060        | P    | 1185.5391 | 593.2732        | 1168.5125      | 584.7599         | 1167.5285      | 584.2679         | 10 |
| 18 | 2114.8681 | 1057.9377       | 2097.8416      | 1049.4244        | 2096.8576      | 1048.9324        | P    | 1088.4863 | 544.7468        | 1071.4598      | 536.2335         | 1070.4758      | 535.7415         | 9  |
| 19 | 2242.9267 | 1121.9670       | 2225.9002      | 1113.4537        | 2224.9162      | 1112.9617        | Q    | 991.4336  | 496.2204        | 974.4070       | 487.7071         | 973.4230       | 487.2151         | 8  |
| 20 | 2402.9574 | 1201.9823       | 2385.9308      | 1193.4691        | 2384.9468      | 1192.9770        | C    | 863.3750  | 432.1911        | 846.3484       | 423.6779         | 845.3644       | 423.1858         | 7  |
| 21 | 2532.0000 | 1266.5036       | 2514.9734      | 1257.9903        | 2513.9894      | 1257.4983        | E    | 703.3443  | 352.1758        | 686.3178       | 343.6625         | 685.3338       | 343.1705         | 6  |
| 22 | 2589.0214 | 1295.0144       | 2571.9949      | 1286.5011        | 2571.0109      | 1286.0091        | G    | 574.3017  | 287.6545        | 557.2752       | 279.1412         |                |                  | 5  |

|    |           |           |           |           |           |           |   |          |          |          |          |  |  |   |
|----|-----------|-----------|-----------|-----------|-----------|-----------|---|----------|----------|----------|----------|--|--|---|
| 23 | 2702.1055 | 1351.5564 | 2685.0789 | 1343.0431 | 2684.0949 | 1342.5511 | L | 517.2803 | 259.1438 | 500.2537 | 250.6305 |  |  | 4 |
| 24 | 2799.1583 | 1400.0828 | 2782.1317 | 1391.5695 | 2781.1477 | 1391.0775 | P | 404.1962 | 202.6017 | 387.1697 | 194.0885 |  |  | 3 |
| 25 | 2959.1889 | 1480.0981 | 2942.1624 | 1471.5848 | 2941.1783 | 1471.0928 | C | 307.1435 | 154.0754 | 290.1169 | 145.5621 |  |  | 2 |
| 26 |           |           |           |           |           |           | K | 147.1128 | 74.0600  | 130.0863 | 65.5468  |  |  | 1 |

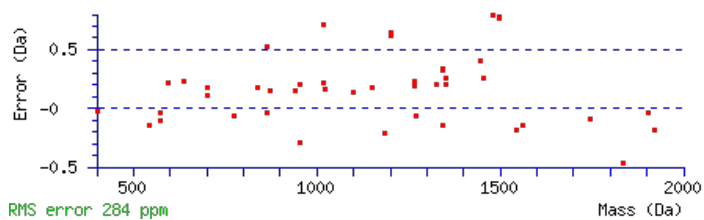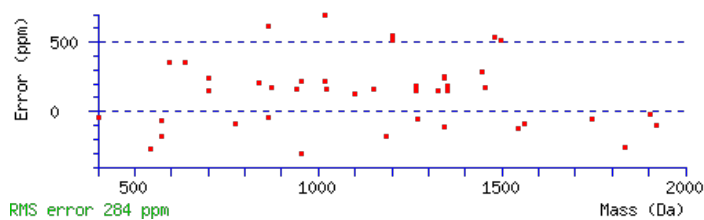

NCBI BLAST search of [ISEENETTCYMGKWSSPPQCEGLPCK](#)  
 (Parameters: blastp, nr protein database, expect=20000, no filter, PAM30)  
 Other BLAST [web gateways](#)

All matches to this query

| Score | Mr(calc)  | Delta   | Sequence                                     | Site Analysis        |
|-------|-----------|---------|----------------------------------------------|----------------------|
| 77.0  | 3104.2871 | 0.0090  | <a href="#">ISEENETTCYMGKWSSPPQCEGLPCK</a>   | Deamidated N5 95.82% |
| 63.4  | 3104.2871 | 0.0090  | <a href="#">ISEENETTCYMGKWSSPPQCEGLPCK</a>   | Deamidated Q19 4.18% |
| 56.2  | 3103.3031 | 0.9930  | <a href="#">ISEENETTCYMGKWSSPPQCEGLPCK</a>   |                      |
| 8.8   | 3104.3103 | -0.0141 | <a href="#">AQCCPSAALIDYTYMTGLQHWSGDWR</a>   |                      |
| 3.5   | 3104.2936 | 0.0025  | <a href="#">NSMHVDMADEAYSIGPAPSQQSYLSMEK</a> |                      |
| 0.3   | 3104.3060 | -0.0099 | <a href="#">QEYTWQQGYSDEVDNIWRDDWDVR</a>     |                      |
| 0.3   | 3104.3060 | -0.0099 | <a href="#">QEYTWQQGYSDEVDNIWRDDWDVR</a>     |                      |
| 0.3   | 3104.3060 | -0.0099 | <a href="#">QEYTWQQGYSDEVDNIWRDDWDVR</a>     |                      |

Mascot: <http://www.matrixscience.com/>



# MASCOT SCIENCE Mascot Search Results

## Peptide View

MS/MS Fragmentation of **AGEQVITYTCATYYKMDGASNVTICNSR**

Found in **P08603** in **con\_Xuniprot\_HUMAN3**, CFAH\_HUMAN Complement factor H OS=Homo sapiens GN=CFH PE=1 SV=4

Match to Query 27299: 3076.324182 from(1026.448670,3+) intensity(14095.3291) rtinseconds(1039) scans(2410) index(25241)

Title: 111019\_Est\_ML\_YS\_G\_07Spectrum2032\_scans\_\_2410

Data file C:\mascot\20140703\_Tmgf\_1D\CSV\_UseAnalysis\MasterCSV\All\_Glyco\mgf\ptm\UC18ERLIC\_PTM\_35D.mgf

Click mouse within plot area to zoom in by factor of two about that point

Or,  to  Da

Label all possible matches  Label matches used for scoring

Show Y-axis

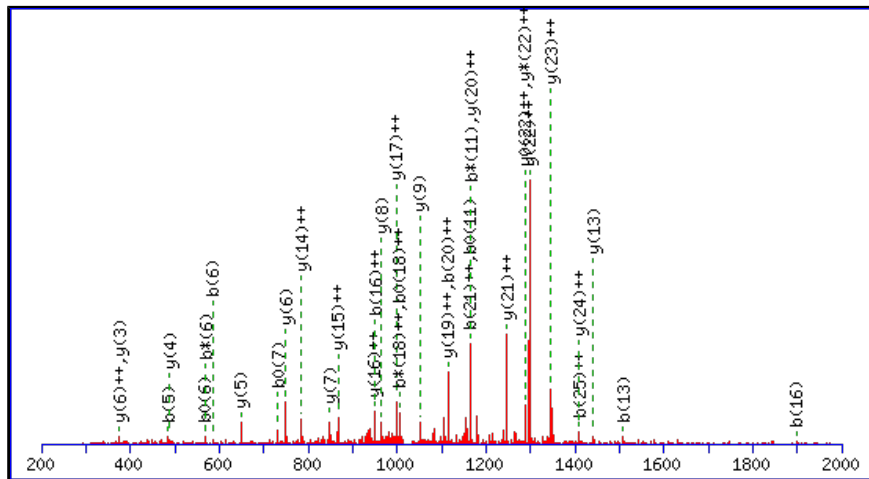

Monoisotopic mass of neutral peptide Mr(calc): 3076.3212

Fixed modifications: Carbamidomethyl (C) (apply to specified residues or termini only)

Variable modifications:

M15 : Oxidation (M), with neutral losses 0.0000(shown in table), 63.9983

N20 : Deamidated (NQ)

Ions Score: 73 Expect: 3.1e-006

Matches : 36/456 fragment ions using 51 most intense peaks ([help](#))

| #  | b                | b <sup>++</sup>  | b <sup>*</sup>   | b <sup>*++</sup> | b <sup>0</sup>   | b <sup>0++</sup> | Seq. | y                | y <sup>++</sup>  | y <sup>*</sup> | y <sup>*++</sup> | y <sup>0</sup> | y <sup>0++</sup> | #  |
|----|------------------|------------------|------------------|------------------|------------------|------------------|------|------------------|------------------|----------------|------------------|----------------|------------------|----|
| 1  | 72.0444          | 36.5258          |                  |                  |                  |                  | A    |                  |                  |                |                  |                |                  | 27 |
| 2  | 129.0659         | 65.0366          |                  |                  |                  |                  | G    | 3006.2914        | 1503.6493        | 2989.2649      | 1495.1361        | 2988.2808      | 1494.6441        | 26 |
| 3  | 258.1084         | 129.5579         |                  |                  | 240.0979         | 120.5526         | E    | 2949.2699        | 1475.1386        | 2932.2434      | 1466.6253        | 2931.2594      | 1466.1333        | 25 |
| 4  | 386.1670         | 193.5872         | 369.1405         | 185.0739         | 368.1565         | 184.5819         | Q    | 2820.2273        | 1410.6173        | 2803.2008      | 1402.1040        | 2802.2168      | 1401.6120        | 24 |
| 5  | <b>485.2354</b>  | 243.1214         | 468.2089         | 234.6081         | 467.2249         | 234.1161         | V    | 2692.1688        | <b>1346.5880</b> | 2675.1422      | 1338.0747        | 2674.1582      | 1337.5827        | 23 |
| 6  | <b>586.2831</b>  | 293.6452         | <b>569.2566</b>  | 285.1319         | <b>568.2726</b>  | 284.6399         | T    | 2593.1004        | <b>1297.0538</b> | 2576.0738      | <b>1288.5405</b> | 2575.0898      | <b>1288.0485</b> | 22 |
| 7  | 749.3464         | 375.1769         | 732.3199         | 366.6636         | <b>731.3359</b>  | 366.1716         | Y    | 2492.0527        | <b>1246.5300</b> | 2475.0261      | 1238.0167        | 2474.0421      | 1237.5247        | 21 |
| 8  | 850.3941         | 425.7007         | 833.3676         | 417.1874         | 832.3836         | 416.6954         | T    | 2328.9893        | <b>1164.9983</b> | 2311.9628      | 1156.4850        | 2310.9788      | 1155.9930        | 20 |
| 9  | 1010.4248        | 505.7160         | 993.3982         | 497.2028         | 992.4142         | 496.7107         | C    | 2227.9417        | <b>1114.4745</b> | 2210.9151      | 1105.9612        | 2209.9311      | 1105.4692        | 19 |
| 10 | 1081.4619        | 541.2346         | 1064.4353        | 532.7213         | 1063.4513        | 532.2293         | A    | 2067.9110        | 1034.4591        | 2050.8845      | 1025.9459        | 2049.9005      | 1025.4539        | 18 |
| 11 | 1182.5096        | 591.7584         | <b>1165.4830</b> | 583.2451         | <b>1164.4990</b> | 582.7531         | T    | 1996.8739        | <b>998.9406</b>  | 1979.8474      | 990.4273         | 1978.8633      | 989.9353         | 17 |
| 12 | 1345.5729        | 673.2901         | 1328.5463        | 664.7768         | 1327.5623        | 664.2848         | Y    | 1895.8262        | <b>948.4168</b>  | 1878.7997      | 939.9035         | 1877.8157      | 939.4115         | 16 |
| 13 | <b>1508.6362</b> | 754.8218         | 1491.6097        | 746.3085         | 1490.6257        | 745.8165         | Y    | 1732.7629        | <b>866.8851</b>  | 1715.7363      | 858.3718         | 1714.7523      | 857.8798         | 15 |
| 14 | 1636.7312        | 818.8692         | 1619.7046        | 810.3560         | 1618.7206        | 809.8640         | K    | 1569.6996        | <b>785.3534</b>  | 1552.6730      | 776.8401         | 1551.6890      | 776.3481         | 14 |
| 15 | 1783.7666        | 892.3869         | 1766.7400        | 883.8737         | 1765.7560        | 883.3817         | M    | <b>1441.6046</b> | 721.3059         | 1424.5781      | 712.7927         | 1423.5940      | 712.3007         | 13 |
| 16 | <b>1898.7935</b> | <b>949.9004</b>  | 1881.7670        | 941.3871         | 1880.7830        | 940.8951         | D    | 1294.5692        | 647.7882         | 1277.5427      | 639.2750         | 1276.5586      | 638.7830         | 12 |
| 17 | 1955.8150        | 978.4111         | 1938.7884        | 969.8979         | 1937.8044        | 969.4059         | G    | 1179.5423        | 590.2748         | 1162.5157      | 581.7615         | 1161.5317      | 581.2695         | 11 |
| 18 | 2026.8521        | 1013.9297        | 2009.8256        | <b>1005.4164</b> | 2008.8415        | <b>1004.9244</b> | A    | 1122.5208        | 561.7640         | 1105.4942      | 553.2508         | 1104.5102      | 552.7588         | 10 |
| 19 | 2113.8841        | 1057.4457        | 2096.8576        | 1048.9324        | 2095.8736        | 1048.4404        | S    | <b>1051.4837</b> | 526.2455         | 1034.4571      | 517.7322         | 1033.4731      | 517.2402         | 9  |
| 20 | 2228.9111        | <b>1114.9592</b> | 2211.8845        | 1106.4459        | 2210.9005        | 1105.9539        | N    | <b>964.4517</b>  | 482.7295         | 947.4251       | 474.2162         | 946.4411       | 473.7242         | 8  |
| 21 | 2327.9795        | <b>1164.4934</b> | 2310.9529        | 1155.9801        | 2309.9689        | 1155.4881        | V    | <b>849.4247</b>  | 425.2160         | 832.3982       | 416.7027         | 831.4141       | 416.2107         | 7  |
| 22 | 2429.0272        | 1215.0172        | 2412.0006        | 1206.5040        | 2411.0166        | 1206.0119        | T    | <b>750.3563</b>  | <b>375.6818</b>  | 733.3297       | 367.1685         | 732.3457       | 366.6765         | 6  |

|    |           |           |           |           |           |           |   |          |          |          |          |          |          |   |
|----|-----------|-----------|-----------|-----------|-----------|-----------|---|----------|----------|----------|----------|----------|----------|---|
| 23 | 2589.0578 | 1295.0325 | 2572.0313 | 1286.5193 | 2571.0473 | 1286.0273 | C | 649.3086 | 325.1579 | 632.2821 | 316.6447 | 631.2981 | 316.1527 | 5 |
| 24 | 2702.1419 | 1351.5746 | 2685.1153 | 1343.0613 | 2684.1313 | 1342.5693 | I | 489.2780 | 245.1426 | 472.2514 | 236.6293 | 471.2674 | 236.1373 | 4 |
| 25 | 2816.1848 | 1408.5960 | 2799.1583 | 1400.0828 | 2798.1742 | 1399.5908 | N | 376.1939 | 188.6006 | 359.1674 | 180.0873 | 358.1833 | 179.5953 | 3 |
| 26 | 2903.2168 | 1452.1121 | 2886.1903 | 1443.5988 | 2885.2063 | 1443.1068 | S | 262.1510 | 131.5791 | 245.1244 | 123.0659 | 244.1404 | 122.5738 | 2 |
| 27 |           |           |           |           |           |           | R | 175.1190 | 88.0631  | 158.0924 | 79.5498  |          |          | 1 |

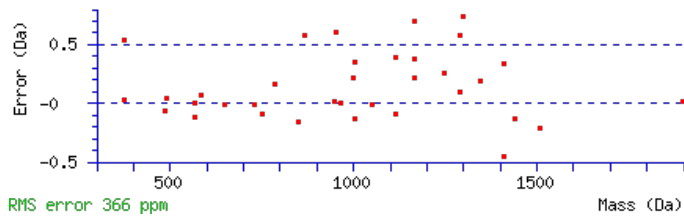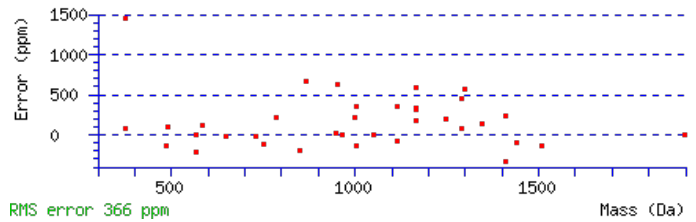

NCBI **BLAST** search of [AGEQVITYTCATYYKMDGASNVTCINSR](#)  
 (Parameters: blastp, nr protein database, expect=20000, no filter, PAM30)  
 Other BLAST [web gateways](#)

**All matches to this query**

| Score | Mr(calc)  | Delta  | Sequence                                     | Site Analysis         |
|-------|-----------|--------|----------------------------------------------|-----------------------|
| 73.4  | 3076.3212 | 0.0030 | <a href="#">AGEQVITYTCATYYKMDGASNVTCINSR</a> | Deamidated N20 99.01% |
| 53.3  | 3076.3212 | 0.0030 | <a href="#">AGEQVITYTCATYYKMDGASNVTCINSR</a> | Deamidated N25 0.97%  |
| 35.7  | 3076.3212 | 0.0030 | <a href="#">AGEQVITYTCATYYKMDGASNVTCINSR</a> | Deamidated Q4 0.02%   |
| 3.6   | 3076.3187 | 0.0054 | <a href="#">EMPEVSDAGQAYKCFCPQGQIPMGADR</a>  |                       |

Mascot: <http://www.matrixscience.com/>

# MATRIX SCIENCE Mascot Search Results

## Peptide View

MS/MS Fragmentation of **WDPEVNC SMAQIQLCPPPPQIPNSHNM TTTLN YR**

Found in **P08603** in **con\_Xuniprot\_HUMAN3**, CFAH\_HUMAN Complement factor H OS=Homo sapiens GN=CFH PE=1 SV=4

Match to Query 28344: 4026.823932 from(1343.281920,3+) intensity(15620.7725) rtinseconds(1816) scans(4721) index(6536)

Title: 111019\_Est\_ISCardio\_NMI\_YP\_G\_9Spectrum4149\_scans\_\_4721

Data file C:\mascot\20140703\_Tmgf\_1D\CSV\_UseAnalysis\MasterCSV\All\_Glyco\mgf\ptm\UC18ERLIC\_PTM\_35D.mgf

Click mouse within plot area to zoom in by factor of two about that point

Or, to Da

Label all possible matches Label matches used for scoring

Show Y-axis

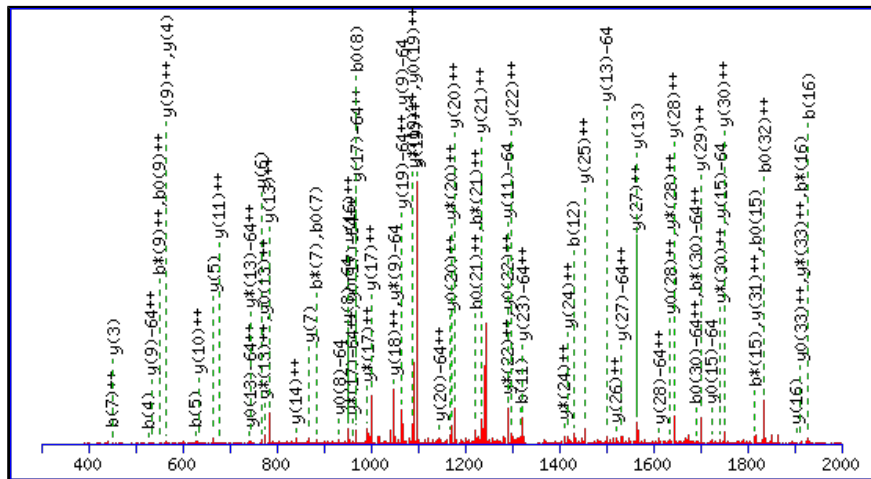

Monoisotopic mass of neutral peptide Mr(calc): 4025.8168

Fixed modifications: Carbamidomethyl (C) (apply to specified residues or termini only)

Variable modifications:

N26 : Deamidated (NQ)

M27 : Oxidation (M), with neutral losses 0.0000(shown in table), 63.9983

Ions Score: 73 Expect: 6.9e-006

Matches : 80/574 fragment ions using 147 most intense peaks ([help](#))

| #  | b         | b <sup>++</sup> | b <sup>*</sup> | b <sup>*++</sup> | b <sup>0</sup> | b <sup>0++</sup> | Seq. | y         | y <sup>++</sup> | y <sup>*</sup> | y <sup>*++</sup> | y <sup>0</sup> | y <sup>0++</sup> | #  |
|----|-----------|-----------------|----------------|------------------|----------------|------------------|------|-----------|-----------------|----------------|------------------|----------------|------------------|----|
| 1  | 187.0866  | 94.0469         |                |                  |                |                  | W    |           |                 |                |                  |                |                  | 34 |
| 2  | 302.1135  | 151.5604        |                |                  | 284.1030       | 142.5551         | D    | 3840.7448 | 1920.8761       | 3823.7183      | 1912.3628        | 3822.7343      | 1911.8708        | 33 |
| 3  | 399.1663  | 200.0868        |                |                  | 381.1557       | 191.0815         | P    | 3725.7179 | 1863.3626       | 3708.6913      | 1854.8493        | 3707.7073      | 1854.3573        | 32 |
| 4  | 528.2089  | 264.6081        |                |                  | 510.1983       | 255.6028         | E    | 3628.6651 | 1814.8362       | 3611.6386      | 1806.3229        | 3610.6546      | 1805.8309        | 31 |
| 5  | 627.2773  | 314.1423        |                |                  | 609.2667       | 305.1370         | V    | 3499.6225 | 1750.3149       | 3482.5960      | 1741.8016        | 3481.6120      | 1741.3096        | 30 |
| 6  | 741.3202  | 371.1638        | 724.2937       | 362.6505         | 723.3097       | 362.1585         | N    | 3400.5541 | 1700.7807       | 3383.5276      | 1692.2674        | 3382.5436      | 1691.7754        | 29 |
| 7  | 901.3509  | 451.1791        | 884.3243       | 442.6658         | 883.3403       | 442.1738         | C    | 3286.5112 | 1643.7592       | 3269.4846      | 1635.2460        | 3268.5006      | 1634.7540        | 28 |
| 8  | 988.3829  | 494.6951        | 971.3564       | 486.1818         | 970.3723       | 485.6898         | S    | 3126.4805 | 1563.7439       | 3109.4540      | 1555.2306        | 3108.4700      | 1554.7386        | 27 |
| 9  | 1119.4234 | 560.2153        | 1102.3968      | 551.7021         | 1101.4128      | 551.2101         | M    | 3039.4485 | 1520.2279       | 3022.4220      | 1511.7146        | 3021.4379      | 1511.2226        | 26 |
| 10 | 1190.4605 | 595.7339        | 1173.4340      | 587.2206         | 1172.4499      | 586.7286         | A    | 2908.4080 | 1454.7077       | 2891.3815      | 1446.1944        | 2890.3975      | 1445.7024        | 25 |
| 11 | 1318.5191 | 659.7632        | 1301.4925      | 651.2499         | 1300.5085      | 650.7579         | Q    | 2837.3709 | 1419.1891       | 2820.3444      | 1410.6758        | 2819.3603      | 1410.1838        | 24 |
| 12 | 1431.6031 | 716.3052        | 1414.5766      | 707.7919         | 1413.5926      | 707.2999         | I    | 2709.3123 | 1355.1598       | 2692.2858      | 1346.6465        | 2691.3018      | 1346.1545        | 23 |
| 13 | 1559.6617 | 780.3345        | 1542.6352      | 771.8212         | 1541.6512      | 771.3292         | Q    | 2596.2283 | 1298.6178       | 2579.2017      | 1290.1045        | 2578.2177      | 1289.6125        | 22 |
| 14 | 1672.7458 | 836.8765        | 1655.7192      | 828.3633         | 1654.7352      | 827.8713         | L    | 2468.1697 | 1234.5885       | 2451.1431      | 1226.0752        | 2450.1591      | 1225.5832        | 21 |
| 15 | 1832.7764 | 916.8919        | 1815.7499      | 908.3786         | 1814.7659      | 907.8866         | C    | 2355.0856 | 1178.0465       | 2338.0591      | 1169.5332        | 2337.0751      | 1169.0412        | 20 |
| 16 | 1929.8292 | 965.4182        | 1912.8027      | 956.9050         | 1911.8186      | 956.4130         | P    | 2195.0550 | 1098.0311       | 2178.0284      | 1089.5179        | 2177.0444      | 1089.0258        | 19 |
| 17 | 2026.8820 | 1013.9446       | 2009.8554      | 1005.4313        | 2008.8714      | 1004.9393        | P    | 2098.0022 | 1049.5047       | 2080.9757      | 1040.9915        | 2079.9917      | 1040.4995        | 18 |
| 18 | 2123.9347 | 1062.4710       | 2106.9082      | 1053.9577        | 2105.9242      | 1053.4657        | P    | 2000.9495 | 1000.9784       | 1983.9229      | 992.4651         | 1982.9389      | 991.9731         | 17 |
| 19 | 2220.9875 | 1110.9974       | 2203.9609      | 1102.4841        | 2202.9769      | 1101.9921        | P    | 1903.8967 | 952.4520        | 1886.8701      | 943.9387         | 1885.8861      | 943.4467         | 16 |
| 20 | 2349.0461 | 1175.0267       | 2332.0195      | 1166.5134        | 2331.0355      | 1166.0214        | Q    | 1806.8439 | 903.9256        | 1789.8174      | 895.4123         | 1788.8334      | 894.9203         | 15 |
| 21 | 2462.1301 | 1231.5687       | 2445.1036      | 1223.0554        | 2444.1196      | 1222.5634        | I    | 1678.7853 | 839.8963        | 1661.7588      | 831.3830         | 1660.7748      | 830.8910         | 14 |
| 22 | 2559.1829 | 1280.0951       | 2542.1564      | 1271.5818        | 2541.1723      | 1271.0898        | P    | 1565.7013 | 783.3543        | 1548.6747      | 774.8410         | 1547.6907      | 774.3490         | 13 |

|    |           |           |           |           |           |           |   |           |          |           |          |           |          |    |
|----|-----------|-----------|-----------|-----------|-----------|-----------|---|-----------|----------|-----------|----------|-----------|----------|----|
| 23 | 2673.2258 | 1337.1166 | 2656.1993 | 1328.6033 | 2655.2153 | 1328.1113 | N | 1468.6485 | 734.8279 | 1451.6220 | 726.3146 | 1450.6380 | 725.8226 | 12 |
| 24 | 2760.2579 | 1380.6326 | 2743.2313 | 1372.1193 | 2742.2473 | 1371.6273 | S | 1354.6056 | 677.8064 | 1337.5790 | 669.2932 | 1336.5950 | 668.8012 | 11 |
| 25 | 2897.3168 | 1449.1620 | 2880.2902 | 1440.6487 | 2879.3062 | 1440.1567 | H | 1267.5736 | 634.2904 | 1250.5470 | 625.7771 | 1249.5630 | 625.2851 | 10 |
| 26 | 3012.3437 | 1506.6755 | 2995.3172 | 1498.1622 | 2994.3331 | 1497.6702 | N | 1130.5147 | 565.7610 | 1113.4881 | 557.2477 | 1112.5041 | 556.7557 | 9  |
| 27 | 3159.3791 | 1580.1932 | 3142.3526 | 1571.6799 | 3141.3685 | 1571.1879 | M | 1015.4877 | 508.2475 | 998.4612  | 499.7342 | 997.4771  | 499.2422 | 8  |
| 28 | 3260.4268 | 1630.7170 | 3243.4002 | 1622.2038 | 3242.4162 | 1621.7118 | T | 868.4523  | 434.7298 | 851.4258  | 426.2165 | 850.4417  | 425.7245 | 7  |
| 29 | 3361.4745 | 1681.2409 | 3344.4479 | 1672.7276 | 3343.4639 | 1672.2356 | T | 767.4046  | 384.2060 | 750.3781  | 375.6927 | 749.3941  | 375.2007 | 6  |
| 30 | 3462.5221 | 1731.7647 | 3445.4956 | 1723.2514 | 3444.5116 | 1722.7594 | T | 666.3570  | 333.6821 | 649.3304  | 325.1688 | 648.3464  | 324.6768 | 5  |
| 31 | 3575.6062 | 1788.3067 | 3558.5797 | 1779.7935 | 3557.5956 | 1779.3015 | L | 565.3093  | 283.1583 | 548.2827  | 274.6450 |           |          | 4  |
| 32 | 3689.6491 | 1845.3282 | 3672.6226 | 1836.8149 | 3671.6386 | 1836.3229 | N | 452.2252  | 226.6162 | 435.1987  | 218.1030 |           |          | 3  |
| 33 | 3852.7125 | 1926.8599 | 3835.6859 | 1918.3466 | 3834.7019 | 1917.8546 | Y | 338.1823  | 169.5948 | 321.1557  | 161.0815 |           |          | 2  |
| 34 |           |           |           |           |           |           | R | 175.1190  | 88.0631  | 158.0924  | 79.5498  |           |          | 1  |

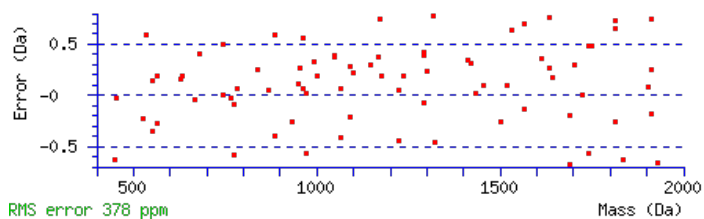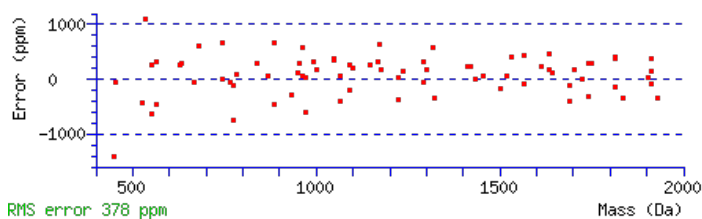

NCBI BLAST search of [WDPEVNC SMAQIQLCPPPPQIPNSHNMTTTLNYR](#)

(Parameters: blastp, nr protein database, expect=20000, no filter, PAM30)

Other BLAST [web gateways](#)

All matches to this query

| Score | Mr(calc)  | Delta  | Sequence                                            | Site Analysis                         |
|-------|-----------|--------|-----------------------------------------------------|---------------------------------------|
| 72.9  | 4025.8168 | 1.0071 | <a href="#">WDPEVNC SMAQIQLCPPPPQIPNSHNMTTTLNYR</a> | Deamidated N26, Oxidation M27; 53.78% |
| 70.9  | 4025.8168 | 1.0071 | <a href="#">WDPEVNC SMAQIQLCPPPPQIPNSHNMTTTLNYR</a> | Deamidated N32, Oxidation M27; 33.93% |
| 63.6  | 4025.8168 | 1.0071 | <a href="#">WDPEVNC SMAQIQLCPPPPQIPNSHNMTTTLNYR</a> | Deamidated N23, Oxidation M27; 6.45%  |
| 61.6  | 4025.8168 | 1.0071 | <a href="#">WDPEVNC SMAQIQLCPPPPQIPNSHNMTTTLNYR</a> | Deamidated Q20, Oxidation M27; 4.07%  |
| 55.8  | 4025.8168 | 1.0071 | <a href="#">WDPEVNC SMAQIQLCPPPPQIPNSHNMTTTLNYR</a> | Deamidated Q11, Oxidation M27; 1.05%  |
| 53.9  | 4025.8168 | 1.0071 | <a href="#">WDPEVNC SMAQIQLCPPPPQIPNSHNMTTTLNYR</a> | Deamidated Q13, Oxidation M27; 0.69%  |
| 40.2  | 4025.8168 | 1.0071 | <a href="#">WDPEVNC SMAQIQLCPPPPQIPNSHNMTTTLNYR</a> | Deamidated N6, Oxidation M27; 0.03%   |
| 26.8  | 4024.8328 | 1.9911 | <a href="#">WDPEVNC SMAQIQLCPPPPQIPNSHNMTTTLNYR</a> |                                       |
| 15.2  | 4025.8168 | 1.0071 | <a href="#">WDPEVNC SMAQIQLCPPPPQIPNSHNMTTTLNYR</a> | Deamidated N32, Oxidation M9; 0.00%   |
| 15.0  | 4025.8168 | 1.0071 | <a href="#">WDPEVNC SMAQIQLCPPPPQIPNSHNMTTTLNYR</a> | Deamidated N26, Oxidation M9; 0.00%   |

Mascot: <http://www.matrixscience.com/>

# MATRIX SCIENCE Mascot Search Results

## Peptide View

MS/MS Fragmentation of **IPCSQPPQIEHGTINSSR**

Found in **P08603** in **con\_Xuniprot\_HUMAN3**, CFAH\_HUMAN Complement factor H OS=Homo sapiens GN=CFH PE=1 SV=4

Match to Query 12588: 2021.950548 from(1011.982550,2+) intensity(68493.7969) rtinseconds(618) scans(1308) index(2493)

Title: 111019\_Est\_ISCardio\_NMI\_YP\_G\_5Spectrum1101\_scans\_\_1308

Data file C:\\mascot\\20140703\_Tmgf\_1D\\CSV\_UseAnalysis\\MasterCSV\\All\_Glyco\\mgf\\ptm\\UC18ERLIC\_PTM\_35D.mgf

Click mouse within plot area to zoom in by factor of two about that point

Or, to Da

Label all possible matches Label matches used for scoring

Show Y-axis

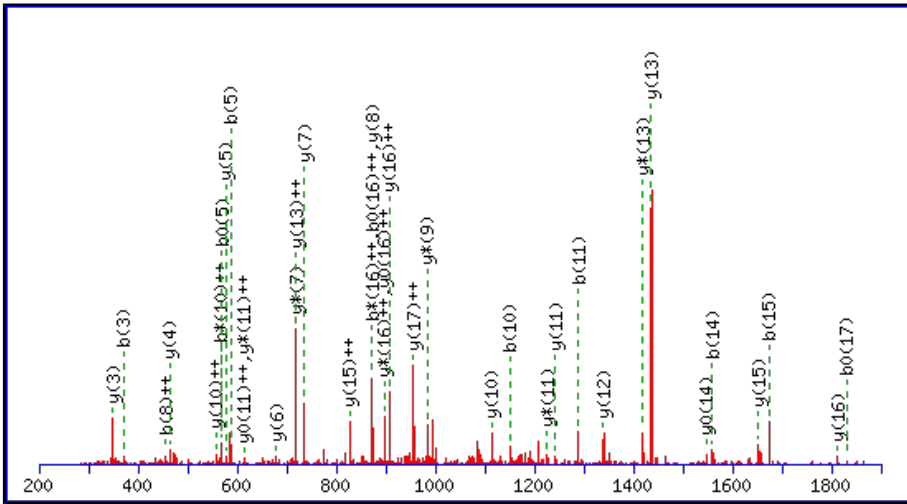

Monoisotopic mass of neutral peptide Mr(calc): 2021.9476

Fixed modifications: Carbamidomethyl (C) (apply to specified residues or termini only)

Variable modifications:

Q5 : Deamidated (NQ)

N15 : Deamidated (NQ)

Ions Score: 73 Expect: 1.2e-005

Matches : 38/188 fragment ions using 64 most intense peaks ([help](#))

| #  | b                | b <sup>++</sup> | b <sup>*</sup> | b <sup>*++</sup> | b <sup>0</sup>   | b <sup>0++</sup> | Seq. | y                | y <sup>++</sup> | y <sup>*</sup>   | y <sup>*++</sup> | y <sup>0</sup>   | y <sup>0++</sup> | #  |
|----|------------------|-----------------|----------------|------------------|------------------|------------------|------|------------------|-----------------|------------------|------------------|------------------|------------------|----|
| 1  | 114.0913         | 57.5493         |                |                  |                  |                  | I    |                  |                 |                  |                  |                  |                  | 18 |
| 2  | 211.1441         | 106.0757        |                |                  |                  |                  | P    | 1909.8709        | 955.4391        | 1892.8443        | 946.9258         | 1891.8603        | 946.4338         | 17 |
| 3  | <b>371.1748</b>  | 186.0910        |                |                  |                  |                  | C    | <b>1812.8181</b> | <b>906.9127</b> | 1795.7916        | <b>898.3994</b>  | 1794.8075        | <b>897.9074</b>  | 16 |
| 4  | 458.2068         | 229.6070        |                |                  | 440.1962         | 220.6017         | S    | <b>1652.7875</b> | <b>826.8974</b> | 1635.7609        | 818.3841         | 1634.7769        | 817.8921         | 15 |
| 5  | <b>587.2494</b>  | 294.1283        | 570.2228       | 285.6151         | <b>569.2388</b>  | 285.1230         | Q    | 1565.7554        | 783.3814        | 1548.7289        | 774.8681         | <b>1547.7449</b> | 774.3761         | 14 |
| 6  | 684.3021         | 342.6547        | 667.2756       | 334.1414         | 666.2916         | 333.6494         | P    | <b>1436.7128</b> | <b>718.8601</b> | <b>1419.6863</b> | 710.3468         | 1418.7023        | 709.8548         | 13 |
| 7  | 781.3549         | 391.1811        | 764.3284       | 382.6678         | 763.3443         | 382.1758         | P    | <b>1339.6601</b> | 670.3337        | 1322.6335        | 661.8204         | 1321.6495        | 661.3284         | 12 |
| 8  | 909.4135         | <b>455.2104</b> | 892.3869       | 446.6971         | 891.4029         | 446.2051         | Q    | <b>1242.6073</b> | 621.8073        | <b>1225.5808</b> | <b>613.2940</b>  | 1224.5967        | <b>612.8020</b>  | 11 |
| 9  | 1022.4975        | 511.7524        | 1005.4710      | 503.2391         | 1004.4870        | 502.7471         | I    | <b>1114.5487</b> | <b>557.7780</b> | 1097.5222        | 549.2647         | 1096.5382        | 548.7727         | 10 |
| 10 | <b>1151.5401</b> | 576.2737        | 1134.5136      | <b>567.7604</b>  | 1133.5296        | 567.2684         | E    | 1001.4647        | 501.2360        | <b>984.4381</b>  | 492.7227         | 983.4541         | 492.2307         | 9  |
| 11 | <b>1288.5991</b> | 644.8032        | 1271.5725      | 636.2899         | 1270.5885        | 635.7979         | H    | <b>872.4221</b>  | 436.7147        | 855.3955         | 428.2014         | 854.4115         | 427.7094         | 8  |
| 12 | 1345.6205        | 673.3139        | 1328.5940      | 664.8006         | 1327.6099        | 664.3086         | G    | <b>735.3632</b>  | 368.1852        | <b>718.3366</b>  | 359.6719         | 717.3526         | 359.1799         | 7  |
| 13 | 1446.6682        | 723.8377        | 1429.6416      | 715.3245         | 1428.6576        | 714.8325         | T    | <b>678.3417</b>  | 339.6745        | 661.3151         | 331.1612         | 660.3311         | 330.6692         | 6  |
| 14 | <b>1559.7523</b> | 780.3798        | 1542.7257      | 771.8665         | 1541.7417        | 771.3745         | I    | <b>577.2940</b>  | 289.1506        | 560.2675         | 280.6374         | 559.2835         | 280.1454         | 5  |
| 15 | <b>1674.7792</b> | 837.8932        | 1657.7527      | 829.3800         | 1656.7686        | 828.8880         | N    | <b>464.2100</b>  | 232.6086        | 447.1834         | 224.0953         | 446.1994         | 223.6033         | 4  |
| 16 | 1761.8112        | 881.4093        | 1744.7847      | <b>872.8960</b>  | 1743.8007        | <b>872.4040</b>  | S    | <b>349.1830</b>  | 175.0951        | 332.1565         | 166.5819         | 331.1724         | 166.0899         | 3  |
| 17 | 1848.8433        | 924.9253        | 1831.8167      | 916.4120         | <b>1830.8327</b> | 915.9200         | S    | 262.1510         | 131.5791        | 245.1244         | 123.0659         | 244.1404         | 122.5738         | 2  |
| 18 |                  |                 |                |                  |                  |                  | R    | 175.1190         | 88.0631         | 158.0924         | 79.5498          |                  |                  | 1  |

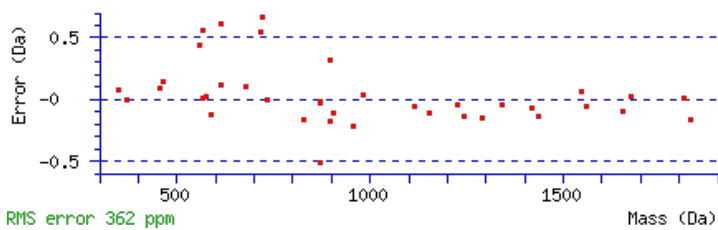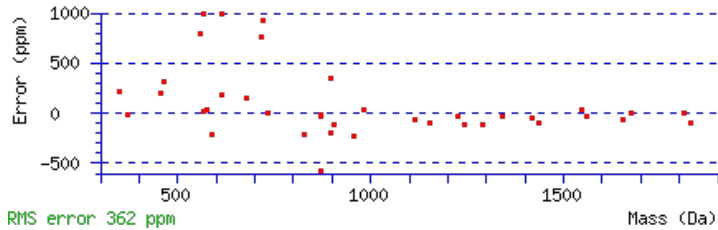

NCBI BLAST search of [IPCSQPPQIEHGTINSSR](#)

(Parameters: blastp, nr protein database, expect=20000, no filter, PAM30)

Other BLAST [web gateways](#)

**All matches to this query**

| Score | Mr(calc)  | Delta   | Sequence                            | Site Analysis             |
|-------|-----------|---------|-------------------------------------|---------------------------|
| 72.7  | 2021.9476 | 0.0029  | <a href="#">IPCSQPPQIEHGTINSSR</a>  | Deamidated Q5, N15 92.14% |
| 62.0  | 2021.9476 | 0.0029  | <a href="#">IPCSQPPQIEHGTINSSR</a>  | Deamidated Q8, N15 7.86%  |
| 25.3  | 2021.9476 | 0.0029  | <a href="#">IPCSQPPQIEHGTINSSR</a>  | Deamidated Q5, Q8 0.00%   |
| 5.3   | 2020.9445 | 1.0060  | <a href="#">QLLVEVERMECATPSDK</a>   |                           |
| 0.2   | 2021.9550 | -0.0045 | <a href="#">KGYAEALVEPTMMKTGHSG</a> |                           |
| 0.0   | 2021.9582 | -0.0077 | <a href="#">YVQPPTTPEFGGNPSTTK</a>  |                           |

Mascot: <http://www.matrixscience.com/>



# MATRIX SCIENCE Mascot Search Results

## Peptide View

MS/MS Fragmentation of **WDPEVNC SMAQIQLCPPPPQIPNSHNMTTLN YR**

Found in **P08603** in **con\_Xuniprot\_HUMAN3**, CFAH\_HUMAN Complement factor H OS=Homo sapiens GN=CFH PE=1 SV=4

Match to Query 28351: 4027.818012 from(1343.613280,3+) intensity(0.0000) rtinseconds(1829) scans(4756) index(6538)

Title: 111019\_Est\_ISCardio\_NMI\_YP\_G\_9Spectrum4181\_scans\_\_4756

Data file C:\mascot\20140703\_Tmgf\_1D\CSV\_UseAnalysis\MasterCSV\All\_Glyco\mgf\ptm\UC18ERLIC\_PTM\_35D.mgf

Click mouse within plot area to zoom in by factor of two about that point

Or, to Da

Label all possible matches Label matches used for scoring

Show Y-axis

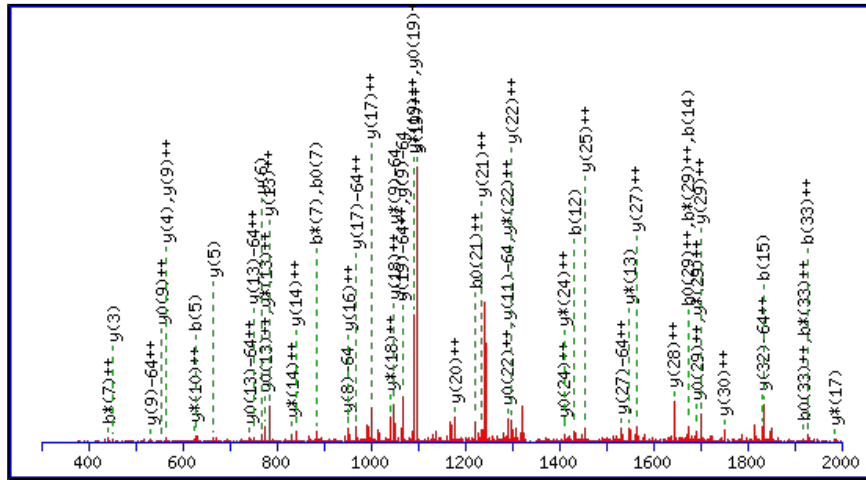

Monoisotopic mass of neutral peptide Mr(calc): 4026.8009

Fixed modifications: Carbamidomethyl (C) (apply to specified residues or termini only)

Variable modifications:

N23 : Deamidated (NQ)

N26 : Deamidated (NQ)

M27 : Oxidation (M), with neutral losses 0.0000(shown in table), 63.9983

Ions Score: 72 Expect: 8.7e-006

Matches : 59/574 fragment ions using 85 most intense peaks ([help](#))

| #  | b                | b <sup>++</sup> | b <sup>*</sup>  | b <sup>*++</sup> | b <sup>0</sup>  | b <sup>0++</sup> | Seq. | y         | y <sup>++</sup>  | y <sup>*</sup>   | y <sup>*++</sup> | y <sup>0</sup> | y <sup>0++</sup> | #  |
|----|------------------|-----------------|-----------------|------------------|-----------------|------------------|------|-----------|------------------|------------------|------------------|----------------|------------------|----|
| 1  | 187.0866         | 94.0469         |                 |                  |                 |                  | W    |           |                  |                  |                  |                |                  | 34 |
| 2  | 302.1135         | 151.5604        |                 |                  | 284.1030        | 142.5551         | D    | 3841.7288 | 1921.3681        | 3824.7023        | 1912.8548        | 3823.7183      | 1912.3628        | 33 |
| 3  | 399.1663         | 200.0868        |                 |                  | 381.1557        | 191.0815         | P    | 3726.7019 | 1863.8546        | 3709.6754        | 1855.3413        | 3708.6913      | 1854.8493        | 32 |
| 4  | 528.2089         | 264.6081        |                 |                  | 510.1983        | 255.6028         | E    | 3629.6491 | 1815.3282        | 3612.6226        | 1806.8149        | 3611.6386      | 1806.3229        | 31 |
| 5  | <b>627.2773</b>  | 314.1423        |                 |                  | 609.2667        | 305.1370         | V    | 3500.6065 | <b>1750.8069</b> | 3483.5800        | 1742.2936        | 3482.5960      | 1741.8016        | 30 |
| 6  | 741.3202         | 371.1638        | 724.2937        | 362.6505         | 723.3097        | 362.1585         | N    | 3401.5381 | <b>1701.2727</b> | 3384.5116        | <b>1692.7594</b> | 3383.5276      | <b>1692.2674</b> | 29 |
| 7  | 901.3509         | 451.1791        | <b>884.3243</b> | <b>442.6658</b>  | <b>883.3403</b> | 442.1738         | C    | 3287.4952 | <b>1644.2512</b> | 3270.4687        | 1635.7380        | 3269.4846      | 1635.2460        | 28 |
| 8  | 988.3829         | 494.6951        | 971.3564        | 486.1818         | 970.3723        | 485.6898         | S    | 3127.4646 | <b>1564.2359</b> | 3110.4380        | 1555.7226        | 3109.4540      | 1555.2306        | 27 |
| 9  | 1119.4234        | 560.2153        | 1102.3968       | 551.7021         | 1101.4128       | 551.2101         | M    | 3040.4325 | 1520.7199        | 3023.4060        | 1512.2066        | 3022.4220      | 1511.7146        | 26 |
| 10 | 1190.4605        | 595.7339        | 1173.4340       | 587.2206         | 1172.4499       | 586.7286         | A    | 2909.3920 | <b>1455.1997</b> | 2892.3655        | 1446.6864        | 2891.3815      | 1446.1944        | 25 |
| 11 | 1318.5191        | 659.7632        | 1301.4925       | 651.2499         | 1300.5085       | 650.7579         | Q    | 2838.3549 | 1419.6811        | 2821.3284        | <b>1411.1678</b> | 2820.3444      | <b>1410.6758</b> | 24 |
| 12 | <b>1431.6031</b> | 716.3052        | 1414.5766       | 707.7919         | 1413.5926       | 707.2999         | I    | 2710.2964 | 1355.6518        | 2693.2698        | 1347.1385        | 2692.2858      | 1346.6465        | 23 |
| 13 | 1559.6617        | 780.3345        | 1542.6352       | 771.8212         | 1541.6512       | 771.3292         | Q    | 2597.2123 | <b>1299.1098</b> | 2580.1857        | <b>1290.5965</b> | 2579.2017      | <b>1290.1045</b> | 22 |
| 14 | <b>1672.7458</b> | 836.8765        | 1655.7192       | 828.3633         | 1654.7352       | 827.8713         | L    | 2469.1537 | <b>1235.0805</b> | 2452.1272        | 1226.5672        | 2451.1431      | 1226.0752        | 21 |
| 15 | <b>1832.7764</b> | 916.8919        | 1815.7499       | 908.3786         | 1814.7659       | 907.8866         | C    | 2356.0696 | <b>1178.5385</b> | 2339.0431        | 1170.0252        | 2338.0591      | 1169.5332        | 20 |
| 16 | 1929.8292        | 965.4182        | 1912.8027       | 956.9050         | 1911.8186       | 956.4130         | P    | 2196.0390 | <b>1098.5231</b> | 2179.0124        | <b>1090.0099</b> | 2178.0284      | <b>1089.5179</b> | 19 |
| 17 | 2026.8820        | 1013.9446       | 2009.8554       | 1005.4313        | 2008.8714       | 1004.9393        | P    | 2098.9862 | <b>1049.9968</b> | 2081.9597        | <b>1041.4835</b> | 2080.9757      | 1040.9915        | 18 |
| 18 | 2123.9347        | 1062.4710       | 2106.9082       | 1053.9577        | 2105.9242       | 1053.4657        | P    | 2001.9335 | <b>1001.4704</b> | <b>1984.9069</b> | 992.9571         | 1983.9229      | 992.4651         | 17 |
| 19 | 2220.9875        | 1110.9974       | 2203.9609       | 1102.4841        | 2202.9769       | 1101.9921        | P    | 1904.8807 | <b>952.9440</b>  | 1887.8542        | 944.4307         | 1886.8701      | 943.9387         | 16 |
| 20 | 2349.0461        | 1175.0267       | 2332.0195       | 1166.5134        | 2331.0355       | 1166.0214        | Q    | 1807.8279 | 904.4176         | 1790.8014        | 895.9043         | 1789.8174      | 895.4123         | 15 |
| 21 | 2462.1301        | 1231.5687       | 2445.1036       | 1223.0554        | 2444.1196       | <b>1222.5634</b> | I    | 1679.7694 | <b>840.3883</b>  | 1662.7428        | <b>831.8750</b>  | 1661.7588      | 831.3830         | 14 |
| 22 | 2559.1829        | 1280.0951       | 2542.1564       | 1271.5818        | 2541.1723       | 1271.0898        | P    | 1566.6853 | <b>783.8463</b>  | <b>1549.6587</b> | <b>775.3330</b>  | 1548.6747      | <b>774.8410</b>  | 13 |



|    |           |           |           |           |           |           |   |           |          |           |          |           |          |    |
|----|-----------|-----------|-----------|-----------|-----------|-----------|---|-----------|----------|-----------|----------|-----------|----------|----|
| 23 | 2674.2098 | 1337.6086 | 2657.1833 | 1329.0953 | 2656.1993 | 1328.6033 | N | 1469.6325 | 735.3199 | 1452.6060 | 726.8066 | 1451.6220 | 726.3146 | 12 |
| 24 | 2761.2419 | 1381.1246 | 2744.2153 | 1372.6113 | 2743.2313 | 1372.1193 | S | 1354.6056 | 677.8064 | 1337.5790 | 669.2932 | 1336.5950 | 668.8012 | 11 |
| 25 | 2898.3008 | 1449.6540 | 2881.2742 | 1441.1408 | 2880.2902 | 1440.6487 | H | 1267.5736 | 634.2904 | 1250.5470 | 625.7771 | 1249.5630 | 625.2851 | 10 |
| 26 | 3013.3277 | 1507.1675 | 2996.3012 | 1498.6542 | 2995.3172 | 1498.1622 | N | 1130.5147 | 565.7610 | 1113.4881 | 557.2477 | 1112.5041 | 556.7557 | 9  |
| 27 | 3160.3631 | 1580.6852 | 3143.3366 | 1572.1719 | 3142.3526 | 1571.6799 | M | 1015.4877 | 508.2475 | 998.4612  | 499.7342 | 997.4771  | 499.2422 | 8  |
| 28 | 3261.4108 | 1631.2090 | 3244.3843 | 1622.6958 | 3243.4002 | 1622.2038 | T | 868.4523  | 434.7298 | 851.4258  | 426.2165 | 850.4417  | 425.7245 | 7  |
| 29 | 3362.4585 | 1681.7329 | 3345.4319 | 1673.2196 | 3344.4479 | 1672.7276 | T | 767.4046  | 384.2060 | 750.3781  | 375.6927 | 749.3941  | 375.2007 | 6  |
| 30 | 3463.5062 | 1732.2567 | 3446.4796 | 1723.7434 | 3445.4956 | 1723.2514 | T | 666.3570  | 333.6821 | 649.3304  | 325.1688 | 648.3464  | 324.6768 | 5  |
| 31 | 3576.5902 | 1788.7988 | 3559.5637 | 1780.2855 | 3558.5797 | 1779.7935 | L | 565.3093  | 283.1583 | 548.2827  | 274.6450 |           |          | 4  |
| 32 | 3690.6332 | 1845.8202 | 3673.6066 | 1837.3069 | 3672.6226 | 1836.8149 | N | 452.2252  | 226.6162 | 435.1987  | 218.1030 |           |          | 3  |
| 33 | 3853.6965 | 1927.3519 | 3836.6699 | 1918.8386 | 3835.6859 | 1918.3466 | Y | 338.1823  | 169.5948 | 321.1557  | 161.0815 |           |          | 2  |
| 34 |           |           |           |           |           |           | R | 175.1190  | 88.0631  | 158.0924  | 79.5498  |           |          | 1  |

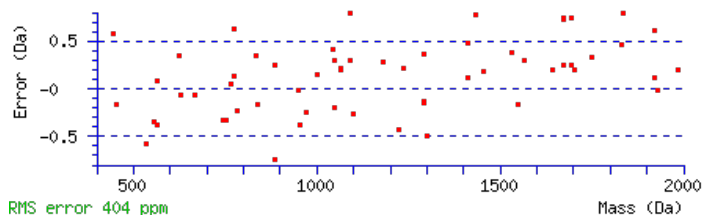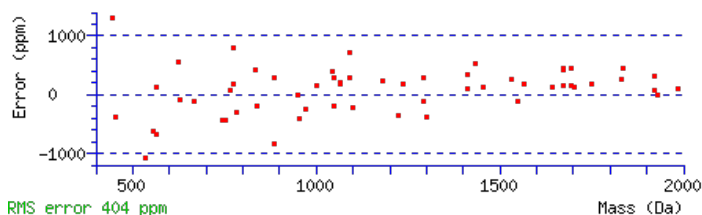

NCBI BLAST search of [WDPEVNC SMAQIQLCPPPPQIPNSHNMTTTLNYR](#)

(Parameters: blastp, nr protein database, expect=20000, no filter, PAM30)

Other BLAST [web gateways](#)

All matches to this query

| Score | Mr(calc)  | Delta  | Sequence                                            | Site Analysis                              |
|-------|-----------|--------|-----------------------------------------------------|--------------------------------------------|
| 71.8  | 4026.8009 | 1.0172 | <a href="#">WDPEVNC SMAQIQLCPPPPQIPNSHNMTTTLNYR</a> | Deamidated N23, N26, Oxidation M27; 72.22% |
| 66.8  | 4026.8009 | 1.0172 | <a href="#">WDPEVNC SMAQIQLCPPPPQIPNSHNMTTTLNYR</a> | Deamidated Q20, N23, Oxidation M27; 23.05% |
| 56.5  | 4025.8168 | 2.0012 | <a href="#">WDPEVNC SMAQIQLCPPPPQIPNSHNMTTTLNYR</a> |                                            |
| 54.6  | 4025.8168 | 2.0012 | <a href="#">WDPEVNC SMAQIQLCPPPPQIPNSHNMTTTLNYR</a> |                                            |
| 54.0  | 4026.8009 | 1.0172 | <a href="#">WDPEVNC SMAQIQLCPPPPQIPNSHNMTTTLNYR</a> | Deamidated Q13, Q20, Oxidation M27; 1.21%  |
| 51.9  | 4026.8009 | 1.0172 | <a href="#">WDPEVNC SMAQIQLCPPPPQIPNSHNMTTTLNYR</a> | Deamidated N26, N32, Oxidation M9; 0.75%   |
| 46.3  | 4026.8009 | 1.0172 | <a href="#">WDPEVNC SMAQIQLCPPPPQIPNSHNMTTTLNYR</a> | Deamidated N6, N32, Oxidation M9; 0.20%    |
| 46.2  | 4026.8009 | 1.0172 | <a href="#">WDPEVNC SMAQIQLCPPPPQIPNSHNMTTTLNYR</a> | Deamidated N23, N26, Oxidation M9; 0.20%   |
| 43.0  | 4025.8168 | 2.0012 | <a href="#">WDPEVNC SMAQIQLCPPPPQIPNSHNMTTTLNYR</a> |                                            |
| 42.3  | 4026.8009 | 1.0172 | <a href="#">WDPEVNC SMAQIQLCPPPPQIPNSHNMTTTLNYR</a> | Deamidated N6, N32, Oxidation M27; 0.08%   |

Mascot: <http://www.matrixscience.com/>

# MATRIX SCIENCE Mascot Search Results

## Peptide View

MS/MS Fragmentation of **SPDVINGSPISQK**

Found in **F8WDX4** in **con\_Xuniprot\_HUMAN3**, F8WDX4\_HUMAN Complement factor H OS=Homo sapiens GN=CFH PE=2 SV=1

Match to Query 2031: 1341.682188 from(671.848370,2+) intensity(1115.4336) rtinseconds(692) scans(1476) index(1905)

Title: 111019\_Est\_ISCardio\_NMI\_YP\_G\_4Spectrum1218\_scans\_\_1476

Data file C:\\mascot\\20140703\_Tmgf\_1D\\CSV\_UseAnalysis\\MasterCSV\\All\_Glyco\\mgf\\ptm\\UC18ERLIC\_PTM\_35D.mgf

Click mouse within plot area to zoom in by factor of two about that point

Or, to Da

Label all possible matches Label matches used for scoring

Show Y-axis

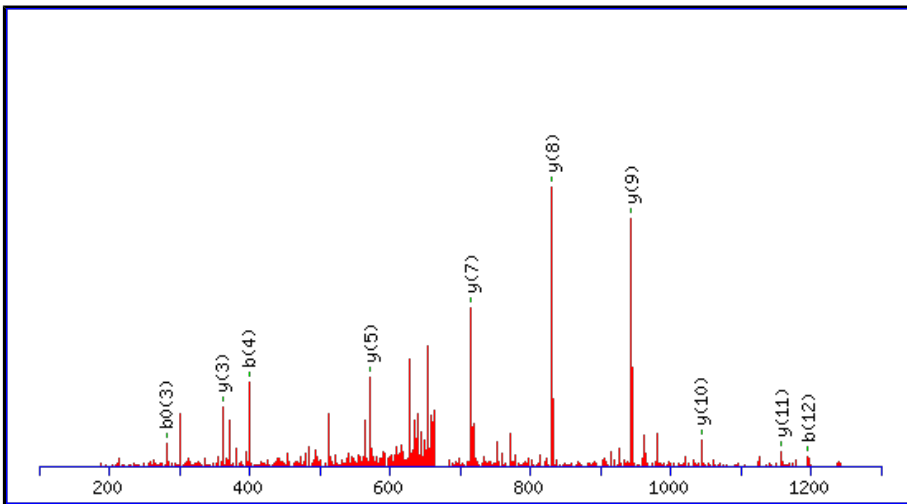

Monoisotopic mass of neutral peptide  $M_r(\text{calc})$ : 1341.6776

Fixed modifications: Carbamidomethyl (C) (apply to specified residues or termini only)

Variable modifications:

N6 : Deamidated (NQ)

Ions Score: 70 Expect: 1.7e-005

Matches : 10/130 fragment ions using 11 most intense peaks ([help](#))

| #  | b         | b <sup>++</sup> | b*        | b <sup>+++</sup> | b <sup>0</sup> | b <sup>0++</sup> | Seq. | y         | y <sup>++</sup> | y*        | y <sup>+++</sup> | y <sup>0</sup> | y <sup>0++</sup> | #  |
|----|-----------|-----------------|-----------|------------------|----------------|------------------|------|-----------|-----------------|-----------|------------------|----------------|------------------|----|
| 1  | 88.0393   | 44.5233         |           |                  | 70.0287        | 35.5180          | S    |           |                 |           |                  |                |                  | 13 |
| 2  | 185.0921  | 93.0497         |           |                  | 167.0815       | 84.0444          | P    | 1255.6529 | 628.3301        | 1238.6263 | 619.8168         | 1237.6423      | 619.3248         | 12 |
| 3  | 300.1190  | 150.5631        |           |                  | 282.1084       | 141.5579         | D    | 1158.6001 | 579.8037        | 1141.5735 | 571.2904         | 1140.5895      | 570.7984         | 11 |
| 4  | 399.1874  | 200.0974        |           |                  | 381.1769       | 191.0921         | V    | 1043.5732 | 522.2902        | 1026.5466 | 513.7769         | 1025.5626      | 513.2849         | 10 |
| 5  | 512.2715  | 256.6394        |           |                  | 494.2609       | 247.6341         | I    | 944.5047  | 472.7560        | 927.4782  | 464.2427         | 926.4942       | 463.7507         | 9  |
| 6  | 627.2984  | 314.1529        | 610.2719  | 305.6396         | 609.2879       | 305.1476         | N    | 831.4207  | 416.2140        | 814.3941  | 407.7007         | 813.4101       | 407.2087         | 8  |
| 7  | 684.3199  | 342.6636        | 667.2933  | 334.1503         | 666.3093       | 333.6583         | G    | 716.3937  | 358.7005        | 699.3672  | 350.1872         | 698.3832       | 349.6952         | 7  |
| 8  | 771.3519  | 386.1796        | 754.3254  | 377.6663         | 753.3414       | 377.1743         | S    | 659.3723  | 330.1898        | 642.3457  | 321.6765         | 641.3617       | 321.1845         | 6  |
| 9  | 868.4047  | 434.7060        | 851.3781  | 426.1927         | 850.3941       | 425.7007         | P    | 572.3402  | 286.6738        | 555.3137  | 278.1605         | 554.3297       | 277.6685         | 5  |
| 10 | 981.4888  | 491.2480        | 964.4622  | 482.7347         | 963.4782       | 482.2427         | I    | 475.2875  | 238.1474        | 458.2609  | 229.6341         | 457.2769       | 229.1421         | 4  |
| 11 | 1068.5208 | 534.7640        | 1051.4942 | 526.2508         | 1050.5102      | 525.7587         | S    | 362.2034  | 181.6053        | 345.1769  | 173.0921         | 344.1928       | 172.6001         | 3  |
| 12 | 1196.5794 | 598.7933        | 1179.5528 | 590.2800         | 1178.5688      | 589.7880         | Q    | 275.1714  | 138.0893        | 258.1448  | 129.5761         |                |                  | 2  |
| 13 |           |                 |           |                  |                |                  | K    | 147.1128  | 74.0600         | 130.0863  | 65.5468          |                |                  | 1  |

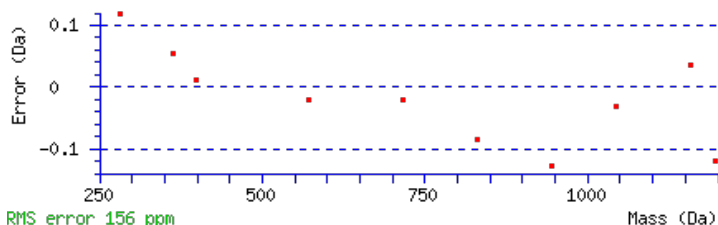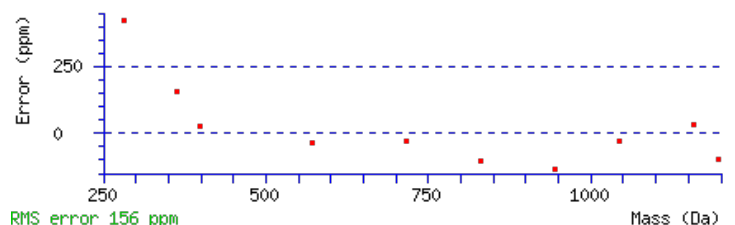

NCBI **BLAST** search of [SPDVINGSPISQK](#)

(Parameters: blastp, nr protein database, expect=20000, no filter, PAM30)

Other BLAST [web gateways](#)

**All matches to this query**

| Score | Mr(calc)  | Delta   | Sequence                      | Site Analysis         |
|-------|-----------|---------|-------------------------------|-----------------------|
| 70.4  | 1341.6776 | 0.0046  | <a href="#">SPDVINGSPISQK</a> | Deamidated N6 100.00% |
| 23.0  | 1341.6776 | 0.0046  | <a href="#">SPDVINGSPISQK</a> | Deamidated Q12 0.00%  |
| 14.4  | 1341.6776 | 0.0046  | <a href="#">TAIIDDETHSK</a>   |                       |
| 4.2   | 1341.6823 | -0.0001 | <a href="#">RVVETMHQSQK</a>   |                       |
| 3.1   | 1341.6776 | 0.0046  | <a href="#">LANQEDVSGALPK</a> |                       |
| 2.5   | 1341.6816 | 0.0006  | <a href="#">GLVEGSFOYTLK</a>  |                       |

**Mascot:** <http://www.matrixscience.com/>

# MATRIX SCIENCE Mascot Search Results

## Peptide View

MS/MS Fragmentation of **WDPEVNC SMAQIQLCPPPPQIPNSHNMTTLN YR**

Found in **P08603** in **con\_Xuniprot\_HUMAN3**, CFAH\_HUMAN Complement factor H OS=Homo sapiens GN=CFH PE=1 SV=4

Match to Query 28341: 4026.786402 from(1343.269410,3+) intensity(0.0000) rtinseconds(1852) scans(4825) index(19694)

Title: 111019\_Est\_MI\_YP\_G\_09Spectrum4256\_scans\_\_4825

Data file C:\mascot\20140703\_Tmgf\_1D\CSV\_UseAnalysis\MasterCSV\All\_Glyco\mgf\ptm\UC18ERLIC\_PTM\_35D.mgf

Click mouse within plot area to zoom in by factor of two about that point

Or, to Da

Label all possible matches Label matches used for scoring

Show Y-axis

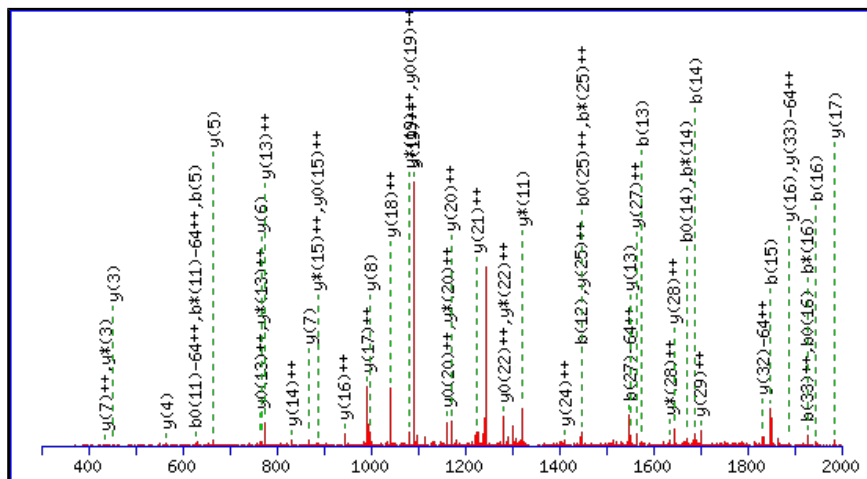

Monoisotopic mass of neutral peptide Mr(calc): 4026.8009

Fixed modifications: Carbamidomethyl (C) (apply to specified residues or termini only)

Variable modifications:

M9 : Oxidation (M), with neutral losses 0.0000 (shown in table), 63.9983

N23 : Deamidated (NQ)

N26 : Deamidated (NQ)

Ions Score: 70 Expect: 1.1e-005

Matches : 54/574 fragment ions using 85 most intense peaks ([help](#))

| #  | b                | b <sup>++</sup> | b <sup>*</sup>   | b <sup>*++</sup> | b <sup>0</sup>   | b <sup>0++</sup> | Seq. | y                | y <sup>++</sup>  | y <sup>*</sup> | y <sup>*++</sup> | y <sup>0</sup> | y <sup>0++</sup> | #  |
|----|------------------|-----------------|------------------|------------------|------------------|------------------|------|------------------|------------------|----------------|------------------|----------------|------------------|----|
| 1  | 187.0866         | 94.0469         |                  |                  |                  |                  | W    |                  |                  |                |                  |                |                  | 34 |
| 2  | 302.1135         | 151.5604        |                  |                  | 284.1030         | 142.5551         | D    | 3841.7288        | 1921.3681        | 3824.7023      | 1912.8548        | 3823.7183      | 1912.3628        | 33 |
| 3  | 399.1663         | 200.0868        |                  |                  | 381.1557         | 191.0815         | P    | 3726.7019        | 1863.8546        | 3709.6754      | 1855.3413        | 3708.6913      | 1854.8493        | 32 |
| 4  | 528.2089         | 264.6081        |                  |                  | 510.1983         | 255.6028         | E    | 3629.6491        | 1815.3282        | 3612.6226      | 1806.8149        | 3611.6386      | 1806.3229        | 31 |
| 5  | <b>627.2773</b>  | 314.1423        |                  |                  | 609.2667         | 305.1370         | V    | 3500.6065        | 1750.8069        | 3483.5800      | 1742.2936        | 3482.5960      | 1741.8016        | 30 |
| 6  | 741.3202         | 371.1638        | 724.2937         | 362.6505         | 723.3097         | 362.1585         | N    | 3401.5381        | <b>1701.2727</b> | 3384.5116      | 1692.7594        | 3383.5276      | 1692.2674        | 29 |
| 7  | 901.3509         | 451.1791        | 884.3243         | 442.6658         | 883.3403         | 442.1738         | C    | 3287.4952        | <b>1644.2512</b> | 3270.4687      | <b>1635.7380</b> | 3269.4846      | 1635.2460        | 28 |
| 8  | 988.3829         | 494.6951        | 971.3564         | 486.1818         | 970.3723         | 485.6898         | S    | 3127.4646        | <b>1564.2359</b> | 3110.4380      | 1555.7226        | 3109.4540      | 1555.2306        | 27 |
| 9  | 1135.4183        | 568.2128        | 1118.3918        | 559.6995         | 1117.4077        | 559.2075         | M    | 3040.4325        | 1520.7199        | 3023.4060      | 1512.2066        | 3022.4220      | 1511.7146        | 26 |
| 10 | 1206.4554        | 603.7313        | 1189.4289        | 595.2181         | 1188.4449        | 594.7261         | A    | 2893.3971        | <b>1447.2022</b> | 2876.3706      | 1438.6889        | 2875.3866      | 1438.1969        | 25 |
| 11 | 1334.5140        | 667.7606        | 1317.4875        | 659.2474         | 1316.5034        | 658.7554         | Q    | 2822.3600        | <b>1411.6836</b> | 2805.3335      | 1403.1704        | 2804.3494      | 1402.6784        | 24 |
| 12 | <b>1447.5981</b> | 724.3027        | 1430.5715        | 715.7894         | 1429.5875        | 715.2974         | I    | 2694.3014        | 1347.6544        | 2677.2749      | 1339.1411        | 2676.2909      | 1338.6491        | 23 |
| 13 | <b>1575.6566</b> | 788.3320        | 1558.6301        | 779.8187         | 1557.6461        | 779.3267         | Q    | 2581.2174        | 1291.1123        | 2564.1908      | <b>1282.5990</b> | 2563.2068      | <b>1282.1070</b> | 22 |
| 14 | <b>1688.7407</b> | 844.8740        | <b>1671.7142</b> | 836.3607         | <b>1670.7301</b> | 835.8687         | L    | 2453.1588        | <b>1227.0830</b> | 2436.1322      | 1218.5698        | 2435.1482      | 1218.0778        | 21 |
| 15 | <b>1848.7714</b> | 924.8893        | 1831.7448        | 916.3760         | 1830.7608        | 915.8840         | C    | 2340.0747        | <b>1170.5410</b> | 2323.0482      | <b>1162.0277</b> | 2322.0642      | <b>1161.5357</b> | 20 |
| 16 | <b>1945.8241</b> | 973.4157        | <b>1928.7976</b> | 964.9024         | <b>1927.8136</b> | 964.4104         | P    | 2180.0441        | <b>1090.5257</b> | 2163.0175      | <b>1082.0124</b> | 2162.0335      | <b>1081.5204</b> | 19 |
| 17 | 2042.8769        | 1021.9421       | 2025.8503        | 1013.4288        | 2024.8663        | 1012.9368        | P    | 2082.9913        | <b>1041.9993</b> | 2065.9648      | 1033.4860        | 2064.9808      | 1032.9940        | 18 |
| 18 | 2139.9296        | 1070.4685       | 2122.9031        | 1061.9552        | 2121.9191        | 1061.4632        | P    | <b>1985.9386</b> | <b>993.4729</b>  | 1968.9120      | 984.9596         | 1967.9280      | 984.4676         | 17 |
| 19 | 2236.9824        | 1118.9948       | 2219.9559        | 1110.4816        | 2218.9718        | 1109.9896        | P    | <b>1888.8858</b> | <b>944.9465</b>  | 1871.8592      | 936.4333         | 1870.8752      | 935.9413         | 16 |
| 20 | 2365.0410        | 1183.0241       | 2348.0144        | 1174.5109        | 2347.0304        | 1174.0188        | Q    | 1791.8330        | 896.4202         | 1774.8065      | <b>887.9069</b>  | 1773.8225      | <b>887.4149</b>  | 15 |
| 21 | 2478.1251        | 1239.5662       | 2461.0985        | 1231.0529        | 2460.1145        | 1230.5609        | I    | 1663.7744        | <b>832.3909</b>  | 1646.7479      | 823.8776         | 1645.7639      | 823.3856         | 14 |
| 22 | 2575.1778        | 1288.0925       | 2558.1513        | 1279.5793        | 2557.1673        | 1279.0873        | P    | <b>1550.6904</b> | <b>775.8488</b>  | 1533.6638      | <b>767.3356</b>  | 1532.6798      | <b>766.8435</b>  | 13 |

|    |           |           |           |           |           |           |   |           |          |           |          |           |          |    |
|----|-----------|-----------|-----------|-----------|-----------|-----------|---|-----------|----------|-----------|----------|-----------|----------|----|
| 23 | 2690.2048 | 1345.6060 | 2673.1782 | 1337.0927 | 2672.1942 | 1336.6007 | N | 1453.6376 | 727.3224 | 1436.6111 | 718.8092 | 1435.6271 | 718.3172 | 12 |
| 24 | 2777.2368 | 1389.1220 | 2760.2102 | 1380.6088 | 2759.2262 | 1380.1167 | S | 1338.6107 | 669.8090 | 1321.5841 | 661.2957 | 1320.6001 | 660.8037 | 11 |
| 25 | 2914.2957 | 1457.6515 | 2897.2691 | 1449.1382 | 2896.2851 | 1448.6462 | H | 1251.5786 | 626.2930 | 1234.5521 | 617.7797 | 1233.5681 | 617.2877 | 10 |
| 26 | 3029.3226 | 1515.1650 | 3012.2961 | 1506.6517 | 3011.3121 | 1506.1597 | N | 1114.5197 | 557.7635 | 1097.4932 | 549.2502 | 1096.5092 | 548.7582 | 9  |
| 27 | 3160.3631 | 1580.6852 | 3143.3366 | 1572.1719 | 3142.3526 | 1571.6799 | M | 999.4928  | 500.2500 | 982.4662  | 491.7368 | 981.4822  | 491.2448 | 8  |
| 28 | 3261.4108 | 1631.2090 | 3244.3843 | 1622.6958 | 3243.4002 | 1622.2038 | T | 868.4523  | 434.7298 | 851.4258  | 426.2165 | 850.4417  | 425.7245 | 7  |
| 29 | 3362.4585 | 1681.7329 | 3345.4319 | 1673.2196 | 3344.4479 | 1672.7276 | T | 767.4046  | 384.2060 | 750.3781  | 375.6927 | 749.3941  | 375.2007 | 6  |
| 30 | 3463.5062 | 1732.2567 | 3446.4796 | 1723.7434 | 3445.4956 | 1723.2514 | T | 666.3570  | 333.6821 | 649.3304  | 325.1688 | 648.3464  | 324.6768 | 5  |
| 31 | 3576.5902 | 1788.7988 | 3559.5637 | 1780.2855 | 3558.5797 | 1779.7935 | L | 565.3093  | 283.1583 | 548.2827  | 274.6450 |           |          | 4  |
| 32 | 3690.6332 | 1845.8202 | 3673.6066 | 1837.3069 | 3672.6226 | 1836.8149 | N | 452.2252  | 226.6162 | 435.1987  | 218.1030 |           |          | 3  |
| 33 | 3853.6965 | 1927.3519 | 3836.6699 | 1918.8386 | 3835.6859 | 1918.3466 | Y | 338.1823  | 169.5948 | 321.1557  | 161.0815 |           |          | 2  |
| 34 |           |           |           |           |           |           | R | 175.1190  | 88.0631  | 158.0924  | 79.5498  |           |          | 1  |

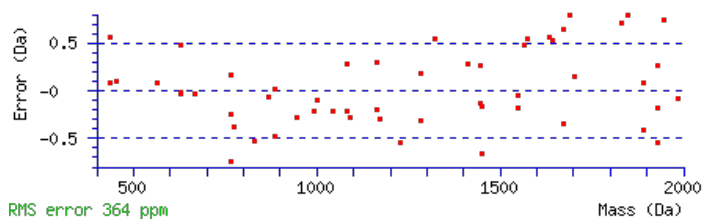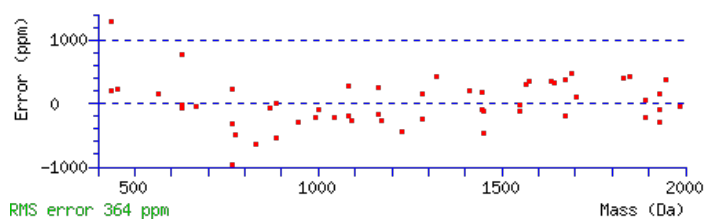

NCBI BLAST search of [WDPEVNC SMAQIQLCPPPPQIPNSHNMTTTLNYR](#)

(Parameters: blastp, nr protein database, expect=20000, no filter, PAM30)

Other BLAST [web gateways](#)

All matches to this query

| Score | Mr(calc)  | Delta   | Sequence                                            | Site Analysis                             |
|-------|-----------|---------|-----------------------------------------------------|-------------------------------------------|
| 69.8  | 4026.8009 | -0.0145 | <a href="#">WDPEVNC SMAQIQLCPPPPQIPNSHNMTTTLNYR</a> | Deamidated N23, N26, Oxidation M9; 33.54% |
| 69.8  | 4026.8009 | -0.0145 | <a href="#">WDPEVNC SMAQIQLCPPPPQIPNSHNMTTTLNYR</a> | Deamidated N26, N32, Oxidation M9; 32.86% |
| 68.6  | 4026.8009 | -0.0145 | <a href="#">WDPEVNC SMAQIQLCPPPPQIPNSHNMTTTLNYR</a> | Deamidated Q20, N23, Oxidation M9; 25.10% |
| 62.8  | 4026.8009 | -0.0145 | <a href="#">WDPEVNC SMAQIQLCPPPPQIPNSHNMTTTLNYR</a> | Deamidated Q13, Q20, Oxidation M9; 6.62%  |
| 54.5  | 4026.8009 | -0.0145 | <a href="#">WDPEVNC SMAQIQLCPPPPQIPNSHNMTTTLNYR</a> | Deamidated Q11, Q13, Oxidation M9; 0.99%  |
| 53.5  | 4026.8009 | -0.0145 | <a href="#">WDPEVNC SMAQIQLCPPPPQIPNSHNMTTTLNYR</a> | Deamidated N6, N32, Oxidation M9; 0.78%   |
| 45.3  | 4026.8009 | -0.0145 | <a href="#">WDPEVNC SMAQIQLCPPPPQIPNSHNMTTTLNYR</a> | Deamidated N6, Q11, Oxidation M9; 0.12%   |
| 10.4  | 4026.8009 | -0.0145 | <a href="#">WDPEVNC SMAQIQLCPPPPQIPNSHNMTTTLNYR</a> | Deamidated N23, N26, Oxidation M27; 0.00% |
| 9.8   | 4026.8009 | -0.0145 | <a href="#">WDPEVNC SMAQIQLCPPPPQIPNSHNMTTTLNYR</a> | Deamidated Q13, Q20, Oxidation M27; 0.00% |
| 9.5   | 4026.8009 | -0.0145 | <a href="#">WDPEVNC SMAQIQLCPPPPQIPNSHNMTTTLNYR</a> | Deamidated Q20, N23, Oxidation M27; 0.00% |

Mascot: <http://www.matrixscience.com/>

# MATRIX SCIENCE Mascot Search Results

## Peptide View

MS/MS Fragmentation of **AGEQVITYTCATYYKMDGASNVTICNSR**

Found in **P08603** in **con\_Xuniprot\_HUMAN3**, CFAH\_HUMAN Complement factor H OS=Homo sapiens GN=CFH PE=1 SV=4

Match to Query 27293: 3060.335022 from(1021.118950,3+) intensity(20258.6289) rtinseconds(1322) scans(3219) index(22543)

Title: 111019\_Est\_ML\_YS\_G\_03Spectrum2790\_scans\_\_3219

Data file C:\mascot\20140703\_Tmgf\_1D\CSV\_UseAnalysis\MasterCSV\All\_Glyco\mgf\ptm\UC18ERLIC\_PTM\_35D.mgf

Click mouse within plot area to zoom in by factor of two about that point

Or, to Da

Label all possible matches Label matches used for scoring

Show Y-axis

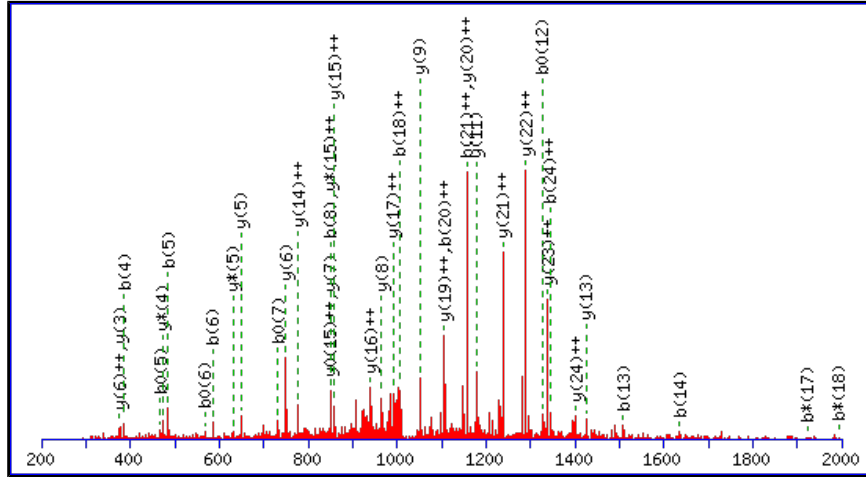

Monoisotopic mass of neutral peptide Mr(calc): 3060.3263

Fixed modifications: Carbamidomethyl (C) (apply to specified residues or termini only)

Variable modifications:

N20 : Deamidated (NQ)

Ions Score: 62 Expect: 6.2e-005

Matches : 39/300 fragment ions using 69 most intense peaks ([help](#))

| #  | b                | b <sup>++</sup>  | b <sup>*</sup>   | b <sup>*++</sup> | b <sup>0</sup>   | b <sup>0++</sup> | Seq. | y                | y <sup>++</sup>  | y <sup>*</sup>  | y <sup>*++</sup> | y <sup>0</sup> | y <sup>0++</sup> | #  |
|----|------------------|------------------|------------------|------------------|------------------|------------------|------|------------------|------------------|-----------------|------------------|----------------|------------------|----|
| 1  | 72.0444          | 36.5258          |                  |                  |                  |                  | A    |                  |                  |                 |                  |                |                  | 27 |
| 2  | 129.0659         | 65.0366          |                  |                  |                  |                  | G    | 2990.2965        | 1495.6519        | 2973.2699       | 1487.1386        | 2972.2859      | 1486.6466        | 26 |
| 3  | 258.1084         | 129.5579         |                  |                  | 240.0979         | 120.5526         | E    | 2933.2750        | 1467.1412        | 2916.2485       | 1458.6279        | 2915.2645      | 1458.1359        | 25 |
| 4  | <b>386.1670</b>  | 193.5872         | 369.1405         | 185.0739         | 368.1565         | 184.5819         | Q    | 2804.2324        | <b>1402.6199</b> | 2787.2059       | 1394.1066        | 2786.2219      | 1393.6146        | 24 |
| 5  | <b>485.2354</b>  | 243.1214         | 468.2089         | 234.6081         | <b>467.2249</b>  | 234.1161         | V    | 2676.1739        | <b>1338.5906</b> | 2659.1473       | 1330.0773        | 2658.1633      | 1329.5853        | 23 |
| 6  | <b>586.2831</b>  | 293.6452         | 569.2566         | 285.1319         | <b>568.2726</b>  | 284.6399         | T    | 2577.1054        | <b>1289.0564</b> | 2560.0789       | 1280.5431        | 2559.0949      | 1280.0511        | 22 |
| 7  | 749.3464         | 375.1769         | 732.3199         | 366.6636         | <b>731.3359</b>  | 366.1716         | Y    | 2476.0578        | <b>1238.5325</b> | 2459.0312       | 1230.0192        | 2458.0472      | 1229.5272        | 21 |
| 8  | <b>850.3941</b>  | 425.7007         | 833.3676         | 417.1874         | 832.3836         | 416.6954         | T    | 2312.9944        | <b>1157.0009</b> | 2295.9679       | 1148.4876        | 2294.9839      | 1147.9956        | 20 |
| 9  | 1010.4248        | 505.7160         | 993.3982         | 497.2028         | 992.4142         | 496.7107         | C    | 2211.9468        | <b>1106.4770</b> | 2194.9202       | 1097.9637        | 2193.9362      | 1097.4717        | 19 |
| 10 | 1081.4619        | 541.2346         | 1064.4353        | 532.7213         | 1063.4513        | 532.2293         | A    | 2051.9161        | 1026.4617        | 2034.8896       | 1017.9484        | 2033.9055      | 1017.4564        | 18 |
| 11 | 1182.5096        | 591.7584         | 1165.4830        | 583.2451         | 1164.4990        | 582.7531         | T    | 1980.8790        | <b>990.9431</b>  | 1963.8524       | 982.4299         | 1962.8684      | 981.9379         | 17 |
| 12 | 1345.5729        | 673.2901         | 1328.5463        | 664.7768         | <b>1327.5623</b> | 664.2848         | Y    | 1879.8313        | <b>940.4193</b>  | 1862.8048       | 931.9060         | 1861.8207      | 931.4140         | 16 |
| 13 | <b>1508.6362</b> | 754.8218         | 1491.6097        | 746.3085         | 1490.6257        | 745.8165         | Y    | 1716.7680        | <b>858.8876</b>  | 1699.7414       | <b>850.3744</b>  | 1698.7574      | <b>849.8823</b>  | 15 |
| 14 | <b>1636.7312</b> | 818.8692         | 1619.7046        | 810.3560         | 1618.7206        | 809.8640         | K    | 1553.7047        | <b>777.3560</b>  | 1536.6781       | 768.8427         | 1535.6941      | 768.3507         | 14 |
| 15 | 1767.7717        | 884.3895         | 1750.7451        | 875.8762         | 1749.7611        | 875.3842         | M    | <b>1425.6097</b> | 713.3085         | 1408.5831       | 704.7952         | 1407.5991      | 704.3032         | 13 |
| 16 | 1882.7986        | 941.9029         | 1865.7721        | 933.3897         | 1864.7881        | 932.8977         | D    | 1294.5692        | 647.7882         | 1277.5427       | 639.2750         | 1276.5586      | 638.7830         | 12 |
| 17 | 1939.8201        | 970.4137         | <b>1922.7935</b> | 961.9004         | 1921.8095        | 961.4084         | G    | <b>1179.5423</b> | 590.2748         | 1162.5157       | 581.7615         | 1161.5317      | 581.2695         | 11 |
| 18 | 2010.8572        | <b>1005.9322</b> | <b>1993.8306</b> | 997.4190         | 1992.8466        | 996.9270         | A    | 1122.5208        | 561.7640         | 1105.4942       | 553.2508         | 1104.5102      | 552.7588         | 10 |
| 19 | 2097.8892        | 1049.4482        | 2080.8627        | 1040.9350        | 2079.8787        | 1040.4430        | S    | <b>1051.4837</b> | 526.2455         | 1034.4571       | 517.7322         | 1033.4731      | 517.2402         | 9  |
| 20 | 2212.9162        | <b>1106.9617</b> | 2195.8896        | 1098.4484        | 2194.9056        | 1097.9564        | N    | <b>964.4517</b>  | 482.7295         | 947.4251        | 474.2162         | 946.4411       | 473.7242         | 8  |
| 21 | 2311.9846        | <b>1156.4959</b> | 2294.9580        | 1147.9827        | 2293.9740        | 1147.4906        | V    | <b>849.4247</b>  | 425.2160         | 832.3982        | 416.7027         | 831.4141       | 416.2107         | 7  |
| 22 | 2413.0323        | 1207.0198        | 2396.0057        | 1198.5065        | 2395.0217        | 1198.0145        | T    | <b>750.3563</b>  | <b>375.6818</b>  | 733.3297        | 367.1685         | 732.3457       | 366.6765         | 6  |
| 23 | 2573.0629        | 1287.0351        | 2556.0364        | 1278.5218        | 2555.0523        | 1278.0298        | C    | <b>649.3086</b>  | 325.1579         | <b>632.2821</b> | 316.6447         | 631.2981       | 316.1527         | 5  |

|    |           |                  |           |           |           |           |   |                 |          |                 |          |          |          |   |
|----|-----------|------------------|-----------|-----------|-----------|-----------|---|-----------------|----------|-----------------|----------|----------|----------|---|
| 24 | 2686.1470 | <b>1343.5771</b> | 2669.1204 | 1335.0638 | 2668.1364 | 1334.5718 | I | 489.2780        | 245.1426 | <b>472.2514</b> | 236.6293 | 471.2674 | 236.1373 | 4 |
| 25 | 2800.1899 | 1400.5986        | 2783.1633 | 1392.0853 | 2782.1793 | 1391.5933 | N | <b>376.1939</b> | 188.6006 | 359.1674        | 180.0873 | 358.1833 | 179.5953 | 3 |
| 26 | 2887.2219 | 1444.1146        | 2870.1954 | 1435.6013 | 2869.2114 | 1435.1093 | S | 262.1510        | 131.5791 | 245.1244        | 123.0659 | 244.1404 | 122.5738 | 2 |
| 27 |           |                  |           |           |           |           | R | 175.1190        | 88.0631  | 158.0924        | 79.5498  |          |          | 1 |

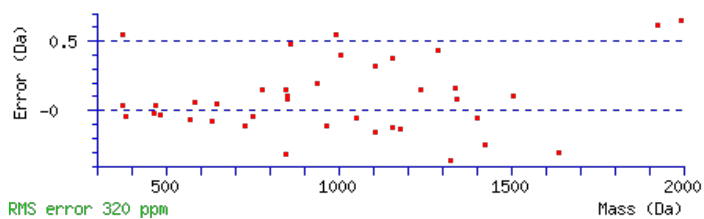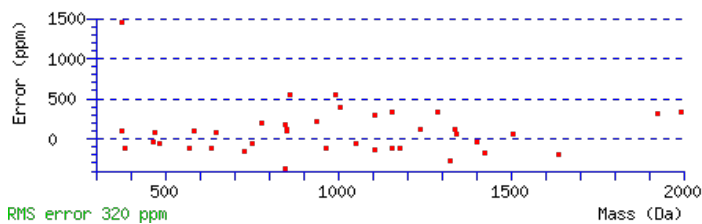

NCBI **BLAST** search of [AGEQVITYTCATYYKMDGASNVTCINSR](#)  
 (Parameters: blastp, nr protein database, expect=20000, no filter, PAM30)  
 Other BLAST [web gateways](#)

**All matches to this query**

| Score | Mr(calc)  | Delta   | Sequence                                     | Site Analysis         |
|-------|-----------|---------|----------------------------------------------|-----------------------|
| 61.7  | 3060.3263 | 0.0087  | <a href="#">AGEQVITYTCATYYKMDGASNVTCINSR</a> | Deamidated N20 76.33% |
| 56.6  | 3060.3263 | 0.0087  | <a href="#">AGEQVITYTCATYYKMDGASNVTCINSR</a> | Deamidated N25 23.64% |
| 30.6  | 3059.3423 | 0.9927  | <a href="#">AGEQVITYTCATYYKMDGASNVTCINSR</a> |                       |
| 28.1  | 3060.3263 | 0.0087  | <a href="#">AGEQVITYTCATYYKMDGASNVTCINSR</a> | Deamidated Q4 0.03%   |
| 5.5   | 3060.3353 | -0.0003 | <a href="#">QMANSYSINSSSQQLTNDALVGLNK</a>    |                       |
| 3.0   | 3060.3492 | -0.0142 | <a href="#">MESQEPTSSQNGKQYIISEELISEGK</a>   |                       |
| 0.4   | 3060.3310 | 0.0040  | <a href="#">MLKEGHSMVQGAEMSVNQLYNHCR</a>     |                       |
| 0.3   | 3060.3310 | 0.0040  | <a href="#">MLKEGHSMVQGAEMSVNQLYNHCR</a>     |                       |

Mascot: <http://www.matrixscience.com/>



# MASCOT SCIENCE Mascot Search Results

## Peptide View

MS/MS Fragmentation of **WQSIPLCVEKIPCSQPPQIEHGTINSSR**

Found in **P08603** in **con\_Xuniprot\_HUMAN3**, CFAH\_HUMAN Complement factor H OS=Homo sapiens GN=CFH PE=1 SV=4

Match to Query 27388: 3261.598242 from(1088.206690,3+) intensity(35745.0547) rtinseconds(1535) scans(3711) index(8325)

Title: 111019\_Est\_ISCardio\_NMI\_YS\_G\_3Spectrum3164\_scans\_\_3711

Data file C:\mascot\20140703\_Tmgf\_1D\CSV\_UseAnalysis\MasterCSV\All\_Glyco\mgf\ptm\UC18ERLIC\_PTM\_35D.mgf

Click mouse within plot area to zoom in by factor of two about that point

Or, to Da

Label all possible matches Label matches used for scoring

Show Y-axis

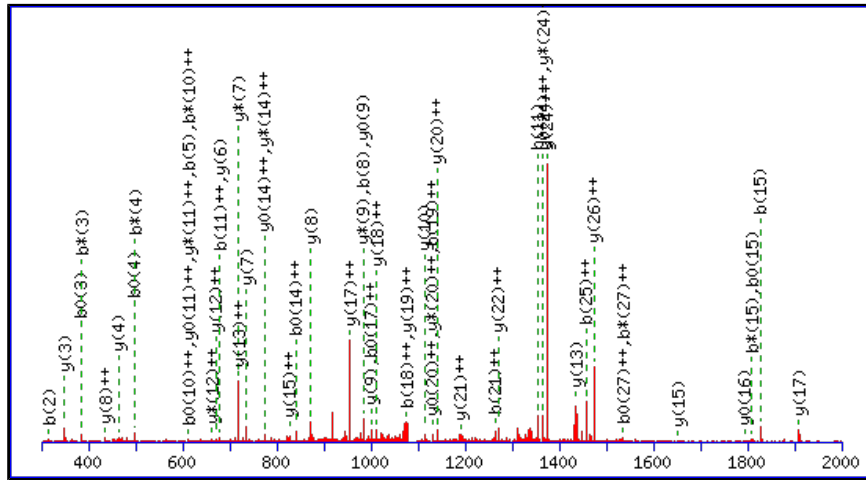

Monoisotopic mass of neutral peptide Mr(calc): 3261.5910

Fixed modifications: Carbamidomethyl (C) (apply to specified residues or termini only)

Variable modifications:

N25 : Deamidated (NQ)

Ions Score: 58 Expect: 0.00046

Matches : 57/316 fragment ions using 85 most intense peaks ([help](#))

| #  | b                | b <sup>++</sup>  | b <sup>*</sup>   | b <sup>*++</sup> | b <sup>0</sup>   | b <sup>0++</sup> | Seq. | y                | y <sup>++</sup>  | y <sup>*</sup>  | y <sup>*++</sup> | y <sup>0</sup>   | y <sup>0++</sup> | #  |
|----|------------------|------------------|------------------|------------------|------------------|------------------|------|------------------|------------------|-----------------|------------------|------------------|------------------|----|
| 1  | 187.0866         | 94.0469          |                  |                  |                  |                  | W    |                  |                  |                 |                  |                  |                  | 28 |
| 2  | <b>315.1452</b>  | 158.0762         | 298.1186         | 149.5629         |                  |                  | Q    | 3076.5190        | 1538.7632        | 3059.4925       | 1530.2499        | 3058.5085        | 1529.7579        | 27 |
| 3  | 402.1772         | 201.5922         | <b>385.1506</b>  | 193.0790         | <b>384.1666</b>  | 192.5870         | S    | 2948.4605        | <b>1474.7339</b> | 2931.4339       | 1466.2206        | 2930.4499        | 1465.7286        | 26 |
| 4  | 515.2613         | 258.1343         | <b>498.2347</b>  | 249.6210         | <b>497.2507</b>  | 249.1290         | I    | 2861.4284        | 1431.2179        | 2844.4019       | 1422.7046        | 2843.4179        | 1422.2126        | 25 |
| 5  | <b>612.3140</b>  | 306.6606         | 595.2875         | 298.1474         | 594.3035         | 297.6554         | P    | 2748.3444        | <b>1374.6758</b> | 2731.3178       | <b>1366.1625</b> | 2730.3338        | <b>1365.6705</b> | 24 |
| 6  | 725.3981         | 363.2027         | 708.3715         | 354.6894         | 707.3875         | 354.1974         | L    | 2651.2916        | 1326.1494        | 2634.2650       | 1317.6362        | 2633.2810        | 1317.1442        | 23 |
| 7  | 885.4287         | 443.2180         | 868.4022         | 434.7047         | 867.4182         | 434.2127         | C    | 2538.2075        | <b>1269.6074</b> | 2521.1810       | 1261.0941        | 2520.1970        | 1260.6021        | 22 |
| 8  | <b>984.4972</b>  | 492.7522         | 967.4706         | 484.2389         | 966.4866         | 483.7469         | V    | 2378.1769        | <b>1189.5921</b> | 2361.1503       | 1181.0788        | 2360.1663        | 1180.5868        | 21 |
| 9  | 1113.5397        | 557.2735         | 1096.5132        | 548.7602         | 1095.5292        | 548.2682         | E    | 2279.1085        | <b>1140.0579</b> | 2262.0819       | <b>1131.5446</b> | 2261.0979        | <b>1131.0526</b> | 20 |
| 10 | 1241.6347        | 621.3210         | 1224.6082        | <b>612.8077</b>  | 1223.6241        | <b>612.3157</b>  | K    | 2150.0659        | <b>1075.5366</b> | 2133.0393       | 1067.0233        | 2132.0553        | 1066.5313        | 19 |
| 11 | <b>1354.7188</b> | <b>677.8630</b>  | 1337.6922        | 669.3497         | 1336.7082        | 668.8577         | I    | 2021.9709        | <b>1011.4891</b> | 2004.9444       | 1002.9758        | 2003.9604        | 1002.4838        | 18 |
| 12 | 1451.7715        | 726.3894         | 1434.7450        | 717.8761         | 1433.7610        | 717.3841         | P    | <b>1908.8869</b> | <b>954.9471</b>  | 1891.8603       | 946.4338         | 1890.8763        | 945.9418         | 17 |
| 13 | 1611.8022        | 806.4047         | 1594.7756        | 797.8915         | 1593.7916        | 797.3994         | C    | 1811.8341        | 906.4207         | 1794.8075       | 897.9074         | <b>1793.8235</b> | 897.4154         | 16 |
| 14 | 1698.8342        | 849.9207         | 1681.8077        | 841.4075         | 1680.8236        | <b>840.9155</b>  | S    | <b>1651.8034</b> | <b>826.4054</b>  | 1634.7769       | 817.8921         | 1633.7929        | 817.4001         | 15 |
| 15 | <b>1826.8928</b> | 913.9500         | <b>1809.8662</b> | 905.4368         | <b>1808.8822</b> | 904.9448         | Q    | 1564.7714        | 782.8893         | 1547.7449       | <b>774.3761</b>  | 1546.7608        | <b>773.8841</b>  | 14 |
| 16 | 1923.9456        | 962.4764         | 1906.9190        | 953.9631         | 1905.9350        | 953.4711         | P    | <b>1436.7128</b> | <b>718.8601</b>  | 1419.6863       | 710.3468         | 1418.7023        | 709.8548         | 13 |
| 17 | 2020.9983        | 1011.0028        | 2003.9718        | 1002.4895        | 2002.9878        | <b>1001.9975</b> | P    | 1339.6601        | <b>670.3337</b>  | 1322.6335       | <b>661.8204</b>  | 1321.6495        | 661.3284         | 12 |
| 18 | 2149.0569        | <b>1075.0321</b> | 2132.0303        | 1066.5188        | 2131.0463        | 1066.0268        | Q    | 1242.6073        | 621.8073         | 1225.5808       | <b>613.2940</b>  | 1224.5967        | <b>612.8020</b>  | 11 |
| 19 | 2262.1410        | <b>1131.5741</b> | 2245.1144        | 1123.0608        | 2244.1304        | 1122.5688        | I    | <b>1114.5487</b> | 557.7780         | 1097.5222       | 549.2647         | 1096.5382        | 548.7727         | 10 |
| 20 | 2391.1836        | 1196.0954        | 2374.1570        | 1187.5821        | 2373.1730        | 1187.0901        | E    | <b>1001.4647</b> | 501.2360         | <b>984.4381</b> | 492.7227         | <b>983.4541</b>  | 492.2307         | 9  |
| 21 | 2528.2425        | <b>1264.6249</b> | 2511.2159        | 1256.1116        | 2510.2319        | 1255.6196        | H    | <b>872.4221</b>  | <b>436.7147</b>  | 855.3955        | 428.2014         | 854.4115         | 427.7094         | 8  |
| 22 | 2585.2639        | 1293.1356        | 2568.2374        | 1284.6223        | 2567.2534        | 1284.1303        | G    | <b>735.3632</b>  | 368.1852         | <b>718.3366</b> | 359.6719         | 717.3526         | 359.1799         | 7  |
| 23 | 2686.3116        | 1343.6594        | 2669.2851        | 1335.1462        | 2668.3010        | 1334.6542        | T    | <b>678.3417</b>  | 339.6745         | 661.3151        | 331.1612         | 660.3311         | 330.6692         | 6  |

|    |           |           |           |           |           |           |   |          |          |          |          |          |          |   |
|----|-----------|-----------|-----------|-----------|-----------|-----------|---|----------|----------|----------|----------|----------|----------|---|
| 24 | 2799.3957 | 1400.2015 | 2782.3691 | 1391.6882 | 2781.3851 | 1391.1962 | I | 577.2940 | 289.1506 | 560.2675 | 280.6374 | 559.2835 | 280.1454 | 5 |
| 25 | 2914.4226 | 1457.7149 | 2897.3961 | 1449.2017 | 2896.4120 | 1448.7097 | N | 464.2100 | 232.6086 | 447.1834 | 224.0953 | 446.1994 | 223.6033 | 4 |
| 26 | 3001.4546 | 1501.2310 | 2984.4281 | 1492.7177 | 2983.4441 | 1492.2257 | S | 349.1830 | 175.0951 | 332.1565 | 166.5819 | 331.1724 | 166.0899 | 3 |
| 27 | 3088.4867 | 1544.7470 | 3071.4601 | 1536.2337 | 3070.4761 | 1535.7417 | S | 262.1510 | 131.5791 | 245.1244 | 123.0659 | 244.1404 | 122.5738 | 2 |
| 28 |           |           |           |           |           |           | R | 175.1190 | 88.0631  | 158.0924 | 79.5498  |          |          | 1 |

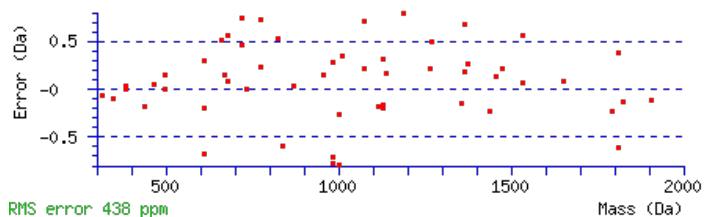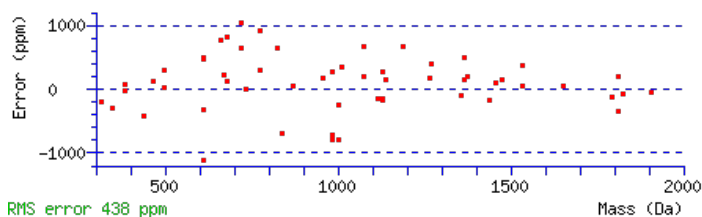

NCBI BLAST search of [WQSIPLCVEKIPCSQPPQIEHGTINSSR](#)  
 (Parameters: blastp, nr protein database, expect=20000, no filter, PAM30)  
 Other BLAST [web gateways](#)

All matches to this query

| Score | Mr(calc)  | Delta   | Sequence                                      | Site Analysis         |
|-------|-----------|---------|-----------------------------------------------|-----------------------|
| 57.6  | 3261.5910 | 0.0072  | <a href="#">WQSIPLCVEKIPCSQPPQIEHGTINSSR</a>  | Deamidated N25 91.91% |
| 45.0  | 3261.5910 | 0.0072  | <a href="#">WQSIPLCVEKIPCSQPPQIEHGTINSSR</a>  | Deamidated Q18 5.10%  |
| 42.7  | 3261.5910 | 0.0072  | <a href="#">WQSIPLCVEKIPCSQPPQIEHGTINSSR</a>  | Deamidated Q15 2.95%  |
| 24.2  | 3261.5910 | 0.0072  | <a href="#">WQSIPLCVEKIPCSQPPQIEHGTINSSR</a>  | Deamidated Q2 0.04%   |
| 23.0  | 3260.6070 | 0.9912  | <a href="#">WQSIPLCVEKIPCSQPPQIEHGTINSSR</a>  |                       |
| 4.4   | 3260.5967 | 1.0015  | <a href="#">QAIHWMHVDVPVAQPKDLAMLCICDAVK</a>  |                       |
| 4.2   | 3261.6034 | -0.0052 | <a href="#">KEGEAELLQSKQLTTVNEVLAMNNGGETK</a> |                       |
| 3.7   | 3260.5936 | 1.0047  | <a href="#">YKSAENIIQRTSDEDTTVSDLLAQYTSK</a>  |                       |
| 3.7   | 3260.5936 | 1.0047  | <a href="#">YKSAENIIQRTSDEDTTVSDLLAQYTSK</a>  |                       |
| 3.6   | 3261.6056 | -0.0073 | <a href="#">FIIENNOFLLESMDPNEWNLWLPRK</a>     |                       |

Mascot: <http://www.matrixscience.com/>

# MASCOT SCIENCE Mascot Search Results

## Peptide View

MS/MS Fragmentation of **IPCSQPPQIEHGTINSSR**

Found in **P08603** in **con\_Xuniprot\_HUMAN3**, CFAH\_HUMAN Complement factor H OS=Homo sapiens GN=CFH PE=1 SV=4

Match to Query 12586: 2021.948802 from(674.990210,3+) intensity(459632.1875) rtinseconds(645) scans(1379) index(2498)

Title: 111019\_Est\_ISCardio\_NMI\_YP\_G\_5Spectrum1161\_scans\_\_1379

Data file C:\\mascot\\20140703\_Tmgf\_1D\\CSV\_UseAnalysis\\MasterCSV\\All\_Glyco\\mgf\\ptm\\UC18ERLIC\_PTM\_35D.mgf

Click mouse within plot area to zoom in by factor of two about that point

Or, to Da

Label all possible matches Label matches used for scoring

Show Y-axis

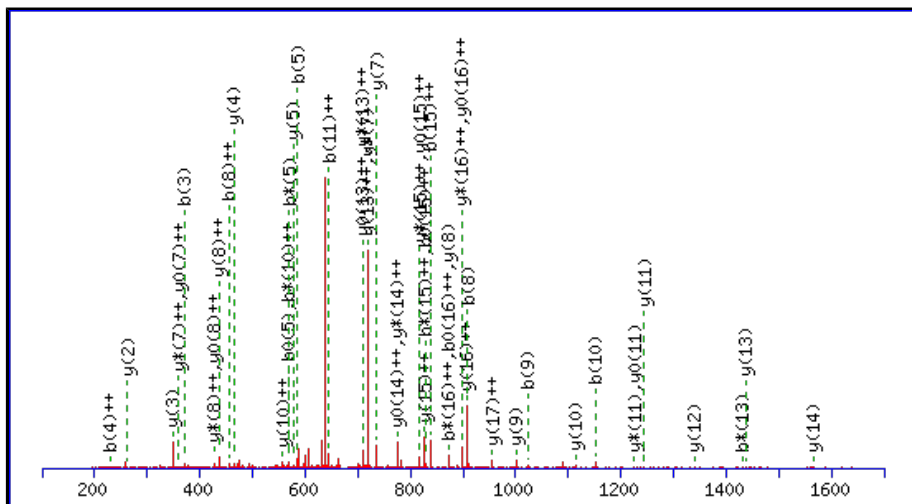

Monoisotopic mass of neutral peptide Mr(calc): 2021.9476

Fixed modifications: Carbamidomethyl (C) (apply to specified residues or termini only)

Variable modifications:

Q8 : Deamidated (NQ)

N15 : Deamidated (NQ)

Ions Score: 52 Expect: 0.0013

Matches : 50/188 fragment ions using 98 most intense peaks ([help](#))

| #  | b                | b <sup>++</sup> | b*               | b <sup>*++</sup> | b <sup>0</sup>  | b <sup>0++</sup> | Seq. | y                | y <sup>++</sup> | y*               | y <sup>*++</sup> | y <sup>0</sup>   | y <sup>0++</sup> | #  |
|----|------------------|-----------------|------------------|------------------|-----------------|------------------|------|------------------|-----------------|------------------|------------------|------------------|------------------|----|
| 1  | 114.0913         | 57.5493         |                  |                  |                 |                  | I    |                  |                 |                  |                  |                  |                  | 18 |
| 2  | 211.1441         | 106.0757        |                  |                  |                 |                  | P    | 1909.8709        | 955.4391        | 1892.8443        | 946.9258         | 1891.8603        | 946.4338         | 17 |
| 3  | <b>371.1748</b>  | 186.0910        |                  |                  |                 |                  | C    | 1812.8181        | 906.9127        | 1795.7916        | 898.3994         | 1794.8075        | 897.9074         | 16 |
| 4  | 458.2068         | <b>229.6070</b> |                  |                  | 440.1962        | 220.6017         | S    | 1652.7875        | 826.8974        | 1635.7609        | 818.3841         | 1634.7769        | 817.8921         | 15 |
| 5  | <b>586.2654</b>  | 293.6363        | <b>569.2388</b>  | 285.1230         | <b>568.2548</b> | 284.6310         | Q    | <b>1565.7554</b> | 783.3814        | 1548.7289        | <b>774.8681</b>  | 1547.7449        | <b>774.3761</b>  | 14 |
| 6  | 683.3181         | 342.1627        | 666.2916         | 333.6494         | 665.3076        | 333.1574         | P    | <b>1437.6968</b> | <b>719.3521</b> | 1420.6703        | <b>710.8388</b>  | 1419.6863        | <b>710.3468</b>  | 13 |
| 7  | 780.3709         | 390.6891        | 763.3443         | 382.1758         | 762.3603        | 381.6838         | P    | <b>1340.6441</b> | 670.8257        | 1323.6175        | 662.3124         | 1322.6335        | 661.8204         | 12 |
| 8  | <b>909.4135</b>  | <b>455.2104</b> | 892.3869         | 446.6971         | 891.4029        | 446.2051         | Q    | <b>1243.5913</b> | 622.2993        | <b>1226.5648</b> | 613.7860         | <b>1225.5808</b> | 613.2940         | 11 |
| 9  | <b>1022.4975</b> | 511.7524        | 1005.4710        | 503.2391         | 1004.4870       | 502.7471         | I    | <b>1114.5487</b> | <b>557.7780</b> | 1097.5222        | 549.2647         | 1096.5382        | 548.7727         | 10 |
| 10 | <b>1151.5401</b> | 576.2737        | 1134.5136        | <b>567.7604</b>  | 1133.5296       | 567.2684         | E    | <b>1001.4647</b> | 501.2360        | 984.4381         | 492.7227         | 983.4541         | 492.2307         | 9  |
| 11 | 1288.5991        | <b>644.8032</b> | 1271.5725        | 636.2899         | 1270.5885       | 635.7979         | H    | <b>872.4221</b>  | <b>436.7147</b> | 855.3955         | <b>428.2014</b>  | 854.4115         | <b>427.7094</b>  | 8  |
| 12 | 1345.6205        | 673.3139        | 1328.5940        | 664.8006         | 1327.6099       | 664.3086         | G    | <b>735.3632</b>  | 368.1852        | <b>718.3366</b>  | <b>359.6719</b>  | 717.3526         | <b>359.1799</b>  | 7  |
| 13 | 1446.6682        | 723.8377        | <b>1429.6416</b> | 715.3245         | 1428.6576       | 714.8325         | T    | 678.3417         | 339.6745        | 661.3151         | 331.1612         | 660.3311         | 330.6692         | 6  |
| 14 | 1559.7523        | 780.3798        | 1542.7257        | 771.8665         | 1541.7417       | 771.3745         | I    | <b>577.2940</b>  | 289.1506        | 560.2675         | 280.6374         | 559.2835         | 280.1454         | 5  |
| 15 | 1674.7792        | <b>837.8932</b> | 1657.7527        | <b>829.3800</b>  | 1656.7686       | <b>828.8880</b>  | N    | <b>464.2100</b>  | 232.6086        | 447.1834         | 224.0953         | 446.1994         | 223.6033         | 4  |
| 16 | 1761.8112        | 881.4093        | 1744.7847        | <b>872.8960</b>  | 1743.8007       | <b>872.4040</b>  | S    | <b>349.1830</b>  | 175.0951        | 332.1565         | 166.5819         | 331.1724         | 166.0899         | 3  |
| 17 | 1848.8433        | 924.9253        | 1831.8167        | 916.4120         | 1830.8327       | 915.9200         | S    | <b>262.1510</b>  | 131.5791        | 245.1244         | 123.0659         | 244.1404         | 122.5738         | 2  |
| 18 |                  |                 |                  |                  |                 |                  | R    | 175.1190         | 88.0631         | 158.0924         | 79.5498          |                  |                  | 1  |

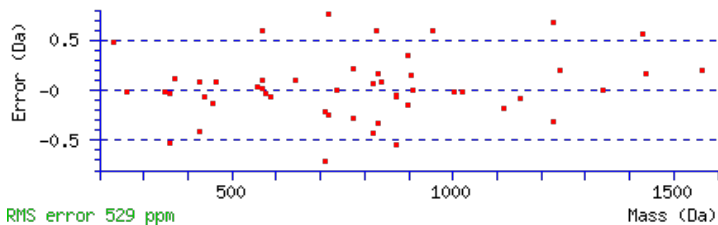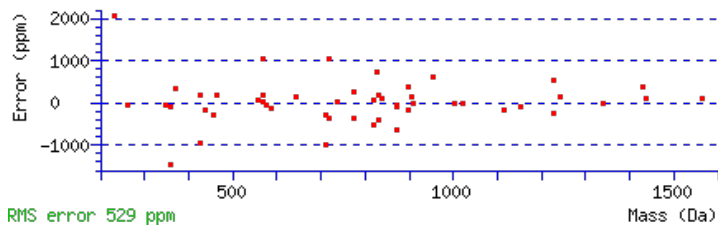

NCBI BLAST search of [IPCSQPPQIEHGTINSSR](#)

(Parameters: blastp, nr protein database, expect=20000, no filter, PAM30)

Other BLAST [web gateways](#)

**All matches to this query**

| Score | Mr(calc)  | Delta   | Sequence                           | Site Analysis             |
|-------|-----------|---------|------------------------------------|---------------------------|
| 52.4  | 2021.9476 | 0.0012  | <a href="#">IPCSQPPQIEHGTINSSR</a> | Deamidated Q8, N15 88.00% |
| 43.6  | 2021.9476 | 0.0012  | <a href="#">IPCSQPPQIEHGTINSSR</a> | Deamidated Q5, N15 11.73% |
| 27.3  | 2021.9476 | 0.0012  | <a href="#">IPCSQPPQIEHGTINSSR</a> | Deamidated Q5, Q8 0.27%   |
| 7.8   | 2021.9516 | -0.0028 | <a href="#">EENSAIIQSWYRMHK</a>    |                           |
| 7.5   | 2021.9584 | -0.0096 | <a href="#">MCPAMNLGLVGQQLATR</a>  |                           |
| 3.4   | 2021.9438 | 0.0050  | <a href="#">ADASHFIEATDMVLLMNK</a> |                           |
| 2.9   | 2019.9473 | 2.0015  | <a href="#">VYDNYSGNLFDVRRVGM</a>  |                           |
| 2.9   | 2020.9537 | 0.9951  | <a href="#">QGNHIRYSCRYDDPLK</a>   |                           |
| 2.4   | 2020.9445 | 1.0043  | <a href="#">QLLVEVERMECATPSDK</a>  |                           |
| 2.3   | 2020.9510 | 0.9978  | <a href="#">QLEEAMNTQLELSEQLK</a>  |                           |

Mascot: <http://www.matrixscience.com/>

# MATRIX SCIENCE Mascot Search Results

## Peptide View

MS/MS Fragmentation of **SPYEMFGDEEVMCLNGNWTEPPQCK**

Found in **P08603** in **con\_Xuniprot\_HUMAN3**, CFAH\_HUMAN Complement factor H OS=Homo sapiens GN=CFH PE=1 SV=4

Match to Query 27288: 3034.221132 from(1012.414320,3+) intensity(38303.7031) rtinseconds(2038) scans(5253) index(26858)

Title: 111019\_Est\_MI\_YS\_G\_09Spectrum4575\_scans\_\_5253

Data file C:\mascot\20140703\_Tmgf\_1D\CSV\_UseAnalysis\MasterCSV\All\_Glyco\mgf\ptm\UC18ERLIC\_PTM\_35D.mgf

Click mouse within plot area to zoom in by factor of two about that point

Or, to Da

Label all possible matches Label matches used for scoring

Show Y-axis

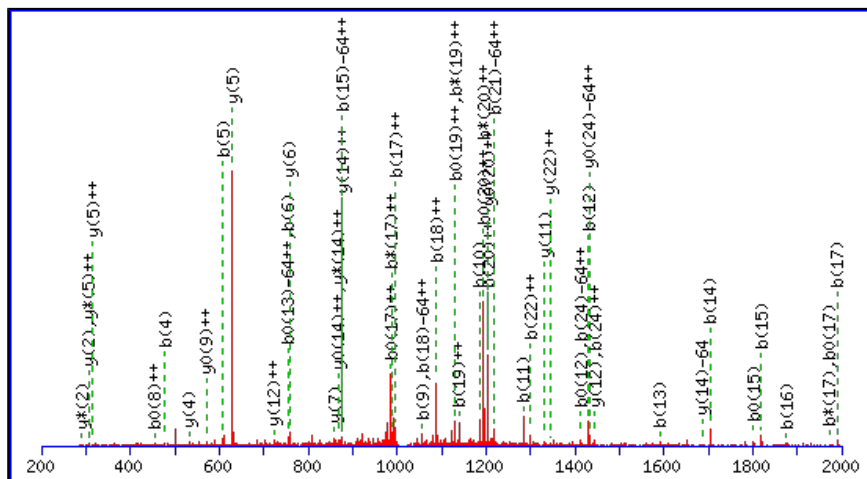

Monoisotopic mass of neutral peptide Mr(calc): 3034.2129

Fixed modifications: Carbamidomethyl (C) (apply to specified residues or termini only)

Variable modifications:

M12 : Oxidation (M), with neutral losses 0.0000 (shown in table), 63.9983

N17 : Deamidated (NQ)

Ions Score: 45 Expect: 0.00049

Matches : 53/388 fragment ions using 107 most intense peaks ([help](#))

| #  | b                | b <sup>++</sup>  | b <sup>*</sup>   | b <sup>*++</sup> | b <sup>0</sup>   | b <sup>0++</sup> | Seq. | y                | y <sup>++</sup>  | y <sup>*</sup> | y <sup>*++</sup> | y <sup>0</sup> | y <sup>0++</sup> | #  |
|----|------------------|------------------|------------------|------------------|------------------|------------------|------|------------------|------------------|----------------|------------------|----------------|------------------|----|
| 1  | 88.0393          | 44.5233          |                  |                  | 70.0287          | 35.5180          | S    |                  |                  |                |                  |                |                  | 25 |
| 2  | 185.0921         | 93.0497          |                  |                  | 167.0815         | 84.0444          | P    | 2948.1882        | 1474.5977        | 2931.1616      | 1466.0845        | 2930.1776      | 1465.5924        | 24 |
| 3  | 348.1554         | 174.5813         |                  |                  | 330.1448         | 165.5761         | Y    | 2851.1354        | 1426.0713        | 2834.1089      | 1417.5581        | 2833.1249      | 1417.0661        | 23 |
| 4  | <b>477.1980</b>  | 239.1026         |                  |                  | 459.1874         | 230.0974         | E    | 2688.0721        | <b>1344.5397</b> | 2671.0455      | 1336.0264        | 2670.0615      | 1335.5344        | 22 |
| 5  | <b>608.2385</b>  | 304.6229         |                  |                  | 590.2279         | 295.6176         | M    | 2559.0295        | 1280.0184        | 2542.0029      | 1271.5051        | 2541.0189      | 1271.0131        | 21 |
| 6  | <b>755.3069</b>  | 378.1571         |                  |                  | 737.2963         | 369.1518         | F    | 2427.9890        | 1214.4981        | 2410.9625      | 1205.9849        | 2409.9784      | <b>1205.4929</b> | 20 |
| 7  | 812.3284         | 406.6678         |                  |                  | 794.3178         | 397.6625         | G    | 2280.9206        | 1140.9639        | 2263.8940      | 1132.4507        | 2262.9100      | 1131.9587        | 19 |
| 8  | 927.3553         | 464.1813         |                  |                  | 909.3447         | <b>455.1760</b>  | D    | 2223.8991        | 1112.4532        | 2206.8726      | 1103.9399        | 2205.8886      | 1103.4479        | 18 |
| 9  | <b>1056.3979</b> | 528.7026         |                  |                  | 1038.3873        | 519.6973         | E    | 2108.8722        | 1054.9397        | 2091.8456      | 1046.4265        | 2090.8616      | 1045.9345        | 17 |
| 10 | <b>1185.4405</b> | 593.2239         |                  |                  | 1167.4299        | 584.2186         | E    | 1979.8296        | 990.4184         | 1962.8030      | 981.9052         | 1961.8190      | 981.4132         | 16 |
| 11 | <b>1284.5089</b> | 642.7581         |                  |                  | 1266.4983        | 633.7528         | V    | 1850.7870        | 925.8971         | 1833.7605      | 917.3839         | 1832.7764      | 916.8919         | 15 |
| 12 | <b>1431.5443</b> | 716.2758         |                  |                  | <b>1413.5337</b> | 707.2705         | M    | 1751.7186        | <b>876.3629</b>  | 1734.6920      | <b>867.8497</b>  | 1733.7080      | <b>867.3577</b>  | 14 |
| 13 | <b>1591.5749</b> | 796.2911         |                  |                  | 1573.5644        | 787.2858         | C    | 1604.6832        | 802.8452         | 1587.6566      | 794.3320         | 1586.6726      | 793.8400         | 13 |
| 14 | <b>1704.6590</b> | 852.8331         |                  |                  | 1686.6484        | 843.8279         | L    | <b>1444.6525</b> | <b>722.8299</b>  | 1427.6260      | 714.3166         | 1426.6420      | 713.8246         | 12 |
| 15 | <b>1818.7019</b> | 909.8546         | 1801.6754        | 901.3413         | <b>1800.6914</b> | 900.8493         | N    | <b>1331.5685</b> | 666.2879         | 1314.5419      | 657.7746         | 1313.5579      | 657.2826         | 11 |
| 16 | <b>1875.7234</b> | 938.3653         | 1858.6969        | 929.8521         | 1857.7128        | 929.3601         | G    | 1217.5256        | 609.2664         | 1200.4990      | 600.7531         | 1199.5150      | 600.2611         | 10 |
| 17 | <b>1990.7503</b> | <b>995.8788</b>  | <b>1973.7238</b> | <b>987.3655</b>  | <b>1972.7398</b> | <b>986.8735</b>  | N    | 1160.5041        | 580.7557         | 1143.4775      | 572.2424         | 1142.4935      | <b>571.7504</b>  | 9  |
| 18 | 2176.8297        | <b>1088.9185</b> | 2159.8031        | 1080.4052        | 2158.8191        | 1079.9132        | W    | 1045.4771        | 523.2422         | 1028.4506      | 514.7289         | 1027.4666      | 514.2369         | 8  |
| 19 | 2277.8773        | <b>1139.4423</b> | 2260.8508        | <b>1130.9290</b> | 2259.8668        | <b>1130.4370</b> | T    | <b>859.3978</b>  | 430.2026         | 842.3713       | 421.6893         | 841.3873       | 421.1973         | 7  |
| 20 | 2406.9199        | <b>1203.9636</b> | 2389.8934        | <b>1195.4503</b> | 2388.9094        | <b>1194.9583</b> | E    | <b>758.3502</b>  | 379.6787         | 741.3236       | 371.1654         | 740.3396       | 370.6734         | 6  |
| 21 | 2503.9727        | 1252.4900        | 2486.9461        | 1243.9767        | 2485.9621        | 1243.4847        | P    | <b>629.3076</b>  | <b>315.1574</b>  | 612.2810       | <b>306.6441</b>  |                |                  | 5  |
| 22 | 2601.0255        | <b>1301.0164</b> | 2583.9989        | 1292.5031        | 2583.0149        | 1292.0111        | P    | <b>532.2548</b>  | 266.6310         | 515.2282       | 258.1178         |                |                  | 4  |

|    |           |           |           |           |           |           |   |          |          |          |          |  |  |   |
|----|-----------|-----------|-----------|-----------|-----------|-----------|---|----------|----------|----------|----------|--|--|---|
| 23 | 2729.0840 | 1365.0457 | 2712.0575 | 1356.5324 | 2711.0735 | 1356.0404 | Q | 435.2020 | 218.1047 | 418.1755 | 209.5914 |  |  | 3 |
| 24 | 2889.1147 | 1445.0610 | 2872.0881 | 1436.5477 | 2871.1041 | 1436.0557 | C | 307.1435 | 154.0754 | 290.1169 | 145.5621 |  |  | 2 |
| 25 |           |           |           |           |           |           | K | 147.1128 | 74.0600  | 130.0863 | 65.5468  |  |  | 1 |

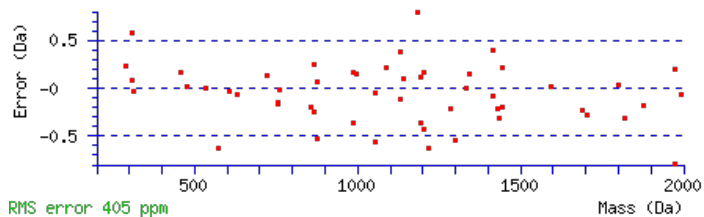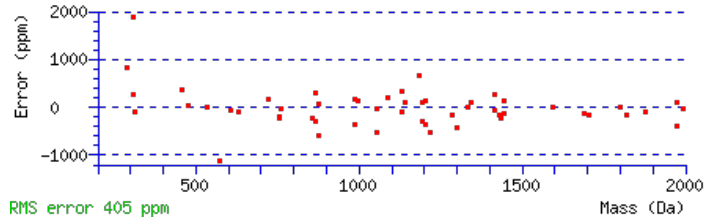

NCBI BLAST search of [SPYEMFGDEEVMCLNGNWTEPPQCK](#)  
 (Parameters: blastp, nr protein database, expect=20000, no filter, PAM30)  
 Other BLAST [web gateways](#)

All matches to this query

| Score | Mr(calc)  | Delta  | Sequence                                     | Site Analysis                         |
|-------|-----------|--------|----------------------------------------------|---------------------------------------|
| 45.3  | 3034.2129 | 0.0082 | <a href="#">SPYEMFGDEEVMCLNGNWTEPPQCK</a>    | Deamidated N17, Oxidation M12; 59.31% |
| 43.7  | 3033.2289 | 0.9922 | <a href="#">SPYEMFGDEEVMCLNGNWTEPPQCK</a>    |                                       |
| 41.6  | 3034.2129 | 0.0082 | <a href="#">SPYEMFGDEEVMCLNGNWTEPPQCK</a>    | Deamidated Q23, Oxidation M12; 25.48% |
| 38.8  | 3034.2129 | 0.0082 | <a href="#">SPYEMFGDEEVMCLNGNWTEPPQCK</a>    | Deamidated N15, Oxidation M12; 13.40% |
| 27.1  | 3034.2129 | 0.0082 | <a href="#">SPYEMFGDEEVMCLNGNWTEPPQCK</a>    | Deamidated N17, Oxidation M5; 0.89%   |
| 26.1  | 3033.2289 | 0.9922 | <a href="#">SPYEMFGDEEVMCLNGNWTEPPQCK</a>    |                                       |
| 24.5  | 3034.2129 | 0.0082 | <a href="#">SPYEMFGDEEVMCLNGNWTEPPQCK</a>    | Deamidated Q23, Oxidation M5; 0.49%   |
| 23.9  | 3034.2129 | 0.0082 | <a href="#">SPYEMFGDEEVMCLNGNWTEPPQCK</a>    | Deamidated N15, Oxidation M5; 0.43%   |
| 8.2   | 3033.2152 | 1.0060 | <a href="#">AALTHHPAAMSNGNMNTMGHMMEMMGSR</a> |                                       |
| 7.6   | 3033.2152 | 1.0060 | <a href="#">AALTHHPAAMSNGNMNTMGHMMEMMGSR</a> |                                       |

Mascot: <http://www.matrixscience.com/>

# MASCOT SCIENCE Mascot Search Results

## Peptide View

MS/MS Fragmentation of **WDPEVNC SMAQIQLCPPPPQIPNSHNM TTTLN YR**

Found in **P08603** in **con\_Xuniprot\_HUMAN3**, CFAH\_HUMAN Complement factor H OS=Homo sapiens GN=CFH PE=1 SV=4

Match to Query 28332: 4010.823096 from(1003.713050,4+) intensity(52049.0156) rtinseconds(2024) scans(5069) index(12773)

Title: 111019\_Est\_ISCardio\_NMI\_YS\_G\_9Spectrum4436\_scans\_\_5069

Data file C:\mascot\20140703\_Tmgf\_1D\CSV\_UseAnalysis\MasterCSV\All\_Glyco\mgf\ptm\UC18ERLIC\_PTM\_35D.mgf

Click mouse within plot area to zoom in by factor of two about that point

Or,  to  Da

Label all possible matches  Label matches used for scoring

Show Y-axis

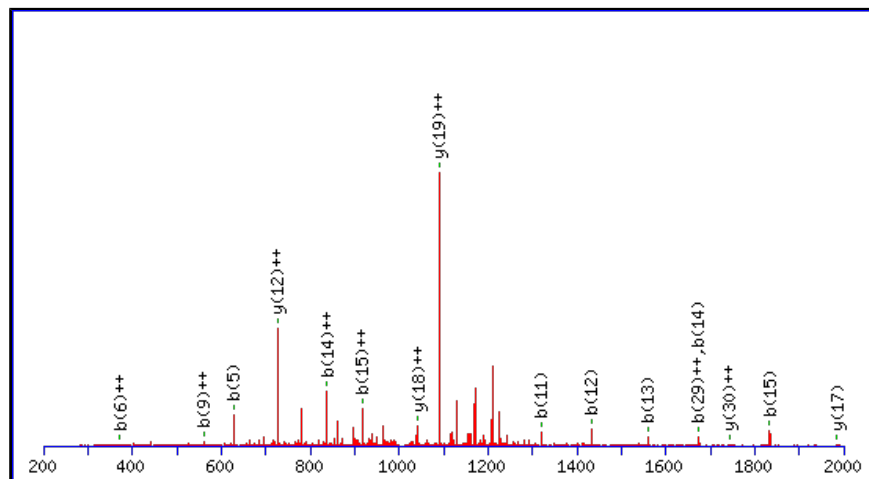

Monoisotopic mass of neutral peptide Mr(calc): 4010.8059

Fixed modifications: Carbamidomethyl (C) (apply to specified residues or termini only)

Variable modifications:

N6 : Deamidated (NQ)

N32 : Deamidated (NQ)

Ions Score: 43 Expect: 0.0085

Matches : 16/376 fragment ions using 18 most intense peaks ([help](#))

| #  | b                | b <sup>++</sup> | b <sup>*</sup> | b <sup>*++</sup> | b <sup>0</sup> | b <sup>0++</sup> | Seq. | y                | y <sup>++</sup>  | y <sup>*</sup> | y <sup>*++</sup> | y <sup>0</sup> | y <sup>0++</sup> | #  |
|----|------------------|-----------------|----------------|------------------|----------------|------------------|------|------------------|------------------|----------------|------------------|----------------|------------------|----|
| 1  | 187.0866         | 94.0469         |                |                  |                |                  | W    |                  |                  |                |                  |                |                  | 34 |
| 2  | 302.1135         | 151.5604        |                |                  | 284.1030       | 142.5551         | D    | 3825.7339        | 1913.3706        | 3808.7074      | 1904.8573        | 3807.7234      | 1904.3653        | 33 |
| 3  | 399.1663         | 200.0868        |                |                  | 381.1557       | 191.0815         | P    | 3710.7070        | 1855.8571        | 3693.6804      | 1847.3439        | 3692.6964      | 1846.8518        | 32 |
| 4  | 528.2089         | 264.6081        |                |                  | 510.1983       | 255.6028         | E    | 3613.6542        | 1807.3308        | 3596.6277      | 1798.8175        | 3595.6437      | 1798.3255        | 31 |
| 5  | <b>627.2773</b>  | 314.1423        |                |                  | 609.2667       | 305.1370         | V    | 3484.6116        | <b>1742.8095</b> | 3467.5851      | 1734.2962        | 3466.6011      | 1733.8042        | 30 |
| 6  | 742.3042         | <b>371.6558</b> | 725.2777       | 363.1425         | 724.2937       | 362.6505         | N    | 3385.5432        | 1693.2752        | 3368.5167      | 1684.7620        | 3367.5327      | 1684.2700        | 29 |
| 7  | 902.3349         | 451.6711        | 885.3083       | 443.1578         | 884.3243       | 442.6658         | C    | 3270.5163        | 1635.7618        | 3253.4897      | 1627.2485        | 3252.5057      | 1626.7565        | 28 |
| 8  | 989.3669         | 495.1871        | 972.3404       | 486.6738         | 971.3564       | 486.1818         | S    | 3110.4856        | 1555.7465        | 3093.4591      | 1547.2332        | 3092.4751      | 1546.7412        | 27 |
| 9  | 1120.4074        | <b>560.7073</b> | 1103.3809      | 552.1941         | 1102.3968      | 551.7021         | M    | 3023.4536        | 1512.2304        | 3006.4270      | 1503.7172        | 3005.4430      | 1503.2252        | 26 |
| 10 | 1191.4445        | 596.2259        | 1174.4180      | 587.7126         | 1173.4340      | 587.2206         | A    | 2892.4131        | 1446.7102        | 2875.3866      | 1438.1969        | 2874.4025      | 1437.7049        | 25 |
| 11 | <b>1319.5031</b> | 660.2552        | 1302.4766      | 651.7419         | 1301.4925      | 651.2499         | Q    | 2821.3760        | 1411.1916        | 2804.3494      | 1402.6784        | 2803.3654      | 1402.1864        | 24 |
| 12 | <b>1432.5872</b> | 716.7972        | 1415.5606      | 708.2839         | 1414.5766      | 707.7919         | I    | 2693.3174        | 1347.1623        | 2676.2909      | 1338.6491        | 2675.3069      | 1338.1571        | 23 |
| 13 | <b>1560.6457</b> | 780.8265        | 1543.6192      | 772.3132         | 1542.6352      | 771.8212         | Q    | 2580.2334        | 1290.6203        | 2563.2068      | 1282.1070        | 2562.2228      | 1281.6150        | 22 |
| 14 | <b>1673.7298</b> | <b>837.3685</b> | 1656.7033      | 828.8553         | 1655.7192      | 828.3633         | L    | 2452.1748        | 1226.5910        | 2435.1482      | 1218.0778        | 2434.1642      | 1217.5857        | 21 |
| 15 | <b>1833.7605</b> | <b>917.3839</b> | 1816.7339      | 908.8706         | 1815.7499      | 908.3786         | C    | 2339.0907        | 1170.0490        | 2322.0642      | 1161.5357        | 2321.0801      | 1161.0437        | 20 |
| 16 | 1930.8132        | 965.9102        | 1913.7867      | 957.3970         | 1912.8027      | 956.9050         | P    | 2179.0601        | <b>1090.0337</b> | 2162.0335      | 1081.5204        | 2161.0495      | 1081.0284        | 19 |
| 17 | 2027.8660        | 1014.4366       | 2010.8394      | 1005.9234        | 2009.8554      | 1005.4313        | P    | 2082.0073        | <b>1041.5073</b> | 2064.9808      | 1032.9940        | 2063.9967      | 1032.5020        | 18 |
| 18 | 2124.9187        | 1062.9630       | 2107.8922      | 1054.4497        | 2106.9082      | 1053.9577        | P    | <b>1984.9545</b> | 992.9809         | 1967.9280      | 984.4676         | 1966.9440      | 983.9756         | 17 |
| 19 | 2221.9715        | 1111.4894       | 2204.9450      | 1102.9761        | 2203.9609      | 1102.4841        | P    | 1887.9018        | 944.4545         | 1870.8752      | 935.9413         | 1869.8912      | 935.4492         | 16 |
| 20 | 2350.0301        | 1175.5187       | 2333.0035      | 1167.0054        | 2332.0195      | 1166.5134        | Q    | 1790.8490        | 895.9281         | 1773.8225      | 887.4149         | 1772.8384      | 886.9229         | 15 |
| 21 | 2463.1142        | 1232.0607       | 2446.0876      | 1223.5474        | 2445.1036      | 1223.0554        | I    | 1662.7904        | 831.8989         | 1645.7639      | 823.3856         | 1644.7799      | 822.8936         | 14 |
| 22 | 2560.1669        | 1280.5871       | 2543.1404      | 1272.0738        | 2542.1564      | 1271.5818        | P    | 1549.7064        | 775.3568         | 1532.6798      | 766.8435         | 1531.6958      | 766.3515         | 13 |



|    |           |           |           |           |           |           |   |           |          |           |          |           |          |    |
|----|-----------|-----------|-----------|-----------|-----------|-----------|---|-----------|----------|-----------|----------|-----------|----------|----|
| 23 | 2674.2098 | 1337.6086 | 2657.1833 | 1329.0953 | 2656.1993 | 1328.6033 | N | 1452.6536 | 726.8304 | 1435.6271 | 718.3172 | 1434.6430 | 717.8252 | 12 |
| 24 | 2761.2419 | 1381.1246 | 2744.2153 | 1372.6113 | 2743.2313 | 1372.1193 | S | 1338.6107 | 669.8090 | 1321.5841 | 661.2957 | 1320.6001 | 660.8037 | 11 |
| 25 | 2898.3008 | 1449.6540 | 2881.2742 | 1441.1408 | 2880.2902 | 1440.6487 | H | 1251.5786 | 626.2930 | 1234.5521 | 617.7797 | 1233.5681 | 617.2877 | 10 |
| 26 | 3012.3437 | 1506.6755 | 2995.3172 | 1498.1622 | 2994.3331 | 1497.6702 | N | 1114.5197 | 557.7635 | 1097.4932 | 549.2502 | 1096.5092 | 548.7582 | 9  |
| 27 | 3143.3842 | 1572.1957 | 3126.3576 | 1563.6825 | 3125.3736 | 1563.1905 | M | 1000.4768 | 500.7420 | 983.4503  | 492.2288 | 982.4662  | 491.7368 | 8  |
| 28 | 3244.4319 | 1622.7196 | 3227.4053 | 1614.2063 | 3226.4213 | 1613.7143 | T | 869.4363  | 435.2218 | 852.4098  | 426.7085 | 851.4258  | 426.2165 | 7  |
| 29 | 3345.4796 | 1673.2434 | 3328.4530 | 1664.7301 | 3327.4690 | 1664.2381 | T | 768.3886  | 384.6980 | 751.3621  | 376.1847 | 750.3781  | 375.6927 | 6  |
| 30 | 3446.5272 | 1723.7673 | 3429.5007 | 1715.2540 | 3428.5167 | 1714.7620 | T | 667.3410  | 334.1741 | 650.3144  | 325.6608 | 649.3304  | 325.1688 | 5  |
| 31 | 3559.6113 | 1780.3093 | 3542.5847 | 1771.7960 | 3541.6007 | 1771.3040 | L | 566.2933  | 283.6503 | 549.2667  | 275.1370 |           |          | 4  |
| 32 | 3674.6382 | 1837.8228 | 3657.6117 | 1829.3095 | 3656.6277 | 1828.8175 | N | 453.2092  | 227.1082 | 436.1827  | 218.5950 |           |          | 3  |
| 33 | 3837.7016 | 1919.3544 | 3820.6750 | 1910.8411 | 3819.6910 | 1910.3491 | Y | 338.1823  | 169.5948 | 321.1557  | 161.0815 |           |          | 2  |
| 34 |           |           |           |           |           |           | R | 175.1190  | 88.0631  | 158.0924  | 79.5498  |           |          | 1  |

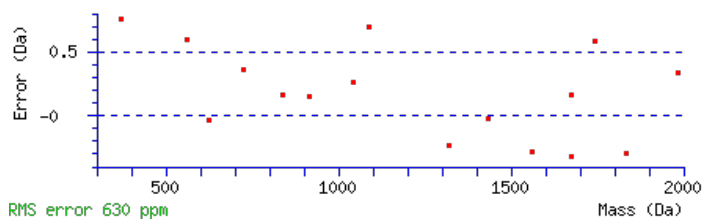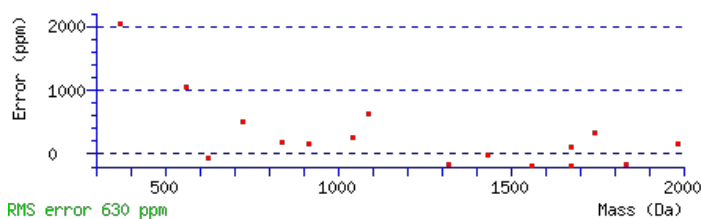

NCBI BLAST search of [WDPEVNC SMAQIQLCPPPPQIPNSHNMTTTLNYR](#)

(Parameters: blastp, nr protein database, expect=20000, no filter, PAM30)

Other BLAST [web gateways](#)

All matches to this query

| Score | Mr(calc)  | Delta  | Sequence                                            | Site Analysis             |
|-------|-----------|--------|-----------------------------------------------------|---------------------------|
| 42.6  | 4010.8059 | 0.0172 | <a href="#">WDPEVNC SMAQIQLCPPPPQIPNSHNMTTTLNYR</a> | Deamidated N6, N32 89.82% |
| 30.3  | 4009.8219 | 1.0012 | <a href="#">WDPEVNC SMAQIQLCPPPPQIPNSHNMTTTLNYR</a> |                           |
| 26.9  | 4010.8059 | 0.0172 | <a href="#">WDPEVNC SMAQIQLCPPPPQIPNSHNMTTTLNYR</a> | Deamidated N26, N32 2.40% |
| 24.4  | 4010.8059 | 0.0172 | <a href="#">WDPEVNC SMAQIQLCPPPPQIPNSHNMTTTLNYR</a> | Deamidated N6, Q11 1.34%  |
| 23.9  | 4010.8059 | 0.0172 | <a href="#">WDPEVNC SMAQIQLCPPPPQIPNSHNMTTTLNYR</a> | Deamidated N23, N26 1.20% |
| 23.9  | 4010.8059 | 0.0172 | <a href="#">WDPEVNC SMAQIQLCPPPPQIPNSHNMTTTLNYR</a> | Deamidated Q20, N23 1.20% |
| 20.0  | 4009.8219 | 1.0012 | <a href="#">WDPEVNC SMAQIQLCPPPPQIPNSHNMTTTLNYR</a> |                           |
| 19.0  | 4010.8059 | 0.0172 | <a href="#">WDPEVNC SMAQIQLCPPPPQIPNSHNMTTTLNYR</a> | Deamidated Q13, Q20 0.39% |
| 18.0  | 4009.8219 | 1.0012 | <a href="#">WDPEVNC SMAQIQLCPPPPQIPNSHNMTTTLNYR</a> |                           |
| 18.0  | 4009.8219 | 1.0012 | <a href="#">WDPEVNC SMAQIQLCPPPPQIPNSHNMTTTLNYR</a> |                           |

Mascot: <http://www.matrixscience.com/>

# MATRIX SCIENCE Mascot Search Results

## Peptide View

MS/MS Fragmentation of **MDGASNVTCSNR**

Found in **P08603** in **con\_Xuniprot\_HUMAN3**, CFAH\_HUMAN Complement factor H OS=Homo sapiens GN=CFH PE=1 SV=4

Match to Query 3196: 1425.587808 from(713.801180,2+) intensity(1074.9924) rtinseconds(483) scans(624) index(480)

Title: 111019\_Est\_ISCardio\_NMI\_200000g\_G\_7Spectrum437\_scans\_624

Data file C:\\mascot\\20140703\_Tmgf\_1D\\CSV\_UseAnalysis\\MasterCSV\\All\_Glyco\\mgf\\ptm\\UC18ERLIC\_PTM\_35D.mgf

Click mouse within plot area to zoom in by factor of two about that point

Or, to Da

Label all possible matches Label matches used for scoring

Show Y-axis

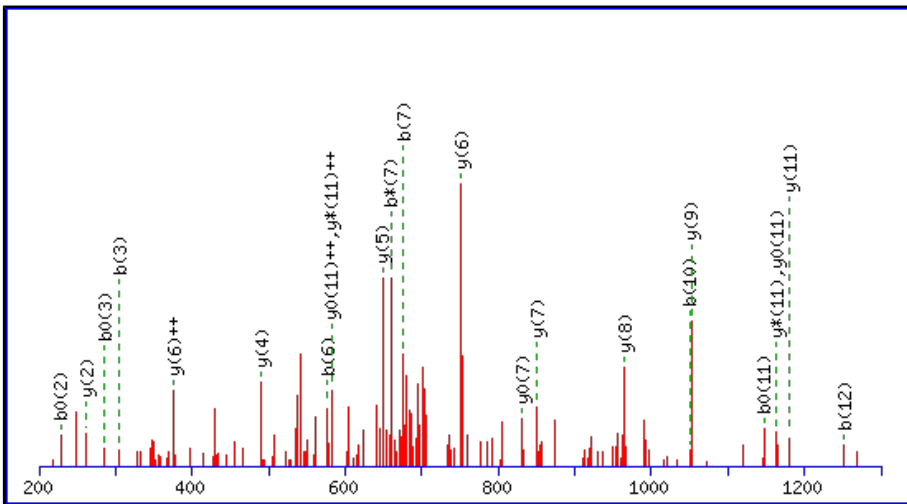

**Monoisotopic mass of neutral peptide Mr(calc):** 1425.5864

**Fixed modifications:** Carbamidomethyl (C) (apply to specified residues or termini only)

**Variable modifications:**

N6 : Deamidated (NQ)

N11 : Deamidated (NQ)

**Ions Score:** 39 **Expect:** 0.0048

**Matches :** 23/130 fragment ions using 52 most intense peaks ([help](#))

| #  | b                | b <sup>++</sup> | b <sup>*</sup>  | b <sup>*++</sup> | b <sup>0</sup>   | b <sup>0++</sup> | Seq.     | y                | y <sup>++</sup> | y <sup>*</sup>   | y <sup>*++</sup> | y <sup>0</sup>   | y <sup>0++</sup> | #  |
|----|------------------|-----------------|-----------------|------------------|------------------|------------------|----------|------------------|-----------------|------------------|------------------|------------------|------------------|----|
| 1  | 132.0478         | 66.5275         |                 |                  |                  |                  | <b>M</b> |                  |                 |                  |                  |                  |                  | 13 |
| 2  | 247.0747         | 124.0410        |                 |                  | 229.0641         | 115.0357         | <b>D</b> | 1295.5532        | 648.2802        | 1278.5267        | 639.7670         | 1277.5427        | 639.2750         | 12 |
| 3  | <b>304.0962</b>  | 152.5517        |                 |                  | <b>286.0856</b>  | 143.5464         | <b>G</b> | <b>1180.5263</b> | 590.7668        | <b>1163.4997</b> | <b>582.2535</b>  | <b>1162.5157</b> | <b>581.7615</b>  | 11 |
| 4  | 375.1333         | 188.0703        |                 |                  | 357.1227         | 179.0650         | <b>A</b> | 1123.5048        | 562.2560        | 1106.4783        | 553.7428         | 1105.4942        | 553.2508         | 10 |
| 5  | 462.1653         | 231.5863        |                 |                  | 444.1547         | 222.5810         | <b>S</b> | <b>1052.4677</b> | 526.7375        | 1035.4412        | 518.2242         | 1034.4571        | 517.7322         | 9  |
| 6  | <b>577.1923</b>  | 289.0998        | 560.1657        | 280.5865         | 559.1817         | 280.0945         | <b>N</b> | <b>965.4357</b>  | 483.2215        | 948.4091         | 474.7082         | 947.4251         | 474.2162         | 8  |
| 7  | <b>676.2607</b>  | 338.6340        | <b>659.2341</b> | 330.1207         | 658.2501         | 329.6287         | <b>V</b> | <b>850.4087</b>  | 425.7080        | 833.3822         | 417.1947         | <b>832.3982</b>  | 416.7027         | 7  |
| 8  | 777.3083         | 389.1578        | 760.2818        | 380.6445         | 759.2978         | 380.1525         | <b>T</b> | <b>751.3403</b>  | <b>376.1738</b> | 734.3138         | 367.6605         | 733.3298         | 367.1685         | 6  |
| 9  | 937.3390         | 469.1731        | 920.3124        | 460.6599         | 919.3284         | 460.1679         | <b>C</b> | <b>650.2926</b>  | 325.6500        | 633.2661         | 317.1367         | 632.2821         | 316.6447         | 5  |
| 10 | <b>1050.4231</b> | 525.7152        | 1033.3965       | 517.2019         | 1032.4125        | 516.7099         | <b>I</b> | <b>490.2620</b>  | 245.6346        | 473.2354         | 237.1214         | 472.2514         | 236.6293         | 4  |
| 11 | 1165.4500        | 583.2286        | 1148.4235       | 574.7154         | <b>1147.4394</b> | 574.2234         | <b>N</b> | 377.1779         | 189.0926        | 360.1514         | 180.5793         | 359.1674         | 180.0873         | 3  |
| 12 | <b>1252.4820</b> | 626.7447        | 1235.4555       | 618.2314         | 1234.4715        | 617.7394         | <b>S</b> | <b>262.1510</b>  | 131.5791        | 245.1244         | 123.0659         | 244.1404         | 122.5738         | 2  |
| 13 |                  |                 |                 |                  |                  |                  | <b>R</b> | 175.1190         | 88.0631         | 158.0924         | 79.5498          |                  |                  | 1  |

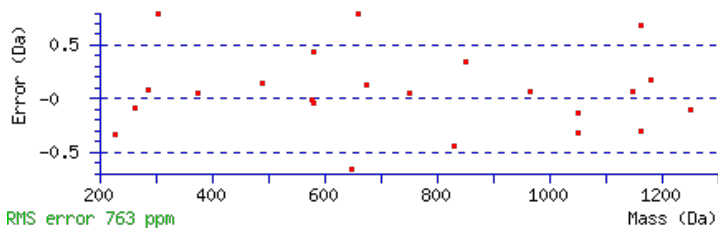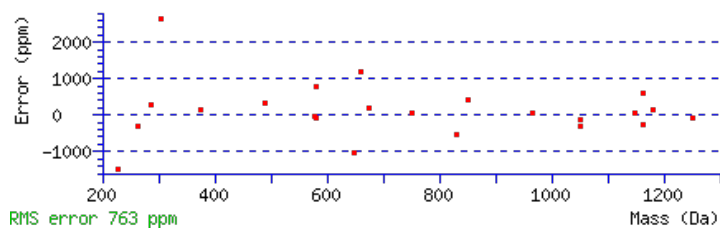

NCBI **BLAST** search of [MDGASNVTCINSR](#)

(Parameters: blastp, nr protein database, expect=20000, no filter, PAM30)

Other BLAST [web gateways](#)

**All matches to this query**

| Score | Mr(calc)  | Delta  | Sequence                      |
|-------|-----------|--------|-------------------------------|
| 38.7  | 1425.5864 | 0.0014 | <a href="#">MDGASNVTCINSR</a> |
| 7.1   | 1425.5864 | 0.0014 | <a href="#">MVVQNSADAGDMR</a> |
| 7.0   | 1425.5864 | 0.0014 | <a href="#">MVVQNSADAGDMR</a> |
| 6.2   | 1424.5903 | 0.9975 | <a href="#">DQENSVQSSNSTK</a> |
| 5.2   | 1424.5903 | 0.9975 | <a href="#">DQENSVQSSNSTK</a> |
| 5.2   | 1424.5903 | 0.9975 | <a href="#">DQENSVQSSNSTK</a> |
| 3.4   | 1424.5903 | 0.9975 | <a href="#">DQENSVQSSNSTK</a> |
| 3.4   | 1424.5903 | 0.9975 | <a href="#">DQENSVQSSNSTK</a> |
| 3.0   | 1425.5830 | 0.0048 | <a href="#">ENTNTATPFCNR</a>  |
| 3.0   | 1425.5830 | 0.0048 | <a href="#">QNTNTATPFCNR</a>  |

Mascot: <http://www.matrixscience.com/>

# MASCOT SCIENCE Mascot Search Results

## Peptide View

MS/MS Fragmentation of **WDPEVNC SMAQIQLCPPPPQIPNSHNM TTTLN YR**

Found in **P08603** in **con\_Xuniprot\_HUMAN3**, CFAH\_HUMAN Complement factor H OS=Homo sapiens GN=CFH PE=1 SV=4

Match to Query 28336: 4011.839502 from(1338.287110,3+) intensity(0.0000) rtinseconds(2032) scans(5317) index(19779)

Title: 111019\_Est\_MI\_YP\_G\_09Spectrum4694\_scans\_\_5317

Data file C:\mascot\20140703\_Tmgf\_1D\CSV\_UseAnalysis\MasterCSV\All\_Glyco\mgf\ptm\UC18ERLIC\_PTM\_35D.mgf

Click mouse within plot area to zoom in by factor of two about that point

Or, to Da

Label all possible matches Label matches used for scoring

Show Y-axis

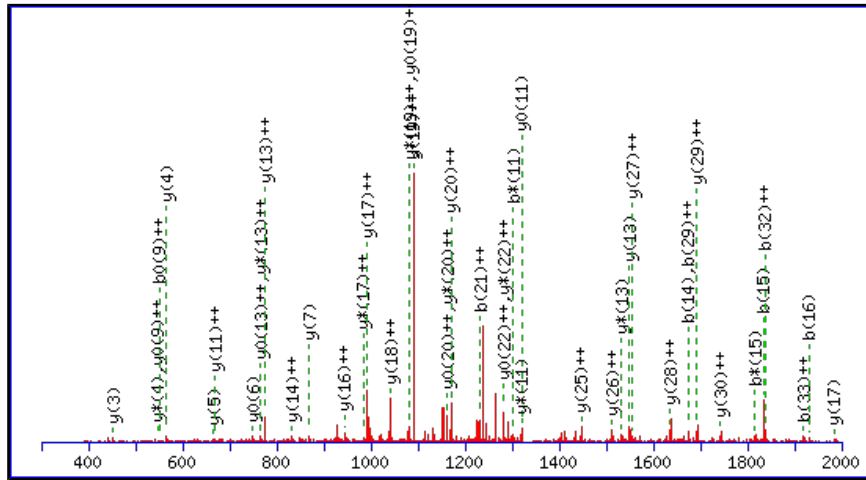

Monoisotopic mass of neutral peptide Mr(calc): 4009.8219

Fixed modifications: Carbamidomethyl (C) (apply to specified residues or termini only)

Variable modifications:

N26 : Deamidated (NQ)

Ions Score: 37 Expect: 0.033

Matches : 45/376 fragment ions using 97 most intense peaks ([help](#))

| #  | b         | b <sup>++</sup> | b <sup>*</sup> | b <sup>*++</sup> | b <sup>0</sup> | b <sup>0++</sup> | Seq. | y         | y <sup>++</sup> | y <sup>*</sup> | y <sup>*++</sup> | y <sup>0</sup> | y <sup>0++</sup> | #  |
|----|-----------|-----------------|----------------|------------------|----------------|------------------|------|-----------|-----------------|----------------|------------------|----------------|------------------|----|
| 1  | 187.0866  | 94.0469         |                |                  |                |                  | W    |           |                 |                |                  |                |                  | 34 |
| 2  | 302.1135  | 151.5604        |                |                  | 284.1030       | 142.5551         | D    | 3824.7499 | 1912.8786       | 3807.7234      | 1904.3653        | 3806.7394      | 1903.8733        | 33 |
| 3  | 399.1663  | 200.0868        |                |                  | 381.1557       | 191.0815         | P    | 3709.7230 | 1855.3651       | 3692.6964      | 1846.8518        | 3691.7124      | 1846.3598        | 32 |
| 4  | 528.2089  | 264.6081        |                |                  | 510.1983       | 255.6028         | E    | 3612.6702 | 1806.8387       | 3595.6437      | 1798.3255        | 3594.6596      | 1797.8335        | 31 |
| 5  | 627.2773  | 314.1423        |                |                  | 609.2667       | 305.1370         | V    | 3483.6276 | 1742.3174       | 3466.6011      | 1733.8042        | 3465.6171      | 1733.3122        | 30 |
| 6  | 741.3202  | 371.1638        | 724.2937       | 362.6505         | 723.3097       | 362.1585         | N    | 3384.5592 | 1692.7832       | 3367.5327      | 1684.2700        | 3366.5486      | 1683.7780        | 29 |
| 7  | 901.3509  | 451.1791        | 884.3243       | 442.6658         | 883.3403       | 442.1738         | C    | 3270.5163 | 1635.7618       | 3253.4897      | 1627.2485        | 3252.5057      | 1626.7565        | 28 |
| 8  | 988.3829  | 494.6951        | 971.3564       | 486.1818         | 970.3723       | 485.6898         | S    | 3110.4856 | 1555.7465       | 3093.4591      | 1547.2332        | 3092.4751      | 1546.7412        | 27 |
| 9  | 1119.4234 | 560.2153        | 1102.3968      | 551.7021         | 1101.4128      | 551.2101         | M    | 3023.4536 | 1512.2304       | 3006.4270      | 1503.7172        | 3005.4430      | 1503.2252        | 26 |
| 10 | 1190.4605 | 595.7339        | 1173.4340      | 587.2206         | 1172.4499      | 586.7286         | A    | 2892.4131 | 1446.7102       | 2875.3866      | 1438.1969        | 2874.4025      | 1437.7049        | 25 |
| 11 | 1318.5191 | 659.7632        | 1301.4925      | 651.2499         | 1300.5085      | 650.7579         | Q    | 2821.3760 | 1411.1916       | 2804.3494      | 1402.6784        | 2803.3654      | 1402.1864        | 24 |
| 12 | 1431.6031 | 716.3052        | 1414.5766      | 707.7919         | 1413.5926      | 707.2999         | I    | 2693.3174 | 1347.1623       | 2676.2909      | 1338.6491        | 2675.3069      | 1338.1571        | 23 |
| 13 | 1559.6617 | 780.3345        | 1542.6352      | 771.8212         | 1541.6512      | 771.3292         | Q    | 2580.2334 | 1290.6203       | 2563.2068      | 1282.1070        | 2562.2228      | 1281.6150        | 22 |
| 14 | 1672.7458 | 836.8765        | 1655.7192      | 828.3633         | 1654.7352      | 827.8713         | L    | 2452.1748 | 1226.5910       | 2435.1482      | 1218.0778        | 2434.1642      | 1217.5857        | 21 |
| 15 | 1832.7764 | 916.8919        | 1815.7499      | 908.3786         | 1814.7659      | 907.8866         | C    | 2339.0907 | 1170.0490       | 2322.0642      | 1161.5357        | 2321.0801      | 1161.0437        | 20 |
| 16 | 1929.8292 | 965.4182        | 1912.8027      | 956.9050         | 1911.8186      | 956.4130         | P    | 2179.0601 | 1090.0337       | 2162.0335      | 1081.5204        | 2161.0495      | 1081.0284        | 19 |
| 17 | 2026.8820 | 1013.9446       | 2009.8554      | 1005.4313        | 2008.8714      | 1004.9393        | P    | 2082.0073 | 1041.5073       | 2064.9808      | 1032.9940        | 2063.9967      | 1032.5020        | 18 |
| 18 | 2123.9347 | 1062.4710       | 2106.9082      | 1053.9577        | 2105.9242      | 1053.4657        | P    | 1984.9545 | 992.9809        | 1967.9280      | 984.4676         | 1966.9440      | 983.9756         | 17 |
| 19 | 2220.9875 | 1110.9974       | 2203.9609      | 1102.4841        | 2202.9769      | 1101.9921        | P    | 1887.9018 | 944.4545        | 1870.8752      | 935.9413         | 1869.8912      | 935.4492         | 16 |
| 20 | 2349.0461 | 1175.0267       | 2332.0195      | 1166.5134        | 2331.0355      | 1166.0214        | Q    | 1790.8490 | 895.9281        | 1773.8225      | 887.4149         | 1772.8384      | 886.9229         | 15 |
| 21 | 2462.1301 | 1231.5687       | 2445.1036      | 1223.0554        | 2444.1196      | 1222.5634        | I    | 1662.7904 | 831.8989        | 1645.7639      | 823.3856         | 1644.7799      | 822.8936         | 14 |
| 22 | 2559.1829 | 1280.0951       | 2542.1564      | 1271.5818        | 2541.1723      | 1271.0898        | P    | 1549.7064 | 775.3568        | 1532.6798      | 766.8435         | 1531.6958      | 766.3515         | 13 |
| 23 | 2673.2258 | 1337.1166       | 2656.1993      | 1328.6033        | 2655.2153      | 1328.1113        | N    | 1452.6536 | 726.8304        | 1435.6271      | 718.3172         | 1434.6430      | 717.8252         | 12 |

|    |           |           |           |           |           |           |   |           |          |           |          |           |          |    |
|----|-----------|-----------|-----------|-----------|-----------|-----------|---|-----------|----------|-----------|----------|-----------|----------|----|
| 24 | 2760.2579 | 1380.6326 | 2743.2313 | 1372.1193 | 2742.2473 | 1371.6273 | S | 1338.6107 | 669.8090 | 1321.5841 | 661.2957 | 1320.6001 | 660.8037 | 11 |
| 25 | 2897.3168 | 1449.1620 | 2880.2902 | 1440.6487 | 2879.3062 | 1440.1567 | H | 1251.5786 | 626.2930 | 1234.5521 | 617.7797 | 1233.5681 | 617.2877 | 10 |
| 26 | 3012.3437 | 1506.6755 | 2995.3172 | 1498.1622 | 2994.3331 | 1497.6702 | N | 1114.5197 | 557.7635 | 1097.4932 | 549.2502 | 1096.5092 | 548.7582 | 9  |
| 27 | 3143.3842 | 1572.1957 | 3126.3576 | 1563.6825 | 3125.3736 | 1563.1905 | M | 999.4928  | 500.2500 | 982.4662  | 491.7368 | 981.4822  | 491.2448 | 8  |
| 28 | 3244.4319 | 1622.7196 | 3227.4053 | 1614.2063 | 3226.4213 | 1613.7143 | T | 868.4523  | 434.7298 | 851.4258  | 426.2165 | 850.4417  | 425.7245 | 7  |
| 29 | 3345.4796 | 1673.2434 | 3328.4530 | 1664.7301 | 3327.4690 | 1664.2381 | T | 767.4046  | 384.2060 | 750.3781  | 375.6927 | 749.3941  | 375.2007 | 6  |
| 30 | 3446.5272 | 1723.7673 | 3429.5007 | 1715.2540 | 3428.5167 | 1714.7620 | T | 666.3570  | 333.6821 | 649.3304  | 325.1688 | 648.3464  | 324.6768 | 5  |
| 31 | 3559.6113 | 1780.3093 | 3542.5847 | 1771.7960 | 3541.6007 | 1771.3040 | L | 565.3093  | 283.1583 | 548.2827  | 274.6450 |           |          | 4  |
| 32 | 3673.6542 | 1837.3307 | 3656.6277 | 1828.8175 | 3655.6437 | 1828.3255 | N | 452.2252  | 226.6162 | 435.1987  | 218.1030 |           |          | 3  |
| 33 | 3836.7176 | 1918.8624 | 3819.6910 | 1910.3491 | 3818.7070 | 1909.8571 | Y | 338.1823  | 169.5948 | 321.1557  | 161.0815 |           |          | 2  |
| 34 |           |           |           |           |           |           | R | 175.1190  | 88.0631  | 158.0924  | 79.5498  |           |          | 1  |

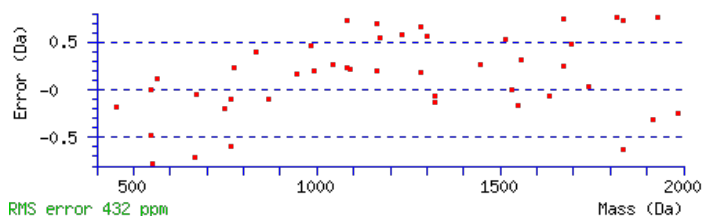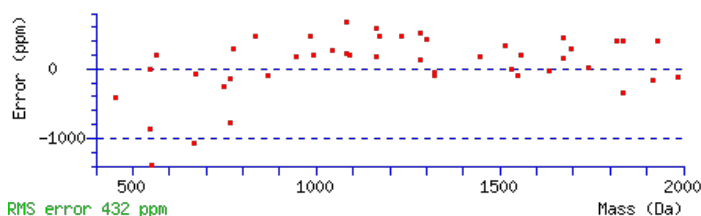

NCBI BLAST search of [WDPEVNCSMAQIQLCPPPPQIPNSHNMTTTLNYR](#)

(Parameters: blastp, nr protein database, expect=20000, no filter, PAM30)

Other BLAST [web gateways](#)

All matches to this query

| Score | Mr(calc)  | Delta   | Sequence                                                | Site Analysis         |
|-------|-----------|---------|---------------------------------------------------------|-----------------------|
| 37.4  | 4009.8219 | 2.0176  | <a href="#">WDPEVNCSMAQIQLCPPPPQIPNSHNMTTTLNYR</a>      | Deamidated N26 32.39% |
| 37.3  | 4009.8219 | 2.0176  | <a href="#">WDPEVNCSMAQIQLCPPPPQIPNSHNMTTTLNYR</a>      | Deamidated N23 32.17% |
| 34.4  | 4009.8219 | 2.0176  | <a href="#">WDPEVNCSMAQIQLCPPPPQIPNSHNMTTTLNYR</a>      | Deamidated N32 16.50% |
| 31.9  | 4009.8219 | 2.0176  | <a href="#">WDPEVNCSMAQIQLCPPPPQIPNSHNMTTTLNYR</a>      | Deamidated Q11 9.17%  |
| 30.0  | 4009.8219 | 2.0176  | <a href="#">WDPEVNCSMAQIQLCPPPPQIPNSHNMTTTLNYR</a>      | Deamidated Q20 5.93%  |
| 26.2  | 4009.8219 | 2.0176  | <a href="#">WDPEVNCSMAQIQLCPPPPQIPNSHNMTTTLNYR</a>      | Deamidated N6 2.45%   |
| 23.7  | 4009.8219 | 2.0176  | <a href="#">WDPEVNCSMAQIQLCPPPPQIPNSHNMTTTLNYR</a>      | Deamidated Q13 1.39%  |
| 9.7   | 4011.8532 | -0.0137 | <a href="#">FTVDTISAGQGDVMVFVEDPEGNKEEAQVTPDSDKNK</a>   |                       |
| 6.7   | 4009.8139 | 2.0256  | <a href="#">SASNGIMGTSSNGLNGQNGIMGQNGMMGPQPIVSYSSNR</a> |                       |
| 5.3   | 4010.8269 | 1.0126  | <a href="#">LYELDLTNQTLDDAVQWTSTWSSPLGCNASFSPHR</a>     |                       |

Mascot: <http://www.matrixscience.com/>

# MATRIX SCIENCE Mascot Search Results

## Peptide View

MS/MS Fragmentation of **WDPEVNC SMAQIQLCPPPPQIPNSHNM TTTLN YR**

Found in **P08603** in **con\_Xuniprot\_HUMAN3**, CFAH\_HUMAN Complement factor H OS=Homo sapiens GN=CFH PE=1 SV=4

Match to Query 28359: 4042.810256 from(1011.709840,4+) intensity(30689.8672) rtinseconds(1571) scans(4053) index(6452)

Title: 111019\_Est\_ISCardio\_NMI\_YP\_G\_9Spectrum3562\_scans\_\_4053

Data file C:\mascot\20140703\_Tmgf\_1D\CSV\_UseAnalysis\MasterCSV\All\_Glyco\mgf\ptm\UC18ERLIC\_PTM\_35D.mgf

Click mouse within plot area to zoom in by factor of two about that point

Or,  to  Da

Label all possible matches  Label matches used for scoring

Show Y-axis

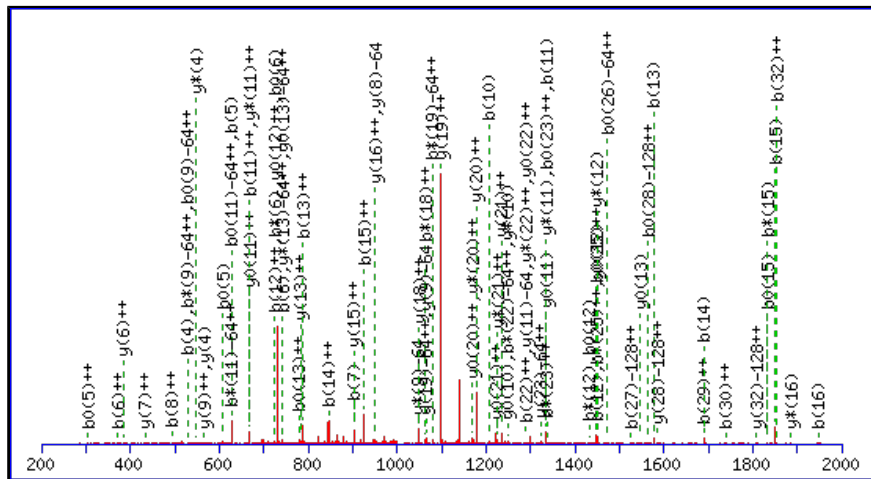

Monoisotopic mass of neutral peptide Mr(calc): 4042.7958

Fixed modifications: Carbamidomethyl (C) (apply to specified residues or termini only)

Variable modifications:

N6 : Deamidated (NQ)

M9 : Oxidation (M), with neutral losses 0.0000(shown in table), 63.9983

Q11 : Deamidated (NQ)

M27 : Oxidation (M), with neutral losses 0.0000(shown in table), 63.9983

Ions Score: 35 Expect: 0.033

Matches : 84/682 fragment ions using 132 most intense peaks ([help](#))

| #  | b                | b <sup>++</sup> | b <sup>*</sup>   | b <sup>*++</sup> | b <sup>0</sup>   | b <sup>0++</sup> | Seq. | y         | y <sup>++</sup>  | y <sup>*</sup>   | y <sup>*++</sup> | y <sup>0</sup> | y <sup>0++</sup> | #  |
|----|------------------|-----------------|------------------|------------------|------------------|------------------|------|-----------|------------------|------------------|------------------|----------------|------------------|----|
| 1  | 187.0866         | 94.0469         |                  |                  |                  |                  | W    |           |                  |                  |                  |                |                  | 34 |
| 2  | 302.1135         | 151.5604        |                  |                  | 284.1030         | 142.5551         | D    | 3857.7238 | 1929.3655        | 3840.6972        | 1920.8522        | 3839.7132      | 1920.3602        | 33 |
| 3  | 399.1663         | 200.0868        |                  |                  | 381.1557         | 191.0815         | P    | 3742.6968 | 1871.8520        | 3725.6703        | 1863.3388        | 3724.6863      | 1862.8468        | 32 |
| 4  | <b>528.2089</b>  | 264.6081        |                  |                  | 510.1983         | 255.6028         | E    | 3645.6441 | 1823.3257        | 3628.6175        | 1814.8124        | 3627.6335      | 1814.3204        | 31 |
| 5  | <b>627.2773</b>  | 314.1423        |                  |                  | <b>609.2667</b>  | <b>305.1370</b>  | V    | 3516.6015 | 1758.8044        | 3499.5749        | 1750.2911        | 3498.5909      | 1749.7991        | 30 |
| 6  | <b>742.3042</b>  | <b>371.6558</b> | <b>725.2777</b>  | 363.1425         | <b>724.2937</b>  | 362.6505         | N    | 3417.5330 | 1709.2702        | 3400.5065        | 1700.7569        | 3399.5225      | 1700.2649        | 29 |
| 7  | <b>902.3349</b>  | 451.6711        | 885.3083         | 443.1578         | 884.3243         | 442.6658         | C    | 3302.5061 | 1651.7567        | 3285.4796        | 1643.2434        | 3284.4955      | 1642.7514        | 28 |
| 8  | 989.3669         | <b>495.1871</b> | 972.3404         | 486.6738         | 971.3564         | 486.1818         | S    | 3142.4755 | 1571.7414        | 3125.4489        | 1563.2281        | 3124.4649      | 1562.7361        | 27 |
| 9  | 1136.4023        | 568.7048        | 1119.3758        | 560.1915         | 1118.3918        | 559.6995         | M    | 3055.4434 | 1528.2254        | 3038.4169        | 1519.7121        | 3037.4329      | 1519.2201        | 26 |
| 10 | <b>1207.4394</b> | 604.2234        | 1190.4129        | 595.7101         | 1189.4289        | 595.2181         | A    | 2908.4080 | 1454.7077        | 2891.3815        | 1446.1944        | 2890.3975      | 1445.7024        | 25 |
| 11 | <b>1336.4820</b> | <b>668.7447</b> | 1319.4555        | 660.2314         | 1318.4715        | 659.7394         | Q    | 2837.3709 | 1419.1891        | 2820.3444        | 1410.6758        | 2819.3603      | 1410.1838        | 24 |
| 12 | <b>1449.5661</b> | <b>725.2867</b> | <b>1432.5395</b> | 716.7734         | <b>1431.5555</b> | 716.2814         | I    | 2708.3283 | 1354.6678        | 2691.3018        | 1346.1545        | 2690.3178      | 1345.6625        | 23 |
| 13 | <b>1577.6247</b> | <b>789.3160</b> | 1560.5981        | 780.8027         | 1559.6141        | <b>780.3107</b>  | Q    | 2595.2443 | 1298.1258        | 2578.2177        | <b>1289.6125</b> | 2577.2337      | <b>1289.1205</b> | 22 |
| 14 | <b>1690.7087</b> | <b>845.8580</b> | 1673.6822        | 837.3447         | 1672.6982        | 836.8527         | L    | 2467.1857 | <b>1234.0965</b> | 2450.1591        | <b>1225.5832</b> | 2449.1751      | <b>1225.0912</b> | 21 |
| 15 | <b>1850.7394</b> | <b>925.8733</b> | <b>1833.7128</b> | 917.3601         | <b>1832.7288</b> | 916.8680         | C    | 2354.1016 | <b>1177.5544</b> | 2337.0751        | <b>1169.0412</b> | 2336.0910      | <b>1168.5492</b> | 20 |
| 16 | <b>1947.7922</b> | 974.3997        | 1930.7656        | 965.8864         | 1929.7816        | 965.3944         | P    | 2194.0710 | <b>1097.5391</b> | 2177.0444        | 1089.0258        | 2176.0604      | 1088.5338        | 19 |
| 17 | 2044.8449        | 1022.9261       | 2027.8184        | 1014.4128        | 2026.8343        | 1013.9208        | P    | 2097.0182 | <b>1049.0127</b> | 2079.9917        | 1040.4995        | 2079.0076      | 1040.0075        | 18 |
| 18 | 2141.8977        | 1071.4525       | 2124.8711        | <b>1062.9392</b> | 2123.8871        | 1062.4472        | P    | 1999.9654 | 1000.4864        | 1982.9389        | 991.9731         | 1981.9549      | 991.4811         | 17 |
| 19 | 2238.9504        | 1119.9789       | 2221.9239        | 1111.4656        | 2220.9399        | 1110.9736        | P    | 1902.9127 | <b>951.9600</b>  | <b>1885.8861</b> | 943.4467         | 1884.9021      | 942.9547         | 16 |
| 20 | 2367.0090        | 1184.0081       | 2349.9825        | 1175.4949        | 2348.9985        | 1175.0029        | Q    | 1805.8599 | <b>903.4336</b>  | 1788.8334        | 894.9203         | 1787.8493      | 894.4283         | 15 |
| 21 | 2480.0931        | 1240.5502       | 2463.0665        | 1232.0369        | 2462.0825        | 1231.5449        | I    | 1677.8013 | 839.4043         | 1660.7748        | 830.8910         | 1659.7908      | 830.3990         | 14 |

|    |           |                  |           |                  |           |                  |          |                 |                 |                  |                 |                  |                 |           |
|----|-----------|------------------|-----------|------------------|-----------|------------------|----------|-----------------|-----------------|------------------|-----------------|------------------|-----------------|-----------|
| 22 | 2577.1458 | <b>1289.0766</b> | 2560.1193 | 1280.5633        | 2559.1353 | 1280.0713        | <b>P</b> | 1564.7173       | <b>782.8623</b> | 1547.6907        | 774.3490        | <b>1546.7067</b> | 773.8570        | <b>13</b> |
| 23 | 2691.1888 | 1346.0980        | 2674.1622 | <b>1337.5848</b> | 2673.1782 | <b>1337.0927</b> | <b>N</b> | 1467.6645       | 734.3359        | <b>1450.6380</b> | 725.8226        | <b>1449.6539</b> | <b>725.3306</b> | <b>12</b> |
| 24 | 2778.2208 | 1389.6140        | 2761.1943 | 1381.1008        | 2760.2102 | 1380.6088        | <b>S</b> | 1353.6216       | 677.3144        | <b>1336.5950</b> | <b>668.8012</b> | <b>1335.6110</b> | <b>668.3091</b> | <b>11</b> |
| 25 | 2915.2797 | 1458.1435        | 2898.2532 | <b>1449.6302</b> | 2897.2692 | <b>1449.1382</b> | <b>H</b> | 1266.5895       | 633.7984        | <b>1249.5630</b> | 625.2851        | <b>1248.5790</b> | 624.7931        | <b>10</b> |
| 26 | 3029.3226 | 1515.1650        | 3012.2961 | 1506.6517        | 3011.3121 | 1506.1597        | <b>N</b> | 1129.5306       | <b>565.2690</b> | 1112.5041        | 556.7557        | 1111.5201        | 556.2637        | <b>9</b>  |
| 27 | 3176.3580 | 1588.6827        | 3159.3315 | 1580.1694        | 3158.3475 | 1579.6774        | <b>M</b> | 1015.4877       | 508.2475        | 998.4612         | 499.7342        | 997.4771         | 499.2422        | <b>8</b>  |
| 28 | 3277.4057 | 1639.2065        | 3260.3792 | 1630.6932        | 3259.3952 | 1630.2012        | <b>T</b> | 868.4523        | <b>434.7298</b> | 851.4258         | 426.2165        | 850.4417         | 425.7245        | <b>7</b>  |
| 29 | 3378.4534 | <b>1689.7303</b> | 3361.4269 | 1681.2171        | 3360.4428 | 1680.7251        | <b>T</b> | 767.4046        | <b>384.2060</b> | 750.3781         | 375.6927        | 749.3941         | 375.2007        | <b>6</b>  |
| 30 | 3479.5011 | <b>1740.2542</b> | 3462.4745 | 1731.7409        | 3461.4905 | 1731.2489        | <b>T</b> | 666.3570        | 333.6821        | 649.3304         | 325.1688        | 648.3464         | 324.6768        | <b>5</b>  |
| 31 | 3592.5851 | 1796.7962        | 3575.5586 | 1788.2829        | 3574.5746 | 1787.7909        | <b>L</b> | <b>565.3093</b> | 283.1583        | <b>548.2827</b>  | 274.6450        |                  |                 | <b>4</b>  |
| 32 | 3706.6281 | <b>1853.8177</b> | 3689.6015 | 1845.3044        | 3688.6175 | 1844.8124        | <b>N</b> | 452.2252        | 226.6162        | 435.1987         | 218.1030        |                  |                 | <b>3</b>  |
| 33 | 3869.6914 | 1935.3493        | 3852.6648 | 1926.8361        | 3851.6808 | 1926.3441        | <b>Y</b> | 338.1823        | 169.5948        | 321.1557         | 161.0815        |                  |                 | <b>2</b>  |
| 34 |           |                  |           |                  |           |                  | <b>R</b> | 175.1190        | 88.0631         | 158.0924         | 79.5498         |                  |                 | <b>1</b>  |

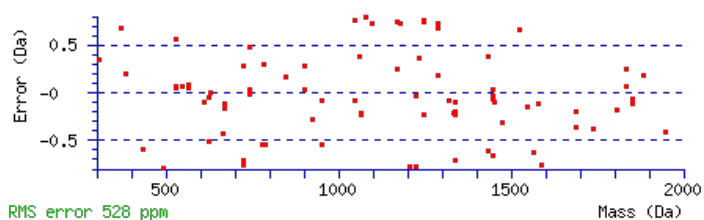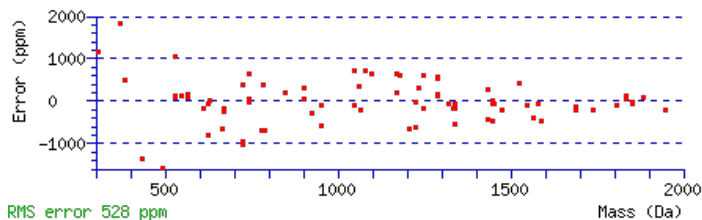

NCBI BLAST search of [WDPEVNC SMAQIQLCPPPQIPNSHNMTTTLNYR](#)

(Parameters: blastp, nr protein database, expect=20000, no filter, PAM30)

Other BLAST [web gateways](#)

All matches to this query

| Score | Mr(calc)  | Delta  | Sequence                                           | Site Analysis              |
|-------|-----------|--------|----------------------------------------------------|----------------------------|
| 35.2  | 4042.7958 | 0.0145 | <a href="#">WDPEVNC SMAQIQLCPPPQIPNSHNMTTTLNYR</a> | Deamidated N6, Q11 48.34%  |
| 33.0  | 4041.8118 | 0.9985 | <a href="#">WDPEVNC SMAQIQLCPPPQIPNSHNMTTTLNYR</a> |                            |
| 31.2  | 4042.7958 | 0.0145 | <a href="#">WDPEVNC SMAQIQLCPPPQIPNSHNMTTTLNYR</a> | Deamidated Q11, Q13 19.16% |
| 29.2  | 4041.8118 | 0.9985 | <a href="#">WDPEVNC SMAQIQLCPPPQIPNSHNMTTTLNYR</a> |                            |
| 29.0  | 4042.7958 | 0.0145 | <a href="#">WDPEVNC SMAQIQLCPPPQIPNSHNMTTTLNYR</a> | Deamidated N6, N32 11.41%  |
| 25.5  | 4041.8118 | 0.9985 | <a href="#">WDPEVNC SMAQIQLCPPPQIPNSHNMTTTLNYR</a> |                            |
| 25.4  | 4042.7958 | 0.0145 | <a href="#">WDPEVNC SMAQIQLCPPPQIPNSHNMTTTLNYR</a> | Deamidated Q13, Q20 5.00%  |
| 21.7  | 4042.7958 | 0.0145 | <a href="#">WDPEVNC SMAQIQLCPPPQIPNSHNMTTTLNYR</a> | Deamidated Q20, N23 2.13%  |
| 20.2  | 4042.7958 | 0.0145 | <a href="#">WDPEVNC SMAQIQLCPPPQIPNSHNMTTTLNYR</a> | Deamidated N23, N26 1.53%  |
| 18.6  | 4041.8118 | 0.9985 | <a href="#">WDPEVNC SMAQIQLCPPPQIPNSHNMTTTLNYR</a> |                            |

Mascot: <http://www.matrixscience.com/>



# MASCOT SCIENCE Mascot Search Results

## Peptide View

MS/MS Fragmentation of **GLNVTLSSTGR**

Found in **F5GXS0** in **con\_Xuniprot\_HUMAN3**, F5GXS0\_HUMAN Complement C4-B OS=Homo sapiens GN=C4B\_2 PE=2 SV=1

Match to Query 747: 1104.580008 from(553.297280,2+) intensity(92521.2891) rtinseconds(765) scans(1670) index(10787)

Title: 111019\_Est\_ISCardio\_NMI\_YS\_G\_7Spectrum1396\_scans\_\_1670

Data file C:\\mascot\\20140703\_Tmgf\_1D\\CSV\_UseAnalysis\\MasterCSV\\All\_Glyco\\mgf\\ptm\\UC18ERLIC\_PTM\_35D.mgf

Click mouse within plot area to zoom in by factor of two about that point

Or,  to  Da

Label all possible matches  Label matches used for scoring

Show Y-axis

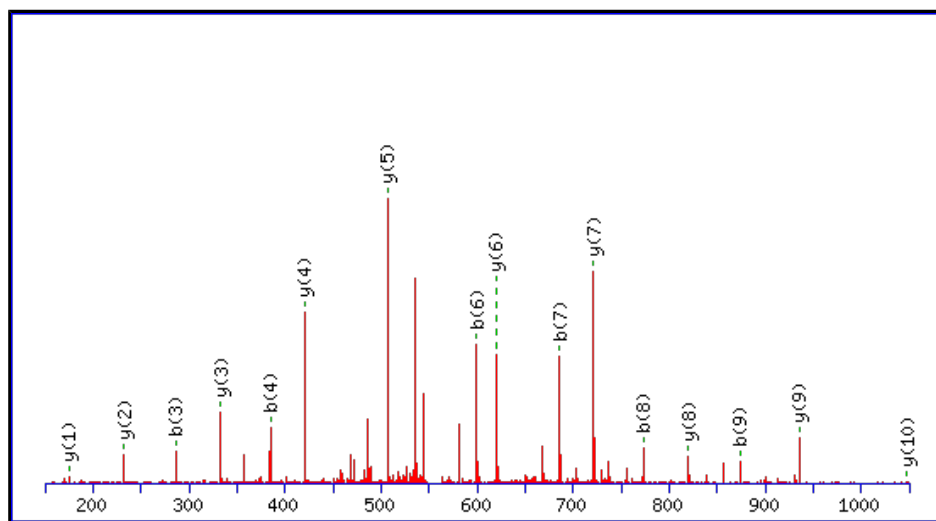

Monoisotopic mass of neutral peptide **Mr(calc):** 1104.5775

Fixed modifications: Carbamidomethyl (C) (apply to specified residues or termini only)

Variable modifications:

N3 : Deamidated (NQ)

Ions Score: 115 Expect: 7.3e-010

Matches : 16/104 fragment ions using 18 most intense peaks ([help](#))

| #  | b        | b <sup>++</sup> | b*       | b <sup>***</sup> | b <sup>0</sup> | b <sup>0++</sup> | Seq. | y         | y <sup>++</sup> | y*        | y <sup>***</sup> | y <sup>0</sup> | y <sup>0++</sup> | #  |
|----|----------|-----------------|----------|------------------|----------------|------------------|------|-----------|-----------------|-----------|------------------|----------------|------------------|----|
| 1  | 58.0287  | 29.5180         |          |                  |                |                  | G    |           |                 |           |                  |                |                  | 11 |
| 2  | 171.1128 | 86.0600         |          |                  |                |                  | L    | 1048.5633 | 524.7853        | 1031.5368 | 516.2720         | 1030.5528      | 515.7800         | 10 |
| 3  | 286.1397 | 143.5735        | 269.1132 | 135.0602         |                |                  | N    | 935.4793  | 468.2433        | 918.4527  | 459.7300         | 917.4687       | 459.2380         | 9  |
| 4  | 385.2082 | 193.1077        | 368.1816 | 184.5944         |                |                  | V    | 820.4523  | 410.7298        | 803.4258  | 402.2165         | 802.4417       | 401.7245         | 8  |
| 5  | 486.2558 | 243.6316        | 469.2293 | 235.1183         | 468.2453       | 234.6263         | T    | 721.3839  | 361.1956        | 704.3573  | 352.6823         | 703.3733       | 352.1903         | 7  |
| 6  | 599.3399 | 300.1736        | 582.3134 | 291.6603         | 581.3293       | 291.1683         | L    | 620.3362  | 310.6717        | 603.3097  | 302.1585         | 602.3257       | 301.6665         | 6  |
| 7  | 686.3719 | 343.6896        | 669.3454 | 335.1763         | 668.3614       | 334.6843         | S    | 507.2522  | 254.1297        | 490.2256  | 245.6164         | 489.2416       | 245.1244         | 5  |
| 8  | 773.4040 | 387.2056        | 756.3774 | 378.6923         | 755.3934       | 378.2003         | S    | 420.2201  | 210.6137        | 403.1936  | 202.1004         | 402.2096       | 201.6084         | 4  |
| 9  | 874.4516 | 437.7295        | 857.4251 | 429.2162         | 856.4411       | 428.7242         | T    | 333.1881  | 167.0977        | 316.1615  | 158.5844         | 315.1775       | 158.0924         | 3  |
| 10 | 931.4731 | 466.2402        | 914.4466 | 457.7269         | 913.4625       | 457.2349         | G    | 232.1404  | 116.5738        | 215.1139  | 108.0606         |                |                  | 2  |
| 11 |          |                 |          |                  |                |                  | R    | 175.1190  | 88.0631         | 158.0924  | 79.5498          |                |                  | 1  |

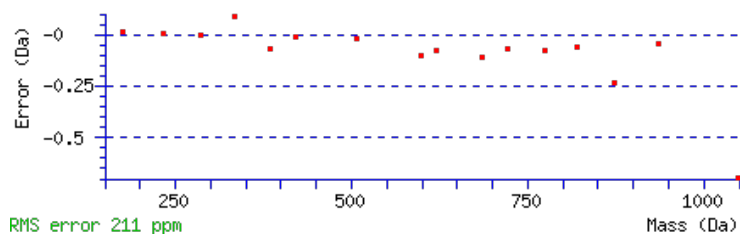

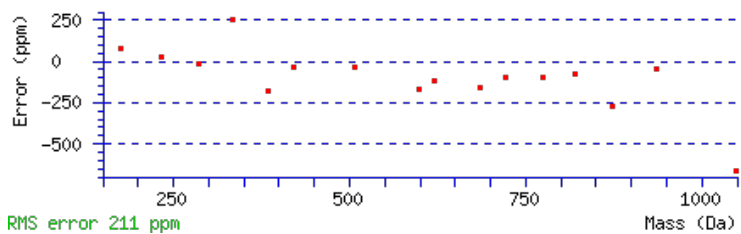

NCBI **BLAST** search of [GLNVTLSSTGR](#)

(Parameters: blastp, nr protein database, expect=20000, no filter, PAM30)

Other BLAST [web gateways](#)

**All matches to this query**

| Score | Mr(calc)  | Delta  | Sequence                    |
|-------|-----------|--------|-----------------------------|
| 115.0 | 1104.5775 | 0.0025 | <a href="#">GLNVTLSSTGR</a> |
| 14.1  | 1104.5750 | 0.0050 | <a href="#">SMGLPLQFGR</a>  |
| 10.9  | 1103.5724 | 1.0077 | <a href="#">FVHTSKTER</a>   |
| 10.6  | 1104.5788 | 0.0012 | <a href="#">QHQLHSSR</a>    |
| 10.6  | 1104.5788 | 0.0012 | <a href="#">QHQLHSSR</a>    |
| 10.0  | 1104.5775 | 0.0025 | <a href="#">GTSSLTVNLGR</a> |
| 8.9   | 1103.5757 | 1.0043 | <a href="#">OTKVIDMGGR</a>  |
| 7.2   | 1103.5822 | 0.9978 | <a href="#">QLNTLLSTGR</a>  |
| 6.9   | 1104.5775 | 0.0025 | <a href="#">GLDIESTSKR</a>  |
| 5.4   | 1103.5757 | 1.0043 | <a href="#">NAVARACLK</a>   |

Mascot: <http://www.matrixscience.com/>

# MASCOT SCIENCE Mascot Search Results

## Peptide View

MS/MS Fragmentation of **FSDGLESNSSTQFEVK**

Found in **F5GXS0** in **con\_Xuniprot\_HUMAN3**, F5GXS0\_HUMAN Complement C4-B OS=Homo sapiens GN=C4B\_2 PE=2 SV=1

Match to Query 10011: 1774.797888 from(888.406220,2+) intensity(25752.5645) rtinseconds(1176) scans(2598) index(736)

Title: 111019\_Est\_ISCardio\_NMI\_YP\_G\_2Spectrum2219\_scans\_\_2598

Data file C:\\mascot\\20140703\_Tmgf\_1D\\CSV\_UseAnalysis\\MasterCSV\\All\_Glyco\\mgf\\ptm\\UC18ERLIC\_PTM\_35D.mgf

Click mouse within plot area to zoom in by factor of two about that point

Or, to Da

Label all possible matches Label matches used for scoring

Show Y-axis

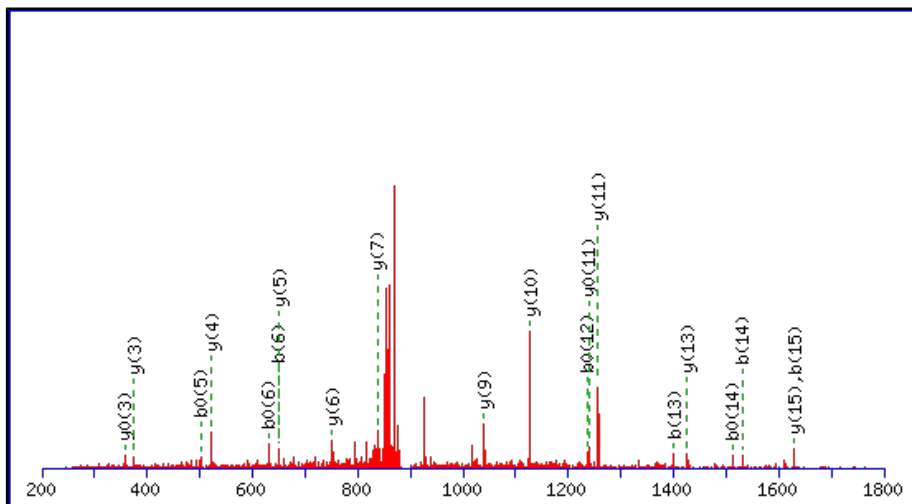

Monoisotopic mass of neutral peptide  $M_r(\text{calc})$ : 1774.7897

Fixed modifications: Carbamidomethyl (C) (apply to specified residues or termini only)

Variable modifications:

N8 : Deamidated (NQ)

Ions Score: 74 Expect: 5.8e-006

Matches : 20/160 fragment ions using 31 most intense peaks ([help](#))

| #  | b         | b <sup>++</sup> | b <sup>*</sup> | b <sup>*++</sup> | b <sup>0</sup> | b <sup>0++</sup> | Seq. | y         | y <sup>++</sup> | y <sup>*</sup> | y <sup>*++</sup> | y <sup>0</sup> | y <sup>0++</sup> | #  |
|----|-----------|-----------------|----------------|------------------|----------------|------------------|------|-----------|-----------------|----------------|------------------|----------------|------------------|----|
| 1  | 148.0757  | 74.5415         |                |                  |                |                  | F    |           |                 |                |                  |                |                  | 16 |
| 2  | 235.1077  | 118.0575        |                |                  | 217.0972       | 109.0522         | S    | 1628.7286 | 814.8679        | 1611.7021      | 806.3547         | 1610.7180      | 805.8627         | 15 |
| 3  | 350.1347  | 175.5710        |                |                  | 332.1241       | 166.5657         | D    | 1541.6966 | 771.3519        | 1524.6700      | 762.8387         | 1523.6860      | 762.3466         | 14 |
| 4  | 407.1561  | 204.0817        |                |                  | 389.1456       | 195.0764         | G    | 1426.6696 | 713.8385        | 1409.6431      | 705.3252         | 1408.6591      | 704.8332         | 13 |
| 5  | 520.2402  | 260.6237        |                |                  | 502.2296       | 251.6185         | L    | 1369.6482 | 685.3277        | 1352.6216      | 676.8144         | 1351.6376      | 676.3224         | 12 |
| 6  | 649.2828  | 325.1450        |                |                  | 631.2722       | 316.1397         | E    | 1256.5641 | 628.7857        | 1239.5376      | 620.2724         | 1238.5535      | 619.7804         | 11 |
| 7  | 736.3148  | 368.6610        |                |                  | 718.3042       | 359.6558         | S    | 1127.5215 | 564.2644        | 1110.4950      | 555.7511         | 1109.5109      | 555.2591         | 10 |
| 8  | 851.3418  | 426.1745        | 834.3152       | 417.6612         | 833.3312       | 417.1692         | N    | 1040.4895 | 520.7484        | 1023.4629      | 512.2351         | 1022.4789      | 511.7431         | 9  |
| 9  | 938.3738  | 469.6905        | 921.3472       | 461.1773         | 920.3632       | 460.6852         | S    | 925.4625  | 463.2349        | 908.4360       | 454.7216         | 907.4520       | 454.2296         | 8  |
| 10 | 1025.4058 | 513.2065        | 1008.3793      | 504.6933         | 1007.3952      | 504.2013         | S    | 838.4305  | 419.7189        | 821.4040       | 411.2056         | 820.4199       | 410.7136         | 7  |
| 11 | 1126.4535 | 563.7304        | 1109.4269      | 555.2171         | 1108.4429      | 554.7251         | T    | 751.3985  | 376.2029        | 734.3719       | 367.6896         | 733.3879       | 367.1976         | 6  |
| 12 | 1254.5121 | 627.7597        | 1237.4855      | 619.2464         | 1236.5015      | 618.7544         | Q    | 650.3508  | 325.6790        | 633.3243       | 317.1658         | 632.3402       | 316.6738         | 5  |
| 13 | 1401.5805 | 701.2939        | 1384.5539      | 692.7806         | 1383.5699      | 692.2886         | F    | 522.2922  | 261.6498        | 505.2657       | 253.1365         | 504.2817       | 252.6445         | 4  |
| 14 | 1530.6231 | 765.8152        | 1513.5965      | 757.3019         | 1512.6125      | 756.8099         | E    | 375.2238  | 188.1155        | 358.1973       | 179.6023         | 357.2132       | 179.1103         | 3  |
| 15 | 1629.6915 | 815.3494        | 1612.6649      | 806.8361         | 1611.6809      | 806.3441         | V    | 246.1812  | 123.5942        | 229.1547       | 115.0810         |                |                  | 2  |
| 16 |           |                 |                |                  |                |                  | K    | 147.1128  | 74.0600         | 130.0863       | 65.5468          |                |                  | 1  |

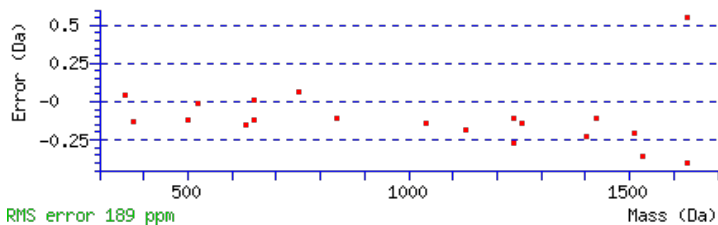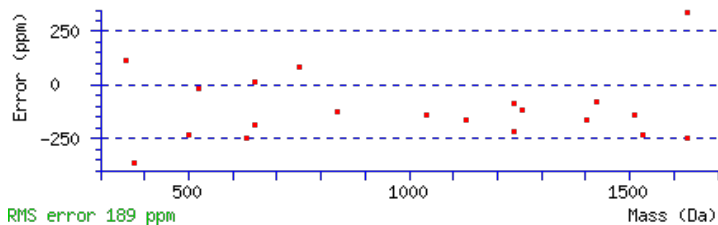

NCBI BLAST search of [FSDGLESNSSTQFEVK](#)

(Parameters: blastp, nr protein database, expect=20000, no filter, PAM30)

Other BLAST [web gateways](#)

**All matches to this query**

| Score | Mr(calc)  | Delta   | Sequence                         | Site Analysis        |
|-------|-----------|---------|----------------------------------|----------------------|
| 73.8  | 1774.7897 | 0.0082  | <a href="#">FSDGLESNSSTQFEVK</a> | Deamidated N8 99.97% |
| 38.2  | 1774.7897 | 0.0082  | <a href="#">FSDGLESNSSTQFEVK</a> | Deamidated Q12 0.03% |
| 6.0   | 1772.7848 | 2.0131  | <a href="#">KVMEYMAQEEEEELK</a>  |                      |
| 5.9   | 1773.7887 | 1.0092  | <a href="#">DQTRPPCGQSRCPSK</a>  |                      |
| 5.4   | 1773.7913 | 1.0066  | <a href="#">TGSAAMEQLMTDLFSR</a> |                      |
| 3.9   | 1774.8043 | -0.0064 | <a href="#">QEDQQLDIQVMAEAR</a>  |                      |
| 3.4   | 1774.7940 | 0.0039  | <a href="#">LMKMEESTGVQFCAK</a>  |                      |
| 3.4   | 1774.7940 | 0.0039  | <a href="#">LMKMEESTGVQFCAK</a>  |                      |
| 3.0   | 1774.8057 | -0.0078 | <a href="#">NCFPTATNTNHKNGAK</a> |                      |
| 2.7   | 1773.7887 | 1.0092  | <a href="#">DQTRPPCGQSRCPSK</a>  |                      |

Mascot: <http://www.matrixscience.com/>

# MATRIX SCIENCE Mascot Search Results

## Peptide View

MS/MS Fragmentation of **GLNVTLSSTGRNGFK**

Found in **F5GXS0** in **con\_Xuniprot\_HUMAN3**, F5GXS0\_HUMAN Complement C4-B OS=Homo sapiens GN=C4B\_2 PE=2 SV=1

Match to Query 7008: 1551.794748 from(776.904650,2+) intensity(60743.7969) rtinseconds(1027) scans(2423) index(2565)

Title: 111019\_Est\_ISCardio\_NMI\_YP\_G\_5Spectrum2054\_scans\_\_2423

Data file C:\\mascot\\20140703\_Tmgf\_1D\\CSV\_UseAnalysis\\MasterCSV\\All\_Glyco\\mgf\\ptm\\UC18ERLIC\_PTM\_35D.mgf

Click mouse within plot area to zoom in by factor of two about that point

Or, to Da

Label all possible matches Label matches used for scoring

Show Y-axis

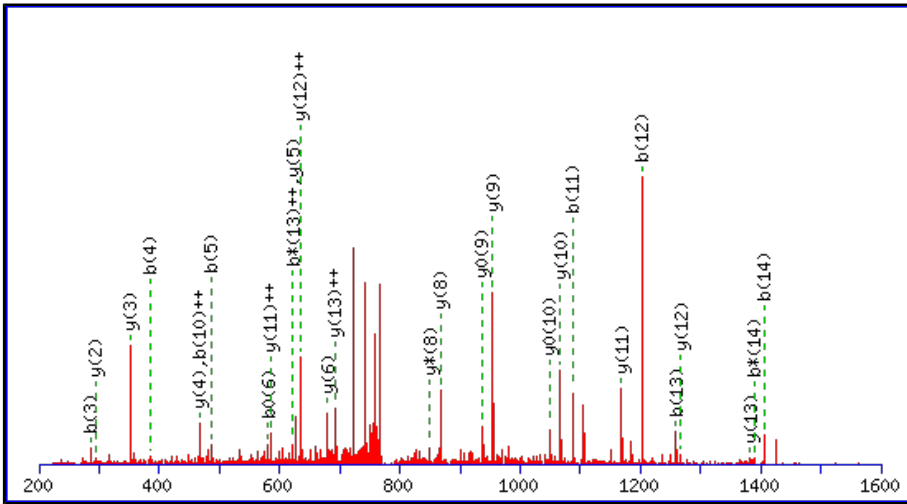

Monoisotopic mass of neutral peptide Mr(calc): 1551.7893

Fixed modifications: Carbamidomethyl (C) (apply to specified residues or termini only)

Variable modifications:

N3 : Deamidated (NQ)

N12 : Deamidated (NQ)

Ions Score: 70 Expect: 2.3e-005

Matches : 28/144 fragment ions using 53 most intense peaks ([help](#))

| #  | b                | b <sup>++</sup> | b <sup>*</sup>   | b <sup>*++</sup> | b <sup>0</sup>  | b <sup>0++</sup> | Seq.     | y                | y <sup>++</sup> | y <sup>*</sup>  | y <sup>*++</sup> | y <sup>0</sup>   | y <sup>0++</sup> | #  |
|----|------------------|-----------------|------------------|------------------|-----------------|------------------|----------|------------------|-----------------|-----------------|------------------|------------------|------------------|----|
| 1  | 58.0287          | 29.5180         |                  |                  |                 |                  | <b>G</b> |                  |                 |                 |                  |                  |                  | 15 |
| 2  | 171.1128         | 86.0600         |                  |                  |                 |                  | <b>L</b> | 1495.7751        | 748.3912        | 1478.7486       | 739.8779         | 1477.7645        | 739.3859         | 14 |
| 3  | <b>286.1397</b>  | 143.5735        | 269.1132         | 135.0602         |                 |                  | <b>N</b> | <b>1382.6910</b> | <b>691.8492</b> | 1365.6645       | 683.3359         | 1364.6805        | 682.8439         | 13 |
| 4  | <b>385.2082</b>  | 193.1077        | 368.1816         | 184.5944         |                 |                  | <b>V</b> | <b>1267.6641</b> | <b>634.3357</b> | 1250.6375       | 625.8224         | 1249.6535        | 625.3304         | 12 |
| 5  | <b>486.2558</b>  | 243.6316        | 469.2293         | 235.1183         | 468.2453        | 234.6263         | <b>T</b> | <b>1168.5957</b> | <b>584.8015</b> | 1151.5691       | 576.2882         | 1150.5851        | 575.7962         | 11 |
| 6  | 599.3399         | 300.1736        | 582.3134         | 291.6603         | <b>581.3293</b> | 291.1683         | <b>L</b> | <b>1067.5480</b> | 534.2776        | 1050.5215       | 525.7644         | <b>1049.5374</b> | 525.2724         | 10 |
| 7  | 686.3719         | 343.6896        | 669.3454         | 335.1763         | 668.3614        | 334.6843         | <b>S</b> | <b>954.4639</b>  | 477.7356        | 937.4374        | 469.2223         | <b>936.4534</b>  | 468.7303         | 9  |
| 8  | 773.4040         | 387.2056        | 756.3774         | 378.6923         | 755.3934        | 378.2003         | <b>S</b> | <b>867.4319</b>  | 434.2196        | <b>850.4054</b> | 425.7063         | 849.4213         | 425.2143         | 8  |
| 9  | 874.4516         | 437.7295        | 857.4251         | 429.2162         | 856.4411        | 428.7242         | <b>T</b> | 780.3999         | 390.7036        | 763.3733        | 382.1903         | 762.3893         | 381.6983         | 7  |
| 10 | 931.4731         | <b>466.2402</b> | 914.4466         | 457.7269         | 913.4625        | 457.2349         | <b>G</b> | <b>679.3522</b>  | 340.1797        | 662.3257        | 331.6665         |                  |                  | 6  |
| 11 | <b>1087.5742</b> | 544.2907        | 1070.5477        | 535.7775         | 1069.5636       | 535.2855         | <b>R</b> | <b>622.3307</b>  | 311.6690        | 605.3042        | 303.1557         |                  |                  | 5  |
| 12 | <b>1202.6012</b> | 601.8042        | 1185.5746        | 593.2909         | 1184.5906       | 592.7989         | <b>N</b> | <b>466.2296</b>  | 233.6185        | 449.2031        | 225.1052         |                  |                  | 4  |
| 13 | <b>1259.6226</b> | 630.3149        | 1242.5961        | <b>621.8017</b>  | 1241.6121       | 621.3097         | <b>G</b> | <b>351.2027</b>  | 176.1050        | 334.1761        | 167.5917         |                  |                  | 3  |
| 14 | <b>1406.6910</b> | 703.8492        | <b>1389.6645</b> | 695.3359         | 1388.6805       | 694.8439         | <b>F</b> | <b>294.1812</b>  | 147.5942        | 277.1547        | 139.0810         |                  |                  | 2  |
| 15 |                  |                 |                  |                  |                 |                  | <b>K</b> | 147.1128         | 74.0600         | 130.0863        | 65.5468          |                  |                  | 1  |

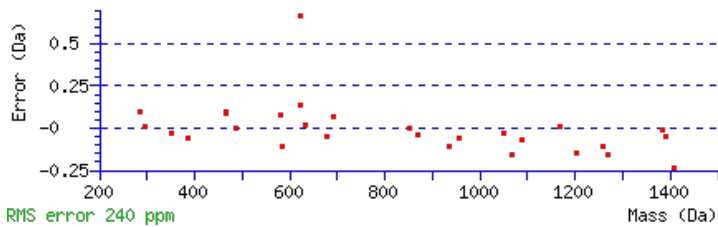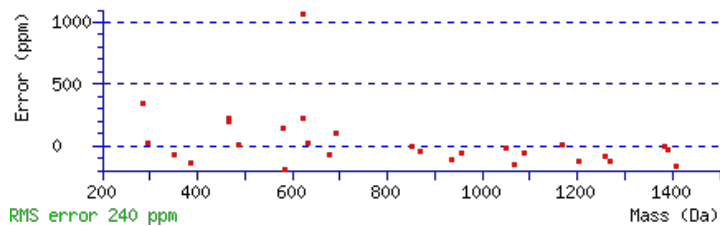

NCBI BLAST search of [GLNVTLSSTGRNGFK](#)

(Parameters: blastp, nr protein database, expect=20000, no filter, PAM30)

Other BLAST [web gateways](#)

**All matches to this query**

| Score | Mr(calc)  | Delta   | Sequence                        |
|-------|-----------|---------|---------------------------------|
| 69.8  | 1551.7893 | 0.0055  | <a href="#">GLNVTLSSTGRNGFK</a> |
| 5.2   | 1551.7893 | 0.0055  | <a href="#">QRETAVTSEQKFK</a>   |
| 5.0   | 1551.7926 | 0.0021  | <a href="#">NRITLMSQSSTGKK</a>  |
| 2.1   | 1550.7861 | 1.0086  | <a href="#">LLEESEKSSTGLMK</a>  |
| 2.0   | 1551.7966 | -0.0019 | <a href="#">LNEKLSIDMAQFK</a>   |
| 1.9   | 1551.8005 | -0.0057 | <a href="#">AEREKPKHTEAK</a>    |
| 1.9   | 1551.7901 | 0.0046  | <a href="#">REAFQQLQLMK</a>     |
| 0.6   | 1551.7980 | -0.0033 | <a href="#">ARSFCKTHASLEK</a>   |

Mascot: <http://www.matrixscience.com/>

# MASCOT SCIENCE Mascot Search Results

## Peptide View

MS/MS Fragmentation of **LANLTQGEDQYYLR**

Found in **H0YAS8** in **con\_Xuniprot\_HUMAN3**, H0YAS8\_HUMAN Clusterin beta chain (Fragment) OS=Homo sapiens GN=CLU PE=4 SV=1

Match to Query 8590: 1683.817568 from(842.916060,2+) intensity(430116.6875) rtinseconds(1379) scans(3367) index(26593)

Title: 111019\_Est\_MI\_YS\_G\_09Spectrum2906\_scans\_\_3367

Data file C:\\mascot\\20140703\_Tmgf\_1D\\CSV\_UseAnalysis\\MasterCSV\\All\_Glyco\\mgf\\ptm\\UC18ERLIC\_PTM\_35D.mgf

Click mouse within plot area to zoom in by factor of two about that point

Or, to Da

Label all possible matches Label matches used for scoring

Show Y-axis

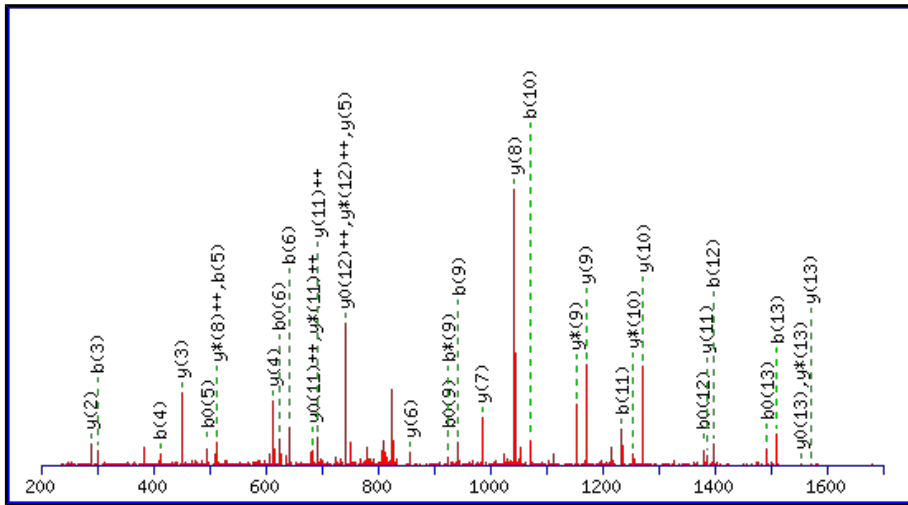

Monoisotopic mass of neutral peptide  $M_r(\text{calc})$ : 1683.8104

Fixed modifications: Carbamidomethyl (C) (apply to specified residues or termini only)

Variable modifications:

N3 : Deamidated (NQ)

Ions Score: 89 Expect: 2.7e-007

Matches : 36/134 fragment ions using 43 most intense peaks ([help](#))

| #  | b         | b <sup>++</sup> | b <sup>*</sup> | b <sup>***</sup> | b <sup>0</sup> | b <sup>0++</sup> | Seq. | y         | y <sup>++</sup> | y <sup>*</sup> | y <sup>***</sup> | y <sup>0</sup> | y <sup>0++</sup> | #  |
|----|-----------|-----------------|----------------|------------------|----------------|------------------|------|-----------|-----------------|----------------|------------------|----------------|------------------|----|
| 1  | 114.0913  | 57.5493         |                |                  |                |                  | L    |           |                 |                |                  |                |                  | 14 |
| 2  | 185.1285  | 93.0679         |                |                  |                |                  | A    | 1571.7336 | 786.3705        | 1554.7071      | 777.8572         | 1553.7231      | 777.3652         | 13 |
| 3  | 300.1554  | 150.5813        | 283.1288       | 142.0681         |                |                  | N    | 1500.6965 | 750.8519        | 1483.6700      | 742.3386         | 1482.6860      | 741.8466         | 12 |
| 4  | 413.2395  | 207.1234        | 396.2129       | 198.6101         |                |                  | L    | 1385.6696 | 693.3384        | 1368.6430      | 684.8252         | 1367.6590      | 684.3331         | 11 |
| 5  | 514.2871  | 257.6472        | 497.2606       | 249.1339         | 496.2766       | 248.6419         | T    | 1272.5855 | 636.7964        | 1255.5590      | 628.2831         | 1254.5749      | 627.7911         | 10 |
| 6  | 642.3457  | 321.6765        | 625.3192       | 313.1632         | 624.3352       | 312.6712         | Q    | 1171.5378 | 586.2726        | 1154.5113      | 577.7593         | 1153.5273      | 577.2673         | 9  |
| 7  | 699.3672  | 350.1872        | 682.3406       | 341.6740         | 681.3566       | 341.1819         | G    | 1043.4793 | 522.2433        | 1026.4527      | 513.7300         | 1025.4687      | 513.2380         | 8  |
| 8  | 828.4098  | 414.7085        | 811.3832       | 406.1953         | 810.3992       | 405.7032         | E    | 986.4578  | 493.7325        | 969.4312       | 485.2193         | 968.4472       | 484.7272         | 7  |
| 9  | 943.4367  | 472.2220        | 926.4102       | 463.7087         | 925.4262       | 463.2167         | D    | 857.4152  | 429.2112        | 840.3886       | 420.6980         | 839.4046       | 420.2060         | 6  |
| 10 | 1071.4953 | 536.2513        | 1054.4687      | 527.7380         | 1053.4847      | 527.2460         | Q    | 742.3883  | 371.6978        | 725.3617       | 363.1845         |                |                  | 5  |
| 11 | 1234.5586 | 617.7830        | 1217.5321      | 609.2697         | 1216.5481      | 608.7777         | Y    | 614.3297  | 307.6685        | 597.3031       | 299.1552         |                |                  | 4  |
| 12 | 1397.6220 | 699.3146        | 1380.5954      | 690.8013         | 1379.6114      | 690.3093         | Y    | 451.2663  | 226.1368        | 434.2398       | 217.6235         |                |                  | 3  |
| 13 | 1510.7060 | 755.8566        | 1493.6795      | 747.3434         | 1492.6955      | 746.8514         | L    | 288.2030  | 144.6051        | 271.1765       | 136.0919         |                |                  | 2  |
| 14 |           |                 |                |                  |                |                  | R    | 175.1190  | 88.0631         | 158.0924       | 79.5498          |                |                  | 1  |



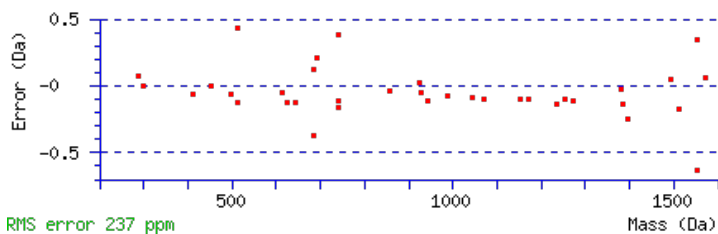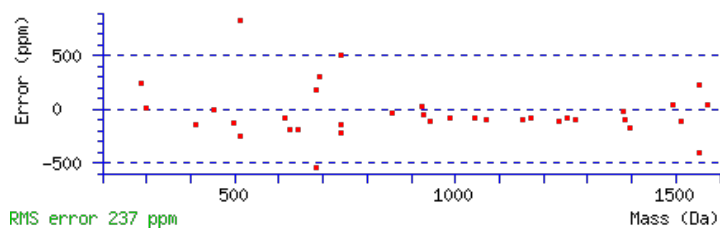

NCBI **BLAST** search of [LANLTQGEDQYYLR](#)

(Parameters: blastp, nr protein database, expect=20000, no filter, PAM30)

Other BLAST [web gateways](#)

**All matches to this query**

| Score | Mr(calc)  | Delta   | Sequence                        | Site Analysis        |
|-------|-----------|---------|---------------------------------|----------------------|
| 88.7  | 1683.8104 | 0.0072  | <a href="#">LANLTQGEDQYYLR</a>  | Deamidated N3 97.41% |
| 72.8  | 1683.8104 | 0.0072  | <a href="#">LANLTQGEDQYYLR</a>  | Deamidated Q6 2.50%  |
| 58.0  | 1683.8104 | 0.0072  | <a href="#">LANLTQGEDQYYLR</a>  | Deamidated Q10 0.08% |
| 6.9   | 1683.8104 | 0.0071  | <a href="#">DVSPPSTWSVDQPIR</a> |                      |
| 6.7   | 1683.8216 | -0.0041 | <a href="#">HAPGSEQTVTYEPLR</a> |                      |
| 6.6   | 1683.8178 | -0.0002 | <a href="#">IGEDVDLFDKQFK</a>   |                      |
| 6.6   | 1683.8178 | -0.0002 | <a href="#">LGEDVDLFDKQFK</a>   |                      |
| 5.3   | 1683.8113 | 0.0063  | <a href="#">ETPGFQLLGMVCLR</a>  |                      |
| 3.0   | 1683.8185 | -0.0009 | <a href="#">MRDAGDPSPPNKMLR</a> |                      |
| 3.0   | 1681.8159 | 2.0017  | <a href="#">TANDTSTEAYNLLLR</a> |                      |

Mascot: <http://www.matrixscience.com/>

# MASCOT SCIENCE Mascot Search Results

## Peptide View

MS/MS Fragmentation of **LANLTQGEDQYYLR**

Found in **H0YAS8** in **con\_Xuniprot\_HUMAN3**, H0YAS8\_HUMAN Clusterin beta chain (Fragment) OS=Homo sapiens GN=CLU PE=4 SV=1

Match to Query 8611: 1684.793888 from(843.404220,2+) intensity(33906.6406) rtinseconds(1418) scans(3375) index(20265)

Title: 111019\_Est\_MI\_YP\_G\_10Spectrum2941\_scans\_3375

Data file C:\\mascot\\20140703\_Tmgf\_1D\\CSV\_UseAnalysis\\MasterCSV\\All\_Glyco\\mgf\\ptm\\UC18ERLIC\_PTM\_35D.mgf

Click mouse within plot area to zoom in by factor of two about that point

Or, to Da

Label all possible matches Label matches used for scoring

Show Y-axis

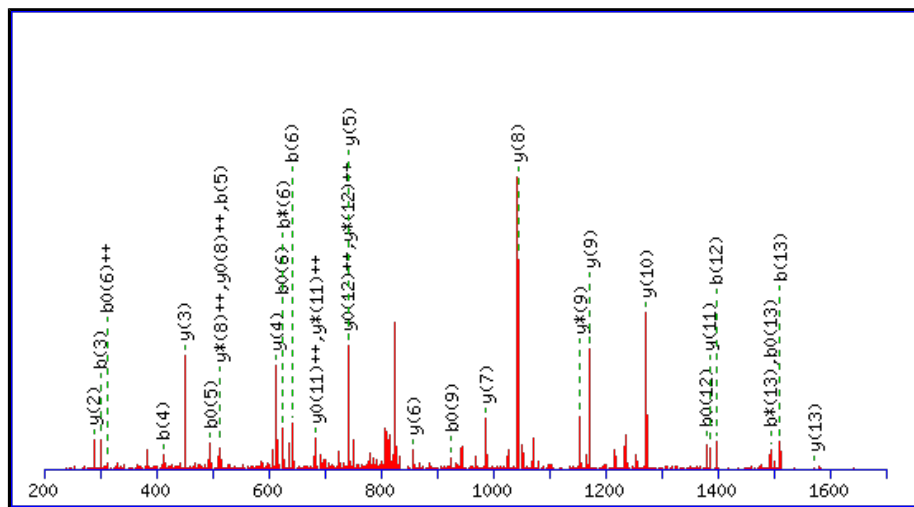

Monoisotopic mass of neutral peptide Mr(calc): 1684.7944

Fixed modifications: Carbamidomethyl (C) (apply to specified residues or termini only)

Variable modifications:

N3 : Deamidated (NQ)

Q10 : Deamidated (NQ)

Ions Score: 79 Expect: 2e-006

Matches : 32/134 fragment ions using 43 most intense peaks (help)

| #  | b         | b <sup>++</sup> | b*        | b <sup>+++</sup> | b <sup>0</sup> | b <sup>0++</sup> | Seq. | y         | y <sup>++</sup> | y*        | y <sup>+++</sup> | y <sup>0</sup> | y <sup>0++</sup> | #  |
|----|-----------|-----------------|-----------|------------------|----------------|------------------|------|-----------|-----------------|-----------|------------------|----------------|------------------|----|
| 1  | 114.0913  | 57.5493         |           |                  |                |                  | L    |           |                 |           |                  |                |                  | 14 |
| 2  | 185.1285  | 93.0679         |           |                  |                |                  | A    | 1572.7176 | 786.8625        | 1555.6911 | 778.3492         | 1554.7071      | 777.8572         | 13 |
| 3  | 300.1554  | 150.5813        | 283.1288  | 142.0681         |                |                  | N    | 1501.6805 | 751.3439        | 1484.6540 | 742.8306         | 1483.6700      | 742.3386         | 12 |
| 4  | 413.2395  | 207.1234        | 396.2129  | 198.6101         |                |                  | L    | 1386.6536 | 693.8304        | 1369.6270 | 685.3172         | 1368.6430      | 684.8252         | 11 |
| 5  | 514.2871  | 257.6472        | 497.2606  | 249.1339         | 496.2766       | 248.6419         | T    | 1273.5695 | 637.2884        | 1256.5430 | 628.7751         | 1255.5590      | 628.2831         | 10 |
| 6  | 642.3457  | 321.6765        | 625.3192  | 313.1632         | 624.3352       | 312.6712         | Q    | 1172.5218 | 586.7646        | 1155.4953 | 578.2513         | 1154.5113      | 577.7593         | 9  |
| 7  | 699.3672  | 350.1872        | 682.3406  | 341.6740         | 681.3566       | 341.1819         | G    | 1044.4633 | 522.7353        | 1027.4367 | 514.2220         | 1026.4527      | 513.7300         | 8  |
| 8  | 828.4098  | 414.7085        | 811.3832  | 406.1953         | 810.3992       | 405.7032         | E    | 987.4418  | 494.2245        | 970.4153  | 485.7113         | 969.4312       | 485.2193         | 7  |
| 9  | 943.4367  | 472.2220        | 926.4102  | 463.7087         | 925.4262       | 463.2167         | D    | 858.3992  | 429.7032        | 841.3727  | 421.1900         | 840.3886       | 420.6980         | 6  |
| 10 | 1072.4793 | 536.7433        | 1055.4528 | 528.2300         | 1054.4687      | 527.7380         | Q    | 743.3723  | 372.1898        | 726.3457  | 363.6765         |                |                  | 5  |
| 11 | 1235.5426 | 618.2750        | 1218.5161 | 609.7617         | 1217.5321      | 609.2697         | Y    | 614.3297  | 307.6685        | 597.3031  | 299.1552         |                |                  | 4  |
| 12 | 1398.6060 | 699.8066        | 1381.5794 | 691.2933         | 1380.5954      | 690.8013         | Y    | 451.2663  | 226.1368        | 434.2398  | 217.6235         |                |                  | 3  |
| 13 | 1511.6900 | 756.3487        | 1494.6635 | 747.8354         | 1493.6795      | 747.3434         | L    | 288.2030  | 144.6051        | 271.1765  | 136.0919         |                |                  | 2  |
| 14 |           |                 |           |                  |                |                  | R    | 175.1190  | 88.0631         | 158.0924  | 79.5498          |                |                  | 1  |

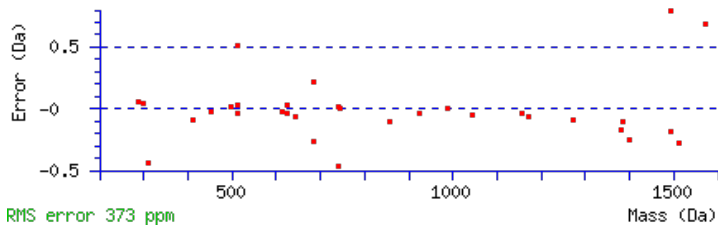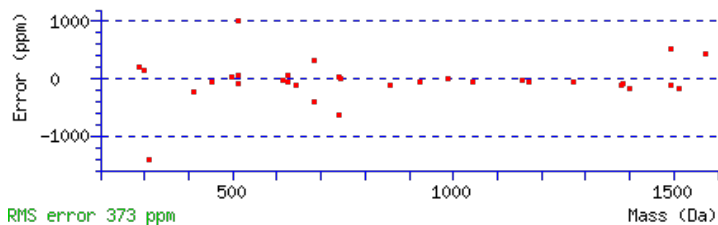

NCBI BLAST search of [LANLTQGEDQYYLR](#)

(Parameters: blastp, nr protein database, expect=20000, no filter, PAM30)

Other BLAST [web gateways](#)

**All matches to this query**

| Score | Mr(calc)  | Delta   | Sequence                         | Site Analysis             |
|-------|-----------|---------|----------------------------------|---------------------------|
| 79.5  | 1684.7944 | -0.0005 | <a href="#">LANLTQGEDQYYLR</a>   | Deamidated N3, Q10 68.61% |
| 75.9  | 1684.7944 | -0.0005 | <a href="#">LANLTQGEDQYYLR</a>   | Deamidated N3, Q6 30.23%  |
| 61.8  | 1684.7944 | -0.0005 | <a href="#">LANLTQGEDQYYLR</a>   | Deamidated Q6, Q10 1.17%  |
| 9.1   | 1683.7965 | 0.9974  | <a href="#">TLVWNASVNGHTGGNR</a> |                           |
| 6.7   | 1684.7978 | -0.0039 | <a href="#">LGQLETNMETLYTR</a>   |                           |
| 4.2   | 1684.7917 | 0.0021  | <a href="#">GQHQVSPHLGQPGADR</a> |                           |
| 3.5   | 1684.8025 | -0.0086 | <a href="#">MRDAGDPSPPNKMLR</a>  |                           |
| 2.8   | 1684.8018 | -0.0079 | <a href="#">IGEDVDLFDKQFK</a>    |                           |
| 2.8   | 1684.8018 | -0.0079 | <a href="#">LGEDVDLFDKQFK</a>    |                           |
| 2.4   | 1684.7912 | 0.0027  | <a href="#">KCKPQMNYDKLSR</a>    |                           |

Mascot: <http://www.matrixscience.com/>

# MASCOT SCIENCE Mascot Search Results

## Peptide View

MS/MS Fragmentation of **LANLTQGEDQYYLR**

Found in **H0YAS8** in **con\_Xuniprot\_HUMAN3**, H0YAS8\_HUMAN Clusterin beta chain (Fragment) OS=Homo sapiens GN=CLU PE=4 SV=1

Match to Query 8615: 1684.795828 from(843.405190,2+) intensity(83411.5313) rtinseconds(1465) scans(3483) index(27408)

Title: 111019\_Est\_MI\_YS\_G\_10Spectrum2992\_scans\_3483

Data file C:\mascot\20140703\_Tmgf\_1D\CSV\_UseAnalysis\MasterCSV\All\_Glyco\mgf\ptm\UC18ERLIC\_PTM\_35D.mgf

Click mouse within plot area to zoom in by factor of two about that point

Or, to Da

Label all possible matches Label matches used for scoring

Show Y-axis

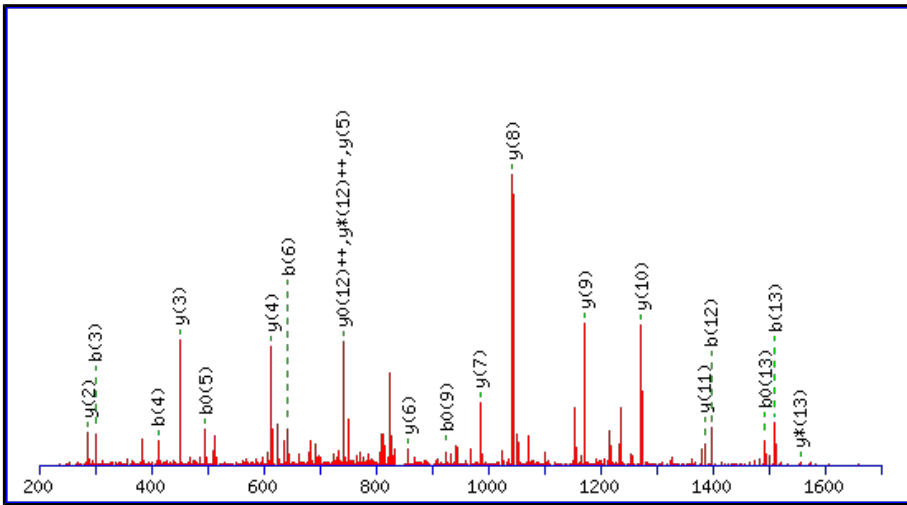

Monoisotopic mass of neutral peptide Mr(calc): 1684.7944

Fixed modifications: Carbamidomethyl (C) (apply to specified residues or termini only)

Variable modifications:

N3 : Deamidated (NQ)

Q6 : Deamidated (NQ)

Ions Score: 74 Expect: 7.8e-006

Matches : 21/134 fragment ions using 29 most intense peaks ([help](#))

| #  | b         | b <sup>++</sup> | b <sup>*</sup> | b <sup>***</sup> | b <sup>0</sup> | b <sup>0++</sup> | Seq. | y         | y <sup>++</sup> | y <sup>*</sup> | y <sup>***</sup> | y <sup>0</sup> | y <sup>0++</sup> | #  |
|----|-----------|-----------------|----------------|------------------|----------------|------------------|------|-----------|-----------------|----------------|------------------|----------------|------------------|----|
| 1  | 114.0913  | 57.5493         |                |                  |                |                  | L    |           |                 |                |                  |                |                  | 14 |
| 2  | 185.1285  | 93.0679         |                |                  |                |                  | A    | 1572.7176 | 786.8625        | 1555.6911      | 778.3492         | 1554.7071      | 777.8572         | 13 |
| 3  | 300.1554  | 150.5813        | 283.1288       | 142.0681         |                |                  | N    | 1501.6805 | 751.3439        | 1484.6540      | 742.8306         | 1483.6700      | 742.3386         | 12 |
| 4  | 413.2395  | 207.1234        | 396.2129       | 198.6101         |                |                  | L    | 1386.6536 | 693.8304        | 1369.6270      | 685.3172         | 1368.6430      | 684.8252         | 11 |
| 5  | 514.2871  | 257.6472        | 497.2606       | 249.1339         | 496.2766       | 248.6419         | T    | 1273.5695 | 637.2884        | 1256.5430      | 628.7751         | 1255.5590      | 628.2831         | 10 |
| 6  | 643.3297  | 322.1685        | 626.3032       | 313.6552         | 625.3192       | 313.1632         | Q    | 1172.5218 | 586.7646        | 1155.4953      | 578.2513         | 1154.5113      | 577.7593         | 9  |
| 7  | 700.3512  | 350.6792        | 683.3246       | 342.1660         | 682.3406       | 341.6740         | G    | 1043.4793 | 522.2433        | 1026.4527      | 513.7300         | 1025.4687      | 513.2380         | 8  |
| 8  | 829.3938  | 415.2005        | 812.3672       | 406.6873         | 811.3832       | 406.1953         | E    | 986.4578  | 493.7325        | 969.4312       | 485.2193         | 968.4472       | 484.7272         | 7  |
| 9  | 944.4207  | 472.7140        | 927.3942       | 464.2007         | 926.4102       | 463.7087         | D    | 857.4152  | 429.2112        | 840.3886       | 420.6980         | 839.4046       | 420.2060         | 6  |
| 10 | 1072.4793 | 536.7433        | 1055.4528      | 528.2300         | 1054.4687      | 527.7380         | Q    | 742.3883  | 371.6978        | 725.3617       | 363.1845         |                |                  | 5  |
| 11 | 1235.5426 | 618.2750        | 1218.5161      | 609.7617         | 1217.5321      | 609.2697         | Y    | 614.3297  | 307.6685        | 597.3031       | 299.1552         |                |                  | 4  |
| 12 | 1398.6060 | 699.8066        | 1381.5794      | 691.2933         | 1380.5954      | 690.8013         | Y    | 451.2663  | 226.1368        | 434.2398       | 217.6235         |                |                  | 3  |
| 13 | 1511.6900 | 756.3487        | 1494.6635      | 747.8354         | 1493.6795      | 747.3434         | L    | 288.2030  | 144.6051        | 271.1765       | 136.0919         |                |                  | 2  |
| 14 |           |                 |                |                  |                |                  | R    | 175.1190  | 88.0631         | 158.0924       | 79.5498          |                |                  | 1  |

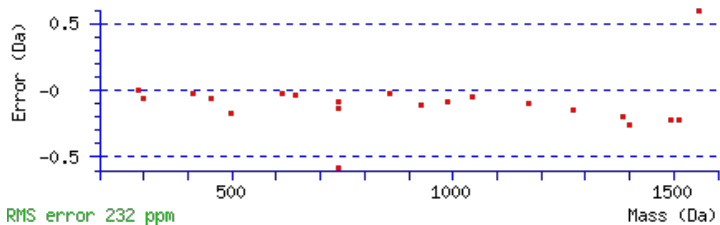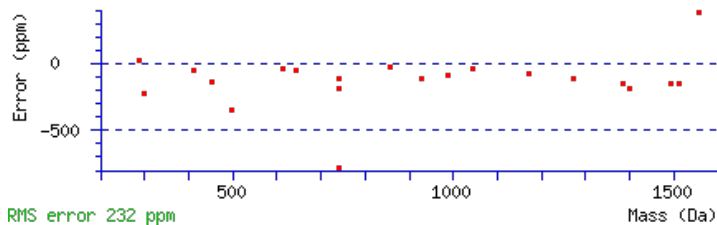

NCBI **BLAST** search of [LANLTQGEDQYYLR](#)

(Parameters: blastp, nr protein database, expect=20000, no filter, PAM30)

Other BLAST [web gateways](#)

**All matches to this query**

| Score | Mr(calc)  | Delta   | Sequence                         | Site Analysis            |
|-------|-----------|---------|----------------------------------|--------------------------|
| 73.8  | 1684.7944 | 0.0014  | <a href="#">LANLTQGEDQYYLR</a>   | Deamidated N3, Q6 95.84% |
| 59.0  | 1684.7944 | 0.0014  | <a href="#">LANLTQGEDQYYLR</a>   | Deamidated N3, Q10 3.18% |
| 53.8  | 1684.7944 | 0.0014  | <a href="#">LANLTQGEDQYYLR</a>   | Deamidated Q6, Q10 0.97% |
| 5.8   | 1684.8025 | -0.0066 | <a href="#">MRDAGDPSPPNKMLR</a>  |                          |
| 5.5   | 1684.7978 | -0.0019 | <a href="#">LGQLETNMETLYTR</a>   |                          |
| 3.3   | 1684.7912 | 0.0046  | <a href="#">KCKPQMNYDKLSR</a>    |                          |
| 3.1   | 1684.7953 | 0.0005  | <a href="#">ETPGFQLLGMYCLR</a>   |                          |
| 2.9   | 1683.7965 | 0.9993  | <a href="#">TLVWNASVNGHTGGNR</a> |                          |

Mascot: <http://www.matrixscience.com/>

# MATRIX SCIENCE Mascot Search Results

## Peptide View

MS/MS Fragmentation of **KKEDALNETR**

Found in **E5RGB0** in **con\_Xuniprot\_HUMAN3**, E5RGB0\_HUMAN Clusterin beta chain (Fragment) OS=Homo sapiens GN=CLU PE=2 SV=1

Match to Query 1679: 1203.611708 from(602.813130,2+) intensity(10490.8281) rtinseconds(158) scans(133) index(15561)

Title: 111019\_Est\_MI\_YP\_G\_05Spectrum70\_scans\_\_133

Data file C:\\mascot\\20140703\_Tmgf\_1D\\CSV\_UseAnalysis\\MasterCSV\\All\_Glyco\\mgf\\ptm\\UC18ERLIC\_PTM\_35D.mgf

Click mouse within plot area to zoom in by factor of two about that point

Or, to Da

Label all possible matches Label matches used for scoring

Show Y-axis

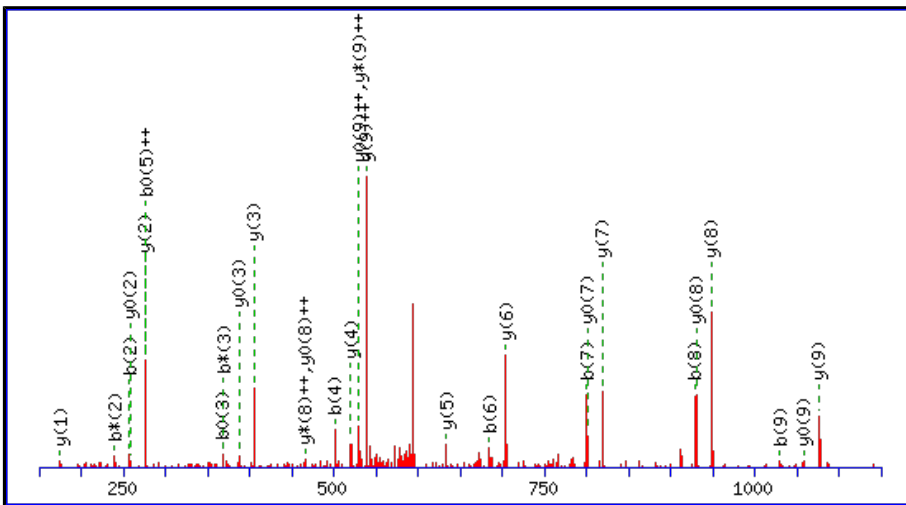

Monoisotopic mass of neutral peptide  $M_r(\text{calc})$ : 1203.6095

Fixed modifications: Carbamidomethyl (C) (apply to specified residues or termini only)

Variable modifications:

N7 : Deamidated (NQ)

Ions Score: 73 Expect: 1.4e-005

Matches : 29/102 fragment ions using 40 most intense peaks ([help](#))

| #  | b                | b <sup>++</sup> | b <sup>*</sup>  | b <sup>***</sup> | b <sup>0</sup>  | b <sup>0++</sup> | Seq. | y                | y <sup>++</sup> | y <sup>*</sup> | y <sup>***</sup> | y <sup>0</sup>   | y <sup>0++</sup> | #  |
|----|------------------|-----------------|-----------------|------------------|-----------------|------------------|------|------------------|-----------------|----------------|------------------|------------------|------------------|----|
| 1  | 129.1022         | 65.0548         | 112.0757        | 56.5415          |                 |                  | K    |                  |                 |                |                  |                  |                  | 10 |
| 2  | <b>257.1972</b>  | 129.1022        | <b>240.1707</b> | 120.5890         |                 |                  | K    | <b>1076.5218</b> | <b>538.7646</b> | 1059.4953      | <b>530.2513</b>  | <b>1058.5113</b> | <b>529.7593</b>  | 9  |
| 3  | 386.2398         | 193.6235        | <b>369.2132</b> | 185.1103         | <b>368.2292</b> | 184.6183         | E    | <b>948.4269</b>  | 474.7171        | 931.4003       | <b>466.2038</b>  | <b>930.4163</b>  | <b>465.7118</b>  | 8  |
| 4  | <b>501.2667</b>  | 251.1370        | 484.2402        | 242.6237         | 483.2562        | 242.1317         | D    | <b>819.3843</b>  | 410.1958        | 802.3577       | 401.6825         | <b>801.3737</b>  | 401.1905         | 7  |
| 5  | 572.3039         | 286.6556        | 555.2773        | 278.1423         | 554.2933        | <b>277.6503</b>  | A    | <b>704.3573</b>  | 352.6823        | 687.3308       | 344.1690         | 686.3468         | 343.6770         | 6  |
| 6  | <b>685.3879</b>  | 343.1976        | 668.3614        | 334.6843         | 667.3774        | 334.1923         | L    | <b>633.3202</b>  | 317.1638        | 616.2937       | 308.6505         | 615.3097         | 308.1585         | 5  |
| 7  | <b>800.4149</b>  | 400.7111        | 783.3883        | 392.1978         | 782.4043        | 391.7058         | N    | <b>520.2362</b>  | 260.6217        | 503.2096       | 252.1084         | 502.2256         | 251.6164         | 4  |
| 8  | <b>929.4575</b>  | 465.2324        | 912.4309        | 456.7191         | 911.4469        | 456.2271         | E    | <b>405.2092</b>  | 203.1082        | 388.1827       | 194.5950         | <b>387.1987</b>  | 194.1030         | 3  |
| 9  | <b>1030.5051</b> | 515.7562        | 1013.4786       | 507.2429         | 1012.4946       | 506.7509         | T    | <b>276.1666</b>  | 138.5870        | 259.1401       | 130.0737         | <b>258.1561</b>  | 129.5817         | 2  |
| 10 |                  |                 |                 |                  |                 |                  | R    | <b>175.1190</b>  | 88.0631         | 158.0924       | 79.5498          |                  |                  | 1  |

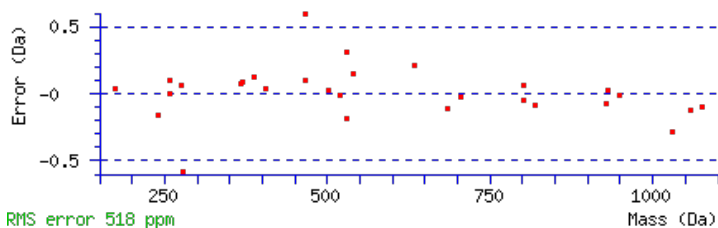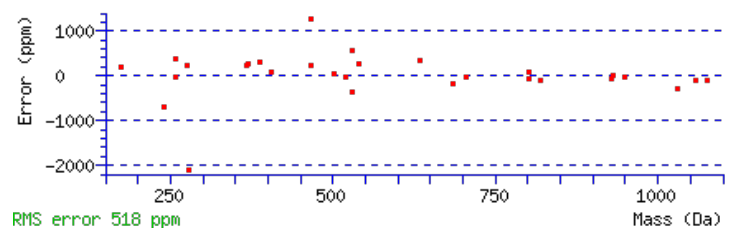

NCBI BLAST search of **KKEDALNETR**

(Parameters: blastp, nr protein database, expect=20000, no filter, PAM30)

Other BLAST [web gateways](#)

**All matches to this query**

| Score | Mr(calc)  | Delta   | Sequence                    |
|-------|-----------|---------|-----------------------------|
| 72.8  | 1203.6095 | 0.0022  | <a href="#">KKEDALNETR</a>  |
| 38.8  | 1203.6135 | -0.0018 | <a href="#">KKQNLQWEK</a>   |
| 28.7  | 1203.6169 | -0.0052 | <a href="#">QKEDLELAMK</a>  |
| 21.3  | 1202.6143 | 0.9974  | <a href="#">RVQVSQVQEK</a>  |
| 20.5  | 1203.6135 | -0.0018 | <a href="#">KKENQIEWK</a>   |
| 14.6  | 1203.6095 | 0.0022  | <a href="#">VGTGKQNELTR</a> |
| 14.4  | 1202.6044 | 1.0073  | <a href="#">FAGQLQGQPTR</a> |
| 14.4  | 1203.6095 | 0.0022  | <a href="#">SELNSRLEEK</a>  |
| 14.0  | 1203.6095 | 0.0022  | <a href="#">SSQSKGPKKEK</a> |
| 11.3  | 1202.6044 | 1.0073  | <a href="#">FAGQLQGQPTR</a> |

**Mascot:** <http://www.matrixscience.com/>



# MASCOT SCIENCE Mascot Search Results

## Peptide View

MS/MS Fragmentation of **KEDALNETR**

Found in **E5RGB0** in **con\_Xuniprot\_HUMAN3**, E5RGB0\_HUMAN Clusterin beta chain (Fragment) OS=Homo sapiens  
GN=CLU PE=2 SV=1

Match to Query 213: 1075.517288 from(538.765920,2+) intensity(2928.1667) rtinseconds(183) scans(234) index(25940)

Title: 111019\_Est\_MI\_YS\_G\_08Spectrum160\_scans\_\_234

Data file C:\mascot\20140703\_Tmgf\_1D\CSV\_UseAnalysis\MasterCSV\All\_Glyco\mgf\ptm\UC18ERIC\_PTM\_35D.mgf

Click mouse within plot area to zoom in by factor of two about that point

Or, to Da

Label all possible matches Label matches used for scoring

Show Y-axis

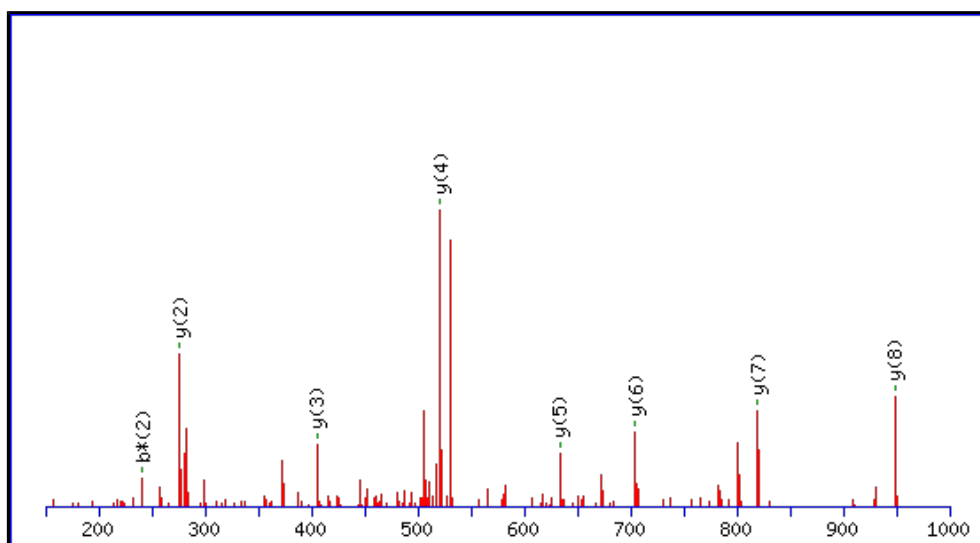

Monoisotopic mass of neutral peptide **Mr(calc)**: 1075.5145

Fixed modifications: Carbamidomethyl (C) (apply to specified residues or termini only)

Variable modifications:

N6 : Deamidated (NQ)

Ions Score: 69 Expect: 2.4e-005

Matches : 8/92 fragment ions using 8 most intense peaks ([help](#))

| # | b        | b <sup>++</sup> | b <sup>*</sup>  | b <sup>***</sup> | b <sup>0</sup> | b <sup>0++</sup> | Seq.     | y               | y <sup>++</sup> | y <sup>*</sup> | y <sup>***</sup> | y <sup>0</sup> | y <sup>0++</sup> | #        |
|---|----------|-----------------|-----------------|------------------|----------------|------------------|----------|-----------------|-----------------|----------------|------------------|----------------|------------------|----------|
| 1 | 129.1022 | 65.0548         | 112.0757        | 56.5415          |                |                  | <b>K</b> |                 |                 |                |                  |                |                  | <b>9</b> |
| 2 | 258.1448 | 129.5761        | <b>241.1183</b> | 121.0628         | 240.1343       | 120.5708         | <b>E</b> | <b>948.4269</b> | 474.7171        | 931.4003       | 466.2038         | 930.4163       | 465.7118         | <b>8</b> |
| 3 | 373.1718 | 187.0895        | 356.1452        | 178.5763         | 355.1612       | 178.0842         | <b>D</b> | <b>819.3843</b> | 410.1958        | 802.3577       | 401.6825         | 801.3737       | 401.1905         | <b>7</b> |
| 4 | 444.2089 | 222.6081        | 427.1823        | 214.0948         | 426.1983       | 213.6028         | <b>A</b> | <b>704.3573</b> | 352.6823        | 687.3308       | 344.1690         | 686.3468       | 343.6770         | <b>6</b> |
| 5 | 557.2930 | 279.1501        | 540.2664        | 270.6368         | 539.2824       | 270.1448         | <b>L</b> | <b>633.3202</b> | 317.1638        | 616.2937       | 308.6505         | 615.3097       | 308.1585         | <b>5</b> |
| 6 | 672.3199 | 336.6636        | 655.2933        | 328.1503         | 654.3093       | 327.6583         | <b>N</b> | <b>520.2362</b> | 260.6217        | 503.2096       | 252.1084         | 502.2256       | 251.6164         | <b>4</b> |
| 7 | 801.3625 | 401.1849        | 784.3359        | 392.6716         | 783.3519       | 392.1796         | <b>E</b> | <b>405.2092</b> | 203.1082        | 388.1827       | 194.5950         | 387.1987       | 194.1030         | <b>3</b> |
| 8 | 902.4102 | 451.7087        | 885.3836        | 443.1954         | 884.3996       | 442.7034         | <b>T</b> | <b>276.1666</b> | 138.5870        | 259.1401       | 130.0737         | 258.1561       | 129.5817         | <b>2</b> |
| 9 |          |                 |                 |                  |                |                  | <b>R</b> | 175.1190        | 88.0631         | 158.0924       | 79.5498          |                |                  | <b>1</b> |

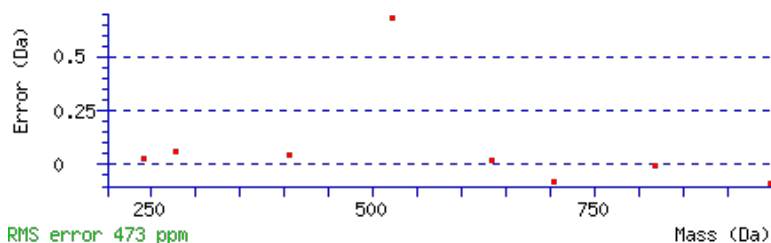

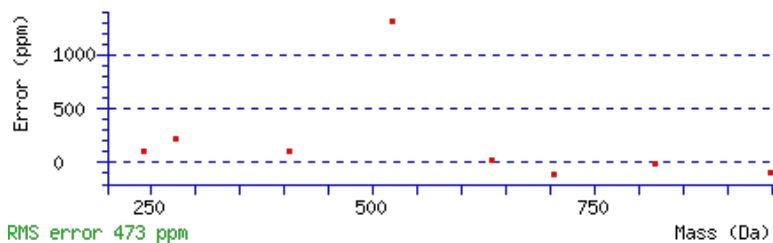

NCBI **BLAST** search of [KEDALNETR](#)

(Parameters: blastp, nr protein database, expect=20000, no filter, PAM30)

Other BLAST [web gateways](#)

**All matches to this query**

| Score | Mr(calc)  | Delta   | Sequence                   |
|-------|-----------|---------|----------------------------|
| 68.8  | 1075.5145 | 0.0028  | <a href="#">KEDALNETR</a>  |
| 33.9  | 1075.5145 | 0.0027  | <a href="#">KADELDETR</a>  |
| 21.2  | 1075.5185 | -0.0013 | <a href="#">KQNLQWEK</a>   |
| 21.1  | 1075.5145 | 0.0028  | <a href="#">KQREEEEEK</a>  |
| 21.0  | 1075.5186 | -0.0013 | <a href="#">KQWQEVEK</a>   |
| 20.7  | 1075.5186 | -0.0013 | <a href="#">KELWQDEK</a>   |
| 20.3  | 1075.5145 | 0.0028  | <a href="#">KDGKQNEEK</a>  |
| 20.2  | 1075.5185 | -0.0013 | <a href="#">KWEIQNEK</a>   |
| 19.1  | 1075.5146 | 0.0027  | <a href="#">ISGEGQTQQK</a> |
| 14.5  | 1075.5145 | 0.0028  | <a href="#">EKEREQEK</a>   |

Mascot: <http://www.matrixscience.com/>

# MASCOT SCIENCE Mascot Search Results

## Peptide View

MS/MS Fragmentation of **MLNTSSLLEQLNEQFNWVSR**

Found in **H0YAS8** in **con\_Xuniprot\_HUMAN3**, H0YAS8\_HUMAN Clusterin beta chain (Fragment) OS=Homo sapiens GN=CLU PE=4 SV=1

Match to Query 21498: 2409.169992 from(804.063940,3+) intensity(27012.7285) rtinseconds(2760) scans(7112) index(1010)

Title: 111019\_Est\_ISCardio\_NMI\_YP\_G\_2Spectrum6240\_scans\_\_7112

Data file C:\mascot\20140703\_Tmgf\_1D\CSV\_UseAnalysis\MasterCSV\All\_Glyco\mgf\ptm\UC18ERLIC\_PTM\_35D.mgf

Click mouse within plot area to zoom in by factor of two about that point

Or,  to  Da

Label all possible matches  Label matches used for scoring

Show Y-axis

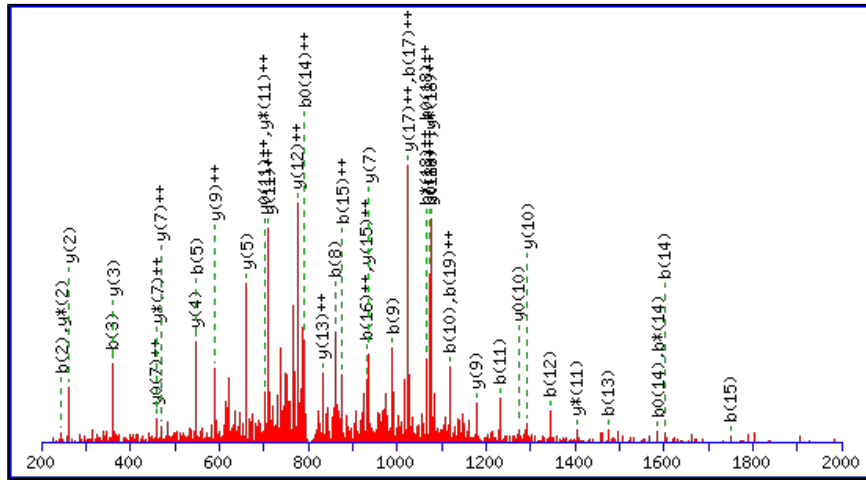

Monoisotopic mass of neutral peptide Mr(calc): 2409.1634

Fixed modifications: Carbamidomethyl (C) (apply to specified residues or termini only)

Variable modifications:

N3 : Deamidated (NQ)

Ions Score: 56 Expect: 0.00069

Matches : 44/216 fragment ions using 69 most intense peaks ([help](#))

| #  | b                | b <sup>++</sup>  | b <sup>*</sup>   | b <sup>*++</sup> | b <sup>0</sup>   | b <sup>0++</sup> | Seq. | y                | y <sup>++</sup>  | y <sup>*</sup>   | y <sup>*++</sup> | y <sup>0</sup>   | y <sup>0++</sup> | #  |
|----|------------------|------------------|------------------|------------------|------------------|------------------|------|------------------|------------------|------------------|------------------|------------------|------------------|----|
| 1  | 132.0478         | 66.5275          |                  |                  |                  |                  | M    |                  |                  |                  |                  |                  |                  | 20 |
| 2  | <b>245.1318</b>  | 123.0696         |                  |                  |                  |                  | L    | 2279.1303        | 1140.0688        | 2262.1037        | 1131.5555        | 2261.1197        | 1131.0635        | 19 |
| 3  | <b>360.1588</b>  | 180.5830         | 343.1322         | 172.0697         |                  |                  | N    | 2166.0462        | 1083.5267        | 2149.0196        | <b>1075.0135</b> | 2148.0356        | <b>1074.5214</b> | 18 |
| 4  | 461.2064         | 231.1069         | 444.1799         | 222.5936         | 443.1959         | 222.1016         | T    | 2051.0192        | <b>1026.0133</b> | 2033.9927        | 1017.5000        | 2033.0087        | 1017.0080        | 17 |
| 5  | <b>548.2385</b>  | 274.6229         | 531.2119         | 266.1096         | 530.2279         | 265.6176         | S    | 1949.9716        | 975.4894         | 1932.9450        | 966.9761         | 1931.9610        | 966.4841         | 16 |
| 6  | 635.2705         | 318.1389         | 618.2440         | 309.6256         | 617.2599         | 309.1336         | S    | 1862.9395        | <b>931.9734</b>  | 1845.9130        | 923.4601         | 1844.9290        | 922.9681         | 15 |
| 7  | 748.3546         | 374.6809         | 731.3280         | 366.1676         | 730.3440         | 365.6756         | L    | 1775.9075        | 888.4574         | 1758.8810        | 879.9441         | 1757.8969        | 879.4521         | 14 |
| 8  | <b>861.4386</b>  | 431.2230         | 844.4121         | 422.7097         | 843.4281         | 422.2177         | L    | 1662.8234        | <b>831.9154</b>  | 1645.7969        | 823.4021         | 1644.8129        | 822.9101         | 13 |
| 9  | <b>990.4812</b>  | 495.7443         | 973.4547         | 487.2310         | 972.4707         | 486.7390         | E    | 1549.7394        | <b>775.3733</b>  | 1532.7128        | 766.8601         | 1531.7288        | 766.3680         | 12 |
| 10 | <b>1118.5398</b> | 559.7735         | 1101.5133        | 551.2603         | 1100.5292        | 550.7683         | Q    | 1420.6968        | <b>710.8520</b>  | <b>1403.6702</b> | <b>702.3388</b>  | 1402.6862        | <b>701.8467</b>  | 11 |
| 11 | <b>1231.6239</b> | 616.3156         | 1214.5973        | 607.8023         | 1213.6133        | 607.3103         | L    | <b>1292.6382</b> | 646.8227         | 1275.6117        | 638.3095         | <b>1274.6276</b> | 637.8175         | 10 |
| 12 | <b>1345.6668</b> | 673.3370         | 1328.6402        | 664.8238         | 1327.6562        | 664.3318         | N    | <b>1179.5541</b> | <b>590.2807</b>  | 1162.5276        | 581.7674         | 1161.5436        | 581.2754         | 9  |
| 13 | <b>1474.7094</b> | 737.8583         | 1457.6828        | 729.3451         | 1456.6988        | 728.8530         | E    | 1065.5112        | 533.2592         | 1048.4847        | 524.7460         | 1047.5007        | 524.2540         | 8  |
| 14 | <b>1602.7680</b> | 801.8876         | <b>1585.7414</b> | 793.3743         | <b>1584.7574</b> | <b>792.8823</b>  | Q    | <b>936.4686</b>  | <b>468.7380</b>  | 919.4421         | <b>460.2247</b>  | 918.4581         | <b>459.7327</b>  | 7  |
| 15 | <b>1749.8364</b> | <b>875.4218</b>  | 1732.8098        | 866.9086         | 1731.8258        | 866.4165         | F    | 808.4100         | 404.7087         | 791.3835         | 396.1954         | 790.3995         | 395.7034         | 6  |
| 16 | 1863.8793        | <b>932.4433</b>  | 1846.8528        | 923.9300         | 1845.8687        | 923.4380         | N    | <b>661.3416</b>  | 331.1745         | 644.3151         | 322.6612         | 643.3311         | 322.1692         | 5  |
| 17 | 2049.9586        | <b>1025.4829</b> | 2032.9321        | 1016.9697        | 2031.9481        | 1016.4777        | W    | <b>547.2987</b>  | 274.1530         | 530.2722         | 265.6397         | 529.2881         | 265.1477         | 4  |
| 18 | 2149.0270        | <b>1075.0172</b> | 2132.0005        | <b>1066.5039</b> | 2131.0165        | <b>1066.0119</b> | V    | <b>361.2194</b>  | 181.1133         | 344.1928         | 172.6001         | 343.2088         | 172.1081         | 3  |
| 19 | 2236.0591        | <b>1118.5332</b> | 2219.0325        | 1110.0199        | 2218.0485        | 1109.5279        | S    | <b>262.1510</b>  | 131.5791         | <b>245.1244</b>  | 123.0659         | 244.1404         | 122.5738         | 2  |
| 20 |                  |                  |                  |                  |                  |                  | R    | 175.1190         | 88.0631          | 158.0924         | 79.5498          |                  |                  | 1  |

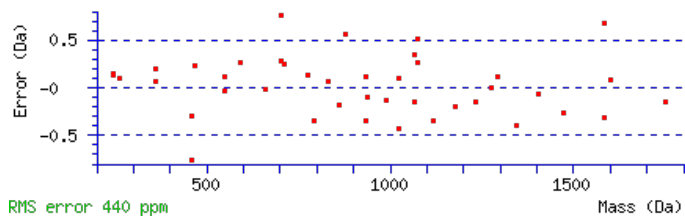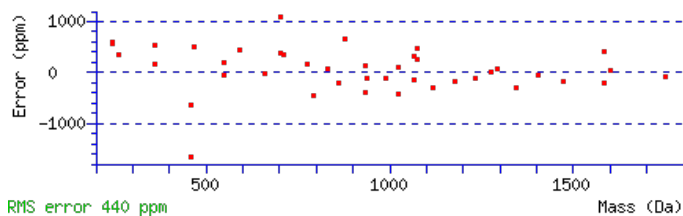

NCBI BLAST search of [MLNTSSLLEQLNEQFNWVSR](#)

(Parameters: blastp, nr protein database, expect=20000, no filter, PAM30)

Other BLAST [web gateways](#)

**All matches to this query**

| Score | Mr(calc)  | Delta  | Sequence                               | Site Analysis        |
|-------|-----------|--------|----------------------------------------|----------------------|
| 56.0  | 2409.1634 | 0.0066 | <a href="#">MLNTSSLLEQLNEQFNWVSR</a>   | Deamidated N3 92.22% |
| 41.6  | 2409.1634 | 0.0066 | <a href="#">MLNTSSLLEQLNEQFNWVSR</a>   | Deamidated Q10 3.37% |
| 39.7  | 2409.1634 | 0.0066 | <a href="#">MLNTSSLLEQLNEQFNWVSR</a>   | Deamidated N12 2.14% |
| 37.7  | 2409.1634 | 0.0066 | <a href="#">MLNTSSLLEQLNEQFNWVSR</a>   | Deamidated Q14 1.35% |
| 36.0  | 2409.1634 | 0.0066 | <a href="#">MLNTSSLLEQLNEQFNWVSR</a>   | Deamidated N16 0.92% |
| 9.5   | 2407.1689 | 2.0011 | <a href="#">NAEFEREQLITGSVESPCTLK</a>  |                      |
| 7.4   | 2407.1550 | 2.0150 | <a href="#">VCAQYLAEAEQAKAQAEERSR</a>  |                      |
| 5.3   | 2408.1675 | 1.0025 | <a href="#">ENVACMRAVSGINNTITVLTAR</a> |                      |
| 4.9   | 2407.1714 | 1.9986 | <a href="#">NELESQSSNSLTKNTLQNRLK</a>  |                      |
| 4.9   | 2407.1714 | 1.9986 | <a href="#">NELESQSSNSLTKNTLQNRLK</a>  |                      |

Mascot: <http://www.matrixscience.com/>

# MATRIX SCIENCE Mascot Search Results

## Peptide View

MS/MS Fragmentation of **LKELPGVCNETMMALWEECKPCLK**

Found in **E5RGB0** in **con\_Xuniprot\_HUMAN3**, E5RGB0\_HUMAN Clusterin beta chain (Fragment) OS=Homo sapiens GN=CLU PE=2 SV=1

Match to Query 27058: 2968.356376 from(743.096370,4+) intensity(12222.9014) rtinseconds(1442) scans(3582) index(24497)

Title: 111019\_Est\_MI\_YS\_G\_06Spectrum3103\_scans\_\_3582

Data file C:\mascot\20140703\_Tmgf\_1D\CSV\_UseAnalysis\MasterCSV\All\_Glyco\mgf\ptm\UC18ERLIC\_PTMs\_35D.mgf

Click mouse within plot area to zoom in by factor of two about that point

Or, to Da

Label all possible matches Label matches used for scoring

Show Y-axis

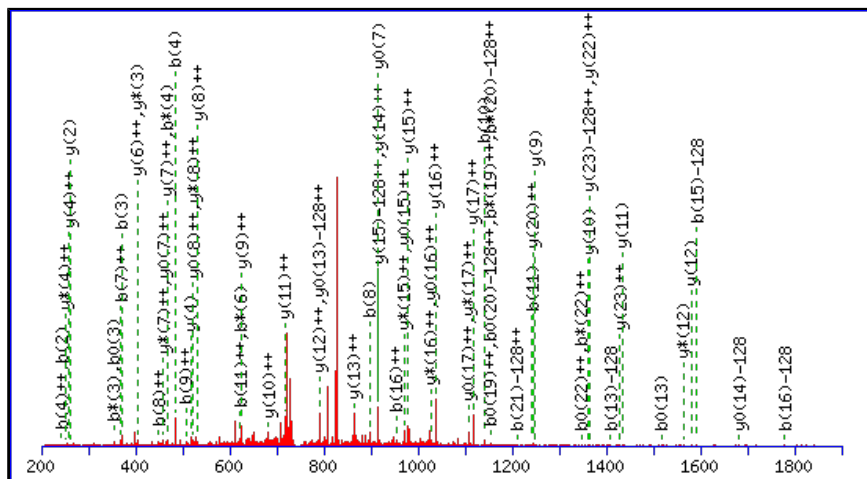

Monoisotopic mass of neutral peptide Mr(calc): 2968.3512

Fixed modifications: Carbamidomethyl (C) (apply to specified residues or termini only)

Variable modifications:

N9 : Deamidated (NQ)

M12 : Oxidation (M), with neutral losses 0.0000(shown in table), 63.9983

M13 : Oxidation (M), with neutral losses 0.0000(shown in table), 63.9983

Ions Score: 54 Expect: 0.00068

Matches : 67/402 fragment ions using 138 most intense peaks (help)

| #  | b         | b <sup>++</sup> | b <sup>*</sup> | b <sup>*++</sup> | b <sup>0</sup> | b <sup>0++</sup> | Seq. | y         | y <sup>++</sup> | y <sup>*</sup> | y <sup>*++</sup> | y <sup>0</sup> | y <sup>0++</sup> | #  |
|----|-----------|-----------------|----------------|------------------|----------------|------------------|------|-----------|-----------------|----------------|------------------|----------------|------------------|----|
| 1  | 114.0913  | 57.5493         |                |                  |                |                  | L    |           |                 |                |                  |                |                  | 24 |
| 2  | 242.1863  | 121.5968        | 225.1598       | 113.0835         |                |                  | K    | 2856.2745 | 1428.6409       | 2839.2479      | 1420.1276        | 2838.2639      | 1419.6356        | 23 |
| 3  | 371.2289  | 186.1181        | 354.2023       | 177.6048         | 353.2183       | 177.1128         | E    | 2728.1795 | 1364.5934       | 2711.1530      | 1356.0801        | 2710.1690      | 1355.5881        | 22 |
| 4  | 484.3130  | 242.6601        | 467.2864       | 234.1468         | 466.3024       | 233.6548         | L    | 2599.1369 | 1300.0721       | 2582.1104      | 1291.5588        | 2581.1264      | 1291.0668        | 21 |
| 5  | 581.3657  | 291.1865        | 564.3392       | 282.6732         | 563.3552       | 282.1812         | P    | 2486.0529 | 1243.5301       | 2469.0263      | 1235.0168        | 2468.0423      | 1234.5248        | 20 |
| 6  | 638.3872  | 319.6972        | 621.3606       | 311.1840         | 620.3766       | 310.6919         | G    | 2389.0001 | 1195.0037       | 2371.9736      | 1186.4904        | 2370.9895      | 1185.9984        | 19 |
| 7  | 737.4556  | 369.2314        | 720.4291       | 360.7182         | 719.4450       | 360.2262         | V    | 2331.9786 | 1166.4930       | 2314.9521      | 1157.9797        | 2313.9681      | 1157.4877        | 18 |
| 8  | 897.4863  | 449.2468        | 880.4597       | 440.7335         | 879.4757       | 440.2415         | C    | 2232.9102 | 1116.9588       | 2215.8837      | 1108.4455        | 2214.8997      | 1107.9535        | 17 |
| 9  | 1012.5132 | 506.7602        | 995.4866       | 498.2470         | 994.5026       | 497.7550         | N    | 2072.8796 | 1036.9434       | 2055.8530      | 1028.4302        | 2054.8690      | 1027.9381        | 16 |
| 10 | 1141.5558 | 571.2815        | 1124.5292      | 562.7683         | 1123.5452      | 562.2762         | E    | 1957.8526 | 979.4300        | 1940.8261      | 970.9167         | 1939.8421      | 970.4247         | 15 |
| 11 | 1242.6035 | 621.8054        | 1225.5769      | 613.2921         | 1224.5929      | 612.8001         | T    | 1828.8100 | 914.9087        | 1811.7835      | 906.3954         | 1810.7995      | 905.9034         | 14 |
| 12 | 1389.6389 | 695.3231        | 1372.6123      | 686.8098         | 1371.6283      | 686.3178         | M    | 1727.7624 | 864.3848        | 1710.7358      | 855.8715         | 1709.7518      | 855.3795         | 13 |
| 13 | 1536.6743 | 768.8408        | 1519.6477      | 760.3275         | 1518.6637      | 759.8355         | M    | 1580.7270 | 790.8671        | 1563.7004      | 782.3538         | 1562.7164      | 781.8618         | 12 |
| 14 | 1607.7114 | 804.3593        | 1590.6848      | 795.8461         | 1589.7008      | 795.3540         | A    | 1433.6916 | 717.3494        | 1416.6650      | 708.8361         | 1415.6810      | 708.3441         | 11 |
| 15 | 1720.7954 | 860.9014        | 1703.7689      | 852.3881         | 1702.7849      | 851.8961         | L    | 1362.6545 | 681.8309        | 1345.6279      | 673.3176         | 1344.6439      | 672.8256         | 10 |
| 16 | 1906.8748 | 953.9410        | 1889.8482      | 945.4277         | 1888.8642      | 944.9357         | W    | 1249.5704 | 625.2888        | 1232.5438      | 616.7756         | 1231.5598      | 616.2836         | 9  |
| 17 | 2035.9173 | 1018.4623       | 2018.8908      | 1009.9490        | 2017.9068      | 1009.4570        | E    | 1063.4911 | 532.2492        | 1046.4645      | 523.7359         | 1045.4805      | 523.2439         | 8  |
| 18 | 2164.9599 | 1082.9836       | 2147.9334      | 1074.4703        | 2146.9494      | 1073.9783        | E    | 934.4485  | 467.7279        | 917.4219       | 459.2146         | 916.4379       | 458.7226         | 7  |
| 19 | 2324.9906 | 1162.9989       | 2307.9640      | 1154.4857        | 2306.9800      | 1153.9937        | C    | 805.4059  | 403.2066        | 788.3793       | 394.6933         |                |                  | 6  |
| 20 | 2453.0856 | 1227.0464       | 2436.0590      | 1218.5331        | 2435.0750      | 1218.0411        | K    | 645.3752  | 323.1913        | 628.3487       | 314.6780         |                |                  | 5  |
| 21 | 2550.1383 | 1275.5728       | 2533.1118      | 1267.0595        | 2532.1278      | 1266.5675        | P    | 517.2803  | 259.1438        | 500.2537       | 250.6305         |                |                  | 4  |
| 22 | 2710.1690 | 1355.5881       | 2693.1424      | 1347.0748        | 2692.1584      | 1346.5828        | C    | 420.2275  | 210.6174        | 403.2010       | 202.1041         |                |                  | 3  |

|    |           |           |           |           |           |           |   |          |          |          |          |  |  |   |
|----|-----------|-----------|-----------|-----------|-----------|-----------|---|----------|----------|----------|----------|--|--|---|
| 23 | 2823.2530 | 1412.1302 | 2806.2265 | 1403.6169 | 2805.2425 | 1403.1249 | L | 260.1969 | 130.6021 | 243.1703 | 122.0888 |  |  | 2 |
| 24 |           |           |           |           |           |           | K | 147.1128 | 74.0600  | 130.0863 | 65.5468  |  |  | 1 |

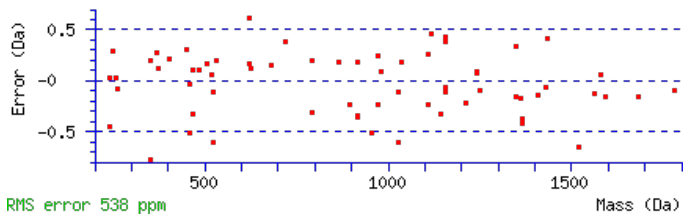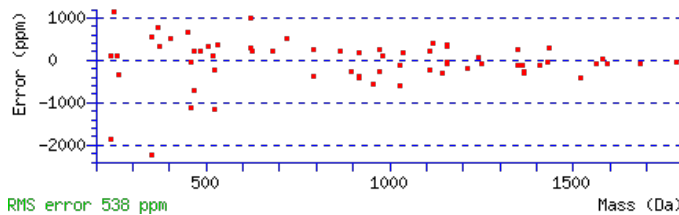

NCBI BLAST search of [LKELPGVCNETMMALWEECKPCLK](#)  
 (Parameters: blastp, nr protein database, expect=20000, no filter, PAM30)  
 Other BLAST [web gateways](#)

All matches to this query

| Score | Mr(calc)  | Delta   | Sequence                                     |
|-------|-----------|---------|----------------------------------------------|
| 54.3  | 2968.3512 | 0.0051  | <a href="#">LKELPGVCNETMMALWEECKPCLK</a>     |
| 49.7  | 2967.3672 | 0.9891  | <a href="#">LKELPGVCNETMMALWEECKPCLK</a>     |
| 8.8   | 2967.3610 | 0.9954  | <a href="#">IWDFVHLADYTMGRESPTGVSDGWGR</a>   |
| 4.7   | 2968.3591 | -0.0028 | <a href="#">MNEASVFAVLNFGCTGIMAGANMSGELK</a> |
| 4.0   | 2966.3421 | 2.0143  | <a href="#">LLQETMYMTVSIIDRFMQNNCVPK</a>     |
| 3.6   | 2968.3695 | -0.0131 | <a href="#">VMSELRQSMETFNNSAERGFEAYLK</a>    |
| 1.5   | 2967.3556 | 1.0008  | <a href="#">EQVMGSEPGPAFPTQPQKTQSDPQEPK</a>  |
| 1.3   | 2966.3484 | 2.0079  | <a href="#">AGINQNMDAVTEELQAKTGSLEEMTQR</a>  |
| 1.3   | 2966.3484 | 2.0079  | <a href="#">AGINQNMDAVTEELQAKTGSLEEMTQR</a>  |
| 1.3   | 2966.3484 | 2.0079  | <a href="#">AGINQNMDAVTEELQAKTGSLEEMTQR</a>  |

Mascot: <http://www.matrixscience.com/>

# MATRIX SCIENCE Mascot Search Results

## Peptide View

MS/MS Fragmentation of **EIRHNSTGCLR**

Found in **E7ETB4** in **con\_Xuniprot\_HUMAN3**, E7ETB4\_HUMAN Clusterin beta chain (Fragment) OS=Homo sapiens GN=CLU PE=2 SV=1

Match to Query 2035: 1342.642932 from(448.554920,3+) intensity(4826.1958) rtinseconds(144) scans(216) index(24317)

Title: 111019\_Est\_MI\_YS\_G\_06Spectrum168\_scans\_\_216

Data file C:\mascot\20140703\_Tmgf\_1D\CSV\_UseAnalysis\MasterCSV\All\_Glyco\mgf\ptm\UC18ERLIC\_PTM\_35D.mgf

Click mouse within plot area to zoom in by factor of two about that point

Or, to Da

Label all possible matches Label matches used for scoring

Show Y-axis

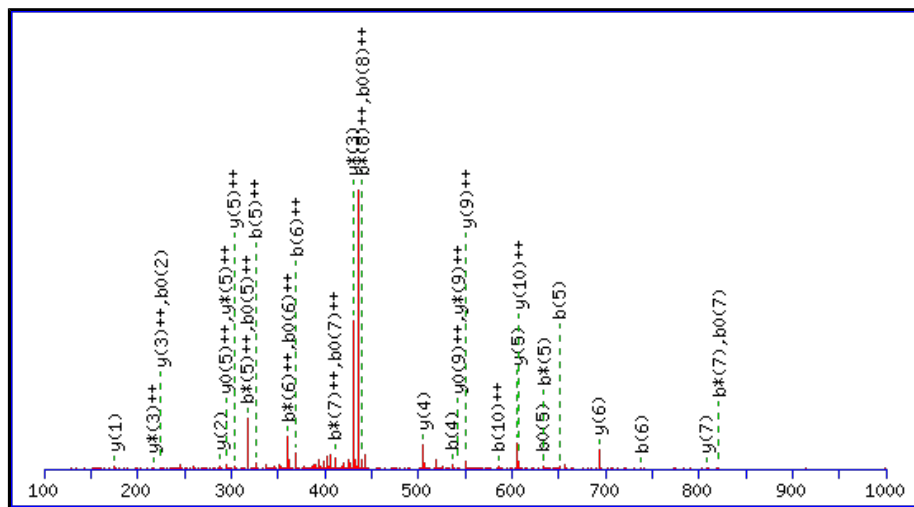

Monoisotopic mass of neutral peptide  $M_r(\text{calc})$ : 1342.6412

Fixed modifications: Carbamidomethyl (C) (apply to specified residues or termini only)

Variable modifications:

N5 : Deamidated (NQ)

Ions Score: 38 Expect: 0.022

Matches : 35/108 fragment ions using 44 most intense peaks ([help](#))

| #  | b         | b <sup>++</sup> | b <sup>*</sup> | b <sup>***</sup> | b <sup>0</sup> | b <sup>0++</sup> | Seq. | y         | y <sup>++</sup> | y <sup>*</sup> | y <sup>***</sup> | y <sup>0</sup> | y <sup>0++</sup> | #  |
|----|-----------|-----------------|----------------|------------------|----------------|------------------|------|-----------|-----------------|----------------|------------------|----------------|------------------|----|
| 1  | 130.0499  | 65.5286         |                |                  | 112.0393       | 56.5233          | E    |           |                 |                |                  |                |                  | 11 |
| 2  | 243.1339  | 122.0706        |                |                  | 225.1234       | 113.0653         | I    | 1214.6059 | 607.8066        | 1197.5793      | 599.2933         | 1196.5953      | 598.8013         | 10 |
| 3  | 399.2350  | 200.1212        | 382.2085       | 191.6079         | 381.2245       | 191.1159         | R    | 1101.5218 | 551.2645        | 1084.4953      | 542.7513         | 1083.5112      | 542.2593         | 9  |
| 4  | 536.2940  | 268.6506        | 519.2674       | 260.1373         | 518.2834       | 259.6453         | H    | 945.4207  | 473.2140        | 928.3941       | 464.7007         | 927.4101       | 464.2087         | 8  |
| 5  | 651.3209  | 326.1641        | 634.2944       | 317.6508         | 633.3103       | 317.1588         | N    | 808.3618  | 404.6845        | 791.3352       | 396.1713         | 790.3512       | 395.6792         | 7  |
| 6  | 738.3529  | 369.6801        | 721.3264       | 361.1668         | 720.3424       | 360.6748         | S    | 693.3348  | 347.1711        | 676.3083       | 338.6578         | 675.3243       | 338.1658         | 6  |
| 7  | 839.4006  | 420.2039        | 822.3741       | 411.6907         | 821.3900       | 411.1987         | T    | 606.3028  | 303.6550        | 589.2763       | 295.1418         | 588.2922       | 294.6498         | 5  |
| 8  | 896.4221  | 448.7147        | 879.3955       | 440.2014         | 878.4115       | 439.7094         | G    | 505.2551  | 253.1312        | 488.2286       | 244.6179         |                |                  | 4  |
| 9  | 1056.4527 | 528.7300        | 1039.4262      | 520.2167         | 1038.4422      | 519.7247         | C    | 448.2337  | 224.6205        | 431.2071       | 216.1072         |                |                  | 3  |
| 10 | 1169.5368 | 585.2720        | 1152.5102      | 576.7588         | 1151.5262      | 576.2667         | L    | 288.2030  | 144.6051        | 271.1765       | 136.0919         |                |                  | 2  |
| 11 |           |                 |                |                  |                |                  | R    | 175.1190  | 88.0631         | 158.0924       | 79.5498          |                |                  | 1  |

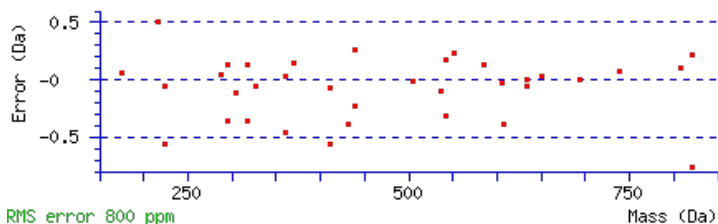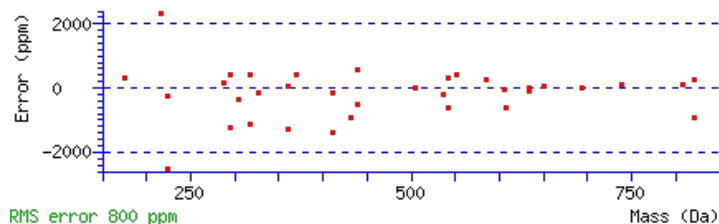

NCBI BLAST search of [EIRHNSTGCLR](#)



(Parameters: blastp, nr protein database, expect=20000, no filter, PAM30)

Other BLAST [web gateways](#)

**All matches to this query**

| Score | Mr(calc)  | Delta   | Sequence                        |
|-------|-----------|---------|---------------------------------|
| 38.4  | 1342.6412 | 0.0018  | <a href="#">EIRHNSTGCLR</a>     |
| 8.5   | 1342.6452 | -0.0023 | <a href="#">SRQGGFVYLCR</a>     |
| 6.9   | 1342.6452 | -0.0023 | <a href="#">ERGSNLAFMER</a>     |
| 5.6   | 1341.6412 | 1.0017  | <a href="#">NEKTLSDSSTNK</a>    |
| 5.2   | 1341.6353 | 1.0076  | <a href="#">DLSIFNGFWSR</a>     |
| 5.0   | 1342.6477 | -0.0048 | <a href="#">GSAAPAPTTAGTGQR</a> |
| 4.5   | 1340.6320 | 2.0109  | <a href="#">FQSSSQSRKQR</a>     |
| 4.2   | 1341.6353 | 1.0076  | <a href="#">NIDYLNFTWR</a>      |
| 3.7   | 1342.6405 | 0.0025  | <a href="#">DSNLSFEEFKK</a>     |
| 3.6   | 1341.6347 | 1.0083  | <a href="#">LLCPEENGSPAR</a>    |

**Mascot:** <http://www.matrixscience.com/>

# MASCOT SCIENCE Mascot Search Results

## Peptide View

MS/MS Fragmentation of **EDALNETRESETK**

Found in **E5RGB0** in **con\_Xuniprot\_HUMAN3**, E5RGB0\_HUMAN Clusterin beta chain (Fragment) OS=Homo sapiens GN=CLU PE=2 SV=1

Match to Query 6891: 1521.680922 from(508.234250,3+) intensity(765.4598) rtinseconds(277) scans(319) index(39)

Title: 111019\_Est\_ISCardio\_NMI\_200000g\_G\_3Spectrum212\_scans\_319

Data file C:\mascot\20140703\_Tmgf\_1D\CSV\_UseAnalysis\MasterCSV\All\_Glyco\mgf\ptm\UC18ERLIC\_PTM\_35D.mgf

Click mouse within plot area to zoom in by factor of two about that point

Or, to Da

Label all possible matches Label matches used for scoring

Show Y-axis

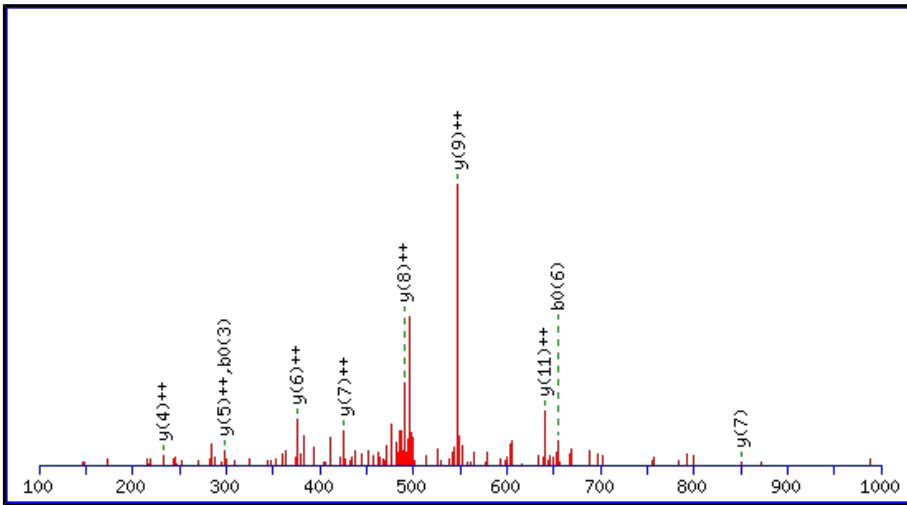

**Monoisotopic mass of neutral peptide Mr(calc):** 1521.6794

**Fixed modifications:** Carbamidomethyl (C) (apply to specified residues or termini only)

**Variable modifications:**

N5 : Deamidated (NQ)

**Ions Score:** 36 **Expect:** 0.029

**Matches :** 10/134 fragment ions using 17 most intense peaks ([help](#))

| #  | b         | b <sup>++</sup> | b <sup>*</sup> | b <sup>***</sup> | b <sup>0</sup> | b <sup>0++</sup> | Seq. | y         | y <sup>++</sup> | y <sup>*</sup> | y <sup>***</sup> | y <sup>0</sup> | y <sup>0++</sup> | #  |
|----|-----------|-----------------|----------------|------------------|----------------|------------------|------|-----------|-----------------|----------------|------------------|----------------|------------------|----|
| 1  | 130.0499  | 65.5286         |                |                  | 112.0393       | 56.5233          | E    |           |                 |                |                  |                |                  | 13 |
| 2  | 245.0768  | 123.0420        |                |                  | 227.0662       | 114.0368         | D    | 1393.6441 | 697.3257        | 1376.6176      | 688.8124         | 1375.6336      | 688.3204         | 12 |
| 3  | 316.1139  | 158.5606        |                |                  | 298.1034       | 149.5553         | A    | 1278.6172 | 639.8122        | 1261.5907      | 631.2990         | 1260.6066      | 630.8070         | 11 |
| 4  | 429.1980  | 215.1026        |                |                  | 411.1874       | 206.0974         | L    | 1207.5801 | 604.2937        | 1190.5535      | 595.7804         | 1189.5695      | 595.2884         | 10 |
| 5  | 544.2249  | 272.6161        | 527.1984       | 264.1028         | 526.2144       | 263.6108         | N    | 1094.4960 | 547.7516        | 1077.4695      | 539.2384         | 1076.4855      | 538.7464         | 9  |
| 6  | 673.2675  | 337.1374        | 656.2410       | 328.6241         | 655.2570       | 328.1321         | E    | 979.4691  | 490.2382        | 962.4425       | 481.7249         | 961.4585       | 481.2329         | 8  |
| 7  | 774.3152  | 387.6612        | 757.2887       | 379.1480         | 756.3046       | 378.6560         | T    | 850.4265  | 425.7169        | 833.3999       | 417.2036         | 832.4159       | 416.7116         | 7  |
| 8  | 930.4163  | 465.7118        | 913.3898       | 457.1985         | 912.4058       | 456.7065         | R    | 749.3788  | 375.1930        | 732.3523       | 366.6798         | 731.3682       | 366.1878         | 6  |
| 9  | 1059.4589 | 530.2331        | 1042.4324      | 521.7198         | 1041.4483      | 521.2278         | E    | 593.2777  | 297.1425        | 576.2511       | 288.6292         | 575.2671       | 288.1372         | 5  |
| 10 | 1146.4909 | 573.7491        | 1129.4644      | 565.2358         | 1128.4804      | 564.7438         | S    | 464.2351  | 232.6212        | 447.2086       | 224.1079         | 446.2245       | 223.6159         | 4  |
| 11 | 1275.5335 | 638.2704        | 1258.5070      | 629.7571         | 1257.5230      | 629.2651         | E    | 377.2031  | 189.1052        | 360.1765       | 180.5919         | 359.1925       | 180.0999         | 3  |
| 12 | 1376.5812 | 688.7942        | 1359.5547      | 680.2810         | 1358.5706      | 679.7890         | T    | 248.1605  | 124.5839        | 231.1339       | 116.0706         | 230.1499       | 115.5786         | 2  |
| 13 |           |                 |                |                  |                |                  | K    | 147.1128  | 74.0600         | 130.0863       | 65.5468          |                |                  | 1  |

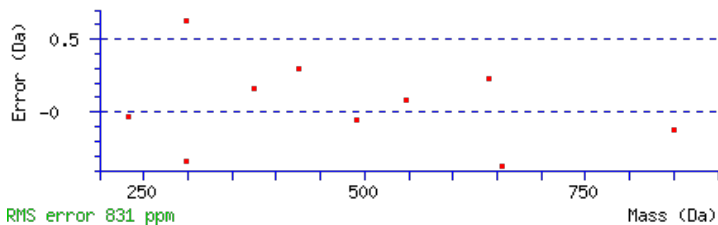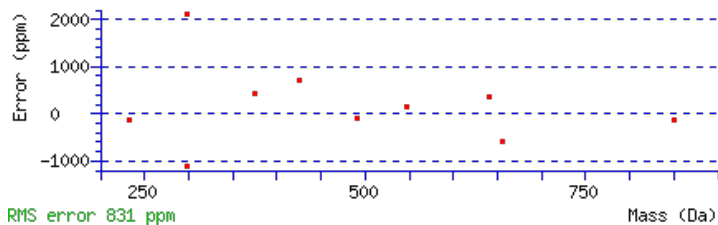

NCBI **BLAST** search of [EDALNETRESETK](#)

(Parameters: blastp, nr protein database, expect=20000, no filter, PAM30)

Other BLAST [web gateways](#)

**All matches to this query**

| Score | Mr(calc)  | Delta  | Sequence                       |
|-------|-----------|--------|--------------------------------|
| 36.0  | 1521.6794 | 0.0015 | <a href="#">EDALNETRESETK</a>  |
| 8.7   | 1519.6759 | 2.0050 | <a href="#">NTLPGVGPCESSMR</a> |
| 8.0   | 1519.6765 | 2.0044 | <a href="#">CHKNSYYQYKK</a>    |
| 7.9   | 1520.6851 | 0.9958 | <a href="#">IKEGNLTCGPGEVM</a> |
| 7.8   | 1521.6769 | 0.0040 | <a href="#">KDMTFLHEGNDSK</a>  |
| 6.5   | 1520.6776 | 1.0033 | <a href="#">GPAEDMSSKLNQAR</a> |
| 4.7   | 1521.6803 | 0.0006 | <a href="#">MDQLMQLPGQTSR</a>  |
| 4.0   | 1519.6766 | 2.0043 | <a href="#">FDGGLDNMSVFER</a>  |
| 3.8   | 1521.6738 | 0.0071 | <a href="#">NLLSCCKNOCPK</a>   |
| 3.8   | 1521.6738 | 0.0071 | <a href="#">NLLSCCKNOCPK</a>   |

Mascot: <http://www.matrixscience.com/>

# MATRIX SCIENCE Mascot Search Results

## Peptide View

MS/MS Fragmentation of **NSVLNSSTAETHSSPYSEDPIEDPLQPDVTGIR**

Found in **P12259** in **con\_Xuniprot\_HUMAN3**, FA5\_HUMAN Coagulation factor V OS=Homo sapiens GN=F5 PE=1 SV=4

Match to Query 27779: 3454.615962 from(1152.545930,3+) intensity(13982.8486) rtinseconds(1739) scans(4659) index(17614)

Title: 111019\_Est\_MI\_YP\_G\_07Spectrum3999\_scans\_\_4659

Data file C:\mascot\20140703\_Tmgf\_1D\CSV\_UseAnalysis\MasterCSV\All\_Glyco\mgf\ptm\UC18ERLIC\_PTM\_35D.mgf

Click mouse within plot area to zoom in by factor of two about that point

Or, to Da

Label all possible matches Label matches used for scoring

Show Y-axis

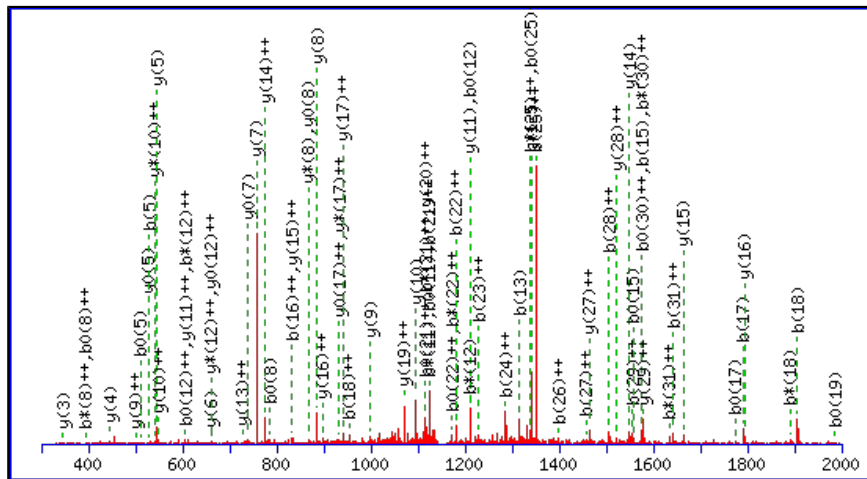

Monoisotopic mass of neutral peptide Mr(calc): 3454.6012

Fixed modifications: Carbamidomethyl (C) (apply to specified residues or termini only)

Variable modifications:

N5 : Deamidated (NQ)

Ions Score: 64 Expect: 9.1e-005

Matches : 75/364 fragment ions using 136 most intense peaks ([help](#))

| #  | b                | b <sup>++</sup>  | b <sup>*</sup>   | b <sup>*++</sup> | b <sup>0</sup>   | b <sup>0++</sup> | Seq. | y                | y <sup>++</sup>  | y <sup>*</sup> | y <sup>*++</sup> | y <sup>0</sup> | y <sup>0++</sup> | #  |
|----|------------------|------------------|------------------|------------------|------------------|------------------|------|------------------|------------------|----------------|------------------|----------------|------------------|----|
| 1  | 115.0502         | 58.0287          | 98.0237          | 49.5155          |                  |                  | N    |                  |                  |                |                  |                |                  | 32 |
| 2  | 202.0822         | 101.5448         | 185.0557         | 93.0315          | 184.0717         | 92.5395          | S    | 3341.5656        | 1671.2864        | 3324.5390      | 1662.7731        | 3323.5550      | 1662.2811        | 31 |
| 3  | 301.1506         | 151.0790         | 284.1241         | 142.5657         | 283.1401         | 142.0737         | V    | 3254.5335        | 1627.7704        | 3237.5070      | 1619.2571        | 3236.5230      | 1618.7651        | 30 |
| 4  | 414.2347         | 207.6210         | 397.2082         | 199.1077         | 396.2241         | 198.6157         | L    | 3155.4651        | 1578.2362        | 3138.4386      | 1569.7229        | 3137.4546      | 1569.2309        | 29 |
| 5  | <b>529.2617</b>  | 265.1345         | 512.2351         | 256.6212         | <b>511.2511</b>  | 256.1292         | N    | 3042.3811        | <b>1521.6942</b> | 3025.3545      | 1513.1809        | 3024.3705      | 1512.6889        | 28 |
| 6  | 616.2937         | 308.6505         | 599.2671         | 300.1372         | 598.2831         | 299.6452         | S    | 2927.3541        | <b>1464.1807</b> | 2910.3276      | 1455.6674        | 2909.3436      | 1455.1754        | 27 |
| 7  | 703.3257         | 352.1665         | 686.2992         | 343.6532         | 685.3151         | 343.1612         | S    | 2840.3221        | 1420.6647        | 2823.2955      | 1412.1514        | 2822.3115      | 1411.6594        | 26 |
| 8  | 804.3734         | 402.6903         | 787.3468         | <b>394.1771</b>  | <b>786.3628</b>  | <b>393.6850</b>  | T    | 2753.2901        | 1377.1487        | 2736.2635      | 1368.6354        | 2735.2795      | 1368.1434        | 25 |
| 9  | 875.4105         | 438.2089         | 858.3840         | 429.6956         | 857.3999         | 429.2036         | A    | 2652.2424        | 1326.6248        | 2635.2158      | 1318.1116        | 2634.2318      | 1317.6195        | 24 |
| 10 | 1004.4531        | 502.7302         | 987.4265         | 494.2169         | 986.4425         | 493.7249         | E    | 2581.2053        | 1291.1063        | 2564.1787      | 1282.5930        | 2563.1947      | 1282.1010        | 23 |
| 11 | 1141.5120        | 571.2596         | <b>1124.4855</b> | 562.7464         | <b>1123.5014</b> | 562.2544         | H    | 2452.1627        | 1226.5850        | 2435.1361      | 1218.0717        | 2434.1521      | 1217.5797        | 22 |
| 12 | 1228.5440        | 614.7757         | <b>1211.5175</b> | <b>606.2624</b>  | <b>1210.5335</b> | <b>605.7704</b>  | S    | 2315.1038        | 1158.0555        | 2298.0772      | 1149.5422        | 2297.0932      | 1149.0502        | 21 |
| 13 | <b>1315.5761</b> | 658.2917         | 1298.5495        | 649.7784         | 1297.5655        | 649.2864         | S    | 2228.0717        | <b>1114.5395</b> | 2211.0452      | 1106.0262        | 2210.0612      | 1105.5342        | 20 |
| 14 | 1412.6288        | 706.8181         | 1395.6023        | 698.3048         | 1394.6183        | 697.8128         | P    | 2141.0397        | <b>1071.0235</b> | 2124.0132      | 1062.5102        | 2123.0291      | 1062.0182        | 19 |
| 15 | <b>1575.6922</b> | 788.3497         | 1558.6656        | 779.8364         | <b>1557.6816</b> | 779.3444         | Y    | 2043.9869        | 1022.4971        | 2026.9604      | 1013.9838        | 2025.9764      | 1013.4918        | 18 |
| 16 | 1662.7242        | <b>831.8657</b>  | 1645.6976        | 823.3525         | 1644.7136        | 822.8604         | S    | 1880.9236        | <b>940.9654</b>  | 1863.8971      | <b>932.4522</b>  | 1862.9130      | <b>931.9602</b>  | 17 |
| 17 | <b>1791.7668</b> | 896.3870         | 1774.7402        | 887.8738         | <b>1773.7562</b> | 887.3817         | E    | <b>1793.8916</b> | <b>897.4494</b>  | 1776.8650      | 888.9362         | 1775.8810      | 888.4441         | 16 |
| 18 | <b>1906.7937</b> | <b>953.9005</b>  | <b>1889.7672</b> | 945.3872         | 1888.7832        | 944.8952         | D    | <b>1664.8490</b> | <b>832.9281</b>  | 1647.8224      | 824.4149         | 1646.8384      | 823.9229         | 15 |
| 19 | 2003.8465        | 1002.4269        | 1986.8199        | 993.9136         | <b>1985.8359</b> | 993.4216         | P    | <b>1549.8220</b> | <b>775.4147</b>  | 1532.7955      | 766.9014         | 1531.8115      | 766.4094         | 14 |
| 20 | 2116.9305        | 1058.9689        | 2099.9040        | 1050.4556        | 2098.9200        | 1049.9636        | I    | 1452.7693        | <b>726.8883</b>  | 1435.7427      | 718.3750         | 1434.7587      | 717.8830         | 13 |
| 21 | 2245.9731        | <b>1123.4902</b> | 2228.9466        | <b>1114.9769</b> | 2227.9626        | <b>1114.4849</b> | E    | <b>1339.6852</b> | 670.3462         | 1322.6587      | <b>661.8330</b>  | 1321.6747      | <b>661.3410</b>  | 12 |
| 22 | 2361.0001        | <b>1181.0037</b> | 2343.9735        | <b>1172.4904</b> | 2342.9895        | <b>1171.9984</b> | D    | <b>1210.6426</b> | <b>605.8250</b>  | 1193.6161      | 597.3117         | 1192.6321      | 596.8197         | 11 |
| 23 | 2458.0528        | <b>1229.5301</b> | 2441.0263        | 1221.0168        | 2440.0423        | 1220.5248        | P    | <b>1095.6157</b> | <b>548.3115</b>  | 1078.5891      | <b>539.7982</b>  | 1077.6051      | 539.3062         | 10 |

|    |           |                  |           |                  |           |                  |   |                 |                 |                 |          |                 |          |   |
|----|-----------|------------------|-----------|------------------|-----------|------------------|---|-----------------|-----------------|-----------------|----------|-----------------|----------|---|
| 24 | 2571.1369 | <b>1286.0721</b> | 2554.1104 | 1277.5588        | 2553.1263 | 1277.0668        | L | <b>998.5629</b> | <b>499.7851</b> | 981.5364        | 491.2718 | 980.5524        | 490.7798 | 9 |
| 25 | 2699.1955 | <b>1350.1014</b> | 2682.1689 | <b>1341.5881</b> | 2681.1849 | <b>1341.0961</b> | Q | <b>885.4789</b> | 443.2431        | <b>868.4523</b> | 434.7298 | <b>867.4683</b> | 434.2378 | 8 |
| 26 | 2796.2483 | <b>1398.6278</b> | 2779.2217 | 1390.1145        | 2778.2377 | 1389.6225        | P | <b>757.4203</b> | 379.2138        | 740.3937        | 370.7005 | <b>739.4097</b> | 370.2085 | 7 |
| 27 | 2911.2752 | <b>1456.1412</b> | 2894.2486 | 1447.6280        | 2893.2646 | 1447.1360        | D | <b>660.3675</b> | 330.6874        | 643.3410        | 322.1741 | 642.3570        | 321.6821 | 6 |
| 28 | 3010.3436 | <b>1505.6754</b> | 2993.3171 | 1497.1622        | 2992.3330 | 1496.6702        | V | <b>545.3406</b> | 273.1739        | 528.3140        | 264.6606 | <b>527.3300</b> | 264.1686 | 5 |
| 29 | 3111.3913 | <b>1556.1993</b> | 3094.3647 | 1547.6860        | 3093.3807 | 1547.1940        | T | <b>446.2722</b> | 223.6397        | 429.2456        | 215.1264 | 428.2616        | 214.6344 | 4 |
| 30 | 3168.4128 | 1584.7100        | 3151.3862 | <b>1576.1967</b> | 3150.4022 | <b>1575.7047</b> | G | <b>345.2245</b> | 173.1159        | 328.1979        | 164.6026 |                 |          | 3 |
| 31 | 3281.4968 | <b>1641.2520</b> | 3264.4703 | <b>1632.7388</b> | 3263.4863 | 1632.2468        | I | 288.2030        | 144.6051        | 271.1765        | 136.0919 |                 |          | 2 |
| 32 |           |                  |           |                  |           |                  | R | 175.1190        | 88.0631         | 158.0924        | 79.5498  |                 |          | 1 |

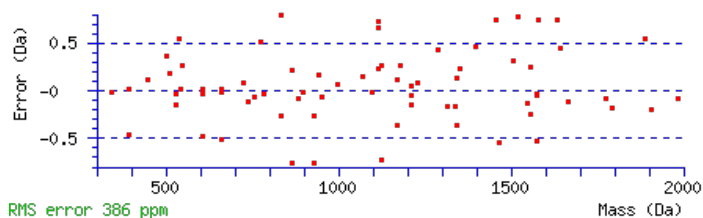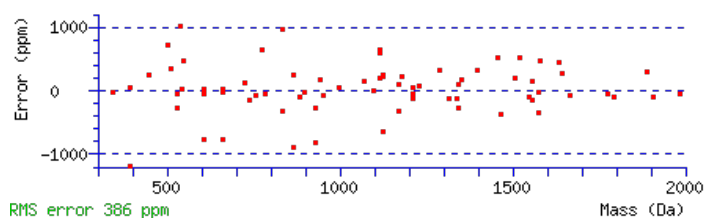

NCBI BLAST search of [NSVLNSSTAEHSSPYSEDPIEDPLQPDVTGIR](#)  
 (Parameters: blastp, nr protein database, expect=20000, no filter, PAM30)  
 Other BLAST [web gateways](#)

All matches to this query

| Score | Mr(calc)  | Delta  | Sequence                                         | Site Analysis        |
|-------|-----------|--------|--------------------------------------------------|----------------------|
| 63.9  | 3454.6012 | 0.0148 | <a href="#">NSVLNSSTAEHSSPYSEDPIEDPLQPDVTGIR</a> | Deamidated N5 81.80% |
| 56.9  | 3454.6012 | 0.0148 | <a href="#">NSVLNSSTAEHSSPYSEDPIEDPLQPDVTGIR</a> | Deamidated N1 16.47% |
| 47.1  | 3454.6012 | 0.0148 | <a href="#">NSVLNSSTAEHSSPYSEDPIEDPLQPDVTGIR</a> | Deamidated Q25 1.72% |
| 39.1  | 3453.6172 | 0.9988 | <a href="#">NSVLNSSTAEHSSPYSEDPIEDPLQPDVTGIR</a> |                      |
| 9.7   | 3453.6101 | 1.0058 | <a href="#">IIKGYMKQGNLHNMALQSQNGDAMQILASDK</a>  |                      |
| 7.9   | 3453.6101 | 1.0058 | <a href="#">IIKGYMKQGNLHNMALQSQNGDAMQILASDK</a>  |                      |
| 7.5   | 3454.5987 | 0.0172 | <a href="#">AGGLGINLTAADTVIFYSDWNPTVDQQAMDR</a>  |                      |
| 7.5   | 3454.5987 | 0.0172 | <a href="#">AGGLGINLTAADTVIFYSDWNPTVDQQAMDR</a>  |                      |
| 7.5   | 3454.5987 | 0.0172 | <a href="#">AGGLGINLTAADTVIFYSDWNPTVDQQAMDR</a>  |                      |
| 6.3   | 3452.6261 | 1.9898 | <a href="#">IIKGYMKQGNLHNMALQSQNGDAMQILASDK</a>  |                      |

Mascot: <http://www.matrixscience.com/>

# MASCOT SCIENCE Mascot Search Results

## Peptide View

MS/MS Fragmentation of **TWNQSIALR**

Found in **P12259** in **con\_Xuniprot\_HUMAN3**, FA5\_HUMAN Coagulation factor V OS=Homo sapiens GN=F5 PE=1 SV=4

Match to Query 217: 1088.565228 from(545.289890,2+) intensity(24401.3145) rtinseconds(1076) scans(2326) index(11660)

Title: 111019\_Est\_ISCardio\_NMI\_YS\_G\_8Spectrum1993\_scans\_\_2326

Data file C:\mascot\20140703\_Tmgf\_1D\CSV\_UseAnalysis\MasterCSV\All\_Glyco\mgf\ptm\UC18ERLIC\_PTM\_35D.mgf

Click mouse within plot area to zoom in by factor of two about that point

Or,  to  Da

Label all possible matches  Label matches used for scoring

Show Y-axis

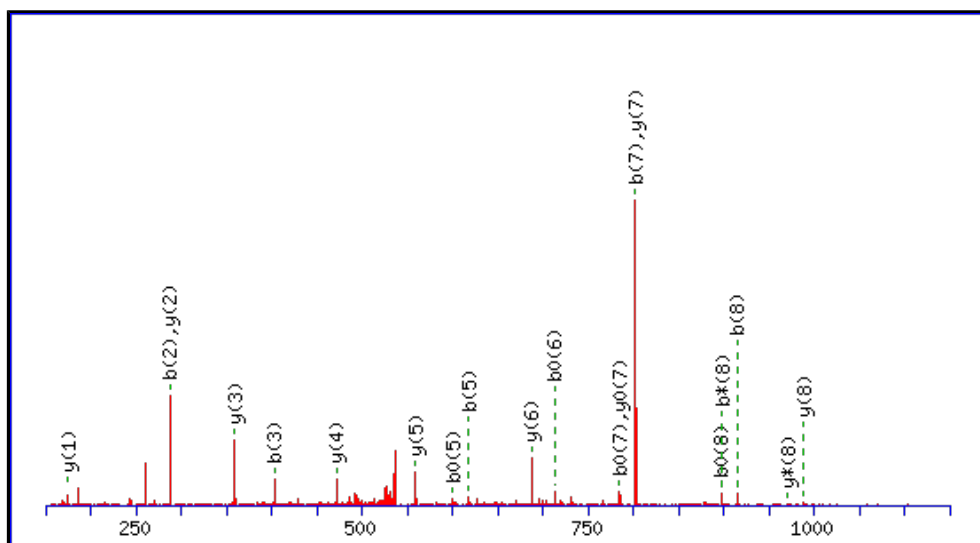

Monoisotopic mass of neutral peptide  $M_r(\text{calc})$ : 1088.5614

Fixed modifications: Carbamidomethyl (C) (apply to specified residues or termini only)

Variable modifications:

N3 : Deamidated (NQ)

Ions Score: 61 Expect: 0.00017

Matches : 20/84 fragment ions using 29 most intense peaks ([help](#))

| # | b               | b <sup>++</sup> | b*              | b <sup>+++</sup> | b <sup>0</sup>  | b <sup>0++</sup> | Seq. | y               | y <sup>++</sup> | y*              | y <sup>+++</sup> | y <sup>0</sup>  | y <sup>0++</sup> | # |
|---|-----------------|-----------------|-----------------|------------------|-----------------|------------------|------|-----------------|-----------------|-----------------|------------------|-----------------|------------------|---|
| 1 | 102.0550        | 51.5311         |                 |                  | 84.0444         | 42.5258          | T    |                 |                 |                 |                  |                 |                  | 9 |
| 2 | <b>288.1343</b> | 144.5708        |                 |                  | 270.1237        | 135.5655         | W    | <b>988.5211</b> | 494.7642        | <b>971.4945</b> | 486.2509         | 970.5105        | 485.7589         | 8 |
| 3 | <b>403.1612</b> | 202.0842        | 386.1347        | 193.5710         | 385.1506        | 193.0790         | N    | <b>802.4417</b> | 401.7245        | 785.4152        | 393.2112         | <b>784.4312</b> | 392.7192         | 7 |
| 4 | 531.2198        | 266.1135        | 514.1932        | 257.6003         | 513.2092        | 257.1083         | Q    | <b>687.4148</b> | 344.2110        | 670.3883        | 335.6978         | 669.4042        | 335.2058         | 6 |
| 5 | <b>618.2518</b> | 309.6295        | 601.2253        | 301.1163         | <b>600.2413</b> | 300.6243         | S    | <b>559.3562</b> | 280.1817        | 542.3297        | 271.6685         | 541.3457        | 271.1765         | 5 |
| 6 | 731.3359        | 366.1716        | 714.3093        | 357.6583         | <b>713.3253</b> | 357.1663         | I    | <b>472.3242</b> | 236.6657        | 455.2976        | 228.1525         |                 |                  | 4 |
| 7 | <b>802.3730</b> | 401.6901        | 785.3464        | 393.1769         | <b>784.3624</b> | 392.6849         | A    | <b>359.2401</b> | 180.1237        | 342.2136        | 171.6104         |                 |                  | 3 |
| 8 | <b>915.4571</b> | 458.2322        | <b>898.4305</b> | 449.7189         | <b>897.4465</b> | 449.2269         | L    | <b>288.2030</b> | 144.6051        | 271.1765        | 136.0919         |                 |                  | 2 |
| 9 |                 |                 |                 |                  |                 |                  | R    | <b>175.1190</b> | 88.0631         | 158.0924        | 79.5498          |                 |                  | 1 |

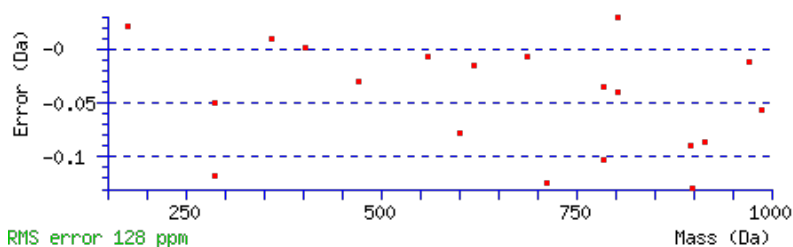

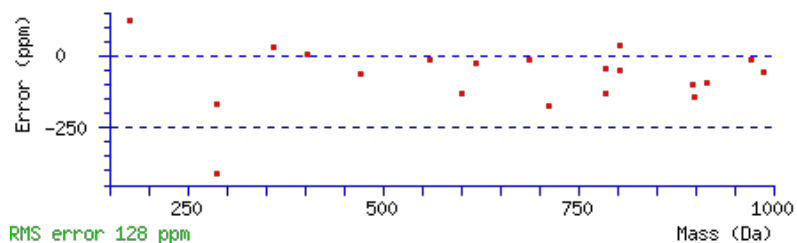

NCBI **BLAST** search of [TWNQSIALR](#)

(Parameters: blastp, nr protein database, expect=20000, no filter, PAM30)

Other BLAST [web gateways](#)

**All matches to this query**

| Score | Mr(calc)  | Delta   | Sequence                  | Site Analysis        |
|-------|-----------|---------|---------------------------|----------------------|
| 61.3  | 1088.5614 | 0.0038  | <a href="#">TWNQSIALR</a> | Deamidated N3 63.10% |
| 59.0  | 1088.5614 | 0.0038  | <a href="#">TWNQSIALR</a> | Deamidated Q4 36.90% |
| 22.0  | 1088.5648 | 0.0004  | <a href="#">DMKPAKDLR</a> |                      |
| 17.0  | 1088.5686 | -0.0034 | <a href="#">SAESRRVQR</a> |                      |
| 14.0  | 1088.5648 | 0.0004  | <a href="#">EGKLMQLDR</a> |                      |
| 14.0  | 1088.5686 | -0.0034 | <a href="#">QRGESSRIR</a> |                      |
| 13.6  | 1088.5655 | -0.0002 | <a href="#">WEFQLPLR</a>  |                      |
| 13.4  | 1088.5648 | 0.0004  | <a href="#">SEAILQCLR</a> |                      |
| 13.1  | 1088.5648 | 0.0004  | <a href="#">EMTLQQALR</a> |                      |
| 11.7  | 1088.5648 | 0.0004  | <a href="#">NOEVKIAMR</a> |                      |

Mascot: <http://www.matrixscience.com/>



# MASCOT SCIENCE Mascot Search Results

## Peptide View

MS/MS Fragmentation of **TNINSSRDPDNIAAWYLR**

Found in **P12259** in **con\_Xuniprot\_HUMAN3**, FA5\_HUMAN Coagulation factor V OS=Homo sapiens GN=F5 PE=1 SV=4

Match to Query 13899: 2106.017202 from(703.013010,3+) intensity(251547.2969) rtinseconds(1619) scans(4068) index(24549)

Title: 111019\_Est\_MI\_YS\_G\_06Spectrum3529\_scans\_4068

Data file C:\\mascot\\20140703\_Tmgf\_1D\\CSV\_UseAnalysis\\MasterCSV\\All\_Glyco\\mgf\\ptm\\UC18ERLIC\_PTM\_35D.mgf

Click mouse within plot area to zoom in by factor of two about that point

Or, to Da

Label all possible matches Label matches used for scoring

Show Y-axis

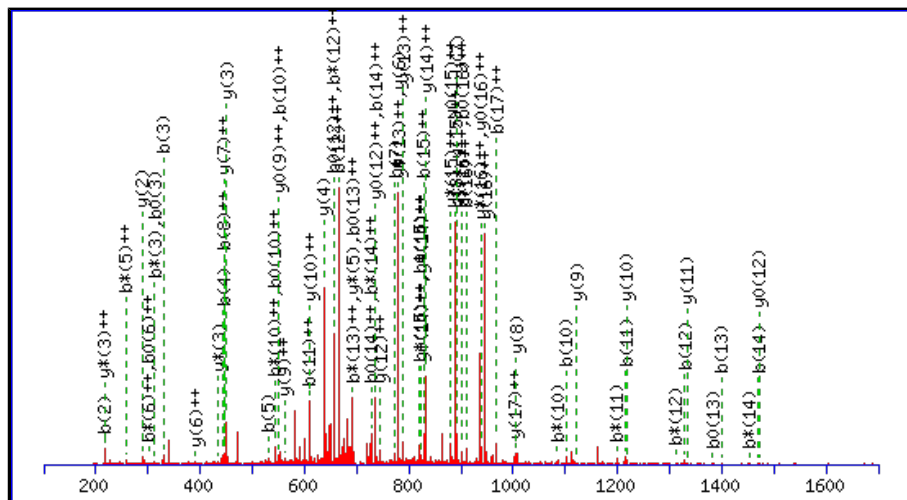

Monoisotopic mass of neutral peptide Mr(calc): 2106.0130

Fixed modifications: Carbamidomethyl (C) (apply to specified residues or termini only)

Variable modifications:

N4 : Deamidated (NQ)

Ions Score: 51 Expect: 0.0019

Matches : 74/186 fragment ions using 136 most intense peaks ([help](#))

| #  | b                | b <sup>++</sup> | b <sup>*</sup>   | b <sup>*++</sup> | b <sup>0</sup>   | b <sup>0++</sup> | Seq. | y                | y <sup>++</sup>  | y <sup>*</sup>  | y <sup>*++</sup> | y <sup>0</sup>   | y <sup>0++</sup> | #  |
|----|------------------|-----------------|------------------|------------------|------------------|------------------|------|------------------|------------------|-----------------|------------------|------------------|------------------|----|
| 1  | 102.0550         | 51.5311         |                  |                  | 84.0444          | 42.5258          | T    |                  |                  |                 |                  |                  |                  | 18 |
| 2  | <b>216.0979</b>  | 108.5526        | 199.0713         | 100.0393         | 198.0873         | 99.5473          | N    | 2005.9726        | <b>1003.4900</b> | 1988.9461       | 994.9767         | 1987.9621        | 994.4847         | 17 |
| 3  | <b>329.1819</b>  | 165.0946        | <b>312.1554</b>  | 156.5813         | <b>311.1714</b>  | 156.0893         | I    | 1891.9297        | <b>946.4685</b>  | 1874.9032       | <b>937.9552</b>  | 1873.9191        | <b>937.4632</b>  | 16 |
| 4  | <b>444.2089</b>  | 222.6081        | 427.1823         | 214.0948         | 426.1983         | 213.6028         | N    | 1778.8456        | <b>889.9265</b>  | 1761.8191       | <b>881.4132</b>  | 1760.8351        | <b>880.9212</b>  | 15 |
| 5  | <b>531.2409</b>  | 266.1241        | 514.2144         | <b>257.6108</b>  | 513.2304         | 257.1188         | S    | 1663.8187        | <b>832.4130</b>  | 1646.7921       | <b>823.8997</b>  | 1645.8081        | <b>823.4077</b>  | 14 |
| 6  | 618.2729         | 309.6401        | 601.2464         | <b>301.1268</b>  | 600.2624         | <b>300.6348</b>  | S    | 1576.7867        | <b>788.8970</b>  | 1559.7601       | <b>780.3837</b>  | 1558.7761        | <b>779.8917</b>  | 13 |
| 7  | <b>774.3741</b>  | 387.6907        | 757.3475         | 379.1774         | 756.3635         | 378.6854         | R    | 1489.7546        | <b>745.3810</b>  | 1472.7281       | 736.8677         | <b>1471.7441</b> | <b>736.3757</b>  | 12 |
| 8  | <b>889.4010</b>  | <b>445.2041</b> | 872.3745         | 436.6909         | 871.3904         | 436.1989         | D    | <b>1333.6535</b> | 667.3304         | 1316.6270       | 658.8171         | 1315.6430        | 658.3251         | 11 |
| 9  | 986.4538         | 493.7305        | 969.4272         | 485.2172         | 968.4432         | 484.7252         | P    | <b>1218.6266</b> | <b>609.8169</b>  | 1201.6000       | 601.3037         | 1200.6160        | 600.8116         | 10 |
| 10 | <b>1101.4807</b> | <b>551.2440</b> | <b>1084.4542</b> | <b>542.7307</b>  | 1083.4701        | <b>542.2387</b>  | D    | <b>1121.5738</b> | <b>561.2905</b>  | 1104.5473       | 552.7773         | 1103.5633        | <b>552.2853</b>  | 9  |
| 11 | <b>1215.5236</b> | <b>608.2655</b> | <b>1198.4971</b> | 599.7522         | 1197.5131        | 599.2602         | N    | <b>1006.5469</b> | 503.7771         | 989.5203        | 495.2638         |                  |                  | 8  |
| 12 | <b>1328.6077</b> | <b>664.8075</b> | <b>1311.5811</b> | <b>656.2942</b>  | 1310.5971        | <b>655.8022</b>  | I    | <b>892.5040</b>  | <b>446.7556</b>  | 875.4774        | 438.2423         |                  |                  | 7  |
| 13 | <b>1399.6448</b> | 700.3260        | <b>1382.6183</b> | <b>691.8128</b>  | <b>1381.6342</b> | <b>691.3208</b>  | A    | <b>779.4199</b>  | <b>390.2136</b>  | 762.3933        | 381.7003         |                  |                  | 6  |
| 14 | <b>1470.6819</b> | <b>735.8446</b> | <b>1453.6554</b> | <b>727.3313</b>  | 1452.6714        | <b>726.8393</b>  | A    | 708.3828         | 354.6950         | <b>691.3562</b> | 346.1817         |                  |                  | 5  |
| 15 | 1656.7612        | <b>828.8843</b> | 1639.7347        | <b>820.3710</b>  | 1638.7507        | <b>819.8790</b>  | W    | <b>637.3457</b>  | 319.1765         | 620.3191        | 310.6632         |                  |                  | 4  |
| 16 | 1819.8246        | <b>910.4159</b> | 1802.7980        | <b>901.9026</b>  | 1801.8140        | <b>901.4106</b>  | Y    | <b>451.2663</b>  | 226.1368         | <b>434.2398</b> | <b>217.6235</b>  |                  |                  | 3  |
| 17 | 1932.9086        | <b>966.9580</b> | 1915.8821        | 958.4447         | 1914.8981        | 957.9527         | L    | <b>288.2030</b>  | 144.6051         | 271.1765        | 136.0919         |                  |                  | 2  |
| 18 |                  |                 |                  |                  |                  |                  | R    | 175.1190         | 88.0631          | 158.0924        | 79.5498          |                  |                  | 1  |

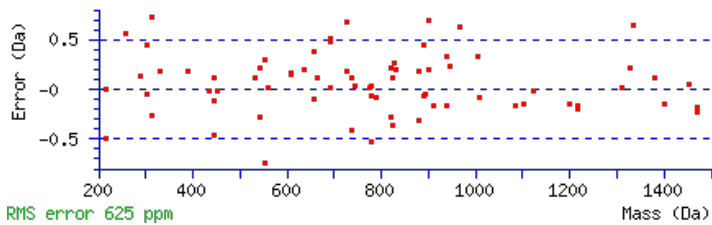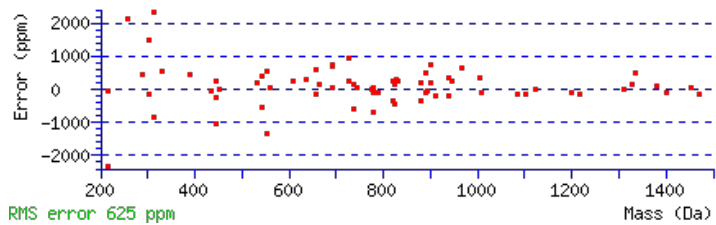

NCBI BLAST search of [TNINSSRDPDNIAAWYLR](#)

(Parameters: blastp, nr protein database, expect=20000, no filter, PAM30)

Other BLAST [web gateways](#)

**All matches to this query**

| Score | Mr(calc)  | Delta   | Sequence                           | Site Analysis         |
|-------|-----------|---------|------------------------------------|-----------------------|
| 51.5  | 2106.0130 | 0.0042  | <a href="#">TNINSSRDPDNIAAWYLR</a> | Deamidated N4 46.20%  |
| 49.7  | 2106.0130 | 0.0042  | <a href="#">TNINSSRDPDNIAAWYLR</a> | Deamidated N2 30.59%  |
| 48.5  | 2106.0130 | 0.0042  | <a href="#">TNINSSRDPDNIAAWYLR</a> | Deamidated N11 23.21% |
| 27.4  | 2106.0269 | -0.0097 | <a href="#">VNDTPNPFLLYEEALR</a>   |                       |
| 25.9  | 2106.0269 | -0.0097 | <a href="#">VNDTPNPFLLYEEALR</a>   |                       |
| 18.3  | 2106.0269 | -0.0097 | <a href="#">VNDTPNPFLLYEEALR</a>   |                       |
| 16.4  | 2106.0076 | 0.0096  | <a href="#">TIIDKRLQEDASSTQQR</a>  |                       |
| 12.1  | 2105.0236 | 0.9936  | <a href="#">TIIDKRLQEDASSTQQR</a>  |                       |
| 10.1  | 2105.0236 | 0.9936  | <a href="#">TIIDKRLQEDASSTQQR</a>  |                       |
| 9.0   | 2106.0262 | -0.0090 | <a href="#">MSLNELEILRNSAVSQER</a> |                       |

Mascot: <http://www.matrixscience.com/>

# MASCOT SCIENCE Mascot Search Results

## Peptide View

MS/MS Fragmentation of **MRPWKDPPSLLLLLKQSNSSK**

Found in **P12259** in **con\_Xuniprot\_HUMAN3**, FA5\_HUMAN Coagulation factor V OS=Homo sapiens GN=F5 PE=1 SV=4

Match to Query 21514: 2456.278536 from(615.076910,4+) intensity(11709.9590) rtinseconds(1070) scans(2570) index(24441)

Title: 111019\_Est\_MI\_YS\_G\_06Spectrum2219\_scans\_\_2570

Data file C:\mascot\20140703\_Tmgf\_1D\CSV\_UseAnalysis\MasterCSV\All\_Glyco\mgf\ptm\UC18ERLIC\_PTM\_35D.mgf

Click mouse within plot area to zoom in by factor of two about that point

Or, to Da

Label all possible matches Label matches used for scoring

Show Y-axis

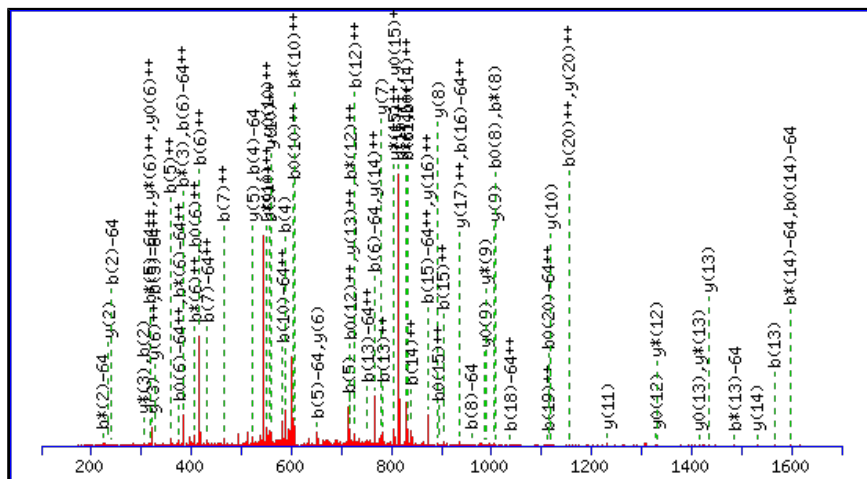

Monoisotopic mass of neutral peptide Mr(calc): 2456.2733

Fixed modifications: Carbamidomethyl (C) (apply to specified residues or termini only)

Variable modifications:

M1 : Oxidation (M), with neutral losses 0.0000(shown in table), 63.9983

N18 : Deamidated (NQ)

Ions Score: 42 Expect: 0.013

Matches : 80/334 fragment ions using 134 most intense peaks ([help](#))

| #  | b                | b <sup>++</sup>  | b <sup>*</sup>   | b <sup>*++</sup> | b <sup>0</sup>   | b <sup>0++</sup> | Seq. | y                | y <sup>++</sup>  | y <sup>*</sup>   | y <sup>*++</sup> | y <sup>0</sup>   | y <sup>0++</sup> | #  |
|----|------------------|------------------|------------------|------------------|------------------|------------------|------|------------------|------------------|------------------|------------------|------------------|------------------|----|
| 1  | 148.0427         | 74.5250          |                  |                  |                  |                  | M    |                  |                  |                  |                  |                  |                  | 21 |
| 2  | <b>304.1438</b>  | 152.5755         | 287.1172         | 144.0623         |                  |                  | R    | 2310.2452        | <b>1155.6262</b> | 2293.2187        | 1147.1130        | 2292.2347        | 1146.6210        | 20 |
| 3  | 401.1966         | 201.1019         | <b>384.1700</b>  | 192.5886         |                  |                  | P    | 2154.1441        | 1077.5757        | 2137.1176        | 1069.0624        | 2136.1335        | 1068.5704        | 19 |
| 4  | <b>587.2759</b>  | 294.1416         | 570.2493         | 285.6283         |                  |                  | W    | 2057.0913        | 1029.0493        | 2040.0648        | 1020.5360        | 2039.0808        | 1020.0440        | 18 |
| 5  | <b>715.3708</b>  | <b>358.1891</b>  | 698.3443         | 349.6758         |                  |                  | K    | 1871.0120        | <b>936.0097</b>  | 1853.9855        | 927.4964         | 1853.0015        | 927.0044         | 17 |
| 6  | <b>830.3978</b>  | <b>415.7025</b>  | 813.3712         | <b>407.1892</b>  | 812.3872         | <b>406.6972</b>  | D    | 1742.9171        | <b>871.9622</b>  | 1725.8905        | 863.4489         | 1724.9065        | 862.9569         | 16 |
| 7  | 927.4505         | <b>464.2289</b>  | 910.4240         | 455.7156         | 909.4400         | 455.2236         | P    | 1627.8901        | <b>814.4487</b>  | 1610.8636        | <b>805.9354</b>  | 1609.8796        | <b>805.4434</b>  | 15 |
| 8  | 1024.5033        | 512.7553         | <b>1007.4767</b> | 504.2420         | <b>1006.4927</b> | 503.7500         | P    | <b>1530.8374</b> | <b>765.9223</b>  | 1513.8108        | 757.4090         | 1512.8268        | 756.9170         | 14 |
| 9  | 1111.5353        | <b>556.2713</b>  | 1094.5088        | 547.7580         | 1093.5248        | 547.2660         | S    | <b>1433.7846</b> | <b>717.3959</b>  | <b>1416.7580</b> | 708.8827         | <b>1415.7740</b> | 708.3907         | 13 |
| 10 | 1226.5623        | 613.7848         | 1209.5357        | <b>605.2715</b>  | 1208.5517        | <b>604.7795</b>  | D    | 1346.7526        | 673.8799         | <b>1329.7260</b> | 665.3666         | <b>1328.7420</b> | 664.8746         | 12 |
| 11 | 1339.6463        | 670.3268         | 1322.6198        | 661.8135         | 1321.6358        | 661.3215         | L    | <b>1231.7256</b> | 616.3665         | 1214.6991        | 607.8532         | 1213.7151        | 607.3612         | 11 |
| 12 | 1452.7304        | <b>726.8688</b>  | 1435.7038        | <b>718.3556</b>  | 1434.7198        | <b>717.8636</b>  | L    | <b>1118.6416</b> | <b>559.8244</b>  | 1101.6150        | <b>551.3111</b>  | 1100.6310        | <b>550.8191</b>  | 10 |
| 13 | <b>1565.8145</b> | <b>783.4109</b>  | 1548.7879        | 774.8976         | 1547.8039        | 774.4056         | L    | <b>1005.5575</b> | 503.2824         | <b>988.5310</b>  | 494.7691         | <b>987.5469</b>  | 494.2771         | 9  |
| 14 | 1678.8985        | <b>839.9529</b>  | 1661.8720        | <b>831.4396</b>  | 1660.8880        | <b>830.9476</b>  | L    | <b>892.4734</b>  | 446.7404         | 875.4469         | 438.2271         | 874.4629         | 437.7351         | 8  |
| 15 | 1806.9935        | <b>904.0004</b>  | 1789.9669        | 895.4871         | 1788.9829        | <b>894.9951</b>  | K    | <b>779.3894</b>  | 390.1983         | 762.3628         | 381.6850         | 761.3788         | 381.1930         | 7  |
| 16 | 1935.0521        | 968.0297         | 1918.0255        | 959.5164         | 1917.0415        | 959.0244         | Q    | <b>651.2944</b>  | <b>326.1508</b>  | 634.2679         | <b>317.6376</b>  | 633.2838         | <b>317.1456</b>  | 6  |
| 17 | 2022.0841        | 1011.5457        | 2005.0575        | 1003.0324        | 2004.0735        | 1002.5404        | S    | <b>523.2358</b>  | 262.1216         | 506.2093         | 253.6083         | 505.2253         | 253.1163         | 5  |
| 18 | 2137.1110        | 1069.0592        | 2120.0845        | 1060.5459        | 2119.1005        | 1060.0539        | N    | 436.2038         | 218.6055         | 419.1773         | 210.0923         | 418.1932         | 209.6003         | 4  |
| 19 | 2224.1431        | <b>1112.5752</b> | 2207.1165        | 1104.0619        | 2206.1325        | 1103.5699        | S    | <b>321.1769</b>  | 161.0921         | <b>304.1503</b>  | 152.5788         | 303.1663         | 152.0868         | 3  |
| 20 | 2311.1751        | <b>1156.0912</b> | 2294.1485        | 1147.5779        | 2293.1645        | 1147.0859        | S    | <b>234.1448</b>  | 117.5761         | 217.1183         | 109.0628         | 216.1343         | 108.5708         | 2  |
| 21 |                  |                  |                  |                  |                  |                  | K    | 147.1128         | 74.0600          | 130.0863         | 65.5468          |                  |                  | 1  |

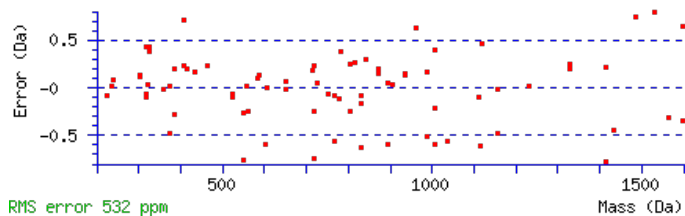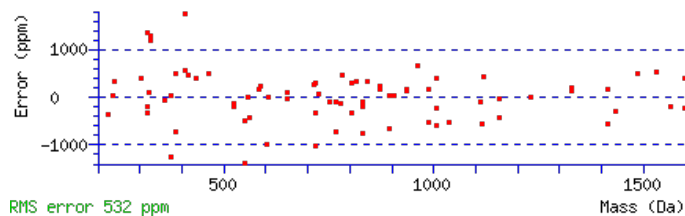

NCBI BLAST search of [MRPWKDPPSDLLLLKQSNSSK](#)

(Parameters: blastp, nr protein database, expect=20000, no filter, PAM30)

Other BLAST [web gateways](#)

All matches to this query

| Score | Mr(calc)  | Delta   | Sequence                                | Site Analysis         |
|-------|-----------|---------|-----------------------------------------|-----------------------|
| 42.4  | 2456.2733 | 0.0052  | <a href="#">MRPWKDPPSDLLLLKQSNSSK</a>   | Deamidated N18 57.03% |
| 41.1  | 2456.2733 | 0.0052  | <a href="#">MRPWKDPPSDLLLLKQSNSSK</a>   | Deamidated Q16 42.97% |
| 10.1  | 2456.2897 | -0.0111 | <a href="#">KNLETQKEIAEDELVAEALLK</a>   |                       |
| 6.5   | 2455.2853 | 0.9933  | <a href="#">DMERLTSLRAGIEGPLLASDVGR</a> |                       |
| 6.0   | 2456.2702 | 0.0084  | <a href="#">MQVMNLNVPMPGILVQRQSK</a>    |                       |
| 5.6   | 2455.2861 | 0.9924  | <a href="#">MQVMNLNVPMPGILVQRQSK</a>    |                       |
| 5.6   | 2455.2861 | 0.9924  | <a href="#">MQVMNLNVPMPGILVQRQSK</a>    |                       |
| 4.3   | 2454.2676 | 2.0110  | <a href="#">VADEQGALEPTEMLQLLAVTGLR</a> |                       |
| 4.2   | 2456.2832 | -0.0047 | <a href="#">LQMVELTDAQQVROLLVTQK</a>    |                       |
| 3.5   | 2456.2832 | -0.0047 | <a href="#">LQMVELTDAQQVROLLVTQK</a>    |                       |

Mascot: <http://www.matrixscience.com/>

# MATRIX SCIENCE Mascot Search Results

## Peptide View

MS/MS Fragmentation of **TYEDDSPEWFKEDNAVQPNSSYTYVWHATER**

Found in **P12259** in **con\_Xuniprot\_HUMAN3**, FA5\_HUMAN Coagulation factor V OS=Homo sapiens GN=F5 PE=1 SV=4

Match to Query 28064: 3764.631616 from(942.165180,4+) intensity(29439.2773) rtinseconds(1810) scans(4771) index(24001)

Title: 111019\_Est\_ML\_YS\_G\_05Spectrum4128\_scans\_\_4771

Data file C:\mascot\20140703\_Tmgf\_1D\CSV\_UseAnalysis\MasterCSV\All\_Glyco\mgf\ptm\UC18ERLIC\_PTM\_35D.mgf

Click mouse within plot area to zoom in by factor of two about that point

Or, to Da

Label all possible matches Label matches used for scoring

Show Y-axis

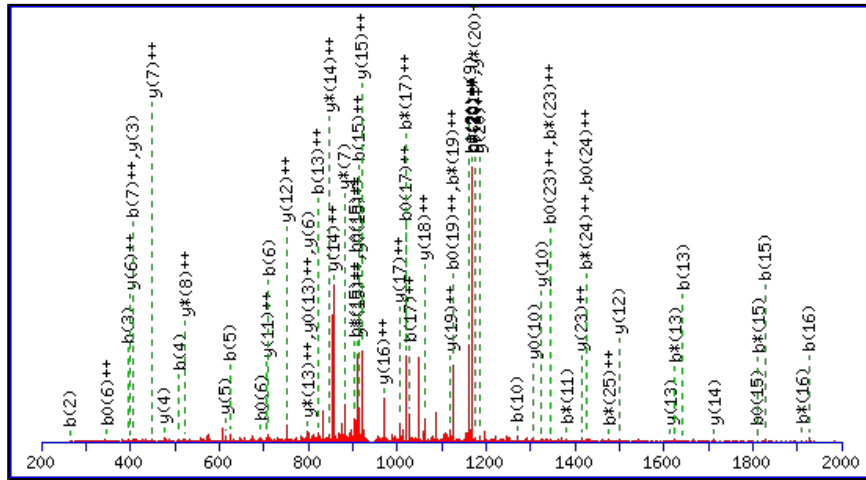

Monoisotopic mass of neutral peptide Mr(calc): 3764.6179

Fixed modifications: Carbamidomethyl (C) (apply to specified residues or termini only)

Variable modifications:

N19 : Deamidated (NQ)

Ions Score: 41 Expect: 0.0046

Matches : 64/338 fragment ions using 154 most intense peaks ([help](#))

| #  | b                | b <sup>++</sup>  | b <sup>*</sup>   | b <sup>*++</sup> | b <sup>0</sup>   | b <sup>0++</sup> | Seq. | y                | y <sup>++</sup>  | y <sup>*</sup> | y <sup>*++</sup> | y <sup>0</sup>   | y <sup>0++</sup> | #  |
|----|------------------|------------------|------------------|------------------|------------------|------------------|------|------------------|------------------|----------------|------------------|------------------|------------------|----|
| 1  | 102.0550         | 51.5311          |                  |                  | 84.0444          | 42.5258          | T    |                  |                  |                |                  |                  |                  | 31 |
| 2  | <b>265.1183</b>  | 133.0628         |                  |                  | 247.1077         | 124.0575         | Y    | 3664.5775        | 1832.7924        | 3647.5510      | 1824.2791        | 3646.5670        | 1823.7871        | 30 |
| 3  | <b>394.1609</b>  | 197.5841         |                  |                  | 376.1503         | 188.5788         | E    | 3501.5142        | 1751.2607        | 3484.4877      | 1742.7475        | 3483.5036        | 1742.2555        | 29 |
| 4  | <b>509.1878</b>  | 255.0975         |                  |                  | 491.1773         | 246.0923         | D    | 3372.4716        | 1686.7394        | 3355.4451      | 1678.2262        | 3354.4610        | 1677.7342        | 28 |
| 5  | <b>624.2148</b>  | 312.6110         |                  |                  | 606.2042         | 303.6057         | D    | 3257.4447        | 1629.2260        | 3240.4181      | 1620.7127        | 3239.4341        | 1620.2207        | 27 |
| 6  | <b>711.2468</b>  | 356.1270         |                  |                  | <b>693.2362</b>  | <b>347.1218</b>  | S    | 3142.4177        | 1571.7125        | 3125.3912      | 1563.1992        | 3124.4072        | 1562.7072        | 26 |
| 7  | 808.2996         | <b>404.6534</b>  |                  |                  | 790.2890         | 395.6481         | P    | 3055.3857        | 1528.1965        | 3038.3591      | 1519.6832        | 3037.3751        | 1519.1912        | 25 |
| 8  | 937.3421         | 469.1747         |                  |                  | 919.3316         | 460.1694         | E    | 2958.3329        | 1479.6701        | 2941.3064      | 1471.1568        | 2940.3224        | 1470.6648        | 24 |
| 9  | 1123.4215        | 562.2144         |                  |                  | 1105.4109        | 553.2091         | W    | 2829.2903        | <b>1415.1488</b> | 2812.2638      | 1406.6355        | 2811.2798        | 1406.1435        | 23 |
| 10 | <b>1270.4899</b> | 635.7486         |                  |                  | 1252.4793        | 626.7433         | F    | 2643.2110        | 1322.1091        | 2626.1845      | 1313.5959        | 2625.2005        | 1313.1039        | 22 |
| 11 | 1398.5848        | 699.7961         | <b>1381.5583</b> | 691.2828         | 1380.5743        | 690.7908         | K    | 2496.1426        | 1248.5749        | 2479.1161      | 1240.0617        | 2478.1320        | 1239.5697        | 21 |
| 12 | 1527.6274        | 764.3174         | 1510.6009        | 755.8041         | 1509.6169        | 755.3121         | E    | 2368.0476        | <b>1184.5275</b> | 2351.0211      | <b>1176.0142</b> | 2350.0371        | <b>1175.5222</b> | 20 |
| 13 | <b>1642.6544</b> | <b>821.8308</b>  | <b>1625.6278</b> | 813.3176         | 1624.6438        | 812.8255         | D    | 2239.0051        | <b>1120.0062</b> | 2221.9785      | 1111.4929        | 2220.9945        | 1111.0009        | 19 |
| 14 | 1756.6973        | 878.8523         | 1739.6708        | 870.3390         | 1738.6867        | 869.8470         | N    | 2123.9781        | <b>1062.4927</b> | 2106.9516      | 1053.9794        | 2105.9675        | 1053.4874        | 18 |
| 15 | <b>1827.7344</b> | <b>914.3708</b>  | <b>1810.7079</b> | <b>905.8576</b>  | <b>1809.7239</b> | <b>905.3656</b>  | A    | 2009.9352        | <b>1005.4712</b> | 1992.9086      | 996.9580         | 1991.9246        | 996.4659         | 17 |
| 16 | <b>1926.8028</b> | 963.9051         | <b>1909.7763</b> | 955.3918         | 1908.7923        | 954.8998         | V    | 1938.8981        | <b>969.9527</b>  | 1921.8715      | 961.4394         | 1920.8875        | 960.9474         | 16 |
| 17 | 2054.8614        | <b>1027.9343</b> | 2037.8349        | <b>1019.4211</b> | 2036.8508        | <b>1018.9291</b> | Q    | 1839.8297        | <b>920.4185</b>  | 1822.8031      | <b>911.9052</b>  | 1821.8191        | <b>911.4132</b>  | 15 |
| 18 | 2151.9142        | 1076.4607        | 2134.8876        | 1067.9474        | 2133.9036        | 1067.4554        | P    | <b>1711.7711</b> | <b>856.3892</b>  | 1694.7445      | <b>847.8759</b>  | 1693.7605        | 847.3839         | 14 |
| 19 | 2266.9411        | 1133.9742        | 2249.9146        | <b>1125.4609</b> | 2248.9305        | <b>1124.9689</b> | N    | <b>1614.7183</b> | 807.8628         | 1597.6918      | <b>799.3495</b>  | 1596.7077        | <b>798.8575</b>  | 13 |
| 20 | 2353.9731        | 1177.4902        | 2336.9466        | <b>1168.9769</b> | 2335.9626        | <b>1168.4849</b> | S    | <b>1499.6914</b> | <b>750.3493</b>  | 1482.6648      | 741.8360         | 1481.6808        | 741.3440         | 12 |
| 21 | 2441.0052        | 1221.0062        | 2423.9786        | 1212.4929        | 2422.9946        | 1212.0009        | S    | 1412.6593        | <b>706.8333</b>  | 1395.6328      | 698.3200         | 1394.6488        | 697.8280         | 11 |
| 22 | 2604.0685        | 1302.5379        | 2587.0419        | 1294.0246        | 2586.0579        | 1293.5326        | Y    | <b>1325.6273</b> | 663.3173         | 1308.6008      | 654.8040         | <b>1307.6167</b> | 654.3120         | 10 |
| 23 | 2705.1162        | 1353.0617        | 2688.0896        | <b>1344.5485</b> | 2687.1056        | <b>1344.0564</b> | T    | <b>1162.5640</b> | 581.7856         | 1145.5374      | 573.2724         | 1144.5534        | 572.7803         | 9  |

|    |           |           |           |           |           |           |   |           |          |           |          |           |          |   |
|----|-----------|-----------|-----------|-----------|-----------|-----------|---|-----------|----------|-----------|----------|-----------|----------|---|
| 24 | 2868.1795 | 1434.5934 | 2851.1530 | 1426.0801 | 2850.1689 | 1425.5881 | Y | 1061.5163 | 531.2618 | 1044.4898 | 522.7485 | 1043.5057 | 522.2565 | 8 |
| 25 | 2967.2479 | 1484.1276 | 2950.2214 | 1475.6143 | 2949.2374 | 1475.1223 | V | 898.4530  | 449.7301 | 881.4264  | 441.2169 | 880.4424  | 440.7248 | 7 |
| 26 | 3153.3272 | 1577.1673 | 3136.3007 | 1568.6540 | 3135.3167 | 1568.1620 | W | 799.3846  | 400.1959 | 782.3580  | 391.6826 | 781.3740  | 391.1906 | 6 |
| 27 | 3290.3861 | 1645.6967 | 3273.3596 | 1637.1834 | 3272.3756 | 1636.6914 | H | 613.3053  | 307.1563 | 596.2787  | 298.6430 | 595.2947  | 298.1510 | 5 |
| 28 | 3361.4233 | 1681.2153 | 3344.3967 | 1672.7020 | 3343.4127 | 1672.2100 | A | 476.2463  | 238.6268 | 459.2198  | 230.1135 | 458.2358  | 229.6215 | 4 |
| 29 | 3462.4709 | 1731.7391 | 3445.4444 | 1723.2258 | 3444.4604 | 1722.7338 | T | 405.2092  | 203.1082 | 388.1827  | 194.5950 | 387.1987  | 194.1030 | 3 |
| 30 | 3591.5135 | 1796.2604 | 3574.4870 | 1787.7471 | 3573.5030 | 1787.2551 | E | 304.1615  | 152.5844 | 287.1350  | 144.0711 | 286.1510  | 143.5791 | 2 |
| 31 |           |           |           |           |           |           | R | 175.1190  | 88.0631  | 158.0924  | 79.5498  |           |          | 1 |

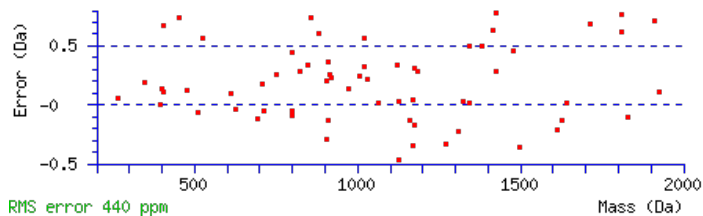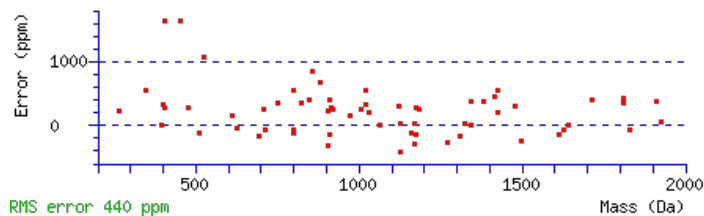

NCBI BLAST search of [TYEDDSPFWFKEDNAVQPNSSYTYVWHATER](#)

(Parameters: blastp, nr protein database, expect=20000, no filter, PAM30)

Other BLAST [web gateways](#)

All matches to this query

| Score | Mr(calc)  | Delta   | Sequence                                           | Site Analysis         |
|-------|-----------|---------|----------------------------------------------------|-----------------------|
| 41.3  | 3764.6179 | 0.0137  | <a href="#">TYEDDSPFWFKEDNAVQPNSSYTYVWHATER</a>    | Deamidated N19 49.82% |
| 38.7  | 3764.6179 | 0.0137  | <a href="#">TYEDDSPFWFKEDNAVQPNSSYTYVWHATER</a>    | Deamidated Q17 27.25% |
| 37.9  | 3764.6179 | 0.0137  | <a href="#">TYEDDSPFWFKEDNAVQPNSSYTYVWHATER</a>    | Deamidated N14 22.93% |
| 32.3  | 3763.6339 | 0.9977  | <a href="#">TYEDDSPFWFKEDNAVQPNSSYTYVWHATER</a>    |                       |
| 10.2  | 3764.6467 | -0.0151 | <a href="#">AFLEDGGPFVMSNSPDTLEYNMQLCLCGLSDR</a>   |                       |
| 10.0  | 3764.6157 | 0.0160  | <a href="#">SEGEQQLKPNNSNAPNEDQEEIQQSEQHTPAR</a>   |                       |
| 8.5   | 3764.6157 | 0.0160  | <a href="#">SEGEQQLKPNNSNAPNEDQEEIQQSEQHTPAR</a>   |                       |
| 7.8   | 3763.6317 | 1.0000  | <a href="#">SEGEQQLKPNNSNAPNEDQEEIQQSEQHTPAR</a>   |                       |
| 7.8   | 3763.6317 | 1.0000  | <a href="#">SEGEQQLKPNNSNAPNEDQEEIQQSEQHTPAR</a>   |                       |
| 5.6   | 3762.6349 | 1.9967  | <a href="#">GRMDNEHVSAVLTWGGGGSTMDCFTQYIVGNETR</a> |                       |

Mascot: <http://www.matrixscience.com/>

# MASCOT SCIENCE Mascot Search Results

## Peptide View

MS/MS Fragmentation of **VLNFTTK**

Found in **P13671** in **con\_Xuniprot\_HUMAN3**, CO6\_HUMAN Complement component C6 OS=Homo sapiens GN=C6 PE=1 SV=3

Match to Query 1: 822.449668 from(412.232110,2+) intensity(88312.2813) rtinseconds(613) scans(1300) index(5013)

Title: 111019\_Est\_ISCardio\_NMI\_YP\_G\_8Spectrum1120\_scans\_\_1300

Data file C:\mascot\20140703\_Tmgf\_1D\CSV\_UseAnalysis\MasterCSV\All\_Glyco\mgf\ptm\UC18ERIC\_PTM\_35D.mgf

Click mouse within plot area to zoom in by factor of two about that point

Or, to Da

Label all possible matches Label matches used for scoring

Show Y-axis

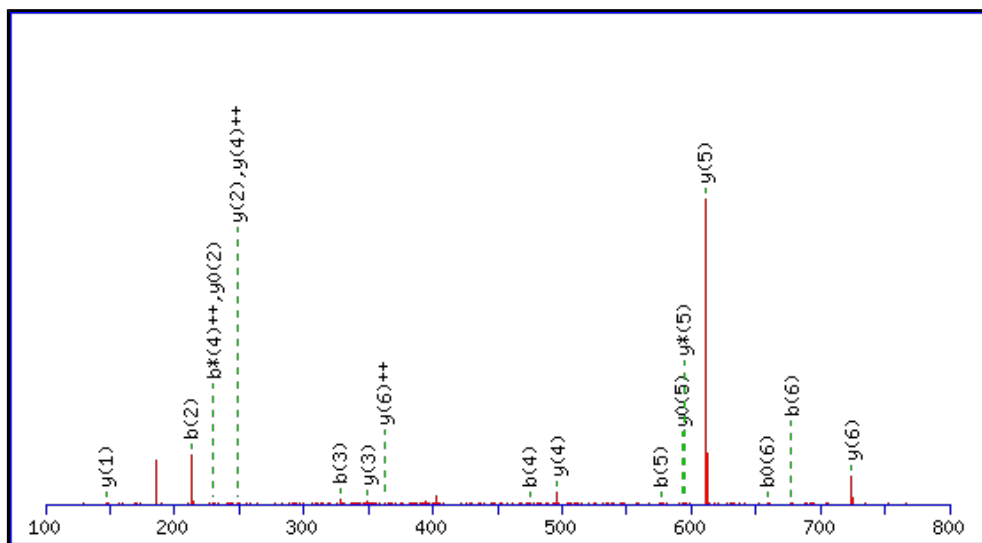

Monoisotopic mass of neutral peptide Mr(calc): 822.4487

Fixed modifications: Carbamidomethyl (C) (apply to specified residues or termini only)

Variable modifications:

N3 : Deamidated (NQ)

Ions Score: 37 Expect: 0.024

Matches : 18/58 fragment ions using 34 most intense peaks ([help](#))

| # | b               | b <sup>++</sup> | b*       | b <sup>+++</sup> | b <sup>0</sup>  | b <sup>0++</sup> | Seq. | y               | y <sup>++</sup> | y*              | y <sup>+++</sup> | y <sup>0</sup>  | y <sup>0++</sup> | # |
|---|-----------------|-----------------|----------|------------------|-----------------|------------------|------|-----------------|-----------------|-----------------|------------------|-----------------|------------------|---|
| 1 | 100.0757        | 50.5415         |          |                  |                 |                  | V    |                 |                 |                 |                  |                 |                  | 7 |
| 2 | <b>213.1598</b> | 107.0835        |          |                  |                 |                  | L    | <b>724.3876</b> | <b>362.6974</b> | 707.3610        | 354.1842         | 706.3770        | 353.6921         | 6 |
| 3 | <b>328.1867</b> | 164.5970        | 311.1601 | 156.0837         |                 |                  | N    | <b>611.3035</b> | 306.1554        | <b>594.2770</b> | 297.6421         | <b>593.2930</b> | 297.1501         | 5 |
| 4 | <b>475.2551</b> | 238.1312        | 458.2286 | <b>229.6179</b>  |                 |                  | F    | <b>496.2766</b> | <b>248.6419</b> | 479.2500        | 240.1287         | 478.2660        | 239.6366         | 4 |
| 5 | <b>576.3028</b> | 288.6550        | 559.2762 | 280.1418         | 558.2922        | 279.6498         | T    | <b>349.2082</b> | 175.1077        | 332.1816        | 166.5944         | 331.1976        | 166.1024         | 3 |
| 6 | <b>677.3505</b> | 339.1789        | 660.3239 | 330.6656         | <b>659.3399</b> | 330.1736         | T    | <b>248.1605</b> | 124.5839        | 231.1339        | 116.0706         | <b>230.1499</b> | 115.5786         | 2 |
| 7 |                 |                 |          |                  |                 |                  | K    | <b>147.1128</b> | 74.0600         | 130.0863        | 65.5468          |                 |                  | 1 |

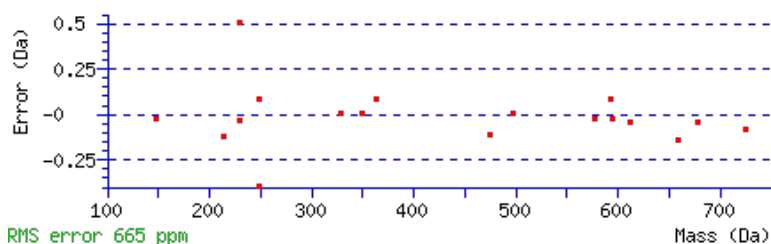



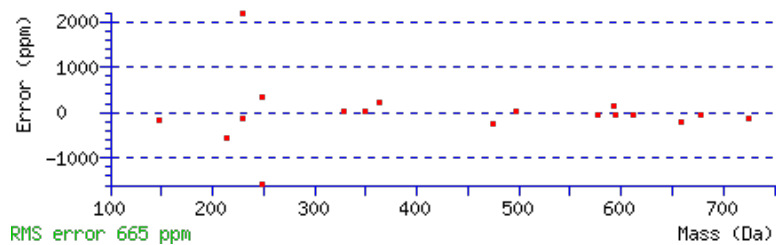

NCBI **BLAST** search of [VLNETTK](#)

(Parameters: blastp, nr protein database, expect=20000, no filter, PAM30)

Other BLAST [web gateways](#)

**All matches to this query**

| Score | Mr(calc) | Delta  | Sequence                 |
|-------|----------|--------|--------------------------|
| 37.1  | 822.4487 | 0.0010 | <a href="#">VLNETTK</a>  |
| 13.1  | 822.4487 | 0.0009 | <a href="#">VITDTEK</a>  |
| 4.5   | 820.4416 | 2.0081 | <a href="#">PAARGGHR</a> |

**Mascot:** <http://www.matrixscience.com/>

# MASCOT SCIENCE Mascot Search Results

## Peptide View

MS/MS Fragmentation of **IGGIWTWVGTNK**

Found in **P14151** in **con\_Xuniprot\_HUMAN3**, LYAM1\_HUMAN L-selectin OS=Homo sapiens GN=SELL PE=1 SV=2

Match to Query 2018: 1331.691368 from(666.852960,2+) intensity(32922.0000) rtinseconds(1967) scans(5047) index(26832)

Title: 111019\_Est\_MI\_YS\_G\_09Spectrum4392\_scans\_\_5047

Data file C:\\mascot\\20140703\_Tmgf\_1D\\CSV\_UseAnalysis\\MasterCSV\\All\_Glyco\\mgf\\ptm\\UC18ERLIC\_PTM\_35D.mgf

Click mouse within plot area to zoom in by factor of two about that point

Or, to Da

Label all possible matches Label matches used for scoring

Show Y-axis

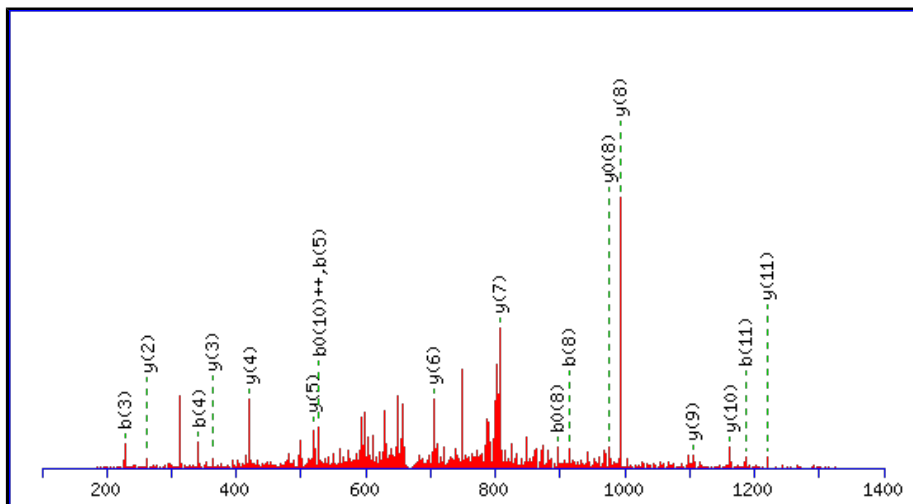

Monoisotopic mass of neutral peptide  $M_r(\text{calc})$ : 1331.6874

Fixed modifications: Carbamidomethyl (C) (apply to specified residues or termini only)

Variable modifications:

N11 : Deamidated (NQ)

Ions Score: 69 Expect: 3.5e-005

Matches : 18/98 fragment ions using 36 most intense peaks ([help](#))

| #  | b         | b <sup>++</sup> | b <sup>*</sup> | b <sup>*++</sup> | b <sup>0</sup> | b <sup>0++</sup> | Seq. | y         | y <sup>++</sup> | y <sup>*</sup> | y <sup>*++</sup> | y <sup>0</sup> | y <sup>0++</sup> | #  |
|----|-----------|-----------------|----------------|------------------|----------------|------------------|------|-----------|-----------------|----------------|------------------|----------------|------------------|----|
| 1  | 114.0913  | 57.5493         |                |                  |                |                  | I    |           |                 |                |                  |                |                  | 12 |
| 2  | 171.1128  | 86.0600         |                |                  |                |                  | G    | 1219.6106 | 610.3089        | 1202.5841      | 601.7957         | 1201.6000      | 601.3037         | 11 |
| 3  | 228.1343  | 114.5708        |                |                  |                |                  | G    | 1162.5891 | 581.7982        | 1145.5626      | 573.2849         | 1144.5786      | 572.7929         | 10 |
| 4  | 341.2183  | 171.1128        |                |                  |                |                  | I    | 1105.5677 | 553.2875        | 1088.5411      | 544.7742         | 1087.5571      | 544.2822         | 9  |
| 5  | 527.2976  | 264.1525        |                |                  |                |                  | W    | 992.4836  | 496.7454        | 975.4571       | 488.2322         | 974.4730       | 487.7402         | 8  |
| 6  | 628.3453  | 314.6763        |                |                  | 610.3348       | 305.6710         | T    | 806.4043  | 403.7058        | 789.3777       | 395.1925         | 788.3937       | 394.7005         | 7  |
| 7  | 814.4246  | 407.7160        |                |                  | 796.4141       | 398.7107         | W    | 705.3566  | 353.1819        | 688.3301       | 344.6687         | 687.3461       | 344.1767         | 6  |
| 8  | 913.4931  | 457.2502        |                |                  | 895.4825       | 448.2449         | V    | 519.2773  | 260.1423        | 502.2508       | 251.6290         | 501.2667       | 251.1370         | 5  |
| 9  | 970.5145  | 485.7609        |                |                  | 952.5040       | 476.7556         | G    | 420.2089  | 210.6081        | 403.1823       | 202.0948         | 402.1983       | 201.6028         | 4  |
| 10 | 1071.5622 | 536.2847        |                |                  | 1053.5516      | 527.2795         | T    | 363.1874  | 182.0974        | 346.1609       | 173.5841         | 345.1769       | 173.0921         | 3  |
| 11 | 1186.5891 | 593.7982        | 1169.5626      | 585.2849         | 1168.5786      | 584.7929         | N    | 262.1397  | 131.5735        | 245.1132       | 123.0602         |                |                  | 2  |
| 12 |           |                 |                |                  |                |                  | K    | 147.1128  | 74.0600         | 130.0863       | 65.5468          |                |                  | 1  |

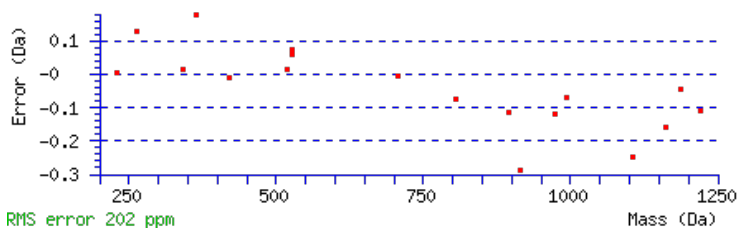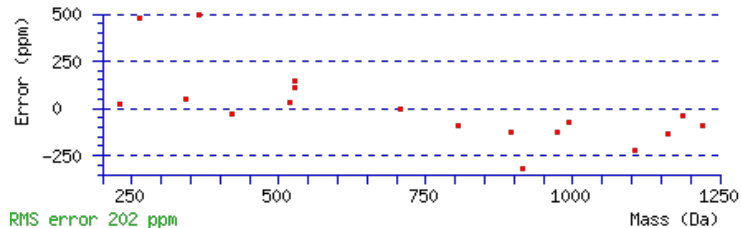

NCBI **BLAST** search of [IGGIWTWVGTNK](#)

(Parameters: blastp, nr protein database, expect=20000, no filter, PAM30)

Other BLAST [web gateways](#)

**All matches to this query**

| Score | Mr(calc)  | Delta   | Sequence                       |
|-------|-----------|---------|--------------------------------|
| 68.6  | 1331.6874 | 0.0040  | <a href="#">IGGIWTWVGTNK</a>   |
| 11.9  | 1329.6889 | 2.0025  | <a href="#">KPQTLGGTQGTGGK</a> |
| 9.1   | 1331.6932 | -0.0019 | <a href="#">NLLITADNSKDK</a>   |
| 8.5   | 1331.6906 | 0.0008  | <a href="#">AVQRSSQRGTDK</a>   |
| 7.5   | 1331.6932 | -0.0018 | <a href="#">LNISADKENSIK</a>   |
| 6.7   | 1330.6888 | 1.0026  | <a href="#">MGGLGPRRAGTSR</a>  |
| 5.8   | 1329.6889 | 2.0025  | <a href="#">KPQTLGGTQGTGGK</a> |
| 5.2   | 1329.6902 | 2.0012  | <a href="#">QPHARDPVAPSR</a>   |
| 5.1   | 1331.6932 | -0.0019 | <a href="#">VKDVGSNIKDEK</a>   |
| 4.8   | 1331.6867 | 0.0046  | <a href="#">LLANVQCLGTSR</a>   |

**Mascot:** <http://www.matrixscience.com/>

# MASCOT SCIENCE Mascot Search Results

## Peptide View

MS/MS Fragmentation of **FCRDNYTDLVAIQNK**

Found in **P14151** in **con\_Xuniprot\_HUMAN3**, LYAM1\_HUMAN L-selectin OS=Homo sapiens GN=SELL PE=1 SV=2

Match to Query 10970: 1856.878902 from(619.966910,3+) intensity(33575.8125) rtinseconds(1211) scans(2814) index(12496)

Title: 111019\_Est\_ISCardio\_NMI\_YS\_G\_9Spectrum2444\_scans\_\_2814

Data file C:\\mascot\\20140703\_Tmgf\_1D\\CSV\_UseAnalysis\\MasterCSV\\All\_Glyco\\mgf\\ptm\\UC18ERLIC\_PTM\_35D.mgf

Click mouse within plot area to zoom in by factor of two about that point

Or, to Da

Label all possible matches Label matches used for scoring

Show Y-axis

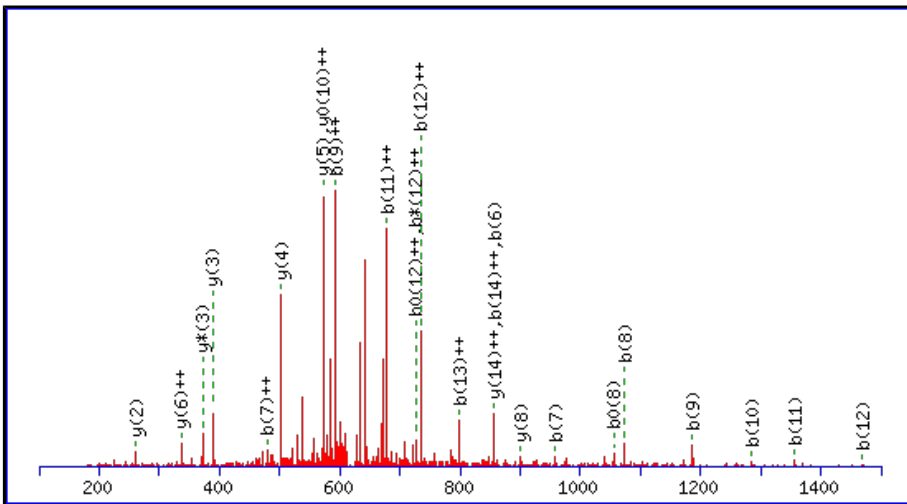

Monoisotopic mass of neutral peptide Mr(calc): 1856.8727

Fixed modifications: Carbamidomethyl (C) (apply to specified residues or termini only)

Variable modifications:

N5 : Deamidated (NQ)

Ions Score: 50 Expect: 0.0023

Matches : 25/144 fragment ions using 26 most intense peaks ([help](#))

| #  | b         | b <sup>++</sup> | b <sup>*</sup> | b <sup>*++</sup> | b <sup>0</sup> | b <sup>0++</sup> | Seq. | y         | y <sup>++</sup> | y <sup>*</sup> | y <sup>*++</sup> | y <sup>0</sup> | y <sup>0++</sup> | #  |
|----|-----------|-----------------|----------------|------------------|----------------|------------------|------|-----------|-----------------|----------------|------------------|----------------|------------------|----|
| 1  | 148.0757  | 74.5415         |                |                  |                |                  | F    |           |                 |                |                  |                |                  | 15 |
| 2  | 308.1063  | 154.5568        |                |                  |                |                  | C    | 1710.8116 | 855.9094        | 1693.7850      | 847.3961         | 1692.8010      | 846.9041         | 14 |
| 3  | 464.2074  | 232.6074        | 447.1809       | 224.0941         |                |                  | R    | 1550.7809 | 775.8941        | 1533.7544      | 767.3808         | 1532.7703      | 766.8888         | 13 |
| 4  | 579.2344  | 290.1208        | 562.2078       | 281.6076         | 561.2238       | 281.1156         | D    | 1394.6798 | 697.8435        | 1377.6533      | 689.3303         | 1376.6692      | 688.8383         | 12 |
| 5  | 694.2613  | 347.6343        | 677.2348       | 339.1210         | 676.2508       | 338.6290         | N    | 1279.6529 | 640.3301        | 1262.6263      | 631.8168         | 1261.6423      | 631.3248         | 11 |
| 6  | 857.3247  | 429.1660        | 840.2981       | 420.6527         | 839.3141       | 420.1607         | Y    | 1164.6259 | 582.8166        | 1147.5994      | 574.3033         | 1146.6154      | 573.8113         | 10 |
| 7  | 958.3723  | 479.6898        | 941.3458       | 471.1765         | 940.3618       | 470.6845         | T    | 1001.5626 | 501.2849        | 984.5360       | 492.7717         | 983.5520       | 492.2796         | 9  |
| 8  | 1073.3993 | 537.2033        | 1056.3727      | 528.6900         | 1055.3887      | 528.1980         | D    | 900.5149  | 450.7611        | 883.4884       | 442.2478         | 882.5043       | 441.7558         | 8  |
| 9  | 1186.4834 | 593.7453        | 1169.4568      | 585.2320         | 1168.4728      | 584.7400         | L    | 785.4880  | 393.2476        | 768.4614       | 384.7343         |                |                  | 7  |
| 10 | 1285.5518 | 643.2795        | 1268.5252      | 634.7662         | 1267.5412      | 634.2742         | V    | 672.4039  | 336.7056        | 655.3774       | 328.1923         |                |                  | 6  |
| 11 | 1356.5889 | 678.7981        | 1339.5623      | 670.2848         | 1338.5783      | 669.7928         | A    | 573.3355  | 287.1714        | 556.3089       | 278.6581         |                |                  | 5  |
| 12 | 1469.6729 | 735.3401        | 1452.6464      | 726.8268         | 1451.6624      | 726.3348         | I    | 502.2984  | 251.6528        | 485.2718       | 243.1395         |                |                  | 4  |
| 13 | 1597.7315 | 799.3694        | 1580.7050      | 790.8561         | 1579.7210      | 790.3641         | Q    | 389.2143  | 195.1108        | 372.1878       | 186.5975         |                |                  | 3  |
| 14 | 1711.7744 | 856.3909        | 1694.7479      | 847.8776         | 1693.7639      | 847.3856         | N    | 261.1557  | 131.0815        | 244.1292       | 122.5682         |                |                  | 2  |
| 15 |           |                 |                |                  |                |                  | K    | 147.1128  | 74.0600         | 130.0863       | 65.5468          |                |                  | 1  |

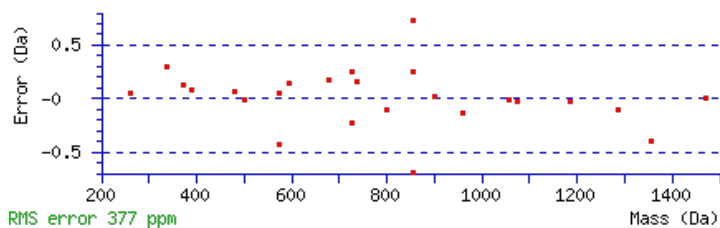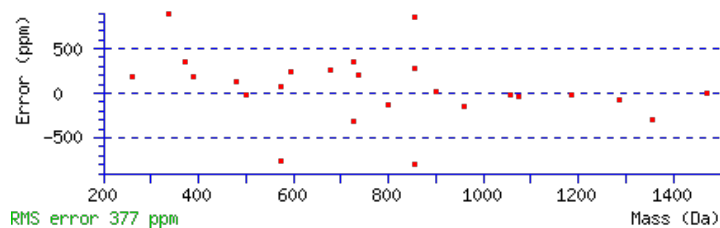

NCBI BLAST search of [FCRDNYTDLVAIQNK](#)

(Parameters: blastp, nr protein database, expect=20000, no filter, PAM30)

Other BLAST [web gateways](#)

**All matches to this query**

| Score | Mr(calc)  | Delta   | Sequence                           | Site Analysis        |
|-------|-----------|---------|------------------------------------|----------------------|
| 49.6  | 1856.8727 | 0.0062  | <a href="#">FCRDNYTDLVAIQNK</a>    | Deamidated N5 99.51% |
| 23.5  | 1856.8727 | 0.0062  | <a href="#">FCRDNYTDLVAIQNK</a>    | Deamidated Q13 0.25% |
| 23.4  | 1856.8727 | 0.0062  | <a href="#">FCRDNYTDLVAIQNK</a>    | Deamidated N14 0.24% |
| 19.7  | 1855.8734 | 1.0055  | <a href="#">NEVCAPASQPSVVQGANK</a> |                      |
| 17.0  | 1855.8734 | 1.0055  | <a href="#">NEVCAPASQPSVVQGANK</a> |                      |
| 14.5  | 1855.8734 | 1.0055  | <a href="#">NEVCAPASQPSVVQGANK</a> |                      |
| 9.7   | 1855.8774 | 1.0015  | <a href="#">NVLCGYVSEFEGQLQNK</a>  |                      |
| 8.7   | 1856.8805 | -0.0016 | <a href="#">GWAGNEGLNEELQVWR</a>   |                      |
| 7.5   | 1856.8832 | -0.0043 | <a href="#">LNKYQEPDVVNFDFK</a>    |                      |
| 6.7   | 1855.8799 | 0.9990  | <a href="#">GDAQISVTLVNHSEQEK</a>  |                      |

Mascot: <http://www.matrixscience.com/>

# MATRIX SCIENCE Mascot Search Results

## Peptide View

MS/MS Fragmentation of **RFCRDNYTDLVAIQNK**

Found in **P14151** in **con\_Xuniprot\_HUMAN3**, LYAM1\_HUMAN L-selectin OS=Homo sapiens GN=SELL PE=1 SV=2

Match to Query 12263: 2012.978892 from(672.000240,3+) intensity(29095.2637) rtinseconds(901) scans(2128) index(24425)

Title: 111019\_Est\_MI\_YS\_G\_06Spectrum1836\_scans\_\_2128

Data file C:\\mascot\\20140703\_Tmgf\_1D\\CSV\_UseAnalysis\\MasterCSV\\All\_Glyco\\mgf\\ptm\\UC18ERLIC\_PTM\_35D.mgf

Click mouse within plot area to zoom in by factor of two about that point

Or, to Da

Label all possible matches Label matches used for scoring

Show Y-axis

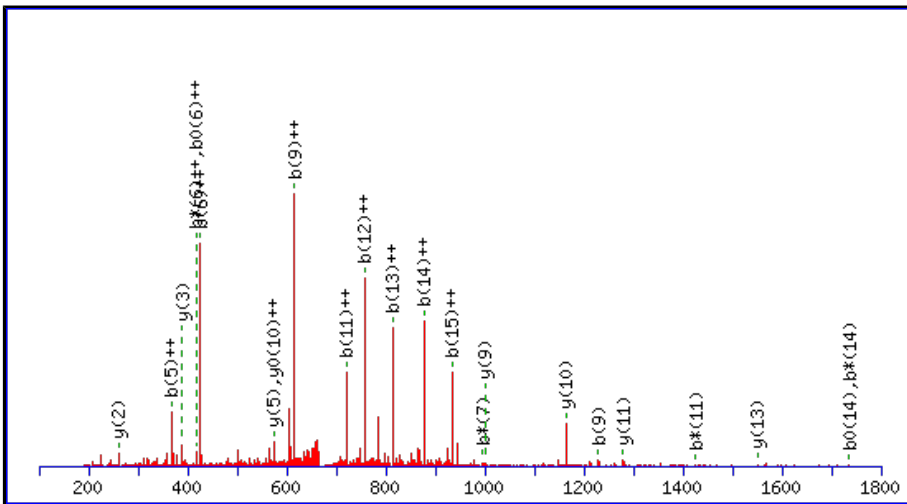

Monoisotopic mass of neutral peptide Mr(calc): 2012.9738

Fixed modifications: Carbamidomethyl (C) (apply to specified residues or termini only)

Variable modifications:

N6 : Deamidated (NQ)

Ions Score: 45 Expect: 0.0091

Matches : 23/158 fragment ions using 32 most intense peaks ([help](#))

| #  | b                | b <sup>++</sup> | b <sup>*</sup>   | b <sup>*++</sup> | b <sup>0</sup>   | b <sup>0++</sup> | Seq. | y                | y <sup>++</sup> | y <sup>*</sup> | y <sup>*++</sup> | y <sup>0</sup> | y <sup>0++</sup> | #  |
|----|------------------|-----------------|------------------|------------------|------------------|------------------|------|------------------|-----------------|----------------|------------------|----------------|------------------|----|
| 1  | 157.1084         | 79.0578         | 140.0818         | 70.5446          |                  |                  | R    |                  |                 |                |                  |                |                  | 16 |
| 2  | 304.1768         | 152.5920        | 287.1503         | 144.0788         |                  |                  | F    | 1857.8800        | 929.4436        | 1840.8534      | 920.9304         | 1839.8694      | 920.4383         | 15 |
| 3  | 464.2075         | 232.6074        | 447.1809         | 224.0941         |                  |                  | C    | 1710.8116        | 855.9094        | 1693.7850      | 847.3961         | 1692.8010      | 846.9041         | 14 |
| 4  | 620.3086         | 310.6579        | 603.2820         | 302.1446         |                  |                  | R    | <b>1550.7809</b> | 775.8941        | 1533.7544      | 767.3808         | 1532.7703      | 766.8888         | 13 |
| 5  | 735.3355         | <b>368.1714</b> | 718.3090         | 359.6581         | 717.3249         | 359.1661         | D    | 1394.6798        | 697.8435        | 1377.6533      | 689.3303         | 1376.6692      | 688.8383         | 12 |
| 6  | 850.3624         | <b>425.6849</b> | 833.3359         | <b>417.1716</b>  | 832.3519         | <b>416.6796</b>  | N    | <b>1279.6529</b> | 640.3301        | 1262.6263      | 631.8168         | 1261.6423      | 631.3248         | 11 |
| 7  | 1013.4258        | 507.2165        | <b>996.3992</b>  | 498.7033         | 995.4152         | 498.2112         | Y    | <b>1164.6259</b> | 582.8166        | 1147.5994      | 574.3033         | 1146.6154      | <b>573.8113</b>  | 10 |
| 8  | 1114.4735        | 557.7404        | 1097.4469        | 549.2271         | 1096.4629        | 548.7351         | T    | <b>1001.5626</b> | 501.2849        | 984.5360       | 492.7717         | 983.5520       | 492.2796         | 9  |
| 9  | <b>1229.5004</b> | <b>615.2538</b> | 1212.4738        | 606.7406         | 1211.4898        | 606.2486         | D    | 900.5149         | 450.7611        | 883.4884       | 442.2478         | 882.5043       | 441.7558         | 8  |
| 10 | 1342.5845        | 671.7959        | 1325.5579        | 663.2826         | 1324.5739        | 662.7906         | L    | 785.4880         | 393.2476        | 768.4614       | 384.7343         |                |                  | 7  |
| 11 | 1441.6529        | <b>721.3301</b> | <b>1424.6263</b> | 712.8168         | 1423.6423        | 712.3248         | V    | 672.4039         | 336.7056        | 655.3774       | 328.1923         |                |                  | 6  |
| 12 | 1512.6900        | <b>756.8486</b> | 1495.6634        | 748.3354         | 1494.6794        | 747.8434         | A    | <b>573.3355</b>  | 287.1714        | 556.3089       | 278.6581         |                |                  | 5  |
| 13 | 1625.7741        | <b>813.3907</b> | 1608.7475        | 804.8774         | 1607.7635        | 804.3854         | I    | 502.2984         | 251.6528        | 485.2718       | 243.1395         |                |                  | 4  |
| 14 | 1753.8326        | <b>877.4200</b> | <b>1736.8061</b> | 868.9067         | <b>1735.8221</b> | 868.4147         | Q    | <b>389.2143</b>  | 195.1108        | 372.1878       | 186.5975         |                |                  | 3  |
| 15 | 1867.8756        | <b>934.4414</b> | 1850.8490        | 925.9281         | 1849.8650        | 925.4361         | N    | <b>261.1557</b>  | 131.0815        | 244.1292       | 122.5682         |                |                  | 2  |
| 16 |                  |                 |                  |                  |                  |                  | K    | 147.1128         | 74.0600         | 130.0863       | 65.5468          |                |                  | 1  |

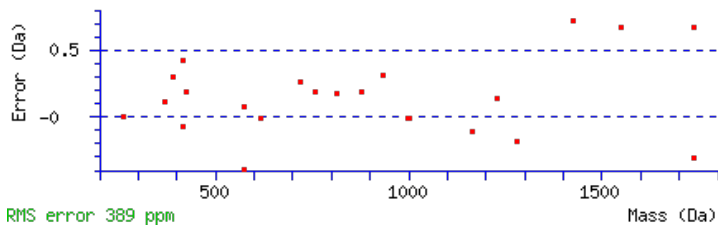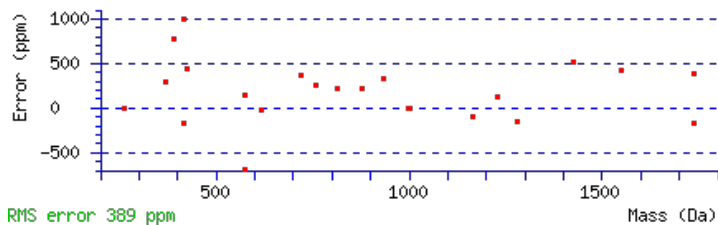

NCBI **BLAST** search of [RFCRDNYTDLVAIQNK](#)

(Parameters: blastp, nr protein database, expect=20000, no filter, PAM30)

Other BLAST [web gateways](#)

**All matches to this query**

| Score | Mr(calc)  | Delta   | Sequence                            | Site Analysis        |
|-------|-----------|---------|-------------------------------------|----------------------|
| 44.5  | 2012.9738 | 0.0051  | <a href="#">RFCRDNYTDLVAIQNK</a>    | Deamidated N6 88.84% |
| 33.3  | 2012.9738 | 0.0051  | <a href="#">RFCRDNYTDLVAIQNK</a>    | Deamidated Q14 6.69% |
| 31.5  | 2012.9738 | 0.0051  | <a href="#">RFCRDNYTDLVAIQNK</a>    | Deamidated N15 4.46% |
| 9.7   | 2010.9745 | 2.0044  | <a href="#">EETHQKLIANIVDNEQK</a>   |                      |
| 9.7   | 2010.9745 | 2.0044  | <a href="#">EETHQKLIANIVDNEQK</a>   |                      |
| 8.4   | 2012.9850 | -0.0061 | <a href="#">YPKEGTHIMRHSNLASR</a>   |                      |
| 7.0   | 2012.9877 | -0.0088 | <a href="#">ANNNSIMSFFKTLVSPNK</a>  |                      |
| 7.0   | 2012.9877 | -0.0088 | <a href="#">ANNNSIMSFFKTLVSPNK</a>  |                      |
| 7.0   | 2012.9877 | -0.0088 | <a href="#">ANNNSIMSFFKTLVSPNK</a>  |                      |
| 6.7   | 2012.9799 | -0.0010 | <a href="#">YPSQVSTAVTPMATATLMK</a> |                      |

Mascot: <http://www.matrixscience.com/>



# MASCOT SCIENCE Mascot Search Results

## Peptide View

MS/MS Fragmentation of **QNQCFYNSSYLNQQR**

Found in **P19652** in **con\_Xuniprot\_HUMAN3**, A1AG2\_HUMAN Alpha-1-acid glycoprotein 2 OS=Homo sapiens GN=ORM2 PE=1 SV=2

Match to Query 11625: 1920.850288 from(961.432420,2+) intensity(5708.4731) rtinseconds(1344) scans(2580) index(21587)

Title: 111019\_Est\_MI\_YP\_G\_14Spectrum2180\_scans\_\_2580

Data file C:\\mascot\\20140703\_Tmgf\_1D\\CSV\_UseAnalysis\\MasterCSV\\All\_Glyco\\mgf\\ptm\\UC18ERLIC\_PTM\_35D.mgf

Click mouse within plot area to zoom in by factor of two about that point

Or, to Da

Label all possible matches      Label matches used for scoring

Show Y-axis

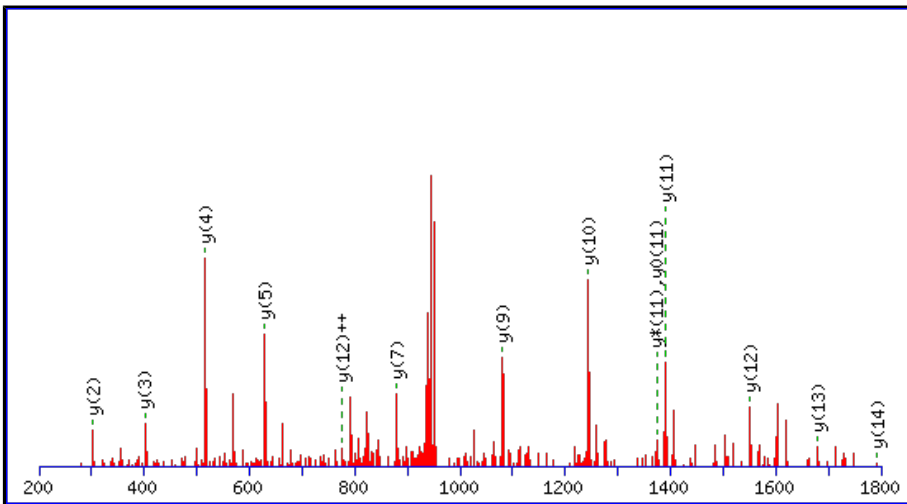

**Monoisotopic mass of neutral peptide Mr(calc):** 1920.8424

**Fixed modifications:** Carbamidomethyl (C) (apply to specified residues or termini only)

**Variable modifications:**

N7 : Deamidated (NQ)

**Ions Score:** 92    **Expect:** 7.7e-008

**Matches :** 14/142 fragment ions using 16 most intense peaks ([help](#))

| #  | b         | b <sup>++</sup> | b <sup>*</sup> | b <sup>*++</sup> | b <sup>0</sup> | b <sup>0++</sup> | Seq. | y         | y <sup>++</sup> | y <sup>*</sup> | y <sup>*++</sup> | y <sup>0</sup> | y <sup>0++</sup> | #  |
|----|-----------|-----------------|----------------|------------------|----------------|------------------|------|-----------|-----------------|----------------|------------------|----------------|------------------|----|
| 1  | 129.0659  | 65.0366         | 112.0393       | 56.5233          |                |                  | Q    |           |                 |                |                  |                |                  | 15 |
| 2  | 243.1088  | 122.0580        | 226.0822       | 113.5448         |                |                  | N    | 1793.7912 | 897.3992        | 1776.7646      | 888.8859         | 1775.7806      | 888.3939         | 14 |
| 3  | 371.1674  | 186.0873        | 354.1408       | 177.5740         |                |                  | Q    | 1679.7482 | 840.3778        | 1662.7217      | 831.8645         | 1661.7377      | 831.3725         | 13 |
| 4  | 531.1980  | 266.1026        | 514.1715       | 257.5894         |                |                  | C    | 1551.6897 | 776.3485        | 1534.6631      | 767.8352         | 1533.6791      | 767.3432         | 12 |
| 5  | 678.2664  | 339.6368        | 661.2399       | 331.1236         |                |                  | F    | 1391.6590 | 696.3331        | 1374.6325      | 687.8199         | 1373.6484      | 687.3279         | 11 |
| 6  | 841.3298  | 421.1685        | 824.3032       | 412.6552         |                |                  | Y    | 1244.5906 | 622.7989        | 1227.5640      | 614.2857         | 1226.5800      | 613.7937         | 10 |
| 7  | 956.3567  | 478.6820        | 939.3301       | 470.1687         |                |                  | N    | 1081.5273 | 541.2673        | 1064.5007      | 532.7540         | 1063.5167      | 532.2620         | 9  |
| 8  | 1043.3887 | 522.1980        | 1026.3622      | 513.6847         | 1025.3782      | 513.1927         | S    | 966.5003  | 483.7538        | 949.4738       | 475.2405         | 948.4898       | 474.7485         | 8  |
| 9  | 1130.4208 | 565.7140        | 1113.3942      | 557.2007         | 1112.4102      | 556.7087         | S    | 879.4683  | 440.2378        | 862.4417       | 431.7245         | 861.4577       | 431.2325         | 7  |
| 10 | 1293.4841 | 647.2457        | 1276.4575      | 638.7324         | 1275.4735      | 638.2404         | Y    | 792.4363  | 396.7218        | 775.4097       | 388.2085         |                |                  | 6  |
| 11 | 1406.5681 | 703.7877        | 1389.5416      | 695.2744         | 1388.5576      | 694.7824         | L    | 629.3729  | 315.1901        | 612.3464       | 306.6768         |                |                  | 5  |
| 12 | 1520.6111 | 760.8092        | 1503.5845      | 752.2959         | 1502.6005      | 751.8039         | N    | 516.2889  | 258.6481        | 499.2623       | 250.1348         |                |                  | 4  |
| 13 | 1619.6795 | 810.3434        | 1602.6529      | 801.8301         | 1601.6689      | 801.3381         | V    | 402.2459  | 201.6266        | 385.2194       | 193.1133         |                |                  | 3  |
| 14 | 1747.7381 | 874.3727        | 1730.7115      | 865.8594         | 1729.7275      | 865.3674         | Q    | 303.1775  | 152.0924        | 286.1510       | 143.5791         |                |                  | 2  |
| 15 |           |                 |                |                  |                |                  | R    | 175.1190  | 88.0631         | 158.0924       | 79.5498          |                |                  | 1  |

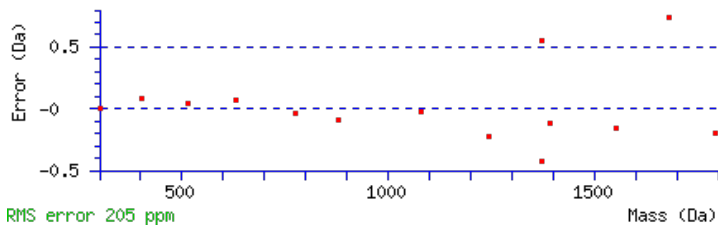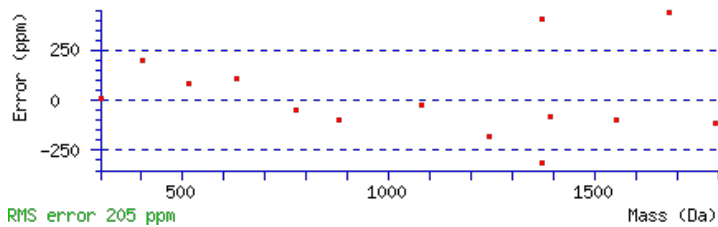

NCBI BLAST search of [QNQCFYNSSYLVQR](#)

(Parameters: blastp, nr protein database, expect=20000, no filter, PAM30)

Other BLAST [web gateways](#)

**All matches to this query**

| Score | Mr(calc)  | Delta   | Sequence                          | Site Analysis        |
|-------|-----------|---------|-----------------------------------|----------------------|
| 92.0  | 1920.8424 | 0.0078  | <a href="#">QNQCFYNSSYLVQR</a>    | Deamidated N7 99.99% |
| 49.6  | 1920.8424 | 0.0078  | <a href="#">QNQCFYNSSYLVQR</a>    | Deamidated N12 0.01% |
| 46.6  | 1920.8424 | 0.0078  | <a href="#">QNQCFYNSSYLVQR</a>    | Deamidated Q3 0.00%  |
| 34.5  | 1920.8424 | 0.0078  | <a href="#">QNQCFYNSSYLVQR</a>    | Deamidated N2 0.00%  |
| 34.5  | 1920.8424 | 0.0078  | <a href="#">QNQCFYNSSYLVQR</a>    | Deamidated Q1 0.00%  |
| 28.9  | 1920.8424 | 0.0078  | <a href="#">QNQCFYNSSYLVQR</a>    | Deamidated Q14 0.00% |
| 9.3   | 1920.8450 | 0.0053  | <a href="#">QRETEDNTGDFPIDER</a>  |                      |
| 3.6   | 1919.8506 | 0.9997  | <a href="#">CLQKMGSGLNSEFYDQR</a> |                      |
| 3.0   | 1918.8439 | 2.0064  | <a href="#">TSDQPSSTQPNRRPRSM</a> |                      |
| 2.1   | 1920.8564 | -0.0061 | <a href="#">PYEVNAGYDFTNMVRK</a>  |                      |

Mascot: <http://www.matrixscience.com/>

# MATRIX SCIENCE Mascot Search Results

## Peptide View

MS/MS Fragmentation of **QNQCFYNSSYLVNQR**

Found in **P19652** in **con\_Xuniprot\_HUMAN3**, A1AG2\_HUMAN Alpha-1-acid glycoprotein 2 OS=Homo sapiens GN=ORM2 PE=1 SV=2

Match to Query 11634: 1921.825528 from(961.920040,2+) intensity(649.6456) rtinseconds(1430) scans(2625) index(7837)

Title: 111019\_Est\_ISCardio\_NMI\_YP\_G\_14Spectrum2190\_scans\_\_2625

Data file C:\\mascot\\20140703\_Tmgf\_1D\\CSV\_UseAnalysis\\MasterCSV\\All\_Glyco\\mgf\\ptm\\UC18ERLIC\_PTM\_35D.mgf

Click mouse within plot area to zoom in by factor of two about that point

Or, to Da

Label all possible matches      Label matches used for scoring

Show Y-axis

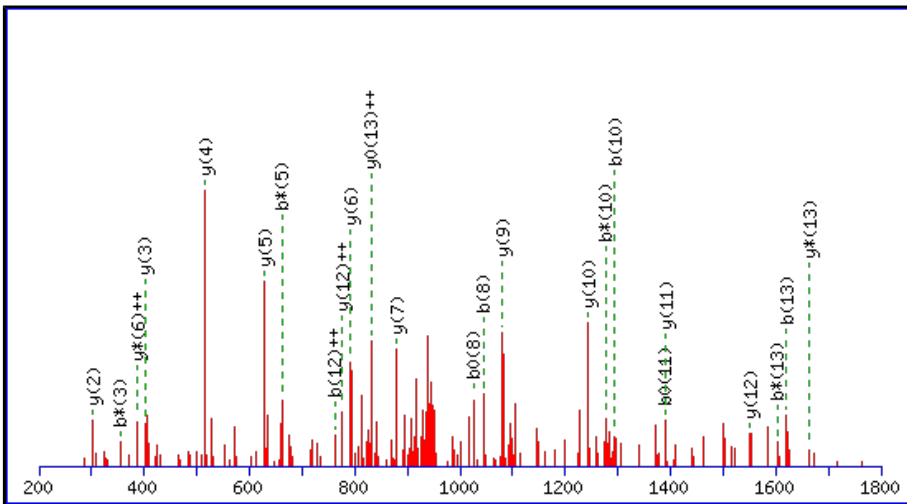

Monoisotopic mass of neutral peptide Mr(calc): 1921.8264

Fixed modifications: Carbamidomethyl (C) (apply to specified residues or termini only)

Variable modifications:

Q3 : Deamidated (NQ)

N7 : Deamidated (NQ)

Ions Score: 40    Expect: 0.008

Matches : 24/142 fragment ions using 58 most intense peaks ([help](#))

| #  | b         | b <sup>++</sup> | b*        | b <sup>+++</sup> | b <sup>0</sup> | b <sup>0++</sup> | Seq. | y         | y <sup>++</sup> | y*        | y <sup>+++</sup> | y <sup>0</sup> | y <sup>0++</sup> | #  |
|----|-----------|-----------------|-----------|------------------|----------------|------------------|------|-----------|-----------------|-----------|------------------|----------------|------------------|----|
| 1  | 129.0659  | 65.0366         | 112.0393  | 56.5233          |                |                  | Q    |           |                 |           |                  |                |                  | 15 |
| 2  | 243.1088  | 122.0580        | 226.0822  | 113.5448         |                |                  | N    | 1794.7752 | 897.8912        | 1777.7486 | 889.3780         | 1776.7646      | 888.8859         | 14 |
| 3  | 372.1514  | 186.5793        | 355.1248  | 178.0661         |                |                  | Q    | 1680.7322 | 840.8698        | 1663.7057 | 832.3565         | 1662.7217      | 831.8645         | 13 |
| 4  | 532.1820  | 266.5947        | 515.1555  | 258.0814         |                |                  | C    | 1551.6897 | 776.3485        | 1534.6631 | 767.8352         | 1533.6791      | 767.3432         | 12 |
| 5  | 679.2504  | 340.1289        | 662.2239  | 331.6156         |                |                  | F    | 1391.6590 | 696.3331        | 1374.6325 | 687.8199         | 1373.6484      | 687.3279         | 11 |
| 6  | 842.3138  | 421.6605        | 825.2872  | 413.1472         |                |                  | Y    | 1244.5906 | 622.7989        | 1227.5640 | 614.2857         | 1226.5800      | 613.7937         | 10 |
| 7  | 957.3407  | 479.1740        | 940.3142  | 470.6607         |                |                  | N    | 1081.5273 | 541.2673        | 1064.5007 | 532.7540         | 1063.5167      | 532.2620         | 9  |
| 8  | 1044.3727 | 522.6900        | 1027.3462 | 514.1767         | 1026.3622      | 513.6847         | S    | 966.5003  | 483.7538        | 949.4738  | 475.2405         | 948.4898       | 474.7485         | 8  |
| 9  | 1131.4048 | 566.2060        | 1114.3782 | 557.6927         | 1113.3942      | 557.2007         | S    | 879.4683  | 440.2378        | 862.4417  | 431.7245         | 861.4577       | 431.2325         | 7  |
| 10 | 1294.4681 | 647.7377        | 1277.4415 | 639.2244         | 1276.4575      | 638.7324         | Y    | 792.4363  | 396.7218        | 775.4097  | 388.2085         |                |                  | 6  |
| 11 | 1407.5522 | 704.2797        | 1390.5256 | 695.7664         | 1389.5416      | 695.2744         | L    | 629.3729  | 315.1901        | 612.3464  | 306.6768         |                |                  | 5  |
| 12 | 1521.5951 | 761.3012        | 1504.5685 | 752.7879         | 1503.5845      | 752.2959         | N    | 516.2889  | 258.6481        | 499.2623  | 250.1348         |                |                  | 4  |
| 13 | 1620.6635 | 810.8354        | 1603.6370 | 802.3221         | 1602.6529      | 801.8301         | V    | 402.2459  | 201.6266        | 385.2194  | 193.1133         |                |                  | 3  |
| 14 | 1748.7221 | 874.8647        | 1731.6955 | 866.3514         | 1730.7115      | 865.8594         | Q    | 303.1775  | 152.0924        | 286.1510  | 143.5791         |                |                  | 2  |
| 15 |           |                 |           |                  |                |                  | R    | 175.1190  | 88.0631         | 158.0924  | 79.5498          |                |                  | 1  |

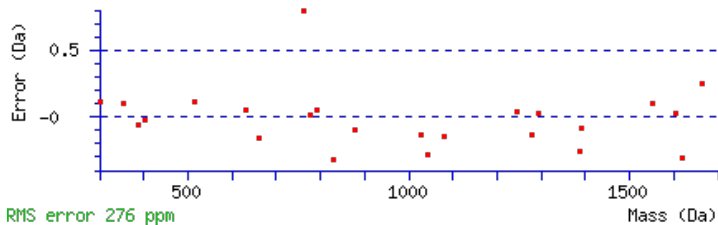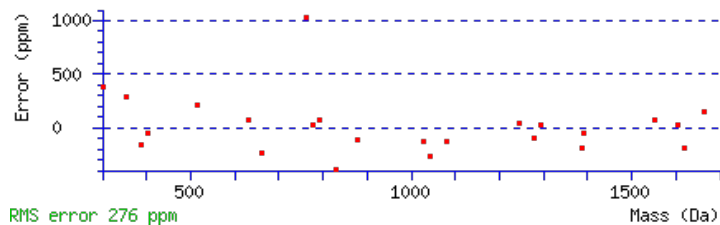

NCBI BLAST search of [QNQCFYNSSYLVQR](#)

(Parameters: blastp, nr protein database, expect=20000, no filter, PAM30)

Other BLAST [web gateways](#)

**All matches to this query**

| Score | Mr(calc)  | Delta   | Sequence                       | Site Analysis            |
|-------|-----------|---------|--------------------------------|--------------------------|
| 39.8  | 1921.8264 | -0.0009 | <a href="#">QNQCFYNSSYLVQR</a> | Deamidated Q3, N7 39.99% |
| 38.5  | 1921.8264 | -0.0009 | <a href="#">QNQCFYNSSYLVQR</a> | Deamidated N2, N7 29.64% |
| 38.5  | 1921.8264 | -0.0009 | <a href="#">QNQCFYNSSYLVQR</a> | Deamidated Q1, N7 29.64% |
| 15.4  | 1921.8264 | -0.0009 | <a href="#">QNQCFYNSSYLVQR</a> | Deamidated Q3, N12 0.15% |
| 14.9  | 1921.8264 | -0.0009 | <a href="#">QNQCFYNSSYLVQR</a> | Deamidated N2, N12 0.13% |
| 14.9  | 1921.8264 | -0.0009 | <a href="#">QNQCFYNSSYLVQR</a> | Deamidated Q1, N12 0.13% |
| 10.3  | 1921.8264 | -0.0009 | <a href="#">QNQCFYNSSYLVQR</a> | Deamidated Q3, Q14 0.04% |
| 9.9   | 1921.8264 | -0.0009 | <a href="#">QNQCFYNSSYLVQR</a> | Deamidated N7, N12 0.04% |
| 9.8   | 1921.8264 | -0.0009 | <a href="#">QNQCFYNSSYLVQR</a> | Deamidated N2, Q14 0.04% |
| 9.8   | 1921.8264 | -0.0009 | <a href="#">QNQCFYNSSYLVQR</a> | Deamidated Q1, Q14 0.04% |

Mascot: <http://www.matrixscience.com/>

# MASCOT SCIENCE Mascot Search Results

## Peptide View

MS/MS Fragmentation of **QNQCFYNSSYLVNQRENGTVSR**

Found in **P19652** in **con\_Xuniprot\_HUMAN3**, A1AG2\_HUMAN Alpha-1-acid glycoprotein 2 OS=Homo sapiens GN=ORM2 PE=1 SV=2

Match to Query 22384: 2665.189002 from(889.403610,3+) intensity(16984.2383) rtinseconds(1265) scans(3046) index(26553)

Title: 111019\_Est\_MI\_YS\_G\_09Spectrum2623\_scans\_\_3046

Data file C:\mascot\20140703\_Tmgf\_1D\CSV\_UseAnalysis\MasterCSV\All\_Glyco\mgf\ptm\UC18ERLIC\_PTM\_35D.mgf

Click mouse within plot area to zoom in by factor of two about that point

Or, to Da

Label all possible matches Label matches used for scoring

Show Y-axis

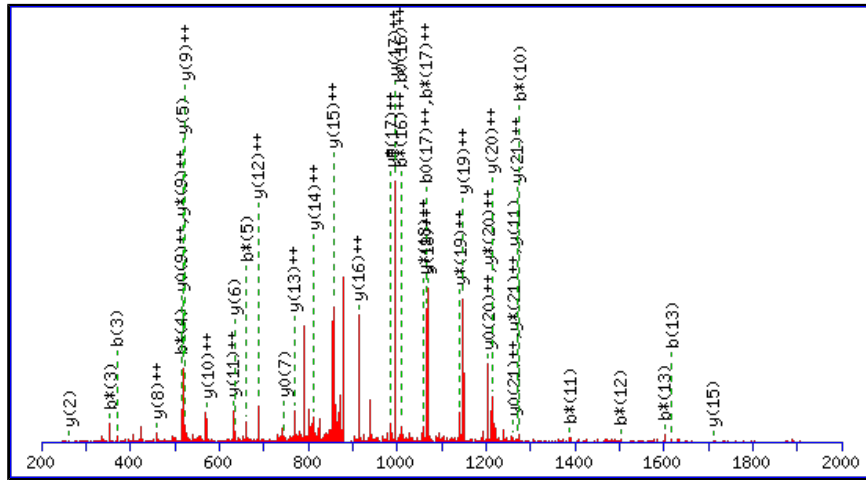

Monoisotopic mass of neutral peptide Mr(calc): 2665.1827

Fixed modifications: Carbamidomethyl (C) (apply to specified residues or termini only)

Variable modifications:

Q14 : Deamidated (NQ)

N17 : Deamidated (NQ)

Ions Score: 36 Expect: 0.033

Matches : 43/236 fragment ions using 116 most intense peaks ([help](#))

| #  | b         | b <sup>++</sup> | b <sup>*</sup> | b <sup>*++</sup> | b <sup>0</sup> | b <sup>0++</sup> | Seq. | y         | y <sup>++</sup> | y <sup>*</sup> | y <sup>*++</sup> | y <sup>0</sup> | y <sup>0++</sup> | #  |
|----|-----------|-----------------|----------------|------------------|----------------|------------------|------|-----------|-----------------|----------------|------------------|----------------|------------------|----|
| 1  | 129.0659  | 65.0366         | 112.0393       | 56.5233          |                |                  | Q    |           |                 |                |                  |                |                  | 22 |
| 2  | 243.1088  | 122.0580        | 226.0822       | 113.5448         |                |                  | N    | 2538.1314 | 1269.5693       | 2521.1048      | 1261.0561        | 2520.1208      | 1260.5641        | 21 |
| 3  | 371.1674  | 186.0873        | 354.1408       | 177.5740         |                |                  | Q    | 2424.0885 | 1212.5479       | 2407.0619      | 1204.0346        | 2406.0779      | 1203.5426        | 20 |
| 4  | 531.1980  | 266.1026        | 514.1715       | 257.5894         |                |                  | C    | 2296.0299 | 1148.5186       | 2279.0033      | 1140.0053        | 2278.0193      | 1139.5133        | 19 |
| 5  | 678.2664  | 339.6368        | 661.2399       | 331.1236         |                |                  | F    | 2135.9992 | 1068.5033       | 2118.9727      | 1059.9900        | 2117.9887      | 1059.4980        | 18 |
| 6  | 841.3298  | 421.1685        | 824.3032       | 412.6552         |                |                  | Y    | 1988.9308 | 994.9690        | 1971.9043      | 986.4558         | 1970.9203      | 985.9638         | 17 |
| 7  | 955.3727  | 478.1900        | 938.3461       | 469.6767         |                |                  | N    | 1825.8675 | 913.4374        | 1808.8409      | 904.9241         | 1807.8569      | 904.4321         | 16 |
| 8  | 1042.4047 | 521.7060        | 1025.3782      | 513.1927         | 1024.3941      | 512.7007         | S    | 1711.8246 | 856.4159        | 1694.7980      | 847.9026         | 1693.8140      | 847.4106         | 15 |
| 9  | 1129.4367 | 565.2220        | 1112.4102      | 556.7087         | 1111.4262      | 556.2167         | S    | 1624.7925 | 812.8999        | 1607.7660      | 804.3866         | 1606.7820      | 803.8946         | 14 |
| 10 | 1292.5001 | 646.7537        | 1275.4735      | 638.2404         | 1274.4895      | 637.7484         | Y    | 1537.7605 | 769.3839        | 1520.7340      | 760.8706         | 1519.7499      | 760.3786         | 13 |
| 11 | 1405.5841 | 703.2957        | 1388.5576      | 694.7824         | 1387.5736      | 694.2904         | L    | 1374.6972 | 687.8522        | 1357.6706      | 679.3390         | 1356.6866      | 678.8469         | 12 |
| 12 | 1519.6271 | 760.3172        | 1502.6005      | 751.8039         | 1501.6165      | 751.3119         | N    | 1261.6131 | 631.3102        | 1244.5866      | 622.7969         | 1243.6026      | 622.3049         | 11 |
| 13 | 1618.6955 | 809.8514        | 1601.6689      | 801.3381         | 1600.6849      | 800.8461         | V    | 1147.5702 | 574.2887        | 1130.5436      | 565.7755         | 1129.5596      | 565.2835         | 10 |
| 14 | 1747.7381 | 874.3727        | 1730.7115      | 865.8594         | 1729.7275      | 865.3674         | Q    | 1048.5018 | 524.7545        | 1031.4752      | 516.2413         | 1030.4912      | 515.7492         | 9  |
| 15 | 1903.8392 | 952.4232        | 1886.8126      | 943.9100         | 1885.8286      | 943.4179         | R    | 919.4592  | 460.2332        | 902.4326       | 451.7200         | 901.4486       | 451.2279         | 8  |
| 16 | 2032.8818 | 1016.9445       | 2015.8552      | 1008.4312        | 2014.8712      | 1007.9392        | E    | 763.3581  | 382.1827        | 746.3315       | 373.6694         | 745.3475       | 373.1774         | 7  |
| 17 | 2147.9087 | 1074.4580       | 2130.8822      | 1065.9447        | 2129.8981      | 1065.4527        | N    | 634.3155  | 317.6614        | 617.2889       | 309.1481         | 616.3049       | 308.6561         | 6  |
| 18 | 2204.9302 | 1102.9687       | 2187.9036      | 1094.4554        | 2186.9196      | 1093.9634        | G    | 519.2885  | 260.1479        | 502.2620       | 251.6346         | 501.2780       | 251.1426         | 5  |
| 19 | 2305.9779 | 1153.4926       | 2288.9513      | 1144.9793        | 2287.9673      | 1144.4873        | T    | 462.2671  | 231.6372        | 445.2405       | 223.1239         | 444.2565       | 222.6319         | 4  |
| 20 | 2405.0463 | 1203.0268       | 2388.0197      | 1194.5135        | 2387.0357      | 1194.0215        | V    | 361.2194  | 181.1133        | 344.1928       | 172.6001         | 343.2088       | 172.1081         | 3  |
| 21 | 2492.0783 | 1246.5428       | 2475.0517      | 1238.0295        | 2474.0677      | 1237.5375        | S    | 262.1510  | 131.5791        | 245.1244       | 123.0659         | 244.1404       | 122.5738         | 2  |
| 22 |           |                 |                |                  |                |                  | R    | 175.1190  | 88.0631         | 158.0924       | 79.5498          |                |                  | 1  |

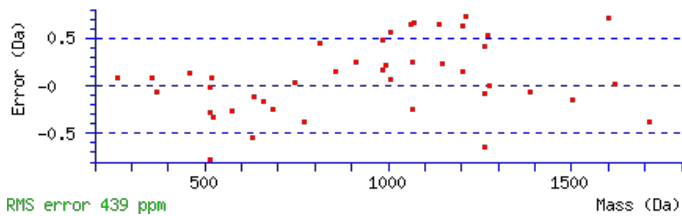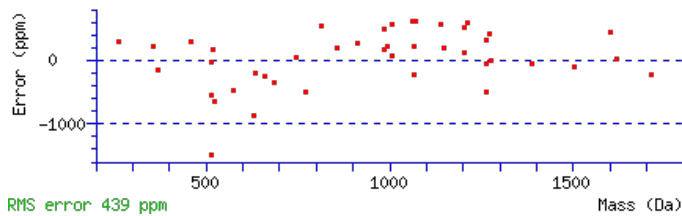

NCBI BLAST search of [QNQCFYNSSYLNQRENGTVSR](#)

(Parameters: blastp, nr protein database, expect=20000, no filter, PAM30)

Other BLAST [web gateways](#)

All matches to this query

| Score | Mr(calc)  | Delta   | Sequence                                   | Site Analysis              |
|-------|-----------|---------|--------------------------------------------|----------------------------|
| 36.5  | 2665.1827 | 0.0063  | <a href="#">QNQCFYNSSYLNQRENGTVSR</a>      | Deamidated Q14, N17 59.64% |
| 32.6  | 2665.1827 | 0.0063  | <a href="#">QNQCFYNSSYLNQRENGTVSR</a>      | Deamidated N7, N12 24.13%  |
| 29.6  | 2665.1827 | 0.0063  | <a href="#">QNQCFYNSSYLNQRENGTVSR</a>      | Deamidated N12, Q14 12.35% |
| 22.9  | 2664.1987 | 0.9903  | <a href="#">QNQCFYNSSYLNQRENGTVSR</a>      |                            |
| 22.9  | 2664.1987 | 0.9903  | <a href="#">QNQCFYNSSYLNQRENGTVSR</a>      |                            |
| 22.8  | 2665.1827 | 0.0063  | <a href="#">QNQCFYNSSYLNQRENGTVSR</a>      | Deamidated Q1, N17 2.57%   |
| 21.9  | 2664.1987 | 0.9903  | <a href="#">QNQCFYNSSYLNQRENGTVSR</a>      |                            |
| 18.2  | 2665.1827 | 0.0063  | <a href="#">QNQCFYNSSYLNQRENGTVSR</a>      | Deamidated Q3, N7 0.89%    |
| 16.9  | 2664.1987 | 0.9903  | <a href="#">QNQCFYNSSYLNQRENGTVSR</a>      |                            |
| 4.0   | 2665.1959 | -0.0069 | <a href="#">EGAGVDMKAQGMAQSQGEALPNTRGK</a> |                            |

Mascot: <http://www.matrixscience.com/>

# MASCOT SCIENCE Mascot Search Results

## Peptide View

MS/MS Fragmentation of **AFGSNPNLTK**

Found in **P22792** in **con\_Xuniprot\_HUMAN3**, CPN2\_HUMAN Carboxypeptidase N subunit 2 OS=Homo sapiens GN=CPN2 PE=1 SV=3

Match to Query 191: 1048.519708 from(525.267130,2+) intensity(72408.2422) rtinseconds(455) scans(869) index(6864)

Title: 111019\_Est\_ISCardio\_NMI\_YP\_G\_10Spectrum710\_scans\_\_869

Data file C:\\mascot\\20140703\_Tmgf\_1D\\CSV\_UseAnalysis\\MasterCSV\\All\_Glyco\\mgf\\ptm\\UC18ERLIC\_PTM\_35D.mgf

Click mouse within plot area to zoom in by factor of two about that point

Or,  to  Da

Label all possible matches  Label matches used for scoring

Show Y-axis

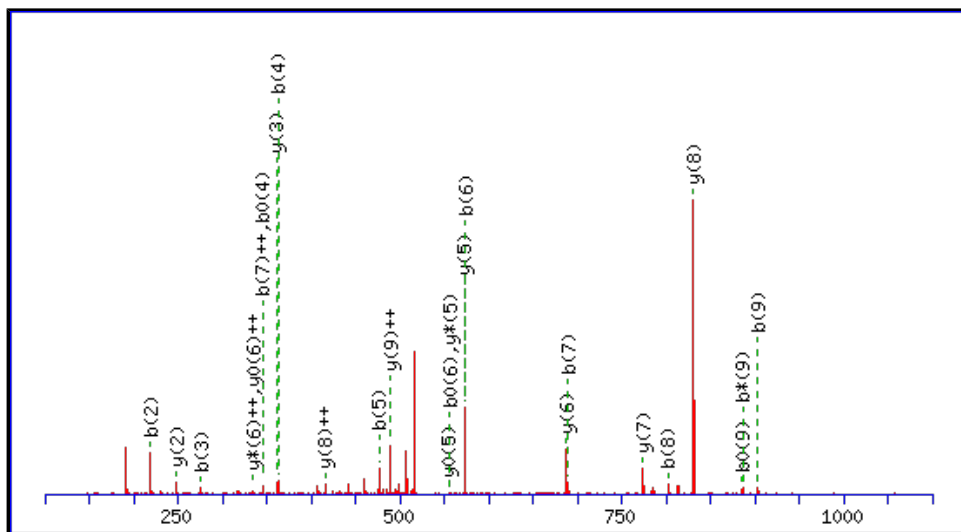

Monoisotopic mass of neutral peptide **Mr(calc):** 1048.5189

**Fixed modifications:** Carbamidomethyl (C) (apply to specified residues or termini only)

**Variable modifications:**

N7 : Deamidated (NQ)

**Ions Score:** 63 **Expect:** 0.0001

**Matches :** 25/92 fragment ions using 33 most intense peaks ([help](#))

| #  | b        | b <sup>++</sup> | b <sup>*</sup> | b <sup>*++</sup> | b <sup>0</sup> | b <sup>0++</sup> | Seq. | y        | y <sup>++</sup> | y <sup>*</sup> | y <sup>*++</sup> | y <sup>0</sup> | y <sup>0++</sup> | #  |
|----|----------|-----------------|----------------|------------------|----------------|------------------|------|----------|-----------------|----------------|------------------|----------------|------------------|----|
| 1  | 72.0444  | 36.5258         |                |                  |                |                  | A    |          |                 |                |                  |                |                  | 10 |
| 2  | 219.1128 | 110.0600        |                |                  |                |                  | F    | 978.4891 | 489.7482        | 961.4625       | 481.2349         | 960.4785       | 480.7429         | 9  |
| 3  | 276.1343 | 138.5708        |                |                  |                |                  | G    | 831.4207 | 416.2140        | 814.3941       | 407.7007         | 813.4101       | 407.2087         | 8  |
| 4  | 363.1663 | 182.0868        |                |                  | 345.1557       | 173.0815         | S    | 774.3992 | 387.7032        | 757.3727       | 379.1900         | 756.3886       | 378.6980         | 7  |
| 5  | 477.2092 | 239.1082        | 460.1827       | 230.5950         | 459.1987       | 230.1030         | N    | 687.3672 | 344.1872        | 670.3406       | 335.6740         | 669.3566       | 335.1819         | 6  |
| 6  | 574.2620 | 287.6346        | 557.2354       | 279.1214         | 556.2514       | 278.6293         | P    | 573.3243 | 287.1658        | 556.2977       | 278.6525         | 555.3137       | 278.1605         | 5  |
| 7  | 689.2889 | 345.1481        | 672.2624       | 336.6348         | 671.2784       | 336.1428         | N    | 476.2715 | 238.6394        | 459.2449       | 230.1261         | 458.2609       | 229.6341         | 4  |
| 8  | 802.3730 | 401.6901        | 785.3464       | 393.1769         | 784.3624       | 392.6849         | L    | 361.2445 | 181.1259        | 344.2180       | 172.6126         | 343.2340       | 172.1206         | 3  |
| 9  | 903.4207 | 452.2140        | 886.3941       | 443.7007         | 885.4101       | 443.2087         | T    | 248.1605 | 124.5839        | 231.1339       | 116.0706         | 230.1499       | 115.5786         | 2  |
| 10 |          |                 |                |                  |                |                  | K    | 147.1128 | 74.0600         | 130.0863       | 65.5468          |                |                  | 1  |



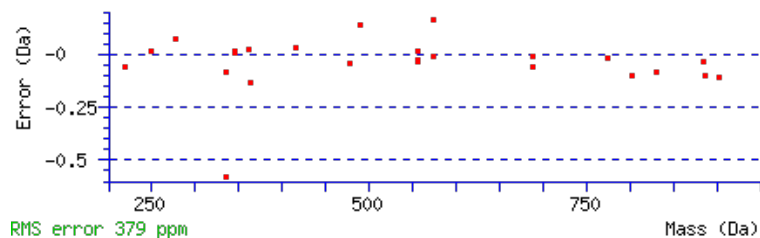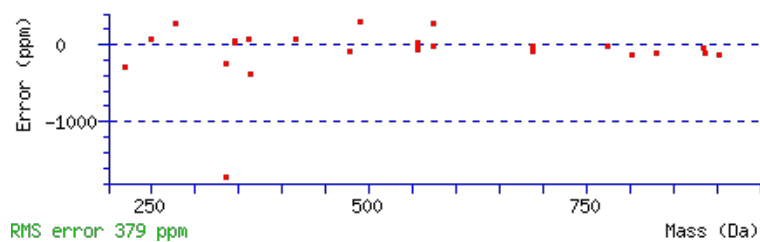

NCBI **BLAST** search of [AFGSNPNLTK](#)  
 (Parameters: blastp, nr protein database, expect=20000, no filter, PAM30)  
 Other BLAST [web gateways](#)

**All matches to this query**

| Score | Mr(calc)  | Delta   | Sequence                    | Site Analysis        |
|-------|-----------|---------|-----------------------------|----------------------|
| 63.3  | 1048.5189 | 0.0008  | <a href="#">AFGSNPNLTK</a>  | Deamidated N7 99.81% |
| 36.1  | 1048.5189 | 0.0008  | <a href="#">AFGSNPNLTK</a>  | Deamidated N5 0.19%  |
| 24.5  | 1048.5223 | -0.0026 | <a href="#">SCLVISNEK</a>   |                      |
| 11.2  | 1048.5148 | 0.0049  | <a href="#">EASRNKSEK</a>   |                      |
| 11.2  | 1048.5148 | 0.0049  | <a href="#">QASRNKSEK</a>   |                      |
| 9.8   | 1048.5149 | 0.0048  | <a href="#">TSRNNDTLK</a>   |                      |
| 8.8   | 1048.5149 | 0.0048  | <a href="#">LTGTSNNSAGK</a> |                      |
| 8.6   | 1048.5149 | 0.0048  | <a href="#">TSRNNDTLK</a>   |                      |
| 8.3   | 1048.5223 | -0.0026 | <a href="#">MAASQVLGEK</a>  |                      |
| 7.6   | 1048.5149 | 0.0048  | <a href="#">RETEGKDSK</a>   |                      |

Mascot: <http://www.matrixscience.com/>

# MASCOT SCIENCE Mascot Search Results

## Peptide View

MS/MS Fragmentation of **LYLGSNNLTALHPALFQNL SK**

Found in **P22792** in **con\_Xuniprot\_HUMAN3**, CPN2\_HUMAN Carboxypeptidase N subunit 2 OS=Homo sapiens GN=CPN2 PE=1 SV=3

Match to Query 15444: 2315.236668 from(1158.625610,2+) intensity(0.0000) rtinseconds(2124) scans(5548) index(6592)

Title: 111019\_Est\_ISCardio\_NMI\_YP\_G\_9Spectrum4880\_scans\_\_5548

Data file C:\mascot\20140703\_Tmgf\_1D\CSV\_UseAnalysis\MasterCSV\All\_Glyco\mgf\ptm\UC18ERLIC\_PTM\_35D.mgf

Click mouse within plot area to zoom in by factor of two about that point

Or, to Da

Label all possible matches Label matches used for scoring

Show Y-axis

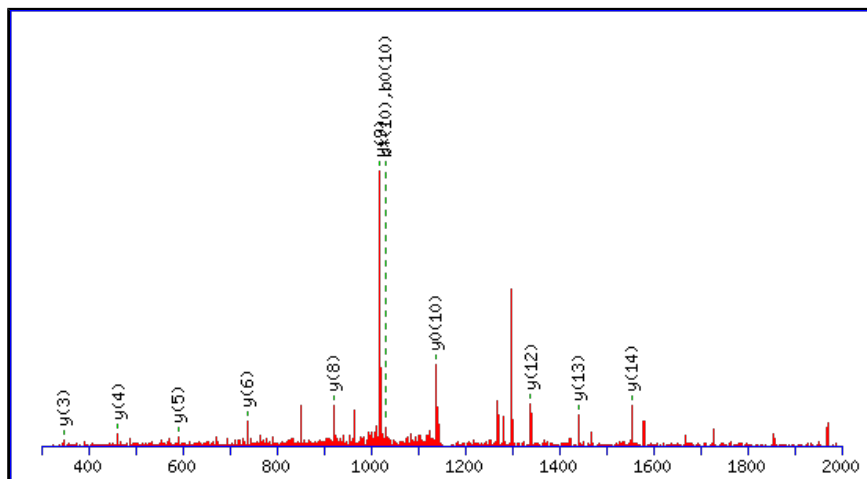

Monoisotopic mass of neutral peptide Mr(calc): 2314.2321

Fixed modifications: Carbamidomethyl (C) (apply to specified residues or termini only)

Variable modifications:

N18 : Deamidated (NQ)

Ions Score: 54 Expect: 0.00054

Matches : 12/220 fragment ions using 17 most intense peaks ([help](#))

| #  | b         | b <sup>++</sup> | b*               | b <sup>*++</sup> | b <sup>0</sup>   | b <sup>0++</sup> | Seq. | y                | y <sup>++</sup> | y*        | y <sup>*++</sup> | y <sup>0</sup>   | y <sup>0++</sup> | #  |
|----|-----------|-----------------|------------------|------------------|------------------|------------------|------|------------------|-----------------|-----------|------------------|------------------|------------------|----|
| 1  | 114.0913  | 57.5493         |                  |                  |                  |                  | L    |                  |                 |           |                  |                  |                  | 21 |
| 2  | 277.1547  | 139.0810        |                  |                  |                  |                  | Y    | 2202.1553        | 1101.5813       | 2185.1288 | 1093.0680        | 2184.1448        | 1092.5760        | 20 |
| 3  | 390.2387  | 195.6230        |                  |                  |                  |                  | L    | 2039.0920        | 1020.0496       | 2022.0655 | 1011.5364        | 2021.0815        | 1011.0444        | 19 |
| 4  | 447.2602  | 224.1337        |                  |                  |                  |                  | G    | 1926.0080        | 963.5076        | 1908.9814 | 954.9943         | 1907.9974        | 954.5023         | 18 |
| 5  | 534.2922  | 267.6498        |                  |                  | 516.2817         | 258.6445         | S    | 1868.9865        | 934.9969        | 1851.9599 | 926.4836         | 1850.9759        | 925.9916         | 17 |
| 6  | 648.3352  | 324.6712        | 631.3086         | 316.1579         | 630.3246         | 315.6659         | N    | 1781.9545        | 891.4809        | 1764.9279 | 882.9676         | 1763.9439        | 882.4756         | 16 |
| 7  | 762.3781  | 381.6927        | 745.3515         | 373.1794         | 744.3675         | 372.6874         | N    | 1667.9115        | 834.4594        | 1650.8850 | 825.9461         | 1649.9010        | 825.4541         | 15 |
| 8  | 875.4621  | 438.2347        | 858.4356         | 429.7214         | 857.4516         | 429.2294         | L    | <b>1553.8686</b> | 777.4379        | 1536.8421 | 768.9247         | 1535.8580        | 768.4327         | 14 |
| 9  | 976.5098  | 488.7585        | 959.4833         | 480.2453         | 958.4993         | 479.7533         | T    | <b>1440.7845</b> | 720.8959        | 1423.7580 | 712.3826         | 1422.7740        | 711.8906         | 13 |
| 10 | 1047.5469 | 524.2771        | <b>1030.5204</b> | 515.7638         | <b>1029.5364</b> | 515.2718         | A    | <b>1339.7369</b> | 670.3721        | 1322.7103 | 661.8588         | 1321.7263        | 661.3668         | 12 |
| 11 | 1160.6310 | 580.8191        | 1143.6045        | 572.3059         | 1142.6204        | 571.8139         | L    | 1268.6997        | 634.8535        | 1251.6732 | 626.3402         | 1250.6892        | 625.8482         | 11 |
| 12 | 1297.6899 | 649.3486        | 1280.6634        | 640.8353         | 1279.6793        | 640.3433         | H    | 1155.6157        | 578.3115        | 1138.5891 | 569.7982         | <b>1137.6051</b> | 569.3062         | 10 |
| 13 | 1394.7427 | 697.8750        | 1377.7161        | 689.3617         | 1376.7321        | 688.8697         | P    | <b>1018.5568</b> | 509.7820        | 1001.5302 | 501.2688         | 1000.5462        | 500.7767         | 9  |
| 14 | 1465.7798 | 733.3935        | 1448.7532        | 724.8803         | 1447.7692        | 724.3883         | A    | <b>921.5040</b>  | 461.2556        | 904.4775  | 452.7424         | 903.4934         | 452.2504         | 8  |
| 15 | 1578.8639 | 789.9356        | 1561.8373        | 781.4223         | 1560.8533        | 780.9303         | L    | 850.4669         | 425.7371        | 833.4403  | 417.2238         | 832.4563         | 416.7318         | 7  |
| 16 | 1725.9323 | 863.4698        | 1708.9057        | 854.9565         | 1707.9217        | 854.4645         | F    | <b>737.3828</b>  | 369.1951        | 720.3563  | 360.6818         | 719.3723         | 360.1898         | 6  |
| 17 | 1853.9908 | 927.4991        | 1836.9643        | 918.9858         | 1835.9803        | 918.4938         | Q    | <b>590.3144</b>  | 295.6608        | 573.2879  | 287.1476         | 572.3039         | 286.6556         | 5  |
| 18 | 1969.0178 | 985.0125        | 1951.9912        | 976.4993         | 1951.0072        | 976.0073         | N    | <b>462.2558</b>  | 231.6316        | 445.2293  | 223.1183         | 444.2453         | 222.6263         | 4  |
| 19 | 2082.1019 | 1041.5546       | 2065.0753        | 1033.0413        | 2064.0913        | 1032.5493        | L    | <b>347.2289</b>  | 174.1181        | 330.2023  | 165.6048         | 329.2183         | 165.1128         | 3  |
| 20 | 2169.1339 | 1085.0706       | 2152.1073        | 1076.5573        | 2151.1233        | 1076.0653        | S    | 234.1448         | 117.5761        | 217.1183  | 109.0628         | 216.1343         | 108.5708         | 2  |
| 21 |           |                 |                  |                  |                  |                  | K    | 147.1128         | 74.0600         | 130.0863  | 65.5468          |                  |                  | 1  |

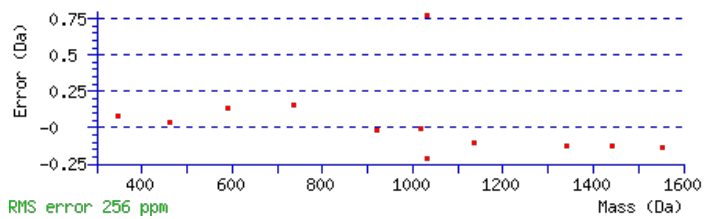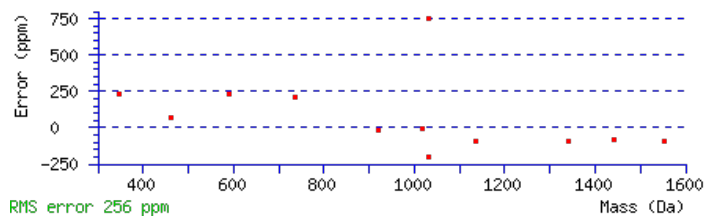

NCBI **BLAST** search of [LYLGSNNLTALHPALFQNL SK](#)  
 (Parameters: blastp, nr protein database, expect=20000, no filter, PAM30)  
 Other BLAST [web gateways](#)

**All matches to this query**

| Score | Mr(calc)  | Delta  | Sequence                               | Site Analysis         |
|-------|-----------|--------|----------------------------------------|-----------------------|
| 54.4  | 2314.2321 | 1.0046 | <a href="#">LYLGSNNLTALHPALFQNL SK</a> | Deamidated N18 94.60% |
| 42.0  | 2314.2321 | 1.0046 | <a href="#">LYLGSNNLTALHPALFQNL SK</a> | Deamidated Q17 5.39%  |
| 8.4   | 2314.2321 | 1.0046 | <a href="#">LYLGSNNLTALHPALFQNL SK</a> | Deamidated N7 0.00%   |
| 8.4   | 2314.2321 | 1.0046 | <a href="#">LYLGSNNLTALHPALFQNL SK</a> | Deamidated N6 0.00%   |

Mascot: <http://www.matrixscience.com/>

# MASCOT SCIENCE Mascot Search Results

## Peptide View

MS/MS Fragmentation of **LYLGSNNLTALHPALFQNLK**

Found in **P22792** in **con\_Xuniprot\_HUMAN3**, CPN2\_HUMAN Carboxypeptidase N subunit 2 OS=Homo sapiens GN=CPN2 PE=1 SV=3

Match to Query 15442: 2315.220732 from(772.747520,3+) intensity(257583.1094) rtinseconds(2134) scans(5575) index(6594)

Title: 111019\_Est\_ISCardio\_NMI\_YP\_G\_9Spectrum4904\_scans\_\_5575

Data file C:\mascot\20140703\_Tmgf\_1D\CSV\_UseAnalysis\MasterCSV\All\_Glyco\mgf\ptm\UC18ERLIC\_PTM\_35D.mgf

Click mouse within plot area to zoom in by factor of two about that point

Or, to Da

Label all possible matches Label matches used for scoring

Show Y-axis

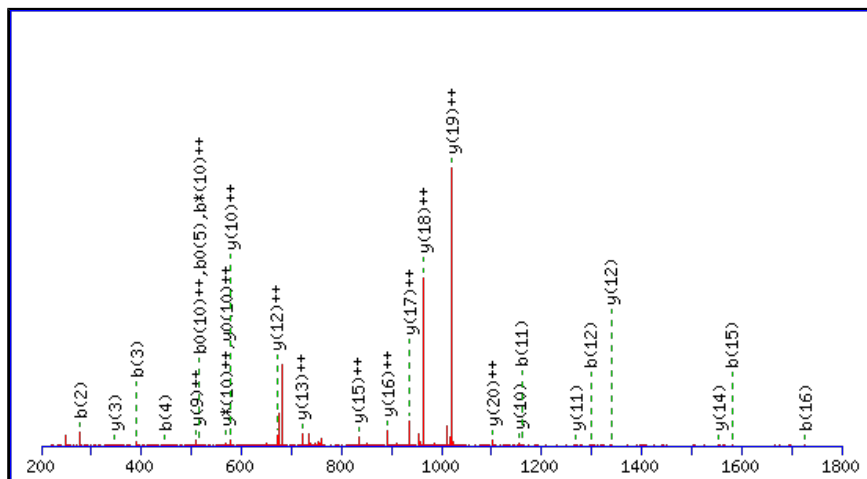

Monoisotopic mass of neutral peptide Mr(calc): 2315.2161

Fixed modifications: Carbamidomethyl (C) (apply to specified residues or termini only)

Variable modifications:

N7 : Deamidated (NQ)

N18 : Deamidated (NQ)

Ions Score: 53 Expect: 0.001

Matches : 27/220 fragment ions using 46 most intense peaks ([help](#))

| #  | b                | b <sup>++</sup> | b <sup>*</sup> | b <sup>*++</sup> | b <sup>0</sup>  | b <sup>0++</sup> | Seq. | y                | y <sup>++</sup>  | y <sup>*</sup> | y <sup>*++</sup> | y <sup>0</sup> | y <sup>0++</sup> | #  |
|----|------------------|-----------------|----------------|------------------|-----------------|------------------|------|------------------|------------------|----------------|------------------|----------------|------------------|----|
| 1  | 114.0913         | 57.5493         |                |                  |                 |                  | L    |                  |                  |                |                  |                |                  | 21 |
| 2  | <b>277.1547</b>  | 139.0810        |                |                  |                 |                  | Y    | 2203.1394        | <b>1102.0733</b> | 2186.1128      | 1093.5600        | 2185.1288      | 1093.0680        | 20 |
| 3  | <b>390.2387</b>  | 195.6230        |                |                  |                 |                  | L    | 2040.0760        | <b>1020.5417</b> | 2023.0495      | 1012.0284        | 2022.0655      | 1011.5364        | 19 |
| 4  | <b>447.2602</b>  | 224.1337        |                |                  |                 |                  | G    | 1926.9920        | <b>963.9996</b>  | 1909.9654      | 955.4863         | 1908.9814      | 954.9943         | 18 |
| 5  | 534.2922         | 267.6498        |                |                  | <b>516.2817</b> | 258.6445         | S    | 1869.9705        | <b>935.4889</b>  | 1852.9440      | 926.9756         | 1851.9599      | 926.4836         | 17 |
| 6  | 648.3352         | 324.6712        | 631.3086       | 316.1579         | 630.3246        | 315.6659         | N    | 1782.9385        | <b>891.9729</b>  | 1765.9119      | 883.4596         | 1764.9279      | 882.9676         | 16 |
| 7  | 763.3621         | 382.1847        | 746.3355       | 373.6714         | 745.3515        | 373.1794         | N    | 1668.8955        | <b>834.9514</b>  | 1651.8690      | 826.4381         | 1650.8850      | 825.9461         | 15 |
| 8  | 876.4462         | 438.7267        | 859.4196       | 430.2134         | 858.4356        | 429.7214         | L    | <b>1553.8686</b> | 777.4379         | 1536.8421      | 768.9247         | 1535.8580      | 768.4327         | 14 |
| 9  | 977.4938         | 489.2506        | 960.4673       | 480.7373         | 959.4833        | 480.2453         | T    | 1440.7845        | <b>720.8959</b>  | 1423.7580      | 712.3826         | 1422.7740      | 711.8906         | 13 |
| 10 | 1048.5310        | 524.7691        | 1031.5044      | <b>516.2558</b>  | 1030.5204       | <b>515.7638</b>  | A    | <b>1339.7369</b> | <b>670.3721</b>  | 1322.7103      | 661.8588         | 1321.7263      | 661.3668         | 12 |
| 11 | <b>1161.6150</b> | 581.3111        | 1144.5885      | 572.7979         | 1143.6045       | 572.3059         | L    | <b>1268.6997</b> | 634.8535         | 1251.6732      | 626.3402         | 1250.6892      | 625.8482         | 11 |
| 12 | <b>1298.6739</b> | 649.8406        | 1281.6474      | 641.3273         | 1280.6634       | 640.8353         | H    | <b>1155.6157</b> | <b>578.3115</b>  | 1138.5891      | <b>569.7982</b>  | 1137.6051      | <b>569.3062</b>  | 10 |
| 13 | 1395.7267        | 698.3670        | 1378.7001      | 689.8537         | 1377.7161       | 689.3617         | P    | 1018.5568        | <b>509.7820</b>  | 1001.5302      | 501.2688         | 1000.5462      | 500.7767         | 9  |
| 14 | 1466.7638        | 733.8855        | 1449.7373      | 725.3723         | 1448.7532       | 724.8803         | A    | 921.5040         | 461.2556         | 904.4775       | 452.7424         | 903.4934       | 452.2504         | 8  |
| 15 | <b>1579.8479</b> | 790.4276        | 1562.8213      | 781.9143         | 1561.8373       | 781.4223         | L    | 850.4669         | 425.7371         | 833.4403       | 417.2238         | 832.4563       | 416.7318         | 7  |
| 16 | <b>1726.9163</b> | 863.9618        | 1709.8897      | 855.4485         | 1708.9057       | 854.9565         | F    | 737.3828         | 369.1951         | 720.3563       | 360.6818         | 719.3723       | 360.1898         | 6  |
| 17 | 1854.9749        | 927.9911        | 1837.9483      | 919.4778         | 1836.9643       | 918.9858         | Q    | 590.3144         | 295.6608         | 573.2879       | 287.1476         | 572.3039       | 286.6556         | 5  |
| 18 | 1970.0018        | 985.5045        | 1952.9753      | 976.9913         | 1951.9912       | 976.4993         | N    | 462.2558         | 231.6316         | 445.2293       | 223.1183         | 444.2453       | 222.6263         | 4  |
| 19 | 2083.0859        | 1042.0466       | 2066.0593      | 1033.5333        | 2065.0753       | 1033.0413        | L    | <b>347.2289</b>  | 174.1181         | 330.2023       | 165.6048         | 329.2183       | 165.1128         | 3  |
| 20 | 2170.1179        | 1085.5626       | 2153.0913      | 1077.0493        | 2152.1073       | 1076.5573        | S    | 234.1448         | 117.5761         | 217.1183       | 109.0628         | 216.1343       | 108.5708         | 2  |
| 21 |                  |                 |                |                  |                 |                  | K    | 147.1128         | 74.0600          | 130.0863       | 65.5468          |                |                  | 1  |

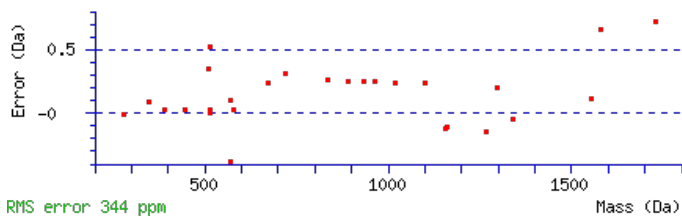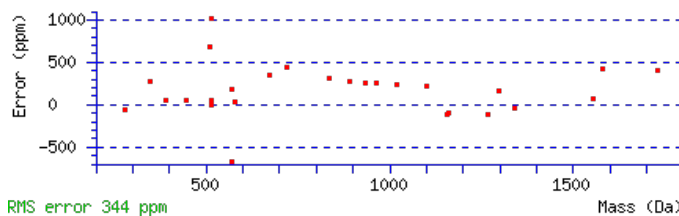

NCBI BLAST search of [LYLGSNNLTALHPALFQNL SK](#)

(Parameters: blastp, nr protein database, expect=20000, no filter, PAM30)

Other BLAST [web gateways](#)

**All matches to this query**

| Score | Mr(calc)  | Delta  | Sequence                               | Site Analysis             |
|-------|-----------|--------|----------------------------------------|---------------------------|
| 52.8  | 2315.2161 | 0.0046 | <a href="#">LYLGSNNLTALHPALFQNL SK</a> | Deamidated N7, N18 24.11% |
| 52.8  | 2315.2161 | 0.0046 | <a href="#">LYLGSNNLTALHPALFQNL SK</a> | Deamidated N7, Q17 24.11% |
| 52.8  | 2315.2161 | 0.0046 | <a href="#">LYLGSNNLTALHPALFQNL SK</a> | Deamidated N6, N18 24.11% |
| 52.8  | 2315.2161 | 0.0046 | <a href="#">LYLGSNNLTALHPALFQNL SK</a> | Deamidated N6, Q17 24.11% |
| 44.4  | 2315.2161 | 0.0046 | <a href="#">LYLGSNNLTALHPALFQNL SK</a> | Deamidated Q17, N18 3.48% |
| 28.4  | 2315.2161 | 0.0046 | <a href="#">LYLGSNNLTALHPALFQNL SK</a> | Deamidated N6, N7 0.09%   |
| 6.7   | 2314.2216 | 0.9991 | <a href="#">GPSHIPTLRSGIVMEVPPGNTR</a> |                           |
| 6.4   | 2315.2154 | 0.0053 | <a href="#">EMLQRAARSPSIALQLITGNK</a>  |                           |
| 5.9   | 2314.2251 | 0.9956 | <a href="#">LAGLPMIPLLQMQNYSIWMK</a>   |                           |
| 4.9   | 2314.2090 | 1.0118 | <a href="#">LDLKVLVMNNQLEALTQDQK</a>   |                           |

Mascot: <http://www.matrixscience.com/>

# MASCOT SCIENCE Mascot Search Results

## Peptide View

MS/MS Fragmentation of **VTQVYAENGTVLQGSTVASVYK**

Found in **F5H4W9** in **con\_Xuniprot\_HUMAN3**, F5H4W9\_HUMAN Serum paraoxonase/arylesterase 1 OS=Homo sapiens GN=PON1 PE=2 SV=1

Match to Query 15361: 2314.178848 from(1158.096700,2+) intensity(17772.5078) rtinseconds(1408) scans(3617) index(23902)

Title: 111019\_Est\_ML\_YS\_G\_05Spectrum3117\_scans\_\_3617

Data file C:\mascot\20140703\_Tmgf\_1D\CSV\_UseAnalysis\MasterCSV\All\_Glyco\mgf\ptm\UC18ERLIC\_PTM\_35D.mgf

Click mouse within plot area to zoom in by factor of two about that point

Or,  to  Da

Label all possible matches  Label matches used for scoring

Show Y-axis

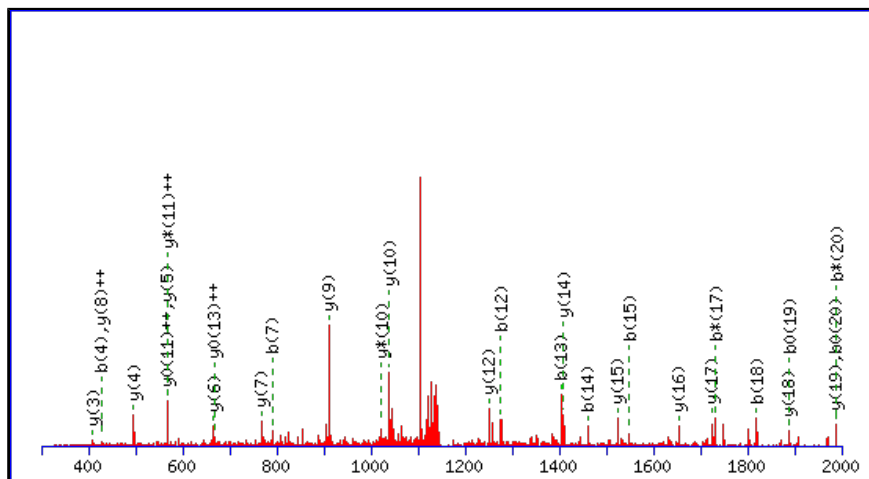

Monoisotopic mass of neutral peptide Mr(calc): 2314.1693

Fixed modifications: Carbamidomethyl (C) (apply to specified residues or termini only)

Variable modifications:

N8 : Deamidated (NQ)

Ions Score: 124 Expect: 1e-010

Matches : 30/240 fragment ions using 34 most intense peaks ([help](#))

| #  | b                | b <sup>++</sup> | b <sup>*</sup>   | b <sup>*++</sup> | b <sup>0</sup>   | b <sup>0++</sup> | Seq. | y                | y <sup>++</sup> | y <sup>*</sup>   | y <sup>*++</sup> | y <sup>0</sup> | y <sup>0++</sup> | #  |
|----|------------------|-----------------|------------------|------------------|------------------|------------------|------|------------------|-----------------|------------------|------------------|----------------|------------------|----|
| 1  | 100.0757         | 50.5415         |                  |                  |                  |                  | V    |                  |                 |                  |                  |                |                  | 22 |
| 2  | 201.1234         | 101.0653        |                  |                  | 183.1128         | 92.0600          | T    | 2216.1081        | 1108.5577       | 2199.0816        | 1100.0444        | 2198.0976      | 1099.5524        | 21 |
| 3  | 329.1819         | 165.0946        | 312.1554         | 156.5813         | 311.1714         | 156.0893         | Q    | 2115.0604        | 1058.0339       | 2098.0339        | 1049.5206        | 2097.0499      | 1049.0286        | 20 |
| 4  | <b>428.2504</b>  | 214.6288        | 411.2238         | 206.1155         | 410.2398         | 205.6235         | V    | <b>1987.0019</b> | 994.0046        | 1969.9753        | 985.4913         | 1968.9913      | 984.9993         | 19 |
| 5  | 591.3137         | 296.1605        | 574.2871         | 287.6472         | 573.3031         | 287.1552         | Y    | <b>1887.9335</b> | 944.4704        | 1870.9069        | 935.9571         | 1869.9229      | 935.4651         | 18 |
| 6  | 662.3508         | 331.6790        | 645.3243         | 323.1658         | 644.3402         | 322.6738         | A    | <b>1724.8701</b> | 862.9387        | 1707.8436        | 854.4254         | 1706.8596      | 853.9334         | 17 |
| 7  | <b>791.3934</b>  | 396.2003        | 774.3668         | 387.6871         | 773.3828         | 387.1951         | E    | <b>1653.8330</b> | 827.4201        | 1636.8065        | 818.9069         | 1635.8224      | 818.4149         | 16 |
| 8  | 906.4203         | 453.7138        | 889.3938         | 445.2005         | 888.4098         | 444.7085         | N    | <b>1524.7904</b> | 762.8988        | 1507.7639        | 754.3856         | 1506.7799      | 753.8936         | 15 |
| 9  | 963.4418         | 482.2245        | 946.4153         | 473.7113         | 945.4312         | 473.2193         | G    | <b>1409.7635</b> | 705.3854        | 1392.7369        | 696.8721         | 1391.7529      | 696.3801         | 14 |
| 10 | 1064.4895        | 532.7484        | 1047.4629        | 524.2351         | 1046.4789        | 523.7431         | T    | 1352.7420        | 676.8746        | 1335.7155        | 668.3614         | 1334.7314      | <b>667.8694</b>  | 13 |
| 11 | 1163.5579        | 582.2826        | 1146.5313        | 573.7693         | 1145.5473        | 573.2773         | V    | <b>1251.6943</b> | 626.3508        | 1234.6678        | 617.8375         | 1233.6838      | 617.3455         | 12 |
| 12 | <b>1276.6420</b> | 638.8246        | 1259.6154        | 630.3113         | 1258.6314        | 629.8193         | L    | 1152.6259        | 576.8166        | 1135.5994        | <b>568.3033</b>  | 1134.6154      | <b>567.8113</b>  | 11 |
| 13 | <b>1404.7005</b> | 702.8539        | 1387.6740        | 694.3406         | 1386.6900        | 693.8486         | Q    | <b>1039.5419</b> | 520.2746        | <b>1022.5153</b> | 511.7613         | 1021.5313      | 511.2693         | 10 |
| 14 | <b>1461.7220</b> | 731.3646        | 1444.6955        | 722.8514         | 1443.7114        | 722.3594         | G    | <b>911.4833</b>  | 456.2453        | 894.4567         | 447.7320         | 893.4727       | 447.2400         | 9  |
| 15 | <b>1548.7540</b> | 774.8807        | 1531.7275        | 766.3674         | 1530.7435        | 765.8754         | S    | 854.4618         | <b>427.7345</b> | 837.4353         | 419.2213         | 836.4512       | 418.7293         | 8  |
| 16 | 1649.8017        | 825.4045        | 1632.7752        | 816.8912         | 1631.7911        | 816.3992         | T    | <b>767.4298</b>  | 384.2185        | 750.4032         | 375.7053         | 749.4192       | 375.2132         | 7  |
| 17 | 1748.8701        | 874.9387        | <b>1731.8436</b> | 866.4254         | 1730.8596        | 865.9334         | V    | <b>666.3821</b>  | 333.6947        | 649.3556         | 325.1814         | 648.3715       | 324.6894         | 6  |
| 18 | <b>1819.9072</b> | 910.4573        | 1802.8807        | 901.9440         | 1801.8967        | 901.4520         | A    | <b>567.3137</b>  | 284.1605        | 550.2871         | 275.6472         | 549.3031       | 275.1552         | 5  |
| 19 | 1906.9393        | 953.9733        | 1889.9127        | 945.4600         | <b>1888.9287</b> | 944.9680         | S    | <b>496.2766</b>  | 248.6419        | 479.2500         | 240.1287         | 478.2660       | 239.6366         | 4  |
| 20 | 2006.0077        | 1003.5075       | <b>1988.9811</b> | 994.9942         | <b>1987.9971</b> | 994.5022         | V    | <b>409.2445</b>  | 205.1259        | 392.2180         | 196.6126         |                |                  | 3  |
| 21 | 2169.0710        | 1085.0391       | 2152.0445        | 1076.5259        | 2151.0604        | 1076.0339        | Y    | 310.1761         | 155.5917        | 293.1496         | 147.0784         |                |                  | 2  |
| 22 |                  |                 |                  |                  |                  |                  | K    | 147.1128         | 74.0600         | 130.0863         | 65.5468          |                |                  | 1  |

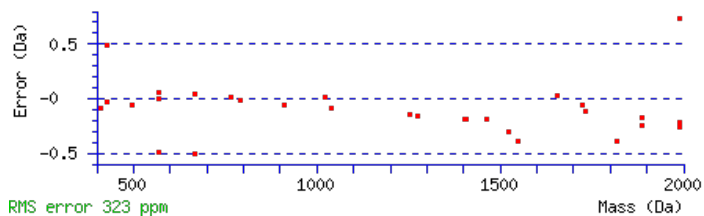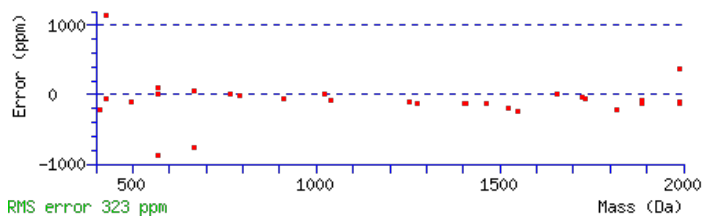

NCBI BLAST search of [VTQVYAENGTVLOGSTVASVYK](#)

(Parameters: blastp, nr protein database, expect=20000, no filter, PAM30)

Other BLAST [web gateways](#)

All matches to this query

| Score | Mr(calc)  | Delta  | Sequence                               | Site Analysis        |
|-------|-----------|--------|----------------------------------------|----------------------|
| 123.8 | 2314.1693 | 0.0096 | <a href="#">VTQVYAENGTVLOGSTVASVYK</a> | Deamidated N8 99.99% |
| 81.1  | 2314.1693 | 0.0096 | <a href="#">VTQVYAENGTVLOGSTVASVYK</a> | Deamidated Q13 0.01% |
| 76.1  | 2314.1693 | 0.0096 | <a href="#">VTQVYAENGTVLOGSTVASVYK</a> | Deamidated Q3 0.00%  |
| 73.4  | 2313.1853 | 0.9936 | <a href="#">VTQVYAENGTVLOGSTVASVYK</a> |                      |
| 3.7   | 2312.1794 | 1.9994 | <a href="#">HRDSLDSLQSLMASPSAAAVLK</a> |                      |

Mascot: <http://www.matrixscience.com/>



# MASCOT SCIENCE Mascot Search Results

## Peptide View

MS/MS Fragmentation of **VTQVYAENGTVLQGSTVASVYKGGK**

Found in **F5H4W9** in **con\_Xuniprot\_HUMAN3**, F5H4W9\_HUMAN Serum paraoxonase/arylesterase 1 OS=Homo sapiens GN=PON1 PE=2 SV=1

Match to Query 21583: 2499.298168 from(1250.656360,2+) intensity(28029.2520) rtinseconds(1616) scans(3612) index(16769)

Title: 111019\_Est\_ML\_YP\_G\_06Spectrum3011\_scans\_\_3612

Data file C:\mascot\20140703\_Tmgf\_1D\CSV\_UseAnalysis\MasterCSV\All\_Glyco\mgf\ptm\UC18ERLIC\_PTM\_35D.mgf

Click mouse within plot area to zoom in by factor of two about that point

Or, to Da

Label all possible matches Label matches used for scoring

Show Y-axis

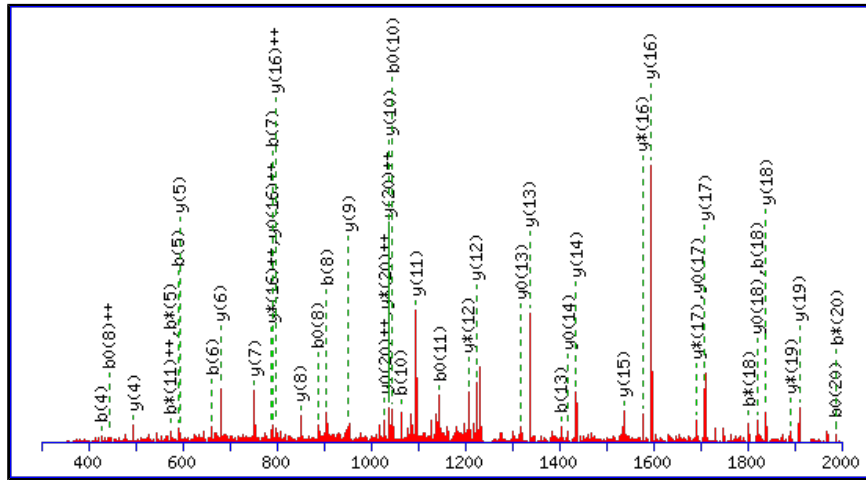

Monoisotopic mass of neutral peptide Mr(calc): 2499.2857

Fixed modifications: Carbamidomethyl (C) (apply to specified residues or termini only)

Variable modifications:

N8 : Deamidated (NQ)

Ions Score: 106 Expect: 4.5e-009

Matches : 47/260 fragment ions using 68 most intense peaks ([help](#))

| #  | b                | b <sup>++</sup> | b*               | b <sup>*++</sup> | b <sup>0</sup>   | b <sup>0++</sup> | Seq. | y                | y <sup>++</sup>  | y*               | y <sup>*++</sup> | y <sup>0</sup>   | y <sup>0++</sup> | #  |
|----|------------------|-----------------|------------------|------------------|------------------|------------------|------|------------------|------------------|------------------|------------------|------------------|------------------|----|
| 1  | 100.0757         | 50.5415         |                  |                  |                  |                  | V    |                  |                  |                  |                  |                  |                  | 24 |
| 2  | 201.1234         | 101.0653        |                  |                  | 183.1128         | 92.0600          | T    | 2401.2245        | 1201.1159        | 2384.1980        | 1192.6026        | 2383.2140        | 1192.1106        | 23 |
| 3  | 329.1819         | 165.0946        | 312.1554         | 156.5813         | 311.1714         | 156.0893         | Q    | 2300.1769        | 1150.5921        | 2283.1503        | 1142.0788        | 2282.1663        | 1141.5868        | 22 |
| 4  | <b>428.2504</b>  | 214.6288        | 411.2238         | 206.1155         | 410.2398         | 205.6235         | V    | 2172.1183        | 1086.5628        | 2155.0917        | 1078.0495        | 2154.1077        | 1077.5575        | 21 |
| 5  | <b>591.3137</b>  | 296.1605        | <b>574.2871</b>  | 287.6472         | 573.3031         | 287.1552         | Y    | 2073.0499        | <b>1037.0286</b> | 2056.0233        | <b>1028.5153</b> | 2055.0393        | <b>1028.0233</b> | 20 |
| 6  | <b>662.3508</b>  | 331.6790        | 645.3243         | 323.1658         | 644.3402         | 322.6738         | A    | <b>1909.9866</b> | 955.4969         | <b>1892.9600</b> | 946.9836         | 1891.9760        | 946.4916         | 19 |
| 7  | <b>791.3934</b>  | 396.2003        | 774.3668         | 387.6871         | 773.3828         | 387.1951         | E    | <b>1838.9494</b> | 919.9784         | 1821.9229        | 911.4651         | <b>1820.9389</b> | 910.9731         | 18 |
| 8  | <b>906.4203</b>  | 453.7138        | 889.3938         | 445.2005         | <b>888.4098</b>  | <b>444.7085</b>  | N    | <b>1709.9068</b> | 855.4571         | <b>1692.8803</b> | 846.9438         | <b>1691.8963</b> | 846.4518         | 17 |
| 9  | 963.4418         | 482.2245        | 946.4153         | 473.7113         | 945.4312         | 473.2193         | G    | <b>1594.8799</b> | <b>797.9436</b>  | <b>1577.8534</b> | <b>789.4303</b>  | 1576.8693        | <b>788.9383</b>  | 16 |
| 10 | <b>1064.4895</b> | 532.7484        | 1047.4629        | 524.2351         | <b>1046.4789</b> | 523.7431         | T    | <b>1537.8584</b> | 769.4329         | 1520.8319        | 760.9196         | 1519.8479        | 760.4276         | 15 |
| 11 | 1163.5579        | 582.2826        | 1146.5313        | <b>573.7693</b>  | <b>1145.5473</b> | 573.2773         | V    | <b>1436.8108</b> | 718.9090         | 1419.7842        | 710.3957         | <b>1418.8002</b> | 709.9037         | 14 |
| 12 | 1276.6420        | 638.8246        | 1259.6154        | 630.3113         | 1258.6314        | 629.8193         | L    | <b>1337.7423</b> | 669.3748         | 1320.7158        | 660.8615         | <b>1319.7318</b> | 660.3695         | 13 |
| 13 | <b>1404.7005</b> | 702.8539        | 1387.6740        | 694.3406         | 1386.6900        | 693.8486         | Q    | <b>1224.6583</b> | 612.8328         | <b>1207.6317</b> | 604.3195         | 1206.6477        | 603.8275         | 12 |
| 14 | 1461.7220        | 731.3646        | 1444.6955        | 722.8514         | 1443.7114        | 722.3594         | G    | <b>1096.5997</b> | 548.8035         | 1079.5732        | 540.2902         | 1078.5891        | 539.7982         | 11 |
| 15 | 1548.7540        | 774.8807        | 1531.7275        | 766.3674         | 1530.7435        | 765.8754         | S    | <b>1039.5782</b> | 520.2928         | 1022.5517        | 511.7795         | 1021.5677        | 511.2875         | 10 |
| 16 | 1649.8017        | 825.4045        | 1632.7752        | 816.8912         | 1631.7911        | 816.3992         | T    | <b>952.5462</b>  | 476.7767         | 935.5197         | 468.2635         | 934.5356         | 467.7715         | 9  |
| 17 | 1748.8701        | 874.9387        | 1731.8436        | 866.4254         | 1730.8596        | 865.9334         | V    | <b>851.4985</b>  | 426.2529         | 834.4720         | 417.7396         | 833.4880         | 417.2476         | 8  |
| 18 | <b>1819.9072</b> | 910.4573        | <b>1802.8807</b> | 901.9440         | 1801.8967        | 901.4520         | A    | <b>752.4301</b>  | 376.7187         | 735.4036         | 368.2054         | 734.4196         | 367.7134         | 7  |
| 19 | 1906.9393        | 953.9733        | 1889.9127        | 945.4600         | 1888.9287        | 944.9680         | S    | <b>681.3930</b>  | 341.2001         | 664.3665         | 332.6869         | 663.3824         | 332.1949         | 6  |
| 20 | 2006.0077        | 1003.5075       | <b>1988.9811</b> | 994.9942         | <b>1987.9971</b> | 994.5022         | V    | <b>594.3610</b>  | 297.6841         | 577.3344         | 289.1709         |                  |                  | 5  |
| 21 | 2169.0710        | 1085.0391       | 2152.0445        | 1076.5259        | 2151.0604        | 1076.0339        | Y    | <b>495.2926</b>  | 248.1499         | 478.2660         | 239.6366         |                  |                  | 4  |
| 22 | 2297.1660        | 1149.0866       | 2280.1394        | 1140.5733        | 2279.1554        | 1140.0813        | K    | 332.2292         | 166.6183         | 315.2027         | 158.1050         |                  |                  | 3  |
| 23 | 2354.1874        | 1177.5974       | 2337.1609        | 1169.0841        | 2336.1769        | 1168.5921        | G    | 204.1343         | 102.5708         | 187.1077         | 94.0575          |                  |                  | 2  |

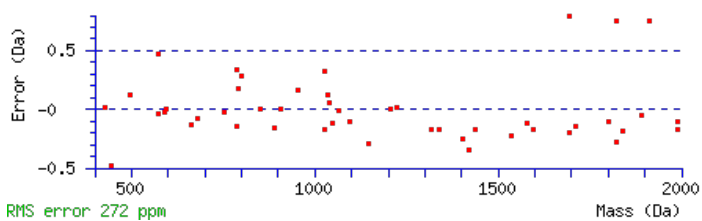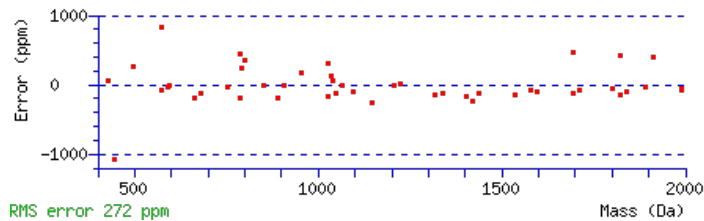

NCBI BLAST search of [VTQVYAENGTVLQGSTVASVYK GK](#)

(Parameters: blastp, nr protein database, expect=20000, no filter, PAM30)

Other BLAST [web gateways](#)

All matches to this query

| Score | Mr(calc)  | Delta  | Sequence                                  | Site Analysis        |
|-------|-----------|--------|-------------------------------------------|----------------------|
| 106.3 | 2499.2857 | 0.0125 | <a href="#">VTQVYAENGTVLQGSTVASVYK GK</a> | Deamidated N8 96.72% |
| 91.5  | 2499.2857 | 0.0125 | <a href="#">VTQVYAENGTVLQGSTVASVYK GK</a> | Deamidated Q13 3.20% |
| 75.3  | 2499.2857 | 0.0125 | <a href="#">VTQVYAENGTVLQGSTVASVYK GK</a> | Deamidated Q3 0.08%  |
| 72.8  | 2498.3017 | 0.9965 | <a href="#">VTQVYAENGTVLQGSTVASVYK GK</a> |                      |
| 0.4   | 2499.2870 | 0.0112 | <a href="#">VQWGPPGRLAQFQKT NVTSEVR</a>   |                      |

Mascot: <http://www.matrixscience.com/>

# MATRIX SCIENCE Mascot Search Results

## Peptide View

MS/MS Fragmentation of **HANWTLTPLK**

Found in **F5H4W9** in **con\_Xuniprot\_HUMAN3**, F5H4W9\_HUMAN Serum paraoxonase/arylesterase 1 OS=Homo sapiens GN=PON1 PE=2 SV=1

Match to Query 1619: 1180.627228 from(591.320890,2+) intensity(120399.2031) rtinseconds(1023) scans(2410) index(15705)

Title: 111019\_Est\_MI\_YP\_G\_05Spectrum2041\_scans\_2410

Data file C:\\mascot\\20140703\_Tmgf\_1D\\CSV\_UseAnalysis\\MasterCSV\\All\_Glyco\\mgf\\ptm\\UC18ERLIC\_PTM\_35D.mgf

Click mouse within plot area to zoom in by factor of two about that point

Or, to Da

Label all possible matches Label matches used for scoring

Show Y-axis

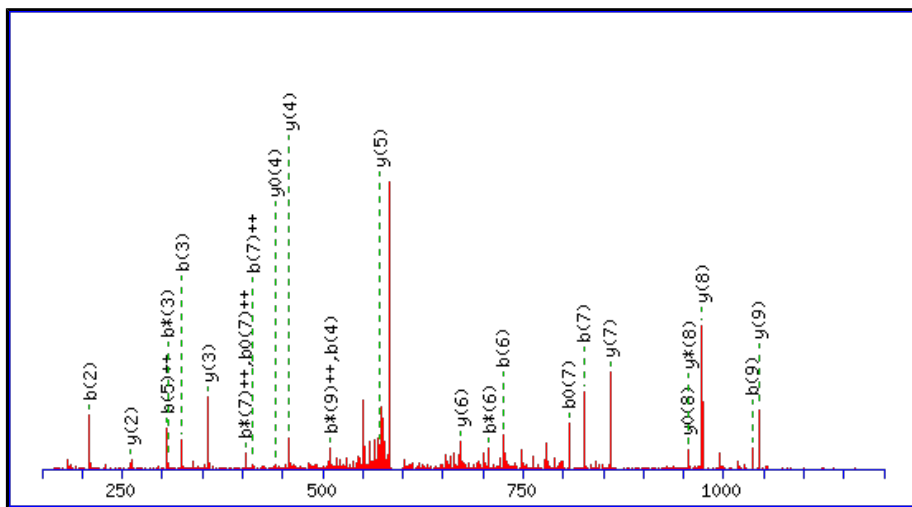

Monoisotopic mass of neutral peptide Mr(calc): 1180.6240

Fixed modifications: Carbamidomethyl (C) (apply to specified residues or termini only)

Variable modifications:

N3 : Deamidated (NQ)

Ions Score: 40 Expect: 0.013

Matches : 25/90 fragment ions using 60 most intense peaks ([help](#))

| #  | b                | b <sup>++</sup> | b <sup>*</sup>  | b <sup>***</sup> | b <sup>0</sup>  | b <sup>0++</sup> | Seq. | y                | y <sup>++</sup> | y <sup>*</sup>  | y <sup>***</sup> | y <sup>0</sup>  | y <sup>0++</sup> | #  |
|----|------------------|-----------------|-----------------|------------------|-----------------|------------------|------|------------------|-----------------|-----------------|------------------|-----------------|------------------|----|
| 1  | 138.0662         | 69.5367         |                 |                  |                 |                  | H    |                  |                 |                 |                  |                 |                  | 10 |
| 2  | <b>209.1033</b>  | 105.0553        |                 |                  |                 |                  | A    | <b>1044.5724</b> | 522.7899        | 1027.5459       | 514.2766         | 1026.5619       | 513.7846         | 9  |
| 3  | <b>324.1302</b>  | 162.5688        | <b>307.1037</b> | 154.0555         |                 |                  | N    | <b>973.5353</b>  | 487.2713        | <b>956.5088</b> | 478.7580         | <b>955.5247</b> | 478.2660         | 8  |
| 4  | <b>510.2096</b>  | 255.6084        | 493.1830        | 247.0951         |                 |                  | W    | <b>858.5084</b>  | 429.7578        | 841.4818        | 421.2445         | 840.4978        | 420.7525         | 7  |
| 5  | 611.2572         | <b>306.1323</b> | 594.2307        | 297.6190         | 593.2467        | 297.1270         | T    | <b>672.4291</b>  | 336.7182        | 655.4025        | 328.2049         | 654.4185        | 327.7129         | 6  |
| 6  | <b>724.3413</b>  | 362.6743        | <b>707.3148</b> | 354.1610         | 706.3307        | 353.6690         | L    | <b>571.3814</b>  | 286.1943        | 554.3548        | 277.6811         | 553.3708        | 277.1890         | 5  |
| 7  | <b>825.3890</b>  | <b>413.1981</b> | 808.3624        | <b>404.6849</b>  | <b>807.3784</b> | <b>404.1928</b>  | T    | <b>458.2973</b>  | 229.6523        | 441.2708        | 221.1390         | <b>440.2867</b> | 220.6470         | 4  |
| 8  | 922.4417         | 461.7245        | 905.4152        | 453.2112         | 904.4312        | 452.7192         | P    | <b>357.2496</b>  | 179.1285        | 340.2231        | 170.6152         |                 |                  | 3  |
| 9  | <b>1035.5258</b> | 518.2665        | 1018.4993       | <b>509.7533</b>  | 1017.5152       | 509.2613         | L    | <b>260.1969</b>  | 130.6021        | 243.1703        | 122.0888         |                 |                  | 2  |
| 10 |                  |                 |                 |                  |                 |                  | K    | 147.1128         | 74.0600         | 130.0863        | 65.5468          |                 |                  | 1  |

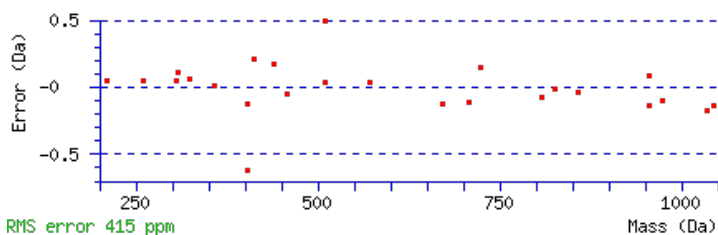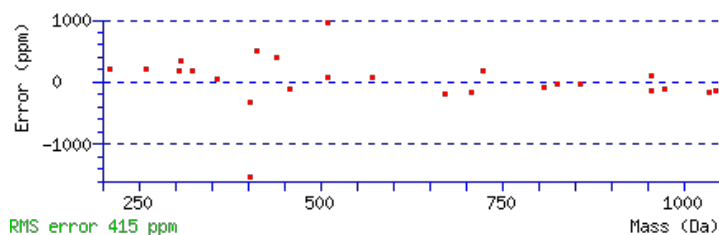

NCBI BLAST search of **HANWTLTPLK**

(Parameters: blastp, nr protein database, expect=20000, no filter, PAM30)

Other BLAST [web gateways](#)

**All matches to this query**

| Score | Mr(calc)  | Delta   | Sequence                     |
|-------|-----------|---------|------------------------------|
| 40.3  | 1180.6240 | 0.0032  | <a href="#">HANWTLTPLK</a>   |
| 2.3   | 1180.6274 | -0.0002 | <a href="#">GSGPPGCLVLPK</a> |

**Mascot:** <http://www.matrixscience.com/>

# MASCOT SCIENCE Mascot Search Results

## Peptide View

MS/MS Fragmentation of **FLNDTMAVYEAK**

Found in **P29622** in **con\_Xuniprot\_HUMAN3**, KAIN\_HUMAN Kallistatin OS=Homo sapiens GN=SERPINA4 PE=1 SV=3

Match to Query 2410: 1401.652948 from(701.833750,2+) intensity(68505.5391) rtinseconds(1371) scans(3249) index(12559)

Title: 111019\_Est\_ISCardio\_NMI\_YS\_G\_9Spectrum2834\_scans\_\_3249

Data file C:\\mascot\\20140703\_Tmgf\_1D\\CSV\_UseAnalysis\\MasterCSV\\All\_Glyco\\mgf\\ptm\\UC18ERLIC\_PTM\_35D.mgf

Click mouse within plot area to zoom in by factor of two about that point

Or, to Da

Label all possible matches Label matches used for scoring

Show Y-axis

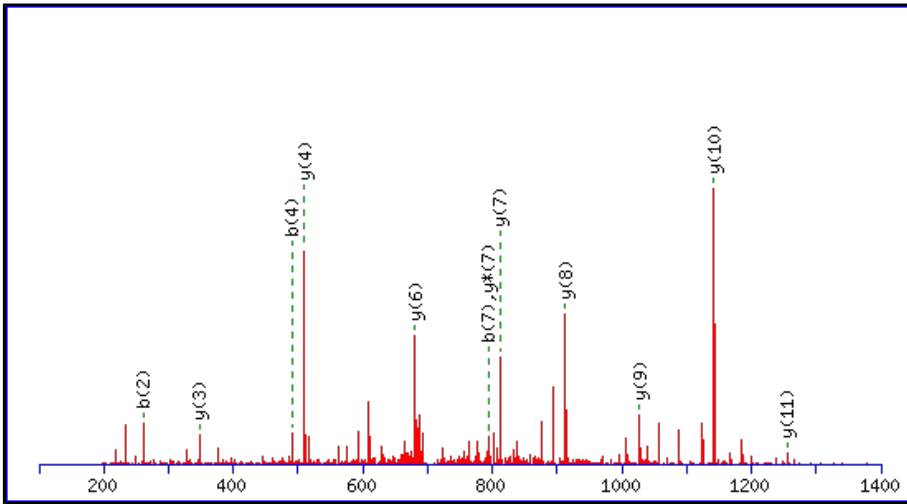

Monoisotopic mass of neutral peptide  $M_r(\text{calc})$ : 1401.6486

Fixed modifications: Carbamidomethyl (C) (apply to specified residues or termini only)

Variable modifications:

N3 : Deamidated (NQ)

Ions Score: 78 Expect: 2.4e-006

Matches : 12/118 fragment ions using 12 most intense peaks ([help](#))

| #  | b               | b <sup>++</sup> | b*        | b <sup>***</sup> | b <sup>0</sup> | b <sup>0++</sup> | Seq. | y                | y <sup>++</sup> | y*              | y <sup>***</sup> | y <sup>0</sup> | y <sup>0++</sup> | #  |
|----|-----------------|-----------------|-----------|------------------|----------------|------------------|------|------------------|-----------------|-----------------|------------------|----------------|------------------|----|
| 1  | 148.0757        | 74.5415         |           |                  |                |                  | F    |                  |                 |                 |                  |                |                  | 12 |
| 2  | <b>261.1598</b> | 131.0835        |           |                  |                |                  | L    | <b>1255.5875</b> | 628.2974        | 1238.5609       | 619.7841         | 1237.5769      | 619.2921         | 11 |
| 3  | 376.1867        | 188.5970        | 359.1601  | 180.0837         |                |                  | N    | <b>1142.5034</b> | 571.7553        | 1125.4769       | 563.2421         | 1124.4929      | 562.7501         | 10 |
| 4  | <b>491.2136</b> | 246.1105        | 474.1871  | 237.5972         | 473.2031       | 237.1052         | D    | <b>1027.4765</b> | 514.2419        | 1010.4499       | 505.7286         | 1009.4659      | 505.2366         | 9  |
| 5  | 592.2613        | 296.6343        | 575.2348  | 288.1210         | 574.2508       | 287.6290         | T    | <b>912.4495</b>  | 456.7284        | 895.4230        | 448.2151         | 894.4390       | 447.7231         | 8  |
| 6  | 723.3018        | 362.1545        | 706.2753  | 353.6413         | 705.2912       | 353.1493         | M    | <b>811.4019</b>  | 406.2046        | <b>794.3753</b> | 397.6913         | 793.3913       | 397.1993         | 7  |
| 7  | <b>794.3389</b> | 397.6731        | 777.3124  | 389.1598         | 776.3284       | 388.6678         | A    | <b>680.3614</b>  | 340.6843        | 663.3348        | 332.1710         | 662.3508       | 331.6790         | 6  |
| 8  | 893.4073        | 447.2073        | 876.3808  | 438.6940         | 875.3968       | 438.2020         | V    | 609.3243         | 305.1658        | 592.2977        | 296.6525         | 591.3137       | 296.1605         | 5  |
| 9  | 1056.4707       | 528.7390        | 1039.4441 | 520.2257         | 1038.4601      | 519.7337         | Y    | <b>510.2558</b>  | 255.6316        | 493.2293        | 247.1183         | 492.2453       | 246.6263         | 4  |
| 10 | 1185.5133       | 593.2603        | 1168.4867 | 584.7470         | 1167.5027      | 584.2550         | E    | <b>347.1925</b>  | 174.0999        | 330.1660        | 165.5866         | 329.1819       | 165.0946         | 3  |
| 11 | 1256.5504       | 628.7788        | 1239.5238 | 620.2655         | 1238.5398      | 619.7735         | A    | 218.1499         | 109.5786        | 201.1234        | 101.0653         |                |                  | 2  |
| 12 |                 |                 |           |                  |                |                  | K    | 147.1128         | 74.0600         | 130.0863        | 65.5468          |                |                  | 1  |

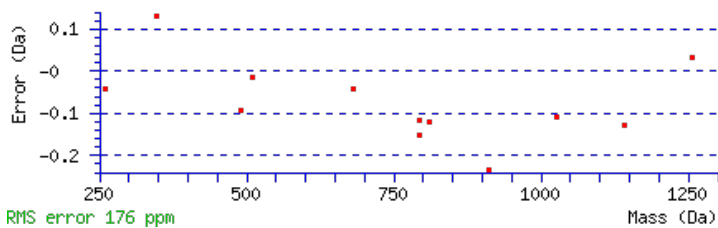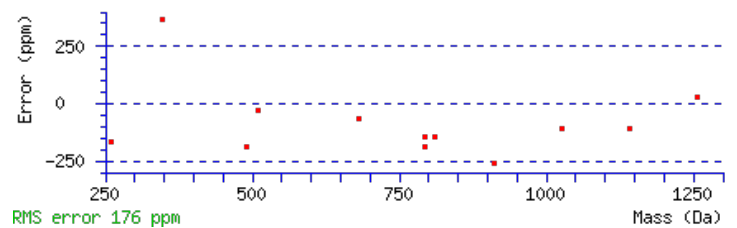

NCBI **BLAST** search of [FLNDTMAVYEAK](#)

(Parameters: blastp, nr protein database, expect=20000, no filter, PAM30)

Other BLAST [web gateways](#)

**All matches to this query**

| Score | Mr(calc)  | Delta   | Sequence                       |
|-------|-----------|---------|--------------------------------|
| 77.6  | 1401.6486 | 0.0044  | <a href="#">FLNDTMAVYEAK</a>   |
| 15.4  | 1401.6558 | -0.0029 | <a href="#">MLNGTHGPSSEKK</a>  |
| 15.3  | 1400.6532 | 0.9998  | <a href="#">STHNASVGGESDIK</a> |
| 10.3  | 1400.6428 | 1.0102  | <a href="#">NVTEMAMNPHIK</a>   |
| 8.2   | 1400.6502 | 1.0028  | <a href="#">YVSCGMMEALLK</a>   |
| 7.7   | 1400.6428 | 1.0102  | <a href="#">NVTEMAMNPHIK</a>   |
| 6.6   | 1400.6493 | 1.0036  | <a href="#">MQYTSAVTENIK</a>   |
| 5.8   | 1401.6486 | 0.0044  | <a href="#">MEDEFAKELYK</a>    |
| 5.7   | 1400.6428 | 1.0102  | <a href="#">NVTEMAMNPHIK</a>   |
| 3.7   | 1400.6428 | 1.0102  | <a href="#">IHPNMAMETVNK</a>   |

**Mascot:** <http://www.matrixscience.com/>

# MASCOT SCIENCE Mascot Search Results

## Peptide View

MS/MS Fragmentation of **DFYVDENTTVR**

Found in **P29622** in **con\_Xuniprot\_HUMAN3**, KAIN\_HUMAN Kallistatin OS=Homo sapiens GN=SERPINA4 PE=1 SV=3

Match to Query 2374: 1358.602648 from(680.308600,2+) intensity(12927.8008) rtinseconds(955) scans(2046) index(27775)

Title: 111019\_Est\_MI\_YS\_G\_11Spectrum1741\_scans\_\_2046

Data file C:\\mascot\\20140703\_Tmgf\_1D\\CSV\_UseAnalysis\\MasterCSV\\All\_Glyco\\mgf\\ptm\\UC18ERLIC\_PTM\_35D.mgf

Click mouse within plot area to zoom in by factor of two about that point

Or, to Da

Label all possible matches Label matches used for scoring

Show Y-axis

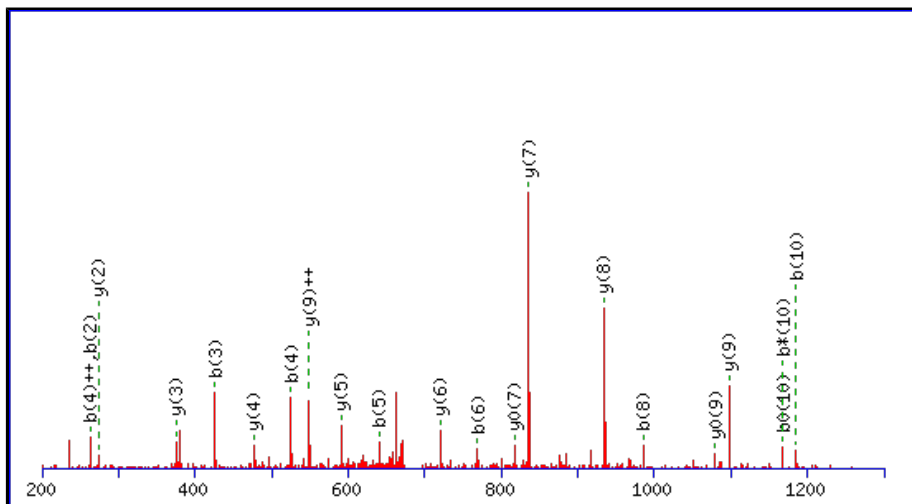

Monoisotopic mass of neutral peptide **Mr(calc)**: 1358.5990

Fixed modifications: Carbamidomethyl (C) (apply to specified residues or termini only)

Variable modifications:

N7 : Deamidated (NQ)

Ions Score: 55 Expect: 0.00025

Matches : 21/104 fragment ions using 33 most intense peaks ([help](#))

| #  | b                | b <sup>++</sup> | b <sup>*</sup>   | b <sup>*++</sup> | b <sup>0</sup>   | b <sup>0++</sup> | Seq. | y                | y <sup>++</sup> | y <sup>*</sup> | y <sup>*++</sup> | y <sup>0</sup>   | y <sup>0++</sup> | #  |
|----|------------------|-----------------|------------------|------------------|------------------|------------------|------|------------------|-----------------|----------------|------------------|------------------|------------------|----|
| 1  | 116.0342         | 58.5207         |                  |                  | 98.0237          | 49.5155          | D    |                  |                 |                |                  |                  |                  | 11 |
| 2  | <b>263.1026</b>  | 132.0550        |                  |                  | 245.0921         | 123.0497         | F    | 1244.5794        | 622.7933        | 1227.5528      | 614.2800         | 1226.5688        | 613.7880         | 10 |
| 3  | <b>426.1660</b>  | 213.5866        |                  |                  | 408.1554         | 204.5813         | Y    | <b>1097.5109</b> | <b>549.2591</b> | 1080.4844      | 540.7458         | <b>1079.5004</b> | 540.2538         | 9  |
| 4  | <b>525.2344</b>  | <b>263.1208</b> |                  |                  | 507.2238         | 254.1155         | V    | <b>934.4476</b>  | 467.7274        | 917.4211       | 459.2142         | 916.4371         | 458.7222         | 8  |
| 5  | <b>640.2613</b>  | 320.6343        |                  |                  | 622.2508         | 311.6290         | D    | <b>835.3792</b>  | 418.1932        | 818.3527       | 409.6800         | <b>817.3686</b>  | 409.1880         | 7  |
| 6  | <b>769.3039</b>  | 385.1556        |                  |                  | 751.2933         | 376.1503         | E    | <b>720.3523</b>  | 360.6798        | 703.3257       | 352.1665         | 702.3417         | 351.6745         | 6  |
| 7  | 884.3309         | 442.6691        | 867.3043         | 434.1558         | 866.3203         | 433.6638         | N    | <b>591.3097</b>  | 296.1585        | 574.2831       | 287.6452         | 573.2991         | 287.1532         | 5  |
| 8  | <b>985.3785</b>  | 493.1929        | 968.3520         | 484.6796         | 967.3680         | 484.1876         | T    | <b>476.2827</b>  | 238.6450        | 459.2562       | 230.1317         | 458.2722         | 229.6397         | 4  |
| 9  | 1086.4262        | 543.7167        | 1069.3997        | 535.2035         | 1068.4156        | 534.7115         | T    | <b>375.2350</b>  | 188.1212        | 358.2085       | 179.6079         | 357.2245         | 179.1159         | 3  |
| 10 | <b>1185.4946</b> | 593.2510        | <b>1168.4681</b> | 584.7377         | <b>1167.4841</b> | 584.2457         | V    | <b>274.1874</b>  | 137.5973        | 257.1608       | 129.0840         |                  |                  | 2  |
| 11 |                  |                 |                  |                  |                  |                  | R    | 175.1190         | 88.0631         | 158.0924       | 79.5498          |                  |                  | 1  |

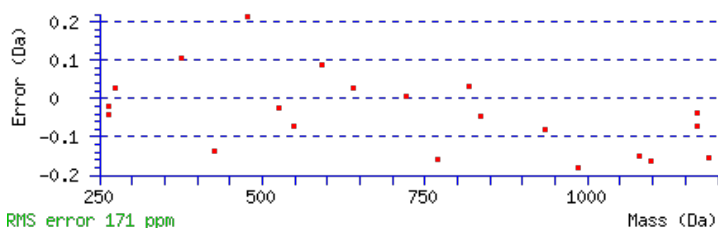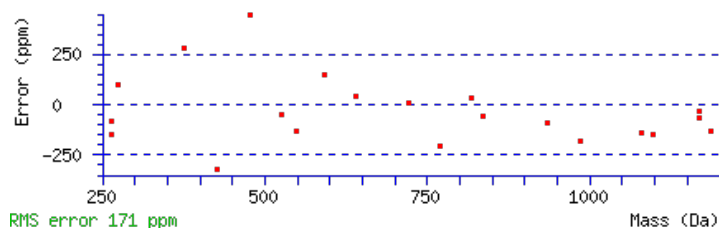

NCBI BLAST search of **DFYVDENTTVR**

(Parameters: blastp, nr protein database, expect=20000, no filter, PAM30)



Other BLAST [web gateways](#)

**All matches to this query**

| Score | Mr(calc)  | Delta   | Sequence                      |
|-------|-----------|---------|-------------------------------|
| 54.9  | 1358.5990 | 0.0036  | <a href="#">DFYVDENTTVR</a>   |
| 10.9  | 1356.5941 | 2.0086  | <a href="#">MNELEAFNMLK</a>   |
| 6.9   | 1356.5941 | 2.0086  | <a href="#">MNELEAFNMLK</a>   |
| 5.4   | 1357.6006 | 1.0020  | <a href="#">MLDMSFKDAER</a>   |
| 4.9   | 1358.6062 | -0.0036 | <a href="#">LSAHVDDSGSQSR</a> |
| 4.7   | 1358.5993 | 0.0034  | <a href="#">VMCVSMGSTTVR</a>  |
| 4.0   | 1358.5959 | 0.0068  | <a href="#">QLFSKGEMCSR</a>   |
| 3.6   | 1358.6071 | -0.0044 | <a href="#">MYMRQTESTGR</a>   |
| 3.5   | 1356.5980 | 2.0047  | <a href="#">DFEVSMNTRNK</a>   |
| 3.3   | 1358.5990 | 0.0037  | <a href="#">ENEEAYKESDK</a>   |

**Mascot:** <http://www.matrixscience.com/>

# MASCOT SCIENCE Mascot Search Results

## Peptide View

MS/MS Fragmentation of **SQILEGLGFNLTESESDVHR**

Found in **P29622** in **con\_Xuniprot\_HUMAN3**, KAIN\_HUMAN Kallistatin OS=Homo sapiens GN=SERPINA4 PE=1 SV=3

Match to Query 15496: 2344.163532 from(782.395120,3+) intensity(18527.3359) rtinseconds(2314) scans(6073) index(19855)

Title: 111019\_Est\_ML\_YP\_G\_09Spectrum5373\_scans\_\_6073

Data file C:\mascot\20140703\_Tmgf\_1D\CSV\_UseAnalysis\MasterCSV\All\_Glyco\mgf\ptm\UC18ERLIC\_PTM\_35D.mgf

Click mouse within plot area to zoom in by factor of two about that point

Or, to Da

Label all possible matches Label matches used for scoring

Show Y-axis

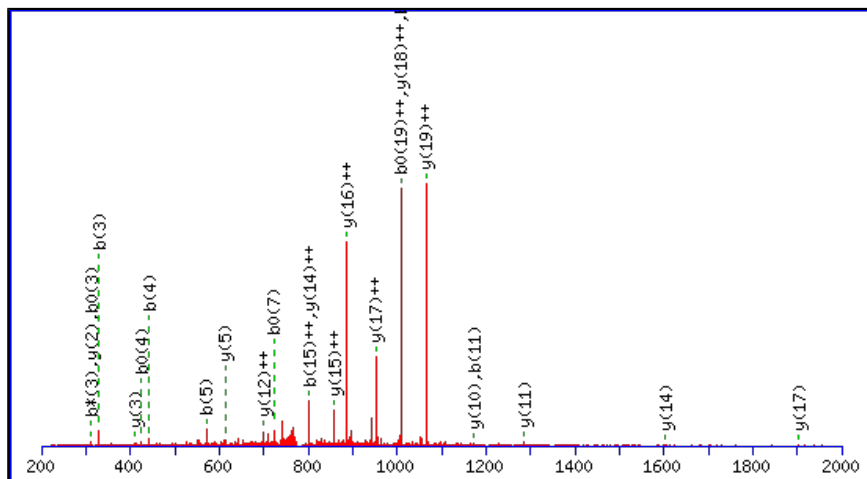

Monoisotopic mass of neutral peptide Mr(calc): 2344.1546

Fixed modifications: Carbamidomethyl (C) (apply to specified residues or termini only)

Variable modifications:

N10 : Deamidated (NQ)

Ions Score: 50 Expect: 0.0029

Matches : 25/232 fragment ions using 36 most intense peaks ([help](#))

| #  | b                | b <sup>++</sup> | b*              | b <sup>*++</sup> | b <sup>0</sup>  | b <sup>0++</sup> | Seq. | y                | y <sup>++</sup>  | y*        | y <sup>*++</sup> | y <sup>0</sup> | y <sup>0++</sup> | #  |
|----|------------------|-----------------|-----------------|------------------|-----------------|------------------|------|------------------|------------------|-----------|------------------|----------------|------------------|----|
| 1  | 88.0393          | 44.5233         |                 |                  | 70.0287         | 35.5180          | S    |                  |                  |           |                  |                |                  | 21 |
| 2  | 216.0979         | 108.5526        | 199.0713        | 100.0393         | 198.0873        | 99.5473          | Q    | 2258.1299        | 1129.5686        | 2241.1034 | 1121.0553        | 2240.1194      | 1120.5633        | 20 |
| 3  | <b>329.1819</b>  | 165.0946        | <b>312.1554</b> | 156.5813         | <b>311.1714</b> | 156.0893         | I    | 2130.0713        | <b>1065.5393</b> | 2113.0448 | 1057.0260        | 2112.0608      | 1056.5340        | 19 |
| 4  | <b>442.2660</b>  | 221.6366        | 425.2395        | 213.1234         | <b>424.2554</b> | 212.6314         | L    | 2016.9873        | <b>1008.9973</b> | 1999.9607 | 1000.4840        | 1998.9767      | 999.9920         | 18 |
| 5  | <b>571.3086</b>  | 286.1579        | 554.2821        | 277.6447         | 553.2980        | 277.1527         | E    | <b>1903.9032</b> | <b>952.4552</b>  | 1886.8767 | 943.9420         | 1885.8926      | 943.4500         | 17 |
| 6  | 628.3301         | 314.6687        | 611.3035        | 306.1554         | 610.3195        | 305.6634         | G    | 1774.8606        | <b>887.9339</b>  | 1757.8341 | 879.4207         | 1756.8501      | 878.9287         | 16 |
| 7  | 741.4141         | 371.2107        | 724.3876        | 362.6974         | <b>723.4036</b> | 362.2054         | L    | 1717.8392        | <b>859.4232</b>  | 1700.8126 | 850.9099         | 1699.8286      | 850.4179         | 15 |
| 8  | 798.4356         | 399.7214        | 781.4090        | 391.2082         | 780.4250        | 390.7162         | G    | <b>1604.7551</b> | <b>802.8812</b>  | 1587.7285 | 794.3679         | 1586.7445      | 793.8759         | 14 |
| 9  | 945.5040         | 473.2556        | 928.4775        | 464.7424         | 927.4934        | 464.2504         | F    | 1547.7336        | 774.3705         | 1530.7071 | 765.8572         | 1529.7231      | 765.3652         | 13 |
| 10 | 1060.5310        | 530.7691        | 1043.5044       | 522.2558         | 1042.5204       | 521.7638         | N    | 1400.6652        | <b>700.8362</b>  | 1383.6387 | 692.3230         | 1382.6546      | 691.8310         | 12 |
| 11 | <b>1173.6150</b> | 587.3111        | 1156.5885       | 578.7979         | 1155.6045       | 578.3059         | L    | <b>1285.6383</b> | 643.3228         | 1268.6117 | 634.8095         | 1267.6277      | 634.3175         | 11 |
| 12 | 1274.6627        | 637.8350        | 1257.6361       | 629.3217         | 1256.6521       | 628.8297         | T    | <b>1172.5542</b> | 586.7807         | 1155.5277 | 578.2675         | 1154.5436      | 577.7755         | 10 |
| 13 | 1403.7053        | 702.3563        | 1386.6787       | 693.8430         | 1385.6947       | 693.3510         | E    | 1071.5065        | 536.2569         | 1054.4800 | 527.7436         | 1053.4960      | 527.2516         | 9  |
| 14 | 1516.7894        | 758.8983        | 1499.7628       | 750.3850         | 1498.7788       | 749.8930         | L    | 942.4639         | 471.7356         | 925.4374  | 463.2223         | 924.4534       | 462.7303         | 8  |
| 15 | 1603.8214        | <b>802.4143</b> | 1586.7948       | 793.9011         | 1585.8108       | 793.4090         | S    | 829.3799         | 415.1936         | 812.3533  | 406.6803         | 811.3693       | 406.1883         | 7  |
| 16 | 1732.8640        | 866.9356        | 1715.8374       | 858.4224         | 1714.8534       | 857.9303         | E    | 742.3478         | 371.6776         | 725.3213  | 363.1643         | 724.3373       | 362.6723         | 6  |
| 17 | 1819.8960        | 910.4516        | 1802.8695       | 901.9384         | 1801.8854       | 901.4464         | S    | <b>613.3052</b>  | 307.1563         | 596.2787  | 298.6430         | 595.2947       | 298.1510         | 5  |
| 18 | 1934.9229        | 967.9651        | 1917.8964       | 959.4518         | 1916.9124       | 958.9598         | D    | 526.2732         | 263.6402         | 509.2467  | 255.1270         | 508.2627       | 254.6350         | 4  |
| 19 | 2033.9914        | 1017.4993       | 2016.9648       | <b>1008.9860</b> | 2015.9808       | <b>1008.4940</b> | V    | <b>411.2463</b>  | 206.1268         | 394.2197  | 197.6135         |                |                  | 3  |
| 20 | 2171.0503        | 1086.0288       | 2154.0237       | 1077.5155        | 2153.0397       | 1077.0235        | H    | <b>312.1779</b>  | 156.5926         | 295.1513  | 148.0793         |                |                  | 2  |
| 21 |                  |                 |                 |                  |                 |                  | R    | 175.1190         | 88.0631          | 158.0924  | 79.5498          |                |                  | 1  |

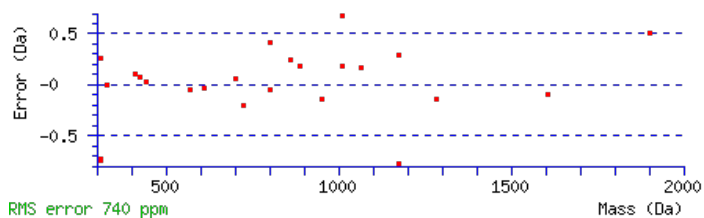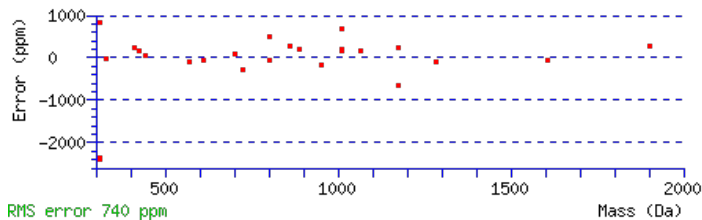

NCBI BLAST search of [SQILEGLGFNLTESESDVHR](#)

(Parameters: blastp, nr protein database, expect=20000, no filter, PAM30)

Other BLAST [web gateways](#)

All matches to this query

| Score | Mr(calc)  | Delta   | Sequence                             | Site Analysis         |
|-------|-----------|---------|--------------------------------------|-----------------------|
| 49.5  | 2344.1546 | 0.0089  | <a href="#">SQILEGLGFNLTESESDVHR</a> | Deamidated N10 98.41% |
| 39.7  | 2343.1706 | 0.9929  | <a href="#">SQILEGLGFNLTESESDVHR</a> |                       |
| 31.6  | 2344.1546 | 0.0089  | <a href="#">SQILEGLGFNLTESESDVHR</a> | Deamidated Q2 1.59%   |
| 15.4  | 2343.1594 | 1.0042  | <a href="#">GSAIELFHSSIAEVENEELR</a> |                       |
| 13.0  | 2342.1650 | 1.9985  | <a href="#">MYFIQHGVSVLTKGNKEMK</a>  |                       |
| 7.1   | 2342.1650 | 1.9985  | <a href="#">VLLMLVDGIDPNFKMEHQNK</a> |                       |
| 7.1   | 2342.1650 | 1.9985  | <a href="#">VLLMLVDGIDPNFKMEHQNK</a> |                       |
| 7.1   | 2342.1650 | 1.9985  | <a href="#">VLLMLVDGIDPNFKMEHQNK</a> |                       |
| 7.1   | 2344.1645 | -0.0010 | <a href="#">ITLLENNDQRLAVLEEETNK</a> |                       |
| 7.1   | 2344.1645 | -0.0010 | <a href="#">ITLLENNDQRLAVLEEETNK</a> |                       |

Mascot: <http://www.matrixscience.com/>

# MASCOT SCIENCE Mascot Search Results

## Peptide View

MS/MS Fragmentation of **EVYPWYNLTVEAK**

Found in **P33151** in **con\_Xuniprot\_HUMAN3**, CADH5\_HUMAN Cadherin-5 OS=Homo sapiens GN=CDH5 PE=1 SV=5

Match to Query 7676: 1611.787828 from(806.901190,2+) intensity(363477.8438) rtinseconds(1973) scans(4973) index(8493)

Title: 111019\_Est\_ISCardio\_NMI\_YS\_G\_3Spectrum4297\_scans\_\_4973

Data file C:\\mascot\\20140703\_Tmgf\_1D\\CSV\_UseAnalysis\\MasterCSV\\All\_Glyco\\mgf\\ptm\\UC18ERLIC\_PTM\_35D.mgf

Click mouse within plot area to zoom in by factor of two about that point

Or, to Da

Label all possible matches Label matches used for scoring

Show Y-axis

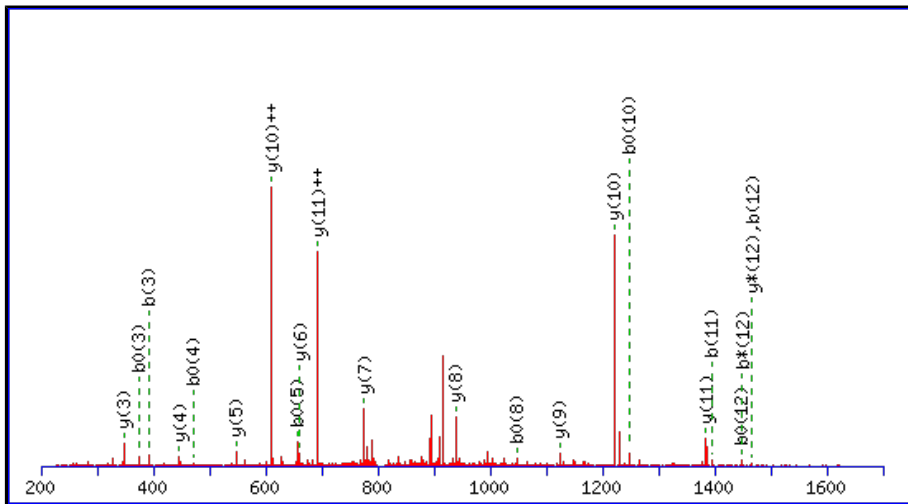

Monoisotopic mass of neutral peptide  $M_r(\text{calc})$ : 1611.7820

Fixed modifications: Carbamidomethyl (C) (apply to specified residues or termini only)

Variable modifications:

N7 : Deamidated (NQ)

Ions Score: 49 Expect: 0.0026

Matches : 22/128 fragment ions using 42 most intense peaks ([help](#))

| #  | b         | b <sup>++</sup> | b*        | b <sup>+++</sup> | b <sup>0</sup> | b <sup>0++</sup> | Seq. | y         | y <sup>++</sup> | y*        | y <sup>+++</sup> | y <sup>0</sup> | y <sup>0++</sup> | #  |
|----|-----------|-----------------|-----------|------------------|----------------|------------------|------|-----------|-----------------|-----------|------------------|----------------|------------------|----|
| 1  | 130.0499  | 65.5286         |           |                  | 112.0393       | 56.5233          | E    |           |                 |           |                  |                |                  | 13 |
| 2  | 229.1183  | 115.0628        |           |                  | 211.1077       | 106.0575         | V    | 1483.7468 | 742.3770        | 1466.7202 | 733.8637         | 1465.7362      | 733.3717         | 12 |
| 3  | 392.1816  | 196.5944        |           |                  | 374.1710       | 187.5892         | Y    | 1384.6783 | 692.8428        | 1367.6518 | 684.3295         | 1366.6678      | 683.8375         | 11 |
| 4  | 489.2344  | 245.1208        |           |                  | 471.2238       | 236.1155         | P    | 1221.6150 | 611.3111        | 1204.5885 | 602.7979         | 1203.6045      | 602.3059         | 10 |
| 5  | 675.3137  | 338.1605        |           |                  | 657.3031       | 329.1552         | W    | 1124.5623 | 562.7848        | 1107.5357 | 554.2715         | 1106.5517      | 553.7795         | 9  |
| 6  | 838.3770  | 419.6921        |           |                  | 820.3665       | 410.6869         | Y    | 938.4829  | 469.7451        | 921.4564  | 461.2318         | 920.4724       | 460.7398         | 8  |
| 7  | 953.4040  | 477.2056        | 936.3774  | 468.6923         | 935.3934       | 468.2003         | N    | 775.4196  | 388.2134        | 758.3931  | 379.7002         | 757.4090       | 379.2082         | 7  |
| 8  | 1066.4880 | 533.7477        | 1049.4615 | 525.2344         | 1048.4775      | 524.7424         | L    | 660.3927  | 330.7000        | 643.3661  | 322.1867         | 642.3821       | 321.6947         | 6  |
| 9  | 1167.5357 | 584.2715        | 1150.5092 | 575.7582         | 1149.5251      | 575.2662         | T    | 547.3086  | 274.1579        | 530.2821  | 265.6447         | 529.2980       | 265.1527         | 5  |
| 10 | 1266.6041 | 633.8057        | 1249.5776 | 625.2924         | 1248.5936      | 624.8004         | V    | 446.2609  | 223.6341        | 429.2344  | 215.1208         | 428.2504       | 214.6288         | 4  |
| 11 | 1395.6467 | 698.3270        | 1378.6202 | 689.8137         | 1377.6361      | 689.3217         | E    | 347.1925  | 174.0999        | 330.1660  | 165.5866         | 329.1819       | 165.0946         | 3  |
| 12 | 1466.6838 | 733.8456        | 1449.6573 | 725.3323         | 1448.6733      | 724.8403         | A    | 218.1499  | 109.5786        | 201.1234  | 101.0653         |                |                  | 2  |
| 13 |           |                 |           |                  |                |                  | K    | 147.1128  | 74.0600         | 130.0863  | 65.5468          |                |                  | 1  |

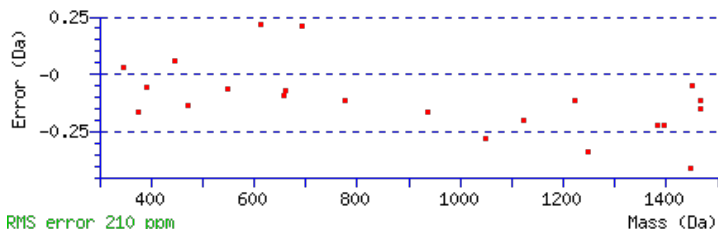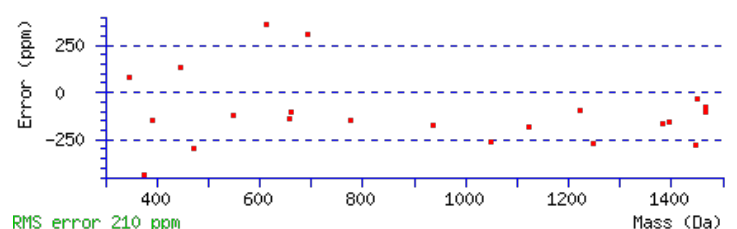

NCBI **BLAST** search of [EVYPWYNLTVEAK](#)

(Parameters: blastp, nr protein database, expect=20000, no filter, PAM30)

Other BLAST [web gateways](#)

**All matches to this query**

| Score | Mr(calc)  | Delta   | Sequence                       |
|-------|-----------|---------|--------------------------------|
| 49.1  | 1611.7820 | 0.0058  | <a href="#">EVYPWYNLTVEAK</a>  |
| 11.3  | 1611.7960 | -0.0082 | <a href="#">LNTMSKTSLGQSMK</a> |
| 6.3   | 1611.7926 | -0.0048 | <a href="#">DLYETCKARISQK</a>  |
| 6.2   | 1611.7814 | 0.0065  | <a href="#">GGLMNYQEKTVKNK</a> |
| 5.5   | 1611.7899 | -0.0021 | <a href="#">EVMHNRLNRGQNK</a>  |
| 3.0   | 1610.7900 | 0.9978  | <a href="#">VHAESLQQVVQSQR</a> |
| 2.9   | 1609.7803 | 2.0075  | <a href="#">LMEREQDMKLSAK</a>  |
| 2.8   | 1610.7835 | 1.0044  | <a href="#">LNHDQLAAVQAQMR</a> |
| 2.5   | 1610.7900 | 0.9978  | <a href="#">VHAESLQQVVQSQR</a> |
| 2.3   | 1611.7814 | 0.0064  | <a href="#">TDLKTFMGKAQNQK</a> |

**Mascot:** <http://www.matrixscience.com/>

# MASCOT SCIENCE Mascot Search Results

## Peptide View

MS/MS Fragmentation of **VYLQGLIDCYLFGNSSTVLEDSK**

Found in **P35542** in **con\_Xuniprot\_HUMAN3**, SAA4\_HUMAN Serum amyloid A-4 protein OS=Homo sapiens GN=SAA4 PE=1 SV=2

Match to Query 22346: 2623.267548 from(1312.641050,2+) intensity(26509.6289) rtinseconds(2803) scans(7353) index(14824)

Title: 111019\_Est\_MI\_YP\_G\_03Spectrum6422\_scans\_\_7353

Data file C:\mascot\20140703\_Tmgf\_1D\CSV\_UseAnalysis\MasterCSV\All\_Glyco\mgf\ptm\UC18ERLIC\_PTM\_35D.mgf

Click mouse within plot area to zoom in by factor of two about that point

Or, to Da

Label all possible matches Label matches used for scoring

Show Y-axis

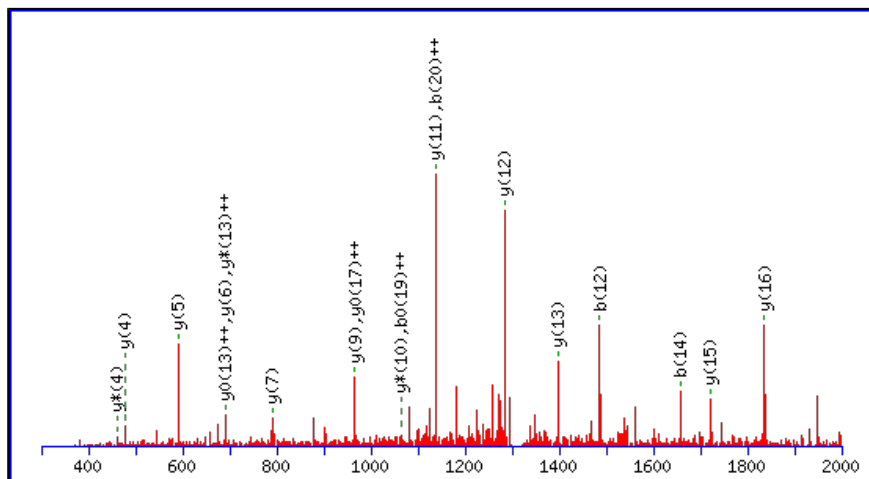

Monoisotopic mass of neutral peptide Mr(calc): 2621.2571

Fixed modifications: Carbamidomethyl (C) (apply to specified residues or termini only)

Variable modifications:

N14 : Deamidated (NQ)

Ions Score: 78 Expect: 4.4e-006

Matches : 19/242 fragment ions using 17 most intense peaks ([help](#))

| #  | b                | b <sup>++</sup>  | b*        | b <sup>*++</sup> | b <sup>0</sup> | b <sup>0++</sup> | Seq. | y                | y <sup>++</sup> | y*               | y <sup>*++</sup> | y <sup>0</sup> | y <sup>0++</sup> | #  |
|----|------------------|------------------|-----------|------------------|----------------|------------------|------|------------------|-----------------|------------------|------------------|----------------|------------------|----|
| 1  | 100.0757         | 50.5415          |           |                  |                |                  | V    |                  |                 |                  |                  |                |                  | 23 |
| 2  | 263.1390         | 132.0731         |           |                  |                |                  | Y    | 2523.1959        | 1262.1016       | 2506.1694        | 1253.5883        | 2505.1854      | 1253.0963        | 22 |
| 3  | 376.2231         | 188.6152         |           |                  |                |                  | L    | 2360.1326        | 1180.5699       | 2343.1061        | 1172.0567        | 2342.1221      | 1171.5647        | 21 |
| 4  | 504.2817         | 252.6445         | 487.2551  | 244.1312         |                |                  | Q    | 2247.0486        | 1124.0279       | 2230.0220        | 1115.5146        | 2229.0380      | 1115.0226        | 20 |
| 5  | 561.3031         | 281.1552         | 544.2766  | 272.6419         |                |                  | G    | 2118.9900        | 1059.9986       | 2101.9634        | 1051.4854        | 2100.9794      | 1050.9933        | 19 |
| 6  | 674.3872         | 337.6972         | 657.3606  | 329.1840         |                |                  | L    | 2061.9685        | 1031.4879       | 2044.9420        | 1022.9746        | 2043.9579      | 1022.4826        | 18 |
| 7  | 787.4713         | 394.2393         | 770.4447  | 385.7260         |                |                  | I    | 1948.8845        | 974.9459        | 1931.8579        | 966.4326         | 1930.8739      | 965.9406         | 17 |
| 8  | 902.4982         | 451.7527         | 885.4716  | 443.2395         | 884.4876       | 442.7475         | D    | <b>1835.8004</b> | 918.4038        | 1818.7738        | 909.8906         | 1817.7898      | 909.3985         | 16 |
| 9  | 1062.5288        | 531.7681         | 1045.5023 | 523.2548         | 1044.5183      | 522.7628         | C    | <b>1720.7734</b> | 860.8904        | 1703.7469        | 852.3771         | 1702.7629      | 851.8851         | 15 |
| 10 | 1225.5922        | 613.2997         | 1208.5656 | 604.7865         | 1207.5816      | 604.2944         | Y    | 1560.7428        | 780.8750        | 1543.7162        | 772.3618         | 1542.7322      | 771.8698         | 14 |
| 11 | 1338.6762        | 669.8418         | 1321.6497 | 661.3285         | 1320.6657      | 660.8365         | L    | <b>1397.6795</b> | 699.3434        | 1380.6529        | <b>690.8301</b>  | 1379.6689      | <b>690.3381</b>  | 13 |
| 12 | <b>1485.7447</b> | 743.3760         | 1468.7181 | 734.8627         | 1467.7341      | 734.3707         | F    | <b>1284.5954</b> | 642.8013        | 1267.5689        | 634.2881         | 1266.5848      | 633.7961         | 12 |
| 13 | 1542.7661        | 771.8867         | 1525.7396 | 763.3734         | 1524.7556      | 762.8814         | G    | <b>1137.5270</b> | 569.2671        | 1120.5004        | 560.7539         | 1119.5164      | 560.2618         | 11 |
| 14 | <b>1657.7931</b> | 829.4002         | 1640.7665 | 820.8869         | 1639.7825      | 820.3949         | N    | 1080.5055        | 540.7564        | <b>1063.4790</b> | 532.2431         | 1062.4950      | 531.7511         | 10 |
| 15 | 1744.8251        | 872.9162         | 1727.7985 | 864.4029         | 1726.8145      | 863.9109         | S    | <b>965.4786</b>  | 483.2429        | 948.4520         | 474.7297         | 947.4680       | 474.2376         | 9  |
| 16 | 1831.8571        | 916.4322         | 1814.8306 | 907.9189         | 1813.8466      | 907.4269         | S    | 878.4466         | 439.7269        | 861.4200         | 431.2136         | 860.4360       | 430.7216         | 8  |
| 17 | 1932.9048        | 966.9560         | 1915.8782 | 958.4428         | 1914.8942      | 957.9508         | T    | <b>791.4145</b>  | 396.2109        | 774.3880         | 387.6976         | 773.4040       | 387.2056         | 7  |
| 18 | 2031.9732        | 1016.4902        | 2014.9467 | 1007.9770        | 2013.9626      | 1007.4850        | V    | <b>690.3668</b>  | 345.6871        | 673.3403         | 337.1738         | 672.3563       | 336.6818         | 6  |
| 19 | 2145.0573        | 1073.0323        | 2128.0307 | 1064.5190        | 2127.0467      | 1064.0270        | L    | <b>591.2984</b>  | 296.1529        | 574.2719         | 287.6396         | 573.2879       | 287.1476         | 5  |
| 20 | 2274.0999        | <b>1137.5536</b> | 2257.0733 | 1129.0403        | 2256.0893      | 1128.5483        | E    | <b>478.2144</b>  | 239.6108        | <b>461.1878</b>  | 231.0975         | 460.2038       | 230.6055         | 4  |
| 21 | 2389.1268        | 1195.0670        | 2372.1003 | 1186.5538        | 2371.1162      | 1186.0618        | D    | 349.1718         | 175.0895        | 332.1452         | 166.5763         | 331.1612       | 166.0842         | 3  |
| 22 | 2476.1588        | 1238.5831        | 2459.1323 | 1230.0698        | 2458.1483      | 1229.5778        | S    | 234.1448         | 117.5761        | 217.1183         | 109.0628         | 216.1343       | 108.5708         | 2  |
| 23 |                  |                  |           |                  |                |                  | K    | 147.1128         | 74.0600         | 130.0863         | 65.5468          |                |                  | 1  |

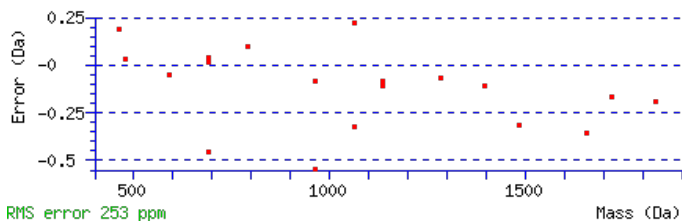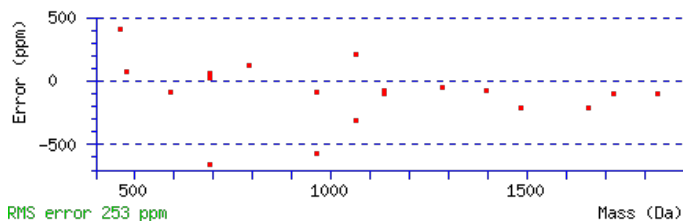

NCBI **BLAST** search of [VYLOGLIDCYLFGNSSTVLEDSK](#)  
 (Parameters: blastp, nr protein database, expect=20000, no filter, PAM30)  
 Other BLAST [web gateways](#)

**All matches to this query**

| Score | Mr(calc)  | Delta  | Sequence                                | Site Analysis          |
|-------|-----------|--------|-----------------------------------------|------------------------|
| 77.7  | 2621.2571 | 2.0105 | <a href="#">VYLOGLIDCYLFGNSSTVLEDSK</a> | Deamidated N14 100.00% |
| 23.3  | 2621.2571 | 2.0105 | <a href="#">VYLOGLIDCYLFGNSSTVLEDSK</a> | Deamidated Q4 0.00%    |
| 0.7   | 2621.2708 | 1.9968 | <a href="#">LEETNVTVQQQLVATQREFQEK</a>  |                        |
| 0.7   | 2621.2708 | 1.9968 | <a href="#">LEETNVTVQQQLVATQREFQEK</a>  |                        |
| 0.1   | 2623.2621 | 0.0054 | <a href="#">NKAIMESLSKGGNIMEQNFEPIR</a> |                        |
| 0.0   | 2621.2708 | 1.9968 | <a href="#">LEETNVTVQQQLVATQREFQEK</a>  |                        |
| 0.0   | 2621.2708 | 1.9968 | <a href="#">LEETNVTVQQQLVATQREFQEK</a>  |                        |
| 0.0   | 2621.2708 | 1.9968 | <a href="#">LEETNVTVQQQLVATQREFQEK</a>  |                        |
| 0.0   | 2621.2708 | 1.9968 | <a href="#">LEETNVTVQQQLVATQREFQEK</a>  |                        |
| 0.0   | 2621.2708 | 1.9968 | <a href="#">LEETNVTVQQQLVATQREFQEK</a>  |                        |

Mascot: <http://www.matrixscience.com/>



# MASCOT SCIENCE Mascot Search Results

## Peptide View

MS/MS Fragmentation of **FVQAICEGDDCQPPAYTYNNITCASPEVVGLDLR**

Found in **P35858** in **con\_Xuniprot\_HUMAN3**, ALS\_HUMAN Insulin-like growth factor-binding protein complex acid labile subunit OS=Homo sapiens GN=IGFALS PE=1 SV=1

Match to Query 28202: 3969.795912 from(1324.272580,3+) intensity(16562.0469) rtinseconds(2140) scans(5601) index(19813)

Title: 111019\_Est\_MI\_YP\_G\_09Spectrum4946\_scans\_5601

Data file C:\mascot\20140703\_Tmgf\_1D\CSV\_UseAnalysis\MasterCSV\All\_Glyco\mgf\ptm\UC18ERLIC\_PTM\_35D.mgf

Click mouse within plot area to zoom in by factor of two about that point

Or, to Da

Label all possible matches Label matches used for scoring

Show Y-axis

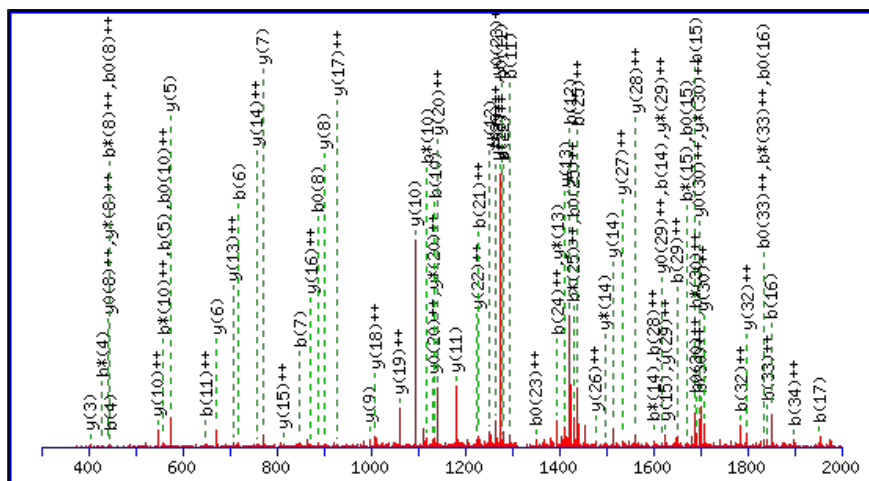

Monoisotopic mass of neutral peptide Mr(calc): 3969.7860

Fixed modifications: Carbamidomethyl (C) (apply to specified residues or termini only)

Variable modifications:

N20 : Deamidated (NQ)

Ions Score: 92 Expect: 1e-007

Matches : 82/388 fragment ions using 136 most intense peaks ([help](#))

| #  | b                | b <sup>++</sup>  | b <sup>*</sup>   | b <sup>***</sup> | b <sup>0</sup>   | b <sup>0++</sup> | Seq. | y                | y <sup>++</sup>  | y <sup>*</sup>   | y <sup>***</sup> | y <sup>0</sup> | y <sup>0++</sup> | #  |
|----|------------------|------------------|------------------|------------------|------------------|------------------|------|------------------|------------------|------------------|------------------|----------------|------------------|----|
| 1  | 148.0757         | 74.5415          |                  |                  |                  |                  | F    |                  |                  |                  |                  |                |                  | 35 |
| 2  | 247.1441         | 124.0757         |                  |                  |                  |                  | V    | 3823.7248        | 1912.3660        | 3806.6983        | 1903.8528        | 3805.7142      | 1903.3608        | 34 |
| 3  | 375.2027         | 188.1050         | 358.1761         | 179.5917         |                  |                  | Q    | 3724.6564        | 1862.8318        | 3707.6298        | 1854.3186        | 3706.6458      | 1853.8266        | 33 |
| 4  | <b>446.2398</b>  | 223.6235         | <b>429.2132</b>  | 215.1103         |                  |                  | A    | 3596.5978        | <b>1798.8025</b> | 3579.5713        | 1790.2893        | 3578.5873      | 1789.7973        | 32 |
| 5  | <b>559.3239</b>  | 280.1656         | 542.2973         | 271.6523         |                  |                  | I    | 3525.5607        | 1763.2840        | 3508.5342        | 1754.7707        | 3507.5501      | 1754.2787        | 31 |
| 6  | <b>719.3545</b>  | 360.1809         | 702.3280         | 351.6676         |                  |                  | C    | 3412.4766        | <b>1706.7420</b> | 3395.4501        | <b>1698.2287</b> | 3394.4661      | <b>1697.7367</b> | 30 |
| 7  | <b>848.3971</b>  | 424.7022         | 831.3706         | 416.1889         | 830.3865         | 415.6969         | E    | 3252.4460        | <b>1626.7266</b> | 3235.4194        | <b>1618.2134</b> | 3234.4354      | <b>1617.7213</b> | 29 |
| 8  | 905.4186         | 453.2129         | 888.3920         | <b>444.6996</b>  | <b>887.4080</b>  | <b>444.2076</b>  | G    | 3123.4034        | <b>1562.2053</b> | 3106.3768        | 1553.6921        | 3105.3928      | 1553.2001        | 28 |
| 9  | 1020.4455        | 510.7264         | 1003.4190        | 502.2131         | 1002.4349        | 501.7211         | D    | 3066.3819        | <b>1533.6946</b> | 3049.3554        | 1525.1813        | 3048.3714      | 1524.6893        | 27 |
| 10 | <b>1135.4725</b> | 568.2399         | <b>1118.4459</b> | <b>559.7266</b>  | 1117.4619        | <b>559.2346</b>  | D    | 2951.3550        | <b>1476.1811</b> | 2934.3284        | 1467.6679        | 2933.3444      | 1467.1758        | 26 |
| 11 | <b>1295.5031</b> | <b>648.2552</b>  | 1278.4766        | 639.7419         | <b>1277.4925</b> | 639.2499         | C    | 2836.3280        | 1418.6677        | 2819.3015        | 1410.1544        | 2818.3175      | 1409.6624        | 25 |
| 12 | <b>1423.5617</b> | 712.2845         | 1406.5351        | 703.7712         | 1405.5511        | 703.2792         | Q    | 2676.2974        | 1338.6523        | 2659.2708        | 1330.1391        | 2658.2868      | 1329.6471        | 24 |
| 13 | 1520.6144        | 760.8109         | 1503.5879        | 752.2976         | 1502.6039        | 751.8056         | P    | 2548.2388        | <b>1274.6230</b> | 2531.2123        | <b>1266.1098</b> | 2530.2283      | <b>1265.6178</b> | 23 |
| 14 | <b>1617.6672</b> | 809.3372         | <b>1600.6407</b> | 800.8240         | 1599.6566        | 800.3320         | P    | 2451.1861        | <b>1226.0967</b> | 2434.1595        | 1217.5834        | 2433.1755      | 1217.0914        | 22 |
| 15 | <b>1688.7043</b> | 844.8558         | <b>1671.6778</b> | 836.3425         | <b>1670.6938</b> | 835.8505         | A    | 2354.1333        | 1177.5703        | 2337.1067        | 1169.0570        | 2336.1227      | 1168.5650        | 21 |
| 16 | <b>1851.7677</b> | 926.3875         | 1834.7411        | 917.8742         | <b>1833.7571</b> | 917.3822         | Y    | 2283.0962        | <b>1142.0517</b> | 2266.0696        | <b>1133.5385</b> | 2265.0856      | <b>1133.0464</b> | 20 |
| 17 | <b>1952.8153</b> | 976.9113         | 1935.7888        | 968.3980         | 1934.8048        | 967.9060         | T    | 2120.0328        | <b>1060.5201</b> | 2103.0063        | 1052.0068        | 2102.0223      | 1051.5148        | 19 |
| 18 | 2115.8787        | 1058.4430        | 2098.8521        | 1049.9297        | 2097.8681        | 1049.4377        | Y    | 2018.9852        | <b>1009.9962</b> | 2001.9586        | 1001.4829        | 2000.9746      | 1000.9909        | 18 |
| 19 | 2229.9216        | 1115.4644        | 2212.8950        | 1106.9512        | 2211.9110        | 1106.4591        | N    | 1855.9218        | <b>928.4646</b>  | 1838.8953        | 919.9513         | 1837.9113      | 919.4593         | 17 |
| 20 | 2344.9485        | 1172.9779        | 2327.9220        | 1164.4646        | 2326.9380        | 1163.9726        | N    | 1741.8789        | <b>871.4431</b>  | 1724.8524        | 862.9298         | 1723.8683      | 862.4378         | 16 |
| 21 | 2458.0326        | <b>1229.5199</b> | 2441.0060        | 1221.0067        | 2440.0220        | 1220.5147        | I    | <b>1626.8520</b> | <b>813.9296</b>  | 1609.8254        | 805.4163         | 1608.8414      | 804.9243         | 15 |
| 22 | 2559.0803        | <b>1280.0438</b> | 2542.0537        | 1271.5305        | 2541.0697        | 1271.0385        | T    | <b>1513.7679</b> | <b>757.3876</b>  | <b>1496.7414</b> | 748.8743         | 1495.7573      | 748.3823         | 14 |

|    |           |           |           |           |           |           |   |           |          |           |          |           |          |    |
|----|-----------|-----------|-----------|-----------|-----------|-----------|---|-----------|----------|-----------|----------|-----------|----------|----|
| 23 | 2719.1109 | 1360.0591 | 2702.0844 | 1351.5458 | 2701.1004 | 1351.0538 | C | 1412.7202 | 706.8638 | 1395.6937 | 698.3505 | 1394.7097 | 697.8585 | 13 |
| 24 | 2790.1480 | 1395.5777 | 2773.1215 | 1387.0644 | 2772.1375 | 1386.5724 | A | 1252.6896 | 626.8484 | 1235.6630 | 618.3352 | 1234.6790 | 617.8431 | 12 |
| 25 | 2877.1801 | 1439.0937 | 2860.1535 | 1430.5804 | 2859.1695 | 1430.0884 | S | 1181.6525 | 591.3299 | 1164.6259 | 582.8166 | 1163.6419 | 582.3246 | 11 |
| 26 | 2974.2328 | 1487.6201 | 2957.2063 | 1479.1068 | 2956.2223 | 1478.6148 | P | 1094.6204 | 547.8139 | 1077.5939 | 539.3006 | 1076.6099 | 538.8086 | 10 |
| 27 | 3071.2856 | 1536.1464 | 3054.2590 | 1527.6332 | 3053.2750 | 1527.1412 | P | 997.5677  | 499.2875 | 980.5411  | 490.7742 | 979.5571  | 490.2822 | 9  |
| 28 | 3200.3282 | 1600.6677 | 3183.3016 | 1592.1545 | 3182.3176 | 1591.6624 | E | 900.5149  | 450.7611 | 883.4884  | 442.2478 | 882.5043  | 441.7558 | 8  |
| 29 | 3299.3966 | 1650.2019 | 3282.3700 | 1641.6887 | 3281.3860 | 1641.1967 | V | 771.4723  | 386.2398 | 754.4458  | 377.7265 | 753.4617  | 377.2345 | 7  |
| 30 | 3398.4650 | 1699.7361 | 3381.4385 | 1691.2229 | 3380.4544 | 1690.7309 | V | 672.4039  | 336.7056 | 655.3774  | 328.1923 | 654.3933  | 327.7003 | 6  |
| 31 | 3455.4865 | 1728.2469 | 3438.4599 | 1719.7336 | 3437.4759 | 1719.2416 | G | 573.3355  | 287.1714 | 556.3089  | 278.6581 | 555.3249  | 278.1661 | 5  |
| 32 | 3568.5705 | 1784.7889 | 3551.5440 | 1776.2756 | 3550.5600 | 1775.7836 | L | 516.3140  | 258.6606 | 499.2875  | 250.1474 | 498.3035  | 249.6554 | 4  |
| 33 | 3683.5975 | 1842.3024 | 3666.5709 | 1833.7891 | 3665.5869 | 1833.2971 | D | 403.2300  | 202.1186 | 386.2034  | 193.6053 | 385.2194  | 193.1133 | 3  |
| 34 | 3796.6815 | 1898.8444 | 3779.6550 | 1890.3311 | 3778.6710 | 1889.8391 | L | 288.2030  | 144.6051 | 271.1765  | 136.0919 |           |          | 2  |
| 35 |           |           |           |           |           |           | R | 175.1190  | 88.0631  | 158.0924  | 79.5498  |           |          | 1  |

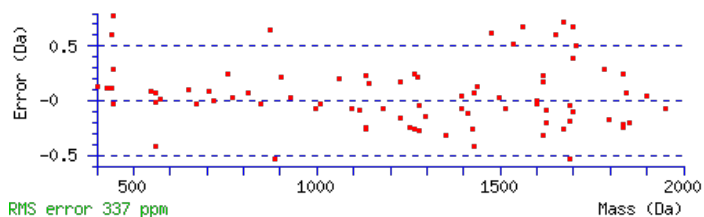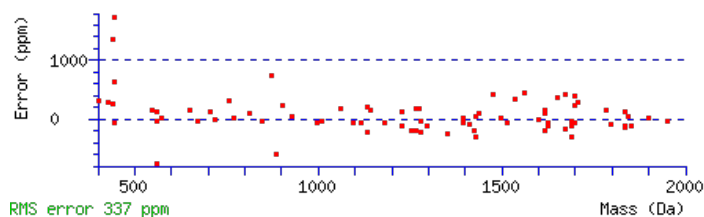

NCBI BLAST search of [FVQAICEGDDCQPPAYTYNNITCASPPEVVGLDLR](#)

(Parameters: blastp, nr protein database, expect=20000, no filter, PAM30)

Other BLAST [web gateways](#)

All matches to this query

| Score | Mr(calc)  | Delta   | Sequence                                            | Site Analysis         |
|-------|-----------|---------|-----------------------------------------------------|-----------------------|
| 91.6  | 3969.7860 | 0.0100  | <a href="#">FVQAICEGDDCQPPAYTYNNITCASPPEVVGLDLR</a> | Deamidated N20 78.37% |
| 84.5  | 3969.7860 | 0.0100  | <a href="#">FVQAICEGDDCQPPAYTYNNITCASPPEVVGLDLR</a> | Deamidated N19 15.39% |
| 80.6  | 3969.7860 | 0.0100  | <a href="#">FVQAICEGDDCQPPAYTYNNITCASPPEVVGLDLR</a> | Deamidated Q12 6.24%  |
| 66.0  | 3968.8019 | 0.9940  | <a href="#">FVQAICEGDDCQPPAYTYNNITCASPPEVVGLDLR</a> |                       |
| 49.9  | 3969.7860 | 0.0100  | <a href="#">FVQAICEGDDCQPPAYTYNNITCASPPEVVGLDLR</a> | Deamidated Q3 0.01%   |
| 8.6   | 3968.7833 | 1.0126  | <a href="#">EPDKFTSSSQVFQQRSGMYNPEAPFNDTQIISMR</a>  |                       |
| 6.5   | 3968.7833 | 1.0126  | <a href="#">EPDKFTSSSQVFQQRSGMYNPEAPFNDTQIISMR</a>  |                       |
| 3.5   | 3969.7989 | -0.0030 | <a href="#">LMGSLTNFDNNESSDAELNYTLPKESDPQTYTLNK</a> |                       |
| 2.7   | 3967.8046 | 1.9913  | <a href="#">ASSVFWQQMEFVDSLHGQPKMPEWLSHPSHGNR</a>   |                       |
| 2.7   | 3967.8046 | 1.9913  | <a href="#">ASSVFWQQMEFVDSLHGQPKMPEWLSHPSHGNR</a>   |                       |

Mascot: <http://www.matrixscience.com/>

# MATRIX SCIENCE Mascot Search Results

## Peptide View

MS/MS Fragmentation of **FVQAICEGDDCQPPAYTYNNITCASPEVVGLDLR**

Found in **P35858** in **con\_Xuniprot\_HUMAN3**, ALS\_HUMAN Insulin-like growth factor-binding protein complex acid labile subunit OS=Homo sapiens GN=IGFALS PE=1 SV=1

Match to Query 28204: 3970.782432 from(1324.601420,3+) intensity(20419.4355) rtinseconds(2162) scans(5447) index(12813)

Title: 111019\_Est\_ISCardio\_NMI\_YS\_G\_9Spectrum4775\_scans\_5447

Data file C:\mascot\20140703\_Tmgf\_1D\CSV\_UseAnalysis\MasterCSV\All\_Glyco\mgf\ptm\UC18ERLIC\_PTM\_35D.mgf

Click mouse within plot area to zoom in by factor of two about that point

Or, to Da

Label all possible matches Label matches used for scoring

Show Y-axis

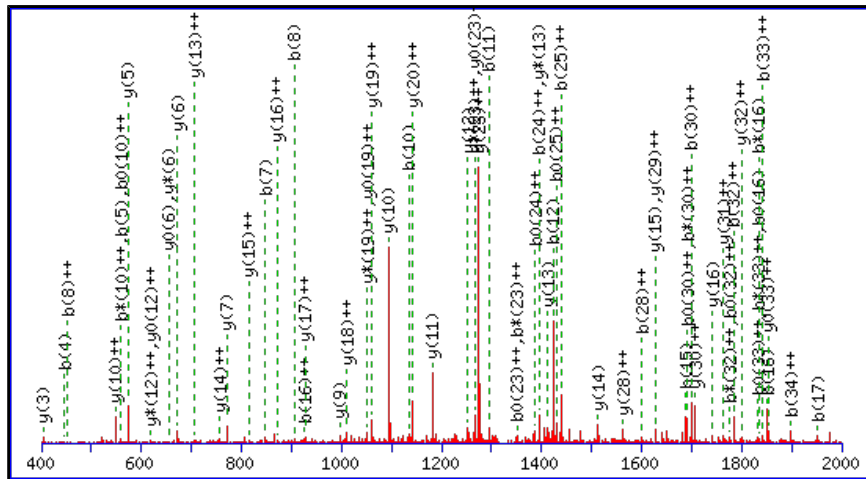

Monoisotopic mass of neutral peptide Mr(calc): 3970.7700

Fixed modifications: Carbamidomethyl (C) (apply to specified residues or termini only)

Variable modifications:

N19 : Deamidated (NQ)

N20 : Deamidated (NQ)

Ions Score: 84 Expect: 5.6e-007

Matches : 70/388 fragment ions using 112 most intense peaks ([help](#))

| #  | b         | b <sup>++</sup> | b*        | b <sup>***</sup> | b <sup>0</sup> | b <sup>0++</sup> | Seq. | y         | y <sup>++</sup> | y*        | y <sup>***</sup> | y <sup>0</sup> | y <sup>0++</sup> | #  |
|----|-----------|-----------------|-----------|------------------|----------------|------------------|------|-----------|-----------------|-----------|------------------|----------------|------------------|----|
| 1  | 148.0757  | 74.5415         |           |                  |                |                  | F    |           |                 |           |                  |                |                  | 35 |
| 2  | 247.1441  | 124.0757        |           |                  |                |                  | V    | 3824.7088 | 1912.8580       | 3807.6823 | 1904.3448        | 3806.6983      | 1903.8528        | 34 |
| 3  | 375.2027  | 188.1050        | 358.1761  | 179.5917         |                |                  | Q    | 3725.6404 | 1863.3238       | 3708.6139 | 1854.8106        | 3707.6298      | 1854.3186        | 33 |
| 4  | 446.2398  | 223.6235        | 429.2132  | 215.1103         |                |                  | A    | 3597.5818 | 1799.2946       | 3580.5553 | 1790.7813        | 3579.5713      | 1790.2893        | 32 |
| 5  | 559.3239  | 280.1656        | 542.2973  | 271.6523         |                |                  | I    | 3526.5447 | 1763.7760       | 3509.5182 | 1755.2627        | 3508.5342      | 1754.7707        | 31 |
| 6  | 719.3545  | 360.1809        | 702.3280  | 351.6676         |                |                  | C    | 3413.4607 | 1707.2340       | 3396.4341 | 1698.7207        | 3395.4501      | 1698.2287        | 30 |
| 7  | 848.3971  | 424.7022        | 831.3706  | 416.1889         | 830.3865       | 415.6969         | E    | 3253.4300 | 1627.2186       | 3236.4035 | 1618.7054        | 3235.4194      | 1618.2134        | 29 |
| 8  | 905.4186  | 453.2129        | 888.3920  | 444.6996         | 887.4080       | 444.2076         | G    | 3124.3874 | 1562.6973       | 3107.3609 | 1554.1841        | 3106.3768      | 1553.6921        | 28 |
| 9  | 1020.4455 | 510.7264        | 1003.4190 | 502.2131         | 1002.4349      | 501.7211         | D    | 3067.3659 | 1534.1866       | 3050.3394 | 1525.6733        | 3049.3554      | 1525.1813        | 27 |
| 10 | 1135.4725 | 568.2399        | 1118.4459 | 559.7266         | 1117.4619      | 559.2346         | D    | 2952.3390 | 1476.6731       | 2935.3125 | 1468.1599        | 2934.3284      | 1467.6679        | 26 |
| 11 | 1295.5031 | 648.2552        | 1278.4766 | 639.7419         | 1277.4925      | 639.2499         | C    | 2837.3121 | 1419.1597       | 2820.2855 | 1410.6464        | 2819.3015      | 1410.1544        | 25 |
| 12 | 1423.5617 | 712.2845        | 1406.5351 | 703.7712         | 1405.5511      | 703.2792         | Q    | 2677.2814 | 1339.1443       | 2660.2549 | 1330.6311        | 2659.2708      | 1330.1391        | 24 |
| 13 | 1520.6144 | 760.8109        | 1503.5879 | 752.2976         | 1502.6039      | 751.8056         | P    | 2549.2228 | 1275.1151       | 2532.1963 | 1266.6018        | 2531.2123      | 1266.1098        | 23 |
| 14 | 1617.6672 | 809.3372        | 1600.6407 | 800.8240         | 1599.6566      | 800.3320         | P    | 2452.1701 | 1226.5887       | 2435.1435 | 1218.0754        | 2434.1595      | 1217.5834        | 22 |
| 15 | 1688.7043 | 844.8558        | 1671.6778 | 836.3425         | 1670.6938      | 835.8505         | A    | 2355.1173 | 1178.0623       | 2338.0908 | 1169.5490        | 2337.1067      | 1169.0570        | 21 |
| 16 | 1851.7677 | 926.3875        | 1834.7411 | 917.8742         | 1833.7571      | 917.3822         | Y    | 2284.0802 | 1142.5437       | 2267.0536 | 1134.0305        | 2266.0696      | 1133.5385        | 20 |
| 17 | 1952.8153 | 976.9113        | 1935.7888 | 968.3980         | 1934.8048      | 967.9060         | T    | 2121.0169 | 1061.0121       | 2103.9903 | 1052.4988        | 2103.0063      | 1052.0068        | 19 |
| 18 | 2115.8787 | 1058.4430       | 2098.8521 | 1049.9297        | 2097.8681      | 1049.4377        | Y    | 2019.9692 | 1010.4882       | 2002.9426 | 1001.9750        | 2001.9586      | 1001.4829        | 18 |
| 19 | 2230.9056 | 1115.9564       | 2213.8791 | 1107.4432        | 2212.8950      | 1106.9512        | N    | 1856.9059 | 928.9566        | 1839.8793 | 920.4433         | 1838.8953      | 919.9513         | 17 |
| 20 | 2345.9325 | 1173.4699       | 2328.9060 | 1164.9566        | 2327.9220      | 1164.4646        | N    | 1741.8789 | 871.4431        | 1724.8524 | 862.9298         | 1723.8683      | 862.4378         | 16 |
| 21 | 2459.0166 | 1230.0119       | 2441.9901 | 1221.4987        | 2441.0060      | 1221.0067        | I    | 1626.8520 | 813.9296        | 1609.8254 | 805.4163         | 1608.8414      | 804.9243         | 15 |

|    |           |           |           |           |           |           |   |           |          |           |          |           |          |    |
|----|-----------|-----------|-----------|-----------|-----------|-----------|---|-----------|----------|-----------|----------|-----------|----------|----|
| 22 | 2560.0643 | 1280.5358 | 2543.0377 | 1272.0225 | 2542.0537 | 1271.5305 | T | 1513.7679 | 757.3876 | 1496.7414 | 748.8743 | 1495.7573 | 748.3823 | 14 |
| 23 | 2720.0949 | 1360.5511 | 2703.0684 | 1352.0378 | 2702.0844 | 1351.5458 | C | 1412.7202 | 706.8638 | 1395.6937 | 698.3505 | 1394.7097 | 697.8585 | 13 |
| 24 | 2791.1320 | 1396.0697 | 2774.1055 | 1387.5564 | 2773.1215 | 1387.0644 | A | 1252.6896 | 626.8484 | 1235.6630 | 618.3352 | 1234.6790 | 617.8431 | 12 |
| 25 | 2878.1641 | 1439.5857 | 2861.1375 | 1431.0724 | 2860.1535 | 1430.5804 | S | 1181.6525 | 591.3299 | 1164.6259 | 582.8166 | 1163.6419 | 582.3246 | 11 |
| 26 | 2975.2168 | 1488.1121 | 2958.1903 | 1479.5988 | 2957.2063 | 1479.1068 | P | 1094.6204 | 547.8139 | 1077.5939 | 539.3006 | 1076.6099 | 538.8086 | 10 |
| 27 | 3072.2696 | 1536.6384 | 3055.2431 | 1528.1252 | 3054.2590 | 1527.6332 | P | 997.5677  | 499.2875 | 980.5411  | 490.7742 | 979.5571  | 490.2822 | 9  |
| 28 | 3201.3122 | 1601.1597 | 3184.2856 | 1592.6465 | 3183.3016 | 1592.1545 | E | 900.5149  | 450.7611 | 883.4884  | 442.2478 | 882.5043  | 441.7558 | 8  |
| 29 | 3300.3806 | 1650.6939 | 3283.3541 | 1642.1807 | 3282.3700 | 1641.6887 | V | 771.4723  | 386.2398 | 754.4458  | 377.7265 | 753.4617  | 377.2345 | 7  |
| 30 | 3399.4490 | 1700.2282 | 3382.4225 | 1691.7149 | 3381.4385 | 1691.2229 | V | 672.4039  | 336.7056 | 655.3774  | 328.1923 | 654.3933  | 327.7003 | 6  |
| 31 | 3456.4705 | 1728.7389 | 3439.4439 | 1720.2256 | 3438.4599 | 1719.7336 | G | 573.3355  | 287.1714 | 556.3089  | 278.6581 | 555.3249  | 278.1661 | 5  |
| 32 | 3569.5546 | 1785.2809 | 3552.5280 | 1776.7676 | 3551.5440 | 1776.2756 | L | 516.3140  | 258.6606 | 499.2875  | 250.1474 | 498.3035  | 249.6554 | 4  |
| 33 | 3684.5815 | 1842.7944 | 3667.5549 | 1834.2811 | 3666.5709 | 1833.7891 | D | 403.2300  | 202.1186 | 386.2034  | 193.6053 | 385.2194  | 193.1133 | 3  |
| 34 | 3797.6656 | 1899.3364 | 3780.6390 | 1890.8231 | 3779.6550 | 1890.3311 | L | 288.2030  | 144.6051 | 271.1765  | 136.0919 |           |          | 2  |
| 35 |           |           |           |           |           |           | R | 175.1190  | 88.0631  | 158.0924  | 79.5498  |           |          | 1  |

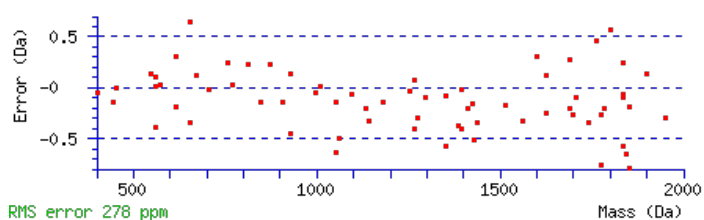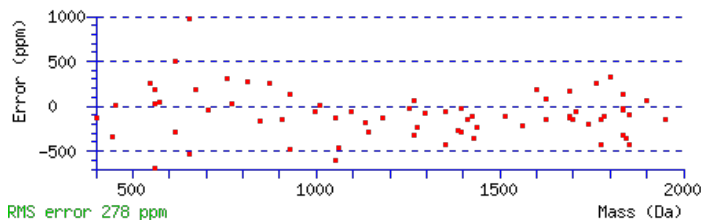

NCBI BLAST search of [FVQAICEGDDCQPPAYTYNNITCASPPEVVGLDLR](#)

(Parameters: blastp, nr protein database, expect=20000, no filter, PAM30)

Other BLAST [web gateways](#)

All matches to this query

| Score | Mr(calc)  | Delta  | Sequence                                            | Site Analysis              |
|-------|-----------|--------|-----------------------------------------------------|----------------------------|
| 83.7  | 3970.7700 | 0.0125 | <a href="#">FVQAICEGDDCQPPAYTYNNITCASPPEVVGLDLR</a> | Deamidated N19, N20 52.76% |
| 80.1  | 3970.7700 | 0.0125 | <a href="#">FVQAICEGDDCQPPAYTYNNITCASPPEVVGLDLR</a> | Deamidated Q12, N20 23.03% |
| 80.1  | 3970.7700 | 0.0125 | <a href="#">FVQAICEGDDCQPPAYTYNNITCASPPEVVGLDLR</a> | Deamidated Q12, N19 23.03% |
| 71.0  | 3969.7860 | 0.9965 | <a href="#">FVQAICEGDDCQPPAYTYNNITCASPPEVVGLDLR</a> |                            |
| 70.2  | 3969.7860 | 0.9965 | <a href="#">FVQAICEGDDCQPPAYTYNNITCASPPEVVGLDLR</a> |                            |
| 66.0  | 3969.7860 | 0.9965 | <a href="#">FVQAICEGDDCQPPAYTYNNITCASPPEVVGLDLR</a> |                            |
| 64.1  | 3970.7700 | 0.0125 | <a href="#">FVQAICEGDDCQPPAYTYNNITCASPPEVVGLDLR</a> | Deamidated Q3, N20 0.58%   |
| 64.1  | 3970.7700 | 0.0125 | <a href="#">FVQAICEGDDCQPPAYTYNNITCASPPEVVGLDLR</a> | Deamidated Q3, N19 0.58%   |
| 48.4  | 3969.7860 | 0.9965 | <a href="#">FVQAICEGDDCQPPAYTYNNITCASPPEVVGLDLR</a> |                            |
| 47.9  | 3970.7700 | 0.0125 | <a href="#">FVQAICEGDDCQPPAYTYNNITCASPPEVVGLDLR</a> | Deamidated Q3, Q12 0.01%   |

Mascot: <http://www.matrixscience.com/>

# MATRIX SCIENCE Mascot Search Results

## Peptide View

MS/MS Fragmentation of **YAEDKFNETTEK**

Found in **P43652** in **con\_Xuniprot\_HUMAN3**, AFAM\_HUMAN Afamin OS=Homo sapiens GN=AFM PE=1 SV=1

Match to Query 6653: 1474.650668 from(738.332610,2+) intensity(38833.9063) rtinseconds(332) scans(586) index(25157)

Title: 111019\_Est\_MI\_YS\_G\_07Spectrum454\_scans\_\_586

Data file C:\\mascot\\20140703\_Tmgf\_1D\\CSV\_UseAnalysis\\MasterCSV\\All\_Glyco\\mgf\\ptm\\UC18ERLIC\_PTM\_35D.mgf

Click mouse within plot area to zoom in by factor of two about that point

Or, to Da

Label all possible matches Label matches used for scoring

Show Y-axis

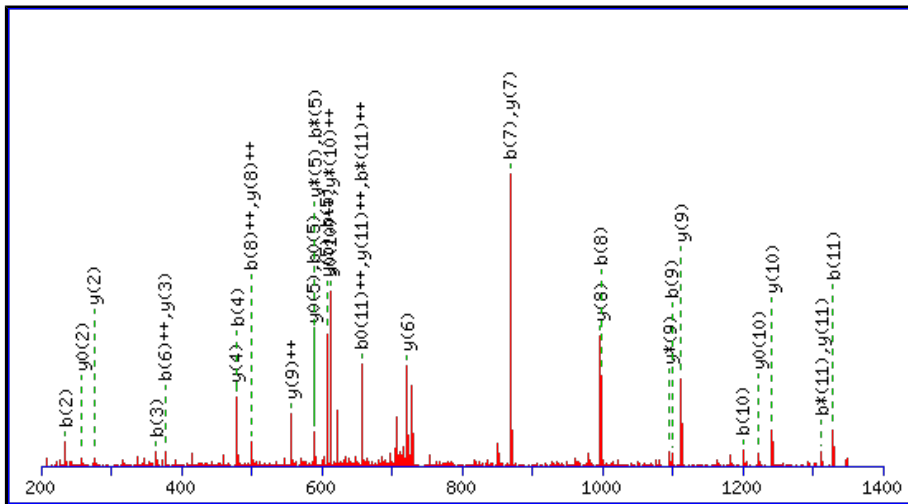

Monoisotopic mass of neutral peptide Mr(calc): 1474.6463

Fixed modifications: Carbamidomethyl (C) (apply to specified residues or termini only)

Variable modifications:

N7 : Deamidated (NQ)

Ions Score: 88 Expect: 1.3e-007

Matches : 36/118 fragment ions using 36 most intense peaks ([help](#))

| #  | b                | b <sup>++</sup> | b*               | b <sup>+++</sup> | b <sup>0</sup>  | b <sup>0++</sup> | Seq. | y                | y <sup>++</sup> | y*               | y <sup>+++</sup> | y <sup>0</sup>   | y <sup>0++</sup> | #  |
|----|------------------|-----------------|------------------|------------------|-----------------|------------------|------|------------------|-----------------|------------------|------------------|------------------|------------------|----|
| 1  | 164.0706         | 82.5389         |                  |                  |                 |                  | Y    |                  |                 |                  |                  |                  |                  | 12 |
| 2  | <b>235.1077</b>  | 118.0575        |                  |                  |                 |                  | A    | <b>1312.5903</b> | <b>656.7988</b> | 1295.5638        | 648.2855         | 1294.5798        | 647.7935         | 11 |
| 3  | <b>364.1503</b>  | 182.5788        |                  |                  | 346.1397        | 173.5735         | E    | <b>1241.5532</b> | 621.2802        | 1224.5267        | <b>612.7670</b>  | <b>1223.5426</b> | <b>612.2750</b>  | 10 |
| 4  | <b>479.1773</b>  | 240.0923        |                  |                  | 461.1667        | 231.0870         | D    | <b>1112.5106</b> | <b>556.7589</b> | <b>1095.4841</b> | 548.2457         | 1094.5000        | 547.7537         | 9  |
| 5  | <b>607.2722</b>  | 304.1397        | <b>590.2457</b>  | 295.6265         | <b>589.2617</b> | 295.1345         | K    | <b>997.4837</b>  | <b>499.2455</b> | 980.4571         | 490.7322         | 979.4731         | 490.2402         | 8  |
| 6  | 754.3406         | <b>377.6740</b> | 737.3141         | 369.1607         | 736.3301        | 368.6687         | F    | <b>869.3887</b>  | 435.1980        | 852.3622         | 426.6847         | 851.3781         | 426.1927         | 7  |
| 7  | <b>869.3676</b>  | 435.1874        | 852.3410         | 426.6742         | 851.3570        | 426.1821         | N    | <b>722.3203</b>  | 361.6638        | 705.2937         | 353.1505         | 704.3097         | 352.6585         | 6  |
| 8  | <b>998.4102</b>  | <b>499.7087</b> | 981.3836         | 491.1954         | 980.3996        | 490.7034         | E    | <b>607.2933</b>  | 304.1503        | <b>590.2668</b>  | 295.6370         | <b>589.2828</b>  | 295.1450         | 5  |
| 9  | <b>1099.4578</b> | 550.2326        | 1082.4313        | 541.7193         | 1081.4473       | 541.2273         | T    | <b>478.2508</b>  | 239.6290        | 461.2242         | 231.1157         | 460.2402         | 230.6237         | 4  |
| 10 | <b>1200.5055</b> | 600.7564        | 1183.4790        | 592.2431         | 1182.4950       | 591.7511         | T    | <b>377.2031</b>  | 189.1052        | 360.1765         | 180.5919         | 359.1925         | 180.0999         | 3  |
| 11 | <b>1329.5481</b> | 665.2777        | <b>1312.5216</b> | <b>656.7644</b>  | 1311.5376       | <b>656.2724</b>  | E    | <b>276.1554</b>  | 138.5813        | 259.1288         | 130.0681         | <b>258.1448</b>  | 129.5761         | 2  |
| 12 |                  |                 |                  |                  |                 |                  | K    | 147.1128         | 74.0600         | 130.0863         | 65.5468          |                  |                  | 1  |

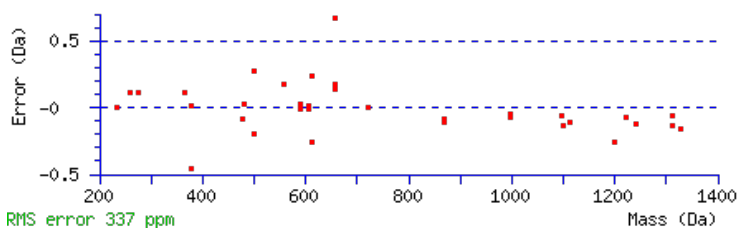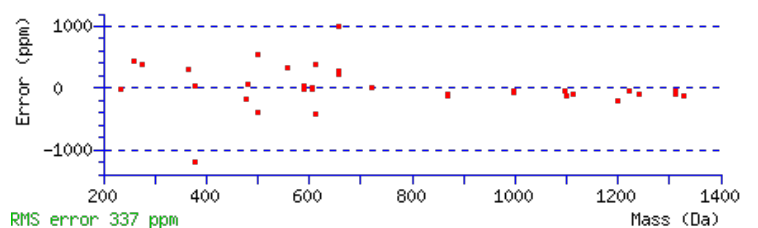

NCBI BLAST search of [YAEDKFNETTEK](#)

(Parameters: blastp, nr protein database, expect=20000, no filter, PAM30)

Other BLAST [web gateways](#)

**All matches to this query**

| Score | Mr(calc)  | Delta   | Sequence                        |
|-------|-----------|---------|---------------------------------|
| 87.8  | 1474.6463 | 0.0043  | <a href="#">YAEDKFNETTEK</a>    |
| 8.5   | 1472.6379 | 2.0128  | <a href="#">SGESNTHQDIEEK</a>   |
| 4.4   | 1474.6511 | -0.0004 | <a href="#">MGGSFERGAFSNSEK</a> |
| 4.0   | 1474.6544 | -0.0037 | <a href="#">MQSNYGKQMKAR</a>    |
| 4.0   | 1473.6526 | 0.9980  | <a href="#">SMMSRACWAKSK</a>    |
| 3.9   | 1474.6497 | 0.0010  | <a href="#">VNATPQQMPQTEK</a>   |
| 3.3   | 1474.6544 | -0.0037 | <a href="#">MQSNYGKQMKAR</a>    |
| 3.2   | 1474.6576 | -0.0069 | <a href="#">TONKEESYDESK</a>    |
| 2.5   | 1474.6544 | -0.0037 | <a href="#">MQSNYGKQMKAR</a>    |
| 1.4   | 1474.6470 | 0.0036  | <a href="#">QQDQSAGPAMETR</a>   |

Mascot: <http://www.matrixscience.com/>



# MASCOT SCIENCE Mascot Search Results

## Peptide View

MS/MS Fragmentation of **DIENFNSTQK**

Found in **P43652** in **con\_Xuniprot\_HUMAN3**, AFAM\_HUMAN Afamin OS=Homo sapiens GN=AFM PE=1 SV=1

Match to Query 1640: 1195.537608 from(598.776080,2+) intensity(6700.7188) rtinseconds(513) scans(957) index(7320)

Title: 111019\_Est\_ISCardio\_NMI\_YP\_G\_11Spectrum792\_scans\_\_957

Data file C:\\mascot\\20140703\_Tmfg\_1D\\CSV\_UseAnalysis\\MasterCSV\\All\_Glyco\\mgf\\ptm\\UC18ERLIC\_PTM\_35D.mgf

Click mouse within plot area to zoom in by factor of two about that point

Or, to Da

Label all possible matches Label matches used for scoring

Show Y-axis

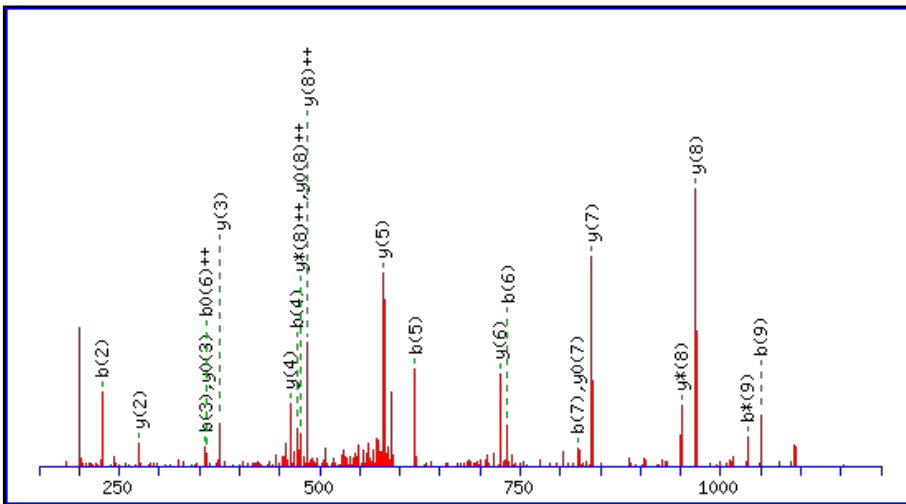

Monoisotopic mass of neutral peptide Mr(calc): 1195.5357

Fixed modifications: Carbamidomethyl (C) (apply to specified residues or termini only)

Variable modifications:

N6 : Deamidated (NQ)

Ions Score: 57 Expect: 0.00019

Matches : 22/98 fragment ions using 30 most intense peaks ([help](#))

| #  | b                | b <sup>++</sup> | b <sup>*</sup>   | b <sup>*++</sup> | b <sup>0</sup> | b <sup>0++</sup> | Seq. | y               | y <sup>++</sup> | y <sup>*</sup>  | y <sup>*++</sup> | y <sup>0</sup>  | y <sup>0++</sup> | #  |
|----|------------------|-----------------|------------------|------------------|----------------|------------------|------|-----------------|-----------------|-----------------|------------------|-----------------|------------------|----|
| 1  | 116.0342         | 58.5207         |                  |                  | 98.0237        | 49.5155          | D    |                 |                 |                 |                  |                 |                  | 10 |
| 2  | <b>229.1183</b>  | 115.0628        |                  |                  | 211.1077       | 106.0575         | I    | 1081.5160       | 541.2617        | 1064.4895       | 532.7484         | 1063.5055       | 532.2564         | 9  |
| 3  | <b>358.1609</b>  | 179.5841        |                  |                  | 340.1503       | 170.5788         | E    | <b>968.4320</b> | <b>484.7196</b> | <b>951.4054</b> | <b>476.2063</b>  | 950.4214        | <b>475.7143</b>  | 8  |
| 4  | <b>472.2038</b>  | 236.6055        | 455.1773         | 228.0923         | 454.1932       | 227.6003         | N    | <b>839.3894</b> | 420.1983        | 822.3628        | 411.6851         | <b>821.3788</b> | 411.1930         | 7  |
| 5  | <b>619.2722</b>  | 310.1397        | 602.2457         | 301.6265         | 601.2617       | 301.1345         | F    | <b>725.3464</b> | 363.1769        | 708.3199        | 354.6636         | 707.3359        | 354.1716         | 6  |
| 6  | <b>734.2992</b>  | 367.6532        | 717.2726         | 359.1399         | 716.2886       | <b>358.6479</b>  | N    | <b>578.2780</b> | 289.6427        | 561.2515        | 281.1294         | 560.2675        | 280.6374         | 5  |
| 7  | <b>821.3312</b>  | 411.1692        | 804.3046         | 402.6560         | 803.3206       | 402.1639         | S    | <b>463.2511</b> | 232.1292        | 446.2245        | 223.6159         | 445.2405        | 223.1239         | 4  |
| 8  | 922.3789         | 461.6931        | 905.3523         | 453.1798         | 904.3683       | 452.6878         | T    | <b>376.2191</b> | 188.6132        | 359.1925        | 180.0999         | <b>358.2085</b> | 179.6079         | 3  |
| 9  | <b>1050.4374</b> | 525.7224        | <b>1033.4109</b> | 517.2091         | 1032.4269      | 516.7171         | Q    | <b>275.1714</b> | 138.0893        | 258.1448        | 129.5761         |                 |                  | 2  |
| 10 |                  |                 |                  |                  |                |                  | K    | 147.1128        | 74.0600         | 130.0863        | 65.5468          |                 |                  | 1  |

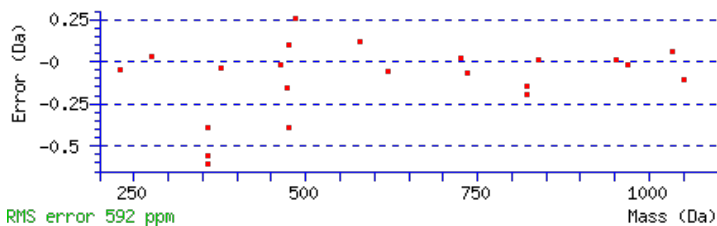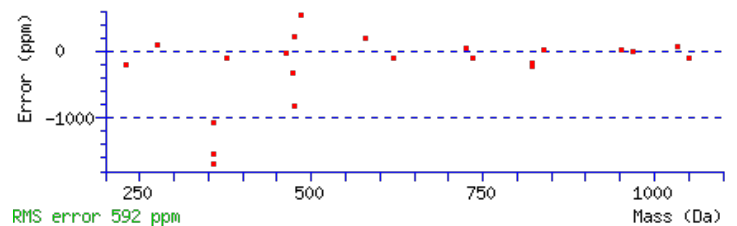

NCBI BLAST search of **DIENFNSTQK**

(Parameters: blastp, nr protein database, expect=20000, no filter, PAM30)

Other BLAST [web gateways](#)



**All matches to this query**

| Score | Mr(calc)  | Delta   | Sequence                    | Site Analysis        |
|-------|-----------|---------|-----------------------------|----------------------|
| 57.3  | 1195.5357 | 0.0019  | <a href="#">DIENFNSTQK</a>  | Deamidated N6 99.67% |
| 30.3  | 1195.5357 | 0.0019  | <a href="#">DIENFNSTQK</a>  | Deamidated N4 0.20%  |
| 28.5  | 1195.5357 | 0.0019  | <a href="#">DIENFNSTQK</a>  | Deamidated Q9 0.13%  |
| 8.2   | 1195.5365 | 0.0011  | <a href="#">NIKFMNHMK</a>   |                      |
| 7.3   | 1194.5339 | 1.0037  | <a href="#">LNQDFLECR</a>   |                      |
| 6.6   | 1194.5339 | 1.0037  | <a href="#">LNQDFLECR</a>   |                      |
| 4.5   | 1194.5299 | 1.0077  | <a href="#">NCTSDSVREK</a>  |                      |
| 3.5   | 1195.5357 | 0.0019  | <a href="#">INAYEQSDVR</a>  |                      |
| 2.3   | 1195.5356 | 0.0020  | <a href="#">EAEKQGYNEK</a>  |                      |
| 1.9   | 1195.5391 | -0.0015 | <a href="#">YMKTGGENTDK</a> |                      |

Mascot: <http://www.matrixscience.com/>

# MASCOT SCIENCE Mascot Search Results

## Peptide View

MS/MS Fragmentation of **IVQIYKDLLRNCNTENPPGCYR**

Found in **P43652** in **con\_Xuniprot\_HUMAN3**, AFAM\_HUMAN Afamin OS=Homo sapiens GN=AFM PE=1 SV=1

Match to Query 26015: 2883.359832 from(962.127220,3+) intensity(130010.4141) rtinseconds(1442) scans(3552) index(22565)

Title: 111019\_Est\_MI\_YS\_G\_03Spectrum3088\_scans\_\_3552

Data file C:\mascot\20140703\_Tmgf\_1D\CSV\_UseAnalysis\MasterCSV\All\_Glyco\mgf\ptm\UC18ERLIC\_PTM\_35D.mgf

Click mouse within plot area to zoom in by factor of two about that point

Or, to Da

Label all possible matches Label matches used for scoring

Show Y-axis

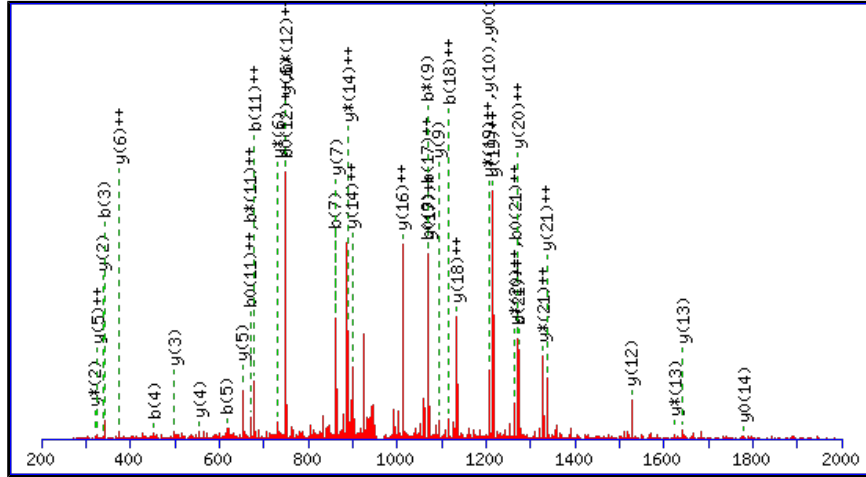

Monoisotopic mass of neutral peptide Mr(calc): 2883.3466

Fixed modifications: Carbamidomethyl (C) (apply to specified residues or termini only)

Variable modifications:

N11 : Deamidated (NQ)

Ions Score: 52 Expect: 0.0016

Matches : 43/234 fragment ions using 86 most intense peaks ([help](#))

| #  | b               | b <sup>++</sup>  | b <sup>*</sup>   | b <sup>*++</sup> | b <sup>0</sup>   | b <sup>0++</sup> | Seq. | y                | y <sup>++</sup>  | y <sup>*</sup>   | y <sup>*++</sup> | y <sup>0</sup>   | y <sup>0++</sup> | #  |
|----|-----------------|------------------|------------------|------------------|------------------|------------------|------|------------------|------------------|------------------|------------------|------------------|------------------|----|
| 1  | 114.0913        | 57.5493          |                  |                  |                  |                  | I    |                  |                  |                  |                  |                  |                  | 23 |
| 2  | 213.1598        | 107.0835         |                  |                  |                  |                  | V    | 2771.2698        | 1386.1385        | 2754.2433        | 1377.6253        | 2753.2593        | 1377.1333        | 22 |
| 3  | <b>341.2183</b> | 171.1128         | 324.1918         | 162.5995         |                  |                  | Q    | 2672.2014        | <b>1336.6043</b> | 2655.1749        | <b>1328.0911</b> | 2654.1908        | 1327.5991        | 21 |
| 4  | <b>454.3024</b> | 227.6548         | 437.2758         | 219.1416         |                  |                  | I    | 2544.1428        | <b>1272.5751</b> | 2527.1163        | <b>1264.0618</b> | 2526.1323        | 1263.5698        | 20 |
| 5  | <b>617.3657</b> | 309.1865         | 600.3392         | 300.6732         |                  |                  | Y    | 2431.0588        | <b>1216.0330</b> | 2414.0322        | <b>1207.5197</b> | 2413.0482        | <b>1207.0277</b> | 19 |
| 6  | 745.4607        | 373.2340         | 728.4341         | 364.7207         |                  |                  | K    | 2267.9954        | <b>1134.5014</b> | 2250.9689        | 1125.9881        | 2249.9849        | 1125.4961        | 18 |
| 7  | <b>860.4876</b> | 430.7475         | 843.4611         | 422.2342         | 842.4771         | 421.7422         | D    | 2139.9005        | <b>1070.4539</b> | 2122.8739        | 1061.9406        | 2121.8899        | 1061.4486        | 17 |
| 8  | 973.5717        | 487.2895         | 956.5451         | 478.7762         | 955.5611         | 478.2842         | L    | 2024.8735        | <b>1012.9404</b> | 2007.8470        | 1004.4271        | 2006.8630        | 1003.9351        | 16 |
| 9  | 1086.6558       | 543.8315         | <b>1069.6292</b> | 535.3182         | <b>1068.6452</b> | 534.8262         | L    | 1911.7895        | 956.3984         | 1894.7629        | 947.8851         | 1893.7789        | 947.3931         | 15 |
| 10 | 1242.7569       | 621.8821         | 1225.7303        | 613.3688         | 1224.7463        | 612.8768         | R    | 1798.7054        | <b>899.8563</b>  | 1781.6789        | <b>891.3431</b>  | <b>1780.6948</b> | 890.8511         | 14 |
| 11 | 1357.7838       | <b>679.3955</b>  | 1340.7573        | <b>670.8823</b>  | 1339.7732        | <b>670.3903</b>  | N    | <b>1642.6043</b> | 821.8058         | <b>1625.5777</b> | 813.2925         | 1624.5937        | 812.8005         | 13 |
| 12 | 1517.8145       | 759.4109         | 1500.7879        | <b>750.8976</b>  | 1499.8039        | <b>750.4056</b>  | C    | <b>1527.5773</b> | 764.2923         | 1510.5508        | 755.7790         | 1509.5668        | 755.2870         | 12 |
| 13 | 1677.8451       | 839.4262         | 1660.8186        | 830.9129         | 1659.8345        | 830.4209         | C    | 1367.5467        | 684.2770         | 1350.5201        | 675.7637         | 1349.5361        | 675.2717         | 11 |
| 14 | 1791.8880       | 896.4477         | 1774.8615        | 887.9344         | 1773.8775        | 887.4424         | N    | <b>1207.5160</b> | 604.2617         | 1190.4895        | 595.7484         | 1189.5055        | 595.2564         | 10 |
| 15 | 1892.9357       | 946.9715         | 1875.9092        | 938.4582         | 1874.9252        | 937.9662         | T    | <b>1093.4731</b> | 547.2402         | 1076.4466        | 538.7269         | 1075.4626        | 538.2349         | 9  |
| 16 | 2021.9783       | 1011.4928        | 2004.9518        | 1002.9795        | 2003.9677        | 1002.4875        | E    | 992.4254         | 496.7164         | 975.3989         | 488.2031         | 974.4149         | 487.7111         | 8  |
| 17 | 2136.0212       | <b>1068.5143</b> | 2118.9947        | 1060.0010        | 2118.0107        | 1059.5090        | N    | <b>863.3828</b>  | 432.1951         | 846.3563         | 423.6818         |                  |                  | 7  |
| 18 | 2233.0740       | <b>1117.0406</b> | 2216.0475        | 1108.5274        | 2215.0634        | 1108.0354        | P    | <b>749.3399</b>  | <b>375.1736</b>  | <b>732.3134</b>  | 366.6603         |                  |                  | 6  |
| 19 | 2330.1268       | 1165.5670        | 2313.1002        | 1157.0537        | 2312.1162        | 1156.5617        | P    | <b>652.2872</b>  | <b>326.6472</b>  | 635.2606         | 318.1339         |                  |                  | 5  |
| 20 | 2387.1482       | 1194.0778        | 2370.1217        | 1185.5645        | 2369.1377        | 1185.0725        | G    | <b>555.2344</b>  | 278.1208         | 538.2078         | 269.6076         |                  |                  | 4  |
| 21 | 2547.1789       | <b>1274.0931</b> | 2530.1523        | 1265.5798        | 2529.1683        | <b>1265.0878</b> | C    | <b>498.2129</b>  | 249.6101         | 481.1864         | 241.0968         |                  |                  | 3  |
| 22 | 2710.2422       | 1355.6247        | 2693.2157        | 1347.1115        | 2692.2316        | 1346.6195        | Y    | <b>338.1823</b>  | 169.5948         | <b>321.1557</b>  | 161.0815         |                  |                  | 2  |
| 23 |                 |                  |                  |                  |                  |                  | R    | 175.1190         | 88.0631          | 158.0924         | 79.5498          |                  |                  | 1  |

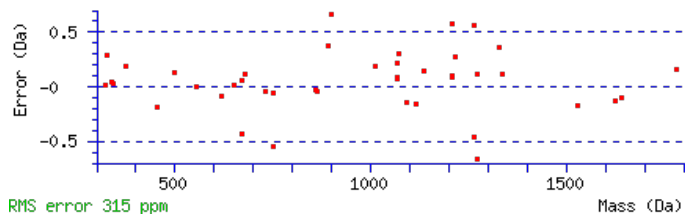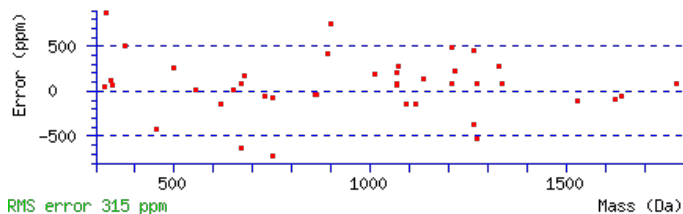

NCBI BLAST search of [IVQIYKDLLRNCCNTENPPGCYR](#)

(Parameters: blastp, nr protein database, expect=20000, no filter, PAM30)

Other BLAST [web gateways](#)

**All matches to this query**

| Score | Mr(calc)  | Delta   | Sequence                                  | Site Analysis         |
|-------|-----------|---------|-------------------------------------------|-----------------------|
| 51.9  | 2883.3466 | 0.0133  | <a href="#">IVQIYKDLLRNCCNTENPPGCYR</a>   | Deamidated N11 68.03% |
| 45.9  | 2883.3466 | 0.0133  | <a href="#">IVQIYKDLLRNCCNTENPPGCYR</a>   | Deamidated N14 16.97% |
| 45.1  | 2883.3466 | 0.0133  | <a href="#">IVQIYKDLLRNCCNTENPPGCYR</a>   | Deamidated N17 13.99% |
| 40.5  | 2882.3626 | 0.9973  | <a href="#">IVQIYKDLLRNCCNTENPPGCYR</a>   |                       |
| 33.6  | 2883.3466 | 0.0133  | <a href="#">IVQIYKDLLRNCCNTENPPGCYR</a>   | Deamidated Q3 1.01%   |
| 7.7   | 2882.3603 | 0.9995  | <a href="#">ARVVDQPIYIISQCGSSTRSEEQK</a>  |                       |
| 4.7   | 2883.3670 | -0.0072 | <a href="#">VSISLTVGENDTGLCYNSKMKYFEK</a> |                       |
| 4.3   | 2882.3465 | 1.0134  | <a href="#">MDPQNQHSGSSLVVIQPSLDSRQR</a>  |                       |
| 4.0   | 2883.3605 | -0.0006 | <a href="#">FOEESMACLEKGALEQFAKGMPLR</a>  |                       |
| 4.0   | 2882.3465 | 1.0134  | <a href="#">MDPQNQHSGSSLVVIQPSLDSRQR</a>  |                       |

Mascot: <http://www.matrixscience.com/>

# MASCOT SCIENCE Mascot Search Results

## Peptide View

MS/MS Fragmentation of **DLLRNCCNTENPPGCYR**

Found in **P43652** in **con\_Xuniprot\_HUMAN3**, AFAM\_HUMAN Afamin OS=Homo sapiens GN=AFM PE=1 SV=1

Match to Query 14386: 2138.901268 from(1070.457910,2+) intensity(16322.9268) rtinseconds(765) scans(1533) index(11593)

Title: 111019\_Est\_ISCardio\_NMI\_YS\_G\_8Spectrum1295\_scans\_1533

Data file C:\mascot\20140703\_Tmgf\_1D\CSV\_UseAnalysis\MasterCSV\All\_Glyco\mgf\ptm\UC18ERLIC\_PTM\_35D.mgf

Click mouse within plot area to zoom in by factor of two about that point

Or, to Da

Label all possible matches Label matches used for scoring

Show Y-axis

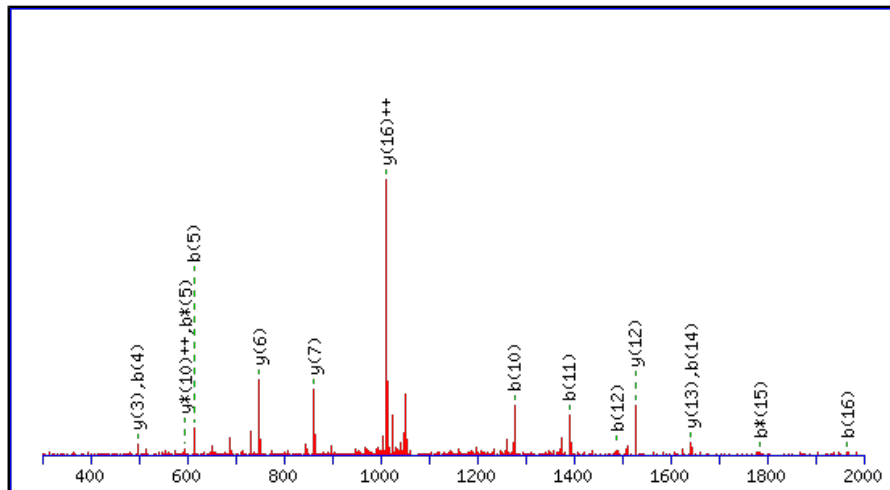

Monoisotopic mass of neutral peptide Mr(calc): 2138.8932

Fixed modifications: Carbamidomethyl (C) (apply to specified residues or termini only)

Variable modifications:

N5 : Deamidated (NQ)

Ions Score: 44 Expect: 0.0018

Matches : 16/172 fragment ions using 17 most intense peaks (help)

| #  | b         | b <sup>++</sup> | b*        | b <sup>+++</sup> | b <sup>0</sup> | b <sup>0++</sup> | Seq. | y         | y <sup>++</sup> | y*        | y <sup>+++</sup> | y <sup>0</sup> | y <sup>0++</sup> | #  |
|----|-----------|-----------------|-----------|------------------|----------------|------------------|------|-----------|-----------------|-----------|------------------|----------------|------------------|----|
| 1  | 116.0342  | 58.5207         |           |                  | 98.0237        | 49.5155          | D    |           |                 |           |                  |                |                  | 17 |
| 2  | 229.1183  | 115.0628        |           |                  | 211.1077       | 106.0575         | L    | 2024.8735 | 1012.9404       | 2007.8470 | 1004.4271        | 2006.8630      | 1003.9351        | 16 |
| 3  | 342.2023  | 171.6048        |           |                  | 324.1918       | 162.5995         | L    | 1911.7895 | 956.3984        | 1894.7629 | 947.8851         | 1893.7789      | 947.3931         | 15 |
| 4  | 498.3035  | 249.6554        | 481.2769  | 241.1421         | 480.2929       | 240.6501         | R    | 1798.7054 | 899.8563        | 1781.6789 | 891.3431         | 1780.6948      | 890.8511         | 14 |
| 5  | 613.3304  | 307.1688        | 596.3039  | 298.6556         | 595.3198       | 298.1636         | N    | 1642.6043 | 821.8058        | 1625.5777 | 813.2925         | 1624.5937      | 812.8005         | 13 |
| 6  | 773.3611  | 387.1842        | 756.3345  | 378.6709         | 755.3505       | 378.1789         | C    | 1527.5773 | 764.2923        | 1510.5508 | 755.7790         | 1509.5668      | 755.2870         | 12 |
| 7  | 933.3917  | 467.1995        | 916.3652  | 458.6862         | 915.3811       | 458.1942         | C    | 1367.5467 | 684.2770        | 1350.5201 | 675.7637         | 1349.5361      | 675.2717         | 11 |
| 8  | 1047.4346 | 524.2210        | 1030.4081 | 515.7077         | 1029.4241      | 515.2157         | N    | 1207.5160 | 604.2617        | 1190.4895 | 595.7484         | 1189.5055      | 595.2564         | 10 |
| 9  | 1148.4823 | 574.7448        | 1131.4558 | 566.2315         | 1130.4717      | 565.7395         | T    | 1093.4731 | 547.2402        | 1076.4466 | 538.7269         | 1075.4626      | 538.2349         | 9  |
| 10 | 1277.5249 | 639.2661        | 1260.4983 | 630.7528         | 1259.5143      | 630.2608         | E    | 992.4254  | 496.7164        | 975.3989  | 488.2031         | 974.4149       | 487.7111         | 8  |
| 11 | 1391.5678 | 696.2876        | 1374.5413 | 687.7743         | 1373.5573      | 687.2823         | N    | 863.3828  | 432.1951        | 846.3563  | 423.6818         |                |                  | 7  |
| 12 | 1488.6206 | 744.8139        | 1471.5940 | 736.3007         | 1470.6100      | 735.8087         | P    | 749.3399  | 375.1736        | 732.3134  | 366.6603         |                |                  | 6  |
| 13 | 1585.6734 | 793.3403        | 1568.6468 | 784.8270         | 1567.6628      | 784.3350         | P    | 652.2872  | 326.6472        | 635.2606  | 318.1339         |                |                  | 5  |
| 14 | 1642.6948 | 821.8510        | 1625.6683 | 813.3378         | 1624.6843      | 812.8458         | G    | 555.2344  | 278.1208        | 538.2078  | 269.6076         |                |                  | 4  |
| 15 | 1802.7255 | 901.8664        | 1785.6989 | 893.3531         | 1784.7149      | 892.8611         | C    | 498.2129  | 249.6101        | 481.1864  | 241.0968         |                |                  | 3  |
| 16 | 1965.7888 | 983.3980        | 1948.7622 | 974.8848         | 1947.7782      | 974.3928         | Y    | 338.1823  | 169.5948        | 321.1557  | 161.0815         |                |                  | 2  |
| 17 |           |                 |           |                  |                |                  | R    | 175.1190  | 88.0631         | 158.0924  | 79.5498          |                |                  | 1  |

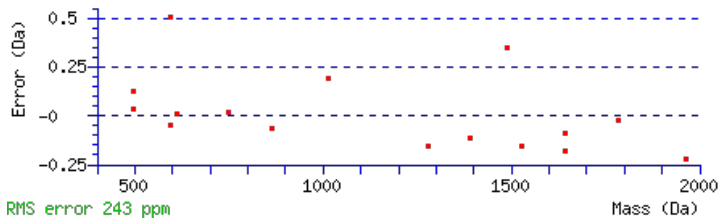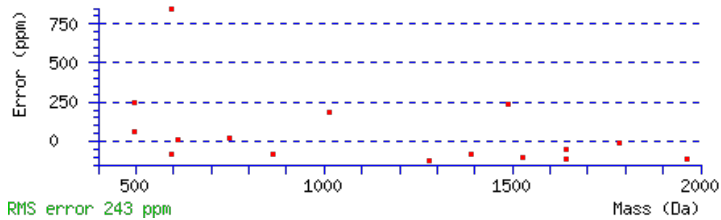

NCBI BLAST search of [DLLRNCCNTENPPGCYR](#)

(Parameters: blastp, nr protein database, expect=20000, no filter, PAM30)

Other BLAST [web gateways](#)

All matches to this query

| Score | Mr(calcd) | Delta   | Sequence                           | Site Analysis        |
|-------|-----------|---------|------------------------------------|----------------------|
| 44.4  | 2138.8932 | 0.0081  | <a href="#">DLLRNCCNTENPPGCYR</a>  | Deamidated N5 96.22% |
| 30.1  | 2138.8932 | 0.0081  | <a href="#">DLLRNCCNTENPPGCYR</a>  | Deamidated N8 3.57%  |
| 17.8  | 2138.8932 | 0.0081  | <a href="#">DLLRNCCNTENPPGCYR</a>  | Deamidated N11 0.21% |
| 3.5   | 2138.9071 | -0.0058 | <a href="#">QQAMHLCFENLMEGIER</a>  |                      |
| 3.1   | 2138.9071 | -0.0058 | <a href="#">QQAMHLCFENLMEGIER</a>  |                      |
| 0.5   | 2138.8957 | 0.0056  | <a href="#">NSQISNENDCNLQSCSLR</a> |                      |
| 0.5   | 2138.8957 | 0.0056  | <a href="#">NSQISNENDCNLQSCSLR</a> |                      |

Mascot: <http://www.matrixscience.com/>

# MASCOT SCIENCE Mascot Search Results

## Peptide View

MS/MS Fragmentation of **LGSFEGLVNLTFIHLQHN**R

Found in **P51884** in **con\_Xuniprot\_HUMAN3**, LUM\_HUMAN Lumican OS=Homo sapiens GN=LUM PE=1 SV=2

Match to Query 14856: 2195.159776 from(549.797220,4+) intensity(11262.4043) rtinseconds(2331) scans(6035) index(14734)

Title: 111019\_Est\_MI\_YP\_G\_03Spectrum5260\_scans\_\_6035

Data file C:\mascot\20140703\_Tmgf\_1D\CSV\_UseAnalysis\MasterCSV\All\_Glyco\mgf\ptm\UC18ERLIC\_PTM\_35D.mgf

Click mouse within plot area to zoom in by factor of two about that point

Or, to Da

Label all possible matches Label matches used for scoring

Show Y-axis

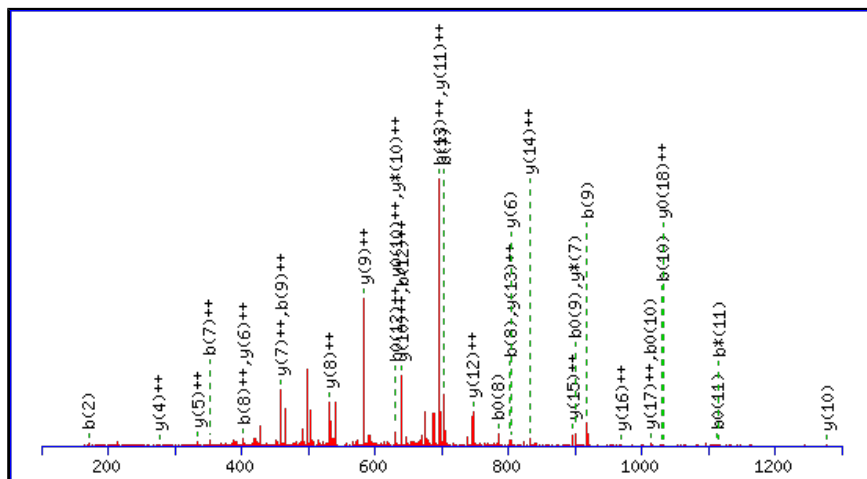

Monoisotopic mass of neutral peptide Mr(calc): 2195.1487

Fixed modifications: Carbamidomethyl (C) (apply to specified residues or termini only)

Variable modifications:

N9 : Deamidated (NQ)

Ions Score: 104 Expect: 6.9e-009

Matches : 36/180 fragment ions using 42 most intense peaks ([help](#))

| #  | b                | b <sup>++</sup> | b <sup>*</sup>   | b <sup>*++</sup> | b <sup>0</sup>   | b <sup>0++</sup> | Seq. | y                | y <sup>++</sup>  | y <sup>*</sup>  | y <sup>*++</sup> | y <sup>0</sup> | y <sup>0++</sup> | #  |
|----|------------------|-----------------|------------------|------------------|------------------|------------------|------|------------------|------------------|-----------------|------------------|----------------|------------------|----|
| 1  | 114.0913         | 57.5493         |                  |                  |                  |                  | L    |                  |                  |                 |                  |                |                  | 19 |
| 2  | <b>171.1128</b>  | 86.0600         |                  |                  |                  |                  | G    | 2083.0719        | 1042.0396        | 2066.0454       | 1033.5263        | 2065.0614      | <b>1033.0343</b> | 18 |
| 3  | 258.1448         | 129.5761        |                  |                  | 240.1343         | 120.5708         | S    | 2026.0505        | <b>1013.5289</b> | 2009.0239       | 1005.0156        | 2008.0399      | 1004.5236        | 17 |
| 4  | 405.2132         | 203.1103        |                  |                  | 387.2027         | 194.1050         | F    | 1939.0185        | <b>970.0129</b>  | 1921.9919       | 961.4996         | 1921.0079      | 961.0076         | 16 |
| 5  | 534.2558         | 267.6316        |                  |                  | 516.2453         | 258.6263         | E    | 1791.9500        | <b>896.4787</b>  | 1774.9235       | 887.9654         | 1773.9395      | 887.4734         | 15 |
| 6  | 591.2773         | 296.1423        |                  |                  | 573.2667         | 287.1370         | G    | 1662.9075        | <b>831.9574</b>  | 1645.8809       | 823.4441         | 1644.8969      | 822.9521         | 14 |
| 7  | <b>704.3614</b>  | <b>352.6843</b> |                  |                  | 686.3508         | 343.6790         | L    | 1605.8860        | <b>803.4466</b>  | 1588.8594       | 794.9334         | 1587.8754      | 794.4413         | 13 |
| 8  | <b>803.4298</b>  | <b>402.2185</b> |                  |                  | <b>785.4192</b>  | 393.2132         | V    | 1492.8019        | <b>746.9046</b>  | 1475.7754       | 738.3913         | 1474.7914      | 737.8993         | 12 |
| 9  | <b>918.4567</b>  | <b>459.7320</b> | 901.4302         | 451.2187         | <b>900.4462</b>  | 450.7267         | N    | 1393.7335        | <b>697.3704</b>  | 1376.7070       | 688.8571         | 1375.7229      | 688.3651         | 11 |
| 10 | <b>1031.5408</b> | 516.2740        | 1014.5142        | 507.7608         | <b>1013.5302</b> | 507.2687         | L    | <b>1278.7066</b> | <b>639.8569</b>  | 1261.6800       | <b>631.3436</b>  | 1260.6960      | <b>630.8516</b>  | 10 |
| 11 | 1132.5885        | 566.7979        | <b>1115.5619</b> | 558.2846         | <b>1114.5779</b> | 557.7926         | T    | 1165.6225        | <b>583.3149</b>  | 1148.5960       | 574.8016         | 1147.6119      | 574.3096         | 9  |
| 12 | 1279.6569        | <b>640.3321</b> | 1262.6303        | 631.8188         | 1261.6463        | <b>631.3268</b>  | F    | 1064.5748        | <b>532.7910</b>  | 1047.5483       | 524.2778         |                |                  | 8  |
| 13 | 1392.7409        | <b>696.8741</b> | 1375.7144        | 688.3608         | 1374.7304        | 687.8688         | I    | 917.5064         | <b>459.2568</b>  | <b>900.4799</b> | 450.7436         |                |                  | 7  |
| 14 | 1529.7999        | 765.4036        | 1512.7733        | 756.8903         | 1511.7893        | 756.3983         | H    | <b>804.4223</b>  | <b>402.7148</b>  | 787.3958        | 394.2015         |                |                  | 6  |
| 15 | 1642.8839        | 821.9456        | 1625.8574        | 813.4323         | 1624.8734        | 812.9403         | L    | 667.3634         | <b>334.1854</b>  | 650.3369        | 325.6721         |                |                  | 5  |
| 16 | 1770.9425        | 885.9749        | 1753.9160        | 877.4616         | 1752.9319        | 876.9696         | Q    | 554.2794         | <b>277.6433</b>  | 537.2528        | 269.1300         |                |                  | 4  |
| 17 | 1908.0014        | 954.5043        | 1890.9749        | 945.9911         | 1889.9908        | 945.4991         | H    | 426.2208         | 213.6140         | 409.1942        | 205.1008         |                |                  | 3  |
| 18 | 2022.0443        | 1011.5258       | 2005.0178        | 1003.0125        | 2004.0338        | 1002.5205        | N    | 289.1619         | 145.0846         | 272.1353        | 136.5713         |                |                  | 2  |
| 19 |                  |                 |                  |                  |                  |                  | R    | 175.1190         | 88.0631          | 158.0924        | 79.5498          |                |                  | 1  |

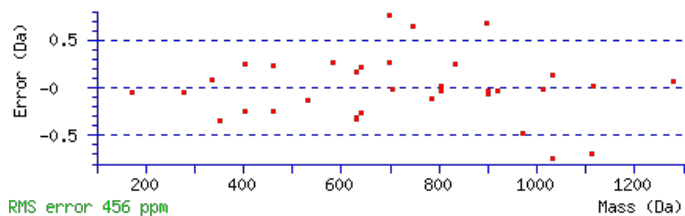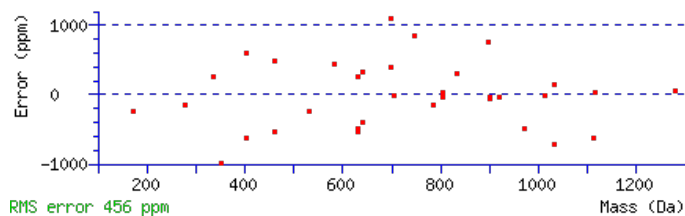

NCBI BLAST search of [LGSFEGLVNLTFIHLQHNR](#)

(Parameters: blastp, nr protein database, expect=20000, no filter, PAM30)

Other BLAST [web gateways](#)

**All matches to this query**

| Score | Mr(calc)  | Delta   | Sequence                             | Site Analysis         |
|-------|-----------|---------|--------------------------------------|-----------------------|
| 104.0 | 2195.1487 | 0.0110  | <a href="#">LGSFEGLVNLTFIHLQHNR</a>  | Deamidated N9 58.77%  |
| 99.5  | 2195.1487 | 0.0110  | <a href="#">LGSFEGLVNLTFIHLQHNR</a>  | Deamidated N18 20.85% |
| 99.4  | 2195.1487 | 0.0110  | <a href="#">LGSFEGLVNLTFIHLQHNR</a>  | Deamidated Q16 20.38% |
| 70.9  | 2194.1647 | 0.9951  | <a href="#">LGSFEGLVNLTFIHLQHNR</a>  |                       |
| 12.6  | 2195.1507 | 0.0091  | <a href="#">MAAEQASLAELKLHEAELLK</a> |                       |
| 11.7  | 2195.1660 | -0.0062 | <a href="#">MTVADSPESLRLATEFAKIV</a> |                       |
| 9.0   | 2194.1602 | 0.9996  | <a href="#">LPEKNRQMLQLLMNHLAK</a>   |                       |
| 8.9   | 2193.1555 | 2.0043  | <a href="#">RFDLIRDLHFAAIEANHR</a>   |                       |
| 8.3   | 2195.1620 | -0.0022 | <a href="#">ILVIREIQEAIIVANASTMH</a> |                       |
| 8.3   | 2195.1620 | -0.0022 | <a href="#">ILVIREIQEAIIVANASTMH</a> |                       |

Mascot: <http://www.matrixscience.com/>



# MASCOT SCIENCE Mascot Search Results

## Peptide View

MS/MS Fragmentation of **AFENVTDLQWLILDHNLLENSK**

Found in **P51884** in **con\_Xuniprot\_HUMAN3**, LUM\_HUMAN Lumican OS=Homo sapiens GN=LUM PE=1 SV=2

Match to Query 22296: 2612.314888 from(1307.164720,2+) intensity(28115.1191) rtinseconds(2539) scans(6513) index(12886)

Title: 111019\_Est\_ISCardio\_NMI\_YS\_G\_9Spectrum5729\_scans\_\_6513

Data file C:\mascot\20140703\_Tmgf\_1D\CSV\_UseAnalysis\MasterCSV\All\_Glyco\mgf\ptm\UC18ERLIC\_PTM\_35D.mgf

Click mouse within plot area to zoom in by factor of two about that point

Or,  to  Da

Label all possible matches  Label matches used for scoring

Show Y-axis

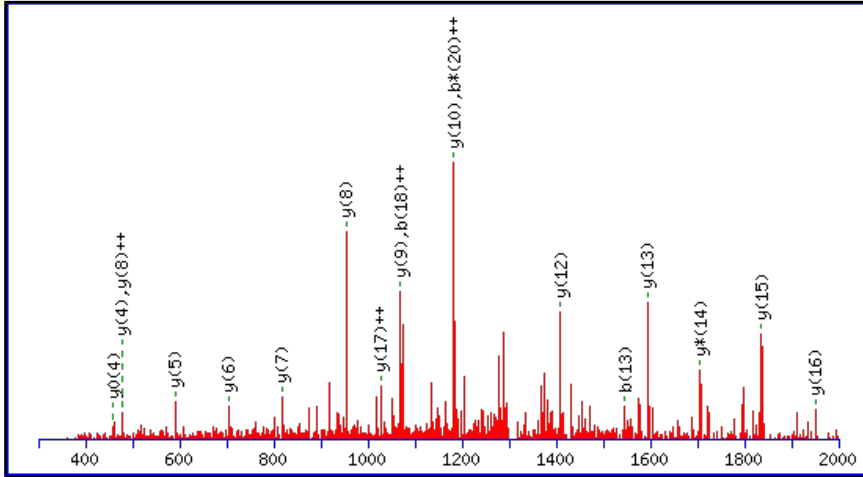

Monoisotopic mass of neutral peptide Mr(calc): 2612.3122

Fixed modifications: Carbamidomethyl (C) (apply to specified residues or termini only)

Variable modifications:

N4 : Deamidated (NQ)

Ions Score: 88 Expect: 3.4e-007

Matches : 18/240 fragment ions using 17 most intense peaks ([help](#))

| #  | b         | b <sup>++</sup> | b*        | b <sup>*++</sup> | b <sup>0</sup> | b <sup>0++</sup> | Seq. | y         | y <sup>++</sup> | y*        | y <sup>*++</sup> | y <sup>0</sup> | y <sup>0++</sup> | #  |
|----|-----------|-----------------|-----------|------------------|----------------|------------------|------|-----------|-----------------|-----------|------------------|----------------|------------------|----|
| 1  | 72.0444   | 36.5258         |           |                  |                |                  | A    |           |                 |           |                  |                |                  | 22 |
| 2  | 219.1128  | 110.0600        |           |                  |                |                  | F    | 2542.2824 | 1271.6448       | 2525.2558 | 1263.1316        | 2524.2718      | 1262.6396        | 21 |
| 3  | 348.1554  | 174.5813        |           |                  | 330.1448       | 165.5761         | E    | 2395.2140 | 1198.1106       | 2378.1874 | 1189.5974        | 2377.2034      | 1189.1053        | 20 |
| 4  | 463.1823  | 232.0948        | 446.1558  | 223.5815         | 445.1718       | 223.0895         | N    | 2266.1714 | 1133.5893       | 2249.1448 | 1125.0761        | 2248.1608      | 1124.5840        | 19 |
| 5  | 562.2508  | 281.6290        | 545.2242  | 273.1157         | 544.2402       | 272.6237         | V    | 2151.1444 | 1076.0759       | 2134.1179 | 1067.5626        | 2133.1339      | 1067.0706        | 18 |
| 6  | 663.2984  | 332.1529        | 646.2719  | 323.6396         | 645.2879       | 323.1476         | T    | 2052.0760 | 1026.5417       | 2035.0495 | 1018.0284        | 2034.0655      | 1017.5364        | 17 |
| 7  | 778.3254  | 389.6663        | 761.2988  | 381.1531         | 760.3148       | 380.6610         | D    | 1951.0284 | 976.0178        | 1934.0018 | 967.5045         | 1933.0178      | 967.0125         | 16 |
| 8  | 891.4094  | 446.2084        | 874.3829  | 437.6951         | 873.3989       | 437.2031         | L    | 1836.0014 | 918.5043        | 1818.9749 | 909.9911         | 1817.9908      | 909.4991         | 15 |
| 9  | 1019.4680 | 510.2376        | 1002.4415 | 501.7244         | 1001.4575      | 501.2324         | Q    | 1722.9173 | 861.9623        | 1705.8908 | 853.4490         | 1704.9068      | 852.9570         | 14 |
| 10 | 1205.5473 | 603.2773        | 1188.5208 | 594.7640         | 1187.5368      | 594.2720         | W    | 1594.8588 | 797.9330        | 1577.8322 | 789.4197         | 1576.8482      | 788.9277         | 13 |
| 11 | 1318.6314 | 659.8193        | 1301.6048 | 651.3061         | 1300.6208      | 650.8141         | L    | 1408.7795 | 704.8934        | 1391.7529 | 696.3801         | 1390.7689      | 695.8881         | 12 |
| 12 | 1431.7155 | 716.3614        | 1414.6889 | 707.8481         | 1413.7049      | 707.3561         | I    | 1295.6954 | 648.3513        | 1278.6688 | 639.8381         | 1277.6848      | 639.3461         | 11 |
| 13 | 1544.7995 | 772.9034        | 1527.7730 | 764.3901         | 1526.7890      | 763.8981         | L    | 1182.6113 | 591.8093        | 1165.5848 | 583.2960         | 1164.6008      | 582.8040         | 10 |
| 14 | 1659.8265 | 830.4169        | 1642.7999 | 821.9036         | 1641.8159      | 821.4116         | D    | 1069.5273 | 535.2673        | 1052.5007 | 526.7540         | 1051.5167      | 526.2620         | 9  |
| 15 | 1796.8854 | 898.9463        | 1779.8588 | 890.4331         | 1778.8748      | 889.9410         | H    | 954.5003  | 477.7538        | 937.4738  | 469.2405         | 936.4898       | 468.7485         | 8  |
| 16 | 1910.9283 | 955.9678        | 1893.9018 | 947.4545         | 1892.9177      | 946.9625         | N    | 817.4414  | 409.2243        | 800.4149  | 400.7111         | 799.4308       | 400.2191         | 7  |
| 17 | 2024.0124 | 1012.5098       | 2006.9858 | 1003.9965        | 2006.0018      | 1003.5045        | L    | 703.3985  | 352.2029        | 686.3719  | 343.6896         | 685.3879       | 343.1976         | 6  |
| 18 | 2137.0964 | 1069.0519       | 2120.0699 | 1060.5386        | 2119.0859      | 1060.0466        | L    | 590.3144  | 295.6608        | 573.2879  | 287.1476         | 572.3039       | 286.6556         | 5  |
| 19 | 2266.1390 | 1133.5732       | 2249.1125 | 1125.0599        | 2248.1285      | 1124.5679        | E    | 477.2304  | 239.1188        | 460.2038  | 230.6055         | 459.2198       | 230.1135         | 4  |
| 20 | 2380.1820 | 1190.5946       | 2363.1554 | 1182.0813        | 2362.1714      | 1181.5893        | N    | 348.1878  | 174.5975        | 331.1612  | 166.0842         | 330.1772       | 165.5922         | 3  |
| 21 | 2467.2140 | 1234.1106       | 2450.1874 | 1225.5974        | 2449.2034      | 1225.1053        | S    | 234.1448  | 117.5761        | 217.1183  | 109.0628         | 216.1343       | 108.5708         | 2  |
| 22 |           |                 |           |                  |                |                  | K    | 147.1128  | 74.0600         | 130.0863  | 65.5468          |                |                  | 1  |

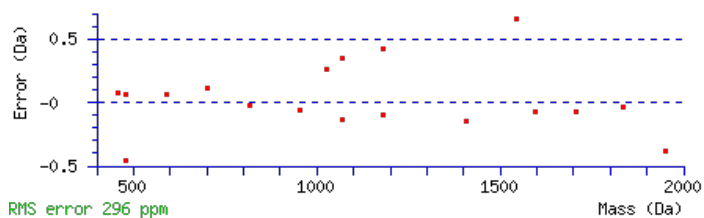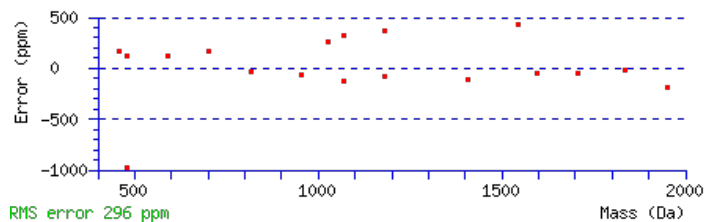

NCBI BLAST search of [AFENVTDLQWLILDHNLENSK](#)

(Parameters: blastp, nr protein database, expect=20000, no filter, PAM30)

Other BLAST [web gateways](#)

All matches to this query

| Score | Mr(calc)  | Delta  | Sequence                               | Site Analysis        |
|-------|-----------|--------|----------------------------------------|----------------------|
| 88.3  | 2612.3122 | 0.0027 | <a href="#">AFENVTDLQWLILDHNLENSK</a>  | Deamidated N4 99.78% |
| 61.4  | 2612.3122 | 0.0027 | <a href="#">AFENVTDLQWLILDHNLENSK</a>  | Deamidated Q9 0.20%  |
| 49.5  | 2612.3122 | 0.0027 | <a href="#">AFENVTDLQWLILDHNLENSK</a>  | Deamidated N16 0.01% |
| 25.1  | 2612.3122 | 0.0027 | <a href="#">AFENVTDLQWLILDHNLENSK</a>  | Deamidated N20 0.00% |
| 3.7   | 2611.3243 | 0.9906 | <a href="#">YQALGHILLEQYIYELLEKVCK</a> |                      |
| 3.1   | 2610.2959 | 2.0190 | <a href="#">RPPLQPSQRLNDDMKEILNSEK</a> |                      |
| 1.9   | 2612.3056 | 0.0092 | <a href="#">YLVTWNIQRPNRKSLEFAECK</a>  |                      |

Mascot: <http://www.matrixscience.com/>

# MASCOT SCIENCE Mascot Search Results

## Peptide View

MS/MS Fragmentation of **LHINHNNLTESVGPLPK**

Found in **P51884** in **con\_Xuniprot\_HUMAN3**, LUM\_HUMAN Lumican OS=Homo sapiens GN=LUM PE=1 SV=2

Match to Query 11095: 1882.996668 from(942.505610,2+) intensity(22605.3535) rtinseconds(1011) scans(2233) index(8239)

Title: 111019\_Est\_ISCardio\_NMI\_YS\_G\_3Spectrum1870\_scans\_\_2233

Data file C:\\mascot\\20140703\_Tmgf\_1D\\CSV\_UseAnalysis\\MasterCSV\\All\_Glyco\\mgf\\ptm\\UC18ERLIC\_PTM\_35D.mgf

Click mouse within plot area to zoom in by factor of two about that point

Or, to Da

Label all possible matches Label matches used for scoring

Show Y-axis

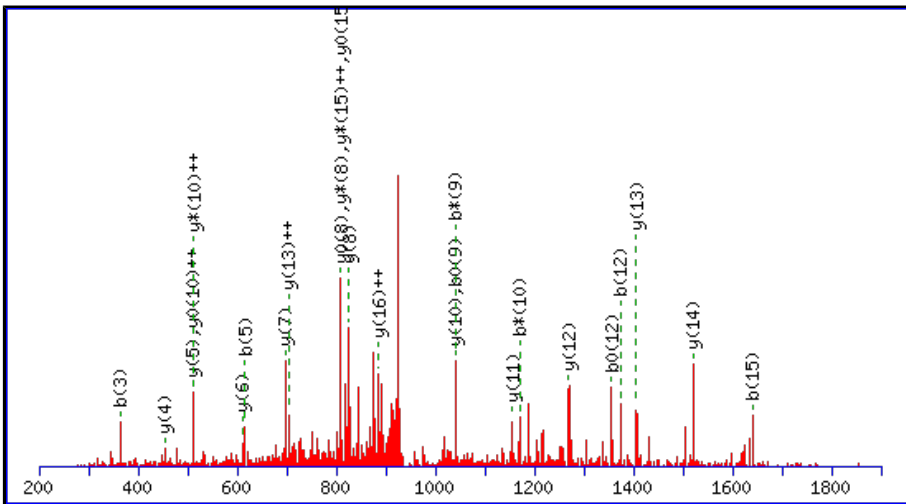

Monoisotopic mass of neutral peptide Mr(calc): 1882.9901

Fixed modifications: Carbamidomethyl (C) (apply to specified residues or termini only)

Variable modifications:

N7 : Deamidated (NQ)

Ions Score: 73 Expect: 9e-006

Matches : 26/158 fragment ions using 31 most intense peaks ([help](#))

| #  | b         | b <sup>++</sup> | b <sup>*</sup> | b <sup>*++</sup> | b <sup>0</sup> | b <sup>0++</sup> | Seq. | y         | y <sup>++</sup> | y <sup>*</sup> | y <sup>*++</sup> | y <sup>0</sup> | y <sup>0++</sup> | #  |
|----|-----------|-----------------|----------------|------------------|----------------|------------------|------|-----------|-----------------|----------------|------------------|----------------|------------------|----|
| 1  | 114.0913  | 57.5493         |                |                  |                |                  | L    |           |                 |                |                  |                |                  | 17 |
| 2  | 251.1503  | 126.0788        |                |                  |                |                  | H    | 1770.9133 | 885.9603        | 1753.8868      | 877.4470         | 1752.9028      | 876.9550         | 16 |
| 3  | 364.2343  | 182.6208        |                |                  |                |                  | I    | 1633.8544 | 817.4308        | 1616.8279      | 808.9176         | 1615.8438      | 808.4256         | 15 |
| 4  | 478.2772  | 239.6423        | 461.2507       | 231.1290         |                |                  | N    | 1520.7703 | 760.8888        | 1503.7438      | 752.3755         | 1502.7598      | 751.8835         | 14 |
| 5  | 615.3362  | 308.1717        | 598.3096       | 299.6584         |                |                  | H    | 1406.7274 | 703.8673        | 1389.7009      | 695.3541         | 1388.7169      | 694.8621         | 13 |
| 6  | 729.3791  | 365.1932        | 712.3525       | 356.6799         |                |                  | N    | 1269.6685 | 635.3379        | 1252.6420      | 626.8246         | 1251.6579      | 626.3326         | 12 |
| 7  | 844.4060  | 422.7067        | 827.3795       | 414.1934         |                |                  | N    | 1155.6256 | 578.3164        | 1138.5990      | 569.8032         | 1137.6150      | 569.3111         | 11 |
| 8  | 957.4901  | 479.2487        | 940.4635       | 470.7354         |                |                  | L    | 1040.5986 | 520.8030        | 1023.5721      | 512.2897         | 1022.5881      | 511.7977         | 10 |
| 9  | 1058.5378 | 529.7725        | 1041.5112      | 521.2592         | 1040.5272      | 520.7672         | T    | 927.5146  | 464.2609        | 910.4880       | 455.7477         | 909.5040       | 455.2556         | 9  |
| 10 | 1187.5804 | 594.2938        | 1170.5538      | 585.7805         | 1169.5698      | 585.2885         | E    | 826.4669  | 413.7371        | 809.4403       | 405.2238         | 808.4563       | 404.7318         | 8  |
| 11 | 1274.6124 | 637.8098        | 1257.5858      | 629.2966         | 1256.6018      | 628.8046         | S    | 697.4243  | 349.2158        | 680.3978       | 340.7025         | 679.4137       | 340.2105         | 7  |
| 12 | 1373.6808 | 687.3440        | 1356.6543      | 678.8308         | 1355.6702      | 678.3388         | V    | 610.3923  | 305.6998        | 593.3657       | 297.1865         |                |                  | 6  |
| 13 | 1430.7023 | 715.8548        | 1413.6757      | 707.3415         | 1412.6917      | 706.8495         | G    | 511.3239  | 256.1656        | 494.2973       | 247.6523         |                |                  | 5  |
| 14 | 1527.7550 | 764.3812        | 1510.7285      | 755.8679         | 1509.7445      | 755.3759         | P    | 454.3024  | 227.6548        | 437.2758       | 219.1416         |                |                  | 4  |
| 15 | 1640.8391 | 820.9232        | 1623.8125      | 812.4099         | 1622.8285      | 811.9179         | L    | 357.2496  | 179.1285        | 340.2231       | 170.6152         |                |                  | 3  |
| 16 | 1737.8919 | 869.4496        | 1720.8653      | 860.9363         | 1719.8813      | 860.4443         | P    | 244.1656  | 122.5864        | 227.1390       | 114.0731         |                |                  | 2  |
| 17 |           |                 |                |                  |                |                  | K    | 147.1128  | 74.0600         | 130.0863       | 65.5468          |                |                  | 1  |

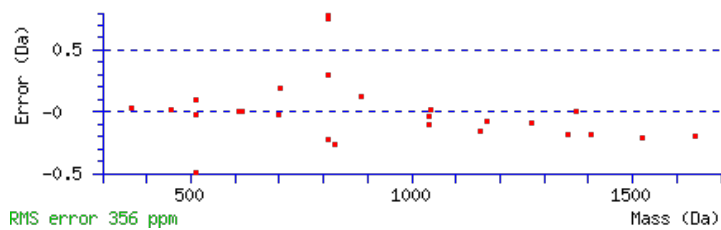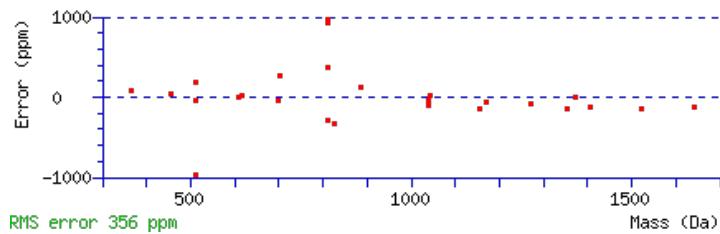

NCBI **BLAST** search of [LHINHNNLTESVGPLPK](#)

(Parameters: blastp, nr protein database, expect=20000, no filter, PAM30)

Other BLAST [web gateways](#)

**All matches to this query**

| Score | Mr(calc)  | Delta  | Sequence                          | Site Analysis        |
|-------|-----------|--------|-----------------------------------|----------------------|
| 72.9  | 1882.9901 | 0.0066 | <a href="#">LHINHNNLTESVGPLPK</a> | Deamidated N7 95.44% |
| 59.7  | 1882.9901 | 0.0066 | <a href="#">LHINHNNLTESVGPLPK</a> | Deamidated N6 4.53%  |
| 38.9  | 1882.9901 | 0.0066 | <a href="#">LHINHNNLTESVGPLPK</a> | Deamidated N4 0.04%  |
| 3.6   | 1881.9982 | 0.9985 | <a href="#">NKGPVSIKVQVPNMQDK</a> |                      |
| 0.3   | 1881.9870 | 1.0097 | <a href="#">DIKLENLMLDKDGHK</a>   |                      |
| 0.3   | 1881.9870 | 1.0097 | <a href="#">DLKLENLMLDKDGHK</a>   |                      |

Mascot: <http://www.matrixscience.com/>

# MASCOT SCIENCE Mascot Search Results

## Peptide View

MS/MS Fragmentation of **KLHINHNNLTESVGPLPK**

Found in **P51884** in **con\_Xuniprot\_HUMAN3**, LUM\_HUMAN Lumican OS=Homo sapiens GN=LUM PE=1 SV=2

Match to Query 12255: 2011.092822 from(671.371550,3+) intensity(25432.5391) rtinseconds(866) scans(1850) index(8219)

Title: 111019\_Est\_ISCardio\_NMI\_YS\_G\_3Spectrum1533\_scans\_\_1850

Data file C:\mascot\20140703\_Tmgf\_1D\CSV\_UseAnalysis\MasterCSV\All\_Glyco\mgf\ptm\UC18ERLIC\_PTM\_35D.mgf

Click mouse within plot area to zoom in by factor of two about that point

Or, to Da

Label all possible matches Label matches used for scoring

Show Y-axis

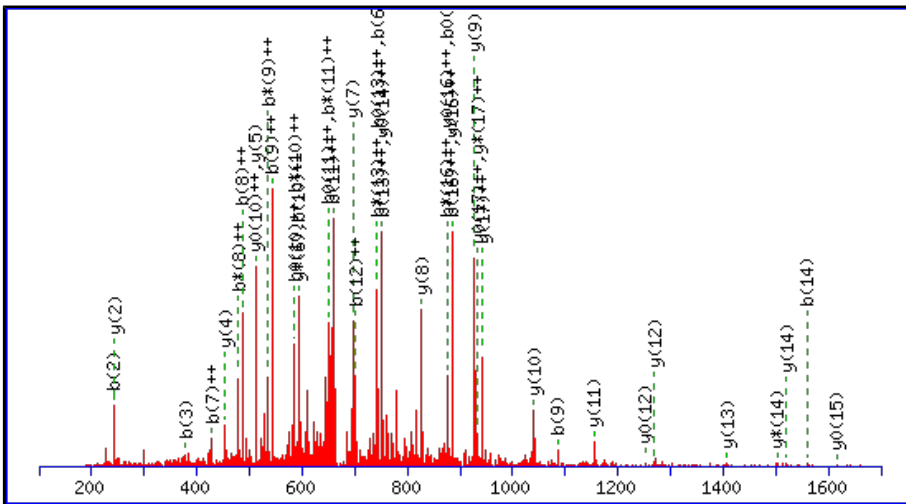

Monoisotopic mass of neutral peptide Mr(calc): 2011.0850

Fixed modifications: Carbamidomethyl (C) (apply to specified residues or termini only)

Variable modifications:

N8 : Deamidated (NQ)

Ions Score: 62 Expect: 8.3e-005

Matches : 46/174 fragment ions using 60 most intense peaks ([help](#))

| #  | b                | b <sup>++</sup> | b <sup>*</sup> | b <sup>*++</sup> | b <sup>0</sup> | b <sup>0++</sup> | Seq.     | y                | y <sup>++</sup> | y <sup>*</sup>   | y <sup>*++</sup> | y <sup>0</sup>   | y <sup>0++</sup> | #         |
|----|------------------|-----------------|----------------|------------------|----------------|------------------|----------|------------------|-----------------|------------------|------------------|------------------|------------------|-----------|
| 1  | 129.1022         | 65.0548         | 112.0757       | 56.5415          |                |                  | <b>K</b> |                  |                 |                  |                  |                  |                  | <b>18</b> |
| 2  | <b>242.1863</b>  | 121.5968        | 225.1598       | 113.0835         |                |                  | <b>L</b> | 1883.9974        | <b>942.5023</b> | 1866.9708        | <b>933.9891</b>  | 1865.9868        | <b>933.4970</b>  | <b>17</b> |
| 3  | <b>379.2452</b>  | 190.1262        | 362.2187       | 181.6130         |                |                  | <b>H</b> | 1770.9133        | <b>885.9603</b> | 1753.8868        | 877.4470         | 1752.9028        | <b>876.9550</b>  | <b>16</b> |
| 4  | 492.3293         | 246.6683        | 475.3027       | 238.1550         |                |                  | <b>I</b> | 1633.8544        | 817.4308        | 1616.8279        | 808.9176         | <b>1615.8438</b> | 808.4256         | <b>15</b> |
| 5  | 606.3722         | 303.6897        | 589.3457       | 295.1765         |                |                  | <b>N</b> | <b>1520.7703</b> | 760.8888        | <b>1503.7438</b> | 752.3755         | 1502.7598        | <b>751.8835</b>  | <b>14</b> |
| 6  | <b>743.4311</b>  | 372.2192        | 726.4046       | 363.7059         |                |                  | <b>H</b> | <b>1406.7274</b> | 703.8673        | 1389.7009        | 695.3541         | 1388.7169        | 694.8621         | <b>13</b> |
| 7  | 857.4740         | <b>429.2407</b> | 840.4475       | 420.7274         |                |                  | <b>N</b> | <b>1269.6685</b> | 635.3379        | 1252.6420        | 626.8246         | <b>1251.6579</b> | 626.3326         | <b>12</b> |
| 8  | 972.5010         | <b>486.7541</b> | 955.4744       | <b>478.2409</b>  |                |                  | <b>N</b> | <b>1155.6256</b> | 578.3164        | 1138.5990        | 569.8032         | 1137.6150        | 569.3111         | <b>11</b> |
| 9  | <b>1085.5851</b> | <b>543.2962</b> | 1068.5585      | <b>534.7829</b>  |                |                  | <b>L</b> | <b>1040.5986</b> | 520.8030        | 1023.5721        | 512.2897         | 1022.5881        | <b>511.7977</b>  | <b>10</b> |
| 10 | 1186.6327        | <b>593.8200</b> | 1169.6062      | <b>585.3067</b>  | 1168.6222      | <b>584.8147</b>  | <b>T</b> | <b>927.5146</b>  | 464.2609        | 910.4880         | 455.7477         | 909.5040         | 455.2556         | <b>9</b>  |
| 11 | 1315.6753        | <b>658.3413</b> | 1298.6488      | <b>649.8280</b>  | 1297.6648      | <b>649.3360</b>  | <b>E</b> | <b>826.4669</b>  | 413.7371        | 809.4403         | 405.2238         | 808.4563         | 404.7318         | <b>8</b>  |
| 12 | 1402.7074        | <b>701.8573</b> | 1385.6808      | 693.3440         | 1384.6968      | 692.8520         | <b>S</b> | <b>697.4243</b>  | 349.2158        | 680.3978         | 340.7025         | 679.4137         | 340.2105         | <b>7</b>  |
| 13 | 1501.7758        | <b>751.3915</b> | 1484.7492      | <b>742.8782</b>  | 1483.7652      | <b>742.3862</b>  | <b>V</b> | 610.3923         | 305.6998        | <b>593.3657</b>  | 297.1865         |                  |                  | <b>6</b>  |
| 14 | <b>1558.7972</b> | 779.9023        | 1541.7707      | 771.3890         | 1540.7867      | 770.8970         | <b>G</b> | <b>511.3239</b>  | 256.1656        | 494.2973         | 247.6523         |                  |                  | <b>5</b>  |
| 15 | 1655.8500        | 828.4286        | 1638.8234      | 819.9154         | 1637.8394      | 819.4234         | <b>P</b> | <b>454.3024</b>  | 227.6548        | 437.2758         | 219.1416         |                  |                  | <b>4</b>  |
| 16 | 1768.9341        | <b>884.9707</b> | 1751.9075      | <b>876.4574</b>  | 1750.9235      | <b>875.9654</b>  | <b>L</b> | 357.2496         | 179.1285        | 340.2231         | 170.6152         |                  |                  | <b>3</b>  |
| 17 | 1865.9868        | <b>933.4970</b> | 1848.9603      | 924.9838         | 1847.9763      | 924.4918         | <b>P</b> | <b>244.1656</b>  | 122.5864        | 227.1390         | 114.0731         |                  |                  | <b>2</b>  |
| 18 |                  |                 |                |                  |                |                  | <b>K</b> | 147.1128         | 74.0600         | 130.0863         | 65.5468          |                  |                  | <b>1</b>  |

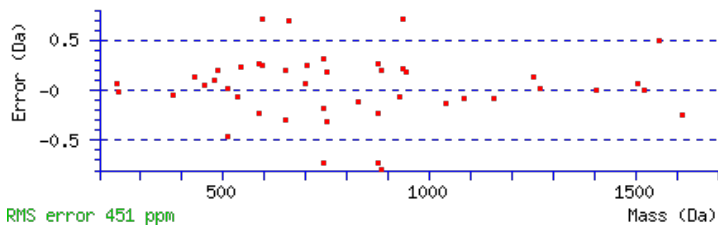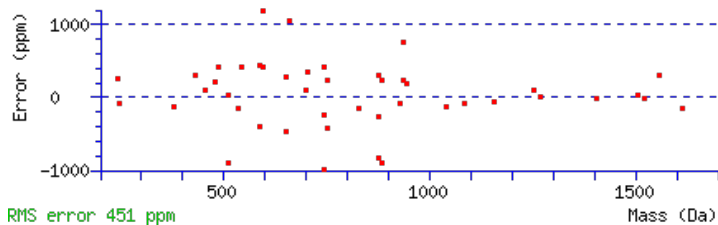

NCBI **BLAST** search of [KLHINHNNLTESVGPLPK](#)

(Parameters: blastp, nr protein database, expect=20000, no filter, PAM30)

Other BLAST [web gateways](#)

**All matches to this query**

| Score | Mr(calc)  | Delta   | Sequence                            | Site Analysis        |
|-------|-----------|---------|-------------------------------------|----------------------|
| 62.3  | 2011.0850 | 0.0078  | <a href="#">KLHINHNNLTESVGPLPK</a>  | Deamidated N8 68.20% |
| 58.5  | 2011.0850 | 0.0078  | <a href="#">KLHINHNNLTESVGPLPK</a>  | Deamidated N7 28.36% |
| 49.3  | 2011.0850 | 0.0078  | <a href="#">KLHINHNNLTESVGPLPK</a>  | Deamidated N5 3.44%  |
| 7.5   | 2011.0963 | -0.0034 | <a href="#">QLRIEALRETASAAAHEK</a>  |                      |
| 3.2   | 2011.1024 | -0.0096 | <a href="#">VTGVTTQGVKSLTSMYVK</a>  |                      |
| 2.3   | 2011.0884 | 0.0044  | <a href="#">PSLMGLGDIIISQQLVERR</a> |                      |
| 2.2   | 2011.0850 | 0.0078  | <a href="#">HLKQQQYRAENOILLK</a>    |                      |
| 2.1   | 2011.0850 | 0.0078  | <a href="#">EAKDVWNQIALARAVLGR</a>  |                      |
| 1.8   | 2011.0837 | 0.0091  | <a href="#">ENVALKVESAAQPKQVLK</a>  |                      |
| 1.8   | 2011.0837 | 0.0091  | <a href="#">ENVALKVESAAQPKQVLK</a>  |                      |

Mascot: <http://www.matrixscience.com/>

# MASCOT SCIENCE Mascot Search Results

## Peptide View

MS/MS Fragmentation of **AFENVTDLQWLILDHNLLENSKIK**

Found in **P51884** in **con\_Xuniprot\_HUMAN3**, LUM\_HUMAN Lumican OS=Homo sapiens GN=LUM PE=1 SV=2

Match to Query 25778: 2853.501972 from(952.174600,3+) intensity(29710.4375) rtinseconds(2485) scans(6723) index(24166)

Title: 111019\_Est\_MI\_YS\_G\_05Spectrum5835\_scans\_\_6723

Data file C:\mascot\20140703\_Tmgf\_1D\CSV\_UseAnalysis\MasterCSV\All\_Glyco\mgf\ptm\UC18ERLIC\_PTM\_35D.mgf

Click mouse within plot area to zoom in by factor of two about that point

Or, to Da

Label all possible matches Label matches used for scoring

Show Y-axis

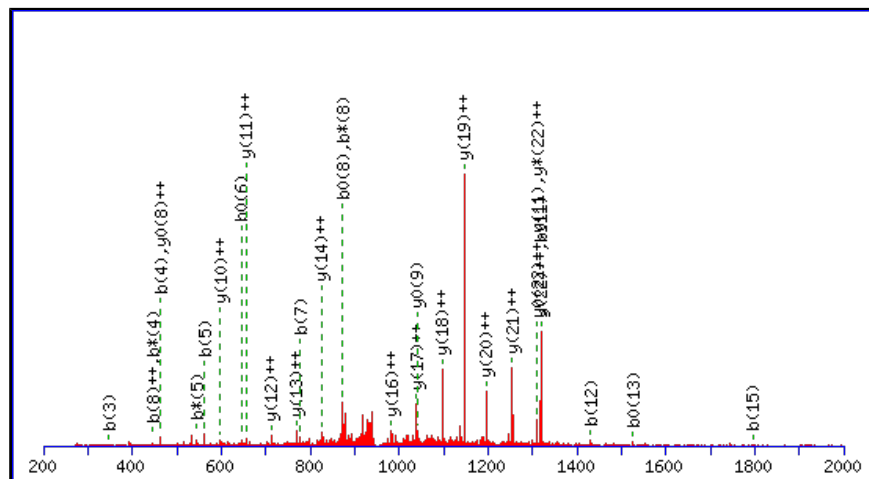

Monoisotopic mass of neutral peptide Mr(calc): 2853.4912

Fixed modifications: Carbamidomethyl (C) (apply to specified residues or termini only)

Variable modifications:

N4 : Deamidated (NQ)

Ions Score: 56 Expect: 0.00035

Matches : 31/260 fragment ions using 53 most intense peaks ([help](#))

| #  | b                | b <sup>++</sup> | b <sup>*</sup>  | b <sup>*++</sup> | b <sup>0</sup>   | b <sup>0++</sup> | Seq. | y                | y <sup>++</sup>  | y <sup>*</sup> | y <sup>*++</sup> | y <sup>0</sup>   | y <sup>0++</sup> | #  |
|----|------------------|-----------------|-----------------|------------------|------------------|------------------|------|------------------|------------------|----------------|------------------|------------------|------------------|----|
| 1  | 72.0444          | 36.5258         |                 |                  |                  |                  | A    |                  |                  |                |                  |                  |                  | 24 |
| 2  | 219.1128         | 110.0600        |                 |                  |                  |                  | F    | 2783.4614        | 1392.2343        | 2766.4349      | 1383.7211        | 2765.4509        | 1383.2291        | 23 |
| 3  | <b>348.1554</b>  | 174.5813        |                 |                  | 330.1448         | 165.5761         | E    | 2636.3930        | <b>1318.7001</b> | 2619.3665      | <b>1310.1869</b> | 2618.3824        | <b>1309.6949</b> | 22 |
| 4  | <b>463.1823</b>  | 232.0948        | <b>446.1558</b> | 223.5815         | 445.1718         | 223.0895         | N    | 2507.3504        | <b>1254.1788</b> | 2490.3239      | 1245.6656        | 2489.3398        | 1245.1736        | 21 |
| 5  | <b>562.2508</b>  | 281.6290        | <b>545.2242</b> | 273.1157         | 544.2402         | 272.6237         | V    | 2392.3235        | <b>1196.6654</b> | 2375.2969      | 1188.1521        | 2374.3129        | 1187.6601        | 20 |
| 6  | 663.2984         | 332.1529        | 646.2719        | 323.6396         | <b>645.2879</b>  | 323.1476         | T    | 2293.2551        | <b>1147.1312</b> | 2276.2285      | 1138.6179        | 2275.2445        | 1138.1259        | 19 |
| 7  | <b>778.3254</b>  | 389.6663        | 761.2988        | 381.1531         | 760.3148         | 380.6610         | D    | 2192.2074        | <b>1096.6073</b> | 2175.1808      | 1088.0941        | 2174.1968        | 1087.6020        | 18 |
| 8  | 891.4094         | <b>446.2084</b> | <b>874.3829</b> | 437.6951         | <b>873.3989</b>  | 437.2031         | L    | 2077.1804        | <b>1039.0939</b> | 2060.1539      | 1030.5806        | 2059.1699        | 1030.0886        | 17 |
| 9  | 1019.4680        | 510.2376        | 1002.4415       | 501.7244         | 1001.4575        | 501.2324         | Q    | 1964.0964        | <b>982.5518</b>  | 1947.0698      | 974.0385         | 1946.0858        | 973.5465         | 16 |
| 10 | 1205.5473        | 603.2773        | 1188.5208       | 594.7640         | 1187.5368        | 594.2720         | W    | 1836.0378        | 918.5225         | 1819.0112      | 910.0093         | 1818.0272        | 909.5173         | 15 |
| 11 | <b>1318.6314</b> | 659.8193        | 1301.6048       | 651.3061         | 1300.6208        | 650.8141         | L    | 1649.9585        | <b>825.4829</b>  | 1632.9319      | 816.9696         | 1631.9479        | 816.4776         | 14 |
| 12 | <b>1431.7155</b> | 716.3614        | 1414.6889       | 707.8481         | 1413.7049        | 707.3561         | I    | 1536.8744        | <b>768.9408</b>  | 1519.8479      | 760.4276         | 1518.8639        | 759.9356         | 13 |
| 13 | 1544.7995        | 772.9034        | 1527.7730       | 764.3901         | <b>1526.7890</b> | 763.8981         | L    | 1423.7904        | <b>712.3988</b>  | 1406.7638      | 703.8855         | 1405.7798        | 703.3935         | 12 |
| 14 | 1659.8265        | 830.4169        | 1642.7999       | 821.9036         | 1641.8159        | 821.4116         | D    | <b>1310.7063</b> | <b>655.8568</b>  | 1293.6797      | 647.3435         | 1292.6957        | 646.8515         | 11 |
| 15 | <b>1796.8854</b> | 898.9463        | 1779.8588       | 890.4331         | 1778.8748        | 889.9410         | H    | 1195.6793        | <b>598.3433</b>  | 1178.6528      | 589.8300         | 1177.6688        | 589.3380         | 10 |
| 16 | 1910.9283        | 955.9678        | 1893.9018       | 947.4545         | 1892.9177        | 946.9625         | N    | 1058.6204        | 529.8139         | 1041.5939      | 521.3006         | <b>1040.6099</b> | 520.8086         | 9  |
| 17 | 2024.0124        | 1012.5098       | 2006.9858       | 1003.9965        | 2006.0018        | 1003.5045        | L    | 944.5775         | 472.7924         | 927.5510       | 464.2791         | 926.5669         | <b>463.7871</b>  | 8  |
| 18 | 2137.0964        | 1069.0519       | 2120.0699       | 1060.5386        | 2119.0859        | 1060.0466        | L    | 831.4934         | 416.2504         | 814.4669       | 407.7371         | 813.4829         | 407.2451         | 7  |
| 19 | 2266.1390        | 1133.5732       | 2249.1125       | 1125.0599        | 2248.1285        | 1124.5679        | E    | 718.4094         | 359.7083         | 701.3828       | 351.1951         | 700.3988         | 350.7030         | 6  |
| 20 | 2380.1820        | 1190.5946       | 2363.1554       | 1182.0813        | 2362.1714        | 1181.5893        | N    | 589.3668         | 295.1870         | 572.3402       | 286.6738         | 571.3562         | 286.1817         | 5  |
| 21 | 2467.2140        | 1234.1106       | 2450.1874       | 1225.5974        | 2449.2034        | 1225.1053        | S    | 475.3239         | 238.1656         | 458.2973       | 229.6523         | 457.3133         | 229.1603         | 4  |
| 22 | 2595.3089        | 1298.1581       | 2578.2824       | 1289.6448        | 2577.2984        | 1289.1528        | K    | 388.2918         | 194.6496         | 371.2653       | 186.1363         |                  |                  | 3  |
| 23 | 2708.3930        | 1354.7001       | 2691.3665       | 1346.1869        | 2690.3824        | 1345.6949        | I    | 260.1969         | 130.6021         | 243.1703       | 122.0888         |                  |                  | 2  |



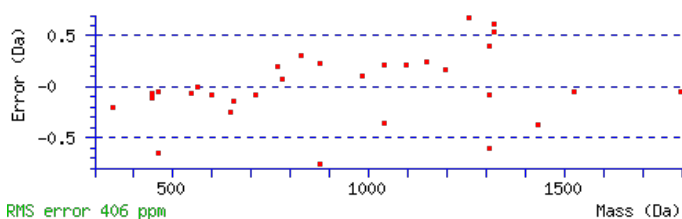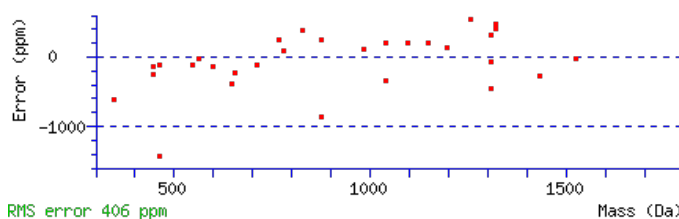

NCBI **BLAST** search of [AFENVTDLQWLILDHNLENSKIK](#)  
 (Parameters: blastp, nr protein database, expect=20000, no filter, PAM30)  
 Other BLAST [web gateways](#)

**All matches to this query**

| Score | Mr(calc)  | Delta   | Sequence                                     | Site Analysis        |
|-------|-----------|---------|----------------------------------------------|----------------------|
| 56.1  | 2853.4912 | 0.0108  | <a href="#">AFENVTDLQWLILDHNLENSKIK</a>      | Deamidated N4 66.98% |
| 52.0  | 2853.4912 | 0.0108  | <a href="#">AFENVTDLQWLILDHNLENSKIK</a>      | Deamidated Q9 26.00% |
| 43.3  | 2853.4912 | 0.0108  | <a href="#">AFENVTDLQWLILDHNLENSKIK</a>      | Deamidated N16 3.52% |
| 43.3  | 2853.4912 | 0.0108  | <a href="#">AFENVTDLQWLILDHNLENSKIK</a>      | Deamidated N20 3.50% |
| 33.3  | 2852.5072 | 0.9948  | <a href="#">AFENVTDLQWLILDHNLENSKIK</a>      |                      |
| 9.8   | 2853.5124 | -0.0104 | <a href="#">IRYTTDPQLNIIYSTVKGVTLSQK</a>     |                      |
| 7.2   | 2851.4823 | 2.0196  | <a href="#">GSSAGNIMPTTYISVTPKIGMGKPAITK</a> |                      |
| 7.1   | 2851.4868 | 2.0151  | <a href="#">WQLLTGSLASTSPSLLSGOGPWAPLQR</a>  |                      |
| 6.7   | 2853.5124 | -0.0104 | <a href="#">IRYTTDPQLNIIYSTVKGVTLSQK</a>     |                      |
| 6.7   | 2853.5124 | -0.0104 | <a href="#">IRYTTDPQLNIIYSTVKGVTLSQK</a>     |                      |

**Mascot:** <http://www.matrixscience.com/>

# MASCOT SCIENCE Mascot Search Results

## Peptide View

MS/MS Fragmentation of **NDFHRNLTTSLTESVDR**

Found in **P80108** in **con\_Xuniprot\_HUMAN3**, PHLD\_HUMAN Phosphatidylinositol-glycan-specific phospholipase D OS=Homo sapiens GN=GPLD1 PE=1 SV=3

Match to Query 12245: 2004.958362 from(669.326730,3+) intensity(82866.1094) rtinseconds(1077) scans(2520) index(1941)

Title: 111019\_Est\_ISCardio\_NMI\_YP\_G\_4Spectrum2137\_scans\_\_2520

Data file C:\\mascot\\20140703\_Tmgf\_1D\\CSV\_UseAnalysis\\MasterCSV\\All\_Glyco\\mgf\\ptm\\UC18ERLIC\_PTM\_35D.mgf

Click mouse within plot area to zoom in by factor of two about that point

Or, to Da

Label all possible matches Label matches used for scoring

Show Y-axis

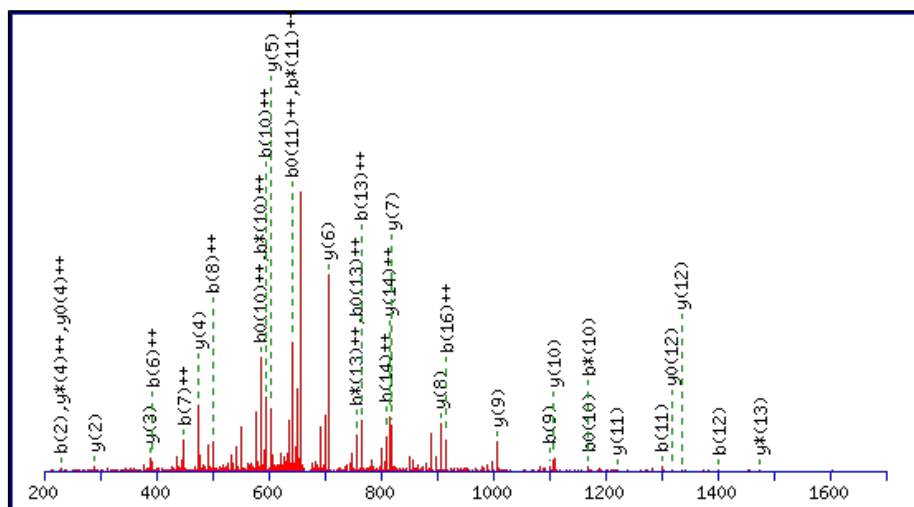

Monoisotopic mass of neutral peptide Mr(calc): 2004.9501

Fixed modifications: Carbamidomethyl (C) (apply to specified residues or termini only)

Variable modifications:

N6 : Deamidated (NQ)

Ions Score: 81 Expect: 1.9e-006

Matches : 35/188 fragment ions using 40 most intense peaks ([help](#))

| #  | b                | b <sup>++</sup> | b <sup>*</sup>   | b <sup>***</sup> | b <sup>0</sup>   | b <sup>0++</sup> | Seq. | y                | y <sup>++</sup> | y <sup>*</sup>   | y <sup>***</sup> | y <sup>0</sup>   | y <sup>0++</sup> | #  |
|----|------------------|-----------------|------------------|------------------|------------------|------------------|------|------------------|-----------------|------------------|------------------|------------------|------------------|----|
| 1  | 115.0502         | 58.0287         | 98.0237          | 49.5155          |                  |                  | N    |                  |                 |                  |                  |                  |                  | 17 |
| 2  | <b>230.0771</b>  | 115.5422        | 213.0506         | 107.0289         | 212.0666         | 106.5369         | D    | 1891.9144        | 946.4609        | 1874.8879        | 937.9476         | 1873.9039        | 937.4556         | 16 |
| 3  | 377.1456         | 189.0764        | 360.1190         | 180.5631         | 359.1350         | 180.0711         | F    | 1776.8875        | 888.9474        | 1759.8610        | 880.4341         | 1758.8769        | 879.9421         | 15 |
| 4  | 514.2045         | 257.6059        | 497.1779         | 249.0926         | 496.1939         | 248.6006         | H    | 1629.8191        | <b>815.4132</b> | 1612.7925        | 806.8999         | 1611.8085        | 806.4079         | 14 |
| 5  | 670.3056         | 335.6564        | 653.2790         | 327.1432         | 652.2950         | 326.6511         | R    | 1492.7602        | 746.8837        | <b>1475.7336</b> | 738.3705         | 1474.7496        | 737.8784         | 13 |
| 6  | 785.3325         | <b>393.1699</b> | 768.3060         | 384.6566         | 767.3220         | 384.1646         | N    | <b>1336.6591</b> | 668.8332        | 1319.6325        | 660.3199         | <b>1318.6485</b> | 659.8279         | 12 |
| 7  | 898.4166         | <b>449.7119</b> | 881.3900         | 441.1987         | 880.4060         | 440.7067         | L    | <b>1221.6321</b> | 611.3197        | 1204.6056        | 602.8064         | 1203.6216        | 602.3144         | 11 |
| 8  | 999.4643         | <b>500.2358</b> | 982.4377         | 491.7225         | 981.4537         | 491.2305         | T    | <b>1108.5481</b> | 554.7777        | 1091.5215        | 546.2644         | 1090.5375        | 545.7724         | 10 |
| 9  | <b>1100.5119</b> | 550.7596        | 1083.4854        | 542.2463         | 1082.5014        | 541.7543         | T    | <b>1007.5004</b> | 504.2538        | 990.4738         | 495.7406         | 989.4898         | 495.2485         | 9  |
| 10 | 1187.5440        | <b>594.2756</b> | <b>1170.5174</b> | <b>585.7624</b>  | <b>1169.5334</b> | <b>585.2703</b>  | S    | <b>906.4527</b>  | 453.7300        | 889.4262         | 445.2167         | 888.4421         | 444.7247         | 8  |
| 11 | <b>1300.6280</b> | 650.8177        | 1283.6015        | <b>642.3044</b>  | 1282.6175        | <b>641.8124</b>  | L    | <b>819.4207</b>  | 410.2140        | 802.3941         | 401.7007         | 801.4101         | 401.2087         | 7  |
| 12 | <b>1401.6757</b> | 701.3415        | 1384.6492        | 692.8282         | 1383.6652        | 692.3362         | T    | <b>706.3366</b>  | 353.6719        | 689.3101         | 345.1587         | 688.3260         | 344.6667         | 6  |
| 13 | 1530.7183        | <b>765.8628</b> | 1513.6918        | <b>757.3495</b>  | 1512.7077        | <b>756.8575</b>  | E    | <b>605.2889</b>  | 303.1481        | 588.2624         | 294.6348         | 587.2784         | 294.1428         | 5  |
| 14 | 1617.7503        | <b>809.3788</b> | 1600.7238        | 800.8655         | 1599.7398        | 800.3735         | S    | <b>476.2463</b>  | 238.6268        | 459.2198         | <b>230.1135</b>  | 458.2358         | <b>229.6215</b>  | 4  |
| 15 | 1716.8188        | 858.9130        | 1699.7922        | 850.3997         | 1698.8082        | 849.9077         | V    | <b>389.2143</b>  | 195.1108        | 372.1878         | 186.5975         | 371.2037         | 186.1055         | 3  |
| 16 | 1831.8457        | <b>916.4265</b> | 1814.8191        | 907.9132         | 1813.8351        | 907.4212         | D    | <b>290.1459</b>  | 145.5766        | 273.1193         | 137.0633         | 272.1353         | 136.5713         | 2  |
| 17 |                  |                 |                  |                  |                  |                  | R    | 175.1190         | 88.0631         | 158.0924         | 79.5498          |                  |                  | 1  |

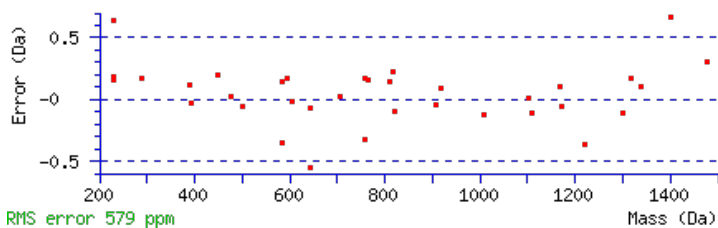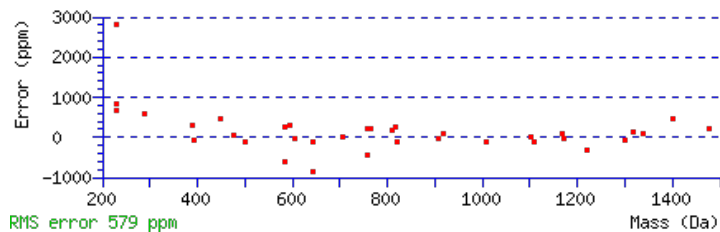

NCBI **BLAST** search of [NDFHRNLTTSLTESVDR](#)

(Parameters: blastp, nr protein database, expect=20000, no filter, PAM30)

Other BLAST [web gateways](#)

**All matches to this query**

| Score | Mr(calc)  | Delta  | Sequence                            | Site Analysis        |
|-------|-----------|--------|-------------------------------------|----------------------|
| 81.0  | 2004.9501 | 0.0083 | <a href="#">NDFHRNLTTSLTESVDR</a>   | Deamidated N6 95.29% |
| 67.9  | 2004.9501 | 0.0083 | <a href="#">NDFHRNLTTSLTESVDR</a>   | Deamidated N1 4.71%  |
| 12.4  | 2003.9595 | 0.9988 | <a href="#">EPMGNEQARARAPPPPSDR</a> |                      |
| 9.4   | 2003.9590 | 0.9993 | <a href="#">IGGNAMMKLTHLAMQQAR</a>  |                      |
| 9.4   | 2003.9590 | 0.9993 | <a href="#">IGGNAMMKLTHLAMQQAR</a>  |                      |
| 8.4   | 2004.9505 | 0.0079 | <a href="#">LAPGLKLGMYKMMMSDR</a>   |                      |
| 8.2   | 2003.9470 | 1.0114 | <a href="#">DSLMSSSFQSVKISNSGK</a>  |                      |
| 8.1   | 2003.9622 | 0.9961 | <a href="#">MQQATLPSEFAPNLSQTR</a>  |                      |
| 7.5   | 2004.9541 | 0.0043 | <a href="#">KYYPRQTNLDSYVDSR</a>    |                      |
| 7.0   | 2003.9469 | 1.0114 | <a href="#">NNKDSHSLTTNIMEILR</a>   |                      |

Mascot: <http://www.matrixscience.com/>

# MATRIX SCIENCE Mascot Search Results

## Peptide View

MS/MS Fragmentation of **LNVEAANWTVR**

Found in **P80108** in **con\_Xuniprot\_HUMAN3**, PHLD\_HUMAN Phosphatidylinositol-glycan-specific phospholipase D OS=Homo sapiens GN=GPLD1 PE=1 SV=3

Match to Query 1825: 1272.651068 from(637.332810,2+) intensity(79093.5547) rtinseconds(1340) scans(3173) index(20245)

Title: 111019\_Est\_MI\_YP\_G\_10Spectrum2763\_scans\_3173

Data file C:\\mascot\\20140703\_Tmgf\_1D\\CSV\_UseAnalysis\\MasterCSV\\All\_Glyco\\mgf\\ptm\\UC18ERLIC\_PTM\_35D.mgf

Click mouse within plot area to zoom in by factor of two about that point

Or, to Da

Label all possible matches Label matches used for scoring

Show Y-axis

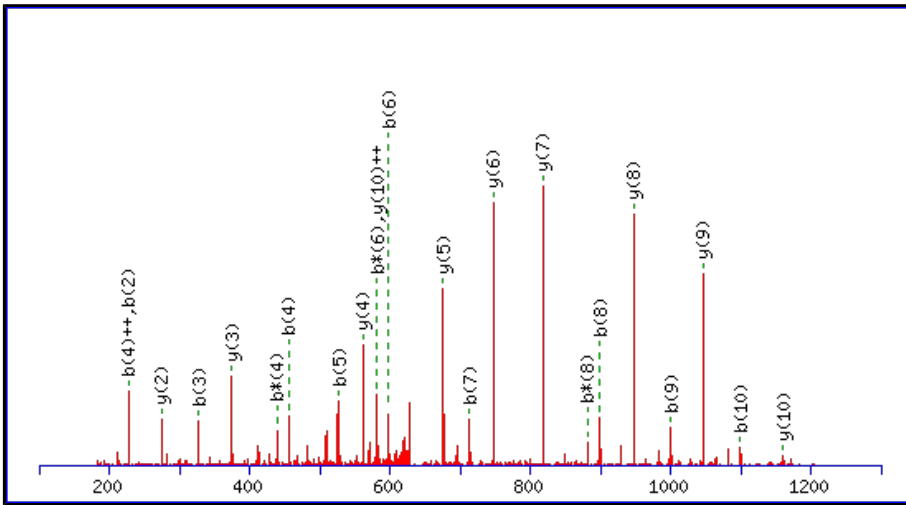

Monoisotopic mass of neutral peptide Mr(calc): 1272.6462

Fixed modifications: Carbamidomethyl (C) (apply to specified residues or termini only)

Variable modifications:

N7 : Deamidated (NQ)

Ions Score: 75 Expect: 5.9e-006

Matches : 23/108 fragment ions using 33 most intense peaks ([help](#))

| #  | b                | b <sup>++</sup> | b <sup>*</sup>  | b <sup>*++</sup> | b <sup>0</sup> | b <sup>0++</sup> | Seq. | y                | y <sup>++</sup> | y <sup>*</sup> | y <sup>*++</sup> | y <sup>0</sup> | y <sup>0++</sup> | #  |
|----|------------------|-----------------|-----------------|------------------|----------------|------------------|------|------------------|-----------------|----------------|------------------|----------------|------------------|----|
| 1  | 114.0913         | 57.5493         |                 |                  |                |                  | L    |                  |                 |                |                  |                |                  | 11 |
| 2  | <b>228.1343</b>  | 114.5708        | 211.1077        | 106.0575         |                |                  | N    | <b>1160.5695</b> | <b>580.7884</b> | 1143.5429      | 572.2751         | 1142.5589      | 571.7831         | 10 |
| 3  | <b>327.2027</b>  | 164.1050        | 310.1761        | 155.5917         |                |                  | V    | <b>1046.5265</b> | 523.7669        | 1029.5000      | 515.2536         | 1028.5160      | 514.7616         | 9  |
| 4  | <b>456.2453</b>  | <b>228.6263</b> | <b>439.2187</b> | 220.1130         | 438.2347       | 219.6210         | E    | <b>947.4581</b>  | 474.2327        | 930.4316       | 465.7194         | 929.4476       | 465.2274         | 8  |
| 5  | <b>527.2824</b>  | 264.1448        | 510.2558        | 255.6316         | 509.2718       | 255.1395         | A    | <b>818.4155</b>  | 409.7114        | 801.3890       | 401.1981         | 800.4050       | 400.7061         | 7  |
| 6  | <b>598.3195</b>  | 299.6634        | <b>581.2930</b> | 291.1501         | 580.3089       | 290.6581         | A    | <b>747.3784</b>  | 374.1928        | 730.3519       | 365.6796         | 729.3679       | 365.1876         | 6  |
| 7  | <b>713.3464</b>  | 357.1769        | 696.3199        | 348.6636         | 695.3359       | 348.1716         | N    | <b>676.3413</b>  | 338.6743        | 659.3148       | 330.1610         | 658.3307       | 329.6690         | 5  |
| 8  | <b>899.4258</b>  | 450.2165        | <b>882.3992</b> | 441.7032         | 881.4152       | 441.2112         | W    | <b>561.3144</b>  | 281.1608        | 544.2878       | 272.6475         | 543.3038       | 272.1555         | 4  |
| 9  | <b>1000.4734</b> | 500.7404        | 983.4469        | 492.2271         | 982.4629       | 491.7351         | T    | <b>375.2350</b>  | 188.1212        | 358.2085       | 179.6079         | 357.2245       | 179.1159         | 3  |
| 10 | <b>1099.5419</b> | 550.2746        | 1082.5153       | 541.7613         | 1081.5313      | 541.2693         | V    | <b>274.1874</b>  | 137.5973        | 257.1608       | 129.0840         |                |                  | 2  |
| 11 |                  |                 |                 |                  |                |                  | R    | 175.1190         | 88.0631         | 158.0924       | 79.5498          |                |                  | 1  |

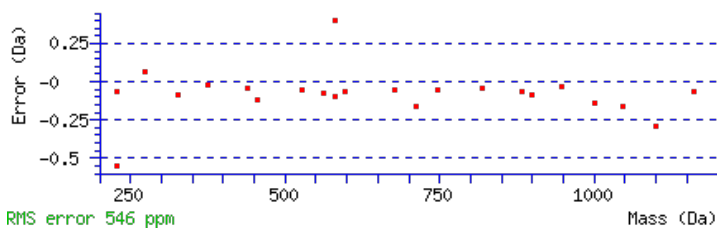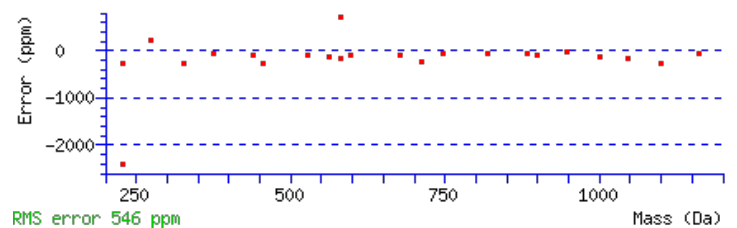

NCBI BLAST search of [LNVEAANWTVR](#)

(Parameters: blastp, nr protein database, expect=20000, no filter, PAM30)

Other BLAST [web gateways](#)

**All matches to this query**

| Score | Mr(calc)  | Delta   | Sequence                      | Site Analysis         |
|-------|-----------|---------|-------------------------------|-----------------------|
| 75.2  | 1272.6462 | 0.0048  | <a href="#">LNVEAANWTVR</a>   | Deamidated N7 100.00% |
| 20.7  | 1272.6462 | 0.0048  | <a href="#">LNVEAANWTVR</a>   | Deamidated N2 0.00%   |
| 19.2  | 1272.6574 | -0.0064 | <a href="#">NNKVAWNLASR</a>   |                       |
| 12.2  | 1272.6536 | -0.0026 | <a href="#">GLGMTLSYLER</a>   |                       |
| 12.2  | 1272.6575 | -0.0064 | <a href="#">LINPNHTHAVR</a>   |                       |
| 8.3   | 1272.6561 | -0.0051 | <a href="#">QVLDGKEEVEK</a>   |                       |
| 8.3   | 1272.6561 | -0.0051 | <a href="#">QVQVEGLSGNIK</a>  |                       |
| 5.0   | 1272.6463 | 0.0048  | <a href="#">PEVWVSSNTVR</a>   |                       |
| 3.5   | 1272.6462 | 0.0048  | <a href="#">GPSLTAPFAEAGR</a> |                       |
| 3.5   | 1272.6496 | 0.0015  | <a href="#">IGDLGAVQAAAMR</a> |                       |

**Mascot:** <http://www.matrixscience.com/>

# MASCOT SCIENCE Mascot Search Results

## Peptide View

MS/MS Fragmentation of **LGTSLSGGHVLNMGTLK**

Found in **P80108** in **con\_Xuniprot\_HUMAN3**, PHLD\_HUMAN Phosphatidylinositol-glycan-specific phospholipase D OS=Homo sapiens GN=GPLD1 PE=1 SV=3

Match to Query 8715: 1714.898948 from(858.456750,2+) intensity(37311.8594) rtinseconds(1203) scans(2851) index(9403)

Title: 111019\_Est\_ISCardio\_NMI\_YS\_G\_5Spectrum2422\_scans\_\_2851

Data file C:\\mascot\\20140703\_Tmgf\_1D\\CSV\_UseAnalysis\\MasterCSV\\All\_Glyco\\mgf\\ptm\\UC18ERLIC\_PTM\_35D.mgf

Click mouse within plot area to zoom in by factor of two about that point

Or, to Da

Label all possible matches Label matches used for scoring

Show Y-axis

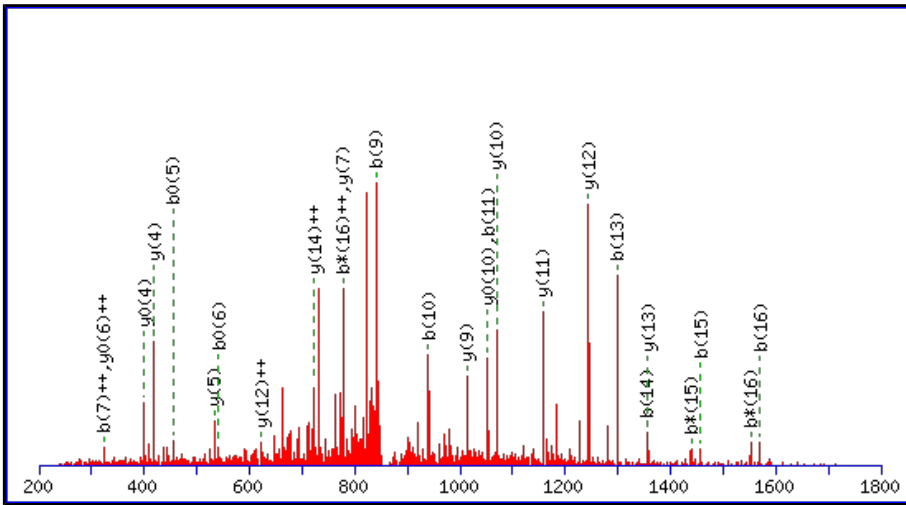

Monoisotopic mass of neutral peptide Mr(calc): 1714.8924

Fixed modifications: Carbamidomethyl (C) (apply to specified residues or termini only)

Variable modifications:

N13 : Deamidated (NQ)

Ions Score: 74 Expect: 9.7e-006

Matches : 26/160 fragment ions using 30 most intense peaks ([help](#))

| #  | b         | b <sup>++</sup> | b <sup>*</sup> | b <sup>***</sup> | b <sup>0</sup> | b <sup>0++</sup> | Seq. | y         | y <sup>++</sup> | y <sup>*</sup> | y <sup>***</sup> | y <sup>0</sup> | y <sup>0++</sup> | #  |
|----|-----------|-----------------|----------------|------------------|----------------|------------------|------|-----------|-----------------|----------------|------------------|----------------|------------------|----|
| 1  | 114.0913  | 57.5493         |                |                  |                |                  | L    |           |                 |                |                  |                |                  | 17 |
| 2  | 171.1128  | 86.0600         |                |                  |                |                  | G    | 1602.8156 | 801.9114        | 1585.7890      | 793.3982         | 1584.8050      | 792.9061         | 16 |
| 3  | 272.1605  | 136.5839        |                |                  | 254.1499       | 127.5786         | T    | 1545.7941 | 773.4007        | 1528.7676      | 764.8874         | 1527.7836      | 764.3954         | 15 |
| 4  | 359.1925  | 180.0999        |                |                  | 341.1819       | 171.0946         | S    | 1444.7464 | 722.8769        | 1427.7199      | 714.3636         | 1426.7359      | 713.8716         | 14 |
| 5  | 472.2766  | 236.6419        |                |                  | 454.2660       | 227.6366         | L    | 1357.7144 | 679.3608        | 1340.6879      | 670.8476         | 1339.7038      | 670.3556         | 13 |
| 6  | 559.3086  | 280.1579        |                |                  | 541.2980       | 271.1527         | S    | 1244.6303 | 622.8188        | 1227.6038      | 614.3055         | 1226.6198      | 613.8135         | 12 |
| 7  | 646.3406  | 323.6740        |                |                  | 628.3301       | 314.6687         | S    | 1157.5983 | 579.3028        | 1140.5718      | 570.7895         | 1139.5878      | 570.2975         | 11 |
| 8  | 703.3621  | 352.1847        |                |                  | 685.3515       | 343.1794         | G    | 1070.5663 | 535.7868        | 1053.5397      | 527.2735         | 1052.5557      | 526.7815         | 10 |
| 9  | 840.4210  | 420.7141        |                |                  | 822.4104       | 411.7089         | H    | 1013.5448 | 507.2761        | 996.5183       | 498.7628         | 995.5343       | 498.2708         | 9  |
| 10 | 939.4894  | 470.2483        |                |                  | 921.4789       | 461.2431         | V    | 876.4859  | 438.7466        | 859.4594       | 430.2333         | 858.4754       | 429.7413         | 8  |
| 11 | 1052.5735 | 526.7904        |                |                  | 1034.5629      | 517.7851         | L    | 777.4175  | 389.2124        | 760.3910       | 380.6991         | 759.4069       | 380.2071         | 7  |
| 12 | 1183.6140 | 592.3106        |                |                  | 1165.6034      | 583.3053         | M    | 664.3334  | 332.6704        | 647.3069       | 324.1571         | 646.3229       | 323.6651         | 6  |
| 13 | 1298.6409 | 649.8241        | 1281.6144      | 641.3108         | 1280.6303      | 640.8188         | N    | 533.2930  | 267.1501        | 516.2664       | 258.6368         | 515.2824       | 258.1448         | 5  |
| 14 | 1355.6624 | 678.3348        | 1338.6358      | 669.8216         | 1337.6518      | 669.3295         | G    | 418.2660  | 209.6366        | 401.2395       | 201.1234         | 400.2554       | 200.6314         | 4  |
| 15 | 1456.7101 | 728.8587        | 1439.6835      | 720.3454         | 1438.6995      | 719.8534         | T    | 361.2445  | 181.1259        | 344.2180       | 172.6126         | 343.2340       | 172.1206         | 3  |
| 16 | 1569.7941 | 785.4007        | 1552.7676      | 776.8874         | 1551.7836      | 776.3954         | L    | 260.1969  | 130.6021        | 243.1703       | 122.0888         |                |                  | 2  |
| 17 |           |                 |                |                  |                |                  | K    | 147.1128  | 74.0600         | 130.0863       | 65.5468          |                |                  | 1  |

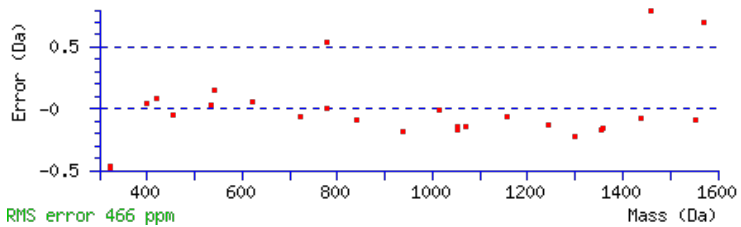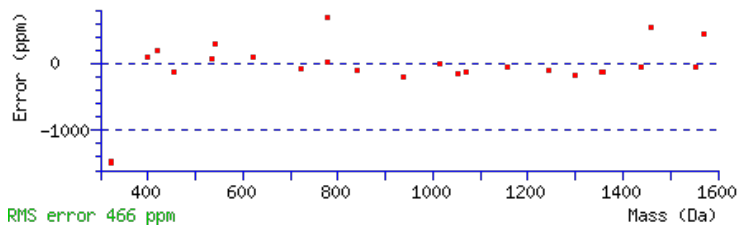

NCBI **BLAST** search of [LGTSLSGGHVLMMNGTLK](#)  
 (Parameters: blastp, nr protein database, expect=20000, no filter, PAM30)  
 Other BLAST [web gateways](#)

**All matches to this query**

| Score | Mr(calc)  | Delta   | Sequence                           |
|-------|-----------|---------|------------------------------------|
| 73.8  | 1714.8924 | 0.0066  | <a href="#">LGTSLSGGHVLMMNGTLK</a> |
| 6.3   | 1714.9035 | -0.0046 | <a href="#">MAQLAEKARALEQEK</a>    |
| 6.2   | 1713.8971 | 1.0019  | <a href="#">KETIELQIPEKMQGA</a>    |
| 5.4   | 1714.8923 | 0.0066  | <a href="#">ECKNLQVQIDVLQK</a>     |
| 4.0   | 1713.8906 | 1.0084  | <a href="#">SPGRLSDMLLICPQK</a>    |
| 3.0   | 1714.8988 | 0.0001  | <a href="#">LQQKVDELNKEIQK</a>     |
| 2.9   | 1714.8988 | 0.0001  | <a href="#">LQQKVDELNKEIQK</a>     |
| 2.9   | 1714.8988 | 0.0001  | <a href="#">LQQKVDELNKEIQK</a>     |
| 2.9   | 1714.8932 | 0.0057  | <a href="#">HVSCGMMEALLKVIK</a>    |
| 2.5   | 1714.8989 | 0.0001  | <a href="#">GGTNGILVLDEELSGLK</a>  |

Mascot: <http://www.matrixscience.com/>



# MATRIX SCIENCE Mascot Search Results

## Peptide View

MS/MS Fragmentation of **TLLLVGSPTWKNASR**

Found in **P80108** in **con\_Xuniprot\_HUMAN3**, PHLD\_HUMAN Phosphatidylinositol-glycan-specific phospholipase D OS=Homo sapiens GN=GPLD1 PE=1 SV=3

Match to Query 8397: 1642.908102 from(548.643310,3+) intensity(107643.9219) rtinseconds(1420) scans(3219) index(8859)

Title: 111019\_Est\_ISCardio\_NMI\_YS\_G\_4Spectrum2728\_scans\_\_3219

Data file C:\\mascot\\20140703\_Tmgf\_1D\\CSV\_UseAnalysis\\MasterCSV\\All\_Glyco\\mgf\\ptm\\UC18ERLIC\_PTM\_35D.mgf

Click mouse within plot area to zoom in by factor of two about that point

Or, to Da

Label all possible matches Label matches used for scoring

Show Y-axis

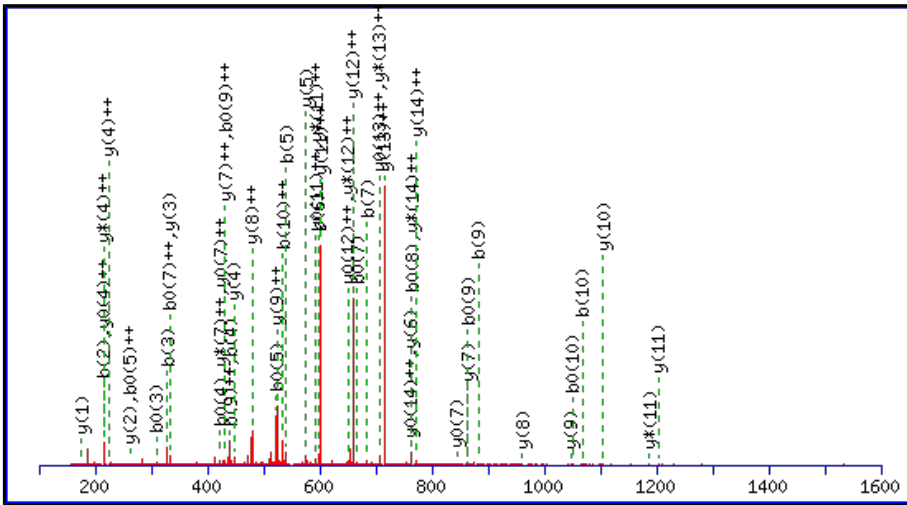

Monoisotopic mass of neutral peptide Mr(calc): 1642.9042

Fixed modifications: Carbamidomethyl (C) (apply to specified residues or termini only)

Variable modifications:

N12 : Deamidated (NQ)

Ions Score: 68 Expect: 2.4e-005

Matches : 53/146 fragment ions using 77 most intense peaks ([help](#))

| #  | b                | b <sup>++</sup> | b <sup>*</sup> | b <sup>*++</sup> | b <sup>0</sup>   | b <sup>0++</sup> | Seq. | y                | y <sup>++</sup> | y <sup>*</sup>   | y <sup>*++</sup> | y <sup>0</sup>  | y <sup>0++</sup> | #  |
|----|------------------|-----------------|----------------|------------------|------------------|------------------|------|------------------|-----------------|------------------|------------------|-----------------|------------------|----|
| 1  | 102.0550         | 51.5311         |                |                  | 84.0444          | 42.5258          | T    |                  |                 |                  |                  |                 |                  | 15 |
| 2  | <b>215.1390</b>  | 108.0731        |                |                  | 197.1285         | 99.0679          | L    | 1542.8639        | <b>771.9356</b> | 1525.8373        | <b>763.4223</b>  | 1524.8533       | <b>762.9303</b>  | 14 |
| 3  | <b>328.2231</b>  | 164.6152        |                |                  | <b>310.2125</b>  | 155.6099         | L    | 1429.7798        | <b>715.3935</b> | 1412.7532        | <b>706.8803</b>  | 1411.7692       | <b>706.3883</b>  | 13 |
| 4  | <b>441.3071</b>  | 221.1572        |                |                  | <b>423.2966</b>  | 212.1519         | L    | 1316.6957        | <b>658.8515</b> | 1299.6692        | <b>650.3382</b>  | 1298.6852       | <b>649.8462</b>  | 12 |
| 5  | <b>540.3756</b>  | 270.6914        |                |                  | <b>522.3650</b>  | 261.6861         | V    | <b>1203.6117</b> | 602.3095        | <b>1186.5851</b> | <b>593.7962</b>  | 1185.6011       | <b>593.3042</b>  | 11 |
| 6  | <b>597.3970</b>  | 299.2022        |                |                  | 579.3865         | 290.1969         | G    | <b>1104.5432</b> | 552.7753        | 1087.5167        | 544.2620         | 1086.5327       | 543.7700         | 10 |
| 7  | <b>684.4291</b>  | 342.7182        |                |                  | <b>666.4185</b>  | 333.7129         | S    | <b>1047.5218</b> | <b>524.2645</b> | 1030.4952        | 515.7513         | 1029.5112       | 515.2592         | 9  |
| 8  | 781.4818         | 391.2445        |                |                  | <b>763.4713</b>  | 382.2393         | P    | <b>960.4898</b>  | <b>480.7485</b> | 943.4632         | 472.2352         | 942.4792        | 471.7432         | 8  |
| 9  | <b>882.5295</b>  | <b>441.7684</b> |                |                  | <b>864.5189</b>  | 432.7631         | T    | <b>863.4370</b>  | 432.2221        | 846.4104         | <b>423.7089</b>  | <b>845.4264</b> | <b>423.2169</b>  | 7  |
| 10 | <b>1068.6088</b> | <b>534.8080</b> |                |                  | <b>1050.5982</b> | 525.8028         | W    | <b>762.3893</b>  | 381.6983        | 745.3628         | 373.1850         | 744.3787        | 372.6930         | 6  |
| 11 | 1196.7038        | 598.8555        | 1179.6772      | 590.3422         | 1178.6932        | 589.8502         | K    | <b>576.3100</b>  | 288.6586        | 559.2835         | 280.1454         | 558.2994        | 279.6534         | 5  |
| 12 | 1311.7307        | 656.3690        | 1294.7042      | 647.8557         | 1293.7202        | 647.3637         | N    | <b>448.2150</b>  | <b>224.6112</b> | 431.1885         | <b>216.0979</b>  | 430.2045        | <b>215.6059</b>  | 4  |
| 13 | 1382.7678        | 691.8876        | 1365.7413      | 683.3743         | 1364.7573        | 682.8823         | A    | <b>333.1881</b>  | 167.0977        | 316.1615         | 158.5844         | 315.1775        | 158.0924         | 3  |
| 14 | 1469.7999        | 735.4036        | 1452.7733      | 726.8903         | 1451.7893        | 726.3983         | S    | <b>262.1510</b>  | 131.5791        | 245.1244         | 123.0659         | 244.1404        | 122.5738         | 2  |
| 15 |                  |                 |                |                  |                  |                  | R    | <b>175.1190</b>  | 88.0631         | 158.0924         | 79.5498          |                 |                  | 1  |

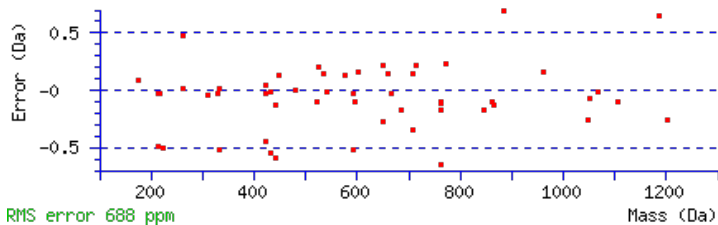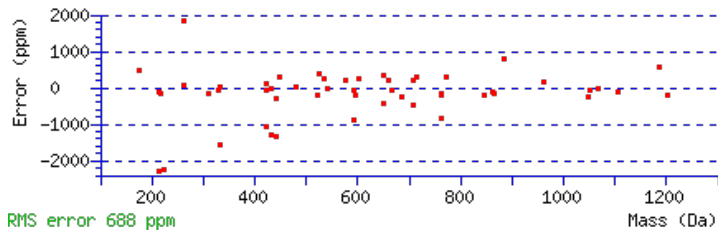

NCBI **BLAST** search of [TLLLVGSPTWKNASR](#)

(Parameters: blastp, nr protein database, expect=20000, no filter, PAM30)

Other BLAST [web gateways](#)

**All matches to this query**

| Score | Mr(calc)  | Delta   | Sequence                        |
|-------|-----------|---------|---------------------------------|
| 67.9  | 1642.9042 | 0.0039  | <a href="#">TLLLVGSPTWKNASR</a> |
| 12.7  | 1642.9155 | -0.0074 | <a href="#">WQVGAQTVLALSISR</a> |
| 9.9   | 1641.9049 | 1.0032  | <a href="#">VDELIAKLVNRRTR</a>  |
| 9.2   | 1641.9090 | 0.9991  | <a href="#">DVLLELVEHHLTPK</a>  |
| 8.8   | 1642.9141 | -0.0060 | <a href="#">ITLLELKEQQTIGR</a>  |
| 8.7   | 1641.9090 | 0.9991  | <a href="#">TLAQFPNTLLGNPKK</a> |
| 6.8   | 1640.9072 | 2.0009  | <a href="#">VVKLEEVLFHLGR</a>   |
| 6.1   | 1642.9141 | -0.0060 | <a href="#">VIDNLVSNLEASIKK</a> |
| 5.2   | 1642.9155 | -0.0074 | <a href="#">IVEKWASDLRLTGR</a>  |
| 5.0   | 1642.9128 | -0.0047 | <a href="#">GASLVKNQHIRQHR</a>  |

Mascot: <http://www.matrixscience.com/>

# MASCOT SCIENCE Mascot Search Results

## Peptide View

MS/MS Fragmentation of **EKLNVEAANWTVR**

Found in **P80108** in **con\_Xuniprot\_HUMAN3**, PHLD\_HUMAN Phosphatidylinositol-glycan-specific phospholipase D OS=Homo sapiens GN=GPLD1 PE=1 SV=3

Match to Query 6907: 1529.786592 from(510.936140,3+) intensity(29084.5020) rtinseconds(1048) scans(2483) index(2570)

Title: 111019\_Est\_ISCardio\_NMI\_YP\_G\_5Spectrum2105\_scans\_\_2483

Data file C:\\mascot\\20140703\_Tmgf\_1D\\CSV\_UseAnalysis\\MasterCSV\\All\_Glyco\\mgf\\ptm\\UC18ERLIC\_PTM\_35D.mgf

Click mouse within plot area to zoom in by factor of two about that point

Or, to Da

Label all possible matches Label matches used for scoring

Show Y-axis

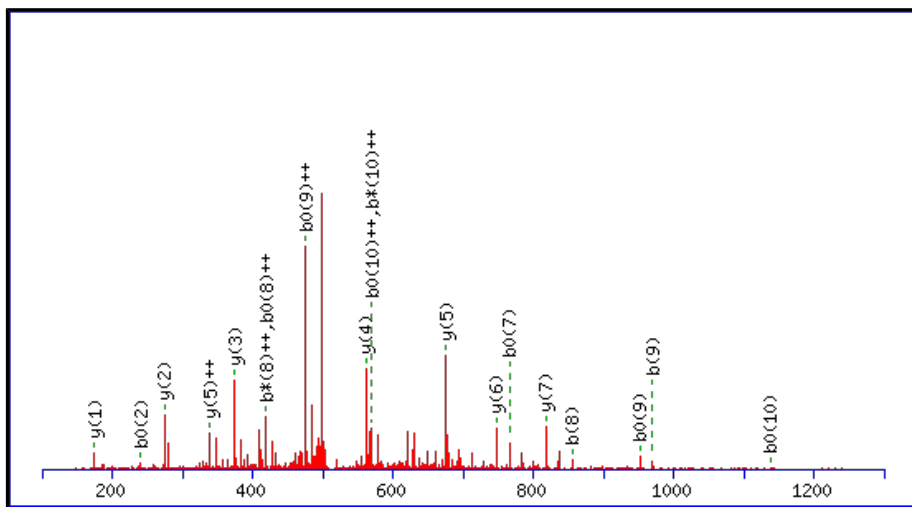

Monoisotopic mass of neutral peptide Mr(calc): 1529.7838

Fixed modifications: Carbamidomethyl (C) (apply to specified residues or termini only)

Variable modifications:

N9 : Deamidated (NQ)

Ions Score: 49 Expect: 0.0029

Matches : 19/138 fragment ions using 22 most intense peaks ([help](#))

| #  | b         | b <sup>++</sup> | b <sup>*</sup> | b <sup>+++</sup> | b <sup>0</sup> | b <sup>0++</sup> | Seq. | y         | y <sup>++</sup> | y <sup>*</sup> | y <sup>+++</sup> | y <sup>0</sup> | y <sup>0++</sup> | #  |
|----|-----------|-----------------|----------------|------------------|----------------|------------------|------|-----------|-----------------|----------------|------------------|----------------|------------------|----|
| 1  | 130.0499  | 65.5286         |                |                  | 112.0393       | 56.5233          | E    |           |                 |                |                  |                |                  | 13 |
| 2  | 258.1448  | 129.5761        | 241.1183       | 121.0628         | 240.1343       | 120.5708         | K    | 1401.7485 | 701.3779        | 1384.7219      | 692.8646         | 1383.7379      | 692.3726         | 12 |
| 3  | 371.2289  | 186.1181        | 354.2023       | 177.6048         | 353.2183       | 177.1128         | L    | 1273.6535 | 637.3304        | 1256.6270      | 628.8171         | 1255.6430      | 628.3251         | 11 |
| 4  | 485.2718  | 243.1395        | 468.2453       | 234.6263         | 467.2613       | 234.1343         | N    | 1160.5695 | 580.7884        | 1143.5429      | 572.2751         | 1142.5589      | 571.7831         | 10 |
| 5  | 584.3402  | 292.6738        | 567.3137       | 284.1605         | 566.3297       | 283.6685         | V    | 1046.5265 | 523.7669        | 1029.5000      | 515.2536         | 1028.5160      | 514.7616         | 9  |
| 6  | 713.3828  | 357.1951        | 696.3563       | 348.6818         | 695.3723       | 348.1898         | E    | 947.4581  | 474.2327        | 930.4316       | 465.7194         | 929.4476       | 465.2274         | 8  |
| 7  | 784.4199  | 392.7136        | 767.3934       | 384.2003         | 766.4094       | 383.7083         | A    | 818.4155  | 409.7114        | 801.3890       | 401.1981         | 800.4050       | 400.7061         | 7  |
| 8  | 855.4571  | 428.2322        | 838.4305       | 419.7189         | 837.4465       | 419.2269         | A    | 747.3784  | 374.1928        | 730.3519       | 365.6796         | 729.3678       | 365.1876         | 6  |
| 9  | 970.4840  | 485.7456        | 953.4575       | 477.2324         | 952.4734       | 476.7404         | N    | 676.3413  | 338.6743        | 659.3148       | 330.1610         | 658.3307       | 329.6690         | 5  |
| 10 | 1156.5633 | 578.7853        | 1139.5368      | 570.2720         | 1138.5527      | 569.7800         | W    | 561.3144  | 281.1608        | 544.2878       | 272.6475         | 543.3038       | 272.1555         | 4  |
| 11 | 1257.6110 | 629.3091        | 1240.5844      | 620.7959         | 1239.6004      | 620.3039         | T    | 375.2350  | 188.1212        | 358.2085       | 179.6079         | 357.2245       | 179.1159         | 3  |
| 12 | 1356.6794 | 678.8433        | 1339.6529      | 670.3301         | 1338.6688      | 669.8381         | V    | 274.1874  | 137.5973        | 257.1608       | 129.0840         |                |                  | 2  |
| 13 |           |                 |                |                  |                |                  | R    | 175.1190  | 88.0631         | 158.0924       | 79.5498          |                |                  | 1  |

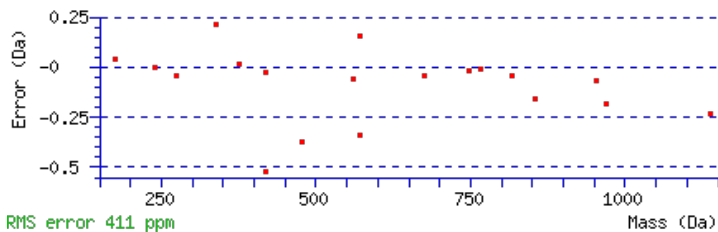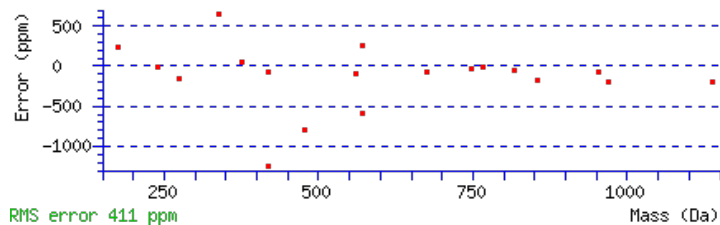

NCBI **BLAST** search of [EKLNVEAANWTVR](#)

(Parameters: blastp, nr protein database, expect=20000, no filter, PAM30)

Other BLAST [web gateways](#)

**All matches to this query**

| Score | Mr(calc)  | Delta  | Sequence                        | Site Analysis        |
|-------|-----------|--------|---------------------------------|----------------------|
| 49.0  | 1529.7838 | 0.0028 | <a href="#">EKLNVEAANWTVR</a>   | Deamidated N9 99.78% |
| 22.4  | 1529.7838 | 0.0028 | <a href="#">EKLNVEAANWTVR</a>   | Deamidated N4 0.22%  |
| 20.0  | 1527.7762 | 2.0104 | <a href="#">MNGHVGKLD RMVR</a>  |                      |
| 17.7  | 1528.7820 | 1.0046 | <a href="#">NVSL LWAAPGQAMR</a> |                      |
| 10.2  | 1529.7838 | 0.0028 | <a href="#">IERFNPPSNVTVR</a>   |                      |
| 7.8   | 1528.7773 | 1.0093 | <a href="#">EDF TSLSLVLYSR</a>  |                      |
| 6.2   | 1528.7780 | 1.0086 | <a href="#">INMASDSRHTLLR</a>   |                      |
| 6.2   | 1528.7780 | 1.0086 | <a href="#">LNMASDSRHTLLR</a>   |                      |
| 5.7   | 1527.7728 | 2.0138 | <a href="#">ARSNMSRYLQFR</a>    |                      |
| 5.0   | 1527.7827 | 2.0039 | <a href="#">ISSGRMNLIQHVR</a>   |                      |

Mascot: <http://www.matrixscience.com/>

# MASCOT SCIENCE Mascot Search Results

## Peptide View

MS/MS Fragmentation of **GEEDFSWFGYSLHGVTVDNR**

Found in **P80108** in **con\_Xuniprot\_HUMAN3**, PHLD\_HUMAN Phosphatidylinositol-glycan-specific phospholipase D OS=Homo sapiens GN=GPLD1 PE=1 SV=3

Match to Query 15425: 2315.018862 from(772.680230,3+) intensity(20896.7305) rtinseconds(2249) scans(5576) index(26220)

Title: 111019\_Est\_MI\_YS\_G\_08Spectrum4836\_scans\_5576

Data file C:\mascot\20140703\_Tmgf\_1D\CSV\_UseAnalysis\MasterCSV\All\_Glyco\mgf\ptm\UC18ERLIC\_PTM\_35D.mgf

Click mouse within plot area to zoom in by factor of two about that point

Or, to Da

Label all possible matches Label matches used for scoring

Show Y-axis

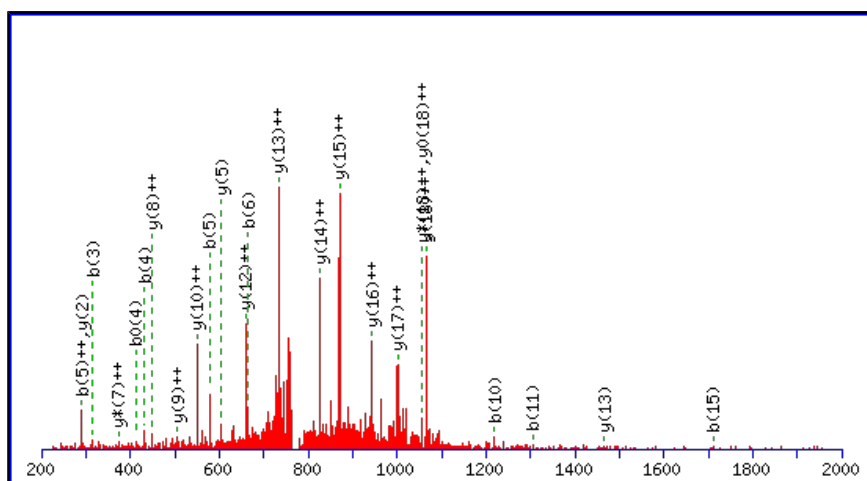

Monoisotopic mass of neutral peptide Mr(calc): 2315.0131

Fixed modifications: Carbamidomethyl (C) (apply to specified residues or termini only)

Variable modifications:

N19 : Deamidated (NQ)

Ions Score: 46 Expect: 0.0029

Matches : 25/186 fragment ions using 54 most intense peaks ([help](#))

| #  | b                | b <sup>++</sup> | b <sup>*</sup> | b <sup>***</sup> | b <sup>0</sup>  | b <sup>0++</sup> | Seq. | y                | y <sup>++</sup>  | y <sup>*</sup> | y <sup>***</sup> | y <sup>0</sup> | y <sup>0++</sup> | #  |
|----|------------------|-----------------|----------------|------------------|-----------------|------------------|------|------------------|------------------|----------------|------------------|----------------|------------------|----|
| 1  | 58.0287          | 29.5180         |                |                  |                 |                  | G    |                  |                  |                |                  |                |                  | 20 |
| 2  | 187.0713         | 94.0393         |                |                  | 169.0608        | 85.0340          | E    | 2258.9989        | 1130.0031        | 2241.9724      | 1121.4898        | 2240.9883      | 1120.9978        | 19 |
| 3  | <b>316.1139</b>  | 158.5606        |                |                  | 298.1034        | 149.5553         | E    | 2129.9563        | <b>1065.4818</b> | 2112.9298      | <b>1056.9685</b> | 2111.9457      | <b>1056.4765</b> | 18 |
| 4  | <b>431.1409</b>  | 216.0741        |                |                  | <b>413.1303</b> | 207.0688         | D    | 2000.9137        | <b>1000.9605</b> | 1983.8872      | 992.4472         | 1982.9032      | 991.9552         | 17 |
| 5  | <b>578.2093</b>  | <b>289.6083</b> |                |                  | 560.1987        | 280.6030         | F    | 1885.8868        | <b>943.4470</b>  | 1868.8602      | 934.9338         | 1867.8762      | 934.4417         | 16 |
| 6  | <b>665.2413</b>  | 333.1243        |                |                  | 647.2307        | 324.1190         | S    | 1738.8184        | <b>869.9128</b>  | 1721.7918      | 861.3995         | 1720.8078      | 860.9075         | 15 |
| 7  | 851.3206         | 426.1640        |                |                  | 833.3101        | 417.1587         | W    | 1651.7863        | <b>826.3968</b>  | 1634.7598      | 817.8835         | 1633.7758      | 817.3915         | 14 |
| 8  | 998.3890         | 499.6982        |                |                  | 980.3785        | 490.6929         | F    | <b>1465.7070</b> | <b>733.3571</b>  | 1448.6805      | 724.8439         | 1447.6965      | 724.3519         | 13 |
| 9  | 1055.4105        | 528.2089        |                |                  | 1037.3999       | 519.2036         | G    | 1318.6386        | <b>659.8229</b>  | 1301.6121      | 651.3097         | 1300.6280      | 650.8177         | 12 |
| 10 | <b>1218.4738</b> | 609.7406        |                |                  | 1200.4633       | 600.7353         | Y    | 1261.6171        | 631.3122         | 1244.5906      | 622.7989         | 1243.6066      | 622.3069         | 11 |
| 11 | <b>1305.5059</b> | 653.2566        |                |                  | 1287.4953       | 644.2513         | S    | 1098.5538        | <b>549.7805</b>  | 1081.5273      | 541.2673         | 1080.5432      | 540.7753         | 10 |
| 12 | 1418.5899        | 709.7986        |                |                  | 1400.5794       | 700.7933         | L    | 1011.5218        | <b>506.2645</b>  | 994.4952       | 497.7513         | 993.5112       | 497.2592         | 9  |
| 13 | 1555.6488        | 778.3281        |                |                  | 1537.6383       | 769.3228         | H    | 898.4377         | <b>449.7225</b>  | 881.4112       | 441.2092         | 880.4272       | 440.7172         | 8  |
| 14 | 1612.6703        | 806.8388        |                |                  | 1594.6597       | 797.8335         | G    | 761.3788         | 381.1930         | 744.3523       | <b>372.6798</b>  | 743.3682       | 372.1878         | 7  |
| 15 | <b>1711.7387</b> | 856.3730        |                |                  | 1693.7281       | 847.3677         | V    | 704.3573         | 352.6823         | 687.3308       | 344.1690         | 686.3468       | 343.6770         | 6  |
| 16 | 1812.7864        | 906.8968        |                |                  | 1794.7758       | 897.8916         | T    | <b>605.2889</b>  | 303.1481         | 588.2624       | 294.6348         | 587.2784       | 294.1428         | 5  |
| 17 | 1911.8548        | 956.4310        |                |                  | 1893.8442       | 947.4258         | V    | 504.2413         | 252.6243         | 487.2147       | 244.1110         | 486.2307       | 243.6190         | 4  |
| 18 | 2026.8817        | 1013.9445       |                |                  | 2008.8712       | 1004.9392        | D    | 405.1728         | 203.0901         | 388.1463       | 194.5768         | 387.1623       | 194.0848         | 3  |
| 19 | 2141.9087        | 1071.4580       | 2124.8821      | 1062.9447        | 2123.8981       | 1062.4527        | N    | <b>290.1459</b>  | 145.5766         | 273.1193       | 137.0633         |                |                  | 2  |
| 20 |                  |                 |                |                  |                 |                  | R    | 175.1190         | 88.0631          | 158.0924       | 79.5498          |                |                  | 1  |

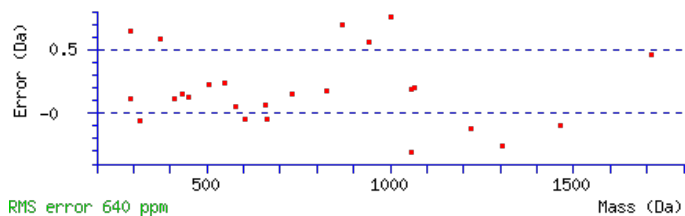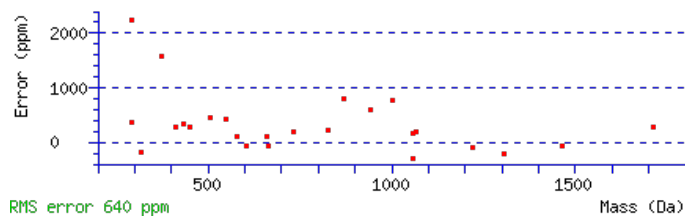

NCBI **BLAST** search of [GEEDEFSWFGYSLHGVTVDNR](#)  
 (Parameters: blastp, nr protein database, expect=20000, no filter, PAM30)  
 Other BLAST [web gateways](#)

**All matches to this query**

| Score | Mr(calc)  | Delta  | Sequence                                |
|-------|-----------|--------|-----------------------------------------|
| 45.6  | 2315.0131 | 0.0058 | <a href="#">GEEDEFSWFGYSLHGVTVDNR</a>   |
| 1.8   | 2314.0127 | 1.0062 | <a href="#">QEEVSMSSQMGCQALNQLLK</a>    |
| 0.3   | 2313.0067 | 2.0122 | <a href="#">VSQDMGVVEGQSIEPSGSFSAQR</a> |

**Mascot:** <http://www.matrixscience.com/>

# MASCOT SCIENCE Mascot Search Results

## Peptide View

MS/MS Fragmentation of **LGTSLSGGHVLMMNGTLK**

Found in **P80108** in **con\_Xuniprot\_HUMAN3**, PHLD\_HUMAN Phosphatidylinositol-glycan-specific phospholipase D OS=Homo sapiens GN=GPLD1 PE=1 SV=3

Match to Query 8787: 1730.895348 from(866.454950,2+) intensity(33774.7813) rtinseconds(871) scans(2130) index(23829)

Title: 111019\_Est\_MI\_YS\_G\_05Spectrum1808\_scans\_2130

Data file C:\mascot\20140703\_Tmgf\_1D\CSV\_UseAnalysis\MasterCSV\All\_Glyco\mgf\ptm\UC18ERLIC\_PTM\_35D.mgf

Click mouse within plot area to zoom in by factor of two about that point

Or, to Da

Label all possible matches Label matches used for scoring

Show Y-axis

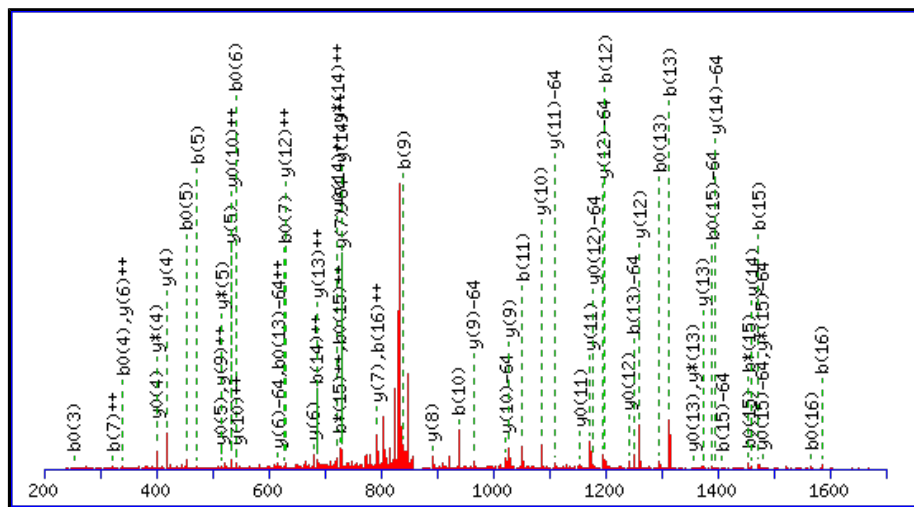

Monoisotopic mass of neutral peptide Mr(calc): 1730.8873

Fixed modifications: Carbamidomethyl (C) (apply to specified residues or termini only)

Variable modifications:

M12 : Oxidation (M), with neutral losses 0.0000(shown in table), 63.9983

N13 : Deamidated (NQ)

Ions Score: 45 Expect: 0.007

Matches : 64/254 fragment ions using 129 most intense peaks ([help](#))

| #  | b         | b <sup>++</sup> | b*        | b <sup>***</sup> | b <sup>0</sup> | b <sup>0++</sup> | Seq. | y         | y <sup>++</sup> | y*        | y <sup>***</sup> | y <sup>0</sup> | y <sup>0++</sup> | #  |
|----|-----------|-----------------|-----------|------------------|----------------|------------------|------|-----------|-----------------|-----------|------------------|----------------|------------------|----|
| 1  | 114.0913  | 57.5493         |           |                  |                |                  | L    |           |                 |           |                  |                |                  | 17 |
| 2  | 171.1128  | 86.0600         |           |                  |                |                  | G    | 1618.8105 | 809.9089        | 1601.7840 | 801.3956         | 1600.7999      | 800.9036         | 16 |
| 3  | 272.1605  | 136.5839        |           |                  | 254.1499       | 127.5786         | T    | 1561.7890 | 781.3982        | 1544.7625 | 772.8849         | 1543.7785      | 772.3929         | 15 |
| 4  | 359.1925  | 180.0999        |           |                  | 341.1819       | 171.0946         | S    | 1460.7414 | 730.8743        | 1443.7148 | 722.3610         | 1442.7308      | 721.8690         | 14 |
| 5  | 472.2766  | 236.6419        |           |                  | 454.2660       | 227.6366         | L    | 1373.7093 | 687.3583        | 1356.6828 | 678.8450         | 1355.6988      | 678.3530         | 13 |
| 6  | 559.3086  | 280.1579        |           |                  | 541.2980       | 271.1527         | S    | 1260.6253 | 630.8163        | 1243.5987 | 622.3030         | 1242.6147      | 621.8110         | 12 |
| 7  | 646.3406  | 323.6740        |           |                  | 628.3301       | 314.6687         | S    | 1173.5932 | 587.3003        | 1156.5667 | 578.7870         | 1155.5827      | 578.2950         | 11 |
| 8  | 703.3621  | 352.1847        |           |                  | 685.3515       | 343.1794         | G    | 1086.5612 | 543.7842        | 1069.5347 | 535.2710         | 1068.5506      | 534.7790         | 10 |
| 9  | 840.4210  | 420.7141        |           |                  | 822.4104       | 411.7089         | H    | 1029.5397 | 515.2735        | 1012.5132 | 506.7602         | 1011.5292      | 506.2682         | 9  |
| 10 | 939.4894  | 470.2483        |           |                  | 921.4789       | 461.2431         | V    | 892.4808  | 446.7441        | 875.4543  | 438.2308         | 874.4703       | 437.7388         | 8  |
| 11 | 1052.5735 | 526.7904        |           |                  | 1034.5629      | 517.7851         | L    | 793.4124  | 397.2098        | 776.3859  | 388.6966         | 775.4019       | 388.2046         | 7  |
| 12 | 1199.6089 | 600.3081        |           |                  | 1181.5983      | 591.3028         | M    | 680.3284  | 340.6678        | 663.3018  | 332.1545         | 662.3178       | 331.6625         | 6  |
| 13 | 1314.6358 | 657.8216        | 1297.6093 | 649.3083         | 1296.6253      | 648.8163         | N    | 533.2930  | 267.1501        | 516.2664  | 258.6368         | 515.2824       | 258.1448         | 5  |
| 14 | 1371.6573 | 686.3323        | 1354.6307 | 677.8190         | 1353.6467      | 677.3270         | G    | 418.2660  | 209.6366        | 401.2395  | 201.1234         | 400.2554       | 200.6314         | 4  |
| 15 | 1472.7050 | 736.8561        | 1455.6784 | 728.3428         | 1454.6944      | 727.8508         | T    | 361.2445  | 181.1259        | 344.2180  | 172.6126         | 343.2340       | 172.1206         | 3  |
| 16 | 1585.7890 | 793.3982        | 1568.7625 | 784.8849         | 1567.7785      | 784.3929         | L    | 260.1969  | 130.6021        | 243.1703  | 122.0888         |                |                  | 2  |
| 17 |           |                 |           |                  |                |                  | K    | 147.1128  | 74.0600         | 130.0863  | 65.5468          |                |                  | 1  |



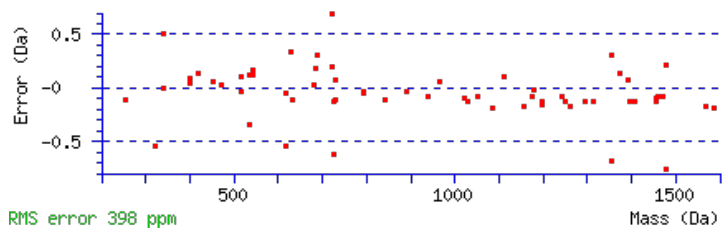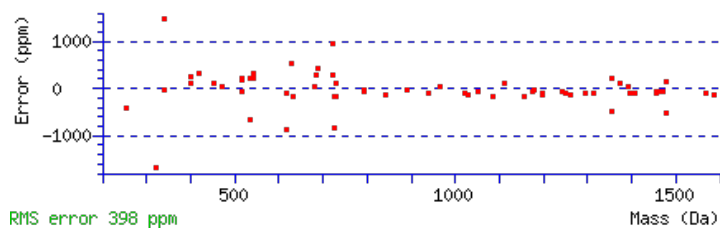

NCBI **BLAST** search of [LGTSLSGGHVL MNGTLK](#)

(Parameters: blastp, nr protein database, expect=20000, no filter, PAM30)

Other BLAST [web gateways](#)

**All matches to this query**

| Score | Mr(calc)  | Delta  | Sequence                           |
|-------|-----------|--------|------------------------------------|
| 45.3  | 1730.8873 | 0.0081 | <a href="#">LGTSLSGGHVL MNGTLK</a> |
| 10.9  | 1730.8873 | 0.0081 | <a href="#">LTGNMLVHGSSLSTGLK</a>  |
| 3.2   | 1730.8913 | 0.0041 | <a href="#">MEKYYNLIKESGLK</a>     |
| 3.0   | 1730.8888 | 0.0066 | <a href="#">ENVN MNLFVVEKMK</a>    |
| 3.0   | 1730.8888 | 0.0066 | <a href="#">ENVN MNLFVVEKMK</a>    |
| 3.0   | 1730.8888 | 0.0066 | <a href="#">ENVN MNLFVVEKMK</a>    |
| 1.1   | 1728.8869 | 2.0085 | <a href="#">QFGGMLLAYSGVQSKK</a>   |
| 0.6   | 1730.8913 | 0.0040 | <a href="#">YNGVIVGDPNLM PVVK</a>  |

Mascot: <http://www.matrixscience.com/>

# MATRIX SCIENCE Mascot Search Results

## Peptide View

MS/MS Fragmentation of **FHDVSESTHWTPFLNASVHYIR**

Found in **P80108** in **con\_Xuniprot\_HUMAN3**, PHLD\_HUMAN Phosphatidylinositol-glycan-specific phospholipase D OS=Homo sapiens GN=GPLD1 PE=1 SV=3

Match to Query 22379: 2643.257016 from(661.821530,4+) intensity(18459.5449) rtinseconds(1688) scans(4268) index(1314)

Title: 111019\_Est\_ISCardio\_NMI\_YP\_G\_3Spectrum3714\_scans\_4268

Data file C:\mascot\20140703\_Tmgf\_1D\CSV\_UseAnalysis\MasterCSV\All\_Glyco\mgf\ptm\UC18ERLIC\_PTM\_35D.mgf

Click mouse within plot area to zoom in by factor of two about that point

Or, to Da

Label all possible matches Label matches used for scoring

Show Y-axis

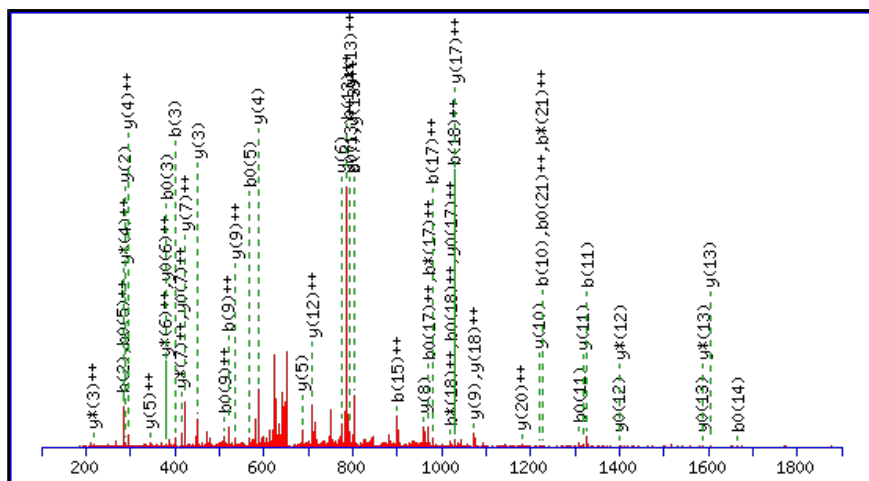

Monoisotopic mass of neutral peptide Mr(calc): 2643.2506

Fixed modifications: Carbamidomethyl (C) (apply to specified residues or termini only)

Variable modifications:

N15 : Deamidated (NQ)

Ions Score: 39 Expect: 0.029

Matches : 54/210 fragment ions using 108 most intense peaks ([help](#))

| #  | b                | b <sup>++</sup>  | b <sup>*</sup> | b <sup>*++</sup> | b <sup>0</sup>   | b <sup>0++</sup> | Seq. | y                | y <sup>++</sup>  | y <sup>*</sup>   | y <sup>*++</sup> | y <sup>0</sup>   | y <sup>0++</sup> | #  |
|----|------------------|------------------|----------------|------------------|------------------|------------------|------|------------------|------------------|------------------|------------------|------------------|------------------|----|
| 1  | 148.0757         | 74.5415          |                |                  |                  |                  | F    |                  |                  |                  |                  |                  |                  | 22 |
| 2  | <b>285.1346</b>  | 143.0709         |                |                  |                  |                  | H    | 2497.1895        | 1249.0984        | 2480.1629        | 1240.5851        | 2479.1789        | 1240.0931        | 21 |
| 3  | <b>400.1615</b>  | 200.5844         |                |                  | <b>382.1510</b>  | 191.5791         | D    | 2360.1306        | <b>1180.5689</b> | 2343.1040        | 1172.0557        | 2342.1200        | 1171.5636        | 20 |
| 4  | 499.2300         | 250.1186         |                |                  | 481.2194         | 241.1133         | V    | 2245.1036        | 1123.0555        | 2228.0771        | 1114.5422        | 2227.0931        | 1114.0502        | 19 |
| 5  | 586.2620         | 293.6346         |                |                  | <b>568.2514</b>  | <b>284.6293</b>  | S    | 2146.0352        | <b>1073.5213</b> | 2129.0087        | 1065.0080        | 2128.0247        | 1064.5160        | 18 |
| 6  | 715.3046         | 358.1559         |                |                  | 697.2940         | 349.1506         | E    | 2059.0032        | <b>1030.0052</b> | 2041.9767        | 1021.4920        | 2040.9926        | <b>1021.0000</b> | 17 |
| 7  | <b>802.3366</b>  | 401.6719         |                |                  | 784.3260         | 392.6667         | S    | 1929.9606        | 965.4839         | 1912.9341        | 956.9707         | 1911.9500        | 956.4787         | 16 |
| 8  | 903.3843         | 452.1958         |                |                  | 885.3737         | 443.1905         | T    | 1842.9286        | 921.9679         | 1825.9020        | 913.4547         | 1824.9180        | 912.9626         | 15 |
| 9  | 1040.4432        | <b>520.7252</b>  |                |                  | 1022.4326        | <b>511.7200</b>  | H    | 1741.8809        | 871.4441         | 1724.8544        | 862.9308         | 1723.8703        | 862.4388         | 14 |
| 10 | <b>1226.5225</b> | 613.7649         |                |                  | 1208.5119        | 604.7596         | W    | <b>1604.8220</b> | <b>802.9146</b>  | <b>1587.7954</b> | <b>794.4014</b>  | <b>1586.8114</b> | <b>793.9094</b>  | 13 |
| 11 | <b>1327.5702</b> | 664.2887         |                |                  | <b>1309.5596</b> | 655.2835         | T    | 1418.7427        | <b>709.8750</b>  | <b>1401.7161</b> | 701.3617         | <b>1400.7321</b> | 700.8697         | 12 |
| 12 | 1424.6230        | 712.8151         |                |                  | 1406.6124        | 703.8098         | P    | <b>1317.6950</b> | 659.3511         | 1300.6684        | 650.8379         | 1299.6844        | 650.3459         | 11 |
| 13 | 1571.6914        | <b>786.3493</b>  |                |                  | 1553.6808        | 777.3440         | F    | <b>1220.6422</b> | 610.8248         | 1203.6157        | 602.3115         | 1202.6317        | 601.8195         | 10 |
| 14 | 1684.7754        | 842.8914         |                |                  | <b>1666.7649</b> | 833.8861         | L    | <b>1073.5738</b> | <b>537.2905</b>  | 1056.5473        | 528.7773         | 1055.5633        | 528.2853         | 9  |
| 15 | 1799.8024        | <b>900.4048</b>  | 1782.7758      | 891.8916         | 1781.7918        | 891.3995         | N    | <b>960.4898</b>  | 480.7485         | 943.4632         | 472.2352         | 942.4792         | 471.7432         | 8  |
| 16 | 1870.8395        | 935.9234         | 1853.8129      | 927.4101         | 1852.8289        | 926.9181         | A    | 845.4628         | <b>423.2350</b>  | 828.4363         | <b>414.7218</b>  | 827.4522         | <b>414.2298</b>  | 7  |
| 17 | 1957.8715        | <b>979.4394</b>  | 1940.8450      | <b>970.9261</b>  | 1939.8610        | <b>970.4341</b>  | S    | <b>774.4257</b>  | 387.7165         | 757.3992         | <b>379.2032</b>  | 756.4151         | <b>378.7112</b>  | 6  |
| 18 | 2056.9399        | <b>1028.9736</b> | 2039.9134      | <b>1020.4603</b> | 2038.9294        | <b>1019.9683</b> | V    | <b>687.3937</b>  | <b>344.2005</b>  | 670.3671         | 335.6872         |                  |                  | 5  |
| 19 | 2193.9988        | 1097.5031        | 2176.9723      | 1088.9898        | 2175.9883        | 1088.4978        | H    | <b>588.3253</b>  | <b>294.6663</b>  | 571.2987         | <b>286.1530</b>  |                  |                  | 4  |
| 20 | 2357.0622        | 1179.0347        | 2340.0356      | 1170.5214        | 2339.0516        | 1170.0294        | Y    | <b>451.2663</b>  | 226.1368         | 434.2398         | <b>217.6235</b>  |                  |                  | 3  |
| 21 | 2470.1462        | 1235.5768        | 2453.1197      | <b>1227.0635</b> | 2452.1357        | <b>1226.5715</b> | I    | <b>288.2030</b>  | 144.6051         | 271.1765         | 136.0919         |                  |                  | 2  |
| 22 |                  |                  |                |                  |                  |                  | R    | 175.1190         | 88.0631          | 158.0924         | 79.5498          |                  |                  | 1  |

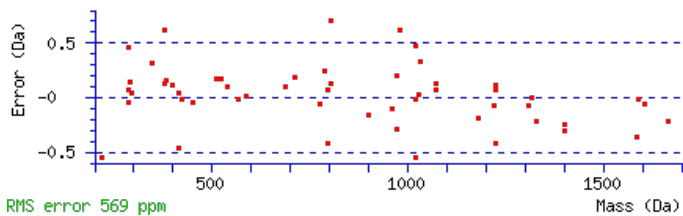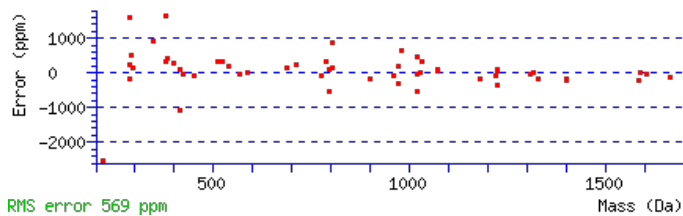

NCBI BLAST search of [FHDVSESTHWTPFLNASVHYIR](#)  
 (Parameters: blastp, nr protein database, expect=20000, no filter, PAM30)  
 Other BLAST [web gateways](#)

All matches to this query

| Score | Mr(calc)  | Delta  | Sequence                               |
|-------|-----------|--------|----------------------------------------|
| 39.4  | 2643.2506 | 0.0064 | <a href="#">FHDVSESTHWTPFLNASVHYIR</a> |
| 27.3  | 2642.2666 | 0.9904 | <a href="#">FHDVSESTHWTPFLNASVHYIR</a> |
| 9.2   | 2643.2565 | 0.0005 | <a href="#">IHEFESRLGPOQFLDEQQVANR</a> |
| 8.8   | 2643.2565 | 0.0005 | <a href="#">IHEFESRLGPOQFLDEQQVANR</a> |
| 8.2   | 2643.2565 | 0.0005 | <a href="#">IHEFESRLGPOQFLDEQQVANR</a> |
| 5.1   | 2643.2565 | 0.0005 | <a href="#">NAVQQEDLFQQPGLRSEFEHIR</a> |
| 5.1   | 2643.2565 | 0.0005 | <a href="#">NAVQQEDLFQQPGLRSEFEHIR</a> |
| 4.4   | 2643.2565 | 0.0005 | <a href="#">NAVQQEDLFQQPGLRSEFEHIR</a> |
| 4.4   | 2643.2565 | 0.0005 | <a href="#">NAVQQEDLFQQPGLRSEFEHIR</a> |
| 4.4   | 2643.2565 | 0.0005 | <a href="#">NAVQQEDLFQQPGLRSEFEHIR</a> |

Mascot: <http://www.matrixscience.com/>

# MASCOT SCIENCE Mascot Search Results

## Peptide View

MS/MS Fragmentation of **LGYNANTSILSFQAVCR**

Found in **Q02985** in **con\_Xuniprot\_HUMAN3**, FHR3\_HUMAN Complement factor H-related protein 3 OS=Homo sapiens GN=CFHR3 PE=1 SV=2

Match to Query 11543: 1913.936968 from(957.975760,2+) intensity(34843.8984) rtinseconds(1861) scans(4892) index(4497)

Title: 111019\_Est\_ISCardio\_NMI\_YP\_G\_7Spectrum4145\_scans\_\_4892

Data file C:\\mascot\\20140703\_Tmgf\_1D\\CSV\_UseAnalysis\\MasterCSV\\All\_Glyco\\mgf\\ptm\\UC18ERLIC\_PTM\_35D.mgf

Click mouse within plot area to zoom in by factor of two about that point

Or, to Da

Label all possible matches Label matches used for scoring

Show Y-axis

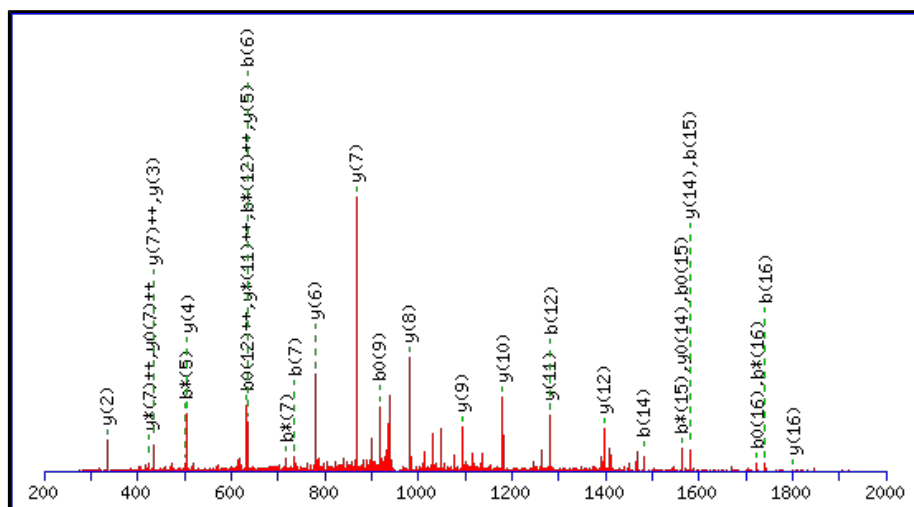

Monoisotopic mass of neutral peptide Mr(calc): 1913.9305

Fixed modifications: Carbamidomethyl (C) (apply to specified residues or termini only)

Variable modifications:

N6 : Deamidated (NQ)

Ions Score: 114 Expect: 9.4e-010

Matches : 33/162 fragment ions using 33 most intense peaks ([help](#))

| #  | b         | b <sup>++</sup> | b <sup>*</sup> | b <sup>*++</sup> | b <sup>0</sup> | b <sup>0++</sup> | Seq. | y         | y <sup>++</sup> | y <sup>*</sup> | y <sup>*++</sup> | y <sup>0</sup> | y <sup>0++</sup> | #  |
|----|-----------|-----------------|----------------|------------------|----------------|------------------|------|-----------|-----------------|----------------|------------------|----------------|------------------|----|
| 1  | 114.0913  | 57.5493         |                |                  |                |                  | L    |           |                 |                |                  |                |                  | 17 |
| 2  | 171.1128  | 86.0600         |                |                  |                |                  | G    | 1801.8538 | 901.4305        | 1784.8272      | 892.9172         | 1783.8432      | 892.4252         | 16 |
| 3  | 334.1761  | 167.5917        |                |                  |                |                  | Y    | 1744.8323 | 872.9198        | 1727.8057      | 864.4065         | 1726.8217      | 863.9145         | 15 |
| 4  | 448.2191  | 224.6132        | 431.1925       | 216.0999         |                |                  | N    | 1581.7690 | 791.3881        | 1564.7424      | 782.8748         | 1563.7584      | 782.3828         | 14 |
| 5  | 519.2562  | 260.1317        | 502.2296       | 251.6185         |                |                  | A    | 1467.7260 | 734.3667        | 1450.6995      | 725.8534         | 1449.7155      | 725.3614         | 13 |
| 6  | 634.2831  | 317.6452        | 617.2566       | 309.1319         |                |                  | N    | 1396.6889 | 698.8481        | 1379.6624      | 690.3348         | 1378.6784      | 689.8428         | 12 |
| 7  | 735.3308  | 368.1690        | 718.3042       | 359.6558         | 717.3202       | 359.1638         | T    | 1281.6620 | 641.3346        | 1264.6354      | 632.8214         | 1263.6514      | 632.3293         | 11 |
| 8  | 822.3628  | 411.6851        | 805.3363       | 403.1718         | 804.3523       | 402.6798         | S    | 1180.6143 | 590.8108        | 1163.5878      | 582.2975         | 1162.6037      | 581.8055         | 10 |
| 9  | 935.4469  | 468.2271        | 918.4203       | 459.7138         | 917.4363       | 459.2218         | I    | 1093.5823 | 547.2948        | 1076.5557      | 538.7815         | 1075.5717      | 538.2895         | 9  |
| 10 | 1048.5310 | 524.7691        | 1031.5044      | 516.2558         | 1030.5204      | 515.7638         | L    | 980.4982  | 490.7527        | 963.4717       | 482.2395         | 962.4876       | 481.7475         | 8  |
| 11 | 1135.5630 | 568.2851        | 1118.5364      | 559.7719         | 1117.5524      | 559.2798         | S    | 867.4141  | 434.2107        | 850.3876       | 425.6974         | 849.4036       | 425.2054         | 7  |
| 12 | 1282.6314 | 641.8193        | 1265.6048      | 633.3061         | 1264.6208      | 632.8141         | F    | 780.3821  | 390.6947        | 763.3556       | 382.1814         |                |                  | 6  |
| 13 | 1410.6900 | 705.8486        | 1393.6634      | 697.3353         | 1392.6794      | 696.8433         | Q    | 633.3137  | 317.1605        | 616.2872       | 308.6472         |                |                  | 5  |
| 14 | 1481.7271 | 741.3672        | 1464.7005      | 732.8539         | 1463.7165      | 732.3619         | A    | 505.2551  | 253.1312        | 488.2286       | 244.6179         |                |                  | 4  |
| 15 | 1580.7955 | 790.9014        | 1563.7690      | 782.3881         | 1562.7849      | 781.8961         | V    | 434.2180  | 217.6126        | 417.1915       | 209.0994         |                |                  | 3  |
| 16 | 1740.8261 | 870.9167        | 1723.7996      | 862.4034         | 1722.8156      | 861.9114         | C    | 335.1496  | 168.0784        | 318.1231       | 159.5652         |                |                  | 2  |
| 17 |           |                 |                |                  |                |                  | R    | 175.1190  | 88.0631         | 158.0924       | 79.5498          |                |                  | 1  |

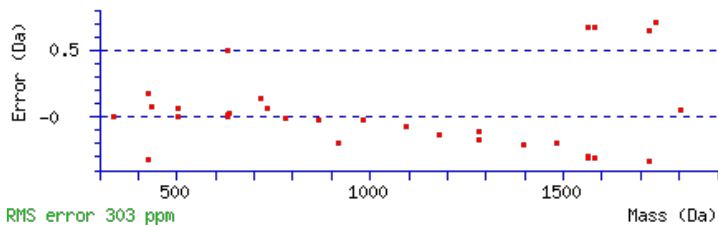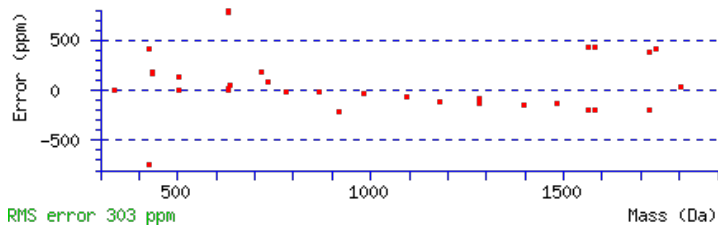

NCBI **BLAST** search of [LGYNANTSILSFQAVCR](#)

(Parameters: blastp, nr protein database, expect=20000, no filter, PAM30)

Other BLAST [web gateways](#)

**All matches to this query**

| Score | Mr(calc)  | Delta   | Sequence                           | Site Analysis        |
|-------|-----------|---------|------------------------------------|----------------------|
| 114.3 | 1913.9305 | 0.0064  | <a href="#">LGYNANTSILSFQAVCR</a>  | Deamidated N6 65.52% |
| 111.2 | 1913.9305 | 0.0064  | <a href="#">LGYNANTSILSFQAVCR</a>  | Deamidated N4 32.16% |
| 99.8  | 1913.9305 | 0.0064  | <a href="#">LGYNANTSILSFQAVCR</a>  | Deamidated Q13 2.31% |
| 9.1   | 1913.9305 | 0.0064  | <a href="#">DKGFAPNHLNVEKMALD</a>  |                      |
| 9.1   | 1913.9305 | 0.0065  | <a href="#">DKGFAPNHLNVEKMALN</a>  |                      |
| 5.5   | 1913.9305 | 0.0065  | <a href="#">DKGFAPNHLNVEKMALN</a>  |                      |
| 4.2   | 1912.9425 | 0.9945  | <a href="#">HNNGSAASGALLMRQLEK</a> |                      |
| 3.0   | 1913.9404 | -0.0035 | <a href="#">IACKSPPPEVDTPSTK</a>   |                      |
| 2.0   | 1913.9378 | -0.0008 | <a href="#">LPARLPSTSTSGSTSHCR</a> |                      |
| 1.4   | 1913.9418 | -0.0048 | <a href="#">MRFLGGFPGSSKQVSSGR</a> |                      |

Mascot: <http://www.matrixscience.com/>

# MATRIX SCIENCE Mascot Search Results

## Peptide View

MS/MS Fragmentation of **LQNNENNISCVER**

Found in **B1AKG0** in **con\_Xuniprot\_HUMAN3**, B1AKG0\_HUMAN Complement factor H-related protein 1 OS=Homo sapiens  
GN=CFHR1 PE=2 SV=1

Match to Query 7619: 1589.713948 from(795.864250,2+) intensity(108922.0703) rtinseconds(416) scans(882) index(6134)

Title: 111019\_Est\_ISCardio\_NMI\_YP\_G\_9Spectrum757\_scans\_\_882

Data file C:\\mascot\\20140703\_Tmgf\_1D\\CSV\_UseAnalysis\\MasterCSV\\All\_Glyco\\mgf\\ptm\\UC18ERLIC\_PTM\_35D.mgf

Click mouse within plot area to zoom in by factor of two about that point

Or, to Da

Label all possible matches Label matches used for scoring

Show Y-axis

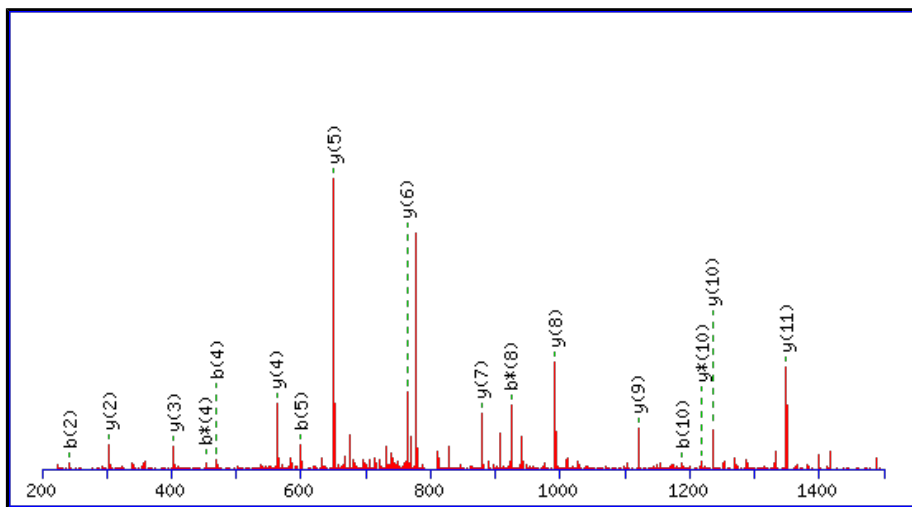

Monoisotopic mass of neutral peptide Mr(calc): 1589.7103

Fixed modifications: Carbamidomethyl (C) (apply to specified residues or termini only)

Variable modifications:

N7 : Deamidated (NQ)

Ions Score: 79 Expect: 1.3e-006

Matches : 17/132 fragment ions using 26 most intense peaks ([help](#))

| #  | b                | b <sup>++</sup> | b <sup>*</sup>  | b <sup>+++</sup> | b <sup>0</sup> | b <sup>0++</sup> | Seq. | y                | y <sup>++</sup> | y <sup>*</sup>   | y <sup>+++</sup> | y <sup>0</sup> | y <sup>0++</sup> | #  |
|----|------------------|-----------------|-----------------|------------------|----------------|------------------|------|------------------|-----------------|------------------|------------------|----------------|------------------|----|
| 1  | 114.0913         | 57.5493         |                 |                  |                |                  | L    |                  |                 |                  |                  |                |                  | 13 |
| 2  | <b>242.1499</b>  | 121.5786        | 225.1234        | 113.0653         |                |                  | Q    | 1477.6336        | 739.3204        | 1460.6070        | 730.8072         | 1459.6230      | 730.3152         | 12 |
| 3  | 356.1928         | 178.6001        | 339.1663        | 170.0868         |                |                  | N    | <b>1349.5750</b> | 675.2911        | 1332.5485        | 666.7779         | 1331.5645      | 666.2859         | 11 |
| 4  | <b>470.2358</b>  | 235.6215        | <b>453.2092</b> | 227.1082         |                |                  | N    | <b>1235.5321</b> | 618.2697        | <b>1218.5055</b> | 609.7564         | 1217.5215      | 609.2644         | 10 |
| 5  | <b>599.2784</b>  | 300.1428        | 582.2518        | 291.6295         | 581.2678       | 291.1375         | E    | <b>1121.4892</b> | 561.2482        | 1104.4626        | 552.7349         | 1103.4786      | 552.2429         | 9  |
| 6  | 713.3213         | 357.1643        | 696.2947        | 348.6510         | 695.3107       | 348.1590         | N    | <b>992.4466</b>  | 496.7269        | 975.4200         | 488.2136         | 974.4360       | 487.7216         | 8  |
| 7  | 828.3482         | 414.6778        | 811.3217        | 406.1645         | 810.3377       | 405.6725         | N    | <b>878.4036</b>  | 439.7055        | 861.3771         | 431.1922         | 860.3931       | 430.7002         | 7  |
| 8  | 941.4323         | 471.2198        | <b>924.4058</b> | 462.7065         | 923.4217       | 462.2145         | I    | <b>763.3767</b>  | 382.1920        | 746.3502         | 373.6787         | 745.3661       | 373.1867         | 6  |
| 9  | 1028.4643        | 514.7358        | 1011.4378       | 506.2225         | 1010.4538      | 505.7305         | S    | <b>650.2926</b>  | 325.6500        | 633.2661         | 317.1367         | 632.2821       | 316.6447         | 5  |
| 10 | <b>1188.4950</b> | 594.7511        | 1171.4684       | 586.2379         | 1170.4844      | 585.7458         | C    | <b>563.2606</b>  | 282.1339        | 546.2341         | 273.6207         | 545.2500       | 273.1287         | 4  |
| 11 | 1287.5634        | 644.2853        | 1270.5368       | 635.7721         | 1269.5528      | 635.2801         | V    | <b>403.2300</b>  | 202.1186        | 386.2034         | 193.6053         | 385.2194       | 193.1133         | 3  |
| 12 | 1416.6060        | 708.8066        | 1399.5794       | 700.2934         | 1398.5954      | 699.8013         | E    | <b>304.1615</b>  | 152.5844        | 287.1350         | 144.0711         | 286.1510       | 143.5791         | 2  |
| 13 |                  |                 |                 |                  |                |                  | R    | 175.1190         | 88.0631         | 158.0924         | 79.5498          |                |                  | 1  |

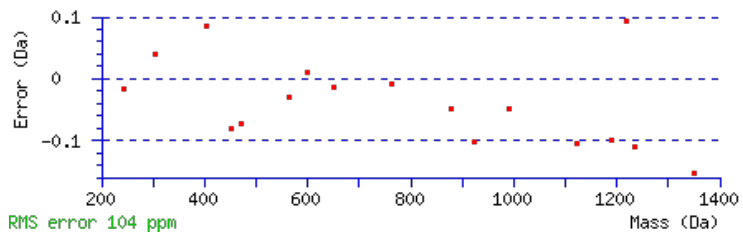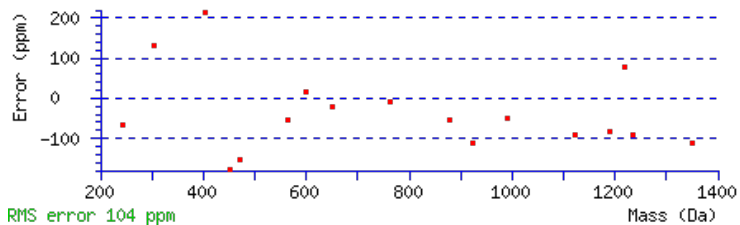

NCBI **BLAST** search of [LQNNENNISCVER](#)

(Parameters: blastp, nr protein database, expect=20000, no filter, PAM30)

Other BLAST [web gateways](#)

**All matches to this query**

| Score | Mr(calc)  | Delta   | Sequence                       | Site Analysis        |
|-------|-----------|---------|--------------------------------|----------------------|
| 78.8  | 1589.7103 | 0.0036  | <a href="#">LQNNENNISCVER</a>  | Deamidated N7 96.38% |
| 64.5  | 1589.7103 | 0.0036  | <a href="#">LQNNENNISCVER</a>  | Deamidated N6 3.56%  |
| 45.8  | 1589.7103 | 0.0036  | <a href="#">LQNNENNISCVER</a>  | Deamidated N4 0.05%  |
| 34.8  | 1589.7103 | 0.0036  | <a href="#">LQNNENNISCVER</a>  | Deamidated N3 0.00%  |
| 23.6  | 1589.7103 | 0.0036  | <a href="#">LQNNENNISCVER</a>  | Deamidated Q2 0.00%  |
| 1.7   | 1589.7216 | -0.0076 | <a href="#">GQPMGKNRTSNNQR</a> |                      |
| 0.5   | 1589.7182 | -0.0043 | <a href="#">TSSTWHNTSQER</a>   |                      |

Mascot: <http://www.matrixscience.com/>



# MASCOT SCIENCE Mascot Search Results

## Peptide View

MS/MS Fragmentation of **SPYEMFGDEEVMCLNGNWTEPPQCK**

Found in **P08603** in **con\_Xuniprot\_HUMAN3**, CFAH\_HUMAN Complement factor H OS=Homo sapiens GN=CFH PE=1 SV=4

Match to Query 27260: 3018.225702 from(1007.082510,3+) intensity(26975.1504) rtinseconds(2171) scans(5473) index(12816)

Title: 111019\_Est\_ISCardio\_NMI\_YS\_G\_9Spectrum4799\_scans\_\_5473

Data file C:\mascot\20140703\_Tmgf\_1D\CSV\_UseAnalysis\MasterCSV\All\_Glyco\mgf\ptm\UC18ERLIC\_PTM\_35D.mgf

Click mouse within plot area to zoom in by factor of two about that point

Or,  to  Da

Label all possible matches  Label matches used for scoring

Show Y-axis

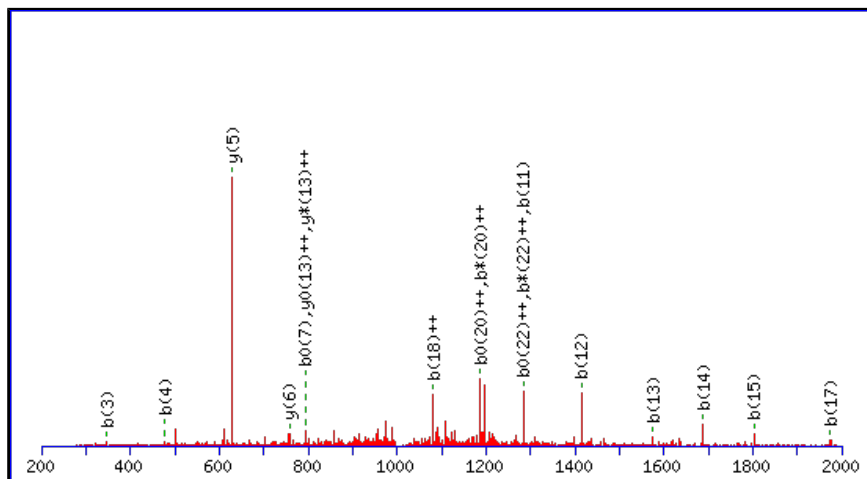

Monoisotopic mass of neutral peptide Mr(calc): 3018.2180

Fixed modifications: Carbamidomethyl (C) (apply to specified residues or termini only)

Variable modifications:

N17 : Deamidated (NQ)

Ions Score: 46 Expect: 0.00053

Matches : 18/250 fragment ions using 18 most intense peaks ([help](#))

| #  | b                | b <sup>++</sup>  | b <sup>*</sup> | b <sup>*++</sup> | b <sup>0</sup>  | b <sup>0++</sup> | Seq. | y               | y <sup>++</sup> | y <sup>*</sup> | y <sup>*++</sup> | y <sup>0</sup> | y <sup>0++</sup> | #  |
|----|------------------|------------------|----------------|------------------|-----------------|------------------|------|-----------------|-----------------|----------------|------------------|----------------|------------------|----|
| 1  | 88.0393          | 44.5233          |                |                  | 70.0287         | 35.5180          | S    |                 |                 |                |                  |                |                  | 25 |
| 2  | 185.0921         | 93.0497          |                |                  | 167.0815        | 84.0444          | P    | 2932.1933       | 1466.6003       | 2915.1667      | 1458.0870        | 2914.1827      | 1457.5950        | 24 |
| 3  | <b>348.1554</b>  | 174.5813         |                |                  | 330.1448        | 165.5761         | Y    | 2835.1405       | 1418.0739       | 2818.1140      | 1409.5606        | 2817.1299      | 1409.0686        | 23 |
| 4  | <b>477.1980</b>  | 239.1026         |                |                  | 459.1874        | 230.0974         | E    | 2672.0772       | 1336.5422       | 2655.0506      | 1328.0290        | 2654.0666      | 1327.5369        | 22 |
| 5  | 608.2385         | 304.6229         |                |                  | 590.2279        | 295.6176         | M    | 2543.0346       | 1272.0209       | 2526.0080      | 1263.5077        | 2525.0240      | 1263.0156        | 21 |
| 6  | 755.3069         | 378.1571         |                |                  | 737.2963        | 369.1518         | F    | 2411.9941       | 1206.5007       | 2394.9675      | 1197.9874        | 2393.9835      | 1197.4954        | 20 |
| 7  | 812.3284         | 406.6678         |                |                  | <b>794.3178</b> | 397.6625         | G    | 2264.9257       | 1132.9665       | 2247.8991      | 1124.4532        | 2246.9151      | 1123.9612        | 19 |
| 8  | 927.3553         | 464.1813         |                |                  | 909.3447        | 455.1760         | D    | 2207.9042       | 1104.4557       | 2190.8777      | 1095.9425        | 2189.8937      | 1095.4505        | 18 |
| 9  | 1056.3979        | 528.7026         |                |                  | 1038.3873       | 519.6973         | E    | 2092.8773       | 1046.9423       | 2075.8507      | 1038.4290        | 2074.8667      | 1037.9370        | 17 |
| 10 | 1185.4405        | 593.2239         |                |                  | 1167.4299       | 584.2186         | E    | 1963.8347       | 982.4210        | 1946.8081      | 973.9077         | 1945.8241      | 973.4157         | 16 |
| 11 | <b>1284.5089</b> | 642.7581         |                |                  | 1266.4983       | 633.7528         | V    | 1834.7921       | 917.8997        | 1817.7655      | 909.3864         | 1816.7815      | 908.8944         | 15 |
| 12 | <b>1415.5494</b> | 708.2783         |                |                  | 1397.5388       | 699.2730         | M    | 1735.7237       | 868.3655        | 1718.6971      | 859.8522         | 1717.7131      | 859.3602         | 14 |
| 13 | <b>1575.5800</b> | 788.2937         |                |                  | 1557.5695       | 779.2884         | C    | 1604.6832       | 802.8452        | 1587.6566      | <b>794.3320</b>  | 1586.6726      | <b>793.8400</b>  | 13 |
| 14 | <b>1688.6641</b> | 844.8357         |                |                  | 1670.6535       | 835.8304         | L    | 1444.6525       | 722.8299        | 1427.6260      | 714.3166         | 1426.6420      | 713.8246         | 12 |
| 15 | <b>1802.7070</b> | 901.8571         | 1785.6805      | 893.3439         | 1784.6965       | 892.8519         | N    | 1331.5685       | 666.2879        | 1314.5419      | 657.7746         | 1313.5579      | 657.2826         | 11 |
| 16 | 1859.7285        | 930.3679         | 1842.7019      | 921.8546         | 1841.7179       | 921.3626         | G    | 1217.5256       | 609.2664        | 1200.4990      | 600.7531         | 1199.5150      | 600.2611         | 10 |
| 17 | <b>1974.7554</b> | 987.8814         | 1957.7289      | 979.3681         | 1956.7449       | 978.8761         | N    | 1160.5041       | 580.7557        | 1143.4775      | 572.2424         | 1142.4935      | 571.7504         | 9  |
| 18 | 2160.8347        | <b>1080.9210</b> | 2143.8082      | 1072.4077        | 2142.8242       | 1071.9157        | W    | 1045.4771       | 523.2422        | 1028.4506      | 514.7289         | 1027.4666      | 514.2369         | 8  |
| 19 | 2261.8824        | 1131.4448        | 2244.8559      | 1122.9316        | 2243.8719       | 1122.4396        | T    | 859.3978        | 430.2026        | 842.3713       | 421.6893         | 841.3873       | 421.1973         | 7  |
| 20 | 2390.9250        | 1195.9661        | 2373.8985      | <b>1187.4529</b> | 2372.9144       | <b>1186.9609</b> | E    | <b>758.3502</b> | 379.6787        | 741.3236       | 371.1654         | 740.3396       | 370.6734         | 6  |
| 21 | 2487.9778        | 1244.4925        | 2470.9512      | 1235.9793        | 2469.9672       | 1235.4872        | P    | <b>629.3076</b> | 315.1574        | 612.2810       | 306.6441         |                |                  | 5  |
| 22 | 2585.0305        | 1293.0189        | 2568.0040      | <b>1284.5056</b> | 2567.0200       | <b>1284.0136</b> | P    | 532.2548        | 266.6310        | 515.2282       | 258.1178         |                |                  | 4  |
| 23 | 2713.0891        | 1357.0482        | 2696.0626      | 1348.5349        | 2695.0786       | 1348.0429        | Q    | 435.2020        | 218.1047        | 418.1755       | 209.5914         |                |                  | 3  |

|    |           |           |           |           |           |           |   |          |          |          |          |  |  |   |
|----|-----------|-----------|-----------|-----------|-----------|-----------|---|----------|----------|----------|----------|--|--|---|
| 24 | 2873.1198 | 1437.0635 | 2856.0932 | 1428.5502 | 2855.1092 | 1428.0582 | C | 307.1435 | 154.0754 | 290.1169 | 145.5621 |  |  | 2 |
| 25 |           |           |           |           |           |           | K | 147.1128 | 74.0600  | 130.0863 | 65.5468  |  |  | 1 |

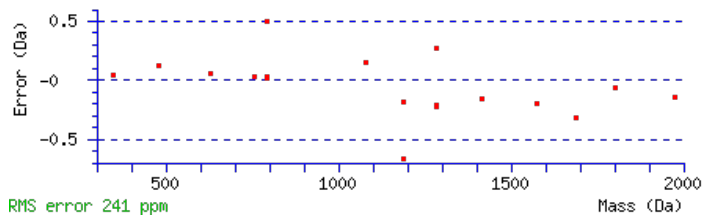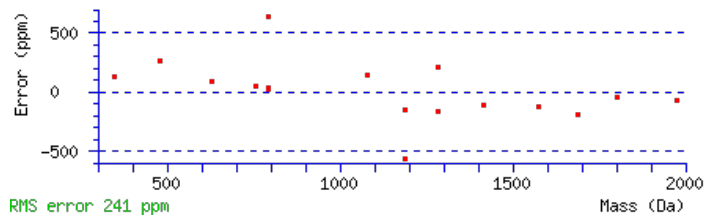

NCBI BLAST search of [SPYEMFGDEEVMCLNGNWTEPPQCK](#)  
 (Parameters: blastp, nr protein database, expect=20000, no filter, PAM30)  
 Other BLAST [web gateways](#)

**All matches to this query**

| Score | Mr(calc)  | Delta  | Sequence                                  | Site Analysis         |
|-------|-----------|--------|-------------------------------------------|-----------------------|
| 45.6  | 3018.2180 | 0.0077 | <a href="#">SPYEMFGDEEVMCLNGNWTEPPQCK</a> | Deamidated N17 88.79% |
| 36.0  | 3018.2180 | 0.0077 | <a href="#">SPYEMFGDEEVMCLNGNWTEPPQCK</a> | Deamidated N15 9.89%  |
| 34.7  | 3017.2340 | 0.9917 | <a href="#">SPYEMFGDEEVMCLNGNWTEPPQCK</a> |                       |
| 27.3  | 3018.2180 | 0.0077 | <a href="#">SPYEMFGDEEVMCLNGNWTEPPQCK</a> | Deamidated Q23 1.31%  |

Mascot: <http://www.matrixscience.com/>

# MATRIX SCIENCE Mascot Search Results

## Peptide View

MS/MS Fragmentation of **NAHGEEKENLTAR**

Found in **Q06033** in **con\_Xuniprot\_HUMAN3**, ITIH3\_HUMAN Inter-alpha-trypsin inhibitor heavy chain H3 OS=Homo sapiens  
GN=ITIH3 PE=1 SV=2

Match to Query 6207: 1468.692762 from(490.571530,3+) intensity(3675.6692) rtinseconds(114) scans(204) index(19262)

Title: 111019\_Est\_MI\_YP\_G\_09Spectrum167\_scans\_\_204

Data file C:\\mascot\\20140703\_Tmgf\_1D\\CSV\_UseAnalysis\\MasterCSV\\All\_Glyco\\mgf\\ptm\\UC18ERLIC\_PTM\_35D.mgf

Click mouse within plot area to zoom in by factor of two about that point

Or, to Da

Label all possible matches Label matches used for scoring

Show Y-axis

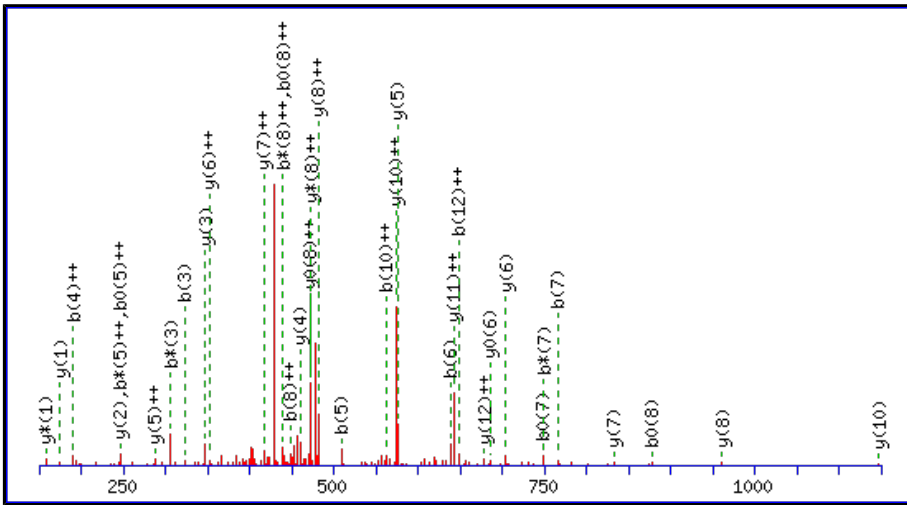

Monoisotopic mass of neutral peptide Mr(calc): 1468.6906

Fixed modifications: Carbamidomethyl (C) (apply to specified residues or termini only)

Variable modifications:

N9 : Deamidated (NQ)

Ions Score: 51 Expect: 0.0013

Matches : 36/132 fragment ions using 60 most intense peaks ([help](#))

| #  | b               | b <sup>++</sup> | b <sup>*</sup>  | b <sup>***</sup> | b <sup>0</sup>  | b <sup>0++</sup> | Seq. | y                | y <sup>++</sup> | y <sup>*</sup>  | y <sup>***</sup> | y <sup>0</sup>  | y <sup>0++</sup> | #  |
|----|-----------------|-----------------|-----------------|------------------|-----------------|------------------|------|------------------|-----------------|-----------------|------------------|-----------------|------------------|----|
| 1  | 115.0502        | 58.0287         | 98.0237         | 49.5155          |                 |                  | N    |                  |                 |                 |                  |                 |                  | 13 |
| 2  | 186.0873        | 93.5473         | 169.0608        | 85.0340          |                 |                  | A    | 1355.6550        | 678.3311        | 1338.6284       | 669.8179         | 1337.6444       | 669.3258         | 12 |
| 3  | <b>323.1462</b> | 162.0768        | <b>306.1197</b> | 153.5635         |                 |                  | H    | 1284.6179        | <b>642.8126</b> | 1267.5913       | 634.2993         | 1266.6073       | 633.8073         | 11 |
| 4  | 380.1677        | <b>190.5875</b> | 363.1411        | 182.0742         |                 |                  | G    | <b>1147.5590</b> | <b>574.2831</b> | 1130.5324       | 565.7698         | 1129.5484       | 565.2778         | 10 |
| 5  | <b>509.2103</b> | 255.1088        | 492.1837        | <b>246.5955</b>  | 491.1997        | <b>246.1035</b>  | E    | 1090.5375        | 545.7724        | 1073.5109       | 537.2591         | 1072.5269       | 536.7671         | 9  |
| 6  | <b>638.2529</b> | 319.6301        | 621.2263        | 311.1168         | 620.2423        | 310.6248         | E    | <b>961.4949</b>  | <b>481.2511</b> | 944.4684        | <b>472.7378</b>  | 943.4843        | <b>472.2458</b>  | 8  |
| 7  | <b>766.3478</b> | 383.6776        | <b>749.3213</b> | 375.1643         | <b>748.3373</b> | 374.6723         | K    | <b>832.4523</b>  | <b>416.7298</b> | 815.4258        | 408.2165         | 814.4417        | 407.7245         | 7  |
| 8  | 895.3904        | <b>448.1989</b> | 878.3639        | <b>439.6856</b>  | <b>877.3799</b> | <b>439.1936</b>  | E    | <b>704.3573</b>  | <b>352.6823</b> | 687.3308        | 344.1690         | <b>686.3468</b> | 343.6770         | 6  |
| 9  | 1010.4174       | 505.7123        | 993.3908        | 497.1991         | 992.4068        | 496.7070         | N    | <b>575.3148</b>  | <b>288.1610</b> | 558.2882        | 279.6477         | 557.3042        | 279.1557         | 5  |
| 10 | 1123.5014       | <b>562.2544</b> | 1106.4749       | 553.7411         | 1105.4909       | 553.2491         | L    | <b>460.2878</b>  | 230.6475        | 443.2613        | 222.1343         | 442.2772        | 221.6423         | 4  |
| 11 | 1224.5491       | 612.7782        | 1207.5226       | 604.2649         | 1206.5386       | 603.7729         | T    | <b>347.2037</b>  | 174.1055        | 330.1772        | 165.5922         | 329.1932        | 165.1002         | 3  |
| 12 | 1295.5862       | <b>648.2968</b> | 1278.5597       | 639.7835         | 1277.5757       | 639.2915         | A    | <b>246.1561</b>  | 123.5817        | 229.1295        | 115.0684         |                 |                  | 2  |
| 13 |                 |                 |                 |                  |                 |                  | R    | <b>175.1190</b>  | 88.0631         | <b>158.0924</b> | 79.5498          |                 |                  | 1  |

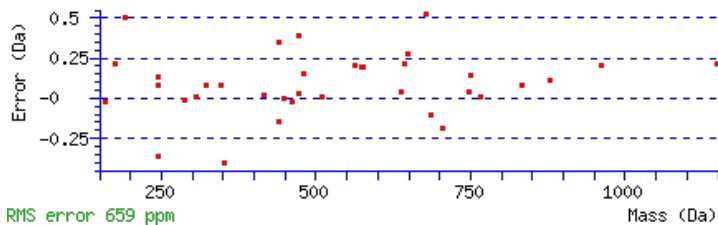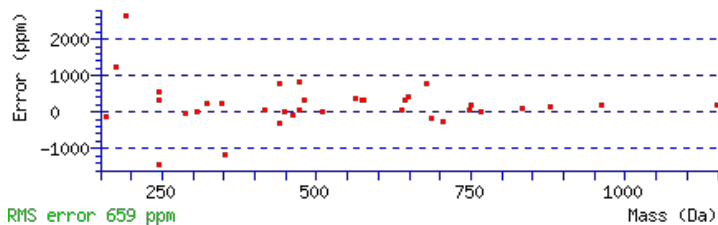

NCBI **BLAST** search of [NAHGEEKENLTAR](#)

(Parameters: blastp, nr protein database, expect=20000, no filter, PAM30)

Other BLAST [web gateways](#)

**All matches to this query**

| Score | Mr(calc)  | Delta   | Sequence                       | Site Analysis        |
|-------|-----------|---------|--------------------------------|----------------------|
| 51.2  | 1468.6906 | 0.0022  | <a href="#">NAHGEEKENLTAR</a>  | Deamidated N9 99.83% |
| 23.5  | 1468.6906 | 0.0022  | <a href="#">NAHGEEKENLTAR</a>  | Deamidated N1 0.17%  |
| 7.7   | 1466.6790 | 2.0138  | <a href="#">GNFIPYANEERR</a>   |                      |
| 7.6   | 1468.6901 | 0.0026  | <a href="#">QISIMQETRSMK</a>   |                      |
| 6.7   | 1467.6841 | 1.0086  | <a href="#">YTDLNSNDVTGLR</a>  |                      |
| 6.6   | 1467.6841 | 1.0086  | <a href="#">YTDLNSNDVTGLR</a>  |                      |
| 6.4   | 1468.6980 | -0.0053 | <a href="#">NLEPLVHDETMR</a>   |                      |
| 6.4   | 1467.6850 | 1.0077  | <a href="#">VMNFTIDGMGNLR</a>  |                      |
| 6.2   | 1466.6862 | 2.0065  | <a href="#">HGQGGQEGDSIVR</a>  |                      |
| 5.6   | 1466.6857 | 2.0070  | <a href="#">MATLRDGMAGTSPK</a> |                      |

Mascot: <http://www.matrixscience.com/>

# MASCOT SCIENCE Mascot Search Results

## Peptide View

MS/MS Fragmentation of **KNAHGEEKENLTAR**

Found in **Q06033** in **con\_Xuniprot\_HUMAN3**, ITIH3\_HUMAN Inter-alpha-trypsin inhibitor heavy chain H3 OS=Homo sapiens  
GN=ITIH3 PE=1 SV=2

Match to Query 7660: 1596.789612 from(533.270480,3+) intensity(6347.7988) rtinseconds(56) scans(89) index(17320)

Title: 111019\_Est\_MI\_YP\_G\_07Spectrum67\_scans\_89

Data file C:\\mascot\\20140703\_Tmgf\_1D\\CSV\_UseAnalysis\\MasterCSV\\All\_Glyco\\mgf\\ptm\\UC18ERLIC\_PTM\_35D.mgf

Click mouse within plot area to zoom in by factor of two about that point

Or, to Da

Label all possible matches Label matches used for scoring

Show Y-axis

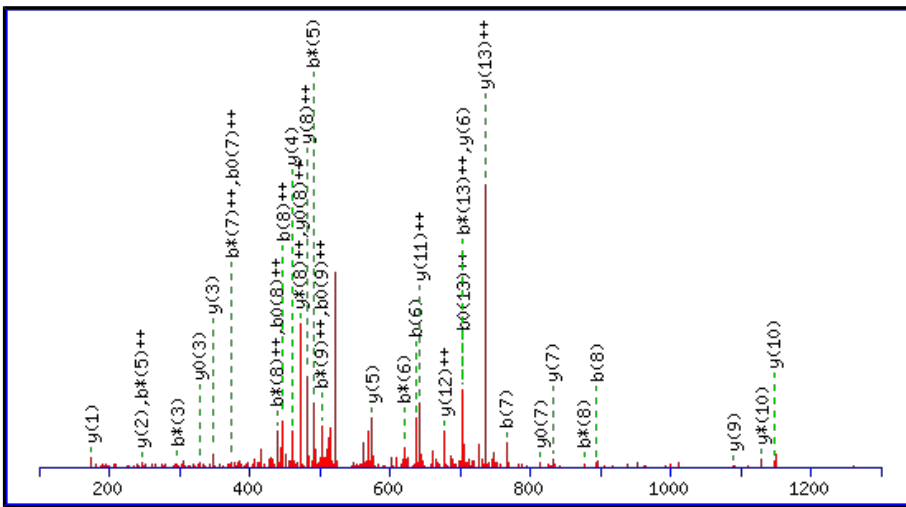

Monoisotopic mass of neutral peptide Mr(calc): 1596.7855

Fixed modifications: Carbamidomethyl (C) (apply to specified residues or termini only)

Variable modifications:

N10 : Deamidated (NQ)

Ions Score: 50 Expect: 0.0023

Matches : 35/142 fragment ions using 59 most intense peaks ([help](#))

| #  | b               | b <sup>++</sup> | b <sup>*</sup>  | b <sup>***</sup> | b <sup>0</sup> | b <sup>0++</sup> | Seq.     | y                | y <sup>++</sup> | y <sup>*</sup>   | y <sup>***</sup> | y <sup>0</sup>  | y <sup>0++</sup> | #         |
|----|-----------------|-----------------|-----------------|------------------|----------------|------------------|----------|------------------|-----------------|------------------|------------------|-----------------|------------------|-----------|
| 1  | 129.1022        | 65.0548         | 112.0757        | 56.5415          |                |                  | <b>K</b> |                  |                 |                  |                  |                 |                  | <b>14</b> |
| 2  | 243.1452        | 122.0762        | 226.1186        | 113.5629         |                |                  | <b>N</b> | 1469.6979        | <b>735.3526</b> | 1452.6714        | 726.8393         | 1451.6873       | 726.3473         | <b>13</b> |
| 3  | 314.1823        | 157.5948        | <b>297.1557</b> | 149.0815         |                |                  | <b>A</b> | 1355.6550        | <b>678.3311</b> | 1338.6284        | 669.8179         | 1337.6444       | 669.3258         | <b>12</b> |
| 4  | 451.2412        | 226.1242        | 434.2146        | 217.6110         |                |                  | <b>H</b> | 1284.6179        | <b>642.8126</b> | 1267.5913        | 634.2993         | 1266.6073       | 633.8073         | <b>11</b> |
| 5  | 508.2627        | 254.6350        | <b>491.2361</b> | <b>246.1217</b>  |                |                  | <b>G</b> | <b>1147.5590</b> | 574.2831        | <b>1130.5324</b> | 565.7698         | 1129.5484       | 565.2778         | <b>10</b> |
| 6  | <b>637.3052</b> | 319.1563        | <b>620.2787</b> | 310.6430         | 619.2947       | 310.1510         | <b>E</b> | <b>1090.5375</b> | 545.7724        | 1073.5109        | 537.2591         | 1072.5269       | 536.7671         | <b>9</b>  |
| 7  | <b>766.3478</b> | 383.6776        | 749.3213        | <b>375.1643</b>  | 748.3373       | <b>374.6723</b>  | <b>E</b> | 961.4949         | <b>481.2511</b> | 944.4684         | <b>472.7378</b>  | 943.4843        | <b>472.2458</b>  | <b>8</b>  |
| 8  | <b>894.4428</b> | <b>447.7250</b> | <b>877.4163</b> | <b>439.2118</b>  | 876.4322       | <b>438.7198</b>  | <b>K</b> | <b>832.4523</b>  | 416.7298        | 815.4258         | 408.2165         | <b>814.4417</b> | 407.7245         | <b>7</b>  |
| 9  | 1023.4854       | 512.2463        | 1006.4588       | <b>503.7331</b>  | 1005.4748      | <b>503.2411</b>  | <b>E</b> | <b>704.3573</b>  | 352.6823        | 687.3308         | 344.1690         | 686.3468        | 343.6770         | <b>6</b>  |
| 10 | 1138.5123       | 569.7598        | 1121.4858       | 561.2465         | 1120.5018      | 560.7545         | <b>N</b> | <b>575.3148</b>  | 288.1610        | 558.2882         | 279.6477         | 557.3042        | 279.1557         | <b>5</b>  |
| 11 | 1251.5964       | 626.3018        | 1234.5699       | 617.7886         | 1233.5858      | 617.2966         | <b>L</b> | <b>460.2878</b>  | 230.6475        | 443.2613         | 222.1343         | 442.2772        | 221.6423         | <b>4</b>  |
| 12 | 1352.6441       | 676.8257        | 1335.6175       | 668.3124         | 1334.6335      | 667.8204         | <b>T</b> | <b>347.2037</b>  | 174.1055        | 330.1772         | 165.5922         | <b>329.1932</b> | 165.1002         | <b>3</b>  |
| 13 | 1423.6812       | 712.3442        | 1406.6546       | <b>703.8310</b>  | 1405.6706      | <b>703.3390</b>  | <b>A</b> | <b>246.1561</b>  | 123.5817        | 229.1295         | 115.0684         |                 |                  | <b>2</b>  |
| 14 |                 |                 |                 |                  |                |                  | <b>R</b> | <b>175.1190</b>  | 88.0631         | 158.0924         | 79.5498          |                 |                  | <b>1</b>  |

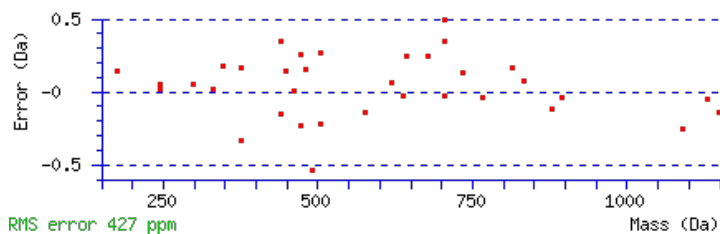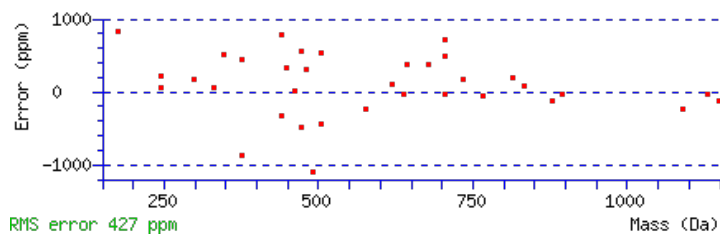

NCBI **BLAST** search of [KNAHGEEKENLTAR](#)

(Parameters: blastp, nr protein database, expect=20000, no filter, PAM30)

Other BLAST [web gateways](#)

**All matches to this query**

| Score | Mr(calc)  | Delta   | Sequence                         | Site Analysis         |
|-------|-----------|---------|----------------------------------|-----------------------|
| 49.6  | 1596.7855 | 0.0041  | <a href="#">KNAHGEEKENLTAR</a>   | Deamidated N10 99.44% |
| 27.1  | 1596.7855 | 0.0041  | <a href="#">KNAHGEEKENLTAR</a>   | Deamidated N2 0.56%   |
| 8.0   | 1596.7817 | 0.0079  | <a href="#">LMSLQEAYSAKEAR</a>   |                       |
| 5.7   | 1595.7845 | 1.0051  | <a href="#">ASPQHHLEFVYPSR</a>   |                       |
| 5.7   | 1596.7896 | 0.0000  | <a href="#">TAWPSGPSAPEAVTAR</a> |                       |
| 5.3   | 1596.7929 | -0.0033 | <a href="#">KSKPNMNYDKLSR</a>    |                       |
| 5.3   | 1596.7929 | -0.0033 | <a href="#">KSKPNMNYDKLSR</a>    |                       |
| 4.9   | 1595.7831 | 1.0065  | <a href="#">FAENLKAGDEFVEK</a>   |                       |
| 3.8   | 1596.7856 | 0.0040  | <a href="#">ESPRSGAPSPGEASLR</a> |                       |
| 3.8   | 1596.7943 | -0.0047 | <a href="#">QVRHVGGEFKMHR</a>    |                       |

Mascot: <http://www.matrixscience.com/>

# MASCOT SCIENCE Mascot Search Results

## Peptide View

MS/MS Fragmentation of **LTSCATNASICGDEAR**

Found in **Q07954** in **con\_Xuniprot\_HUMAN3**, LRP1\_HUMAN Prolow-density lipoprotein receptor-related protein 1 OS=Homo sapiens  
GN=LRP1 PE=1 SV=2

Match to Query 8772: 1725.732768 from(863.873660,2+) intensity(14809.2334) rtinseconds(406) scans(463) index(472)

Title: 111019\_Est\_ISCardio\_NMI\_200000g\_G\_7Spectrum302\_scans\_463

Data file C:\mascot\20140703\_Tmgf\_1D\CSV\_UseAnalysis\MasterCSV\All\_Glyco\mgf\ptm\UC18ERLIC\_PTM\_35D.mgf

Click mouse within plot area to zoom in by factor of two about that point

Or, to Da

Label all possible matches Label matches used for scoring

Show Y-axis

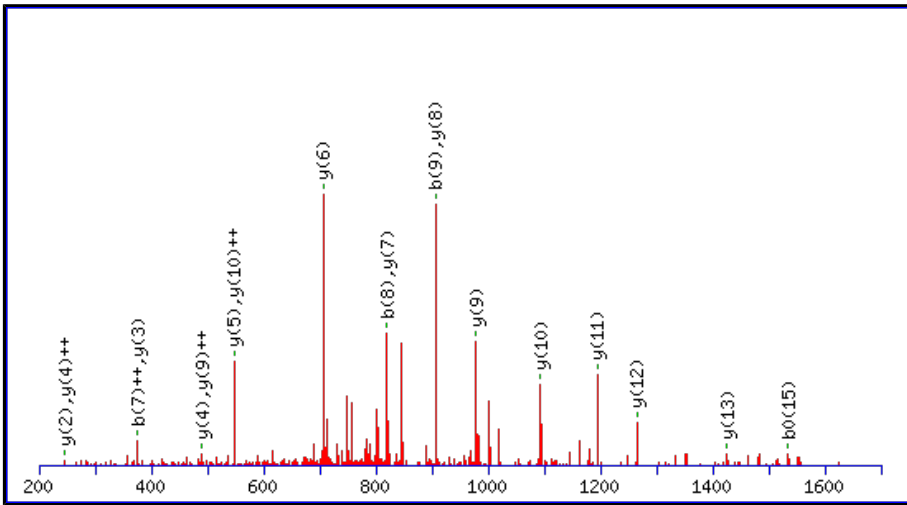

Monoisotopic mass of neutral peptide  $M_r(\text{calc})$ : 1725.7298

Fixed modifications: Carbamidomethyl (C) (apply to specified residues or termini only)

Variable modifications:

N7 : Deamidated (NQ)

Ions Score: 127 Expect: 1.1e-011

Matches : 19/162 fragment ions using 14 most intense peaks ([help](#))

| #  | b               | b <sup>++</sup> | b <sup>*</sup> | b <sup>***</sup> | b <sup>0</sup>   | b <sup>0++</sup> | Seq. | y                | y <sup>++</sup> | y <sup>*</sup> | y <sup>***</sup> | y <sup>0</sup> | y <sup>0++</sup> | #  |
|----|-----------------|-----------------|----------------|------------------|------------------|------------------|------|------------------|-----------------|----------------|------------------|----------------|------------------|----|
| 1  | 114.0913        | 57.5493         |                |                  |                  |                  | L    |                  |                 |                |                  |                |                  | 16 |
| 2  | 215.1390        | 108.0731        |                |                  | 197.1285         | 99.0679          | T    | 1613.6530        | 807.3301        | 1596.6265      | 798.8169         | 1595.6424      | 798.3249         | 15 |
| 3  | 302.1710        | 151.5892        |                |                  | 284.1605         | 142.5839         | S    | 1512.6053        | 756.8063        | 1495.5788      | 748.2930         | 1494.5948      | 747.8010         | 14 |
| 4  | 462.2017        | 231.6045        |                |                  | 444.1911         | 222.5992         | C    | <b>1425.5733</b> | 713.2903        | 1408.5468      | 704.7770         | 1407.5627      | 704.2850         | 13 |
| 5  | 533.2388        | 267.1230        |                |                  | 515.2282         | 258.1178         | A    | <b>1265.5427</b> | 633.2750        | 1248.5161      | 624.7617         | 1247.5321      | 624.2697         | 12 |
| 6  | 634.2865        | 317.6469        |                |                  | 616.2759         | 308.6416         | T    | <b>1194.5055</b> | 597.7564        | 1177.4790      | 589.2431         | 1176.4950      | 588.7511         | 11 |
| 7  | 749.3134        | <b>375.1604</b> | 732.2869       | 366.6471         | 731.3029         | 366.1551         | N    | <b>1093.4579</b> | <b>547.2326</b> | 1076.4313      | 538.7193         | 1075.4473      | 538.2273         | 10 |
| 8  | <b>820.3505</b> | 410.6789        | 803.3240       | 402.1656         | 802.3400         | 401.6736         | A    | <b>978.4309</b>  | <b>489.7191</b> | 961.4044       | 481.2058         | 960.4204       | 480.7138         | 9  |
| 9  | <b>907.3826</b> | 454.1949        | 890.3560       | 445.6817         | 889.3720         | 445.1896         | S    | <b>907.3938</b>  | 454.2005        | 890.3673       | 445.6873         | 889.3832       | 445.1953         | 8  |
| 10 | 1020.4666       | 510.7370        | 1003.4401      | 502.2237         | 1002.4561        | 501.7317         | I    | <b>820.3618</b>  | 410.6845        | 803.3352       | 402.1713         | 802.3512       | 401.6792         | 7  |
| 11 | 1180.4973       | 590.7523        | 1163.4707      | 582.2390         | 1162.4867        | 581.7470         | C    | <b>707.2777</b>  | 354.1425        | 690.2512       | 345.6292         | 689.2671       | 345.1372         | 6  |
| 12 | 1237.5188       | 619.2630        | 1220.4922      | 610.7497         | 1219.5082        | 610.2577         | G    | <b>547.2471</b>  | 274.1272        | 530.2205       | 265.6139         | 529.2365       | 265.1219         | 5  |
| 13 | 1352.5457       | 676.7765        | 1335.5191      | 668.2632         | 1334.5351        | 667.7712         | D    | <b>490.2256</b>  | <b>245.6164</b> | 473.1991       | 237.1032         | 472.2150       | 236.6112         | 4  |
| 14 | 1481.5883       | 741.2978        | 1464.5617      | 732.7845         | 1463.5777        | 732.2925         | E    | <b>375.1987</b>  | 188.1030        | 358.1721       | 179.5897         | 357.1881       | 179.0977         | 3  |
| 15 | 1552.6254       | 776.8163        | 1535.5989      | 768.3031         | <b>1534.6148</b> | 767.8111         | A    | <b>246.1561</b>  | 123.5817        | 229.1295       | 115.0684         |                |                  | 2  |
| 16 |                 |                 |                |                  |                  |                  | R    | 175.1190         | 88.0631         | 158.0924       | 79.5498          |                |                  | 1  |



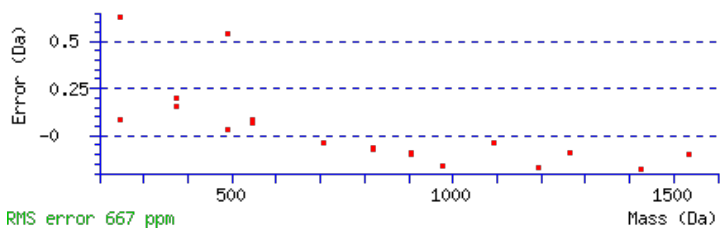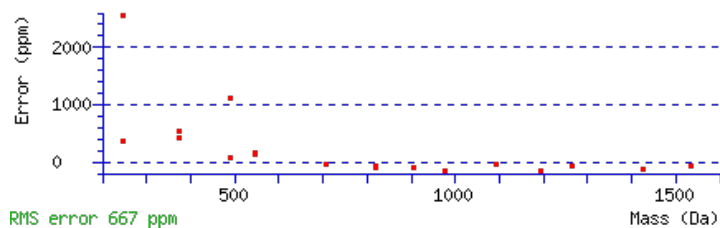

NCBI **BLAST** search of [LTSCATNASICGDEAR](#)

(Parameters: blastp, nr protein database, expect=20000, no filter, PAM30)

Other BLAST [web gateways](#)

**All matches to this query**

| Score | Mr(calc)  | Delta   | Sequence                         |
|-------|-----------|---------|----------------------------------|
| 127.1 | 1725.7298 | 0.0030  | <a href="#">LTSCATNASICGDEAR</a> |
| 12.6  | 1725.7298 | 0.0030  | <a href="#">INMNGINNSSGMVDAR</a> |
| 11.5  | 1725.7298 | 0.0030  | <a href="#">INMNGINNSSGMVDAR</a> |
| 6.3   | 1725.7298 | 0.0030  | <a href="#">INMNGINNSSGMVDAR</a> |
| 5.0   | 1725.7298 | 0.0030  | <a href="#">INMNGINNSSGMVDAR</a> |
| 1.7   | 1725.7369 | -0.0042 | <a href="#">SQDNSVNFSNSWPLK</a>  |
| 0.3   | 1723.7280 | 2.0047  | <a href="#">LEDACIEMDDGAIQK</a>  |
| 0.3   | 1724.7345 | 0.9983  | <a href="#">CNNAAISSMQEELNK</a>  |
| 0.3   | 1724.7345 | 0.9983  | <a href="#">CNNAAISSMQEELNK</a>  |
| 0.1   | 1725.7298 | 0.0030  | <a href="#">INMNGINNSSGMVDAR</a> |

Mascot: <http://www.matrixscience.com/>

# MASCOT SCIENCE Mascot Search Results

## Peptide View

MS/MS Fragmentation of **ALGFENATQALGR**

Found in **K7EJD3** in **con\_Xuniprot\_HUMAN3**, K7EJD3\_HUMAN Galectin-3-binding protein OS=Homo sapiens GN=LGALS3BP PE=2 SV=1

Match to Query 2040: 1347.677868 from(674.846210,2+) intensity(277199.8438) rtinseconds(1423) scans(2703) index(536)

Title: 111019\_Est\_ISCardio\_NMI\_200000g\_G\_7Spectrum2280\_scans\_2703

Data file C:\\mascot\\20140703\_Tmgf\_1D\\CSV\_UseAnalysis\\MasterCSV\\All\_Glyco\\mgf\\ptm\\UC18ERLIC\_PTM\_35D.mgf

Click mouse within plot area to zoom in by factor of two about that point

Or, to Da

Label all possible matches Label matches used for scoring

Show Y-axis

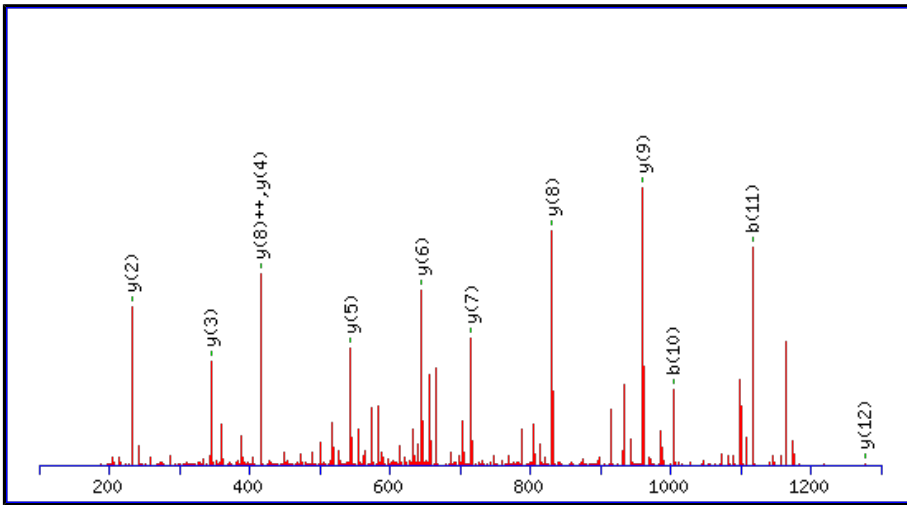

Monoisotopic mass of neutral peptide Mr(calc): 1347.6783

Fixed modifications: Carbamidomethyl (C) (apply to specified residues or termini only)

Variable modifications:

N6 : Deamidated (NQ)

Ions Score: 98 Expect: 3.9e-008

Matches : 12/116 fragment ions using 11 most intense peaks ([help](#))

| #  | b         | b <sup>++</sup> | b <sup>*</sup> | b <sup>+++</sup> | b <sup>0</sup> | b <sup>0++</sup> | Seq. | y         | y <sup>++</sup> | y <sup>*</sup> | y <sup>+++</sup> | y <sup>0</sup> | y <sup>0++</sup> | #  |
|----|-----------|-----------------|----------------|------------------|----------------|------------------|------|-----------|-----------------|----------------|------------------|----------------|------------------|----|
| 1  | 72.0444   | 36.5258         |                |                  |                |                  | A    |           |                 |                |                  |                |                  | 13 |
| 2  | 185.1285  | 93.0679         |                |                  |                |                  | L    | 1277.6484 | 639.3279        | 1260.6219      | 630.8146         | 1259.6379      | 630.3226         | 12 |
| 3  | 242.1499  | 121.5786        |                |                  |                |                  | G    | 1164.5644 | 582.7858        | 1147.5378      | 574.2726         | 1146.5538      | 573.7805         | 11 |
| 4  | 389.2183  | 195.1128        |                |                  |                |                  | F    | 1107.5429 | 554.2751        | 1090.5164      | 545.7618         | 1089.5323      | 545.2698         | 10 |
| 5  | 518.2609  | 259.6341        |                |                  | 500.2504       | 250.6288         | E    | 960.4745  | 480.7409        | 943.4480       | 472.2276         | 942.4639       | 471.7356         | 9  |
| 6  | 633.2879  | 317.1476        | 616.2613       | 308.6343         | 615.2773       | 308.1423         | N    | 831.4319  | 416.2196        | 814.4054       | 407.7063         | 813.4213       | 407.2143         | 8  |
| 7  | 704.3250  | 352.6661        | 687.2984       | 344.1529         | 686.3144       | 343.6608         | A    | 716.4050  | 358.7061        | 699.3784       | 350.1928         | 698.3944       | 349.7008         | 7  |
| 8  | 805.3727  | 403.1900        | 788.3461       | 394.6767         | 787.3621       | 394.1847         | T    | 645.3679  | 323.1876        | 628.3413       | 314.6743         | 627.3573       | 314.1823         | 6  |
| 9  | 933.4312  | 467.2193        | 916.4047       | 458.7060         | 915.4207       | 458.2140         | Q    | 544.3202  | 272.6637        | 527.2936       | 264.1504         |                |                  | 5  |
| 10 | 1004.4684 | 502.7378        | 987.4418       | 494.2245         | 986.4578       | 493.7325         | A    | 416.2616  | 208.6344        | 399.2350       | 200.1212         |                |                  | 4  |
| 11 | 1117.5524 | 559.2798        | 1100.5259      | 550.7666         | 1099.5419      | 550.2746         | L    | 345.2245  | 173.1159        | 328.1979       | 164.6026         |                |                  | 3  |
| 12 | 1174.5739 | 587.7906        | 1157.5473      | 579.2773         | 1156.5633      | 578.7853         | G    | 232.1404  | 116.5738        | 215.1139       | 108.0606         |                |                  | 2  |
| 13 |           |                 |                |                  |                |                  | R    | 175.1190  | 88.0631         | 158.0924       | 79.5498          |                |                  | 1  |

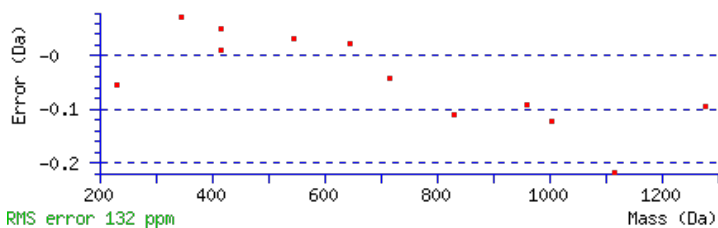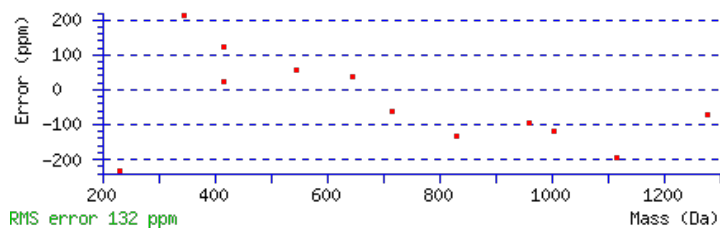

NCBI BLAST search of [ALGFENATQALGR](#)

(Parameters: blastp, nr protein database, expect=20000, no filter, PAM30)

Other BLAST [web gateways](#)

**All matches to this query**

| Score | Mr(calc)  | Delta   | Sequence                      | Site Analysis        |
|-------|-----------|---------|-------------------------------|----------------------|
| 98.0  | 1347.6783 | -0.0004 | <a href="#">ALGFENATQALGR</a> | Deamidated N6 99.90% |
| 67.9  | 1347.6783 | -0.0004 | <a href="#">ALGFENATQALGR</a> | Deamidated Q9 0.10%  |
| 13.6  | 1347.6783 | -0.0004 | <a href="#">GLFQQAADQNKK</a>  |                      |
| 12.7  | 1347.6751 | 0.0028  | <a href="#">KEMEMRQLQR</a>    |                      |
| 9.5   | 1347.6790 | -0.0011 | <a href="#">MTRGTGGTAQRGR</a> |                      |
| 9.0   | 1345.6725 | 2.0054  | <a href="#">EKEKQELEEGK</a>   |                      |
| 8.3   | 1347.6816 | -0.0038 | <a href="#">EMIRAVDELTR</a>   |                      |
| 6.0   | 1347.6751 | 0.0028  | <a href="#">RMGADLCKQLR</a>   |                      |
| 5.6   | 1345.6725 | 2.0054  | <a href="#">KEEKQOEANLK</a>   |                      |
| 4.3   | 1346.6765 | 1.0014  | <a href="#">ITNVCNKVWGR</a>   |                      |

Mascot: <http://www.matrixscience.com/>

# MATRIX SCIENCE Mascot Search Results

## Peptide View

MS/MS Fragmentation of **ALGFENATQALGR**

Found in **K7EJD3** in **con\_Xuniprot\_HUMAN3**, K7EJD3\_HUMAN Galectin-3-binding protein OS=Homo sapiens GN=LGALS3BP PE=2 SV=1

Match to Query 2125: 1348.667288 from(675.340920,2+) intensity(4077.7703) rtinseconds(1464) scans(2332) index(597)

Title: 111019\_Est\_ISCardio\_NMI\_200000g\_G\_8Spectrum1832\_scans\_2332

Data file C:\\mascot\\20140703\_Tmgf\_1D\\CSV\_UseAnalysis\\MasterCSV\\All\_Glyco\\mgf\\ptm\\UC18ERLIC\_PTM\_35D.mgf

Click mouse within plot area to zoom in by factor of two about that point

Or, to Da

Label all possible matches Label matches used for scoring

Show Y-axis

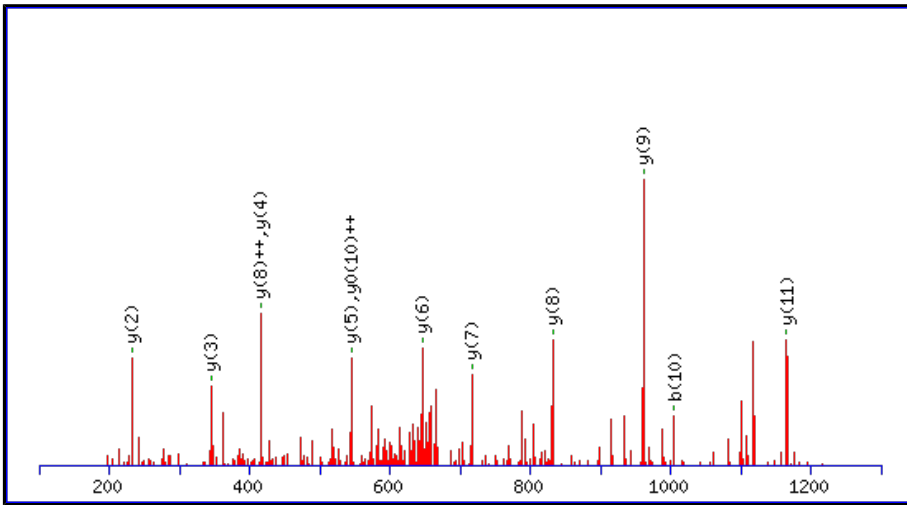

Monoisotopic mass of neutral peptide **Mr(calc)**: 1348.6623

Fixed modifications: Carbamidomethyl (C) (apply to specified residues or termini only)

Variable modifications:

N6 : Deamidated (NQ)

Q9 : Deamidated (NQ)

Ions Score: 85 Expect: 8.9e-007

Matches : 12/116 fragment ions using 11 most intense peaks ([help](#))

| #  | b                | b <sup>++</sup> | b*        | b <sup>+++</sup> | b <sup>0</sup> | b <sup>0++</sup> | Seq. | y                | y <sup>++</sup> | y*        | y <sup>+++</sup> | y <sup>0</sup> | y <sup>0++</sup> | #  |
|----|------------------|-----------------|-----------|------------------|----------------|------------------|------|------------------|-----------------|-----------|------------------|----------------|------------------|----|
| 1  | 72.0444          | 36.5258         |           |                  |                |                  | A    |                  |                 |           |                  |                |                  | 13 |
| 2  | 185.1285         | 93.0679         |           |                  |                |                  | L    | 1278.6325        | 639.8199        | 1261.6059 | 631.3066         | 1260.6219      | 630.8146         | 12 |
| 3  | 242.1499         | 121.5786        |           |                  |                |                  | G    | <b>1165.5484</b> | 583.2778        | 1148.5218 | 574.7646         | 1147.5378      | 574.2726         | 11 |
| 4  | 389.2183         | 195.1128        |           |                  |                |                  | F    | 1108.5269        | 554.7671        | 1091.5004 | 546.2538         | 1090.5164      | <b>545.7618</b>  | 10 |
| 5  | 518.2609         | 259.6341        |           |                  | 500.2504       | 250.6288         | E    | <b>961.4585</b>  | 481.2329        | 944.4320  | 472.7196         | 943.4480       | 472.2276         | 9  |
| 6  | 633.2879         | 317.1476        | 616.2613  | 308.6343         | 615.2773       | 308.1423         | N    | <b>832.4159</b>  | <b>416.7116</b> | 815.3894  | 408.1983         | 814.4054       | 407.7063         | 8  |
| 7  | 704.3250         | 352.6661        | 687.2984  | 344.1529         | 686.3144       | 343.6608         | A    | <b>717.3890</b>  | 359.1981        | 700.3624  | 350.6849         | 699.3784       | 350.1928         | 7  |
| 8  | 805.3727         | 403.1900        | 788.3461  | 394.6767         | 787.3621       | 394.1847         | T    | <b>646.3519</b>  | 323.6796        | 629.3253  | 315.1663         | 628.3413       | 314.6743         | 6  |
| 9  | 934.4153         | 467.7113        | 917.3887  | 459.1980         | 916.4047       | 458.7060         | Q    | <b>545.3042</b>  | 273.1557        | 528.2776  | 264.6425         |                |                  | 5  |
| 10 | <b>1005.4524</b> | 503.2298        | 988.4258  | 494.7165         | 987.4418       | 494.2245         | A    | <b>416.2616</b>  | 208.6344        | 399.2350  | 200.1212         |                |                  | 4  |
| 11 | 1118.5364        | 559.7719        | 1101.5099 | 551.2586         | 1100.5259      | 550.7666         | L    | <b>345.2245</b>  | 173.1159        | 328.1979  | 164.6026         |                |                  | 3  |
| 12 | 1175.5579        | 588.2826        | 1158.5313 | 579.7693         | 1157.5473      | 579.2773         | G    | <b>232.1404</b>  | 116.5738        | 215.1139  | 108.0606         |                |                  | 2  |
| 13 |                  |                 |           |                  |                |                  | R    | 175.1190         | 88.0631         | 158.0924  | 79.5498          |                |                  | 1  |

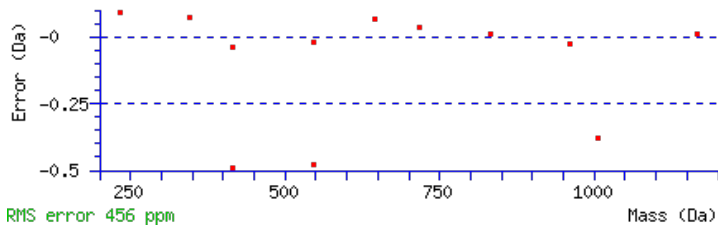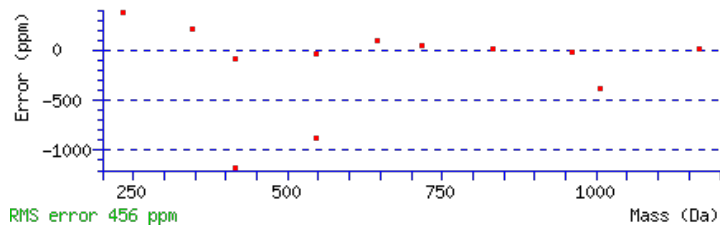

NCBI BLAST search of [ALGFENATQALGR](#)

(Parameters: blastp, nr protein database, expect=20000, no filter, PAM30)

Other BLAST [web gateways](#)

**All matches to this query**

| Score | Mr(calc)  | Delta   | Sequence                      |
|-------|-----------|---------|-------------------------------|
| 84.7  | 1348.6623 | 0.0050  | <a href="#">ALGFENATQALGR</a> |
| 13.4  | 1348.6623 | 0.0050  | <a href="#">GLFQQAADQNKK</a>  |
| 13.4  | 1348.6623 | 0.0050  | <a href="#">GLFQQAADQNKK</a>  |
| 12.8  | 1348.6735 | -0.0062 | <a href="#">NDLRDTEAALGR</a>  |
| 10.4  | 1348.6623 | 0.0050  | <a href="#">GLFQQAADQNKK</a>  |
| 10.4  | 1348.6623 | 0.0050  | <a href="#">GLFQQAADQNKK</a>  |
| 5.7   | 1347.6670 | 1.0003  | <a href="#">ADAIFQEGIQK</a>   |
| 5.7   | 1347.6670 | 1.0003  | <a href="#">ADAIFQEGIQK</a>   |
| 5.2   | 1347.6605 | 1.0068  | <a href="#">ITNVCNKVWGR</a>   |
| 4.9   | 1347.6670 | 1.0003  | <a href="#">NQLISFQNGTPK</a>  |

Mascot: <http://www.matrixscience.com/>

# MATRIX SCIENCE Mascot Search Results

## Peptide View

MS/MS Fragmentation of **TVIRPFYLTNSSGVD**

Found in **Q08380** in **con\_Xuniprot\_HUMAN3**, LG3BP\_HUMAN Galectin-3-binding protein OS=Homo sapiens GN=LGALS3BP PE=1 SV=1

Match to Query 8418: 1668.840248 from(835.427400,2+) intensity(23981.0137) rtinseconds(1600) scans(2629) index(600)

Title: 111019\_Est\_ISCardio\_NMI\_200000g\_G\_8Spectrum2094\_scans\_2629

Data file C:\mascot\20140703\_Tmgf\_1D\CSV\_UseAnalysis\MasterCSV\All\_Glyco\mgf\ptm\UC18ERLIC\_PTM\_35D.mgf

Click mouse within plot area to zoom in by factor of two about that point

Or, to Da

Label all possible matches Label matches used for scoring

Show Y-axis

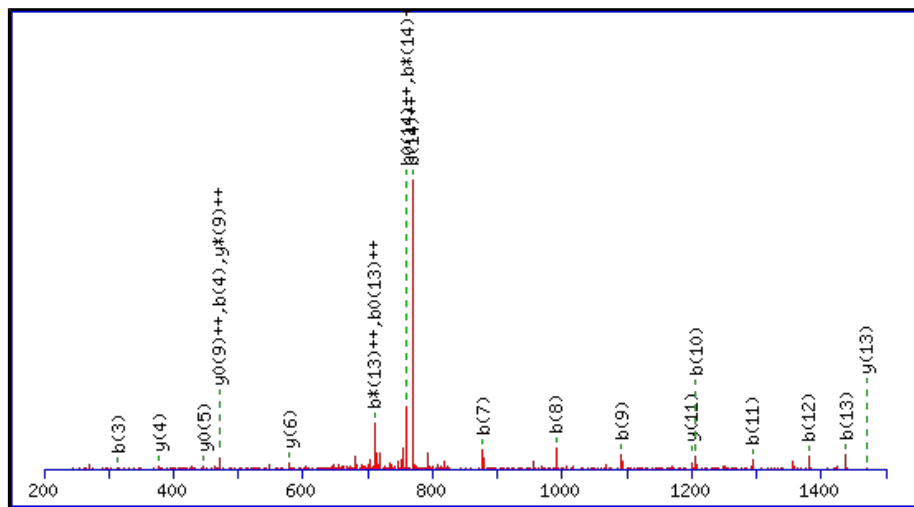

Monoisotopic mass of neutral peptide Mr(calc): 1668.8359

Fixed modifications: Carbamidomethyl (C) (apply to specified residues or termini only)

Variable modifications:

N10 : Deamidated (NQ)

Ions Score: 61 Expect: 0.00016

Matches : 21/152 fragment ions using 26 most intense peaks ([help](#))

| #  | b                | b <sup>++</sup> | b <sup>*</sup> | b <sup>***</sup> | b <sup>0</sup> | b <sup>0++</sup> | Seq. | y                | y <sup>++</sup> | y <sup>*</sup> | y <sup>***</sup> | y <sup>0</sup>  | y <sup>0++</sup> | #  |
|----|------------------|-----------------|----------------|------------------|----------------|------------------|------|------------------|-----------------|----------------|------------------|-----------------|------------------|----|
| 1  | 102.0550         | 51.5311         |                |                  | 84.0444        | 42.5258          | T    |                  |                 |                |                  |                 |                  | 15 |
| 2  | 201.1234         | 101.0653        |                |                  | 183.1128       | 92.0600          | V    | 1568.7955        | 784.9014        | 1551.7690      | 776.3881         | 1550.7849       | 775.8961         | 14 |
| 3  | <b>314.2074</b>  | 157.6074        |                |                  | 296.1969       | 148.6021         | I    | <b>1469.7271</b> | 735.3672        | 1452.7005      | 726.8539         | 1451.7165       | 726.3619         | 13 |
| 4  | <b>470.3085</b>  | 235.6579        | 453.2820       | 227.1446         | 452.2980       | 226.6526         | R    | 1356.6430        | 678.8251        | 1339.6165      | 670.3119         | 1338.6325       | 669.8199         | 12 |
| 5  | 567.3613         | 284.1843        | 550.3348       | 275.6710         | 549.3507       | 275.1790         | P    | <b>1200.5419</b> | 600.7746        | 1183.5154      | 592.2613         | 1182.5313       | 591.7693         | 11 |
| 6  | 714.4297         | 357.7185        | 697.4032       | 349.2052         | 696.4192       | 348.7132         | F    | 1103.4891        | 552.2482        | 1086.4626      | 543.7349         | 1085.4786       | 543.2429         | 10 |
| 7  | <b>877.4931</b>  | 439.2502        | 860.4665       | 430.7369         | 859.4825       | 430.2449         | Y    | 956.4207         | 478.7140        | 939.3942       | <b>470.2007</b>  | 938.4102        | <b>469.7087</b>  | 9  |
| 8  | <b>990.5771</b>  | 495.7922        | 973.5506       | 487.2789         | 972.5665       | 486.7869         | L    | 793.3574         | 397.1823        | 776.3309       | 388.6691         | 775.3468        | 388.1771         | 8  |
| 9  | <b>1091.6248</b> | 546.3160        | 1074.5982      | 537.8028         | 1073.6142      | 537.3108         | T    | 680.2733         | 340.6403        | 663.2468       | 332.1270         | 662.2628        | 331.6350         | 7  |
| 10 | <b>1206.6517</b> | 603.8295        | 1189.6252      | 595.3162         | 1188.6412      | 594.8242         | N    | <b>579.2257</b>  | 290.1165        | 562.1991       | 281.6032         | 561.2151        | 281.1112         | 6  |
| 11 | <b>1293.6838</b> | 647.3455        | 1276.6572      | 638.8322         | 1275.6732      | 638.3402         | S    | 464.1987         | 232.6030        |                |                  | <b>446.1882</b> | 223.5977         | 5  |
| 12 | <b>1380.7158</b> | 690.8615        | 1363.6892      | 682.3483         | 1362.7052      | 681.8563         | S    | <b>377.1667</b>  | 189.0870        |                |                  | 359.1561        | 180.0817         | 4  |
| 13 | <b>1437.7373</b> | 719.3723        | 1420.7107      | <b>710.8590</b>  | 1419.7267      | <b>710.3670</b>  | G    | 290.1347         | 145.5710        |                |                  | 272.1241        | 136.5657         | 3  |
| 14 | 1536.8057        | <b>768.9065</b> | 1519.7791      | <b>760.3932</b>  | 1518.7951      | <b>759.9012</b>  | V    | 233.1132         | 117.0602        |                |                  | 215.1026        | 108.0550         | 2  |
| 15 |                  |                 |                |                  |                |                  | D    | 134.0448         | 67.5260         |                |                  | 116.0342        | 58.5207          | 1  |

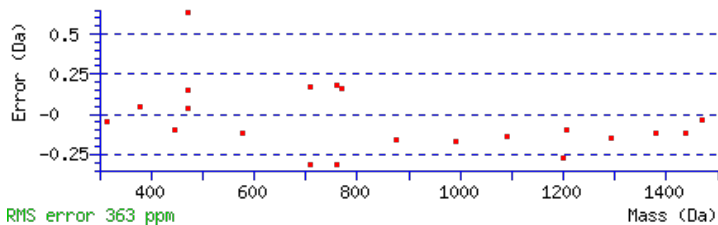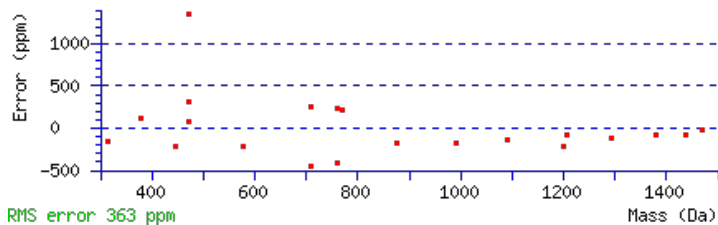

NCBI BLAST search of [TVIRPFYLTNSSGVD](#)

(Parameters: blastp, nr protein database, expect=20000, no filter, PAM30)

Other BLAST [web gateways](#)

All matches to this query

| Score | Mr(calc)  | Delta  | Sequence                          |
|-------|-----------|--------|-----------------------------------|
| 61.3  | 1668.8359 | 0.0043 | <a href="#">TVIRPFYLTNSSGVD</a>   |
| 5.4   | 1667.8301 | 1.0102 | <a href="#">LAELLTQQHGLQCR</a>    |
| 4.8   | 1667.8339 | 1.0064 | <a href="#">AKNQSQKQHGNASIR</a>   |
| 4.3   | 1667.8339 | 1.0064 | <a href="#">AKNQSQKQHGNASIR</a>   |
| 4.3   | 1667.8339 | 1.0064 | <a href="#">AKNQSQKQHGNASIR</a>   |
| 4.0   | 1667.8301 | 1.0101 | <a href="#">QATSIKDVGAPMVSQH</a>  |
| 1.4   | 1667.8452 | 0.9951 | <a href="#">GROPNSATSGRAGVGPR</a> |
| 1.4   | 1667.8452 | 0.9951 | <a href="#">GROPNSATSGRAGVGPR</a> |
| 1.0   | 1668.8332 | 0.0071 | <a href="#">YASLSNHQRVHTEK</a>    |
| 0.5   | 1668.8372 | 0.0030 | <a href="#">NESAASALNFPFARR</a>   |

Mascot: <http://www.matrixscience.com/>



# MASCOT SCIENCE Mascot Search Results

## Peptide View

MS/MS Fragmentation of **YKGLNLTEDTYKPR**

Found in **Q08380** in **con\_Xuniprot\_HUMAN3**, LG3BP\_HUMAN Galectin-3-binding protein OS=Homo sapiens GN=LGALS3BP PE=1 SV=1

Match to Query 8707: 1697.867322 from(566.963050,3+) intensity(23558.4063) rtinseconds(737) scans(1814) index(17376)

Title: 111019\_Est\_MI\_YP\_G\_07Spectrum1579\_scans\_1814

Data file C:\\mascot\\20140703\_Tmgf\_1D\\CSV\_UseAnalysis\\MasterCSV\\All\_Glyco\\mgf\\ptm\\UC18ERLIC\_PTM\_35D.mgf

Click mouse within plot area to zoom in by factor of two about that point

Or, to Da

Label all possible matches Label matches used for scoring

Show Y-axis

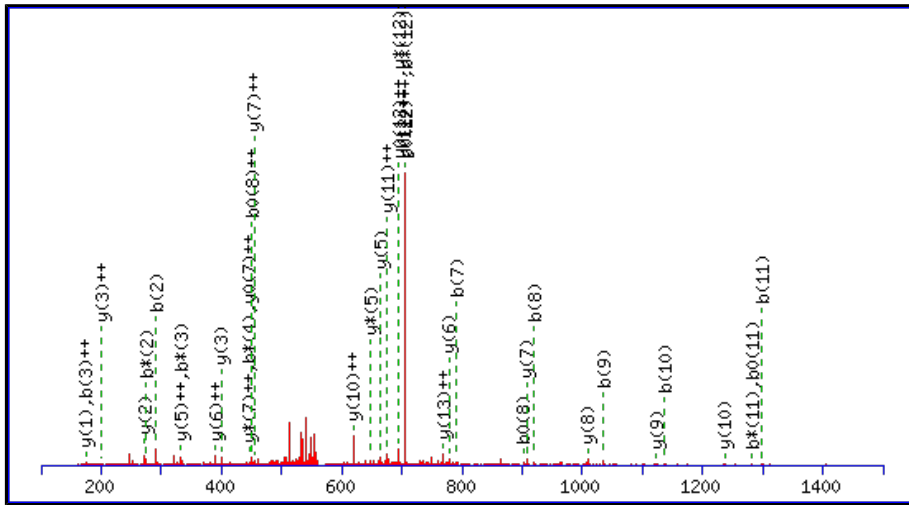

Monoisotopic mass of neutral peptide Mr(calc): 1697.8624

Fixed modifications: Carbamidomethyl (C) (apply to specified residues or termini only)

Variable modifications: N5 : Deamidated (NQ)

Ions Score: 46 Expect: 0.0051

Matches : 38/134 fragment ions using 61 most intense peaks ([help](#))

| #  | b                | b <sup>++</sup> | b <sup>*</sup>   | b <sup>***</sup> | b <sup>0</sup>   | b <sup>0++</sup> | Seq. | y                | y <sup>++</sup> | y <sup>*</sup>  | y <sup>***</sup> | y <sup>0</sup> | y <sup>0++</sup> | #  |
|----|------------------|-----------------|------------------|------------------|------------------|------------------|------|------------------|-----------------|-----------------|------------------|----------------|------------------|----|
| 1  | 164.0706         | 82.5389         |                  |                  |                  |                  | Y    |                  |                 |                 |                  |                |                  | 14 |
| 2  | <b>292.1656</b>  | 146.5864        | <b>275.1390</b>  | 138.0731         |                  |                  | K    | 1535.8064        | <b>768.4068</b> | 1518.7799       | 759.8936         | 1517.7958      | 759.4016         | 13 |
| 3  | 349.1870         | <b>175.0972</b> | <b>332.1605</b>  | 166.5839         |                  |                  | G    | 1407.7114        | <b>704.3594</b> | 1390.6849       | <b>695.8461</b>  | 1389.7009      | <b>695.3541</b>  | 12 |
| 4  | 462.2711         | 231.6392        | <b>445.2445</b>  | 223.1259         |                  |                  | L    | 1350.6900        | <b>675.8486</b> | 1333.6634       | 667.3354         | 1332.6794      | 666.8433         | 11 |
| 5  | 577.2980         | 289.1527        | 560.2715         | 280.6394         |                  |                  | N    | <b>1237.6059</b> | <b>619.3066</b> | 1220.5794       | 610.7933         | 1219.5953      | 610.3013         | 10 |
| 6  | 690.3821         | 345.6947        | 673.3556         | 337.1814         |                  |                  | L    | <b>1122.5790</b> | 561.7931        | 1105.5524       | 553.2798         | 1104.5684      | 552.7878         | 9  |
| 7  | <b>791.4298</b>  | 396.2185        | 774.4032         | 387.7053         | 773.4192         | 387.2132         | T    | <b>1009.4949</b> | 505.2511        | 992.4684        | 496.7378         | 991.4843       | 496.2458         | 8  |
| 8  | <b>920.4724</b>  | 460.7398        | 903.4458         | 452.2266         | <b>902.4618</b>  | <b>451.7345</b>  | E    | <b>908.4472</b>  | <b>454.7272</b> | 891.4207        | <b>446.2140</b>  | 890.4367       | <b>445.7220</b>  | 7  |
| 9  | <b>1035.4993</b> | 518.2533        | 1018.4728        | 509.7400         | 1017.4888        | 509.2480         | D    | <b>779.4046</b>  | <b>390.2060</b> | 762.3781        | 381.6927         | 761.3941       | 381.2007         | 6  |
| 10 | <b>1136.5470</b> | 568.7771        | 1119.5204        | 560.2639         | 1118.5364        | 559.7719         | T    | <b>664.3777</b>  | <b>332.6925</b> | <b>647.3511</b> | 324.1792         | 646.3671       | 323.6872         | 5  |
| 11 | <b>1299.6103</b> | 650.3088        | <b>1282.5838</b> | 641.7955         | <b>1281.5998</b> | 641.3035         | Y    | 563.3300         | 282.1686        | 546.3035        | 273.6554         |                |                  | 4  |
| 12 | 1427.7053        | 714.3563        | 1410.6787        | <b>705.8430</b>  | 1409.6947        | <b>705.3510</b>  | K    | <b>400.2667</b>  | <b>200.6370</b> | 383.2401        | 192.1237         |                |                  | 3  |
| 13 | 1524.7581        | 762.8827        | 1507.7315        | 754.3694         | 1506.7475        | 753.8774         | P    | <b>272.1717</b>  | 136.5895        | 255.1452        | 128.0762         |                |                  | 2  |
| 14 |                  |                 |                  |                  |                  |                  | R    | <b>175.1190</b>  | 88.0631         | 158.0924        | 79.5498          |                |                  | 1  |

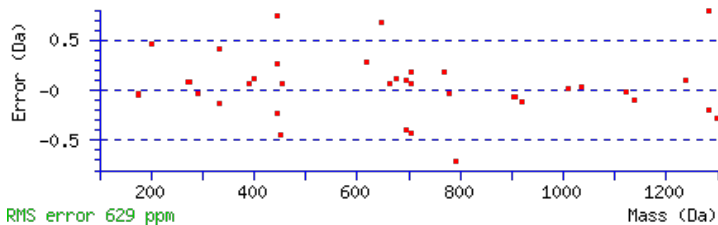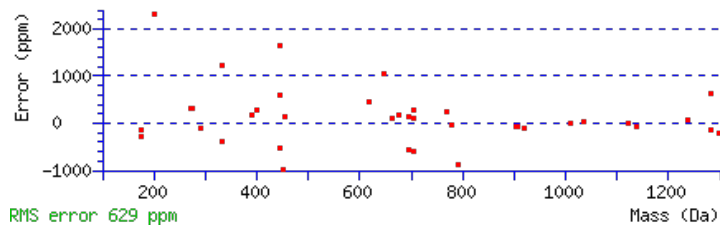

NCBI BLAST search of [YKGLNLTEDTYKPR](#)

(Parameters: blastp, nr protein database, expect=20000, no filter, PAM30)

Other BLAST [web gateways](#)

**All matches to this query**

| Score | Mr(calc)  | Delta   | Sequence                             |
|-------|-----------|---------|--------------------------------------|
| 46.3  | 1697.8624 | 0.0049  | <a href="#">YKGLNLTEDTYKPR</a>       |
| 6.9   | 1696.8631 | 1.0042  | <a href="#">AEAKLHDEESVVTAAK</a>     |
| 5.8   | 1697.8737 | -0.0063 | <a href="#">YQRDEIATVYLTAR</a>       |
| 4.8   | 1697.8658 | 0.0015  | <a href="#">EPVGEGEALLGMDLLR</a>     |
| 3.9   | 1695.8614 | 2.0060  | <a href="#">YKSQMLQLQQKQR</a>        |
| 3.9   | 1695.8614 | 2.0060  | <a href="#">YKSQMLQLQQKQR</a>        |
| 3.9   | 1695.8614 | 2.0060  | <a href="#">YKSQMLQLQQKQR</a>        |
| 3.8   | 1696.8640 | 1.0033  | <a href="#">YKGLMDCAKQVLQK</a>       |
| 3.7   | 1697.8737 | -0.0064 | <a href="#">GGGPVFPAPVVGSGGATSGK</a> |
| 3.0   | 1696.8566 | 1.0107  | <a href="#">KYQLSVSKECGGVSR</a>      |

Mascot: <http://www.matrixscience.com/>

# MATRIX SCIENCE Mascot Search Results

## Peptide View

MS/MS Fragmentation of **FNPGAESVVLNSTLK**

Found in **Q13201** in **con\_Xuniprot\_HUMAN3**, MMRN1\_HUMAN Multimerin-1 OS=Homo sapiens GN=MMRN1 PE=1 SV=3

Match to Query 8411: 1662.849808 from(832.432180,2+) intensity(8042.7842) rtinseconds(1498) scans(3520) index(20725)

Title: 111019\_Est\_MI\_YP\_G\_11Spectrum3088\_scans\_\_3520

Data file C:\\mascot\\20140703\_Tmgf\_1D\\CSV\_UseAnalysis\\MasterCSV\\All\_Glyco\\mgf\\ptm\\UC18ERLIC\_PTM\_35D.mgf

Click mouse within plot area to zoom in by factor of two about that point

Or, to Da

Label all possible matches Label matches used for scoring

Show Y-axis

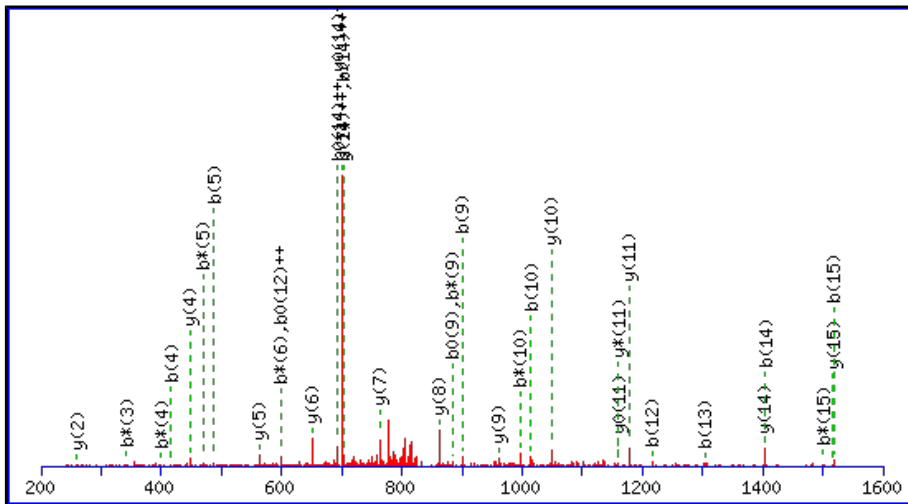

Monoisotopic mass of neutral peptide Mr(calc): 1662.8465

Fixed modifications: Carbamidomethyl (C) (apply to specified residues or termini only)

Variable modifications:

N12 : Deamidated (NQ)

Ions Score: 68 Expect: 3.9e-005

Matches : 36/164 fragment ions using 65 most intense peaks ([help](#))

| #  | b         | b <sup>++</sup> | b*        | b <sup>+++</sup> | b <sup>0</sup> | b <sup>0++</sup> | Seq. | y         | y <sup>++</sup> | y*        | y <sup>+++</sup> | y <sup>0</sup> | y <sup>0++</sup> | #  |
|----|-----------|-----------------|-----------|------------------|----------------|------------------|------|-----------|-----------------|-----------|------------------|----------------|------------------|----|
| 1  | 148.0757  | 74.5415         |           |                  |                |                  | F    |           |                 |           |                  |                |                  | 16 |
| 2  | 262.1186  | 131.5629        | 245.0921  | 123.0497         |                |                  | N    | 1516.7853 | 758.8963        | 1499.7588 | 750.3830         | 1498.7748      | 749.8910         | 15 |
| 3  | 359.1714  | 180.0893        | 342.1448  | 171.5761         |                |                  | P    | 1402.7424 | 701.8748        | 1385.7159 | 693.3616         | 1384.7318      | 692.8696         | 14 |
| 4  | 416.1928  | 208.6001        | 399.1663  | 200.0868         |                |                  | G    | 1305.6896 | 653.3485        | 1288.6631 | 644.8352         | 1287.6791      | 644.3432         | 13 |
| 5  | 487.2300  | 244.1186        | 470.2034  | 235.6053         |                |                  | A    | 1248.6682 | 624.8377        | 1231.6416 | 616.3245         | 1230.6576      | 615.8324         | 12 |
| 6  | 616.2726  | 308.6399        | 599.2460  | 300.1266         | 598.2620       | 299.6346         | E    | 1177.6311 | 589.3192        | 1160.6045 | 580.8059         | 1159.6205      | 580.3139         | 11 |
| 7  | 703.3046  | 352.1559        | 686.2780  | 343.6427         | 685.2940       | 343.1506         | S    | 1048.5885 | 524.7979        | 1031.5619 | 516.2846         | 1030.5779      | 515.7926         | 10 |
| 8  | 802.3730  | 401.6901        | 785.3464  | 393.1769         | 784.3624       | 392.6849         | V    | 961.5564  | 481.2819        | 944.5299  | 472.7686         | 943.5459       | 472.2766         | 9  |
| 9  | 901.4414  | 451.2243        | 884.4149  | 442.7111         | 883.4308       | 442.2191         | V    | 862.4880  | 431.7477        | 845.4615  | 423.2344         | 844.4775       | 422.7424         | 8  |
| 10 | 1014.5255 | 507.7664        | 997.4989  | 499.2531         | 996.5149       | 498.7611         | L    | 763.4196  | 382.2134        | 746.3931  | 373.7002         | 745.4090       | 373.2082         | 7  |
| 11 | 1101.5575 | 551.2824        | 1084.5310 | 542.7691         | 1083.5469      | 542.2771         | S    | 650.3355  | 325.6714        | 633.3090  | 317.1581         | 632.3250       | 316.6661         | 6  |
| 12 | 1216.5844 | 608.7959        | 1199.5579 | 600.2826         | 1198.5739      | 599.7906         | N    | 563.3035  | 282.1554        | 546.2770  | 273.6421         | 545.2930       | 273.1501         | 5  |
| 13 | 1303.6165 | 652.3119        | 1286.5899 | 643.7986         | 1285.6059      | 643.3066         | S    | 448.2766  | 224.6419        | 431.2500  | 216.1287         | 430.2660       | 215.6366         | 4  |
| 14 | 1404.6642 | 702.8357        | 1387.6376 | 694.3224         | 1386.6536      | 693.8304         | T    | 361.2445  | 181.1259        | 344.2180  | 172.6126         | 343.2340       | 172.1206         | 3  |
| 15 | 1517.7482 | 759.3777        | 1500.7217 | 750.8645         | 1499.7376      | 750.3725         | L    | 260.1969  | 130.6021        | 243.1703  | 122.0888         |                |                  | 2  |
| 16 |           |                 |           |                  |                |                  | K    | 147.1128  | 74.0600         | 130.0863  | 65.5468          |                |                  | 1  |

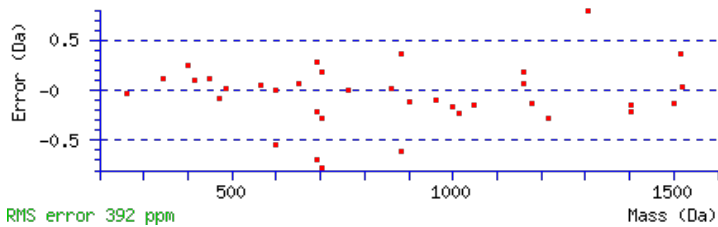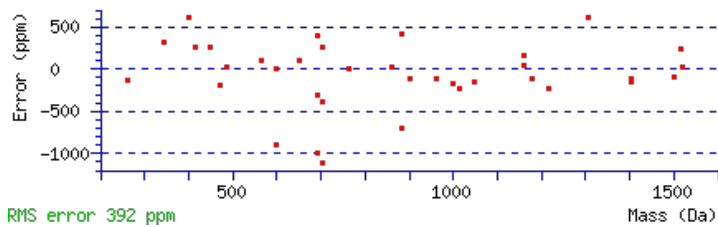

NCBI **BLAST** search of [FNPGAESVVLSNSTLK](#)

(Parameters: blastp, nr protein database, expect=20000, no filter, PAM30)

Other BLAST [web gateways](#)

**All matches to this query**

| Score | Mr(calc)  | Delta   | Sequence                         | Site Analysis          |
|-------|-----------|---------|----------------------------------|------------------------|
| 68.1  | 1662.8465 | 0.0034  | <a href="#">FNPGAESVVLSNSTLK</a> | Deamidated N12 100.00% |
| 20.1  | 1662.8465 | 0.0034  | <a href="#">FNPGAESVVLSNSTLK</a> | Deamidated N2 0.00%    |
| 16.4  | 1662.8433 | 0.0065  | <a href="#">ALDNLARQMIMKDK</a>   |                        |
| 13.2  | 1662.8478 | 0.0020  | <a href="#">FNHAIYSQAQSRLK</a>   |                        |
| 12.2  | 1662.8478 | 0.0020  | <a href="#">FNHAIYSQAQSRLK</a>   |                        |
| 10.3  | 1662.8478 | 0.0020  | <a href="#">FNHAIYSQAQSRLK</a>   |                        |
| 9.9   | 1662.8507 | -0.0009 | <a href="#">LMM AOLPTLEKMNK</a>  |                        |
| 9.7   | 1662.8465 | 0.0034  | <a href="#">FDKATLQVEGADELK</a>  |                        |
| 8.5   | 1662.8577 | -0.0078 | <a href="#">VAARDNKLQQIYDK</a>   |                        |
| 8.5   | 1662.8577 | -0.0078 | <a href="#">VAARDNKLQQIYDK</a>   |                        |

Mascot: <http://www.matrixscience.com/>

# MASCOT SCIENCE Mascot Search Results

## Peptide View

MS/MS Fragmentation of **TQAALSNLTCCIDR**

Found in **E7EPG1** in **con\_Xuniprot\_HUMAN3**, E7EPG1\_HUMAN Multimerin-1 OS=Homo sapiens GN=MMRN1 PE=2 SV=1

Match to Query 7719: 1622.743388 from(812.378970,2+) intensity(2622.8303) rtinseconds(1307) scans(2437) index(524)

Title: 111019\_Est\_ISCardio\_NMI\_200000g\_G\_7Spectrum2041\_scans\_\_2437

Data file C:\\mascot\\20140703\_Tmgf\_1D\\CSV\_UseAnalysis\\MasterCSV\\All\_Glyco\\mgf\\ptm\\UC18ERLIC\_PTM\_35D.mgf

Click mouse within plot area to zoom in by factor of two about that point

Or, to Da

Label all possible matches Label matches used for scoring

Show Y-axis

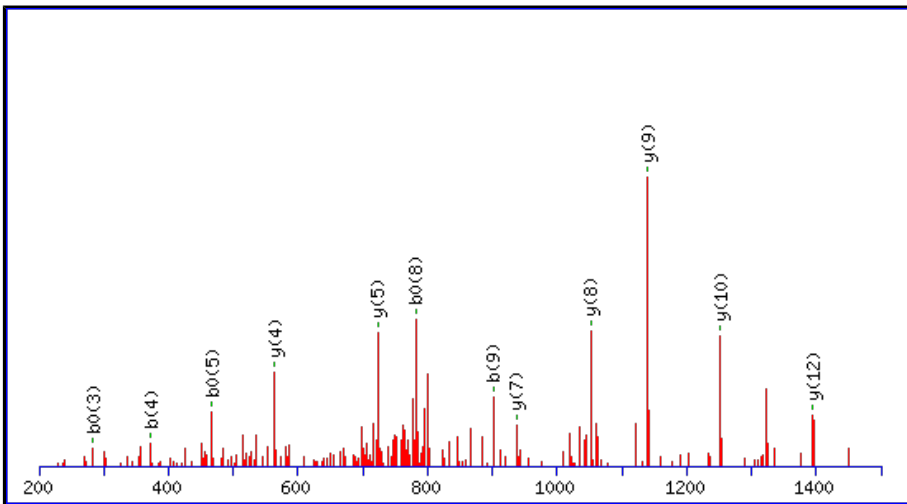

Monoisotopic mass of neutral peptide Mr(calc): 1622.7392

Fixed modifications: Carbamidomethyl (C) (apply to specified residues or termini only)

Variable modifications:

N7 : Deamidated (NQ)

Ions Score: 61 Expect: 0.0001

Matches : 12/152 fragment ions using 13 most intense peaks ([help](#))

| #  | b         | b <sup>++</sup> | b <sup>*</sup> | b <sup>*++</sup> | b <sup>0</sup> | b <sup>0++</sup> | Seq. | y         | y <sup>++</sup> | y <sup>*</sup> | y <sup>*++</sup> | y <sup>0</sup> | y <sup>0++</sup> | #  |
|----|-----------|-----------------|----------------|------------------|----------------|------------------|------|-----------|-----------------|----------------|------------------|----------------|------------------|----|
| 1  | 102.0550  | 51.5311         |                |                  | 84.0444        | 42.5258          | T    |           |                 |                |                  |                |                  | 14 |
| 2  | 230.1135  | 115.5604        | 213.0870       | 107.0471         | 212.1030       | 106.5551         | Q    | 1522.6988 | 761.8531        | 1505.6723      | 753.3398         | 1504.6883      | 752.8478         | 13 |
| 3  | 301.1506  | 151.0790        | 284.1241       | 142.5657         | 283.1401       | 142.0737         | A    | 1394.6403 | 697.8238        | 1377.6137      | 689.3105         | 1376.6297      | 688.8185         | 12 |
| 4  | 372.1878  | 186.5975        | 355.1612       | 178.0842         | 354.1772       | 177.5922         | A    | 1323.6031 | 662.3052        | 1306.5766      | 653.7919         | 1305.5926      | 653.2999         | 11 |
| 5  | 485.2718  | 243.1396        | 468.2453       | 234.6263         | 467.2613       | 234.1343         | L    | 1252.5660 | 626.7867        | 1235.5395      | 618.2734         | 1234.5555      | 617.7814         | 10 |
| 6  | 572.3039  | 286.6556        | 555.2773       | 278.1423         | 554.2933       | 277.6503         | S    | 1139.4820 | 570.2446        | 1122.4554      | 561.7313         | 1121.4714      | 561.2393         | 9  |
| 7  | 687.3308  | 344.1690        | 670.3042       | 335.6558         | 669.3202       | 335.1638         | N    | 1052.4499 | 526.7286        | 1035.4234      | 518.2153         | 1034.4394      | 517.7233         | 8  |
| 8  | 800.4149  | 400.7111        | 783.3883       | 392.1978         | 782.4043       | 391.7058         | L    | 937.4230  | 469.2151        | 920.3965       | 460.7019         | 919.4124       | 460.2099         | 7  |
| 9  | 901.4625  | 451.2349        | 884.4360       | 442.7216         | 883.4520       | 442.2296         | T    | 824.3389  | 412.6731        | 807.3124       | 404.1598         | 806.3284       | 403.6678         | 6  |
| 10 | 1061.4932 | 531.2502        | 1044.4666      | 522.7370         | 1043.4826      | 522.2449         | C    | 723.2913  | 362.1493        | 706.2647       | 353.6360         | 705.2807       | 353.1440         | 5  |
| 11 | 1221.5238 | 611.2656        | 1204.4973      | 602.7523         | 1203.5133      | 602.2603         | C    | 563.2606  | 282.1339        | 546.2341       | 273.6207         | 545.2500       | 273.1287         | 4  |
| 12 | 1334.6079 | 667.8076        | 1317.5814      | 659.2943         | 1316.5973      | 658.8023         | I    | 403.2300  | 202.1186        | 386.2034       | 193.6053         | 385.2194       | 193.1133         | 3  |
| 13 | 1449.6348 | 725.3211        | 1432.6083      | 716.8078         | 1431.6243      | 716.3158         | D    | 290.1459  | 145.5766        | 273.1193       | 137.0633         | 272.1353       | 136.5713         | 2  |
| 14 |           |                 |                |                  |                |                  | R    | 175.1190  | 88.0631         | 158.0924       | 79.5498          |                |                  | 1  |

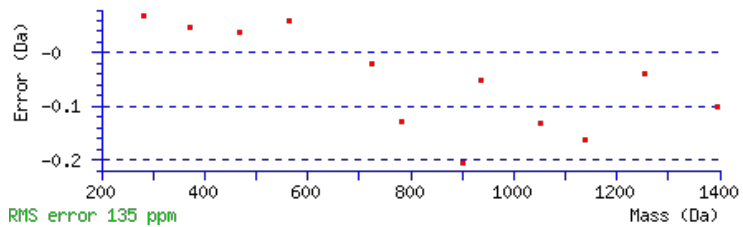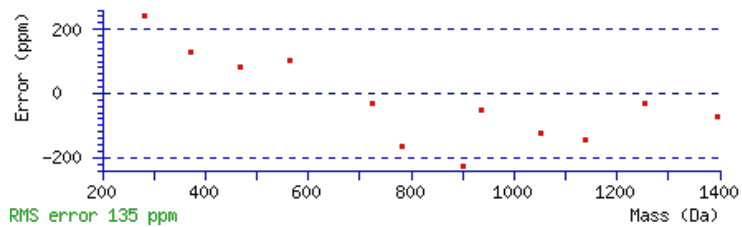

NCBI **BLAST** search of [TQAALSNLTCCIDR](#)

(Parameters: blastp, nr protein database, expect=20000, no filter, PAM30)

Other BLAST [web gateways](#)

**All matches to this query**

| Score | Mr(calc)  | Delta  | Sequence                       | Site Analysis         |
|-------|-----------|--------|--------------------------------|-----------------------|
| 61.4  | 1622.7392 | 0.0042 | <a href="#">TQAALSNLTCCIDR</a> | Deamidated N7 100.00% |
| 11.0  | 1622.7392 | 0.0042 | <a href="#">TQAALSNLTCCIDR</a> | Deamidated Q2 0.00%   |
| 2.5   | 1622.7392 | 0.0042 | <a href="#">ERVAQQEAMKEMR</a>  |                       |

Mascot: <http://www.matrixscience.com/>

# MASCOT SCIENCE Mascot Search Results

## Peptide View

MS/MS Fragmentation of **LQNLTLPNASIK**

Found in **Q13201** in **con\_Xuniprot\_HUMAN3**, MMRN1\_HUMAN Multimerin-1 OS=Homo sapiens GN=MMRN1 PE=1 SV=3

Match to Query 2845: 1413.776848 from(707.895700,2+) intensity(24701.0742) rtinseconds(1359) scans(3120) index(13194)

Title: 111019\_Est\_ISCardio\_NMI\_YS\_G\_11Spectrum2718\_scans\_\_3120

Data file C:\\mascot\\20140703\_Tmgf\_1D\\CSV\_UseAnalysis\\MasterCSV\\All\_Glyco\\mgf\\ptm\\UC18ERLIC\_PTM\_35D.mgf

Click mouse within plot area to zoom in by factor of two about that point

Or, to Da

Label all possible matches Label matches used for scoring

Show Y-axis

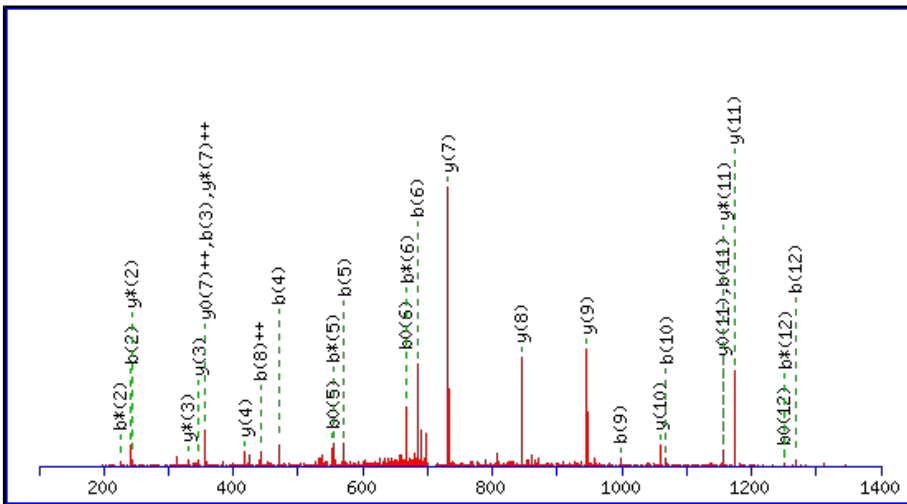

Monoisotopic mass of neutral peptide Mr(calc): 1413.7715

Fixed modifications: Carbamidomethyl (C) (apply to specified residues or termini only)

Variable modifications:

N3 : Deamidated (NQ)

N9 : Deamidated (NQ)

Ions Score: 61 Expect: 0.00014

Matches : 30/130 fragment ions using 46 most intense peaks (help)

| #  | b                | b <sup>++</sup> | b*               | b <sup>+++</sup> | b <sup>0</sup>   | b <sup>0++</sup> | Seq. | y                | y <sup>++</sup> | y*               | y <sup>+++</sup> | y <sup>0</sup>   | y <sup>0++</sup> | #  |
|----|------------------|-----------------|------------------|------------------|------------------|------------------|------|------------------|-----------------|------------------|------------------|------------------|------------------|----|
| 1  | 114.0913         | 57.5493         |                  |                  |                  |                  | L    |                  |                 |                  |                  |                  |                  | 13 |
| 2  | <b>242.1499</b>  | 121.5786        | <b>225.1234</b>  | 113.0653         |                  |                  | Q    | 1301.6947        | 651.3510        | 1284.6682        | 642.8377         | 1283.6842        | 642.3457         | 12 |
| 3  | <b>357.1769</b>  | 179.0921        | 340.1503         | 170.5788         |                  |                  | N    | <b>1173.6361</b> | 587.3217        | <b>1156.6096</b> | 578.8084         | <b>1155.6256</b> | 578.3164         | 11 |
| 4  | <b>470.2609</b>  | 235.6341        | 453.2344         | 227.1208         |                  |                  | L    | <b>1058.6092</b> | 529.8082        | 1041.5827        | 521.2950         | 1040.5986        | 520.8030         | 10 |
| 5  | <b>571.3086</b>  | 286.1579        | <b>554.2821</b>  | 277.6447         | <b>553.2980</b>  | 277.1527         | T    | <b>945.5251</b>  | 473.2662        | 928.4986         | 464.7529         | 927.5146         | 464.2609         | 9  |
| 6  | <b>684.3927</b>  | 342.7000        | <b>667.3661</b>  | 334.1867         | <b>666.3821</b>  | 333.6947         | L    | <b>844.4775</b>  | 422.7424        | 827.4509         | 414.2291         | 826.4669         | 413.7371         | 8  |
| 7  | 781.4454         | 391.2264        | 764.4189         | 382.7131         | 763.4349         | 382.2211         | P    | <b>731.3934</b>  | 366.2003        | 714.3668         | <b>357.6871</b>  | 713.3828         | <b>357.1951</b>  | 7  |
| 8  | 882.4931         | <b>441.7502</b> | 865.4666         | 433.2369         | 864.4825         | 432.7449         | T    | 634.3406         | 317.6740        | 617.3141         | 309.1607         | 616.3301         | 308.6687         | 6  |
| 9  | <b>997.5201</b>  | 499.2637        | 980.4935         | 490.7504         | 979.5095         | 490.2584         | N    | 533.2930         | 267.1501        | 516.2664         | 258.6368         | 515.2824         | 258.1448         | 5  |
| 10 | <b>1068.5572</b> | 534.7822        | 1051.5306        | 526.2689         | 1050.5466        | 525.7769         | A    | <b>418.2660</b>  | 209.6366        | 401.2395         | 201.1234         | 400.2554         | 200.6314         | 4  |
| 11 | <b>1155.5892</b> | 578.2982        | 1138.5626        | 569.7850         | 1137.5786        | 569.2930         | S    | <b>347.2289</b>  | 174.1181        | <b>330.2023</b>  | 165.6048         | 329.2183         | 165.1128         | 3  |
| 12 | <b>1268.6733</b> | 634.8403        | <b>1251.6467</b> | 626.3270         | <b>1250.6627</b> | 625.8350         | I    | 260.1969         | 130.6021        | <b>243.1703</b>  | 122.0888         |                  |                  | 2  |
| 13 |                  |                 |                  |                  |                  |                  | K    | 147.1128         | 74.0600         | 130.0863         | 65.5468          |                  |                  | 1  |



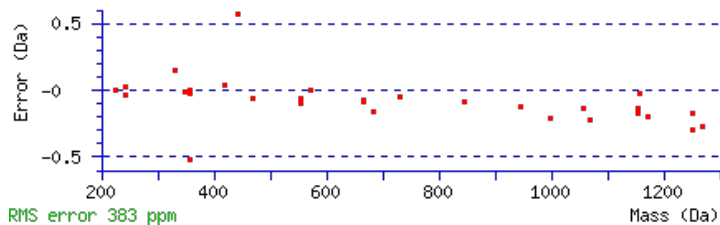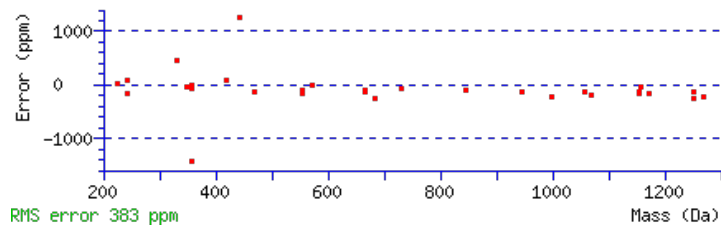

NCBI BLAST search of [LQNLTLPNASIK](#)

(Parameters: blastp, nr protein database, expect=20000, no filter, PAM30)

Other BLAST [web gateways](#)

**All matches to this query**

| Score | Mr(calc)  | Delta   | Sequence                     | Site Analysis            |
|-------|-----------|---------|------------------------------|--------------------------|
| 60.5  | 1413.7715 | 0.0054  | <a href="#">LQNLTLPNASIK</a> | Deamidated N3, N9 73.04% |
| 56.2  | 1413.7715 | 0.0054  | <a href="#">LQNLTLPNASIK</a> | Deamidated Q2, N9 26.95% |
| 22.1  | 1413.7715 | 0.0054  | <a href="#">LQNLTLPNASIK</a> | Deamidated Q2, N3 0.01%  |
| 20.5  | 1413.7827 | -0.0059 | <a href="#">AGNSLKLIQNKD</a> |                          |
| 20.5  | 1413.7827 | -0.0058 | <a href="#">AGNSLKLIQKN</a>  |                          |
| 16.9  | 1413.7715 | 0.0054  | <a href="#">LKDLQGELEQIK</a> |                          |
| 16.9  | 1413.7715 | 0.0054  | <a href="#">LKDLQGELEQIK</a> |                          |
| 14.6  | 1413.7827 | -0.0058 | <a href="#">AGNSLKLIQKN</a>  |                          |
| 14.5  | 1413.7827 | -0.0059 | <a href="#">AGNSLKLIQNKD</a> |                          |
| 14.5  | 1413.7827 | -0.0058 | <a href="#">AGNSLKLIQKN</a>  |                          |

Mascot: <http://www.matrixscience.com/>

# MATRIX SCIENCE Mascot Search Results

## Peptide View

MS/MS Fragmentation of **LPTQNITFQTESSVAEQEAEFQSPK**

Found in **B7ZKJ8** in **con\_Xuniprot\_HUMAN3**, B7ZKJ8\_HUMAN 35 kDa inter-alpha-trypsin inhibitor heavy chain H4 OS=Homo sapiens GN=ITIH4 PE=2 SV=1

Match to Query 25679: 2809.341508 from(1405.678030,2+) intensity(30516.6270) rtinseconds(1778) scans(4630) index(19664)

Title: 111019\_Est\_MI\_YP\_G\_09Spectrum4087\_scans\_4630

Data file C:\mascot\20140703\_Tmgf\_1D\CSV\_UseAnalysis\MasterCSV\All\_Glyco\mgf\ptm\UC18ERLIC\_PTM\_35D.mgf

Click mouse within plot area to zoom in by factor of two about that point

Or, to Da

Label all possible matches Label matches used for scoring

Show Y-axis

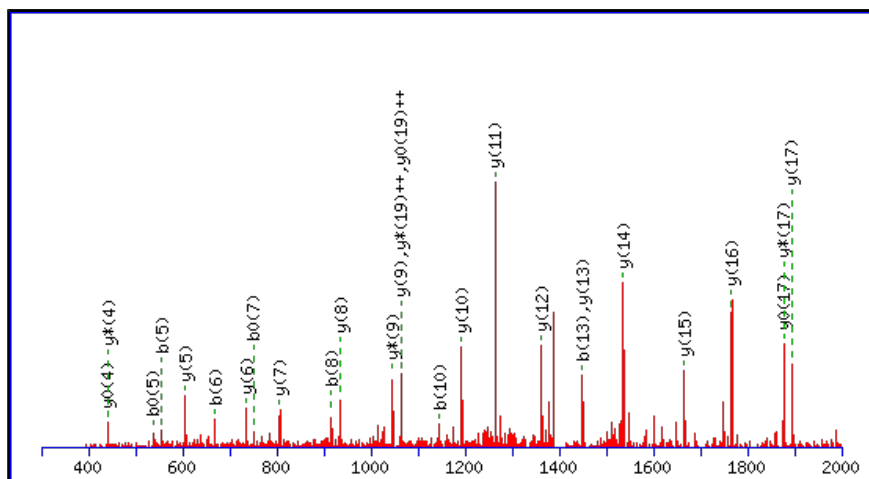

Monoisotopic mass of neutral peptide Mr(calc): 2809.3294

Fixed modifications: Carbamidomethyl (C) (apply to specified residues or termini only)

Variable modifications:

N5 : Deamidated (NQ)

Ions Score: 94 Expect: 1e-007

Matches : 27/274 fragment ions using 34 most intense peaks ([help](#))

| #  | b                | b <sup>++</sup> | b*        | b <sup>***</sup> | b <sup>0</sup>  | b <sup>0++</sup> | Seq. | y                | y <sup>++</sup> | y*               | y <sup>***</sup> | y <sup>0</sup>   | y <sup>0++</sup> | #  |
|----|------------------|-----------------|-----------|------------------|-----------------|------------------|------|------------------|-----------------|------------------|------------------|------------------|------------------|----|
| 1  | 114.0913         | 57.5493         |           |                  |                 |                  | L    |                  |                 |                  |                  |                  |                  | 25 |
| 2  | 211.1441         | 106.0757        |           |                  |                 |                  | P    | 2697.2526        | 1349.1299       | 2680.2261        | 1340.6167        | 2679.2420        | 1340.1247        | 24 |
| 3  | 312.1918         | 156.5995        |           |                  | 294.1812        | 147.5942         | T    | 2600.1999        | 1300.6036       | 2583.1733        | 1292.0903        | 2582.1893        | 1291.5983        | 23 |
| 4  | 440.2504         | 220.6288        | 423.2238  | 212.1155         | 422.2398        | 211.6235         | Q    | 2499.1522        | 1250.0797       | 2482.1256        | 1241.5664        | 2481.1416        | 1241.0744        | 22 |
| 5  | <b>555.2773</b>  | 278.1423        | 538.2508  | 269.6290         | <b>537.2667</b> | 269.1370         | N    | 2371.0936        | 1186.0504       | 2354.0670        | 1177.5372        | 2353.0830        | 1177.0452        | 21 |
| 6  | <b>668.3614</b>  | 334.6843        | 651.3348  | 326.1710         | 650.3508        | 325.6790         | I    | 2256.0667        | 1128.5370       | 2239.0401        | 1120.0237        | 2238.0561        | 1119.5317        | 20 |
| 7  | 769.4090         | 385.2082        | 752.3825  | 376.6949         | <b>751.3985</b> | 376.2029         | T    | 2142.9826        | 1071.9949       | 2125.9560        | <b>1063.4817</b> | 2124.9720        | <b>1062.9896</b> | 19 |
| 8  | <b>916.4775</b>  | 458.7424        | 899.4509  | 450.2291         | 898.4669        | 449.7371         | F    | 2041.9349        | 1021.4711       | 2024.9084        | 1012.9578        | 2023.9243        | 1012.4658        | 18 |
| 9  | 1044.5360        | 522.7717        | 1027.5095 | 514.2584         | 1026.5255       | 513.7664         | Q    | <b>1894.8665</b> | 947.9369        | <b>1877.8399</b> | 939.4236         | <b>1876.8559</b> | 938.9316         | 17 |
| 10 | <b>1145.5837</b> | 573.2955        | 1128.5572 | 564.7822         | 1127.5732       | 564.2902         | T    | <b>1766.8079</b> | 883.9076        | 1749.7814        | 875.3943         | 1748.7974        | 874.9023         | 16 |
| 11 | 1274.6263        | 637.8168        | 1257.5998 | 629.3035         | 1256.6157       | 628.8115         | E    | <b>1665.7602</b> | 833.3838        | 1648.7337        | 824.8705         | 1647.7497        | 824.3785         | 15 |
| 12 | 1361.6583        | 681.3328        | 1344.6318 | 672.8195         | 1343.6478       | 672.3275         | S    | <b>1536.7176</b> | 768.8625        | 1519.6911        | 760.3492         | 1518.7071        | 759.8572         | 14 |
| 13 | <b>1448.6904</b> | 724.8488        | 1431.6638 | 716.3355         | 1430.6798       | 715.8435         | S    | <b>1449.6856</b> | 725.3464        | 1432.6591        | 716.8332         | 1431.6751        | 716.3412         | 13 |
| 14 | 1547.7588        | 774.3830        | 1530.7322 | 765.8698         | 1529.7482       | 765.3777         | V    | <b>1362.6536</b> | 681.8304        | 1345.6270        | 673.3172         | 1344.6430        | 672.8251         | 12 |
| 15 | 1618.7959        | 809.9016        | 1601.7693 | 801.3883         | 1600.7853       | 800.8963         | A    | <b>1263.5852</b> | 632.2962        | 1246.5586        | 623.7830         | 1245.5746        | 623.2909         | 11 |
| 16 | 1747.8385        | 874.4229        | 1730.8119 | 865.9096         | 1729.8279       | 865.4176         | E    | <b>1192.5481</b> | 596.7777        | 1175.5215        | 588.2644         | 1174.5375        | 587.7724         | 10 |
| 17 | 1875.8971        | 938.4522        | 1858.8705 | 929.9389         | 1857.8865       | 929.4469         | Q    | <b>1063.5055</b> | 532.2564        | <b>1046.4789</b> | 523.7431         | 1045.4949        | 523.2511         | 9  |
| 18 | 2004.9397        | 1002.9735       | 1987.9131 | 994.4602         | 1986.9291       | 993.9682         | E    | <b>935.4469</b>  | 468.2271        | 918.4203         | 459.7138         | 917.4363         | 459.2218         | 8  |
| 19 | 2075.9768        | 1038.4920       | 2058.9502 | 1029.9788        | 2057.9662       | 1029.4867        | A    | <b>806.4043</b>  | 403.7058        | 789.3777         | 395.1925         | 788.3937         | 394.7005         | 7  |
| 20 | 2205.0194        | 1103.0133       | 2187.9928 | 1094.5000        | 2187.0088       | 1094.0080        | E    | <b>735.3672</b>  | 368.1872        | 718.3406         | 359.6740         | 717.3566         | 359.1819         | 6  |
| 21 | 2352.0878        | 1176.5475       | 2335.0612 | 1168.0343        | 2334.0772       | 1167.5422        | F    | <b>606.3246</b>  | 303.6659        | 589.2980         | 295.1527         | 588.3140         | 294.6606         | 5  |
| 22 | 2480.1464        | 1240.5768       | 2463.1198 | 1232.0635        | 2462.1358       | 1231.5715        | Q    | 459.2562         | 230.1317        | <b>442.2296</b>  | 221.6185         | <b>441.2456</b>  | 221.1264         | 4  |

|    |           |           |           |           |           |           |   |          |          |          |          |          |          |   |
|----|-----------|-----------|-----------|-----------|-----------|-----------|---|----------|----------|----------|----------|----------|----------|---|
| 23 | 2567.1784 | 1284.0928 | 2550.1518 | 1275.5796 | 2549.1678 | 1275.0875 | S | 331.1976 | 166.1024 | 314.1710 | 157.5892 | 313.1870 | 157.0972 | 3 |
| 24 | 2664.2312 | 1332.6192 | 2647.2046 | 1324.1059 | 2646.2206 | 1323.6139 | P | 244.1656 | 122.5864 | 227.1390 | 114.0731 |          |          | 2 |
| 25 |           |           |           |           |           |           | K | 147.1128 | 74.0600  | 130.0863 | 65.5468  |          |          | 1 |

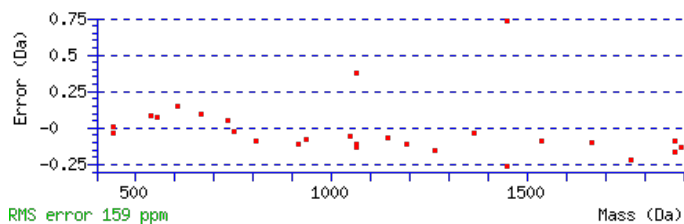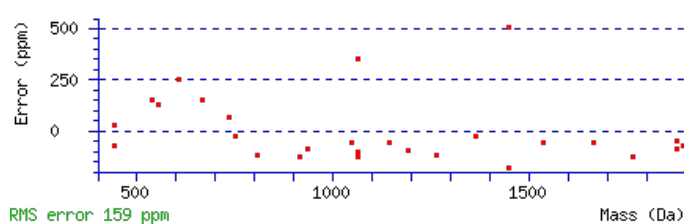

NCBI BLAST search of [LPTQNITFQTESSVAEQEAEFQSPK](#)  
 (Parameters: blastp, nr protein database, expect=20000, no filter, PAM30)  
 Other BLAST [web gateways](#)

All matches to this query

| Score | Mr(calc)  | Delta  | Sequence                                  | Site Analysis        |
|-------|-----------|--------|-------------------------------------------|----------------------|
| 93.8  | 2809.3294 | 0.0121 | <a href="#">LPTQNITFQTESSVAEQEAEFQSPK</a> | Deamidated N5 49.81% |
| 93.8  | 2809.3294 | 0.0121 | <a href="#">LPTQNITFQTESSVAEQEAEFQSPK</a> | Deamidated Q4 49.81% |
| 74.8  | 2808.3454 | 0.9961 | <a href="#">LPTQNITFQTESSVAEQEAEFQSPK</a> |                      |
| 72.6  | 2809.3294 | 0.0121 | <a href="#">LPTQNITFQTESSVAEQEAEFQSPK</a> | Deamidated Q9 0.37%  |
| 40.6  | 2809.3294 | 0.0121 | <a href="#">LPTQNITFQTESSVAEQEAEFQSPK</a> | Deamidated Q17 0.00% |
| 25.6  | 2809.3294 | 0.0121 | <a href="#">LPTQNITFQTESSVAEQEAEFQSPK</a> | Deamidated Q22 0.00% |
| 5.2   | 2808.3514 | 0.9901 | <a href="#">RRSEAPPHIFAVANNAFQDMLHNR</a>  |                      |
| 4.8   | 2808.3514 | 0.9901 | <a href="#">RRSEAPPHIFAVANNAFQDMLHNR</a>  |                      |
| 4.8   | 2808.3514 | 0.9901 | <a href="#">RRSEAPPHIFAVANNAFQDMLHNR</a>  |                      |
| 4.8   | 2808.3514 | 0.9901 | <a href="#">RRSEAPPHIFAVANNAFQDMLHNR</a>  |                      |

Mascot: <http://www.matrixscience.com/>

# MATRIX SCIENCE Mascot Search Results

## Peptide View

MS/MS Fragmentation of **GPDLVLTATVSGKLPQTQITFQTESSVAEQEAEFQSPK**

Found in **B7ZKJ8** in **con\_Xuniprot\_HUMAN3**, B7ZKJ8\_HUMAN 35 kDa inter-alpha-trypsin inhibitor heavy chain H4 OS=Homo sapiens GN=ITIH4 PE=2 SV=1

Match to Query 28173: 3934.947016 from(984.744030,4+) intensity(18123.5273) rtinseconds(2130) scans(5279) index(15297)

Title: 111019\_Est\_MI\_YP\_G\_04Spectrum4545\_scans\_5279

Data file C:\mascot\20140703\_Tmgf\_1D\CSV\_UseAnalysis\MasterCSV\All\_Glyco\mgf\ptm\UC18ERLIC\_PTM\_35D.mgf

Click mouse within plot area to zoom in by factor of two about that point

Or, to Da

Label all possible matches Label matches used for scoring

Show Y-axis

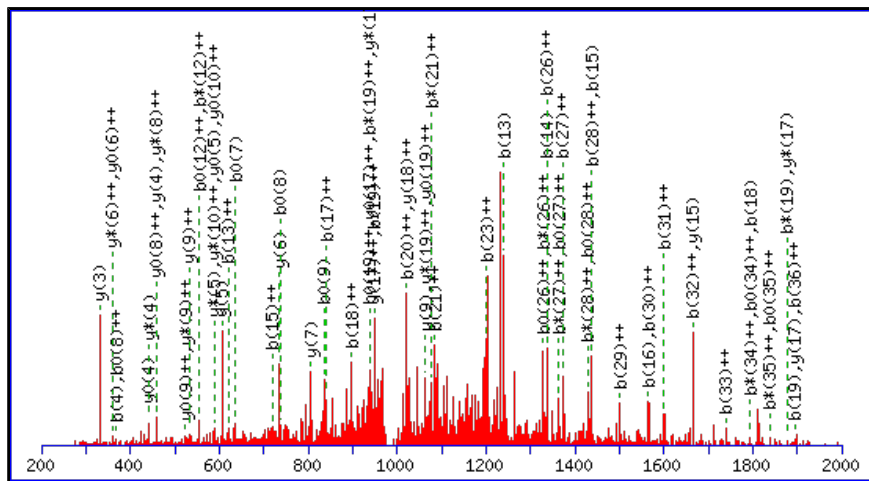

Monoisotopic mass of neutral peptide Mr(calc): 3934.9324

Fixed modifications: Carbamidomethyl (C) (apply to specified residues or termini only)

Variable modifications:

N17 : Deamidated (NQ)

Ions Score: 86 Expect: 5.7e-007

Matches : 72/402 fragment ions using 86 most intense peaks ([help](#))

| #  | b                | b <sup>++</sup>  | b <sup>*</sup>   | b <sup>*++</sup> | b <sup>0</sup>  | b <sup>0++</sup> | Seq.     | y                | y <sup>++</sup>  | y <sup>*</sup>   | y <sup>*++</sup> | y <sup>0</sup> | y <sup>0++</sup> | #         |
|----|------------------|------------------|------------------|------------------|-----------------|------------------|----------|------------------|------------------|------------------|------------------|----------------|------------------|-----------|
| 1  | 58.0287          | 29.5180          |                  |                  |                 |                  | <b>G</b> |                  |                  |                  |                  |                |                  | <b>37</b> |
| 2  | 155.0815         | 78.0444          |                  |                  |                 |                  | <b>P</b> | 3878.9182        | 1939.9627        | 3861.8917        | 1931.4495        | 3860.9076      | 1930.9575        | <b>36</b> |
| 3  | 270.1084         | 135.5579         |                  |                  | 252.0979        | 126.5526         | <b>D</b> | 3781.8654        | 1891.4364        | 3764.8389        | 1882.9231        | 3763.8549      | 1882.4311        | <b>35</b> |
| 4  | <b>369.1769</b>  | 185.0921         |                  |                  | 351.1663        | 176.0868         | <b>V</b> | 3666.8385        | 1833.9229        | 3649.8119        | 1825.4096        | 3648.8279      | 1824.9176        | <b>34</b> |
| 5  | 482.2609         | 241.6341         |                  |                  | 464.2504        | 232.6288         | <b>L</b> | 3567.7701        | 1784.3887        | 3550.7435        | 1775.8754        | 3549.7595      | 1775.3834        | <b>33</b> |
| 6  | 583.3086         | 292.1579         |                  |                  | 565.2980        | 283.1527         | <b>T</b> | 3454.6860        | 1727.8466        | 3437.6595        | 1719.3334        | 3436.6755      | 1718.8414        | <b>32</b> |
| 7  | 654.3457         | 327.6765         |                  |                  | <b>636.3352</b> | 318.6712         | <b>A</b> | 3353.6383        | 1677.3228        | 3336.6118        | 1668.8095        | 3335.6278      | 1668.3175        | <b>31</b> |
| 8  | 755.3934         | 378.2003         |                  |                  | <b>737.3828</b> | <b>369.1951</b>  | <b>T</b> | 3282.6012        | 1641.8043        | 3265.5747        | 1633.2910        | 3264.5907      | 1632.7990        | <b>30</b> |
| 9  | 854.4618         | 427.7345         |                  |                  | <b>836.4512</b> | 418.7293         | <b>V</b> | 3181.5535        | 1591.2804        | 3164.5270        | 1582.7671        | 3163.5430      | 1582.2751        | <b>29</b> |
| 10 | 941.4938         | 471.2506         |                  |                  | 923.4833        | 462.2453         | <b>S</b> | 3082.4851        | 1541.7462        | 3065.4586        | 1533.2329        | 3064.4746      | 1532.7409        | <b>28</b> |
| 11 | 998.5153         | 499.7613         |                  |                  | 980.5047        | 490.7560         | <b>G</b> | 2995.4531        | 1498.2302        | 2978.4266        | 1489.7169        | 2977.4425      | 1489.2249        | <b>27</b> |
| 12 | 1126.6103        | 563.8088         | 1109.5837        | <b>555.2955</b>  | 1108.5997       | <b>554.8035</b>  | <b>K</b> | 2938.4316        | 1469.7195        | 2921.4051        | 1461.2062        | 2920.4211      | 1460.7142        | <b>26</b> |
| 13 | <b>1239.6943</b> | <b>620.3508</b>  | 1222.6678        | 611.8375         | 1221.6838       | 611.3455         | <b>L</b> | 2810.3367        | 1405.6720        | 2793.3101        | 1397.1587        | 2792.3261      | 1396.6667        | <b>25</b> |
| 14 | <b>1336.7471</b> | 668.8772         | 1319.7205        | 660.3639         | 1318.7365       | 659.8719         | <b>P</b> | 2697.2526        | 1349.1299        | 2680.2261        | 1340.6167        | 2679.2420      | 1340.1247        | <b>24</b> |
| 15 | <b>1437.7948</b> | <b>719.4010</b>  | 1420.7682        | 710.8877         | 1419.7842       | 710.3957         | <b>T</b> | 2600.1999        | 1300.6036        | 2583.1733        | 1292.0903        | 2582.1893      | 1291.5983        | <b>23</b> |
| 16 | <b>1565.8534</b> | 783.4303         | 1548.8268        | 774.9170         | 1547.8428       | 774.4250         | <b>Q</b> | 2499.1522        | 1250.0797        | 2482.1256        | 1241.5664        | 2481.1416      | 1241.0744        | <b>22</b> |
| 17 | 1680.8803        | <b>840.9438</b>  | 1663.8537        | 832.4305         | 1662.8697       | 831.9385         | <b>N</b> | 2371.0936        | 1186.0504        | 2354.0670        | 1177.5372        | 2353.0830      | 1177.0452        | <b>21</b> |
| 18 | <b>1793.9644</b> | <b>897.4858</b>  | 1776.9378        | 888.9725         | 1775.9538       | 888.4805         | <b>I</b> | 2256.0667        | 1128.5370        | 2239.0401        | 1120.0237        | 2238.0561      | 1119.5317        | <b>20</b> |
| 19 | <b>1895.0120</b> | <b>948.0097</b>  | <b>1877.9855</b> | <b>939.4964</b>  | 1877.0015       | <b>939.0044</b>  | <b>T</b> | 2142.9826        | 1071.9949        | 2125.9560        | <b>1063.4817</b> | 2124.9720      | <b>1062.9896</b> | <b>19</b> |
| 20 | 2042.0805        | <b>1021.5439</b> | 2025.0539        | 1013.0306        | 2024.0699       | 1012.5386        | <b>F</b> | 2041.9349        | <b>1021.4711</b> | 2024.9084        | 1012.9578        | 2023.9243      | 1012.4658        | <b>18</b> |
| 21 | 2170.1390        | <b>1085.5732</b> | 2153.1125        | <b>1077.0599</b> | 2152.1285       | 1076.5679        | <b>Q</b> | <b>1894.8665</b> | <b>947.9369</b>  | <b>1877.8399</b> | <b>939.4236</b>  | 1876.8559      | <b>938.9316</b>  | <b>17</b> |
| 22 | 2271.1867        | 1136.0970        | 2254.1602        | 1127.5837        | 2253.1761       | 1127.0917        | <b>T</b> | 1766.8079        | 883.9076         | 1749.7814        | 875.3943         | 1748.7974      | 874.9023         | <b>16</b> |

|    |           |                  |           |                  |           |                  |          |                  |                 |                 |                 |                 |                 |           |
|----|-----------|------------------|-----------|------------------|-----------|------------------|----------|------------------|-----------------|-----------------|-----------------|-----------------|-----------------|-----------|
| 23 | 2400.2293 | <b>1200.6183</b> | 2383.2028 | 1192.1050        | 2382.2187 | 1191.6130        | <b>E</b> | <b>1665.7602</b> | 833.3838        | 1648.7337       | 824.8705        | 1647.7497       | 824.3785        | <b>15</b> |
| 24 | 2487.2613 | 1244.1343        | 2470.2348 | 1235.6210        | 2469.2508 | 1235.1290        | <b>S</b> | 1536.7176        | 768.8625        | 1519.6911       | 760.3492        | 1518.7071       | 759.8572        | <b>14</b> |
| 25 | 2574.2934 | 1287.6503        | 2557.2668 | 1279.1370        | 2556.2828 | 1278.6450        | <b>S</b> | 1449.6856        | 725.3464        | 1432.6591       | 716.8332        | 1431.6751       | 716.3412        | <b>13</b> |
| 26 | 2673.3618 | <b>1337.1845</b> | 2656.3352 | <b>1328.6712</b> | 2655.3512 | <b>1328.1792</b> | <b>V</b> | 1362.6536        | 681.8304        | 1345.6270       | 673.3172        | 1344.6430       | 672.8251        | <b>12</b> |
| 27 | 2744.3989 | <b>1372.7031</b> | 2727.3723 | <b>1364.1898</b> | 2726.3883 | <b>1363.6978</b> | <b>A</b> | 1263.5852        | 632.2962        | 1246.5586       | 623.7830        | 1245.5746       | 623.2909        | <b>11</b> |
| 28 | 2873.4415 | <b>1437.2244</b> | 2856.4149 | <b>1428.7111</b> | 2855.4309 | <b>1428.2191</b> | <b>E</b> | 1192.5481        | 596.7777        | 1175.5215       | <b>588.2644</b> | 1174.5375       | <b>587.7724</b> | <b>10</b> |
| 29 | 3001.5001 | <b>1501.2537</b> | 2984.4735 | 1492.7404        | 2983.4895 | 1492.2484        | <b>Q</b> | <b>1063.5055</b> | <b>532.2564</b> | 1046.4789       | <b>523.7431</b> | 1045.4949       | <b>523.2511</b> | <b>9</b>  |
| 30 | 3130.5426 | <b>1565.7750</b> | 3113.5161 | 1557.2617        | 3112.5321 | 1556.7697        | <b>E</b> | 935.4469         | 468.2271        | 918.4203        | <b>459.7138</b> | 917.4363        | <b>459.2218</b> | <b>8</b>  |
| 31 | 3201.5798 | <b>1601.2935</b> | 3184.5532 | 1592.7802        | 3183.5692 | 1592.2882        | <b>A</b> | <b>806.4043</b>  | 403.7058        | 789.3777        | 395.1925        | 788.3937        | 394.7005        | <b>7</b>  |
| 32 | 3330.6224 | <b>1665.8148</b> | 3313.5958 | 1657.3015        | 3312.6118 | 1656.8095        | <b>E</b> | <b>735.3672</b>  | 368.1872        | 718.3406        | <b>359.6740</b> | 717.3566        | <b>359.1819</b> | <b>6</b>  |
| 33 | 3477.6908 | <b>1739.3490</b> | 3460.6642 | 1730.8357        | 3459.6802 | 1730.3437        | <b>F</b> | <b>606.3246</b>  | 303.6659        | <b>589.2980</b> | 295.1527        | <b>588.3140</b> | 294.6606        | <b>5</b>  |
| 34 | 3605.7493 | 1803.3783        | 3588.7228 | <b>1794.8650</b> | 3587.7388 | <b>1794.3730</b> | <b>Q</b> | <b>459.2562</b>  | 230.1317        | <b>442.2296</b> | 221.6185        | <b>441.2456</b> | 221.1264        | <b>4</b>  |
| 35 | 3692.7814 | 1846.8943        | 3675.7548 | <b>1838.3811</b> | 3674.7708 | <b>1837.8890</b> | <b>S</b> | <b>331.1976</b>  | 166.1024        | 314.1710        | 157.5892        | 313.1870        | 157.0972        | <b>3</b>  |
| 36 | 3789.8341 | <b>1895.4207</b> | 3772.8076 | 1886.9074        | 3771.8236 | 1886.4154        | <b>P</b> | 244.1656         | 122.5864        | 227.1390        | 114.0731        |                 |                 | <b>2</b>  |
| 37 |           |                  |           |                  |           |                  | <b>K</b> | 147.1128         | 74.0600         | 130.0863        | 65.5468         |                 |                 | <b>1</b>  |

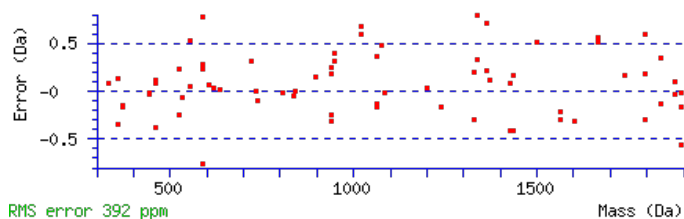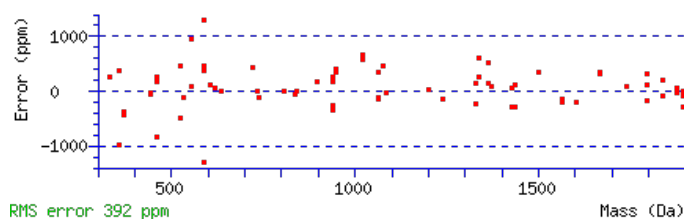

NCBI **BLAST** search of [GPDVLTATVSGKLPQNTIFQTESSVAEQEAEFQSPK](#)

(Parameters: blastp, nr protein database, expect=20000, no filter, PAM30)

Other BLAST [web gateways](#)

**All matches to this query**

| Score | Mr(calc)  | Delta  | Sequence                                             | Site Analysis         |
|-------|-----------|--------|------------------------------------------------------|-----------------------|
| 85.7  | 3934.9324 | 0.0146 | <a href="#">GPDVLTATVSGKLPQNTIFQTESSVAEQEAEFQSPK</a> | Deamidated N17 47.23% |
| 85.7  | 3934.9324 | 0.0146 | <a href="#">GPDVLTATVSGKLPQNTIFQTESSVAEQEAEFQSPK</a> | Deamidated Q16 47.23% |
| 75.7  | 3934.9324 | 0.0146 | <a href="#">GPDVLTATVSGKLPQNTIFQTESSVAEQEAEFQSPK</a> | Deamidated Q21 4.75%  |
| 67.0  | 3934.9324 | 0.0146 | <a href="#">GPDVLTATVSGKLPQNTIFQTESSVAEQEAEFQSPK</a> | Deamidated Q29 0.63%  |
| 62.8  | 3933.9484 | 0.9986 | <a href="#">GPDVLTATVSGKLPQNTIFQTESSVAEQEAEFQSPK</a> |                       |
| 61.0  | 3934.9324 | 0.0146 | <a href="#">GPDVLTATVSGKLPQNTIFQTESSVAEQEAEFQSPK</a> | Deamidated Q34 0.16%  |
| 17.8  | 3932.9236 | 2.0234 | <a href="#">AVVHMSPPAIPASPNPLSSPHLYHKQHNGMKLSMK</a>  |                       |
| 12.4  | 3932.9236 | 2.0234 | <a href="#">AVVHMSPPAIPASPNPLSSPHLYHKQHNGMKLSMK</a>  |                       |
| 10.9  | 3932.9474 | 1.9996 | <a href="#">ILDYMQTVIQSHGQLSINLANLHMTMDVLFALDR</a>   |                       |
| 10.8  | 3932.9474 | 1.9996 | <a href="#">ILDYMQTVIQSHGQLSINLANLHMTMDVLFALDR</a>   |                       |

Mascot: <http://www.matrixscience.com/>

# MASCOT SCIENCE Mascot Search Results

## Peptide View

MS/MS Fragmentation of **GPDLVLTATVSGKLPQTQNTFTQTESSVAEQEAQFQSPK**

Found in **B7ZKJ8** in **con\_Xuniprot\_HUMAN3**, B7ZKJ8\_HUMAN 35 kDa inter-alpha-trypsin inhibitor heavy chain H4 OS=Homo sapiens  
GN=ITIH4 PE=2 SV=1

Match to Query 28191: 3937.921856 from(985.487740,4+) intensity(24666.3457) rtinseconds(2253) scans(5622) index(15348)

Title: 111019\_Est\_MI\_YP\_G\_04Spectrum4850\_scans\_5622

Data file C:\mascot\20140703\_Tmgf\_1D\CSV\_UseAnalysis\MasterCSV\All\_Glyco\mgf\ptm\UC18ERLIC\_PTM\_35D.mgf

Click mouse within plot area to zoom in by factor of two about that point

Or, to Da

Label all possible matches Label matches used for scoring

Show Y-axis

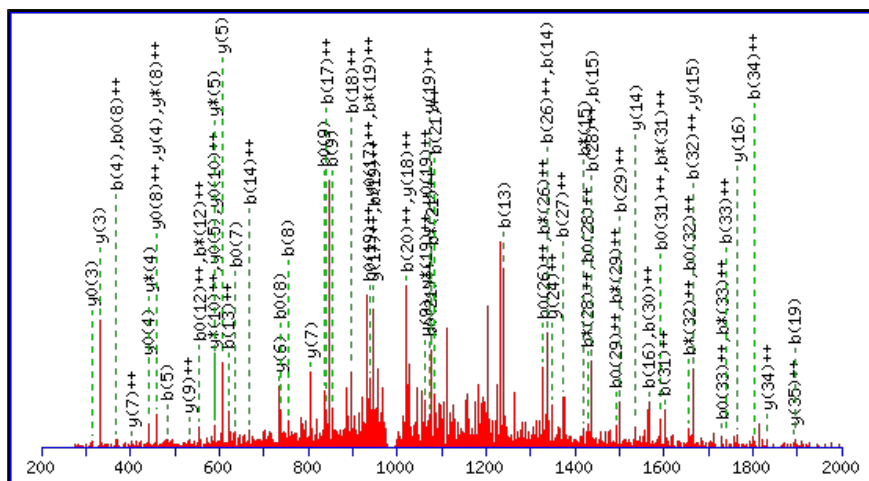

Monoisotopic mass of neutral peptide Mr(calc): 3935.9164

Fixed modifications: Carbamidomethyl (C) (apply to specified residues or termini only)

Variable modifications:

N17 : Deamidated (NQ)

Q21 : Deamidated (NQ)

Ions Score: 69 Expect: 2.6e-005

Matches : 77/402 fragment ions using 121 most intense peaks ([help](#))

| #  | b                | b <sup>++</sup>  | b*               | b <sup>***</sup> | b <sup>0</sup>  | b <sup>0++</sup> | Seq.     | y         | y <sup>++</sup>  | y*        | y <sup>***</sup> | y <sup>0</sup> | y <sup>0++</sup> | #         |
|----|------------------|------------------|------------------|------------------|-----------------|------------------|----------|-----------|------------------|-----------|------------------|----------------|------------------|-----------|
| 1  | 58.0287          | 29.5180          |                  |                  |                 |                  | <b>G</b> |           |                  |           |                  |                |                  | <b>37</b> |
| 2  | 155.0815         | 78.0444          |                  |                  |                 |                  | <b>P</b> | 3879.9022 | 1940.4547        | 3862.8757 | 1931.9415        | 3861.8917      | 1931.4495        | <b>36</b> |
| 3  | 270.1084         | 135.5579         |                  |                  | 252.0979        | 126.5526         | <b>D</b> | 3782.8495 | <b>1891.9284</b> | 3765.8229 | 1883.4151        | 3764.8389      | 1882.9231        | <b>35</b> |
| 4  | <b>369.1769</b>  | 185.0921         |                  |                  | 351.1663        | 176.0868         | <b>V</b> | 3667.8225 | <b>1834.4149</b> | 3650.7960 | 1825.9016        | 3649.8119      | 1825.4096        | <b>34</b> |
| 5  | <b>482.2609</b>  | 241.6341         |                  |                  | 464.2504        | 232.6288         | <b>L</b> | 3568.7541 | 1784.8807        | 3551.7276 | 1776.3674        | 3550.7435      | 1775.8754        | <b>33</b> |
| 6  | 583.3086         | 292.1579         |                  |                  | 565.2980        | 283.1527         | <b>T</b> | 3455.6700 | 1728.3387        | 3438.6435 | 1719.8254        | 3437.6595      | 1719.3334        | <b>32</b> |
| 7  | 654.3457         | 327.6765         |                  |                  | <b>636.3352</b> | 318.6712         | <b>A</b> | 3354.6224 | 1677.8148        | 3337.5958 | 1669.3015        | 3336.6118      | 1668.8095        | <b>31</b> |
| 8  | <b>755.3934</b>  | 378.2003         |                  |                  | <b>737.3828</b> | <b>369.1951</b>  | <b>T</b> | 3283.5852 | 1642.2963        | 3266.5587 | 1633.7830        | 3265.5747      | 1633.2910        | <b>30</b> |
| 9  | <b>854.4618</b>  | 427.7345         |                  |                  | <b>836.4512</b> | 418.7293         | <b>V</b> | 3182.5376 | 1591.7724        | 3165.5110 | 1583.2591        | 3164.5270      | 1582.7671        | <b>29</b> |
| 10 | 941.4938         | 471.2506         |                  |                  | 923.4833        | 462.2453         | <b>S</b> | 3083.4691 | 1542.2382        | 3066.4426 | 1533.7249        | 3065.4586      | 1533.2329        | <b>28</b> |
| 11 | 998.5153         | 499.7613         |                  |                  | 980.5047        | 490.7560         | <b>G</b> | 2996.4371 | 1498.7222        | 2979.4106 | 1490.2089        | 2978.4266      | 1489.7169        | <b>27</b> |
| 12 | 1126.6103        | 563.8088         | 1109.5837        | <b>555.2955</b>  | 1108.5997       | <b>554.8035</b>  | <b>K</b> | 2939.4157 | 1470.2115        | 2922.3891 | 1461.6982        | 2921.4051      | 1461.2062        | <b>26</b> |
| 13 | <b>1239.6943</b> | <b>620.3508</b>  | 1222.6678        | 611.8375         | 1221.6838       | 611.3455         | <b>L</b> | 2811.3207 | 1406.1640        | 2794.2941 | 1397.6507        | 2793.3101      | 1397.1587        | <b>25</b> |
| 14 | <b>1336.7471</b> | <b>668.8772</b>  | 1319.7205        | 660.3639         | 1318.7365       | 659.8719         | <b>P</b> | 2698.2366 | <b>1349.6220</b> | 2681.2101 | 1341.1087        | 2680.2261      | 1340.6167        | <b>24</b> |
| 15 | <b>1437.7948</b> | 719.4010         | <b>1420.7682</b> | 710.8877         | 1419.7842       | 710.3957         | <b>T</b> | 2601.1839 | 1301.0956        | 2584.1573 | 1292.5823        | 2583.1733      | 1292.0903        | <b>23</b> |
| 16 | <b>1565.8534</b> | 783.4303         | 1548.8268        | 774.9170         | 1547.8428       | 774.4250         | <b>Q</b> | 2500.1362 | 1250.5717        | 2483.1096 | 1242.0585        | 2482.1256      | 1241.5664        | <b>22</b> |
| 17 | 1680.8803        | <b>840.9438</b>  | 1663.8537        | 832.4305         | 1662.8697       | 831.9385         | <b>N</b> | 2372.0776 | 1186.5424        | 2355.0511 | 1178.0292        | 2354.0670      | 1177.5372        | <b>21</b> |
| 18 | 1793.9644        | <b>897.4858</b>  | 1776.9378        | 888.9725         | 1775.9538       | 888.4805         | <b>I</b> | 2257.0507 | 1129.0290        | 2240.0241 | 1120.5157        | 2239.0401      | 1120.0237        | <b>20</b> |
| 19 | <b>1895.0120</b> | <b>948.0097</b>  | 1877.9855        | <b>939.4964</b>  | 1877.0015       | <b>939.0044</b>  | <b>T</b> | 2143.9666 | <b>1072.4869</b> | 2126.9401 | <b>1063.9737</b> | 2125.9560      | <b>1063.4817</b> | <b>19</b> |
| 20 | 2042.0805        | <b>1021.5439</b> | 2025.0539        | 1013.0306        | 2024.0699       | 1012.5386        | <b>F</b> | 2042.9189 | <b>1021.9631</b> | 2025.8924 | 1013.4498        | 2024.9084      | 1012.9578        | <b>18</b> |
| 21 | 2171.1230        | <b>1086.0652</b> | 2154.0965        | <b>1077.5519</b> | 2153.1125       | <b>1077.0599</b> | <b>Q</b> | 1895.8505 | <b>948.4289</b>  | 1878.8240 | 939.9156         | 1877.8399      | <b>939.4236</b>  | <b>17</b> |



|    |           |           |           |           |           |           |   |           |          |           |          |           |          |    |
|----|-----------|-----------|-----------|-----------|-----------|-----------|---|-----------|----------|-----------|----------|-----------|----------|----|
| 22 | 2272.1707 | 1136.5890 | 2255.1442 | 1128.0757 | 2254.1602 | 1127.5837 | T | 1766.8079 | 883.9076 | 1749.7814 | 875.3943 | 1748.7974 | 874.9023 | 16 |
| 23 | 2401.2133 | 1201.1103 | 2384.1868 | 1192.5970 | 2383.2028 | 1192.1050 | E | 1665.7602 | 833.3838 | 1648.7337 | 824.8705 | 1647.7497 | 824.3785 | 15 |
| 24 | 2488.2453 | 1244.6263 | 2471.2188 | 1236.1130 | 2470.2348 | 1235.6210 | S | 1536.7176 | 768.8625 | 1519.6911 | 760.3492 | 1518.7071 | 759.8572 | 14 |
| 25 | 2575.2774 | 1288.1423 | 2558.2508 | 1279.6290 | 2557.2668 | 1279.1370 | S | 1449.6856 | 725.3464 | 1432.6591 | 716.8332 | 1431.6751 | 716.3412 | 13 |
| 26 | 2674.3458 | 1337.6765 | 2657.3192 | 1329.1633 | 2656.3352 | 1328.6712 | V | 1362.6536 | 681.8304 | 1345.6270 | 673.3172 | 1344.6430 | 672.8251 | 12 |
| 27 | 2745.3829 | 1373.1951 | 2728.3564 | 1364.6818 | 2727.3723 | 1364.1898 | A | 1263.5852 | 632.2962 | 1246.5586 | 623.7830 | 1245.5746 | 623.2909 | 11 |
| 28 | 2874.4255 | 1437.7164 | 2857.3989 | 1429.2031 | 2856.4149 | 1428.7111 | E | 1192.5481 | 596.7777 | 1175.5215 | 588.2644 | 1174.5375 | 587.7724 | 10 |
| 29 | 3002.4841 | 1501.7457 | 2985.4575 | 1493.2324 | 2984.4735 | 1492.7404 | Q | 1063.5055 | 532.2564 | 1046.4789 | 523.7431 | 1045.4949 | 523.2511 | 9  |
| 30 | 3131.5267 | 1566.2670 | 3114.5001 | 1557.7537 | 3113.5161 | 1557.2617 | E | 935.4469  | 468.2271 | 918.4203  | 459.7138 | 917.4363  | 459.2218 | 8  |
| 31 | 3202.5638 | 1601.7855 | 3185.5372 | 1593.2723 | 3184.5532 | 1592.7802 | A | 806.4043  | 403.7058 | 789.3777  | 395.1925 | 788.3937  | 394.7005 | 7  |
| 32 | 3331.6064 | 1666.3068 | 3314.5798 | 1657.7935 | 3313.5958 | 1657.3015 | E | 735.3672  | 368.1872 | 718.3406  | 359.6740 | 717.3566  | 359.1819 | 6  |
| 33 | 3478.6748 | 1739.8410 | 3461.6482 | 1731.3278 | 3460.6642 | 1730.8357 | F | 606.3246  | 303.6659 | 589.2980  | 295.1527 | 588.3140  | 294.6606 | 5  |
| 34 | 3606.7334 | 1803.8703 | 3589.7068 | 1795.3570 | 3588.7228 | 1794.8650 | Q | 459.2562  | 230.1317 | 442.2296  | 221.6185 | 441.2456  | 221.1264 | 4  |
| 35 | 3693.7654 | 1847.3863 | 3676.7388 | 1838.8731 | 3675.7548 | 1838.3811 | S | 331.1976  | 166.1024 | 314.1710  | 157.5892 | 313.1870  | 157.0972 | 3  |
| 36 | 3790.8182 | 1895.9127 | 3773.7916 | 1887.3994 | 3772.8076 | 1886.9074 | P | 244.1656  | 122.5864 | 227.1390  | 114.0731 |           |          | 2  |
| 37 |           |           |           |           |           |           | K | 147.1128  | 74.0600  | 130.0863  | 65.5468  |           |          | 1  |

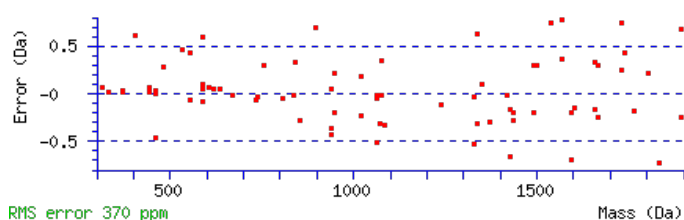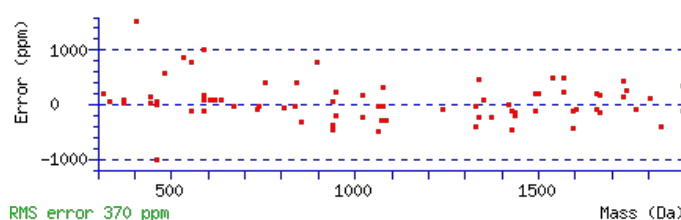

NCBI BLAST search of [GPDVLTATVSGKLPQNTIFQTESSVAEQEAEFQSPK](#)

(Parameters: blastp, nr protein database, expect=20000, no filter, PAM30)

Other BLAST [web gateways](#)

All matches to this query

| Score | Mr(calc)  | Delta  | Sequence                                             | Site Analysis              |
|-------|-----------|--------|------------------------------------------------------|----------------------------|
| 69.4  | 3935.9164 | 2.0055 | <a href="#">GPDVLTATVSGKLPQNTIFQTESSVAEQEAEFQSPK</a> | Deamidated N17, Q21 29.78% |
| 69.4  | 3935.9164 | 2.0055 | <a href="#">GPDVLTATVSGKLPQNTIFQTESSVAEQEAEFQSPK</a> | Deamidated Q16, Q21 29.78% |
| 67.6  | 3936.9004 | 1.0215 | <a href="#">GPDVLTATVSGKLPQNTIFQTESSVAEQEAEFQSPK</a> |                            |
| 66.5  | 3935.9164 | 2.0055 | <a href="#">GPDVLTATVSGKLPQNTIFQTESSVAEQEAEFQSPK</a> | Deamidated Q16, N17 15.45% |
| 63.1  | 3936.9004 | 1.0215 | <a href="#">GPDVLTATVSGKLPQNTIFQTESSVAEQEAEFQSPK</a> |                            |
| 63.0  | 3936.9004 | 1.0215 | <a href="#">GPDVLTATVSGKLPQNTIFQTESSVAEQEAEFQSPK</a> |                            |
| 62.9  | 3935.9164 | 2.0055 | <a href="#">GPDVLTATVSGKLPQNTIFQTESSVAEQEAEFQSPK</a> | Deamidated N17, Q29 6.67%  |
| 62.9  | 3935.9164 | 2.0055 | <a href="#">GPDVLTATVSGKLPQNTIFQTESSVAEQEAEFQSPK</a> | Deamidated Q16, Q29 6.67%  |
| 59.5  | 3936.9004 | 1.0215 | <a href="#">GPDVLTATVSGKLPQNTIFQTESSVAEQEAEFQSPK</a> |                            |
| 59.3  | 3936.9004 | 1.0215 | <a href="#">GPDVLTATVSGKLPQNTIFQTESSVAEQEAEFQSPK</a> |                            |

Mascot: <http://www.matrixscience.com/>



# MATRIX SCIENCE Mascot Search Results

## Peptide View

MS/MS Fragmentation of **AFITNFSMIDGMTYPGHIK**

Found in **B7ZKJ8** in **con\_Xuniprot\_HUMAN3**, B7ZKJ8\_HUMAN 35 kDa inter-alpha-trypsin inhibitor heavy chain H4 OS=Homo sapiens GN=ITIH4 PE=2 SV=1

Match to Query 15083: 2248.123528 from(1125.069040,2+) intensity(32334.7051) rtinseconds(2800) scans(7498) index(16392)

Title: 111019\_Est\_MI\_YP\_G\_05Spectrum6461\_scans\_7498

Data file C:\mascot\20140703\_Tmgf\_1D\CSV\_UseAnalysis\MasterCSV\All\_Glyco\mgf\ptm\UC18ERLIC\_PTM\_35D.mgf

Click mouse within plot area to zoom in by factor of two about that point

Or, to Da

Label all possible matches Label matches used for scoring

Show Y-axis

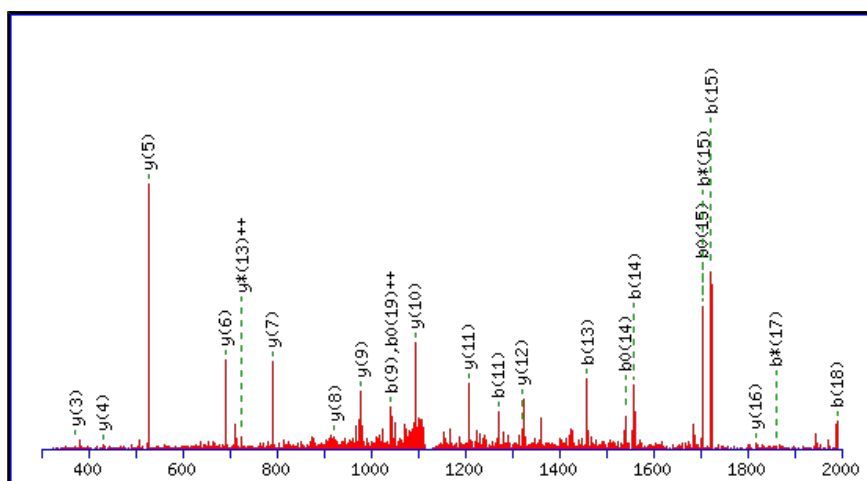

Monoisotopic mass of neutral peptide Mr(calc): 2248.1160

Fixed modifications: Carbamidomethyl (C) (apply to specified residues or termini only)

Variable modifications:

N5 : Deamidated (NQ)

M8 : Oxidation (M), with neutral losses 0.0000(shown in table), 63.9983

Ions Score: 57 Expect: 0.00051

Matches : 23/316 fragment ions using 51 most intense peaks ([help](#))

| #  | b                | b <sup>++</sup> | b*               | b <sup>*++</sup> | b <sup>0</sup>   | b <sup>0++</sup> | Seq. | y                | y <sup>++</sup> | y*        | y <sup>*++</sup> | y <sup>0</sup> | y <sup>0++</sup> | #  |
|----|------------------|-----------------|------------------|------------------|------------------|------------------|------|------------------|-----------------|-----------|------------------|----------------|------------------|----|
| 1  | 72.0444          | 36.5258         |                  |                  |                  |                  | A    |                  |                 |           |                  |                |                  | 20 |
| 2  | 219.1128         | 110.0600        |                  |                  |                  |                  | F    | 2178.0861        | 1089.5467       | 2161.0596 | 1081.0334        | 2160.0756      | 1080.5414        | 19 |
| 3  | 332.1969         | 166.6021        |                  |                  |                  |                  | I    | 2031.0177        | 1016.0125       | 2013.9912 | 1007.4992        | 2013.0072      | 1007.0072        | 18 |
| 4  | 433.2445         | 217.1259        |                  |                  | 415.2340         | 208.1206         | T    | 1917.9337        | 959.4705        | 1900.9071 | 950.9572         | 1899.9231      | 950.4652         | 17 |
| 5  | 548.2715         | 274.6394        | 531.2449         | 266.1261         | 530.2609         | 265.6341         | N    | <b>1816.8860</b> | 908.9466        | 1799.8594 | 900.4333         | 1798.8754      | 899.9413         | 16 |
| 6  | 695.3399         | 348.1736        | 678.3134         | 339.6603         | 677.3293         | 339.1683         | F    | 1701.8590        | 851.4332        | 1684.8325 | 842.9199         | 1683.8485      | 842.4279         | 15 |
| 7  | 782.3719         | 391.6896        | 765.3454         | 383.1763         | 764.3614         | 382.6843         | S    | 1554.7906        | 777.8989        | 1537.7641 | 769.3857         | 1536.7801      | 768.8937         | 14 |
| 8  | 929.4073         | 465.2073        | 912.3808         | 456.6940         | 911.3968         | 456.2020         | M    | 1467.7586        | 734.3829        | 1450.7320 | <b>725.8697</b>  | 1449.7480      | 725.3776         | 13 |
| 9  | <b>1042.4914</b> | 521.7493        | 1025.4648        | 513.2361         | 1024.4808        | 512.7441         | I    | <b>1320.7232</b> | 660.8652        | 1303.6966 | 652.3520         | 1302.7126      | 651.8599         | 12 |
| 10 | 1155.5755        | 578.2914        | 1138.5489        | 569.7781         | 1137.5649        | 569.2861         | I    | <b>1207.6391</b> | 604.3232        | 1190.6126 | 595.8099         | 1189.6286      | 595.3179         | 11 |
| 11 | <b>1270.6024</b> | 635.8048        | 1253.5759        | 627.2916         | 1252.5918        | 626.7996         | D    | <b>1094.5551</b> | 547.7812        | 1077.5285 | 539.2679         | 1076.5445      | 538.7759         | 10 |
| 12 | 1327.6239        | 664.3156        | 1310.5973        | 655.8023         | 1309.6133        | 655.3103         | G    | <b>979.5281</b>  | 490.2677        | 962.5016  | 481.7544         | 961.5176       | 481.2624         | 9  |
| 13 | <b>1458.6644</b> | 729.8358        | 1441.6378        | 721.3225         | 1440.6538        | 720.8305         | M    | <b>922.5067</b>  | 461.7570        | 905.4801  | 453.2437         | 904.4961       | 452.7517         | 8  |
| 14 | <b>1559.7120</b> | 780.3597        | 1542.6855        | 771.8464         | <b>1541.7015</b> | 771.3544         | T    | <b>791.4662</b>  | 396.2367        | 774.4396  | 387.7234         | 773.4556       | 387.2314         | 7  |
| 15 | <b>1722.7754</b> | 861.8913        | <b>1705.7488</b> | 853.3780         | <b>1704.7648</b> | 852.8860         | Y    | <b>690.4185</b>  | 345.7129        | 673.3919  | 337.1996         |                |                  | 6  |
| 16 | 1819.8281        | 910.4177        | 1802.8016        | 901.9044         | 1801.8176        | 901.4124         | P    | <b>527.3552</b>  | 264.1812        | 510.3286  | 255.6679         |                |                  | 5  |
| 17 | 1876.8496        | 938.9284        | <b>1859.8230</b> | 930.4152         | 1858.8390        | 929.9231         | G    | <b>430.3024</b>  | 215.6548        | 413.2758  | 207.1416         |                |                  | 4  |
| 18 | <b>1989.9337</b> | 995.4705        | 1972.9071        | 986.9572         | 1971.9231        | 986.4652         | I    | <b>373.2809</b>  | 187.1441        | 356.2544  | 178.6308         |                |                  | 3  |
| 19 | 2103.0177        | 1052.0125       | 2085.9912        | 1043.4992        | 2085.0072        | <b>1043.0072</b> | I    | 260.1969         | 130.6021        | 243.1703  | 122.0888         |                |                  | 2  |
| 20 |                  |                 |                  |                  |                  |                  | K    | 147.1128         | 74.0600         | 130.0863  | 65.5468          |                |                  | 1  |

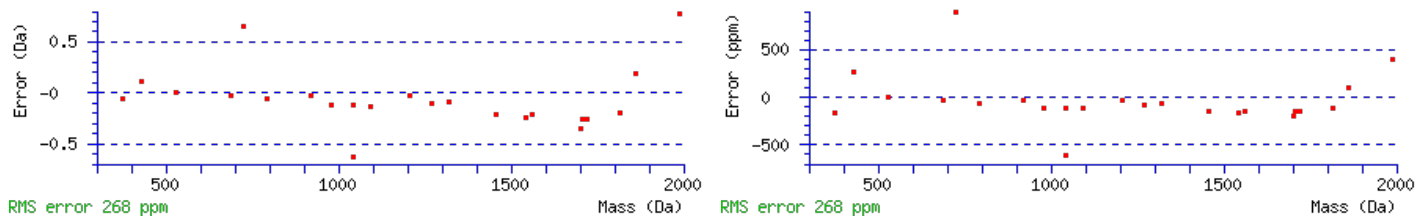

NCBI BLAST search of [AFITNFSMIIDGMTYPGIK](#)

(Parameters: blastp, nr protein database, expect=20000, no filter, PAM30)

Other BLAST [web gateways](#)

**All matches to this query**

| Score | Mr(calc)  | Delta   | Sequence                             | Site Analysis        |
|-------|-----------|---------|--------------------------------------|----------------------|
| 57.3  | 2248.1160 | 0.0076  | <a href="#">AFITNFSMIIDGMTYPGIK</a>  | Oxidation M8 100.00% |
| 13.8  | 2248.1160 | 0.0076  | <a href="#">AFITNFSMIIDGMTYPGIK</a>  | Oxidation M13 0.00%  |
| 5.6   | 2248.1310 | -0.0075 | <a href="#">MLINQHTLLFGGDTNPVHPK</a> |                      |
| 5.0   | 2248.1310 | -0.0075 | <a href="#">MLINQHTLLFGGDTNPVHPK</a> |                      |
| 3.6   | 2247.1093 | 1.0142  | <a href="#">YTMLSALAKVEDVSVDTSYR</a> |                      |
| 3.1   | 2247.1153 | 1.0082  | <a href="#">MHHLNKTHSGLIHMESIGR</a>  |                      |
| 1.1   | 2248.1158 | 0.0078  | <a href="#">KLMDDPVQTLIEGHQHDKK</a>  |                      |
| 0.6   | 2246.1154 | 2.0082  | <a href="#">KAWWEANKELTPGLTHTMER</a> |                      |
| 0.5   | 2248.1158 | 0.0078  | <a href="#">KLMDDPVQTLIEGHQHDKK</a>  |                      |
| 0.4   | 2247.1279 | 0.9956  | <a href="#">VGTLMCLHDVSDFELLEAAK</a> |                      |

Mascot: <http://www.matrixscience.com/>

# MASCOT SCIENCE Mascot Search Results

## Peptide View

MS/MS Fragmentation of **LPTQNITFQTESSVAEQEAEFQSPK**

Found in **B7ZKJ8** in **con\_Xuniprot\_HUMAN3**, B7ZKJ8\_HUMAN 35 kDa inter-alpha-trypsin inhibitor heavy chain H4 OS=Homo sapiens GN=ITIH4 PE=2 SV=1

Match to Query 25706: 2811.320892 from(938.114240,3+) intensity(18923.9219) rtinseconds(1786) scans(4639) index(6525)

Title: 111019\_Est\_ISCardio\_NMI\_YP\_G\_9Spectrum4078\_scans\_4639

Data file C:\mascot\20140703\_Tmgf\_1D\CSV\_UseAnalysis\MasterCSV\All\_Glyco\mgf\ptm\UC18ERLIC\_PTM\_35D.mgf

Click mouse within plot area to zoom in by factor of two about that point

Or, to Da

Label all possible matches Label matches used for scoring

Show Y-axis

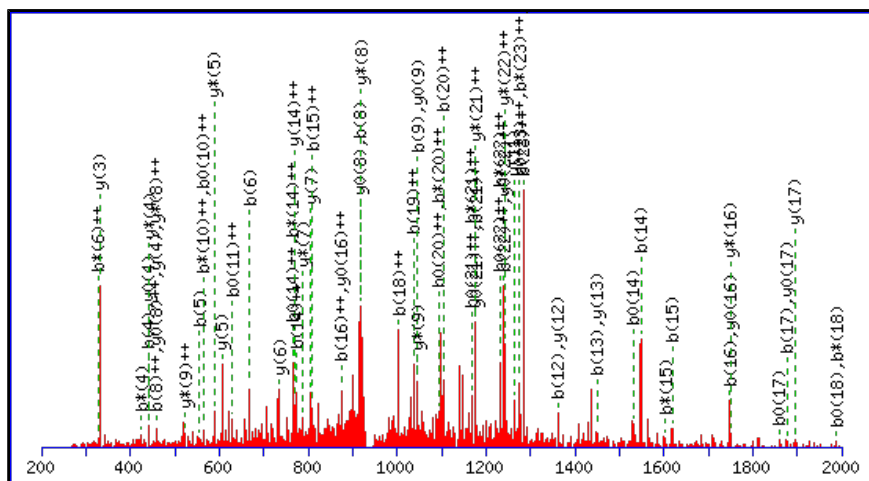

Monoisotopic mass of neutral peptide Mr(calc): 2810.3134

Fixed modifications: Carbamidomethyl (C) (apply to specified residues or termini only)

Variable modifications:

Q4 : Deamidated (NQ)

N5 : Deamidated (NQ)

Ions Score: 46 Expect: 0.0059

Matches : 71/274 fragment ions using 140 most intense peaks ([help](#))

| #  | b                | b <sup>++</sup>  | b*               | b <sup>*++</sup> | b <sup>0</sup>   | b <sup>0++</sup> | Seq. | y                | y <sup>++</sup> | y*               | y <sup>*++</sup> | y <sup>0</sup>   | y <sup>0++</sup> | #  |
|----|------------------|------------------|------------------|------------------|------------------|------------------|------|------------------|-----------------|------------------|------------------|------------------|------------------|----|
| 1  | 114.0913         | 57.5493          |                  |                  |                  |                  | L    |                  |                 |                  |                  |                  |                  | 25 |
| 2  | 211.1441         | 106.0757         |                  |                  |                  |                  | P    | 2698.2366        | 1349.6220       | 2681.2101        | 1341.1087        | 2680.2261        | 1340.6167        | 24 |
| 3  | 312.1918         | 156.5995         |                  |                  | 294.1812         | 147.5942         | T    | 2601.1839        | 1301.0956       | 2584.1573        | 1292.5823        | 2583.1733        | 1292.0903        | 23 |
| 4  | <b>441.2344</b>  | 221.1208         | <b>424.2078</b>  | 212.6076         | 423.2238         | 212.1155         | Q    | 2500.1362        | 1250.5717       | 2483.1096        | <b>1242.0585</b> | 2482.1256        | <b>1241.5664</b> | 22 |
| 5  | <b>556.2613</b>  | 278.6343         | 539.2348         | 270.1210         | 538.2508         | 269.6290         | N    | 2371.0936        | 1186.0504       | 2354.0670        | <b>1177.5372</b> | 2353.0830        | <b>1177.0452</b> | 21 |
| 6  | <b>669.3454</b>  | 335.1763         | 652.3188         | <b>326.6631</b>  | 651.3348         | 326.1710         | I    | 2256.0667        | 1128.5370       | 2239.0401        | 1120.0237        | 2238.0561        | 1119.5317        | 20 |
| 7  | 770.3931         | 385.7002         | 753.3665         | 377.1869         | 752.3825         | 376.6949         | T    | 2142.9826        | 1071.9949       | 2125.9560        | 1063.4817        | 2124.9720        | 1062.9896        | 19 |
| 8  | <b>917.4615</b>  | <b>459.2344</b>  | 900.4349         | 450.7211         | 899.4509         | 450.2291         | F    | 2041.9349        | 1021.4711       | 2024.9084        | 1012.9578        | 2023.9243        | 1012.4658        | 18 |
| 9  | <b>1045.5201</b> | 523.2637         | 1028.4935        | 514.7504         | 1027.5095        | 514.2584         | Q    | <b>1894.8665</b> | 947.9369        | 1877.8399        | 939.4236         | <b>1876.8559</b> | 938.9316         | 17 |
| 10 | 1146.5677        | 573.7875         | 1129.5412        | <b>565.2742</b>  | 1128.5572        | <b>564.7822</b>  | T    | 1766.8079        | 883.9076        | <b>1749.7814</b> | 875.3943         | <b>1748.7974</b> | <b>874.9023</b>  | 16 |
| 11 | <b>1275.6103</b> | 638.3088         | 1258.5838        | 629.7955         | 1257.5998        | <b>629.3035</b>  | E    | 1665.7602        | 833.3838        | 1648.7337        | 824.8705         | 1647.7497        | 824.3785         | 15 |
| 12 | <b>1362.6424</b> | 681.8248         | 1345.6158        | 673.3115         | 1344.6318        | 672.8195         | S    | 1536.7176        | <b>768.8625</b> | 1519.6911        | 760.3492         | 1518.7071        | 759.8572         | 14 |
| 13 | <b>1449.6744</b> | 725.3408         | 1432.6478        | 716.8276         | 1431.6638        | 716.3355         | S    | <b>1449.6856</b> | 725.3464        | 1432.6591        | 716.8332         | 1431.6751        | 716.3412         | 13 |
| 14 | <b>1548.7428</b> | <b>774.8750</b>  | 1531.7162        | <b>766.3618</b>  | <b>1530.7322</b> | <b>765.8698</b>  | V    | <b>1362.6536</b> | 681.8304        | 1345.6270        | 673.3172         | 1344.6430        | 672.8251         | 12 |
| 15 | <b>1619.7799</b> | <b>810.3936</b>  | <b>1602.7534</b> | 801.8803         | 1601.7693        | 801.3883         | A    | <b>1263.5852</b> | 632.2962        | 1246.5586        | 623.7830         | 1245.5746        | 623.2909         | 11 |
| 16 | <b>1748.8225</b> | <b>874.9149</b>  | 1731.7960        | 866.4016         | 1730.8119        | 865.9096         | E    | 1192.5481        | 596.7777        | 1175.5215        | 588.2644         | 1174.5375        | 587.7724         | 10 |
| 17 | <b>1876.8811</b> | 938.9442         | 1859.8545        | 930.4309         | <b>1858.8705</b> | 929.9389         | Q    | 1063.5055        | 532.2564        | <b>1046.4789</b> | <b>523.7431</b>  | <b>1045.4949</b> | 523.2511         | 9  |
| 18 | 2005.9237        | <b>1003.4655</b> | <b>1988.8971</b> | 994.9522         | <b>1987.9131</b> | 994.4602         | E    | 935.4469         | 468.2271        | <b>918.4203</b>  | <b>459.7138</b>  | <b>917.4363</b>  | <b>459.2218</b>  | 8  |
| 19 | 2076.9608        | <b>1038.9840</b> | 2059.9342        | 1030.4708        | 2058.9502        | 1029.9788        | A    | <b>806.4043</b>  | 403.7058        | <b>789.3777</b>  | 395.1925         | 788.3937         | 394.7005         | 7  |
| 20 | 2206.0034        | <b>1103.5053</b> | 2188.9768        | <b>1094.9921</b> | 2187.9928        | <b>1094.5000</b> | E    | <b>735.3672</b>  | 368.1872        | 718.3406         | 359.6740         | 717.3566         | 359.1819         | 6  |
| 21 | 2353.0718        | <b>1177.0395</b> | 2336.0452        | <b>1168.5263</b> | 2335.0612        | <b>1168.0343</b> | F    | <b>606.3246</b>  | 303.6659        | <b>589.2980</b>  | 295.1527         | 588.3140         | 294.6606         | 5  |

|    |           |                  |           |                  |           |                  |          |                 |          |                 |          |                 |          |          |
|----|-----------|------------------|-----------|------------------|-----------|------------------|----------|-----------------|----------|-----------------|----------|-----------------|----------|----------|
| 22 | 2481.1304 | <b>1241.0688</b> | 2464.1038 | <b>1232.5556</b> | 2463.1198 | <b>1232.0635</b> | <b>Q</b> | <b>459.2562</b> | 230.1317 | <b>442.2296</b> | 221.6185 | <b>441.2456</b> | 221.1264 | <b>4</b> |
| 23 | 2568.1624 | <b>1284.5848</b> | 2551.1359 | <b>1276.0716</b> | 2550.1518 | <b>1275.5796</b> | <b>S</b> | <b>331.1976</b> | 166.1024 | 314.1710        | 157.5892 | 313.1870        | 157.0972 | <b>3</b> |
| 24 | 2665.2152 | 1333.1112        | 2648.1886 | 1324.5979        | 2647.2046 | 1324.1059        | <b>P</b> | 244.1656        | 122.5864 | 227.1390        | 114.0731 |                 |          | <b>2</b> |
| 25 |           |                  |           |                  |           |                  | <b>K</b> | 147.1128        | 74.0600  | 130.0863        | 65.5468  |                 |          | <b>1</b> |

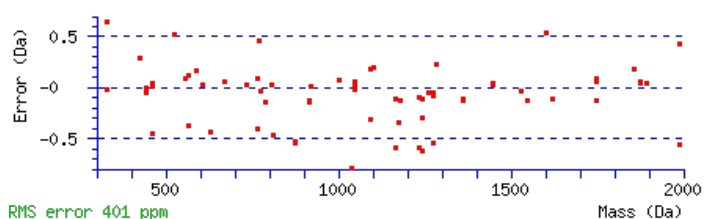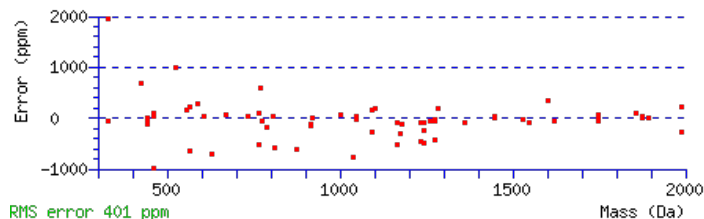

NCBI BLAST search of [LPTQNITFQTESSVAEQEAEFQSPK](#)

(Parameters: blastp, nr protein database, expect=20000, no filter, PAM30)

Other BLAST [web gateways](#)

All matches to this query

| Score | Mr(calc)  | Delta  | Sequence                                  | Site Analysis             |
|-------|-----------|--------|-------------------------------------------|---------------------------|
| 45.7  | 2810.3134 | 1.0075 | <a href="#">LPTQNITFQTESSVAEQEAEFQSPK</a> | Deamidated Q4, N5 17.35%  |
| 45.4  | 2810.3134 | 1.0075 | <a href="#">LPTQNITFQTESSVAEQEAEFQSPK</a> | Deamidated N5, Q17 15.89% |
| 45.3  | 2810.3134 | 1.0075 | <a href="#">LPTQNITFQTESSVAEQEAEFQSPK</a> | Deamidated Q4, Q17 15.86% |
| 44.7  | 2810.3134 | 1.0075 | <a href="#">LPTQNITFQTESSVAEQEAEFQSPK</a> | Deamidated Q4, Q22 13.62% |
| 44.0  | 2810.3134 | 1.0075 | <a href="#">LPTQNITFQTESSVAEQEAEFQSPK</a> | Deamidated N5, Q22 11.78% |
| 43.8  | 2810.3134 | 1.0075 | <a href="#">LPTQNITFQTESSVAEQEAEFQSPK</a> | Deamidated N5, Q9 11.05%  |
| 43.8  | 2810.3134 | 1.0075 | <a href="#">LPTQNITFQTESSVAEQEAEFQSPK</a> | Deamidated Q4, Q9 11.05%  |
| 36.2  | 2810.3134 | 1.0075 | <a href="#">LPTQNITFQTESSVAEQEAEFQSPK</a> | Deamidated Q9, Q17 1.92%  |
| 35.0  | 2810.3134 | 1.0075 | <a href="#">LPTQNITFQTESSVAEQEAEFQSPK</a> | Deamidated Q9, Q22 1.47%  |
| 14.9  | 2810.3134 | 1.0075 | <a href="#">LPTQNITFQTESSVAEQEAEFQSPK</a> | Deamidated Q17, Q22 0.01% |

Mascot: <http://www.matrixscience.com/>

# MASCOT SCIENCE Mascot Search Results

## Peptide View

MS/MS Fragmentation of **AFITNFSMIDGMTYPGHIK**

Found in **B7ZKJ8** in **con\_Xuniprot\_HUMAN3**, B7ZKJ8\_HUMAN 35 kDa inter-alpha-trypsin inhibitor heavy chain H4 OS=Homo sapiens GN=ITIH4 PE=2 SV=1

Match to Query 15116: 2264.118312 from(755.713380,3+) intensity(19407.0332) rtinseconds(2556) scans(6673) index(25634)

Title: 111019\_Est\_MI\_YS\_G\_07Spectrum5747\_scans\_6673

Data file C:\mascot\20140703\_Tmgf\_1D\CSV\_UseAnalysis\MasterCSV\All\_Glyco\mgf\ptm\UC18ERLIC\_PTM\_35D.mgf

Click mouse within plot area to zoom in by factor of two about that point

Or, to Da

Label all possible matches Label matches used for scoring

Show Y-axis

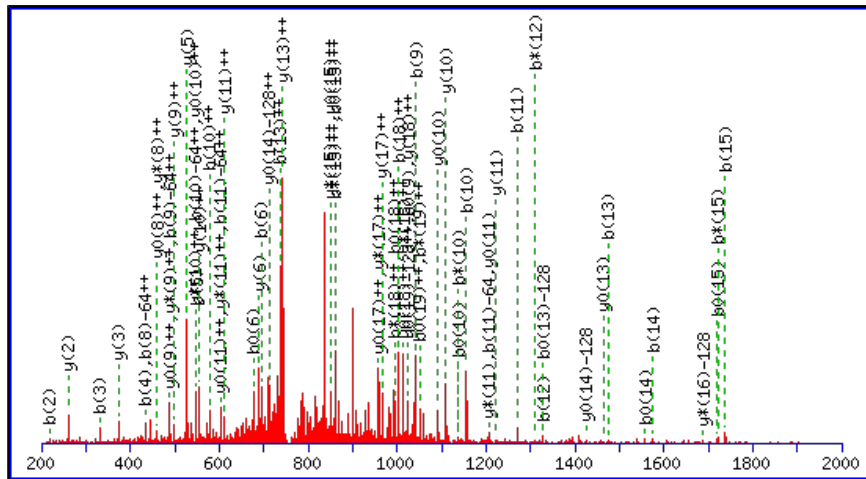

Monoisotopic mass of neutral peptide Mr(calc): 2264.1109

Fixed modifications: Carbamidomethyl (C) (apply to specified residues or termini only)

Variable modifications:

N5 : Deamidated (NQ)

M8 : Oxidation (M), with neutral losses 0.0000(shown in table), 63.9983

M13 : Oxidation (M), with neutral losses 0.0000(shown in table), 63.9983

Ions Score: 42 Expect: 0.018

Matches : 69/346 fragment ions using 117 most intense peaks ([help](#))

| #  | b                | b <sup>++</sup>  | b <sup>*</sup>   | b <sup>*++</sup> | b <sup>0</sup>   | b <sup>0++</sup> | Seq. | y                | y <sup>++</sup>  | y <sup>*</sup>   | y <sup>*++</sup> | y <sup>0</sup>   | y <sup>0++</sup> | #  |
|----|------------------|------------------|------------------|------------------|------------------|------------------|------|------------------|------------------|------------------|------------------|------------------|------------------|----|
| 1  | 72.0444          | 36.5258          |                  |                  |                  |                  | A    |                  |                  |                  |                  |                  |                  | 20 |
| 2  | <b>219.1128</b>  | 110.0600         |                  |                  |                  |                  | F    | 2194.0810        | 1097.5442        | 2177.0545        | 1089.0309        | 2176.0705        | 1088.5389        | 19 |
| 3  | <b>332.1969</b>  | 166.6021         |                  |                  |                  |                  | I    | 2047.0126        | <b>1024.0100</b> | 2029.9861        | <b>1015.4967</b> | 2029.0021        | <b>1015.0047</b> | 18 |
| 4  | <b>433.2445</b>  | 217.1259         |                  |                  | 415.2340         | 208.1206         | T    | 1933.9286        | <b>967.4679</b>  | 1916.9020        | <b>958.9546</b>  | 1915.9180        | <b>958.4626</b>  | 17 |
| 5  | <b>548.2715</b>  | 274.6394         | 531.2449         | 266.1261         | 530.2609         | 265.6341         | N    | 1832.8809        | 916.9441         | 1815.8543        | 908.4308         | 1814.8703        | 907.9388         | 16 |
| 6  | <b>695.3399</b>  | 348.1736         | 678.3134         | 339.6603         | <b>677.3293</b>  | 339.1683         | F    | 1717.8539        | 859.4306         | 1700.8274        | <b>850.9173</b>  | 1699.8434        | <b>850.4253</b>  | 15 |
| 7  | 782.3719         | 391.6896         | 765.3454         | 383.1763         | 764.3614         | 382.6843         | S    | 1570.7855        | 785.8964         | 1553.7590        | 777.3831         | 1552.7750        | 776.8911         | 14 |
| 8  | 929.4073         | 465.2073         | 912.3808         | 456.6940         | 911.3968         | 456.2020         | M    | 1483.7535        | <b>742.3804</b>  | 1466.7270        | 733.8671         | <b>1465.7429</b> | 733.3751         | 13 |
| 9  | <b>1042.4914</b> | 521.7493         | 1025.4648        | 513.2361         | <b>1024.4808</b> | 512.7441         | I    | 1336.7181        | 668.8627         | 1319.6916        | 660.3494         | 1318.7075        | 659.8574         | 12 |
| 10 | <b>1155.5755</b> | <b>578.2914</b>  | <b>1138.5489</b> | 569.7781         | <b>1137.5649</b> | 569.2861         | I    | <b>1223.6340</b> | <b>612.3207</b>  | <b>1206.6075</b> | <b>603.8074</b>  | <b>1205.6235</b> | <b>603.3154</b>  | 11 |
| 11 | <b>1270.6024</b> | 635.8048         | 1253.5759        | 627.2916         | 1252.5918        | 626.7996         | D    | <b>1110.5500</b> | <b>555.7786</b>  | 1093.5234        | <b>547.2654</b>  | <b>1092.5394</b> | <b>546.7733</b>  | 10 |
| 12 | <b>1327.6239</b> | 664.3156         | <b>1310.5973</b> | 655.8023         | 1309.6133        | 655.3103         | G    | 995.5230         | <b>498.2652</b>  | 978.4965         | <b>489.7519</b>  | 977.5125         | <b>489.2599</b>  | 9  |
| 13 | <b>1474.6593</b> | <b>737.8333</b>  | 1457.6327        | 729.3200         | 1456.6487        | 728.8280         | M    | 938.5016         | 469.7544         | 921.4750         | <b>461.2411</b>  | 920.4910         | <b>460.7491</b>  | 8  |
| 14 | <b>1575.7069</b> | 788.3571         | 1558.6804        | 779.8438         | <b>1557.6964</b> | 779.3518         | T    | 791.4662         | 396.2367         | 774.4396         | 387.7234         | 773.4556         | 387.2314         | 7  |
| 15 | <b>1738.7703</b> | 869.8888         | <b>1721.7437</b> | <b>861.3755</b>  | <b>1720.7597</b> | <b>860.8835</b>  | Y    | <b>690.4185</b>  | 345.7129         | 673.3919         | 337.1996         |                  |                  | 6  |
| 16 | 1835.8230        | 918.4152         | 1818.7965        | 909.9019         | 1817.8125        | 909.4099         | P    | <b>527.3552</b>  | 264.1812         | 510.3286         | 255.6679         |                  |                  | 5  |
| 17 | 1892.8445        | 946.9259         | 1875.8180        | 938.4126         | 1874.8339        | 937.9206         | G    | 430.3024         | 215.6548         | 413.2758         | 207.1416         |                  |                  | 4  |
| 18 | 2005.9286        | <b>1003.4679</b> | 1988.9020        | <b>994.9546</b>  | 1987.9180        | <b>994.4626</b>  | I    | <b>373.2809</b>  | 187.1441         | 356.2544         | 178.6308         |                  |                  | 3  |
| 19 | 2119.0126        | 1060.0100        | 2101.9861        | <b>1051.4967</b> | 2101.0021        | <b>1051.0047</b> | I    | <b>260.1969</b>  | 130.6021         | 243.1703         | 122.0888         |                  |                  | 2  |
| 20 |                  |                  |                  |                  |                  |                  | K    | 147.1128         | 74.0600          | 130.0863         | 65.5468          |                  |                  | 1  |

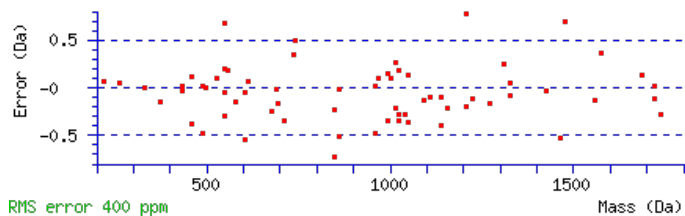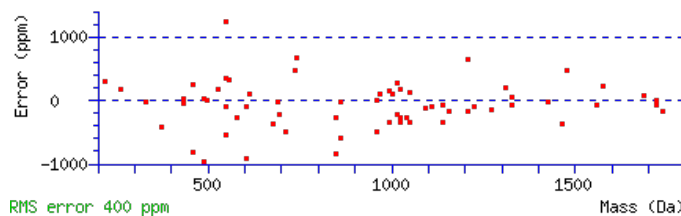

NCBI BLAST search of [AFITNFESMIIDGMTYPGIK](#)

(Parameters: blastp, nr protein database, expect=20000, no filter, PAM30)

Other BLAST [web gateways](#)

**All matches to this query**

| Score | Mr(calc)  | Delta  | Sequence                                |
|-------|-----------|--------|-----------------------------------------|
| 42.1  | 2264.1109 | 0.0074 | <a href="#">AFITNFESMIIDGMTYPGIK</a>    |
| 4.5   | 2263.1188 | 0.9995 | <a href="#">EKTVVVTMSMTPTAAAEGSSPLR</a> |
| 3.4   | 2263.1253 | 0.9930 | <a href="#">NITSCIVTSDLPLSASLTQNK</a>   |
| 3.2   | 2263.1228 | 0.9955 | <a href="#">FVIMCTEPDVGQLSVAQQLK</a>    |
| 2.3   | 2262.1024 | 2.0159 | <a href="#">VKDGGKWDEMEILLETPGMR</a>    |
| 1.1   | 2262.1058 | 2.0125 | <a href="#">ILVMHIPDSISLMTTSDAMR</a>    |
| 1.0   | 2263.1120 | 1.0063 | <a href="#">QEIEDRLNTWVVFNEKNK</a>      |
| 1.0   | 2263.1120 | 1.0063 | <a href="#">QEIEDRLNTWVVFNEKNK</a>      |
| 1.0   | 2263.1120 | 1.0063 | <a href="#">QEIEDRLNTWVVFNEKNK</a>      |
| 1.0   | 2263.1120 | 1.0063 | <a href="#">QEIEDRLNTWVVFNEKNK</a>      |

Mascot: <http://www.matrixscience.com/>

# MASCOT SCIENCE Mascot Search Results

## Peptide View

MS/MS Fragmentation of **VSTVYANNGSVLQGTSVASVYHGK**

Found in **Q15166** in **con\_Xuniprot\_HUMAN3**, PON3\_HUMAN Serum paraoxonase/lactonase 3 OS=Homo sapiens GN=PON3 PE=1 SV=3

Match to Query 21505: 2438.214192 from(813.745340,3+) intensity(49160.6328) rtinseconds(1308) scans(3166) index(26562)

Title: 111019\_Est\_MI\_YS\_G\_09Spectrum2731\_scans\_3166

Data file C:\\mascot\\20140703\_Tmgf\_1D\\CSV\_UseAnalysis\\MasterCSV\\All\_Glyco\\mgf\\ptm\\UC18ERLIC\_PTM\_35D.mgf

Click mouse within plot area to zoom in by factor of two about that point

Or, to Da

Label all possible matches Label matches used for scoring

Show Y-axis

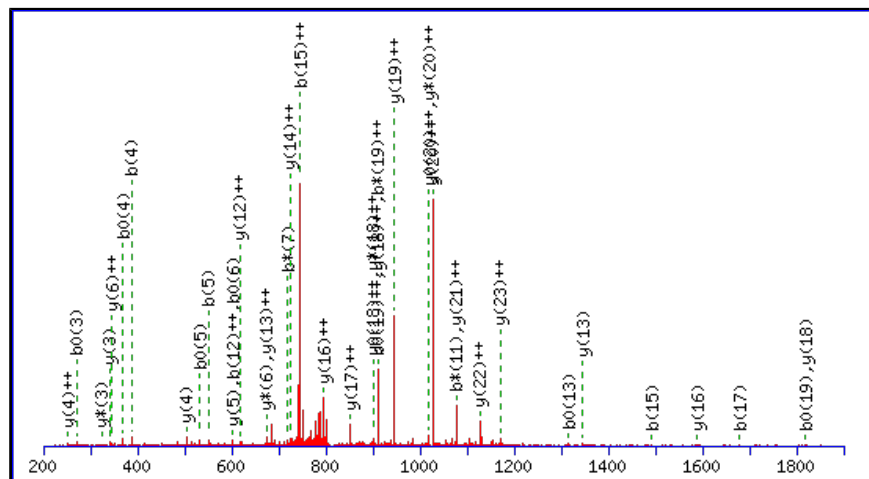

Monoisotopic mass of neutral peptide Mr(calc): 2438.2078

Fixed modifications: Carbamidomethyl (C) (apply to specified residues or termini only)

Variable modifications:

N8 : Deamidated (NQ)

Ions Score: 65 Expect: 9.1e-005

Matches : 41/252 fragment ions using 66 most intense peaks ([help](#))

| #  | b         | b <sup>++</sup> | b <sup>*</sup> | b <sup>*++</sup> | b <sup>0</sup> | b <sup>0++</sup> | Seq. | y         | y <sup>++</sup> | y <sup>*</sup> | y <sup>*++</sup> | y <sup>0</sup> | y <sup>0++</sup> | #  |
|----|-----------|-----------------|----------------|------------------|----------------|------------------|------|-----------|-----------------|----------------|------------------|----------------|------------------|----|
| 1  | 100.0757  | 50.5415         |                |                  |                |                  | V    |           |                 |                |                  |                |                  | 24 |
| 2  | 187.1077  | 94.0575         |                |                  | 169.0972       | 85.0522          | S    | 2340.1466 | 1170.5770       | 2323.1201      | 1162.0637        | 2322.1361      | 1161.5717        | 23 |
| 3  | 288.1554  | 144.5813        |                |                  | 270.1448       | 135.5761         | T    | 2253.1146 | 1127.0609       | 2236.0881      | 1118.5477        | 2235.1040      | 1118.0557        | 22 |
| 4  | 387.2238  | 194.1155        |                |                  | 369.2132       | 185.1103         | V    | 2152.0669 | 1076.5371       | 2135.0404      | 1068.0238        | 2134.0564      | 1067.5318        | 21 |
| 5  | 550.2871  | 275.6472        |                |                  | 532.2766       | 266.6419         | Y    | 2052.9985 | 1027.0029       | 2035.9720      | 1018.4896        | 2034.9879      | 1017.9976        | 20 |
| 6  | 621.3243  | 311.1658        |                |                  | 603.3137       | 302.1605         | A    | 1889.9352 | 945.4712        | 1872.9086      | 936.9580         | 1871.9246      | 936.4659         | 19 |
| 7  | 735.3672  | 368.1872        | 718.3406       | 359.6740         | 717.3566       | 359.1819         | N    | 1818.8981 | 909.9527        | 1801.8715      | 901.4394         | 1800.8875      | 900.9474         | 18 |
| 8  | 850.3941  | 425.7007        | 833.3676       | 417.1874         | 832.3836       | 416.6954         | N    | 1704.8551 | 852.9312        | 1687.8286      | 844.4179         | 1686.8446      | 843.9259         | 17 |
| 9  | 907.4156  | 454.2114        | 890.3890       | 445.6982         | 889.4050       | 445.2061         | G    | 1589.8282 | 795.4177        | 1572.8016      | 786.9045         | 1571.8176      | 786.4125         | 16 |
| 10 | 994.4476  | 497.7274        | 977.4211       | 489.2142         | 976.4371       | 488.7222         | S    | 1532.8067 | 766.9070        | 1515.7802      | 758.3937         | 1514.7962      | 757.9017         | 15 |
| 11 | 1093.5160 | 547.2617        | 1076.4895      | 538.7484         | 1075.5055      | 538.2564         | V    | 1445.7747 | 723.3910        | 1428.7482      | 714.8777         | 1427.7641      | 714.3857         | 14 |
| 12 | 1206.6001 | 603.8037        | 1189.5735      | 595.2904         | 1188.5895      | 594.7984         | L    | 1346.7063 | 673.8568        | 1329.6797      | 665.3435         | 1328.6957      | 664.8515         | 13 |
| 13 | 1334.6587 | 667.8330        | 1317.6321      | 659.3197         | 1316.6481      | 658.8277         | Q    | 1233.6222 | 617.3148        | 1216.5957      | 608.8015         | 1215.6117      | 608.3095         | 12 |
| 14 | 1391.6801 | 696.3437        | 1374.6536      | 687.8304         | 1373.6696      | 687.3384         | G    | 1105.5637 | 553.2855        | 1088.5371      | 544.7722         | 1087.5531      | 544.2802         | 11 |
| 15 | 1492.7278 | 746.8675        | 1475.7013      | 738.3543         | 1474.7172      | 737.8623         | T    | 1048.5422 | 524.7747        | 1031.5156      | 516.2615         | 1030.5316      | 515.7694         | 10 |
| 16 | 1579.7598 | 790.3836        | 1562.7333      | 781.8703         | 1561.7493      | 781.3783         | S    | 947.4945  | 474.2509        | 930.4680       | 465.7376         | 929.4839       | 465.2456         | 9  |
| 17 | 1678.8283 | 839.9178        | 1661.8017      | 831.4045         | 1660.8177      | 830.9125         | V    | 860.4625  | 430.7349        | 843.4359       | 422.2216         | 842.4519       | 421.7296         | 8  |
| 18 | 1749.8654 | 875.4363        | 1732.8388      | 866.9230         | 1731.8548      | 866.4310         | A    | 761.3941  | 381.2007        | 744.3675       | 372.6874         | 743.3835       | 372.1954         | 7  |
| 19 | 1836.8974 | 918.9523        | 1819.8709      | 910.4391         | 1818.8868      | 909.9471         | S    | 690.3570  | 345.6821        | 673.3304       | 337.1688         | 672.3464       | 336.6768         | 6  |
| 20 | 1935.9658 | 968.4865        | 1918.9393      | 959.9733         | 1917.9552      | 959.4813         | V    | 603.3249  | 302.1661        | 586.2984       | 293.6528         |                |                  | 5  |
| 21 | 2099.0291 | 1050.0182       | 2082.0026      | 1041.5049        | 2081.0186      | 1041.0129        | Y    | 504.2565  | 252.6319        | 487.2300       | 244.1186         |                |                  | 4  |
| 22 | 2236.0881 | 1118.5477       | 2219.0615      | 1110.0344        | 2218.0775      | 1109.5424        | H    | 341.1932  | 171.1002        | 324.1666       | 162.5870         |                |                  | 3  |
| 23 | 2293.1095 | 1147.0584       | 2276.0830      | 1138.5451        | 2275.0990      | 1138.0531        | G    | 204.1343  | 102.5708        | 187.1077       | 94.0575          |                |                  | 2  |



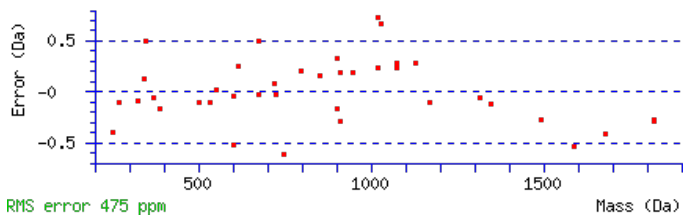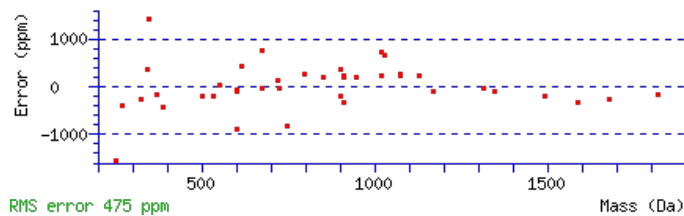

NCBI BLAST search of [VSTVYANNGSVLQGTSVASVYHGK](#)  
 (Parameters: blastp, nr protein database, expect=20000, no filter, PAM30)  
 Other BLAST [web gateways](#)

All matches to this query

| Score | Mr(calc)  | Delta   | Sequence                                 | Site Analysis         |
|-------|-----------|---------|------------------------------------------|-----------------------|
| 64.8  | 2438.2078 | 0.0064  | <a href="#">VSTVYANNGSVLQGTSVASVYHGK</a> | Deamidated N8 33.33%  |
| 64.8  | 2438.2078 | 0.0064  | <a href="#">VSTVYANNGSVLQGTSVASVYHGK</a> | Deamidated N7 33.33%  |
| 64.8  | 2438.2078 | 0.0064  | <a href="#">VSTVYANNGSVLQGTSVASVYHGK</a> | Deamidated Q13 33.33% |
| 14.4  | 2438.2151 | -0.0009 | <a href="#">LNPEMLQIAQDTGKLNVA YER</a>   |                       |
| 6.2   | 2438.2151 | -0.0009 | <a href="#">LNPEMLQIAQDTGKLNVA YER</a>   |                       |
| 6.2   | 2438.2151 | -0.0009 | <a href="#">LNPEMLQIAQDTGKLNVA YER</a>   |                       |
| 6.2   | 2438.2086 | 0.0056  | <a href="#">FQLCVLGQNAQTMAYNITPLR</a>    |                       |
| 4.4   | 2438.2138 | 0.0004  | <a href="#">KWFCNGRGNTSGSHIVNHLVR</a>    |                       |
| 4.3   | 2438.2151 | -0.0009 | <a href="#">LNPEMLQIAQDTGKLNVA YER</a>   |                       |
| 4.3   | 2438.2151 | -0.0009 | <a href="#">LNPEMLQIAQDTGKLNVA YER</a>   |                       |

Mascot: <http://www.matrixscience.com/>

# MASCOT SCIENCE Mascot Search Results

## Peptide View

MS/MS Fragmentation of **WEYCNLTR**

Found in **P08519** in **con\_Xuniprot\_HUMAN3**, APOA\_HUMAN Apolipoprotein(a) OS=Homo sapiens GN=LPA PE=1 SV=1

Match to Query 1536: 1141.488348 from(571.751450,2+) intensity(48562.1445) rtinseconds(1067) scans(2302) index(11658)

Title: 111019\_Est\_ISCardio\_NMI\_YS\_G\_8Spectrum1972\_scans\_\_2302

Data file C:\mascot\20140703\_Tmgf\_1D\CSV\_UseAnalysis\MasterCSV\All\_Glyco\mgf\ptm\UC18ERLIC\_PTM\_35D.mgf

Click mouse within plot area to zoom in by factor of two about that point

Or, to Da

Label all possible matches Label matches used for scoring

Show Y-axis

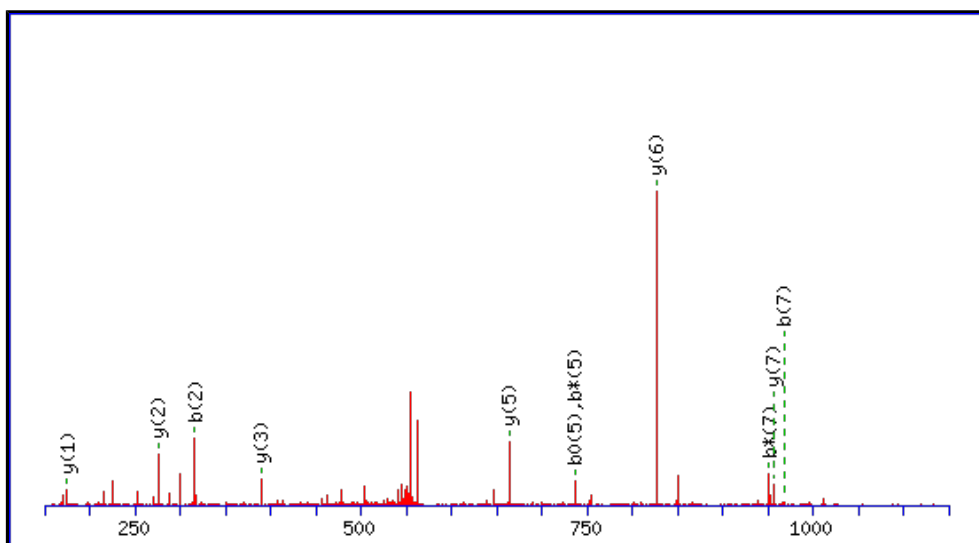

Monoisotopic mass of neutral peptide  $M_r(\text{calc})$ : 1141.4862

Fixed modifications: Carbamidomethyl (C) (apply to specified residues or termini only)

Variable modifications:

N5 : Deamidated (NQ)

Ions Score: 41 Expect: 0.0034

Matches : 11/72 fragment ions using 20 most intense peaks ([help](#))

| # | b               | b <sup>++</sup> | b <sup>*</sup>  | b <sup>***</sup> | b <sup>0</sup>  | b <sup>0++</sup> | Seq. | y               | y <sup>++</sup> | y <sup>*</sup> | y <sup>***</sup> | y <sup>0</sup> | y <sup>0++</sup> | # |
|---|-----------------|-----------------|-----------------|------------------|-----------------|------------------|------|-----------------|-----------------|----------------|------------------|----------------|------------------|---|
| 1 | 187.0866        | 94.0469         |                 |                  |                 |                  | W    |                 |                 |                |                  |                |                  | 8 |
| 2 | <b>316.1292</b> | 158.5682        |                 |                  | 298.1186        | 149.5629         | E    | <b>956.4142</b> | 478.7107        | 939.3877       | 470.1975         | 938.4036       | 469.7055         | 7 |
| 3 | 479.1925        | 240.0999        |                 |                  | 461.1819        | 231.0946         | Y    | <b>827.3716</b> | 414.1894        | 810.3451       | 405.6762         | 809.3611       | 405.1842         | 6 |
| 4 | 639.2232        | 320.1152        |                 |                  | 621.2126        | 311.1099         | C    | <b>664.3083</b> | 332.6578        | 647.2817       | 324.1445         | 646.2977       | 323.6525         | 5 |
| 5 | 754.2501        | 377.6287        | <b>737.2236</b> | 369.1154         | <b>736.2395</b> | 368.6234         | N    | 504.2776        | 252.6425        | 487.2511       | 244.1292         | 486.2671       | 243.6372         | 4 |
| 6 | 867.3342        | 434.1707        | 850.3076        | 425.6574         | 849.3236        | 425.1654         | L    | <b>389.2507</b> | 195.1290        | 372.2241       | 186.6157         | 371.2401       | 186.1237         | 3 |
| 7 | <b>968.3818</b> | 484.6946        | <b>951.3553</b> | 476.1813         | 950.3713        | 475.6893         | T    | <b>276.1666</b> | 138.5870        | 259.1401       | 130.0737         | 258.1561       | 129.5817         | 2 |
| 8 |                 |                 |                 |                  |                 |                  | R    | <b>175.1190</b> | 88.0631         | 158.0924       | 79.5498          |                |                  | 1 |

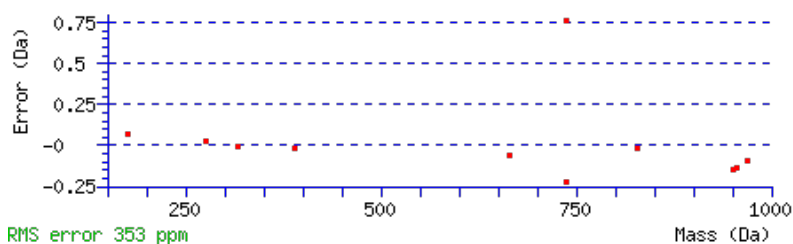

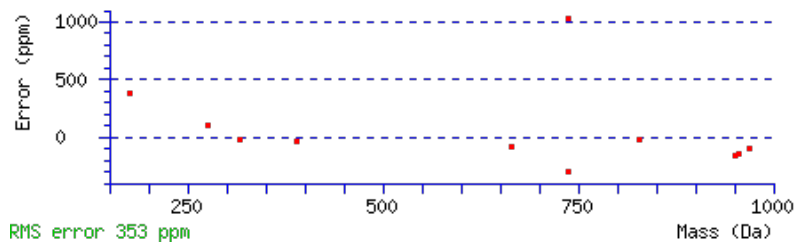

NCBI **BLAST** search of [WEYCNLTR](#)

(Parameters: blastp, nr protein database, expect=20000, no filter, PAM30)

Other BLAST [web gateways](#)

**All matches to this query**

| Score | Mr(calc)  | Delta   | Sequence                   |
|-------|-----------|---------|----------------------------|
| 41.5  | 1141.4862 | 0.0021  | <a href="#">WEYCNLTR</a>   |
| 13.8  | 1141.4896 | -0.0013 | <a href="#">DAIECFMTR</a>  |
| 3.2   | 1141.4896 | -0.0013 | <a href="#">MSGSTPFQMR</a> |
| 2.8   | 1141.4862 | 0.0021  | <a href="#">DSLGWMFNR</a>  |
| 2.3   | 1139.4838 | 2.0045  | <a href="#">AIEMEMQOK</a>  |
| 1.9   | 1140.4903 | 0.9980  | <a href="#">QMSLMNETR</a>  |
| 0.3   | 1140.4845 | 1.0039  | <a href="#">CHYMENLR</a>   |

Mascot: <http://www.matrixscience.com/>

# MASCOT SCIENCE Mascot Search Results

## Peptide View

MS/MS Fragmentation of **TELFSSSCP GGIMLNETGQGYQR**

Found in **O95445** in **con\_Xuniprot\_HUMAN3**, APOM\_HUMAN Apolipoprotein M OS=Homo sapiens GN=APOM PE=1 SV=2

Match to Query 21827: 2532.132008 from(1267.073280,2+) intensity(55107.6602) rtinseconds(1702) scans(4021) index(11825)

Title: 111019\_Est\_ISCardio\_NMI\_YS\_G\_8Spectrum3437\_scans\_4021

Data file C:\mascot\20140703\_Tmgf\_1D\CSV\_UseAnalysis\MasterCSV\All\_Glyco\mgf\ptm\UC18ERLIC\_PTM\_35D.mgf

Click mouse within plot area to zoom in by factor of two about that point

Or,  to  Da

Label all possible matches  Label matches used for scoring

Show Y-axis

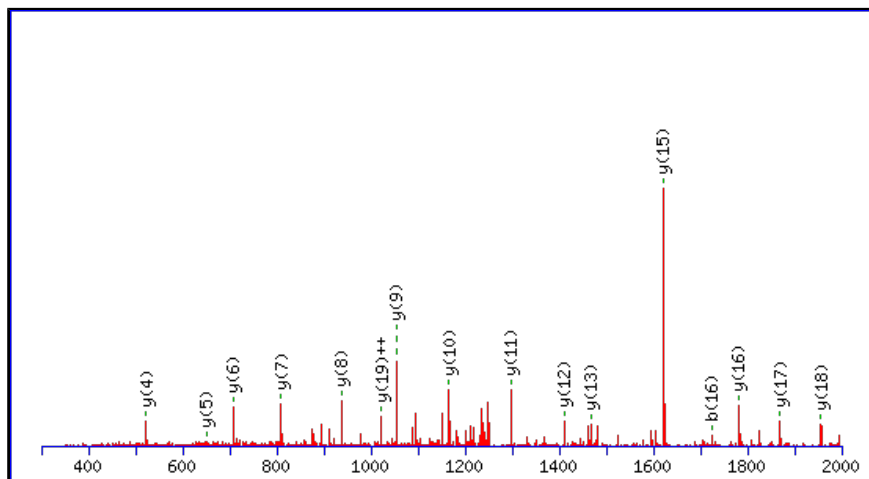

Monoisotopic mass of neutral peptide Mr(calc): 2532.1261

Fixed modifications: Carbamidomethyl (C) (apply to specified residues or termini only)

Variable modifications:

N15 : Deamidated (NQ)

Ions Score: 127 Expect: 2.7e-011

Matches : 16/224 fragment ions using 17 most intense peaks ([help](#))

| #  | b         | b <sup>++</sup> | b <sup>*</sup> | b <sup>*++</sup> | b <sup>0</sup> | b <sup>0++</sup> | Seq. | y         | y <sup>++</sup> | y <sup>*</sup> | y <sup>*++</sup> | y <sup>0</sup> | y <sup>0++</sup> | #  |
|----|-----------|-----------------|----------------|------------------|----------------|------------------|------|-----------|-----------------|----------------|------------------|----------------|------------------|----|
| 1  | 102.0550  | 51.5311         |                |                  | 84.0444        | 42.5258          | T    |           |                 |                |                  |                |                  | 23 |
| 2  | 231.0975  | 116.0524        |                |                  | 213.0870       | 107.0471         | E    | 2432.0857 | 1216.5465       | 2415.0591      | 1208.0332        | 2414.0751      | 1207.5412        | 22 |
| 3  | 344.1816  | 172.5944        |                |                  | 326.1710       | 163.5892         | L    | 2303.0431 | 1152.0252       | 2286.0165      | 1143.5119        | 2285.0325      | 1143.0199        | 21 |
| 4  | 491.2500  | 246.1287        |                |                  | 473.2395       | 237.1234         | F    | 2189.9590 | 1095.4832       | 2172.9325      | 1086.9699        | 2171.9485      | 1086.4779        | 20 |
| 5  | 578.2821  | 289.6447        |                |                  | 560.2715       | 280.6394         | S    | 2042.8906 | 1021.9489       | 2025.8641      | 1013.4357        | 2024.8801      | 1012.9437        | 19 |
| 6  | 665.3141  | 333.1607        |                |                  | 647.3035       | 324.1554         | S    | 1955.8586 | 978.4329        | 1938.8320      | 969.9197         | 1937.8480      | 969.4277         | 18 |
| 7  | 752.3461  | 376.6767        |                |                  | 734.3355       | 367.6714         | S    | 1868.8266 | 934.9169        | 1851.8000      | 926.4036         | 1850.8160      | 925.9116         | 17 |
| 8  | 912.3768  | 456.6920        |                |                  | 894.3662       | 447.6867         | C    | 1781.7945 | 891.4009        | 1764.7680      | 882.8876         | 1763.7840      | 882.3956         | 16 |
| 9  | 1009.4295 | 505.2184        |                |                  | 991.4190       | 496.2131         | P    | 1621.7639 | 811.3856        | 1604.7373      | 802.8723         | 1603.7533      | 802.3803         | 15 |
| 10 | 1066.4510 | 533.7291        |                |                  | 1048.4404      | 524.7238         | G    | 1524.7111 | 762.8592        | 1507.6846      | 754.3459         | 1506.7006      | 753.8539         | 14 |
| 11 | 1123.4725 | 562.2399        |                |                  | 1105.4619      | 553.2346         | G    | 1467.6897 | 734.3485        | 1450.6631      | 725.8352         | 1449.6791      | 725.3432         | 13 |
| 12 | 1236.5565 | 618.7819        |                |                  | 1218.5459      | 609.7766         | I    | 1410.6682 | 705.8377        | 1393.6416      | 697.3245         | 1392.6576      | 696.8325         | 12 |
| 13 | 1367.5970 | 684.3021        |                |                  | 1349.5864      | 675.2969         | M    | 1297.5841 | 649.2957        | 1280.5576      | 640.7824         | 1279.5736      | 640.2904         | 11 |
| 14 | 1480.6811 | 740.8442        |                |                  | 1462.6705      | 731.8389         | L    | 1166.5436 | 583.7755        | 1149.5171      | 575.2622         | 1148.5331      | 574.7702         | 10 |
| 15 | 1595.7080 | 798.3576        | 1578.6815      | 789.8444         | 1577.6974      | 789.3524         | N    | 1053.4596 | 527.2334        | 1036.4330      | 518.7202         | 1035.4490      | 518.2281         | 9  |
| 16 | 1724.7506 | 862.8789        | 1707.7241      | 854.3657         | 1706.7400      | 853.8737         | E    | 938.4326  | 469.7200        | 921.4061       | 461.2067         | 920.4221       | 460.7147         | 8  |
| 17 | 1825.7983 | 913.4028        | 1808.7717      | 904.8895         | 1807.7877      | 904.3975         | T    | 809.3900  | 405.1987        | 792.3635       | 396.6854         | 791.3795       | 396.1934         | 7  |
| 18 | 1882.8197 | 941.9135        | 1865.7932      | 933.4002         | 1864.8092      | 932.9082         | G    | 708.3424  | 354.6748        | 691.3158       | 346.1615         |                |                  | 6  |
| 19 | 2010.8783 | 1005.9428       | 1993.8518      | 997.4295         | 1992.8678      | 996.9375         | Q    | 651.3209  | 326.1641        | 634.2944       | 317.6508         |                |                  | 5  |
| 20 | 2067.8998 | 1034.4535       | 2050.8732      | 1025.9403        | 2049.8892      | 1025.4482        | G    | 523.2623  | 262.1348        | 506.2358       | 253.6215         |                |                  | 4  |
| 21 | 2230.9631 | 1115.9852       | 2213.9366      | 1107.4719        | 2212.9525      | 1106.9799        | Y    | 466.2409  | 233.6241        | 449.2143       | 225.1108         |                |                  | 3  |
| 22 | 2359.0217 | 1180.0145       | 2341.9951      | 1171.5012        | 2341.0111      | 1171.0092        | Q    | 303.1775  | 152.0924        | 286.1510       | 143.5791         |                |                  | 2  |
| 23 |           |                 |                |                  |                |                  | R    | 175.1190  | 88.0631         | 158.0924       | 79.5498          |                |                  | 1  |

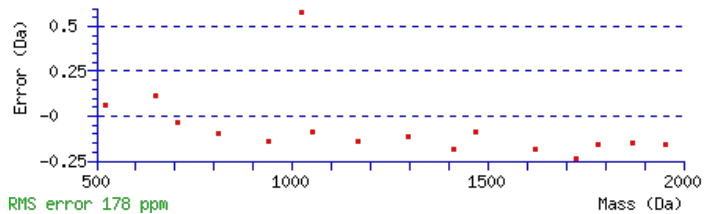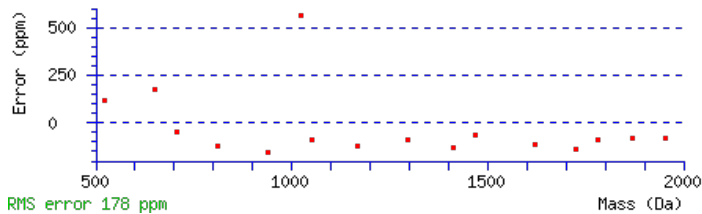

NCBI **BLAST** search of [TELFSSSCP GGIMLNETGQGYQR](#)  
 (Parameters: blastp, nr protein database, expect=20000, no filter, PAM30)  
 Other BLAST [web gateways](#)

**All matches to this query**

| Score | Mr(calc)  | Delta   | Sequence                                 | Site Analysis         |
|-------|-----------|---------|------------------------------------------|-----------------------|
| 127.1 | 2532.1261 | 0.0059  | <a href="#">TELFSSSCP GGIMLNETGQGYQR</a> | Deamidated N15 99.98% |
| 89.8  | 2532.1261 | 0.0059  | <a href="#">TELFSSSCP GGIMLNETGQGYQR</a> | Deamidated Q19 0.02%  |
| 75.8  | 2532.1261 | 0.0059  | <a href="#">TELFSSSCP GGIMLNETGQGYQR</a> | Deamidated Q22 0.00%  |
| 3.4   | 2532.1334 | -0.0014 | <a href="#">GMDTYIEIARMLCNIAESWNK</a>    |                       |
| 2.5   | 2530.1169 | 2.0151  | <a href="#">LGKADETKDEQFEQCVQNFNK</a>    |                       |
| 2.5   | 2530.1169 | 2.0151  | <a href="#">LGKADETKDEQFEQCVQNFNK</a>    |                       |

Mascot: <http://www.matrixscience.com/>

# MASCOT SCIENCE Mascot Search Results

## Peptide View

MS/MS Fragmentation of **TELFSSSCP GGIMLNETGQGYQR**

Found in **O95445** in **con\_Xuniprot\_HUMAN3**, APOM\_HUMAN Apolipoprotein M OS=Homo sapiens GN=APOM PE=1 SV=2

Match to Query 21917: 2548.131548 from(1275.073050,2+) intensity(25419.6875) rtinseconds(1533) scans(3716) index(23213)

Title: 111019\_Est\_MI\_YS\_G\_04Spectrum3183\_scans\_\_3716

Data file C:\mascot\20140703\_Tmgf\_1D\CSV\_UseAnalysis\MasterCSV\All\_Glyco\mgf\ptm\UC18ERLIC\_PTM\_35D.mgf

Click mouse within plot area to zoom in by factor of two about that point

Or,  to  Da

Label all possible matches  Label matches used for scoring

Show Y-axis

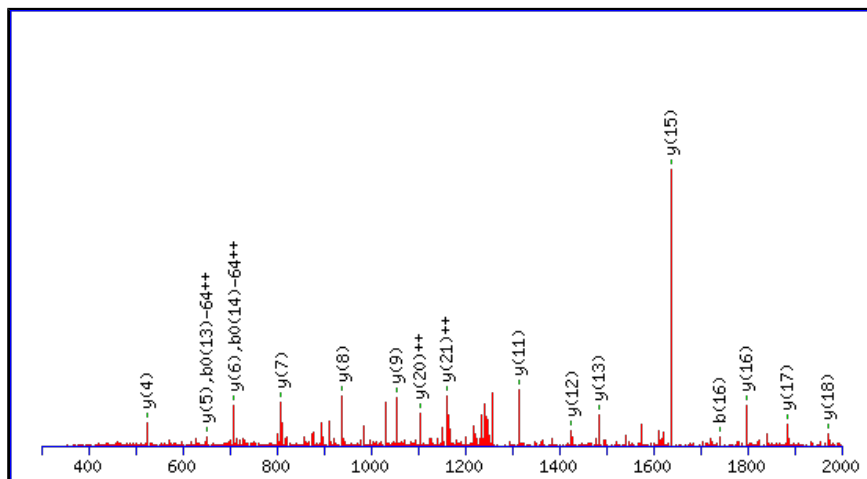

Monoisotopic mass of neutral peptide Mr(calc): 2548.1210

Fixed modifications: Carbamidomethyl (C) (apply to specified residues or termini only)

Variable modifications:

M13 : Oxidation (M), with neutral losses 0.0000(shown in table), 63.9983

N15 : Deamidated (NQ)

Ions Score: 120 Expect: 1.2e-010

Matches : 18/352 fragment ions using 17 most intense peaks ([help](#))

| #  | b         | b <sup>++</sup> | b*        | b <sup>*++</sup> | b <sup>0</sup> | b <sup>0++</sup> | Seq. | y         | y <sup>++</sup> | y*        | y <sup>*++</sup> | y <sup>0</sup> | y <sup>0++</sup> | #  |
|----|-----------|-----------------|-----------|------------------|----------------|------------------|------|-----------|-----------------|-----------|------------------|----------------|------------------|----|
| 1  | 102.0550  | 51.5311         |           |                  | 84.0444        | 42.5258          | T    |           |                 |           |                  |                |                  | 23 |
| 2  | 231.0975  | 116.0524        |           |                  | 213.0870       | 107.0471         | E    | 2448.0806 | 1224.5439       | 2431.0541 | 1216.0307        | 2430.0700      | 1215.5387        | 22 |
| 3  | 344.1816  | 172.5944        |           |                  | 326.1710       | 163.5892         | L    | 2319.0380 | 1160.0226       | 2302.0115 | 1151.5094        | 2301.0274      | 1151.0174        | 21 |
| 4  | 491.2500  | 246.1287        |           |                  | 473.2395       | 237.1234         | F    | 2205.9539 | 1103.4806       | 2188.9274 | 1094.9673        | 2187.9434      | 1094.4753        | 20 |
| 5  | 578.2821  | 289.6447        |           |                  | 560.2715       | 280.6394         | S    | 2058.8855 | 1029.9464       | 2041.8590 | 1021.4331        | 2040.8750      | 1020.9411        | 19 |
| 6  | 665.3141  | 333.1607        |           |                  | 647.3035       | 324.1554         | S    | 1971.8535 | 986.4304        | 1954.8270 | 977.9171         | 1953.8429      | 977.4251         | 18 |
| 7  | 752.3461  | 376.6767        |           |                  | 734.3355       | 367.6714         | S    | 1884.8215 | 942.9144        | 1867.7949 | 934.4011         | 1866.8109      | 933.9091         | 17 |
| 8  | 912.3768  | 456.6920        |           |                  | 894.3662       | 447.6867         | C    | 1797.7894 | 899.3984        | 1780.7629 | 890.8851         | 1779.7789      | 890.3931         | 16 |
| 9  | 1009.4295 | 505.2184        |           |                  | 991.4190       | 496.2131         | P    | 1637.7588 | 819.3830        | 1620.7323 | 810.8698         | 1619.7482      | 810.3778         | 15 |
| 10 | 1066.4510 | 533.7291        |           |                  | 1048.4404      | 524.7238         | G    | 1540.7060 | 770.8567        | 1523.6795 | 762.3434         | 1522.6955      | 761.8514         | 14 |
| 11 | 1123.4725 | 562.2399        |           |                  | 1105.4619      | 553.2346         | G    | 1483.6846 | 742.3459        | 1466.6580 | 733.8326         | 1465.6740      | 733.3406         | 13 |
| 12 | 1236.5565 | 618.7819        |           |                  | 1218.5459      | 609.7766         | I    | 1426.6631 | 713.8352        | 1409.6366 | 705.3219         | 1408.6525      | 704.8299         | 12 |
| 13 | 1383.5919 | 692.2996        |           |                  | 1365.5813      | 683.2943         | M    | 1313.5790 | 657.2932        | 1296.5525 | 648.7799         | 1295.5685      | 648.2879         | 11 |
| 14 | 1496.6760 | 748.8416        |           |                  | 1478.6654      | 739.8363         | L    | 1166.5436 | 583.7755        | 1149.5171 | 575.2622         | 1148.5331      | 574.7702         | 10 |
| 15 | 1611.7029 | 806.3551        | 1594.6764 | 797.8418         | 1593.6924      | 797.3498         | N    | 1053.4596 | 527.2334        | 1036.4330 | 518.7202         | 1035.4490      | 518.2281         | 9  |
| 16 | 1740.7455 | 870.8764        | 1723.7190 | 862.3631         | 1722.7349      | 861.8711         | E    | 938.4326  | 469.7200        | 921.4061  | 461.2067         | 920.4221       | 460.7147         | 8  |
| 17 | 1841.7932 | 921.4002        | 1824.7666 | 912.8870         | 1823.7826      | 912.3950         | T    | 809.3900  | 405.1987        | 792.3635  | 396.6854         | 791.3795       | 396.1934         | 7  |
| 18 | 1898.8147 | 949.9110        | 1881.7881 | 941.3977         | 1880.8041      | 940.9057         | G    | 708.3424  | 354.6748        | 691.3158  | 346.1615         |                |                  | 6  |
| 19 | 2026.8732 | 1013.9403       | 2009.8467 | 1005.4270        | 2008.8627      | 1004.9350        | Q    | 651.3209  | 326.1641        | 634.2944  | 317.6508         |                |                  | 5  |
| 20 | 2083.8947 | 1042.4510       | 2066.8682 | 1033.9377        | 2065.8841      | 1033.4457        | G    | 523.2623  | 262.1348        | 506.2358  | 253.6215         |                |                  | 4  |
| 21 | 2246.9580 | 1123.9827       | 2229.9315 | 1115.4694        | 2228.9475      | 1114.9774        | Y    | 466.2409  | 233.6241        | 449.2143  | 225.1108         |                |                  | 3  |
| 22 | 2375.0166 | 1188.0119       | 2357.9901 | 1179.4987        | 2357.0060      | 1179.0067        | Q    | 303.1775  | 152.0924        | 286.1510  | 143.5791         |                |                  | 2  |

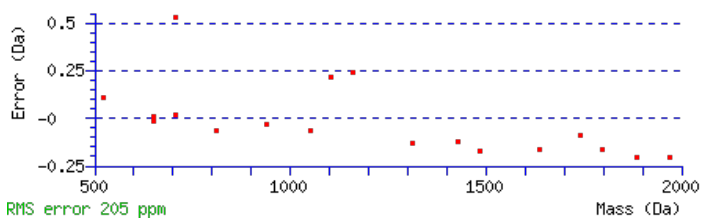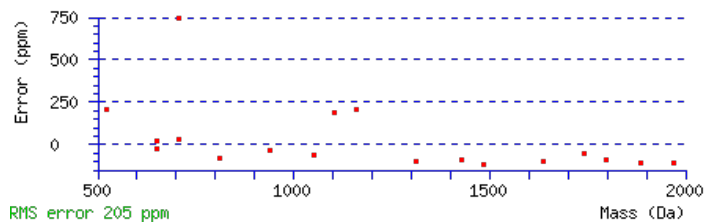

NCBI BLAST search of [TELFSSSCPGGIMLNETGQGYQR](#)

(Parameters: blastp, nr protein database, expect=20000, no filter, PAM30)

Other BLAST [web gateways](#)

All matches to this query

| Score | Mr(calc)  | Delta   | Sequence                                    | Site Analysis         |
|-------|-----------|---------|---------------------------------------------|-----------------------|
| 119.8 | 2548.1210 | 0.0105  | <a href="#">TELFSSSCPGGIMLNETGQGYQR</a>     | Deamidated N15 99.98% |
| 80.8  | 2548.1210 | 0.0105  | <a href="#">TELFSSSCPGGIMLNETGQGYQR</a>     | Deamidated Q19 0.01%  |
| 77.8  | 2548.1210 | 0.0105  | <a href="#">TELFSSSCPGGIMLNETGQGYQR</a>     | Deamidated Q22 0.01%  |
| 32.8  | 2547.1370 | 0.9946  | <a href="#">TELFSSSCPGGIMLNETGQGYQR</a>     |                       |
| 2.0   | 2548.1283 | 0.0032  | <a href="#">GMDTYIEIARMLCNIAESWNK</a>       |                       |
| 1.3   | 2548.1235 | 0.0081  | <a href="#">NTVCPEQSEALAGGSAGDGAQAAGVTK</a> |                       |
| 1.2   | 2548.1371 | -0.0056 | <a href="#">FFNIQGHAFGIMPEMMAMQKR</a>       |                       |
| 1.2   | 2548.1371 | -0.0056 | <a href="#">FFNIQGHAFGIMPEMMAMQKR</a>       |                       |

Mascot: <http://www.matrixscience.com/>



# MATRIX SCIENCE Mascot Search Results

## Peptide View

MS/MS Fragmentation of **TEGRPDMKTELFSSSCPGGIMLNETGQGYQR**

Found in **O95445** in **con\_Xuniprot\_HUMAN3**, APOM\_HUMAN Apolipoprotein M OS=Homo sapiens GN=APOM PE=1 SV=2

Match to Query 27786: 3478.554176 from(870.645820,4+) intensity(23090.9902) rtinseconds(1232) scans(3123) index(23868)

Title: 111019\_Est\_MI\_YS\_G\_05Spectrum2679\_scans\_\_3123

Data file C:\mascot\20140703\_Tmgf\_1D\CSV\_UseAnalysis\MasterCSV\All\_Glyco\mgf\ptm\UC18ERLIC\_PTM\_35D.mgf

Click mouse within plot area to zoom in by factor of two about that point

Or, to Da

Label all possible matches Label matches used for scoring

Show Y-axis

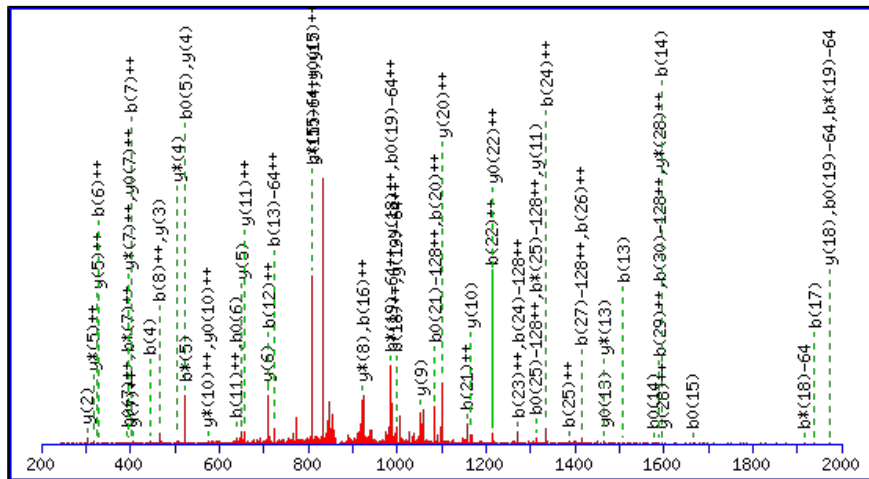

Monoisotopic mass of neutral peptide Mr(calc): 3478.5439

Fixed modifications: Carbamidomethyl (C) (apply to specified residues or termini only)

Variable modifications:

M7 : Oxidation (M), with neutral losses 0.0000 (shown in table), 63.9983

M21 : Oxidation (M), with neutral losses 0.0000 (shown in table), 63.9983

N23 : Deamidated (NQ)

Ions Score: 58 Expect: 0.00024

Matches : 69/606 fragment ions using 102 most intense peaks (help)

| #  | b                | b <sup>++</sup>  | b <sup>*</sup>  | b <sup>*++</sup> | b <sup>0</sup>   | b <sup>0++</sup> | Seq. | y                | y <sup>++</sup>  | y <sup>*</sup>   | y <sup>*++</sup> | y <sup>0</sup>   | y <sup>0++</sup> | #  |
|----|------------------|------------------|-----------------|------------------|------------------|------------------|------|------------------|------------------|------------------|------------------|------------------|------------------|----|
| 1  | 102.0550         | 51.5311          |                 |                  | 84.0444          | 42.5258          | T    |                  |                  |                  |                  |                  |                  | 31 |
| 2  | 231.0975         | 116.0524         |                 |                  | 213.0870         | 107.0471         | E    | 3378.5035        | 1689.7554        | 3361.4770        | 1681.2421        | 3360.4930        | 1680.7501        | 30 |
| 3  | 288.1190         | 144.5631         |                 |                  | 270.1084         | 135.5579         | G    | 3249.4609        | 1625.2341        | 3232.4344        | 1616.7208        | 3231.4504        | 1616.2288        | 29 |
| 4  | <b>444.2201</b>  | 222.6137         | 427.1936        | 214.1004         | 426.2096         | 213.6084         | R    | 3192.4395        | <b>1596.7234</b> | 3175.4129        | <b>1588.2101</b> | 3174.4289        | 1587.7181        | 28 |
| 5  | 541.2729         | 271.1401         | <b>524.2463</b> | 262.6268         | <b>523.2623</b>  | 262.1348         | P    | 3036.3384        | 1518.6728        | 3019.3118        | 1510.1595        | 3018.3278        | 1509.6675        | 27 |
| 6  | 656.2998         | <b>328.6536</b>  | 639.2733        | 320.1403         | <b>638.2893</b>  | 319.6483         | D    | 2939.2856        | 1470.1464        | 2922.2590        | 1461.6332        | 2921.2750        | 1461.1411        | 26 |
| 7  | 803.3352         | <b>402.1713</b>  | 786.3087        | <b>393.6580</b>  | 785.3247         | <b>393.1660</b>  | M    | 2824.2586        | 1412.6330        | 2807.2321        | 1404.1197        | 2806.2481        | 1403.6277        | 25 |
| 8  | 931.4302         | <b>466.2187</b>  | 914.4036        | 457.7055         | 913.4196         | 457.2135         | K    | 2677.2232        | 1339.1153        | 2660.1967        | 1330.6020        | 2659.2127        | 1330.1100        | 24 |
| 9  | 1032.4779        | 516.7426         | 1015.4513       | 508.2293         | 1014.4673        | 507.7373         | T    | 2549.1283        | 1275.0678        | 2532.1017        | 1266.5545        | 2531.1177        | 1266.0625        | 23 |
| 10 | 1161.5205        | 581.2639         | 1144.4939       | 572.7506         | 1143.5099        | 572.2586         | E    | 2448.0806        | 1224.5439        | 2431.0541        | 1216.0307        | 2430.0700        | <b>1215.5387</b> | 22 |
| 11 | 1274.6045        | <b>637.8059</b>  | 1257.5780       | 629.2926         | 1256.5940        | 628.8006         | L    | 2319.0380        | 1160.0226        | 2302.0115        | 1151.5094        | 2301.0274        | 1151.0174        | 21 |
| 12 | 1421.6729        | <b>711.3401</b>  | 1404.6464       | 702.8268         | 1403.6624        | 702.3348         | F    | 2205.9539        | <b>1103.4806</b> | 2188.9274        | 1094.9673        | 2187.9434        | 1094.4753        | 20 |
| 13 | <b>1508.7050</b> | 754.8561         | 1491.6784       | 746.3428         | 1490.6944        | 745.8508         | S    | 2058.8855        | 1029.9464        | 2041.8590        | 1021.4331        | 2040.8750        | 1020.9411        | 19 |
| 14 | <b>1595.7370</b> | 798.3721         | 1578.7105       | 789.8589         | <b>1577.7264</b> | 789.3669         | S    | <b>1971.8535</b> | <b>986.4304</b>  | 1954.8270        | 977.9171         | 1953.8429        | 977.4251         | 18 |
| 15 | 1682.7690        | 841.8882         | 1665.7425       | 833.3749         | <b>1664.7585</b> | 832.8829         | S    | 1884.8215        | 942.9144         | 1867.7949        | 934.4011         | 1866.8109        | 933.9091         | 17 |
| 16 | 1842.7997        | <b>921.9035</b>  | 1825.7731       | 913.3902         | 1824.7891        | 912.8982         | C    | 1797.7894        | 899.3984         | 1780.7629        | 890.8851         | 1779.7789        | 890.3931         | 16 |
| 17 | <b>1939.8524</b> | 970.4299         | 1922.8259       | 961.9166         | 1921.8419        | 961.4246         | P    | 1637.7588        | 819.3830         | 1620.7323        | <b>810.8698</b>  | 1619.7482        | <b>810.3778</b>  | 15 |
| 18 | 1996.8739        | <b>998.9406</b>  | 1979.8474       | 990.4273         | 1978.8633        | 989.9353         | G    | 1540.7060        | 770.8567         | 1523.6795        | 762.3434         | 1522.6955        | 761.8514         | 14 |
| 19 | 2053.8954        | 1027.4513        | 2036.8688       | 1018.9380        | 2035.8848        | 1018.4460        | G    | 1483.6846        | 742.3459         | <b>1466.6580</b> | 733.8326         | <b>1465.6740</b> | 733.3406         | 13 |
| 20 | 2166.9794        | <b>1083.9934</b> | 2149.9529       | 1075.4801        | 2148.9689        | 1074.9881        | I    | 1426.6631        | 713.8352         | 1409.6366        | 705.3219         | 1408.6525        | 704.8299         | 12 |
| 21 | 2314.0148        | <b>1157.5111</b> | 2296.9883       | 1148.9978        | 2296.0043        | 1148.5058        | M    | <b>1313.5790</b> | <b>657.2932</b>  | 1296.5525        | 648.7799         | 1295.5685        | 648.2879         | 11 |
| 22 | 2427.0989        | <b>1214.0531</b> | 2410.0723       | 1205.5398        | 2409.0883        | 1205.0478        | L    | <b>1166.5436</b> | 583.7755         | 1149.5171        | <b>575.2622</b>  | 1148.5331        | <b>574.7702</b>  | 10 |

|    |           |                  |           |           |           |           |          |                  |                 |                 |                 |           |                 |          |
|----|-----------|------------------|-----------|-----------|-----------|-----------|----------|------------------|-----------------|-----------------|-----------------|-----------|-----------------|----------|
| 23 | 2542.1258 | <b>1271.5666</b> | 2525.0993 | 1263.0533 | 2524.1153 | 1262.5613 | <b>N</b> | <b>1053.4596</b> | 527.2334        | 1036.4330       | 518.7202        | 1035.4490 | 518.2281        | <b>9</b> |
| 24 | 2671.1684 | <b>1336.0879</b> | 2654.1419 | 1327.5746 | 2653.1579 | 1327.0826 | <b>E</b> | 938.4326         | 469.7200        | <b>921.4061</b> | 461.2067        | 920.4221  | 460.7147        | <b>8</b> |
| 25 | 2772.2161 | <b>1386.6117</b> | 2755.1896 | 1378.0984 | 2754.2055 | 1377.6064 | <b>T</b> | <b>809.3900</b>  | <b>405.1987</b> | 792.3635        | <b>396.6854</b> | 791.3795  | <b>396.1934</b> | <b>7</b> |
| 26 | 2829.2376 | <b>1415.1224</b> | 2812.2110 | 1406.6092 | 2811.2270 | 1406.1171 | <b>G</b> | <b>708.3424</b>  | 354.6748        | 691.3158        | 346.1615        |           |                 | <b>6</b> |
| 27 | 2957.2962 | 1479.1517        | 2940.2696 | 1470.6384 | 2939.2856 | 1470.1464 | <b>Q</b> | <b>651.3209</b>  | <b>326.1641</b> | 634.2944        | <b>317.6508</b> |           |                 | <b>5</b> |
| 28 | 3014.3176 | 1507.6624        | 2997.2911 | 1499.1492 | 2996.3071 | 1498.6572 | <b>G</b> | <b>523.2623</b>  | 262.1348        | <b>506.2358</b> | 253.6215        |           |                 | <b>4</b> |
| 29 | 3177.3809 | <b>1589.1941</b> | 3160.3544 | 1580.6808 | 3159.3704 | 1580.1888 | <b>Y</b> | <b>466.2409</b>  | 233.6241        | 449.2143        | 225.1108        |           |                 | <b>3</b> |
| 30 | 3305.4395 | 1653.2234        | 3288.4130 | 1644.7101 | 3287.4290 | 1644.2181 | <b>Q</b> | <b>303.1775</b>  | 152.0924        | 286.1510        | 143.5791        |           |                 | <b>2</b> |
| 31 |           |                  |           |           |           |           | <b>R</b> | 175.1190         | 88.0631         | 158.0924        | 79.5498         |           |                 | <b>1</b> |

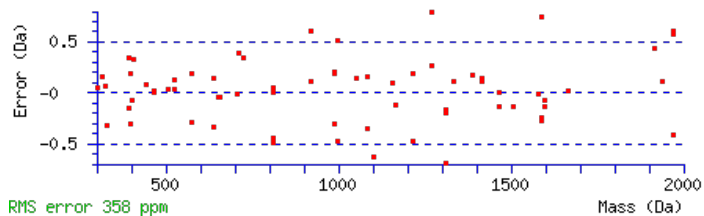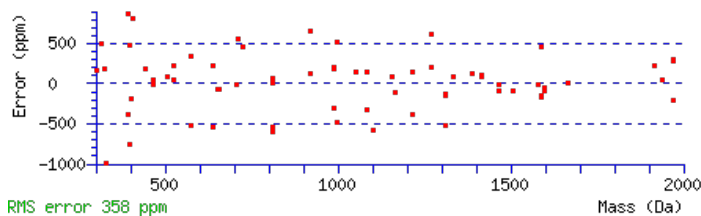

NCBI **BLAST** search of [TEGRPDMKTELFSSSCP GGIMLNETGQGYQR](#)

(Parameters: blastp, nr protein database, expect=20000, no filter, PAM30)

Other BLAST [web gateways](#)

**All matches to this query**

| Score | Mr(calc)  | Delta   | Sequence                                         | Site Analysis         |
|-------|-----------|---------|--------------------------------------------------|-----------------------|
| 57.6  | 3478.5439 | 0.0103  | <a href="#">TEGRPDMKTELFSSSCP GGIMLNETGQGYQR</a> | Deamidated N23 40.28% |
| 56.3  | 3478.5439 | 0.0103  | <a href="#">TEGRPDMKTELFSSSCP GGIMLNETGQGYQR</a> | Deamidated Q27 30.00% |
| 56.3  | 3478.5439 | 0.0103  | <a href="#">TEGRPDMKTELFSSSCP GGIMLNETGQGYQR</a> | Deamidated Q30 29.72% |
| 54.4  | 3477.5599 | 0.9943  | <a href="#">TEGRPDMKTELFSSSCP GGIMLNETGQGYQR</a> |                       |
| 7.3   | 3476.5421 | 2.0120  | <a href="#">GMQESEEK NYSAPSIKCASTLDVFTNCPPAK</a> |                       |
| 4.0   | 3476.5421 | 2.0120  | <a href="#">GMQESEEK NYSAPSIKCASTLDVFTNCPPAK</a> |                       |
| 3.6   | 3476.5421 | 2.0120  | <a href="#">GMQESEEK NYSAPSIKCASTLDVFTNCPPAK</a> |                       |
| 2.7   | 3478.5657 | -0.0115 | <a href="#">DYQILCGNQAPGFLTDIHTGKPLDVDECGSR</a>  |                       |
| 2.7   | 3478.5657 | -0.0115 | <a href="#">NYQILCGNQAPGFLTDIHTGKPLDVDECGSR</a>  |                       |
| 2.6   | 3477.5673 | 0.9869  | <a href="#">YHSCDVMQKTQKACEIGQLHEPQTLGMLR</a>    |                       |

Mascot: <http://www.matrixscience.com/>

# MASCOT SCIENCE Mascot Search Results

## Peptide View

MS/MS Fragmentation of **SLEAINSGQLQMG LQR**

Found in **P09172** in **con\_Xuniprot\_HUMAN3**, DOPO\_HUMAN Dopamine beta-hydroxylase OS=Homo sapiens GN=DBH PE=1 SV=3

Match to Query 8437: 1673.845548 from(837.930050,2+) intensity(7584.5684) rtinseconds(1676) scans(3689) index(28455)

Title: 111019\_Est\_MI\_YS\_G\_13Spectrum3206\_scans\_\_3689

Data file C:\\mascot\\20140703\_Tmgf\_1D\\CSV\_UseAnalysis\\MasterCSV\\All\_Glyco\\mgf\\ptm\\UC18ERLIC\_PTM\_35D.mgf

Click mouse within plot area to zoom in by factor of two about that point

Or, to Da

Label all possible matches Label matches used for scoring

Show Y-axis

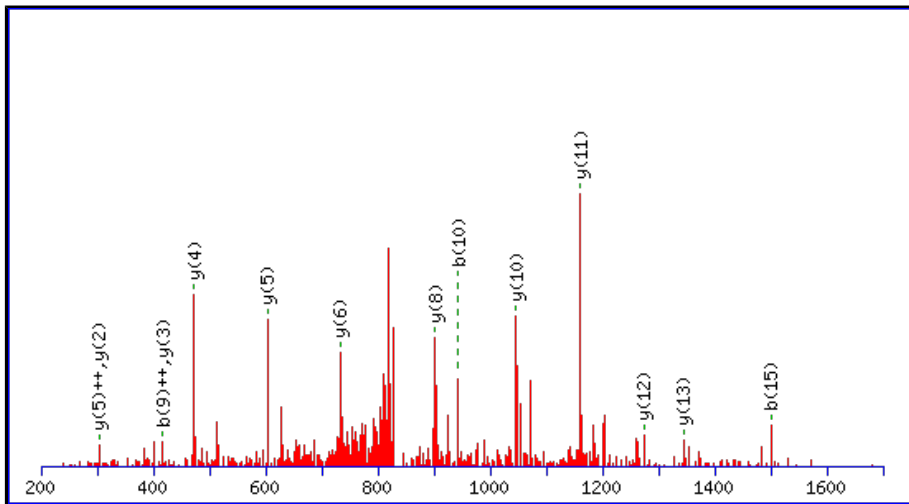

Monoisotopic mass of neutral peptide **Mr(calc): 1673.8406**

Fixed modifications: Carbamidomethyl (C) (apply to specified residues or termini only)

Variable modifications:

N6 : Deamidated (NQ)

Ions Score: 98 Expect: 4.1e-008

Matches : 14/154 fragment ions using 14 most intense peaks ([help](#))

| #  | b                | b <sup>++</sup> | b <sup>*</sup> | b <sup>*++</sup> | b <sup>0</sup> | b <sup>0++</sup> | Seq. | y                | y <sup>++</sup> | y <sup>*</sup> | y <sup>*++</sup> | y <sup>0</sup> | y <sup>0++</sup> | #  |
|----|------------------|-----------------|----------------|------------------|----------------|------------------|------|------------------|-----------------|----------------|------------------|----------------|------------------|----|
| 1  | 88.0393          | 44.5233         |                |                  | 70.0287        | 35.5180          | S    |                  |                 |                |                  |                |                  | 16 |
| 2  | 201.1234         | 101.0653        |                |                  | 183.1128       | 92.0600          | L    | 1587.8159        | 794.4116        | 1570.7894      | 785.8983         | 1569.8054      | 785.4063         | 15 |
| 3  | 330.1660         | 165.5866        |                |                  | 312.1554       | 156.5813         | E    | 1474.7319        | 737.8696        | 1457.7053      | 729.3563         | 1456.7213      | 728.8643         | 14 |
| 4  | 401.2031         | 201.1052        |                |                  | 383.1925       | 192.0999         | A    | <b>1345.6893</b> | 673.3483        | 1328.6627      | 664.8350         | 1327.6787      | 664.3430         | 13 |
| 5  | 514.2871         | 257.6472        |                |                  | 496.2766       | 248.6419         | I    | <b>1274.6521</b> | 637.8297        | 1257.6256      | 629.3164         | 1256.6416      | 628.8244         | 12 |
| 6  | 629.3141         | 315.1607        | 612.2875       | 306.6474         | 611.3035       | 306.1554         | N    | <b>1161.5681</b> | 581.2877        | 1144.5415      | 572.7744         | 1143.5575      | 572.2824         | 11 |
| 7  | 686.3355         | 343.6714        | 669.3090       | 335.1581         | 668.3250       | 334.6661         | G    | <b>1046.5411</b> | 523.7742        | 1029.5146      | 515.2609         | 1028.5306      | 514.7689         | 10 |
| 8  | 773.3676         | 387.1874        | 756.3410       | 378.6742         | 755.3570       | 378.1821         | S    | 989.5197         | 495.2635        | 972.4931       | 486.7502         | 971.5091       | 486.2582         | 9  |
| 9  | 830.3890         | <b>415.6982</b> | 813.3625       | 407.1849         | 812.3785       | 406.6929         | G    | <b>902.4876</b>  | 451.7475        | 885.4611       | 443.2342         |                |                  | 8  |
| 10 | <b>943.4731</b>  | 472.2402        | 926.4466       | 463.7269         | 925.4625       | 463.2349         | L    | 845.4662         | 423.2367        | 828.4396       | 414.7235         |                |                  | 7  |
| 11 | 1071.5317        | 536.2695        | 1054.5051      | 527.7562         | 1053.5211      | 527.2642         | Q    | <b>732.3821</b>  | 366.6947        | 715.3556       | 358.1814         |                |                  | 6  |
| 12 | 1202.5722        | 601.7897        | 1185.5456      | 593.2764         | 1184.5616      | 592.7844         | M    | <b>604.3235</b>  | <b>302.6654</b> | 587.2970       | 294.1521         |                |                  | 5  |
| 13 | 1259.5936        | 630.3005        | 1242.5671      | 621.7872         | 1241.5831      | 621.2952         | G    | <b>473.2831</b>  | 237.1452        | 456.2565       | 228.6319         |                |                  | 4  |
| 14 | 1372.6777        | 686.8425        | 1355.6511      | 678.3292         | 1354.6671      | 677.8372         | L    | <b>416.2616</b>  | 208.6344        | 399.2350       | 200.1212         |                |                  | 3  |
| 15 | <b>1500.7363</b> | 750.8718        | 1483.7097      | 742.3585         | 1482.7257      | 741.8665         | Q    | <b>303.1775</b>  | 152.0924        | 286.1510       | 143.5791         |                |                  | 2  |
| 16 |                  |                 |                |                  |                |                  | R    | 175.1190         | 88.0631         | 158.0924       | 79.5498          |                |                  | 1  |

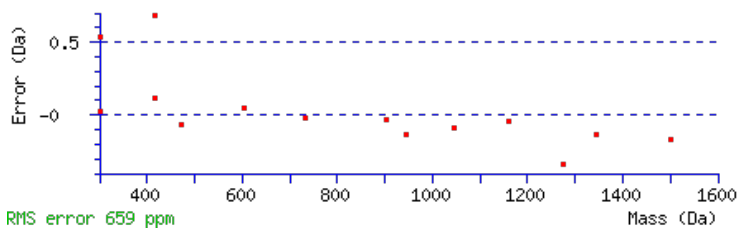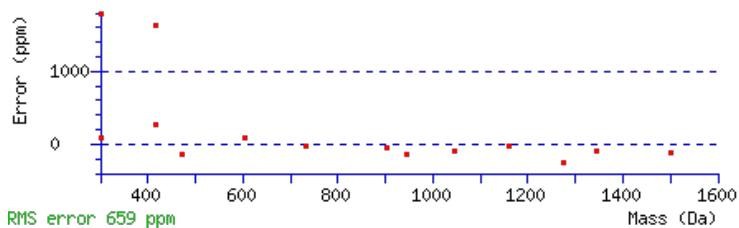

NCBI **BLAST** search of [SLEAINSGLQMGLQR](#)

(Parameters: blastp, nr protein database, expect=20000, no filter, PAM30)

Other BLAST [web gateways](#)

**All matches to this query**

| Score | Mr(calc)  | Delta   | Sequence                         | Site Analysis        |
|-------|-----------|---------|----------------------------------|----------------------|
| 98.1  | 1673.8406 | 0.0049  | <a href="#">SLEAINSGLQMGLQR</a>  | Deamidated N6 99.99% |
| 59.6  | 1673.8406 | 0.0049  | <a href="#">SLEAINSGLQMGLQR</a>  | Deamidated Q11 0.01% |
| 39.6  | 1673.8406 | 0.0049  | <a href="#">SLEAINSGLQMGLQR</a>  | Deamidated Q15 0.00% |
| 7.4   | 1673.8413 | 0.0042  | <a href="#">DENIKLSDFGESKR</a>   |                      |
| 6.9   | 1673.8481 | -0.0025 | <a href="#">LQLIAMDLPMVSGDR</a>  |                      |
| 6.1   | 1673.8472 | -0.0016 | <a href="#">DVDAEREKITQEIK</a>   |                      |
| 5.7   | 1673.8373 | 0.0083  | <a href="#">SASNTAAEFGEPLPKR</a> |                      |
| 5.5   | 1671.8362 | 2.0093  | <a href="#">KATLGPTGEGEPRGMR</a> |                      |
| 5.3   | 1673.8519 | -0.0063 | <a href="#">EVTGSIQLCRDAGIR</a>  |                      |
| 5.1   | 1673.8447 | 0.0009  | <a href="#">MVFIPSGPVEAQVQR</a>  |                      |

Mascot: <http://www.matrixscience.com/>

# MASCOT SCIENCE Mascot Search Results

## Peptide View

MS/MS Fragmentation of **SLEAINSGQLQMG LQR**

Found in **P09172** in **con\_Xuniprot\_HUMAN3**, DOPO\_HUMAN Dopamine beta-hydroxylase OS=Homo sapiens GN=DBH PE=1 SV=3

Match to Query 8703: 1689.842068 from(845.928310,2+) intensity(7863.5850) rtinseconds(1252) scans(2582) index(7593)

Title: 111019\_Est\_ISCardio\_NMI\_YP\_G\_12Spectrum2212\_scans\_\_2582

Data file C:\\mascot\\20140703\_Tmgf\_1D\\CSV\_UseAnalysis\\MasterCSV\\All\_Glyco\\mgf\\ptm\\UC18ERLIC\_PTM\_35D.mgf

Click mouse within plot area to zoom in by factor of two about that point

Or, to Da

Label all possible matches Label matches used for scoring

Show Y-axis

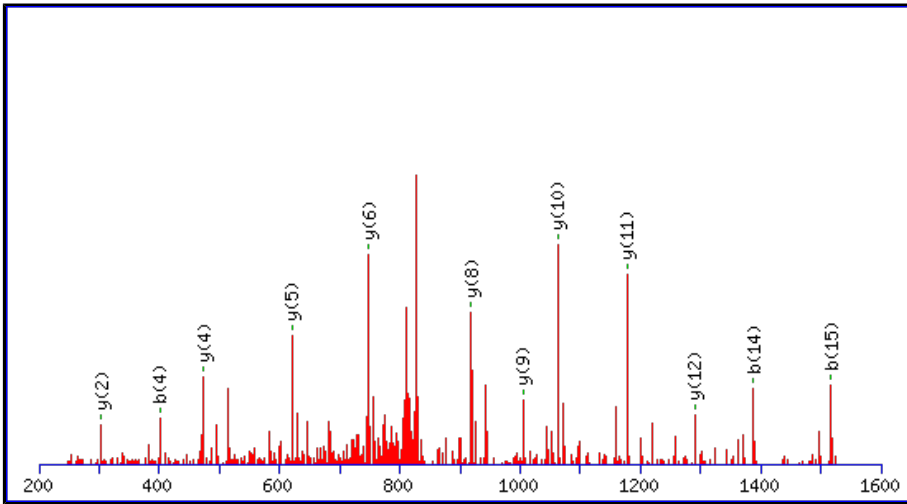

**Monoisotopic mass of neutral peptide Mr(calc):** 1689.8356

**Fixed modifications:** Carbamidomethyl (C) (apply to specified residues or termini only)

**Variable modifications:**

**N6** : Deamidated (NQ)

**M12** : Oxidation (M), with neutral losses 0.0000(shown in table), 63.9983

**Ions Score:** 91 **Expect:** 1.9e-007

**Matches :** 12/236 fragment ions using 13 most intense peaks ([help](#))

| #  | b                | b <sup>++</sup> | b <sup>*</sup> | b <sup>*++</sup> | b <sup>0</sup> | b <sup>0++</sup> | Seq. | y                | y <sup>++</sup> | y <sup>*</sup> | y <sup>*++</sup> | y <sup>0</sup> | y <sup>0++</sup> | #  |
|----|------------------|-----------------|----------------|------------------|----------------|------------------|------|------------------|-----------------|----------------|------------------|----------------|------------------|----|
| 1  | 88.0393          | 44.5233         |                |                  | 70.0287        | 35.5180          | S    |                  |                 |                |                  |                |                  | 16 |
| 2  | 201.1234         | 101.0653        |                |                  | 183.1128       | 92.0600          | L    | 1603.8108        | 802.4091        | 1586.7843      | 793.8958         | 1585.8003      | 793.4038         | 15 |
| 3  | 330.1660         | 165.5866        |                |                  | 312.1554       | 156.5813         | E    | 1490.7268        | 745.8670        | 1473.7002      | 737.3537         | 1472.7162      | 736.8617         | 14 |
| 4  | <b>401.2031</b>  | 201.1052        |                |                  | 383.1925       | 192.0999         | A    | 1361.6842        | 681.3457        | 1344.6576      | 672.8325         | 1343.6736      | 672.3404         | 13 |
| 5  | 514.2871         | 257.6472        |                |                  | 496.2766       | 248.6419         | I    | <b>1290.6471</b> | 645.8272        | 1273.6205      | 637.3139         | 1272.6365      | 636.8219         | 12 |
| 6  | 629.3141         | 315.1607        | 612.2875       | 306.6474         | 611.3035       | 306.1554         | N    | <b>1177.5630</b> | 589.2851        | 1160.5364      | 580.7719         | 1159.5524      | 580.2799         | 11 |
| 7  | 686.3355         | 343.6714        | 669.3090       | 335.1581         | 668.3250       | 334.6661         | G    | <b>1062.5361</b> | 531.7717        | 1045.5095      | 523.2584         | 1044.5255      | 522.7664         | 10 |
| 8  | 773.3676         | 387.1874        | 756.3410       | 378.6742         | 755.3570       | 378.1821         | S    | <b>1005.5146</b> | 503.2609        | 988.4880       | 494.7477         | 987.5040       | 494.2557         | 9  |
| 9  | 830.3890         | 415.6982        | 813.3625       | 407.1849         | 812.3785       | 406.6929         | G    | <b>918.4826</b>  | 459.7449        | 901.4560       | 451.2316         |                |                  | 8  |
| 10 | 943.4731         | 472.2402        | 926.4466       | 463.7269         | 925.4625       | 463.2349         | L    | 861.4611         | 431.2342        | 844.4346       | 422.7209         |                |                  | 7  |
| 11 | 1071.5317        | 536.2695        | 1054.5051      | 527.7562         | 1053.5211      | 527.2642         | Q    | <b>748.3770</b>  | 374.6922        | 731.3505       | 366.1789         |                |                  | 6  |
| 12 | 1218.5671        | 609.7872        | 1201.5405      | 601.2739         | 1200.5565      | 600.7819         | M    | <b>620.3185</b>  | 310.6629        | 603.2919       | 302.1496         |                |                  | 5  |
| 13 | 1275.5885        | 638.2979        | 1258.5620      | 629.7846         | 1257.5780      | 629.2926         | G    | <b>473.2831</b>  | 237.1452        | 456.2565       | 228.6319         |                |                  | 4  |
| 14 | <b>1388.6726</b> | 694.8399        | 1371.6461      | 686.3267         | 1370.6620      | 685.8347         | L    | 416.2616         | 208.6344        | 399.2350       | 200.1212         |                |                  | 3  |
| 15 | <b>1516.7312</b> | 758.8692        | 1499.7046      | 750.3560         | 1498.7206      | 749.8639         | Q    | <b>303.1775</b>  | 152.0924        | 286.1510       | 143.5791         |                |                  | 2  |
| 16 |                  |                 |                |                  |                |                  | R    | 175.1190         | 88.0631         | 158.0924       | 79.5498          |                |                  | 1  |

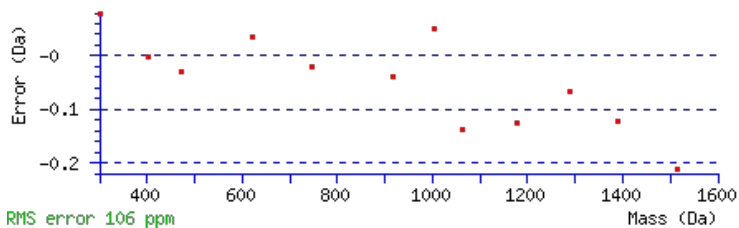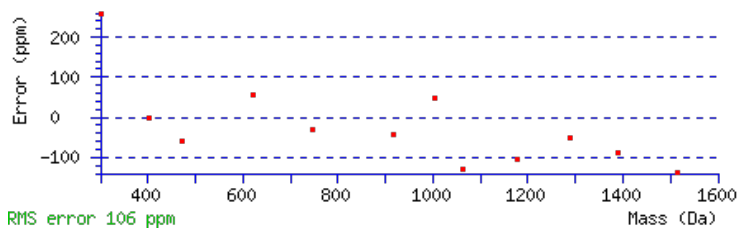

NCBI **BLAST** search of [SLEAINSGLOMGLQR](#)

(Parameters: blastp, nr protein database, expect=20000, no filter, PAM30)

Other BLAST [web gateways](#)

**All matches to this query**

| Score | Mr(calc)  | Delta   | Sequence                           | Site Analysis        |
|-------|-----------|---------|------------------------------------|----------------------|
| 91.3  | 1689.8356 | 0.0065  | <a href="#">SLEAINSGLOMGLQR</a>    | Deamidated N6 99.99% |
| 50.6  | 1689.8356 | 0.0065  | <a href="#">SLEAINSGLOMGLQR</a>    | Deamidated Q11 0.01% |
| 37.3  | 1689.8356 | 0.0065  | <a href="#">SLEAINSGLOMGLQR</a>    | Deamidated Q15 0.00% |
| 10.3  | 1689.8396 | 0.0025  | <a href="#">AQALMEQYVAALPER</a>    |                      |
| 10.3  | 1689.8396 | 0.0025  | <a href="#">AQALMEQYVAALPER</a>    |                      |
| 9.2   | 1688.8318 | 1.0103  | <a href="#">CGWGPFGRSERKPR</a>     |                      |
| 9.1   | 1689.8355 | 0.0065  | <a href="#">RQLETDELSLAMQR</a>     |                      |
| 6.5   | 1689.8434 | -0.0013 | <a href="#">TLQGPSVHNLHNSKR</a>    |                      |
| 5.1   | 1689.8355 | 0.0065  | <a href="#">NORIQELIDEMRK</a>      |                      |
| 4.6   | 1687.8318 | 2.0102  | <a href="#">GDKGNPGWPGAPGVPGPK</a> |                      |

Mascot: <http://www.matrixscience.com/>

# MASCOT SCIENCE Mascot Search Results

## Peptide View

MS/MS Fragmentation of **GAFISNFSMTVDGK**

Found in **P19823** in **con\_Xuniprot\_HUMAN3**, ITIH2\_HUMAN Inter-alpha-trypsin inhibitor heavy chain H2 OS=Homo sapiens GN=ITIH2 PE=1 SV=2

Match to Query 6477: 1473.685488 from(737.850020,2+) intensity(209025.8438) rtinseconds(1778) scans(4524) index(1355)

Title: 111019\_Est\_ISCardio\_NMI\_YP\_G\_3Spectrum3942\_scans\_\_4524

Data file C:\\mascot\\20140703\_Tmgf\_1D\\CSV\_UseAnalysis\\MasterCSV\\All\_Glyco\\mgf\\ptm\\UC18ERLIC\_PTM\_35D.mgf

Click mouse within plot area to zoom in by factor of two about that point

Or, to Da

Label all possible matches Label matches used for scoring

Show Y-axis

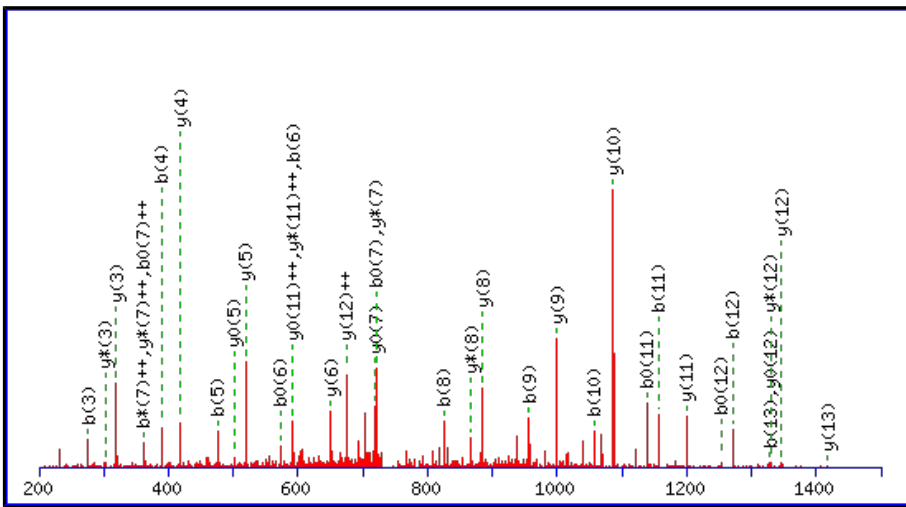

Monoisotopic mass of neutral peptide  $M_r(\text{calc})$ : 1473.6810

Fixed modifications: Carbamidomethyl (C) (apply to specified residues or termini only)

Variable modifications:

N6 : Deamidated (NQ)

Ions Score: 100 Expect: 1.3e-008

Matches : 37/134 fragment ions using 37 most intense peaks ([help](#))

| #  | b         | b <sup>++</sup> | b <sup>*</sup> | b <sup>***</sup> | b <sup>0</sup> | b <sup>0++</sup> | Seq. | y         | y <sup>++</sup> | y <sup>*</sup> | y <sup>***</sup> | y <sup>0</sup> | y <sup>0++</sup> | #  |
|----|-----------|-----------------|----------------|------------------|----------------|------------------|------|-----------|-----------------|----------------|------------------|----------------|------------------|----|
| 1  | 58.0287   | 29.5180         |                |                  |                |                  | G    |           |                 |                |                  |                |                  | 14 |
| 2  | 129.0659  | 65.0366         |                |                  |                |                  | A    | 1417.6668 | 709.3370        | 1400.6402      | 700.8238         | 1399.6562      | 700.3318         | 13 |
| 3  | 276.1343  | 138.5708        |                |                  |                |                  | F    | 1346.6297 | 673.8185        | 1329.6031      | 665.3052         | 1328.6191      | 664.8132         | 12 |
| 4  | 389.2183  | 195.1128        |                |                  |                |                  | I    | 1199.5613 | 600.2843        | 1182.5347      | 591.7710         | 1181.5507      | 591.2790         | 11 |
| 5  | 476.2504  | 238.6288        |                |                  | 458.2398       | 229.6235         | S    | 1086.4772 | 543.7422        | 1069.4507      | 535.2290         | 1068.4666      | 534.7370         | 10 |
| 6  | 591.2773  | 296.1423        | 574.2508       | 287.6290         | 573.2667       | 287.1370         | N    | 999.4452  | 500.2262        | 982.4186       | 491.7130         | 981.4346       | 491.2209         | 9  |
| 7  | 738.3457  | 369.6765        | 721.3192       | 361.1632         | 720.3352       | 360.6712         | F    | 884.4182  | 442.7128        | 867.3917       | 434.1995         | 866.4077       | 433.7075         | 8  |
| 8  | 825.3777  | 413.1925        | 808.3512       | 404.6792         | 807.3672       | 404.1872         | S    | 737.3498  | 369.1785        | 720.3233       | 360.6653         | 719.3393       | 360.1733         | 7  |
| 9  | 956.4182  | 478.7128        | 939.3917       | 470.1995         | 938.4077       | 469.7075         | M    | 650.3178  | 325.6625        | 633.2912       | 317.1493         | 632.3072       | 316.6573         | 6  |
| 10 | 1057.4659 | 529.2366        | 1040.4394      | 520.7233         | 1039.4553      | 520.2313         | T    | 519.2773  | 260.1423        | 502.2508       | 251.6290         | 501.2667       | 251.1370         | 5  |
| 11 | 1156.5343 | 578.7708        | 1139.5078      | 570.2575         | 1138.5238      | 569.7655         | V    | 418.2296  | 209.6185        | 401.2031       | 201.1052         | 400.2191       | 200.6132         | 4  |
| 12 | 1271.5613 | 636.2843        | 1254.5347      | 627.7710         | 1253.5507      | 627.2790         | D    | 319.1612  | 160.0842        | 302.1347       | 151.5710         | 301.1506       | 151.0790         | 3  |
| 13 | 1328.5827 | 664.7950        | 1311.5562      | 656.2817         | 1310.5722      | 655.7897         | G    | 204.1343  | 102.5708        | 187.1077       | 94.0575          |                |                  | 2  |
| 14 |           |                 |                |                  |                |                  | K    | 147.1128  | 74.0600         | 130.0863       | 65.5468          |                |                  | 1  |



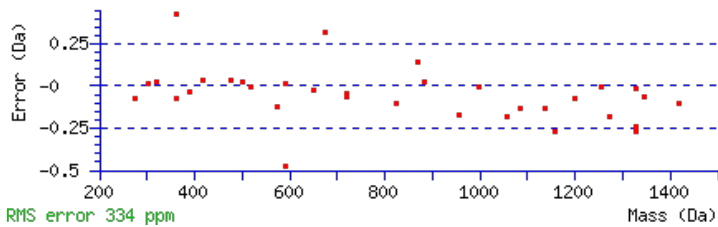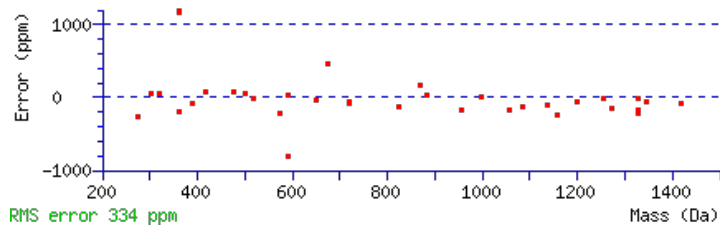

NCBI BLAST search of [GAFISNFSMTVDGK](#)

(Parameters: blastp, nr protein database, expect=20000, no filter, PAM30)

Other BLAST [web gateways](#)

**All matches to this query**

| Score | Mr(calc)  | Delta   | Sequence                       |
|-------|-----------|---------|--------------------------------|
| 100.1 | 1473.6810 | 0.0045  | <a href="#">GAFISNFSMTVDGK</a> |
| 11.8  | 1473.6823 | 0.0032  | <a href="#">HYGPGWVSMANAGK</a> |
| 5.2   | 1472.6752 | 1.0103  | <a href="#">CDICATHLNQLK</a>   |
| 4.8   | 1473.6922 | -0.0067 | <a href="#">GNGNFTLHPMLEK</a>  |
| 4.8   | 1473.6922 | -0.0067 | <a href="#">GNGNFTLHPMLEK</a>  |
| 4.8   | 1473.6843 | 0.0012  | <a href="#">CNNEAILSPMPVK</a>  |
| 4.4   | 1471.6790 | 2.0065  | <a href="#">NSADYSSESKKQK</a>  |
| 4.2   | 1473.6922 | -0.0067 | <a href="#">ELMPHLTFENGNGK</a> |
| 4.0   | 1473.6834 | 0.0021  | <a href="#">NKEGPOVSENLOK</a>  |
| 3.9   | 1473.6922 | -0.0067 | <a href="#">ELMPHLTFENGNGK</a> |

Mascot: <http://www.matrixscience.com/>

# MATRIX SCIENCE Mascot Search Results

## Peptide View

MS/MS Fragmentation of **GAFISNFSMTVDGK**

Found in **P19823** in **con\_Xuniprot\_HUMAN3**, ITIH2\_HUMAN Inter-alpha-trypsin inhibitor heavy chain H2 OS=Homo sapiens GN=ITIH2 PE=1 SV=2

Match to Query 6724: 1489.678748 from(745.846650,2+) intensity(25581.0605) rtinseconds(1598) scans(2798) index(13830)

Title: 111019\_Est\_MI\_200000g\_G\_08Spectrum2282\_scans\_\_2798

Data file C:\\mascot\\20140703\_Tmgf\_1D\\CSV\_UseAnalysis\\MasterCSV\\All\_Glyco\\mgf\\ptm\\UC18ERLIC\_PTM\_35D.mgf

Click mouse within plot area to zoom in by factor of two about that point

Or, to Da

Label all possible matches Label matches used for scoring

Show Y-axis

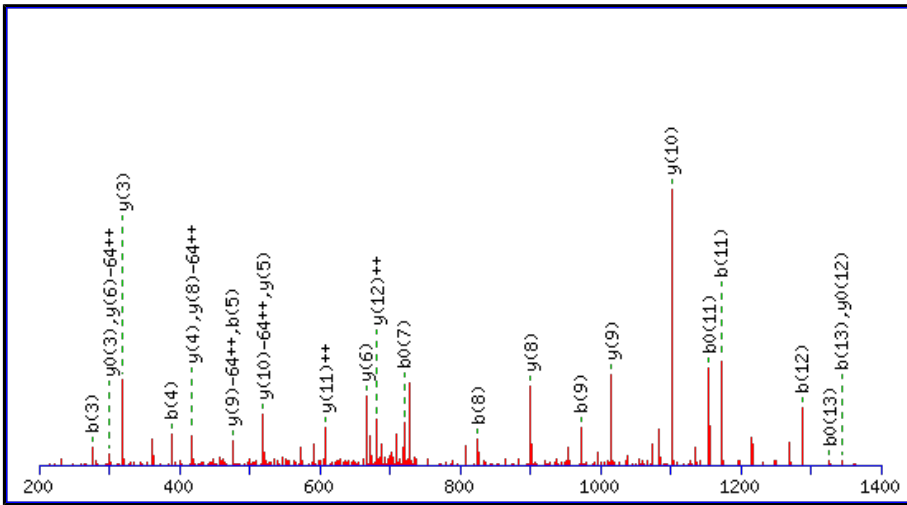

**Monoisotopic mass of neutral peptide Mr(calc):** 1489.6759

**Fixed modifications:** Carbamidomethyl (C) (apply to specified residues or termini only)

**Variable modifications:**

N6 : Deamidated (NQ)

M9 : Oxidation (M), with neutral losses 0.0000(shown in table), 63.9983

**Ions Score:** 83 **Expect:** 5.6e-007

**Matches :** 26/212 fragment ions using 24 most intense peaks ([help](#))

| #  | b                | b <sup>++</sup> | b <sup>*</sup> | b <sup>*++</sup> | b <sup>0</sup>   | b <sup>0++</sup> | Seq. | y                | y <sup>++</sup> | y <sup>*</sup> | y <sup>*++</sup> | y <sup>0</sup>   | y <sup>0++</sup> | #  |
|----|------------------|-----------------|----------------|------------------|------------------|------------------|------|------------------|-----------------|----------------|------------------|------------------|------------------|----|
| 1  | 58.0287          | 29.5180         |                |                  |                  |                  | G    |                  |                 |                |                  |                  |                  | 14 |
| 2  | 129.0659         | 65.0366         |                |                  |                  |                  | A    | 1433.6617        | 717.3345        | 1416.6352      | 708.8212         | 1415.6511        | 708.3292         | 13 |
| 3  | <b>276.1343</b>  | 138.5708        |                |                  |                  |                  | F    | 1362.6246        | <b>681.8159</b> | 1345.5980      | 673.3027         | <b>1344.6140</b> | 672.8107         | 12 |
| 4  | <b>389.2183</b>  | 195.1128        |                |                  |                  |                  | I    | 1215.5562        | <b>608.2817</b> | 1198.5296      | 599.7685         | 1197.5456        | 599.2764         | 11 |
| 5  | <b>476.2504</b>  | 238.6288        |                |                  | 458.2398         | 229.6235         | S    | <b>1102.4721</b> | 551.7397        | 1085.4456      | 543.2264         | 1084.4616        | 542.7344         | 10 |
| 6  | 591.2773         | 296.1423        | 574.2508       | 287.6290         | 573.2667         | 287.1370         | N    | <b>1015.4401</b> | 508.2237        | 998.4135       | 499.7104         | 997.4295         | 499.2184         | 9  |
| 7  | 738.3457         | 369.6765        | 721.3192       | 361.1632         | <b>720.3352</b>  | 360.6712         | F    | <b>900.4131</b>  | 450.7102        | 883.3866       | 442.1969         | 882.4026         | 441.7049         | 8  |
| 8  | <b>825.3777</b>  | 413.1925        | 808.3512       | 404.6792         | 807.3672         | 404.1872         | S    | 753.3447         | 377.1760        | 736.3182       | 368.6627         | 735.3342         | 368.1707         | 7  |
| 9  | <b>972.4131</b>  | 486.7102        | 955.3866       | 478.1969         | 954.4026         | 477.7049         | M    | <b>666.3127</b>  | 333.6600        | 649.2862       | 325.1467         | 648.3021         | 324.6547         | 6  |
| 10 | 1073.4608        | 537.2340        | 1056.4343      | 528.7208         | 1055.4503        | 528.2288         | T    | <b>519.2773</b>  | 260.1423        | 502.2508       | 251.6290         | 501.2667         | 251.1370         | 5  |
| 11 | <b>1172.5292</b> | 586.7683        | 1155.5027      | 578.2550         | <b>1154.5187</b> | 577.7630         | V    | <b>418.2296</b>  | 209.6185        | 401.2031       | 201.1052         | 400.2191         | 200.6132         | 4  |
| 12 | <b>1287.5562</b> | 644.2817        | 1270.5296      | 635.7685         | 1269.5456        | 635.2764         | D    | <b>319.1612</b>  | 160.0842        | 302.1347       | 151.5710         | <b>301.1506</b>  | 151.0790         | 3  |
| 13 | <b>1344.5776</b> | 672.7925        | 1327.5511      | 664.2792         | <b>1326.5671</b> | 663.7872         | G    | 204.1343         | 102.5708        | 187.1077       | 94.0575          |                  |                  | 2  |
| 14 |                  |                 |                |                  |                  |                  | K    | 147.1128         | 74.0600         | 130.0863       | 65.5468          |                  |                  | 1  |

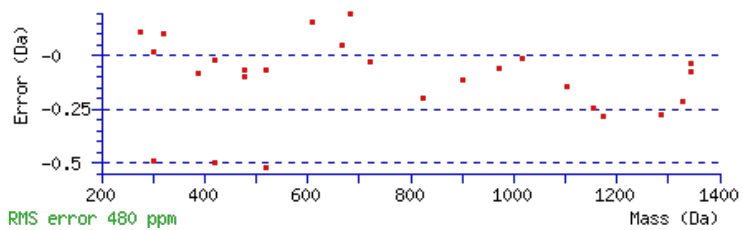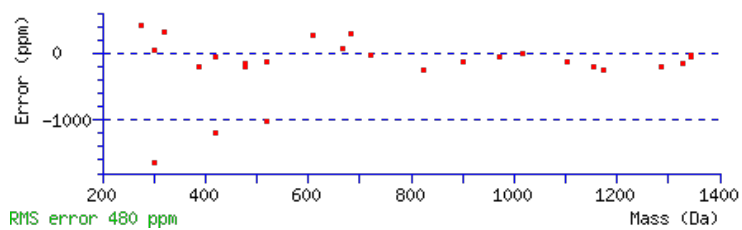

NCBI **BLAST** search of [GAFISNFSMTVDGK](#)

(Parameters: blastp, nr protein database, expect=20000, no filter, PAM30)

Other BLAST [web gateways](#)

**All matches to this query**

| Score | Mr(calc)  | Delta   | Sequence                       |
|-------|-----------|---------|--------------------------------|
| 83.0  | 1489.6759 | 0.0028  | <a href="#">GAFISNFSMTVDGK</a> |
| 12.1  | 1489.6718 | 0.0069  | <a href="#">QEAEQAIQCLNGK</a>  |
| 11.1  | 1489.6718 | 0.0069  | <a href="#">QEAEQAIQCLNGK</a>  |
| 8.4   | 1489.6718 | 0.0069  | <a href="#">QEAEQAIQCLNGK</a>  |
| 8.4   | 1489.6759 | 0.0028  | <a href="#">QMTTFDEFLLTR</a>   |
| 6.8   | 1489.6772 | 0.0015  | <a href="#">HYGPGWVSMANAGK</a> |
| 6.7   | 1488.6732 | 1.0055  | <a href="#">YGQIQGNPEEPEK</a>  |
| 6.7   | 1489.6718 | 0.0069  | <a href="#">QEAEQAIQCLNGK</a>  |
| 5.6   | 1489.6718 | 0.0069  | <a href="#">QEAEQAIQCLNGK</a>  |
| 3.0   | 1489.6792 | -0.0005 | <a href="#">CNNEAILSPMPVK</a>  |

Mascot: <http://www.matrixscience.com/>

# MATRIX SCIENCE Mascot Search Results

## Peptide View

MS/MS Fragmentation of **GAFISNFMSMTVDGKTFR**

Found in **P19823** in **con\_Xuniprot\_HUMAN3**, ITIH2\_HUMAN Inter-alpha-trypsin inhibitor heavy chain H2 OS=Homo sapiens GN=ITIH2 PE=1 SV=2

Match to Query 11275: 1893.895542 from(632.305790,3+) intensity(31405.6621) rtinseconds(1679) scans(3940) index(8898)

Title: 111019\_Est\_ISCardio\_NMI\_YS\_G\_4Spectrum3367\_scans\_\_3940

Data file C:\\mascot\\20140703\_Tmgf\_1D\\CSV\_UseAnalysis\\MasterCSV\\All\_Glyco\\mgf\\ptm\\UC18ERLIC\_PTM\_35D.mgf

Click mouse within plot area to zoom in by factor of two about that point

Or, to Da

Label all possible matches Label matches used for scoring

Show Y-axis

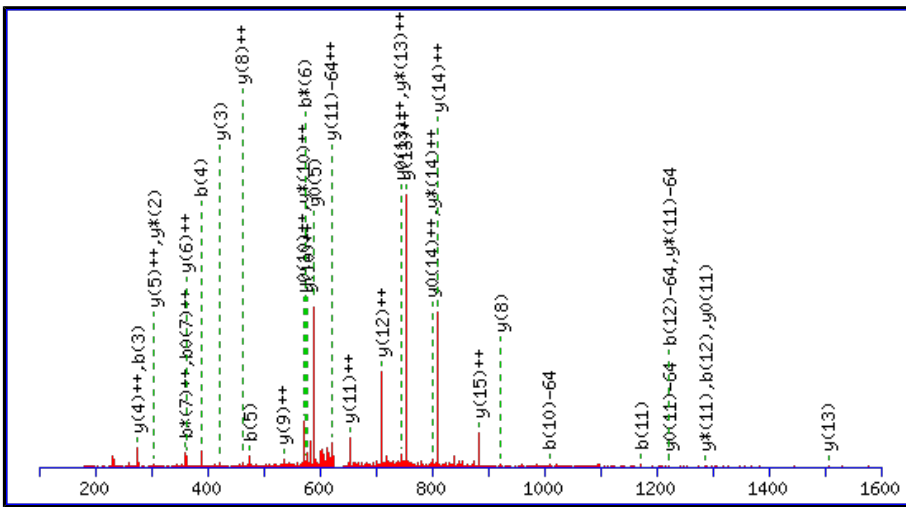

Monoisotopic mass of neutral peptide Mr(calc): 1893.8931

Fixed modifications: Carbamidomethyl (C) (apply to specified residues or termini only)

Variable modifications:

N6 : Deamidated (NQ)

M9 : Oxidation (M), with neutral losses 0.0000(shown in table), 63.9983

Ions Score: 64 Expect: 7.8e-005

Matches : 37/266 fragment ions using 53 most intense peaks ([help](#))

| #  | b                | b <sup>++</sup> | b <sup>*</sup>  | b <sup>*++</sup> | b <sup>0</sup> | b <sup>0++</sup> | Seq.     | y                | y <sup>++</sup> | y <sup>*</sup>   | y <sup>*++</sup> | y <sup>0</sup>   | y <sup>0++</sup> | #         |
|----|------------------|-----------------|-----------------|------------------|----------------|------------------|----------|------------------|-----------------|------------------|------------------|------------------|------------------|-----------|
| 1  | 58.0287          | 29.5180         |                 |                  |                |                  | <b>G</b> |                  |                 |                  |                  |                  |                  | <b>17</b> |
| 2  | 129.0659         | 65.0366         |                 |                  |                |                  | <b>A</b> | 1837.8789        | 919.4431        | 1820.8524        | 910.9298         | 1819.8683        | 910.4378         | <b>16</b> |
| 3  | <b>276.1343</b>  | 138.5708        |                 |                  |                |                  | <b>F</b> | 1766.8418        | <b>883.9245</b> | 1749.8153        | 875.4113         | 1748.8312        | 874.9193         | <b>15</b> |
| 4  | <b>389.2183</b>  | 195.1128        |                 |                  |                |                  | <b>I</b> | 1619.7734        | <b>810.3903</b> | 1602.7468        | <b>801.8771</b>  | 1601.7628        | <b>801.3850</b>  | <b>14</b> |
| 5  | <b>476.2504</b>  | 238.6288        |                 |                  | 458.2398       | 229.6235         | <b>S</b> | <b>1506.6893</b> | <b>753.8483</b> | 1489.6628        | <b>745.3350</b>  | 1488.6788        | <b>744.8430</b>  | <b>13</b> |
| 6  | 591.2773         | 296.1423        | <b>574.2508</b> | 287.6290         | 573.2667       | 287.1370         | <b>N</b> | 1419.6573        | <b>710.3323</b> | 1402.6307        | 701.8190         | 1401.6467        | 701.3270         | <b>12</b> |
| 7  | 738.3457         | 369.6765        | 721.3192        | <b>361.1632</b>  | 720.3352       | <b>360.6712</b>  | <b>F</b> | 1304.6304        | <b>652.8188</b> | <b>1287.6038</b> | 644.3055         | <b>1286.6198</b> | 643.8135         | <b>11</b> |
| 8  | 825.3777         | 413.1925        | 808.3512        | 404.6792         | 807.3672       | 404.1872         | <b>S</b> | 1157.5619        | <b>579.2846</b> | 1140.5354        | <b>570.7713</b>  | 1139.5514        | <b>570.2793</b>  | <b>10</b> |
| 9  | 972.4131         | 486.7102        | 955.3866        | 478.1969         | 954.4026       | 477.7049         | <b>M</b> | 1070.5299        | <b>535.7686</b> | 1053.5034        | 527.2553         | 1052.5193        | 526.7633         | <b>9</b>  |
| 10 | 1073.4608        | 537.2340        | 1056.4343       | 528.7208         | 1055.4503      | 528.2288         | <b>T</b> | <b>923.4945</b>  | <b>462.2509</b> | 906.4680         | 453.7376         | 905.4839         | 453.2456         | <b>8</b>  |
| 11 | <b>1172.5292</b> | 586.7683        | 1155.5027       | 578.2550         | 1154.5187      | 577.7630         | <b>V</b> | 822.4468         | 411.7271        | 805.4203         | 403.2138         | 804.4363         | 402.7218         | <b>7</b>  |
| 12 | <b>1287.5562</b> | 644.2817        | 1270.5296       | 635.7685         | 1269.5456      | 635.2764         | <b>D</b> | 723.3784         | <b>362.1928</b> | 706.3519         | 353.6796         | 705.3679         | 353.1876         | <b>6</b>  |
| 13 | 1344.5776        | 672.7925        | 1327.5511       | 664.2792         | 1326.5671      | 663.7872         | <b>G</b> | 608.3515         | <b>304.6794</b> | 591.3249         | 296.1661         | <b>590.3409</b>  | 295.6741         | <b>5</b>  |
| 14 | 1472.6726        | 736.8399        | 1455.6461       | 728.3267         | 1454.6620      | 727.8347         | <b>K</b> | 551.3300         | <b>276.1686</b> | 534.3035         | 267.6554         | 533.3194         | 267.1634         | <b>4</b>  |
| 15 | 1573.7203        | 787.3638        | 1556.6937       | 778.8505         | 1555.7097      | 778.3585         | <b>T</b> | <b>423.2350</b>  | 212.1212        | 406.2085         | 203.6079         | 405.2245         | 203.1159         | <b>3</b>  |
| 16 | 1720.7887        | 860.8980        | 1703.7622       | 852.3847         | 1702.7781      | 851.8927         | <b>F</b> | 322.1874         | 161.5973        | <b>305.1608</b>  | 153.0840         |                  |                  | <b>2</b>  |
| 17 |                  |                 |                 |                  |                |                  | <b>R</b> | 175.1190         | 88.0631         | 158.0924         | 79.5498          |                  |                  | <b>1</b>  |

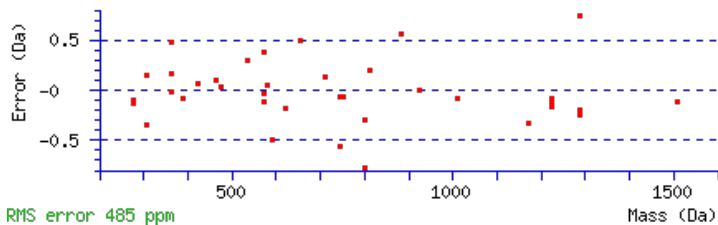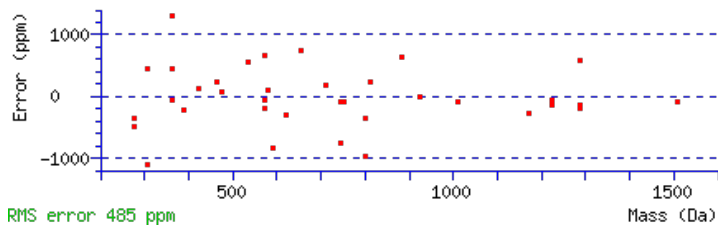

NCBI **BLAST** search of [GAFISNFSMTVDGKTFR](#)

(Parameters: blastp, nr protein database, expect=20000, no filter, PAM30)

Other BLAST [web gateways](#)

**All matches to this query**

| Score | Mr(calc)  | Delta   | Sequence                           |
|-------|-----------|---------|------------------------------------|
| 64.4  | 1893.8931 | 0.0024  | <a href="#">GAFISNFSMTVDGKTFR</a>  |
| 13.9  | 1893.8859 | 0.0096  | <a href="#">DCLCAKCTLIAERQR</a>    |
| 10.5  | 1893.8951 | 0.0004  | <a href="#">ELTMNDMLTQVQVLEK</a>   |
| 9.8   | 1893.9037 | -0.0081 | <a href="#">MKLISNGGDSAVEMDRR</a>  |
| 8.6   | 1893.8899 | 0.0056  | <a href="#">MMVNNYRPLQPLMNR</a>    |
| 8.1   | 1892.8859 | 1.0096  | <a href="#">LSGSHAMEMSQLLSELK</a>  |
| 7.6   | 1893.8924 | 0.0031  | <a href="#">ASCVNAMEGKKLAQDVR</a>  |
| 6.9   | 1893.8989 | -0.0034 | <a href="#">KOMVSAQETINQQITR</a>   |
| 5.2   | 1892.8851 | 1.0104  | <a href="#">GQSTVGTEVTSQVDNLOK</a> |
| 5.2   | 1892.8972 | 0.9984  | <a href="#">GKSDLPCSSMNLAIQIQ</a>  |

Mascot: <http://www.matrixscience.com/>

# MASCOT SCIENCE Mascot Search Results

## Peptide View

MS/MS Fragmentation of **LGHC PDPVLVNGEFSSSGPVNVSDK**

Found in **E7EQ T9** in **con\_Xuniprot\_HUMAN3**, E7EQ T9\_HUMAN C4b-binding protein beta chain OS=Homo sapiens GN=C4BPB PE=2 SV=1

Match to Query 22237: 2611.229682 from(871.417170,3+) intensity(46794.3828) rtinseconds(1191) scans(2996) index(6320)

Title: 111019\_Est\_ISCardio\_NMI\_YP\_G\_9Spectrum2639\_scans\_\_2996

Data file C:\mascot\20140703\_Tmgf\_1D\CSV\_UseAnalysis\MasterCSV\All\_Glyco\mgf\ptm\UC18ERLIC\_PTM\_35D.mgf

Click mouse within plot area to zoom in by factor of two about that point

Or, to Da

Label all possible matches Label matches used for scoring

Show Y-axis

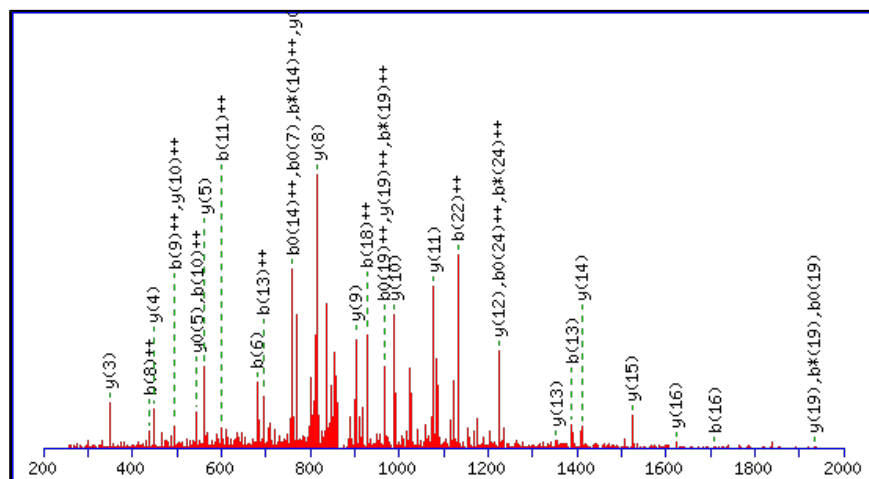

Monoisotopic mass of neutral peptide Mr(calc): 2611.2225

Fixed modifications: Carbamidomethyl (C) (apply to specified residues or termini only)

Variable modifications:

N21 : Deamidated (NQ)

Ions Score: 109 Expect: 2.8e-009

Matches : 36/256 fragment ions using 34 most intense peaks ([help](#))

| #  | b                | b <sup>++</sup>  | b <sup>*</sup>   | b <sup>*++</sup> | b <sup>0</sup>   | b <sup>0++</sup> | Seq. | y                | y <sup>++</sup> | y <sup>*</sup> | y <sup>*++</sup> | y <sup>0</sup>  | y <sup>0++</sup> | #  |
|----|------------------|------------------|------------------|------------------|------------------|------------------|------|------------------|-----------------|----------------|------------------|-----------------|------------------|----|
| 1  | 114.0913         | 57.5493          |                  |                  |                  |                  | L    |                  |                 |                |                  |                 |                  | 25 |
| 2  | 171.1128         | 86.0600          |                  |                  |                  |                  | G    | 2499.1456        | 1250.0765       | 2482.1191      | 1241.5632        | 2481.1351       | 1241.0712        | 24 |
| 3  | 308.1717         | 154.5895         |                  |                  |                  |                  | H    | 2442.1242        | 1221.5657       | 2425.0976      | 1213.0525        | 2424.1136       | 1212.5604        | 23 |
| 4  | 468.2024         | 234.6048         |                  |                  |                  |                  | C    | 2305.0653        | 1153.0363       | 2288.0387      | 1144.5230        | 2287.0547       | 1144.0310        | 22 |
| 5  | 565.2551         | 283.1312         |                  |                  |                  |                  | P    | 2145.0346        | 1073.0209       | 2128.0081      | 1064.5077        | 2127.0241       | 1064.0157        | 21 |
| 6  | <b>680.2821</b>  | 340.6447         |                  |                  | 662.2715         | 331.6394         | D    | 2047.9819        | 1024.4946       | 2030.9553      | 1015.9813        | 2029.9713       | 1015.4893        | 20 |
| 7  | 777.3348         | 389.1711         |                  |                  | <b>759.3243</b>  | 380.1658         | P    | <b>1932.9549</b> | <b>966.9811</b> | 1915.9284      | 958.4678         | 1914.9443       | 957.9758         | 19 |
| 8  | 876.4033         | <b>438.7053</b>  |                  |                  | 858.3927         | 429.7000         | V    | 1835.9021        | 918.4547        | 1818.8756      | 909.9414         | 1817.8916       | 909.4494         | 18 |
| 9  | 989.4873         | <b>495.2473</b>  |                  |                  | 971.4767         | 486.2420         | L    | 1736.8337        | 868.9205        | 1719.8072      | 860.4072         | 1718.8232       | 859.9152         | 17 |
| 10 | 1088.5557        | <b>544.7815</b>  |                  |                  | 1070.5452        | 535.7762         | V    | <b>1623.7497</b> | 812.3785        | 1606.7231      | 803.8652         | 1605.7391       | 803.3732         | 16 |
| 11 | 1202.5987        | <b>601.8030</b>  | 1185.5721        | 593.2897         | 1184.5881        | 592.7977         | N    | <b>1524.6813</b> | 762.8443        | 1507.6547      | 754.3310         | 1506.6707       | 753.8390         | 15 |
| 12 | 1259.6201        | 630.3137         | 1242.5936        | 621.8004         | 1241.6096        | 621.3084         | G    | <b>1410.6383</b> | 705.8228        | 1393.6118      | 697.3095         | 1392.6278       | 696.8175         | 14 |
| 13 | <b>1388.6627</b> | <b>694.8350</b>  | 1371.6362        | 686.3217         | 1370.6521        | 685.8297         | E    | <b>1353.6169</b> | 677.3121        | 1336.5903      | 668.7988         | 1335.6063       | 668.3068         | 13 |
| 14 | 1535.7311        | 768.3692         | 1518.7046        | <b>759.8559</b>  | 1517.7206        | <b>759.3639</b>  | F    | <b>1224.5743</b> | 612.7908        | 1207.5477      | 604.2775         | 1206.5637       | 603.7855         | 12 |
| 15 | 1622.7632        | 811.8852         | 1605.7366        | 803.3719         | 1604.7526        | 802.8799         | S    | <b>1077.5059</b> | 539.2566        | 1060.4793      | 530.7433         | 1059.4953       | 530.2513         | 11 |
| 16 | <b>1709.7952</b> | 855.4012         | 1692.7686        | 846.8880         | 1691.7846        | 846.3959         | S    | <b>990.4738</b>  | <b>495.7406</b> | 973.4473       | 487.2273         | 972.4633        | 486.7353         | 10 |
| 17 | 1796.8272        | 898.9172         | 1779.8007        | 890.4040         | 1778.8166        | 889.9120         | S    | <b>903.4418</b>  | 452.2245        | 886.4153       | 443.7113         | 885.4312        | 443.2193         | 9  |
| 18 | 1853.8487        | <b>927.4280</b>  | 1836.8221        | 918.9147         | 1835.8381        | 918.4227         | G    | <b>816.4098</b>  | 408.7085        | 799.3832       | 400.1953         | 798.3992        | 399.7032         | 8  |
| 19 | 1950.9014        | 975.9544         | <b>1933.8749</b> | <b>967.4411</b>  | <b>1932.8909</b> | <b>966.9491</b>  | P    | <b>759.3883</b>  | 380.1978        | 742.3618       | 371.6845         | 741.3777        | 371.1925         | 7  |
| 20 | 2049.9699        | 1025.4886        | 2032.9433        | 1016.9753        | 2031.9593        | 1016.4833        | V    | 662.3355         | 331.6714        | 645.3090       | 323.1581         | 644.3250        | 322.6661         | 6  |
| 21 | 2164.9968        | 1083.0020        | 2147.9702        | 1074.4888        | 2146.9862        | 1073.9968        | N    | <b>563.2671</b>  | 282.1372        | 546.2406       | 273.6239         | <b>545.2566</b> | 273.1319         | 5  |
| 22 | 2264.0652        | <b>1132.5362</b> | 2247.0387        | 1124.0230        | 2246.0546        | 1123.5310        | V    | <b>448.2402</b>  | 224.6237        | 431.2136       | 216.1105         | 430.2296        | 215.6184         | 4  |
| 23 | 2351.0972        | 1176.0523        | 2334.0707        | 1167.5390        | 2333.0867        | 1167.0470        | S    | <b>349.1718</b>  | 175.0895        | 332.1452       | 166.5763         | 331.1612        | 166.0842         | 3  |

|    |           |           |           |           |           |           |   |          |          |          |          |          |          |   |
|----|-----------|-----------|-----------|-----------|-----------|-----------|---|----------|----------|----------|----------|----------|----------|---|
| 24 | 2466.1242 | 1233.5657 | 2449.0976 | 1225.0525 | 2448.1136 | 1224.5604 | D | 262.1397 | 131.5735 | 245.1132 | 123.0602 | 244.1292 | 122.5682 | 2 |
| 25 |           |           |           |           |           |           | K | 147.1128 | 74.0600  | 130.0863 | 65.5468  |          |          | 1 |

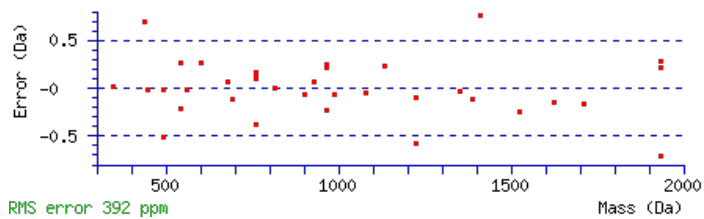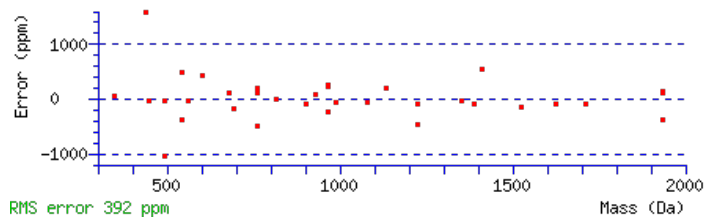

NCBI BLAST search of [LGHCPDPVLVNGEFSSSGPVNVSDK](#)  
 (Parameters: blastp, nr protein database, expect=20000, no filter, PAM30)  
 Other BLAST [web gateways](#)

All matches to this query

| Score | Mr(calc)  | Delta  | Sequence                                  | Site Analysis          |
|-------|-----------|--------|-------------------------------------------|------------------------|
| 109.3 | 2611.2225 | 0.0072 | <a href="#">LGHCPDPVLVNGEFSSSGPVNVSDK</a> | Deamidated N21 100.00% |
| 60.4  | 2611.2225 | 0.0072 | <a href="#">LGHCPDPVLVNGEFSSSGPVNVSDK</a> | Deamidated N11 0.00%   |
| 38.6  | 2610.2384 | 0.9912 | <a href="#">LGHCPDPVLVNGEFSSSGPVNVSDK</a> |                        |
| 4.4   | 2609.2212 | 2.0085 | <a href="#">KTNATNNMNLRSSSDNNNTLGR</a>    |                        |
| 1.1   | 2611.2297 | 0.0000 | <a href="#">SVTIGRNSSQGSVDVSMGHSSFISR</a> |                        |
| 0.3   | 2611.2258 | 0.0039 | <a href="#">MQVTMSLSSLVGTTONFSEEHLR</a>   |                        |
| 0.3   | 2611.2258 | 0.0039 | <a href="#">MQVTMSLSSLVGTTONFSEEHLR</a>   |                        |

Mascot: <http://www.matrixscience.com/>



# MASCOT SCIENCE Mascot Search Results

## Peptide View

MS/MS Fragmentation of **TLFCNASKEWDNTTTECR**

Found in **E7EQT9** in **con\_Xuniprot\_HUMAN3**, E7EQT9\_HUMAN C4b-binding protein beta chain OS=Homo sapiens GN=C4BPB PE=2 SV=1

Match to Query 14986: 2233.936948 from(1117.975750,2+) intensity(22622.4277) rtinseconds(1475) scans(3513) index(27412)

Title: 111019\_Est\_ML\_YS\_G\_10Spectrum3020\_scans\_\_3513

Data file C:\mascot\20140703\_Tmgf\_1D\CSV\_UseAnalysis\MasterCSV\All\_Glyco\mgf\ptm\UC18ERLIC\_PTM\_35D.mgf

Click mouse within plot area to zoom in by factor of two about that point

Or,  to  Da

Label all possible matches  Label matches used for scoring

Show Y-axis

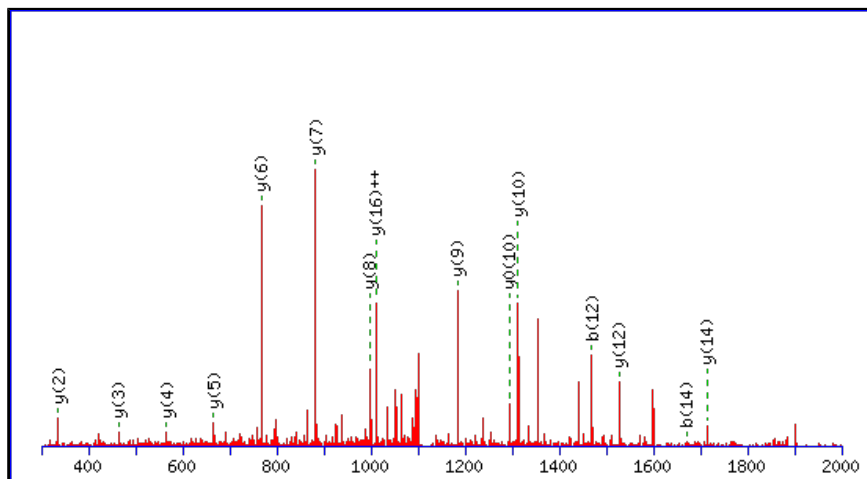

Monoisotopic mass of neutral peptide Mr(calc): 2233.9256

Fixed modifications: Carbamidomethyl (C) (apply to specified residues or termini only)

Variable modifications:

N5 : Deamidated (NQ)

N12 : Deamidated (NQ)

Ions Score: 93 Expect: 1.9e-008

Matches : 15/192 fragment ions using 17 most intense peaks ([help](#))

| #  | b         | b <sup>++</sup> | b <sup>*</sup> | b <sup>*++</sup> | b <sup>0</sup> | b <sup>0++</sup> | Seq. | y         | y <sup>++</sup> | y <sup>*</sup> | y <sup>*++</sup> | y <sup>0</sup> | y <sup>0++</sup> | #  |
|----|-----------|-----------------|----------------|------------------|----------------|------------------|------|-----------|-----------------|----------------|------------------|----------------|------------------|----|
| 1  | 102.0550  | 51.5311         |                |                  | 84.0444        | 42.5258          | T    |           |                 |                |                  |                |                  | 18 |
| 2  | 215.1390  | 108.0731        |                |                  | 197.1285       | 99.0679          | L    | 2133.8852 | 1067.4462       | 2116.8586      | 1058.9330        | 2115.8746      | 1058.4410        | 17 |
| 3  | 362.2074  | 181.6074        |                |                  | 344.1969       | 172.6021         | F    | 2020.8011 | 1010.9042       | 2003.7746      | 1002.3909        | 2002.7906      | 1001.8989        | 16 |
| 4  | 522.2381  | 261.6227        |                |                  | 504.2275       | 252.6174         | C    | 1873.7327 | 937.3700        | 1856.7062      | 928.8567         | 1855.7222      | 928.3647         | 15 |
| 5  | 637.2650  | 319.1362        | 620.2385       | 310.6229         | 619.2545       | 310.1309         | N    | 1713.7021 | 857.3547        | 1696.6755      | 848.8414         | 1695.6915      | 848.3494         | 14 |
| 6  | 708.3021  | 354.6547        | 691.2756       | 346.1414         | 690.2916       | 345.6494         | A    | 1598.6751 | 799.8412        | 1581.6486      | 791.3279         | 1580.6646      | 790.8359         | 13 |
| 7  | 795.3342  | 398.1707        | 778.3076       | 389.6574         | 777.3236       | 389.1654         | S    | 1527.6380 | 764.3226        | 1510.6115      | 755.8094         | 1509.6274      | 755.3174         | 12 |
| 8  | 923.4291  | 462.2182        | 906.4026       | 453.7049         | 905.4186       | 453.2129         | K    | 1440.6060 | 720.8066        | 1423.5794      | 712.2934         | 1422.5954      | 711.8013         | 11 |
| 9  | 1052.4717 | 526.7395        | 1035.4452      | 518.2262         | 1034.4612      | 517.7342         | E    | 1312.5110 | 656.7591        | 1295.4845      | 648.2459         | 1294.5005      | 647.7539         | 10 |
| 10 | 1238.5510 | 619.7792        | 1221.5245      | 611.2659         | 1220.5405      | 610.7739         | W    | 1183.4684 | 592.2379        | 1166.4419      | 583.7246         | 1165.4579      | 583.2326         | 9  |
| 11 | 1353.5780 | 677.2926        | 1336.5514      | 668.7794         | 1335.5674      | 668.2873         | D    | 997.3891  | 499.1982        | 980.3626       | 490.6849         | 979.3786       | 490.1929         | 8  |
| 12 | 1468.6049 | 734.8061        | 1451.5784      | 726.2928         | 1450.5944      | 725.8008         | N    | 882.3622  | 441.6847        | 865.3356       | 433.1715         | 864.3516       | 432.6794         | 7  |
| 13 | 1569.6526 | 785.3299        | 1552.6261      | 776.8167         | 1551.6420      | 776.3247         | T    | 767.3352  | 384.1713        | 750.3087       | 375.6580         | 749.3247       | 375.1660         | 6  |
| 14 | 1670.7003 | 835.8538        | 1653.6737      | 827.3405         | 1652.6897      | 826.8485         | T    | 666.2876  | 333.6474        | 649.2610       | 325.1341         | 648.2770       | 324.6421         | 5  |
| 15 | 1771.7480 | 886.3776        | 1754.7214      | 877.8643         | 1753.7374      | 877.3723         | T    | 565.2399  | 283.1236        | 548.2133       | 274.6103         | 547.2293       | 274.1183         | 4  |
| 16 | 1900.7906 | 950.8989        | 1883.7640      | 942.3856         | 1882.7800      | 941.8936         | E    | 464.1922  | 232.5997        | 447.1656       | 224.0865         | 446.1816       | 223.5945         | 3  |
| 17 | 2060.8212 | 1030.9142       | 2043.7947      | 1022.4010        | 2042.8106      | 1021.9090        | C    | 335.1496  | 168.0784        | 318.1231       | 159.5652         |                |                  | 2  |
| 18 |           |                 |                |                  |                |                  | R    | 175.1190  | 88.0631         | 158.0924       | 79.5498          |                |                  | 1  |

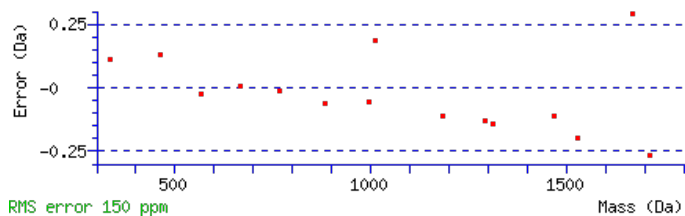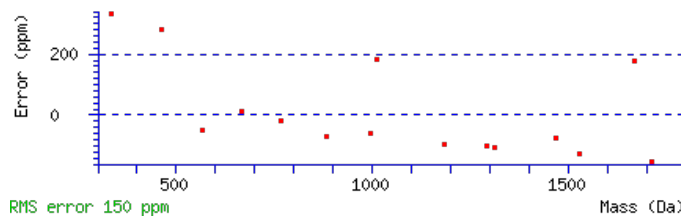

NCBI **BLAST** search of [TLFCNASKewDNTTTECR](#)

(Parameters: blastp, nr protein database, expect=20000, no filter, PAM30)

Other BLAST [web gateways](#)

**All matches to this query**

| Score | Mr(calc)  | Delta  | Sequence                           |
|-------|-----------|--------|------------------------------------|
| 93.1  | 2233.9256 | 0.0114 | <a href="#">TLFCNASKewDNTTTECR</a> |
| 84.1  | 2232.9416 | 0.9954 | <a href="#">TLFCNASKewDNTTTECR</a> |
| 29.1  | 2232.9416 | 0.9954 | <a href="#">TLFCNASKewDNTTTECR</a> |

Mascot: <http://www.matrixscience.com/>

# MATRIX SCIENCE Mascot Search Results

## Peptide View

MS/MS Fragmentation of **LGHCDDPVLVNGEFSSSGPVNVSDK**

Found in **E7EQT9** in **con\_Xuniprot\_HUMAN3**, E7EQT9\_HUMAN C4b-binding protein beta chain OS=Homo sapiens GN=C4BPB PE=2 SV=1

Match to Query 22292: 2612.219352 from(871.747060,3+) intensity(69056.0781) rtinseconds(1744) scans(3986) index(16786)

Title: 111019\_Est\_ML\_YP\_G\_06Spectrum3315\_scans\_\_3986

Data file C:\mascot\20140703\_Tmgf\_1D\CSV\_UseAnalysis\MasterCSV\All\_Glyco\mgf\ptm\UC18ERLIC\_PTM\_35D.mgf

Click mouse within plot area to zoom in by factor of two about that point

Or, to Da

Label all possible matches Label matches used for scoring

Show Y-axis

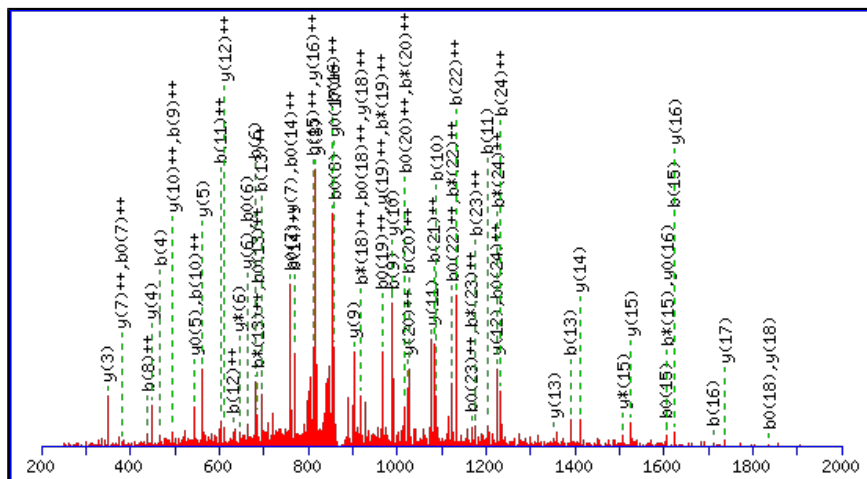

Monoisotopic mass of neutral peptide Mr(calc): 2612.2065

Fixed modifications: Carbamidomethyl (C) (apply to specified residues or termini only)

Variable modifications:

N11 : Deamidated (NQ)

N21 : Deamidated (NQ)

Ions Score: 85 Expect: 6.5e-007

Matches : 72/256 fragment ions using 111 most intense peaks ([help](#))

| #  | b                | b <sup>++</sup>  | b <sup>*</sup>   | b <sup>*++</sup> | b <sup>0</sup>   | b <sup>0++</sup> | Seq. | y                | y <sup>++</sup>  | y <sup>*</sup>   | y <sup>*++</sup> | y <sup>0</sup>   | y <sup>0++</sup> | #  |
|----|------------------|------------------|------------------|------------------|------------------|------------------|------|------------------|------------------|------------------|------------------|------------------|------------------|----|
| 1  | 114.0913         | 57.5493          |                  |                  |                  |                  | L    |                  |                  |                  |                  |                  |                  | 25 |
| 2  | 171.1128         | 86.0600          |                  |                  |                  |                  | G    | 2500.1297        | 1250.5685        | 2483.1031        | 1242.0552        | 2482.1191        | 1241.5632        | 24 |
| 3  | 308.1717         | 154.5895         |                  |                  |                  |                  | H    | 2443.1082        | 1222.0577        | 2426.0816        | 1213.5445        | 2425.0976        | 1213.0525        | 23 |
| 4  | <b>468.2024</b>  | 234.6048         |                  |                  |                  |                  | C    | 2306.0493        | 1153.5283        | 2289.0227        | 1145.0150        | 2288.0387        | 1144.5230        | 22 |
| 5  | 565.2551         | 283.1312         |                  |                  |                  |                  | P    | 2146.0186        | 1073.5130        | 2128.9921        | 1064.9997        | 2128.0081        | 1064.5077        | 21 |
| 6  | <b>680.2821</b>  | 340.6447         |                  |                  | 662.2715         | 331.6394         | D    | 2048.9659        | <b>1024.9866</b> | 2031.9393        | 1016.4733        | 2030.9553        | 1015.9813        | 20 |
| 7  | 777.3348         | 389.1711         |                  |                  | 759.3243         | 380.1658         | P    | 1933.9389        | <b>967.4731</b>  | 1916.9124        | 958.9598         | 1915.9284        | 958.4678         | 19 |
| 8  | 876.4033         | <b>438.7053</b>  |                  |                  | 858.3927         | 429.7000         | V    | <b>1836.8862</b> | <b>918.9467</b>  | 1819.8596        | 910.4334         | 1818.8756        | 909.9414         | 18 |
| 9  | <b>989.4873</b>  | <b>495.2473</b>  |                  |                  | 971.4767         | 486.2420         | L    | <b>1737.8177</b> | 869.4125         | 1720.7912        | 860.8992         | 1719.8072        | <b>860.4072</b>  | 17 |
| 10 | <b>1088.5557</b> | <b>544.7815</b>  |                  |                  | 1070.5452        | 535.7762         | V    | <b>1624.7337</b> | <b>812.8705</b>  | 1607.7071        | 804.3572         | <b>1606.7231</b> | 803.8652         | 16 |
| 11 | <b>1203.5827</b> | <b>602.2950</b>  | 1186.5561        | 593.7817         | 1185.5721        | 593.2897         | N    | <b>1525.6653</b> | 763.3363         | <b>1508.6387</b> | 754.8230         | 1507.6547        | 754.3310         | 15 |
| 12 | 1260.6041        | <b>630.8057</b>  | 1243.5776        | 622.2924         | 1242.5936        | 621.8004         | G    | <b>1410.6383</b> | 705.8228         | 1393.6118        | 697.3095         | 1392.6278        | 696.8175         | 14 |
| 13 | <b>1389.6467</b> | <b>695.3270</b>  | 1372.6202        | <b>686.8137</b>  | 1371.6362        | <b>686.3217</b>  | E    | <b>1353.6169</b> | 677.3121         | 1336.5903        | 668.7988         | 1335.6063        | 668.3068         | 13 |
| 14 | 1536.7151        | <b>768.8612</b>  | 1519.6886        | 760.3479         | 1518.7046        | <b>759.8559</b>  | F    | <b>1224.5743</b> | <b>612.7908</b>  | 1207.5477        | 604.2775         | 1206.5637        | 603.7855         | 12 |
| 15 | <b>1623.7472</b> | <b>812.3772</b>  | <b>1606.7206</b> | 803.8639         | <b>1605.7366</b> | 803.3719         | S    | <b>1077.5059</b> | 539.2566         | 1060.4793        | 530.7433         | 1059.4953        | 530.2513         | 11 |
| 16 | <b>1710.7792</b> | <b>855.8932</b>  | 1693.7526        | 847.3800         | 1692.7686        | 846.8880         | S    | <b>990.4738</b>  | <b>495.7406</b>  | 973.4473         | 487.2273         | 972.4633         | 486.7353         | 10 |
| 17 | 1797.8112        | 899.4093         | 1780.7847        | 890.8960         | 1779.8007        | 890.4040         | S    | <b>903.4418</b>  | 452.2245         | 886.4153         | 443.7113         | 885.4312         | 443.2193         | 9  |
| 18 | 1854.8327        | 927.9200         | 1837.8061        | <b>919.4067</b>  | <b>1836.8221</b> | <b>918.9147</b>  | G    | <b>816.4098</b>  | 408.7085         | 799.3832         | 400.1953         | 798.3992         | 399.7032         | 8  |
| 19 | 1951.8855        | 976.4464         | 1934.8589        | <b>967.9331</b>  | 1933.8749        | <b>967.4411</b>  | P    | <b>759.3883</b>  | <b>380.1978</b>  | 742.3618         | 371.6845         | 741.3777         | 371.1925         | 7  |
| 20 | 2050.9539        | <b>1025.9806</b> | 2033.9273        | <b>1017.4673</b> | 2032.9433        | <b>1016.9753</b> | V    | <b>662.3355</b>  | 331.6714         | <b>645.3090</b>  | 323.1581         | 644.3250         | 322.6661         | 6  |
| 21 | 2165.9808        | <b>1083.4940</b> | 2148.9543        | 1074.9808        | 2147.9702        | 1074.4888        | N    | <b>563.2671</b>  | 282.1372         | 546.2406         | 273.6239         | <b>545.2566</b>  | 273.1319         | 5  |
| 22 | 2265.0492        | <b>1133.0283</b> | 2248.0227        | <b>1124.5150</b> | 2247.0387        | <b>1124.0230</b> | V    | <b>448.2402</b>  | 224.6237         | 431.2136         | 216.1105         | 430.2296         | 215.6184         | 4  |

|    |           |                  |           |                  |           |                  |   |                 |          |          |          |          |          |   |
|----|-----------|------------------|-----------|------------------|-----------|------------------|---|-----------------|----------|----------|----------|----------|----------|---|
| 23 | 2352.0813 | <b>1176.5443</b> | 2335.0547 | <b>1168.0310</b> | 2334.0707 | <b>1167.5390</b> | S | <b>349.1718</b> | 175.0895 | 332.1452 | 166.5763 | 331.1612 | 166.0842 | 3 |
| 24 | 2467.1082 | <b>1234.0577</b> | 2450.0816 | <b>1225.5445</b> | 2449.0976 | <b>1225.0525</b> | D | 262.1397        | 131.5735 | 245.1132 | 123.0602 | 244.1292 | 122.5682 | 2 |
| 25 |           |                  |           |                  |           |                  | K | 147.1128        | 74.0600  | 130.0863 | 65.5468  |          |          | 1 |

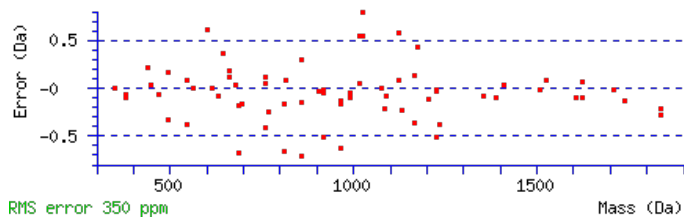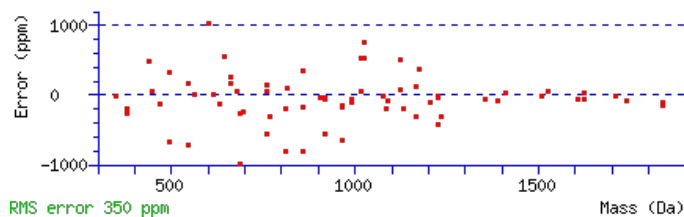

NCBI BLAST search of [LGHC PDPVLVNGEFSSSGPVNVSDK](#)  
 (Parameters: blastp, nr protein database, expect=20000, no filter, PAM30)  
 Other BLAST [web gateways](#)

All matches to this query

| Score | Mr(calc)  | Delta  | Sequence                                    |
|-------|-----------|--------|---------------------------------------------|
| 85.2  | 2612.2065 | 0.0129 | <a href="#">LGHC PDPVLVNGEFSSSGPVNVSDK</a>  |
| 66.0  | 2611.2225 | 0.9969 | <a href="#">LGHC PDPVLVNGEFSSSGPVNVSDK</a>  |
| 49.6  | 2611.2225 | 0.9969 | <a href="#">LGHC PDPVLVNGEFSSSGPVNVSDK</a>  |
| 7.0   | 2611.2249 | 0.9945 | <a href="#">RPDVVENQPDAASQLNVDASGNLAK</a>   |
| 5.8   | 2612.2137 | 0.0057 | <a href="#">SVTIGRNSSQGSVDVSMGHSSFISR</a>   |
| 4.6   | 2611.2249 | 0.9945 | <a href="#">RPDVVENQPDAASQLNVDASGNLAK</a>   |
| 4.5   | 2611.2146 | 1.0048 | <a href="#">LVSTSGSSAQASMIDMEAKSTDSEK</a>   |
| 4.5   | 2611.2112 | 1.0082 | <a href="#">LAEFAKAGEDGVQNGWMGVESISK</a>    |
| 4.0   | 2610.2007 | 2.0187 | <a href="#">QLIESSIPETQIQDRCONVSDK</a>      |
| 3.6   | 2611.2072 | 1.0122 | <a href="#">LTPGPPSASTAPPSAGCSEEGAAAEAK</a> |

Mascot: <http://www.matrixscience.com/>

# MASCOT SCIENCE Mascot Search Results

## Peptide View

MS/MS Fragmentation of **TLFCNASKEWDNTTTECR**

Found in **E7EQT9** in **con\_Xuniprot\_HUMAN3**, E7EQT9\_HUMAN C4b-binding protein beta chain OS=Homo sapiens GN=C4BPB PE=2 SV=1

Match to Query 14989: 2233.939348 from(1117.976950,2+) intensity(11150.5088) rtinseconds(1410) scans(3370) index(7021)

Title: 111019\_Est\_ISCardio\_NMI\_YP\_G\_10Spectrum2920\_scans\_3370

Data file C:\mascot\20140703\_Tmgf\_1D\CSV\_UseAnalysis\MasterCSV\All\_Glyco\mgf\ptm\UC18ERLIC\_PTM\_35D.mgf

Click mouse within plot area to zoom in by factor of two about that point

Or,  to  Da

Label all possible matches  Label matches used for scoring

Show Y-axis

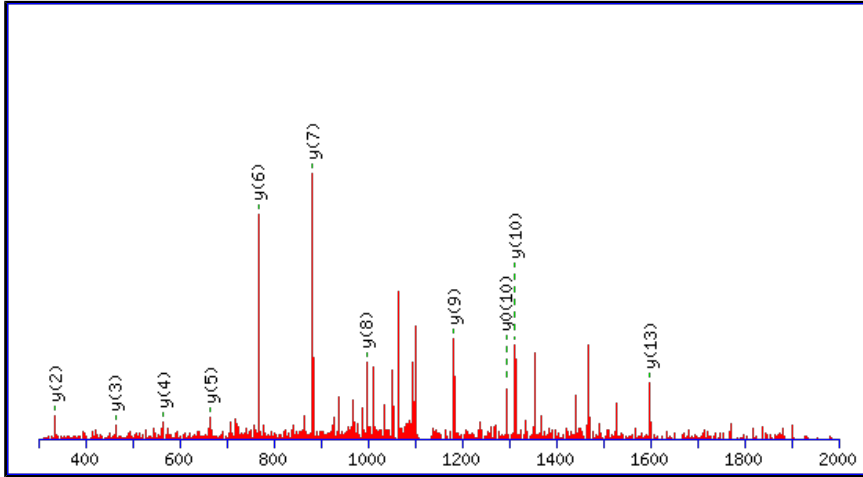

Monoisotopic mass of neutral peptide Mr(calc): 2232.9416

Fixed modifications: Carbamidomethyl (C) (apply to specified residues or termini only)

Variable modifications:

N12 : Deamidated (NQ)

Ions Score: 68 Expect: 5.5e-006

Matches : 11/192 fragment ions using 17 most intense peaks ([help](#))

| #  | b         | b <sup>++</sup> | b*        | b <sup>*++</sup> | b <sup>0</sup> | b <sup>0++</sup> | Seq. | y                | y <sup>++</sup> | y*        | y <sup>*++</sup> | y <sup>0</sup>   | y <sup>0++</sup> | #  |
|----|-----------|-----------------|-----------|------------------|----------------|------------------|------|------------------|-----------------|-----------|------------------|------------------|------------------|----|
| 1  | 102.0550  | 51.5311         |           |                  | 84.0444        | 42.5258          | T    |                  |                 |           |                  |                  |                  | 18 |
| 2  | 215.1390  | 108.0731        |           |                  | 197.1285       | 99.0679          | L    | 2132.9012        | 1066.9542       | 2115.8746 | 1058.4410        | 2114.8906        | 1057.9489        | 17 |
| 3  | 362.2074  | 181.6074        |           |                  | 344.1969       | 172.6021         | F    | 2019.8171        | 1010.4122       | 2002.7906 | 1001.8989        | 2001.8066        | 1001.4069        | 16 |
| 4  | 522.2381  | 261.6227        |           |                  | 504.2275       | 252.6174         | C    | 1872.7487        | 936.8780        | 1855.7222 | 928.3647         | 1854.7381        | 927.8727         | 15 |
| 5  | 636.2810  | 318.6441        | 619.2545  | 310.1309         | 618.2704       | 309.6389         | N    | 1712.7181        | 856.8627        | 1695.6915 | 848.3494         | 1694.7075        | 847.8574         | 14 |
| 6  | 707.3181  | 354.1627        | 690.2916  | 345.6494         | 689.3076       | 345.1574         | A    | <b>1598.6751</b> | 799.8412        | 1581.6486 | 791.3279         | 1580.6646        | 790.8359         | 13 |
| 7  | 794.3502  | 397.6787        | 777.3236  | 389.1654         | 776.3396       | 388.6734         | S    | 1527.6380        | 764.3226        | 1510.6115 | 755.8094         | 1509.6274        | 755.3174         | 12 |
| 8  | 922.4451  | 461.7262        | 905.4186  | 453.2129         | 904.4345       | 452.7209         | K    | 1440.6060        | 720.8066        | 1423.5794 | 712.2934         | 1422.5954        | 711.8013         | 11 |
| 9  | 1051.4877 | 526.2475        | 1034.4612 | 517.7342         | 1033.4771      | 517.2422         | E    | <b>1312.5110</b> | 656.7591        | 1295.4845 | 648.2459         | <b>1294.5005</b> | 647.7539         | 10 |
| 10 | 1237.5670 | 619.2871        | 1220.5405 | 610.7739         | 1219.5565      | 610.2819         | W    | <b>1183.4684</b> | 592.2379        | 1166.4419 | 583.7246         | 1165.4579        | 583.2326         | 9  |
| 11 | 1352.5940 | 676.8006        | 1335.5674 | 668.2873         | 1334.5834      | 667.7953         | D    | <b>997.3891</b>  | 499.1982        | 980.3626  | 490.6849         | 979.3786         | 490.1929         | 8  |
| 12 | 1467.6209 | 734.3141        | 1450.5944 | 725.8008         | 1449.6103      | 725.3088         | N    | <b>882.3622</b>  | 441.6847        | 865.3356  | 433.1715         | 864.3516         | 432.6794         | 7  |
| 13 | 1568.6686 | 784.8379        | 1551.6420 | 776.3247         | 1550.6580      | 775.8326         | T    | <b>767.3352</b>  | 384.1713        | 750.3087  | 375.6580         | 749.3247         | 375.1660         | 6  |
| 14 | 1669.7163 | 835.3618        | 1652.6897 | 826.8485         | 1651.7057      | 826.3565         | T    | <b>666.2876</b>  | 333.6474        | 649.2610  | 325.1341         | 648.2770         | 324.6421         | 5  |
| 15 | 1770.7639 | 885.8856        | 1753.7374 | 877.3723         | 1752.7534      | 876.8803         | T    | <b>565.2399</b>  | 283.1236        | 548.2133  | 274.6103         | 547.2293         | 274.1183         | 4  |
| 16 | 1899.8065 | 950.4069        | 1882.7800 | 941.8936         | 1881.7960      | 941.4016         | E    | <b>464.1922</b>  | 232.5997        | 447.1656  | 224.0865         | 446.1816         | 223.5945         | 3  |
| 17 | 2059.8372 | 1030.4222       | 2042.8106 | 1021.9090        | 2041.8266      | 1021.4169        | C    | <b>335.1496</b>  | 168.0784        | 318.1231  | 159.5652         |                  |                  | 2  |
| 18 |           |                 |           |                  |                |                  | R    | 175.1190         | 88.0631         | 158.0924  | 79.5498          |                  |                  | 1  |

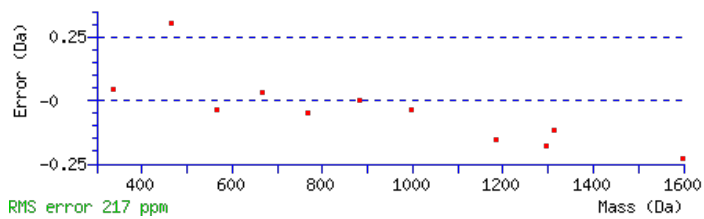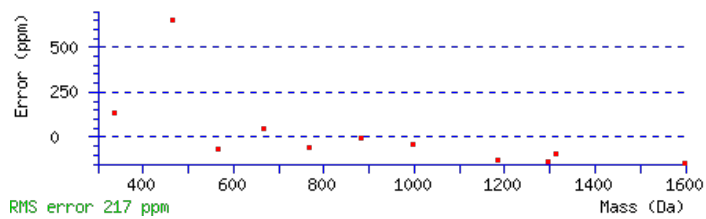

NCBI BLAST search of [TLFCNASKPWDNTTTECR](#)

(Parameters: blastp, nr protein database, expect=20000, no filter, PAM30)

Other BLAST [web gateways](#)

**All matches to this query**

| Score | Mr(calc)  | Delta  | Sequence                           | Site Analysis          |
|-------|-----------|--------|------------------------------------|------------------------|
| 68.2  | 2232.9416 | 0.9978 | <a href="#">TLFCNASKPWDNTTTECR</a> | Deamidated N12 100.00% |
| 18.0  | 2232.9416 | 0.9978 | <a href="#">TLFCNASKPWDNTTTECR</a> | Deamidated N5 0.00%    |

Mascot: <http://www.matrixscience.com/>

# MASCOT SCIENCE Mascot Search Results

## Peptide View

MS/MS Fragmentation of **KTLFCNASKEWDNTTTECR**

Found in **E7EQT9** in **con\_Xuniprot\_HUMAN3**, E7EQT9\_HUMAN C4b-binding protein beta chain OS=Homo sapiens GN=C4BPB PE=2 SV=1

Match to Query 17891: 2362.028682 from(788.350170,3+) intensity(28577.5078) rtinseconds(1020) scans(2404) index(2563)

Title: 111019\_Est\_ISCardio\_NMI\_YP\_G\_5Spectrum2037\_scans\_\_2404

Data file C:\mascot\20140703\_Tmgf\_1D\CSV\_UseAnalysis\MasterCSV\All\_Glyco\mgf\ptm\UC18ERLIC\_PTM\_35D.mgf

Click mouse within plot area to zoom in by factor of two about that point

Or,  to  Da

Label all possible matches  Label matches used for scoring

Show Y-axis

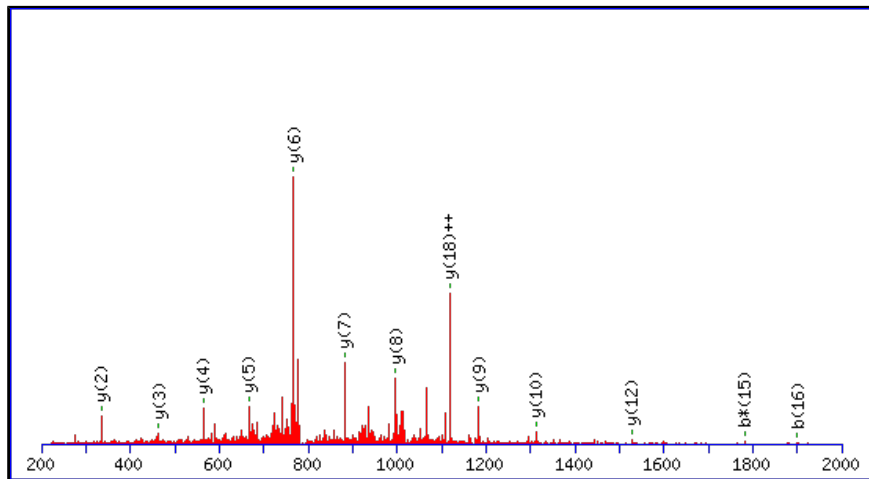

Monoisotopic mass of neutral peptide Mr(calc): 2362.0205

Fixed modifications: Carbamidomethyl (C) (apply to specified residues or termini only)

Variable modifications:

N6 : Deamidated (NQ)

N13 : Deamidated (NQ)

Ions Score: 65 Expect: 3.1e-005

Matches : 13/210 fragment ions using 17 most intense peaks ([help](#))

| #  | b                | b <sup>++</sup> | b*               | b <sup>*++</sup> | b <sup>0</sup> | b <sup>0++</sup> | Seq.     | y                | y <sup>++</sup>  | y*        | y <sup>*++</sup> | y <sup>0</sup> | y <sup>0++</sup> | #         |
|----|------------------|-----------------|------------------|------------------|----------------|------------------|----------|------------------|------------------|-----------|------------------|----------------|------------------|-----------|
| 1  | 129.1022         | 65.0548         | 112.0757         | 56.5415          |                |                  | <b>K</b> |                  |                  |           |                  |                |                  | <b>19</b> |
| 2  | 230.1499         | 115.5786        | 213.1234         | 107.0653         | 212.1394       | 106.5733         | <b>T</b> | 2234.9329        | <b>1117.9701</b> | 2217.9063 | 1109.4568        | 2216.9223      | 1108.9648        | <b>18</b> |
| 3  | 343.2340         | 172.1206        | 326.2074         | 163.6074         | 325.2234       | 163.1153         | <b>L</b> | 2133.8852        | 1067.4462        | 2116.8586 | 1058.9330        | 2115.8746      | 1058.4410        | <b>17</b> |
| 4  | 490.3024         | 245.6548        | 473.2758         | 237.1416         | 472.2918       | 236.6496         | <b>F</b> | 2020.8011        | 1010.9042        | 2003.7746 | 1002.3909        | 2002.7906      | 1001.8989        | <b>16</b> |
| 5  | 650.3330         | 325.6702        | 633.3065         | 317.1569         | 632.3225       | 316.6649         | <b>C</b> | 1873.7327        | 937.3700         | 1856.7062 | 928.8567         | 1855.7222      | 928.3647         | <b>15</b> |
| 6  | 765.3600         | 383.1836        | 748.3334         | 374.6704         | 747.3494       | 374.1783         | <b>N</b> | 1713.7021        | 857.3547         | 1696.6755 | 848.8414         | 1695.6915      | 848.3494         | <b>14</b> |
| 7  | 836.3971         | 418.7022        | 819.3706         | 410.1889         | 818.3865       | 409.6969         | <b>A</b> | 1598.6751        | 799.8412         | 1581.6486 | 791.3279         | 1580.6646      | 790.8359         | <b>13</b> |
| 8  | 923.4291         | 462.2182        | 906.4026         | 453.7049         | 905.4186       | 453.2129         | <b>S</b> | <b>1527.6380</b> | 764.3226         | 1510.6115 | 755.8094         | 1509.6274      | 755.3174         | <b>12</b> |
| 9  | 1051.5241        | 526.2657        | 1034.4975        | 517.7524         | 1033.5135      | 517.2604         | <b>K</b> | 1440.6060        | 720.8066         | 1423.5794 | 712.2934         | 1422.5954      | 711.8013         | <b>11</b> |
| 10 | 1180.5667        | 590.7870        | 1163.5401        | 582.2737         | 1162.5561      | 581.7817         | <b>E</b> | <b>1312.5110</b> | 656.7591         | 1295.4845 | 648.2459         | 1294.5005      | 647.7539         | <b>10</b> |
| 11 | 1366.6460        | 683.8266        | 1349.6194        | 675.3134         | 1348.6354      | 674.8214         | <b>W</b> | <b>1183.4684</b> | 592.2379         | 1166.4419 | 583.7246         | 1165.4579      | 583.2326         | <b>9</b>  |
| 12 | 1481.6729        | 741.3401        | 1464.6464        | 732.8268         | 1463.6624      | 732.3348         | <b>D</b> | <b>997.3891</b>  | 499.1982         | 980.3626  | 490.6849         | 979.3786       | 490.1929         | <b>8</b>  |
| 13 | 1596.6999        | 798.8536        | 1579.6733        | 790.3403         | 1578.6893      | 789.8483         | <b>N</b> | <b>882.3622</b>  | 441.6847         | 865.3356  | 433.1715         | 864.3516       | 432.6794         | <b>7</b>  |
| 14 | 1697.7476        | 849.3774        | 1680.7210        | 840.8641         | 1679.7370      | 840.3721         | <b>T</b> | <b>767.3352</b>  | 384.1713         | 750.3087  | 375.6580         | 749.3247       | 375.1660         | <b>6</b>  |
| 15 | 1798.7952        | 899.9013        | <b>1781.7687</b> | 891.3880         | 1780.7847      | 890.8960         | <b>T</b> | <b>666.2876</b>  | 333.6474         | 649.2610  | 325.1341         | 648.2770       | 324.6421         | <b>5</b>  |
| 16 | <b>1899.8429</b> | 950.4251        | 1882.8164        | 941.9118         | 1881.8324      | 941.4198         | <b>T</b> | <b>565.2399</b>  | 283.1236         | 548.2133  | 274.6103         | 547.2293       | 274.1183         | <b>4</b>  |
| 17 | 2028.8855        | 1014.9464       | 2011.8590        | 1006.4331        | 2010.8750      | 1005.9411        | <b>E</b> | <b>464.1922</b>  | 232.5997         | 447.1656  | 224.0865         | 446.1816       | 223.5945         | <b>3</b>  |
| 18 | 2188.9162        | 1094.9617       | 2171.8896        | 1086.4484        | 2170.9056      | 1085.9564        | <b>C</b> | <b>335.1496</b>  | 168.0784         | 318.1231  | 159.5652         |                |                  | <b>2</b>  |
| 19 |                  |                 |                  |                  |                |                  | <b>R</b> | 175.1190         | 88.0631          | 158.0924  | 79.5498          |                |                  | <b>1</b>  |



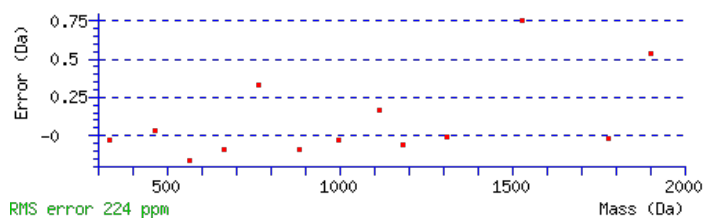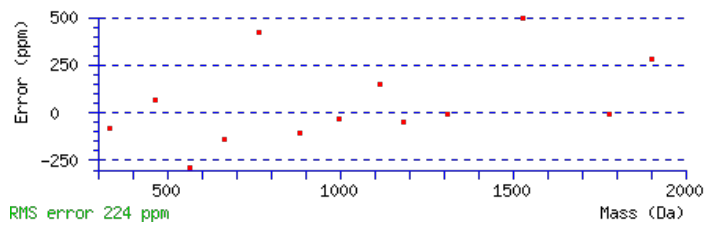

NCBI **BLAST** search of [KTLFCNASKewDNTTTECR](#)

(Parameters: blastp, nr protein database, expect=20000, no filter, PAM30)

Other BLAST [web gateways](#)

**All matches to this query**

| Score | Mr(calc)  | Delta  | Sequence                            |
|-------|-----------|--------|-------------------------------------|
| 64.8  | 2362.0205 | 0.0081 | <a href="#">KTLFCNASKewDNTTTECR</a> |
| 64.8  | 2361.0365 | 0.9922 | <a href="#">KTLFCNASKewDNTTTECR</a> |
| 19.0  | 2361.0365 | 0.9922 | <a href="#">KTLFCNASKewDNTTTECR</a> |

**Mascot:** <http://www.matrixscience.com/>

# MATRIX SCIENCE Mascot Search Results

## Peptide View

MS/MS Fragmentation of **KTLFCNASKEWDNTTTECR**

Found in **E7EQT9** in **con\_Xuniprot\_HUMAN3**, E7EQT9\_HUMAN C4b-binding protein beta chain OS=Homo sapiens GN=C4BPB PE=2 SV=1

Match to Query 17895: 2362.033932 from(788.351920,3+) intensity(77596.1953) rtinseconds(1171) scans(2785) index(26539)

Title: 111019\_Est\_ML\_YS\_G\_09Spectrum2396\_scans\_\_2785

Data file C:\mascot\20140703\_Tmgf\_1D\CSV\_UseAnalysis\MasterCSV\All\_Glyco\mgf\ptm\UC18ERLIC\_PTMTM\_35D.mgf

Click mouse within plot area to zoom in by factor of two about that point

Or,  to  Da

Label all possible matches  Label matches used for scoring

Show Y-axis

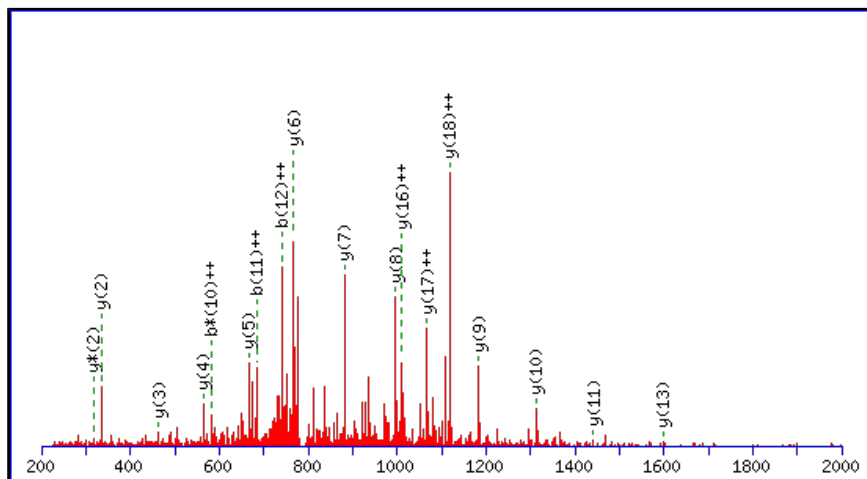

Monoisotopic mass of neutral peptide Mr(calc): 2361.0365

Fixed modifications: Carbamidomethyl (C) (apply to specified residues or termini only)

Variable modifications:

N13 : Deamidated (NQ)

Ions Score: 52 Expect: 0.00062

Matches : 18/210 fragment ions using 36 most intense peaks ([help](#))

| #  | b         | b <sup>++</sup> | b <sup>*</sup> | b <sup>*++</sup> | b <sup>0</sup> | b <sup>0++</sup> | Seq.     | y                | y <sup>++</sup>  | y <sup>*</sup>  | y <sup>*++</sup> | y <sup>0</sup> | y <sup>0++</sup> | #         |
|----|-----------|-----------------|----------------|------------------|----------------|------------------|----------|------------------|------------------|-----------------|------------------|----------------|------------------|-----------|
| 1  | 129.1022  | 65.0548         | 112.0757       | 56.5415          |                |                  | <b>K</b> |                  |                  |                 |                  |                |                  | <b>19</b> |
| 2  | 230.1499  | 115.5786        | 213.1234       | 107.0653         | 212.1394       | 106.5733         | <b>T</b> | 2233.9489        | <b>1117.4781</b> | 2216.9223       | 1108.9648        | 2215.9383      | 1108.4728        | <b>18</b> |
| 3  | 343.2340  | 172.1206        | 326.2074       | 163.6074         | 325.2234       | 163.1153         | <b>L</b> | 2132.9012        | <b>1066.9542</b> | 2115.8746       | 1058.4410        | 2114.8906      | 1057.9489        | <b>17</b> |
| 4  | 490.3024  | 245.6548        | 473.2758       | 237.1416         | 472.2918       | 236.6496         | <b>F</b> | 2019.8171        | <b>1010.4122</b> | 2002.7906       | 1001.8989        | 2001.8066      | 1001.4069        | <b>16</b> |
| 5  | 650.3330  | 325.6702        | 633.3065       | 317.1569         | 632.3225       | 316.6649         | <b>C</b> | 1872.7487        | 936.8780         | 1855.7222       | 928.3647         | 1854.7381      | 927.8727         | <b>15</b> |
| 6  | 764.3760  | 382.6916        | 747.3494       | 374.1783         | 746.3654       | 373.6863         | <b>N</b> | 1712.7181        | 856.8627         | 1695.6915       | 848.3494         | 1694.7075      | 847.8574         | <b>14</b> |
| 7  | 835.4131  | 418.2102        | 818.3865       | 409.6969         | 817.4025       | 409.2049         | <b>A</b> | <b>1598.6751</b> | 799.8412         | 1581.6486       | 791.3279         | 1580.6646      | 790.8359         | <b>13</b> |
| 8  | 922.4451  | 461.7262        | 905.4186       | 453.2129         | 904.4345       | 452.7209         | <b>S</b> | 1527.6380        | 764.3226         | 1510.6115       | 755.8094         | 1509.6274      | 755.3174         | <b>12</b> |
| 9  | 1050.5401 | 525.7737        | 1033.5135      | 517.2604         | 1032.5295      | 516.7684         | <b>K</b> | <b>1440.6060</b> | 720.8066         | 1423.5794       | 712.2934         | 1422.5954      | 711.8013         | <b>11</b> |
| 10 | 1179.5827 | 590.2950        | 1162.5561      | <b>581.7817</b>  | 1161.5721      | 581.2897         | <b>E</b> | <b>1312.5110</b> | 656.7591         | 1295.4845       | 648.2459         | 1294.5005      | 647.7539         | <b>10</b> |
| 11 | 1365.6620 | <b>683.3346</b> | 1348.6354      | 674.8214         | 1347.6514      | 674.3293         | <b>W</b> | <b>1183.4684</b> | 592.2379         | 1166.4419       | 583.7246         | 1165.4579      | 583.2326         | <b>9</b>  |
| 12 | 1480.6889 | <b>740.8481</b> | 1463.6624      | 732.3348         | 1462.6784      | 731.8428         | <b>D</b> | <b>997.3891</b>  | 499.1982         | 980.3626        | 490.6849         | 979.3786       | 490.1929         | <b>8</b>  |
| 13 | 1595.7159 | 798.3616        | 1578.6893      | 789.8483         | 1577.7053      | 789.3563         | <b>N</b> | <b>882.3622</b>  | 441.6847         | 865.3356        | 433.1715         | 864.3516       | 432.6794         | <b>7</b>  |
| 14 | 1696.7635 | 848.8854        | 1679.7370      | 840.3721         | 1678.7530      | 839.8801         | <b>T</b> | <b>767.3352</b>  | 384.1713         | 750.3087        | 375.6580         | 749.3247       | 375.1660         | <b>6</b>  |
| 15 | 1797.8112 | 899.4093        | 1780.7847      | 890.8960         | 1779.8007      | 890.4040         | <b>T</b> | <b>666.2876</b>  | 333.6474         | 649.2610        | 325.1341         | 648.2770       | 324.6421         | <b>5</b>  |
| 16 | 1898.8589 | 949.9331        | 1881.8324      | 941.4198         | 1880.8483      | 940.9278         | <b>T</b> | <b>565.2399</b>  | 283.1236         | 548.2133        | 274.6103         | 547.2293       | 274.1183         | <b>4</b>  |
| 17 | 2027.9015 | 1014.4544       | 2010.8750      | 1005.9411        | 2009.8909      | 1005.4491        | <b>E</b> | <b>464.1922</b>  | 232.5997         | 447.1656        | 224.0865         | 446.1816       | 223.5945         | <b>3</b>  |
| 18 | 2187.9321 | 1094.4697       | 2170.9056      | 1085.9564        | 2169.9216      | 1085.4644        | <b>C</b> | <b>335.1496</b>  | 168.0784         | <b>318.1231</b> | 159.5652         |                |                  | <b>2</b>  |
| 19 |           |                 |                |                  |                |                  | <b>R</b> | 175.1190         | 88.0631          | 158.0924        | 79.5498          |                |                  | <b>1</b>  |

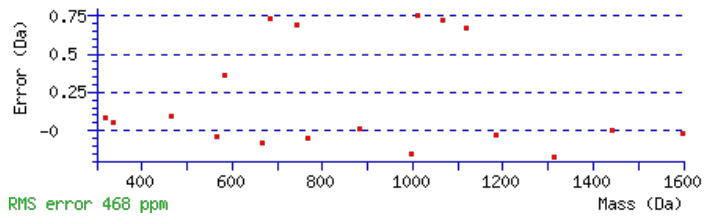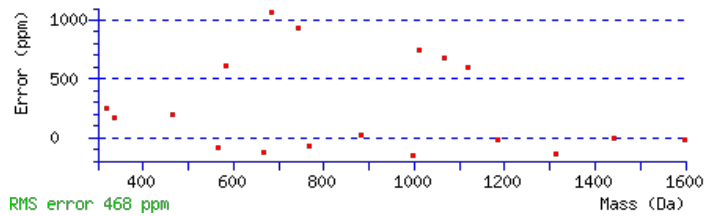

NCBI BLAST search of [KTLFCNASKEWDNTTTECR](#)

(Parameters: blastp, nr protein database, expect=20000, no filter, PAM30)

Other BLAST [web gateways](#)

All matches to this query

| Score | Mr(calc)  | Delta   | Sequence                            | Site Analysis         |
|-------|-----------|---------|-------------------------------------|-----------------------|
| 51.9  | 2361.0365 | 0.9974  | <a href="#">KTLFCNASKEWDNTTTECR</a> | Deamidated N13 99.83% |
| 24.2  | 2361.0365 | 0.9974  | <a href="#">KTLFCNASKEWDNTTTECR</a> | Deamidated N6 0.17%   |
| 0.7   | 2362.0457 | -0.0118 | <a href="#">EWVPESAPVLEQDPTRNMM</a> |                       |

Mascot: <http://www.matrixscience.com/>

# MASCOT SCIENCE Mascot Search Results

## Peptide View

MS/MS Fragmentation of **KTLCFNASK**

Found in **E7EQT9** in **con\_Xuniprot\_HUMAN3**, E7EQT9\_HUMAN C4b-binding protein beta chain OS=Homo sapiens  
GN=C4BPB PE=2 SV=1

Match to Query 209: 1068.528128 from(535.271340,2+) intensity(9511.8828) rtinseconds(348) scans(588) index(15570)

Title: 111019\_Est\_MI\_YP\_G\_05Spectrum471\_scans\_\_588

Data file C:\mascot\20140703\_Tmgf\_1D\CSV\_UseAnalysis\MasterCSV\All\_Glyco\mgf\ptm\UC18ERIC\_PTM\_35D.mgf

Click mouse within plot area to zoom in by factor of two about that point

Or, to Da

Label all possible matches Label matches used for scoring

Show Y-axis

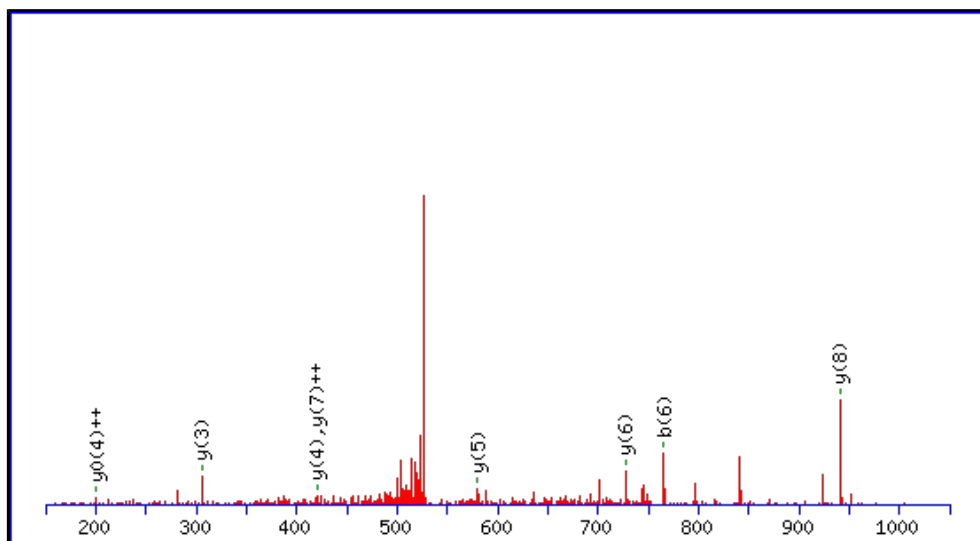

Monoisotopic mass of neutral peptide **Mr(calc)**: 1068.5274

**Fixed modifications:** Carbamidomethyl (C) (apply to specified residues or termini only)

**Variable modifications:**

N6 : Deamidated (NQ)

**Ions Score:** 39 **Expect:** 0.015

**Matches :** 8/92 fragment ions using 9 most intense peaks ([help](#))

| # | b        | b <sup>++</sup> | b*       | b <sup>+++</sup> | b <sup>0</sup> | b <sup>0++</sup> | Seq. | y        | y <sup>++</sup> | y*       | y <sup>+++</sup> | y <sup>0</sup> | y <sup>0++</sup> | # |
|---|----------|-----------------|----------|------------------|----------------|------------------|------|----------|-----------------|----------|------------------|----------------|------------------|---|
| 1 | 129.1022 | 65.0548         | 112.0757 | 56.5415          |                |                  | K    |          |                 |          |                  |                |                  | 9 |
| 2 | 230.1499 | 115.5786        | 213.1234 | 107.0653         | 212.1394       | 106.5733         | T    | 941.4397 | 471.2235        | 924.4131 | 462.7102         | 923.4291       | 462.2182         | 8 |
| 3 | 343.2340 | 172.1206        | 326.2074 | 163.6074         | 325.2234       | 163.1153         | L    | 840.3920 | 420.6996        | 823.3655 | 412.1864         | 822.3815       | 411.6944         | 7 |
| 4 | 490.3024 | 245.6548        | 473.2758 | 237.1416         | 472.2918       | 236.6496         | F    | 727.3080 | 364.1576        | 710.2814 | 355.6443         | 709.2974       | 355.1523         | 6 |
| 5 | 650.3330 | 325.6702        | 633.3065 | 317.1569         | 632.3225       | 316.6649         | C    | 580.2395 | 290.6234        | 563.2130 | 282.1101         | 562.2290       | 281.6181         | 5 |
| 6 | 765.3600 | 383.1836        | 748.3334 | 374.6704         | 747.3494       | 374.1783         | N    | 420.2089 | 210.6081        | 403.1823 | 202.0948         | 402.1983       | 201.6028         | 4 |
| 7 | 836.3971 | 418.7022        | 819.3706 | 410.1889         | 818.3865       | 409.6969         | A    | 305.1819 | 153.0946        | 288.1554 | 144.5813         | 287.1714       | 144.0893         | 3 |
| 8 | 923.4291 | 462.2182        | 906.4026 | 453.7049         | 905.4186       | 453.2129         | S    | 234.1448 | 117.5761        | 217.1183 | 109.0628         | 216.1343       | 108.5708         | 2 |
| 9 |          |                 |          |                  |                |                  | K    | 147.1128 | 74.0600         | 130.0863 | 65.5468          |                |                  | 1 |

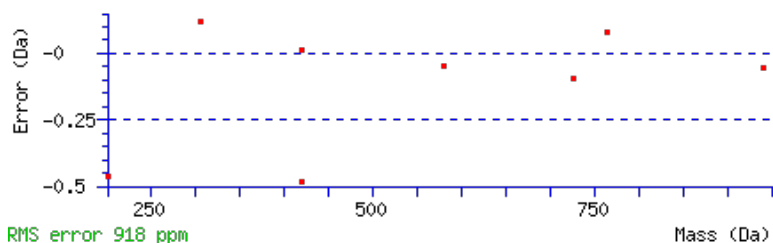

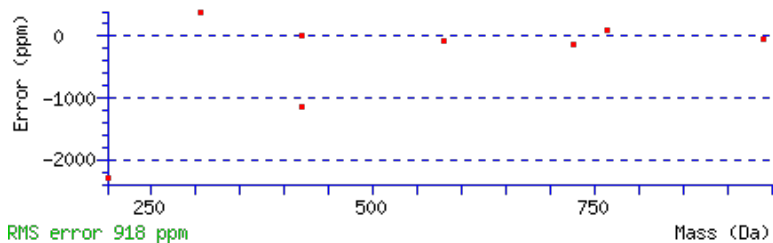

NCBI **BLAST** search of [KTLEFCNASK](#)

(Parameters: blastp, nr protein database, expect=20000, no filter, PAM30)

Other BLAST [web gateways](#)

**All matches to this query**

| Score | Mr(calc)  | Delta  | Sequence                   |
|-------|-----------|--------|----------------------------|
| 39.4  | 1068.5274 | 0.0008 | <a href="#">KTLEFCNASK</a> |
| 3.4   | 1066.5229 | 2.0052 | <a href="#">ARNMAVDYK</a>  |
| 1.1   | 1066.5229 | 2.0052 | <a href="#">LNLMQNYR</a>   |
| 0.4   | 1067.5247 | 1.0034 | <a href="#">YSLRQDGTK</a>  |
| 0.3   | 1066.5230 | 2.0051 | <a href="#">LEQVCSGTR</a>  |

Mascot: <http://www.matrixscience.com/>

# MATRIX SCIENCE Mascot Search Results

## Peptide View

MS/MS Fragmentation of **EWDNTTTECR**

Found in **E7EQT9** in **con\_Xuniprot\_HUMAN3**, E7EQT9\_HUMAN C4b-binding protein beta chain OS=Homo sapiens GN=C4BPB PE=2 SV=1

Match to Query 1963: 1311.507468 from(656.761010,2+) intensity(8613.1387) rtinseconds(350) scans(688) index(3643)

Title: 111019\_Est\_ISCardio\_NMI\_YP\_G\_6Spectrum571\_scans\_688

Data file C:\mascot\20140703\_Tmgf\_1D\CSV\_UseAnalysis\MasterCSV\All\_Glyco\mgf\ptm\UC18ERLIC\_PTM\_35D.mgf

Click mouse within plot area to zoom in by factor of two about that point

Or, to Da

Label all possible matches Label matches used for scoring

Show Y-axis

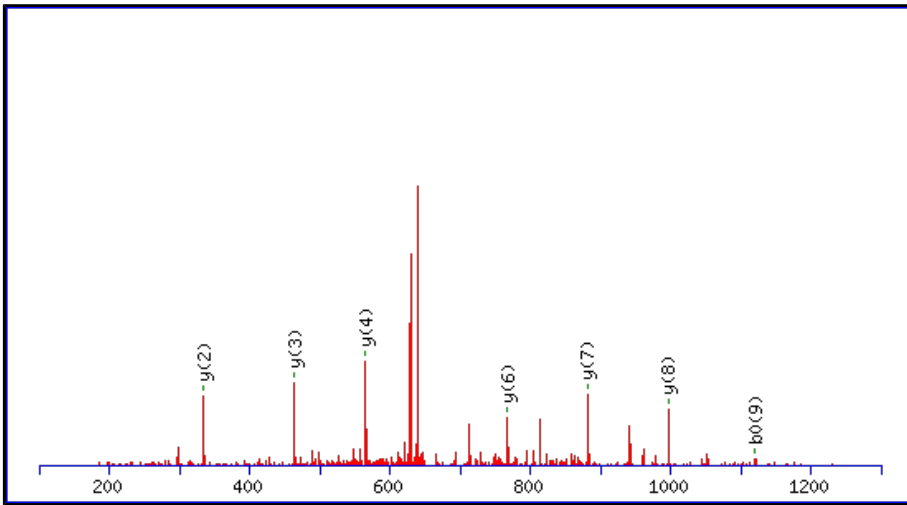

Monoisotopic mass of neutral peptide **Mr(calc)**: 1311.5037

Fixed modifications: Carbamidomethyl (C) (apply to specified residues or termini only)

Variable modifications:

N4 : Deamidated (NQ)

Ions Score: 36 Expect: 0.0035

Matches : 7/98 fragment ions using 11 most intense peaks ([help](#))

| #  | b         | b <sup>++</sup> | b <sup>*</sup> | b <sup>+++</sup> | b <sup>0</sup>   | b <sup>0++</sup> | Seq. | y               | y <sup>++</sup> | y <sup>*</sup> | y <sup>+++</sup> | y <sup>0</sup> | y <sup>0++</sup> | #  |
|----|-----------|-----------------|----------------|------------------|------------------|------------------|------|-----------------|-----------------|----------------|------------------|----------------|------------------|----|
| 1  | 130.0499  | 65.5286         |                |                  | 112.0393         | 56.5233          | E    |                 |                 |                |                  |                |                  | 10 |
| 2  | 316.1292  | 158.5682        |                |                  | 298.1186         | 149.5629         | W    | 1183.4684       | 592.2379        | 1166.4419      | 583.7246         | 1165.4579      | 583.2326         | 9  |
| 3  | 431.1561  | 216.0817        |                |                  | 413.1456         | 207.0764         | D    | <b>997.3891</b> | 499.1982        | 980.3626       | 490.6849         | 979.3786       | 490.1929         | 8  |
| 4  | 546.1831  | 273.5952        | 529.1565       | 265.0819         | 528.1725         | 264.5899         | N    | <b>882.3622</b> | 441.6847        | 865.3356       | 433.1715         | 864.3516       | 432.6794         | 7  |
| 5  | 647.2307  | 324.1190        | 630.2042       | 315.6057         | 629.2202         | 315.1137         | T    | <b>767.3352</b> | 384.1713        | 750.3087       | 375.6580         | 749.3247       | 375.1660         | 6  |
| 6  | 748.2784  | 374.6429        | 731.2519       | 366.1296         | 730.2679         | 365.6376         | T    | 666.2876        | 333.6474        | 649.2610       | 325.1341         | 648.2770       | 324.6421         | 5  |
| 7  | 849.3261  | 425.1667        | 832.2996       | 416.6534         | 831.3155         | 416.1614         | T    | <b>565.2399</b> | 283.1236        | 548.2133       | 274.6103         | 547.2293       | 274.1183         | 4  |
| 8  | 978.3687  | 489.6880        | 961.3421       | 481.1747         | 960.3581         | 480.6827         | E    | <b>464.1922</b> | 232.5997        | 447.1656       | 224.0865         | 446.1816       | 223.5945         | 3  |
| 9  | 1138.3993 | 569.7033        | 1121.3728      | 561.1900         | <b>1120.3888</b> | 560.6980         | C    | <b>335.1496</b> | 168.0784        | 318.1231       | 159.5652         |                |                  | 2  |
| 10 |           |                 |                |                  |                  |                  | R    | 175.1190        | 88.0631         | 158.0924       | 79.5498          |                |                  | 1  |

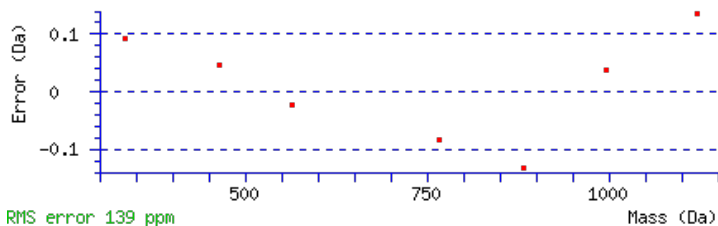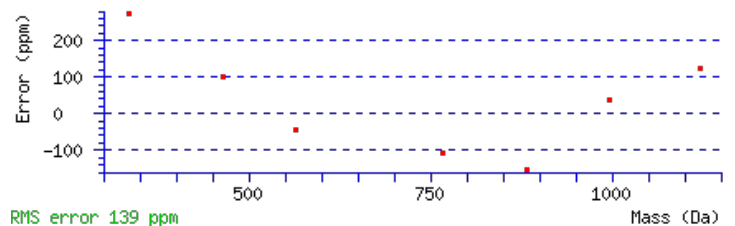

NCBI BLAST search of **EWDNTTTECR**

(Parameters: blastp, nr protein database, expect=20000, no filter, PAM30)

Other BLAST [web gateways](#)

**All matches to this query**

| Score | Mr(calc)  | Delta  | Sequence                     |
|-------|-----------|--------|------------------------------|
| 36.2  | 1311.5037 | 0.0037 | <a href="#">EWDNTTTECR</a>   |
| 3.7   | 1311.5037 | 0.0037 | <a href="#">AQSPNNTSCDAF</a> |

**Mascot:** <http://www.matrixscience.com/>



# MATRIX SCIENCE Mascot Search Results

## Peptide View

MS/MS Fragmentation of **EQFCPPPPQIPNAQNMTTTVNYQDGEK**

Found in **Q5VYL6** in **con\_Xuniprot\_HUMAN3**, Q5VYL6\_HUMAN Complement factor H-related protein 5 OS=Homo sapiens GN=CFHR5 PE=2 SV=1

Match to Query 27323: 3120.383832 from(1041.135220,3+) intensity(9938.5928) rtinseconds(1226) scans(2742) index(15081)

Title: 111019\_Est\_MI\_YP\_G\_04Spectrum2319\_scans\_2742

Data file C:\mascot\20140703\_Tmgf\_1D\CSV\_UseAnalysis\MasterCSV\All\_Glyco\mgf\ptm\UC18ERLIC\_PTM\_35D.mgf

Click mouse within plot area to zoom in by factor of two about that point

Or, to Da

Label all possible matches Label matches used for scoring

Show Y-axis

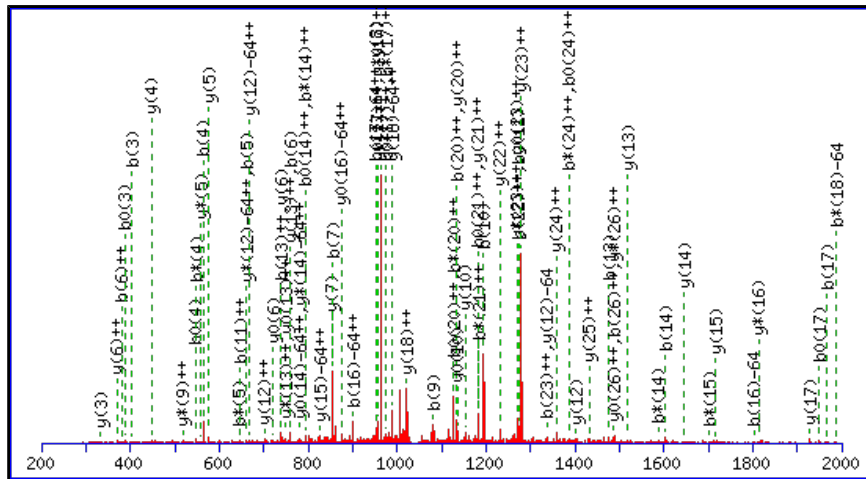

Monoisotopic mass of neutral peptide Mr(calc): 3120.3805

Fixed modifications: Carbamidomethyl (C) (apply to specified residues or termini only)

Variable modifications:

N15 : Deamidated (NQ)

M16 : Oxidation (M), with neutral losses 0.0000(shown in table), 63.9983

Ions Score: 50 Expect: 0.0011

Matches : 83/464 fragment ions using 153 most intense peaks ([help](#))

| #  | b         | b <sup>++</sup> | b <sup>*</sup> | b <sup>*++</sup> | b <sup>0</sup> | b <sup>0++</sup> | Seq. | y         | y <sup>++</sup> | y <sup>*</sup> | y <sup>*++</sup> | y <sup>0</sup> | y <sup>0++</sup> | #  |
|----|-----------|-----------------|----------------|------------------|----------------|------------------|------|-----------|-----------------|----------------|------------------|----------------|------------------|----|
| 1  | 130.0499  | 65.5286         |                |                  | 112.0393       | 56.5233          | E    |           |                 |                |                  |                |                  | 27 |
| 2  | 258.1084  | 129.5579        | 241.0819       | 121.0446         | 240.0979       | 120.5526         | Q    | 2992.3452 | 1496.6762       | 2975.3186      | 1488.1629        | 2974.3346      | 1487.6709        | 26 |
| 3  | 405.1769  | 203.0921        | 388.1503       | 194.5788         | 387.1663       | 194.0868         | F    | 2864.2866 | 1432.6469       | 2847.2600      | 1424.1337        | 2846.2760      | 1423.6416        | 25 |
| 4  | 565.2075  | 283.1074        | 548.1810       | 274.5941         | 547.1969       | 274.1021         | C    | 2717.2182 | 1359.1127       | 2700.1916      | 1350.5994        | 2699.2076      | 1350.1074        | 24 |
| 5  | 662.2603  | 331.6338        | 645.2337       | 323.1205         | 644.2497       | 322.6285         | P    | 2557.1875 | 1279.0974       | 2540.1610      | 1270.5841        | 2539.1769      | 1270.0921        | 23 |
| 6  | 759.3130  | 380.1602        | 742.2865       | 371.6469         | 741.3025       | 371.1549         | P    | 2460.1347 | 1230.5710       | 2443.1082      | 1222.0577        | 2442.1242      | 1221.5657        | 22 |
| 7  | 856.3658  | 428.6865        | 839.3393       | 420.1733         | 838.3552       | 419.6813         | P    | 2363.0820 | 1182.0446       | 2346.0554      | 1173.5314        | 2345.0714      | 1173.0393        | 21 |
| 8  | 953.4186  | 477.2129        | 936.3920       | 468.6996         | 935.4080       | 468.2076         | P    | 2266.0292 | 1133.5182       | 2249.0027      | 1125.0050        | 2248.0187      | 1124.5130        | 20 |
| 9  | 1081.4771 | 541.2422        | 1064.4506      | 532.7289         | 1063.4666      | 532.2369         | Q    | 2168.9765 | 1084.9919       | 2151.9499      | 1076.4786        | 2150.9659      | 1075.9866        | 19 |
| 10 | 1194.5612 | 597.7842        | 1177.5347      | 589.2710         | 1176.5506      | 588.7790         | I    | 2040.9179 | 1020.9626       | 2023.8913      | 1012.4493        | 2022.9073      | 1011.9573        | 18 |
| 11 | 1291.6140 | 646.3106        | 1274.5874      | 637.7973         | 1273.6034      | 637.3053         | P    | 1927.8338 | 964.4205        | 1910.8073      | 955.9073         | 1909.8232      | 955.4153         | 17 |
| 12 | 1405.6569 | 703.3321        | 1388.6304      | 694.8188         | 1387.6463      | 694.3268         | N    | 1830.7811 | 915.8942        | 1813.7545      | 907.3809         | 1812.7705      | 906.8889         | 16 |
| 13 | 1476.6940 | 738.8506        | 1459.6675      | 730.3374         | 1458.6834      | 729.8454         | A    | 1716.7381 | 858.8727        | 1699.7116      | 850.3594         | 1698.7276      | 849.8674         | 15 |
| 14 | 1604.7526 | 802.8799        | 1587.7260      | 794.3667         | 1586.7420      | 793.8747         | Q    | 1645.7010 | 823.3541        | 1628.6745      | 814.8409         | 1627.6904      | 814.3489         | 14 |
| 15 | 1719.7795 | 860.3934        | 1702.7530      | 851.8801         | 1701.7690      | 851.3881         | N    | 1517.6424 | 759.3249        | 1500.6159      | 750.8116         | 1499.6319      | 750.3196         | 13 |
| 16 | 1866.8149 | 933.9111        | 1849.7884      | 925.3978         | 1848.8044      | 924.9058         | M    | 1402.6155 | 701.8114        | 1385.5889      | 693.2981         | 1384.6049      | 692.8061         | 12 |
| 17 | 1967.8626 | 984.4349        | 1950.8361      | 975.9217         | 1949.8520      | 975.4297         | T    | 1255.5801 | 628.2937        | 1238.5535      | 619.7804         | 1237.5695      | 619.2884         | 11 |
| 18 | 2068.9103 | 1034.9588       | 2051.8837      | 1026.4455        | 2050.8997      | 1025.9535        | T    | 1154.5324 | 577.7698        | 1137.5059      | 569.2566         | 1136.5218      | 568.7646         | 10 |
| 19 | 2169.9580 | 1085.4826       | 2152.9314      | 1076.9693        | 2151.9474      | 1076.4773        | T    | 1053.4847 | 527.2460        | 1036.4582      | 518.7327         | 1035.4742      | 518.2407         | 9  |
| 20 | 2269.0264 | 1135.0168       | 2251.9998      | 1126.5036        | 2251.0158      | 1126.0115        | V    | 952.4371  | 476.7222        | 935.4105       | 468.2089         | 934.4265       | 467.7169         | 8  |
| 21 | 2383.0693 | 1192.0383       | 2366.0428      | 1183.5250        | 2365.0587      | 1183.0330        | N    | 853.3686  | 427.1880        | 836.3421       | 418.6747         | 835.3581       | 418.1827         | 7  |

|    |           |                  |           |                  |           |                  |   |                 |                 |                 |          |                 |          |   |
|----|-----------|------------------|-----------|------------------|-----------|------------------|---|-----------------|-----------------|-----------------|----------|-----------------|----------|---|
| 22 | 2546.1326 | <b>1273.5700</b> | 2529.1061 | 1265.0567        | 2528.1221 | 1264.5647        | Y | <b>739.3257</b> | <b>370.1665</b> | 722.2992        | 361.6532 | <b>721.3151</b> | 361.1612 | 6 |
| 23 | 2674.1912 | <b>1337.5992</b> | 2657.1647 | 1329.0860        | 2656.1807 | 1328.5940        | Q | <b>576.2624</b> | 288.6348        | <b>559.2358</b> | 280.1216 | 558.2518        | 279.6295 | 5 |
| 24 | 2789.2182 | 1395.1127        | 2772.1916 | <b>1386.5994</b> | 2771.2076 | <b>1386.1074</b> | D | <b>448.2038</b> | 224.6055        | 431.1773        | 216.0923 | 430.1932        | 215.6003 | 4 |
| 25 | 2846.2396 | 1423.6235        | 2829.2131 | 1415.1102        | 2828.2291 | 1414.6182        | G | <b>333.1769</b> | 167.0921        | 316.1503        | 158.5788 | 315.1663        | 158.0868 | 3 |
| 26 | 2975.2822 | <b>1488.1447</b> | 2958.2557 | 1479.6315        | 2957.2717 | 1479.1395        | E | 276.1554        | 138.5813        | 259.1288        | 130.0681 | 258.1448        | 129.5761 | 2 |
| 27 |           |                  |           |                  |           |                  | K | 147.1128        | 74.0600         | 130.0863        | 65.5468  |                 |          | 1 |

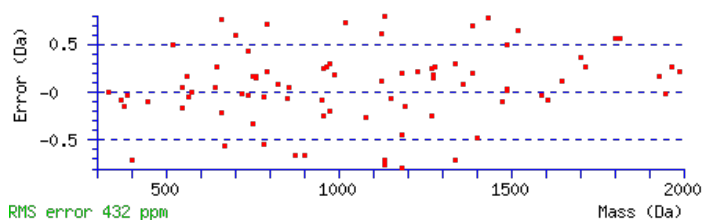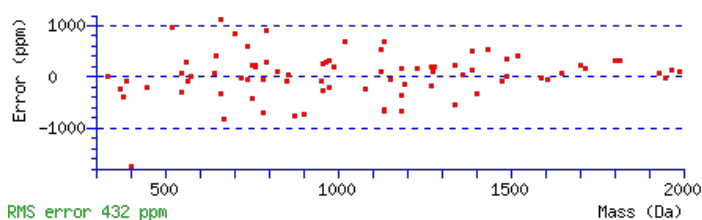

NCBI BLAST search of [EQFCPPPPQIPNAQNMTTTVNYQDGEK](#)

(Parameters: blastp, nr protein database, expect=20000, no filter, PAM30)

Other BLAST [web gateways](#)

All matches to this query

| Score | Mr(calc)  | Delta  | Sequence                                     | Site Analysis         |
|-------|-----------|--------|----------------------------------------------|-----------------------|
| 50.2  | 3120.3805 | 0.0034 | <a href="#">EQFCPPPPQIPNAQNMTTTVNYQDGEK</a>  | Deamidated N15 56.92% |
| 47.8  | 3120.3805 | 0.0034 | <a href="#">EQFCPPPPQIPNAQNMTTTVNYQDGEK</a>  | Deamidated Q14 32.60% |
| 37.5  | 3120.3805 | 0.0034 | <a href="#">EQFCPPPPQIPNAQNMTTTVNYQDGEK</a>  | Deamidated N12 3.08%  |
| 36.8  | 3120.3805 | 0.0034 | <a href="#">EQFCPPPPQIPNAQNMTTTVNYQDGEK</a>  | Deamidated N21 2.61%  |
| 35.6  | 3120.3805 | 0.0034 | <a href="#">EQFCPPPPQIPNAQNMTTTVNYQDGEK</a>  | Deamidated Q9 1.99%   |
| 34.5  | 3120.3805 | 0.0034 | <a href="#">EQFCPPPPQIPNAQNMTTTVNYQDGEK</a>  | Deamidated Q2 1.52%   |
| 33.7  | 3120.3805 | 0.0034 | <a href="#">EQFCPPPPQIPNAQNMTTTVNYQDGEK</a>  | Deamidated Q23 1.27%  |
| 2.7   | 3118.3716 | 2.0123 | <a href="#">LMSANASDLPLSIECFMNDVDVSGTMNR</a> |                       |
| 2.3   | 3120.3830 | 0.0009 | <a href="#">QGVNVSANQDDEL DHETFLMQIDQETK</a> |                       |
| 2.3   | 3120.3830 | 0.0009 | <a href="#">QGVNVSANQDDEL DHETFLMQIDQETK</a> |                       |

Mascot: <http://www.matrixscience.com/>

# MASCOT SCIENCE Mascot Search Results

## Peptide View

MS/MS Fragmentation of **SLPNFPNTSATANATGGR**

Found in **Q6UXB8** in **con\_Xuniprot\_HUMAN3**, PI16\_HUMAN Peptidase inhibitor 16 OS=Homo sapiens GN=PI16 PE=1 SV=1

Match to Query 10055: 1776.832788 from(889.423670,2+) intensity(57619.4766) rtinseconds(1074) scans(2384) index(13172)

Title: 111019\_Est\_ISCardio\_NMI\_YS\_G\_11Spectrum2059\_scans\_\_2384

Data file C:\\mascot\\20140703\_Tmgf\_1D\\CSV\_UseAnalysis\\MasterCSV\\All\_Glyco\\mgf\\ptm\\UC18ERLIC\_PTM\_35D.mgf

Click mouse within plot area to zoom in by factor of two about that point

Or, to Da

Label all possible matches Label matches used for scoring

Show Y-axis

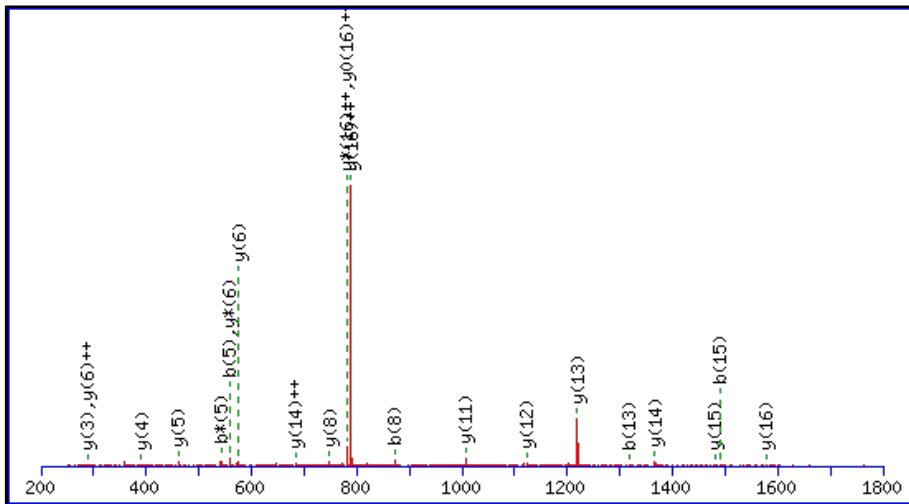

Monoisotopic mass of neutral peptide Mr(calc): 1776.8278

Fixed modifications: Carbamidomethyl (C) (apply to specified residues or termini only)

Variable modifications:

N7 : Deamidated (NQ)

N13 : Deamidated (NQ)

Ions Score: 85 Expect: 6.1e-007

Matches : 22/192 fragment ions using 30 most intense peaks ([help](#))

| #  | b                | b <sup>++</sup> | b <sup>*</sup>  | b <sup>*++</sup> | b <sup>0</sup> | b <sup>0++</sup> | Seq. | y                | y <sup>++</sup> | y <sup>*</sup>  | y <sup>*++</sup> | y <sup>0</sup> | y <sup>0++</sup> | #  |
|----|------------------|-----------------|-----------------|------------------|----------------|------------------|------|------------------|-----------------|-----------------|------------------|----------------|------------------|----|
| 1  | 88.0393          | 44.5233         |                 |                  | 70.0287        | 35.5180          | S    |                  |                 |                 |                  |                |                  | 18 |
| 2  | 201.1234         | 101.0653        |                 |                  | 183.1128       | 92.0600          | L    | 1690.8031        | 845.9052        | 1673.7766       | 837.3919         | 1672.7925      | 836.8999         | 17 |
| 3  | 298.1761         | 149.5917        |                 |                  | 280.1656       | 140.5864         | P    | <b>1577.7190</b> | <b>789.3632</b> | 1560.6925       | <b>780.8499</b>  | 1559.7085      | <b>780.3579</b>  | 16 |
| 4  | 412.2191         | 206.6132        | 395.1925        | 198.0999         | 394.2085       | 197.6079         | N    | <b>1480.6663</b> | 740.8368        | 1463.6397       | 732.3235         | 1462.6557      | 731.8315         | 15 |
| 5  | <b>559.2875</b>  | 280.1474        | <b>542.2609</b> | 271.6341         | 541.2769       | 271.1421         | F    | <b>1366.6234</b> | <b>683.8153</b> | 1349.5968       | 675.3020         | 1348.6128      | 674.8100         | 14 |
| 6  | 656.3402         | 328.6738        | 639.3137        | 320.1605         | 638.3297       | 319.6685         | P    | <b>1219.5549</b> | 610.2811        | 1202.5284       | 601.7678         | 1201.5444      | 601.2758         | 13 |
| 7  | 771.3672         | 386.1872        | 754.3406        | 377.6740         | 753.3566       | 377.1819         | N    | <b>1122.5022</b> | 561.7547        | 1105.4756       | 553.2414         | 1104.4916      | 552.7494         | 12 |
| 8  | <b>872.4149</b>  | 436.7111        | 855.3883        | 428.1978         | 854.4043       | 427.7058         | T    | <b>1007.4752</b> | 504.2413        | 990.4487        | 495.7280         | 989.4647       | 495.2360         | 11 |
| 9  | 959.4469         | 480.2271        | 942.4203        | 471.7138         | 941.4363       | 471.2218         | S    | 906.4276         | 453.7174        | 889.4010        | 445.2041         | 888.4170       | 444.7121         | 10 |
| 10 | 1030.4840        | 515.7456        | 1013.4575       | 507.2324         | 1012.4734      | 506.7404         | A    | 819.3955         | 410.2014        | 802.3690        | 401.6881         | 801.3850       | 401.1961         | 9  |
| 11 | 1131.5317        | 566.2695        | 1114.5051       | 557.7562         | 1113.5211      | 557.2642         | T    | <b>748.3584</b>  | 374.6828        | 731.3319        | 366.1696         | 730.3478       | 365.6776         | 8  |
| 12 | 1202.5688        | 601.7880        | 1185.5422       | 593.2748         | 1184.5582      | 592.7828         | A    | 647.3107         | 324.1590        | 630.2842        | 315.6457         | 629.3002       | 315.1537         | 7  |
| 13 | <b>1317.5957</b> | 659.3015        | 1300.5692       | 650.7882         | 1299.5852      | 650.2962         | N    | <b>576.2736</b>  | <b>288.6404</b> | <b>559.2471</b> | 280.1272         | 558.2631       | 279.6352         | 6  |
| 14 | 1388.6329        | 694.8201        | 1371.6063       | 686.3068         | 1370.6223      | 685.8148         | A    | <b>461.2467</b>  | 231.1270        | 444.2201        | 222.6137         | 443.2361       | 222.1217         | 5  |
| 15 | <b>1489.6805</b> | 745.3439        | 1472.6540       | 736.8306         | 1471.6700      | 736.3386         | T    | <b>390.2096</b>  | 195.6084        | 373.1830        | 187.0951         | 372.1990       | 186.6031         | 4  |
| 16 | 1546.7020        | 773.8546        | 1529.6754       | 765.3414         | 1528.6914      | 764.8494         | G    | <b>289.1619</b>  | 145.0846        | 272.1353        | 136.5713         |                |                  | 3  |
| 17 | 1603.7235        | 802.3654        | 1586.6969       | 793.8521         | 1585.7129      | 793.3601         | G    | 232.1404         | 116.5738        | 215.1139        | 108.0606         |                |                  | 2  |
| 18 |                  |                 |                 |                  |                |                  | R    | 175.1190         | 88.0631         | 158.0924        | 79.5498          |                |                  | 1  |

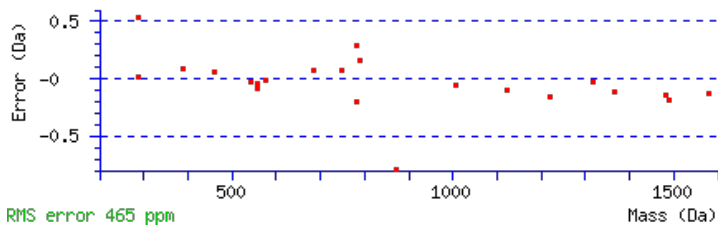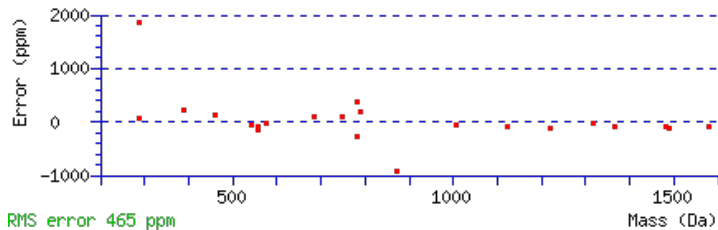

NCBI **BLAST** search of [SLPNFPNTSATANATGGR](#)

(Parameters: blastp, nr protein database, expect=20000, no filter, PAM30)

Other BLAST [web gateways](#)

**All matches to this query**

| Score | Mr(calc)  | Delta   | Sequence                           | Site Analysis             |
|-------|-----------|---------|------------------------------------|---------------------------|
| 85.1  | 1776.8278 | 0.0050  | <a href="#">SLPNFPNTSATANATGGR</a> | Deamidated N7, N13 99.99% |
| 46.7  | 1776.8278 | 0.0050  | <a href="#">SLPNFPNTSATANATGGR</a> | Deamidated N4, N13 0.01%  |
| 15.2  | 1776.8278 | 0.0050  | <a href="#">SLPNFPNTSATANATGGR</a> | Deamidated N4, N7 0.00%   |
| 9.3   | 1776.8377 | -0.0049 | <a href="#">QASQKQPSVTGSKEGDK</a>  |                           |
| 8.2   | 1776.8240 | 0.0088  | <a href="#">QLVQKSYSTDEMNTV</a>    |                           |
| 4.5   | 1775.8261 | 1.0067  | <a href="#">KSHCFDRGSLQDIDV</a>    |                           |
| 4.3   | 1776.8274 | 0.0054  | <a href="#">AMHLSQLDMILDQTK</a>    |                           |
| 3.2   | 1776.8326 | 0.0002  | <a href="#">LSNSKQHHPGLQCDR</a>    |                           |
| 3.2   | 1776.8326 | 0.0002  | <a href="#">LSNSKQHHPGLQCDR</a>    |                           |
| 3.0   | 1776.8325 | 0.0003  | <a href="#">EAPLRHSESAEMHAGR</a>   |                           |

Mascot: <http://www.matrixscience.com/>

# MATRIX SCIENCE Mascot Search Results

## Peptide View

MS/MS Fragmentation of **ALLTNVSSVALGSR**

Found in **Q7Z7M0** in **con\_Xuniprot\_HUMAN3**, MEGF8\_HUMAN Multiple epidermal growth factor-like domains protein 8 OS=Homo sapiens GN=MEGF8 PE=1 SV=2

Match to Query 2398: 1387.770848 from(694.892700,2+) intensity(33726.1875) rtinseconds(1537) scans(3912) index(18570)

Title: 111019\_Est\_MI\_YP\_G\_08Spectrum3402\_scans\_3912

Data file C:\mascot\20140703\_Tmgf\_1D\CSV\_UseAnalysis\MasterCSV\All\_Glyco\mgf\ptm\UC18ERLIC\_PTM\_35D.mgf

Click mouse within plot area to zoom in by factor of two about that point

Or, to Da

Label all possible matches Label matches used for scoring

Show Y-axis

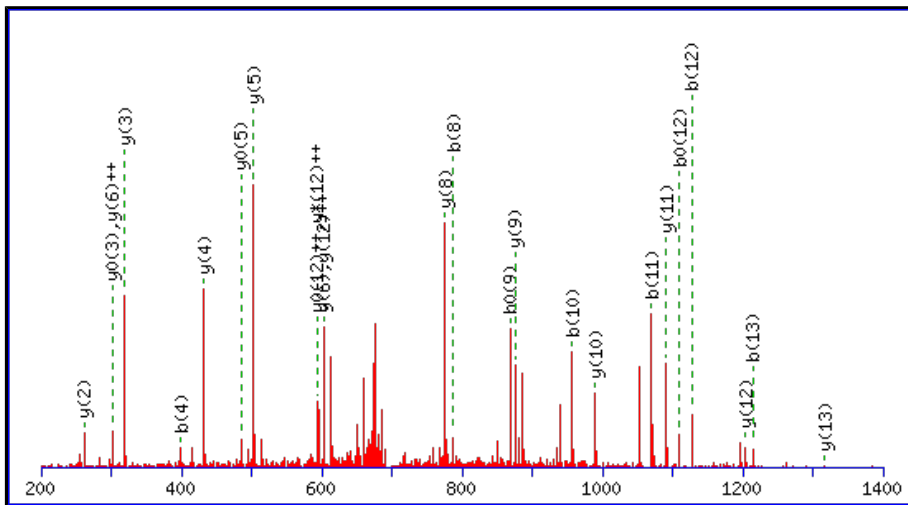

Monoisotopic mass of neutral peptide Mr(calc): 1387.7671

Fixed modifications: Carbamidomethyl (C) (apply to specified residues or termini only)

Variable modifications:

N5 : Deamidated (NQ)

Ions Score: 120 Expect: 1.6e-010

Matches : 25/140 fragment ions using 24 most intense peaks ([help](#))

| #  | b                | b <sup>++</sup> | b*        | b <sup>+++</sup> | b <sup>0</sup>   | b <sup>0++</sup> | Seq. | y                | y <sup>++</sup> | y*        | y <sup>+++</sup> | y <sup>0</sup>  | y <sup>0++</sup> | #  |
|----|------------------|-----------------|-----------|------------------|------------------|------------------|------|------------------|-----------------|-----------|------------------|-----------------|------------------|----|
| 1  | 72.0444          | 36.5258         |           |                  |                  |                  | A    |                  |                 |           |                  |                 |                  | 14 |
| 2  | 185.1285         | 93.0679         |           |                  |                  |                  | L    | <b>1317.7373</b> | 659.3723        | 1300.7107 | 650.8590         | 1299.7267       | 650.3670         | 13 |
| 3  | 298.2125         | 149.6099        |           |                  |                  |                  | L    | <b>1204.6532</b> | <b>602.8302</b> | 1187.6266 | <b>594.3170</b>  | 1186.6426       | <b>593.8250</b>  | 12 |
| 4  | <b>399.2602</b>  | 200.1337        |           |                  | 381.2496         | 191.1285         | T    | <b>1091.5691</b> | 546.2882        | 1074.5426 | 537.7749         | 1073.5586       | 537.2829         | 11 |
| 5  | 514.2871         | 257.6472        | 497.2606  | 249.1339         | 496.2766         | 248.6419         | N    | <b>990.5214</b>  | 495.7644        | 973.4949  | 487.2511         | 972.5109        | 486.7591         | 10 |
| 6  | 613.3556         | 307.1814        | 596.3290  | 298.6681         | 595.3450         | 298.1761         | V    | <b>875.4945</b>  | 438.2509        | 858.4680  | 429.7376         | 857.4839        | 429.2456         | 9  |
| 7  | 700.3876         | 350.6974        | 683.3610  | 342.1842         | 682.3770         | 341.6921         | S    | <b>776.4261</b>  | 388.7167        | 759.3995  | 380.2034         | 758.4155        | 379.7114         | 8  |
| 8  | <b>787.4196</b>  | 394.2134        | 770.3931  | 385.7002         | 769.4090         | 385.2082         | S    | 689.3941         | 345.2007        | 672.3675  | 336.6874         | 671.3835        | 336.1954         | 7  |
| 9  | 886.4880         | 443.7476        | 869.4615  | 435.2344         | <b>868.4775</b>  | 434.7424         | V    | <b>602.3620</b>  | <b>301.6847</b> | 585.3355  | 293.1714         | 584.3515        | 292.6794         | 6  |
| 10 | <b>957.5251</b>  | 479.2662        | 940.4986  | 470.7529         | 939.5146         | 470.2609         | A    | <b>503.2936</b>  | 252.1504        | 486.2671  | 243.6372         | <b>485.2831</b> | 243.1452         | 5  |
| 11 | <b>1070.6092</b> | 535.8082        | 1053.5827 | 527.2950         | 1052.5986        | 526.8030         | L    | <b>432.2565</b>  | 216.6319        | 415.2300  | 208.1186         | 414.2459        | 207.6266         | 4  |
| 12 | <b>1127.6307</b> | 564.3190        | 1110.6041 | 555.8057         | <b>1109.6201</b> | 555.3137         | G    | <b>319.1724</b>  | 160.0899        | 302.1459  | 151.5766         | <b>301.1619</b> | 151.0846         | 3  |
| 13 | <b>1214.6627</b> | 607.8350        | 1197.6361 | 599.3217         | 1196.6521        | 598.8297         | S    | <b>262.1510</b>  | 131.5791        | 245.1244  | 123.0659         | 244.1404        | 122.5738         | 2  |
| 14 |                  |                 |           |                  |                  |                  | R    | 175.1190         | 88.0631         | 158.0924  | 79.5498          |                 |                  | 1  |

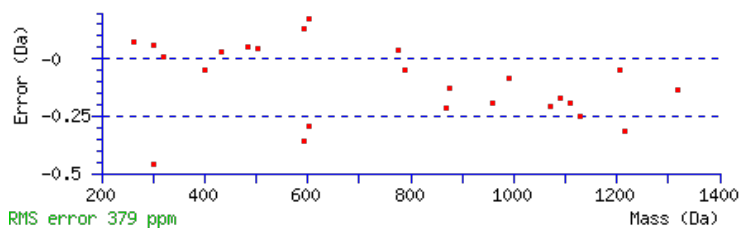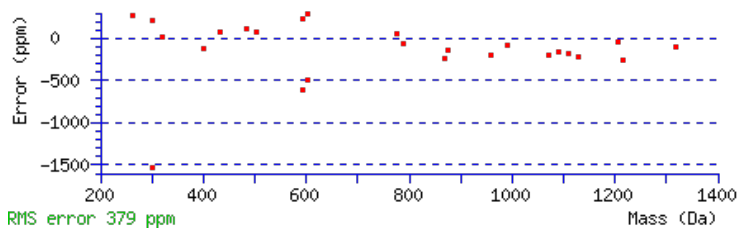

NCBI BLAST search of [ALLTNVSSVALGSR](#)

(Parameters: blastp, nr protein database, expect=20000, no filter, PAM30)

Other BLAST [web gateways](#)

**All matches to this query**

| Score | Mr(calc)  | Delta   | Sequence                        |
|-------|-----------|---------|---------------------------------|
| 120.0 | 1387.7671 | 0.0038  | <a href="#">ALLTNVSSVALGSR</a>  |
| 12.3  | 1387.7671 | 0.0038  | <a href="#">SSSVAALLGSVIER</a>  |
| 7.1   | 1386.7718 | 0.9990  | <a href="#">KAPSSLTPGSTLK</a>   |
| 7.0   | 1387.7684 | 0.0025  | <a href="#">ALLNNSGPRYKR</a>    |
| 6.5   | 1385.7626 | 2.0082  | <a href="#">IERLATRNIGDK</a>    |
| 4.2   | 1386.7653 | 1.0056  | <a href="#">LRQSLVMLQGNK</a>    |
| 4.0   | 1386.7732 | 0.9977  | <a href="#">AGPAAVPLAHGLASR</a> |
| 3.7   | 1386.7718 | 0.9990  | <a href="#">PSLVNASISSSVVK</a>  |
| 3.5   | 1386.7619 | 1.0089  | <a href="#">LFDGPOLLARTR</a>    |
| 1.5   | 1387.7724 | -0.0016 | <a href="#">SHLPYRIALYR</a>     |

Mascot: <http://www.matrixscience.com/>

# MATRIX SCIENCE Mascot Search Results

## Peptide View

MS/MS Fragmentation of **ANEQVVQSLNQTYK**

Found in **E9PBS6** in **con\_Xuniprot\_HUMAN3**, E9PBS6\_HUMAN Probable G-protein-coupled receptor 116 OS=Homo sapiens  
GN=GPR116 PE=2 SV=1

Match to Query 7716: 1621.799208 from(811.906880,2+) intensity(2184.0955) rtinseconds(981) scans(1597) index(7811)

Title: 111019\_Est\_ISCardio\_NMI\_YP\_G\_14Spectrum1271\_scans\_1597

Data file C:\\mascot\\20140703\_Tmgf\_1D\\CSV\_UseAnalysis\\MasterCSV\\All\_Glyco\\mgf\\ptm\\UC18ERLIC\_PTM\_35D.mgf

Click mouse within plot area to zoom in by factor of two about that point

Or, to Da

Label all possible matches Label matches used for scoring

Show Y-axis

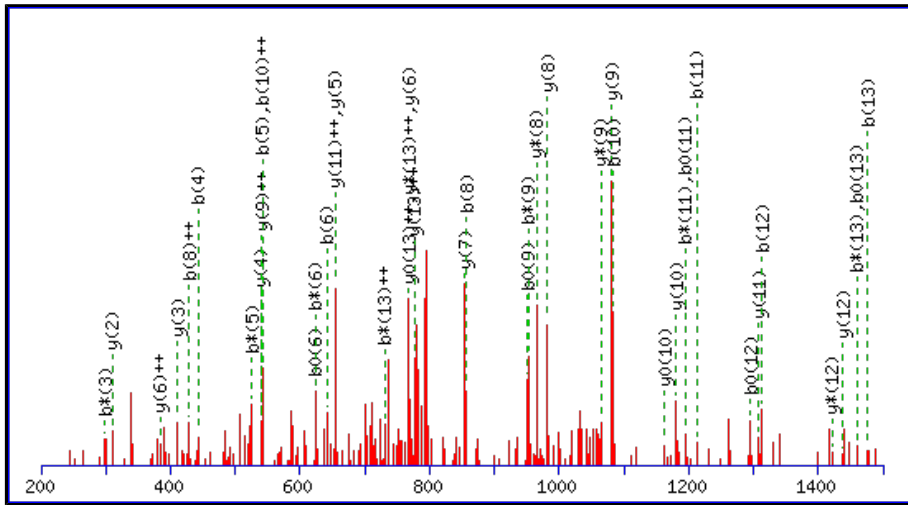

Monoisotopic mass of neutral peptide  $M_r(\text{calc})$ : 1621.7947

Fixed modifications: Carbamidomethyl (C) (apply to specified residues or termini only)

Variable modifications:

N10 : Deamidated (NQ)

Ions Score: 60 Expect: 0.00023

Matches : 43/146 fragment ions using 77 most intense peaks ([help](#))

| #  | b         | b <sup>++</sup> | b <sup>*</sup> | b <sup>*++</sup> | b <sup>0</sup> | b <sup>0++</sup> | Seq. | y         | y <sup>++</sup> | y <sup>*</sup> | y <sup>*++</sup> | y <sup>0</sup> | y <sup>0++</sup> | #  |
|----|-----------|-----------------|----------------|------------------|----------------|------------------|------|-----------|-----------------|----------------|------------------|----------------|------------------|----|
| 1  | 72.0444   | 36.5258         |                |                  |                |                  | A    |           |                 |                |                  |                |                  | 14 |
| 2  | 186.0873  | 93.5473         | 169.0608       | 85.0340          |                |                  | N    | 1551.7649 | 776.3861        | 1534.7384      | 767.8728         | 1533.7544      | 767.3808         | 13 |
| 3  | 315.1299  | 158.0686        | 298.1034       | 149.5553         | 297.1193       | 149.0633         | E    | 1437.7220 | 719.3646        | 1420.6955      | 710.8514         | 1419.7114      | 710.3594         | 12 |
| 4  | 443.1885  | 222.0979        | 426.1619       | 213.5846         | 425.1779       | 213.0926         | Q    | 1308.6794 | 654.8433        | 1291.6529      | 646.3301         | 1290.6688      | 645.8381         | 11 |
| 5  | 542.2569  | 271.6321        | 525.2304       | 263.1188         | 524.2463       | 262.6268         | V    | 1180.6208 | 590.8141        | 1163.5943      | 582.3008         | 1162.6103      | 581.8088         | 10 |
| 6  | 641.3253  | 321.1663        | 624.2988       | 312.6530         | 623.3148       | 312.1610         | V    | 1081.5524 | 541.2798        | 1064.5259      | 532.7666         | 1063.5419      | 532.2746         | 9  |
| 7  | 769.3839  | 385.1956        | 752.3573       | 376.6823         | 751.3733       | 376.1903         | Q    | 982.4840  | 491.7456        | 965.4575       | 483.2324         | 964.4734       | 482.7404         | 8  |
| 8  | 856.4159  | 428.7116        | 839.3894       | 420.1983         | 838.4054       | 419.7063         | S    | 854.4254  | 427.7164        | 837.3989       | 419.2031         | 836.4149       | 418.7111         | 7  |
| 9  | 969.5000  | 485.2536        | 952.4734       | 476.7404         | 951.4894       | 476.2483         | L    | 767.3934  | 384.2003        | 750.3668       | 375.6871         | 749.3828       | 375.1951         | 6  |
| 10 | 1084.5269 | 542.7671        | 1067.5004      | 534.2538         | 1066.5164      | 533.7618         | N    | 654.3093  | 327.6583        | 637.2828       | 319.1450         | 636.2988       | 318.6530         | 5  |
| 11 | 1212.5855 | 606.7964        | 1195.5590      | 598.2831         | 1194.5749      | 597.7911         | Q    | 539.2824  | 270.1448        | 522.2558       | 261.6316         | 521.2718       | 261.1396         | 4  |
| 12 | 1313.6332 | 657.3202        | 1296.6066      | 648.8070         | 1295.6226      | 648.3149         | T    | 411.2238  | 206.1155        | 394.1973       | 197.6023         | 393.2132       | 197.1103         | 3  |
| 13 | 1476.6965 | 738.8519        | 1459.6700      | 730.3386         | 1458.6860      | 729.8466         | Y    | 310.1761  | 155.5917        | 293.1496       | 147.0784         |                |                  | 2  |
| 14 |           |                 |                |                  |                |                  | K    | 147.1128  | 74.0600         | 130.0863       | 65.5468          |                |                  | 1  |



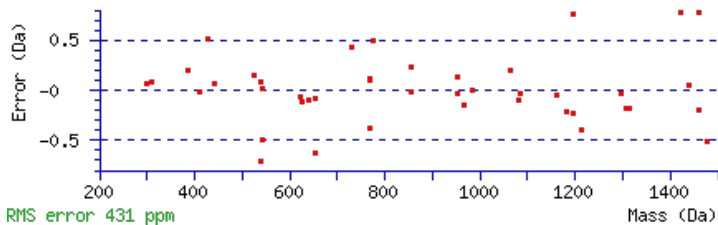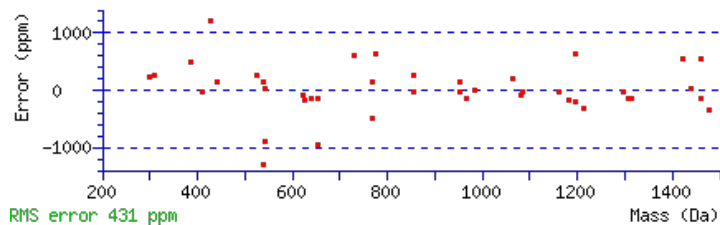

NCBI BLAST search of [ANEQVVQSLNQTYK](#)

(Parameters: blastp, nr protein database, expect=20000, no filter, PAM30)

Other BLAST [web gateways](#)

All matches to this query

| Score | Mr(calc)  | Delta   | Sequence                         | Site Analysis         |
|-------|-----------|---------|----------------------------------|-----------------------|
| 60.4  | 1621.7947 | 0.0045  | <a href="#">ANEQVVQSLNQTYK</a>   | Deamidated N10 62.78% |
| 58.1  | 1621.7947 | 0.0045  | <a href="#">ANEQVVQSLNQTYK</a>   | Deamidated Q11 36.97% |
| 36.3  | 1621.7947 | 0.0045  | <a href="#">ANEQVVQSLNQTYK</a>   | Deamidated Q7 0.24%   |
| 20.5  | 1621.7947 | 0.0045  | <a href="#">ANEQVVQSLNQTYK</a>   | Deamidated Q4 0.01%   |
| 13.8  | 1621.7947 | 0.0045  | <a href="#">ANEQVVQSLNQTYK</a>   | Deamidated N2 0.00%   |
| 5.6   | 1620.7995 | 0.9998  | <a href="#">ALEEQKEGLAENYK</a>   |                       |
| 2.5   | 1621.7916 | 0.0076  | <a href="#">VLDTLRDAMMSQAR</a>   |                       |
| 2.4   | 1621.8022 | -0.0029 | <a href="#">EDVPMFTSLKPOSK</a>   |                       |
| 2.2   | 1621.7995 | -0.0002 | <a href="#">AAGEVNPIGGKQHMGR</a> |                       |
| 2.2   | 1621.7995 | -0.0003 | <a href="#">AMPQDQVTQSPKHR</a>   |                       |

Mascot: <http://www.matrixscience.com/>

# MASCOT SCIENCE Mascot Search Results

## Peptide View

MS/MS Fragmentation of **AVLVNNTTGER**

Found in **C9JYM4** in **con\_Xuniprot\_HUMAN3**, C9JYM4\_HUMAN Golgi membrane protein 1 (Fragment) OS=Homo sapiens  
GN=GOLM1 PE=2 SV=1

Match to Query 1839: 1286.688688 from(644.351620,2+) intensity(20036.6523) rtinseconds(914) scans(2090) index(26492)  
Title: 111019\_Est\_MI\_YS\_G\_09Spectrum1787\_scans\_2090  
Data file C:\\mascot\\20140703\_Tmgf\_1D\\CSV\_UseAnalysis\\MasterCSV\\All\_Glyco\\mgf\\ptm\\UC18ERLIC\_PTM\_35D.mgf

Click mouse within plot area to zoom in by factor of two about that point

Or, to Da  
Label all possible matches Label matches used for scoring  
Show Y-axis

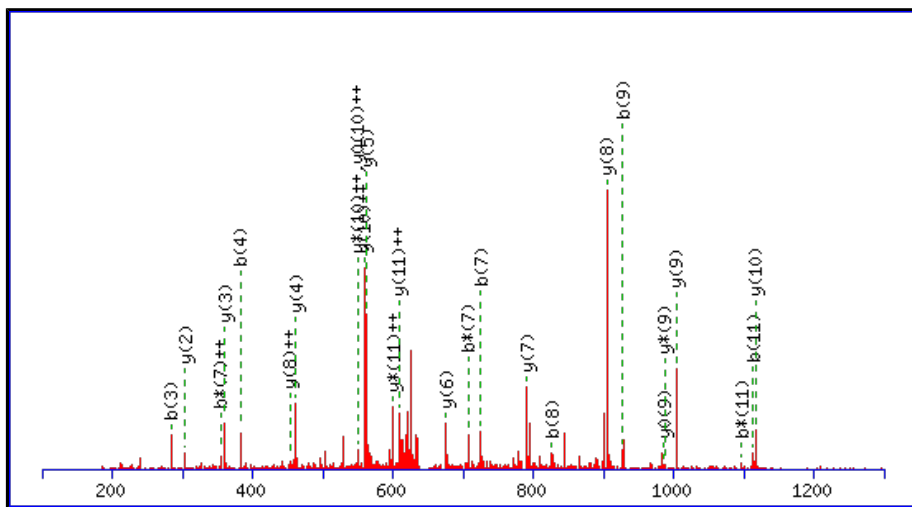

Monoisotopic mass of neutral peptide **Mr(calc)**: 1286.6830  
Fixed modifications: Carbamidomethyl (C) (apply to specified residues or termini only)  
Variable modifications:  
N6 : Deamidated (NQ)  
Ions Score: 52 Expect: 0.0012  
Matches : 26/108 fragment ions using 55 most intense peaks ([help](#))

| #  | b         | b <sup>++</sup> | b*        | b <sup>+++</sup> | b <sup>0</sup> | b <sup>0++</sup> | Seq. | y         | y <sup>++</sup> | y*        | y <sup>+++</sup> | y <sup>0</sup> | y <sup>0++</sup> | #  |
|----|-----------|-----------------|-----------|------------------|----------------|------------------|------|-----------|-----------------|-----------|------------------|----------------|------------------|----|
| 1  | 72.0444   | 36.5258         |           |                  |                |                  | A    |           |                 |           |                  |                |                  | 12 |
| 2  | 171.1128  | 86.0600         |           |                  |                |                  | V    | 1216.6532 | 608.8302        | 1199.6266 | 600.3170         | 1198.6426      | 599.8250         | 11 |
| 3  | 284.1969  | 142.6021        |           |                  |                |                  | L    | 1117.5848 | 559.2960        | 1100.5582 | 550.7828         | 1099.5742      | 550.2907         | 10 |
| 4  | 383.2653  | 192.1363        |           |                  |                |                  | V    | 1004.5007 | 502.7540        | 987.4742  | 494.2407         | 986.4902       | 493.7487         | 9  |
| 5  | 497.3082  | 249.1577        | 480.2817  | 240.6445         |                |                  | N    | 905.4323  | 453.2198        | 888.4058  | 444.7065         | 887.4217       | 444.2145         | 8  |
| 6  | 612.3352  | 306.6712        | 595.3086  | 298.1579         |                |                  | N    | 791.3894  | 396.1983        | 774.3628  | 387.6851         | 773.3788       | 387.1930         | 7  |
| 7  | 725.4192  | 363.2132        | 708.3927  | 354.7000         |                |                  | I    | 676.3624  | 338.6849        | 659.3359  | 330.1716         | 658.3519       | 329.6796         | 6  |
| 8  | 826.4669  | 413.7371        | 809.4403  | 405.2238         | 808.4563       | 404.7318         | T    | 563.2784  | 282.1428        | 546.2518  | 273.6295         | 545.2678       | 273.1375         | 5  |
| 9  | 927.5146  | 464.2609        | 910.4880  | 455.7477         | 909.5040       | 455.2556         | T    | 462.2307  | 231.6190        | 445.2041  | 223.1057         | 444.2201       | 222.6137         | 4  |
| 10 | 984.5360  | 492.7717        | 967.5095  | 484.2584         | 966.5255       | 483.7664         | G    | 361.1830  | 181.0951        | 344.1565  | 172.5819         | 343.1724       | 172.0899         | 3  |
| 11 | 1113.5786 | 557.2930        | 1096.5521 | 548.7797         | 1095.5681      | 548.2877         | E    | 304.1615  | 152.5844        | 287.1350  | 144.0711         | 286.1510       | 143.5791         | 2  |
| 12 |           |                 |           |                  |                |                  | R    | 175.1190  | 88.0631         | 158.0924  | 79.5498          |                |                  | 1  |

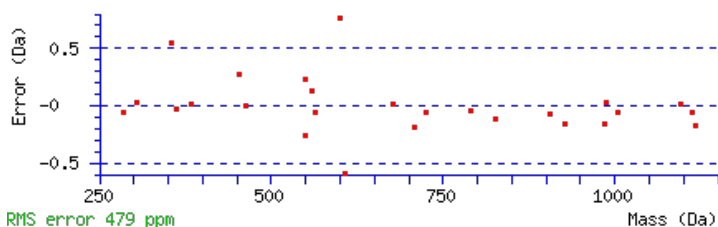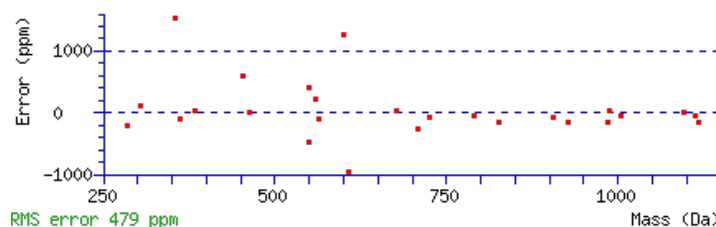

NCBI **BLAST** search of [AVLVNNITTGER](#)

(Parameters: blastp, nr protein database, expect=20000, no filter, PAM30)

Other BLAST [web gateways](#)

**All matches to this query**

| Score | Mr(calc)  | Delta  | Sequence                      | Site Analysis        |
|-------|-----------|--------|-------------------------------|----------------------|
| 52.4  | 1286.6830 | 0.0057 | <a href="#">AVLVNNITTGER</a>  | Deamidated N6 92.89% |
| 41.2  | 1286.6830 | 0.0057 | <a href="#">AVLVNNITTGER</a>  | Deamidated N5 7.11%  |
| 5.3   | 1286.6843 | 0.0043 | <a href="#">RPQWRSTSLR</a>    |                      |
| 3.0   | 1286.6871 | 0.0016 | <a href="#">LGGVNVVVTDVK</a>  |                      |
| 0.4   | 1285.6851 | 1.0036 | <a href="#">GARGGNLVTGTQR</a> |                      |

**Mascot:** <http://www.matrixscience.com/>

# MASCOT SCIENCE Mascot Search Results

## Peptide View

MS/MS Fragmentation of **KQVHFFVNASDVNDVK**

Found in **Q96IY4** in **con\_Xuniprot\_HUMAN3**, CBPB2\_HUMAN Carboxypeptidase B2 OS=Homo sapiens GN=CPB2 PE=1 SV=2

Match to Query 10953: 1846.928428 from(924.471490,2+) intensity(39045.0430) rtinseconds(987) scans(2418) index(4296)

Title: 111019\_Est\_ISCardio\_NMI\_YP\_G\_7Spectrum2093\_scans\_\_2418

Data file C:\\mascot\\20140703\_Tmgf\_1D\\CSV\_UseAnalysis\\MasterCSV\\All\_Glyco\\mgf\\ptm\\UC18ERLIC\_PTM\_35D.mgf

Click mouse within plot area to zoom in by factor of two about that point

Or, to Da

Label all possible matches Label matches used for scoring

Show Y-axis

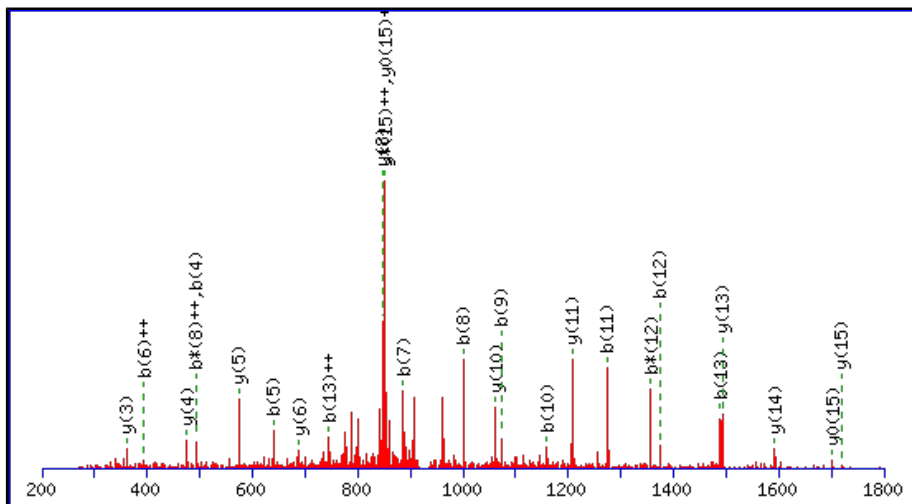

Monoisotopic mass of neutral peptide Mr(calc): 1846.9214

Fixed modifications: Carbamidomethyl (C) (apply to specified residues or termini only)

Variable modifications:

N8 : Deamidated (NQ)

Ions Score: 100 Expect: 2.5e-008

Matches : 28/156 fragment ions using 32 most intense peaks ([help](#))

| #  | b         | b <sup>++</sup> | b <sup>*</sup> | b <sup>*++</sup> | b <sup>0</sup> | b <sup>0++</sup> | Seq. | y         | y <sup>++</sup> | y <sup>*</sup> | y <sup>*++</sup> | y <sup>0</sup> | y <sup>0++</sup> | #  |
|----|-----------|-----------------|----------------|------------------|----------------|------------------|------|-----------|-----------------|----------------|------------------|----------------|------------------|----|
| 1  | 129.1022  | 65.0548         | 112.0757       | 56.5415          |                |                  | K    |           |                 |                |                  |                |                  | 16 |
| 2  | 257.1608  | 129.0840        | 240.1343       | 120.5708         |                |                  | Q    | 1719.8337 | 860.4205        | 1702.8071      | 851.9072         | 1701.8231      | 851.4152         | 15 |
| 3  | 356.2292  | 178.6183        | 339.2027       | 170.1050         |                |                  | V    | 1591.7751 | 796.3912        | 1574.7485      | 787.8779         | 1573.7645      | 787.3859         | 14 |
| 4  | 493.2881  | 247.1477        | 476.2616       | 238.6344         |                |                  | H    | 1492.7067 | 746.8570        | 1475.6801      | 738.3437         | 1474.6961      | 737.8517         | 13 |
| 5  | 640.3566  | 320.6819        | 623.3300       | 312.1686         |                |                  | F    | 1355.6478 | 678.3275        | 1338.6212      | 669.8142         | 1337.6372      | 669.3222         | 12 |
| 6  | 787.4250  | 394.2161        | 770.3984       | 385.7028         |                |                  | F    | 1208.5794 | 604.7933        | 1191.5528      | 596.2800         | 1190.5688      | 595.7880         | 11 |
| 7  | 886.4934  | 443.7503        | 869.4668       | 435.2371         |                |                  | V    | 1061.5109 | 531.2591        | 1044.4844      | 522.7458         | 1043.5004      | 522.2538         | 10 |
| 8  | 1001.5203 | 501.2638        | 984.4938       | 492.7505         |                |                  | N    | 962.4425  | 481.7249        | 945.4160       | 473.2116         | 944.4320       | 472.7196         | 9  |
| 9  | 1072.5574 | 536.7824        | 1055.5309      | 528.2691         |                |                  | A    | 847.4156  | 424.2114        | 830.3890       | 415.6982         | 829.4050       | 415.2061         | 8  |
| 10 | 1159.5895 | 580.2984        | 1142.5629      | 571.7851         | 1141.5789      | 571.2931         | S    | 776.3785  | 388.6929        | 759.3519       | 380.1796         | 758.3679       | 379.6876         | 7  |
| 11 | 1274.6164 | 637.8118        | 1257.5899      | 629.2986         | 1256.6058      | 628.8066         | D    | 689.3464  | 345.1769        | 672.3199       | 336.6636         | 671.3359       | 336.1716         | 6  |
| 12 | 1373.6848 | 687.3461        | 1356.6583      | 678.8328         | 1355.6743      | 678.3408         | V    | 574.3195  | 287.6634        | 557.2930       | 279.1501         | 556.3089       | 278.6581         | 5  |
| 13 | 1488.7118 | 744.8595        | 1471.6852      | 736.3462         | 1470.7012      | 735.8542         | D    | 475.2511  | 238.1292        | 458.2245       | 229.6159         | 457.2405       | 229.1239         | 4  |
| 14 | 1602.7547 | 801.8810        | 1585.7281      | 793.3677         | 1584.7441      | 792.8757         | N    | 360.2241  | 180.6157        | 343.1976       | 172.1024         |                |                  | 3  |
| 15 | 1701.8231 | 851.4152        | 1684.7966      | 842.9019         | 1683.8125      | 842.4099         | V    | 246.1812  | 123.5942        | 229.1547       | 115.0810         |                |                  | 2  |
| 16 |           |                 |                |                  |                |                  | K    | 147.1128  | 74.0600         | 130.0863       | 65.5468          |                |                  | 1  |

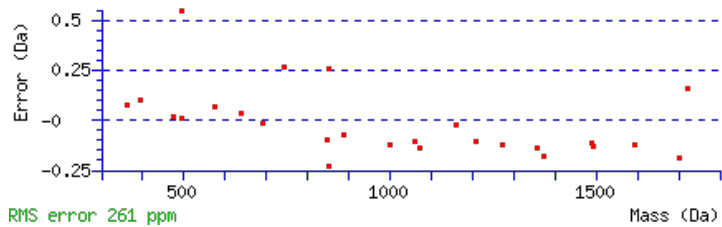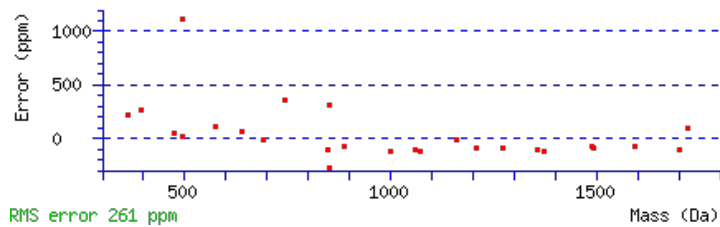

NCBI **BLAST** search of [KQVHFFVNASDVDNVK](#)

(Parameters: blastp, nr protein database, expect=20000, no filter, PAM30)

Other BLAST [web gateways](#)

**All matches to this query**

| Score | Mr(calc)  | Delta   | Sequence                         | Site Analysis         |
|-------|-----------|---------|----------------------------------|-----------------------|
| 100.3 | 1846.9214 | 0.0071  | <a href="#">KQVHFFVNASDVDNVK</a> | Deamidated N8 100.00% |
| 43.3  | 1846.9214 | 0.0071  | <a href="#">KQVHFFVNASDVDNVK</a> | Deamidated Q2 0.00%   |
| 39.5  | 1846.9214 | 0.0071  | <a href="#">KQVHFFVNASDVDNVK</a> | Deamidated N14 0.00%  |
| 10.8  | 1846.9254 | 0.0031  | <a href="#">FVLDYFFEEKQNL</a>    |                       |
| 9.8   | 1846.9346 | -0.0061 | <a href="#">QMIEQLQNSKAVIQSK</a> |                       |
| 9.8   | 1846.9346 | -0.0061 | <a href="#">QMIEQLQNSKAVIQSK</a> |                       |
| 9.8   | 1846.9346 | -0.0061 | <a href="#">QMIEQLQNSKAVIQSK</a> |                       |
| 9.8   | 1846.9346 | -0.0061 | <a href="#">QMIEQLQNSKAVIQSK</a> |                       |
| 8.6   | 1846.9254 | 0.0031  | <a href="#">FIVDYFFEEKQNL</a>    |                       |
| 6.9   | 1845.9319 | 0.9965  | <a href="#">QDNNTRIEAVKSLVQK</a> |                       |

Mascot: <http://www.matrixscience.com/>

# MASCOT SCIENCE Mascot Search Results

## Peptide View

MS/MS Fragmentation of **KKQVHFFVNASDVDNVK**

Found in **Q96IY4** in **con\_Xuniprot\_HUMAN3**, CBPB2\_HUMAN Carboxypeptidase B2 OS=Homo sapiens GN=CPB2 PE=1 SV=2

Match to Query 11890: 1975.023432 from(659.348420,3+) intensity(30812.8301) rtinseconds(803) scans(1802) index(2522)

Title: 111019\_Est\_ISCardio\_NMI\_YP\_G\_5Spectrum1523\_scans\_\_1802

Data file C:\\mascot\\20140703\_Tmgf\_1D\\CSV\_UseAnalysis\\MasterCSV\\All\_Glyco\\mgf\\ptm\\UC18ERLIC\_PTM\_35D.mgf

Click mouse within plot area to zoom in by factor of two about that point

Or, to Da

Label all possible matches Label matches used for scoring

Show Y-axis

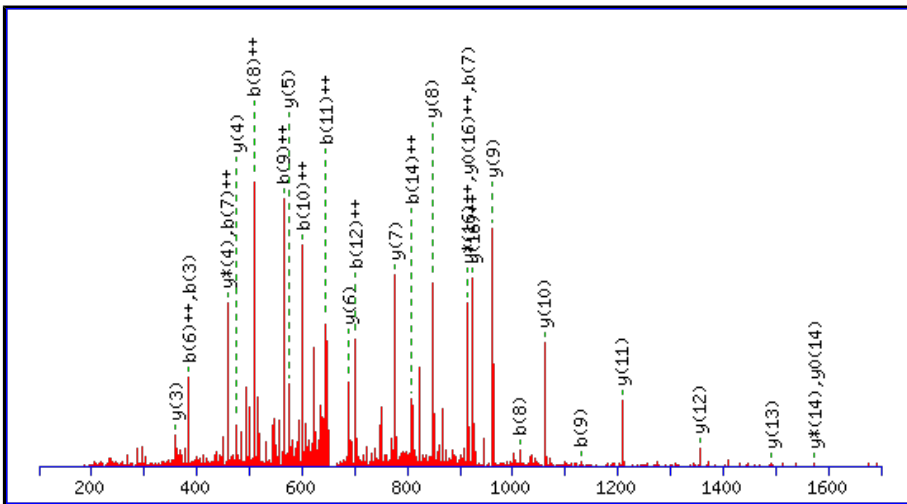

Monoisotopic mass of neutral peptide Mr(calc): 1975.0163

Fixed modifications: Carbamidomethyl (C) (apply to specified residues or termini only)

Variable modifications:

N9 : Deamidated (NQ)

Ions Score: 66 Expect: 6.1e-005

Matches : 30/166 fragment ions using 44 most intense peaks ([help](#))

| #  | b         | b <sup>++</sup> | b <sup>*</sup> | b <sup>*++</sup> | b <sup>0</sup> | b <sup>0++</sup> | Seq. | y         | y <sup>++</sup> | y <sup>*</sup> | y <sup>*++</sup> | y <sup>0</sup> | y <sup>0++</sup> | #  |
|----|-----------|-----------------|----------------|------------------|----------------|------------------|------|-----------|-----------------|----------------|------------------|----------------|------------------|----|
| 1  | 129.1022  | 65.0548         | 112.0757       | 56.5415          |                |                  | K    |           |                 |                |                  |                |                  | 17 |
| 2  | 257.1972  | 129.1022        | 240.1707       | 120.5890         |                |                  | K    | 1847.9286 | 924.4680        | 1830.9021      | 915.9547         | 1829.9181      | 915.4627         | 16 |
| 3  | 385.2558  | 193.1315        | 368.2292       | 184.6183         |                |                  | Q    | 1719.8337 | 860.4205        | 1702.8071      | 851.9072         | 1701.8231      | 851.4152         | 15 |
| 4  | 484.3242  | 242.6657        | 467.2976       | 234.1525         |                |                  | V    | 1591.7751 | 796.3912        | 1574.7485      | 787.8779         | 1573.7645      | 787.3859         | 14 |
| 5  | 621.3831  | 311.1952        | 604.3566       | 302.6819         |                |                  | H    | 1492.7067 | 746.8570        | 1475.6801      | 738.3437         | 1474.6961      | 737.8517         | 13 |
| 6  | 768.4515  | 384.7294        | 751.4250       | 376.2161         |                |                  | F    | 1355.6478 | 678.3275        | 1338.6212      | 669.8142         | 1337.6372      | 669.3222         | 12 |
| 7  | 915.5199  | 458.2636        | 898.4934       | 449.7503         |                |                  | F    | 1208.5794 | 604.7933        | 1191.5528      | 596.2800         | 1190.5688      | 595.7880         | 11 |
| 8  | 1014.5883 | 507.7978        | 997.5618       | 499.2845         |                |                  | V    | 1061.5109 | 531.2591        | 1044.4844      | 522.7458         | 1043.5004      | 522.2538         | 10 |
| 9  | 1129.6153 | 565.3113        | 1112.5887      | 556.7980         |                |                  | N    | 962.4425  | 481.7249        | 945.4160       | 473.2116         | 944.4320       | 472.7196         | 9  |
| 10 | 1200.6524 | 600.8298        | 1183.6259      | 592.3166         |                |                  | A    | 847.4156  | 424.2114        | 830.3890       | 415.6982         | 829.4050       | 415.2061         | 8  |
| 11 | 1287.6844 | 644.3459        | 1270.6579      | 635.8326         | 1269.6739      | 635.3406         | S    | 776.3785  | 388.6929        | 759.3519       | 380.1796         | 758.3679       | 379.6876         | 7  |
| 12 | 1402.7114 | 701.8593        | 1385.6848      | 693.3461         | 1384.7008      | 692.8540         | D    | 689.3464  | 345.1769        | 672.3199       | 336.6636         | 671.3359       | 336.1716         | 6  |
| 13 | 1501.7798 | 751.3935        | 1484.7532      | 742.8803         | 1483.7692      | 742.3883         | V    | 574.3195  | 287.6634        | 557.2930       | 279.1501         | 556.3089       | 278.6581         | 5  |
| 14 | 1616.8067 | 808.9070        | 1599.7802      | 800.3937         | 1598.7962      | 799.9017         | D    | 475.2511  | 238.1292        | 458.2245       | 229.6159         | 457.2405       | 229.1239         | 4  |
| 15 | 1730.8497 | 865.9285        | 1713.8231      | 857.4152         | 1712.8391      | 856.9232         | N    | 360.2241  | 180.6157        | 343.1976       | 172.1024         |                |                  | 3  |
| 16 | 1829.9181 | 915.4627        | 1812.8915      | 906.9494         | 1811.9075      | 906.4574         | V    | 246.1812  | 123.5942        | 229.1547       | 115.0810         |                |                  | 2  |
| 17 |           |                 |                |                  |                |                  | K    | 147.1128  | 74.0600         | 130.0863       | 65.5468          |                |                  | 1  |

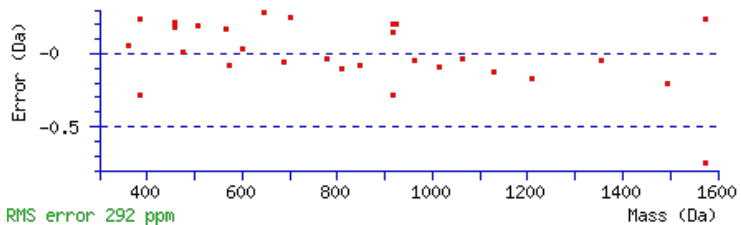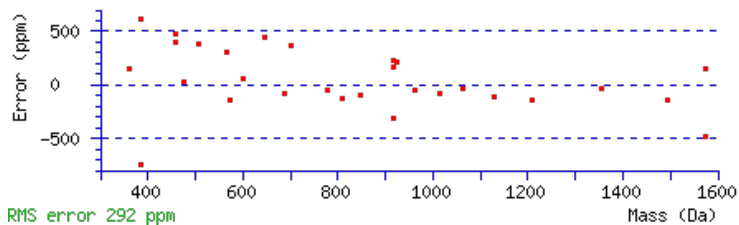

NCBI BLAST search of [KKQVHFFVNASDVDNVK](#)  
 (Parameters: blastp, nr protein database, expect=20000, no filter, PAM30)  
 Other BLAST [web gateways](#)

**All matches to this query**

| Score | Mr(calc)  | Delta   | Sequence                            | Site Analysis        |
|-------|-----------|---------|-------------------------------------|----------------------|
| 65.8  | 1975.0163 | 0.0071  | <a href="#">KKQVHFFVNASDVDNVK</a>   | Deamidated N9 99.52% |
| 40.2  | 1975.0163 | 0.0071  | <a href="#">KKQVHFFVNASDVDNVK</a>   | Deamidated Q3 0.27%  |
| 39.1  | 1975.0163 | 0.0071  | <a href="#">KKQVHFFVNASDVDNVK</a>   | Deamidated N15 0.21% |
| 4.5   | 1974.0170 | 1.0064  | <a href="#">FNENLRDAVQLNVIATR</a>   |                      |
| 2.1   | 1973.0265 | 1.9970  | <a href="#">SARIMSFHEAASIERR</a>    |                      |
| 0.8   | 1974.0105 | 1.0129  | <a href="#">LFTIPROGMAQADGINAR</a>  |                      |
| 0.6   | 1975.0309 | -0.0075 | <a href="#">QVAEQFLNMRGGLGLSGAK</a> |                      |
| 0.5   | 1975.0309 | -0.0075 | <a href="#">AGSLGLGGRMNLFQEAVQK</a> |                      |
| 0.2   | 1975.0316 | -0.0082 | <a href="#">FIENVQPWIKGTSGQPR</a>   |                      |
| 0.1   | 1974.0244 | 0.9990  | <a href="#">IWNRLMVVSDEKENIK</a>    |                      |

Mascot: <http://www.matrixscience.com/>



# MATRIX SCIENCE Mascot Search Results

## Peptide View

MS/MS Fragmentation of **QVHFFVNASDVNDVK**

Found in **Q96IY4** in **con\_Xuniprot\_HUMAN3**, CBPB2\_HUMAN Carboxypeptidase B2 OS=Homo sapiens GN=CPB2 PE=1 SV=2

Match to Query 8723: 1718.831408 from(860.422980,2+) intensity(27278.6230) rtinseconds(1372) scans(3251) index(12560)

Title: 111019\_Est\_ISCardio\_NMI\_YS\_G\_9Spectrum2836\_scans\_\_3251

Data file C:\\mascot\\20140703\_Tmgf\_1D\\CSV\_UseAnalysis\\MasterCSV\\All\_Glyco\\mgf\\ptm\\UC18ERLIC\_PTM\_35D.mgf

Click mouse within plot area to zoom in by factor of two about that point

Or, to Da

Label all possible matches Label matches used for scoring

Show Y-axis

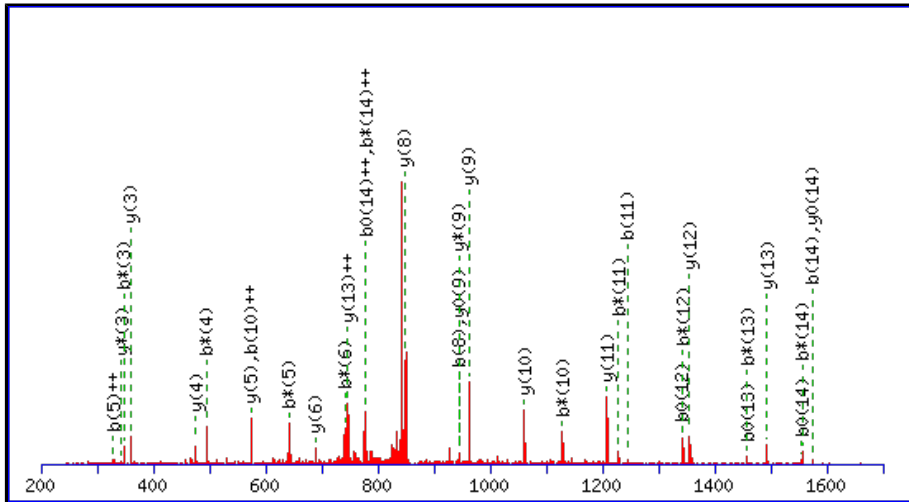

Monoisotopic mass of neutral peptide Mr(calc): 1718.8264

Fixed modifications: Carbamidomethyl (C) (apply to specified residues or termini only)

Variable modifications:

N7 : Deamidated (NQ)

Ions Score: 60 Expect: 0.00025

Matches : 34/146 fragment ions using 57 most intense peaks ([help](#))

| #  | b         | b <sup>++</sup> | b <sup>*</sup> | b <sup>*++</sup> | b <sup>0</sup> | b <sup>0++</sup> | Seq. | y         | y <sup>++</sup> | y <sup>*</sup> | y <sup>*++</sup> | y <sup>0</sup> | y <sup>0++</sup> | #  |
|----|-----------|-----------------|----------------|------------------|----------------|------------------|------|-----------|-----------------|----------------|------------------|----------------|------------------|----|
| 1  | 129.0659  | 65.0366         | 112.0393       | 56.5233          |                |                  | Q    |           |                 |                |                  |                |                  | 15 |
| 2  | 228.1343  | 114.5708        | 211.1077       | 106.0575         |                |                  | V    | 1591.7751 | 796.3912        | 1574.7485      | 787.8779         | 1573.7645      | 787.3859         | 14 |
| 3  | 365.1932  | 183.1002        | 348.1666       | 174.5870         |                |                  | H    | 1492.7067 | 746.8570        | 1475.6801      | 738.3437         | 1474.6961      | 737.8517         | 13 |
| 4  | 512.2616  | 256.6344        | 495.2350       | 248.1212         |                |                  | F    | 1355.6478 | 678.3275        | 1338.6212      | 669.8142         | 1337.6372      | 669.3222         | 12 |
| 5  | 659.3300  | 330.1686        | 642.3035       | 321.6554         |                |                  | F    | 1208.5794 | 604.7933        | 1191.5528      | 596.2800         | 1190.5688      | 595.7880         | 11 |
| 6  | 758.3984  | 379.7028        | 741.3719       | 371.1896         |                |                  | V    | 1061.5109 | 531.2591        | 1044.4844      | 522.7458         | 1043.5004      | 522.2538         | 10 |
| 7  | 873.4254  | 437.2163        | 856.3988       | 428.7030         |                |                  | N    | 962.4425  | 481.7249        | 945.4160       | 473.2116         | 944.4320       | 472.7196         | 9  |
| 8  | 944.4625  | 472.7349        | 927.4359       | 464.2216         |                |                  | A    | 847.4156  | 424.2114        | 830.3890       | 415.6982         | 829.4050       | 415.2061         | 8  |
| 9  | 1031.4945 | 516.2509        | 1014.4680      | 507.7376         | 1013.4839      | 507.2456         | S    | 776.3785  | 388.6929        | 759.3519       | 380.1796         | 758.3679       | 379.6876         | 7  |
| 10 | 1146.5215 | 573.7644        | 1129.4949      | 565.2511         | 1128.5109      | 564.7591         | D    | 689.3464  | 345.1769        | 672.3199       | 336.6636         | 671.3359       | 336.1716         | 6  |
| 11 | 1245.5899 | 623.2986        | 1228.5633      | 614.7853         | 1227.5793      | 614.2933         | V    | 574.3195  | 287.6634        | 557.2930       | 279.1501         | 556.3089       | 278.6581         | 5  |
| 12 | 1360.6168 | 680.8120        | 1343.5903      | 672.2988         | 1342.6062      | 671.8068         | D    | 475.2511  | 238.1292        | 458.2245       | 229.6159         | 457.2405       | 229.1239         | 4  |
| 13 | 1474.6597 | 737.8335        | 1457.6332      | 729.3202         | 1456.6492      | 728.8282         | N    | 360.2241  | 180.6157        | 343.1976       | 172.1024         |                |                  | 3  |
| 14 | 1573.7281 | 787.3677        | 1556.7016      | 778.8544         | 1555.7176      | 778.3624         | V    | 246.1812  | 123.5942        | 229.1547       | 115.0810         |                |                  | 2  |
| 15 |           |                 |                |                  |                |                  | K    | 147.1128  | 74.0600         | 130.0863       | 65.5468          |                |                  | 1  |

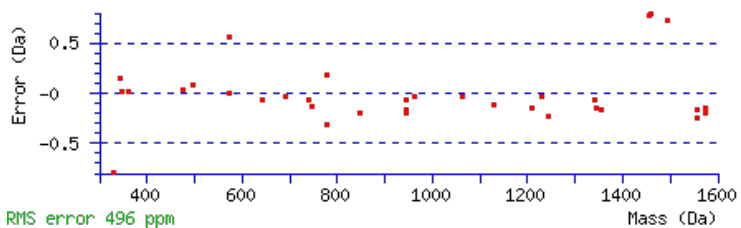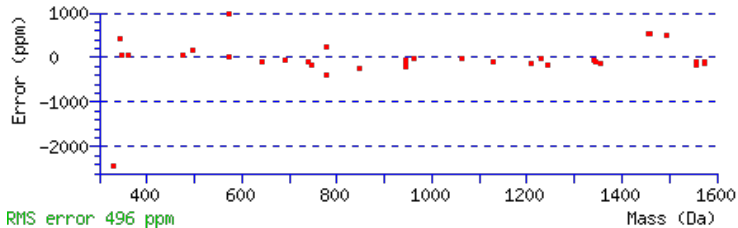

NCBI **BLAST** search of [QVHFFVNASDVVDNVK](#)

(Parameters: blastp, nr protein database, expect=20000, no filter, PAM30)

Other BLAST [web gateways](#)

**All matches to this query**

| Score | Mr(calc)  | Delta   | Sequence                            | Site Analysis        |
|-------|-----------|---------|-------------------------------------|----------------------|
| 59.7  | 1718.8264 | 0.0050  | <a href="#">QVHFFVNASDVVDNVK</a>    | Deamidated N7 99.68% |
| 34.1  | 1718.8264 | 0.0050  | <a href="#">QVHFFVNASDVVDNVK</a>    | Deamidated N13 0.28% |
| 26.4  | 1718.8264 | 0.0050  | <a href="#">QVHFFVNASDVVDNVK</a>    | Deamidated Q1 0.05%  |
| 9.0   | 1718.8336 | -0.0022 | <a href="#">AGVGEVGGGPAPEPGQGRQ</a> |                      |
| 4.7   | 1717.8305 | 1.0009  | <a href="#">LSQMIEQADIRGDNK</a>     |                      |
| 3.9   | 1718.8396 | -0.0082 | <a href="#">VANAEKLMDDLK</a>        |                      |
| 3.3   | 1717.8312 | 1.0002  | <a href="#">VDPWSFTETPSLPSR</a>     |                      |
| 1.8   | 1718.8264 | 0.0050  | <a href="#">VNDVDSANVFFHVQK</a>     |                      |
| 1.3   | 1718.8284 | 0.0030  | <a href="#">MVEVOLDENLSPTVK</a>     |                      |

Mascot: <http://www.matrixscience.com/>

# MASCOT SCIENCE Mascot Search Results

## Peptide View

MS/MS Fragmentation of **KQVHFFVNASDVNVK**

Found in **Q96IY4** in **con\_Xuniprot\_HUMAN3**, CBPB2\_HUMAN Carboxypeptidase B2 OS=Homo sapiens GN=CPB2 PE=1 SV=2

Match to Query 10957: 1849.911972 from(617.644600,3+) intensity(31361.2129) rtinseconds(1059) scans(2642) index(23857)

Title: 111019\_Est\_MI\_YS\_G\_05Spectrum2252\_scans\_\_2642

Data file C:\\mascot\\20140703\_Tmgf\_1D\\CSV\_UseAnalysis\\MasterCSV\\All\_Glyco\\mgf\\ptm\\UC18ERLIC\_PTM\_35D.mgf

Click mouse within plot area to zoom in by factor of two about that point

Or, to Da

Label all possible matches Label matches used for scoring

Show Y-axis

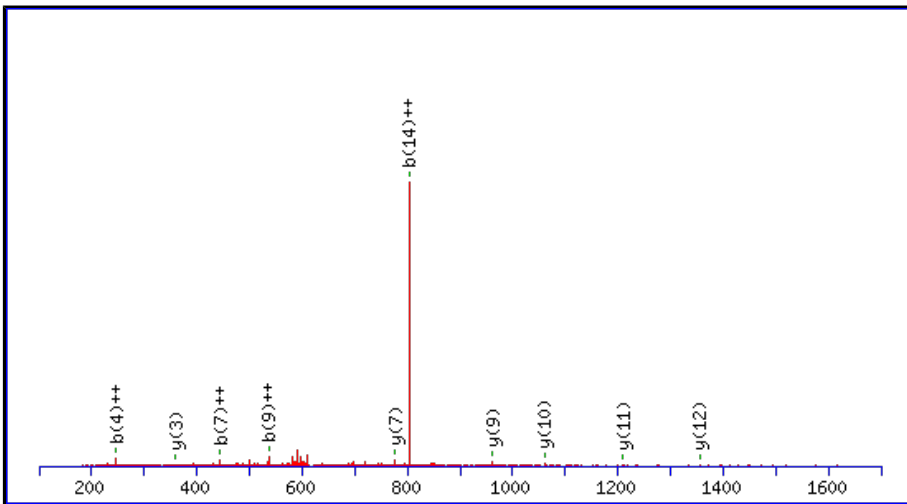

Monoisotopic mass of neutral peptide Mr(calc): 1847.9054

Fixed modifications: Carbamidomethyl (C) (apply to specified residues or termini only)

Variable modifications:

Q2 : Deamidated (NQ)

N8 : Deamidated (NQ)

Ions Score: 38 Expect: 0.042

Matches : 10/156 fragment ions using 15 most intense peaks ([help](#))

| #  | b         | b <sup>++</sup> | b*        | b <sup>+++</sup> | b <sup>0</sup> | b <sup>0++</sup> | Seq.     | y                | y <sup>++</sup> | y*        | y <sup>+++</sup> | y <sup>0</sup> | y <sup>0++</sup> | #  |
|----|-----------|-----------------|-----------|------------------|----------------|------------------|----------|------------------|-----------------|-----------|------------------|----------------|------------------|----|
| 1  | 129.1022  | 65.0548         | 112.0757  | 56.5415          |                |                  | <b>K</b> |                  |                 |           |                  |                |                  | 16 |
| 2  | 258.1448  | 129.5761        | 241.1183  | 121.0628         |                |                  | <b>Q</b> | 1720.8177        | 860.9125        | 1703.7911 | 852.3992         | 1702.8071      | 851.9072         | 15 |
| 3  | 357.2132  | 179.1103        | 340.1867  | 170.5970         |                |                  | <b>V</b> | 1591.7751        | 796.3912        | 1574.7485 | 787.8779         | 1573.7645      | 787.3859         | 14 |
| 4  | 494.2722  | <b>247.6397</b> | 477.2456  | 239.1264         |                |                  | <b>H</b> | 1492.7067        | 746.8570        | 1475.6801 | 738.3437         | 1474.6961      | 737.8517         | 13 |
| 5  | 641.3406  | 321.1739        | 624.3140  | 312.6607         |                |                  | <b>F</b> | <b>1355.6478</b> | 678.3275        | 1338.6212 | 669.8142         | 1337.6372      | 669.3222         | 12 |
| 6  | 788.4090  | 394.7081        | 771.3824  | 386.1949         |                |                  | <b>F</b> | <b>1208.5794</b> | 604.7933        | 1191.5528 | 596.2800         | 1190.5688      | 595.7880         | 11 |
| 7  | 887.4774  | <b>444.2423</b> | 870.4509  | 435.7291         |                |                  | <b>V</b> | <b>1061.5109</b> | 531.2591        | 1044.4844 | 522.7458         | 1043.5004      | 522.2538         | 10 |
| 8  | 1002.5043 | 501.7558        | 985.4778  | 493.2425         |                |                  | <b>N</b> | <b>962.4425</b>  | 481.7249        | 945.4160  | 473.2116         | 944.4320       | 472.7196         | 9  |
| 9  | 1073.5415 | <b>537.2744</b> | 1056.5149 | 528.7611         |                |                  | <b>A</b> | 847.4156         | 424.2114        | 830.3890  | 415.6982         | 829.4050       | 415.2061         | 8  |
| 10 | 1160.5735 | 580.7904        | 1143.5469 | 572.2771         | 1142.5629      | 571.7851         | <b>S</b> | <b>776.3785</b>  | 388.6929        | 759.3519  | 380.1796         | 758.3679       | 379.6876         | 7  |
| 11 | 1275.6004 | 638.3039        | 1258.5739 | 629.7906         | 1257.5899      | 629.2986         | <b>D</b> | 689.3464         | 345.1769        | 672.3199  | 336.6636         | 671.3359       | 336.1716         | 6  |
| 12 | 1374.6688 | 687.8381        | 1357.6423 | 679.3248         | 1356.6583      | 678.8328         | <b>V</b> | 574.3195         | 287.6634        | 557.2930  | 279.1501         | 556.3089       | 278.6581         | 5  |
| 13 | 1489.6958 | 745.3515        | 1472.6692 | 736.8383         | 1471.6852      | 736.3462         | <b>D</b> | 475.2511         | 238.1292        | 458.2245  | 229.6159         | 457.2405       | 229.1239         | 4  |
| 14 | 1603.7387 | <b>802.3730</b> | 1586.7122 | 793.8597         | 1585.7281      | 793.3677         | <b>N</b> | <b>360.2241</b>  | 180.6157        | 343.1976  | 172.1024         |                |                  | 3  |
| 15 | 1702.8071 | 851.9072        | 1685.7806 | 843.3939         | 1684.7966      | 842.9019         | <b>V</b> | 246.1812         | 123.5942        | 229.1547  | 115.0810         |                |                  | 2  |
| 16 |           |                 |           |                  |                |                  | <b>K</b> | 147.1128         | 74.0600         | 130.0863  | 65.5468          |                |                  | 1  |

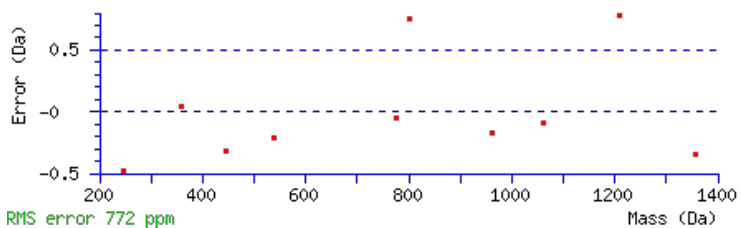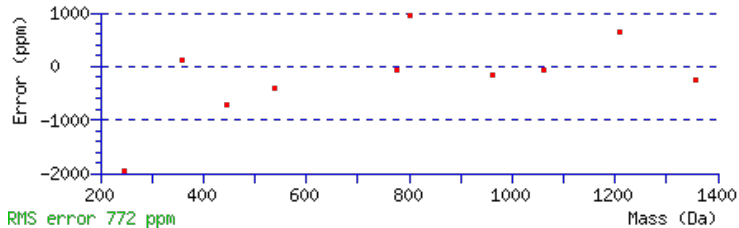

NCBI BLAST search of [KQVHFFVNASDVNDVK](#)

(Parameters: blastp, nr protein database, expect=20000, no filter, PAM30)

Other BLAST [web gateways](#)

**All matches to this query**

| Score | Mr(calc)  | Delta  | Sequence                           | Site Analysis             |
|-------|-----------|--------|------------------------------------|---------------------------|
| 37.9  | 1847.9054 | 2.0066 | <a href="#">KQVHFFVNASDVNDVK</a>   | Deamidated Q2, N8 59.07%  |
| 35.2  | 1847.9054 | 2.0066 | <a href="#">KQVHFFVNASDVNDVK</a>   | Deamidated N8, N14 31.50% |
| 30.0  | 1847.9054 | 2.0066 | <a href="#">KQVHFFVNASDVNDVK</a>   | Deamidated Q2, N14 9.43%  |
| 8.0   | 1849.9026 | 0.0094 | <a href="#">VMLTNGGQRIMNVVQR</a>   |                           |
| 6.9   | 1847.9113 | 2.0007 | <a href="#">NQVTATKADGGTQVIDTK</a> |                           |
| 6.9   | 1847.9113 | 2.0007 | <a href="#">NQVTATKADGGTQVIDTK</a> |                           |
| 6.6   | 1849.9066 | 0.0053 | <a href="#">VMPICLPSKDYAEVGR</a>   |                           |
| 6.6   | 1849.9066 | 0.0054 | <a href="#">VMPICLPSKNYAEVGR</a>   |                           |
| 6.3   | 1848.9006 | 1.0114 | <a href="#">NQFWVQVRAESLNR</a>     |                           |
| 5.6   | 1849.9057 | 0.0062 | <a href="#">DAAEADRTLFGNLETK</a>   |                           |

Mascot: <http://www.matrixscience.com/>

# MATRIX SCIENCE Mascot Search Results

## Peptide View

MS/MS Fragmentation of **GFGVAIVGNKYTAALPTEAALR**

Found in **Q96PD5** in **con\_Xuniprot\_HUMAN3**, PGRP2\_HUMAN N-acetylmuramoyl-L-alanine amidase OS=Homo sapiens GN=PGLYRP2 PE=1 SV=1

Match to Query 13413: 2091.108668 from(1046.561610,2+) intensity(43503.0352) rtinseconds(2292) scans(6159) index(24140)

Title: 111019\_Est\_MI\_YS\_G\_05Spectrum5338\_scans\_\_6159

Data file C:\mascot\20140703\_Tmgf\_1D\CSV\_UseAnalysis\MasterCSV\All\_Glyco\mgf\ptm\UC18ERLIC\_PTM\_35D.mgf

Click mouse within plot area to zoom in by factor of two about that point

Or, to Da

Label all possible matches Label matches used for scoring

Show Y-axis

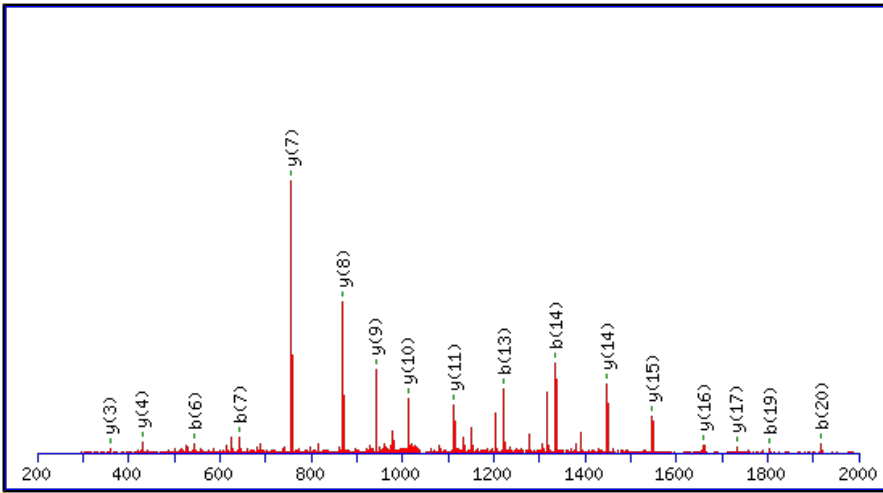

Monoisotopic mass of neutral peptide **Mr(calc):** 2091.1000

**Fixed modifications:** Carbamidomethyl (C) (apply to specified residues or termini only)

**Variable modifications:**

**N9** : Deamidated (NQ)

**Ions Score:** 111 **Expect:** 1.6e-009

**Matches :** 17/196 fragment ions using 17 most intense peaks ([help](#))

| #  | b                | b <sup>++</sup> | b*        | b <sup>+++</sup> | b <sup>0</sup> | b <sup>0++</sup> | Seq. | y                | y <sup>++</sup> | y*        | y <sup>+++</sup> | y <sup>0</sup> | y <sup>0++</sup> | #  |
|----|------------------|-----------------|-----------|------------------|----------------|------------------|------|------------------|-----------------|-----------|------------------|----------------|------------------|----|
| 1  | 58.0287          | 29.5180         |           |                  |                |                  | G    |                  |                 |           |                  |                |                  | 21 |
| 2  | 205.0972         | 103.0522        |           |                  |                |                  | F    | 2035.0859        | 1018.0466       | 2018.0593 | 1009.5333        | 2017.0753      | 1009.0413        | 20 |
| 3  | 262.1186         | 131.5629        |           |                  |                |                  | G    | 1888.0175        | 944.5124        | 1870.9909 | 935.9991         | 1870.0069      | 935.5071         | 19 |
| 4  | 361.1870         | 181.0972        |           |                  |                |                  | V    | 1830.9960        | 916.0016        | 1813.9694 | 907.4884         | 1812.9854      | 906.9964         | 18 |
| 5  | 432.2241         | 216.6157        |           |                  |                |                  | A    | <b>1731.9276</b> | 866.4674        | 1714.9010 | 857.9542         | 1713.9170      | 857.4621         | 17 |
| 6  | <b>545.3082</b>  | 273.1577        |           |                  |                |                  | I    | <b>1660.8905</b> | 830.9489        | 1643.8639 | 822.4356         | 1642.8799      | 821.9436         | 16 |
| 7  | <b>644.3766</b>  | 322.6920        |           |                  |                |                  | V    | <b>1547.8064</b> | 774.4068        | 1530.7799 | 765.8936         | 1529.7958      | 765.4016         | 15 |
| 8  | 701.3981         | 351.2027        |           |                  |                |                  | G    | <b>1448.7380</b> | 724.8726        | 1431.7114 | 716.3594         | 1430.7274      | 715.8673         | 14 |
| 9  | 816.4250         | 408.7162        | 799.3985  | 400.2029         |                |                  | N    | 1391.7165        | 696.3619        | 1374.6900 | 687.8486         | 1373.7060      | 687.3566         | 13 |
| 10 | 979.4884         | 490.2478        | 962.4618  | 481.7345         |                |                  | Y    | 1276.6896        | 638.8484        | 1259.6630 | 630.3352         | 1258.6790      | 629.8431         | 12 |
| 11 | 1080.5360        | 540.7717        | 1063.5095 | 532.2584         | 1062.5255      | 531.7664         | T    | <b>1113.6263</b> | 557.3168        | 1096.5997 | 548.8035         | 1095.6157      | 548.3115         | 11 |
| 12 | 1151.5732        | 576.2902        | 1134.5466 | 567.7769         | 1133.5626      | 567.2849         | A    | <b>1012.5786</b> | 506.7929        | 995.5520  | 498.2796         | 994.5680       | 497.7876         | 10 |
| 13 | <b>1222.6103</b> | 611.8088        | 1205.5837 | 603.2955         | 1204.5997      | 602.8035         | A    | <b>941.5415</b>  | 471.2744        | 924.5149  | 462.7611         | 923.5309       | 462.2691         | 9  |
| 14 | <b>1335.6943</b> | 668.3508        | 1318.6678 | 659.8375         | 1317.6838      | 659.3455         | L    | <b>870.5043</b>  | 435.7558        | 853.4778  | 427.2425         | 852.4938       | 426.7505         | 8  |
| 15 | 1432.7471        | 716.8772        | 1415.7205 | 708.3639         | 1414.7365      | 707.8719         | P    | <b>757.4203</b>  | 379.2138        | 740.3937  | 370.7005         | 739.4097       | 370.2085         | 7  |
| 16 | 1533.7948        | 767.4010        | 1516.7682 | 758.8878         | 1515.7842      | 758.3957         | T    | 660.3675         | 330.6874        | 643.3410  | 322.1741         | 642.3570       | 321.6821         | 6  |
| 17 | 1662.8374        | 831.9223        | 1645.8108 | 823.4090         | 1644.8268      | 822.9170         | E    | 559.3198         | 280.1636        | 542.2933  | 271.6503         | 541.3093       | 271.1583         | 5  |
| 18 | 1733.8745        | 867.4409        | 1716.8479 | 858.9276         | 1715.8639      | 858.4356         | A    | <b>430.2772</b>  | 215.6423        | 413.2507  | 207.1290         |                |                  | 4  |
| 19 | <b>1804.9116</b> | 902.9594        | 1787.8850 | 894.4462         | 1786.9010      | 893.9542         | A    | <b>359.2401</b>  | 180.1237        | 342.2136  | 171.6104         |                |                  | 3  |
| 20 | <b>1917.9957</b> | 959.5015        | 1900.9691 | 950.9882         | 1899.9851      | 950.4962         | L    | 288.2030         | 144.6051        | 271.1765  | 136.0919         |                |                  | 2  |
| 21 |                  |                 |           |                  |                |                  | R    | 175.1190         | 88.0631         | 158.0924  | 79.5498          |                |                  | 1  |

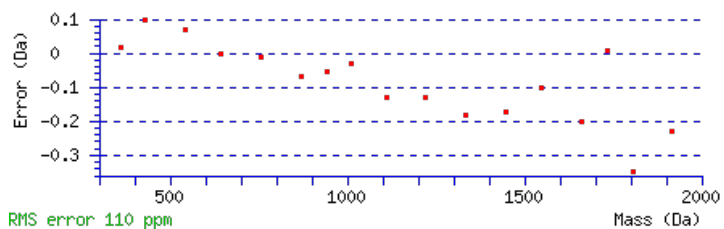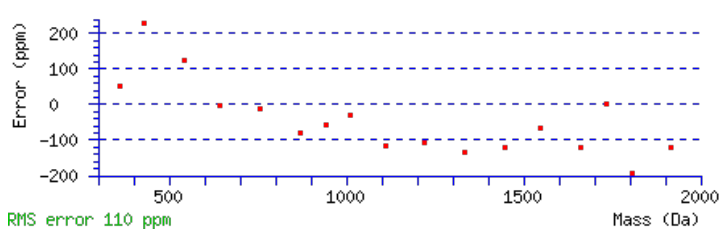

NCBI **BLAST** search of [GFGVAIVGNYTAALPTEAALR](#)  
 (Parameters: blastp, nr protein database, expect=20000, no filter, PAM30)  
 Other BLAST [web gateways](#)

**All matches to this query**

| Score | Mr(calc)  | Delta   | Sequence                              |
|-------|-----------|---------|---------------------------------------|
| 110.9 | 2091.1000 | 0.0086  | <a href="#">GFGVAIVGNYTAALPTEAALR</a> |
| 17.4  | 2091.1000 | 0.0087  | <a href="#">EWEEYVQIRTLVEKIR</a>      |
| 13.3  | 2091.1142 | -0.0055 | <a href="#">VQIVGEMMSVMKNVVAIVK</a>   |
| 11.3  | 2091.1001 | 0.0086  | <a href="#">GAVAVFVTPIGDGEYEAIR</a>   |
| 9.4   | 2091.1187 | -0.0100 | <a href="#">GFQHTGIYSVMIQKILR</a>     |
| 7.2   | 2091.1142 | -0.0055 | <a href="#">VQIVGEMMSVMKNVVAIVK</a>   |
| 6.7   | 2091.1142 | -0.0055 | <a href="#">VQIVGEMMSVMKNVVAIVK</a>   |
| 5.7   | 2091.1142 | -0.0055 | <a href="#">VQIVGEMMSVMKNVVAIVK</a>   |
| 5.7   | 2091.1142 | -0.0055 | <a href="#">VQIVGEMMSVMKNVVAIVK</a>   |
| 5.0   | 2090.1021 | 1.0066  | <a href="#">NTLLNGAAIFFPNRQTRR</a>    |

Mascot: <http://www.matrixscience.com/>

# MASCOT SCIENCE Mascot Search Results

## Peptide View

MS/MS Fragmentation of **LEPVHLQLQCMSQEQLAQVAANATK**

Found in **Q96PD5** in **con\_Xuniprot\_HUMAN3**, PGRP2\_HUMAN N-acetylmuramoyl-L-alanine amidase OS=Homo sapiens GN=PLYR2 PE=1 SV=1

Match to Query 25599: 2807.406828 from(1404.710690,2+) intensity(0.0000) rtinseconds(1928) scans(4950) index(9635)

Title: 111019\_Est\_ISCardio\_NMI\_YS\_G\_5Spectrum4248\_scans\_4950

Data file C:\mascot\20140703\_Tmgf\_1D\CSV\_UseAnalysis\MasterCSV\All\_Glyco\mgf\ptm\UC18ERLIC\_PTM\_35D.mgf

Click mouse within plot area to zoom in by factor of two about that point

Or, to Da

Label all possible matches Label matches used for scoring

Show Y-axis

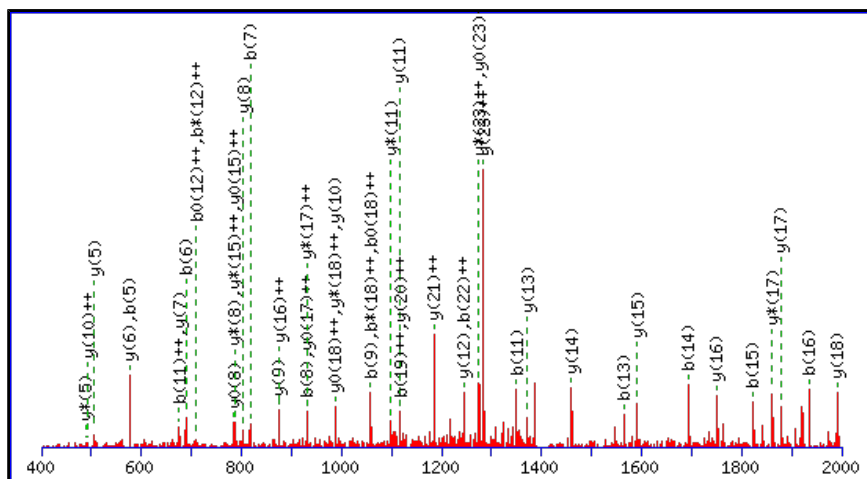

Monoisotopic mass of neutral peptide Mr(calc): 2807.3946

Fixed modifications: Carbamidomethyl (C) (apply to specified residues or termini only)

Variable modifications:

N22 : Deamidated (NQ)

Ions Score: 88 Expect: 4.6e-007

Matches : 49/272 fragment ions using 64 most intense peaks ([help](#))

| #  | b                | b <sup>++</sup>  | b <sup>*</sup> | b <sup>*++</sup> | b <sup>0</sup> | b <sup>0++</sup> | Seq. | y                | y <sup>++</sup>  | y <sup>*</sup>   | y <sup>*++</sup> | y <sup>0</sup>  | y <sup>0++</sup> | #  |
|----|------------------|------------------|----------------|------------------|----------------|------------------|------|------------------|------------------|------------------|------------------|-----------------|------------------|----|
| 1  | 114.0913         | 57.5493          |                |                  |                |                  | L    |                  |                  |                  |                  |                 |                  | 25 |
| 2  | 243.1339         | 122.0706         |                |                  | 225.1234       | 113.0653         | E    | 2695.3178        | 1348.1625        | 2678.2913        | 1339.6493        | 2677.3073       | 1339.1573        | 24 |
| 3  | 340.1867         | 170.5970         |                |                  | 322.1761       | 161.5917         | P    | 2566.2752        | <b>1283.6412</b> | 2549.2487        | <b>1275.1280</b> | 2548.2647       | <b>1274.6360</b> | 23 |
| 4  | 439.2551         | 220.1312         |                |                  | 421.2445       | 211.1259         | V    | 2469.2225        | 1235.1149        | 2452.1959        | 1226.6016        | 2451.2119       | 1226.1096        | 22 |
| 5  | <b>576.3140</b>  | 288.6606         |                |                  | 558.3035       | 279.6554         | H    | 2370.1540        | <b>1185.5807</b> | 2353.1275        | 1177.0674        | 2352.1435       | 1176.5754        | 21 |
| 6  | <b>689.3981</b>  | 345.2027         |                |                  | 671.3875       | 336.1974         | L    | 2233.0951        | <b>1117.0512</b> | 2216.0686        | 1108.5379        | 2215.0846       | 1108.0459        | 20 |
| 7  | <b>817.4567</b>  | 409.2320         | 800.4301       | 400.7187         | 799.4461       | 400.2267         | Q    | 2120.0111        | 1060.5092        | 2102.9845        | 1051.9959        | 2102.0005       | 1051.5039        | 19 |
| 8  | <b>930.5407</b>  | 465.7740         | 913.5142       | 457.2607         | 912.5302       | 456.7687         | L    | <b>1991.9525</b> | 996.4799         | 1974.9259        | <b>987.9666</b>  | 1973.9419       | <b>987.4746</b>  | 18 |
| 9  | <b>1058.5993</b> | 529.8033         | 1041.5728      | 521.2900         | 1040.5887      | 520.7980         | Q    | <b>1878.8684</b> | 939.9379         | <b>1861.8419</b> | <b>931.4246</b>  | 1860.8579       | <b>930.9326</b>  | 17 |
| 10 | 1218.6300        | 609.8186         | 1201.6034      | 601.3053         | 1200.6194      | 600.8133         | C    | <b>1750.8098</b> | <b>875.9086</b>  | 1733.7833        | 867.3953         | 1732.7993       | 866.9033         | 16 |
| 11 | <b>1349.6704</b> | <b>675.3389</b>  | 1332.6439      | 666.8256         | 1331.6599      | 666.3336         | M    | <b>1590.7792</b> | 795.8932         | 1573.7527        | <b>787.3800</b>  | 1572.7686       | <b>786.8880</b>  | 15 |
| 12 | 1436.7025        | 718.8549         | 1419.6759      | <b>710.3416</b>  | 1418.6919      | <b>709.8496</b>  | S    | <b>1459.7387</b> | 730.3730         | 1442.7122        | 721.8597         | 1441.7282       | 721.3677         | 14 |
| 13 | <b>1564.7610</b> | 782.8842         | 1547.7345      | 774.3709         | 1546.7505      | 773.8789         | Q    | <b>1372.7067</b> | 686.8570         | 1355.6801        | 678.3437         | 1354.6961       | 677.8517         | 13 |
| 14 | <b>1693.8036</b> | 847.4055         | 1676.7771      | 838.8922         | 1675.7931      | 838.4002         | E    | <b>1244.6481</b> | 622.8277         | 1227.6216        | 614.3144         | 1226.6375       | 613.8224         | 12 |
| 15 | <b>1821.8622</b> | 911.4347         | 1804.8357      | 902.9215         | 1803.8517      | 902.4295         | Q    | <b>1115.6055</b> | 558.3064         | <b>1098.5790</b> | 549.7931         | 1097.5950       | 549.3011         | 11 |
| 16 | <b>1934.9463</b> | 967.9768         | 1917.9197      | 959.4635         | 1916.9357      | 958.9715         | L    | <b>987.5469</b>  | <b>494.2771</b>  | 970.5204         | 485.7638         | 969.5364        | 485.2718         | 10 |
| 17 | 2005.9834        | 1003.4953        | 1988.9568      | 994.9821         | 1987.9728      | 994.4901         | A    | <b>874.4629</b>  | 437.7351         | 857.4363         | 429.2218         | 856.4523        | 428.7298         | 9  |
| 18 | 2134.0420        | 1067.5246        | 2117.0154      | <b>1059.0114</b> | 2116.0314      | <b>1058.5193</b> | Q    | <b>803.4258</b>  | 402.2165         | <b>786.3992</b>  | 393.7032         | <b>785.4152</b> | 393.2112         | 8  |
| 19 | 2233.1104        | <b>1117.0588</b> | 2216.0838      | 1108.5456        | 2215.0998      | 1108.0535        | V    | <b>675.3672</b>  | 338.1872         | 658.3406         | 329.6740         | 657.3566        | 329.1819         | 7  |
| 20 | 2304.1475        | 1152.5774        | 2287.1210      | 1144.0641        | 2286.1369      | 1143.5721        | A    | <b>576.2988</b>  | 288.6530         | 559.2722         | 280.1397         | 558.2882        | 279.6477         | 6  |
| 21 | 2375.1846        | 1188.0959        | 2358.1581      | 1179.5827        | 2357.1741      | 1179.0907        | A    | <b>505.2617</b>  | 253.1345         | <b>488.2351</b>  | 244.6212         | 487.2511        | 244.1292         | 5  |
| 22 | 2490.2116        | <b>1245.6094</b> | 2473.1850      | 1237.0961        | 2472.2010      | 1236.6041        | N    | 434.2245         | 217.6159         | 417.1980         | 209.1026         | 416.2140        | 208.6106         | 4  |



|    |           |           |           |           |           |           |   |          |          |          |          |          |          |   |
|----|-----------|-----------|-----------|-----------|-----------|-----------|---|----------|----------|----------|----------|----------|----------|---|
| 23 | 2561.2487 | 1281.1280 | 2544.2221 | 1272.6147 | 2543.2381 | 1272.1227 | A | 319.1976 | 160.1024 | 302.1710 | 151.5892 | 301.1870 | 151.0972 | 3 |
| 24 | 2662.2964 | 1331.6518 | 2645.2698 | 1323.1385 | 2644.2858 | 1322.6465 | T | 248.1605 | 124.5839 | 231.1339 | 116.0706 | 230.1499 | 115.5786 | 2 |
| 25 |           |           |           |           |           |           | K | 147.1128 | 74.0600  | 130.0863 | 65.5468  |          |          | 1 |

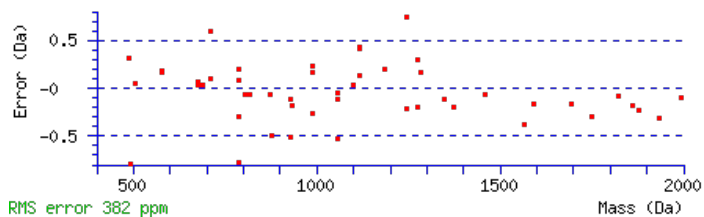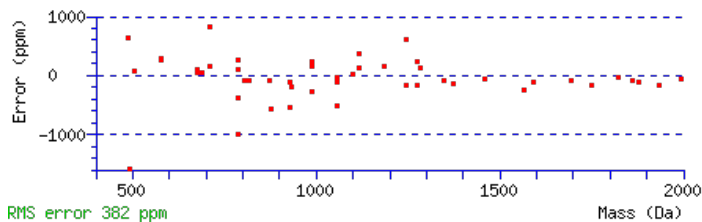

NCBI BLAST search of [LEPVHLQLQCMSQEQLAQVAANATK](#)  
 (Parameters: blastp, nr protein database, expect=20000, no filter, PAM30)  
 Other BLAST [web gateways](#)

All matches to this query

| Score | Mr(calc)  | Delta   | Sequence                                   | Site Analysis         |
|-------|-----------|---------|--------------------------------------------|-----------------------|
| 87.8  | 2807.3946 | 0.0123  | <a href="#">LEPVHLQLQCMSQEQLAQVAANATK</a>  | Deamidated N22 98.34% |
| 70.0  | 2807.3946 | 0.0123  | <a href="#">LEPVHLQLQCMSQEQLAQVAANATK</a>  | Deamidated Q18 1.65%  |
| 46.4  | 2807.3946 | 0.0123  | <a href="#">LEPVHLQLQCMSQEQLAQVAANATK</a>  | Deamidated Q15 0.01%  |
| 42.9  | 2806.4106 | 0.9963  | <a href="#">LEPVHLQLQCMSQEQLAQVAANATK</a>  |                       |
| 38.4  | 2807.3946 | 0.0123  | <a href="#">LEPVHLQLQCMSQEQLAQVAANATK</a>  | Deamidated Q13 0.00%  |
| 29.0  | 2807.3946 | 0.0123  | <a href="#">LEPVHLQLQCMSQEQLAQVAANATK</a>  | Deamidated Q9 0.00%   |
| 25.3  | 2807.3946 | 0.0123  | <a href="#">LEPVHLQLQCMSQEQLAQVAANATK</a>  | Deamidated Q7 0.00%   |
| 11.2  | 2807.4044 | 0.0024  | <a href="#">EIPSDMKGINVATSLRSALTMELNGK</a> |                       |
| 8.9   | 2807.4044 | 0.0024  | <a href="#">EIPSDMKGINVATSLRSALTMELNGK</a> |                       |
| 8.2   | 2807.4164 | -0.0095 | <a href="#">KGQLVYGQLMEPVNRENFTQTLPK</a>   |                       |

Mascot: <http://www.matrixscience.com/>

# MATRIX SCIENCE Mascot Search Results

## Peptide View

MS/MS Fragmentation of **LEPVHLQLQCMSQEQLAQVAANATK**

Found in **Q96PD5** in **con\_Xuniprot\_HUMAN3**, PGRP2\_HUMAN N-acetylmuramoyl-L-alanine amidase OS=Homo sapiens GN=PGLYRP2 PE=1 SV=1

Match to Query 25709: 2823.387462 from(942.136430,3+) intensity(10599.6465) rtinseconds(1688) scans(3981) index(11820)

Title: 111019\_Est\_ISCardio\_NMI\_YS\_G\_8Spectrum3402\_scans\_3981

Data file C:\mascot\20140703\_Tmgf\_1D\CSV\_UseAnalysis\MasterCSV\All\_Glyco\mgf\ptm\UC18ERLIC\_PTM\_35D.mgf

Click mouse within plot area to zoom in by factor of two about that point

Or, to Da

Label all possible matches Label matches used for scoring

Show Y-axis

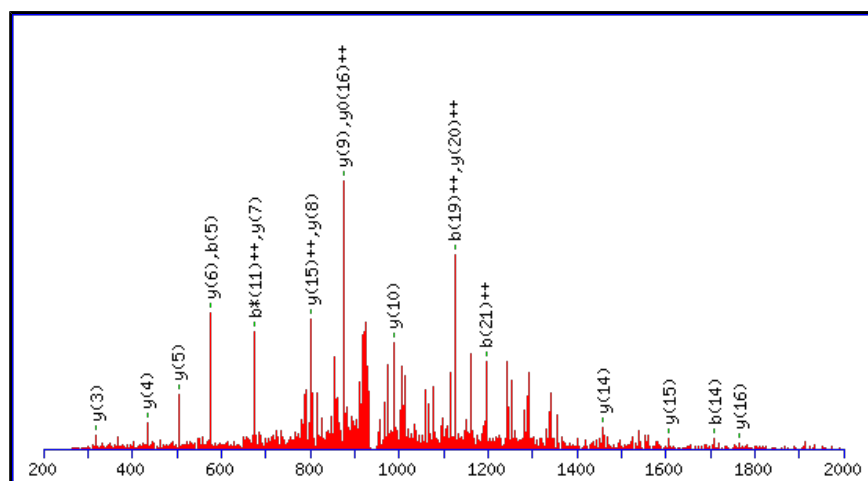

Monoisotopic mass of neutral peptide Mr(calc): 2823.3895

Fixed modifications: Carbamidomethyl (C) (apply to specified residues or termini only)

Variable modifications:

M11 : Oxidation (M), with neutral losses 0.0000(shown in table), 63.9983

N22 : Deamidated (NQ)

Ions Score: 81 Expect: 2e-006

Matches : 19/416 fragment ions using 18 most intense peaks ([help](#))

| #  | b                | b <sup>++</sup>  | b <sup>*</sup> | b <sup>*++</sup> | b <sup>0</sup> | b <sup>0++</sup> | Seq. | y                | y <sup>++</sup>  | y <sup>*</sup> | y <sup>*++</sup> | y <sup>0</sup> | y <sup>0++</sup> | #  |
|----|------------------|------------------|----------------|------------------|----------------|------------------|------|------------------|------------------|----------------|------------------|----------------|------------------|----|
| 1  | 114.0913         | 57.5493          |                |                  |                |                  | L    |                  |                  |                |                  |                |                  | 25 |
| 2  | 243.1339         | 122.0706         |                |                  | 225.1234       | 113.0653         | E    | 2711.3127        | 1356.1600        | 2694.2862      | 1347.6467        | 2693.3022      | 1347.1547        | 24 |
| 3  | 340.1867         | 170.5970         |                |                  | 322.1761       | 161.5917         | P    | 2582.2701        | 1291.6387        | 2565.2436      | 1283.1254        | 2564.2596      | 1282.6334        | 23 |
| 4  | 439.2551         | 220.1312         |                |                  | 421.2445       | 211.1259         | V    | 2485.2174        | 1243.1123        | 2468.1908      | 1234.5991        | 2467.2068      | 1234.1070        | 22 |
| 5  | <b>576.3140</b>  | 288.6606         |                |                  | 558.3035       | 279.6554         | H    | 2386.1490        | 1193.5781        | 2369.1224      | 1185.0648        | 2368.1384      | 1184.5728        | 21 |
| 6  | 689.3981         | 345.2027         |                |                  | 671.3875       | 336.1974         | L    | 2249.0900        | <b>1125.0487</b> | 2232.0635      | 1116.5354        | 2231.0795      | 1116.0434        | 20 |
| 7  | 817.4567         | 409.2320         | 800.4301       | 400.7187         | 799.4461       | 400.2267         | Q    | 2136.0060        | 1068.5066        | 2118.9794      | 1059.9934        | 2117.9954      | 1059.5013        | 19 |
| 8  | 930.5407         | 465.7740         | 913.5142       | 457.2607         | 912.5302       | 456.7687         | L    | 2007.9474        | 1004.4773        | 1990.9209      | 995.9641         | 1989.9368      | 995.4721         | 18 |
| 9  | 1058.5993        | 529.8033         | 1041.5728      | 521.2900         | 1040.5887      | 520.7980         | Q    | 1894.8633        | 947.9353         | 1877.8368      | 939.4220         | 1876.8528      | 938.9300         | 17 |
| 10 | 1218.6300        | 609.8186         | 1201.6034      | 601.3053         | 1200.6194      | 600.8133         | C    | <b>1766.8048</b> | 883.9060         | 1749.7782      | 875.3927         | 1748.7942      | <b>874.9007</b>  | 16 |
| 11 | 1365.6654        | 683.3363         | 1348.6388      | <b>674.8230</b>  | 1347.6548      | 674.3310         | M    | <b>1606.7741</b> | <b>803.8907</b>  | 1589.7476      | 795.3774         | 1588.7636      | 794.8854         | 15 |
| 12 | 1452.6974        | 726.8523         | 1435.6708      | 718.3391         | 1434.6868      | 717.8470         | S    | <b>1459.7387</b> | 730.3730         | 1442.7122      | 721.8597         | 1441.7282      | 721.3677         | 14 |
| 13 | 1580.7560        | 790.8816         | 1563.7294      | 782.3683         | 1562.7454      | 781.8763         | Q    | 1372.7067        | 686.8570         | 1355.6801      | 678.3437         | 1354.6961      | 677.8517         | 13 |
| 14 | <b>1709.7986</b> | 855.4029         | 1692.7720      | 846.8896         | 1691.7880      | 846.3976         | E    | 1244.6481        | 622.8277         | 1227.6216      | 614.3144         | 1226.6375      | 613.8224         | 12 |
| 15 | 1837.8571        | 919.4322         | 1820.8306      | 910.9189         | 1819.8466      | 910.4269         | Q    | 1115.6055        | 558.3064         | 1098.5790      | 549.7931         | 1097.5950      | 549.3011         | 11 |
| 16 | 1950.9412        | 975.9742         | 1933.9146      | 967.4610         | 1932.9306      | 966.9690         | L    | <b>987.5469</b>  | 494.2771         | 970.5204       | 485.7638         | 969.5364       | 485.2718         | 10 |
| 17 | 2021.9783        | 1011.4928        | 2004.9518      | 1002.9795        | 2003.9677      | 1002.4875        | A    | <b>874.4629</b>  | 437.7351         | 857.4363       | 429.2218         | 856.4523       | 428.7298         | 9  |
| 18 | 2150.0369        | 1075.5221        | 2133.0103      | 1067.0088        | 2132.0263      | 1066.5168        | Q    | <b>803.4258</b>  | 402.2165         | 786.3992       | 393.7032         | 785.4152       | 393.2112         | 8  |
| 19 | 2249.1053        | <b>1125.0563</b> | 2232.0788      | 1116.5430        | 2231.0947      | 1116.0510        | V    | <b>675.3672</b>  | 338.1872         | 658.3406       | 329.6740         | 657.3566       | 329.1819         | 7  |
| 20 | 2320.1424        | 1160.5748        | 2303.1159      | 1152.0616        | 2302.1319      | 1151.5696        | A    | <b>576.2988</b>  | 288.6530         | 559.2722       | 280.1397         | 558.2882       | 279.6477         | 6  |
| 21 | 2391.1795        | <b>1196.0934</b> | 2374.1530      | 1187.5801        | 2373.1690      | 1187.0881        | A    | <b>505.2617</b>  | 253.1345         | 488.2351       | 244.6212         | 487.2511       | 244.1292         | 5  |

|    |           |           |           |           |           |           |   |          |          |          |          |          |          |   |
|----|-----------|-----------|-----------|-----------|-----------|-----------|---|----------|----------|----------|----------|----------|----------|---|
| 22 | 2506.2065 | 1253.6069 | 2489.1799 | 1245.0936 | 2488.1959 | 1244.6016 | N | 434.2245 | 217.6159 | 417.1980 | 209.1026 | 416.2140 | 208.6106 | 4 |
| 23 | 2577.2436 | 1289.1254 | 2560.2170 | 1280.6122 | 2559.2330 | 1280.1201 | A | 319.1976 | 160.1024 | 302.1710 | 151.5892 | 301.1870 | 151.0972 | 3 |
| 24 | 2678.2913 | 1339.6493 | 2661.2647 | 1331.1360 | 2660.2807 | 1330.6440 | T | 248.1605 | 124.5839 | 231.1339 | 116.0706 | 230.1499 | 115.5786 | 2 |
| 25 |           |           |           |           |           |           | K | 147.1128 | 74.0600  | 130.0863 | 65.5468  |          |          | 1 |

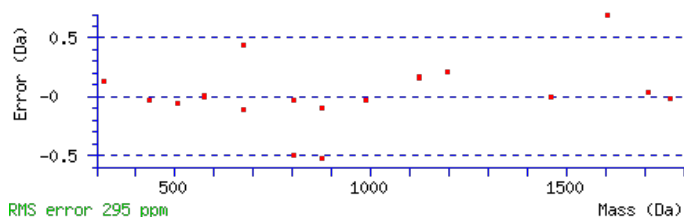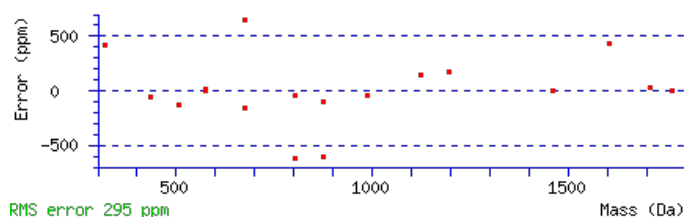

NCBI BLAST search of [LEPVHLQLQCMSQEQLAQVAANATK](#)

(Parameters: blastp, nr protein database, expect=20000, no filter, PAM30)

Other BLAST [web gateways](#)

All matches to this query

| Score | Mr(calc)  | Delta   | Sequence                                     | Site Analysis         |
|-------|-----------|---------|----------------------------------------------|-----------------------|
| 81.4  | 2823.3895 | -0.0020 | <a href="#">LEPVHLQLQCMSQEQLAQVAANATK</a>    | Deamidated N22 98.33% |
| 59.9  | 2823.3895 | -0.0020 | <a href="#">LEPVHLQLQCMSQEQLAQVAANATK</a>    | Deamidated Q15 0.70%  |
| 59.3  | 2823.3895 | -0.0020 | <a href="#">LEPVHLQLQCMSQEQLAQVAANATK</a>    | Deamidated Q18 0.60%  |
| 56.8  | 2823.3895 | -0.0020 | <a href="#">LEPVHLQLQCMSQEQLAQVAANATK</a>    | Deamidated Q13 0.34%  |
| 42.7  | 2823.3895 | -0.0020 | <a href="#">LEPVHLQLQCMSQEQLAQVAANATK</a>    | Deamidated Q9 0.01%   |
| 39.4  | 2823.3895 | -0.0020 | <a href="#">LEPVHLQLQCMSQEQLAQVAANATK</a>    | Deamidated Q7 0.01%   |
| 5.3   | 2823.3821 | 0.0054  | <a href="#">LLDQTQNVHTVLLGNDSNQGLGNMNK</a>   |                       |
| 5.3   | 2823.3821 | 0.0054  | <a href="#">LLDQTQNVHTVLLGNDSNQGLGNMNK</a>   |                       |
| 5.2   | 2823.3861 | 0.0013  | <a href="#">IEPAPLAQFAPQRSTTELSSHQPTSM</a>   |                       |
| 2.6   | 2822.3794 | 1.0080  | <a href="#">GROEKTTAPSGGSAPPEQALPQESATAR</a> |                       |

Mascot: <http://www.matrixscience.com/>

# MASCOT SCIENCE Mascot Search Results

## Peptide View

MS/MS Fragmentation of **LYHFLLGAWSLNATELDPCPLSPELLGLTK**

Found in **M0QYW3** in **con\_Xuniprot\_HUMAN3**, M0QYW3\_HUMAN N-acetylmuramoyl-L-alanine amidase (Fragment) OS=Homo sapiens  
GN=PGLYRP2 PE=2 SV=1

Match to Query 27548: 3368.743092 from(1123.921640,3+) intensity(18209.6191) rtinseconds(2753) scans(7060) index(14251)

Title: 111019\_Est\_MI\_YP\_G\_02Spectrum6182\_scans\_7060

Data file C:\mascot\20140703\_Tmgf\_1D\CSV\_UseAnalysis\MasterCSV\All\_Glyco\mgf\ptm\UC18ERLIC\_PTM\_35D.mgf

Click mouse within plot area to zoom in by factor of two about that point

Or, to Da

Label all possible matches Label matches used for scoring

Show Y-axis

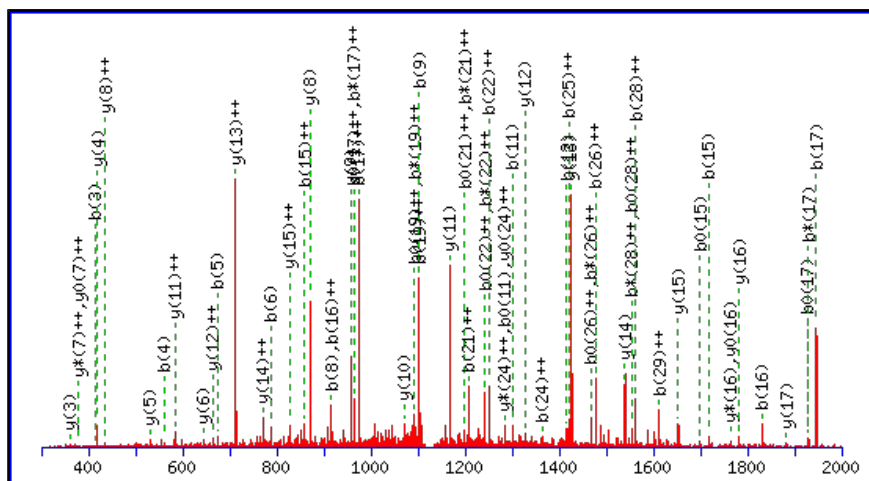

Monoisotopic mass of neutral peptide Mr(calc): 3368.7366

Fixed modifications: Carbamidomethyl (C) (apply to specified residues or termini only)

Variable modifications:

N12 : Deamidated (NQ)

Ions Score: 73 Expect: 9.3e-006

Matches : 64/306 fragment ions using 119 most intense peaks ([help](#))

| #  | b                | b <sup>++</sup>  | b <sup>*</sup>   | b <sup>***</sup> | b <sup>0</sup>   | b <sup>0++</sup> | Seq. | y                | y <sup>++</sup> | y <sup>*</sup>   | y <sup>***</sup> | y <sup>0</sup>   | y <sup>0++</sup> | #  |
|----|------------------|------------------|------------------|------------------|------------------|------------------|------|------------------|-----------------|------------------|------------------|------------------|------------------|----|
| 1  | 114.0913         | 57.5493          |                  |                  |                  |                  | L    |                  |                 |                  |                  |                  |                  | 30 |
| 2  | 277.1547         | 139.0810         |                  |                  |                  |                  | Y    | 3256.6599        | 1628.8336       | 3239.6333        | 1620.3203        | 3238.6493        | 1619.8283        | 29 |
| 3  | <b>414.2136</b>  | 207.6104         |                  |                  |                  |                  | H    | 3093.5965        | 1547.3019       | 3076.5700        | 1538.7886        | 3075.5860        | 1538.2966        | 28 |
| 4  | <b>561.2820</b>  | 281.1446         |                  |                  |                  |                  | F    | 2956.5376        | 1478.7725       | 2939.5111        | 1470.2592        | 2938.5271        | 1469.7672        | 27 |
| 5  | <b>674.3661</b>  | 337.6867         |                  |                  |                  |                  | L    | 2809.4692        | 1405.2382       | 2792.4427        | 1396.7250        | 2791.4586        | 1396.2330        | 26 |
| 6  | <b>787.4501</b>  | 394.2287         |                  |                  |                  |                  | L    | 2696.3851        | 1348.6962       | 2679.3586        | 1340.1829        | 2678.3746        | 1339.6909        | 25 |
| 7  | 844.4716         | 422.7394         |                  |                  |                  |                  | G    | 2583.3011        | 1292.1542       | 2566.2745        | <b>1283.6409</b> | 2565.2905        | <b>1283.1489</b> | 24 |
| 8  | <b>915.5087</b>  | 458.2580         |                  |                  |                  |                  | A    | 2526.2796        | 1263.6434       | 2509.2531        | 1255.1302        | 2508.2691        | 1254.6382        | 23 |
| 9  | <b>1101.5880</b> | 551.2976         |                  |                  |                  |                  | W    | 2455.2425        | 1228.1249       | 2438.2160        | 1219.6116        | 2437.2319        | 1219.1196        | 22 |
| 10 | 1188.6200        | 594.8137         |                  |                  | 1170.6095        | 585.8084         | S    | 2269.1632        | 1135.0852       | 2252.1366        | 1126.5720        | 2251.1526        | 1126.0800        | 21 |
| 11 | <b>1301.7041</b> | 651.3557         |                  |                  | <b>1283.6935</b> | 642.3504         | L    | 2182.1312        | 1091.5692       | 2165.1046        | 1083.0559        | 2164.1206        | 1082.5639        | 20 |
| 12 | <b>1416.7310</b> | 708.8692         | 1399.7045        | 700.3559         | 1398.7205        | 699.8639         | N    | 2069.0471        | 1035.0272       | 2052.0206        | 1026.5139        | 2051.0365        | 1026.0219        | 19 |
| 13 | 1487.7682        | 744.3877         | 1470.7416        | 735.8744         | 1469.7576        | 735.3824         | A    | 1954.0202        | 977.5137        | 1936.9936        | 969.0004         | 1936.0096        | 968.5084         | 18 |
| 14 | 1588.8158        | 794.9116         | 1571.7893        | 786.3983         | 1570.8053        | 785.9063         | T    | <b>1882.9830</b> | 941.9952        | 1865.9565        | 933.4819         | 1864.9725        | 932.9899         | 17 |
| 15 | <b>1717.8584</b> | <b>859.4329</b>  | 1700.8319        | 850.9196         | <b>1699.8479</b> | 850.4276         | E    | <b>1781.9354</b> | 891.4713        | <b>1764.9088</b> | 882.9580         | <b>1763.9248</b> | 882.4660         | 16 |
| 16 | <b>1830.9425</b> | <b>915.9749</b>  | 1813.9160        | 907.4616         | 1812.9319        | 906.9696         | L    | <b>1652.8928</b> | <b>826.9500</b> | 1635.8662        | 818.4367         | 1634.8822        | 817.9447         | 15 |
| 17 | <b>1945.9694</b> | <b>973.4884</b>  | <b>1928.9429</b> | <b>964.9751</b>  | <b>1927.9589</b> | <b>964.4831</b>  | D    | <b>1539.8087</b> | <b>770.4080</b> | 1522.7822        | 761.8947         | 1521.7981        | 761.4027         | 14 |
| 18 | 2043.0222        | 1022.0147        | 2025.9957        | 1013.5015        | 2025.0116        | 1013.0095        | P    | <b>1424.7818</b> | <b>712.8945</b> | 1407.7552        | 704.3812         | 1406.7712        | 703.8892         | 13 |
| 19 | 2203.0529        | <b>1102.0301</b> | 2186.0263        | <b>1093.5168</b> | 2185.0423        | <b>1093.0248</b> | C    | <b>1327.7290</b> | <b>664.3681</b> | 1310.7025        | 655.8549         | 1309.7184        | 655.3629         | 12 |
| 20 | 2300.1056        | 1150.5564        | 2283.0791        | 1142.0432        | 2282.0951        | 1141.5512        | P    | <b>1167.6984</b> | <b>584.3528</b> | 1150.6718        | 575.8395         | 1149.6878        | 575.3475         | 11 |
| 21 | 2413.1897        | <b>1207.0985</b> | 2396.1631        | <b>1198.5852</b> | 2395.1791        | <b>1198.0932</b> | L    | <b>1070.6456</b> | 535.8264        | 1053.6190        | 527.3132         | 1052.6350        | 526.8211         | 10 |
| 22 | 2500.2217        | <b>1250.6145</b> | 2483.1952        | <b>1242.1012</b> | 2482.2111        | <b>1241.6092</b> | S    | <b>957.5615</b>  | 479.2844        | 940.5350         | 470.7711         | 939.5510         | 470.2791         | 9  |

|    |           |           |           |           |           |           |   |          |          |          |          |          |          |   |
|----|-----------|-----------|-----------|-----------|-----------|-----------|---|----------|----------|----------|----------|----------|----------|---|
| 23 | 2597.2745 | 1299.1409 | 2580.2479 | 1290.6276 | 2579.2639 | 1290.1356 | P | 870.5295 | 435.7684 | 853.5029 | 427.2551 | 852.5189 | 426.7631 | 8 |
| 24 | 2726.3171 | 1363.6622 | 2709.2905 | 1355.1489 | 2708.3065 | 1354.6569 | E | 773.4767 | 387.2420 | 756.4502 | 378.7287 | 755.4662 | 378.2367 | 7 |
| 25 | 2839.4011 | 1420.2042 | 2822.3746 | 1411.6909 | 2821.3906 | 1411.1989 | L | 644.4341 | 322.7207 | 627.4076 | 314.2074 | 626.4236 | 313.7154 | 6 |
| 26 | 2952.4852 | 1476.7462 | 2935.4586 | 1468.2330 | 2934.4746 | 1467.7410 | L | 531.3501 | 266.1787 | 514.3235 | 257.6654 | 513.3395 | 257.1734 | 5 |
| 27 | 3009.5067 | 1505.2570 | 2992.4801 | 1496.7437 | 2991.4961 | 1496.2517 | G | 418.2660 | 209.6366 | 401.2395 | 201.1234 | 400.2554 | 200.6314 | 4 |
| 28 | 3122.5907 | 1561.7990 | 3105.5642 | 1553.2857 | 3104.5802 | 1552.7937 | L | 361.2445 | 181.1259 | 344.2180 | 172.6126 | 343.2340 | 172.1206 | 3 |
| 29 | 3223.6384 | 1612.3228 | 3206.6119 | 1603.8096 | 3205.6278 | 1603.3176 | T | 248.1605 | 124.5839 | 231.1339 | 116.0706 | 230.1499 | 115.5786 | 2 |
| 30 |           |           |           |           |           |           | K | 147.1128 | 74.0600  | 130.0863 | 65.5468  |          |          | 1 |

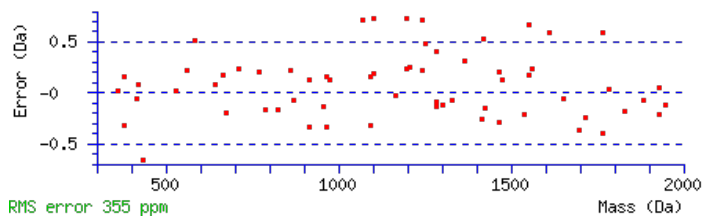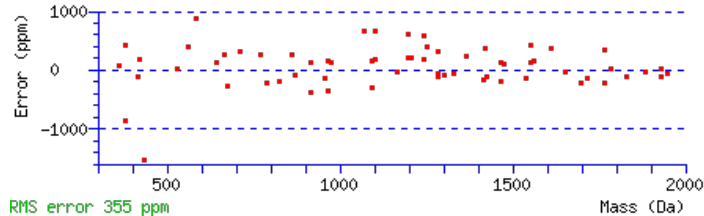

NCBI BLAST search of [LYHELLGAWSLNATELDPCLSPELLGLTK](#)  
 (Parameters: blastp, nr protein database, expect=20000, no filter, PAM30)  
 Other BLAST [web gateways](#)

All matches to this query

| Score | Mr(calc)  | Delta   | Sequence                                        |
|-------|-----------|---------|-------------------------------------------------|
| 72.6  | 3368.7366 | 0.0065  | <a href="#">LYHELLGAWSLNATELDPCLSPELLGLTK</a>   |
| 52.3  | 3367.7526 | 0.9905  | <a href="#">LYHELLGAWSLNATELDPCLSPELLGLTK</a>   |
| 14.0  | 3368.7472 | -0.0041 | <a href="#">DLMQVLATFCTEINVNFRASTEVLNKK</a>     |
| 7.7   | 3367.7302 | 1.0129  | <a href="#">KPIALIAVSEKGSMLQVNMVSGHSSAPPK</a>   |
| 5.7   | 3366.7223 | 2.0208  | <a href="#">THTYFNPLWYSQKFLAVKQMHSlier</a>      |
| 5.2   | 3366.7349 | 2.0082  | <a href="#">ILGTTVKLMELKPNTCYCLSVRAANTAGVGK</a> |
| 5.1   | 3367.7372 | 1.0059  | <a href="#">QRQDDLDTLGLGLOGGIPNGYLVDLSVQGGR</a> |
| 4.7   | 3367.7372 | 1.0059  | <a href="#">QRQDDLDTLGLGLOGGIPNGYLVDLSVQGGR</a> |
| 4.7   | 3366.7307 | 2.0124  | <a href="#">IRQLAERSFEGLQLEVLTLDHNQLQEVK</a>    |
| 4.2   | 3367.7374 | 1.0057  | <a href="#">DMNPLATKIVGTKPEVSEYFQQLISYVVR</a>   |

Mascot: <http://www.matrixscience.com/>

# MASCOT SCIENCE Mascot Search Results

## Peptide View

MS/MS Fragmentation of **LEPVHLQLQCMSQEQLAQVAANATK**

Found in **Q96PD5** in **con\_Xuniprot\_HUMAN3**, PGRP2\_HUMAN N-acetylmuramoyl-L-alanine amidase OS=Homo sapiens GN=PLYR2 PE=1 SV=1

Match to Query 25612: 2808.387462 from(937.136430,3+) intensity(36048.7891) rtinseconds(2054) scans(5254) index(2164)

Title: 111019\_Est\_ISCardio\_NMI\_YP\_G\_4Spectrum4558\_scans\_5254

Data file C:\mascot\20140703\_Tmgf\_1D\CSV\_UseAnalysis\MasterCSV\All\_Glyco\mgf\ptm\UC18ERLIC\_PTM\_35D.mgf

Click mouse within plot area to zoom in by factor of two about that point

Or, to Da

Label all possible matches Label matches used for scoring

Show Y-axis

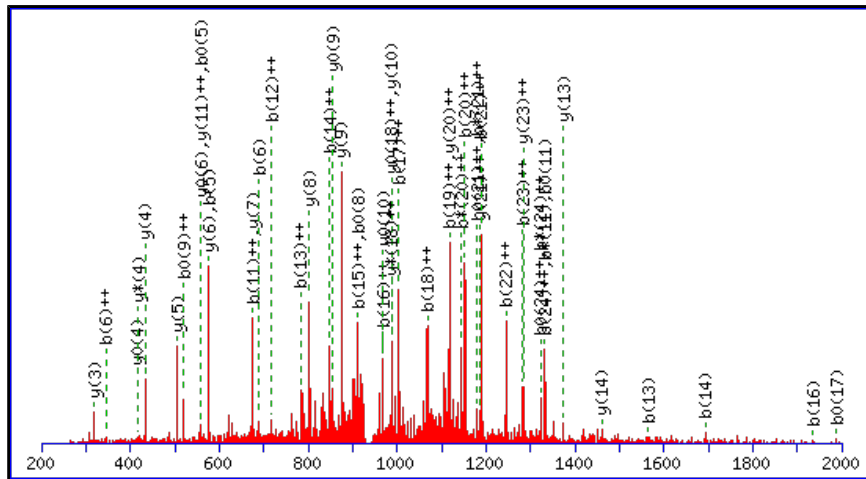

Monoisotopic mass of neutral peptide Mr(calc): 2808.3786

Fixed modifications: Carbamidomethyl (C) (apply to specified residues or termini only)

Variable modifications:

Q13 : Deamidated (NQ)

N22 : Deamidated (NQ)

Ions Score: 64 Expect: 9.6e-005

Matches : 52/272 fragment ions using 107 most intense peaks ([help](#))

| #  | b         | b <sup>++</sup> | b*        | b <sup>*++</sup> | b <sup>0</sup> | b <sup>0++</sup> | Seq. | y         | y <sup>++</sup> | y*        | y <sup>*++</sup> | y <sup>0</sup> | y <sup>0++</sup> | #  |
|----|-----------|-----------------|-----------|------------------|----------------|------------------|------|-----------|-----------------|-----------|------------------|----------------|------------------|----|
| 1  | 114.0913  | 57.5493         |           |                  |                |                  | L    |           |                 |           |                  |                |                  | 25 |
| 2  | 243.1339  | 122.0706        |           |                  | 225.1234       | 113.0653         | E    | 2696.3018 | 1348.6546       | 2679.2753 | 1340.1413        | 2678.2913      | 1339.6493        | 24 |
| 3  | 340.1867  | 170.5970        |           |                  | 322.1761       | 161.5917         | P    | 2567.2592 | 1284.1333       | 2550.2327 | 1275.6200        | 2549.2487      | 1275.1280        | 23 |
| 4  | 439.2551  | 220.1312        |           |                  | 421.2445       | 211.1259         | V    | 2470.2065 | 1235.6069       | 2453.1799 | 1227.0936        | 2452.1959      | 1226.6016        | 22 |
| 5  | 576.3140  | 288.6606        |           |                  | 558.3035       | 279.6554         | H    | 2371.1381 | 1186.0727       | 2354.1115 | 1177.5594        | 2353.1275      | 1177.0674        | 21 |
| 6  | 689.3981  | 345.2027        |           |                  | 671.3875       | 336.1974         | L    | 2234.0791 | 1117.5432       | 2217.0526 | 1109.0299        | 2216.0686      | 1108.5379        | 20 |
| 7  | 817.4567  | 409.2320        | 800.4301  | 400.7187         | 799.4461       | 400.2267         | Q    | 2120.9951 | 1061.0012       | 2103.9685 | 1052.4879        | 2102.9845      | 1051.9959        | 19 |
| 8  | 930.5407  | 465.7740        | 913.5142  | 457.2607         | 912.5302       | 456.7687         | L    | 1992.9365 | 996.9719        | 1975.9100 | 988.4586         | 1974.9259      | 987.9666         | 18 |
| 9  | 1058.5993 | 529.8033        | 1041.5728 | 521.2900         | 1040.5887      | 520.7980         | Q    | 1879.8524 | 940.4299        | 1862.8259 | 931.9166         | 1861.8419      | 931.4246         | 17 |
| 10 | 1218.6300 | 609.8186        | 1201.6034 | 601.3053         | 1200.6194      | 600.8133         | C    | 1751.7939 | 876.4006        | 1734.7673 | 867.8873         | 1733.7833      | 867.3953         | 16 |
| 11 | 1349.6704 | 675.3389        | 1332.6439 | 666.8256         | 1331.6599      | 666.3336         | M    | 1591.7632 | 796.3852        | 1574.7367 | 787.8720         | 1573.7527      | 787.3800         | 15 |
| 12 | 1436.7025 | 718.8549        | 1419.6759 | 710.3416         | 1418.6919      | 709.8496         | S    | 1460.7227 | 730.8650        | 1443.6962 | 722.3517         | 1442.7122      | 721.8597         | 14 |
| 13 | 1565.7451 | 783.3762        | 1548.7185 | 774.8629         | 1547.7345      | 774.3709         | Q    | 1373.6907 | 687.3490        | 1356.6642 | 678.8357         | 1355.6801      | 678.3437         | 13 |
| 14 | 1694.7877 | 847.8975        | 1677.7611 | 839.3842         | 1676.7771      | 838.8922         | E    | 1244.6481 | 622.8277        | 1227.6216 | 614.3144         | 1226.6375      | 613.8224         | 12 |
| 15 | 1822.8462 | 911.9268        | 1805.8197 | 903.4135         | 1804.8357      | 902.9215         | Q    | 1115.6055 | 558.3064        | 1098.5790 | 549.7931         | 1097.5950      | 549.3011         | 11 |
| 16 | 1935.9303 | 968.4688        | 1918.9037 | 959.9555         | 1917.9197      | 959.4635         | L    | 987.5469  | 494.2771        | 970.5204  | 485.7638         | 969.5364       | 485.2718         | 10 |
| 17 | 2006.9674 | 1003.9873       | 1989.9409 | 995.4741         | 1988.9568      | 994.9821         | A    | 874.4629  | 437.7351        | 857.4363  | 429.2218         | 856.4523       | 428.7298         | 9  |
| 18 | 2135.0260 | 1068.0166       | 2117.9994 | 1059.5034        | 2117.0154      | 1059.0114        | Q    | 803.4258  | 402.2165        | 786.3992  | 393.7032         | 785.4152       | 393.2112         | 8  |
| 19 | 2234.0944 | 1117.5508       | 2217.0679 | 1109.0376        | 2216.0838      | 1108.5456        | V    | 675.3672  | 338.1872        | 658.3406  | 329.6740         | 657.3566       | 329.1819         | 7  |
| 20 | 2305.1315 | 1153.0694       | 2288.1050 | 1144.5561        | 2287.1210      | 1144.0641        | A    | 576.2988  | 288.6530        | 559.2722  | 280.1397         | 558.2882       | 279.6477         | 6  |
| 21 | 2376.1686 | 1188.5880       | 2359.1421 | 1180.0747        | 2358.1581      | 1179.5827        | A    | 505.2617  | 253.1345        | 488.2351  | 244.6212         | 487.2511       | 244.1292         | 5  |

|    |           |                  |           |                  |           |                  |   |                 |          |                 |          |                 |          |   |
|----|-----------|------------------|-----------|------------------|-----------|------------------|---|-----------------|----------|-----------------|----------|-----------------|----------|---|
| 22 | 2491.1956 | <b>1246.1014</b> | 2474.1690 | 1237.5882        | 2473.1850 | 1237.0961        | N | <b>434.2245</b> | 217.6159 | <b>417.1980</b> | 209.1026 | <b>416.2140</b> | 208.6106 | 4 |
| 23 | 2562.2327 | <b>1281.6200</b> | 2545.2061 | 1273.1067        | 2544.2221 | 1272.6147        | A | <b>319.1976</b> | 160.1024 | 302.1710        | 151.5892 | 301.1870        | 151.0972 | 3 |
| 24 | 2663.2804 | <b>1332.1438</b> | 2646.2538 | <b>1323.6305</b> | 2645.2698 | <b>1323.1385</b> | T | 248.1605        | 124.5839 | 231.1339        | 116.0706 | 230.1499        | 115.5786 | 2 |
| 25 |           |                  |           |                  |           |                  | K | 147.1128        | 74.0600  | 130.0863        | 65.5468  |                 |          | 1 |

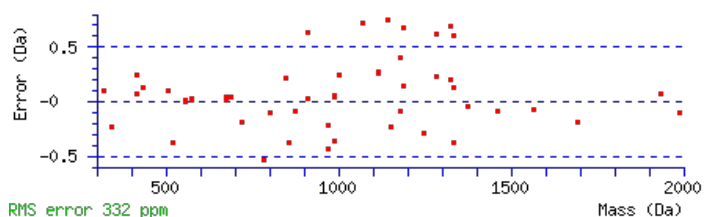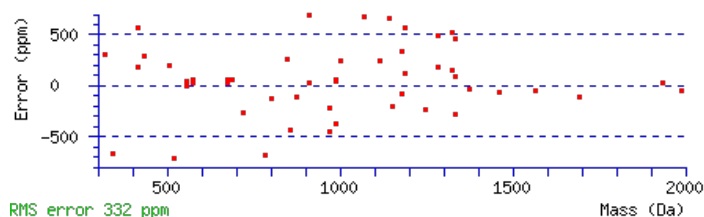

NCBI BLAST search of [LEPVHLQLQCMSQEQLAQVAANATK](#)  
 (Parameters: blastp, nr protein database, expect=20000, no filter, PAM30)  
 Other BLAST [web gateways](#)

All matches to this query

| Score | Mr(calc)  | Delta  | Sequence                                  | Site Analysis              |
|-------|-----------|--------|-------------------------------------------|----------------------------|
| 64.4  | 2808.3786 | 0.0089 | <a href="#">LEPVHLQLQCMSQEQLAQVAANATK</a> | Deamidated Q13, N22 13.49% |
| 64.4  | 2808.3786 | 0.0089 | <a href="#">LEPVHLQLQCMSQEQLAQVAANATK</a> | Deamidated Q15, N22 13.49% |
| 63.5  | 2808.3786 | 0.0089 | <a href="#">LEPVHLQLQCMSQEQLAQVAANATK</a> | Deamidated Q9, N22 11.02%  |
| 63.5  | 2808.3786 | 0.0089 | <a href="#">LEPVHLQLQCMSQEQLAQVAANATK</a> | Deamidated Q7, N22 11.02%  |
| 63.3  | 2808.3786 | 0.0089 | <a href="#">LEPVHLQLQCMSQEQLAQVAANATK</a> | Deamidated Q13, Q18 10.52% |
| 63.3  | 2808.3786 | 0.0089 | <a href="#">LEPVHLQLQCMSQEQLAQVAANATK</a> | Deamidated Q15, Q18 10.52% |
| 62.4  | 2808.3786 | 0.0089 | <a href="#">LEPVHLQLQCMSQEQLAQVAANATK</a> | Deamidated Q9, Q18 8.59%   |
| 62.4  | 2808.3786 | 0.0089 | <a href="#">LEPVHLQLQCMSQEQLAQVAANATK</a> | Deamidated Q7, Q18 8.59%   |
| 59.9  | 2808.3786 | 0.0089 | <a href="#">LEPVHLQLQCMSQEQLAQVAANATK</a> | Deamidated Q13, Q15 4.78%  |
| 55.2  | 2808.3786 | 0.0089 | <a href="#">LEPVHLQLQCMSQEQLAQVAANATK</a> | Deamidated Q18, N22 1.61%  |

Mascot: <http://www.matrixscience.com/>



# MATRIX SCIENCE Mascot Search Results

## Peptide View

MS/MS Fragmentation of **LEPVHLQLQCMSQEQLAQVAANATK**

Found in **Q96PD5** in **con\_Xuniprot\_HUMAN3**, PGRP2\_HUMAN N-acetylmuramoyl-L-alanine amidase OS=Homo sapiens GN=PLYR2 PE=1 SV=1

Match to Query 25614: 2808.391992 from(937.137940,3+) intensity(40898.8477) rtinseconds(2030) scans(5185) index(2160)

Title: 111019\_Est\_ISCardio\_NMI\_YP\_G\_4Spectrum4496\_scans\_5185

Data file C:\mascot\20140703\_Tmgf\_1D\CSV\_UseAnalysis\MasterCSV\All\_Glyco\mgf\ptm\UC18ERLIC\_PTM\_35D.mgf

Click mouse within plot area to zoom in by factor of two about that point

Or, to Da

Label all possible matches Label matches used for scoring

Show Y-axis

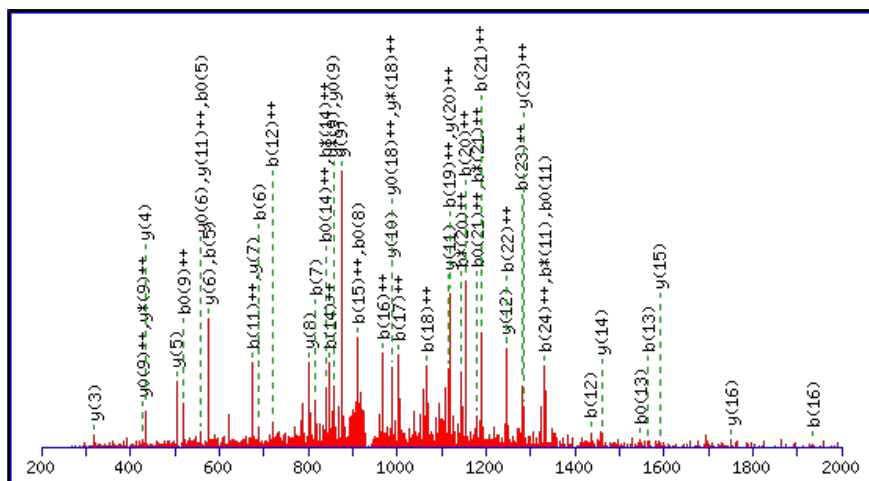

Monoisotopic mass of neutral peptide Mr(calc): 2808.3786

Fixed modifications: Carbamidomethyl (C) (apply to specified residues or termini only)

Variable modifications:

Q15 : Deamidated (NQ)

N22 : Deamidated (NQ)

Ions Score: 63 Expect: 0.00014

Matches : 53/272 fragment ions using 89 most intense peaks ([help](#))

| #  | b         | b <sup>++</sup> | b <sup>*</sup> | b <sup>*++</sup> | b <sup>0</sup> | b <sup>0++</sup> | Seq. | y         | y <sup>++</sup> | y <sup>*</sup> | y <sup>*++</sup> | y <sup>0</sup> | y <sup>0++</sup> | #  |
|----|-----------|-----------------|----------------|------------------|----------------|------------------|------|-----------|-----------------|----------------|------------------|----------------|------------------|----|
| 1  | 114.0913  | 57.5493         |                |                  |                |                  | L    |           |                 |                |                  |                |                  | 25 |
| 2  | 243.1339  | 122.0706        |                |                  | 225.1234       | 113.0653         | E    | 2696.3018 | 1348.6546       | 2679.2753      | 1340.1413        | 2678.2913      | 1339.6493        | 24 |
| 3  | 340.1867  | 170.5970        |                |                  | 322.1761       | 161.5917         | P    | 2567.2592 | 1284.1333       | 2550.2327      | 1275.6200        | 2549.2487      | 1275.1280        | 23 |
| 4  | 439.2551  | 220.1312        |                |                  | 421.2445       | 211.1259         | V    | 2470.2065 | 1235.6069       | 2453.1799      | 1227.0936        | 2452.1959      | 1226.6016        | 22 |
| 5  | 576.3140  | 288.6606        |                |                  | 558.3035       | 279.6554         | H    | 2371.1381 | 1186.0727       | 2354.1115      | 1177.5594        | 2353.1275      | 1177.0674        | 21 |
| 6  | 689.3981  | 345.2027        |                |                  | 671.3875       | 336.1974         | L    | 2234.0791 | 1117.5432       | 2217.0526      | 1109.0299        | 2216.0686      | 1108.5379        | 20 |
| 7  | 817.4567  | 409.2320        | 800.4301       | 400.7187         | 799.4461       | 400.2267         | Q    | 2120.9951 | 1061.0012       | 2103.9685      | 1052.4879        | 2102.9845      | 1051.9959        | 19 |
| 8  | 930.5407  | 465.7740        | 913.5142       | 457.2607         | 912.5302       | 456.7687         | L    | 1992.9365 | 996.9719        | 1975.9100      | 988.4586         | 1974.9259      | 987.9666         | 18 |
| 9  | 1058.5993 | 529.8033        | 1041.5728      | 521.2900         | 1040.5887      | 520.7980         | Q    | 1879.8524 | 940.4299        | 1862.8259      | 931.9166         | 1861.8419      | 931.4246         | 17 |
| 10 | 1218.6300 | 609.8186        | 1201.6034      | 601.3053         | 1200.6194      | 600.8133         | C    | 1751.7939 | 876.4006        | 1734.7673      | 867.8873         | 1733.7833      | 867.3953         | 16 |
| 11 | 1349.6704 | 675.3389        | 1332.6439      | 666.8256         | 1331.6599      | 666.3336         | M    | 1591.7632 | 796.3852        | 1574.7367      | 787.8720         | 1573.7527      | 787.3800         | 15 |
| 12 | 1436.7025 | 718.8549        | 1419.6759      | 710.3416         | 1418.6919      | 709.8496         | S    | 1460.7227 | 730.8650        | 1443.6962      | 722.3517         | 1442.7122      | 721.8597         | 14 |
| 13 | 1564.7610 | 782.8842        | 1547.7345      | 774.3709         | 1546.7505      | 773.8789         | Q    | 1373.6907 | 687.3490        | 1356.6642      | 678.8357         | 1355.6801      | 678.3437         | 13 |
| 14 | 1693.8036 | 847.4055        | 1676.7771      | 838.8922         | 1675.7931      | 838.4002         | E    | 1245.6321 | 623.3197        | 1228.6056      | 614.8064         | 1227.6216      | 614.3144         | 12 |
| 15 | 1822.8462 | 911.9268        | 1805.8197      | 903.4135         | 1804.8357      | 902.9215         | Q    | 1116.5895 | 558.7984        | 1099.5630      | 550.2851         | 1098.5790      | 549.7931         | 11 |
| 16 | 1935.9303 | 968.4688        | 1918.9037      | 959.9555         | 1917.9197      | 959.4635         | L    | 987.5469  | 494.2771        | 970.5204       | 485.7638         | 969.5364       | 485.2718         | 10 |
| 17 | 2006.9674 | 1003.9873       | 1989.9409      | 995.4741         | 1988.9568      | 994.9821         | A    | 874.4629  | 437.7351        | 857.4363       | 429.2218         | 856.4523       | 428.7298         | 9  |
| 18 | 2135.0260 | 1068.0166       | 2117.9994      | 1059.5034        | 2117.0154      | 1059.0114        | Q    | 803.4258  | 402.2165        | 786.3992       | 393.7032         | 785.4152       | 393.2112         | 8  |
| 19 | 2234.0944 | 1117.5508       | 2217.0679      | 1109.0376        | 2216.0838      | 1108.5456        | V    | 675.3672  | 338.1872        | 658.3406       | 329.6740         | 657.3566       | 329.1819         | 7  |
| 20 | 2305.1315 | 1153.0694       | 2288.1050      | 1144.5561        | 2287.1210      | 1144.0641        | A    | 576.2988  | 288.6530        | 559.2722       | 280.1397         | 558.2882       | 279.6477         | 6  |
| 21 | 2376.1686 | 1188.5880       | 2359.1421      | 1180.0747        | 2358.1581      | 1179.5827        | A    | 505.2617  | 253.1345        | 488.2351       | 244.6212         | 487.2511       | 244.1292         | 5  |

|    |           |                  |           |           |           |           |   |                 |          |          |          |          |          |   |
|----|-----------|------------------|-----------|-----------|-----------|-----------|---|-----------------|----------|----------|----------|----------|----------|---|
| 22 | 2491.1956 | <b>1246.1014</b> | 2474.1690 | 1237.5882 | 2473.1850 | 1237.0961 | N | <b>434.2245</b> | 217.6159 | 417.1980 | 209.1026 | 416.2140 | 208.6106 | 4 |
| 23 | 2562.2327 | <b>1281.6200</b> | 2545.2061 | 1273.1067 | 2544.2221 | 1272.6147 | A | <b>319.1976</b> | 160.1024 | 302.1710 | 151.5892 | 301.1870 | 151.0972 | 3 |
| 24 | 2663.2804 | <b>1332.1438</b> | 2646.2538 | 1323.6305 | 2645.2698 | 1323.1385 | T |                 | 248.1605 | 124.5839 | 231.1339 | 116.0706 | 230.1499 | 2 |
| 25 |           |                  |           |           |           |           | K |                 | 147.1128 | 74.0600  | 130.0863 | 65.5468  |          | 1 |

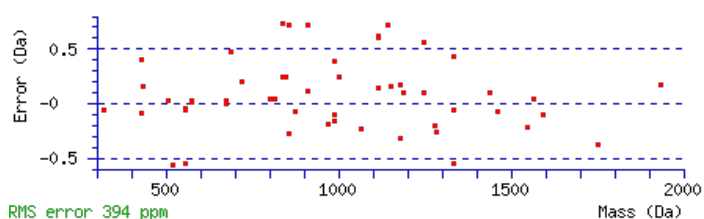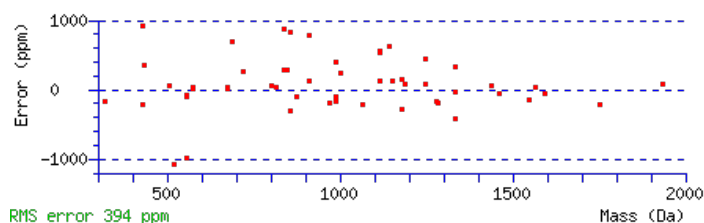

NCBI BLAST search of [LEPVHLQLQCMSQEQLAQVAANATK](#)

(Parameters: blastp, nr protein database, expect=20000, no filter, PAM30)

Other BLAST [web gateways](#)

All matches to this query

| Score | Mr(calc)  | Delta  | Sequence                                  | Site Analysis              |
|-------|-----------|--------|-------------------------------------------|----------------------------|
| 62.7  | 2808.3786 | 0.0134 | <a href="#">LEPVHLQLQCMSQEQLAQVAANATK</a> | Deamidated Q15, N22 14.71% |
| 62.2  | 2808.3786 | 0.0134 | <a href="#">LEPVHLQLQCMSQEQLAQVAANATK</a> | Deamidated Q7, N22 13.08%  |
| 61.0  | 2808.3786 | 0.0134 | <a href="#">LEPVHLQLQCMSQEQLAQVAANATK</a> | Deamidated Q9, N22 9.83%   |
| 60.7  | 2808.3786 | 0.0134 | <a href="#">LEPVHLQLQCMSQEQLAQVAANATK</a> | Deamidated Q13, N22 9.24%  |
| 59.5  | 2808.3786 | 0.0134 | <a href="#">LEPVHLQLQCMSQEQLAQVAANATK</a> | Deamidated Q7, Q18 7.11%   |
| 59.4  | 2808.3786 | 0.0134 | <a href="#">LEPVHLQLQCMSQEQLAQVAANATK</a> | Deamidated Q18, N22 6.87%  |
| 58.3  | 2807.3946 | 0.9974 | <a href="#">LEPVHLQLQCMSQEQLAQVAANATK</a> |                            |
| 58.3  | 2808.3786 | 0.0134 | <a href="#">LEPVHLQLQCMSQEQLAQVAANATK</a> | Deamidated Q9, Q18 5.34%   |
| 58.0  | 2808.3786 | 0.0134 | <a href="#">LEPVHLQLQCMSQEQLAQVAANATK</a> | Deamidated Q13, Q18 5.01%  |
| 58.0  | 2808.3786 | 0.0134 | <a href="#">LEPVHLQLQCMSQEQLAQVAANATK</a> | Deamidated Q15, Q18 5.00%  |

Mascot: <http://www.matrixscience.com/>

# MATRIX SCIENCE Mascot Search Results

## Peptide View

MS/MS Fragmentation of **LEPVHLQLQCMSQEQLAQVAANATK**

Found in **Q96PD5** in **con\_Xuniprot\_HUMAN3**, PGRP2\_HUMAN N-acetylmuramoyl-L-alanine amidase OS=Homo sapiens GN=PLYR2 PE=1 SV=1

Match to Query 25613: 2808.388002 from(937.136610,3+) intensity(44950.2148) rtinseconds(2137) scans(5238) index(9070)  
 Title: 111019\_Est\_ISCardio\_NMI\_YS\_G\_4Spectrum4505\_scans\_5238  
 Data file C:\mascot\20140703\_Tmgf\_1D\CSV\_UseAnalysis\MasterCSV\All\_Glyco\mgf\ptm\UC18ERLIC\_PTM\_35D.mgf

Click mouse within plot area to zoom in by factor of two about that point

Or,  to  Da  
 Label all possible matches  Label matches used for scoring   
 Show Y-axis

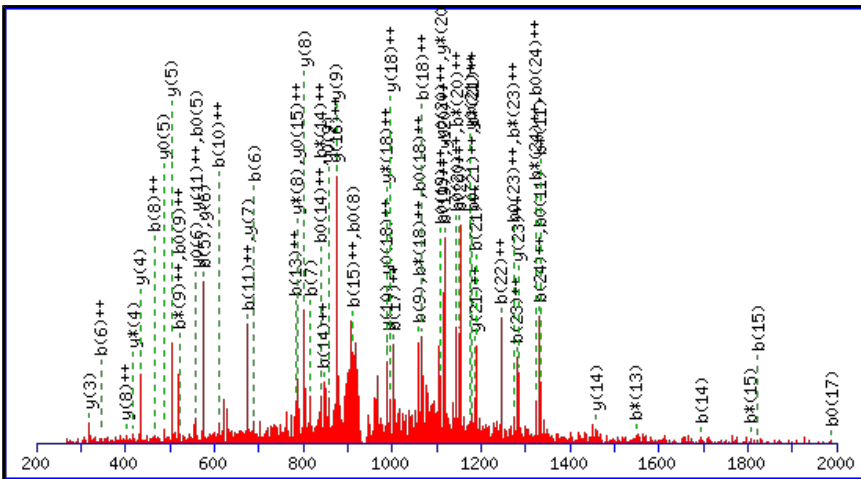

Monoisotopic mass of neutral peptide Mr(calc): 2808.3786  
 Fixed modifications: Carbamidomethyl (C) (apply to specified residues or termini only)  
 Variable modifications:  
 Q9 : Deamidated (NQ)  
 N22 : Deamidated (NQ)  
 Ions Score: 53 Expect: 0.0014  
 Matches : 71/272 fragment ions using 156 most intense peaks ([help](#))

| #  | b         | b <sup>++</sup> | b <sup>*</sup> | b <sup>*++</sup> | b <sup>0</sup> | b <sup>0++</sup> | Seq. | y         | y <sup>++</sup> | y <sup>*</sup> | y <sup>*++</sup> | y <sup>0</sup> | y <sup>0++</sup> | #  |
|----|-----------|-----------------|----------------|------------------|----------------|------------------|------|-----------|-----------------|----------------|------------------|----------------|------------------|----|
| 1  | 114.0913  | 57.5493         |                |                  |                |                  | L    |           |                 |                |                  |                |                  | 25 |
| 2  | 243.1339  | 122.0706        |                |                  | 225.1234       | 113.0653         | E    | 2696.3018 | 1348.6546       | 2679.2753      | 1340.1413        | 2678.2913      | 1339.6493        | 24 |
| 3  | 340.1867  | 170.5970        |                |                  | 322.1761       | 161.5917         | P    | 2567.2592 | 1284.1333       | 2550.2327      | 1275.6200        | 2549.2487      | 1275.1280        | 23 |
| 4  | 439.2551  | 220.1312        |                |                  | 421.2445       | 211.1259         | V    | 2470.2065 | 1235.6069       | 2453.1799      | 1227.0936        | 2452.1959      | 1226.6016        | 22 |
| 5  | 576.3140  | 288.6606        |                |                  | 558.3035       | 279.6554         | H    | 2371.1381 | 1186.0727       | 2354.1115      | 1177.5594        | 2353.1275      | 1177.0674        | 21 |
| 6  | 689.3981  | 345.2027        |                |                  | 671.3875       | 336.1974         | L    | 2234.0791 | 1117.5432       | 2217.0526      | 1109.0299        | 2216.0686      | 1108.5379        | 20 |
| 7  | 817.4567  | 409.2320        | 800.4301       | 400.7187         | 799.4461       | 400.2267         | Q    | 2120.9951 | 1061.0012       | 2103.9685      | 1052.4879        | 2102.9845      | 1051.9959        | 19 |
| 8  | 930.5407  | 465.7740        | 913.5142       | 457.2607         | 912.5302       | 456.7687         | L    | 1992.9365 | 996.9719        | 1975.9100      | 988.4586         | 1974.9259      | 987.9666         | 18 |
| 9  | 1059.5833 | 530.2953        | 1042.5568      | 521.7820         | 1041.5728      | 521.2900         | Q    | 1879.8524 | 940.4299        | 1862.8259      | 931.9166         | 1861.8419      | 931.4246         | 17 |
| 10 | 1219.6140 | 610.3106        | 1202.5874      | 601.7973         | 1201.6034      | 601.3053         | C    | 1750.8098 | 875.9086        | 1733.7833      | 867.3953         | 1732.7993      | 866.9033         | 16 |
| 11 | 1350.6545 | 675.8309        | 1333.6279      | 667.3176         | 1332.6439      | 666.8256         | M    | 1590.7792 | 795.8932        | 1573.7527      | 787.3800         | 1572.7686      | 786.8880         | 15 |
| 12 | 1437.6865 | 719.3469        | 1420.6599      | 710.8336         | 1419.6759      | 710.3416         | S    | 1459.7387 | 730.3730        | 1442.7122      | 721.8597         | 1441.7282      | 721.3677         | 14 |
| 13 | 1565.7451 | 783.3762        | 1548.7185      | 774.8629         | 1547.7345      | 774.3709         | Q    | 1372.7067 | 686.8570        | 1355.6801      | 678.3437         | 1354.6961      | 677.8517         | 13 |
| 14 | 1694.7877 | 847.8975        | 1677.7611      | 839.3842         | 1676.7771      | 838.8922         | E    | 1244.6481 | 622.8277        | 1227.6216      | 614.3144         | 1226.6375      | 613.8224         | 12 |
| 15 | 1822.8462 | 911.9268        | 1805.8197      | 903.4135         | 1804.8357      | 902.9215         | Q    | 1115.6055 | 558.3064        | 1098.5790      | 549.7931         | 1097.5950      | 549.3011         | 11 |
| 16 | 1935.9303 | 968.4688        | 1918.9037      | 959.9555         | 1917.9197      | 959.4635         | L    | 987.5469  | 494.2771        | 970.5204       | 485.7638         | 969.5364       | 485.2718         | 10 |
| 17 | 2006.9674 | 1003.9873       | 1989.9409      | 995.4741         | 1988.9568      | 994.9821         | A    | 874.4629  | 437.7351        | 857.4363       | 429.2218         | 856.4523       | 428.7298         | 9  |
| 18 | 2135.0260 | 1068.0166       | 2117.9994      | 1059.5034        | 2117.0154      | 1059.0114        | Q    | 803.4258  | 402.2165        | 786.3992       | 393.7032         | 785.4152       | 393.2112         | 8  |
| 19 | 2234.0944 | 1117.5508       | 2217.0679      | 1109.0376        | 2216.0838      | 1108.5456        | V    | 675.3672  | 338.1872        | 658.3406       | 329.6740         | 657.3566       | 329.1819         | 7  |
| 20 | 2305.1315 | 1153.0694       | 2288.1050      | 1144.5561        | 2287.1210      | 1144.0641        | A    | 576.2988  | 288.6530        | 559.2722       | 280.1397         | 558.2882       | 279.6477         | 6  |
| 21 | 2376.1686 | 1188.5880       | 2359.1421      | 1180.0747        | 2358.1581      | 1179.5827        | A    | 505.2617  | 253.1345        | 488.2351       | 244.6212         | 487.2511       | 244.1292         | 5  |

|    |           |                  |           |                  |           |                  |   |                 |          |                 |          |          |          |   |
|----|-----------|------------------|-----------|------------------|-----------|------------------|---|-----------------|----------|-----------------|----------|----------|----------|---|
| 22 | 2491.1956 | <b>1246.1014</b> | 2474.1690 | 1237.5882        | 2473.1850 | 1237.0961        | N | <b>434.2245</b> | 217.6159 | <b>417.1980</b> | 209.1026 | 416.2140 | 208.6106 | 4 |
| 23 | 2562.2327 | <b>1281.6200</b> | 2545.2061 | <b>1273.1067</b> | 2544.2221 | <b>1272.6147</b> | A | <b>319.1976</b> | 160.1024 | 302.1710        | 151.5892 | 301.1870 | 151.0972 | 3 |
| 24 | 2663.2804 | <b>1332.1438</b> | 2646.2538 | <b>1323.6305</b> | 2645.2698 | <b>1323.1385</b> | T |                 | 248.1605 | 124.5839        | 231.1339 | 116.0706 | 230.1499 | 2 |
| 25 |           |                  |           |                  |           |                  | K |                 | 147.1128 | 74.0600         | 130.0863 | 65.5468  |          | 1 |

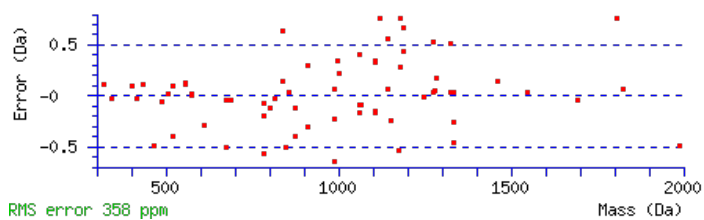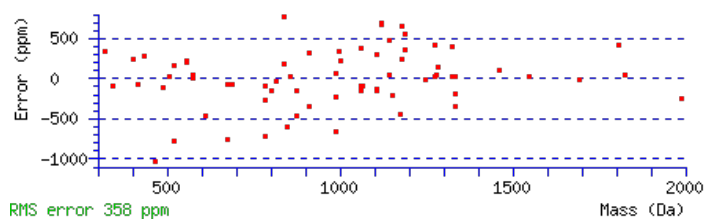

NCBI BLAST search of [LEPVHLQLQCMSQEQLAQVAANATK](#)

(Parameters: blastp, nr protein database, expect=20000, no filter, PAM30)

Other BLAST [web gateways](#)

All matches to this query

| Score | Mr(calc)  | Delta  | Sequence                                  | Site Analysis              |
|-------|-----------|--------|-------------------------------------------|----------------------------|
| 52.7  | 2808.3786 | 0.0094 | <a href="#">LEPVHLQLQCMSQEQLAQVAANATK</a> | Deamidated Q9, N22 26.71%  |
| 51.5  | 2808.3786 | 0.0094 | <a href="#">LEPVHLQLQCMSQEQLAQVAANATK</a> | Deamidated Q9, Q18 20.31%  |
| 48.6  | 2808.3786 | 0.0094 | <a href="#">LEPVHLQLQCMSQEQLAQVAANATK</a> | Deamidated Q13, N22 10.27% |
| 48.6  | 2808.3786 | 0.0094 | <a href="#">LEPVHLQLQCMSQEQLAQVAANATK</a> | Deamidated Q15, N22 10.27% |
| 48.0  | 2808.3786 | 0.0094 | <a href="#">LEPVHLQLQCMSQEQLAQVAANATK</a> | Deamidated Q13, Q18 9.11%  |
| 48.0  | 2808.3786 | 0.0094 | <a href="#">LEPVHLQLQCMSQEQLAQVAANATK</a> | Deamidated Q15, Q18 9.09%  |
| 46.9  | 2808.3786 | 0.0094 | <a href="#">LEPVHLQLQCMSQEQLAQVAANATK</a> | Deamidated Q18, N22 7.02%  |
| 41.2  | 2807.3946 | 0.9934 | <a href="#">LEPVHLQLQCMSQEQLAQVAANATK</a> |                            |
| 40.7  | 2807.3946 | 0.9934 | <a href="#">LEPVHLQLQCMSQEQLAQVAANATK</a> |                            |
| 38.9  | 2808.3786 | 0.0094 | <a href="#">LEPVHLQLQCMSQEQLAQVAANATK</a> | Deamidated Q7, Q18 1.10%   |

Mascot: <http://www.matrixscience.com/>

# MATRIX SCIENCE Mascot Search Results

## Peptide View

MS/MS Fragmentation of **LEPVHLQLQCMSQEQLAQVAANATK**

Found in **Q96PD5** in **con\_Xuniprot\_HUMAN3**, PGRP2\_HUMAN N-acetylmuramoyl-L-alanine amidase OS=Homo sapiens GN=PLYR2 PE=1 SV=1

Match to Query 25611: 2808.380112 from(937.133980,3+) intensity(47824.6680) rtinseconds(2016) scans(5204) index(9662)

Title: 111019\_Est\_ISCardio\_NMI\_YS\_G\_5Spectrum4475\_scans\_5204

Data file C:\mascot\20140703\_Tmgf\_1D\CSV\_UseAnalysis\MasterCSV\All\_Glyco\mgf\ptm\UC18ERLIC\_PTM\_35D.mgf

Click mouse within plot area to zoom in by factor of two about that point

Or, to Da

Label all possible matches Label matches used for scoring

Show Y-axis

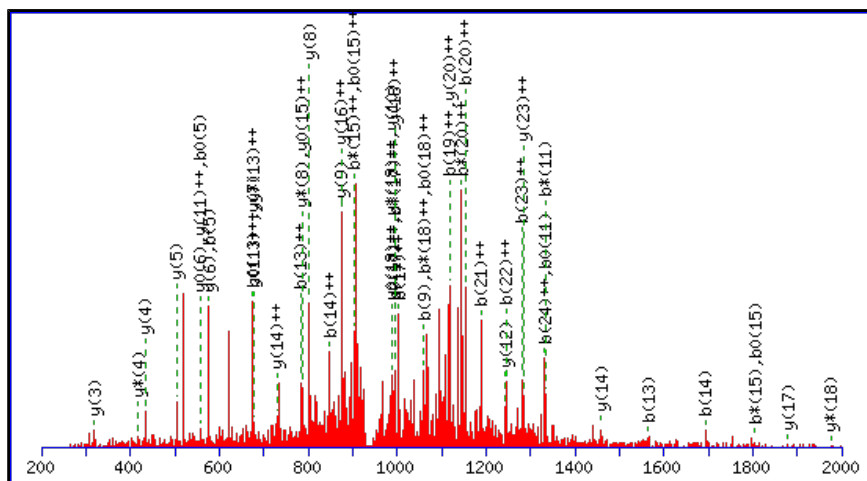

Monoisotopic mass of neutral peptide Mr(calc): 2808.3786

Fixed modifications: Carbamidomethyl (C) (apply to specified residues or termini only)

Variable modifications:

Q7 : Deamidated (NQ)

N22 : Deamidated (NQ)

Ions Score: 47 Expect: 0.0049

Matches : 52/272 fragment ions using 88 most intense peaks ([help](#))

| #  | b         | b <sup>++</sup> | b <sup>*</sup> | b <sup>*++</sup> | b <sup>0</sup> | b <sup>0++</sup> | Seq. | y         | y <sup>++</sup> | y <sup>*</sup> | y <sup>*++</sup> | y <sup>0</sup> | y <sup>0++</sup> | #  |
|----|-----------|-----------------|----------------|------------------|----------------|------------------|------|-----------|-----------------|----------------|------------------|----------------|------------------|----|
| 1  | 114.0913  | 57.5493         |                |                  |                |                  | L    |           |                 |                |                  |                |                  | 25 |
| 2  | 243.1339  | 122.0706        |                |                  | 225.1234       | 113.0653         | E    | 2696.3018 | 1348.6546       | 2679.2753      | 1340.1413        | 2678.2913      | 1339.6493        | 24 |
| 3  | 340.1867  | 170.5970        |                |                  | 322.1761       | 161.5917         | P    | 2567.2592 | 1284.1333       | 2550.2327      | 1275.6200        | 2549.2487      | 1275.1280        | 23 |
| 4  | 439.2551  | 220.1312        |                |                  | 421.2445       | 211.1259         | V    | 2470.2065 | 1235.6069       | 2453.1799      | 1227.0936        | 2452.1959      | 1226.6016        | 22 |
| 5  | 576.3140  | 288.6606        |                |                  | 558.3035       | 279.6554         | H    | 2371.1381 | 1186.0727       | 2354.1115      | 1177.5594        | 2353.1275      | 1177.0674        | 21 |
| 6  | 689.3981  | 345.2027        |                |                  | 671.3875       | 336.1974         | L    | 2234.0791 | 1117.5432       | 2217.0526      | 1109.0299        | 2216.0686      | 1108.5379        | 20 |
| 7  | 818.4407  | 409.7240        | 801.4141       | 401.2107         | 800.4301       | 400.7187         | Q    | 2120.9951 | 1061.0012       | 2103.9685      | 1052.4879        | 2102.9845      | 1051.9959        | 19 |
| 8  | 931.5247  | 466.2660        | 914.4982       | 457.7527         | 913.5142       | 457.2607         | L    | 1991.9525 | 996.4799        | 1974.9259      | 987.9666         | 1973.9419      | 987.4746         | 18 |
| 9  | 1059.5833 | 530.2953        | 1042.5568      | 521.7820         | 1041.5728      | 521.2900         | Q    | 1878.8684 | 939.9379        | 1861.8419      | 931.4246         | 1860.8579      | 930.9326         | 17 |
| 10 | 1219.6140 | 610.3106        | 1202.5874      | 601.7973         | 1201.6034      | 601.3053         | C    | 1750.8098 | 875.9086        | 1733.7833      | 867.3953         | 1732.7993      | 866.9033         | 16 |
| 11 | 1350.6545 | 675.8309        | 1333.6279      | 667.3176         | 1332.6439      | 666.8256         | M    | 1590.7792 | 795.8932        | 1573.7527      | 787.3800         | 1572.7686      | 786.8880         | 15 |
| 12 | 1437.6865 | 719.3469        | 1420.6599      | 710.8336         | 1419.6759      | 710.3416         | S    | 1459.7387 | 730.3730        | 1442.7122      | 721.8597         | 1441.7282      | 721.3677         | 14 |
| 13 | 1565.7451 | 783.3762        | 1548.7185      | 774.8629         | 1547.7345      | 774.3709         | Q    | 1372.7067 | 686.8570        | 1355.6801      | 678.3437         | 1354.6961      | 677.8517         | 13 |
| 14 | 1694.7877 | 847.8975        | 1677.7611      | 839.3842         | 1676.7771      | 838.8922         | E    | 1244.6481 | 622.8277        | 1227.6216      | 614.3144         | 1226.6375      | 613.8224         | 12 |
| 15 | 1822.8462 | 911.9268        | 1805.8197      | 903.4135         | 1804.8357      | 902.9215         | Q    | 1115.6055 | 558.3064        | 1098.5790      | 549.7931         | 1097.5950      | 549.3011         | 11 |
| 16 | 1935.9303 | 968.4688        | 1918.9037      | 959.9555         | 1917.9197      | 959.4635         | L    | 987.5469  | 494.2771        | 970.5204       | 485.7638         | 969.5364       | 485.2718         | 10 |
| 17 | 2006.9674 | 1003.9873       | 1989.9409      | 995.4741         | 1988.9568      | 994.9821         | A    | 874.4629  | 437.7351        | 857.4363       | 429.2218         | 856.4523       | 428.7298         | 9  |
| 18 | 2135.0260 | 1068.0166       | 2117.9994      | 1059.5034        | 2117.0154      | 1059.0114        | Q    | 803.4258  | 402.2165        | 786.3992       | 393.7032         | 785.4152       | 393.2112         | 8  |
| 19 | 2234.0944 | 1117.5508       | 2217.0679      | 1109.0376        | 2216.0838      | 1108.5456        | V    | 675.3672  | 338.1872        | 658.3406       | 329.6740         | 657.3566       | 329.1819         | 7  |
| 20 | 2305.1315 | 1153.0694       | 2288.1050      | 1144.5561        | 2287.1210      | 1144.0641        | A    | 576.2988  | 288.6530        | 559.2722       | 280.1397         | 558.2882       | 279.6477         | 6  |
| 21 | 2376.1686 | 1188.5880       | 2359.1421      | 1180.0747        | 2358.1581      | 1179.5827        | A    | 505.2617  | 253.1345        | 488.2351       | 244.6212         | 487.2511       | 244.1292         | 5  |

|    |           |                  |           |           |           |           |   |                 |          |                 |          |          |          |   |
|----|-----------|------------------|-----------|-----------|-----------|-----------|---|-----------------|----------|-----------------|----------|----------|----------|---|
| 22 | 2491.1956 | <b>1246.1014</b> | 2474.1690 | 1237.5882 | 2473.1850 | 1237.0961 | N | <b>434.2245</b> | 217.6159 | <b>417.1980</b> | 209.1026 | 416.2140 | 208.6106 | 4 |
| 23 | 2562.2327 | <b>1281.6200</b> | 2545.2061 | 1273.1067 | 2544.2221 | 1272.6147 | A | <b>319.1976</b> | 160.1024 | 302.1710        | 151.5892 | 301.1870 | 151.0972 | 3 |
| 24 | 2663.2804 | <b>1332.1438</b> | 2646.2538 | 1323.6305 | 2645.2698 | 1323.1385 | T | 248.1605        | 124.5839 | 231.1339        | 116.0706 | 230.1499 | 115.5786 | 2 |
| 25 |           |                  |           |           |           |           | K | 147.1128        | 74.0600  | 130.0863        | 65.5468  |          |          | 1 |

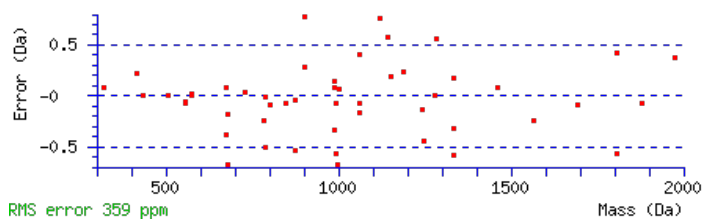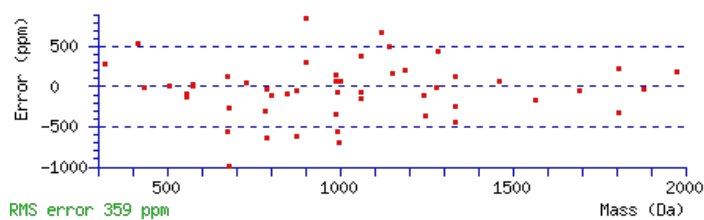

NCBI BLAST search of [LEPVHLQLQCMSQEQLAQVAANATK](#)  
 (Parameters: blastp, nr protein database, expect=20000, no filter, PAM30)  
 Other BLAST [web gateways](#)

All matches to this query

| Score | Mr(calc)  | Delta  | Sequence                                  | Site Analysis             |
|-------|-----------|--------|-------------------------------------------|---------------------------|
| 47.4  | 2808.3786 | 0.0015 | <a href="#">LEPVHLQLQCMSQEQLAQVAANATK</a> | Deamidated Q7, N22 48.83% |
| 41.1  | 2808.3786 | 0.0015 | <a href="#">LEPVHLQLQCMSQEQLAQVAANATK</a> | Deamidated Q7, Q18 11.26% |
| 40.8  | 2808.3786 | 0.0015 | <a href="#">LEPVHLQLQCMSQEQLAQVAANATK</a> | Deamidated Q9, N22 10.63% |
| 39.9  | 2808.3786 | 0.0015 | <a href="#">LEPVHLQLQCMSQEQLAQVAANATK</a> | Deamidated Q15, N22 8.60% |
| 35.8  | 2808.3786 | 0.0015 | <a href="#">LEPVHLQLQCMSQEQLAQVAANATK</a> | Deamidated Q13, N22 3.36% |
| 35.8  | 2808.3786 | 0.0015 | <a href="#">LEPVHLQLQCMSQEQLAQVAANATK</a> | Deamidated Q9, Q18 3.34%  |
| 35.8  | 2808.3786 | 0.0015 | <a href="#">LEPVHLQLQCMSQEQLAQVAANATK</a> | Deamidated Q15, Q18 3.32% |
| 35.7  | 2808.3786 | 0.0015 | <a href="#">LEPVHLQLQCMSQEQLAQVAANATK</a> | Deamidated Q18, N22 3.26% |
| 32.4  | 2808.3786 | 0.0015 | <a href="#">LEPVHLQLQCMSQEQLAQVAANATK</a> | Deamidated Q13, Q18 1.53% |
| 31.3  | 2808.3786 | 0.0015 | <a href="#">LEPVHLQLQCMSQEQLAQVAANATK</a> | Deamidated Q7, Q15 1.18%  |

Mascot: <http://www.matrixscience.com/>



# MATRIX SCIENCE Mascot Search Results

## Peptide View

MS/MS Fragmentation of **LEPVHLQLQCMSQEQLAQVAANATK**

Found in **Q96PD5** in **con\_Xuniprot\_HUMAN3**, PGRP2\_HUMAN N-acetylmuramoyl-L-alanine amidase OS=Homo sapiens GN=PGLYRP2 PE=1 SV=1

Match to Query 25743: 2824.377912 from(942.466580,3+) intensity(27197.3047) rtinseconds(1795) scans(4564) index(9571)

Title: 111019\_Est\_ISCardio\_NMI\_YS\_G\_5Spectrum3910\_scans\_4564

Data file C:\mascot\20140703\_Tmgf\_1D\CSV\_UseAnalysis\MasterCSV\All\_Glyco\mgf\ptm\UC18ERLIC\_PTM\_35D.mgf

Click mouse within plot area to zoom in by factor of two about that point

Or, to Da

Label all possible matches Label matches used for scoring

Show Y-axis

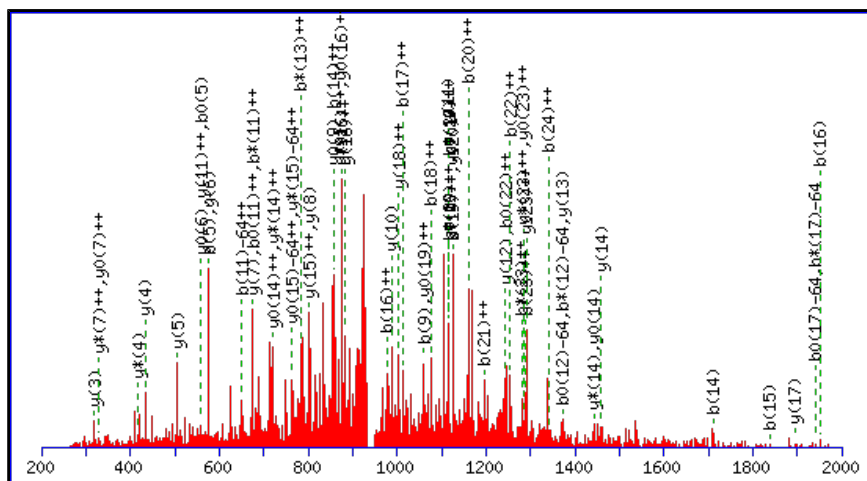

Monoisotopic mass of neutral peptide Mr(calc): 2824.3735

Fixed modifications: Carbamidomethyl (C) (apply to specified residues or termini only)

Variable modifications:

Q7 : Deamidated (NQ)

M11 : Oxidation (M), with neutral losses 0.0000(shown in table), 63.9983

N22 : Deamidated (NQ)

Ions Score: 41 Expect: 0.022

Matches : 65/416 fragment ions using 137 most intense peaks ([help](#))

| #  | b         | b <sup>++</sup> | b <sup>*</sup> | b <sup>*++</sup> | b <sup>0</sup> | b <sup>0++</sup> | Seq. | y         | y <sup>++</sup> | y <sup>*</sup> | y <sup>*++</sup> | y <sup>0</sup> | y <sup>0++</sup> | #  |
|----|-----------|-----------------|----------------|------------------|----------------|------------------|------|-----------|-----------------|----------------|------------------|----------------|------------------|----|
| 1  | 114.0913  | 57.5493         |                |                  |                |                  | L    |           |                 |                |                  |                |                  | 25 |
| 2  | 243.1339  | 122.0706        |                |                  | 225.1234       | 113.0653         | E    | 2712.2967 | 1356.6520       | 2695.2702      | 1348.1387        | 2694.2862      | 1347.6467        | 24 |
| 3  | 340.1867  | 170.5970        |                |                  | 322.1761       | 161.5917         | P    | 2583.2542 | 1292.1307       | 2566.2276      | 1283.6174        | 2565.2436      | 1283.1254        | 23 |
| 4  | 439.2551  | 220.1312        |                |                  | 421.2445       | 211.1259         | V    | 2486.2014 | 1243.6043       | 2469.1748      | 1235.0911        | 2468.1908      | 1234.5991        | 22 |
| 5  | 576.3140  | 288.6606        |                |                  | 558.3035       | 279.6554         | H    | 2387.1330 | 1194.0701       | 2370.1064      | 1185.5569        | 2369.1224      | 1185.0648        | 21 |
| 6  | 689.3981  | 345.2027        |                |                  | 671.3875       | 336.1974         | L    | 2250.0741 | 1125.5407       | 2233.0475      | 1117.0274        | 2232.0635      | 1116.5354        | 20 |
| 7  | 818.4407  | 409.7240        | 801.4141       | 401.2107         | 800.4301       | 400.7187         | Q    | 2136.9900 | 1068.9986       | 2119.9635      | 1060.4854        | 2118.9794      | 1059.9934        | 19 |
| 8  | 931.5247  | 466.2660        | 914.4982       | 457.7527         | 913.5142       | 457.2607         | L    | 2007.9474 | 1004.4773       | 1990.9209      | 995.9641         | 1989.9368      | 995.4721         | 18 |
| 9  | 1059.5833 | 530.2953        | 1042.5568      | 521.7820         | 1041.5728      | 521.2900         | Q    | 1894.8633 | 947.9353        | 1877.8368      | 939.4220         | 1876.8528      | 938.9300         | 17 |
| 10 | 1219.6140 | 610.3106        | 1202.5874      | 601.7973         | 1201.6034      | 601.3053         | C    | 1766.8048 | 883.9060        | 1749.7782      | 875.3927         | 1748.7942      | 874.9007         | 16 |
| 11 | 1366.6494 | 683.8283        | 1349.6228      | 675.3150         | 1348.6388      | 674.8230         | M    | 1606.7741 | 803.8907        | 1589.7476      | 795.3774         | 1588.7636      | 794.8854         | 15 |
| 12 | 1453.6814 | 727.3443        | 1436.6549      | 718.8311         | 1435.6708      | 718.3391         | S    | 1459.7387 | 730.3730        | 1442.7122      | 721.8597         | 1441.7282      | 721.3677         | 14 |
| 13 | 1581.7400 | 791.3736        | 1564.7134      | 782.8604         | 1563.7294      | 782.3683         | Q    | 1372.7067 | 686.8570        | 1355.6801      | 678.3437         | 1354.6961      | 677.8517         | 13 |
| 14 | 1710.7826 | 855.8949        | 1693.7560      | 847.3816         | 1692.7720      | 846.8896         | E    | 1244.6481 | 622.8277        | 1227.6216      | 614.3144         | 1226.6375      | 613.8224         | 12 |
| 15 | 1838.8411 | 919.9242        | 1821.8146      | 911.4109         | 1820.8306      | 910.9189         | Q    | 1115.6055 | 558.3064        | 1098.5790      | 549.7931         | 1097.5950      | 549.3011         | 11 |
| 16 | 1951.9252 | 976.4662        | 1934.8987      | 967.9530         | 1933.9146      | 967.4610         | L    | 987.5469  | 494.2771        | 970.5204       | 485.7638         | 969.5364       | 485.2718         | 10 |
| 17 | 2022.9623 | 1011.9848       | 2005.9358      | 1003.4715        | 2004.9518      | 1002.9795        | A    | 874.4629  | 437.7351        | 857.4363       | 429.2218         | 856.4523       | 428.7298         | 9  |
| 18 | 2151.0209 | 1076.0141       | 2133.9944      | 1067.5008        | 2133.0103      | 1067.0088        | Q    | 803.4258  | 402.2165        | 786.3992       | 393.7032         | 785.4152       | 393.2112         | 8  |
| 19 | 2250.0893 | 1125.5483       | 2233.0628      | 1117.0350        | 2232.0788      | 1116.5430        | V    | 675.3672  | 338.1872        | 658.3406       | 329.6740         | 657.3566       | 329.1819         | 7  |
| 20 | 2321.1264 | 1161.0669       | 2304.0999      | 1152.5536        | 2303.1159      | 1152.0616        | A    | 576.2988  | 288.6530        | 559.2722       | 280.1397         | 558.2882       | 279.6477         | 6  |
| 21 | 2392.1635 | 1196.5854       | 2375.1370      | 1188.0721        | 2374.1530      | 1187.5801        | A    | 505.2617  | 253.1345        | 488.2351       | 244.6212         | 487.2511       | 244.1292         | 5  |



|    |           |           |           |           |           |           |   |          |          |          |          |          |          |   |
|----|-----------|-----------|-----------|-----------|-----------|-----------|---|----------|----------|----------|----------|----------|----------|---|
| 22 | 2507.1905 | 1254.0989 | 2490.1639 | 1245.5856 | 2489.1799 | 1245.0936 | N | 434.2245 | 217.6159 | 417.1980 | 209.1026 | 416.2140 | 208.6106 | 4 |
| 23 | 2578.2276 | 1289.6174 | 2561.2011 | 1281.1042 | 2560.2170 | 1280.6122 | A | 319.1976 | 160.1024 | 302.1710 | 151.5892 | 301.1870 | 151.0972 | 3 |
| 24 | 2679.2753 | 1340.1413 | 2662.2487 | 1331.6280 | 2661.2647 | 1331.1360 | T | 248.1605 | 124.5839 | 231.1339 | 116.0706 | 230.1499 | 115.5786 | 2 |
| 25 |           |           |           |           |           |           | K | 147.1128 | 74.0600  | 130.0863 | 65.5468  |          |          | 1 |

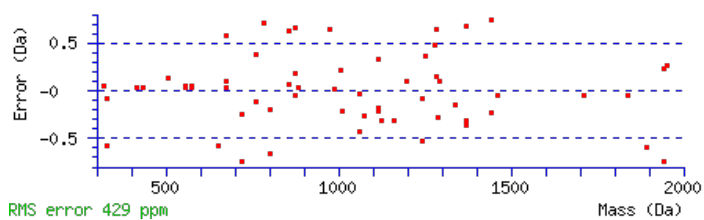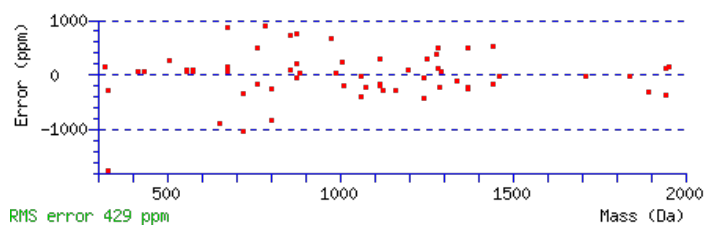

NCBI BLAST search of [LEPVHLQLQCMSQEQLAQVAANATK](#)

(Parameters: blastp, nr protein database, expect=20000, no filter, PAM30)

Other BLAST [web gateways](#)

All matches to this query

| Score | Mr(calc)  | Delta  | Sequence                                  | Site Analysis              |
|-------|-----------|--------|-------------------------------------------|----------------------------|
| 41.0  | 2824.3735 | 0.0044 | <a href="#">LEPVHLQLQCMSQEQLAQVAANATK</a> | Deamidated Q7, N22 45.05%  |
| 37.5  | 2824.3735 | 0.0044 | <a href="#">LEPVHLQLQCMSQEQLAQVAANATK</a> | Deamidated Q13, N22 20.36% |
| 36.3  | 2824.3735 | 0.0044 | <a href="#">LEPVHLQLQCMSQEQLAQVAANATK</a> | Deamidated Q9, N22 15.55%  |
| 32.9  | 2824.3735 | 0.0044 | <a href="#">LEPVHLQLQCMSQEQLAQVAANATK</a> | Deamidated Q15, N22 7.11%  |
| 29.5  | 2824.3735 | 0.0044 | <a href="#">LEPVHLQLQCMSQEQLAQVAANATK</a> | Deamidated Q18, N22 3.21%  |
| 28.4  | 2824.3735 | 0.0044 | <a href="#">LEPVHLQLQCMSQEQLAQVAANATK</a> | Deamidated Q13, Q18 2.50%  |
| 25.2  | 2824.3735 | 0.0044 | <a href="#">LEPVHLQLQCMSQEQLAQVAANATK</a> | Deamidated Q7, Q18 1.20%   |
| 24.6  | 2824.3735 | 0.0044 | <a href="#">LEPVHLQLQCMSQEQLAQVAANATK</a> | Deamidated Q15, Q18 1.05%  |
| 22.7  | 2824.3735 | 0.0044 | <a href="#">LEPVHLQLQCMSQEQLAQVAANATK</a> | Deamidated Q9, Q13 0.67%   |
| 22.6  | 2824.3735 | 0.0044 | <a href="#">LEPVHLQLQCMSQEQLAQVAANATK</a> | Deamidated Q13, Q15 0.66%  |

Mascot: <http://www.matrixscience.com/>

# MASCOT SCIENCE Mascot Search Results

## Peptide View

MS/MS Fragmentation of **LEPVHLQLQCMSQEQLAQVAANATK**

Found in **Q96PD5** in **con\_Xuniprot\_HUMAN3**, PGRP2\_HUMAN N-acetylmuramoyl-L-alanine amidase OS=Homo sapiens GN=PGLYRP2 PE=1 SV=1

Match to Query 25744: 2824.382922 from(942.468250,3+) intensity(38684.0469) rtinseconds(1782) scans(4528) index(9564)

Title: 111019\_Est\_ISCardio\_NMI\_YS\_G\_5Spectrum3878\_scans\_4528

Data file C:\mascot\20140703\_Tmgf\_1D\CSV\_UseAnalysis\MasterCSV\All\_Glyco\mgf\ptm\UC18ERLIC\_PTM\_35D.mgf

Click mouse within plot area to zoom in by factor of two about that point

Or, to Da

Label all possible matches Label matches used for scoring

Show Y-axis

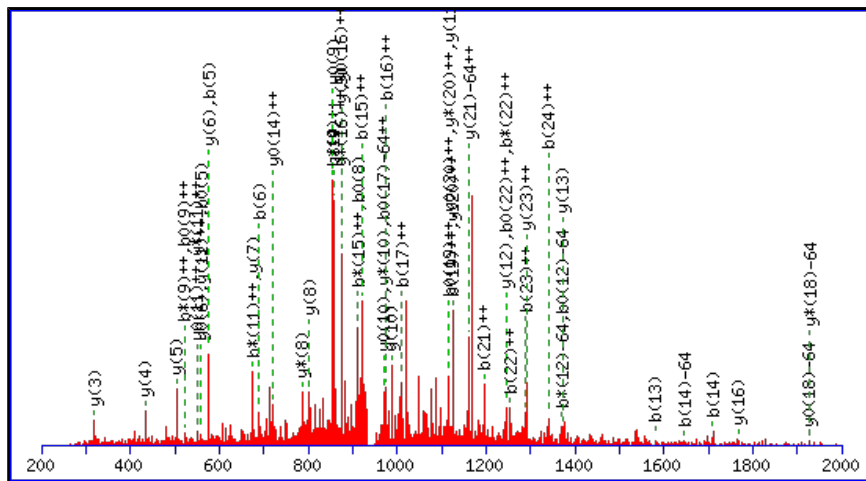

Monoisotopic mass of neutral peptide Mr(calc): 2824.3735

Fixed modifications: Carbamidomethyl (C) (apply to specified residues or termini only)

Variable modifications:

M11 : Oxidation (M), with neutral losses 0.0000(shown in table), 63.9983

Q15 : Deamidated (NQ)

N22 : Deamidated (NQ)

Ions Score: 39 Expect: 0.038

Matches : 58/416 fragment ions using 103 most intense peaks ([help](#))

| #  | b         | b <sup>++</sup> | b <sup>*</sup> | b <sup>*++</sup> | b <sup>0</sup> | b <sup>0++</sup> | Seq. | y         | y <sup>++</sup> | y <sup>*</sup> | y <sup>*++</sup> | y <sup>0</sup> | y <sup>0++</sup> | #  |
|----|-----------|-----------------|----------------|------------------|----------------|------------------|------|-----------|-----------------|----------------|------------------|----------------|------------------|----|
| 1  | 114.0913  | 57.5493         |                |                  |                |                  | L    |           |                 |                |                  |                |                  | 25 |
| 2  | 243.1339  | 122.0706        |                |                  | 225.1234       | 113.0653         | E    | 2712.2967 | 1356.6520       | 2695.2702      | 1348.1387        | 2694.2862      | 1347.6467        | 24 |
| 3  | 340.1867  | 170.5970        |                |                  | 322.1761       | 161.5917         | P    | 2583.2542 | 1292.1307       | 2566.2276      | 1283.6174        | 2565.2436      | 1283.1254        | 23 |
| 4  | 439.2551  | 220.1312        |                |                  | 421.2445       | 211.1259         | V    | 2486.2014 | 1243.6043       | 2469.1748      | 1235.0911        | 2468.1908      | 1234.5991        | 22 |
| 5  | 576.3140  | 288.6606        |                |                  | 558.3035       | 279.6554         | H    | 2387.1330 | 1194.0701       | 2370.1064      | 1185.5569        | 2369.1224      | 1185.0648        | 21 |
| 6  | 689.3981  | 345.2027        |                |                  | 671.3875       | 336.1974         | L    | 2250.0741 | 1125.5407       | 2233.0475      | 1117.0274        | 2232.0635      | 1116.5354        | 20 |
| 7  | 817.4567  | 409.2320        | 800.4301       | 400.7187         | 799.4461       | 400.2267         | Q    | 2136.9900 | 1068.9986       | 2119.9635      | 1060.4854        | 2118.9794      | 1059.9934        | 19 |
| 8  | 930.5407  | 465.7740        | 913.5142       | 457.2607         | 912.5302       | 456.7687         | L    | 2008.9314 | 1004.9693       | 1991.9049      | 996.4561         | 1990.9209      | 995.9641         | 18 |
| 9  | 1058.5993 | 529.8033        | 1041.5728      | 521.2900         | 1040.5887      | 520.7980         | Q    | 1895.8474 | 948.4273        | 1878.8208      | 939.9140         | 1877.8368      | 939.4220         | 17 |
| 10 | 1218.6300 | 609.8186        | 1201.6034      | 601.3053         | 1200.6194      | 600.8133         | C    | 1767.7888 | 884.3980        | 1750.7622      | 875.8848         | 1749.7782      | 875.3927         | 16 |
| 11 | 1365.6654 | 683.3363        | 1348.6388      | 674.8230         | 1347.6548      | 674.3310         | M    | 1607.7581 | 804.3827        | 1590.7316      | 795.8694         | 1589.7476      | 795.3774         | 15 |
| 12 | 1452.6974 | 726.8523        | 1435.6708      | 718.3391         | 1434.6868      | 717.8470         | S    | 1460.7227 | 730.8650        | 1443.6962      | 722.3517         | 1442.7122      | 721.8597         | 14 |
| 13 | 1580.7560 | 790.8816        | 1563.7294      | 782.3683         | 1562.7454      | 781.8763         | Q    | 1373.6907 | 687.3490        | 1356.6642      | 678.8357         | 1355.6801      | 678.3437         | 13 |
| 14 | 1709.7986 | 855.4029        | 1692.7720      | 846.8896         | 1691.7880      | 846.3976         | E    | 1245.6321 | 623.3197        | 1228.6056      | 614.8064         | 1227.6216      | 614.3144         | 12 |
| 15 | 1838.8411 | 919.9242        | 1821.8146      | 911.4109         | 1820.8306      | 910.9189         | Q    | 1116.5895 | 558.7984        | 1099.5630      | 550.2851         | 1098.5790      | 549.7931         | 11 |
| 16 | 1951.9252 | 976.4662        | 1934.8987      | 967.9530         | 1933.9146      | 967.4610         | L    | 987.5469  | 494.2771        | 970.5204       | 485.7638         | 969.5364       | 485.2718         | 10 |
| 17 | 2022.9623 | 1011.9848       | 2005.9358      | 1003.4715        | 2004.9518      | 1002.9795        | A    | 874.4629  | 437.7351        | 857.4363       | 429.2218         | 856.4523       | 428.7298         | 9  |
| 18 | 2151.0209 | 1076.0141       | 2133.9944      | 1067.5008        | 2133.0103      | 1067.0088        | Q    | 803.4258  | 402.2165        | 786.3992       | 393.7032         | 785.4152       | 393.2112         | 8  |
| 19 | 2250.0893 | 1125.5483       | 2233.0628      | 1117.0350        | 2232.0788      | 1116.5430        | V    | 675.3672  | 338.1872        | 658.3406       | 329.6740         | 657.3566       | 329.1819         | 7  |
| 20 | 2321.1264 | 1161.0669       | 2304.0999      | 1152.5536        | 2303.1159      | 1152.0616        | A    | 576.2988  | 288.6530        | 559.2722       | 280.1397         | 558.2882       | 279.6477         | 6  |
| 21 | 2392.1635 | 1196.5854       | 2375.1370      | 1188.0721        | 2374.1530      | 1187.5801        | A    | 505.2617  | 253.1345        | 488.2351       | 244.6212         | 487.2511       | 244.1292         | 5  |

|    |           |                  |           |                  |           |                  |   |                 |          |          |          |          |          |   |
|----|-----------|------------------|-----------|------------------|-----------|------------------|---|-----------------|----------|----------|----------|----------|----------|---|
| 22 | 2507.1905 | <b>1254.0989</b> | 2490.1639 | <b>1245.5856</b> | 2489.1799 | <b>1245.0936</b> | N | <b>434.2245</b> | 217.6159 | 417.1980 | 209.1026 | 416.2140 | 208.6106 | 4 |
| 23 | 2578.2276 | <b>1289.6174</b> | 2561.2011 | 1281.1042        | 2560.2170 | 1280.6122        | A | <b>319.1976</b> | 160.1024 | 302.1710 | 151.5892 | 301.1870 | 151.0972 | 3 |
| 24 | 2679.2753 | <b>1340.1413</b> | 2662.2487 | 1331.6280        | 2661.2647 | 1331.1360        | T | 248.1605        | 124.5839 | 231.1339 | 116.0706 | 230.1499 | 115.5786 | 2 |
| 25 |           |                  |           |                  |           |                  | K | 147.1128        | 74.0600  | 130.0863 | 65.5468  |          |          | 1 |

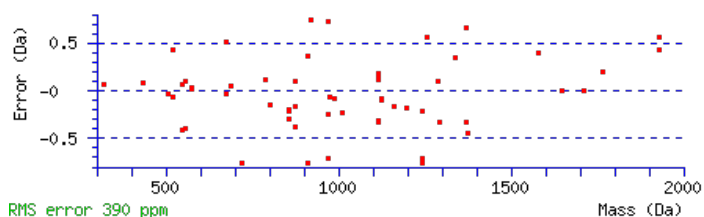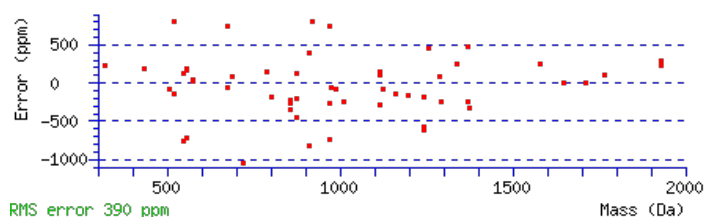

NCBI BLAST search of [LEPVHLQLQCMSQEQLAQVAANATK](#)  
 (Parameters: blastp, nr protein database, expect=20000, no filter, PAM30)  
 Other BLAST [web gateways](#)

All matches to this query

| Score | Mr(calc)  | Delta  | Sequence                                  | Site Analysis              |
|-------|-----------|--------|-------------------------------------------|----------------------------|
| 38.6  | 2824.3735 | 0.0094 | <a href="#">LEPVHLQLQCMSQEQLAQVAANATK</a> | Deamidated Q15, N22 28.11% |
| 34.9  | 2824.3735 | 0.0094 | <a href="#">LEPVHLQLQCMSQEQLAQVAANATK</a> | Deamidated Q9, N22 11.99%  |
| 34.5  | 2824.3735 | 0.0094 | <a href="#">LEPVHLQLQCMSQEQLAQVAANATK</a> | Deamidated Q13, N22 11.01% |
| 34.3  | 2824.3735 | 0.0094 | <a href="#">LEPVHLQLQCMSQEQLAQVAANATK</a> | Deamidated Q9, Q18 10.52%  |
| 33.5  | 2823.3895 | 0.9934 | <a href="#">LEPVHLQLQCMSQEQLAQVAANATK</a> |                            |
| 33.0  | 2824.3735 | 0.0094 | <a href="#">LEPVHLQLQCMSQEQLAQVAANATK</a> | Deamidated Q7, N22 7.89%   |
| 32.7  | 2824.3735 | 0.0094 | <a href="#">LEPVHLQLQCMSQEQLAQVAANATK</a> | Deamidated Q15, Q18 7.34%  |
| 30.4  | 2824.3735 | 0.0094 | <a href="#">LEPVHLQLQCMSQEQLAQVAANATK</a> | Deamidated Q13, Q18 4.23%  |
| 29.7  | 2824.3735 | 0.0094 | <a href="#">LEPVHLQLQCMSQEQLAQVAANATK</a> | Deamidated Q18, N22 3.67%  |
| 28.5  | 2823.3895 | 0.9934 | <a href="#">LEPVHLQLQCMSQEQLAQVAANATK</a> |                            |

Mascot: <http://www.matrixscience.com/>

# MATRIX SCIENCE Mascot Search Results

## Peptide View

MS/MS Fragmentation of **LEPVHLQLQCMSQEQLAQVAANATK**

Found in **Q96PD5** in **con\_Xuniprot\_HUMAN3**, PGRP2\_HUMAN N-acetylmuramoyl-L-alanine amidase OS=Homo sapiens GN=PGLYRP2 PE=1 SV=1

Match to Query 25742: 2824.376982 from(942.466270,3+) intensity(24475.5840) rtinseconds(1834) scans(4628) index(2097)

Title: 111019\_Est\_ISCardio\_NMI\_YP\_G\_4Spectrum4008\_scans\_4628

Data file C:\mascot\20140703\_Tmgf\_1D\CSV\_UseAnalysis\MasterCSV\All\_Glyco\mgf\ptm\UC18ERLIC\_PTM\_35D.mgf

Click mouse within plot area to zoom in by factor of two about that point

Or, to Da

Label all possible matches Label matches used for scoring

Show Y-axis

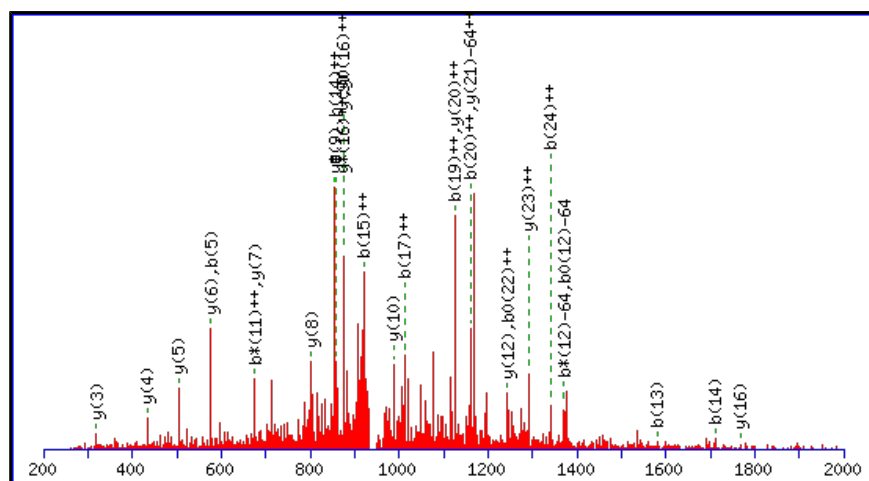

Monoisotopic mass of neutral peptide Mr(calc): 2824.3735

Fixed modifications: Carbamidomethyl (C) (apply to specified residues or termini only)

Variable modifications:

M11 : Oxidation (M), with neutral losses 0.0000(shown in table), 63.9983

Q13 : Deamidated (NQ)

N22 : Deamidated (NQ)

Ions Score: 35 Expect: 0.076

Matches : 30/416 fragment ions using 53 most intense peaks ([help](#))

| #  | b         | b <sup>++</sup> | b <sup>*</sup> | b <sup>*++</sup> | b <sup>0</sup> | b <sup>0++</sup> | Seq. | y         | y <sup>++</sup> | y <sup>*</sup> | y <sup>*++</sup> | y <sup>0</sup> | y <sup>0++</sup> | #  |
|----|-----------|-----------------|----------------|------------------|----------------|------------------|------|-----------|-----------------|----------------|------------------|----------------|------------------|----|
| 1  | 114.0913  | 57.5493         |                |                  |                |                  | L    |           |                 |                |                  |                |                  | 25 |
| 2  | 243.1339  | 122.0706        |                |                  | 225.1234       | 113.0653         | E    | 2712.2967 | 1356.6520       | 2695.2702      | 1348.1387        | 2694.2862      | 1347.6467        | 24 |
| 3  | 340.1867  | 170.5970        |                |                  | 322.1761       | 161.5917         | P    | 2583.2542 | 1292.1307       | 2566.2276      | 1283.6174        | 2565.2436      | 1283.1254        | 23 |
| 4  | 439.2551  | 220.1312        |                |                  | 421.2445       | 211.1259         | V    | 2486.2014 | 1243.6043       | 2469.1748      | 1235.0911        | 2468.1908      | 1234.5991        | 22 |
| 5  | 576.3140  | 288.6606        |                |                  | 558.3035       | 279.6554         | H    | 2387.1330 | 1194.0701       | 2370.1064      | 1185.5569        | 2369.1224      | 1185.0648        | 21 |
| 6  | 689.3981  | 345.2027        |                |                  | 671.3875       | 336.1974         | L    | 2250.0741 | 1125.5407       | 2233.0475      | 1117.0274        | 2232.0635      | 1116.5354        | 20 |
| 7  | 817.4567  | 409.2320        | 800.4301       | 400.7187         | 799.4461       | 400.2267         | Q    | 2136.9900 | 1068.9986       | 2119.9635      | 1060.4854        | 2118.9794      | 1059.9934        | 19 |
| 8  | 930.5407  | 465.7740        | 913.5142       | 457.2607         | 912.5302       | 456.7687         | L    | 2008.9314 | 1004.9693       | 1991.9049      | 996.4561         | 1990.9209      | 995.9641         | 18 |
| 9  | 1058.5993 | 529.8033        | 1041.5728      | 521.2900         | 1040.5887      | 520.7980         | Q    | 1895.8474 | 948.4273        | 1878.8208      | 939.9140         | 1877.8368      | 939.4220         | 17 |
| 10 | 1218.6300 | 609.8186        | 1201.6034      | 601.3053         | 1200.6194      | 600.8133         | C    | 1767.7888 | 884.3980        | 1750.7622      | 875.8848         | 1749.7782      | 875.3927         | 16 |
| 11 | 1365.6654 | 683.3363        | 1348.6388      | 674.8230         | 1347.6548      | 674.3310         | M    | 1607.7581 | 804.3827        | 1590.7316      | 795.8694         | 1589.7476      | 795.3774         | 15 |
| 12 | 1452.6974 | 726.8523        | 1435.6708      | 718.3391         | 1434.6868      | 717.8470         | S    | 1460.7227 | 730.8650        | 1443.6962      | 722.3517         | 1442.7122      | 721.8597         | 14 |
| 13 | 1581.7400 | 791.3736        | 1564.7134      | 782.8604         | 1563.7294      | 782.3683         | Q    | 1373.6907 | 687.3490        | 1356.6642      | 678.8357         | 1355.6801      | 678.3437         | 13 |
| 14 | 1710.7826 | 855.8949        | 1693.7560      | 847.3816         | 1692.7720      | 846.8896         | E    | 1244.6481 | 622.8277        | 1227.6216      | 614.3144         | 1226.6375      | 613.8224         | 12 |
| 15 | 1838.8411 | 919.9242        | 1821.8146      | 911.4109         | 1820.8306      | 910.9189         | Q    | 1115.6055 | 558.3064        | 1098.5790      | 549.7931         | 1097.5950      | 549.3011         | 11 |
| 16 | 1951.9252 | 976.4662        | 1934.8987      | 967.9530         | 1933.9146      | 967.4610         | L    | 987.5469  | 494.2771        | 970.5204       | 485.7638         | 969.5364       | 485.2718         | 10 |
| 17 | 2022.9623 | 1011.9848       | 2005.9358      | 1003.4715        | 2004.9518      | 1002.9795        | A    | 874.4629  | 437.7351        | 857.4363       | 429.2218         | 856.4523       | 428.7298         | 9  |
| 18 | 2151.0209 | 1076.0141       | 2133.9944      | 1067.5008        | 2133.0103      | 1067.0088        | Q    | 803.4258  | 402.2165        | 786.3992       | 393.7032         | 785.4152       | 393.2112         | 8  |
| 19 | 2250.0893 | 1125.5483       | 2233.0628      | 1117.0350        | 2232.0788      | 1116.5430        | V    | 675.3672  | 338.1872        | 658.3406       | 329.6740         | 657.3566       | 329.1819         | 7  |
| 20 | 2321.1264 | 1161.0669       | 2304.0999      | 1152.5536        | 2303.1159      | 1152.0616        | A    | 576.2988  | 288.6530        | 559.2722       | 280.1397         | 558.2882       | 279.6477         | 6  |
| 21 | 2392.1635 | 1196.5854       | 2375.1370      | 1188.0721        | 2374.1530      | 1187.5801        | A    | 505.2617  | 253.1345        | 488.2351       | 244.6212         | 487.2511       | 244.1292         | 5  |

|    |           |           |           |           |           |           |   |          |          |          |          |          |          |   |
|----|-----------|-----------|-----------|-----------|-----------|-----------|---|----------|----------|----------|----------|----------|----------|---|
| 22 | 2507.1905 | 1254.0989 | 2490.1639 | 1245.5856 | 2489.1799 | 1245.0936 | N | 434.2245 | 217.6159 | 417.1980 | 209.1026 | 416.2140 | 208.6106 | 4 |
| 23 | 2578.2276 | 1289.6174 | 2561.2011 | 1281.1042 | 2560.2170 | 1280.6122 | A | 319.1976 | 160.1024 | 302.1710 | 151.5892 | 301.1870 | 151.0972 | 3 |
| 24 | 2679.2753 | 1340.1413 | 2662.2487 | 1331.6280 | 2661.2647 | 1331.1360 | T | 248.1605 | 124.5839 | 231.1339 | 116.0706 | 230.1499 | 115.5786 | 2 |
| 25 |           |           |           |           |           |           | K | 147.1128 | 74.0600  | 130.0863 | 65.5468  |          |          | 1 |

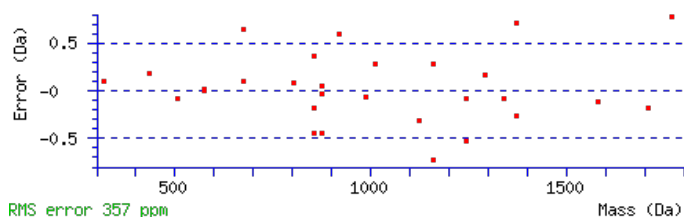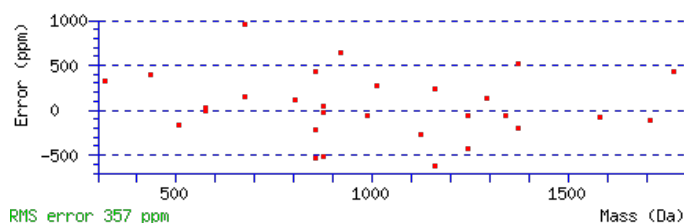

NCBI BLAST search of [LEPVHLQLQCMSQEQLAQVAANATK](#)  
 (Parameters: blastp, nr protein database, expect=20000, no filter, PAM30)  
 Other BLAST [web gateways](#)

All matches to this query

| Score | Mr(calc)  | Delta  | Sequence                                  |
|-------|-----------|--------|-------------------------------------------|
| 35.5  | 2824.3735 | 0.0035 | <a href="#">LEPVHLQLQCMSQEQLAQVAANATK</a> |
| 33.1  | 2824.3735 | 0.0035 | <a href="#">LEPVHLQLQCMSQEQLAQVAANATK</a> |
| 29.3  | 2824.3735 | 0.0035 | <a href="#">LEPVHLQLQCMSQEQLAQVAANATK</a> |
| 27.5  | 2824.3735 | 0.0035 | <a href="#">LEPVHLQLQCMSQEQLAQVAANATK</a> |
| 25.9  | 2824.3735 | 0.0035 | <a href="#">LEPVHLQLQCMSQEQLAQVAANATK</a> |
| 20.7  | 2824.3735 | 0.0035 | <a href="#">LEPVHLQLQCMSQEQLAQVAANATK</a> |
| 20.6  | 2824.3735 | 0.0035 | <a href="#">LEPVHLQLQCMSQEQLAQVAANATK</a> |
| 19.3  | 2824.3735 | 0.0035 | <a href="#">LEPVHLQLQCMSQEQLAQVAANATK</a> |
| 18.1  | 2824.3735 | 0.0035 | <a href="#">LEPVHLQLQCMSQEQLAQVAANATK</a> |
| 16.6  | 2824.3735 | 0.0035 | <a href="#">LEPVHLQLQCMSQEQLAQVAANATK</a> |

Mascot: <http://www.matrixscience.com/>

# MATRIX SCIENCE Mascot Search Results

## Peptide View

MS/MS Fragmentation of **DRQDGEVLQCMPCVGRPVTPIAQNQTTLGSSR**

Found in **Q9NZP8** in **con\_Xuniprot\_HUMAN3**, C1RL\_HUMAN Complement C1r subcomponent-like protein OS=Homo sapiens GN=C1RL PE=1 SV=2

Match to Query 28052: 3715.748736 from(929.944460,4+) intensity(21039.8418) rtinseconds(999) scans(2383) index(24438)

Title: 111019\_Est\_MI\_YS\_G\_06Spectrum2055\_scans\_2383

Data file C:\mascot\20140703\_Tmgf\_1D\CSV\_UseAnalysis\MasterCSV\All\_Glyco\mgf\ptm\UC18ERLIC\_PTM\_35D.mgf

Click mouse within plot area to zoom in by factor of two about that point

Or, to Da

Label all possible matches Label matches used for scoring

Show Y-axis

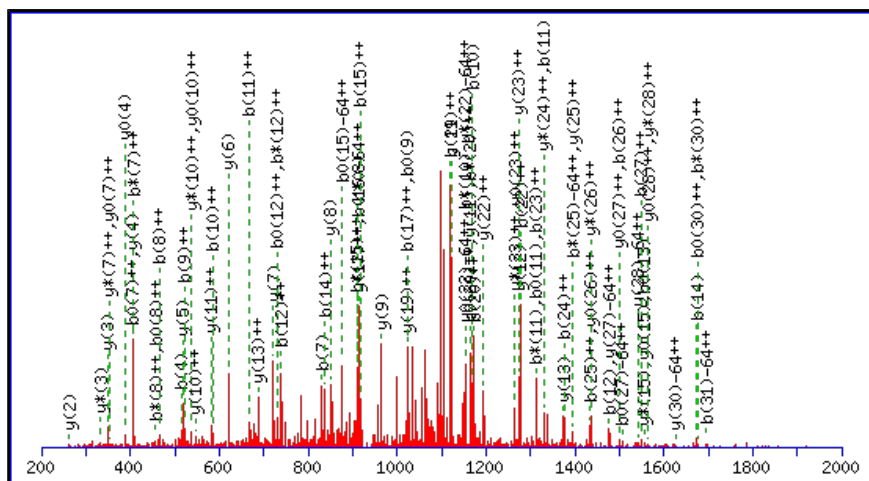

Monoisotopic mass of neutral peptide Mr(calc): 3715.7353

Fixed modifications: Carbamidomethyl (C) (apply to specified residues or termini only)

Variable modifications:

M12 : Oxidation (M), with neutral losses 0.0000 (shown in table), 63.9983

N25 : Deamidated (NQ)

Ions Score: 81 Expect: 1.7e-006

Matches : 85/572 fragment ions using 112 most intense peaks ([help](#))

| #  | b                | b <sup>++</sup>  | b <sup>*</sup>   | b <sup>*++</sup> | b <sup>0</sup>   | b <sup>0++</sup> | Seq. | y                | y <sup>++</sup>  | y <sup>*</sup>   | y <sup>*++</sup> | y <sup>0</sup>   | y <sup>0++</sup> | #  |
|----|------------------|------------------|------------------|------------------|------------------|------------------|------|------------------|------------------|------------------|------------------|------------------|------------------|----|
| 1  | 116.0342         | 58.5207          |                  |                  | 98.0237          | 49.5155          | D    |                  |                  |                  |                  |                  |                  | 33 |
| 2  | 272.1353         | 136.5713         | 255.1088         | 128.0580         | 254.1248         | 127.5660         | R    | 3601.7156        | 1801.3614        | 3584.6890        | 1792.8482        | 3583.7050        | 1792.3561        | 32 |
| 3  | 400.1939         | 200.6006         | 383.1674         | 192.0873         | 382.1833         | 191.5953         | Q    | 3445.6145        | 1723.3109        | 3428.5879        | 1714.7976        | 3427.6039        | 1714.3056        | 31 |
| 4  | <b>515.2209</b>  | 258.1141         | 498.1943         | 249.6008         | 497.2103         | 249.1088         | D    | 3317.5559        | 1659.2816        | 3300.5293        | 1650.7683        | 3299.5453        | 1650.2763        | 30 |
| 5  | 572.2423         | 286.6248         | 555.2158         | 278.1115         | 554.2318         | 277.6195         | G    | 3202.5289        | 1601.7681        | 3185.5024        | 1593.2548        | 3184.5184        | 1592.7628        | 29 |
| 6  | 701.2849         | 351.1461         | 684.2584         | 342.6328         | 683.2743         | 342.1408         | E    | 3145.5075        | 1573.2574        | 3128.4809        | <b>1564.7441</b> | 3127.4969        | <b>1564.2521</b> | 28 |
| 7  | <b>830.3275</b>  | 415.6674         | 813.3010         | <b>407.1541</b>  | 812.3169         | <b>406.6621</b>  | E    | 3016.4649        | 1508.7361        | 2999.4383        | 1500.2228        | 2998.4543        | <b>1499.7308</b> | 27 |
| 8  | 929.3959         | <b>465.2016</b>  | <b>912.3694</b>  | <b>456.6883</b>  | 911.3854         | <b>456.1963</b>  | V    | 2887.4223        | 1444.2148        | 2870.3957        | <b>1435.7015</b> | 2869.4117        | <b>1435.2095</b> | 26 |
| 9  | 1042.4800        | <b>521.7436</b>  | 1025.4534        | 513.2304         | <b>1024.4694</b> | 512.7383         | L    | 2788.3539        | <b>1394.6806</b> | 2771.3273        | 1386.1673        | 2770.3433        | 1385.6753        | 25 |
| 10 | <b>1170.5386</b> | <b>585.7729</b>  | <b>1153.5120</b> | 577.2596         | 1152.5280        | 576.7676         | Q    | 2675.2698        | 1338.1385        | 2658.2433        | <b>1329.6253</b> | 2657.2593        | 1329.1333        | 24 |
| 11 | <b>1330.5692</b> | <b>665.7882</b>  | <b>1313.5427</b> | 657.2750         | <b>1312.5586</b> | 656.7830         | C    | 2547.2112        | <b>1274.1093</b> | 2530.1847        | <b>1265.5960</b> | 2529.2007        | <b>1265.1040</b> | 23 |
| 12 | <b>1477.6046</b> | <b>739.3059</b>  | 1460.5781        | <b>730.7927</b>  | 1459.5940        | <b>730.3007</b>  | M    | 2387.1806        | <b>1194.0939</b> | 2370.1540        | 1185.5807        | 2369.1700        | 1185.0887        | 22 |
| 13 | 1574.6574        | 787.8323         | 1557.6308        | 779.3190         | <b>1556.6468</b> | 778.8270         | P    | 2240.1452        | <b>1120.5762</b> | 2223.1186        | 1112.0630        | 2222.1346        | 1111.5710        | 21 |
| 14 | <b>1673.7258</b> | <b>837.3665</b>  | 1656.6992        | 828.8533         | 1655.7152        | 828.3612         | V    | 2143.0924        | 1072.0499        | 2126.0659        | 1063.5366        | 2125.0819        | 1063.0446        | 20 |
| 15 | 1833.7564        | <b>917.3819</b>  | 1816.7299        | <b>908.8686</b>  | 1815.7459        | 908.3766         | C    | 2044.0240        | <b>1022.5156</b> | 2026.9975        | 1014.0024        | 2026.0135        | 1013.5104        | 19 |
| 16 | 1890.7779        | 945.8926         | 1873.7513        | 937.3793         | 1872.7673        | 936.8873         | G    | 1883.9934        | 942.5003         | 1866.9668        | 933.9870         | 1865.9828        | 933.4950         | 18 |
| 17 | 2046.8790        | <b>1023.9431</b> | 2029.8525        | 1015.4299        | 2028.8684        | 1014.9379        | R    | 1826.9719        | <b>913.9896</b>  | 1809.9454        | 905.4763         | 1808.9613        | 904.9843         | 17 |
| 18 | 2143.9318        | 1072.4695        | 2126.9052        | 1063.9562        | 2125.9212        | 1063.4642        | P    | 1670.8708        | 835.9390         | 1653.8442        | 827.4258         | 1652.8602        | 826.9338         | 16 |
| 19 | 2243.0002        | <b>1122.0037</b> | 2225.9736        | 1113.4905        | 2224.9896        | 1112.9984        | V    | 1573.8180        | 787.4127         | <b>1556.7915</b> | 778.8994         | <b>1555.8075</b> | 778.4074         | 15 |
| 20 | 2344.0479        | <b>1172.5276</b> | 2327.0213        | <b>1164.0143</b> | 2326.0373        | <b>1163.5223</b> | T    | 1474.7496        | 737.8784         | 1457.7231        | 729.3652         | 1456.7390        | 728.8732         | 14 |
| 21 | 2441.1006        | 1221.0540        | 2424.0741        | 1212.5407        | 2423.0901        | 1212.0487        | P    | <b>1373.7019</b> | <b>687.3546</b>  | 1356.6754        | 678.8413         | 1355.6914        | 678.3493         | 13 |

|    |           |                  |           |                  |           |                  |   |                  |                 |                 |                 |                 |                 |    |
|----|-----------|------------------|-----------|------------------|-----------|------------------|---|------------------|-----------------|-----------------|-----------------|-----------------|-----------------|----|
| 22 | 2554.1847 | <b>1277.5960</b> | 2537.1581 | 1269.0827        | 2536.1741 | 1268.5907        | I | <b>1276.6492</b> | 638.8282        | 1259.6226       | 630.3149        | 1258.6386       | 629.8229        | 12 |
| 23 | 2625.2218 | <b>1313.1145</b> | 2608.1953 | 1304.6013        | 2607.2112 | 1304.1093        | A | <b>1163.5651</b> | <b>582.2862</b> | 1146.5386       | 573.7729        | 1145.5545       | 573.2809        | 11 |
| 24 | 2753.2804 | <b>1377.1438</b> | 2736.2538 | 1368.6306        | 2735.2698 | 1368.1385        | Q | 1092.5280        | <b>546.7676</b> | 1075.5014       | <b>538.2544</b> | 1074.5174       | <b>537.7624</b> | 10 |
| 25 | 2868.3073 | <b>1434.6573</b> | 2851.2808 | 1426.1440        | 2850.2968 | 1425.6520        | N | <b>964.4694</b>  | 482.7383        | 947.4429        | 474.2251        | 946.4588        | 473.7331        | 9  |
| 26 | 2996.3659 | <b>1498.6866</b> | 2979.3394 | 1490.1733        | 2978.3553 | 1489.6813        | Q | <b>849.4425</b>  | 425.2249        | 832.4159        | 416.7116        | 831.4319        | 416.2196        | 8  |
| 27 | 3097.4136 | <b>1549.2104</b> | 3080.3870 | 1540.6972        | 3079.4030 | 1540.2051        | T | <b>721.3839</b>  | 361.1956        | 704.3573        | <b>352.6823</b> | 703.3733        | <b>352.1903</b> | 7  |
| 28 | 3198.4613 | 1599.7343        | 3181.4347 | 1591.2210        | 3180.4507 | 1590.7290        | T | <b>620.3362</b>  | 310.6717        | 603.3097        | 302.1585        | 602.3257        | 301.6665        | 6  |
| 29 | 3311.5453 | 1656.2763        | 3294.5188 | 1647.7630        | 3293.5348 | 1647.2710        | L | <b>519.2885</b>  | 260.1479        | 502.2620        | 251.6346        | 501.2780        | 251.1426        | 5  |
| 30 | 3368.5668 | 1684.7870        | 3351.5402 | <b>1676.2738</b> | 3350.5562 | <b>1675.7818</b> | G | <b>406.2045</b>  | 203.6059        | 389.1779        | 195.0926        | <b>388.1939</b> | 194.6006        | 4  |
| 31 | 3455.5988 | 1728.3030        | 3438.5723 | 1719.7898        | 3437.5883 | 1719.2978        | S | <b>349.1830</b>  | 175.0951        | <b>332.1565</b> | 166.5819        | 331.1724        | 166.0899        | 3  |
| 32 | 3542.6308 | 1771.8191        | 3525.6043 | 1763.3058        | 3524.6203 | 1762.8138        | S | <b>262.1510</b>  | 131.5791        | 245.1244        | 123.0659        | 244.1404        | 122.5738        | 2  |
| 33 |           |                  |           |                  |           |                  | R | 175.1190         | 88.0631         | 158.0924        | 79.5498         |                 |                 | 1  |

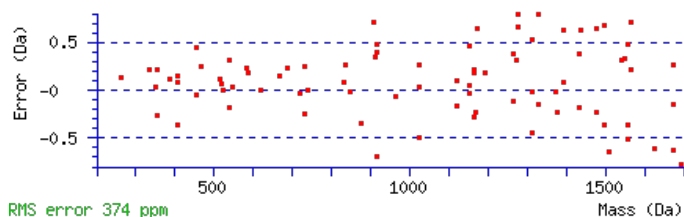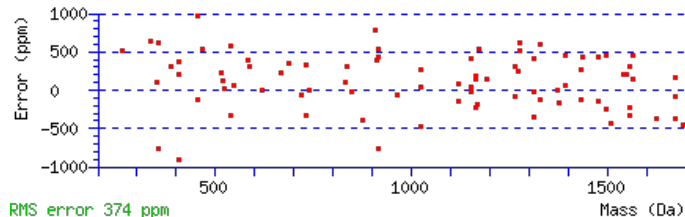

NCBI BLAST search of [DRQDGEEVLQCMPCGRPVPTPIAQNOTTLGSSR](#)

(Parameters: blastp, nr protein database, expect=20000, no filter, PAM30)

Other BLAST [web gateways](#)

All matches to this query

| Score | Mr(calc)  | Delta  | Sequence                                             | Site Analysis         |
|-------|-----------|--------|------------------------------------------------------|-----------------------|
| 81.0  | 3715.7353 | 0.0135 | <a href="#">DRQDGEEVLQCMPCGRPVPTPIAQNOTTLGSSR</a>    | Deamidated N25 47.92% |
| 78.7  | 3715.7353 | 0.0135 | <a href="#">DRQDGEEVLQCMPCGRPVPTPIAQNOTTLGSSR</a>    | Deamidated Q26 27.89% |
| 78.0  | 3715.7353 | 0.0135 | <a href="#">DRQDGEEVLQCMPCGRPVPTPIAQNOTTLGSSR</a>    | Deamidated Q24 23.69% |
| 60.5  | 3714.7513 | 0.9975 | <a href="#">DRQDGEEVLQCMPCGRPVPTPIAQNOTTLGSSR</a>    |                       |
| 59.4  | 3715.7353 | 0.0135 | <a href="#">DRQDGEEVLQCMPCGRPVPTPIAQNOTTLGSSR</a>    | Deamidated Q3 0.33%   |
| 56.7  | 3715.7353 | 0.0135 | <a href="#">DRQDGEEVLQCMPCGRPVPTPIAQNOTTLGSSR</a>    | Deamidated Q10 0.17%  |
| 6.9   | 3715.7451 | 0.0036 | <a href="#">TGLTANFGSNQLDSSGEVLQGCSPNSPVLLFQVK</a>   |                       |
| 6.1   | 3714.7611 | 0.9876 | <a href="#">VQELLEVPSPNSCGQLVEGSSDLQNSGFENATLGTK</a> |                       |
| 4.6   | 3715.7451 | 0.0036 | <a href="#">VQELLEVPSPNSCGQLVEGSSDLQNSGFENATLGTK</a> |                       |
| 4.6   | 3714.7611 | 0.9876 | <a href="#">TGLTANFGSNQLDSSGEVLQGCSPNSPVLLFQVK</a>   |                       |

Mascot: <http://www.matrixscience.com/>



# MATRIX SCIENCE Mascot Search Results

## Peptide View

MS/MS Fragmentation of **DRQDGEVVLQCMPCVGRPVTPIAQNQTTLGSSR**

Found in **Q9NZP8** in **con\_Xuniprot\_HUMAN3**, C1RL\_HUMAN Complement C1r subcomponent-like protein OS=Homo sapiens GN=C1RL PE=1 SV=2

Match to Query 28003: 3699.752296 from(925.945350,4+) intensity(19184.2441) rtinseconds(1392) scans(3445) index(24486)

Title: 111019\_Est\_MI\_YS\_G\_06Spectrum2983\_scans\_3445

Data file C:\mascot\20140703\_Tmgf\_1D\CSV\_UseAnalysis\MasterCSV\All\_Glyco\mgf\ptm\UC18ERLIC\_PTM\_35D.mgf

Click mouse within plot area to zoom in by factor of two about that point

Or, to Da

Label all possible matches Label matches used for scoring

Show Y-axis

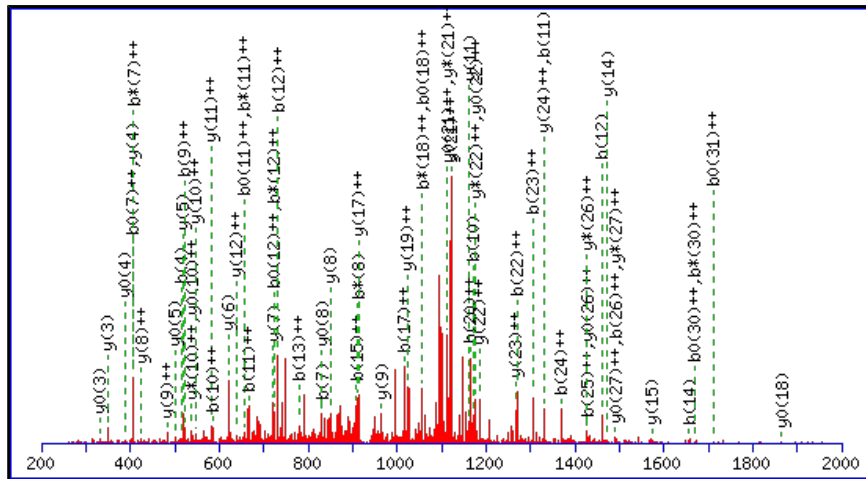

Monoisotopic mass of neutral peptide Mr(calc): 3699.7403

Fixed modifications: Carbamidomethyl (C) (apply to specified residues or termini only)

Variable modifications:

N25 : Deamidated (NQ)

Ions Score: 55 Expect: 0.00076

Matches : 67/380 fragment ions using 128 most intense peaks ([help](#))

| #  | b                | b <sup>++</sup>  | b <sup>*</sup>  | b <sup>*++</sup> | b <sup>0</sup> | b <sup>0++</sup> | Seq. | y                | y <sup>++</sup>  | y <sup>*</sup> | y <sup>*++</sup> | y <sup>0</sup>   | y <sup>0++</sup> | #  |
|----|------------------|------------------|-----------------|------------------|----------------|------------------|------|------------------|------------------|----------------|------------------|------------------|------------------|----|
| 1  | 116.0342         | 58.5207          |                 |                  | 98.0237        | 49.5155          | D    |                  |                  |                |                  |                  |                  | 33 |
| 2  | 272.1353         | 136.5713         | 255.1088        | 128.0580         | 254.1248       | 127.5660         | R    | 3585.7207        | 1793.3640        | 3568.6941      | 1784.8507        | 3567.7101        | 1784.3587        | 32 |
| 3  | 400.1939         | 200.6006         | 383.1674        | 192.0873         | 382.1833       | 191.5953         | Q    | 3429.6196        | 1715.3134        | 3412.5930      | 1706.8001        | 3411.6090        | 1706.3081        | 31 |
| 4  | <b>515.2209</b>  | 258.1141         | 498.1943        | 249.6008         | 497.2103       | 249.1088         | D    | 3301.5610        | 1651.2841        | 3284.5344      | 1642.7709        | 3283.5504        | 1642.2788        | 30 |
| 5  | 572.2423         | 286.6248         | 555.2158        | 278.1115         | 554.2318       | 277.6195         | G    | 3186.5340        | 1593.7707        | 3169.5075      | 1585.2574        | 3168.5235        | 1584.7654        | 29 |
| 6  | 701.2849         | 351.1461         | 684.2584        | 342.6328         | 683.2743       | 342.1408         | E    | 3129.5126        | 1565.2599        | 3112.4860      | 1556.7466        | 3111.5020        | 1556.2546        | 28 |
| 7  | <b>830.3275</b>  | 415.6674         | 813.3010        | <b>407.1541</b>  | 812.3169       | <b>406.6621</b>  | E    | 3000.4700        | 1500.7386        | 2983.4434      | <b>1492.2254</b> | 2982.4594        | <b>1491.7333</b> | 27 |
| 8  | 929.3959         | 465.2016         | <b>912.3694</b> | 456.6883         | 911.3854       | 456.1963         | V    | 2871.4274        | 1436.2173        | 2854.4008      | <b>1427.7041</b> | 2853.4168        | <b>1427.2120</b> | 26 |
| 9  | 1042.4800        | <b>521.7436</b>  | 1025.4534       | 513.2304         | 1024.4694      | 512.7383         | L    | 2772.3590        | 1386.6831        | 2755.3324      | 1378.1698        | 2754.3484        | 1377.6778        | 25 |
| 10 | <b>1170.5386</b> | <b>585.7729</b>  | 1153.5120       | 577.2596         | 1152.5280      | 576.7676         | Q    | 2659.2749        | <b>1330.1411</b> | 2642.2484      | 1321.6278        | 2641.2643        | 1321.1358        | 24 |
| 11 | <b>1330.5692</b> | <b>665.7882</b>  | 1313.5427       | <b>657.2750</b>  | 1312.5586      | <b>656.7830</b>  | C    | 2531.2163        | <b>1266.1118</b> | 2514.1898      | 1257.5985        | 2513.2058        | 1257.1065        | 23 |
| 12 | <b>1461.6097</b> | <b>731.3085</b>  | 1444.5831       | <b>722.7952</b>  | 1443.5991      | <b>722.3032</b>  | M    | 2371.1857        | <b>1186.0965</b> | 2354.1591      | <b>1177.5832</b> | 2353.1751        | <b>1177.0912</b> | 22 |
| 13 | 1558.6625        | <b>779.8349</b>  | 1541.6359       | 771.3216         | 1540.6519      | 770.8296         | P    | 2240.1452        | <b>1120.5762</b> | 2223.1186      | <b>1112.0630</b> | 2222.1346        | <b>1111.5710</b> | 21 |
| 14 | <b>1657.7309</b> | 829.3691         | 1640.7043       | 820.8558         | 1639.7203      | 820.3638         | V    | 2143.0924        | 1072.0499        | 2126.0659      | 1063.5366        | 2125.0819        | 1063.0446        | 20 |
| 15 | 1817.7615        | <b>909.3844</b>  | 1800.7350       | 900.8711         | 1799.7510      | 900.3791         | C    | 2044.0240        | <b>1022.5156</b> | 2026.9975      | 1014.0024        | 2026.0135        | 1013.5104        | 19 |
| 16 | 1874.7830        | 937.8951         | 1857.7564       | 929.3819         | 1856.7724      | 928.8898         | G    | 1883.9934        | 942.5003         | 1866.9668      | 933.9870         | <b>1865.9828</b> | 933.4950         | 18 |
| 17 | 2030.8841        | <b>1015.9457</b> | 2013.8575       | 1007.4324        | 2012.8735      | 1006.9404        | R    | 1826.9719        | <b>913.9896</b>  | 1809.9454      | 905.4763         | 1808.9613        | 904.9843         | 17 |
| 18 | 2127.9369        | 1064.4721        | 2110.9103       | <b>1055.9588</b> | 2109.9263      | <b>1055.4668</b> | P    | 1670.8708        | 835.9390         | 1653.8442      | 827.4258         | 1652.8602        | 826.9338         | 16 |
| 19 | 2227.0053        | 1114.0063        | 2209.9787       | 1105.4930        | 2208.9947      | 1105.0010        | V    | <b>1573.8180</b> | 787.4127         | 1556.7915      | 778.8994         | 1555.8075        | 778.4074         | 15 |
| 20 | 2328.0529        | <b>1164.5301</b> | 2311.0264       | 1156.0168        | 2310.0424      | 1155.5248        | T    | <b>1474.7496</b> | 737.8784         | 1457.7231      | 729.3652         | 1456.7390        | 728.8732         | 14 |
| 21 | 2425.1057        | 1213.0565        | 2408.0792       | 1204.5432        | 2407.0951      | 1204.0512        | P    | 1373.7019        | 687.3546         | 1356.6754      | 678.8413         | 1355.6914        | 678.3493         | 13 |
| 22 | 2538.1898        | <b>1269.5985</b> | 2521.1632       | 1261.0853        | 2520.1792      | 1260.5932        | I    | 1276.6492        | <b>638.8282</b>  | 1259.6226      | 630.3149         | 1258.6386        | 629.8229         | 12 |

|    |           |                  |           |                  |           |                  |   |                  |                 |           |                 |                 |                 |           |
|----|-----------|------------------|-----------|------------------|-----------|------------------|---|------------------|-----------------|-----------|-----------------|-----------------|-----------------|-----------|
| 23 | 2609.2269 | <b>1305.1171</b> | 2592.2003 | 1296.6038        | 2591.2163 | 1296.1118        | A | <b>1163.5651</b> | <b>582.2862</b> | 1146.5386 | 573.7729        | 1145.5545       | 573.2809        | <b>11</b> |
| 24 | 2737.2855 | <b>1369.1464</b> | 2720.2589 | 1360.6331        | 2719.2749 | 1360.1411        | Q | 1092.5280        | <b>546.7676</b> | 1075.5014 | <b>538.2544</b> | 1074.5174       | <b>537.7624</b> | <b>10</b> |
| 25 | 2852.3124 | <b>1426.6598</b> | 2835.2859 | 1418.1466        | 2834.3018 | 1417.6546        | N | <b>964.4694</b>  | <b>482.7383</b> | 947.4429  | 474.2251        | 946.4588        | 473.7331        | <b>9</b>  |
| 26 | 2980.3710 | <b>1490.6891</b> | 2963.3444 | 1482.1759        | 2962.3604 | 1481.6839        | Q | <b>849.4425</b>  | <b>425.2249</b> | 832.4159  | 416.7116        | <b>831.4319</b> | 416.2196        | <b>8</b>  |
| 27 | 3081.4187 | 1541.2130        | 3064.3921 | 1532.6997        | 3063.4081 | 1532.2077        | T | <b>721.3839</b>  | 361.1956        | 704.3573  | 352.6823        | 703.3733        | 352.1903        | <b>7</b>  |
| 28 | 3182.4663 | 1591.7368        | 3165.4398 | 1583.2235        | 3164.4558 | 1582.7315        | T | <b>620.3362</b>  | 310.6717        | 603.3097  | 302.1585        | 602.3257        | 301.6665        | <b>6</b>  |
| 29 | 3295.5504 | 1648.2788        | 3278.5239 | 1639.7656        | 3277.5398 | 1639.2736        | L | <b>519.2885</b>  | 260.1479        | 502.2620  | 251.6346        | <b>501.2780</b> | 251.1426        | <b>5</b>  |
| 30 | 3352.5719 | 1676.7896        | 3335.5453 | <b>1668.2763</b> | 3334.5613 | <b>1667.7843</b> | G | <b>406.2045</b>  | 203.6059        | 389.1779  | 195.0926        | <b>388.1939</b> | 194.6006        | <b>4</b>  |
| 31 | 3439.6039 | 1720.3056        | 3422.5774 | 1711.7923        | 3421.5933 | <b>1711.3003</b> | S | <b>349.1830</b>  | 175.0951        | 332.1565  | 166.5819        | <b>331.1724</b> | 166.0899        | <b>3</b>  |
| 32 | 3526.6359 | 1763.8216        | 3509.6094 | 1755.3083        | 3508.6254 | 1754.8163        | S | 262.1510         | 131.5791        | 245.1244  | 123.0659        | 244.1404        | 122.5738        | <b>2</b>  |
| 33 |           |                  |           |                  |           |                  | R | 175.1190         | 88.0631         | 158.0924  | 79.5498         |                 |                 | <b>1</b>  |

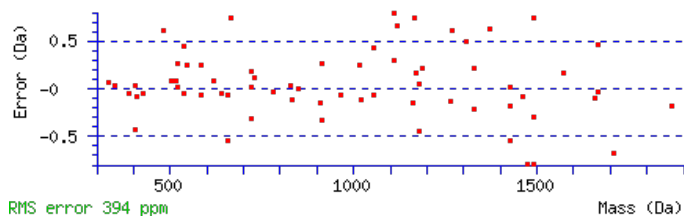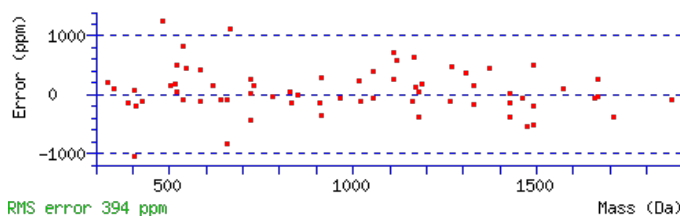

NCBI BLAST search of [DRQDGEEVLQCMPCGRPVTPIAQNQTTLGSSR](#)

(Parameters: blastp, nr protein database, expect=20000, no filter, PAM30)

Other BLAST [web gateways](#)

**All matches to this query**

| Score | Mr(calc)  | Delta   | Sequence                                             | Site Analysis         |
|-------|-----------|---------|------------------------------------------------------|-----------------------|
| 54.7  | 3699.7403 | 0.0120  | <a href="#">DRQDGEEVLQCMPCGRPVTPIAQNQTTLGSSR</a>     | Deamidated N25 45.87% |
| 52.2  | 3699.7403 | 0.0120  | <a href="#">DRQDGEEVLQCMPCGRPVTPIAQNQTTLGSSR</a>     | Deamidated Q26 25.56% |
| 51.1  | 3699.7403 | 0.0120  | <a href="#">DRQDGEEVLQCMPCGRPVTPIAQNQTTLGSSR</a>     | Deamidated Q24 19.93% |
| 46.4  | 3699.7403 | 0.0120  | <a href="#">DRQDGEEVLQCMPCGRPVTPIAQNQTTLGSSR</a>     | Deamidated Q10 6.78%  |
| 42.7  | 3698.7563 | 0.9960  | <a href="#">DRQDGEEVLQCMPCGRPVTPIAQNQTTLGSSR</a>     |                       |
| 40.8  | 3699.7403 | 0.0120  | <a href="#">DRQDGEEVLQCMPCGRPVTPIAQNQTTLGSSR</a>     | Deamidated Q3 1.85%   |
| 7.8   | 3699.7522 | 0.0001  | <a href="#">LETPIPQLSGLDHWQVGAQAVSHSGACHGQSMKR</a>   |                       |
| 5.9   | 3699.7547 | -0.0024 | <a href="#">HSSVVQGDVSEEVNIHFNSSSGGGSSAERIAIGAMK</a> |                       |
| 4.0   | 3699.7668 | -0.0145 | <a href="#">NLLLLGLARGAAGAPGPDGLDVCATCHEHATCQQR</a>  |                       |
| 4.0   | 3699.7668 | -0.0145 | <a href="#">NLLLLGLARGAAGAPGPDGLDVCATCHEHATCQQR</a>  |                       |

Mascot: <http://www.matrixscience.com/>

# MASCOT SCIENCE Mascot Search Results

## Peptide View

MS/MS Fragmentation of **SHAASDAPENLTLLAETADAR**

Found in **Q9ULI3** in **con\_Xuniprot\_HUMAN3**, HEG1\_HUMAN Protein HEG homolog 1 OS=Homo sapiens GN=HEG1 PE=1 SV=3

Match to Query 14426: 2153.030622 from(718.684150,3+) intensity(40453.0156) rtinseconds(1719) scans(4134) index(26133)

Title: 111019\_Est\_MI\_YS\_G\_08Spectrum3563\_scans\_4134

Data file C:\mascot\20140703\_Tmgf\_1D\CSV\_UseAnalysis\MasterCSV\All\_Glyco\mgf\ptm\UC18ERLIC\_PTM\_35D.mgf

Click mouse within plot area to zoom in by factor of two about that point

Or, to Da

Label all possible matches Label matches used for scoring

Show Y-axis

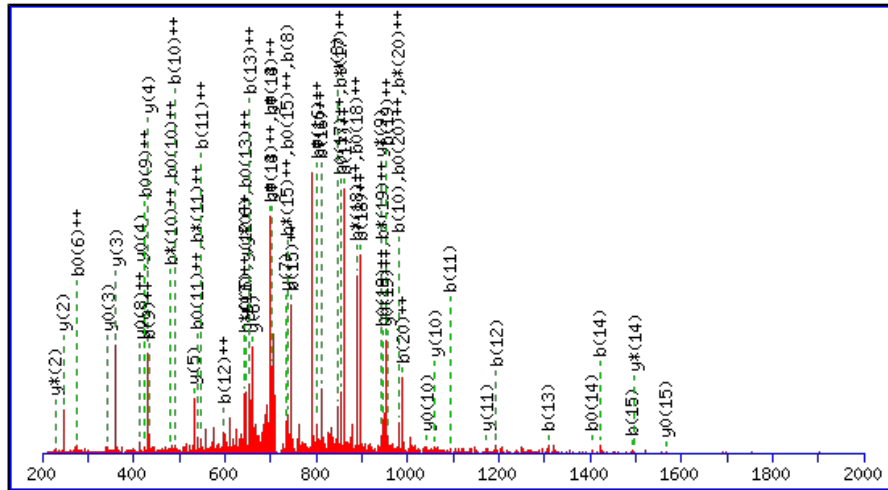

Monoisotopic mass of neutral peptide Mr(calc): 2153.0236

Fixed modifications: Carbamidomethyl (C) (apply to specified residues or termini only)

Variable modifications:

N10 : Deamidated (NQ)

Ions Score: 35 Expect: 0.078

Matches : 64/218 fragment ions using 125 most intense peaks ([help](#))

| #  | b         | b <sup>++</sup> | b*        | b <sup>+++</sup> | b <sup>0</sup> | b <sup>0++</sup> | Seq. | y         | y <sup>++</sup> | y*        | y <sup>+++</sup> | y <sup>0</sup> | y <sup>0++</sup> | #  |
|----|-----------|-----------------|-----------|------------------|----------------|------------------|------|-----------|-----------------|-----------|------------------|----------------|------------------|----|
| 1  | 88.0393   | 44.5233         |           |                  | 70.0287        | 35.5180          | S    |           |                 |           |                  |                |                  | 21 |
| 2  | 225.0982  | 113.0527        |           |                  | 207.0877       | 104.0475         | H    | 2066.9989 | 1034.0031       | 2049.9724 | 1025.4898        | 2048.9883      | 1024.9978        | 20 |
| 3  | 296.1353  | 148.5713        |           |                  | 278.1248       | 139.5660         | A    | 1929.9400 | 965.4736        | 1912.9134 | 956.9604         | 1911.9294      | 956.4684         | 19 |
| 4  | 367.1724  | 184.0899        |           |                  | 349.1619       | 175.0846         | A    | 1858.9029 | 929.9551        | 1841.8763 | 921.4418         | 1840.8923      | 920.9498         | 18 |
| 5  | 454.2045  | 227.6059        |           |                  | 436.1939       | 218.6006         | S    | 1787.8658 | 894.4365        | 1770.8392 | 885.9232         | 1769.8552      | 885.4312         | 17 |
| 6  | 569.2314  | 285.1193        |           |                  | 551.2208       | 276.1141         | D    | 1700.8337 | 850.9205        | 1683.8072 | 842.4072         | 1682.8232      | 841.9152         | 16 |
| 7  | 640.2685  | 320.6379        |           |                  | 622.2580       | 311.6326         | A    | 1585.8068 | 793.4070        | 1568.7802 | 784.8938         | 1567.7962      | 784.4018         | 15 |
| 8  | 737.3213  | 369.1643        |           |                  | 719.3107       | 360.1590         | P    | 1514.7697 | 757.8885        | 1497.7431 | 749.3752         | 1496.7591      | 748.8832         | 14 |
| 9  | 866.3639  | 433.6856        |           |                  | 848.3533       | 424.6803         | E    | 1417.7169 | 709.3621        | 1400.6904 | 700.8488         | 1399.7064      | 700.3568         | 13 |
| 10 | 981.3908  | 491.1991        | 964.3643  | 482.6858         | 963.3803       | 482.1938         | N    | 1288.6743 | 644.8408        | 1271.6478 | 636.3275         | 1270.6638      | 635.8355         | 12 |
| 11 | 1094.4749 | 547.7411        | 1077.4483 | 539.2278         | 1076.4643      | 538.7358         | L    | 1173.6474 | 587.3273        | 1156.6208 | 578.8141         | 1155.6368      | 578.3220         | 11 |
| 12 | 1195.5226 | 598.2649        | 1178.4960 | 589.7516         | 1177.5120      | 589.2596         | T    | 1060.5633 | 530.7853        | 1043.5368 | 522.2720         | 1042.5528      | 521.7800         | 10 |
| 13 | 1308.6066 | 654.8070        | 1291.5801 | 646.2937         | 1290.5961      | 645.8017         | L    | 959.5156  | 480.2615        | 942.4891  | 471.7482         | 941.5051       | 471.2562         | 9  |
| 14 | 1421.6907 | 711.3490        | 1404.6642 | 702.8357         | 1403.6801      | 702.3437         | L    | 846.4316  | 423.7194        | 829.4050  | 415.2062         | 828.4210       | 414.7141         | 8  |
| 15 | 1492.7278 | 746.8675        | 1475.7013 | 738.3543         | 1474.7172      | 737.8623         | A    | 733.3475  | 367.1774        | 716.3210  | 358.6641         | 715.3369       | 358.1721         | 7  |
| 16 | 1621.7704 | 811.3888        | 1604.7439 | 802.8756         | 1603.7598      | 802.3836         | E    | 662.3104  | 331.6588        | 645.2838  | 323.1456         | 644.2998       | 322.6536         | 6  |
| 17 | 1722.8181 | 861.9127        | 1705.7915 | 853.3994         | 1704.8075      | 852.9074         | T    | 533.2678  | 267.1375        | 516.2413  | 258.6243         | 515.2572       | 258.1323         | 5  |
| 18 | 1793.8552 | 897.4312        | 1776.8287 | 888.9180         | 1775.8446      | 888.4260         | A    | 432.2201  | 216.6137        | 415.1936  | 208.1004         | 414.2096       | 207.6084         | 4  |
| 19 | 1908.8821 | 954.9447        | 1891.8556 | 946.4314         | 1890.8716      | 945.9394         | D    | 361.1830  | 181.0951        | 344.1565  | 172.5819         | 343.1724       | 172.0899         | 3  |
| 20 | 1979.9193 | 990.4633        | 1962.8927 | 981.9500         | 1961.9087      | 981.4580         | A    | 246.1561  | 123.5817        | 229.1295  | 115.0684         |                |                  | 2  |
| 21 |           |                 |           |                  |                |                  | R    | 175.1190  | 88.0631         | 158.0924  | 79.5498          |                |                  | 1  |

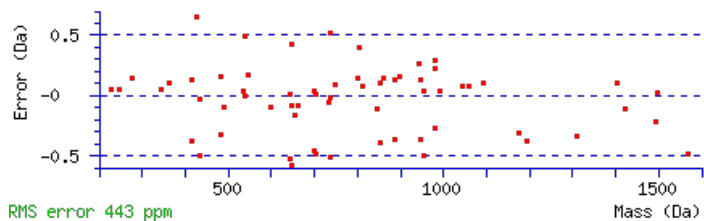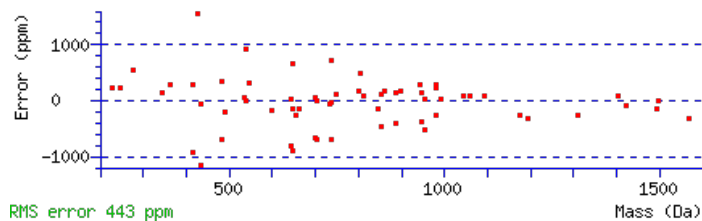

NCBI **BLAST** search of [SHAASDAPENLTLLAETADAR](#)  
 (Parameters: blastp, nr protein database, expect=20000, no filter, PAM30)  
 Other BLAST [web gateways](#)

**All matches to this query**

| Score | Mr(calc)  | Delta  | Sequence                              |
|-------|-----------|--------|---------------------------------------|
| 35.0  | 2153.0236 | 0.0070 | <a href="#">SHAASDAPENLTLLAETADAR</a> |
| 13.7  | 2151.0232 | 2.0074 | <a href="#">IFPARSNGNEDLEYLADAR</a>   |
| 10.3  | 2151.0232 | 2.0074 | <a href="#">FVQLKNNSDKDQSLGNWR</a>    |
| 10.3  | 2151.0232 | 2.0074 | <a href="#">FVQLKNNSDKDQSLGNWR</a>    |
| 7.8   | 2151.0232 | 2.0074 | <a href="#">IFPARSNGNEDLEYLADAR</a>   |
| 6.8   | 2151.0154 | 2.0153 | <a href="#">EIQSVYIREGMGQLVAANDG</a>  |
| 5.5   | 2152.0219 | 1.0087 | <a href="#">QMDPTDFVNSSETRLAVSR</a>   |
| 5.3   | 2151.0187 | 2.0119 | <a href="#">ETENRKIMGQCEALITEK</a>    |
| 5.1   | 2153.0231 | 0.0075 | <a href="#">SQKMEIESVLMKQONLQT</a>    |
| 4.7   | 2153.0211 | 0.0095 | <a href="#">SDPMVVLYTQSRASQEW</a>     |

Mascot: <http://www.matrixscience.com/>

# MATRIX SCIENCE Mascot Search Results

## Peptide View

MS/MS Fragmentation of **ANQQLNFTEAK**

Found in **Q9Y5Y7** in **con\_Xuniprot\_HUMAN3**, LYVE1\_HUMAN Lymphatic vessel endothelial hyaluronic acid receptor 1 OS=Homo sapiens GN=LYVE1 PE=1 SV=2

Match to Query 1765: 1263.61808 from(632.813180,2+) intensity(14774.6035) rtinseconds(580) scans(1342) index(23789)

Title: 111019\_Est\_MI\_YS\_G\_05Spectrum1122\_scans\_\_1342

Data file C:\mascot\20140703\_Tmgf\_1D\CSV\_UseAnalysis\MasterCSV\All\_Glyco\mgf\ptm\UC18ERLIC\_PTM\_35D.mgf

Click mouse within plot area to zoom in by factor of two about that point

Or, to Da

Label all possible matches Label matches used for scoring

Show Y-axis

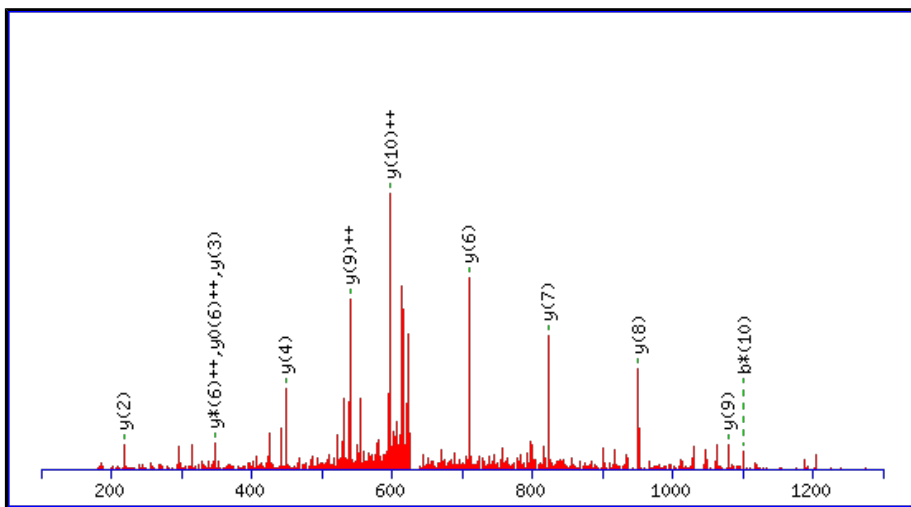

Monoisotopic mass of neutral peptide **Mr(calc)**: 1263.6095

Fixed modifications: Carbamidomethyl (C) (apply to specified residues or termini only)

Variable modifications:

N6 : Deamidated (NQ)

Ions Score: 61 Expect: 0.00017

Matches : 12/100 fragment ions using 11 most intense peaks ([help](#))

| #  | b         | b <sup>++</sup> | b <sup>*</sup> | b <sup>*++</sup> | b <sup>0</sup> | b <sup>0++</sup> | Seq. | y         | y <sup>++</sup> | y <sup>*</sup> | y <sup>*++</sup> | y <sup>0</sup> | y <sup>0++</sup> | #  |
|----|-----------|-----------------|----------------|------------------|----------------|------------------|------|-----------|-----------------|----------------|------------------|----------------|------------------|----|
| 1  | 72.0444   | 36.5258         |                |                  |                |                  | A    |           |                 |                |                  |                |                  | 11 |
| 2  | 186.0873  | 93.5473         | 169.0608       | 85.0340          |                |                  | N    | 1193.5797 | 597.2935        | 1176.5531      | 588.7802         | 1175.5691      | 588.2882         | 10 |
| 3  | 314.1459  | 157.5766        | 297.1193       | 149.0633         |                |                  | Q    | 1079.5368 | 540.2720        | 1062.5102      | 531.7587         | 1061.5262      | 531.2667         | 9  |
| 4  | 442.2045  | 221.6059        | 425.1779       | 213.0926         |                |                  | Q    | 951.4782  | 476.2427        | 934.4516       | 467.7295         | 933.4676       | 467.2374         | 8  |
| 5  | 555.2885  | 278.1479        | 538.2620       | 269.6346         |                |                  | L    | 823.4196  | 412.2134        | 806.3931       | 403.7002         | 805.4090       | 403.2082         | 7  |
| 6  | 670.3155  | 335.6614        | 653.2889       | 327.1481         |                |                  | N    | 710.3355  | 355.6714        | 693.3090       | 347.1581         | 692.3250       | 346.6661         | 6  |
| 7  | 817.3839  | 409.1956        | 800.3573       | 400.6823         |                |                  | F    | 595.3086  | 298.1579        | 578.2821       | 289.6447         | 577.2980       | 289.1527         | 5  |
| 8  | 918.4316  | 459.7194        | 901.4050       | 451.2061         | 900.4210       | 450.7141         | T    | 448.2402  | 224.6237        | 431.2136       | 216.1105         | 430.2296       | 215.6185         | 4  |
| 9  | 1047.4742 | 524.2407        | 1030.4476      | 515.7274         | 1029.4636      | 515.2354         | E    | 347.1925  | 174.0999        | 330.1660       | 165.5866         | 329.1819       | 165.0946         | 3  |
| 10 | 1118.5113 | 559.7593        | 1101.4847      | 551.2460         | 1100.5007      | 550.7540         | A    | 218.1499  | 109.5786        | 201.1234       | 101.0653         |                |                  | 2  |
| 11 |           |                 |                |                  |                |                  | K    | 147.1128  | 74.0600         | 130.0863       | 65.5468          |                |                  | 1  |

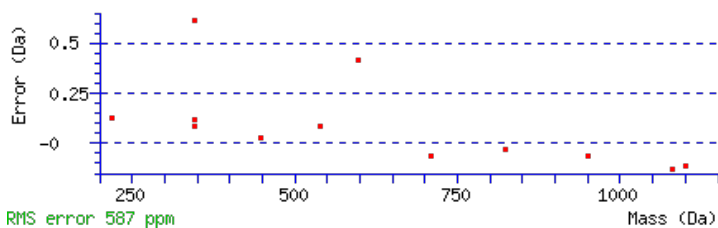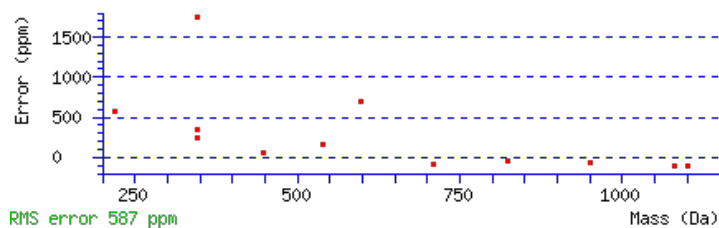

NCBI BLAST search of [ANQQLNFTEAK](#)

(Parameters: blastp, nr protein database, expect=20000, no filter, PAM30)

Other BLAST [web gateways](#)

**All matches to this query**

| Score | Mr(calc)  | Delta   | Sequence                     | Site Analysis        |
|-------|-----------|---------|------------------------------|----------------------|
| 60.5  | 1263.6095 | 0.0023  | <a href="#">ANQQLNFTEAK</a>  | Deamidated N6 99.85% |
| 31.0  | 1263.6095 | 0.0023  | <a href="#">ANQQLNFTEAK</a>  | Deamidated Q4 0.11%  |
| 25.8  | 1263.6095 | 0.0023  | <a href="#">ANQQLNFTEAK</a>  | Deamidated Q3 0.03%  |
| 17.0  | 1263.6095 | 0.0023  | <a href="#">ANQQLNFTEAK</a>  | Deamidated N2 0.00%  |
| 4.8   | 1263.6095 | 0.0023  | <a href="#">EPTNIYVASDR</a>  |                      |
| 3.6   | 1263.6129 | -0.0010 | <a href="#">KLDEEMREAK</a>   |                      |
| 3.5   | 1263.6064 | 0.0055  | <a href="#">ADPDRLMRMK</a>   |                      |
| 2.2   | 1262.6102 | 1.0016  | <a href="#">RNPDSVSSVSSK</a> |                      |
| 1.0   | 1262.6077 | 1.0041  | <a href="#">VNYHMLTNVR</a>   |                      |

Mascot: <http://www.matrixscience.com/>

# MATRIX SCIENCE Mascot Search Results

## Peptide View

MS/MS Fragmentation of **YLPVNSSLTSDCSER**

Found in **Q9Y6R7** in **con\_Xuniprot\_HUMAN3**, FCGBP\_HUMAN IgGFC-binding protein OS=Homo sapiens GN=FCGBP PE=1 SV=3

Match to Query 10927: 1840.857388 from(921.435970,2+) intensity(65188.9609) rtinseconds(1532) scans(3290) index(99)

Title: 111019\_Est\_ISCardio\_NMI\_200000g\_G\_3Spectrum2842\_scans\_3290

Data file C:\\mascot\\20140703\_Tmgf\_1D\\CSV\_UseAnalysis\\MasterCSV\\All\_Glyco\\mgf\\ptm\\UC18ERLIC\_PTM\_35D.mgf

Click mouse within plot area to zoom in by factor of two about that point

Or, to Da

Label all possible matches Label matches used for scoring

Show Y-axis

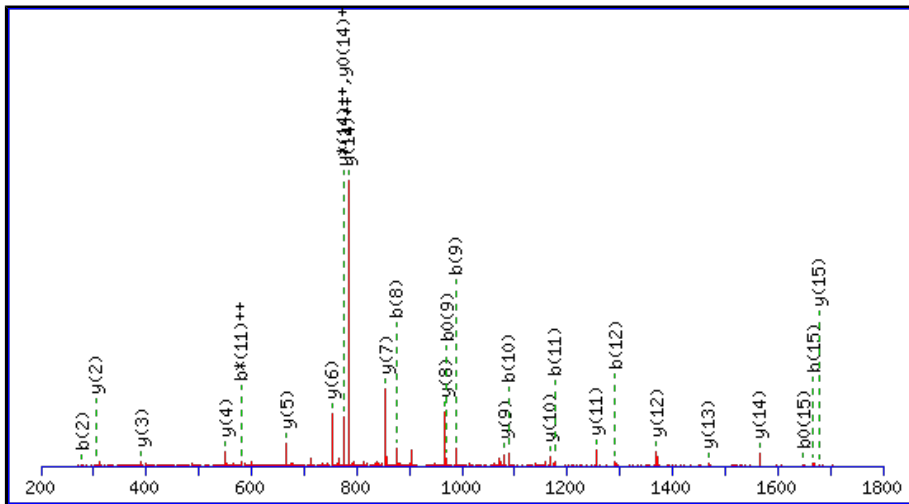

Monoisotopic mass of neutral peptide  $M_r(\text{calc})$ : 1840.8513

Fixed modifications: Carbamidomethyl (C) (apply to specified residues or termini only)

Variable modifications:

N5 : Deamidated (NQ)

Ions Score: 106 Expect: 5.3e-009

Matches : 27/160 fragment ions using 45 most intense peaks ([help](#))

| #  | b                | b <sup>++</sup> | b <sup>*</sup> | b <sup>*++</sup> | b <sup>0</sup>   | b <sup>0++</sup> | Seq. | y                | y <sup>++</sup> | y <sup>*</sup> | y <sup>*++</sup> | y <sup>0</sup> | y <sup>0++</sup> | #  |
|----|------------------|-----------------|----------------|------------------|------------------|------------------|------|------------------|-----------------|----------------|------------------|----------------|------------------|----|
| 1  | 164.0706         | 82.5389         |                |                  |                  |                  | Y    |                  |                 |                |                  |                |                  | 16 |
| 2  | <b>277.1547</b>  | 139.0810        |                |                  |                  |                  | L    | <b>1678.7952</b> | 839.9013        | 1661.7687      | 831.3880         | 1660.7847      | 830.8960         | 15 |
| 3  | 374.2074         | 187.6074        |                |                  |                  |                  | P    | <b>1565.7112</b> | <b>783.3592</b> | 1548.6846      | <b>774.8460</b>  | 1547.7006      | <b>774.3539</b>  | 14 |
| 4  | 473.2758         | 237.1416        |                |                  |                  |                  | V    | <b>1468.6584</b> | 734.8328        | 1451.6319      | 726.3196         | 1450.6478      | 725.8276         | 13 |
| 5  | 588.3028         | 294.6550        | 571.2762       | 286.1418         |                  |                  | N    | <b>1369.5900</b> | 685.2986        | 1352.5635      | 676.7854         | 1351.5794      | 676.2934         | 12 |
| 6  | 675.3348         | 338.1710        | 658.3083       | 329.6578         | 657.3243         | 329.1658         | S    | <b>1254.5631</b> | 627.7852        | 1237.5365      | 619.2719         | 1236.5525      | 618.7799         | 11 |
| 7  | 762.3668         | 381.6871        | 745.3403       | 373.1738         | 744.3563         | 372.6818         | S    | <b>1167.5310</b> | 584.2692        | 1150.5045      | 575.7559         | 1149.5205      | 575.2639         | 10 |
| 8  | <b>875.4509</b>  | 438.2291        | 858.4244       | 429.7158         | 857.4403         | 429.2238         | L    | <b>1080.4990</b> | 540.7531        | 1063.4725      | 532.2399         | 1062.4884      | 531.7479         | 9  |
| 9  | <b>988.5350</b>  | 494.7711        | 971.5084       | 486.2579         | <b>970.5244</b>  | 485.7658         | L    | <b>967.4149</b>  | 484.2111        | 950.3884       | 475.6978         | 949.4044       | 475.2058         | 8  |
| 10 | <b>1089.5827</b> | 545.2950        | 1072.5561      | 536.7817         | 1071.5721        | 536.2897         | T    | <b>854.3309</b>  | 427.6691        | 837.3043       | 419.1558         | 836.3203       | 418.6638         | 7  |
| 11 | <b>1176.6147</b> | 588.8110        | 1159.5881      | <b>580.2977</b>  | 1158.6041        | 579.8057         | S    | <b>753.2832</b>  | 377.1452        | 736.2566       | 368.6320         | 735.2726       | 368.1400         | 6  |
| 12 | <b>1291.6416</b> | 646.3245        | 1274.6151      | 637.8112         | 1273.6311        | 637.3192         | D    | <b>666.2512</b>  | 333.6292        | 649.2246       | 325.1159         | 648.2406       | 324.6239         | 5  |
| 13 | 1451.6723        | 726.3398        | 1434.6457      | 717.8265         | 1433.6617        | 717.3345         | C    | <b>551.2242</b>  | 276.1157        | 534.1977       | 267.6025         | 533.2137       | 267.1105         | 4  |
| 14 | 1538.7043        | 769.8558        | 1521.6778      | 761.3425         | 1520.6937        | 760.8505         | S    | <b>391.1936</b>  | 196.1004        | 374.1670       | 187.5871         | 373.1830       | 187.0951         | 3  |
| 15 | <b>1667.7469</b> | 834.3771        | 1650.7203      | 825.8638         | <b>1649.7363</b> | 825.3718         | E    | <b>304.1615</b>  | 152.5844        | 287.1350       | 144.0711         | 286.1510       | 143.5791         | 2  |
| 16 |                  |                 |                |                  |                  |                  | R    | 175.1190         | 88.0631         | 158.0924       | 79.5498          |                |                  | 1  |



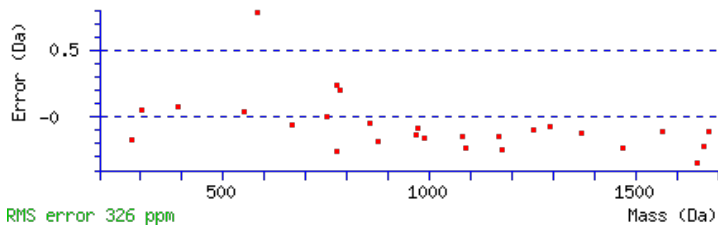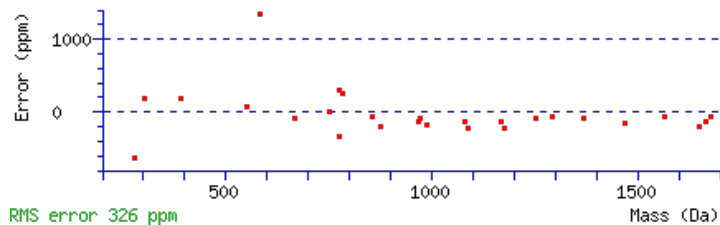

NCBI **BLAST** search of [YLPVNSSLTSDCSER](#)

(Parameters: blastp, nr protein database, expect=20000, no filter, PAM30)

Other BLAST [web gateways](#)

**All matches to this query**

| Score | Mr(calc)  | Delta   | Sequence                          |
|-------|-----------|---------|-----------------------------------|
| 105.6 | 1840.8513 | 0.0061  | <a href="#">YLPVNSSLTSDCSER</a>   |
| 11.1  | 1840.8625 | -0.0051 | <a href="#">VLMIDNRHDKNPLSNG</a>  |
| 10.0  | 1840.8486 | 0.0088  | <a href="#">GMSHSPSVALRGNENER</a> |
| 10.0  | 1840.8486 | 0.0088  | <a href="#">GMSHSPSVALRGNENER</a> |
| 9.0   | 1840.8488 | 0.0086  | <a href="#">VLWSPQAAMREMYDK</a>   |
| 7.9   | 1840.8488 | 0.0086  | <a href="#">VLWSPQAAMREMYDK</a>   |
| 3.3   | 1840.8513 | 0.0061  | <a href="#">LGPQLPSCQPQVEQTR</a>  |
| 2.4   | 1840.8631 | -0.0057 | <a href="#">YFYKVHQLEQEQAR</a>    |
| 2.3   | 1839.8607 | 0.9966  | <a href="#">NGLCRNLVCTDLFTR</a>   |
| 1.9   | 1840.8521 | 0.0053  | <a href="#">ALKAMEMTWNMEKK</a>    |

Mascot: <http://www.matrixscience.com/>

# MASCOT SCIENCE Mascot Search Results

## Peptide View

MS/MS Fragmentation of **LLISLSESPASVSILSQADNTSK**

Found in **Q9Y6R7** in **con\_Xuniprot\_HUMAN3**, FCGBP\_HUMAN IgGfc-binding protein OS=Homo sapiens GN=FCGBP PE=1 SV=3

Match to Query 21512: 2447.271848 from(1224.643200,2+) intensity(15055.8242) rtinseconds(1998) scans(5210) index(6582)

Title: 111019\_Est\_ISCardio\_NMI\_YP\_G\_9Spectrum4581\_scans\_5210

Data file C:\mascot\20140703\_Tmgf\_1D\CSV\_UseAnalysis\MasterCSV\All\_Glyco\mgf\ptm\UC18ERLIC\_PTM\_35D.mgf

Click mouse within plot area to zoom in by factor of two about that point

Or,  to  Da

Label all possible matches  Label matches used for scoring

Show Y-axis

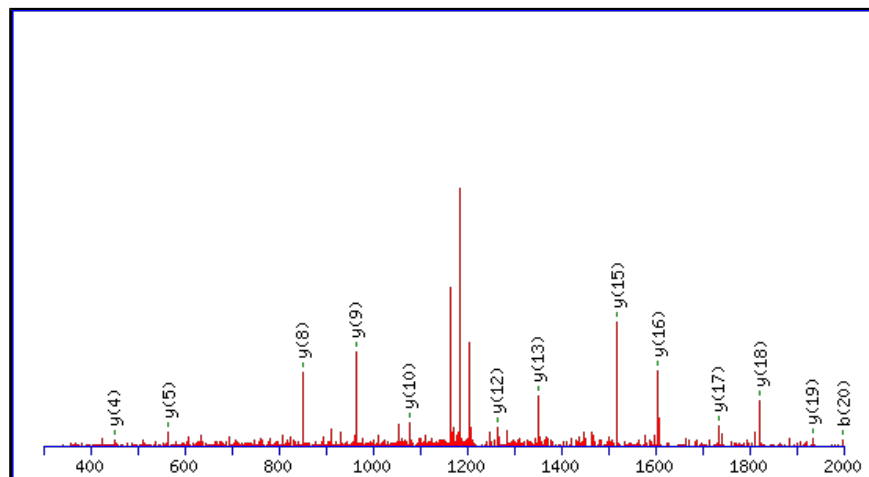

Monoisotopic mass of neutral peptide Mr(calc): 2447.2642

Fixed modifications: Carbamidomethyl (C) (apply to specified residues or termini only)

Variable modifications:

N21 : Deamidated (NQ)

Ions Score: 91 Expect: 1.9e-007

Matches : 13/234 fragment ions using 17 most intense peaks ([help](#))

| #  | b                | b <sup>++</sup> | b*        | b <sup>*++</sup> | b <sup>0</sup> | b <sup>0++</sup> | Seq. | y                | y <sup>++</sup> | y*        | y <sup>*++</sup> | y <sup>0</sup> | y <sup>0++</sup> | #  |
|----|------------------|-----------------|-----------|------------------|----------------|------------------|------|------------------|-----------------|-----------|------------------|----------------|------------------|----|
| 1  | 114.0913         | 57.5493         |           |                  |                |                  | L    |                  |                 |           |                  |                |                  | 24 |
| 2  | 227.1754         | 114.0913        |           |                  |                |                  | L    | 2335.1875        | 1168.0974       | 2318.1609 | 1159.5841        | 2317.1769      | 1159.0921        | 23 |
| 3  | 340.2595         | 170.6334        |           |                  |                |                  | I    | 2222.1034        | 1111.5554       | 2205.0769 | 1103.0421        | 2204.0929      | 1102.5501        | 22 |
| 4  | 427.2915         | 214.1494        |           |                  | 409.2809       | 205.1441         | S    | 2109.0194        | 1055.0133       | 2091.9928 | 1046.5000        | 2091.0088      | 1046.0080        | 21 |
| 5  | 514.3235         | 257.6654        |           |                  | 496.3130       | 248.6601         | S    | 2021.9873        | 1011.4973       | 2004.9608 | 1002.9840        | 2003.9768      | 1002.4920        | 20 |
| 6  | 627.4076         | 314.2074        |           |                  | 609.3970       | 305.2021         | L    | <b>1934.9553</b> | 967.9813        | 1917.9288 | 959.4680         | 1916.9447      | 958.9760         | 19 |
| 7  | 714.4396         | 357.7234        |           |                  | 696.4291       | 348.7182         | S    | <b>1821.8712</b> | 911.4393        | 1804.8447 | 902.9260         | 1803.8607      | 902.4340         | 18 |
| 8  | 843.4822         | 422.2447        |           |                  | 825.4716       | 413.2395         | E    | <b>1734.8392</b> | 867.9232        | 1717.8127 | 859.4100         | 1716.8286      | 858.9180         | 17 |
| 9  | 930.5142         | 465.7608        |           |                  | 912.5037       | 456.7555         | S    | <b>1605.7966</b> | 803.4019        | 1588.7701 | 794.8887         | 1587.7861      | 794.3967         | 16 |
| 10 | 1027.5670        | 514.2871        |           |                  | 1009.5564      | 505.2819         | P    | <b>1518.7646</b> | 759.8859        | 1501.7380 | 751.3727         | 1500.7540      | 750.8807         | 15 |
| 11 | 1098.6041        | 549.8057        |           |                  | 1080.5935      | 540.8004         | A    | 1421.7118        | 711.3596        | 1404.6853 | 702.8463         | 1403.7013      | 702.3543         | 14 |
| 12 | 1185.6361        | 593.3217        |           |                  | 1167.6256      | 584.3164         | S    | <b>1350.6747</b> | 675.8410        | 1333.6482 | 667.3277         | 1332.6641      | 666.8357         | 13 |
| 13 | 1284.7046        | 642.8559        |           |                  | 1266.6940      | 633.8506         | V    | <b>1263.6427</b> | 632.3250        | 1246.6161 | 623.8117         | 1245.6321      | 623.3197         | 12 |
| 14 | 1371.7366        | 686.3719        |           |                  | 1353.7260      | 677.3666         | S    | 1164.5743        | 582.7908        | 1147.5477 | 574.2775         | 1146.5637      | 573.7855         | 11 |
| 15 | 1484.8206        | 742.9140        |           |                  | 1466.8101      | 733.9087         | I    | <b>1077.5422</b> | 539.2748        | 1060.5157 | 530.7615         | 1059.5317      | 530.2695         | 10 |
| 16 | 1597.9047        | 799.4560        |           |                  | 1579.8941      | 790.4507         | L    | <b>964.4582</b>  | 482.7327        | 947.4316  | 474.2195         | 946.4476       | 473.7274         | 9  |
| 17 | 1684.9367        | 842.9720        |           |                  | 1666.9262      | 833.9667         | S    | <b>851.3741</b>  | 426.1907        | 834.3476  | 417.6774         | 833.3636       | 417.1854         | 8  |
| 18 | 1812.9953        | 907.0013        | 1795.9688 | 898.4880         | 1794.9848      | 897.9960         | Q    | 764.3421         | 382.6747        | 747.3155  | 374.1614         | 746.3315       | 373.6694         | 7  |
| 19 | 1884.0324        | 942.5199        | 1867.0059 | 934.0066         | 1866.0219      | 933.5146         | A    | 636.2835         | 318.6454        | 619.2570  | 310.1321         | 618.2729       | 309.6401         | 6  |
| 20 | <b>1999.0594</b> | 1000.0333       | 1982.0328 | 991.5201         | 1981.0488      | 991.0280         | D    | <b>565.2464</b>  | 283.1268        | 548.2198  | 274.6136         | 547.2358       | 274.1216         | 5  |
| 21 | 2114.0863        | 1057.5468       | 2097.0598 | 1049.0335        | 2096.0758      | 1048.5415        | N    | <b>450.2195</b>  | 225.6134        | 433.1929  | 217.1001         | 432.2089       | 216.6081         | 4  |
| 22 | 2215.1340        | 1108.0706       | 2198.1074 | 1099.5574        | 2197.1234      | 1099.0654        | T    | 335.1925         | 168.0999        | 318.1660  | 159.5866         | 317.1819       | 159.0946         | 3  |
| 23 | 2302.1660        | 1151.5867       | 2285.1395 | 1143.0734        | 2284.1555      | 1142.5814        | S    | 234.1448         | 117.5761        | 217.1183  | 109.0628         | 216.1343       | 108.5708         | 2  |

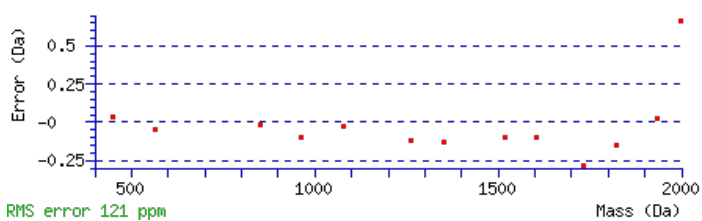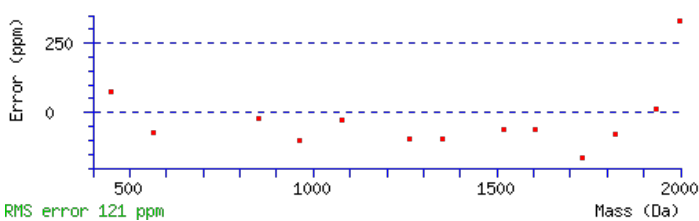

NCBI **BLAST** search of [LLISSLSESPASVSILSQADNTSK](#)

(Parameters: blastp, nr protein database, expect=20000, no filter, PAM30)

Other BLAST [web gateways](#)

**All matches to this query**

| Score | Mr(calc)  | Delta   | Sequence                                 | Site Analysis         |
|-------|-----------|---------|------------------------------------------|-----------------------|
| 90.6  | 2447.2642 | 0.0076  | <a href="#">LLISSLSESPASVSILSQADNTSK</a> | Deamidated N21 99.87% |
| 61.6  | 2447.2642 | 0.0076  | <a href="#">LLISSLSESPASVSILSQADNTSK</a> | Deamidated Q18 0.13%  |
| 20.0  | 2446.2802 | 0.9916  | <a href="#">LLISSLSESPASVSILSQADNTSK</a> |                       |
| 4.1   | 2447.2703 | 0.0016  | <a href="#">QRAHVIVMAATNRPNSIDPALR</a>   |                       |
| 4.0   | 2447.2617 | 0.0101  | <a href="#">RWKLINEALEETETVLIDMK</a>     |                       |
| 0.2   | 2447.2703 | 0.0016  | <a href="#">QRAHVIVMAATNRPNSIDPALR</a>   |                       |
| 0.2   | 2447.2703 | 0.0016  | <a href="#">QRAHVIVMAATNRPNSIDPALR</a>   |                       |
| 0.0   | 2447.2804 | -0.0085 | <a href="#">LVWLKEVLQNELLTMSQVMR</a>     |                       |

Mascot: <http://www.matrixscience.com/>

# MASCOT SCIENCE Mascot Search Results

## Peptide View

MS/MS Fragmentation of **GLCVLSVGANLTTFDGAR**

Found in **Q9Y6R7** in **con\_Xuniprot\_HUMAN3**, FCGBP\_HUMAN IgGFC-binding protein OS=Homo sapiens GN=FCGBP PE=1 SV=3

Match to Query 10958: 1850.924268 from(926.469410,2+) intensity(33367.8008) rtinseconds(2232) scans(5627) index(921)

Title: 111019\_Est\_ISCardio\_NMI\_YP\_G\_2Spectrum4914\_scans\_5627

Data file C:\\mascot\\20140703\_Tmfg\_1D\\CSV\_UseAnalysis\\MasterCSV\\All\_Glyco\\mgf\\ptm\\UC18ERLIC\_PTM\_35D.mgf

Click mouse within plot area to zoom in by factor of two about that point

Or, to Da

Label all possible matches Label matches used for scoring

Show Y-axis

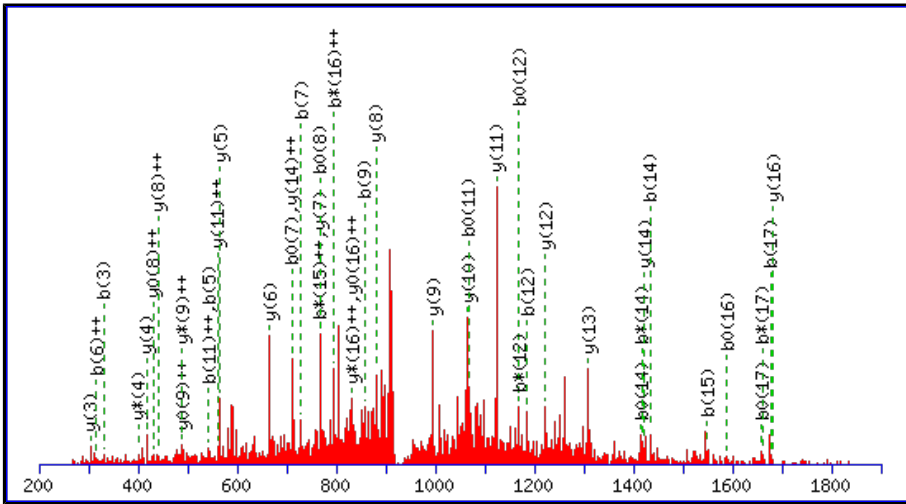

Monoisotopic mass of neutral peptide Mr(calc): 1850.9197

Fixed modifications: Carbamidomethyl (C) (apply to specified residues or termini only)

Variable modifications:

N10 : Deamidated (NQ)

Ions Score: 52 Expect: 0.0018

Matches : 44/170 fragment ions using 112 most intense peaks (help)

| #  | b                | b <sup>++</sup> | b <sup>*</sup>   | b <sup>*++</sup> | b <sup>0</sup>   | b <sup>0++</sup> | Seq.     | y                | y <sup>++</sup> | y <sup>*</sup>  | y <sup>*++</sup> | y <sup>0</sup> | y <sup>0++</sup> | #         |
|----|------------------|-----------------|------------------|------------------|------------------|------------------|----------|------------------|-----------------|-----------------|------------------|----------------|------------------|-----------|
| 1  | 58.0287          | 29.5180         |                  |                  |                  |                  | <b>G</b> |                  |                 |                 |                  |                |                  | <b>18</b> |
| 2  | 171.1128         | 86.0600         |                  |                  |                  |                  | <b>L</b> | 1794.9055        | 897.9564        | 1777.8789       | 889.4431         | 1776.8949      | 888.9511         | <b>17</b> |
| 3  | <b>331.1435</b>  | 166.0754        |                  |                  |                  |                  | <b>C</b> | <b>1681.8214</b> | 841.4143        | 1664.7949       | <b>832.9011</b>  | 1663.8108      | <b>832.4091</b>  | <b>16</b> |
| 4  | 430.2119         | 215.6096        |                  |                  |                  |                  | <b>V</b> | 1521.7907        | 761.3990        | 1504.7642       | 752.8857         | 1503.7802      | 752.3937         | <b>15</b> |
| 5  | <b>543.2959</b>  | 272.1516        |                  |                  |                  |                  | <b>L</b> | <b>1422.7223</b> | <b>711.8648</b> | 1405.6958       | 703.3515         | 1404.7118      | 702.8595         | <b>14</b> |
| 6  | 630.3280         | <b>315.6676</b> |                  |                  | 612.3174         | 306.6623         | <b>S</b> | <b>1309.6383</b> | 655.3228        | 1292.6117       | 646.8095         | 1291.6277      | 646.3175         | <b>13</b> |
| 7  | <b>729.3964</b>  | 365.2018        |                  |                  | <b>711.3858</b>  | 356.1965         | <b>V</b> | <b>1222.6062</b> | 611.8068        | 1205.5797       | 603.2935         | 1204.5957      | 602.8015         | <b>12</b> |
| 8  | 786.4178         | 393.7126        |                  |                  | <b>768.4073</b>  | 384.7073         | <b>G</b> | <b>1123.5378</b> | <b>562.2726</b> | 1106.5113       | 553.7593         | 1105.5273      | 553.2673         | <b>11</b> |
| 9  | <b>857.4550</b>  | 429.2311        |                  |                  | 839.4444         | 420.2258         | <b>A</b> | <b>1066.5164</b> | 533.7618        | 1049.4898       | 525.2485         | 1048.5058      | 524.7565         | <b>10</b> |
| 10 | 972.4819         | 486.7446        | 955.4553         | 478.2313         | 954.4713         | 477.7393         | <b>N</b> | <b>995.4793</b>  | 498.2433        | 978.4527        | <b>489.7300</b>  | 977.4687       | <b>489.2380</b>  | <b>9</b>  |
| 11 | 1085.5660        | <b>543.2866</b> | 1068.5394        | 534.7733         | <b>1067.5554</b> | 534.2813         | <b>L</b> | <b>880.4523</b>  | <b>440.7298</b> | 863.4258        | 432.2165         | 862.4417       | <b>431.7245</b>  | <b>8</b>  |
| 12 | <b>1186.6136</b> | 593.8105        | <b>1169.5871</b> | 585.2972         | <b>1168.6031</b> | 584.8052         | <b>T</b> | <b>767.3682</b>  | 384.1878        | 750.3417        | 375.6745         | 749.3577       | 375.1825         | <b>7</b>  |
| 13 | 1287.6613        | 644.3343        | 1270.6348        | 635.8210         | 1269.6508        | 635.3290         | <b>T</b> | <b>666.3206</b>  | 333.6639        | 649.2940        | 325.1506         | 648.3100       | 324.6586         | <b>6</b>  |
| 14 | <b>1434.7297</b> | 717.8685        | <b>1417.7032</b> | 709.3552         | <b>1416.7192</b> | 708.8632         | <b>F</b> | <b>565.2729</b>  | 283.1401        | 548.2463        | 274.6268         | 547.2623       | 274.1348         | <b>5</b>  |
| 15 | <b>1549.7567</b> | 775.3820        | 1532.7301        | <b>766.8687</b>  | 1531.7461        | 766.3767         | <b>D</b> | <b>418.2045</b>  | 209.6059        | <b>401.1779</b> | 201.0926         | 400.1939       | 200.6006         | <b>4</b>  |
| 16 | 1606.7781        | 803.8927        | 1589.7516        | <b>795.3794</b>  | <b>1588.7676</b> | 794.8874         | <b>G</b> | <b>303.1775</b>  | 152.0924        | 286.1510        | 143.5791         |                |                  | <b>3</b>  |
| 17 | <b>1677.8153</b> | 839.4113        | <b>1660.7887</b> | 830.8980         | <b>1659.8047</b> | 830.4060         | <b>A</b> | 246.1561         | 123.5817        | 229.1295        | 115.0684         |                |                  | <b>2</b>  |
| 18 |                  |                 |                  |                  |                  |                  | <b>R</b> | 175.1190         | 88.0631         | 158.0924        | 79.5498          |                |                  | <b>1</b>  |

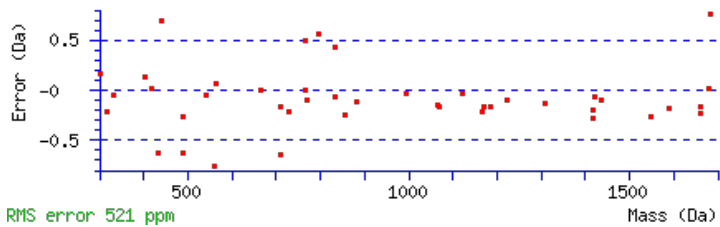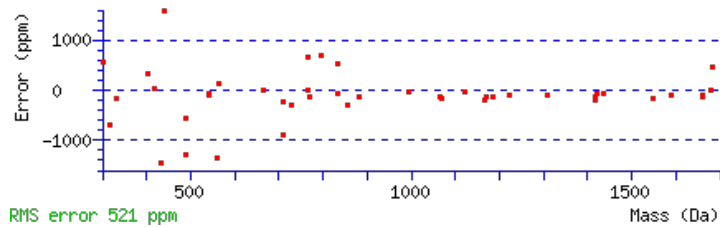

NCBI **BLAST** search of [GLCVLSVGANLTFD GAR](#)

(Parameters: blastp, nr protein database, expect=20000, no filter, PAM30)

Other BLAST [web gateways](#)

**All matches to this query**

| Score | Mr(calc)  | Delta  | Sequence                           |
|-------|-----------|--------|------------------------------------|
| 51.6  | 1850.9197 | 0.0046 | <a href="#">GLCVLSVGANLTFD GAR</a> |
| 1.9   | 1848.9217 | 2.0025 | <a href="#">EIQTRPITDETFDKR</a>    |

Mascot: <http://www.matrixscience.com/>

# MASCOT SCIENCE Mascot Search Results

## Peptide View

MS/MS Fragmentation of **YFYNGTSMACETFQYGGCMGNGNNFVTEK**

Found in **P02760** in **con\_Xuniprot\_HUMAN3**, AMBP\_HUMAN Protein AMBP OS=Homo sapiens GN=AMBP PE=1 SV=1

Match to Query 27524: 3363.355122 from(1122.125650,3+) intensity(9446.5313) rtinseconds(1780) scans(4468) index(11024)

Title: 111019\_Est\_ISCardio\_NMI\_YS\_G\_7Spectrum3783\_scans\_\_4468

Data file C:\mascot\20140703\_Tmgf\_1D\CSV\_UseAnalysis\MasterCSV\All\_Glyco\mgf\ptm\UC18ERLIC\_PTM\_35D.mgf

Click mouse within plot area to zoom in by factor of two about that point

Or, to Da

Label all possible matches Label matches used for scoring

Show Y-axis

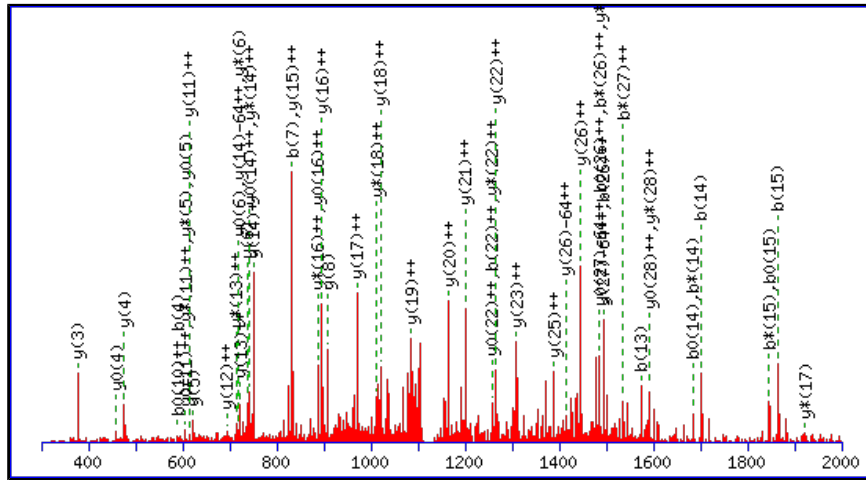

Monoisotopic mass of neutral peptide Mr(calc): 3362.3413

Fixed modifications: Carbamidomethyl (C) (apply to specified residues or termini only)

Variable modifications:

M19 : Oxidation (M), with neutral losses 0.0000 (shown in table), 63.9983

Ions Score: 87 Expect: 4.8e-008

Matches : 58/486 fragment ions using 68 most intense peaks ([help](#))

| #  | b         | b <sup>++</sup> | b <sup>*</sup> | b <sup>*++</sup> | b <sup>0</sup> | b <sup>0++</sup> | Seq. | y         | y <sup>++</sup> | y <sup>*</sup> | y <sup>*++</sup> | y <sup>0</sup> | y <sup>0++</sup> | #  |
|----|-----------|-----------------|----------------|------------------|----------------|------------------|------|-----------|-----------------|----------------|------------------|----------------|------------------|----|
| 1  | 164.0706  | 82.5389         |                |                  |                |                  | Y    |           |                 |                |                  |                |                  | 29 |
| 2  | 311.1390  | 156.0731        |                |                  |                |                  | F    | 3200.2853 | 1600.6463       | 3183.2587      | 1592.1330        | 3182.2747      | 1591.6410        | 28 |
| 3  | 474.2023  | 237.6048        |                |                  |                |                  | Y    | 3053.2169 | 1527.1121       | 3036.1903      | 1518.5988        | 3035.2063      | 1518.1068        | 27 |
| 4  | 588.2453  | 294.6263        | 571.2187       | 286.1130         |                |                  | N    | 2890.1535 | 1445.5804       | 2873.1270      | 1437.0671        | 2872.1430      | 1436.5751        | 26 |
| 5  | 645.2667  | 323.1370        | 628.2402       | 314.6237         |                |                  | G    | 2776.1106 | 1388.5589       | 2759.0841      | 1380.0457        | 2758.1000      | 1379.5537        | 25 |
| 6  | 746.3144  | 373.6608        | 729.2879       | 365.1476         | 728.3039       | 364.6556         | T    | 2719.0891 | 1360.0482       | 2702.0626      | 1351.5349        | 2701.0786      | 1351.0429        | 24 |
| 7  | 833.3464  | 417.1769        | 816.3199       | 408.6636         | 815.3359       | 408.1716         | S    | 2618.0415 | 1309.5244       | 2601.0149      | 1301.0111        | 2600.0309      | 1300.5191        | 23 |
| 8  | 964.3869  | 482.6971        | 947.3604       | 474.1838         | 946.3764       | 473.6918         | M    | 2531.0094 | 1266.0084       | 2513.9829      | 1257.4951        | 2512.9989      | 1257.0031        | 22 |
| 9  | 1035.4240 | 518.2157        | 1018.3975      | 509.7024         | 1017.4135      | 509.2104         | A    | 2399.9689 | 1200.4881       | 2382.9424      | 1191.9748        | 2381.9584      | 1191.4828        | 21 |
| 10 | 1195.4547 | 598.2310        | 1178.4281      | 589.7177         | 1177.4441      | 589.2257         | C    | 2328.9318 | 1164.9696       | 2311.9053      | 1156.4563        | 2310.9213      | 1155.9643        | 20 |
| 11 | 1324.4973 | 662.7523        | 1307.4707      | 654.2390         | 1306.4867      | 653.7470         | E    | 2168.9012 | 1084.9542       | 2151.8746      | 1076.4410        | 2150.8906      | 1075.9489        | 19 |
| 12 | 1425.5450 | 713.2761        | 1408.5184      | 704.7628         | 1407.5344      | 704.2708         | T    | 2039.8586 | 1020.4329       | 2022.8320      | 1011.9197        | 2021.8480      | 1011.4277        | 18 |
| 13 | 1572.6134 | 786.8103        | 1555.5868      | 778.2971         | 1554.6028      | 777.8050         | F    | 1938.8109 | 969.9091        | 1921.7844      | 961.3958         | 1920.8003      | 960.9038         | 17 |
| 14 | 1700.6720 | 850.8396        | 1683.6454      | 842.3263         | 1682.6614      | 841.8343         | Q    | 1791.7425 | 896.3749        | 1774.7159      | 887.8616         | 1773.7319      | 887.3696         | 16 |
| 15 | 1863.7353 | 932.3713        | 1846.7087      | 923.8580         | 1845.7247      | 923.3660         | Y    | 1663.6839 | 832.3456        | 1646.6574      | 823.8323         | 1645.6734      | 823.3403         | 15 |
| 16 | 1920.7568 | 960.8820        | 1903.7302      | 952.3687         | 1902.7462      | 951.8767         | G    | 1500.6206 | 750.8139        | 1483.5940      | 742.3007         | 1482.6100      | 741.8087         | 14 |
| 17 | 1977.7782 | 989.3927        | 1960.7517      | 980.8795         | 1959.7677      | 980.3875         | G    | 1443.5991 | 722.3032        | 1426.5726      | 713.7899         | 1425.5886      | 713.2979         | 13 |
| 18 | 2137.8089 | 1069.4081       | 2120.7823      | 1060.8948        | 2119.7983      | 1060.4028        | C    | 1386.5777 | 693.7925        | 1369.5511      | 685.2792         | 1368.5671      | 684.7872         | 12 |
| 19 | 2284.8443 | 1142.9258       | 2267.8177      | 1134.4125        | 2266.8337      | 1133.9205        | M    | 1226.5470 | 613.7771        | 1209.5205      | 605.2639         | 1208.5364      | 604.7719         | 11 |
| 20 | 2341.8657 | 1171.4365       | 2324.8392      | 1162.9232        | 2323.8552      | 1162.4312        | G    | 1079.5116 | 540.2594        | 1062.4851      | 531.7462         | 1061.5010      | 531.2542         | 10 |
| 21 | 2455.9087 | 1228.4580       | 2438.8821      | 1219.9447        | 2437.8981      | 1219.4527        | N    | 1022.4901 | 511.7487        | 1005.4636      | 503.2354         | 1004.4796      | 502.7434         | 9  |
| 22 | 2512.9301 | 1256.9687       | 2495.9036      | 1248.4554        | 2494.9196      | 1247.9634        | G    | 908.4472  | 454.7272        | 891.4207       | 446.2140         | 890.4367       | 445.7220         | 8  |
| 23 | 2626.9730 | 1313.9902       | 2609.9465      | 1305.4769        | 2608.9625      | 1304.9849        | N    | 851.4258  | 426.2165        | 834.3992       | 417.7032         | 833.4152       | 417.2112         | 7  |

|    |           |           |           |           |           |           |   |          |          |          |          |          |          |   |
|----|-----------|-----------|-----------|-----------|-----------|-----------|---|----------|----------|----------|----------|----------|----------|---|
| 24 | 2741.0160 | 1371.0116 | 2723.9894 | 1362.4983 | 2723.0054 | 1362.0063 | N | 737.3828 | 369.1951 | 720.3563 | 360.6818 | 719.3723 | 360.1898 | 6 |
| 25 | 2888.0844 | 1444.5458 | 2871.0578 | 1436.0326 | 2870.0738 | 1435.5405 | F | 623.3399 | 312.1736 | 606.3134 | 303.6603 | 605.3293 | 303.1683 | 5 |
| 26 | 2987.1528 | 1494.0800 | 2970.1263 | 1485.5668 | 2969.1422 | 1485.0748 | V | 476.2715 | 238.6394 | 459.2449 | 230.1261 | 458.2609 | 229.6341 | 4 |
| 27 | 3088.2005 | 1544.6039 | 3071.1739 | 1536.0906 | 3070.1899 | 1535.5986 | T | 377.2031 | 189.1052 | 360.1765 | 180.5919 | 359.1925 | 180.0999 | 3 |
| 28 | 3217.2431 | 1609.1252 | 3200.2165 | 1600.6119 | 3199.2325 | 1600.1199 | E | 276.1554 | 138.5813 | 259.1288 | 130.0681 | 258.1448 | 129.5761 | 2 |
| 29 |           |           |           |           |           |           | K | 147.1128 | 74.0600  | 130.0863 | 65.5468  |          |          | 1 |

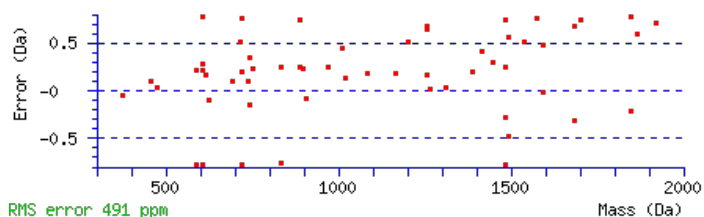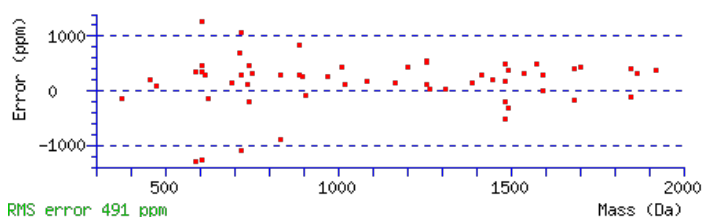

NCBI BLAST search of [YFYNGTSMACETFQYGGCMGNGNNEFVTEK](#)  
 (Parameters: blastp, nr protein database, expect=20000, no filter, PAM30)  
 Other BLAST [web gateways](#)

All matches to this query

| Score | Mr(calc)  | Delta  | Sequence                                       |
|-------|-----------|--------|------------------------------------------------|
| 86.6  | 3362.3413 | 1.0138 | <a href="#">YFYNGTSMACETFQYGGCMGNGNNEFVTEK</a> |
| 73.6  | 3362.3413 | 1.0138 | <a href="#">YFYNGTSMACETFQYGGCMGNGNNEFVTVR</a> |
| 69.1  | 3362.3413 | 1.0138 | <a href="#">YFYNGTSMACETFQYGGCMGNGNNEFVTVR</a> |
| 64.6  | 3362.3413 | 1.0138 | <a href="#">YFYNGTSMACETFQYGGCMGNGNNEFVTVR</a> |
| 64.4  | 3362.3413 | 1.0138 | <a href="#">YFYNGTSMACETFQYGGCMGNGNNEFVTVR</a> |
| 54.5  | 3361.3573 | 1.9978 | <a href="#">YFYNGTSMACETFQYGGCMGNGNNEFVTVR</a> |
| 54.5  | 3361.3573 | 1.9978 | <a href="#">YFYNGTSMACETFQYGGCMGNGNNEFVTVR</a> |
| 54.5  | 3361.3573 | 1.9978 | <a href="#">YFYNGTSMACETFQYGGCMGNGNNEFVTVR</a> |
| 47.2  | 3362.3413 | 1.0138 | <a href="#">YFYNGTSMACETFQYGGCMGNGNNEFVTVR</a> |
| 45.8  | 3362.3413 | 1.0138 | <a href="#">YFYNGTSMACETFQYGGCMGNGNNEFVTVR</a> |

Mascot: <http://www.matrixscience.com/>



# MASCOT SCIENCE Mascot Search Results

## Peptide View

MS/MS Fragmentation of **YFYNGTSMACETFQYGGCMGNGNNFVTEK**

Found in **P02760** in **con\_Xuniprot\_HUMAN3**, AMBP\_HUMAN Protein AMBP OS=Homo sapiens GN=AMBP PE=1 SV=1

Match to Query 27514: 3363.334872 from(1122.118900,3+) intensity(0.0000) rtinseconds(3021) scans(7999) index(4828)

Title: 111019\_Est\_ISCardio\_NMI\_YP\_G\_7Spectrum6867\_scans\_\_7999

Data file C:\mascot\20140703\_Tmgf\_1D\CSV\_UseAnalysis\MasterCSV\All\_Glyco\mgf\ptm\UC18ERLIC\_PTM\_35D.mgf

Click mouse within plot area to zoom in by factor of two about that point

Or, to Da

Label all possible matches Label matches used for scoring

Show Y-axis

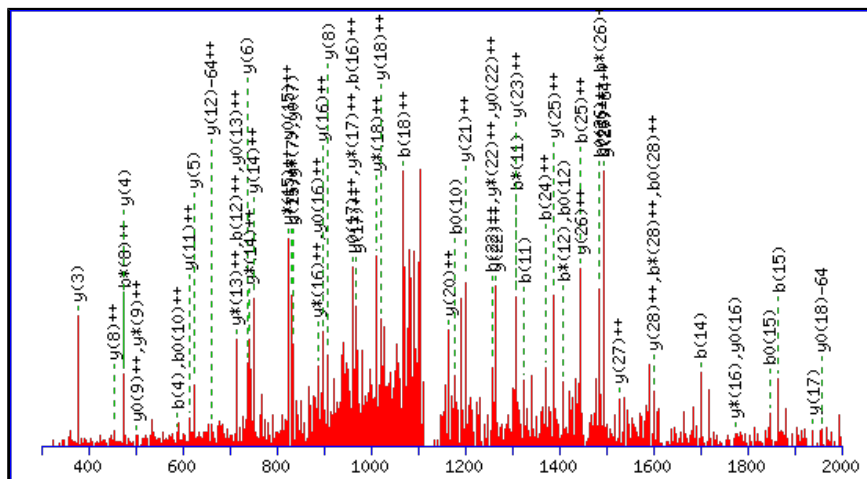

Monoisotopic mass of neutral peptide Mr(calc): 3363.3253

Fixed modifications: Carbamidomethyl (C) (apply to specified residues or termini only)

Variable modifications:

N4 : Deamidated (NQ)

M19 : Oxidation (M), with neutral losses 0.0000(shown in table), 63.9983

Ions Score: 75 Expect: 3.5e-007

Matches : 67/486 fragment ions using 85 most intense peaks ([help](#))

| #  | b         | b <sup>++</sup> | b <sup>*</sup> | b <sup>*++</sup> | b <sup>0</sup> | b <sup>0++</sup> | Seq. | y         | y <sup>++</sup> | y <sup>*</sup> | y <sup>*++</sup> | y <sup>0</sup> | y <sup>0++</sup> | #  |
|----|-----------|-----------------|----------------|------------------|----------------|------------------|------|-----------|-----------------|----------------|------------------|----------------|------------------|----|
| 1  | 164.0706  | 82.5389         |                |                  |                |                  | Y    |           |                 |                |                  |                |                  | 29 |
| 2  | 311.1390  | 156.0731        |                |                  |                |                  | F    | 3201.2693 | 1601.1383       | 3184.2427      | 1592.6250        | 3183.2587      | 1592.1330        | 28 |
| 3  | 474.2023  | 237.6048        |                |                  |                |                  | Y    | 3054.2009 | 1527.6041       | 3037.1743      | 1519.0908        | 3036.1903      | 1518.5988        | 27 |
| 4  | 589.2293  | 295.1183        | 572.2027       | 286.6050         |                |                  | N    | 2891.1375 | 1446.0724       | 2874.1110      | 1437.5591        | 2873.1270      | 1437.0671        | 26 |
| 5  | 646.2508  | 323.6290        | 629.2242       | 315.1157         |                |                  | G    | 2776.1106 | 1388.5589       | 2759.0841      | 1380.0457        | 2758.1000      | 1379.5537        | 25 |
| 6  | 747.2984  | 374.1529        | 730.2719       | 365.6396         | 729.2879       | 365.1476         | T    | 2719.0891 | 1360.0482       | 2702.0626      | 1351.5349        | 2701.0786      | 1351.0429        | 24 |
| 7  | 834.3305  | 417.6689        | 817.3039       | 409.1556         | 816.3199       | 408.6636         | S    | 2618.0415 | 1309.5244       | 2601.0149      | 1301.0111        | 2600.0309      | 1300.5191        | 23 |
| 8  | 965.3709  | 483.1891        | 948.3444       | 474.6758         | 947.3604       | 474.1838         | M    | 2531.0094 | 1266.0084       | 2513.9829      | 1257.4951        | 2512.9989      | 1257.0031        | 22 |
| 9  | 1036.4081 | 518.7077        | 1019.3815      | 510.1944         | 1018.3975      | 509.7024         | A    | 2399.9689 | 1200.4881       | 2382.9424      | 1191.9748        | 2381.9584      | 1191.4828        | 21 |
| 10 | 1196.4387 | 598.7230        | 1179.4122      | 590.2097         | 1178.4281      | 589.7177         | C    | 2328.9318 | 1164.9696       | 2311.9053      | 1156.4563        | 2310.9213      | 1155.9643        | 20 |
| 11 | 1325.4813 | 663.2443        | 1308.4548      | 654.7310         | 1307.4707      | 654.2390         | E    | 2168.9012 | 1084.9542       | 2151.8746      | 1076.4410        | 2150.8906      | 1075.9489        | 19 |
| 12 | 1426.5290 | 713.7681        | 1409.5024      | 705.2549         | 1408.5184      | 704.7628         | T    | 2039.8586 | 1020.4329       | 2022.8320      | 1011.9197        | 2021.8480      | 1011.4277        | 18 |
| 13 | 1573.5974 | 787.3023        | 1556.5708      | 778.7891         | 1555.5868      | 778.2971         | F    | 1938.8109 | 969.9091        | 1921.7844      | 961.3958         | 1920.8003      | 960.9038         | 17 |
| 14 | 1701.6560 | 851.3316        | 1684.6294      | 842.8184         | 1683.6454      | 842.3263         | Q    | 1791.7425 | 896.3749        | 1774.7159      | 887.8616         | 1773.7319      | 887.3696         | 16 |
| 15 | 1864.7193 | 932.8633        | 1847.6928      | 924.3500         | 1846.7087      | 923.8580         | Y    | 1663.6839 | 832.3456        | 1646.6574      | 823.8323         | 1645.6734      | 823.3403         | 15 |
| 16 | 1921.7408 | 961.3740        | 1904.7142      | 952.8607         | 1903.7302      | 952.3687         | G    | 1500.6206 | 750.8139        | 1483.5940      | 742.3007         | 1482.6100      | 741.8087         | 14 |
| 17 | 1978.7622 | 989.8848        | 1961.7357      | 981.3715         | 1960.7517      | 980.8795         | G    | 1443.5991 | 722.3032        | 1426.5726      | 713.7899         | 1425.5886      | 713.2979         | 13 |
| 18 | 2138.7929 | 1069.9001       | 2121.7663      | 1061.3868        | 2120.7823      | 1060.8948        | C    | 1386.5777 | 693.7925        | 1369.5511      | 685.2792         | 1368.5671      | 684.7872         | 12 |
| 19 | 2285.8283 | 1143.4178       | 2268.8017      | 1134.9045        | 2267.8177      | 1134.4125        | M    | 1226.5470 | 613.7771        | 1209.5205      | 605.2639         | 1208.5364      | 604.7719         | 11 |
| 20 | 2342.8497 | 1171.9285       | 2325.8232      | 1163.4152        | 2324.8392      | 1162.9232        | G    | 1079.5116 | 540.2594        | 1062.4851      | 531.7462         | 1061.5010      | 531.2542         | 10 |
| 21 | 2456.8927 | 1228.9500       | 2439.8661      | 1220.4367        | 2438.8821      | 1219.9447        | N    | 1022.4901 | 511.7487        | 1005.4636      | 503.2354         | 1004.4796      | 502.7434         | 9  |
| 22 | 2513.9141 | 1257.4607       | 2496.8876      | 1248.9474        | 2495.9036      | 1248.4554        | G    | 908.4472  | 454.7272        | 891.4207       | 446.2140         | 890.4367       | 445.7220         | 8  |

|    |           |           |           |           |           |           |   |          |          |          |          |          |          |   |
|----|-----------|-----------|-----------|-----------|-----------|-----------|---|----------|----------|----------|----------|----------|----------|---|
| 23 | 2627.9571 | 1314.4822 | 2610.9305 | 1305.9689 | 2609.9465 | 1305.4769 | N | 851.4258 | 426.2165 | 834.3992 | 417.7032 | 833.4152 | 417.2112 | 7 |
| 24 | 2742.0000 | 1371.5036 | 2724.9734 | 1362.9904 | 2723.9894 | 1362.4983 | N | 737.3828 | 369.1951 | 720.3563 | 360.6818 | 719.3723 | 360.1898 | 6 |
| 25 | 2889.0684 | 1445.0378 | 2872.0419 | 1436.5246 | 2871.0578 | 1436.0326 | F | 623.3399 | 312.1736 | 606.3134 | 303.6603 | 605.3293 | 303.1683 | 5 |
| 26 | 2988.1368 | 1494.5720 | 2971.1103 | 1486.0588 | 2970.1263 | 1485.5668 | V | 476.2715 | 238.6394 | 459.2449 | 230.1261 | 458.2609 | 229.6341 | 4 |
| 27 | 3089.1845 | 1545.0959 | 3072.1579 | 1536.5826 | 3071.1739 | 1536.0906 | T | 377.2031 | 189.1052 | 360.1765 | 180.5919 | 359.1925 | 180.0999 | 3 |
| 28 | 3218.2271 | 1609.6172 | 3201.2005 | 1601.1039 | 3200.2165 | 1600.6119 | E | 276.1554 | 138.5813 | 259.1288 | 130.0681 | 258.1448 | 129.5761 | 2 |
| 29 |           |           |           |           |           |           | K | 147.1128 | 74.0600  | 130.0863 | 65.5468  |          |          | 1 |

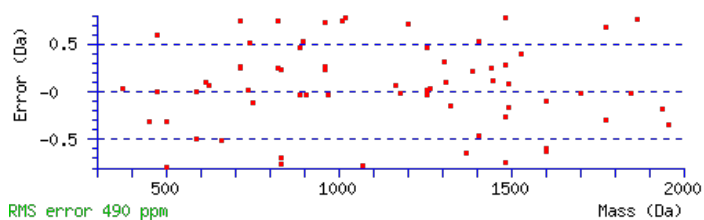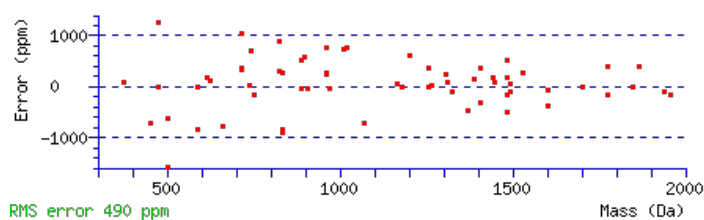

NCBI BLAST search of [YFYNGTSMACETFQYGGCMGNGNNEFVTEK](#)

(Parameters: blastp, nr protein database, expect=20000, no filter, PAM30)

Other BLAST [web gateways](#)

All matches to this query

| Score | Mr(calc)  | Delta  | Sequence                                       | Site Analysis                         |
|-------|-----------|--------|------------------------------------------------|---------------------------------------|
| 75.4  | 3363.3253 | 0.0095 | <a href="#">YFYNGTSMACETFQYGGCMGNGNNEFVTEK</a> | Deamidated N4, Oxidation M19; 38.49%  |
| 74.3  | 3363.3253 | 0.0095 | <a href="#">YFYNGTSMACETFQYGGCMGNGNNEFVTEK</a> | Deamidated N21, Oxidation M19; 30.15% |
| 70.4  | 3363.3253 | 0.0095 | <a href="#">YFYNGTSMACETFQYGGCMGNGNNEFVTEK</a> | Deamidated Q14, Oxidation M19; 12.12% |
| 68.6  | 3363.3253 | 0.0095 | <a href="#">YFYNGTSMACETFQYGGCMGNGNNEFVTVR</a> |                                       |
| 68.5  | 3363.3253 | 0.0095 | <a href="#">YFYNGTSMACETFQYGGCMGNGNNEFVTVR</a> |                                       |
| 67.1  | 3363.3253 | 0.0095 | <a href="#">YFYNGTSMACETFQYGGCMGNGNNEFVTEK</a> | Deamidated N4, Oxidation M8; 5.69%    |
| 65.5  | 3363.3253 | 0.0095 | <a href="#">YFYNGTSMACETFQYGGCMGNGNNEFVTVR</a> |                                       |
| 64.8  | 3363.3253 | 0.0095 | <a href="#">YFYNGTSMACETFQYGGCMGNGNNEFVTVR</a> |                                       |
| 64.0  | 3363.3253 | 0.0095 | <a href="#">YFYNGTSMACETFQYGGCMGNGNNEFVTVR</a> |                                       |
| 63.9  | 3363.3253 | 0.0095 | <a href="#">YFYNGTSMACETFQYGGCMGNGNNEFVTEK</a> | Deamidated N23, Oxidation M19; 2.72%  |

Mascot: <http://www.matrixscience.com/>

# MATRIX SCIENCE Mascot Search Results

## Peptide View

MS/MS Fragmentation of **YFYNGTSMACETFQYGGCMGNGNNFVTEK**

Found in **P02760** in **con\_Xuniprot\_HUMAN3**, AMBP\_HUMAN Protein AMBP OS=Homo sapiens GN=AMBP PE=1 SV=1

Match to Query 27537: 3364.360812 from(1122.460880,3+) intensity(3124.8772) rtinseconds(3089) scans(8171) index(4861)

Title: 111019\_Est\_ISCardio\_NMI\_YP\_G\_7Spectrum7018\_scans\_\_8171

Data file C:\mascot\20140703\_Tmgf\_1D\CSV\_UseAnalysis\MasterCSV\All\_Glyco\mgf\ptm\UC18ERLIC\_PTM\_35D.mgf

Click mouse within plot area to zoom in by factor of two about that point

Or, to Da

Label all possible matches Label matches used for scoring

Show Y-axis

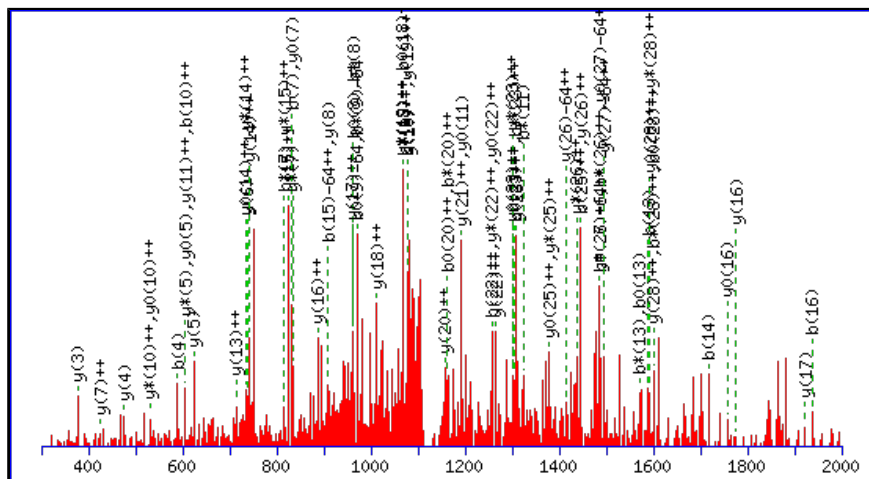

Monoisotopic mass of neutral peptide Mr(calc): 3362.3413

Fixed modifications: Carbamidomethyl (C) (apply to specified residues or termini only)

Variable modifications:

M8 : Oxidation (M), with neutral losses 0.0000 (shown in table), 63.9983

Ions Score: 48 Expect: 0.00038

Matches : 77/486 fragment ions using 136 most intense peaks (help)

| #  | b                | b <sup>++</sup>  | b <sup>*</sup>   | b <sup>*++</sup> | b <sup>0</sup>   | b <sup>0++</sup> | Seq. | y                | y <sup>++</sup> | y <sup>*</sup>  | y <sup>*++</sup> | y <sup>0</sup>   | y <sup>0++</sup> | #  |
|----|------------------|------------------|------------------|------------------|------------------|------------------|------|------------------|-----------------|-----------------|------------------|------------------|------------------|----|
| 1  | 164.0706         | 82.5389          |                  |                  |                  |                  | Y    |                  |                 |                 |                  |                  |                  | 29 |
| 2  | 311.1390         | 156.0731         |                  |                  |                  |                  | F    | 3200.2853        | 1600.6463       | 3183.2587       | 1592.1330        | 3182.2747        | 1591.6410        | 28 |
| 3  | 474.2023         | 237.6048         |                  |                  |                  |                  | Y    | 3053.2169        | 1527.1121       | 3036.1903       | 1518.5988        | 3035.2063        | 1518.1068        | 27 |
| 4  | <b>588.2453</b>  | 294.6263         | 571.2187         | 286.1130         |                  |                  | N    | 2890.1535        | 1445.5804       | 2873.1270       | 1437.0671        | 2872.1430        | 1436.5751        | 26 |
| 5  | 645.2667         | 323.1370         | 628.2402         | 314.6237         |                  |                  | G    | 2776.1106        | 1388.5589       | 2759.0841       | 1380.0457        | 2758.1000        | 1379.5537        | 25 |
| 6  | 746.3144         | 373.6608         | 729.2879         | 365.1476         | 728.3039         | 364.6556         | T    | 2719.0891        | 1360.0482       | 2702.0626       | 1351.5349        | 2701.0786        | 1351.0429        | 24 |
| 7  | <b>833.3464</b>  | 417.1769         | <b>816.3199</b>  | 408.6636         | 815.3359         | 408.1716         | S    | 2618.0415        | 1309.5244       | 2601.0149       | 1301.0111        | 2600.0309        | 1300.5191        | 23 |
| 8  | 980.3818         | 490.6946         | <b>963.3553</b>  | 482.1813         | <b>962.3713</b>  | 481.6893         | M    | 2531.0094        | 1266.0084       | 2513.9829       | 1257.4951        | 2512.9989        | 1257.0031        | 22 |
| 9  | 1051.4190        | 526.2131         | 1034.3924        | 517.6998         | 1033.4084        | 517.2078         | A    | 2383.9740        | 1192.4907       | 2366.9475       | 1183.9774        | 2365.9635        | 1183.4854        | 21 |
| 10 | 1211.4496        | <b>606.2284</b>  | 1194.4231        | 597.7152         | 1193.4390        | 597.2232         | C    | 2312.9369        | 1156.9721       | 2295.9104       | 1148.4588        | 2294.9264        | 1147.9668        | 20 |
| 11 | 1340.4922        | 670.7497         | <b>1323.4657</b> | 662.2365         | 1322.4816        | 661.7445         | E    | 2152.9063        | 1076.9568       | 2135.8797       | 1068.4435        | 2134.8957        | 1067.9515        | 19 |
| 12 | 1441.5399        | 721.2736         | 1424.5133        | 712.7603         | 1423.5293        | 712.2683         | T    | 2023.8637        | 1012.4355       | 2006.8371       | 1003.9222        | 2005.8531        | 1003.4302        | 18 |
| 13 | <b>1588.6083</b> | 794.8078         | <b>1571.5817</b> | 786.2945         | <b>1570.5977</b> | 785.8025         | F    | <b>1922.8160</b> | <b>961.9116</b> | 1905.7894       | 953.3984         | 1904.8054        | 952.9064         | 17 |
| 14 | <b>1716.6669</b> | 858.8371         | 1699.6403        | 850.3238         | 1698.6563        | 849.8318         | Q    | <b>1775.7476</b> | <b>888.3774</b> | 1758.7210       | 879.8642         | <b>1757.7370</b> | 879.3721         | 16 |
| 15 | 1879.7302        | 940.3687         | 1862.7037        | 931.8555         | 1861.7196        | 931.3635         | Y    | 1647.6890        | 824.3481        | 1630.6625       | 815.8349         | 1629.6784        | 815.3429         | 15 |
| 16 | <b>1936.7517</b> | 968.8795         | 1919.7251        | 960.3662         | 1918.7411        | 959.8742         | G    | 1484.6257        | <b>742.8165</b> | 1467.5991       | <b>734.3032</b>  | 1466.6151        | <b>733.8112</b>  | 14 |
| 17 | 1993.7731        | 997.3902         | 1976.7466        | 988.8769         | 1975.7626        | 988.3849         | G    | 1427.6042        | <b>714.3057</b> | 1410.5777       | 705.7925         | 1409.5936        | 705.3005         | 13 |
| 18 | 2153.8038        | <b>1077.4055</b> | 2136.7772        | <b>1068.8923</b> | 2135.7932        | <b>1068.4002</b> | C    | 1370.5827        | 685.7950        | 1353.5562       | 677.2817         | 1352.5722        | 676.7897         | 12 |
| 19 | 2284.8443        | 1142.9258        | 2267.8177        | 1134.4125        | 2266.8337        | 1133.9205        | M    | 1210.5521        | <b>605.7797</b> | 1193.5255       | 597.2664         | <b>1192.5415</b> | 596.7744         | 11 |
| 20 | 2341.8657        | 1171.4365        | 2324.8392        | <b>1162.9232</b> | 2323.8552        | <b>1162.4312</b> | G    | <b>1079.5116</b> | 540.2594        | 1062.4851       | <b>531.7462</b>  | 1061.5010        | <b>531.2542</b>  | 10 |
| 21 | 2455.9087        | 1228.4580        | 2438.8821        | 1219.9447        | 2437.8981        | 1219.4527        | N    | 1022.4901        | 511.7487        | 1005.4636       | 503.2354         | 1004.4796        | 502.7434         | 9  |
| 22 | 2512.9301        | <b>1256.9687</b> | 2495.9036        | 1248.4554        | 2494.9196        | 1247.9634        | G    | <b>908.4472</b>  | 454.7272        | 891.4207        | 446.2140         | 890.4367         | 445.7220         | 8  |
| 23 | 2626.9730        | 1313.9902        | 2609.9465        | <b>1305.4769</b> | 2608.9625        | <b>1304.9849</b> | N    | 851.4258         | <b>426.2165</b> | <b>834.3992</b> | 417.7032         | <b>833.4152</b>  | 417.2112         | 7  |

|    |           |           |           |           |           |           |   |          |          |          |          |          |          |   |
|----|-----------|-----------|-----------|-----------|-----------|-----------|---|----------|----------|----------|----------|----------|----------|---|
| 24 | 2741.0160 | 1371.0116 | 2723.9894 | 1362.4983 | 2723.0054 | 1362.0063 | N | 737.3828 | 369.1951 | 720.3563 | 360.6818 | 719.3723 | 360.1898 | 6 |
| 25 | 2888.0844 | 1444.5458 | 2871.0578 | 1436.0326 | 2870.0738 | 1435.5405 | F | 623.3399 | 312.1736 | 606.3134 | 303.6603 | 605.3293 | 303.1683 | 5 |
| 26 | 2987.1528 | 1494.0800 | 2970.1263 | 1485.5668 | 2969.1422 | 1485.0748 | V | 476.2715 | 238.6394 | 459.2449 | 230.1261 | 458.2609 | 229.6341 | 4 |
| 27 | 3088.2005 | 1544.6039 | 3071.1739 | 1536.0906 | 3070.1899 | 1535.5986 | T | 377.2031 | 189.1052 | 360.1765 | 180.5919 | 359.1925 | 180.0999 | 3 |
| 28 | 3217.2431 | 1609.1252 | 3200.2165 | 1600.6119 | 3199.2325 | 1600.1199 | E | 276.1554 | 138.5813 | 259.1288 | 130.0681 | 258.1448 | 129.5761 | 2 |
| 29 |           |           |           |           |           |           | K | 147.1128 | 74.0600  | 130.0863 | 65.5468  |          |          | 1 |

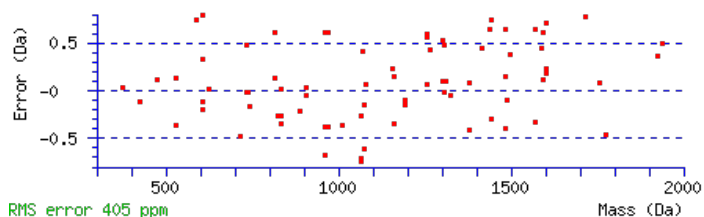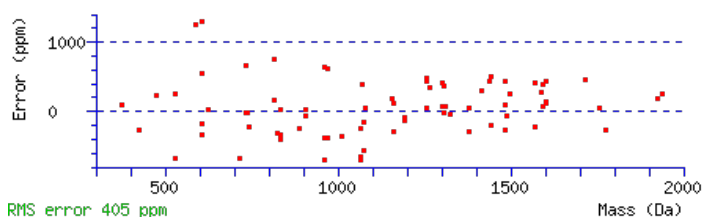

NCBI BLAST search of [YFYNGTSMACETFQYGGCMGNGNNEFVTEK](#)  
 (Parameters: blastp, nr protein database, expect=20000, no filter, PAM30)  
 Other BLAST [web gateways](#)

All matches to this query

| Score | Mr(calc)  | Delta  | Sequence                                       | Site Analysis       |
|-------|-----------|--------|------------------------------------------------|---------------------|
| 48.0  | 3362.3413 | 2.0195 | <a href="#">YFYNGTSMACETFQYGGCMGNGNNEFVTEK</a> | Oxidation M8 95.44% |
| 42.8  | 3362.3413 | 2.0195 | <a href="#">YFYNGTSMACETFQYGGCMGNGNNEFVTVR</a> |                     |
| 41.3  | 3362.3413 | 2.0195 | <a href="#">YFYNGTSMACETFQYGGCMGNGNNEFVTVR</a> |                     |
| 39.7  | 3362.3413 | 2.0195 | <a href="#">YFYNGTSMACETFQYGGCMGNGNNEFVTVR</a> |                     |
| 34.8  | 3362.3413 | 2.0195 | <a href="#">YFYNGTSMACETFQYGGCMGNGNNEFVTEK</a> | Oxidation M19 4.56% |
| 34.5  | 3362.3413 | 2.0195 | <a href="#">YFYNGTSMACETFQYGGCMGNGNNEFVTVR</a> |                     |
| 34.5  | 3362.3413 | 2.0195 | <a href="#">YFYNGTSMACETFQYGGCMGNGNNEFVTVR</a> |                     |
| 22.6  | 3362.3413 | 2.0195 | <a href="#">YFYNGTSMACETFQYGGCMGNGNNEFVTVR</a> |                     |
| 22.3  | 3362.3413 | 2.0195 | <a href="#">YFYNGTSMACETFQYGGCMGNGNNEFVTVR</a> |                     |
| 20.9  | 3362.3413 | 2.0195 | <a href="#">YFYNGTSMACETFQYGGCMGNGNNEFVTVR</a> |                     |

Mascot: <http://www.matrixscience.com/>

# MATRIX SCIENCE Mascot Search Results

## Peptide View

MS/MS Fragmentation of **YFYNGTSMACETFQYGGCMGNGNNFVTVR**

Found in **S4R471** in **con\_Xuniprot\_HUMAN3**, S4R471\_HUMAN Protein AMBP (Fragment) OS=Homo sapiens GN=AMBP PE=4 SV=1

Match to Query 27660: 3379.342482 from(1127.454770,3+) intensity(2847.7961) rtinseconds(1732) scans(3645) index(21902)

Title: 111019\_Est\_MI\_YP\_G\_15Spectrum3142\_scans\_\_3645

Data file C:\mascot\20140703\_Tmgf\_1D\CSV\_UseAnalysis\MasterCSV\All\_Glyco\mgf\ptm\UC18ERLIC\_PTM\_35D.mgf

Click mouse within plot area to zoom in by factor of two about that point

Or, to Da

Label all possible matches Label matches used for scoring

Show Y-axis

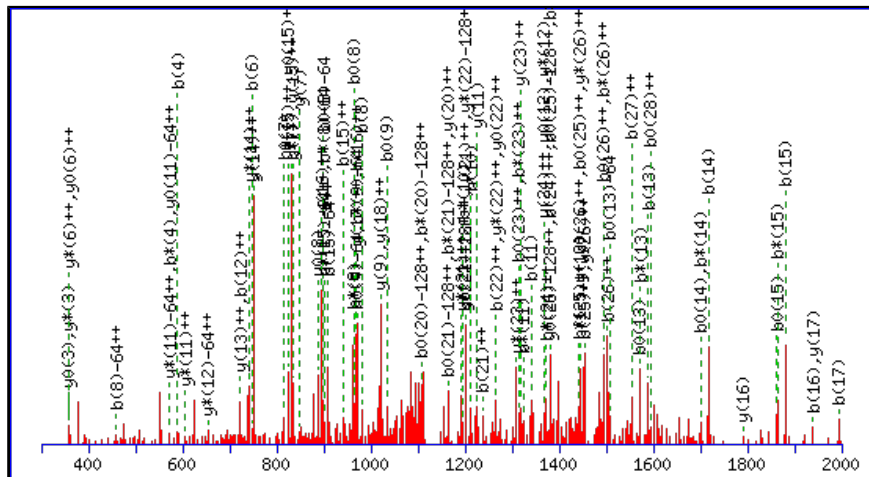

Monoisotopic mass of neutral peptide Mr(calc): 3378.3363

Fixed modifications: Carbamidomethyl (C) (apply to specified residues or termini only)

Variable modifications:

N4 : Deamidated (NQ)

M8 : Oxidation (M), with neutral losses 0.0000(shown in table), 63.9983

M19 : Oxidation (M), with neutral losses 0.0000(shown in table), 63.9983

N21 : Deamidated (NQ)

Ions Score: 42 Expect: 0.00098

Matches : 98/550 fragment ions using 162 most intense peaks (help)

| #  | b                | b <sup>++</sup>  | b <sup>*</sup>   | b <sup>*++</sup> | b <sup>0</sup>   | b <sup>0++</sup> | Seq. | y                | y <sup>++</sup>  | y <sup>*</sup>   | y <sup>*++</sup> | y <sup>0</sup>   | y <sup>0++</sup> | #  |
|----|------------------|------------------|------------------|------------------|------------------|------------------|------|------------------|------------------|------------------|------------------|------------------|------------------|----|
| 1  | 164.0706         | 82.5389          |                  |                  |                  |                  | Y    |                  |                  |                  |                  |                  |                  | 29 |
| 2  | 311.1390         | 156.0731         |                  |                  |                  |                  | F    | 3216.2802        | 1608.6437        | 3199.2536        | 1600.1305        | 3198.2696        | 1599.6384        | 28 |
| 3  | 474.2023         | 237.6048         |                  |                  |                  |                  | Y    | 3069.2118        | 1535.1095        | 3052.1852        | 1526.5963        | 3051.2012        | 1526.1042        | 27 |
| 4  | <b>589.2293</b>  | 295.1183         | <b>572.2027</b>  | 286.6050         |                  |                  | N    | 2906.1484        | <b>1453.5779</b> | 2889.1219        | <b>1445.0646</b> | 2888.1379        | <b>1444.5726</b> | 26 |
| 5  | 646.2508         | 323.6290         | 629.2242         | 315.1157         |                  |                  | G    | 2791.1215        | 1396.0644        | 2774.0950        | 1387.5511        | 2773.1109        | 1387.0591        | 25 |
| 6  | <b>747.2984</b>  | 374.1529         | 730.2719         | 365.6396         | 729.2879         | 365.1476         | T    | 2734.1000        | <b>1367.5537</b> | 2717.0735        | 1359.0404        | 2716.0895        | 1358.5484        | 24 |
| 7  | <b>834.3305</b>  | 417.6689         | 817.3039         | 409.1556         | <b>816.3199</b>  | 408.6636         | S    | 2633.0524        | <b>1317.0298</b> | 2616.0258        | <b>1308.5165</b> | 2615.0418        | 1308.0245        | 23 |
| 8  | <b>981.3659</b>  | 491.1866         | <b>964.3393</b>  | 482.6733         | <b>963.3553</b>  | 482.1813         | M    | 2546.0203        | 1273.5138        | 2528.9938        | <b>1265.0005</b> | 2528.0098        | <b>1264.5085</b> | 22 |
| 9  | 1052.4030        | 526.7051         | 1035.3764        | 518.1919         | <b>1034.3924</b> | 517.6998         | A    | 2398.9849        | <b>1199.9961</b> | 2381.9584        | <b>1191.4828</b> | 2380.9744        | 1190.9908        | 21 |
| 10 | <b>1212.4336</b> | 606.7205         | <b>1195.4071</b> | 598.2072         | 1194.4231        | 597.7152         | C    | 2327.9478        | <b>1164.4775</b> | 2310.9213        | 1155.9643        | 2309.9373        | 1155.4723        | 20 |
| 11 | <b>1341.4762</b> | 671.2417         | <b>1324.4497</b> | 662.7285         | 1323.4657        | 662.2365         | E    | 2167.9172        | 1084.4622        | 2150.8906        | 1075.9489        | 2149.9066        | 1075.4569        | 19 |
| 12 | <b>1442.5239</b> | <b>721.7656</b>  | 1425.4973        | 713.2523         | 1424.5133        | 712.7603         | T    | 2038.8746        | <b>1019.9409</b> | 2021.8480        | 1011.4277        | 2020.8640        | 1010.9356        | 18 |
| 13 | <b>1589.5923</b> | 795.2998         | <b>1572.5658</b> | 786.7865         | <b>1571.5817</b> | 786.2945         | F    | <b>1937.8269</b> | <b>969.4171</b>  | 1920.8003        | 960.9038         | 1919.8163        | 960.4118         | 17 |
| 14 | <b>1717.6509</b> | 859.3291         | <b>1700.6243</b> | 850.8158         | <b>1699.6403</b> | 850.3238         | Q    | <b>1790.7585</b> | <b>895.8829</b>  | 1773.7319        | 887.3696         | 1772.7479        | 886.8776         | 16 |
| 15 | <b>1880.7142</b> | <b>940.8607</b>  | <b>1863.6877</b> | 932.3475         | <b>1862.7037</b> | 931.8555         | Y    | 1662.6999        | <b>831.8536</b>  | 1645.6734        | <b>823.3403</b>  | 1644.6893        | <b>822.8483</b>  | 15 |
| 16 | <b>1937.7357</b> | <b>969.3715</b>  | 1920.7091        | 960.8582         | 1919.7251        | 960.3662         | G    | 1499.6366        | <b>750.3219</b>  | 1482.6100        | <b>741.8087</b>  | 1481.6260        | 741.3166         | 14 |
| 17 | <b>1994.7571</b> | 997.8822         | 1977.7306        | 989.3689         | 1976.7466        | 988.8769         | G    | <b>1442.6151</b> | <b>721.8112</b>  | 1425.5886        | 713.2979         | 1424.6045        | 712.8059         | 13 |
| 18 | 2154.7878        | 1077.8975        | 2137.7612        | 1069.3843        | 2136.7772        | 1068.8923        | C    | 1385.5936        | 693.3005         | <b>1368.5671</b> | 684.7872         | <b>1367.5831</b> | 684.2952         | 12 |
| 19 | 2301.8232        | 1151.4152        | 2284.7966        | 1142.9020        | 2283.8126        | 1142.4100        | M    | <b>1225.5630</b> | 613.2851         | 1208.5364        | <b>604.7719</b>  | 1207.5524        | 604.2799         | 11 |
| 20 | 2358.8447        | 1179.9260        | 2341.8181        | 1171.4127        | 2340.8341        | 1170.9207        | G    | 1078.5276        | 539.7674         | 1061.5010        | 531.2542         | 1060.5170        | 530.7622         | 10 |
| 21 | 2473.8716        | <b>1237.4394</b> | 2456.8451        | 1228.9262        | 2455.8610        | 1228.4342        | N    | <b>1021.5061</b> | 511.2567         | 1004.4796        | 502.7434         | 1003.4956        | 502.2514         | 9  |

|    |           |                  |           |                  |           |                  |          |                 |          |                 |                 |                 |                 |          |
|----|-----------|------------------|-----------|------------------|-----------|------------------|----------|-----------------|----------|-----------------|-----------------|-----------------|-----------------|----------|
| 22 | 2530.8931 | <b>1265.9502</b> | 2513.8665 | 1257.4369        | 2512.8825 | 1256.9449        | <b>G</b> | 906.4792        | 453.7432 | 889.4526        | 445.2300        | <b>888.4686</b> | 444.7380        | <b>8</b> |
| 23 | 2644.9360 | 1322.9716        | 2627.9094 | <b>1314.4584</b> | 2626.9254 | <b>1313.9664</b> | <b>N</b> | <b>849.4577</b> | 425.2325 | <b>832.4312</b> | 416.7192        | 831.4472        | 416.2272        | <b>7</b> |
| 24 | 2758.9789 | <b>1379.9931</b> | 2741.9524 | <b>1371.4798</b> | 2740.9684 | 1370.9878        | <b>N</b> | 735.4148        | 368.2110 | 718.3883        | <b>359.6978</b> | 717.4042        | <b>359.2058</b> | <b>6</b> |
| 25 | 2906.0473 | <b>1453.5273</b> | 2889.0208 | <b>1445.0140</b> | 2888.0368 | <b>1444.5220</b> | <b>F</b> | 621.3719        | 311.1896 | 604.3453        | 302.6763        | 603.3613        | 302.1843        | <b>5</b> |
| 26 | 3005.1157 | <b>1503.0615</b> | 2988.0892 | <b>1494.5482</b> | 2987.1052 | <b>1494.0562</b> | <b>V</b> | 474.3035        | 237.6554 | 457.2769        | 229.1421        | 456.2929        | 228.6501        | <b>4</b> |
| 27 | 3106.1634 | <b>1553.5854</b> | 3089.1369 | 1545.0721        | 3088.1529 | 1544.5801        | <b>T</b> | 375.2350        | 188.1212 | <b>358.2085</b> | 179.6079        | <b>357.2245</b> | 179.1159        | <b>3</b> |
| 28 | 3205.2318 | 1603.1196        | 3188.2053 | 1594.6063        | 3187.2213 | <b>1594.1143</b> | <b>V</b> | 274.1874        | 137.5973 | 257.1608        | 129.0840        |                 |                 | <b>2</b> |
| 29 |           |                  |           |                  |           |                  | <b>R</b> | 175.1190        | 88.0631  | 158.0924        | 79.5498         |                 |                 | <b>1</b> |

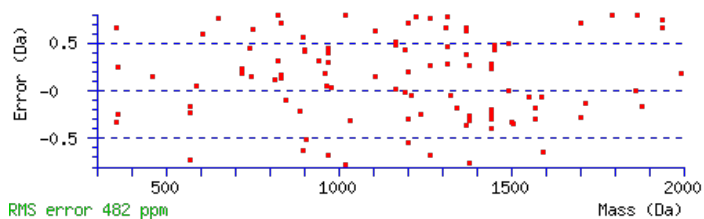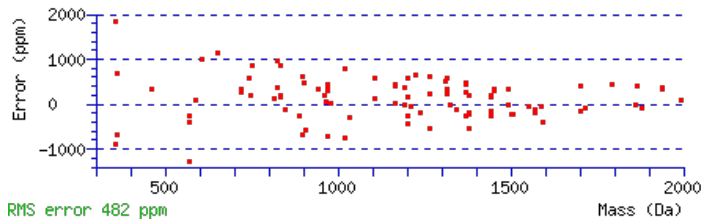

NCBI BLAST search of [YFYNGTSMACETFQYGGCMGNGNNEFVTVR](#)  
 (Parameters: blastp, nr protein database, expect=20000, no filter, PAM30)  
 Other BLAST [web gateways](#)

All matches to this query

| Score | Mr(calc)  | Delta  | Sequence                                       | Site Analysis              |
|-------|-----------|--------|------------------------------------------------|----------------------------|
| 41.8  | 3378.3363 | 1.0062 | <a href="#">YFYNGTSMACETFQYGGCMGNGNNEFVTVR</a> | Deamidated N4, N21 20.11%  |
| 41.4  | 3378.3363 | 1.0062 | <a href="#">YFYNGTSMACETFQYGGCMGNGNNEFVTVR</a> | Deamidated Q14, N21 18.26% |
| 40.7  | 3378.3363 | 1.0062 | <a href="#">YFYNGTSMACETFQYGGCMGNGNNEFVTVR</a> | Deamidated N4, N24 15.87%  |
| 40.7  | 3378.3363 | 1.0062 | <a href="#">YFYNGTSMACETFQYGGCMGNGNNEFVTVR</a> | Deamidated N4, N23 15.87%  |
| 39.9  | 3378.3363 | 1.0062 | <a href="#">YFYNGTSMACETFQYGGCMGNGNNEFVTVR</a> | Deamidated Q14, N24 12.96% |
| 39.9  | 3378.3363 | 1.0062 | <a href="#">YFYNGTSMACETFQYGGCMGNGNNEFVTVR</a> | Deamidated Q14, N23 12.96% |
| 39.7  | 3378.3363 | 1.0062 | <a href="#">YFYNGTSMACETFQYGGCMGNGNNEFVTEK</a> |                            |
| 32.5  | 3378.3363 | 1.0062 | <a href="#">YFYNGTSMACETFQYGGCMGNGNNEFVTVR</a> | Deamidated N4, Q14 2.40%   |
| 26.6  | 3378.3363 | 1.0062 | <a href="#">YFYNGTSMACETFQYGGCMGNGNNEFVTVR</a> | Deamidated N23, N24 0.62%  |
| 26.1  | 3378.3363 | 1.0062 | <a href="#">YFYNGTSMACETFQYGGCMGNGNNEFVTVR</a> | Deamidated N21, N24 0.54%  |

Mascot: <http://www.matrixscience.com/>



# MASCOT SCIENCE Mascot Search Results

## Peptide View

MS/MS Fragmentation of **YFYNGTSMACETFQYGGCMGNGNNFVTEK**

Found in **P02760** in **con\_Xuniprot\_HUMAN3**, AMBP\_HUMAN Protein AMBP OS=Homo sapiens GN=AMBP PE=1 SV=1

Match to Query 27608: 3379.331022 from(1127.450950,3+) intensity(10924.8106) rtinseconds(1693) scans(4528) index(17594)

Title: 111019\_Est\_MI\_YP\_G\_07Spectrum3887\_scans\_\_4528

Data file C:\mascot\20140703\_Tmgf\_1D\CSV\_UseAnalysis\MasterCSV\All\_Glyco\mgf\ptm\UC18ERLIC\_PTM\_35D.mgf

Click mouse within plot area to zoom in by factor of two about that point

Or, to Da

Label all possible matches Label matches used for scoring

Show Y-axis

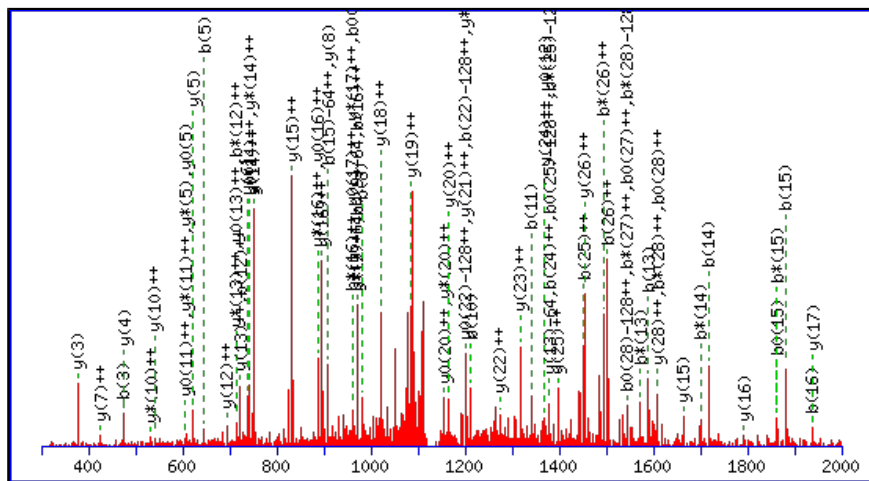

Monoisotopic mass of neutral peptide Mr(calc): 3379.3203

Fixed modifications: Carbamidomethyl (C) (apply to specified residues or termini only)

Variable modifications:

N4 : Deamidated (NQ)

M8 : Oxidation (M), with neutral losses 0.0000(shown in table), 63.9983

M19 : Oxidation (M), with neutral losses 0.0000(shown in table), 63.9983

Ions Score: 131 Expect: 9.7e-013

Matches : 80/552 fragment ions using 68 most intense peaks ([help](#))

| #  | b         | b <sup>++</sup> | b <sup>*</sup> | b <sup>*++</sup> | b <sup>0</sup> | b <sup>0++</sup> | Seq. | y         | y <sup>++</sup> | y <sup>*</sup> | y <sup>*++</sup> | y <sup>0</sup> | y <sup>0++</sup> | #  |
|----|-----------|-----------------|----------------|------------------|----------------|------------------|------|-----------|-----------------|----------------|------------------|----------------|------------------|----|
| 1  | 164.0706  | 82.5389         |                |                  |                |                  | Y    |           |                 |                |                  |                |                  | 29 |
| 2  | 311.1390  | 156.0731        |                |                  |                |                  | F    | 3217.2642 | 1609.1357       | 3200.2377      | 1600.6225        | 3199.2536      | 1600.1305        | 28 |
| 3  | 474.2023  | 237.6048        |                |                  |                |                  | Y    | 3070.1958 | 1535.6015       | 3053.1692      | 1527.0883        | 3052.1852      | 1526.5962        | 27 |
| 4  | 589.2293  | 295.1183        | 572.2027       | 286.6050         |                |                  | N    | 2907.1325 | 1454.0699       | 2890.1059      | 1445.5566        | 2889.1219      | 1445.0646        | 26 |
| 5  | 646.2508  | 323.6290        | 629.2242       | 315.1157         |                |                  | G    | 2792.1055 | 1396.5564       | 2775.0790      | 1388.0431        | 2774.0950      | 1387.5511        | 25 |
| 6  | 747.2984  | 374.1529        | 730.2719       | 365.6396         | 729.2879       | 365.1476         | T    | 2735.0841 | 1368.0457       | 2718.0575      | 1359.5324        | 2717.0735      | 1359.0404        | 24 |
| 7  | 834.3305  | 417.6689        | 817.3039       | 409.1556         | 816.3199       | 408.6636         | S    | 2634.0364 | 1317.5218       | 2617.0098      | 1309.0086        | 2616.0258      | 1308.5165        | 23 |
| 8  | 981.3659  | 491.1866        | 964.3393       | 482.6733         | 963.3553       | 482.1813         | M    | 2547.0043 | 1274.0058       | 2529.9778      | 1265.4925        | 2528.9938      | 1265.0005        | 22 |
| 9  | 1052.4030 | 526.7051        | 1035.3764      | 518.1919         | 1034.3924      | 517.6998         | A    | 2399.9689 | 1200.4881       | 2382.9424      | 1191.9748        | 2381.9584      | 1191.4828        | 21 |
| 10 | 1212.4336 | 606.7205        | 1195.4071      | 598.2072         | 1194.4231      | 597.7152         | C    | 2328.9318 | 1164.9696       | 2311.9053      | 1156.4563        | 2310.9213      | 1155.9643        | 20 |
| 11 | 1341.4762 | 671.2417        | 1324.4497      | 662.7285         | 1323.4657      | 662.2365         | E    | 2168.9012 | 1084.9542       | 2151.8746      | 1076.4410        | 2150.8906      | 1075.9489        | 19 |
| 12 | 1442.5239 | 721.7656        | 1425.4973      | 713.2523         | 1424.5133      | 712.7603         | T    | 2039.8586 | 1020.4329       | 2022.8320      | 1011.9197        | 2021.8480      | 1011.4277        | 18 |
| 13 | 1589.5923 | 795.2998        | 1572.5658      | 786.7865         | 1571.5817      | 786.2945         | F    | 1938.8109 | 969.9091        | 1921.7844      | 961.3958         | 1920.8003      | 960.9038         | 17 |
| 14 | 1717.6509 | 859.3291        | 1700.6243      | 850.8158         | 1699.6403      | 850.3238         | Q    | 1791.7425 | 896.3749        | 1774.7159      | 887.8616         | 1773.7319      | 887.3696         | 16 |
| 15 | 1880.7142 | 940.8607        | 1863.6877      | 932.3475         | 1862.7037      | 931.8555         | Y    | 1663.6839 | 832.3456        | 1646.6574      | 823.8323         | 1645.6734      | 823.3403         | 15 |
| 16 | 1937.7357 | 969.3715        | 1920.7091      | 960.8582         | 1919.7251      | 960.3662         | G    | 1500.6206 | 750.8139        | 1483.5940      | 742.3007         | 1482.6100      | 741.8087         | 14 |
| 17 | 1994.7571 | 997.8822        | 1977.7306      | 989.3689         | 1976.7466      | 988.8769         | G    | 1443.5991 | 722.3032        | 1426.5726      | 713.7899         | 1425.5886      | 713.2979         | 13 |
| 18 | 2154.7878 | 1077.8975       | 2137.7612      | 1069.3843        | 2136.7772      | 1068.8923        | C    | 1386.5777 | 693.7925        | 1369.5511      | 685.2792         | 1368.5671      | 684.7872         | 12 |
| 19 | 2301.8232 | 1151.4152       | 2284.7966      | 1142.9020        | 2283.8126      | 1142.4100        | M    | 1226.5470 | 613.7771        | 1209.5205      | 605.2639         | 1208.5364      | 604.7719         | 11 |
| 20 | 2358.8447 | 1179.9260       | 2341.8181      | 1171.4127        | 2340.8341      | 1170.9207        | G    | 1079.5116 | 540.2594        | 1062.4851      | 531.7462         | 1061.5010      | 531.2542         | 10 |
| 21 | 2472.8876 | 1236.9474       | 2455.8610      | 1228.4342        | 2454.8770      | 1227.9421        | N    | 1022.4901 | 511.7487        | 1005.4636      | 503.2354         | 1004.4796      | 502.7434         | 9  |
| 22 | 2529.9090 | 1265.4582       | 2512.8825      | 1256.9449        | 2511.8985      | 1256.4529        | G    | 908.4472  | 454.7272        | 891.4207       | 446.2140         | 890.4367       | 445.7220         | 8  |



|    |           |           |           |           |           |           |   |          |          |          |          |          |          |   |
|----|-----------|-----------|-----------|-----------|-----------|-----------|---|----------|----------|----------|----------|----------|----------|---|
| 23 | 2643.9520 | 1322.4796 | 2626.9254 | 1313.9664 | 2625.9414 | 1313.4743 | N | 851.4258 | 426.2165 | 834.3992 | 417.7032 | 833.4152 | 417.2112 | 7 |
| 24 | 2757.9949 | 1379.5011 | 2740.9684 | 1370.9878 | 2739.9843 | 1370.4958 | N | 737.3828 | 369.1951 | 720.3563 | 360.6818 | 719.3723 | 360.1898 | 6 |
| 25 | 2905.0633 | 1453.0353 | 2888.0368 | 1444.5220 | 2887.0528 | 1444.0300 | F | 623.3399 | 312.1736 | 606.3134 | 303.6603 | 605.3293 | 303.1683 | 5 |
| 26 | 3004.1317 | 1502.5695 | 2987.1052 | 1494.0562 | 2986.1212 | 1493.5642 | V | 476.2715 | 238.6394 | 459.2449 | 230.1261 | 458.2609 | 229.6341 | 4 |
| 27 | 3105.1794 | 1553.0933 | 3088.1529 | 1544.5801 | 3087.1688 | 1544.0881 | T | 377.2031 | 189.1052 | 360.1765 | 180.5919 | 359.1925 | 180.0999 | 3 |
| 28 | 3234.2220 | 1617.6146 | 3217.1955 | 1609.1014 | 3216.2114 | 1608.6094 | E | 276.1554 | 138.5813 | 259.1288 | 130.0681 | 258.1448 | 129.5761 | 2 |
| 29 |           |           |           |           |           |           | K | 147.1128 | 74.0600  | 130.0863 | 65.5468  |          |          | 1 |

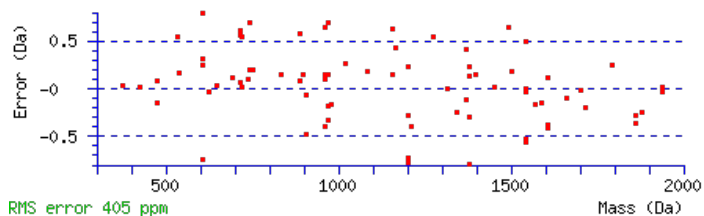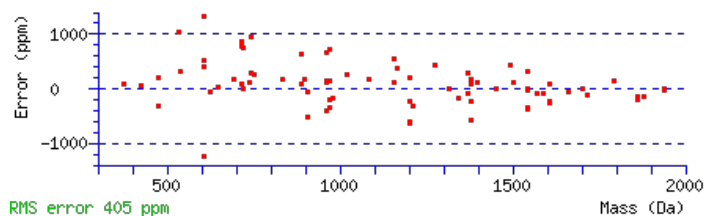

NCBI BLAST search of [YFYNGTSMACETFQYGGCMGNGNNEFVTEK](#)  
 (Parameters: blastp, nr protein database, expect=20000, no filter, PAM30)  
 Other BLAST [web gateways](#)

All matches to this query

| Score | Mr(calc)  | Delta  | Sequence                                       | Site Analysis         |
|-------|-----------|--------|------------------------------------------------|-----------------------|
| 130.9 | 3379.3203 | 0.0108 | <a href="#">YFYNGTSMACETFQYGGCMGNGNNEFVTEK</a> | Deamidated N4 46.94%  |
| 128.8 | 3379.3203 | 0.0108 | <a href="#">YFYNGTSMACETFQYGGCMGNGNNEFVTEK</a> | Deamidated Q14 28.68% |
| 124.5 | 3379.3203 | 0.0108 | <a href="#">YFYNGTSMACETFQYGGCMGNGNNEFVTEK</a> | Deamidated N24 10.68% |
| 122.6 | 3379.3203 | 0.0108 | <a href="#">YFYNGTSMACETFQYGGCMGNGNNEFVTEK</a> | Deamidated N23 6.85%  |
| 122.6 | 3379.3203 | 0.0108 | <a href="#">YFYNGTSMACETFQYGGCMGNGNNEFVTEK</a> | Deamidated N21 6.85%  |
| 122.1 | 3379.3203 | 0.0108 | <a href="#">YFYNGTSMACETFQYGGCMGNGNNEFVTVR</a> |                       |
| 122.1 | 3379.3203 | 0.0108 | <a href="#">YFYNGTSMACETFQYGGCMGNGNNEFVTVR</a> |                       |
| 118.1 | 3379.3203 | 0.0108 | <a href="#">YFYNGTSMACETFQYGGCMGNGNNEFVTVR</a> |                       |
| 118.1 | 3379.3203 | 0.0108 | <a href="#">YFYNGTSMACETFQYGGCMGNGNNEFVTVR</a> |                       |
| 118.1 | 3379.3203 | 0.0108 | <a href="#">YFYNGTSMACETFQYGGCMGNGNNEFVTVR</a> |                       |

Mascot: <http://www.matrixscience.com/>

# MASCOT SCIENCE Mascot Search Results

## Peptide View

MS/MS Fragmentation of **YFYNGTSMACETFQYGGCMGNGNNFVTEK**

Found in **P02760** in **con\_Xuniprot\_HUMAN3**, AMBP\_HUMAN Protein AMBP OS=Homo sapiens GN=AMBP PE=1 SV=1

Match to Query 27516: 3363.336522 from(1122.119450,3+) intensity(23263.3320) rtinseconds(1787) scans(4490) index(11031)

Title: 111019\_Est\_ISCardio\_NMI\_YS\_G\_7Spectrum3801\_scans\_\_4490

Data file C:\mascot\20140703\_Tmgf\_1D\CSV\_UseAnalysis\MasterCSV\All\_Glyco\mgf\ptm\UC18ERLIC\_PTM\_35D.mgf

Click mouse within plot area to zoom in by factor of two about that point

Or, to Da

Label all possible matches Label matches used for scoring

Show Y-axis

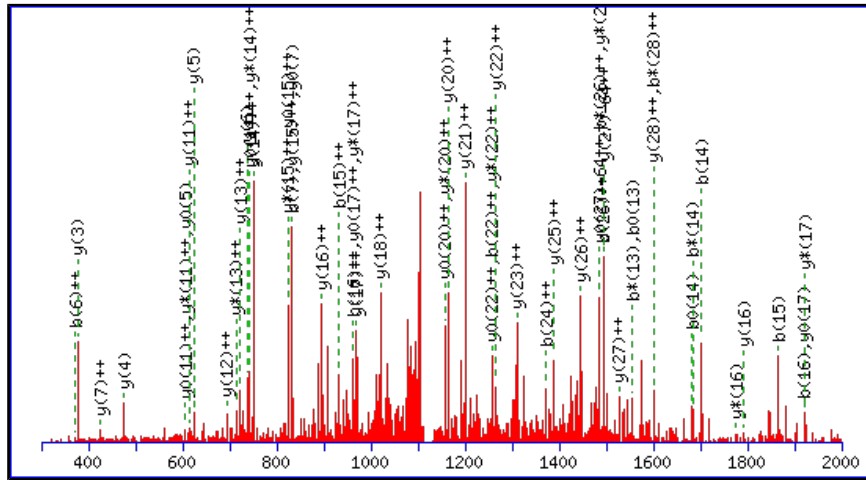

Monoisotopic mass of neutral peptide Mr(calc): 3363.3253

Fixed modifications: Carbamidomethyl (C) (apply to specified residues or termini only)

Variable modifications:

Q14 : Deamidated (NQ)

M19 : Oxidation (M), with neutral losses 0.0000(shown in table), 63.9983

Ions Score: 122 Expect: 9e-012

Matches : 59/486 fragment ions using 68 most intense peaks ([help](#))

| #  | b         | b <sup>++</sup> | b <sup>*</sup> | b <sup>*++</sup> | b <sup>0</sup> | b <sup>0++</sup> | Seq. | y         | y <sup>++</sup> | y <sup>*</sup> | y <sup>*++</sup> | y <sup>0</sup> | y <sup>0++</sup> | #  |
|----|-----------|-----------------|----------------|------------------|----------------|------------------|------|-----------|-----------------|----------------|------------------|----------------|------------------|----|
| 1  | 164.0706  | 82.5389         |                |                  |                |                  | Y    |           |                 |                |                  |                |                  | 29 |
| 2  | 311.1390  | 156.0731        |                |                  |                |                  | F    | 3201.2693 | 1601.1383       | 3184.2427      | 1592.6250        | 3183.2587      | 1592.1330        | 28 |
| 3  | 474.2023  | 237.6048        |                |                  |                |                  | Y    | 3054.2009 | 1527.6041       | 3037.1743      | 1519.0908        | 3036.1903      | 1518.5988        | 27 |
| 4  | 588.2453  | 294.6263        | 571.2187       | 286.1130         |                |                  | N    | 2891.1375 | 1446.0724       | 2874.1110      | 1437.5591        | 2873.1270      | 1437.0671        | 26 |
| 5  | 645.2667  | 323.1370        | 628.2402       | 314.6237         |                |                  | G    | 2777.0946 | 1389.0509       | 2760.0681      | 1380.5377        | 2759.0841      | 1380.0457        | 25 |
| 6  | 746.3144  | 373.6608        | 729.2879       | 365.1476         | 728.3039       | 364.6556         | T    | 2720.0732 | 1360.5402       | 2703.0466      | 1352.0269        | 2702.0626      | 1351.5349        | 24 |
| 7  | 833.3464  | 417.1769        | 816.3199       | 408.6636         | 815.3359       | 408.1716         | S    | 2619.0255 | 1310.0164       | 2601.9989      | 1301.5031        | 2601.0149      | 1301.0111        | 23 |
| 8  | 964.3869  | 482.6971        | 947.3604       | 474.1838         | 946.3764       | 473.6918         | M    | 2531.9934 | 1266.5004       | 2514.9669      | 1257.9871        | 2513.9829      | 1257.4951        | 22 |
| 9  | 1035.4240 | 518.2157        | 1018.3975      | 509.7024         | 1017.4135      | 509.2104         | A    | 2400.9530 | 1200.9801       | 2383.9264      | 1192.4668        | 2382.9424      | 1191.9748        | 21 |
| 10 | 1195.4547 | 598.2310        | 1178.4281      | 589.7177         | 1177.4441      | 589.2257         | C    | 2329.9158 | 1165.4616       | 2312.8893      | 1156.9483        | 2311.9053      | 1156.4563        | 20 |
| 11 | 1324.4973 | 662.7523        | 1307.4707      | 654.2390         | 1306.4867      | 653.7470         | E    | 2169.8852 | 1085.4462       | 2152.8586      | 1076.9330        | 2151.8746      | 1076.4410        | 19 |
| 12 | 1425.5450 | 713.2761        | 1408.5184      | 704.7628         | 1407.5344      | 704.2708         | T    | 2040.8426 | 1020.9249       | 2023.8161      | 1012.4117        | 2022.8320      | 1011.9197        | 18 |
| 13 | 1572.6134 | 786.8103        | 1555.5868      | 778.2971         | 1554.6028      | 777.8050         | F    | 1939.7949 | 970.4011        | 1922.7684      | 961.8878         | 1921.7844      | 961.3958         | 17 |
| 14 | 1701.6560 | 851.3316        | 1684.6294      | 842.8184         | 1683.6454      | 842.3263         | Q    | 1792.7265 | 896.8669        | 1775.7000      | 888.3536         | 1774.7159      | 887.8616         | 16 |
| 15 | 1864.7193 | 932.8633        | 1847.6928      | 924.3500         | 1846.7087      | 923.8580         | Y    | 1663.6839 | 832.3456        | 1646.6574      | 823.8323         | 1645.6734      | 823.3403         | 15 |
| 16 | 1921.7408 | 961.3740        | 1904.7142      | 952.8607         | 1903.7302      | 952.3687         | G    | 1500.6206 | 750.8139        | 1483.5940      | 742.3007         | 1482.6100      | 741.8087         | 14 |
| 17 | 1978.7622 | 989.8848        | 1961.7357      | 981.3715         | 1960.7517      | 980.8795         | G    | 1443.5991 | 722.3032        | 1426.5726      | 713.7899         | 1425.5886      | 713.2979         | 13 |
| 18 | 2138.7929 | 1069.9001       | 2121.7663      | 1061.3868        | 2120.7823      | 1060.8948        | C    | 1386.5777 | 693.7925        | 1369.5511      | 685.2792         | 1368.5671      | 684.7872         | 12 |
| 19 | 2285.8283 | 1143.4178       | 2268.8017      | 1134.9045        | 2267.8177      | 1134.4125        | M    | 1226.5470 | 613.7771        | 1209.5205      | 605.2639         | 1208.5364      | 604.7719         | 11 |
| 20 | 2342.8497 | 1171.9285       | 2325.8232      | 1163.4152        | 2324.8392      | 1162.9232        | G    | 1079.5116 | 540.2594        | 1062.4851      | 531.7462         | 1061.5010      | 531.2542         | 10 |
| 21 | 2456.8927 | 1228.9500       | 2439.8661      | 1220.4367        | 2438.8821      | 1219.9447        | N    | 1022.4901 | 511.7487        | 1005.4636      | 503.2354         | 1004.4796      | 502.7434         | 9  |
| 22 | 2513.9141 | 1257.4607       | 2496.8876      | 1248.9474        | 2495.9036      | 1248.4554        | G    | 908.4472  | 454.7272        | 891.4207       | 446.2140         | 890.4367       | 445.7220         | 8  |

|    |           |           |           |           |           |           |   |          |          |          |          |          |          |   |
|----|-----------|-----------|-----------|-----------|-----------|-----------|---|----------|----------|----------|----------|----------|----------|---|
| 23 | 2627.9571 | 1314.4822 | 2610.9305 | 1305.9689 | 2609.9465 | 1305.4769 | N | 851.4258 | 426.2165 | 834.3992 | 417.7032 | 833.4152 | 417.2112 | 7 |
| 24 | 2742.0000 | 1371.5036 | 2724.9734 | 1362.9904 | 2723.9894 | 1362.4984 | N | 737.3828 | 369.1951 | 720.3563 | 360.6818 | 719.3723 | 360.1898 | 6 |
| 25 | 2889.0684 | 1445.0378 | 2872.0419 | 1436.5246 | 2871.0578 | 1436.0326 | F | 623.3399 | 312.1736 | 606.3134 | 303.6603 | 605.3293 | 303.1683 | 5 |
| 26 | 2988.1368 | 1494.5720 | 2971.1103 | 1486.0588 | 2970.1263 | 1485.5668 | V | 476.2715 | 238.6394 | 459.2449 | 230.1261 | 458.2609 | 229.6341 | 4 |
| 27 | 3089.1845 | 1545.0959 | 3072.1579 | 1536.5826 | 3071.1739 | 1536.0906 | T | 377.2031 | 189.1052 | 360.1765 | 180.5919 | 359.1925 | 180.0999 | 3 |
| 28 | 3218.2271 | 1609.6172 | 3201.2005 | 1601.1039 | 3200.2165 | 1600.6119 | E | 276.1554 | 138.5813 | 259.1288 | 130.0681 | 258.1448 | 129.5761 | 2 |
| 29 |           |           |           |           |           |           | K | 147.1128 | 74.0600  | 130.0863 | 65.5468  |          |          | 1 |

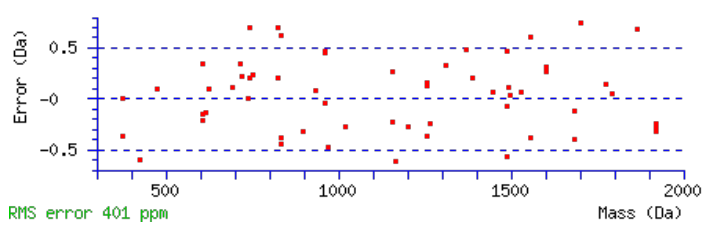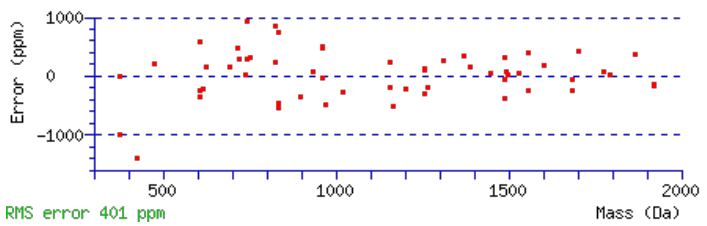

NCBI BLAST search of [YFYNGTSMACETFQYGGCMGNGNNEFVTEK](#)  
 (Parameters: blastp, nr protein database, expect=20000, no filter, PAM30)  
 Other BLAST [web gateways](#)

All matches to this query

| Score | Mr(calc)  | Delta  | Sequence                                       | Site Analysis                         |
|-------|-----------|--------|------------------------------------------------|---------------------------------------|
| 121.9 | 3363.3253 | 0.0112 | <a href="#">YFYNGTSMACETFQYGGCMGNGNNEFVTEK</a> | Deamidated Q14, Oxidation M19; 43.76% |
| 119.8 | 3363.3253 | 0.0112 | <a href="#">YFYNGTSMACETFQYGGCMGNGNNEFVTEK</a> | Deamidated N4, Oxidation M19; 27.35%  |
| 116.1 | 3363.3253 | 0.0112 | <a href="#">YFYNGTSMACETFQYGGCMGNGNNEFVTEK</a> | Deamidated N24, Oxidation M19; 11.51% |
| 115.6 | 3363.3253 | 0.0112 | <a href="#">YFYNGTSMACETFQYGGCMGNGNNEFVTEK</a> | Deamidated N21, Oxidation M19; 10.30% |
| 113.6 | 3363.3253 | 0.0112 | <a href="#">YFYNGTSMACETFQYGGCMGNGNNEFVTEK</a> | Deamidated N23, Oxidation M19; 6.59%  |
| 104.0 | 3362.3413 | 0.9952 | <a href="#">YFYNGTSMACETFQYGGCMGNGNNEFVTEK</a> |                                       |
| 102.1 | 3363.3253 | 0.0112 | <a href="#">YFYNGTSMACETFQYGGCMGNGNNEFVTVR</a> |                                       |
| 96.7  | 3363.3253 | 0.0112 | <a href="#">YFYNGTSMACETFQYGGCMGNGNNEFVTVR</a> |                                       |
| 96.4  | 3362.3413 | 0.9952 | <a href="#">YFYNGTSMACETFQYGGCMGNGNNEFVTVR</a> |                                       |
| 96.3  | 3363.3253 | 0.0112 | <a href="#">YFYNGTSMACETFQYGGCMGNGNNEFVTVR</a> |                                       |

Mascot: <http://www.matrixscience.com/>

# MASCOT SCIENCE Mascot Search Results

## Peptide View

MS/MS Fragmentation of **YFYNGTSMACETFQYGGCMGNGNNFVTEK**

Found in **P02760** in **con\_Xuniprot\_HUMAN3**, AMBP\_HUMAN Protein AMBP OS=Homo sapiens GN=AMBP PE=1 SV=1

Match to Query 27594: 3379.328652 from(1127.450160,3+) intensity(24610.3223) rtinseconds(1902) scans(5005) index(4515)

Title: 111019\_Est\_ISCardio\_NMI\_YP\_G\_7Spectrum4242\_scans\_\_5005

Data file C:\\mascot\\20140703\_Tmgf\_1D\\CSV\_UseAnalysis\\MasterCSV\\All\_Glyco\\mgf\\ptm\\UC18ERLIC\_PT\_M\_35D.mgf

Click mouse within plot area to zoom in by factor of two about that point

Or,  to  Da

Label all possible matches  Label matches used for scoring

Show Y-axis

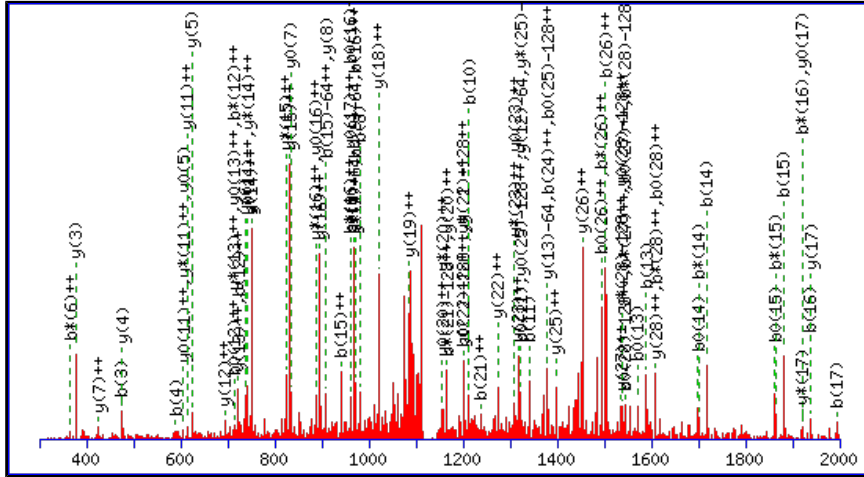

Monoisotopic mass of neutral peptide Mr(calc): 3379.3203

Fixed modifications: Carbamidomethyl (C) (apply to specified residues or termini only)

Variable modifications:

N4 : Deamidated (NQ)

M8 : Oxidation (M), with neutral losses 0.0000(shown in table), 63.9983

M19 : Oxidation (M), with neutral losses 0.0000(shown in table), 63.9983

Ions Score: 105 Expect: 3.1e-010

Matches : 94/552 fragment ions using 102 most intense peaks ([help](#))

| #  | b         | b <sup>++</sup> | b <sup>*</sup> | b <sup>*++</sup> | b <sup>0</sup> | b <sup>0++</sup> | Seq. | y         | y <sup>++</sup> | y <sup>*</sup> | y <sup>*++</sup> | y <sup>0</sup> | y <sup>0++</sup> | #  |
|----|-----------|-----------------|----------------|------------------|----------------|------------------|------|-----------|-----------------|----------------|------------------|----------------|------------------|----|
| 1  | 164.0706  | 82.5389         |                |                  |                |                  | Y    |           |                 |                |                  |                |                  | 29 |
| 2  | 311.1390  | 156.0731        |                |                  |                |                  | F    | 3217.2642 | 1609.1357       | 3200.2377      | 1600.6225        | 3199.2536      | 1600.1305        | 28 |
| 3  | 474.2023  | 237.6048        |                |                  |                |                  | Y    | 3070.1958 | 1535.6015       | 3053.1692      | 1527.0883        | 3052.1852      | 1526.5962        | 27 |
| 4  | 589.2293  | 295.1183        | 572.2027       | 286.6050         |                |                  | N    | 2907.1325 | 1454.0699       | 2890.1059      | 1445.5566        | 2889.1219      | 1445.0646        | 26 |
| 5  | 646.2508  | 323.6290        | 629.2242       | 315.1157         |                |                  | G    | 2792.1055 | 1396.5564       | 2775.0790      | 1388.0431        | 2774.0950      | 1387.5511        | 25 |
| 6  | 747.2984  | 374.1529        | 730.2719       | 365.6396         | 729.2879       | 365.1476         | T    | 2735.0841 | 1368.0457       | 2718.0575      | 1359.5324        | 2717.0735      | 1359.0404        | 24 |
| 7  | 834.3305  | 417.6689        | 817.3039       | 409.1556         | 816.3199       | 408.6636         | S    | 2634.0364 | 1317.5218       | 2617.0098      | 1309.0086        | 2616.0258      | 1308.5165        | 23 |
| 8  | 981.3659  | 491.1866        | 964.3393       | 482.6733         | 963.3553       | 482.1813         | M    | 2547.0043 | 1274.0058       | 2529.9778      | 1265.4925        | 2528.9938      | 1265.0005        | 22 |
| 9  | 1052.4030 | 526.7051        | 1035.3764      | 518.1919         | 1034.3924      | 517.6998         | A    | 2399.9689 | 1200.4881       | 2382.9424      | 1191.9748        | 2381.9584      | 1191.4828        | 21 |
| 10 | 1212.4336 | 606.7205        | 1195.4071      | 598.2072         | 1194.4231      | 597.7152         | C    | 2328.9318 | 1164.9696       | 2311.9053      | 1156.4563        | 2310.9213      | 1155.9643        | 20 |
| 11 | 1341.4762 | 671.2417        | 1324.4497      | 662.7285         | 1323.4657      | 662.2365         | E    | 2168.9012 | 1084.9542       | 2151.8746      | 1076.4410        | 2150.8906      | 1075.9489        | 19 |
| 12 | 1442.5239 | 721.7656        | 1425.4973      | 713.2523         | 1424.5133      | 712.7603         | T    | 2039.8586 | 1020.4329       | 2022.8320      | 1011.9197        | 2021.8480      | 1011.4277        | 18 |
| 13 | 1589.5923 | 795.2998        | 1572.5658      | 786.7865         | 1571.5817      | 786.2945         | F    | 1938.8109 | 969.9091        | 1921.7844      | 961.3958         | 1920.8003      | 960.9038         | 17 |
| 14 | 1717.6509 | 859.3291        | 1700.6243      | 850.8158         | 1699.6403      | 850.3238         | Q    | 1791.7425 | 896.3749        | 1774.7159      | 887.8616         | 1773.7319      | 887.3696         | 16 |
| 15 | 1880.7142 | 940.8607        | 1863.6877      | 932.3475         | 1862.7037      | 931.8555         | Y    | 1663.6839 | 832.3456        | 1646.6574      | 823.8323         | 1645.6734      | 823.3403         | 15 |
| 16 | 1937.7357 | 969.3715        | 1920.7091      | 960.8582         | 1919.7251      | 960.3662         | G    | 1500.6206 | 750.8139        | 1483.5940      | 742.3007         | 1482.6100      | 741.8087         | 14 |
| 17 | 1994.7571 | 997.8822        | 1977.7306      | 989.3689         | 1976.7466      | 988.8769         | G    | 1443.5991 | 722.3032        | 1426.5726      | 713.7899         | 1425.5886      | 713.2979         | 13 |
| 18 | 2154.7878 | 1077.8975       | 2137.7612      | 1069.3843        | 2136.7772      | 1068.8923        | C    | 1386.5777 | 693.7925        | 1369.5511      | 685.2792         | 1368.5671      | 684.7872         | 12 |
| 19 | 2301.8232 | 1151.4152       | 2284.7966      | 1142.9020        | 2283.8126      | 1142.4100        | M    | 1226.5470 | 613.7771        | 1209.5205      | 605.2639         | 1208.5364      | 604.7719         | 11 |
| 20 | 2358.8447 | 1179.9260       | 2341.8181      | 1171.4127        | 2340.8341      | 1170.9207        | G    | 1079.5116 | 540.2594        | 1062.4851      | 531.7462         | 1061.5010      | 531.2542         | 10 |
| 21 | 2472.8876 | 1236.9474       | 2455.8610      | 1228.4342        | 2454.8770      | 1227.9421        | N    | 1022.4901 | 511.7487        | 1005.4636      | 503.2354         | 1004.4796      | 502.7434         | 9  |
| 22 | 2529.9090 | 1265.4582       | 2512.8825      | 1256.9449        | 2511.8985      | 1256.4529        | G    | 908.4472  | 454.7272        | 891.4207       | 446.2140         | 890.4367       | 445.7220         | 8  |

|    |           |           |           |           |           |           |   |          |          |          |          |          |          |   |
|----|-----------|-----------|-----------|-----------|-----------|-----------|---|----------|----------|----------|----------|----------|----------|---|
| 23 | 2643.9520 | 1322.4796 | 2626.9254 | 1313.9664 | 2625.9414 | 1313.4743 | N | 851.4258 | 426.2165 | 834.3992 | 417.7032 | 833.4152 | 417.2112 | 7 |
| 24 | 2757.9949 | 1379.5011 | 2740.9684 | 1370.9878 | 2739.9843 | 1370.4958 | N | 737.3828 | 369.1951 | 720.3563 | 360.6818 | 719.3723 | 360.1898 | 6 |
| 25 | 2905.0633 | 1453.0353 | 2888.0368 | 1444.5220 | 2887.0528 | 1444.0300 | F | 623.3399 | 312.1736 | 606.3134 | 303.6603 | 605.3293 | 303.1683 | 5 |
| 26 | 3004.1317 | 1502.5695 | 2987.1052 | 1494.0562 | 2986.1212 | 1493.5642 | V | 476.2715 | 238.6394 | 459.2449 | 230.1261 | 458.2609 | 229.6341 | 4 |
| 27 | 3105.1794 | 1553.0933 | 3088.1529 | 1544.5801 | 3087.1688 | 1544.0881 | T | 377.2031 | 189.1052 | 360.1765 | 180.5919 | 359.1925 | 180.0999 | 3 |
| 28 | 3234.2220 | 1617.6146 | 3217.1955 | 1609.1014 | 3216.2114 | 1608.6094 | E | 276.1554 | 138.5813 | 259.1288 | 130.0681 | 258.1448 | 129.5761 | 2 |
| 29 |           |           |           |           |           |           | K | 147.1128 | 74.0600  | 130.0863 | 65.5468  |          |          | 1 |

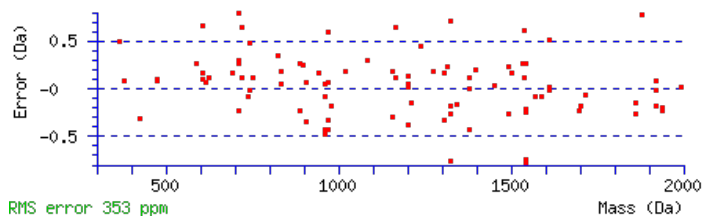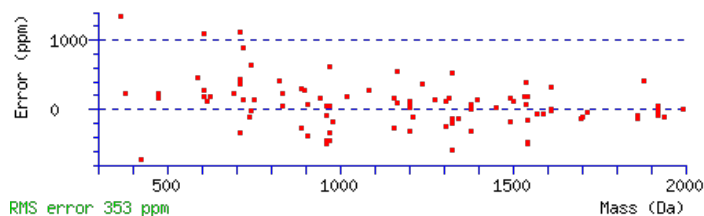

NCBI BLAST search of [YFYNGTSMACETFQYGGCMGNGNNEFVTEK](#)  
 (Parameters: blastp, nr protein database, expect=20000, no filter, PAM30)  
 Other BLAST [web gateways](#)

All matches to this query

| Score | Mr(calc)  | Delta  | Sequence                                       | Site Analysis         |
|-------|-----------|--------|------------------------------------------------|-----------------------|
| 105.3 | 3379.3203 | 0.0084 | <a href="#">YFYNGTSMACETFQYGGCMGNGNNEFVTEK</a> | Deamidated N4 47.54%  |
| 103.9 | 3379.3203 | 0.0084 | <a href="#">YFYNGTSMACETFQYGGCMGNGNNEFVTEK</a> | Deamidated Q14 34.92% |
| 101.9 | 3378.3363 | 0.9924 | <a href="#">YFYNGTSMACETFQYGGCMGNGNNEFVTVR</a> |                       |
| 101.9 | 3378.3363 | 0.9924 | <a href="#">YFYNGTSMACETFQYGGCMGNGNNEFVTVR</a> |                       |
| 101.9 | 3378.3363 | 0.9924 | <a href="#">YFYNGTSMACETFQYGGCMGNGNNEFVTVR</a> |                       |
| 97.4  | 3378.3363 | 0.9924 | <a href="#">YFYNGTSMACETFQYGGCMGNGNNEFVTVR</a> |                       |
| 97.4  | 3378.3363 | 0.9924 | <a href="#">YFYNGTSMACETFQYGGCMGNGNNEFVTVR</a> |                       |
| 97.4  | 3378.3363 | 0.9924 | <a href="#">YFYNGTSMACETFQYGGCMGNGNNEFVTVR</a> |                       |
| 97.2  | 3379.3203 | 0.0084 | <a href="#">YFYNGTSMACETFQYGGCMGNGNNEFVTVR</a> |                       |
| 97.2  | 3379.3203 | 0.0084 | <a href="#">YFYNGTSMACETFQYGGCMGNGNNEFVTVR</a> |                       |

Mascot: <http://www.matrixscience.com/>

# MATRIX SCIENCE Mascot Search Results

## Peptide View

MS/MS Fragmentation of **YFYNGTSMACETFQYGGCMGNGNNFVTVR**

Found in **S4R471** in **con\_Xuniprot\_HUMAN3**, S4R471\_HUMAN Protein AMBP (Fragment) OS=Homo sapiens GN=AMBP PE=4 SV=1

Match to Query 27689: 3380.317482 from(1127.779770,3+) intensity(9494.3203) rtinseconds(1725) scans(4620) index(17606)

Title: 111019\_Est\_MI\_YP\_G\_07Spectrum3966\_scans\_\_4620

Data file C:\mascot\20140703\_Tmgf\_1D\CSV\_UseAnalysis\MasterCSV\All\_Glyco\mgf\ptm\UC18ERLIC\_PTM\_35D.mgf

Click mouse within plot area to zoom in by factor of two about that point

Or, to Da

Label all possible matches Label matches used for scoring

Show Y-axis

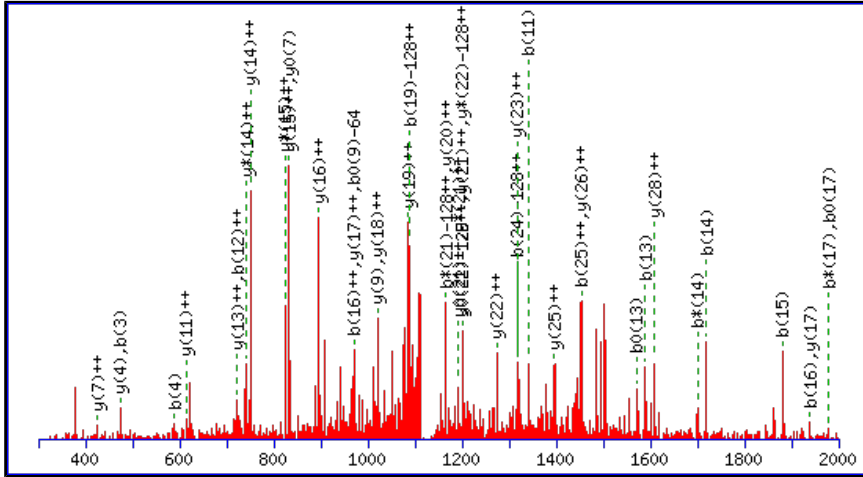

Monoisotopic mass of neutral peptide Mr(calc): 3379.3203

Fixed modifications: Carbamidomethyl (C) (apply to specified residues or termini only)

Variable modifications:

- N4 : Deamidated (NQ)
- M8 : Oxidation (M), with neutral losses 0.0000(shown in table), 63.9983
- Q14 : Deamidated (NQ)
- M19 : Oxidation (M), with neutral losses 0.0000(shown in table), 63.9983
- N24 : Deamidated (NQ)

Ions Score: 100 Expect: 8.4e-010

Matches : 44/550 fragment ions using 51 most intense peaks ([help](#))

| #  | b         | b <sup>++</sup> | b <sup>*</sup> | b <sup>*++</sup> | b <sup>0</sup> | b <sup>0++</sup> | Seq. | y         | y <sup>++</sup> | y <sup>*</sup> | y <sup>*++</sup> | y <sup>0</sup> | y <sup>0++</sup> | #  |
|----|-----------|-----------------|----------------|------------------|----------------|------------------|------|-----------|-----------------|----------------|------------------|----------------|------------------|----|
| 1  | 164.0706  | 82.5389         |                |                  |                |                  | Y    |           |                 |                |                  |                |                  | 29 |
| 2  | 311.1390  | 156.0731        |                |                  |                |                  | F    | 3217.2642 | 1609.1357       | 3200.2377      | 1600.6225        | 3199.2536      | 1600.1305        | 28 |
| 3  | 474.2023  | 237.6048        |                |                  |                |                  | Y    | 3070.1958 | 1535.6015       | 3053.1692      | 1527.0883        | 3052.1852      | 1526.5963        | 27 |
| 4  | 589.2293  | 295.1183        | 572.2027       | 286.6050         |                |                  | N    | 2907.1325 | 1454.0699       | 2890.1059      | 1445.5566        | 2889.1219      | 1445.0646        | 26 |
| 5  | 646.2508  | 323.6290        | 629.2242       | 315.1157         |                |                  | G    | 2792.1055 | 1396.5564       | 2775.0790      | 1388.0431        | 2774.0950      | 1387.5511        | 25 |
| 6  | 747.2984  | 374.1529        | 730.2719       | 365.6396         | 729.2879       | 365.1476         | T    | 2735.0841 | 1368.0457       | 2718.0575      | 1359.5324        | 2717.0735      | 1359.0404        | 24 |
| 7  | 834.3305  | 417.6689        | 817.3039       | 409.1556         | 816.3199       | 408.6636         | S    | 2634.0364 | 1317.5218       | 2617.0098      | 1309.0086        | 2616.0258      | 1308.5165        | 23 |
| 8  | 981.3659  | 491.1866        | 964.3393       | 482.6733         | 963.3553       | 482.1813         | M    | 2547.0043 | 1274.0058       | 2529.9778      | 1265.4925        | 2528.9938      | 1265.0005        | 22 |
| 9  | 1052.4030 | 526.7051        | 1035.3764      | 518.1919         | 1034.3924      | 517.6998         | A    | 2399.9689 | 1200.4881       | 2382.9424      | 1191.9748        | 2381.9584      | 1191.4828        | 21 |
| 10 | 1212.4336 | 606.7205        | 1195.4071      | 598.2072         | 1194.4231      | 597.7152         | C    | 2328.9318 | 1164.9696       | 2311.9053      | 1156.4563        | 2310.9213      | 1155.9643        | 20 |
| 11 | 1341.4762 | 671.2417        | 1324.4497      | 662.7285         | 1323.4657      | 662.2365         | E    | 2168.9012 | 1084.9542       | 2151.8746      | 1076.4410        | 2150.8906      | 1075.9489        | 19 |
| 12 | 1442.5239 | 721.7656        | 1425.4973      | 713.2523         | 1424.5133      | 712.7603         | T    | 2039.8586 | 1020.4329       | 2022.8320      | 1011.9197        | 2021.8480      | 1011.4277        | 18 |
| 13 | 1589.5923 | 795.2998        | 1572.5658      | 786.7865         | 1571.5817      | 786.2945         | F    | 1938.8109 | 969.9091        | 1921.7844      | 961.3958         | 1920.8003      | 960.9038         | 17 |
| 14 | 1718.6349 | 859.8211        | 1701.6084      | 851.3078         | 1700.6243      | 850.8158         | Q    | 1791.7425 | 896.3749        | 1774.7159      | 887.8616         | 1773.7319      | 887.3696         | 16 |
| 15 | 1881.6982 | 941.3528        | 1864.6717      | 932.8395         | 1863.6877      | 932.3475         | Y    | 1662.6999 | 831.8536        | 1645.6734      | 823.3403         | 1644.6893      | 822.8483         | 15 |
| 16 | 1938.7197 | 969.8635        | 1921.6931      | 961.3502         | 1920.7091      | 960.8582         | G    | 1499.6366 | 750.3219        | 1482.6100      | 741.8087         | 1481.6260      | 741.3166         | 14 |
| 17 | 1995.7412 | 998.3742        | 1978.7146      | 989.8609         | 1977.7306      | 989.3689         | G    | 1442.6151 | 721.8112        | 1425.5886      | 713.2979         | 1424.6045      | 712.8059         | 13 |
| 18 | 2155.7718 | 1078.3895       | 2138.7453      | 1069.8763        | 2137.7612      | 1069.3843        | C    | 1385.5936 | 693.3005        | 1368.5671      | 684.7872         | 1367.5831      | 684.2952         | 12 |
| 19 | 2302.8072 | 1151.9072       | 2285.7807      | 1143.3940        | 2284.7966      | 1142.9020        | M    | 1225.5630 | 613.2851        | 1208.5364      | 604.7719         | 1207.5524      | 604.2799         | 11 |
| 20 | 2359.8287 | 1180.4180       | 2342.8021      | 1171.9047        | 2341.8181      | 1171.4127        | G    | 1078.5276 | 539.7674        | 1061.5010      | 531.2542         | 1060.5170      | 530.7622         | 10 |
| 21 | 2473.8716 | 1237.4394       | 2456.8451      | 1228.9262        | 2455.8610      | 1228.4342        | N    | 1021.5061 | 511.2567        | 1004.4796      | 502.7434         | 1003.4956      | 502.2514         | 9  |



|    |           |           |           |           |           |           |   |          |          |          |          |          |          |   |
|----|-----------|-----------|-----------|-----------|-----------|-----------|---|----------|----------|----------|----------|----------|----------|---|
| 22 | 2530.8931 | 1265.9502 | 2513.8665 | 1257.4369 | 2512.8825 | 1256.9449 | G | 907.4632 | 454.2352 | 890.4367 | 445.7220 | 889.4526 | 445.2300 | 8 |
| 23 | 2644.9360 | 1322.9716 | 2627.9094 | 1314.4584 | 2626.9254 | 1313.9664 | N | 850.4417 | 425.7245 | 833.4152 | 417.2112 | 832.4312 | 416.7192 | 7 |
| 24 | 2759.9629 | 1380.4851 | 2742.9364 | 1371.9718 | 2741.9524 | 1371.4798 | N | 736.3988 | 368.7030 | 719.3723 | 360.1898 | 718.3883 | 359.6978 | 6 |
| 25 | 2907.0313 | 1454.0193 | 2890.0048 | 1445.5060 | 2889.0208 | 1445.0140 | F | 621.3719 | 311.1896 | 604.3453 | 302.6763 | 603.3613 | 302.1843 | 5 |
| 26 | 3006.0998 | 1503.5535 | 2989.0732 | 1495.0402 | 2988.0892 | 1494.5482 | V | 474.3035 | 237.6554 | 457.2769 | 229.1421 | 456.2929 | 228.6501 | 4 |
| 27 | 3107.1474 | 1554.0774 | 3090.1209 | 1545.5641 | 3089.1369 | 1545.0721 | T | 375.2350 | 188.1212 | 358.2085 | 179.6079 | 357.2245 | 179.1159 | 3 |
| 28 | 3206.2159 | 1603.6116 | 3189.1893 | 1595.0983 | 3188.2053 | 1594.6063 | V | 274.1874 | 137.5973 | 257.1608 | 129.0840 |          |          | 2 |
| 29 |           |           |           |           |           |           | R | 175.1190 | 88.0631  | 158.0924 | 79.5498  |          |          | 1 |

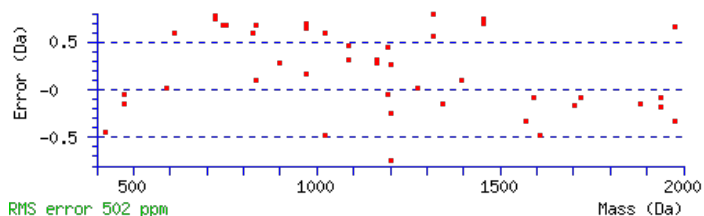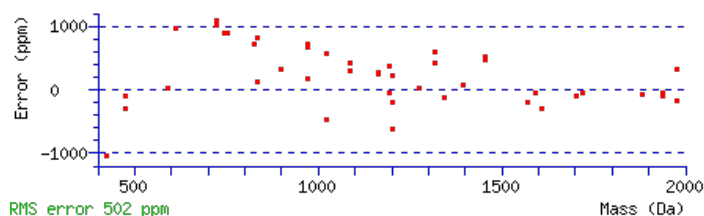

NCBI BLAST search of [YFYNGTSMACETFQYGGCMGNGNNEFVTVR](#)  
 (Parameters: blastp, nr protein database, expect=20000, no filter, PAM30)  
 Other BLAST [web gateways](#)

All matches to this query

| Score | Mr(calc)  | Delta  | Sequence                                       | Site Analysis                  |
|-------|-----------|--------|------------------------------------------------|--------------------------------|
| 99.6  | 3379.3203 | 0.9972 | <a href="#">YFYNGTSMACETFQYGGCMGNGNNEFVTVR</a> | Deamidated N4, Q14, N24 28.78% |
| 99.6  | 3379.3203 | 0.9972 | <a href="#">YFYNGTSMACETFQYGGCMGNGNNEFVTVR</a> | Deamidated N4, Q14, N23 28.78% |
| 99.6  | 3379.3203 | 0.9972 | <a href="#">YFYNGTSMACETFQYGGCMGNGNNEFVTVR</a> | Deamidated N4, Q14, N21 28.78% |
| 98.5  | 3379.3203 | 0.9972 | <a href="#">YFYNGTSMACETFQYGGCMGNGNNEFVTEK</a> |                                |
| 97.4  | 3380.3043 | 0.0132 | <a href="#">YFYNGTSMACETFQYGGCMGNGNNEFVTEK</a> |                                |
| 92.7  | 3380.3043 | 0.0132 | <a href="#">YFYNGTSMACETFQYGGCMGNGNNEFVTEK</a> |                                |
| 92.7  | 3380.3043 | 0.0132 | <a href="#">YFYNGTSMACETFQYGGCMGNGNNEFVTEK</a> |                                |
| 90.5  | 3380.3043 | 0.0132 | <a href="#">YFYNGTSMACETFQYGGCMGNGNNEFVTEK</a> |                                |
| 89.9  | 3379.3203 | 0.9972 | <a href="#">YFYNGTSMACETFQYGGCMGNGNNEFVTEK</a> |                                |
| 89.0  | 3380.3043 | 0.0132 | <a href="#">YFYNGTSMACETFQYGGCMGNGNNEFVTVR</a> |                                |

Mascot: <http://www.matrixscience.com/>
